# Supplementary material for: A genome-wide SNP scan accelerates trait-regulatory genomic loci identification in chickpea
Source: PubMed Central journal article supplement (PMC4461920; doi:10.1038/srep11166), 2015-06-10
Supplement: srep11166-s1.pdf [file srep11166-s1.pdf]

# **A genome-wide SNP scan accelerates trait-regulatory genomic loci identification in chickpea**

**Alice Kujur<sup>1a</sup>, Deepak Bajaj<sup>1a</sup>, Hari D. Upadhyaya<sup>2a</sup>, Shouvik Das<sup>1</sup>, Rajeev Ranjan<sup>1</sup>, Tanima Shree<sup>1</sup>, Maneesha S. Saxena<sup>1</sup>, Saurabh Badoni<sup>1</sup>, Vinod Kumar<sup>3</sup>, Shailesh Tripathi<sup>4</sup>, C.L.L. Gowda<sup>2</sup>, Shivali Sharma<sup>2</sup>, Sube Singh<sup>2</sup>, Akhilesh K. Tyagi<sup>1</sup>, Swarup K. Parida<sup>1\*</sup>**

<sup>1</sup>National Institute of Plant Genome Research (NIPGR), Aruna Asaf Ali Marg, New Delhi 110067, India

<sup>2</sup>International Crops Research Institute for the Semi-Arid Tropics (ICRISAT), Patancheru 502324, Andhra Pradesh, India

<sup>3</sup>National Research Centre on Plant Biotechnology (NRCPB), New Delhi 110012, India

<sup>4</sup>Division of Genetics, Indian Agricultural Research Institute (IARI), New Delhi 110012, India

<sup>a</sup>These authors contributed equally to this work.

\*Corresponding Author

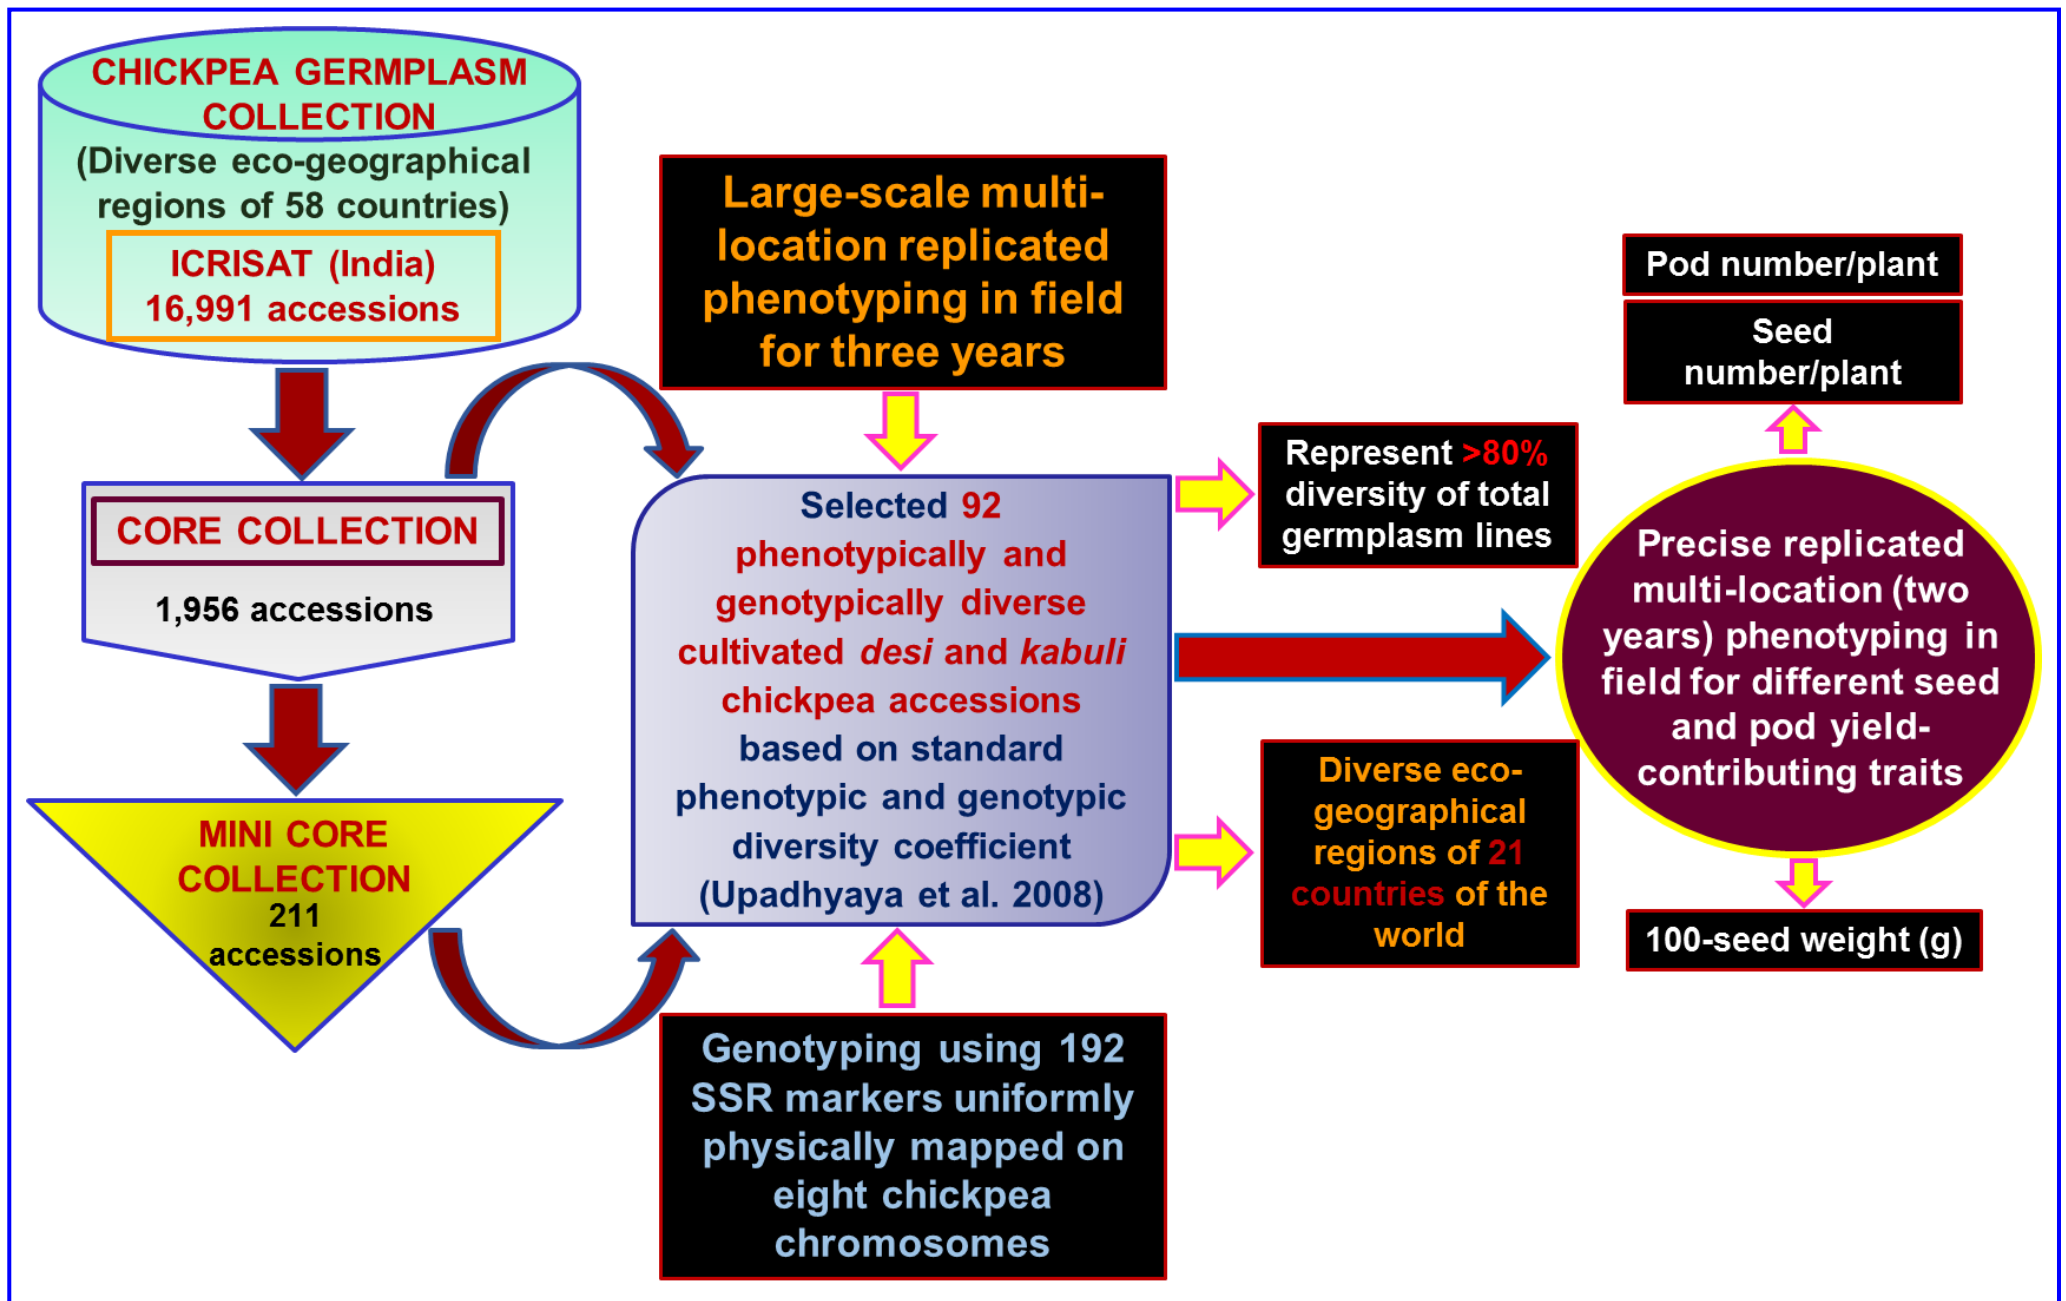

**Fig. S1:** Major steps/strategies followed for selecting 92 phenotypically and genotypically diverse chickpea accessions belonging to a seed and pod trait-specific association panel from 16991, including 1956 core and 211 mini-core germplasm lines that are available at the International Crops Research Institute for the Semi-Arid Tropics (ICRISAT), India.

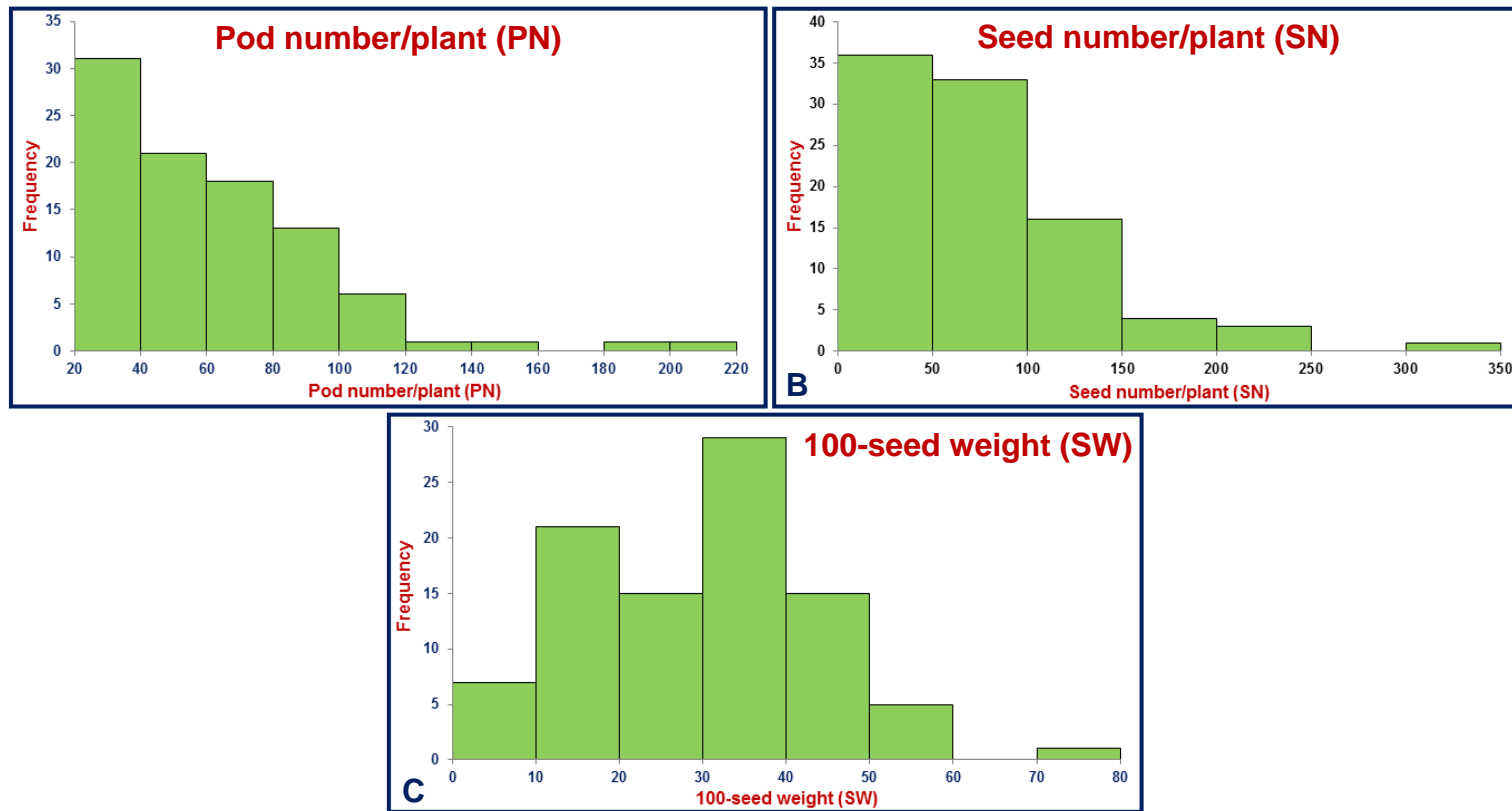

**Fig. S2:** Frequency distribution (histogram) of three seed and pod yield-contributing quantitative traits (PN, SN and SW) in 92 chickpea accessions belonging to an association panel. Blank lines represent the null distribution.

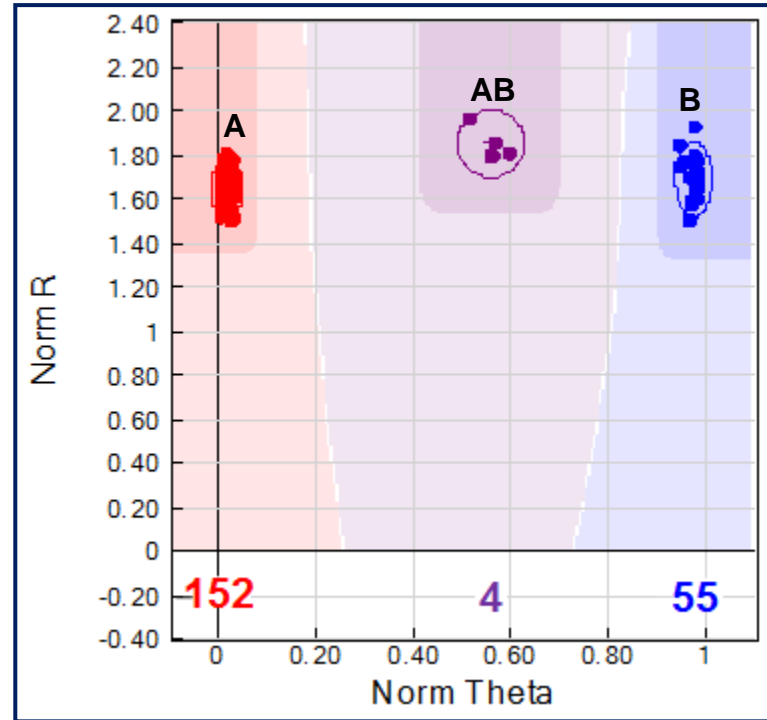

**Fig. S3:** Example of one SNP (A/G) validated in a cellulose synthase gene by the Illumina GoldenGate genotyping assay showing homozygous and heterozygous cluster separation for 211 chickpea minicore accessions based on plotting of normalised R [sum of intensities of the two channels (Cy3 and Cy5)] on the y-axis vs. normalised theta [ $(2/\pi)\text{Tan}^{-1}(\text{Cy5}/\text{Cy3})$ ] on the x-axis. A normalised theta value nearest 0 is homozygous for allele A (red), a theta value nearest 0.5 is heterozygote AB (violet) and a theta value nearest 1 is homozygous for allele B (blue).



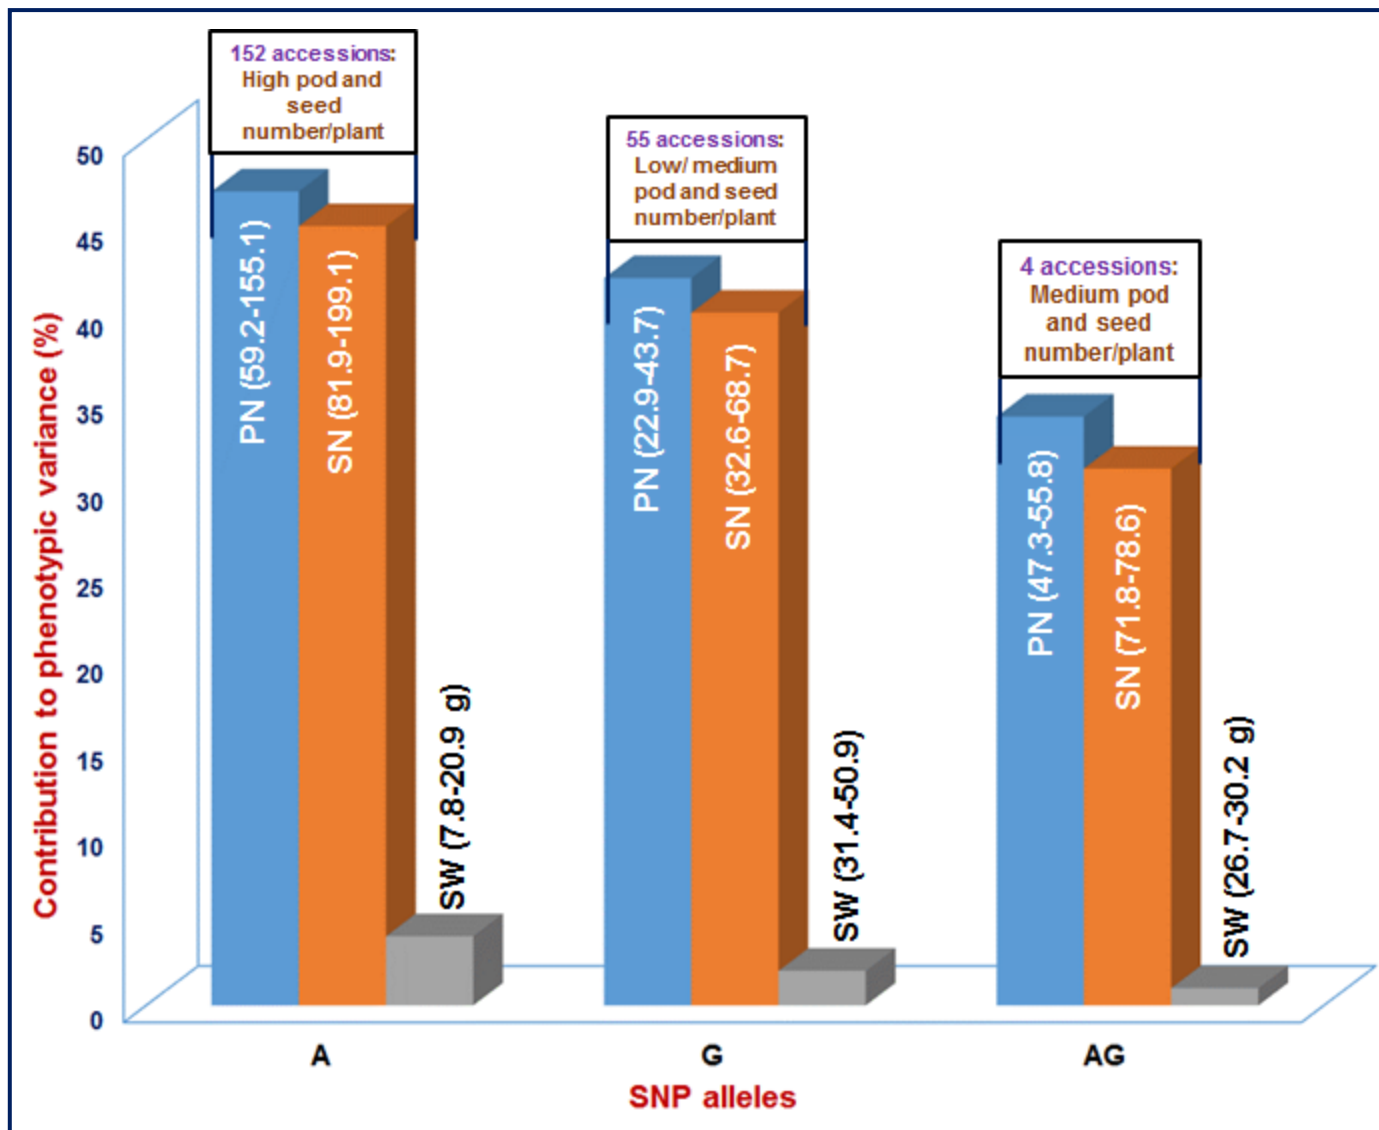

**Fig. S4:** Large-scale validation and marker allele effects of GWAS-associated SNP (A/G) identified in URR of a cellulose synthase gene for PN, SN and SW trait variation in 211 chickpea minicore accessions. The significant contributions of A- and G-alleles with ~40-45% PN and SN phenotypic variation in 152 high and 55 low pod- and seed number-containing accessions were evident. AG allele had 30-35% PVE for PN and SN in four medium pod- and seed number-containing accessions. Low trait association potential of these gene-based SNP alleles with SW was evident. Range of phenotypic variation observed for PN, SN and SW traits in minicore accessions are mentioned inside the bars.

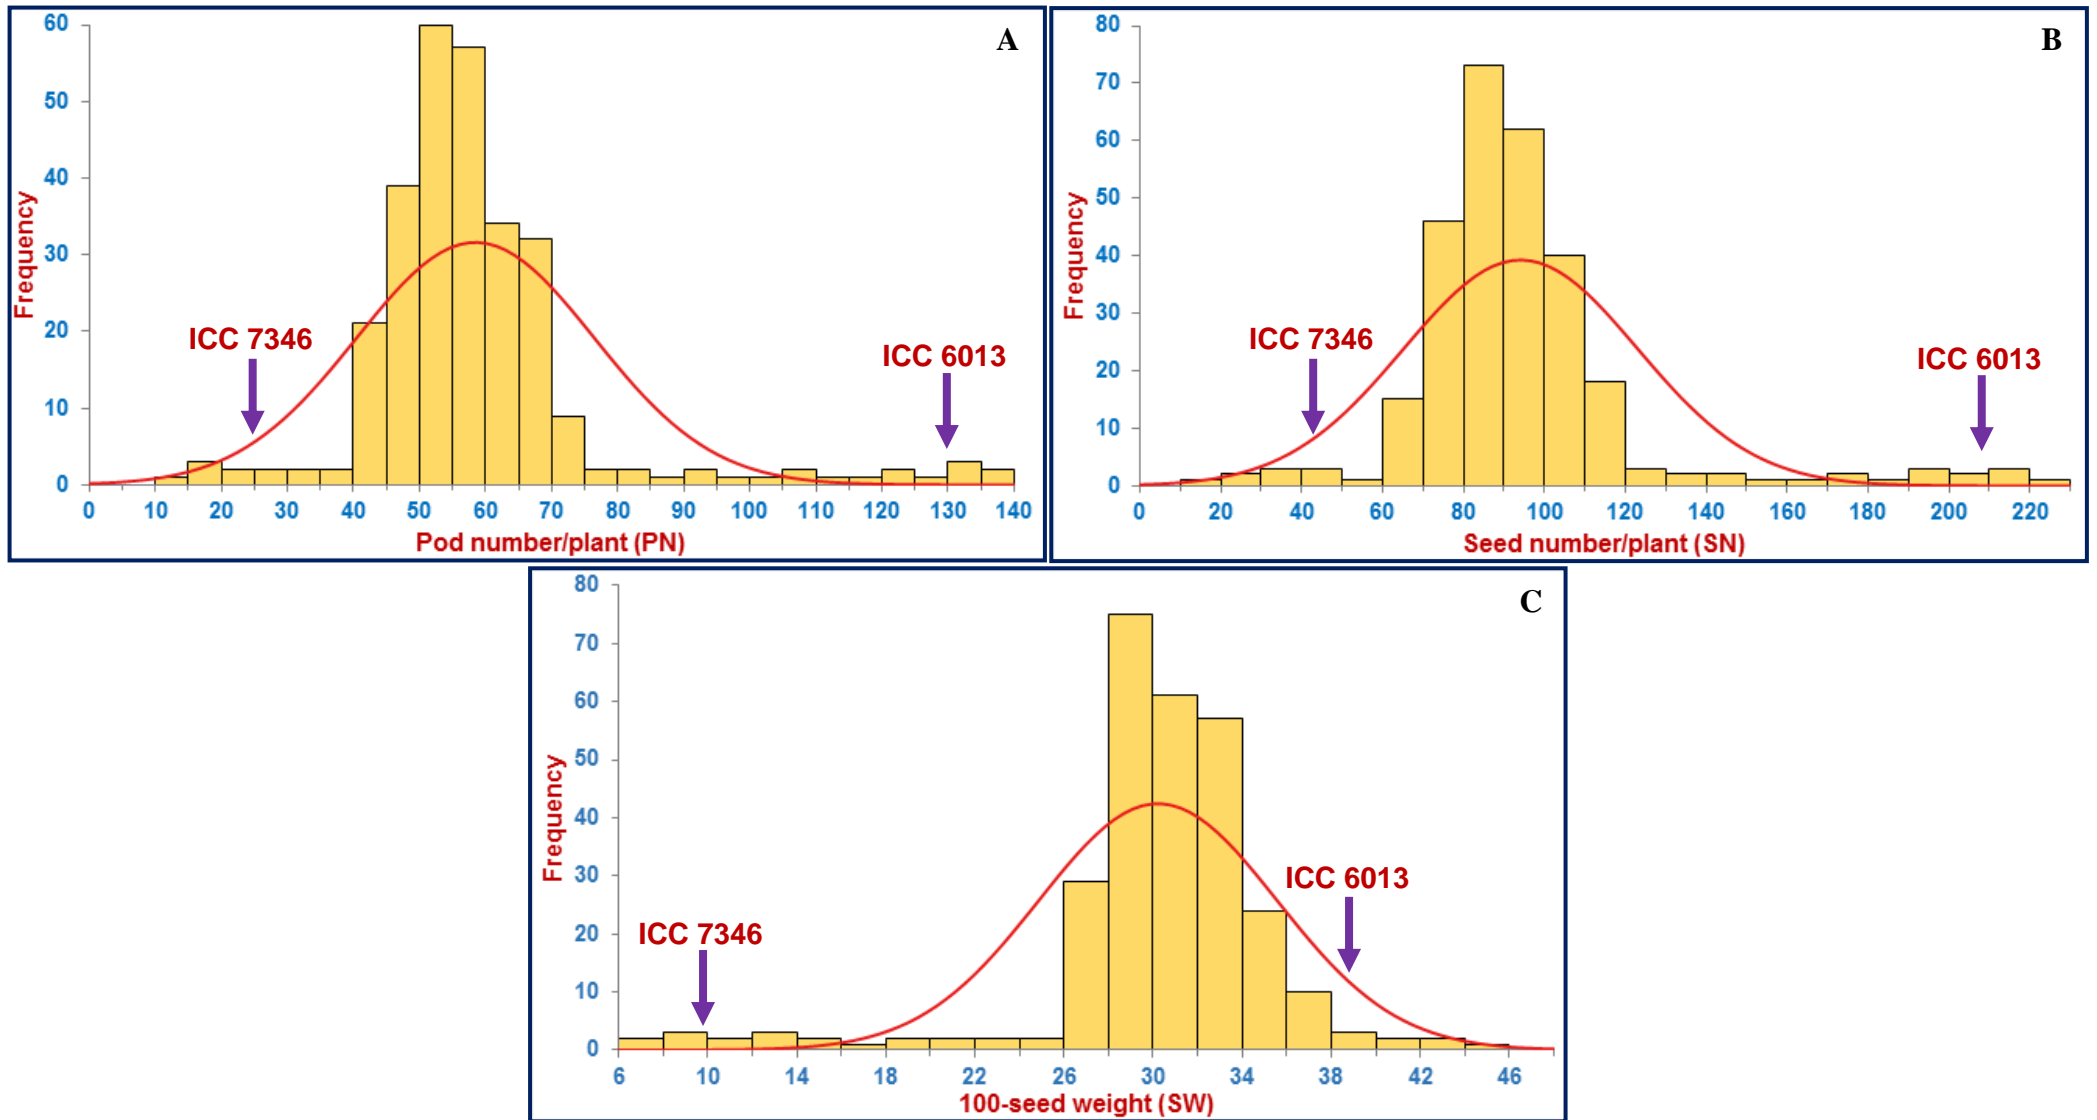

**Fig. S5:** Frequency distribution of three seed and pod yield-contributing quantitative traits; PN (A), SN (B) and SW (C) in 283 F<sub>4</sub> mapping individuals (ICC 6013 x ICC 7346) and parental accessions, depicted a goodness of fit to the normal distribution.



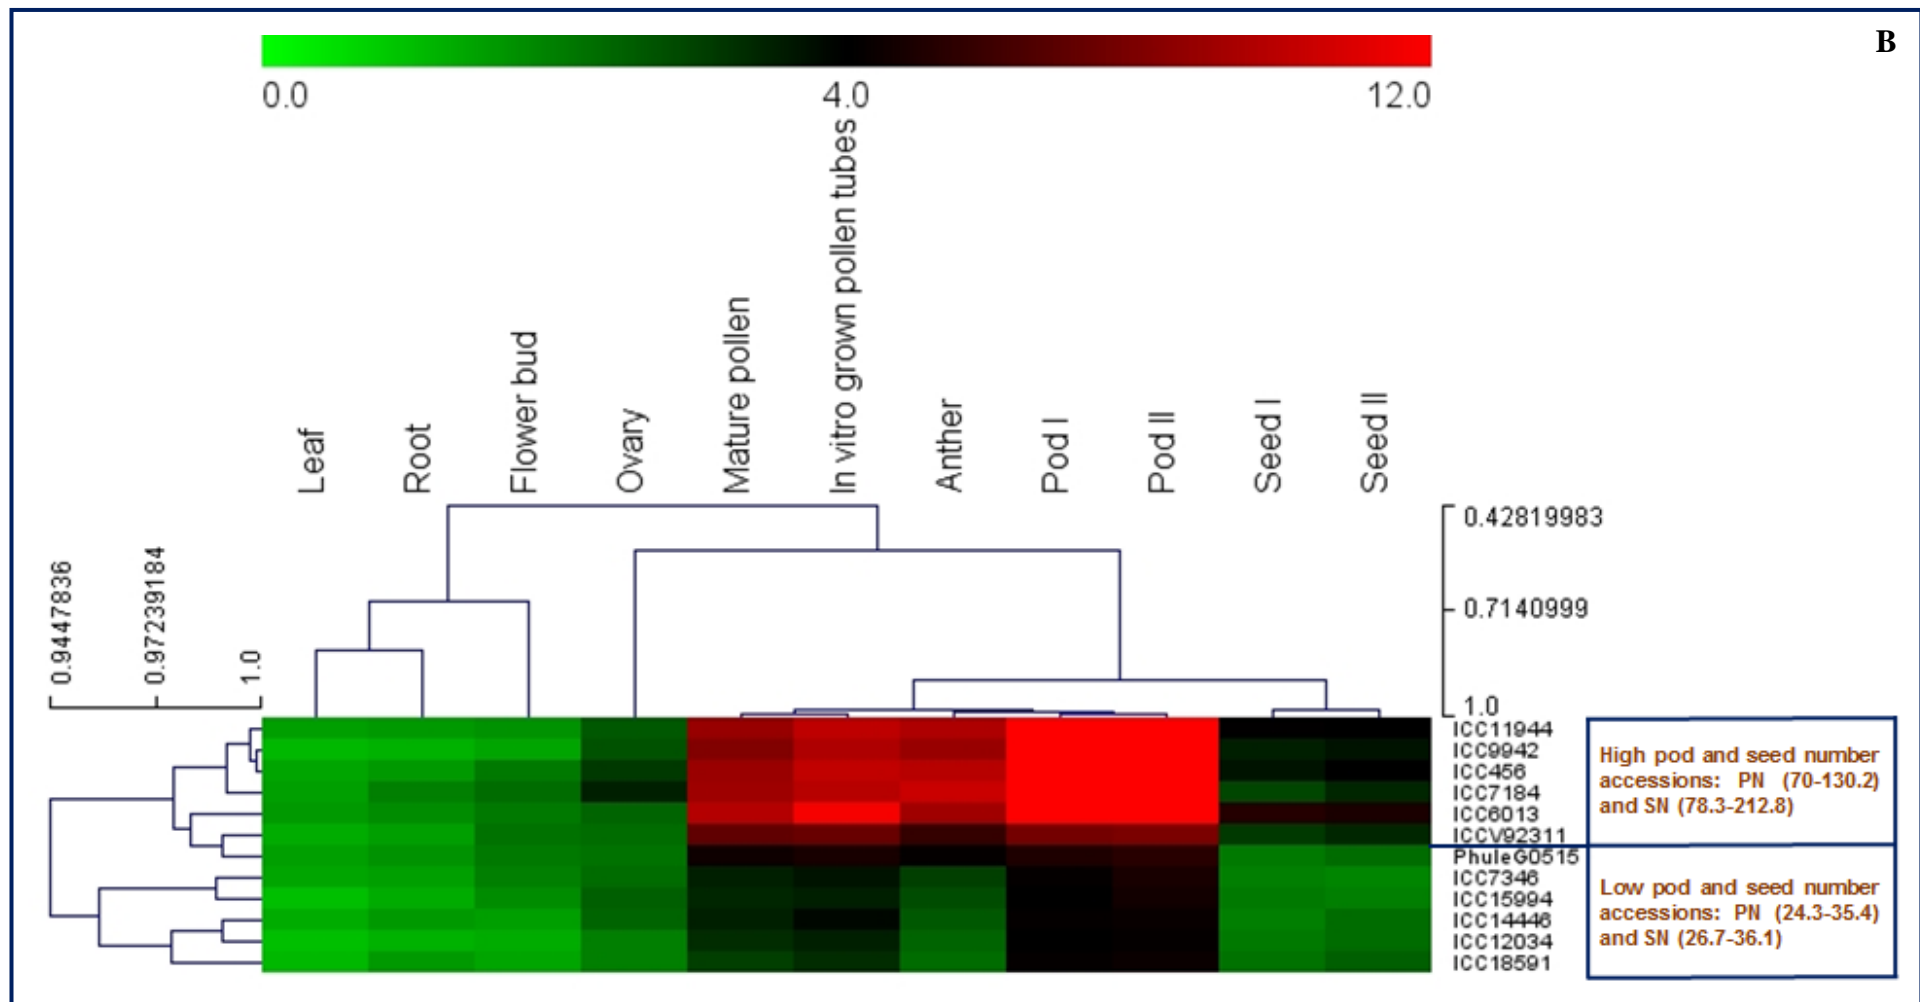

**Fig. S6:** Hierarchical cluster display represented differential expression profiles of (A) 12 genes and gene-associated targets (validated by GWAS and QTL mapping) including a (B) cellulose synthase gene (validated by GWAS, QTL mapping and expression profiling) in seven different vegetative and reproductive tissues and two pod developmental stages of high (ICCV 92311, ICC 6013, ICC 9942, ICC 11944, ICC 456 and ICC 7184) and low (Phule G0515, ICC 7346, ICC 15994, ICC 14446, ICC 12034 and ICC 18591) pod and seed number-containing accessions. The colour scale at the top represents average log signal expression values of genes in various tissues and developmental stages; in which green, black and red color signify low, medium and high level of expression, respectively. (A) One cellulose synthase *kabuli* gene (Ca17942) showing higher differential up-regulation during pod development of high pod and seed number-containing accession (ICC 6013) is highlighted with red boxes. The details on identities of genes are mentioned in the Table 3. (A) The tissues and genes used for expression profiling are mentioned on the right and top side of expression map, respectively. (B) The tissues and genotypes used for expression profiling are mentioned on the top and right side of expression map, respectively.

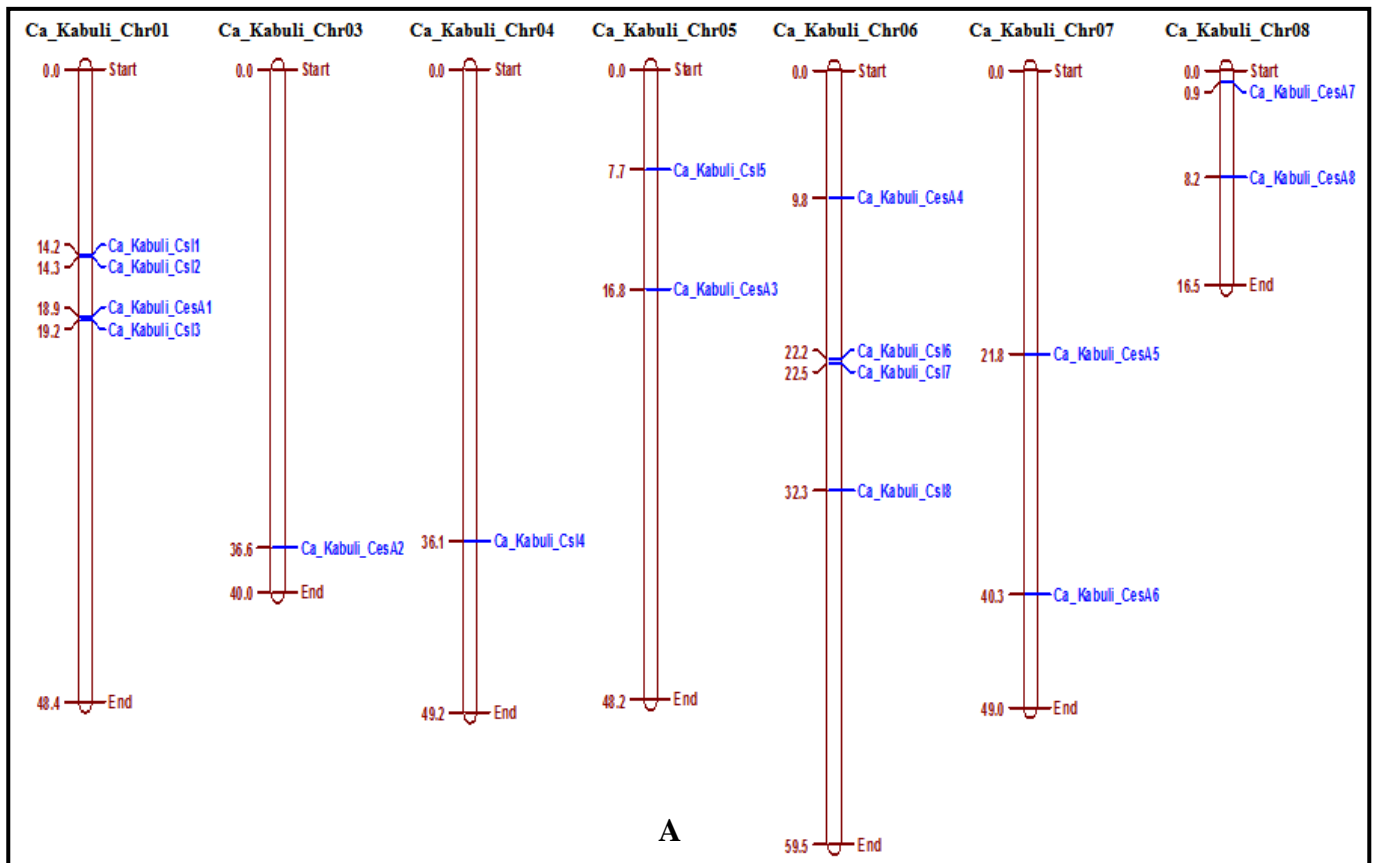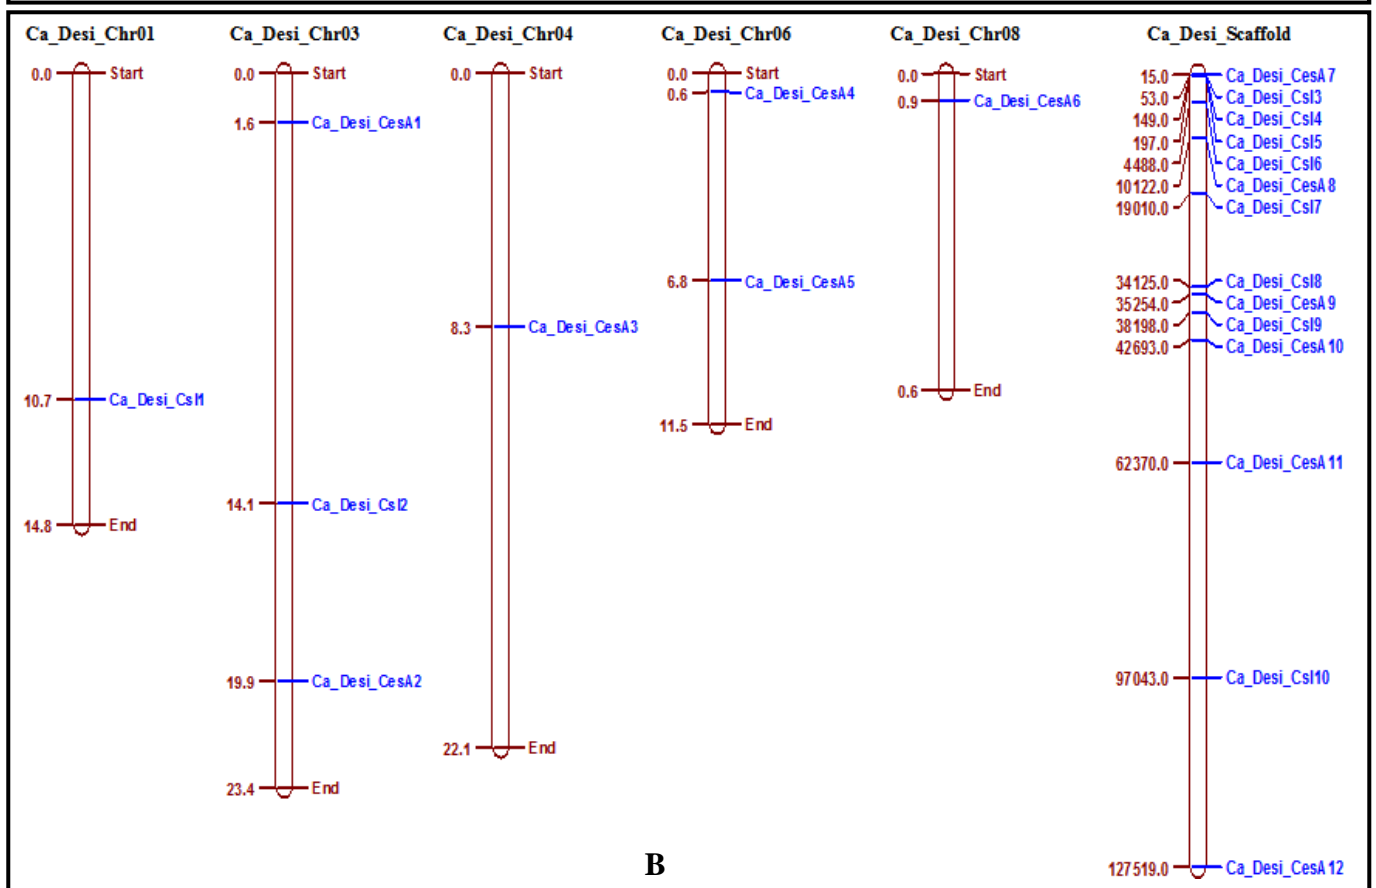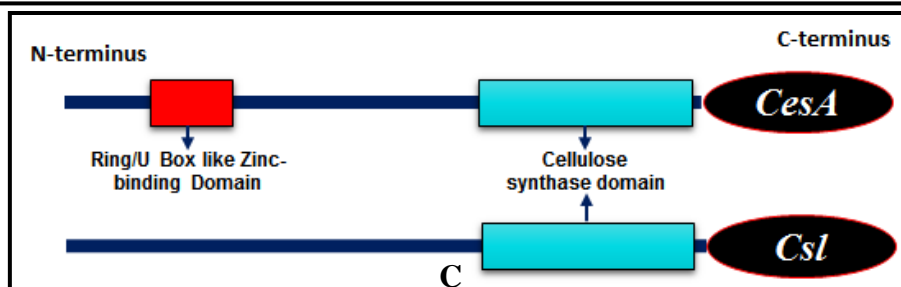

**Fig. S7:** A physical map depicting the genomic distribution of 38 non-redundant cellulose synthase protein-encoding genes on chromosomes/scaffolds of *kabuli* (**A**) and *desi* (**B**) genomes. The physical distance (Mb) and identities of the genes integrated on the chromosomes/scaffolds are indicated on the left and right side of the chromosomes, respectively. The size of the chromosomes (Mb) are based on the draft genome sequences of *kabuli* (Varshney et al., 2013) and *desi* (Jain et al., 2013). Details regarding identities of two classes of cellulose synthase genes annotated from *desi* and *kabuli* genomes are mentioned in the Table S6. (**C**) Broad classification of 38 chickpea genes belonging to cellulose synthase superfamily into two groups based on diverse domain organization of representative cellulose synthase-encoding proteins from each of the cellulose synthase A (*CesA*) and cellulose synthase-like (*Csl*) family.

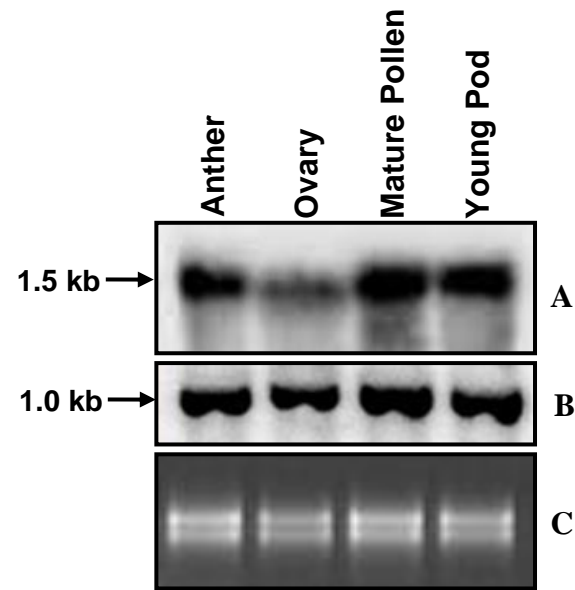

**Fig. S8:** Autoradiogram showing northern hybridisation pattern of a high pod number-regulating superior cellulose synthase gene-based haplotype (**A**) in the anther, ovary, mature pollen and young pod of a high pod number-containing chickpea accession (ICC 6013). The transcripts sizes (in kb) hybridising with the probes (**A**: cellulose synthase gene-specific haplotype and **B**: elongation factor 1-alpha as the internal control) are indicated by arrows. **C**: Normalised RNA isolated from the anther, ovary and mature pollen and young pod tissues of ICC 6013.

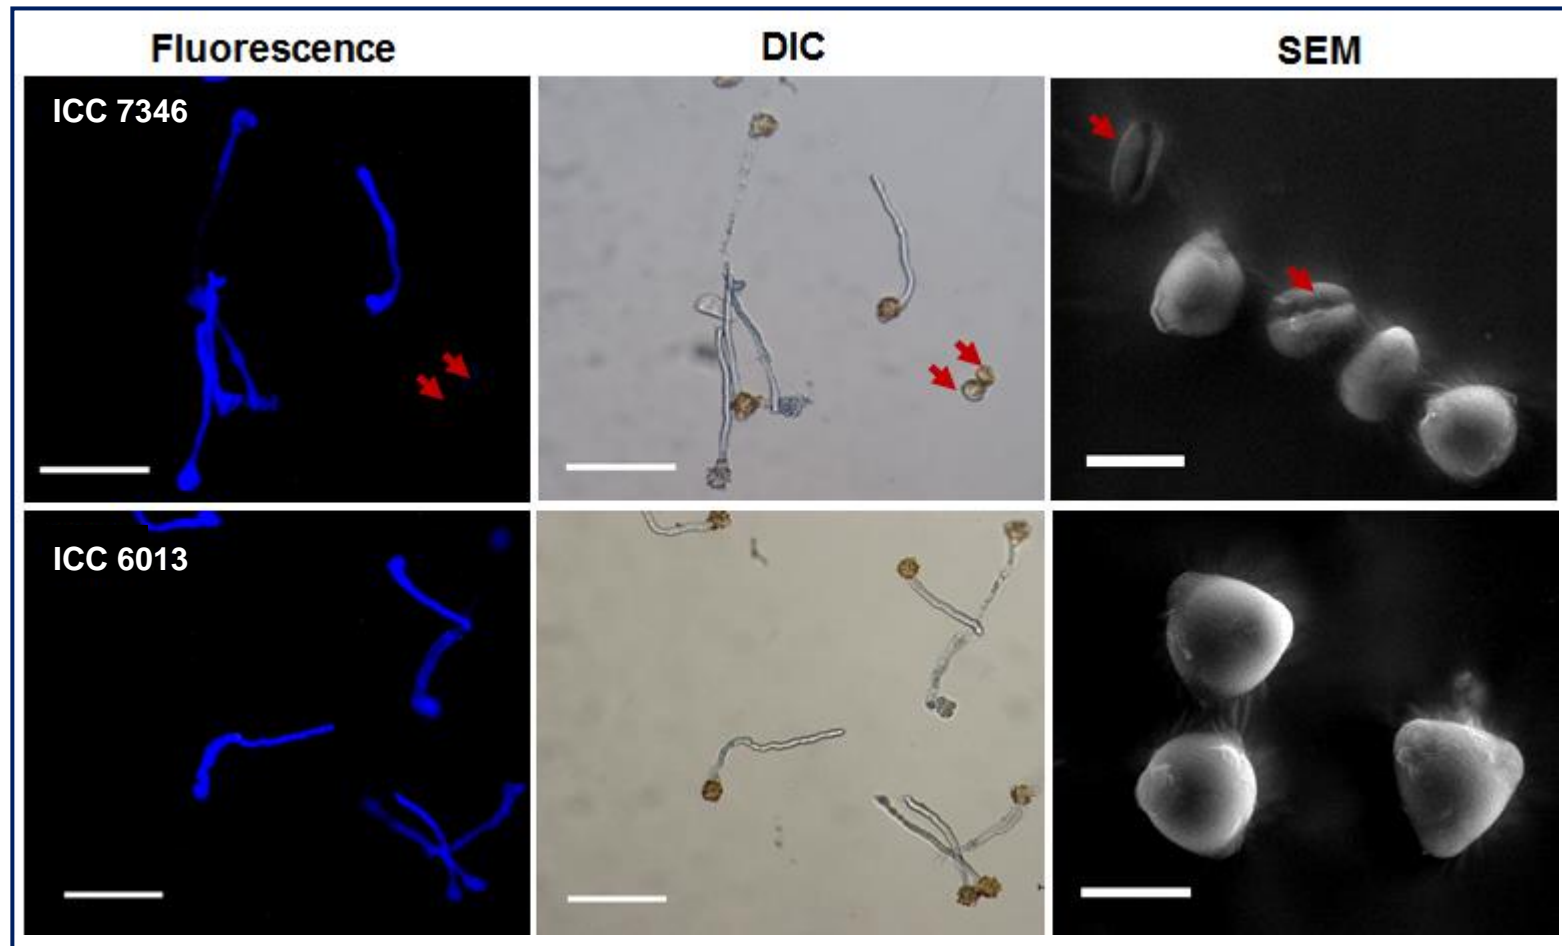

**Fig. S9:** Observation of pollen and pollen tube growth. Pollens of high (ICC 6013) and low (ICC 7346) pod number-containing accessions were used for *in vitro* germination and observed under differential interference contrast (DIC) and fluorescence channel microscopy after staining with calcofluor white fluorescent dye. Red arrows in the fluorescence and DIC panels indicate the pollen of the Phule G0515 accession that failed to germinate and that did not show fluorescent blue signals possibly due to its low cellulose content. Scanning electron microscope (SEM) images depict the presence of some irregular shaped pollen specifically in the ICC 7346 accession. (Scale bars: fluorescence and DIC, 100  $\mu$ m, and SEM, 20  $\mu$ m).



**Table S1: Chickpea accessions belonging to a seed and pod trait-specific association panel) selected for GWAS**

| Sl. No. | Accession Numbers | Cultivar types | Geographical origin | Biological status                            |
|---------|-------------------|----------------|---------------------|----------------------------------------------|
| 1       | ICC5590           | <i>Desi</i>    | India               | Breeding/Research material                   |
| 2       | ICC6013           | <i>Desi</i>    | India               | Breeding/Research material                   |
| 3       | ICC5002           | <i>Desi</i>    | India               | Breeding/Research material                   |
| 4       | ICC7184           | <i>Desi</i>    | Turkey              | Traditional cultivar/Landraces               |
| 5       | ICC4926           | <i>Desi</i>    | India               | Breeding/Research material                   |
| 6       | ICC4657           | <i>Desi</i>    | India               | Traditional cultivar/Landraces               |
| 7       | ICC12299          | <i>Desi</i>    | Nepal               | Traditional cultivar/Landraces               |
| 8       | ICC456            | <i>Desi</i>    | India               | Traditional cultivar/Landraces               |
| 9       | ICC12726          | <i>Desi</i>    | Ethiopia            | Traditional cultivar/Landraces               |
| 10      | ICC11944          | <i>Desi</i>    | Nepal               | Traditional cultivar/Landraces               |
| 11      | ICC11498          | <i>Desi</i>    | India               | Traditional cultivar/Landraces               |
| 12      | ICC9942           | <i>Desi</i>    | India               | Traditional cultivar/Landraces               |
| 13      | ICC2072           | <i>Desi</i>    | India               | Traditional cultivar/Landraces               |
| 14      | ICC9737           | <i>Desi</i>    | Afghanistan         | Traditional cultivar/Landraces               |
| 15      | ICC9002           | <i>Desi</i>    | Iran                | Traditional cultivar/Landraces               |
| 16      | ICC16374          | <i>Desi</i>    | Malawi              | Breeding material                            |
| 17      | ICC12028          | <i>Desi</i>    | Mexico              | Traditional cultivar/Landraces               |
| 18      | ICC8318           | <i>Desi</i>    | India               | Traditional cultivar/Landraces               |
| 19      | ICC15610          | <i>Desi</i>    | India               | Traditional cultivar/Landraces               |
| 20      | ICC4918           | <i>Desi</i>    | India               | Advanced cultivar                            |
| 21      | ICC1836           | <i>Desi</i>    | India               | Traditional cultivar/Landraces               |
| 22      | ICC15061          | <i>Desi</i>    | India               | Traditional cultivar/Landraces               |
| 23      | ICC4958           | <i>Desi</i>    | Central India       | Traditional cultivar/Landraces/genetic stock |
| 24      | ICCV10            | <i>Desi</i>    | India               | Released Cultivar                            |
| 25      | ICCX-810800       | <i>Desi</i>    | Northern India      | Variety                                      |
| 26      | IC296132          | <i>Desi</i>    | Northern India      | Variety                                      |
| 27      | IC296131          | <i>Desi</i>    | Northern India      | Variety                                      |
| 28      | BGD112            | <i>Desi</i>    | Northern India      | Genetic stock                                |
| 29      | ICC4951           | <i>Desi</i>    | Central India       | Landraces                                    |
| 30      | ICC8933           | <i>Desi</i>    | Northern India      | Genetic stock                                |
| 31      | ICCV93954         | <i>Desi</i>    | Southern India      | Variety                                      |
| 32      | BGD72             | <i>Desi</i>    | Northern India      | Genetic stock                                |
| 33      | IC296133          | <i>Desi</i>    | Northern India      | Variety                                      |
| 34      | ICCV92944         | <i>Desi</i>    | Central India       | Variety                                      |
| 35      | ICCC37            | <i>Desi</i>    | Southern India      | Variety                                      |
| 36      | ICCX-820065       | <i>Desi</i>    | Western India       | Variety                                      |
| 37      | Pusa5028          | <i>Desi</i>    | Northern India      | Variety                                      |
| 38      | Pusa547           | <i>Desi</i>    | Northern India      | Variety                                      |
| 39      | G130              | <i>Desi</i>    | India               | Released Cultivar                            |
| 40      | ICC13523          | <i>Kabuli</i>  | Iran                | Traditional cultivar/Landraces               |
| 41      | ICC15802          | <i>Kabuli</i>  | Syria               | Traditional cultivar/Landraces               |
| 42      | ICC13077          | <i>Kabuli</i>  | India               | Traditional cultivar/Landraces               |
| 43      | ICC15264          | <i>Kabuli</i>  | Iran                | Traditional cultivar/Landraces               |
| 44      | ICC7308           | <i>Kabuli</i>  | Peru                | Traditional cultivar/Landraces               |
| 45      | ICC15435          | <i>Kabuli</i>  | Morocco             | Traditional cultivar/Landraces               |
| 46      | ICC7295           | <i>Kabuli</i>  | Tunisia             | Traditional cultivar/Landraces               |
| 47      | ICC12328          | <i>Kabuli</i>  | Cyprus              | Traditional cultivar/Landraces               |
| 48      | ICC14446          | <i>Kabuli</i>  | Italy               | Traditional cultivar/Landraces               |
| 49      | ICC10755          | <i>Kabuli</i>  | Turkey              | Traditional cultivar/Landraces               |
| 50      | ICC14190          | <i>Kabuli</i>  | India               | Traditional cultivar/Landraces               |
| 51      | ICC8042           | <i>Kabuli</i>  | Iran                | Traditional cultivar/Landraces               |

| Sl. No. | Accession Numbers | Cultivar types          | Geographical origin      | Biological status             |
|---------|-------------------|-------------------------|--------------------------|-------------------------------|
| 52      | ICC8261           | <i>Kabuli</i>           | Turkey                   | Traditional cultivar/Landrace |
| 53      | ICC15333          | <i>Kabuli</i>           | Iran                     | Traditional cultivar/Landrace |
| 54      | ICC15512          | <i>Kabuli</i>           | Morocco                  | Traditional cultivar/Landrace |
| 55      | ICC10884          | <i>Kabuli</i>           | Ethiopia                 | Traditional cultivar/Landrace |
| 56      | ICC15551          | <i>Kabuli</i>           | Australia                | Traditional cultivar/Landrace |
| 57      | ICC15725          | <i>Kabuli</i>           | Syrian Arab Republic     | Traditional cultivar/Landrace |
| 58      | ICC6204           | <i>Kabuli</i>           | Spain                    | Traditional cultivar/Landrace |
| 59      | ICC6210           | <i>Kabuli</i>           | Spain                    | Traditional cultivar/Landrace |
| 60      | ICC7654           | <i>Kabuli</i>           | Turkey                   | Traditional cultivar/Landrace |
| 61      | ICC11847          | <i>Kabuli</i>           | Chile                    | Traditional cultivar/Landrace |
| 62      | ICC11749          | <i>Kabuli</i>           | Chile                    | Traditional cultivar/Landrace |
| 63      | ICC14199          | <i>Kabuli</i>           | Mexico                   | Breeding material             |
| 64      | ICC15518          | <i>Kabuli</i>           | Morocco                  | Traditional cultivar/Landrace |
| 65      | ICC16814          | <i>Kabuli</i>           | Portugal                 | Traditional cultivar/Landrace |
| 66      | ICC16811          | <i>Kabuli</i>           | Portugal                 | Traditional cultivar/Landrace |
| 67      | ICC6253           | <i>Kabuli</i>           | Morocco                  | Traditional cultivar/Landrace |
| 68      | ICC11301          | <i>Kabuli</i>           | United States of America | Traditional cultivar/Landrace |
| 69      | ICC10749          | <i>Kabuli</i>           | Turkey                   | Traditional cultivar/Landrace |
| 70      | ICC14216          | <i>Kabuli</i>           | Mexico                   | Breeding/Research material    |
| 71      | ICC14203          | <i>Kabuli</i>           | Mexico                   | Traditional cultivar/Landrace |
| 72      | ICC11742          | <i>Kabuli</i>           | Chile                    | Traditional cultivar/Landrace |
| 73      | ICC13821          | <i>Kabuli</i>           | Ethiopia                 | Traditional cultivar/Landrace |
| 74      | ICC14462          | <i>Kabuli</i>           | India                    | Traditional cultivar/Landrace |
| 75      | ICC14220          | <i>Kabuli</i>           | Kenya                    | Traditional cultivar/Landrace |
| 76      | ICC15944          | <i>Kabuli</i>           | United States of America | Advanced/Improved cultivar    |
| 77      | ICC11303          | <i>Kabuli</i>           | Chile                    | Traditional cultivar/Landrace |
| 78      | ICC12034          | <i>Kabuli</i>           | Mexico                   | Advanced/Improved cultivar    |
| 79      | ICC7346           | <i>Kabuli</i>           | Mexico                   | Breeding/Research material    |
| 80      | ICC15994          | <i>Kabuli</i>           | Spain                    | Traditional cultivar/Landrace |
| 81      | ICC18591          | <i>Kabuli</i>           | Mexico                   | Traditional cultivar/Landrace |
| 82      | ICC8155           | <i>Kabuli</i>           | United States of America | Traditional cultivar/Landrace |
| 83      | ICCV92311         | <i>Kabuli</i>           | India                    | Released Cultivar/Variety     |
| 84      | ICCV95334         | <i>Kabuli</i>           | Central India            | Variety                       |
| 85      | PhuleG0515        | <i>Kabuli</i>           | Central India            | Variety                       |
| 86      | ICCV96329         | <i>Kabuli</i>           | Southern India           | Variety                       |
| 87      | IC296376          | <i>Kabuli</i>           | Northern India           | Variety                       |
| 88      | ICC12968          | <i>Kabuli</i>           | Southern India           | Variety                       |
| 89      | IC449069          | <i>Kabuli</i>           | Northern India           | Variety                       |
| 90      | BGD1105           | <i>Kabuli</i>           | Northern India           | Genetic stock                 |
| 91      | Annigeri          | <i>Kabuli</i>           | India                    | Released Cultivar             |
| 92      | L550              | <i>Kabuli</i>           | India                    | Released Cultivar             |
| 93      | ICC17160          | <i>C. reticulatum</i>   | Turkey                   | Wild                          |
| 94      | ILWC21            | <i>C. reticulatum</i>   | Turkey                   | Wild                          |
| 95      | ICC17159          | <i>C. echinospermum</i> | Turkey                   | Wild                          |
| 96      | IG135418          | <i>C. echinospermum</i> | Syrian Arab Republic     | Wild                          |
| 97      | ICC17150          | <i>C. judaicum</i>      | Lebanon                  | Wild                          |
| 98      | ILWC50            | <i>C. judaicum</i>      | Syrian Arab Republic     | Wild                          |
| 99      | IG136792          | <i>C. bijugum</i>       | Syrian Arab Republic     | Syrian Arab Republic          |
| 100     | ILWC240           | <i>C. bijugum</i>       | Turkey                   | Wild                          |
| 101     | ILWC22            | <i>C. pinnatifidum</i>  | Turkey                   | Wild                          |
| 102     | ILWC261           | <i>C. pinnatifidum</i>  | Syrian Arab Republic     | Wild                          |

**Table S2:** 44844 genome-wide high-quality SNPs identified using reference genome (*desi* and *kabuli*)- and *de novo*-based GBS assay in chickpea

| S.N. | SNP IDs  | Cultivars     | Chromosomes/scaffolds | Physical positions (bp) | SNPs  |
|------|----------|---------------|-----------------------|-------------------------|-------|
| 1    | CakSNP1  | <i>Kabuli</i> | Ca_Kabuli_Chr01       | 523                     | (G/C) |
| 2    | CakSNP2  | <i>Kabuli</i> | Ca_Kabuli_Chr01       | 462                     | (G/C) |
| 3    | CakSNP3  | <i>Kabuli</i> | Ca_Kabuli_Chr01       | 548                     | (G/C) |
| 4    | CakSNP4  | <i>Kabuli</i> | Ca_Kabuli_Chr01       | 578                     | (G/A) |
| 5    | CakSNP5  | <i>Kabuli</i> | Ca_Kabuli_Chr01       | 579                     | (T/C) |
| 6    | CakSNP6  | <i>Kabuli</i> | Ca_Kabuli_Chr01       | 589                     | (A/C) |
| 7    | CakSNP7  | <i>Kabuli</i> | Ca_Kabuli_Chr01       | 627                     | (C/A) |
| 8    | CakSNP8  | <i>Kabuli</i> | Ca_Kabuli_Chr01       | 839                     | (A/T) |
| 9    | CakSNP9  | <i>Kabuli</i> | Ca_Kabuli_Chr01       | 903                     | (G/T) |
| 10   | CakSNP10 | <i>Kabuli</i> | Ca_Kabuli_Chr01       | 927                     | (C/A) |
| 11   | CakSNP11 | <i>Kabuli</i> | Ca_Kabuli_Chr01       | 98930                   | (T/C) |
| 12   | CakSNP12 | <i>Kabuli</i> | Ca_Kabuli_Chr01       | 98992                   | (G/T) |
| 13   | CakSNP13 | <i>Kabuli</i> | Ca_Kabuli_Chr01       | 99242                   | (G/A) |
| 14   | CakSNP14 | <i>Kabuli</i> | Ca_Kabuli_Chr01       | 108882                  | (C/A) |
| 15   | CakSNP15 | <i>Kabuli</i> | Ca_Kabuli_Chr01       | 108984                  | (G/A) |
| 16   | CakSNP16 | <i>Kabuli</i> | Ca_Kabuli_Chr01       | 108979                  | (T/G) |
| 17   | CakSNP17 | <i>Kabuli</i> | Ca_Kabuli_Chr01       | 129394                  | (A/G) |
| 18   | CakSNP18 | <i>Kabuli</i> | Ca_Kabuli_Chr01       | 129401                  | (A/G) |
| 19   | CakSNP19 | <i>Kabuli</i> | Ca_Kabuli_Chr01       | 173669                  | (C/T) |
| 20   | CakSNP20 | <i>Kabuli</i> | Ca_Kabuli_Chr01       | 202954                  | (G/T) |
| 21   | CakSNP21 | <i>Kabuli</i> | Ca_Kabuli_Chr01       | 208244                  | (G/A) |
| 22   | CakSNP22 | <i>Kabuli</i> | Ca_Kabuli_Chr01       | 214979                  | (T/A) |
| 23   | CakSNP23 | <i>Kabuli</i> | Ca_Kabuli_Chr01       | 215066                  | (G/T) |
| 24   | CakSNP24 | <i>Kabuli</i> | Ca_Kabuli_Chr01       | 215058                  | (T/C) |
| 25   | CakSNP25 | <i>Kabuli</i> | Ca_Kabuli_Chr01       | 215053                  | (G/T) |
| 26   | CakSNP26 | <i>Kabuli</i> | Ca_Kabuli_Chr01       | 215048                  | (C/T) |
| 27   | CakSNP27 | <i>Kabuli</i> | Ca_Kabuli_Chr01       | 215029                  | (C/A) |
| 28   | CakSNP28 | <i>Kabuli</i> | Ca_Kabuli_Chr01       | 215027                  | (T/C) |
| 29   | CakSNP29 | <i>Kabuli</i> | Ca_Kabuli_Chr01       | 215006                  | (C/T) |
| 30   | CakSNP30 | <i>Kabuli</i> | Ca_Kabuli_Chr01       | 215239                  | (C/G) |
| 31   | CakSNP31 | <i>Kabuli</i> | Ca_Kabuli_Chr01       | 292962                  | (T/C) |
| 32   | CakSNP32 | <i>Kabuli</i> | Ca_Kabuli_Chr01       | 292972                  | (G/A) |
| 33   | CakSNP33 | <i>Kabuli</i> | Ca_Kabuli_Chr01       | 292998                  | (T/C) |
| 34   | CakSNP34 | <i>Kabuli</i> | Ca_Kabuli_Chr01       | 347620                  | (A/C) |
| 35   | CakSNP35 | <i>Kabuli</i> | Ca_Kabuli_Chr01       | 372530                  | (A/G) |
| 36   | CakSNP36 | <i>Kabuli</i> | Ca_Kabuli_Chr01       | 406570                  | (A/G) |
| 37   | CakSNP37 | <i>Kabuli</i> | Ca_Kabuli_Chr01       | 425149                  | (T/C) |

| <b>S.N.</b> | <b>SNP IDs</b> | <b>Cultivars</b> | <b>Chromosomes/scaffolds</b> | <b>Physical positions (bp)</b> | <b>SNPs</b> |
|-------------|----------------|------------------|------------------------------|--------------------------------|-------------|
| 38          | CakSNP38       | <i>Kabuli</i>    | Ca_Kabuli_Chr01              | 425076                         | (A/G)       |
| 39          | CakSNP39       | <i>Kabuli</i>    | Ca_Kabuli_Chr01              | 435259                         | (A/G)       |
| 40          | CakSNP40       | <i>Kabuli</i>    | Ca_Kabuli_Chr01              | 435274                         | (G/T)       |
| 41          | CakSNP41       | <i>Kabuli</i>    | Ca_Kabuli_Chr01              | 435280                         | (T/C)       |
| 42          | CakSNP42       | <i>Kabuli</i>    | Ca_Kabuli_Chr01              | 435297                         | (G/A)       |
| 43          | CakSNP43       | <i>Kabuli</i>    | Ca_Kabuli_Chr01              | 435304                         | (G/T)       |
| 44          | CakSNP44       | <i>Kabuli</i>    | Ca_Kabuli_Chr01              | 435343                         | (C/A)       |
| 45          | CakSNP45       | <i>Kabuli</i>    | Ca_Kabuli_Chr01              | 435338                         | (T/C)       |
| 46          | CakSNP46       | <i>Kabuli</i>    | Ca_Kabuli_Chr01              | 435264                         | (G/T)       |
| 47          | CakSNP47       | <i>Kabuli</i>    | Ca_Kabuli_Chr01              | 441283                         | (G/A)       |
| 48          | CakSNP48       | <i>Kabuli</i>    | Ca_Kabuli_Chr01              | 441286                         | (C/T)       |
| 49          | CakSNP49       | <i>Kabuli</i>    | Ca_Kabuli_Chr01              | 441288                         | (T/A)       |
| 50          | CakSNP50       | <i>Kabuli</i>    | Ca_Kabuli_Chr01              | 441343                         | (T/A)       |
| 51          | CakSNP51       | <i>Kabuli</i>    | Ca_Kabuli_Chr01              | 446409                         | (T/C)       |
| 52          | CakSNP52       | <i>Kabuli</i>    | Ca_Kabuli_Chr01              | 446443                         | (A/G)       |
| 53          | CakSNP53       | <i>Kabuli</i>    | Ca_Kabuli_Chr01              | 446484                         | (C/T)       |
| 54          | CakSNP54       | <i>Kabuli</i>    | Ca_Kabuli_Chr01              | 446558                         | (G/T)       |
| 55          | CakSNP55       | <i>Kabuli</i>    | Ca_Kabuli_Chr01              | 459968                         | (T/G)       |
| 56          | CakSNP56       | <i>Kabuli</i>    | Ca_Kabuli_Chr01              | 464039                         | (A/C)       |
| 57          | CakSNP57       | <i>Kabuli</i>    | Ca_Kabuli_Chr01              | 464040                         | (G/C)       |
| 58          | CakSNP58       | <i>Kabuli</i>    | Ca_Kabuli_Chr01              | 464043                         | (C/G)       |
| 59          | CakSNP59       | <i>Kabuli</i>    | Ca_Kabuli_Chr01              | 471007                         | (C/T)       |
| 60          | CakSNP60       | <i>Kabuli</i>    | Ca_Kabuli_Chr01              | 471037                         | (C/T)       |
| 61          | CakSNP61       | <i>Kabuli</i>    | Ca_Kabuli_Chr01              | 527271                         | (T/G)       |
| 62          | CakSNP62       | <i>Kabuli</i>    | Ca_Kabuli_Chr01              | 527321                         | (C/T)       |
| 63          | CakSNP63       | <i>Kabuli</i>    | Ca_Kabuli_Chr01              | 554581                         | (G/T)       |
| 64          | CakSNP64       | <i>Kabuli</i>    | Ca_Kabuli_Chr01              | 554677                         | (G/A)       |
| 65          | CakSNP65       | <i>Kabuli</i>    | Ca_Kabuli_Chr01              | 571020                         | (T/G)       |
| 66          | CakSNP66       | <i>Kabuli</i>    | Ca_Kabuli_Chr01              | 591609                         | (T/C)       |
| 67          | CakSNP67       | <i>Kabuli</i>    | Ca_Kabuli_Chr01              | 609709                         | (A/G)       |
| 68          | CakSNP68       | <i>Kabuli</i>    | Ca_Kabuli_Chr01              | 609671                         | (C/T)       |
| 69          | CakSNP69       | <i>Kabuli</i>    | Ca_Kabuli_Chr01              | 609669                         | (C/G)       |
| 70          | CakSNP70       | <i>Kabuli</i>    | Ca_Kabuli_Chr01              | 644318                         | (C/T)       |
| 71          | CakSNP71       | <i>Kabuli</i>    | Ca_Kabuli_Chr01              | 644353                         | (G/A)       |
| 72          | CakSNP72       | <i>Kabuli</i>    | Ca_Kabuli_Chr01              | 644359                         | (T/A)       |
| 73          | CakSNP73       | <i>Kabuli</i>    | Ca_Kabuli_Chr01              | 644440                         | (T/C)       |
| 74          | CakSNP74       | <i>Kabuli</i>    | Ca_Kabuli_Chr01              | 644425                         | (G/A)       |
| 75          | CakSNP75       | <i>Kabuli</i>    | Ca_Kabuli_Chr01              | 661882                         | (A/G)       |

| <b>S.N.</b> | <b>SNP IDs</b> | <b>Cultivars</b> | <b>Chromosomes/scaffolds</b> | <b>Physical positions (bp)</b> | <b>SNPs</b> |
|-------------|----------------|------------------|------------------------------|--------------------------------|-------------|
| 76          | CakSNP76       | <i>Kabuli</i>    | Ca_Kabuli_Chr01              | 662341                         | (A/C)       |
| 77          | CakSNP77       | <i>Kabuli</i>    | Ca_Kabuli_Chr01              | 662489                         | (T/A)       |
| 78          | CakSNP78       | <i>Kabuli</i>    | Ca_Kabuli_Chr01              | 671420                         | (C/A)       |
| 79          | CakSNP79       | <i>Kabuli</i>    | Ca_Kabuli_Chr01              | 671410                         | (T/C)       |
| 80          | CakSNP80       | <i>Kabuli</i>    | Ca_Kabuli_Chr01              | 671391                         | (T/C)       |
| 81          | CakSNP81       | <i>Kabuli</i>    | Ca_Kabuli_Chr01              | 671389                         | (A/G)       |
| 82          | CakSNP82       | <i>Kabuli</i>    | Ca_Kabuli_Chr01              | 671388                         | (A/T)       |
| 83          | CakSNP83       | <i>Kabuli</i>    | Ca_Kabuli_Chr01              | 690156                         | (C/A)       |
| 84          | CakSNP84       | <i>Kabuli</i>    | Ca_Kabuli_Chr01              | 690431                         | (G/A)       |
| 85          | CakSNP85       | <i>Kabuli</i>    | Ca_Kabuli_Chr01              | 691102                         | (A/T)       |
| 86          | CakSNP86       | <i>Kabuli</i>    | Ca_Kabuli_Chr01              | 695962                         | (A/C)       |
| 87          | CakSNP87       | <i>Kabuli</i>    | Ca_Kabuli_Chr01              | 712110                         | (T/C)       |
| 88          | CakSNP88       | <i>Kabuli</i>    | Ca_Kabuli_Chr01              | 712073                         | (C/T)       |
| 89          | CakSNP89       | <i>Kabuli</i>    | Ca_Kabuli_Chr01              | 741514                         | (G/T)       |
| 90          | CakSNP90       | <i>Kabuli</i>    | Ca_Kabuli_Chr01              | 741535                         | (C/T)       |
| 91          | CakSNP91       | <i>Kabuli</i>    | Ca_Kabuli_Chr01              | 741565                         | (T/C)       |
| 92          | CakSNP92       | <i>Kabuli</i>    | Ca_Kabuli_Chr01              | 741549                         | (C/T)       |
| 93          | CakSNP93       | <i>Kabuli</i>    | Ca_Kabuli_Chr01              | 741980                         | (C/G)       |
| 94          | CakSNP94       | <i>Kabuli</i>    | Ca_Kabuli_Chr01              | 742043                         | (G/A)       |
| 95          | CakSNP95       | <i>Kabuli</i>    | Ca_Kabuli_Chr01              | 742026                         | (T/G)       |
| 96          | CakSNP96       | <i>Kabuli</i>    | Ca_Kabuli_Chr01              | 750693                         | (C/T)       |
| 97          | CakSNP97       | <i>Kabuli</i>    | Ca_Kabuli_Chr01              | 777273                         | (C/T)       |
| 98          | CakSNP98       | <i>Kabuli</i>    | Ca_Kabuli_Chr01              | 777240                         | (G/A)       |
| 99          | CakSNP99       | <i>Kabuli</i>    | Ca_Kabuli_Chr01              | 790004                         | (A/C)       |
| 100         | CakSNP100      | <i>Kabuli</i>    | Ca_Kabuli_Chr01              | 790000                         | (C/T)       |
| 101         | CakSNP101      | <i>Kabuli</i>    | Ca_Kabuli_Chr01              | 790102                         | (G/T)       |
| 102         | CakSNP102      | <i>Kabuli</i>    | Ca_Kabuli_Chr01              | 864205                         | (T/C)       |
| 103         | CakSNP103      | <i>Kabuli</i>    | Ca_Kabuli_Chr01              | 864382                         | (T/C)       |
| 104         | CakSNP104      | <i>Kabuli</i>    | Ca_Kabuli_Chr01              | 864381                         | (G/A)       |
| 105         | CakSNP105      | <i>Kabuli</i>    | Ca_Kabuli_Chr01              | 864351                         | (T/C)       |
| 106         | CakSNP106      | <i>Kabuli</i>    | Ca_Kabuli_Chr01              | 866872                         | (T/C)       |
| 107         | CakSNP107      | <i>Kabuli</i>    | Ca_Kabuli_Chr01              | 872443                         | (G/T)       |
| 108         | CakSNP108      | <i>Kabuli</i>    | Ca_Kabuli_Chr01              | 872452                         | (C/T)       |
| 109         | CakSNP109      | <i>Kabuli</i>    | Ca_Kabuli_Chr01              | 876616                         | (T/C)       |
| 110         | CakSNP110      | <i>Kabuli</i>    | Ca_Kabuli_Chr01              | 876633                         | (T/A)       |
| 111         | CakSNP111      | <i>Kabuli</i>    | Ca_Kabuli_Chr01              | 881543                         | (C/A)       |
| 112         | CakSNP112      | <i>Kabuli</i>    | Ca_Kabuli_Chr01              | 881673                         | (G/A)       |
| 113         | CakSNP113      | <i>Kabuli</i>    | Ca_Kabuli_Chr01              | 881703                         | (G/T)       |

| <b>S.N.</b> | <b>SNP IDs</b> | <b>Cultivars</b> | <b>Chromosomes/scaffolds</b> | <b>Physical positions (bp)</b> | <b>SNPs</b> |
|-------------|----------------|------------------|------------------------------|--------------------------------|-------------|
| 114         | CakSNP114      | <i>Kabuli</i>    | Ca_Kabuli_Chr01              | 890949                         | (G/A)       |
| 115         | CakSNP115      | <i>Kabuli</i>    | Ca_Kabuli_Chr01              | 890948                         | (C/T)       |
| 116         | CakSNP116      | <i>Kabuli</i>    | Ca_Kabuli_Chr01              | 910486                         | (T/A)       |
| 117         | CakSNP117      | <i>Kabuli</i>    | Ca_Kabuli_Chr01              | 970315                         | (A/T)       |
| 118         | CakSNP118      | <i>Kabuli</i>    | Ca_Kabuli_Chr01              | 996439                         | (T/C)       |
| 119         | CakSNP119      | <i>Kabuli</i>    | Ca_Kabuli_Chr01              | 1007698                        | (A/G)       |
| 120         | CakSNP120      | <i>Kabuli</i>    | Ca_Kabuli_Chr01              | 1008895                        | (A/G)       |
| 121         | CakSNP121      | <i>Kabuli</i>    | Ca_Kabuli_Chr01              | 1008971                        | (C/G)       |
| 122         | CakSNP122      | <i>Kabuli</i>    | Ca_Kabuli_Chr01              | 1009058                        | (A/C)       |
| 123         | CakSNP123      | <i>Kabuli</i>    | Ca_Kabuli_Chr01              | 1018966                        | (C/G)       |
| 124         | CakSNP124      | <i>Kabuli</i>    | Ca_Kabuli_Chr01              | 1020800                        | (A/G)       |
| 125         | CakSNP125      | <i>Kabuli</i>    | Ca_Kabuli_Chr01              | 1023550                        | (C/T)       |
| 126         | CakSNP126      | <i>Kabuli</i>    | Ca_Kabuli_Chr01              | 1023538                        | (T/C)       |
| 127         | CakSNP127      | <i>Kabuli</i>    | Ca_Kabuli_Chr01              | 1032734                        | (A/T)       |
| 128         | CakSNP128      | <i>Kabuli</i>    | Ca_Kabuli_Chr01              | 1059209                        | (A/G)       |
| 129         | CakSNP129      | <i>Kabuli</i>    | Ca_Kabuli_Chr01              | 1059311                        | (A/G)       |
| 130         | CakSNP130      | <i>Kabuli</i>    | Ca_Kabuli_Chr01              | 1083274                        | (T/C)       |
| 131         | CakSNP131      | <i>Kabuli</i>    | Ca_Kabuli_Chr01              | 1083388                        | (G/A)       |
| 132         | CakSNP132      | <i>Kabuli</i>    | Ca_Kabuli_Chr01              | 1083403                        | (C/T)       |
| 133         | CakSNP133      | <i>Kabuli</i>    | Ca_Kabuli_Chr01              | 1085228                        | (A/C)       |
| 134         | CakSNP134      | <i>Kabuli</i>    | Ca_Kabuli_Chr01              | 1085230                        | (T/G)       |
| 135         | CakSNP135      | <i>Kabuli</i>    | Ca_Kabuli_Chr01              | 1085238                        | (A/G)       |
| 136         | CakSNP136      | <i>Kabuli</i>    | Ca_Kabuli_Chr01              | 1085254                        | (A/C)       |
| 137         | CakSNP137      | <i>Kabuli</i>    | Ca_Kabuli_Chr01              | 1085263                        | (A/C)       |
| 138         | CakSNP138      | <i>Kabuli</i>    | Ca_Kabuli_Chr01              | 1085293                        | (G/A)       |
| 139         | CakSNP139      | <i>Kabuli</i>    | Ca_Kabuli_Chr01              | 1085348                        | (G/A)       |
| 140         | CakSNP140      | <i>Kabuli</i>    | Ca_Kabuli_Chr01              | 1091548                        | (T/A)       |
| 141         | CakSNP141      | <i>Kabuli</i>    | Ca_Kabuli_Chr01              | 1091534                        | (A/C)       |
| 142         | CakSNP142      | <i>Kabuli</i>    | Ca_Kabuli_Chr01              | 1091504                        | (C/T)       |
| 143         | CakSNP143      | <i>Kabuli</i>    | Ca_Kabuli_Chr01              | 1098703                        | (C/G)       |
| 144         | CakSNP144      | <i>Kabuli</i>    | Ca_Kabuli_Chr01              | 1098789                        | (A/G)       |
| 145         | CakSNP145      | <i>Kabuli</i>    | Ca_Kabuli_Chr01              | 1115668                        | (C/T)       |
| 146         | CakSNP146      | <i>Kabuli</i>    | Ca_Kabuli_Chr01              | 1115809                        | (A/G)       |
| 147         | CakSNP147      | <i>Kabuli</i>    | Ca_Kabuli_Chr01              | 1116043                        | (C/T)       |
| 148         | CakSNP148      | <i>Kabuli</i>    | Ca_Kabuli_Chr01              | 1140313                        | (A/C)       |
| 149         | CakSNP149      | <i>Kabuli</i>    | Ca_Kabuli_Chr01              | 1140405                        | (A/T)       |
| 150         | CakSNP150      | <i>Kabuli</i>    | Ca_Kabuli_Chr01              | 1150973                        | (C/T)       |
| 151         | CakSNP151      | <i>Kabuli</i>    | Ca_Kabuli_Chr01              | 1159383                        | (C/A)       |

| <b>S.N.</b> | <b>SNP IDs</b> | <b>Cultivars</b> | <b>Chromosomes/scaffolds</b> | <b>Physical positions (bp)</b> | <b>SNPs</b> |
|-------------|----------------|------------------|------------------------------|--------------------------------|-------------|
| 152         | CakSNP152      | <i>Kabuli</i>    | Ca_Kabuli_Chr01              | 1159411                        | (T/G)       |
| 153         | CakSNP153      | <i>Kabuli</i>    | Ca_Kabuli_Chr01              | 1215024                        | (T/C)       |
| 154         | CakSNP154      | <i>Kabuli</i>    | Ca_Kabuli_Chr01              | 1269212                        | (C/G)       |
| 155         | CakSNP155      | <i>Kabuli</i>    | Ca_Kabuli_Chr01              | 1269180                        | (C/A)       |
| 156         | CakSNP156      | <i>Kabuli</i>    | Ca_Kabuli_Chr01              | 1278884                        | (G/T)       |
| 157         | CakSNP157      | <i>Kabuli</i>    | Ca_Kabuli_Chr01              | 1278997                        | (T/A)       |
| 158         | CakSNP158      | <i>Kabuli</i>    | Ca_Kabuli_Chr01              | 1295527                        | (T/G)       |
| 159         | CakSNP159      | <i>Kabuli</i>    | Ca_Kabuli_Chr01              | 1335518                        | (A/C)       |
| 160         | CakSNP160      | <i>Kabuli</i>    | Ca_Kabuli_Chr01              | 1385553                        | (C/A)       |
| 161         | CakSNP161      | <i>Kabuli</i>    | Ca_Kabuli_Chr01              | 1385554                        | (G/T)       |
| 162         | CakSNP162      | <i>Kabuli</i>    | Ca_Kabuli_Chr01              | 1390073                        | (A/G)       |
| 163         | CakSNP163      | <i>Kabuli</i>    | Ca_Kabuli_Chr01              | 1411348                        | (C/T)       |
| 164         | CakSNP164      | <i>Kabuli</i>    | Ca_Kabuli_Chr01              | 1411351                        | (A/C)       |
| 165         | CakSNP165      | <i>Kabuli</i>    | Ca_Kabuli_Chr01              | 1411501                        | (C/T)       |
| 166         | CakSNP166      | <i>Kabuli</i>    | Ca_Kabuli_Chr01              | 1411498                        | (T/A)       |
| 167         | CakSNP167      | <i>Kabuli</i>    | Ca_Kabuli_Chr01              | 1411495                        | (A/G)       |
| 168         | CakSNP168      | <i>Kabuli</i>    | Ca_Kabuli_Chr01              | 1411490                        | (T/C)       |
| 169         | CakSNP169      | <i>Kabuli</i>    | Ca_Kabuli_Chr01              | 1428222                        | (C/G)       |
| 170         | CakSNP170      | <i>Kabuli</i>    | Ca_Kabuli_Chr01              | 1428251                        | (T/G)       |
| 171         | CakSNP171      | <i>Kabuli</i>    | Ca_Kabuli_Chr01              | 1428264                        | (T/G)       |
| 172         | CakSNP172      | <i>Kabuli</i>    | Ca_Kabuli_Chr01              | 1434121                        | (A/G)       |
| 173         | CakSNP173      | <i>Kabuli</i>    | Ca_Kabuli_Chr01              | 1434883                        | (A/G)       |
| 174         | CakSNP174      | <i>Kabuli</i>    | Ca_Kabuli_Chr01              | 1434875                        | (A/G)       |
| 175         | CakSNP175      | <i>Kabuli</i>    | Ca_Kabuli_Chr01              | 1449848                        | (G/A)       |
| 176         | CakSNP176      | <i>Kabuli</i>    | Ca_Kabuli_Chr01              | 1449913                        | (T/G)       |
| 177         | CakSNP177      | <i>Kabuli</i>    | Ca_Kabuli_Chr01              | 1449949                        | (G/A)       |
| 178         | CakSNP178      | <i>Kabuli</i>    | Ca_Kabuli_Chr01              | 1449980                        | (A/G)       |
| 179         | CakSNP179      | <i>Kabuli</i>    | Ca_Kabuli_Chr01              | 1461574                        | (T/A)       |
| 180         | CakSNP180      | <i>Kabuli</i>    | Ca_Kabuli_Chr01              | 1461600                        | (T/C)       |
| 181         | CakSNP181      | <i>Kabuli</i>    | Ca_Kabuli_Chr01              | 1467056                        | (A/G)       |
| 182         | CakSNP182      | <i>Kabuli</i>    | Ca_Kabuli_Chr01              | 1527513                        | (A/G)       |
| 183         | CakSNP183      | <i>Kabuli</i>    | Ca_Kabuli_Chr01              | 1528325                        | (G/A)       |
| 184         | CakSNP184      | <i>Kabuli</i>    | Ca_Kabuli_Chr01              | 1533723                        | (G/A)       |
| 185         | CakSNP185      | <i>Kabuli</i>    | Ca_Kabuli_Chr01              | 1546679                        | (G/C)       |
| 186         | CakSNP186      | <i>Kabuli</i>    | Ca_Kabuli_Chr01              | 1599821                        | (A/G)       |
| 187         | CakSNP187      | <i>Kabuli</i>    | Ca_Kabuli_Chr01              | 1654823                        | (C/T)       |
| 188         | CakSNP188      | <i>Kabuli</i>    | Ca_Kabuli_Chr01              | 1654855                        | (A/C)       |
| 189         | CakSNP189      | <i>Kabuli</i>    | Ca_Kabuli_Chr01              | 1655018                        | (G/A)       |

| <b>S.N.</b> | <b>SNP IDs</b> | <b>Cultivars</b> | <b>Chromosomes/scaffolds</b> | <b>Physical positions (bp)</b> | <b>SNPs</b> |
|-------------|----------------|------------------|------------------------------|--------------------------------|-------------|
| 190         | CakSNP190      | <i>Kabuli</i>    | Ca_Kabuli_Chr01              | 1655012                        | (G/T)       |
| 191         | CakSNP191      | <i>Kabuli</i>    | Ca_Kabuli_Chr01              | 1693010                        | (T/A)       |
| 192         | CakSNP192      | <i>Kabuli</i>    | Ca_Kabuli_Chr01              | 1693013                        | (C/T)       |
| 193         | CakSNP193      | <i>Kabuli</i>    | Ca_Kabuli_Chr01              | 1693022                        | (T/C)       |
| 194         | CakSNP194      | <i>Kabuli</i>    | Ca_Kabuli_Chr01              | 1693023                        | (T/C)       |
| 195         | CakSNP195      | <i>Kabuli</i>    | Ca_Kabuli_Chr01              | 1693031                        | (C/A)       |
| 196         | CakSNP196      | <i>Kabuli</i>    | Ca_Kabuli_Chr01              | 1738179                        | (G/C)       |
| 197         | CakSNP197      | <i>Kabuli</i>    | Ca_Kabuli_Chr01              | 1772813                        | (T/C)       |
| 198         | CakSNP198      | <i>Kabuli</i>    | Ca_Kabuli_Chr01              | 1782760                        | (G/A)       |
| 199         | CakSNP199      | <i>Kabuli</i>    | Ca_Kabuli_Chr01              | 1782793                        | (G/T)       |
| 200         | CakSNP200      | <i>Kabuli</i>    | Ca_Kabuli_Chr01              | 1782808                        | (G/C)       |
| 201         | CakSNP201      | <i>Kabuli</i>    | Ca_Kabuli_Chr01              | 1782953                        | (G/A)       |
| 202         | CakSNP202      | <i>Kabuli</i>    | Ca_Kabuli_Chr01              | 1782948                        | (T/C)       |
| 203         | CakSNP203      | <i>Kabuli</i>    | Ca_Kabuli_Chr01              | 1782930                        | (G/A)       |
| 204         | CakSNP204      | <i>Kabuli</i>    | Ca_Kabuli_Chr01              | 1782929                        | (C/T)       |
| 205         | CakSNP205      | <i>Kabuli</i>    | Ca_Kabuli_Chr01              | 1783207                        | (G/A)       |
| 206         | CakSNP206      | <i>Kabuli</i>    | Ca_Kabuli_Chr01              | 1783277                        | (G/A)       |
| 207         | CakSNP207      | <i>Kabuli</i>    | Ca_Kabuli_Chr01              | 1783280                        | (A/C)       |
| 208         | CakSNP208      | <i>Kabuli</i>    | Ca_Kabuli_Chr01              | 1783342                        | (A/T)       |
| 209         | CakSNP209      | <i>Kabuli</i>    | Ca_Kabuli_Chr01              | 1783923                        | (C/A)       |
| 210         | CakSNP210      | <i>Kabuli</i>    | Ca_Kabuli_Chr01              | 1784006                        | (T/C)       |
| 211         | CakSNP211      | <i>Kabuli</i>    | Ca_Kabuli_Chr01              | 1788958                        | (T/A)       |
| 212         | CakSNP212      | <i>Kabuli</i>    | Ca_Kabuli_Chr01              | 1789087                        | (T/C)       |
| 213         | CakSNP213      | <i>Kabuli</i>    | Ca_Kabuli_Chr01              | 1802992                        | (C/G)       |
| 214         | CakSNP214      | <i>Kabuli</i>    | Ca_Kabuli_Chr01              | 1858073                        | (C/T)       |
| 215         | CakSNP215      | <i>Kabuli</i>    | Ca_Kabuli_Chr01              | 1858078                        | (T/C)       |
| 216         | CakSNP216      | <i>Kabuli</i>    | Ca_Kabuli_Chr01              | 1858084                        | (C/T)       |
| 217         | CakSNP217      | <i>Kabuli</i>    | Ca_Kabuli_Chr01              | 1858132                        | (T/A)       |
| 218         | CakSNP218      | <i>Kabuli</i>    | Ca_Kabuli_Chr01              | 1858156                        | (C/T)       |
| 219         | CakSNP219      | <i>Kabuli</i>    | Ca_Kabuli_Chr01              | 1858177                        | (T/C)       |
| 220         | CakSNP220      | <i>Kabuli</i>    | Ca_Kabuli_Chr01              | 1858159                        | (A/G)       |
| 221         | CakSNP221      | <i>Kabuli</i>    | Ca_Kabuli_Chr01              | 1858509                        | (C/T)       |
| 222         | CakSNP222      | <i>Kabuli</i>    | Ca_Kabuli_Chr01              | 1858608                        | (T/A)       |
| 223         | CakSNP223      | <i>Kabuli</i>    | Ca_Kabuli_Chr01              | 1858600                        | (G/A)       |
| 224         | CakSNP224      | <i>Kabuli</i>    | Ca_Kabuli_Chr01              | 1859789                        | (C/T)       |
| 225         | CakSNP225      | <i>Kabuli</i>    | Ca_Kabuli_Chr01              | 1859857                        | (A/G)       |
| 226         | CakSNP226      | <i>Kabuli</i>    | Ca_Kabuli_Chr01              | 1859914                        | (G/A)       |
| 227         | CakSNP227      | <i>Kabuli</i>    | Ca_Kabuli_Chr01              | 1859902                        | (G/A)       |



| <b>S.N.</b> | <b>SNP IDs</b> | <b>Cultivars</b> | <b>Chromosomes/scaffolds</b> | <b>Physical positions (bp)</b> | <b>SNPs</b> |
|-------------|----------------|------------------|------------------------------|--------------------------------|-------------|
| 228         | CakSNP228      | <i>Kabuli</i>    | Ca_Kabuli_Chr01              | 1861696                        | (C/T)       |
| 229         | CakSNP229      | <i>Kabuli</i>    | Ca_Kabuli_Chr01              | 1861707                        | (T/G)       |
| 230         | CakSNP230      | <i>Kabuli</i>    | Ca_Kabuli_Chr01              | 1861722                        | (T/A)       |
| 231         | CakSNP231      | <i>Kabuli</i>    | Ca_Kabuli_Chr01              | 1861729                        | (T/C)       |
| 232         | CakSNP232      | <i>Kabuli</i>    | Ca_Kabuli_Chr01              | 1861837                        | (T/G)       |
| 233         | CakSNP233      | <i>Kabuli</i>    | Ca_Kabuli_Chr01              | 1904233                        | (T/C)       |
| 234         | CakSNP234      | <i>Kabuli</i>    | Ca_Kabuli_Chr01              | 1904230                        | (G/T)       |
| 235         | CakSNP235      | <i>Kabuli</i>    | Ca_Kabuli_Chr01              | 1904365                        | (G/A)       |
| 236         | CakSNP236      | <i>Kabuli</i>    | Ca_Kabuli_Chr01              | 1904391                        | (A/G)       |
| 237         | CakSNP237      | <i>Kabuli</i>    | Ca_Kabuli_Chr01              | 1935729                        | (A/G)       |
| 238         | CakSNP238      | <i>Kabuli</i>    | Ca_Kabuli_Chr01              | 1962876                        | (A/G)       |
| 239         | CakSNP239      | <i>Kabuli</i>    | Ca_Kabuli_Chr01              | 1968828                        | (G/A)       |
| 240         | CakSNP240      | <i>Kabuli</i>    | Ca_Kabuli_Chr01              | 2002844                        | (G/A)       |
| 241         | CakSNP241      | <i>Kabuli</i>    | Ca_Kabuli_Chr01              | 2002922                        | (G/T)       |
| 242         | CakSNP242      | <i>Kabuli</i>    | Ca_Kabuli_Chr01              | 2040943                        | (C/T)       |
| 243         | CakSNP243      | <i>Kabuli</i>    | Ca_Kabuli_Chr01              | 2040946                        | (G/T)       |
| 244         | CakSNP244      | <i>Kabuli</i>    | Ca_Kabuli_Chr01              | 2041027                        | (C/G)       |
| 245         | CakSNP245      | <i>Kabuli</i>    | Ca_Kabuli_Chr01              | 2041190                        | (A/C)       |
| 246         | CakSNP246      | <i>Kabuli</i>    | Ca_Kabuli_Chr01              | 2041180                        | (T/C)       |
| 247         | CakSNP247      | <i>Kabuli</i>    | Ca_Kabuli_Chr01              | 2041178                        | (A/C)       |
| 248         | CakSNP248      | <i>Kabuli</i>    | Ca_Kabuli_Chr01              | 2041174                        | (C/T)       |
| 249         | CakSNP249      | <i>Kabuli</i>    | Ca_Kabuli_Chr01              | 2041154                        | (G/C)       |
| 250         | CakSNP250      | <i>Kabuli</i>    | Ca_Kabuli_Chr01              | 2041132                        | (C/T)       |
| 251         | CakSNP251      | <i>Kabuli</i>    | Ca_Kabuli_Chr01              | 2042071                        | (C/G)       |
| 252         | CakSNP252      | <i>Kabuli</i>    | Ca_Kabuli_Chr01              | 2042185                        | (T/C)       |
| 253         | CakSNP253      | <i>Kabuli</i>    | Ca_Kabuli_Chr01              | 2042152                        | (G/C)       |
| 254         | CakSNP254      | <i>Kabuli</i>    | Ca_Kabuli_Chr01              | 2042149                        | (G/T)       |
| 255         | CakSNP255      | <i>Kabuli</i>    | Ca_Kabuli_Chr01              | 2044338                        | (G/A)       |
| 256         | CakSNP256      | <i>Kabuli</i>    | Ca_Kabuli_Chr01              | 2044304                        | (A/C)       |
| 257         | CakSNP257      | <i>Kabuli</i>    | Ca_Kabuli_Chr01              | 2044289                        | (A/G)       |
| 258         | CakSNP258      | <i>Kabuli</i>    | Ca_Kabuli_Chr01              | 2044263                        | (A/C)       |
| 259         | CakSNP259      | <i>Kabuli</i>    | Ca_Kabuli_Chr01              | 2044359                        | (C/T)       |
| 260         | CakSNP260      | <i>Kabuli</i>    | Ca_Kabuli_Chr01              | 2044374                        | (C/G)       |
| 261         | CakSNP261      | <i>Kabuli</i>    | Ca_Kabuli_Chr01              | 2044380                        | (G/C)       |
| 262         | CakSNP262      | <i>Kabuli</i>    | Ca_Kabuli_Chr01              | 2044408                        | (A/C)       |
| 263         | CakSNP263      | <i>Kabuli</i>    | Ca_Kabuli_Chr01              | 2044414                        | (G/A)       |
| 264         | CakSNP264      | <i>Kabuli</i>    | Ca_Kabuli_Chr01              | 2044474                        | (A/G)       |
| 265         | CakSNP265      | <i>Kabuli</i>    | Ca_Kabuli_Chr01              | 2050232                        | (A/T)       |

| <b>S.N.</b> | <b>SNP IDs</b> | <b>Cultivars</b> | <b>Chromosomes/scaffolds</b> | <b>Physical positions (bp)</b> | <b>SNPs</b> |
|-------------|----------------|------------------|------------------------------|--------------------------------|-------------|
| 266         | CakSNP266      | <i>Kabuli</i>    | Ca_Kabuli_Chr01              | 2050187                        | (C/G)       |
| 267         | CakSNP267      | <i>Kabuli</i>    | Ca_Kabuli_Chr01              | 2050479                        | (A/C)       |
| 268         | CakSNP268      | <i>Kabuli</i>    | Ca_Kabuli_Chr01              | 2050469                        | (T/C)       |
| 269         | CakSNP269      | <i>Kabuli</i>    | Ca_Kabuli_Chr01              | 2050467                        | (A/C)       |
| 270         | CakSNP270      | <i>Kabuli</i>    | Ca_Kabuli_Chr01              | 2050465                        | (A/G)       |
| 271         | CakSNP271      | <i>Kabuli</i>    | Ca_Kabuli_Chr01              | 2050463                        | (C/T)       |
| 272         | CakSNP272      | <i>Kabuli</i>    | Ca_Kabuli_Chr01              | 2050443                        | (G/C)       |
| 273         | CakSNP273      | <i>Kabuli</i>    | Ca_Kabuli_Chr01              | 2050421                        | (C/T)       |
| 274         | CakSNP274      | <i>Kabuli</i>    | Ca_Kabuli_Chr01              | 2051360                        | (A/G)       |
| 275         | CakSNP275      | <i>Kabuli</i>    | Ca_Kabuli_Chr01              | 2051375                        | (G/T)       |
| 276         | CakSNP276      | <i>Kabuli</i>    | Ca_Kabuli_Chr01              | 2051379                        | (C/T)       |
| 277         | CakSNP277      | <i>Kabuli</i>    | Ca_Kabuli_Chr01              | 2053732                        | (C/T)       |
| 278         | CakSNP278      | <i>Kabuli</i>    | Ca_Kabuli_Chr01              | 2053744                        | (C/A)       |
| 279         | CakSNP279      | <i>Kabuli</i>    | Ca_Kabuli_Chr01              | 2053749                        | (T/A)       |
| 280         | CakSNP280      | <i>Kabuli</i>    | Ca_Kabuli_Chr01              | 2053756                        | (G/T)       |
| 281         | CakSNP281      | <i>Kabuli</i>    | Ca_Kabuli_Chr01              | 2053757                        | (C/T)       |
| 282         | CakSNP282      | <i>Kabuli</i>    | Ca_Kabuli_Chr01              | 2053758                        | (A/G)       |
| 283         | CakSNP283      | <i>Kabuli</i>    | Ca_Kabuli_Chr01              | 2053784                        | (C/A)       |
| 284         | CakSNP284      | <i>Kabuli</i>    | Ca_Kabuli_Chr01              | 2053788                        | (A/G)       |
| 285         | CakSNP285      | <i>Kabuli</i>    | Ca_Kabuli_Chr01              | 2053790                        | (G/A)       |
| 286         | CakSNP286      | <i>Kabuli</i>    | Ca_Kabuli_Chr01              | 2053808                        | (G/T)       |
| 287         | CakSNP287      | <i>Kabuli</i>    | Ca_Kabuli_Chr01              | 2053856                        | (T/G)       |
| 288         | CakSNP288      | <i>Kabuli</i>    | Ca_Kabuli_Chr01              | 2053843                        | (T/A)       |
| 289         | CakSNP289      | <i>Kabuli</i>    | Ca_Kabuli_Chr01              | 2053841                        | (C/A)       |
| 290         | CakSNP290      | <i>Kabuli</i>    | Ca_Kabuli_Chr01              | 2053840                        | (A/C)       |
| 291         | CakSNP291      | <i>Kabuli</i>    | Ca_Kabuli_Chr01              | 2053833                        | (T/G)       |
| 292         | CakSNP292      | <i>Kabuli</i>    | Ca_Kabuli_Chr01              | 2053830                        | (A/G)       |
| 293         | CakSNP293      | <i>Kabuli</i>    | Ca_Kabuli_Chr01              | 2053819                        | (C/A)       |
| 294         | CakSNP294      | <i>Kabuli</i>    | Ca_Kabuli_Chr01              | 2053818                        | (G/C)       |
| 295         | CakSNP295      | <i>Kabuli</i>    | Ca_Kabuli_Chr01              | 2071456                        | (T/A)       |
| 296         | CakSNP296      | <i>Kabuli</i>    | Ca_Kabuli_Chr01              | 2071448                        | (A/T)       |
| 297         | CakSNP297      | <i>Kabuli</i>    | Ca_Kabuli_Chr01              | 2071424                        | (T/A)       |
| 298         | CakSNP298      | <i>Kabuli</i>    | Ca_Kabuli_Chr01              | 2071708                        | (C/G)       |
| 299         | CakSNP299      | <i>Kabuli</i>    | Ca_Kabuli_Chr01              | 2071703                        | (A/C)       |
| 300         | CakSNP300      | <i>Kabuli</i>    | Ca_Kabuli_Chr01              | 2071699                        | (T/C)       |
| 301         | CakSNP301      | <i>Kabuli</i>    | Ca_Kabuli_Chr01              | 2071693                        | (T/C)       |
| 302         | CakSNP302      | <i>Kabuli</i>    | Ca_Kabuli_Chr01              | 2071691                        | (A/C)       |
| 303         | CakSNP303      | <i>Kabuli</i>    | Ca_Kabuli_Chr01              | 2071689                        | (A/G)       |

| <b>S.N.</b> | <b>SNP IDs</b> | <b>Cultivars</b> | <b>Chromosomes/scaffolds</b> | <b>Physical positions (bp)</b> | <b>SNPs</b> |
|-------------|----------------|------------------|------------------------------|--------------------------------|-------------|
| 304         | CakSNP304      | <i>Kabuli</i>    | Ca_Kabuli_Chr01              | 2071687                        | (C/T)       |
| 305         | CakSNP305      | <i>Kabuli</i>    | Ca_Kabuli_Chr01              | 2071667                        | (G/C)       |
| 306         | CakSNP306      | <i>Kabuli</i>    | Ca_Kabuli_Chr01              | 2071645                        | (C/T)       |
| 307         | CakSNP307      | <i>Kabuli</i>    | Ca_Kabuli_Chr01              | 2072613                        | (G/A)       |
| 308         | CakSNP308      | <i>Kabuli</i>    | Ca_Kabuli_Chr01              | 2072627                        | (A/T)       |
| 309         | CakSNP309      | <i>Kabuli</i>    | Ca_Kabuli_Chr01              | 2074998                        | (A/C)       |
| 310         | CakSNP310      | <i>Kabuli</i>    | Ca_Kabuli_Chr01              | 2075087                        | (A/T)       |
| 311         | CakSNP311      | <i>Kabuli</i>    | Ca_Kabuli_Chr01              | 2075057                        | (G/T)       |
| 312         | CakSNP312      | <i>Kabuli</i>    | Ca_Kabuli_Chr01              | 2075045                        | (C/A)       |
| 313         | CakSNP313      | <i>Kabuli</i>    | Ca_Kabuli_Chr01              | 2075044                        | (A/G)       |
| 314         | CakSNP314      | <i>Kabuli</i>    | Ca_Kabuli_Chr01              | 2075043                        | (C/A)       |
| 315         | CakSNP315      | <i>Kabuli</i>    | Ca_Kabuli_Chr01              | 2075015                        | (G/A)       |
| 316         | CakSNP316      | <i>Kabuli</i>    | Ca_Kabuli_Chr01              | 2075013                        | (A/G)       |
| 317         | CakSNP317      | <i>Kabuli</i>    | Ca_Kabuli_Chr01              | 2075009                        | (C/A)       |
| 318         | CakSNP318      | <i>Kabuli</i>    | Ca_Kabuli_Chr01              | 2082760                        | (C/G)       |
| 319         | CakSNP319      | <i>Kabuli</i>    | Ca_Kabuli_Chr01              | 2082801                        | (G/A)       |
| 320         | CakSNP320      | <i>Kabuli</i>    | Ca_Kabuli_Chr01              | 2083003                        | (G/C)       |
| 321         | CakSNP321      | <i>Kabuli</i>    | Ca_Kabuli_Chr01              | 2083059                        | (A/T)       |
| 322         | CakSNP322      | <i>Kabuli</i>    | Ca_Kabuli_Chr01              | 2126267                        | (G/A)       |
| 323         | CakSNP323      | <i>Kabuli</i>    | Ca_Kabuli_Chr01              | 2148583                        | (T/G)       |
| 324         | CakSNP324      | <i>Kabuli</i>    | Ca_Kabuli_Chr01              | 2170090                        | (G/C)       |
| 325         | CakSNP325      | <i>Kabuli</i>    | Ca_Kabuli_Chr01              | 2170935                        | (A/C)       |
| 326         | CakSNP326      | <i>Kabuli</i>    | Ca_Kabuli_Chr01              | 2172076                        | (T/C)       |
| 327         | CakSNP327      | <i>Kabuli</i>    | Ca_Kabuli_Chr01              | 2172113                        | (G/A)       |
| 328         | CakSNP328      | <i>Kabuli</i>    | Ca_Kabuli_Chr01              | 2172143                        | (T/G)       |
| 329         | CakSNP329      | <i>Kabuli</i>    | Ca_Kabuli_Chr01              | 2172149                        | (G/A)       |
| 330         | CakSNP330      | <i>Kabuli</i>    | Ca_Kabuli_Chr01              | 2183544                        | (A/G)       |
| 331         | CakSNP331      | <i>Kabuli</i>    | Ca_Kabuli_Chr01              | 2188472                        | (T/C)       |
| 332         | CakSNP332      | <i>Kabuli</i>    | Ca_Kabuli_Chr01              | 2232724                        | (A/G)       |
| 333         | CakSNP333      | <i>Kabuli</i>    | Ca_Kabuli_Chr01              | 2232764                        | (C/T)       |
| 334         | CakSNP334      | <i>Kabuli</i>    | Ca_Kabuli_Chr01              | 2232779                        | (A/G)       |
| 335         | CakSNP335      | <i>Kabuli</i>    | Ca_Kabuli_Chr01              | 2252270                        | (C/T)       |
| 336         | CakSNP336      | <i>Kabuli</i>    | Ca_Kabuli_Chr01              | 2252320                        | (G/T)       |
| 337         | CakSNP337      | <i>Kabuli</i>    | Ca_Kabuli_Chr01              | 2252328                        | (C/A)       |
| 338         | CakSNP338      | <i>Kabuli</i>    | Ca_Kabuli_Chr01              | 2252342                        | (C/T)       |
| 339         | CakSNP339      | <i>Kabuli</i>    | Ca_Kabuli_Chr01              | 2252343                        | (G/T)       |
| 340         | CakSNP340      | <i>Kabuli</i>    | Ca_Kabuli_Chr01              | 2252463                        | (T/C)       |
| 341         | CakSNP341      | <i>Kabuli</i>    | Ca_Kabuli_Chr01              | 2252401                        | (A/G)       |

| <b>S.N.</b> | <b>SNP IDs</b> | <b>Cultivars</b> | <b>Chromosomes/scaffolds</b> | <b>Physical positions (bp)</b> | <b>SNPs</b> |
|-------------|----------------|------------------|------------------------------|--------------------------------|-------------|
| 342         | CakSNP342      | <i>Kabuli</i>    | Ca_Kabuli_Chr01              | 2252496                        | (C/A)       |
| 343         | CakSNP343      | <i>Kabuli</i>    | Ca_Kabuli_Chr01              | 2252513                        | (C/T)       |
| 344         | CakSNP344      | <i>Kabuli</i>    | Ca_Kabuli_Chr01              | 2269319                        | (T/G)       |
| 345         | CakSNP345      | <i>Kabuli</i>    | Ca_Kabuli_Chr01              | 2269489                        | (A/C)       |
| 346         | CakSNP346      | <i>Kabuli</i>    | Ca_Kabuli_Chr01              | 2277459                        | (G/A)       |
| 347         | CakSNP347      | <i>Kabuli</i>    | Ca_Kabuli_Chr01              | 2285879                        | (G/A)       |
| 348         | CakSNP348      | <i>Kabuli</i>    | Ca_Kabuli_Chr01              | 2287408                        | (A/T)       |
| 349         | CakSNP349      | <i>Kabuli</i>    | Ca_Kabuli_Chr01              | 2287478                        | (A/T)       |
| 350         | CakSNP350      | <i>Kabuli</i>    | Ca_Kabuli_Chr01              | 2366413                        | (T/C)       |
| 351         | CakSNP351      | <i>Kabuli</i>    | Ca_Kabuli_Chr01              | 2366409                        | (T/A)       |
| 352         | CakSNP352      | <i>Kabuli</i>    | Ca_Kabuli_Chr01              | 2373166                        | (A/G)       |
| 353         | CakSNP353      | <i>Kabuli</i>    | Ca_Kabuli_Chr01              | 2373862                        | (G/A)       |
| 354         | CakSNP354      | <i>Kabuli</i>    | Ca_Kabuli_Chr01              | 2373910                        | (C/T)       |
| 355         | CakSNP355      | <i>Kabuli</i>    | Ca_Kabuli_Chr01              | 2373954                        | (G/T)       |
| 356         | CakSNP356      | <i>Kabuli</i>    | Ca_Kabuli_Chr01              | 2395842                        | (A/C)       |
| 357         | CakSNP357      | <i>Kabuli</i>    | Ca_Kabuli_Chr01              | 2400799                        | (T/G)       |
| 358         | CakSNP358      | <i>Kabuli</i>    | Ca_Kabuli_Chr01              | 2400892                        | (C/T)       |
| 359         | CakSNP359      | <i>Kabuli</i>    | Ca_Kabuli_Chr01              | 2428531                        | (A/G)       |
| 360         | CakSNP360      | <i>Kabuli</i>    | Ca_Kabuli_Chr01              | 2439915                        | (A/G)       |
| 361         | CakSNP361      | <i>Kabuli</i>    | Ca_Kabuli_Chr01              | 2439917                        | (G/A)       |
| 362         | CakSNP362      | <i>Kabuli</i>    | Ca_Kabuli_Chr01              | 2473309                        | (T/C)       |
| 363         | CakSNP363      | <i>Kabuli</i>    | Ca_Kabuli_Chr01              | 2513476                        | (T/A)       |
| 364         | CakSNP364      | <i>Kabuli</i>    | Ca_Kabuli_Chr01              | 2513516                        | (T/A)       |
| 365         | CakSNP365      | <i>Kabuli</i>    | Ca_Kabuli_Chr01              | 2513535                        | (T/C)       |
| 366         | CakSNP366      | <i>Kabuli</i>    | Ca_Kabuli_Chr01              | 2513737                        | (T/C)       |
| 367         | CakSNP367      | <i>Kabuli</i>    | Ca_Kabuli_Chr01              | 2513860                        | (G/A)       |
| 368         | CakSNP368      | <i>Kabuli</i>    | Ca_Kabuli_Chr01              | 2513854                        | (G/A)       |
| 369         | CakSNP369      | <i>Kabuli</i>    | Ca_Kabuli_Chr01              | 2513792                        | (A/G)       |
| 370         | CakSNP370      | <i>Kabuli</i>    | Ca_Kabuli_Chr01              | 2513914                        | (T/C)       |
| 371         | CakSNP371      | <i>Kabuli</i>    | Ca_Kabuli_Chr01              | 2542652                        | (G/A)       |
| 372         | CakSNP372      | <i>Kabuli</i>    | Ca_Kabuli_Chr01              | 2649822                        | (G/C)       |
| 373         | CakSNP373      | <i>Kabuli</i>    | Ca_Kabuli_Chr01              | 2649864                        | (C/A)       |
| 374         | CakSNP374      | <i>Kabuli</i>    | Ca_Kabuli_Chr01              | 2649921                        | (T/C)       |
| 375         | CakSNP375      | <i>Kabuli</i>    | Ca_Kabuli_Chr01              | 2649906                        | (C/T)       |
| 376         | CakSNP376      | <i>Kabuli</i>    | Ca_Kabuli_Chr01              | 2649974                        | (A/C)       |
| 377         | CakSNP377      | <i>Kabuli</i>    | Ca_Kabuli_Chr01              | 2671403                        | (G/T)       |
| 378         | CakSNP378      | <i>Kabuli</i>    | Ca_Kabuli_Chr01              | 2694584                        | (T/C)       |
| 379         | CakSNP379      | <i>Kabuli</i>    | Ca_Kabuli_Chr01              | 2745499                        | (C/A)       |

| <b>S.N.</b> | <b>SNP IDs</b> | <b>Cultivars</b> | <b>Chromosomes/scaffolds</b> | <b>Physical positions (bp)</b> | <b>SNPs</b> |
|-------------|----------------|------------------|------------------------------|--------------------------------|-------------|
| 380         | CakSNP380      | <i>Kabuli</i>    | Ca_Kabuli_Chr01              | 2745514                        | (A/C)       |
| 381         | CakSNP381      | <i>Kabuli</i>    | Ca_Kabuli_Chr01              | 2745519                        | (G/C)       |
| 382         | CakSNP382      | <i>Kabuli</i>    | Ca_Kabuli_Chr01              | 2745486                        | (C/T)       |
| 383         | CakSNP383      | <i>Kabuli</i>    | Ca_Kabuli_Chr01              | 2754998                        | (C/T)       |
| 384         | CakSNP384      | <i>Kabuli</i>    | Ca_Kabuli_Chr01              | 2755012                        | (C/T)       |
| 385         | CakSNP385      | <i>Kabuli</i>    | Ca_Kabuli_Chr01              | 2755013                        | (T/A)       |
| 386         | CakSNP386      | <i>Kabuli</i>    | Ca_Kabuli_Chr01              | 2755015                        | (T/C)       |
| 387         | CakSNP387      | <i>Kabuli</i>    | Ca_Kabuli_Chr01              | 2755443                        | (T/A)       |
| 388         | CakSNP388      | <i>Kabuli</i>    | Ca_Kabuli_Chr01              | 2755455                        | (G/A)       |
| 389         | CakSNP389      | <i>Kabuli</i>    | Ca_Kabuli_Chr01              | 2755457                        | (C/T)       |
| 390         | CakSNP390      | <i>Kabuli</i>    | Ca_Kabuli_Chr01              | 2755459                        | (T/G)       |
| 391         | CakSNP391      | <i>Kabuli</i>    | Ca_Kabuli_Chr01              | 2755465                        | (T/A)       |
| 392         | CakSNP392      | <i>Kabuli</i>    | Ca_Kabuli_Chr01              | 2755466                        | (C/G)       |
| 393         | CakSNP393      | <i>Kabuli</i>    | Ca_Kabuli_Chr01              | 2755470                        | (A/T)       |
| 394         | CakSNP394      | <i>Kabuli</i>    | Ca_Kabuli_Chr01              | 2755471                        | (C/A)       |
| 395         | CakSNP395      | <i>Kabuli</i>    | Ca_Kabuli_Chr01              | 2755489                        | (G/A)       |
| 396         | CakSNP396      | <i>Kabuli</i>    | Ca_Kabuli_Chr01              | 2755494                        | (T/C)       |
| 397         | CakSNP397      | <i>Kabuli</i>    | Ca_Kabuli_Chr01              | 2755496                        | (A/G)       |
| 398         | CakSNP398      | <i>Kabuli</i>    | Ca_Kabuli_Chr01              | 2755613                        | (G/T)       |
| 399         | CakSNP399      | <i>Kabuli</i>    | Ca_Kabuli_Chr01              | 2755604                        | (A/C)       |
| 400         | CakSNP400      | <i>Kabuli</i>    | Ca_Kabuli_Chr01              | 2755596                        | (C/A)       |
| 401         | CakSNP401      | <i>Kabuli</i>    | Ca_Kabuli_Chr01              | 2757711                        | (T/G)       |
| 402         | CakSNP402      | <i>Kabuli</i>    | Ca_Kabuli_Chr01              | 2757696                        | (A/G)       |
| 403         | CakSNP403      | <i>Kabuli</i>    | Ca_Kabuli_Chr01              | 2757693                        | (C/T)       |
| 404         | CakSNP404      | <i>Kabuli</i>    | Ca_Kabuli_Chr01              | 2757678                        | (A/G)       |
| 405         | CakSNP405      | <i>Kabuli</i>    | Ca_Kabuli_Chr01              | 2758781                        | (G/C)       |
| 406         | CakSNP406      | <i>Kabuli</i>    | Ca_Kabuli_Chr01              | 2758759                        | (G/C)       |
| 407         | CakSNP407      | <i>Kabuli</i>    | Ca_Kabuli_Chr01              | 2758750                        | (A/G)       |
| 408         | CakSNP408      | <i>Kabuli</i>    | Ca_Kabuli_Chr01              | 2758746                        | (G/A)       |
| 409         | CakSNP409      | <i>Kabuli</i>    | Ca_Kabuli_Chr01              | 2758739                        | (A/T)       |
| 410         | CakSNP410      | <i>Kabuli</i>    | Ca_Kabuli_Chr01              | 2758738                        | (T/G)       |
| 411         | CakSNP411      | <i>Kabuli</i>    | Ca_Kabuli_Chr01              | 2758859                        | (A/T)       |
| 412         | CakSNP412      | <i>Kabuli</i>    | Ca_Kabuli_Chr01              | 2758835                        | (T/A)       |
| 413         | CakSNP413      | <i>Kabuli</i>    | Ca_Kabuli_Chr01              | 2758827                        | (A/T)       |
| 414         | CakSNP414      | <i>Kabuli</i>    | Ca_Kabuli_Chr01              | 2787006                        | (C/T)       |
| 415         | CakSNP415      | <i>Kabuli</i>    | Ca_Kabuli_Chr01              | 2786994                        | (A/C)       |
| 416         | CakSNP416      | <i>Kabuli</i>    | Ca_Kabuli_Chr01              | 2786989                        | (T/C)       |
| 417         | CakSNP417      | <i>Kabuli</i>    | Ca_Kabuli_Chr01              | 2786976                        | (A/C)       |

| <b>S.N.</b> | <b>SNP IDs</b> | <b>Cultivars</b> | <b>Chromosomes/scaffolds</b> | <b>Physical positions (bp)</b> | <b>SNPs</b> |
|-------------|----------------|------------------|------------------------------|--------------------------------|-------------|
| 418         | CakSNP418      | <i>Kabuli</i>    | Ca_Kabuli_Chr01              | 2786974                        | (T/C)       |
| 419         | CakSNP419      | <i>Kabuli</i>    | Ca_Kabuli_Chr01              | 2786970                        | (T/A)       |
| 420         | CakSNP420      | <i>Kabuli</i>    | Ca_Kabuli_Chr01              | 2807605                        | (G/C)       |
| 421         | CakSNP421      | <i>Kabuli</i>    | Ca_Kabuli_Chr01              | 2807616                        | (G/A)       |
| 422         | CakSNP422      | <i>Kabuli</i>    | Ca_Kabuli_Chr01              | 2808197                        | (T/C)       |
| 423         | CakSNP423      | <i>Kabuli</i>    | Ca_Kabuli_Chr01              | 2808170                        | (T/G)       |
| 424         | CakSNP424      | <i>Kabuli</i>    | Ca_Kabuli_Chr01              | 2832792                        | (G/A)       |
| 425         | CakSNP425      | <i>Kabuli</i>    | Ca_Kabuli_Chr01              | 2832969                        | (G/A)       |
| 426         | CakSNP426      | <i>Kabuli</i>    | Ca_Kabuli_Chr01              | 2832939                        | (G/T)       |
| 427         | CakSNP427      | <i>Kabuli</i>    | Ca_Kabuli_Chr01              | 2833448                        | (C/A)       |
| 428         | CakSNP428      | <i>Kabuli</i>    | Ca_Kabuli_Chr01              | 2855919                        | (T/G)       |
| 429         | CakSNP429      | <i>Kabuli</i>    | Ca_Kabuli_Chr01              | 2855926                        | (T/A)       |
| 430         | CakSNP430      | <i>Kabuli</i>    | Ca_Kabuli_Chr01              | 2855927                        | (T/A)       |
| 431         | CakSNP431      | <i>Kabuli</i>    | Ca_Kabuli_Chr01              | 2855941                        | (T/G)       |
| 432         | CakSNP432      | <i>Kabuli</i>    | Ca_Kabuli_Chr01              | 2855962                        | (A/G)       |
| 433         | CakSNP433      | <i>Kabuli</i>    | Ca_Kabuli_Chr01              | 2855969                        | (C/T)       |
| 434         | CakSNP434      | <i>Kabuli</i>    | Ca_Kabuli_Chr01              | 2856003                        | (T/C)       |
| 435         | CakSNP435      | <i>Kabuli</i>    | Ca_Kabuli_Chr01              | 2856045                        | (C/T)       |
| 436         | CakSNP436      | <i>Kabuli</i>    | Ca_Kabuli_Chr01              | 2856079                        | (T/G)       |
| 437         | CakSNP437      | <i>Kabuli</i>    | Ca_Kabuli_Chr01              | 2856094                        | (T/G)       |
| 438         | CakSNP438      | <i>Kabuli</i>    | Ca_Kabuli_Chr01              | 2856120                        | (T/G)       |
| 439         | CakSNP439      | <i>Kabuli</i>    | Ca_Kabuli_Chr01              | 2856534                        | (T/A)       |
| 440         | CakSNP440      | <i>Kabuli</i>    | Ca_Kabuli_Chr01              | 2858263                        | (A/G)       |
| 441         | CakSNP441      | <i>Kabuli</i>    | Ca_Kabuli_Chr01              | 2858278                        | (T/A)       |
| 442         | CakSNP442      | <i>Kabuli</i>    | Ca_Kabuli_Chr01              | 2858287                        | (G/T)       |
| 443         | CakSNP443      | <i>Kabuli</i>    | Ca_Kabuli_Chr01              | 2858299                        | (C/A)       |
| 444         | CakSNP444      | <i>Kabuli</i>    | Ca_Kabuli_Chr01              | 2868942                        | (G/A)       |
| 445         | CakSNP445      | <i>Kabuli</i>    | Ca_Kabuli_Chr01              | 2881315                        | (T/C)       |
| 446         | CakSNP446      | <i>Kabuli</i>    | Ca_Kabuli_Chr01              | 2881321                        | (C/A)       |
| 447         | CakSNP447      | <i>Kabuli</i>    | Ca_Kabuli_Chr01              | 2881323                        | (A/T)       |
| 448         | CakSNP448      | <i>Kabuli</i>    | Ca_Kabuli_Chr01              | 2881327                        | (C/T)       |
| 449         | CakSNP449      | <i>Kabuli</i>    | Ca_Kabuli_Chr01              | 2881356                        | (C/A)       |
| 450         | CakSNP450      | <i>Kabuli</i>    | Ca_Kabuli_Chr01              | 2881357                        | (A/T)       |
| 451         | CakSNP451      | <i>Kabuli</i>    | Ca_Kabuli_Chr01              | 2881422                        | (T/C)       |
| 452         | CakSNP452      | <i>Kabuli</i>    | Ca_Kabuli_Chr01              | 2881389                        | (G/C)       |
| 453         | CakSNP453      | <i>Kabuli</i>    | Ca_Kabuli_Chr01              | 2881386                        | (G/T)       |
| 454         | CakSNP454      | <i>Kabuli</i>    | Ca_Kabuli_Chr01              | 2883625                        | (T/A)       |
| 455         | CakSNP455      | <i>Kabuli</i>    | Ca_Kabuli_Chr01              | 2883634                        | (T/A)       |

| <b>S.N.</b> | <b>SNP IDs</b> | <b>Cultivars</b> | <b>Chromosomes/scaffolds</b> | <b>Physical positions (bp)</b> | <b>SNPs</b> |
|-------------|----------------|------------------|------------------------------|--------------------------------|-------------|
| 456         | CakSNP456      | <i>Kabuli</i>    | Ca_Kabuli_Chr01              | 2883635                        | (A/G)       |
| 457         | CakSNP457      | <i>Kabuli</i>    | Ca_Kabuli_Chr01              | 2883660                        | (C/G)       |
| 458         | CakSNP458      | <i>Kabuli</i>    | Ca_Kabuli_Chr01              | 2883666                        | (G/A)       |
| 459         | CakSNP459      | <i>Kabuli</i>    | Ca_Kabuli_Chr01              | 2883684                        | (G/T)       |
| 460         | CakSNP460      | <i>Kabuli</i>    | Ca_Kabuli_Chr01              | 2883717                        | (C/A)       |
| 461         | CakSNP461      | <i>Kabuli</i>    | Ca_Kabuli_Chr01              | 2883716                        | (A/C)       |
| 462         | CakSNP462      | <i>Kabuli</i>    | Ca_Kabuli_Chr01              | 2883709                        | (A/G)       |
| 463         | CakSNP463      | <i>Kabuli</i>    | Ca_Kabuli_Chr01              | 2885508                        | (T/C)       |
| 464         | CakSNP464      | <i>Kabuli</i>    | Ca_Kabuli_Chr01              | 2885525                        | (T/C)       |
| 465         | CakSNP465      | <i>Kabuli</i>    | Ca_Kabuli_Chr01              | 2885531                        | (C/T)       |
| 466         | CakSNP466      | <i>Kabuli</i>    | Ca_Kabuli_Chr01              | 2885626                        | (A/G)       |
| 467         | CakSNP467      | <i>Kabuli</i>    | Ca_Kabuli_Chr01              | 2885673                        | (G/C)       |
| 468         | CakSNP468      | <i>Kabuli</i>    | Ca_Kabuli_Chr01              | 2885892                        | (T/A)       |
| 469         | CakSNP469      | <i>Kabuli</i>    | Ca_Kabuli_Chr01              | 2885906                        | (C/T)       |
| 470         | CakSNP470      | <i>Kabuli</i>    | Ca_Kabuli_Chr01              | 2885923                        | (C/G)       |
| 471         | CakSNP471      | <i>Kabuli</i>    | Ca_Kabuli_Chr01              | 2886025                        | (A/G)       |
| 472         | CakSNP472      | <i>Kabuli</i>    | Ca_Kabuli_Chr01              | 2886020                        | (G/T)       |
| 473         | CakSNP473      | <i>Kabuli</i>    | Ca_Kabuli_Chr01              | 2886015                        | (G/A)       |
| 474         | CakSNP474      | <i>Kabuli</i>    | Ca_Kabuli_Chr01              | 2886005                        | (G/A)       |
| 475         | CakSNP475      | <i>Kabuli</i>    | Ca_Kabuli_Chr01              | 2885997                        | (G/A)       |
| 476         | CakSNP476      | <i>Kabuli</i>    | Ca_Kabuli_Chr01              | 2885988                        | (C/G)       |
| 477         | CakSNP477      | <i>Kabuli</i>    | Ca_Kabuli_Chr01              | 2885987                        | (T/A)       |
| 478         | CakSNP478      | <i>Kabuli</i>    | Ca_Kabuli_Chr01              | 2948211                        | (C/T)       |
| 479         | CakSNP479      | <i>Kabuli</i>    | Ca_Kabuli_Chr01              | 3009417                        | (C/T)       |
| 480         | CakSNP480      | <i>Kabuli</i>    | Ca_Kabuli_Chr01              | 3032061                        | (C/A)       |
| 481         | CakSNP481      | <i>Kabuli</i>    | Ca_Kabuli_Chr01              | 3081723                        | (G/T)       |
| 482         | CakSNP482      | <i>Kabuli</i>    | Ca_Kabuli_Chr01              | 3081851                        | (T/G)       |
| 483         | CakSNP483      | <i>Kabuli</i>    | Ca_Kabuli_Chr01              | 3081850                        | (C/A)       |
| 484         | CakSNP484      | <i>Kabuli</i>    | Ca_Kabuli_Chr01              | 3082280                        | (G/A)       |
| 485         | CakSNP485      | <i>Kabuli</i>    | Ca_Kabuli_Chr01              | 3151007                        | (G/A)       |
| 486         | CakSNP486      | <i>Kabuli</i>    | Ca_Kabuli_Chr01              | 3150986                        | (T/C)       |
| 487         | CakSNP487      | <i>Kabuli</i>    | Ca_Kabuli_Chr01              | 3150964                        | (C/G)       |
| 488         | CakSNP488      | <i>Kabuli</i>    | Ca_Kabuli_Chr01              | 3259114                        | (G/A)       |
| 489         | CakSNP489      | <i>Kabuli</i>    | Ca_Kabuli_Chr01              | 3259117                        | (G/C)       |
| 490         | CakSNP490      | <i>Kabuli</i>    | Ca_Kabuli_Chr01              | 3259177                        | (G/C)       |
| 491         | CakSNP491      | <i>Kabuli</i>    | Ca_Kabuli_Chr01              | 3298327                        | (C/G)       |
| 492         | CakSNP492      | <i>Kabuli</i>    | Ca_Kabuli_Chr01              | 3298783                        | (T/G)       |
| 493         | CakSNP493      | <i>Kabuli</i>    | Ca_Kabuli_Chr01              | 3359148                        | (C/A)       |

| <b>S.N.</b> | <b>SNP IDs</b> | <b>Cultivars</b> | <b>Chromosomes/scaffolds</b> | <b>Physical positions (bp)</b> | <b>SNPs</b> |
|-------------|----------------|------------------|------------------------------|--------------------------------|-------------|
| 494         | CakSNP494      | <i>Kabuli</i>    | Ca_Kabuli_Chr01              | 3364952                        | (A/C)       |
| 495         | CakSNP495      | <i>Kabuli</i>    | Ca_Kabuli_Chr01              | 3374375                        | (G/A)       |
| 496         | CakSNP496      | <i>Kabuli</i>    | Ca_Kabuli_Chr01              | 3427555                        | (A/C)       |
| 497         | CakSNP497      | <i>Kabuli</i>    | Ca_Kabuli_Chr01              | 3427649                        | (A/G)       |
| 498         | CakSNP498      | <i>Kabuli</i>    | Ca_Kabuli_Chr01              | 3503059                        | (C/A)       |
| 499         | CakSNP499      | <i>Kabuli</i>    | Ca_Kabuli_Chr01              | 3503153                        | (G/A)       |
| 500         | CakSNP500      | <i>Kabuli</i>    | Ca_Kabuli_Chr01              | 3542263                        | (A/C)       |
| 501         | CakSNP501      | <i>Kabuli</i>    | Ca_Kabuli_Chr01              | 3544948                        | (A/T)       |
| 502         | CakSNP502      | <i>Kabuli</i>    | Ca_Kabuli_Chr01              | 3545011                        | (G/A)       |
| 503         | CakSNP503      | <i>Kabuli</i>    | Ca_Kabuli_Chr01              | 3564342                        | (G/T)       |
| 504         | CakSNP504      | <i>Kabuli</i>    | Ca_Kabuli_Chr01              | 3596241                        | (C/T)       |
| 505         | CakSNP505      | <i>Kabuli</i>    | Ca_Kabuli_Chr01              | 3597842                        | (G/A)       |
| 506         | CakSNP506      | <i>Kabuli</i>    | Ca_Kabuli_Chr01              | 3605582                        | (G/A)       |
| 507         | CakSNP507      | <i>Kabuli</i>    | Ca_Kabuli_Chr01              | 3605583                        | (C/T)       |
| 508         | CakSNP508      | <i>Kabuli</i>    | Ca_Kabuli_Chr01              | 3609580                        | (T/C)       |
| 509         | CakSNP509      | <i>Kabuli</i>    | Ca_Kabuli_Chr01              | 3611231                        | (C/A)       |
| 510         | CakSNP510      | <i>Kabuli</i>    | Ca_Kabuli_Chr01              | 3614966                        | (A/G)       |
| 511         | CakSNP511      | <i>Kabuli</i>    | Ca_Kabuli_Chr01              | 3615037                        | (G/T)       |
| 512         | CakSNP512      | <i>Kabuli</i>    | Ca_Kabuli_Chr01              | 3615064                        | (T/C)       |
| 513         | CakSNP513      | <i>Kabuli</i>    | Ca_Kabuli_Chr01              | 3615052                        | (C/A)       |
| 514         | CakSNP514      | <i>Kabuli</i>    | Ca_Kabuli_Chr01              | 3622757                        | (C/T)       |
| 515         | CakSNP515      | <i>Kabuli</i>    | Ca_Kabuli_Chr01              | 3711498                        | (T/G)       |
| 516         | CakSNP516      | <i>Kabuli</i>    | Ca_Kabuli_Chr01              | 3711525                        | (T/G)       |
| 517         | CakSNP517      | <i>Kabuli</i>    | Ca_Kabuli_Chr01              | 3751865                        | (G/T)       |
| 518         | CakSNP518      | <i>Kabuli</i>    | Ca_Kabuli_Chr01              | 3777223                        | (C/T)       |
| 519         | CakSNP519      | <i>Kabuli</i>    | Ca_Kabuli_Chr01              | 3810931                        | (T/C)       |
| 520         | CakSNP520      | <i>Kabuli</i>    | Ca_Kabuli_Chr01              | 3852035                        | (A/C)       |
| 521         | CakSNP521      | <i>Kabuli</i>    | Ca_Kabuli_Chr01              | 3852476                        | (A/C)       |
| 522         | CakSNP522      | <i>Kabuli</i>    | Ca_Kabuli_Chr01              | 3853408                        | (T/C)       |
| 523         | CakSNP523      | <i>Kabuli</i>    | Ca_Kabuli_Chr01              | 3855229                        | (G/A)       |
| 524         | CakSNP524      | <i>Kabuli</i>    | Ca_Kabuli_Chr01              | 3891319                        | (T/C)       |
| 525         | CakSNP525      | <i>Kabuli</i>    | Ca_Kabuli_Chr01              | 3911547                        | (G/A)       |
| 526         | CakSNP526      | <i>Kabuli</i>    | Ca_Kabuli_Chr01              | 3941250                        | (C/T)       |
| 527         | CakSNP527      | <i>Kabuli</i>    | Ca_Kabuli_Chr01              | 3941399                        | (T/C)       |
| 528         | CakSNP528      | <i>Kabuli</i>    | Ca_Kabuli_Chr01              | 3952819                        | (G/A)       |
| 529         | CakSNP529      | <i>Kabuli</i>    | Ca_Kabuli_Chr01              | 3956031                        | (T/C)       |
| 530         | CakSNP530      | <i>Kabuli</i>    | Ca_Kabuli_Chr01              | 3956028                        | (C/T)       |
| 531         | CakSNP531      | <i>Kabuli</i>    | Ca_Kabuli_Chr01              | 3972671                        | (G/T)       |



| <b>S.N.</b> | <b>SNP IDs</b> | <b>Cultivars</b> | <b>Chromosomes/scaffolds</b> | <b>Physical positions (bp)</b> | <b>SNPs</b> |
|-------------|----------------|------------------|------------------------------|--------------------------------|-------------|
| 532         | CakSNP532      | <i>Kabuli</i>    | Ca_Kabuli_Chr01              | 4048854                        | (G/A)       |
| 533         | CakSNP533      | <i>Kabuli</i>    | Ca_Kabuli_Chr01              | 4048875                        | (A/T)       |
| 534         | CakSNP534      | <i>Kabuli</i>    | Ca_Kabuli_Chr01              | 4073941                        | (A/C)       |
| 535         | CakSNP535      | <i>Kabuli</i>    | Ca_Kabuli_Chr01              | 4112929                        | (A/T)       |
| 536         | CakSNP536      | <i>Kabuli</i>    | Ca_Kabuli_Chr01              | 4189333                        | (C/T)       |
| 537         | CakSNP537      | <i>Kabuli</i>    | Ca_Kabuli_Chr01              | 4189297                        | (T/C)       |
| 538         | CakSNP538      | <i>Kabuli</i>    | Ca_Kabuli_Chr01              | 4245058                        | (C/G)       |
| 539         | CakSNP539      | <i>Kabuli</i>    | Ca_Kabuli_Chr01              | 4245073                        | (C/G)       |
| 540         | CakSNP540      | <i>Kabuli</i>    | Ca_Kabuli_Chr01              | 4245176                        | (G/T)       |
| 541         | CakSNP541      | <i>Kabuli</i>    | Ca_Kabuli_Chr01              | 4292981                        | (G/C)       |
| 542         | CakSNP542      | <i>Kabuli</i>    | Ca_Kabuli_Chr01              | 4302669                        | (G/C)       |
| 543         | CakSNP543      | <i>Kabuli</i>    | Ca_Kabuli_Chr01              | 4302770                        | (A/C)       |
| 544         | CakSNP544      | <i>Kabuli</i>    | Ca_Kabuli_Chr01              | 4302751                        | (T/C)       |
| 545         | CakSNP545      | <i>Kabuli</i>    | Ca_Kabuli_Chr01              | 4334299                        | (A/T)       |
| 546         | CakSNP546      | <i>Kabuli</i>    | Ca_Kabuli_Chr01              | 4334336                        | (A/G)       |
| 547         | CakSNP547      | <i>Kabuli</i>    | Ca_Kabuli_Chr01              | 4372257                        | (A/G)       |
| 548         | CakSNP548      | <i>Kabuli</i>    | Ca_Kabuli_Chr01              | 4375710                        | (T/C)       |
| 549         | CakSNP549      | <i>Kabuli</i>    | Ca_Kabuli_Chr01              | 4385002                        | (C/T)       |
| 550         | CakSNP550      | <i>Kabuli</i>    | Ca_Kabuli_Chr01              | 4386114                        | (T/G)       |
| 551         | CakSNP551      | <i>Kabuli</i>    | Ca_Kabuli_Chr01              | 4386111                        | (T/C)       |
| 552         | CakSNP552      | <i>Kabuli</i>    | Ca_Kabuli_Chr01              | 4392680                        | (A/G)       |
| 553         | CakSNP553      | <i>Kabuli</i>    | Ca_Kabuli_Chr01              | 4414410                        | (A/T)       |
| 554         | CakSNP554      | <i>Kabuli</i>    | Ca_Kabuli_Chr01              | 4423984                        | (A/G)       |
| 555         | CakSNP555      | <i>Kabuli</i>    | Ca_Kabuli_Chr01              | 4429044                        | (C/T)       |
| 556         | CakSNP556      | <i>Kabuli</i>    | Ca_Kabuli_Chr01              | 4432569                        | (A/G)       |
| 557         | CakSNP557      | <i>Kabuli</i>    | Ca_Kabuli_Chr01              | 4432549                        | (C/T)       |
| 558         | CakSNP558      | <i>Kabuli</i>    | Ca_Kabuli_Chr01              | 4432545                        | (C/A)       |
| 559         | CakSNP559      | <i>Kabuli</i>    | Ca_Kabuli_Chr01              | 4432541                        | (C/A)       |
| 560         | CakSNP560      | <i>Kabuli</i>    | Ca_Kabuli_Chr01              | 4456662                        | (G/A)       |
| 561         | CakSNP561      | <i>Kabuli</i>    | Ca_Kabuli_Chr01              | 4456654                        | (A/C)       |
| 562         | CakSNP562      | <i>Kabuli</i>    | Ca_Kabuli_Chr01              | 4456648                        | (T/C)       |
| 563         | CakSNP563      | <i>Kabuli</i>    | Ca_Kabuli_Chr01              | 4457588                        | (A/G)       |
| 564         | CakSNP564      | <i>Kabuli</i>    | Ca_Kabuli_Chr01              | 4460112                        | (A/T)       |
| 565         | CakSNP565      | <i>Kabuli</i>    | Ca_Kabuli_Chr01              | 4494270                        | (C/T)       |
| 566         | CakSNP566      | <i>Kabuli</i>    | Ca_Kabuli_Chr01              | 4494467                        | (A/G)       |
| 567         | CakSNP567      | <i>Kabuli</i>    | Ca_Kabuli_Chr01              | 4512566                        | (T/C)       |
| 568         | CakSNP568      | <i>Kabuli</i>    | Ca_Kabuli_Chr01              | 4528117                        | (A/G)       |
| 569         | CakSNP569      | <i>Kabuli</i>    | Ca_Kabuli_Chr01              | 4528184                        | (C/T)       |

| <b>S.N.</b> | <b>SNP IDs</b> | <b>Cultivars</b> | <b>Chromosomes/scaffolds</b> | <b>Physical positions (bp)</b> | <b>SNPs</b> |
|-------------|----------------|------------------|------------------------------|--------------------------------|-------------|
| 570         | CakSNP570      | <i>Kabuli</i>    | Ca_Kabuli_Chr01              | 4530304                        | (T/C)       |
| 571         | CakSNP571      | <i>Kabuli</i>    | Ca_Kabuli_Chr01              | 4560792                        | (C/T)       |
| 572         | CakSNP572      | <i>Kabuli</i>    | Ca_Kabuli_Chr01              | 4560920                        | (G/A)       |
| 573         | CakSNP573      | <i>Kabuli</i>    | Ca_Kabuli_Chr01              | 4569669                        | (T/A)       |
| 574         | CakSNP574      | <i>Kabuli</i>    | Ca_Kabuli_Chr01              | 4569670                        | (T/A)       |
| 575         | CakSNP575      | <i>Kabuli</i>    | Ca_Kabuli_Chr01              | 4569690                        | (A/G)       |
| 576         | CakSNP576      | <i>Kabuli</i>    | Ca_Kabuli_Chr01              | 4571615                        | (T/C)       |
| 577         | CakSNP577      | <i>Kabuli</i>    | Ca_Kabuli_Chr01              | 4571540                        | (C/G)       |
| 578         | CakSNP578      | <i>Kabuli</i>    | Ca_Kabuli_Chr01              | 4571539                        | (G/A)       |
| 579         | CakSNP579      | <i>Kabuli</i>    | Ca_Kabuli_Chr01              | 4576888                        | (A/G)       |
| 580         | CakSNP580      | <i>Kabuli</i>    | Ca_Kabuli_Chr01              | 4578967                        | (T/G)       |
| 581         | CakSNP581      | <i>Kabuli</i>    | Ca_Kabuli_Chr01              | 4578999                        | (T/A)       |
| 582         | CakSNP582      | <i>Kabuli</i>    | Ca_Kabuli_Chr01              | 4582189                        | (C/T)       |
| 583         | CakSNP583      | <i>Kabuli</i>    | Ca_Kabuli_Chr01              | 4626099                        | (T/G)       |
| 584         | CakSNP584      | <i>Kabuli</i>    | Ca_Kabuli_Chr01              | 4626098                        | (C/G)       |
| 585         | CakSNP585      | <i>Kabuli</i>    | Ca_Kabuli_Chr01              | 4631467                        | (G/A)       |
| 586         | CakSNP586      | <i>Kabuli</i>    | Ca_Kabuli_Chr01              | 4632188                        | (G/A)       |
| 587         | CakSNP587      | <i>Kabuli</i>    | Ca_Kabuli_Chr01              | 4632965                        | (G/A)       |
| 588         | CakSNP588      | <i>Kabuli</i>    | Ca_Kabuli_Chr01              | 4634413                        | (C/T)       |
| 589         | CakSNP589      | <i>Kabuli</i>    | Ca_Kabuli_Chr01              | 4635347                        | (G/A)       |
| 590         | CakSNP590      | <i>Kabuli</i>    | Ca_Kabuli_Chr01              | 4635302                        | (A/C)       |
| 591         | CakSNP591      | <i>Kabuli</i>    | Ca_Kabuli_Chr01              | 4662564                        | (A/G)       |
| 592         | CakSNP592      | <i>Kabuli</i>    | Ca_Kabuli_Chr01              | 4672439                        | (G/A)       |
| 593         | CakSNP593      | <i>Kabuli</i>    | Ca_Kabuli_Chr01              | 4715563                        | (T/C)       |
| 594         | CakSNP594      | <i>Kabuli</i>    | Ca_Kabuli_Chr01              | 4780330                        | (C/T)       |
| 595         | CakSNP595      | <i>Kabuli</i>    | Ca_Kabuli_Chr01              | 4780345                        | (G/T)       |
| 596         | CakSNP596      | <i>Kabuli</i>    | Ca_Kabuli_Chr01              | 4781362                        | (C/T)       |
| 597         | CakSNP597      | <i>Kabuli</i>    | Ca_Kabuli_Chr01              | 4781416                        | (G/A)       |
| 598         | CakSNP598      | <i>Kabuli</i>    | Ca_Kabuli_Chr01              | 4781704                        | (G/A)       |
| 599         | CakSNP599      | <i>Kabuli</i>    | Ca_Kabuli_Chr01              | 4808910                        | (A/T)       |
| 600         | CakSNP600      | <i>Kabuli</i>    | Ca_Kabuli_Chr01              | 4878683                        | (T/C)       |
| 601         | CakSNP601      | <i>Kabuli</i>    | Ca_Kabuli_Chr01              | 4878691                        | (A/C)       |
| 602         | CakSNP602      | <i>Kabuli</i>    | Ca_Kabuli_Chr01              | 4878695                        | (T/C)       |
| 603         | CakSNP603      | <i>Kabuli</i>    | Ca_Kabuli_Chr01              | 4878823                        | (A/G)       |
| 604         | CakSNP604      | <i>Kabuli</i>    | Ca_Kabuli_Chr01              | 4903185                        | (T/A)       |
| 605         | CakSNP605      | <i>Kabuli</i>    | Ca_Kabuli_Chr01              | 4903203                        | (A/G)       |
| 606         | CakSNP606      | <i>Kabuli</i>    | Ca_Kabuli_Chr01              | 4903239                        | (G/A)       |
| 607         | CakSNP607      | <i>Kabuli</i>    | Ca_Kabuli_Chr01              | 4906759                        | (G/C)       |

| <b>S.N.</b> | <b>SNP IDs</b> | <b>Cultivars</b> | <b>Chromosomes/scaffolds</b> | <b>Physical positions (bp)</b> | <b>SNPs</b> |
|-------------|----------------|------------------|------------------------------|--------------------------------|-------------|
| 608         | CakSNP608      | <i>Kabuli</i>    | Ca_Kabuli_Chr01              | 4906775                        | (A/T)       |
| 609         | CakSNP609      | <i>Kabuli</i>    | Ca_Kabuli_Chr01              | 4906777                        | (G/T)       |
| 610         | CakSNP610      | <i>Kabuli</i>    | Ca_Kabuli_Chr01              | 4906778                        | (T/G)       |
| 611         | CakSNP611      | <i>Kabuli</i>    | Ca_Kabuli_Chr01              | 4906800                        | (T/G)       |
| 612         | CakSNP612      | <i>Kabuli</i>    | Ca_Kabuli_Chr01              | 4906816                        | (A/G)       |
| 613         | CakSNP613      | <i>Kabuli</i>    | Ca_Kabuli_Chr01              | 4906868                        | (G/C)       |
| 614         | CakSNP614      | <i>Kabuli</i>    | Ca_Kabuli_Chr01              | 4906859                        | (T/C)       |
| 615         | CakSNP615      | <i>Kabuli</i>    | Ca_Kabuli_Chr01              | 4906854                        | (A/G)       |
| 616         | CakSNP616      | <i>Kabuli</i>    | Ca_Kabuli_Chr01              | 4909155                        | (T/C)       |
| 617         | CakSNP617      | <i>Kabuli</i>    | Ca_Kabuli_Chr01              | 4909286                        | (T/G)       |
| 618         | CakSNP618      | <i>Kabuli</i>    | Ca_Kabuli_Chr01              | 4909280                        | (T/G)       |
| 619         | CakSNP619      | <i>Kabuli</i>    | Ca_Kabuli_Chr01              | 4909271                        | (A/G)       |
| 620         | CakSNP620      | <i>Kabuli</i>    | Ca_Kabuli_Chr01              | 4909268                        | (C/T)       |
| 621         | CakSNP621      | <i>Kabuli</i>    | Ca_Kabuli_Chr01              | 4909261                        | (G/T)       |
| 622         | CakSNP622      | <i>Kabuli</i>    | Ca_Kabuli_Chr01              | 4909255                        | (G/A)       |
| 623         | CakSNP623      | <i>Kabuli</i>    | Ca_Kabuli_Chr01              | 4909253                        | (A/G)       |
| 624         | CakSNP624      | <i>Kabuli</i>    | Ca_Kabuli_Chr01              | 4910497                        | (A/G)       |
| 625         | CakSNP625      | <i>Kabuli</i>    | Ca_Kabuli_Chr01              | 4910494                        | (C/A)       |
| 626         | CakSNP626      | <i>Kabuli</i>    | Ca_Kabuli_Chr01              | 4948740                        | (A/T)       |
| 627         | CakSNP627      | <i>Kabuli</i>    | Ca_Kabuli_Chr01              | 4949578                        | (A/T)       |
| 628         | CakSNP628      | <i>Kabuli</i>    | Ca_Kabuli_Chr01              | 4950457                        | (G/A)       |
| 629         | CakSNP629      | <i>Kabuli</i>    | Ca_Kabuli_Chr01              | 4950726                        | (G/T)       |
| 630         | CakSNP630      | <i>Kabuli</i>    | Ca_Kabuli_Chr01              | 4959562                        | (A/C)       |
| 631         | CakSNP631      | <i>Kabuli</i>    | Ca_Kabuli_Chr01              | 4995240                        | (T/A)       |
| 632         | CakSNP632      | <i>Kabuli</i>    | Ca_Kabuli_Chr01              | 4996404                        | (A/C)       |
| 633         | CakSNP633      | <i>Kabuli</i>    | Ca_Kabuli_Chr01              | 4996459                        | (T/C)       |
| 634         | CakSNP634      | <i>Kabuli</i>    | Ca_Kabuli_Chr01              | 4996476                        | (G/A)       |
| 635         | CakSNP635      | <i>Kabuli</i>    | Ca_Kabuli_Chr01              | 4996536                        | (C/T)       |
| 636         | CakSNP636      | <i>Kabuli</i>    | Ca_Kabuli_Chr01              | 5071210                        | (A/G)       |
| 637         | CakSNP637      | <i>Kabuli</i>    | Ca_Kabuli_Chr01              | 5071195                        | (T/A)       |
| 638         | CakSNP638      | <i>Kabuli</i>    | Ca_Kabuli_Chr01              | 5071177                        | (A/G)       |
| 639         | CakSNP639      | <i>Kabuli</i>    | Ca_Kabuli_Chr01              | 5071158                        | (G/A)       |
| 640         | CakSNP640      | <i>Kabuli</i>    | Ca_Kabuli_Chr01              | 5072022                        | (C/A)       |
| 641         | CakSNP641      | <i>Kabuli</i>    | Ca_Kabuli_Chr01              | 5080342                        | (A/T)       |
| 642         | CakSNP642      | <i>Kabuli</i>    | Ca_Kabuli_Chr01              | 5080358                        | (G/A)       |
| 643         | CakSNP643      | <i>Kabuli</i>    | Ca_Kabuli_Chr01              | 5087428                        | (T/C)       |
| 644         | CakSNP644      | <i>Kabuli</i>    | Ca_Kabuli_Chr01              | 5096676                        | (A/T)       |
| 645         | CakSNP645      | <i>Kabuli</i>    | Ca_Kabuli_Chr01              | 5096650                        | (C/T)       |

| <b>S.N.</b> | <b>SNP IDs</b> | <b>Cultivars</b> | <b>Chromosomes/scaffolds</b> | <b>Physical positions (bp)</b> | <b>SNPs</b> |
|-------------|----------------|------------------|------------------------------|--------------------------------|-------------|
| 646         | CakSNP646      | <i>Kabuli</i>    | Ca_Kabuli_Chr01              | 5122663                        | (A/G)       |
| 647         | CakSNP647      | <i>Kabuli</i>    | Ca_Kabuli_Chr01              | 5129940                        | (G/A)       |
| 648         | CakSNP648      | <i>Kabuli</i>    | Ca_Kabuli_Chr01              | 5138013                        | (A/C)       |
| 649         | CakSNP649      | <i>Kabuli</i>    | Ca_Kabuli_Chr01              | 5140801                        | (C/A)       |
| 650         | CakSNP650      | <i>Kabuli</i>    | Ca_Kabuli_Chr01              | 5140837                        | (A/T)       |
| 651         | CakSNP651      | <i>Kabuli</i>    | Ca_Kabuli_Chr01              | 5141009                        | (G/C)       |
| 652         | CakSNP652      | <i>Kabuli</i>    | Ca_Kabuli_Chr01              | 5140944                        | (C/G)       |
| 653         | CakSNP653      | <i>Kabuli</i>    | Ca_Kabuli_Chr01              | 5146658                        | (C/A)       |
| 654         | CakSNP654      | <i>Kabuli</i>    | Ca_Kabuli_Chr01              | 5146667                        | (T/G)       |
| 655         | CakSNP655      | <i>Kabuli</i>    | Ca_Kabuli_Chr01              | 5146696                        | (T/A)       |
| 656         | CakSNP656      | <i>Kabuli</i>    | Ca_Kabuli_Chr01              | 5164127                        | (A/G)       |
| 657         | CakSNP657      | <i>Kabuli</i>    | Ca_Kabuli_Chr01              | 5164136                        | (C/T)       |
| 658         | CakSNP658      | <i>Kabuli</i>    | Ca_Kabuli_Chr01              | 5164198                        | (C/A)       |
| 659         | CakSNP659      | <i>Kabuli</i>    | Ca_Kabuli_Chr01              | 5197461                        | (C/T)       |
| 660         | CakSNP660      | <i>Kabuli</i>    | Ca_Kabuli_Chr01              | 5197475                        | (T/A)       |
| 661         | CakSNP661      | <i>Kabuli</i>    | Ca_Kabuli_Chr01              | 5200250                        | (T/G)       |
| 662         | CakSNP662      | <i>Kabuli</i>    | Ca_Kabuli_Chr01              | 5200289                        | (G/T)       |
| 663         | CakSNP663      | <i>Kabuli</i>    | Ca_Kabuli_Chr01              | 5249839                        | (G/A)       |
| 664         | CakSNP664      | <i>Kabuli</i>    | Ca_Kabuli_Chr01              | 5249846                        | (A/C)       |
| 665         | CakSNP665      | <i>Kabuli</i>    | Ca_Kabuli_Chr01              | 5249868                        | (G/A)       |
| 666         | CakSNP666      | <i>Kabuli</i>    | Ca_Kabuli_Chr01              | 5288427                        | (T/C)       |
| 667         | CakSNP667      | <i>Kabuli</i>    | Ca_Kabuli_Chr01              | 5288421                        | (A/C)       |
| 668         | CakSNP668      | <i>Kabuli</i>    | Ca_Kabuli_Chr01              | 5304576                        | (A/C)       |
| 669         | CakSNP669      | <i>Kabuli</i>    | Ca_Kabuli_Chr01              | 5321398                        | (A/G)       |
| 670         | CakSNP670      | <i>Kabuli</i>    | Ca_Kabuli_Chr01              | 5430700                        | (A/C)       |
| 671         | CakSNP671      | <i>Kabuli</i>    | Ca_Kabuli_Chr01              | 5430703                        | (T/G)       |
| 672         | CakSNP672      | <i>Kabuli</i>    | Ca_Kabuli_Chr01              | 5430809                        | (G/A)       |
| 673         | CakSNP673      | <i>Kabuli</i>    | Ca_Kabuli_Chr01              | 5444130                        | (A/C)       |
| 674         | CakSNP674      | <i>Kabuli</i>    | Ca_Kabuli_Chr01              | 5444142                        | (A/T)       |
| 675         | CakSNP675      | <i>Kabuli</i>    | Ca_Kabuli_Chr01              | 5474604                        | (G/A)       |
| 676         | CakSNP676      | <i>Kabuli</i>    | Ca_Kabuli_Chr01              | 5477196                        | (T/C)       |
| 677         | CakSNP677      | <i>Kabuli</i>    | Ca_Kabuli_Chr01              | 5487535                        | (A/G)       |
| 678         | CakSNP678      | <i>Kabuli</i>    | Ca_Kabuli_Chr01              | 5489806                        | (C/G)       |
| 679         | CakSNP679      | <i>Kabuli</i>    | Ca_Kabuli_Chr01              | 5577080                        | (T/C)       |
| 680         | CakSNP680      | <i>Kabuli</i>    | Ca_Kabuli_Chr01              | 5629027                        | (G/A)       |
| 681         | CakSNP681      | <i>Kabuli</i>    | Ca_Kabuli_Chr01              | 5637388                        | (T/A)       |
| 682         | CakSNP682      | <i>Kabuli</i>    | Ca_Kabuli_Chr01              | 5637442                        | (C/T)       |
| 683         | CakSNP683      | <i>Kabuli</i>    | Ca_Kabuli_Chr01              | 5643313                        | (G/C)       |

| <b>S.N.</b> | <b>SNP IDs</b> | <b>Cultivars</b> | <b>Chromosomes/scaffolds</b> | <b>Physical positions (bp)</b> | <b>SNPs</b> |
|-------------|----------------|------------------|------------------------------|--------------------------------|-------------|
| 684         | CakSNP684      | <i>Kabuli</i>    | Ca_Kabuli_Chr01              | 5666178                        | (A/C)       |
| 685         | CakSNP685      | <i>Kabuli</i>    | Ca_Kabuli_Chr01              | 5666217                        | (C/A)       |
| 686         | CakSNP686      | <i>Kabuli</i>    | Ca_Kabuli_Chr01              | 5666260                        | (T/G)       |
| 687         | CakSNP687      | <i>Kabuli</i>    | Ca_Kabuli_Chr01              | 5666266                        | (T/G)       |
| 688         | CakSNP688      | <i>Kabuli</i>    | Ca_Kabuli_Chr01              | 5666263                        | (T/G)       |
| 689         | CakSNP689      | <i>Kabuli</i>    | Ca_Kabuli_Chr01              | 5666355                        | (T/G)       |
| 690         | CakSNP690      | <i>Kabuli</i>    | Ca_Kabuli_Chr01              | 5667605                        | (G/A)       |
| 691         | CakSNP691      | <i>Kabuli</i>    | Ca_Kabuli_Chr01              | 5702638                        | (C/T)       |
| 692         | CakSNP692      | <i>Kabuli</i>    | Ca_Kabuli_Chr01              | 5706858                        | (A/T)       |
| 693         | CakSNP693      | <i>Kabuli</i>    | Ca_Kabuli_Chr01              | 5706961                        | (G/T)       |
| 694         | CakSNP694      | <i>Kabuli</i>    | Ca_Kabuli_Chr01              | 5706948                        | (A/T)       |
| 695         | CakSNP695      | <i>Kabuli</i>    | Ca_Kabuli_Chr01              | 5706944                        | (T/G)       |
| 696         | CakSNP696      | <i>Kabuli</i>    | Ca_Kabuli_Chr01              | 5706920                        | (G/A)       |
| 697         | CakSNP697      | <i>Kabuli</i>    | Ca_Kabuli_Chr01              | 5721616                        | (A/T)       |
| 698         | CakSNP698      | <i>Kabuli</i>    | Ca_Kabuli_Chr01              | 5749456                        | (C/T)       |
| 699         | CakSNP699      | <i>Kabuli</i>    | Ca_Kabuli_Chr01              | 5791118                        | (T/G)       |
| 700         | CakSNP700      | <i>Kabuli</i>    | Ca_Kabuli_Chr01              | 5796146                        | (C/T)       |
| 701         | CakSNP701      | <i>Kabuli</i>    | Ca_Kabuli_Chr01              | 5796886                        | (A/G)       |
| 702         | CakSNP702      | <i>Kabuli</i>    | Ca_Kabuli_Chr01              | 5807492                        | (T/C)       |
| 703         | CakSNP703      | <i>Kabuli</i>    | Ca_Kabuli_Chr01              | 5812283                        | (G/T)       |
| 704         | CakSNP704      | <i>Kabuli</i>    | Ca_Kabuli_Chr01              | 5812298                        | (G/A)       |
| 705         | CakSNP705      | <i>Kabuli</i>    | Ca_Kabuli_Chr01              | 5862565                        | (C/T)       |
| 706         | CakSNP706      | <i>Kabuli</i>    | Ca_Kabuli_Chr01              | 5960264                        | (T/C)       |
| 707         | CakSNP707      | <i>Kabuli</i>    | Ca_Kabuli_Chr01              | 5978146                        | (G/A)       |
| 708         | CakSNP708      | <i>Kabuli</i>    | Ca_Kabuli_Chr01              | 5978289                        | (C/T)       |
| 709         | CakSNP709      | <i>Kabuli</i>    | Ca_Kabuli_Chr01              | 5981127                        | (C/T)       |
| 710         | CakSNP710      | <i>Kabuli</i>    | Ca_Kabuli_Chr01              | 5981178                        | (A/G)       |
| 711         | CakSNP711      | <i>Kabuli</i>    | Ca_Kabuli_Chr01              | 6011727                        | (G/T)       |
| 712         | CakSNP712      | <i>Kabuli</i>    | Ca_Kabuli_Chr01              | 6011697                        | (T/G)       |
| 713         | CakSNP713      | <i>Kabuli</i>    | Ca_Kabuli_Chr01              | 6011689                        | (G/A)       |
| 714         | CakSNP714      | <i>Kabuli</i>    | Ca_Kabuli_Chr01              | 6011657                        | (T/C)       |
| 715         | CakSNP715      | <i>Kabuli</i>    | Ca_Kabuli_Chr01              | 6011761                        | (C/T)       |
| 716         | CakSNP716      | <i>Kabuli</i>    | Ca_Kabuli_Chr01              | 6017854                        | (A/C)       |
| 717         | CakSNP717      | <i>Kabuli</i>    | Ca_Kabuli_Chr01              | 6066972                        | (C/T)       |
| 718         | CakSNP718      | <i>Kabuli</i>    | Ca_Kabuli_Chr01              | 6066936                        | (A/G)       |
| 719         | CakSNP719      | <i>Kabuli</i>    | Ca_Kabuli_Chr01              | 6066933                        | (C/T)       |
| 720         | CakSNP720      | <i>Kabuli</i>    | Ca_Kabuli_Chr01              | 6067846                        | (T/C)       |
| 721         | CakSNP721      | <i>Kabuli</i>    | Ca_Kabuli_Chr01              | 6088283                        | (C/T)       |

| <b>S.N.</b> | <b>SNP IDs</b> | <b>Cultivars</b> | <b>Chromosomes/scaffolds</b> | <b>Physical positions (bp)</b> | <b>SNPs</b> |
|-------------|----------------|------------------|------------------------------|--------------------------------|-------------|
| 722         | CakSNP722      | <i>Kabuli</i>    | Ca_Kabuli_Chr01              | 6101205                        | (C/T)       |
| 723         | CakSNP723      | <i>Kabuli</i>    | Ca_Kabuli_Chr01              | 6126761                        | (T/A)       |
| 724         | CakSNP724      | <i>Kabuli</i>    | Ca_Kabuli_Chr01              | 6126772                        | (G/A)       |
| 725         | CakSNP725      | <i>Kabuli</i>    | Ca_Kabuli_Chr01              | 6155341                        | (A/G)       |
| 726         | CakSNP726      | <i>Kabuli</i>    | Ca_Kabuli_Chr01              | 6224010                        | (C/G)       |
| 727         | CakSNP727      | <i>Kabuli</i>    | Ca_Kabuli_Chr01              | 6224015                        | (C/T)       |
| 728         | CakSNP728      | <i>Kabuli</i>    | Ca_Kabuli_Chr01              | 6249062                        | (T/C)       |
| 729         | CakSNP729      | <i>Kabuli</i>    | Ca_Kabuli_Chr01              | 6249035                        | (T/C)       |
| 730         | CakSNP730      | <i>Kabuli</i>    | Ca_Kabuli_Chr01              | 6257653                        | (C/G)       |
| 731         | CakSNP731      | <i>Kabuli</i>    | Ca_Kabuli_Chr01              | 6257712                        | (A/T)       |
| 732         | CakSNP732      | <i>Kabuli</i>    | Ca_Kabuli_Chr01              | 6259458                        | (T/C)       |
| 733         | CakSNP733      | <i>Kabuli</i>    | Ca_Kabuli_Chr01              | 6262461                        | (A/G)       |
| 734         | CakSNP734      | <i>Kabuli</i>    | Ca_Kabuli_Chr01              | 6262529                        | (T/G)       |
| 735         | CakSNP735      | <i>Kabuli</i>    | Ca_Kabuli_Chr01              | 6262577                        | (A/G)       |
| 736         | CakSNP736      | <i>Kabuli</i>    | Ca_Kabuli_Chr01              | 6278572                        | (T/C)       |
| 737         | CakSNP737      | <i>Kabuli</i>    | Ca_Kabuli_Chr01              | 6278625                        | (T/C)       |
| 738         | CakSNP738      | <i>Kabuli</i>    | Ca_Kabuli_Chr01              | 6279644                        | (G/T)       |
| 739         | CakSNP739      | <i>Kabuli</i>    | Ca_Kabuli_Chr01              | 6296858                        | (G/A)       |
| 740         | CakSNP740      | <i>Kabuli</i>    | Ca_Kabuli_Chr01              | 6296986                        | (C/A)       |
| 741         | CakSNP741      | <i>Kabuli</i>    | Ca_Kabuli_Chr01              | 6296929                        | (C/T)       |
| 742         | CakSNP742      | <i>Kabuli</i>    | Ca_Kabuli_Chr01              | 6315337                        | (G/T)       |
| 743         | CakSNP743      | <i>Kabuli</i>    | Ca_Kabuli_Chr01              | 6315402                        | (C/T)       |
| 744         | CakSNP744      | <i>Kabuli</i>    | Ca_Kabuli_Chr01              | 6315399                        | (T/G)       |
| 745         | CakSNP745      | <i>Kabuli</i>    | Ca_Kabuli_Chr01              | 6315397                        | (C/G)       |
| 746         | CakSNP746      | <i>Kabuli</i>    | Ca_Kabuli_Chr01              | 6328801                        | (T/A)       |
| 747         | CakSNP747      | <i>Kabuli</i>    | Ca_Kabuli_Chr01              | 6328957                        | (C/T)       |
| 748         | CakSNP748      | <i>Kabuli</i>    | Ca_Kabuli_Chr01              | 6328963                        | (A/G)       |
| 749         | CakSNP749      | <i>Kabuli</i>    | Ca_Kabuli_Chr01              | 6329805                        | (A/G)       |
| 750         | CakSNP750      | <i>Kabuli</i>    | Ca_Kabuli_Chr01              | 6329814                        | (T/A)       |
| 751         | CakSNP751      | <i>Kabuli</i>    | Ca_Kabuli_Chr01              | 6329844                        | (C/T)       |
| 752         | CakSNP752      | <i>Kabuli</i>    | Ca_Kabuli_Chr01              | 6329847                        | (A/G)       |
| 753         | CakSNP753      | <i>Kabuli</i>    | Ca_Kabuli_Chr01              | 6332229                        | (T/C)       |
| 754         | CakSNP754      | <i>Kabuli</i>    | Ca_Kabuli_Chr01              | 6347626                        | (C/T)       |
| 755         | CakSNP755      | <i>Kabuli</i>    | Ca_Kabuli_Chr01              | 6347720                        | (G/A)       |
| 756         | CakSNP756      | <i>Kabuli</i>    | Ca_Kabuli_Chr01              | 6381114                        | (T/G)       |
| 757         | CakSNP757      | <i>Kabuli</i>    | Ca_Kabuli_Chr01              | 6381191                        | (T/C)       |
| 758         | CakSNP758      | <i>Kabuli</i>    | Ca_Kabuli_Chr01              | 6390541                        | (T/A)       |
| 759         | CakSNP759      | <i>Kabuli</i>    | Ca_Kabuli_Chr01              | 6390849                        | (G/A)       |

| <b>S.N.</b> | <b>SNP IDs</b> | <b>Cultivars</b> | <b>Chromosomes/scaffolds</b> | <b>Physical positions (bp)</b> | <b>SNPs</b> |
|-------------|----------------|------------------|------------------------------|--------------------------------|-------------|
| 760         | CakSNP760      | <i>Kabuli</i>    | Ca_Kabuli_Chr01              | 6391017                        | (T/C)       |
| 761         | CakSNP761      | <i>Kabuli</i>    | Ca_Kabuli_Chr01              | 6433592                        | (T/G)       |
| 762         | CakSNP762      | <i>Kabuli</i>    | Ca_Kabuli_Chr01              | 6433826                        | (G/A)       |
| 763         | CakSNP763      | <i>Kabuli</i>    | Ca_Kabuli_Chr01              | 6433838                        | (C/T)       |
| 764         | CakSNP764      | <i>Kabuli</i>    | Ca_Kabuli_Chr01              | 6433841                        | (C/T)       |
| 765         | CakSNP765      | <i>Kabuli</i>    | Ca_Kabuli_Chr01              | 6433883                        | (A/G)       |
| 766         | CakSNP766      | <i>Kabuli</i>    | Ca_Kabuli_Chr01              | 6433934                        | (T/A)       |
| 767         | CakSNP767      | <i>Kabuli</i>    | Ca_Kabuli_Chr01              | 6433925                        | (C/T)       |
| 768         | CakSNP768      | <i>Kabuli</i>    | Ca_Kabuli_Chr01              | 6478736                        | (A/G)       |
| 769         | CakSNP769      | <i>Kabuli</i>    | Ca_Kabuli_Chr01              | 6478758                        | (A/G)       |
| 770         | CakSNP770      | <i>Kabuli</i>    | Ca_Kabuli_Chr01              | 6486446                        | (G/C)       |
| 771         | CakSNP771      | <i>Kabuli</i>    | Ca_Kabuli_Chr01              | 6490978                        | (A/T)       |
| 772         | CakSNP772      | <i>Kabuli</i>    | Ca_Kabuli_Chr01              | 6491008                        | (A/T)       |
| 773         | CakSNP773      | <i>Kabuli</i>    | Ca_Kabuli_Chr01              | 6491030                        | (T/G)       |
| 774         | CakSNP774      | <i>Kabuli</i>    | Ca_Kabuli_Chr01              | 6491017                        | (T/C)       |
| 775         | CakSNP775      | <i>Kabuli</i>    | Ca_Kabuli_Chr01              | 6521670                        | (C/T)       |
| 776         | CakSNP776      | <i>Kabuli</i>    | Ca_Kabuli_Chr01              | 6521673                        | (G/A)       |
| 777         | CakSNP777      | <i>Kabuli</i>    | Ca_Kabuli_Chr01              | 6521856                        | (A/G)       |
| 778         | CakSNP778      | <i>Kabuli</i>    | Ca_Kabuli_Chr01              | 6521859                        | (T/A)       |
| 779         | CakSNP779      | <i>Kabuli</i>    | Ca_Kabuli_Chr01              | 6521970                        | (C/T)       |
| 780         | CakSNP780      | <i>Kabuli</i>    | Ca_Kabuli_Chr01              | 6540056                        | (C/T)       |
| 781         | CakSNP781      | <i>Kabuli</i>    | Ca_Kabuli_Chr01              | 6540170                        | (G/A)       |
| 782         | CakSNP782      | <i>Kabuli</i>    | Ca_Kabuli_Chr01              | 6553107                        | (A/C)       |
| 783         | CakSNP783      | <i>Kabuli</i>    | Ca_Kabuli_Chr01              | 6564716                        | (C/T)       |
| 784         | CakSNP784      | <i>Kabuli</i>    | Ca_Kabuli_Chr01              | 6564789                        | (C/T)       |
| 785         | CakSNP785      | <i>Kabuli</i>    | Ca_Kabuli_Chr01              | 6591506                        | (G/C)       |
| 786         | CakSNP786      | <i>Kabuli</i>    | Ca_Kabuli_Chr01              | 6591518                        | (G/T)       |
| 787         | CakSNP787      | <i>Kabuli</i>    | Ca_Kabuli_Chr01              | 6599917                        | (C/A)       |
| 788         | CakSNP788      | <i>Kabuli</i>    | Ca_Kabuli_Chr01              | 6634482                        | (G/C)       |
| 789         | CakSNP789      | <i>Kabuli</i>    | Ca_Kabuli_Chr01              | 6635404                        | (C/T)       |
| 790         | CakSNP790      | <i>Kabuli</i>    | Ca_Kabuli_Chr01              | 6635401                        | (T/C)       |
| 791         | CakSNP791      | <i>Kabuli</i>    | Ca_Kabuli_Chr01              | 6635366                        | (T/C)       |
| 792         | CakSNP792      | <i>Kabuli</i>    | Ca_Kabuli_Chr01              | 6679253                        | (A/G)       |
| 793         | CakSNP793      | <i>Kabuli</i>    | Ca_Kabuli_Chr01              | 6679329                        | (A/G)       |
| 794         | CakSNP794      | <i>Kabuli</i>    | Ca_Kabuli_Chr01              | 6803364                        | (G/A)       |
| 795         | CakSNP795      | <i>Kabuli</i>    | Ca_Kabuli_Chr01              | 6804031                        | (C/T)       |
| 796         | CakSNP796      | <i>Kabuli</i>    | Ca_Kabuli_Chr01              | 6804110                        | (A/T)       |
| 797         | CakSNP797      | <i>Kabuli</i>    | Ca_Kabuli_Chr01              | 6849437                        | (C/T)       |

| <b>S.N.</b> | <b>SNP IDs</b> | <b>Cultivars</b> | <b>Chromosomes/scaffolds</b> | <b>Physical positions (bp)</b> | <b>SNPs</b> |
|-------------|----------------|------------------|------------------------------|--------------------------------|-------------|
| 798         | CakSNP798      | <i>Kabuli</i>    | Ca_Kabuli_Chr01              | 6849512                        | (G/C)       |
| 799         | CakSNP799      | <i>Kabuli</i>    | Ca_Kabuli_Chr01              | 6879110                        | (G/C)       |
| 800         | CakSNP800      | <i>Kabuli</i>    | Ca_Kabuli_Chr01              | 6880666                        | (A/G)       |
| 801         | CakSNP801      | <i>Kabuli</i>    | Ca_Kabuli_Chr01              | 6880837                        | (A/G)       |
| 802         | CakSNP802      | <i>Kabuli</i>    | Ca_Kabuli_Chr01              | 6904278                        | (A/C)       |
| 803         | CakSNP803      | <i>Kabuli</i>    | Ca_Kabuli_Chr01              | 6904313                        | (A/C)       |
| 804         | CakSNP804      | <i>Kabuli</i>    | Ca_Kabuli_Chr01              | 6904338                        | (C/T)       |
| 805         | CakSNP805      | <i>Kabuli</i>    | Ca_Kabuli_Chr01              | 6952382                        | (G/T)       |
| 806         | CakSNP806      | <i>Kabuli</i>    | Ca_Kabuli_Chr01              | 7050825                        | (G/A)       |
| 807         | CakSNP807      | <i>Kabuli</i>    | Ca_Kabuli_Chr01              | 7050958                        | (C/T)       |
| 808         | CakSNP808      | <i>Kabuli</i>    | Ca_Kabuli_Chr01              | 7050953                        | (C/T)       |
| 809         | CakSNP809      | <i>Kabuli</i>    | Ca_Kabuli_Chr01              | 7104985                        | (G/T)       |
| 810         | CakSNP810      | <i>Kabuli</i>    | Ca_Kabuli_Chr01              | 7127843                        | (A/G)       |
| 811         | CakSNP811      | <i>Kabuli</i>    | Ca_Kabuli_Chr01              | 7136677                        | (T/C)       |
| 812         | CakSNP812      | <i>Kabuli</i>    | Ca_Kabuli_Chr01              | 7147651                        | (T/A)       |
| 813         | CakSNP813      | <i>Kabuli</i>    | Ca_Kabuli_Chr01              | 7147643                        | (A/G)       |
| 814         | CakSNP814      | <i>Kabuli</i>    | Ca_Kabuli_Chr01              | 7155344                        | (A/G)       |
| 815         | CakSNP815      | <i>Kabuli</i>    | Ca_Kabuli_Chr01              | 7155302                        | (A/G)       |
| 816         | CakSNP816      | <i>Kabuli</i>    | Ca_Kabuli_Chr01              | 7156354                        | (G/T)       |
| 817         | CakSNP817      | <i>Kabuli</i>    | Ca_Kabuli_Chr01              | 7156355                        | (A/T)       |
| 818         | CakSNP818      | <i>Kabuli</i>    | Ca_Kabuli_Chr01              | 7157057                        | (A/C)       |
| 819         | CakSNP819      | <i>Kabuli</i>    | Ca_Kabuli_Chr01              | 7157112                        | (T/C)       |
| 820         | CakSNP820      | <i>Kabuli</i>    | Ca_Kabuli_Chr01              | 7160649                        | (T/C)       |
| 821         | CakSNP821      | <i>Kabuli</i>    | Ca_Kabuli_Chr01              | 7160648                        | (A/T)       |
| 822         | CakSNP822      | <i>Kabuli</i>    | Ca_Kabuli_Chr01              | 7160695                        | (G/A)       |
| 823         | CakSNP823      | <i>Kabuli</i>    | Ca_Kabuli_Chr01              | 7160698                        | (A/C)       |
| 824         | CakSNP824      | <i>Kabuli</i>    | Ca_Kabuli_Chr01              | 7160754                        | (A/T)       |
| 825         | CakSNP825      | <i>Kabuli</i>    | Ca_Kabuli_Chr01              | 7160781                        | (A/C)       |
| 826         | CakSNP826      | <i>Kabuli</i>    | Ca_Kabuli_Chr01              | 7160773                        | (G/A)       |
| 827         | CakSNP827      | <i>Kabuli</i>    | Ca_Kabuli_Chr01              | 7161122                        | (A/G)       |
| 828         | CakSNP828      | <i>Kabuli</i>    | Ca_Kabuli_Chr01              | 7184813                        | (A/C)       |
| 829         | CakSNP829      | <i>Kabuli</i>    | Ca_Kabuli_Chr01              | 7184773                        | (G/A)       |
| 830         | CakSNP830      | <i>Kabuli</i>    | Ca_Kabuli_Chr01              | 7187934                        | (A/G)       |
| 831         | CakSNP831      | <i>Kabuli</i>    | Ca_Kabuli_Chr01              | 7187969                        | (C/G)       |
| 832         | CakSNP832      | <i>Kabuli</i>    | Ca_Kabuli_Chr01              | 7196570                        | (T/C)       |
| 833         | CakSNP833      | <i>Kabuli</i>    | Ca_Kabuli_Chr01              | 7196601                        | (T/C)       |
| 834         | CakSNP834      | <i>Kabuli</i>    | Ca_Kabuli_Chr01              | 7231750                        | (A/C)       |
| 835         | CakSNP835      | <i>Kabuli</i>    | Ca_Kabuli_Chr01              | 7325164                        | (T/A)       |



| <b>S.N.</b> | <b>SNP IDs</b> | <b>Cultivars</b> | <b>Chromosomes/scaffolds</b> | <b>Physical positions (bp)</b> | <b>SNPs</b> |
|-------------|----------------|------------------|------------------------------|--------------------------------|-------------|
| 836         | CakSNP836      | <i>Kabuli</i>    | Ca_Kabuli_Chr01              | 7417717                        | (G/A)       |
| 837         | CakSNP837      | <i>Kabuli</i>    | Ca_Kabuli_Chr01              | 7417699                        | (G/A)       |
| 838         | CakSNP838      | <i>Kabuli</i>    | Ca_Kabuli_Chr01              | 7417788                        | (G/A)       |
| 839         | CakSNP839      | <i>Kabuli</i>    | Ca_Kabuli_Chr01              | 7439421                        | (C/T)       |
| 840         | CakSNP840      | <i>Kabuli</i>    | Ca_Kabuli_Chr01              | 7467280                        | (A/G)       |
| 841         | CakSNP841      | <i>Kabuli</i>    | Ca_Kabuli_Chr01              | 7478022                        | (G/A)       |
| 842         | CakSNP842      | <i>Kabuli</i>    | Ca_Kabuli_Chr01              | 7478046                        | (T/G)       |
| 843         | CakSNP843      | <i>Kabuli</i>    | Ca_Kabuli_Chr01              | 7486102                        | (C/T)       |
| 844         | CakSNP844      | <i>Kabuli</i>    | Ca_Kabuli_Chr01              | 7486273                        | (T/C)       |
| 845         | CakSNP845      | <i>Kabuli</i>    | Ca_Kabuli_Chr01              | 7486282                        | (G/A)       |
| 846         | CakSNP846      | <i>Kabuli</i>    | Ca_Kabuli_Chr01              | 7497334                        | (C/A)       |
| 847         | CakSNP847      | <i>Kabuli</i>    | Ca_Kabuli_Chr01              | 7497362                        | (T/C)       |
| 848         | CakSNP848      | <i>Kabuli</i>    | Ca_Kabuli_Chr01              | 7500494                        | (T/G)       |
| 849         | CakSNP849      | <i>Kabuli</i>    | Ca_Kabuli_Chr01              | 7500524                        | (T/C)       |
| 850         | CakSNP850      | <i>Kabuli</i>    | Ca_Kabuli_Chr01              | 7500665                        | (C/A)       |
| 851         | CakSNP851      | <i>Kabuli</i>    | Ca_Kabuli_Chr01              | 7505779                        | (A/T)       |
| 852         | CakSNP852      | <i>Kabuli</i>    | Ca_Kabuli_Chr01              | 7505792                        | (A/T)       |
| 853         | CakSNP853      | <i>Kabuli</i>    | Ca_Kabuli_Chr01              | 7515002                        | (T/C)       |
| 854         | CakSNP854      | <i>Kabuli</i>    | Ca_Kabuli_Chr01              | 7515605                        | (T/C)       |
| 855         | CakSNP855      | <i>Kabuli</i>    | Ca_Kabuli_Chr01              | 7515578                        | (A/C)       |
| 856         | CakSNP856      | <i>Kabuli</i>    | Ca_Kabuli_Chr01              | 7557751                        | (T/G)       |
| 857         | CakSNP857      | <i>Kabuli</i>    | Ca_Kabuli_Chr01              | 7557811                        | (A/T)       |
| 858         | CakSNP858      | <i>Kabuli</i>    | Ca_Kabuli_Chr01              | 7690613                        | (T/G)       |
| 859         | CakSNP859      | <i>Kabuli</i>    | Ca_Kabuli_Chr01              | 7690620                        | (T/G)       |
| 860         | CakSNP860      | <i>Kabuli</i>    | Ca_Kabuli_Chr01              | 7690625                        | (A/C)       |
| 861         | CakSNP861      | <i>Kabuli</i>    | Ca_Kabuli_Chr01              | 7695844                        | (T/C)       |
| 862         | CakSNP862      | <i>Kabuli</i>    | Ca_Kabuli_Chr01              | 7811388                        | (C/T)       |
| 863         | CakSNP863      | <i>Kabuli</i>    | Ca_Kabuli_Chr01              | 7925666                        | (A/C)       |
| 864         | CakSNP864      | <i>Kabuli</i>    | Ca_Kabuli_Chr01              | 7925801                        | (C/T)       |
| 865         | CakSNP865      | <i>Kabuli</i>    | Ca_Kabuli_Chr01              | 7925774                        | (C/T)       |
| 866         | CakSNP866      | <i>Kabuli</i>    | Ca_Kabuli_Chr01              | 7925738                        | (C/T)       |
| 867         | CakSNP867      | <i>Kabuli</i>    | Ca_Kabuli_Chr01              | 7969202                        | (A/C)       |
| 868         | CakSNP868      | <i>Kabuli</i>    | Ca_Kabuli_Chr01              | 7969694                        | (A/G)       |
| 869         | CakSNP869      | <i>Kabuli</i>    | Ca_Kabuli_Chr01              | 7969647                        | (G/A)       |
| 870         | CakSNP870      | <i>Kabuli</i>    | Ca_Kabuli_Chr01              | 8036666                        | (C/T)       |
| 871         | CakSNP871      | <i>Kabuli</i>    | Ca_Kabuli_Chr01              | 8036706                        | (A/G)       |
| 872         | CakSNP872      | <i>Kabuli</i>    | Ca_Kabuli_Chr01              | 8036917                        | (T/G)       |
| 873         | CakSNP873      | <i>Kabuli</i>    | Ca_Kabuli_Chr01              | 8036903                        | (A/T)       |

| <b>S.N.</b> | <b>SNP IDs</b> | <b>Cultivars</b> | <b>Chromosomes/scaffolds</b> | <b>Physical positions (bp)</b> | <b>SNPs</b> |
|-------------|----------------|------------------|------------------------------|--------------------------------|-------------|
| 874         | CakSNP874      | <i>Kabuli</i>    | Ca_Kabuli_Chr01              | 8075631                        | (A/T)       |
| 875         | CakSNP875      | <i>Kabuli</i>    | Ca_Kabuli_Chr01              | 8103090                        | (G/T)       |
| 876         | CakSNP876      | <i>Kabuli</i>    | Ca_Kabuli_Chr01              | 8103339                        | (T/C)       |
| 877         | CakSNP877      | <i>Kabuli</i>    | Ca_Kabuli_Chr01              | 8103401                        | (T/A)       |
| 878         | CakSNP878      | <i>Kabuli</i>    | Ca_Kabuli_Chr01              | 8107967                        | (A/C)       |
| 879         | CakSNP879      | <i>Kabuli</i>    | Ca_Kabuli_Chr01              | 8108014                        | (C/T)       |
| 880         | CakSNP880      | <i>Kabuli</i>    | Ca_Kabuli_Chr01              | 8111588                        | (G/A)       |
| 881         | CakSNP881      | <i>Kabuli</i>    | Ca_Kabuli_Chr01              | 8112343                        | (C/T)       |
| 882         | CakSNP882      | <i>Kabuli</i>    | Ca_Kabuli_Chr01              | 8113235                        | (G/T)       |
| 883         | CakSNP883      | <i>Kabuli</i>    | Ca_Kabuli_Chr01              | 8113383                        | (T/G)       |
| 884         | CakSNP884      | <i>Kabuli</i>    | Ca_Kabuli_Chr01              | 8113449                        | (T/A)       |
| 885         | CakSNP885      | <i>Kabuli</i>    | Ca_Kabuli_Chr01              | 8113403                        | (A/T)       |
| 886         | CakSNP886      | <i>Kabuli</i>    | Ca_Kabuli_Chr01              | 8113398                        | (C/G)       |
| 887         | CakSNP887      | <i>Kabuli</i>    | Ca_Kabuli_Chr01              | 8123033                        | (A/G)       |
| 888         | CakSNP888      | <i>Kabuli</i>    | Ca_Kabuli_Chr01              | 8123257                        | (A/G)       |
| 889         | CakSNP889      | <i>Kabuli</i>    | Ca_Kabuli_Chr01              | 8123481                        | (A/G)       |
| 890         | CakSNP890      | <i>Kabuli</i>    | Ca_Kabuli_Chr01              | 8134368                        | (T/C)       |
| 891         | CakSNP891      | <i>Kabuli</i>    | Ca_Kabuli_Chr01              | 8178109                        | (T/C)       |
| 892         | CakSNP892      | <i>Kabuli</i>    | Ca_Kabuli_Chr01              | 8178146                        | (G/A)       |
| 893         | CakSNP893      | <i>Kabuli</i>    | Ca_Kabuli_Chr01              | 8192580                        | (T/C)       |
| 894         | CakSNP894      | <i>Kabuli</i>    | Ca_Kabuli_Chr01              | 8220996                        | (T/A)       |
| 895         | CakSNP895      | <i>Kabuli</i>    | Ca_Kabuli_Chr01              | 8220968                        | (A/G)       |
| 896         | CakSNP896      | <i>Kabuli</i>    | Ca_Kabuli_Chr01              | 8343356                        | (G/A)       |
| 897         | CakSNP897      | <i>Kabuli</i>    | Ca_Kabuli_Chr01              | 8389242                        | (G/A)       |
| 898         | CakSNP898      | <i>Kabuli</i>    | Ca_Kabuli_Chr01              | 8464621                        | (C/G)       |
| 899         | CakSNP899      | <i>Kabuli</i>    | Ca_Kabuli_Chr01              | 8582341                        | (T/C)       |
| 900         | CakSNP900      | <i>Kabuli</i>    | Ca_Kabuli_Chr01              | 8607820                        | (T/C)       |
| 901         | CakSNP901      | <i>Kabuli</i>    | Ca_Kabuli_Chr01              | 8607919                        | (A/C)       |
| 902         | CakSNP902      | <i>Kabuli</i>    | Ca_Kabuli_Chr01              | 8633598                        | (G/A)       |
| 903         | CakSNP903      | <i>Kabuli</i>    | Ca_Kabuli_Chr01              | 8665705                        | (T/G)       |
| 904         | CakSNP904      | <i>Kabuli</i>    | Ca_Kabuli_Chr01              | 8697177                        | (G/T)       |
| 905         | CakSNP905      | <i>Kabuli</i>    | Ca_Kabuli_Chr01              | 8698059                        | (T/C)       |
| 906         | CakSNP906      | <i>Kabuli</i>    | Ca_Kabuli_Chr01              | 8735740                        | (G/T)       |
| 907         | CakSNP907      | <i>Kabuli</i>    | Ca_Kabuli_Chr01              | 8735727                        | (G/C)       |
| 908         | CakSNP908      | <i>Kabuli</i>    | Ca_Kabuli_Chr01              | 8736733                        | (G/A)       |
| 909         | CakSNP909      | <i>Kabuli</i>    | Ca_Kabuli_Chr01              | 8736711                        | (G/T)       |
| 910         | CakSNP910      | <i>Kabuli</i>    | Ca_Kabuli_Chr01              | 8737380                        | (A/G)       |
| 911         | CakSNP911      | <i>Kabuli</i>    | Ca_Kabuli_Chr01              | 8738691                        | (T/G)       |

| <b>S.N.</b> | <b>SNP IDs</b> | <b>Cultivars</b> | <b>Chromosomes/scaffolds</b> | <b>Physical positions (bp)</b> | <b>SNPs</b> |
|-------------|----------------|------------------|------------------------------|--------------------------------|-------------|
| 912         | CakSNP912      | <i>Kabuli</i>    | Ca_Kabuli_Chr01              | 8738695                        | (G/C)       |
| 913         | CakSNP913      | <i>Kabuli</i>    | Ca_Kabuli_Chr01              | 8767122                        | (T/A)       |
| 914         | CakSNP914      | <i>Kabuli</i>    | Ca_Kabuli_Chr01              | 8767121                        | (A/T)       |
| 915         | CakSNP915      | <i>Kabuli</i>    | Ca_Kabuli_Chr01              | 8799685                        | (T/G)       |
| 916         | CakSNP916      | <i>Kabuli</i>    | Ca_Kabuli_Chr01              | 8799701                        | (T/C)       |
| 917         | CakSNP917      | <i>Kabuli</i>    | Ca_Kabuli_Chr01              | 8799708                        | (T/C)       |
| 918         | CakSNP918      | <i>Kabuli</i>    | Ca_Kabuli_Chr01              | 8799758                        | (C/G)       |
| 919         | CakSNP919      | <i>Kabuli</i>    | Ca_Kabuli_Chr01              | 8809188                        | (T/A)       |
| 920         | CakSNP920      | <i>Kabuli</i>    | Ca_Kabuli_Chr01              | 8809191                        | (C/T)       |
| 921         | CakSNP921      | <i>Kabuli</i>    | Ca_Kabuli_Chr01              | 8809295                        | (A/T)       |
| 922         | CakSNP922      | <i>Kabuli</i>    | Ca_Kabuli_Chr01              | 8809517                        | (C/G)       |
| 923         | CakSNP923      | <i>Kabuli</i>    | Ca_Kabuli_Chr01              | 8822121                        | (G/T)       |
| 924         | CakSNP924      | <i>Kabuli</i>    | Ca_Kabuli_Chr01              | 8822375                        | (G/A)       |
| 925         | CakSNP925      | <i>Kabuli</i>    | Ca_Kabuli_Chr01              | 8822366                        | (T/A)       |
| 926         | CakSNP926      | <i>Kabuli</i>    | Ca_Kabuli_Chr01              | 8824856                        | (T/C)       |
| 927         | CakSNP927      | <i>Kabuli</i>    | Ca_Kabuli_Chr01              | 8852863                        | (G/T)       |
| 928         | CakSNP928      | <i>Kabuli</i>    | Ca_Kabuli_Chr01              | 8852928                        | (T/A)       |
| 929         | CakSNP929      | <i>Kabuli</i>    | Ca_Kabuli_Chr01              | 8852981                        | (C/A)       |
| 930         | CakSNP930      | <i>Kabuli</i>    | Ca_Kabuli_Chr01              | 8852957                        | (C/A)       |
| 931         | CakSNP931      | <i>Kabuli</i>    | Ca_Kabuli_Chr01              | 8852943                        | (C/A)       |
| 932         | CakSNP932      | <i>Kabuli</i>    | Ca_Kabuli_Chr01              | 8853010                        | (A/G)       |
| 933         | CakSNP933      | <i>Kabuli</i>    | Ca_Kabuli_Chr01              | 8854211                        | (G/T)       |
| 934         | CakSNP934      | <i>Kabuli</i>    | Ca_Kabuli_Chr01              | 8891438                        | (T/G)       |
| 935         | CakSNP935      | <i>Kabuli</i>    | Ca_Kabuli_Chr01              | 8891485                        | (T/G)       |
| 936         | CakSNP936      | <i>Kabuli</i>    | Ca_Kabuli_Chr01              | 8891562                        | (C/G)       |
| 937         | CakSNP937      | <i>Kabuli</i>    | Ca_Kabuli_Chr01              | 8891561                        | (G/A)       |
| 938         | CakSNP938      | <i>Kabuli</i>    | Ca_Kabuli_Chr01              | 8893985                        | (G/A)       |
| 939         | CakSNP939      | <i>Kabuli</i>    | Ca_Kabuli_Chr01              | 8901769                        | (C/A)       |
| 940         | CakSNP940      | <i>Kabuli</i>    | Ca_Kabuli_Chr01              | 8901842                        | (T/A)       |
| 941         | CakSNP941      | <i>Kabuli</i>    | Ca_Kabuli_Chr01              | 8941004                        | (A/C)       |
| 942         | CakSNP942      | <i>Kabuli</i>    | Ca_Kabuli_Chr01              | 8941029                        | (G/A)       |
| 943         | CakSNP943      | <i>Kabuli</i>    | Ca_Kabuli_Chr01              | 8941031                        | (G/C)       |
| 944         | CakSNP944      | <i>Kabuli</i>    | Ca_Kabuli_Chr01              | 8942137                        | (T/C)       |
| 945         | CakSNP945      | <i>Kabuli</i>    | Ca_Kabuli_Chr01              | 8942131                        | (T/C)       |
| 946         | CakSNP946      | <i>Kabuli</i>    | Ca_Kabuli_Chr01              | 8942198                        | (A/G)       |
| 947         | CakSNP947      | <i>Kabuli</i>    | Ca_Kabuli_Chr01              | 8942179                        | (C/G)       |
| 948         | CakSNP948      | <i>Kabuli</i>    | Ca_Kabuli_Chr01              | 8949723                        | (G/T)       |
| 949         | CakSNP949      | <i>Kabuli</i>    | Ca_Kabuli_Chr01              | 8960630                        | (T/C)       |

| <b>S.N.</b> | <b>SNP IDs</b> | <b>Cultivars</b> | <b>Chromosomes/scaffolds</b> | <b>Physical positions (bp)</b> | <b>SNPs</b> |
|-------------|----------------|------------------|------------------------------|--------------------------------|-------------|
| 950         | CakSNP950      | <i>Kabuli</i>    | Ca_Kabuli_Chr01              | 8969321                        | (C/T)       |
| 951         | CakSNP951      | <i>Kabuli</i>    | Ca_Kabuli_Chr01              | 8971718                        | (C/G)       |
| 952         | CakSNP952      | <i>Kabuli</i>    | Ca_Kabuli_Chr01              | 8971776                        | (A/G)       |
| 953         | CakSNP953      | <i>Kabuli</i>    | Ca_Kabuli_Chr01              | 8976169                        | (A/T)       |
| 954         | CakSNP954      | <i>Kabuli</i>    | Ca_Kabuli_Chr01              | 8980112                        | (C/A)       |
| 955         | CakSNP955      | <i>Kabuli</i>    | Ca_Kabuli_Chr01              | 8993300                        | (T/C)       |
| 956         | CakSNP956      | <i>Kabuli</i>    | Ca_Kabuli_Chr01              | 8993329                        | (A/C)       |
| 957         | CakSNP957      | <i>Kabuli</i>    | Ca_Kabuli_Chr01              | 9018113                        | (A/C)       |
| 958         | CakSNP958      | <i>Kabuli</i>    | Ca_Kabuli_Chr01              | 9031417                        | (G/T)       |
| 959         | CakSNP959      | <i>Kabuli</i>    | Ca_Kabuli_Chr01              | 9031825                        | (G/T)       |
| 960         | CakSNP960      | <i>Kabuli</i>    | Ca_Kabuli_Chr01              | 9032126                        | (G/A)       |
| 961         | CakSNP961      | <i>Kabuli</i>    | Ca_Kabuli_Chr01              | 9035744                        | (G/A)       |
| 962         | CakSNP962      | <i>Kabuli</i>    | Ca_Kabuli_Chr01              | 9040419                        | (T/A)       |
| 963         | CakSNP963      | <i>Kabuli</i>    | Ca_Kabuli_Chr01              | 9048675                        | (A/T)       |
| 964         | CakSNP964      | <i>Kabuli</i>    | Ca_Kabuli_Chr01              | 9048682                        | (T/G)       |
| 965         | CakSNP965      | <i>Kabuli</i>    | Ca_Kabuli_Chr01              | 9054490                        | (G/A)       |
| 966         | CakSNP966      | <i>Kabuli</i>    | Ca_Kabuli_Chr01              | 9065933                        | (T/C)       |
| 967         | CakSNP967      | <i>Kabuli</i>    | Ca_Kabuli_Chr01              | 9093812                        | (C/G)       |
| 968         | CakSNP968      | <i>Kabuli</i>    | Ca_Kabuli_Chr01              | 9093964                        | (T/A)       |
| 969         | CakSNP969      | <i>Kabuli</i>    | Ca_Kabuli_Chr01              | 9097885                        | (A/G)       |
| 970         | CakSNP970      | <i>Kabuli</i>    | Ca_Kabuli_Chr01              | 9097881                        | (C/G)       |
| 971         | CakSNP971      | <i>Kabuli</i>    | Ca_Kabuli_Chr01              | 9097879                        | (C/A)       |
| 972         | CakSNP972      | <i>Kabuli</i>    | Ca_Kabuli_Chr01              | 9097878                        | (A/G)       |
| 973         | CakSNP973      | <i>Kabuli</i>    | Ca_Kabuli_Chr01              | 9097877                        | (C/A)       |
| 974         | CakSNP974      | <i>Kabuli</i>    | Ca_Kabuli_Chr01              | 9097869                        | (G/T)       |
| 975         | CakSNP975      | <i>Kabuli</i>    | Ca_Kabuli_Chr01              | 9097947                        | (C/A)       |
| 976         | CakSNP976      | <i>Kabuli</i>    | Ca_Kabuli_Chr01              | 9097949                        | (A/C)       |
| 977         | CakSNP977      | <i>Kabuli</i>    | Ca_Kabuli_Chr01              | 9098003                        | (C/T)       |
| 978         | CakSNP978      | <i>Kabuli</i>    | Ca_Kabuli_Chr01              | 9098051                        | (A/G)       |
| 979         | CakSNP979      | <i>Kabuli</i>    | Ca_Kabuli_Chr01              | 9105432                        | (C/T)       |
| 980         | CakSNP980      | <i>Kabuli</i>    | Ca_Kabuli_Chr01              | 9195312                        | (G/A)       |
| 981         | CakSNP981      | <i>Kabuli</i>    | Ca_Kabuli_Chr01              | 9237766                        | (T/G)       |
| 982         | CakSNP982      | <i>Kabuli</i>    | Ca_Kabuli_Chr01              | 9237813                        | (G/T)       |
| 983         | CakSNP983      | <i>Kabuli</i>    | Ca_Kabuli_Chr01              | 9269888                        | (T/A)       |
| 984         | CakSNP984      | <i>Kabuli</i>    | Ca_Kabuli_Chr01              | 9468041                        | (C/T)       |
| 985         | CakSNP985      | <i>Kabuli</i>    | Ca_Kabuli_Chr01              | 9468895                        | (C/A)       |
| 986         | CakSNP986      | <i>Kabuli</i>    | Ca_Kabuli_Chr01              | 9476207                        | (A/C)       |
| 987         | CakSNP987      | <i>Kabuli</i>    | Ca_Kabuli_Chr01              | 9476388                        | (A/G)       |

| <b>S.N.</b> | <b>SNP IDs</b> | <b>Cultivars</b> | <b>Chromosomes/scaffolds</b> | <b>Physical positions (bp)</b> | <b>SNPs</b> |
|-------------|----------------|------------------|------------------------------|--------------------------------|-------------|
| 988         | CakSNP988      | <i>Kabuli</i>    | Ca_Kabuli_Chr01              | 9476385                        | (A/G)       |
| 989         | CakSNP989      | <i>Kabuli</i>    | Ca_Kabuli_Chr01              | 9535616                        | (C/T)       |
| 990         | CakSNP990      | <i>Kabuli</i>    | Ca_Kabuli_Chr01              | 9547223                        | (A/G)       |
| 991         | CakSNP991      | <i>Kabuli</i>    | Ca_Kabuli_Chr01              | 9547310                        | (A/G)       |
| 992         | CakSNP992      | <i>Kabuli</i>    | Ca_Kabuli_Chr01              | 9547854                        | (G/A)       |
| 993         | CakSNP993      | <i>Kabuli</i>    | Ca_Kabuli_Chr01              | 9547834                        | (C/T)       |
| 994         | CakSNP994      | <i>Kabuli</i>    | Ca_Kabuli_Chr01              | 9547819                        | (T/C)       |
| 995         | CakSNP995      | <i>Kabuli</i>    | Ca_Kabuli_Chr01              | 9556418                        | (C/G)       |
| 996         | CakSNP996      | <i>Kabuli</i>    | Ca_Kabuli_Chr01              | 9556486                        | (T/G)       |
| 997         | CakSNP997      | <i>Kabuli</i>    | Ca_Kabuli_Chr01              | 9556487                        | (T/A)       |
| 998         | CakSNP998      | <i>Kabuli</i>    | Ca_Kabuli_Chr01              | 9556488                        | (G/A)       |
| 999         | CakSNP999      | <i>Kabuli</i>    | Ca_Kabuli_Chr01              | 9556588                        | (G/T)       |
| 1000        | CakSNP1000     | <i>Kabuli</i>    | Ca_Kabuli_Chr01              | 9556604                        | (G/C)       |
| 1001        | CakSNP1001     | <i>Kabuli</i>    | Ca_Kabuli_Chr01              | 9556628                        | (G/A)       |
| 1002        | CakSNP1002     | <i>Kabuli</i>    | Ca_Kabuli_Chr01              | 9556735                        | (G/A)       |
| 1003        | CakSNP1003     | <i>Kabuli</i>    | Ca_Kabuli_Chr01              | 9556662                        | (C/T)       |
| 1004        | CakSNP1004     | <i>Kabuli</i>    | Ca_Kabuli_Chr01              | 9567049                        | (C/G)       |
| 1005        | CakSNP1005     | <i>Kabuli</i>    | Ca_Kabuli_Chr01              | 9603896                        | (T/A)       |
| 1006        | CakSNP1006     | <i>Kabuli</i>    | Ca_Kabuli_Chr01              | 9634823                        | (C/T)       |
| 1007        | CakSNP1007     | <i>Kabuli</i>    | Ca_Kabuli_Chr01              | 9647861                        | (G/C)       |
| 1008        | CakSNP1008     | <i>Kabuli</i>    | Ca_Kabuli_Chr01              | 9659316                        | (C/T)       |
| 1009        | CakSNP1009     | <i>Kabuli</i>    | Ca_Kabuli_Chr01              | 9705162                        | (A/C)       |
| 1010        | CakSNP1010     | <i>Kabuli</i>    | Ca_Kabuli_Chr01              | 9706910                        | (C/T)       |
| 1011        | CakSNP1011     | <i>Kabuli</i>    | Ca_Kabuli_Chr01              | 9737032                        | (C/T)       |
| 1012        | CakSNP1012     | <i>Kabuli</i>    | Ca_Kabuli_Chr01              | 9737067                        | (T/C)       |
| 1013        | CakSNP1013     | <i>Kabuli</i>    | Ca_Kabuli_Chr01              | 9757006                        | (G/A)       |
| 1014        | CakSNP1014     | <i>Kabuli</i>    | Ca_Kabuli_Chr01              | 9779398                        | (G/A)       |
| 1015        | CakSNP1015     | <i>Kabuli</i>    | Ca_Kabuli_Chr01              | 9797342                        | (G/T)       |
| 1016        | CakSNP1016     | <i>Kabuli</i>    | Ca_Kabuli_Chr01              | 9810275                        | (T/C)       |
| 1017        | CakSNP1017     | <i>Kabuli</i>    | Ca_Kabuli_Chr01              | 9815448                        | (A/T)       |
| 1018        | CakSNP1018     | <i>Kabuli</i>    | Ca_Kabuli_Chr01              | 9815508                        | (G/C)       |
| 1019        | CakSNP1019     | <i>Kabuli</i>    | Ca_Kabuli_Chr01              | 9836198                        | (A/C)       |
| 1020        | CakSNP1020     | <i>Kabuli</i>    | Ca_Kabuli_Chr01              | 9896511                        | (C/T)       |
| 1021        | CakSNP1021     | <i>Kabuli</i>    | Ca_Kabuli_Chr01              | 9920951                        | (G/A)       |
| 1022        | CakSNP1022     | <i>Kabuli</i>    | Ca_Kabuli_Chr01              | 9920986                        | (A/C)       |
| 1023        | CakSNP1023     | <i>Kabuli</i>    | Ca_Kabuli_Chr01              | 9932690                        | (C/G)       |
| 1024        | CakSNP1024     | <i>Kabuli</i>    | Ca_Kabuli_Chr01              | 10038486                       | (T/G)       |
| 1025        | CakSNP1025     | <i>Kabuli</i>    | Ca_Kabuli_Chr01              | 10049364                       | (A/G)       |

| <b>S.N.</b> | <b>SNP IDs</b> | <b>Cultivars</b> | <b>Chromosomes/scaffolds</b> | <b>Physical positions (bp)</b> | <b>SNPs</b> |
|-------------|----------------|------------------|------------------------------|--------------------------------|-------------|
| 1026        | CakSNP1026     | <i>Kabuli</i>    | Ca_Kabuli_Chr01              | 10049469                       | (A/G)       |
| 1027        | CakSNP1027     | <i>Kabuli</i>    | Ca_Kabuli_Chr01              | 10142688                       | (A/G)       |
| 1028        | CakSNP1028     | <i>Kabuli</i>    | Ca_Kabuli_Chr01              | 10155496                       | (T/G)       |
| 1029        | CakSNP1029     | <i>Kabuli</i>    | Ca_Kabuli_Chr01              | 10155584                       | (T/C)       |
| 1030        | CakSNP1030     | <i>Kabuli</i>    | Ca_Kabuli_Chr01              | 10191578                       | (A/C)       |
| 1031        | CakSNP1031     | <i>Kabuli</i>    | Ca_Kabuli_Chr01              | 10201074                       | (C/G)       |
| 1032        | CakSNP1032     | <i>Kabuli</i>    | Ca_Kabuli_Chr01              | 10212925                       | (G/C)       |
| 1033        | CakSNP1033     | <i>Kabuli</i>    | Ca_Kabuli_Chr01              | 10212926                       | (A/C)       |
| 1034        | CakSNP1034     | <i>Kabuli</i>    | Ca_Kabuli_Chr01              | 10212948                       | (T/C)       |
| 1035        | CakSNP1035     | <i>Kabuli</i>    | Ca_Kabuli_Chr01              | 10212976                       | (T/A)       |
| 1036        | CakSNP1036     | <i>Kabuli</i>    | Ca_Kabuli_Chr01              | 10213111                       | (T/C)       |
| 1037        | CakSNP1037     | <i>Kabuli</i>    | Ca_Kabuli_Chr01              | 10266774                       | (C/T)       |
| 1038        | CakSNP1038     | <i>Kabuli</i>    | Ca_Kabuli_Chr01              | 10289781                       | (G/A)       |
| 1039        | CakSNP1039     | <i>Kabuli</i>    | Ca_Kabuli_Chr01              | 10340870                       | (G/C)       |
| 1040        | CakSNP1040     | <i>Kabuli</i>    | Ca_Kabuli_Chr01              | 10364986                       | (C/G)       |
| 1041        | CakSNP1041     | <i>Kabuli</i>    | Ca_Kabuli_Chr01              | 10365024                       | (G/A)       |
| 1042        | CakSNP1042     | <i>Kabuli</i>    | Ca_Kabuli_Chr01              | 10365029                       | (T/A)       |
| 1043        | CakSNP1043     | <i>Kabuli</i>    | Ca_Kabuli_Chr01              | 10366383                       | (G/A)       |
| 1044        | CakSNP1044     | <i>Kabuli</i>    | Ca_Kabuli_Chr01              | 10377700                       | (G/C)       |
| 1045        | CakSNP1045     | <i>Kabuli</i>    | Ca_Kabuli_Chr01              | 10377698                       | (T/C)       |
| 1046        | CakSNP1046     | <i>Kabuli</i>    | Ca_Kabuli_Chr01              | 10377691                       | (T/C)       |
| 1047        | CakSNP1047     | <i>Kabuli</i>    | Ca_Kabuli_Chr01              | 10377860                       | (T/A)       |
| 1048        | CakSNP1048     | <i>Kabuli</i>    | Ca_Kabuli_Chr01              | 10408322                       | (A/G)       |
| 1049        | CakSNP1049     | <i>Kabuli</i>    | Ca_Kabuli_Chr01              | 10408349                       | (G/T)       |
| 1050        | CakSNP1050     | <i>Kabuli</i>    | Ca_Kabuli_Chr01              | 10410479                       | (T/C)       |
| 1051        | CakSNP1051     | <i>Kabuli</i>    | Ca_Kabuli_Chr01              | 10439153                       | (C/G)       |
| 1052        | CakSNP1052     | <i>Kabuli</i>    | Ca_Kabuli_Chr01              | 10439177                       | (T/C)       |
| 1053        | CakSNP1053     | <i>Kabuli</i>    | Ca_Kabuli_Chr01              | 10439190                       | (C/A)       |
| 1054        | CakSNP1054     | <i>Kabuli</i>    | Ca_Kabuli_Chr01              | 10440393                       | (C/T)       |
| 1055        | CakSNP1055     | <i>Kabuli</i>    | Ca_Kabuli_Chr01              | 10440430                       | (G/T)       |
| 1056        | CakSNP1056     | <i>Kabuli</i>    | Ca_Kabuli_Chr01              | 10440533                       | (C/A)       |
| 1057        | CakSNP1057     | <i>Kabuli</i>    | Ca_Kabuli_Chr01              | 10440479                       | (C/T)       |
| 1058        | CakSNP1058     | <i>Kabuli</i>    | Ca_Kabuli_Chr01              | 10489197                       | (A/G)       |
| 1059        | CakSNP1059     | <i>Kabuli</i>    | Ca_Kabuli_Chr01              | 10527733                       | (A/G)       |
| 1060        | CakSNP1060     | <i>Kabuli</i>    | Ca_Kabuli_Chr01              | 10551440                       | (T/C)       |
| 1061        | CakSNP1061     | <i>Kabuli</i>    | Ca_Kabuli_Chr01              | 10556610                       | (T/G)       |
| 1062        | CakSNP1062     | <i>Kabuli</i>    | Ca_Kabuli_Chr01              | 10560693                       | (A/G)       |
| 1063        | CakSNP1063     | <i>Kabuli</i>    | Ca_Kabuli_Chr01              | 10560690                       | (T/G)       |

| <b>S.N.</b> | <b>SNP IDs</b> | <b>Cultivars</b> | <b>Chromosomes/scaffolds</b> | <b>Physical positions (bp)</b> | <b>SNPs</b> |
|-------------|----------------|------------------|------------------------------|--------------------------------|-------------|
| 1064        | CakSNP1064     | <i>Kabuli</i>    | Ca_Kabuli_Chr01              | 10567303                       | (A/C)       |
| 1065        | CakSNP1065     | <i>Kabuli</i>    | Ca_Kabuli_Chr01              | 10571949                       | (G/A)       |
| 1066        | CakSNP1066     | <i>Kabuli</i>    | Ca_Kabuli_Chr01              | 10601318                       | (T/G)       |
| 1067        | CakSNP1067     | <i>Kabuli</i>    | Ca_Kabuli_Chr01              | 10605977                       | (G/A)       |
| 1068        | CakSNP1068     | <i>Kabuli</i>    | Ca_Kabuli_Chr01              | 10623359                       | (T/G)       |
| 1069        | CakSNP1069     | <i>Kabuli</i>    | Ca_Kabuli_Chr01              | 10630658                       | (A/T)       |
| 1070        | CakSNP1070     | <i>Kabuli</i>    | Ca_Kabuli_Chr01              | 10649758                       | (C/T)       |
| 1071        | CakSNP1071     | <i>Kabuli</i>    | Ca_Kabuli_Chr01              | 10655633                       | (G/T)       |
| 1072        | CakSNP1072     | <i>Kabuli</i>    | Ca_Kabuli_Chr01              | 10657464                       | (T/A)       |
| 1073        | CakSNP1073     | <i>Kabuli</i>    | Ca_Kabuli_Chr01              | 10697972                       | (C/G)       |
| 1074        | CakSNP1074     | <i>Kabuli</i>    | Ca_Kabuli_Chr01              | 10710672                       | (T/G)       |
| 1075        | CakSNP1075     | <i>Kabuli</i>    | Ca_Kabuli_Chr01              | 10712235                       | (G/A)       |
| 1076        | CakSNP1076     | <i>Kabuli</i>    | Ca_Kabuli_Chr01              | 10713001                       | (T/A)       |
| 1077        | CakSNP1077     | <i>Kabuli</i>    | Ca_Kabuli_Chr01              | 10734511                       | (G/A)       |
| 1078        | CakSNP1078     | <i>Kabuli</i>    | Ca_Kabuli_Chr01              | 10734570                       | (G/A)       |
| 1079        | CakSNP1079     | <i>Kabuli</i>    | Ca_Kabuli_Chr01              | 10739374                       | (T/A)       |
| 1080        | CakSNP1080     | <i>Kabuli</i>    | Ca_Kabuli_Chr01              | 10761609                       | (G/T)       |
| 1081        | CakSNP1081     | <i>Kabuli</i>    | Ca_Kabuli_Chr01              | 10761648                       | (C/T)       |
| 1082        | CakSNP1082     | <i>Kabuli</i>    | Ca_Kabuli_Chr01              | 10814166                       | (T/C)       |
| 1083        | CakSNP1083     | <i>Kabuli</i>    | Ca_Kabuli_Chr01              | 10837203                       | (C/T)       |
| 1084        | CakSNP1084     | <i>Kabuli</i>    | Ca_Kabuli_Chr01              | 10861334                       | (A/G)       |
| 1085        | CakSNP1085     | <i>Kabuli</i>    | Ca_Kabuli_Chr01              | 10861332                       | (C/G)       |
| 1086        | CakSNP1086     | <i>Kabuli</i>    | Ca_Kabuli_Chr01              | 10861326                       | (T/G)       |
| 1087        | CakSNP1087     | <i>Kabuli</i>    | Ca_Kabuli_Chr01              | 10869338                       | (A/T)       |
| 1088        | CakSNP1088     | <i>Kabuli</i>    | Ca_Kabuli_Chr01              | 10869336                       | (G/A)       |
| 1089        | CakSNP1089     | <i>Kabuli</i>    | Ca_Kabuli_Chr01              | 10887927                       | (C/A)       |
| 1090        | CakSNP1090     | <i>Kabuli</i>    | Ca_Kabuli_Chr01              | 10939428                       | (T/C)       |
| 1091        | CakSNP1091     | <i>Kabuli</i>    | Ca_Kabuli_Chr01              | 10973356                       | (C/T)       |
| 1092        | CakSNP1092     | <i>Kabuli</i>    | Ca_Kabuli_Chr01              | 11065411                       | (T/A)       |
| 1093        | CakSNP1093     | <i>Kabuli</i>    | Ca_Kabuli_Chr01              | 11103176                       | (T/C)       |
| 1094        | CakSNP1094     | <i>Kabuli</i>    | Ca_Kabuli_Chr01              | 11121162                       | (G/A)       |
| 1095        | CakSNP1095     | <i>Kabuli</i>    | Ca_Kabuli_Chr01              | 11122665                       | (G/T)       |
| 1096        | CakSNP1096     | <i>Kabuli</i>    | Ca_Kabuli_Chr01              | 11191023                       | (G/A)       |
| 1097        | CakSNP1097     | <i>Kabuli</i>    | Ca_Kabuli_Chr01              | 11193334                       | (G/C)       |
| 1098        | CakSNP1098     | <i>Kabuli</i>    | Ca_Kabuli_Chr01              | 11225828                       | (T/C)       |
| 1099        | CakSNP1099     | <i>Kabuli</i>    | Ca_Kabuli_Chr01              | 11227614                       | (T/C)       |
| 1100        | CakSNP1100     | <i>Kabuli</i>    | Ca_Kabuli_Chr01              | 11230086                       | (A/G)       |
| 1101        | CakSNP1101     | <i>Kabuli</i>    | Ca_Kabuli_Chr01              | 11230109                       | (T/C)       |

| <b>S.N.</b> | <b>SNP IDs</b> | <b>Cultivars</b> | <b>Chromosomes/scaffolds</b> | <b>Physical positions (bp)</b> | <b>SNPs</b> |
|-------------|----------------|------------------|------------------------------|--------------------------------|-------------|
| 1102        | CakSNP1102     | <i>Kabuli</i>    | Ca_Kabuli_Chr01              | 11230115                       | (G/C)       |
| 1103        | CakSNP1103     | <i>Kabuli</i>    | Ca_Kabuli_Chr01              | 11230116                       | (T/C)       |
| 1104        | CakSNP1104     | <i>Kabuli</i>    | Ca_Kabuli_Chr01              | 11230118                       | (A/T)       |
| 1105        | CakSNP1105     | <i>Kabuli</i>    | Ca_Kabuli_Chr01              | 11230125                       | (A/C)       |
| 1106        | CakSNP1106     | <i>Kabuli</i>    | Ca_Kabuli_Chr01              | 11230126                       | (G/T)       |
| 1107        | CakSNP1107     | <i>Kabuli</i>    | Ca_Kabuli_Chr01              | 11230127                       | (G/T)       |
| 1108        | CakSNP1108     | <i>Kabuli</i>    | Ca_Kabuli_Chr01              | 11230128                       | (T/G)       |
| 1109        | CakSNP1109     | <i>Kabuli</i>    | Ca_Kabuli_Chr01              | 11230133                       | (G/A)       |
| 1110        | CakSNP1110     | <i>Kabuli</i>    | Ca_Kabuli_Chr01              | 11230972                       | (C/T)       |
| 1111        | CakSNP1111     | <i>Kabuli</i>    | Ca_Kabuli_Chr01              | 11230998                       | (A/T)       |
| 1112        | CakSNP1112     | <i>Kabuli</i>    | Ca_Kabuli_Chr01              | 11231052                       | (A/G)       |
| 1113        | CakSNP1113     | <i>Kabuli</i>    | Ca_Kabuli_Chr01              | 11231064                       | (A/G)       |
| 1114        | CakSNP1114     | <i>Kabuli</i>    | Ca_Kabuli_Chr01              | 11231077                       | (T/C)       |
| 1115        | CakSNP1115     | <i>Kabuli</i>    | Ca_Kabuli_Chr01              | 11235211                       | (C/T)       |
| 1116        | CakSNP1116     | <i>Kabuli</i>    | Ca_Kabuli_Chr01              | 11265367                       | (T/C)       |
| 1117        | CakSNP1117     | <i>Kabuli</i>    | Ca_Kabuli_Chr01              | 11277703                       | (T/A)       |
| 1118        | CakSNP1118     | <i>Kabuli</i>    | Ca_Kabuli_Chr01              | 11277964                       | (C/T)       |
| 1119        | CakSNP1119     | <i>Kabuli</i>    | Ca_Kabuli_Chr01              | 11284183                       | (T/C)       |
| 1120        | CakSNP1120     | <i>Kabuli</i>    | Ca_Kabuli_Chr01              | 11285192                       | (G/A)       |
| 1121        | CakSNP1121     | <i>Kabuli</i>    | Ca_Kabuli_Chr01              | 11285247                       | (T/C)       |
| 1122        | CakSNP1122     | <i>Kabuli</i>    | Ca_Kabuli_Chr01              | 11285291                       | (C/A)       |
| 1123        | CakSNP1123     | <i>Kabuli</i>    | Ca_Kabuli_Chr01              | 11291516                       | (G/A)       |
| 1124        | CakSNP1124     | <i>Kabuli</i>    | Ca_Kabuli_Chr01              | 11291741                       | (A/C)       |
| 1125        | CakSNP1125     | <i>Kabuli</i>    | Ca_Kabuli_Chr01              | 11291740                       | (T/A)       |
| 1126        | CakSNP1126     | <i>Kabuli</i>    | Ca_Kabuli_Chr01              | 11291737                       | (C/A)       |
| 1127        | CakSNP1127     | <i>Kabuli</i>    | Ca_Kabuli_Chr01              | 11319264                       | (A/C)       |
| 1128        | CakSNP1128     | <i>Kabuli</i>    | Ca_Kabuli_Chr01              | 11321670                       | (G/C)       |
| 1129        | CakSNP1129     | <i>Kabuli</i>    | Ca_Kabuli_Chr01              | 11324018                       | (C/A)       |
| 1130        | CakSNP1130     | <i>Kabuli</i>    | Ca_Kabuli_Chr01              | 11324023                       | (C/T)       |
| 1131        | CakSNP1131     | <i>Kabuli</i>    | Ca_Kabuli_Chr01              | 11324035                       | (C/T)       |
| 1132        | CakSNP1132     | <i>Kabuli</i>    | Ca_Kabuli_Chr01              | 11324050                       | (G/T)       |
| 1133        | CakSNP1133     | <i>Kabuli</i>    | Ca_Kabuli_Chr01              | 11342388                       | (T/C)       |
| 1134        | CakSNP1134     | <i>Kabuli</i>    | Ca_Kabuli_Chr01              | 11361646                       | (G/A)       |
| 1135        | CakSNP1135     | <i>Kabuli</i>    | Ca_Kabuli_Chr01              | 11361588                       | (T/G)       |
| 1136        | CakSNP1136     | <i>Kabuli</i>    | Ca_Kabuli_Chr01              | 11361583                       | (T/C)       |
| 1137        | CakSNP1137     | <i>Kabuli</i>    | Ca_Kabuli_Chr01              | 11374707                       | (G/A)       |
| 1138        | CakSNP1138     | <i>Kabuli</i>    | Ca_Kabuli_Chr01              | 11405015                       | (A/G)       |
| 1139        | CakSNP1139     | <i>Kabuli</i>    | Ca_Kabuli_Chr01              | 11405118                       | (G/A)       |



| <b>S.N.</b> | <b>SNP IDs</b> | <b>Cultivars</b> | <b>Chromosomes/scaffolds</b> | <b>Physical positions (bp)</b> | <b>SNPs</b> |
|-------------|----------------|------------------|------------------------------|--------------------------------|-------------|
| 1140        | CakSNP1140     | <i>Kabuli</i>    | Ca_Kabuli_Chr01              | 11423677                       | (C/A)       |
| 1141        | CakSNP1141     | <i>Kabuli</i>    | Ca_Kabuli_Chr01              | 11487689                       | (A/G)       |
| 1142        | CakSNP1142     | <i>Kabuli</i>    | Ca_Kabuli_Chr01              | 11487630                       | (C/A)       |
| 1143        | CakSNP1143     | <i>Kabuli</i>    | Ca_Kabuli_Chr01              | 11487752                       | (G/T)       |
| 1144        | CakSNP1144     | <i>Kabuli</i>    | Ca_Kabuli_Chr01              | 11502148                       | (C/A)       |
| 1145        | CakSNP1145     | <i>Kabuli</i>    | Ca_Kabuli_Chr01              | 11514888                       | (T/A)       |
| 1146        | CakSNP1146     | <i>Kabuli</i>    | Ca_Kabuli_Chr01              | 11514898                       | (T/C)       |
| 1147        | CakSNP1147     | <i>Kabuli</i>    | Ca_Kabuli_Chr01              | 11514903                       | (A/G)       |
| 1148        | CakSNP1148     | <i>Kabuli</i>    | Ca_Kabuli_Chr01              | 11515055                       | (G/A)       |
| 1149        | CakSNP1149     | <i>Kabuli</i>    | Ca_Kabuli_Chr01              | 11515130                       | (T/G)       |
| 1150        | CakSNP1150     | <i>Kabuli</i>    | Ca_Kabuli_Chr01              | 11522656                       | (G/T)       |
| 1151        | CakSNP1151     | <i>Kabuli</i>    | Ca_Kabuli_Chr01              | 11522743                       | (T/C)       |
| 1152        | CakSNP1152     | <i>Kabuli</i>    | Ca_Kabuli_Chr01              | 11522875                       | (C/T)       |
| 1153        | CakSNP1153     | <i>Kabuli</i>    | Ca_Kabuli_Chr01              | 11601347                       | (T/C)       |
| 1154        | CakSNP1154     | <i>Kabuli</i>    | Ca_Kabuli_Chr01              | 11624419                       | (C/G)       |
| 1155        | CakSNP1155     | <i>Kabuli</i>    | Ca_Kabuli_Chr01              | 11624464                       | (C/T)       |
| 1156        | CakSNP1156     | <i>Kabuli</i>    | Ca_Kabuli_Chr01              | 11669794                       | (T/G)       |
| 1157        | CakSNP1157     | <i>Kabuli</i>    | Ca_Kabuli_Chr01              | 11673478                       | (A/C)       |
| 1158        | CakSNP1158     | <i>Kabuli</i>    | Ca_Kabuli_Chr01              | 11677097                       | (C/A)       |
| 1159        | CakSNP1159     | <i>Kabuli</i>    | Ca_Kabuli_Chr01              | 11685769                       | (A/G)       |
| 1160        | CakSNP1160     | <i>Kabuli</i>    | Ca_Kabuli_Chr01              | 11685790                       | (T/C)       |
| 1161        | CakSNP1161     | <i>Kabuli</i>    | Ca_Kabuli_Chr01              | 11706451                       | (C/T)       |
| 1162        | CakSNP1162     | <i>Kabuli</i>    | Ca_Kabuli_Chr01              | 11706494                       | (G/C)       |
| 1163        | CakSNP1163     | <i>Kabuli</i>    | Ca_Kabuli_Chr01              | 11706583                       | (A/C)       |
| 1164        | CakSNP1164     | <i>Kabuli</i>    | Ca_Kabuli_Chr01              | 11706545                       | (C/G)       |
| 1165        | CakSNP1165     | <i>Kabuli</i>    | Ca_Kabuli_Chr01              | 11741448                       | (T/A)       |
| 1166        | CakSNP1166     | <i>Kabuli</i>    | Ca_Kabuli_Chr01              | 11793443                       | (C/A)       |
| 1167        | CakSNP1167     | <i>Kabuli</i>    | Ca_Kabuli_Chr01              | 11822248                       | (A/T)       |
| 1168        | CakSNP1168     | <i>Kabuli</i>    | Ca_Kabuli_Chr01              | 11822305                       | (G/T)       |
| 1169        | CakSNP1169     | <i>Kabuli</i>    | Ca_Kabuli_Chr01              | 11822309                       | (C/A)       |
| 1170        | CakSNP1170     | <i>Kabuli</i>    | Ca_Kabuli_Chr01              | 11870401                       | (A/G)       |
| 1171        | CakSNP1171     | <i>Kabuli</i>    | Ca_Kabuli_Chr01              | 11935333                       | (A/T)       |
| 1172        | CakSNP1172     | <i>Kabuli</i>    | Ca_Kabuli_Chr01              | 11955896                       | (G/T)       |
| 1173        | CakSNP1173     | <i>Kabuli</i>    | Ca_Kabuli_Chr01              | 11955866                       | (G/A)       |
| 1174        | CakSNP1174     | <i>Kabuli</i>    | Ca_Kabuli_Chr01              | 11955853                       | (A/T)       |
| 1175        | CakSNP1175     | <i>Kabuli</i>    | Ca_Kabuli_Chr01              | 12054809                       | (C/T)       |
| 1176        | CakSNP1176     | <i>Kabuli</i>    | Ca_Kabuli_Chr01              | 12189822                       | (T/G)       |
| 1177        | CakSNP1177     | <i>Kabuli</i>    | Ca_Kabuli_Chr01              | 12189825                       | (T/G)       |

| <b>S.N.</b> | <b>SNP IDs</b> | <b>Cultivars</b> | <b>Chromosomes/scaffolds</b> | <b>Physical positions (bp)</b> | <b>SNPs</b> |
|-------------|----------------|------------------|------------------------------|--------------------------------|-------------|
| 1178        | CakSNP1178     | <i>Kabuli</i>    | Ca_Kabuli_Chr01              | 12193933                       | (T/G)       |
| 1179        | CakSNP1179     | <i>Kabuli</i>    | Ca_Kabuli_Chr01              | 12199691                       | (C/G)       |
| 1180        | CakSNP1180     | <i>Kabuli</i>    | Ca_Kabuli_Chr01              | 12236387                       | (T/A)       |
| 1181        | CakSNP1181     | <i>Kabuli</i>    | Ca_Kabuli_Chr01              | 12264697                       | (T/G)       |
| 1182        | CakSNP1182     | <i>Kabuli</i>    | Ca_Kabuli_Chr01              | 12326230                       | (A/G)       |
| 1183        | CakSNP1183     | <i>Kabuli</i>    | Ca_Kabuli_Chr01              | 12326234                       | (T/A)       |
| 1184        | CakSNP1184     | <i>Kabuli</i>    | Ca_Kabuli_Chr01              | 12326318                       | (C/G)       |
| 1185        | CakSNP1185     | <i>Kabuli</i>    | Ca_Kabuli_Chr01              | 12334259                       | (C/T)       |
| 1186        | CakSNP1186     | <i>Kabuli</i>    | Ca_Kabuli_Chr01              | 12340884                       | (C/T)       |
| 1187        | CakSNP1187     | <i>Kabuli</i>    | Ca_Kabuli_Chr01              | 12390756                       | (G/T)       |
| 1188        | CakSNP1188     | <i>Kabuli</i>    | Ca_Kabuli_Chr01              | 12390750                       | (T/C)       |
| 1189        | CakSNP1189     | <i>Kabuli</i>    | Ca_Kabuli_Chr01              | 12391116                       | (G/C)       |
| 1190        | CakSNP1190     | <i>Kabuli</i>    | Ca_Kabuli_Chr01              | 12391074                       | (G/A)       |
| 1191        | CakSNP1191     | <i>Kabuli</i>    | Ca_Kabuli_Chr01              | 12391067                       | (C/A)       |
| 1192        | CakSNP1192     | <i>Kabuli</i>    | Ca_Kabuli_Chr01              | 12413012                       | (G/T)       |
| 1193        | CakSNP1193     | <i>Kabuli</i>    | Ca_Kabuli_Chr01              | 12413016                       | (T/A)       |
| 1194        | CakSNP1194     | <i>Kabuli</i>    | Ca_Kabuli_Chr01              | 12413025                       | (G/C)       |
| 1195        | CakSNP1195     | <i>Kabuli</i>    | Ca_Kabuli_Chr01              | 12413116                       | (G/A)       |
| 1196        | CakSNP1196     | <i>Kabuli</i>    | Ca_Kabuli_Chr01              | 12414040                       | (G/A)       |
| 1197        | CakSNP1197     | <i>Kabuli</i>    | Ca_Kabuli_Chr01              | 12481879                       | (C/A)       |
| 1198        | CakSNP1198     | <i>Kabuli</i>    | Ca_Kabuli_Chr01              | 12525445                       | (A/G)       |
| 1199        | CakSNP1199     | <i>Kabuli</i>    | Ca_Kabuli_Chr01              | 12525640                       | (G/C)       |
| 1200        | CakSNP1200     | <i>Kabuli</i>    | Ca_Kabuli_Chr01              | 12566565                       | (C/T)       |
| 1201        | CakSNP1201     | <i>Kabuli</i>    | Ca_Kabuli_Chr01              | 12566579                       | (C/T)       |
| 1202        | CakSNP1202     | <i>Kabuli</i>    | Ca_Kabuli_Chr01              | 12566607                       | (T/C)       |
| 1203        | CakSNP1203     | <i>Kabuli</i>    | Ca_Kabuli_Chr01              | 12566615                       | (C/T)       |
| 1204        | CakSNP1204     | <i>Kabuli</i>    | Ca_Kabuli_Chr01              | 12566641                       | (T/C)       |
| 1205        | CakSNP1205     | <i>Kabuli</i>    | Ca_Kabuli_Chr01              | 12588525                       | (A/G)       |
| 1206        | CakSNP1206     | <i>Kabuli</i>    | Ca_Kabuli_Chr01              | 12597939                       | (A/T)       |
| 1207        | CakSNP1207     | <i>Kabuli</i>    | Ca_Kabuli_Chr01              | 12639552                       | (T/A)       |
| 1208        | CakSNP1208     | <i>Kabuli</i>    | Ca_Kabuli_Chr01              | 12639584                       | (T/C)       |
| 1209        | CakSNP1209     | <i>Kabuli</i>    | Ca_Kabuli_Chr01              | 12687506                       | (C/T)       |
| 1210        | CakSNP1210     | <i>Kabuli</i>    | Ca_Kabuli_Chr01              | 12688424                       | (A/G)       |
| 1211        | CakSNP1211     | <i>Kabuli</i>    | Ca_Kabuli_Chr01              | 12688435                       | (A/C)       |
| 1212        | CakSNP1212     | <i>Kabuli</i>    | Ca_Kabuli_Chr01              | 12704406                       | (G/T)       |
| 1213        | CakSNP1213     | <i>Kabuli</i>    | Ca_Kabuli_Chr01              | 12705665                       | (C/T)       |
| 1214        | CakSNP1214     | <i>Kabuli</i>    | Ca_Kabuli_Chr01              | 12705731                       | (G/A)       |
| 1215        | CakSNP1215     | <i>Kabuli</i>    | Ca_Kabuli_Chr01              | 12715427                       | (C/T)       |

| <b>S.N.</b> | <b>SNP IDs</b> | <b>Cultivars</b> | <b>Chromosomes/scaffolds</b> | <b>Physical positions (bp)</b> | <b>SNPs</b> |
|-------------|----------------|------------------|------------------------------|--------------------------------|-------------|
| 1216        | CakSNP1216     | <i>Kabuli</i>    | Ca_Kabuli_Chr01              | 12719734                       | (T/A)       |
| 1217        | CakSNP1217     | <i>Kabuli</i>    | Ca_Kabuli_Chr01              | 12719735                       | (G/T)       |
| 1218        | CakSNP1218     | <i>Kabuli</i>    | Ca_Kabuli_Chr01              | 12719752                       | (G/C)       |
| 1219        | CakSNP1219     | <i>Kabuli</i>    | Ca_Kabuli_Chr01              | 12736298                       | (A/G)       |
| 1220        | CakSNP1220     | <i>Kabuli</i>    | Ca_Kabuli_Chr01              | 12736353                       | (A/C)       |
| 1221        | CakSNP1221     | <i>Kabuli</i>    | Ca_Kabuli_Chr01              | 12736622                       | (T/G)       |
| 1222        | CakSNP1222     | <i>Kabuli</i>    | Ca_Kabuli_Chr01              | 12738564                       | (C/T)       |
| 1223        | CakSNP1223     | <i>Kabuli</i>    | Ca_Kabuli_Chr01              | 12754422                       | (G/T)       |
| 1224        | CakSNP1224     | <i>Kabuli</i>    | Ca_Kabuli_Chr01              | 12794075                       | (C/A)       |
| 1225        | CakSNP1225     | <i>Kabuli</i>    | Ca_Kabuli_Chr01              | 12794147                       | (G/T)       |
| 1226        | CakSNP1226     | <i>Kabuli</i>    | Ca_Kabuli_Chr01              | 12794251                       | (A/C)       |
| 1227        | CakSNP1227     | <i>Kabuli</i>    | Ca_Kabuli_Chr01              | 12800638                       | (T/C)       |
| 1228        | CakSNP1228     | <i>Kabuli</i>    | Ca_Kabuli_Chr01              | 12800610                       | (A/C)       |
| 1229        | CakSNP1229     | <i>Kabuli</i>    | Ca_Kabuli_Chr01              | 12800607                       | (T/A)       |
| 1230        | CakSNP1230     | <i>Kabuli</i>    | Ca_Kabuli_Chr01              | 12800601                       | (T/A)       |
| 1231        | CakSNP1231     | <i>Kabuli</i>    | Ca_Kabuli_Chr01              | 12800597                       | (G/T)       |
| 1232        | CakSNP1232     | <i>Kabuli</i>    | Ca_Kabuli_Chr01              | 12831717                       | (G/T)       |
| 1233        | CakSNP1233     | <i>Kabuli</i>    | Ca_Kabuli_Chr01              | 12845445                       | (A/C)       |
| 1234        | CakSNP1234     | <i>Kabuli</i>    | Ca_Kabuli_Chr01              | 12875506                       | (G/A)       |
| 1235        | CakSNP1235     | <i>Kabuli</i>    | Ca_Kabuli_Chr01              | 12880408                       | (G/A)       |
| 1236        | CakSNP1236     | <i>Kabuli</i>    | Ca_Kabuli_Chr01              | 12912621                       | (C/T)       |
| 1237        | CakSNP1237     | <i>Kabuli</i>    | Ca_Kabuli_Chr01              | 12912625                       | (T/C)       |
| 1238        | CakSNP1238     | <i>Kabuli</i>    | Ca_Kabuli_Chr01              | 12912670                       | (C/T)       |
| 1239        | CakSNP1239     | <i>Kabuli</i>    | Ca_Kabuli_Chr01              | 12947377                       | (C/T)       |
| 1240        | CakSNP1240     | <i>Kabuli</i>    | Ca_Kabuli_Chr01              | 12947376                       | (C/T)       |
| 1241        | CakSNP1241     | <i>Kabuli</i>    | Ca_Kabuli_Chr01              | 12947358                       | (A/T)       |
| 1242        | CakSNP1242     | <i>Kabuli</i>    | Ca_Kabuli_Chr01              | 12947347                       | (A/G)       |
| 1243        | CakSNP1243     | <i>Kabuli</i>    | Ca_Kabuli_Chr01              | 12992445                       | (A/C)       |
| 1244        | CakSNP1244     | <i>Kabuli</i>    | Ca_Kabuli_Chr01              | 12992423                       | (A/C)       |
| 1245        | CakSNP1245     | <i>Kabuli</i>    | Ca_Kabuli_Chr01              | 12992569                       | (A/G)       |
| 1246        | CakSNP1246     | <i>Kabuli</i>    | Ca_Kabuli_Chr01              | 13028543                       | (T/C)       |
| 1247        | CakSNP1247     | <i>Kabuli</i>    | Ca_Kabuli_Chr01              | 13028517                       | (G/A)       |
| 1248        | CakSNP1248     | <i>Kabuli</i>    | Ca_Kabuli_Chr01              | 13028505                       | (A/G)       |
| 1249        | CakSNP1249     | <i>Kabuli</i>    | Ca_Kabuli_Chr01              | 13034708                       | (T/G)       |
| 1250        | CakSNP1250     | <i>Kabuli</i>    | Ca_Kabuli_Chr01              | 13034810                       | (G/A)       |
| 1251        | CakSNP1251     | <i>Kabuli</i>    | Ca_Kabuli_Chr01              | 13040664                       | (T/C)       |
| 1252        | CakSNP1252     | <i>Kabuli</i>    | Ca_Kabuli_Chr01              | 13066954                       | (C/T)       |
| 1253        | CakSNP1253     | <i>Kabuli</i>    | Ca_Kabuli_Chr01              | 13066968                       | (C/G)       |

| <b>S.N.</b> | <b>SNP IDs</b> | <b>Cultivars</b> | <b>Chromosomes/scaffolds</b> | <b>Physical positions (bp)</b> | <b>SNPs</b> |
|-------------|----------------|------------------|------------------------------|--------------------------------|-------------|
| 1254        | CakSNP1254     | <i>Kabuli</i>    | Ca_Kabuli_Chr01              | 13076647                       | (T/A)       |
| 1255        | CakSNP1255     | <i>Kabuli</i>    | Ca_Kabuli_Chr01              | 13076695                       | (G/A)       |
| 1256        | CakSNP1256     | <i>Kabuli</i>    | Ca_Kabuli_Chr01              | 13156473                       | (A/C)       |
| 1257        | CakSNP1257     | <i>Kabuli</i>    | Ca_Kabuli_Chr01              | 13158244                       | (C/T)       |
| 1258        | CakSNP1258     | <i>Kabuli</i>    | Ca_Kabuli_Chr01              | 13158201                       | (C/T)       |
| 1259        | CakSNP1259     | <i>Kabuli</i>    | Ca_Kabuli_Chr01              | 13158192                       | (T/C)       |
| 1260        | CakSNP1260     | <i>Kabuli</i>    | Ca_Kabuli_Chr01              | 13199761                       | (T/A)       |
| 1261        | CakSNP1261     | <i>Kabuli</i>    | Ca_Kabuli_Chr01              | 13202986                       | (T/G)       |
| 1262        | CakSNP1262     | <i>Kabuli</i>    | Ca_Kabuli_Chr01              | 13202991                       | (T/G)       |
| 1263        | CakSNP1263     | <i>Kabuli</i>    | Ca_Kabuli_Chr01              | 13216776                       | (G/T)       |
| 1264        | CakSNP1264     | <i>Kabuli</i>    | Ca_Kabuli_Chr01              | 13216741                       | (T/A)       |
| 1265        | CakSNP1265     | <i>Kabuli</i>    | Ca_Kabuli_Chr01              | 13216710                       | (G/A)       |
| 1266        | CakSNP1266     | <i>Kabuli</i>    | Ca_Kabuli_Chr01              | 13267896                       | (T/C)       |
| 1267        | CakSNP1267     | <i>Kabuli</i>    | Ca_Kabuli_Chr01              | 13282556                       | (A/G)       |
| 1268        | CakSNP1268     | <i>Kabuli</i>    | Ca_Kabuli_Chr01              | 13282552                       | (T/C)       |
| 1269        | CakSNP1269     | <i>Kabuli</i>    | Ca_Kabuli_Chr01              | 13316992                       | (C/A)       |
| 1270        | CakSNP1270     | <i>Kabuli</i>    | Ca_Kabuli_Chr01              | 13331955                       | (T/A)       |
| 1271        | CakSNP1271     | <i>Kabuli</i>    | Ca_Kabuli_Chr01              | 13331941                       | (C/T)       |
| 1272        | CakSNP1272     | <i>Kabuli</i>    | Ca_Kabuli_Chr01              | 13332015                       | (C/A)       |
| 1273        | CakSNP1273     | <i>Kabuli</i>    | Ca_Kabuli_Chr01              | 13332025                       | (T/G)       |
| 1274        | CakSNP1274     | <i>Kabuli</i>    | Ca_Kabuli_Chr01              | 13365594                       | (T/A)       |
| 1275        | CakSNP1275     | <i>Kabuli</i>    | Ca_Kabuli_Chr01              | 13365625                       | (C/G)       |
| 1276        | CakSNP1276     | <i>Kabuli</i>    | Ca_Kabuli_Chr01              | 13368341                       | (G/A)       |
| 1277        | CakSNP1277     | <i>Kabuli</i>    | Ca_Kabuli_Chr01              | 13368556                       | (T/A)       |
| 1278        | CakSNP1278     | <i>Kabuli</i>    | Ca_Kabuli_Chr01              | 13369730                       | (G/A)       |
| 1279        | CakSNP1279     | <i>Kabuli</i>    | Ca_Kabuli_Chr01              | 13369986                       | (C/A)       |
| 1280        | CakSNP1280     | <i>Kabuli</i>    | Ca_Kabuli_Chr01              | 13497572                       | (G/T)       |
| 1281        | CakSNP1281     | <i>Kabuli</i>    | Ca_Kabuli_Chr01              | 13549635                       | (T/C)       |
| 1282        | CakSNP1282     | <i>Kabuli</i>    | Ca_Kabuli_Chr01              | 13550600                       | (G/A)       |
| 1283        | CakSNP1283     | <i>Kabuli</i>    | Ca_Kabuli_Chr01              | 13560364                       | (T/G)       |
| 1284        | CakSNP1284     | <i>Kabuli</i>    | Ca_Kabuli_Chr01              | 13590903                       | (G/T)       |
| 1285        | CakSNP1285     | <i>Kabuli</i>    | Ca_Kabuli_Chr01              | 13591177                       | (G/A)       |
| 1286        | CakSNP1286     | <i>Kabuli</i>    | Ca_Kabuli_Chr01              | 13591203                       | (C/G)       |
| 1287        | CakSNP1287     | <i>Kabuli</i>    | Ca_Kabuli_Chr01              | 13591314                       | (C/T)       |
| 1288        | CakSNP1288     | <i>Kabuli</i>    | Ca_Kabuli_Chr01              | 13593931                       | (T/A)       |
| 1289        | CakSNP1289     | <i>Kabuli</i>    | Ca_Kabuli_Chr01              | 13596411                       | (G/T)       |
| 1290        | CakSNP1290     | <i>Kabuli</i>    | Ca_Kabuli_Chr01              | 13596528                       | (T/A)       |
| 1291        | CakSNP1291     | <i>Kabuli</i>    | Ca_Kabuli_Chr01              | 13596539                       | (A/G)       |

| <b>S.N.</b> | <b>SNP IDs</b> | <b>Cultivars</b> | <b>Chromosomes/scaffolds</b> | <b>Physical positions (bp)</b> | <b>SNPs</b> |
|-------------|----------------|------------------|------------------------------|--------------------------------|-------------|
| 1292        | CakSNP1292     | <i>Kabuli</i>    | Ca_Kabuli_Chr01              | 13596666                       | (T/A)       |
| 1293        | CakSNP1293     | <i>Kabuli</i>    | Ca_Kabuli_Chr01              | 13596659                       | (T/A)       |
| 1294        | CakSNP1294     | <i>Kabuli</i>    | Ca_Kabuli_Chr01              | 13596631                       | (C/T)       |
| 1295        | CakSNP1295     | <i>Kabuli</i>    | Ca_Kabuli_Chr01              | 13596621                       | (C/T)       |
| 1296        | CakSNP1296     | <i>Kabuli</i>    | Ca_Kabuli_Chr01              | 13596741                       | (C/T)       |
| 1297        | CakSNP1297     | <i>Kabuli</i>    | Ca_Kabuli_Chr01              | 13596771                       | (C/A)       |
| 1298        | CakSNP1298     | <i>Kabuli</i>    | Ca_Kabuli_Chr01              | 13607486                       | (A/C)       |
| 1299        | CakSNP1299     | <i>Kabuli</i>    | Ca_Kabuli_Chr01              | 13608414                       | (T/C)       |
| 1300        | CakSNP1300     | <i>Kabuli</i>    | Ca_Kabuli_Chr01              | 13637705                       | (G/T)       |
| 1301        | CakSNP1301     | <i>Kabuli</i>    | Ca_Kabuli_Chr01              | 13637688                       | (A/G)       |
| 1302        | CakSNP1302     | <i>Kabuli</i>    | Ca_Kabuli_Chr01              | 13637687                       | (C/T)       |
| 1303        | CakSNP1303     | <i>Kabuli</i>    | Ca_Kabuli_Chr01              | 13637684                       | (C/T)       |
| 1304        | CakSNP1304     | <i>Kabuli</i>    | Ca_Kabuli_Chr01              | 13639157                       | (T/C)       |
| 1305        | CakSNP1305     | <i>Kabuli</i>    | Ca_Kabuli_Chr01              | 13641517                       | (A/G)       |
| 1306        | CakSNP1306     | <i>Kabuli</i>    | Ca_Kabuli_Chr01              | 13641644                       | (G/A)       |
| 1307        | CakSNP1307     | <i>Kabuli</i>    | Ca_Kabuli_Chr01              | 13641615                       | (A/G)       |
| 1308        | CakSNP1308     | <i>Kabuli</i>    | Ca_Kabuli_Chr01              | 13641608                       | (G/T)       |
| 1309        | CakSNP1309     | <i>Kabuli</i>    | Ca_Kabuli_Chr01              | 13641574                       | (A/C)       |
| 1310        | CakSNP1310     | <i>Kabuli</i>    | Ca_Kabuli_Chr01              | 13641564                       | (G/A)       |
| 1311        | CakSNP1311     | <i>Kabuli</i>    | Ca_Kabuli_Chr01              | 13668759                       | (T/A)       |
| 1312        | CakSNP1312     | <i>Kabuli</i>    | Ca_Kabuli_Chr01              | 13680002                       | (G/T)       |
| 1313        | CakSNP1313     | <i>Kabuli</i>    | Ca_Kabuli_Chr01              | 13680008                       | (G/C)       |
| 1314        | CakSNP1314     | <i>Kabuli</i>    | Ca_Kabuli_Chr01              | 13762410                       | (C/A)       |
| 1315        | CakSNP1315     | <i>Kabuli</i>    | Ca_Kabuli_Chr01              | 13769805                       | (C/T)       |
| 1316        | CakSNP1316     | <i>Kabuli</i>    | Ca_Kabuli_Chr01              | 13769771                       | (T/C)       |
| 1317        | CakSNP1317     | <i>Kabuli</i>    | Ca_Kabuli_Chr01              | 13782049                       | (C/T)       |
| 1318        | CakSNP1318     | <i>Kabuli</i>    | Ca_Kabuli_Chr01              | 13814790                       | (T/C)       |
| 1319        | CakSNP1319     | <i>Kabuli</i>    | Ca_Kabuli_Chr01              | 13828703                       | (C/T)       |
| 1320        | CakSNP1320     | <i>Kabuli</i>    | Ca_Kabuli_Chr01              | 13828659                       | (G/A)       |
| 1321        | CakSNP1321     | <i>Kabuli</i>    | Ca_Kabuli_Chr01              | 13828657                       | (G/A)       |
| 1322        | CakSNP1322     | <i>Kabuli</i>    | Ca_Kabuli_Chr01              | 13828744                       | (A/T)       |
| 1323        | CakSNP1323     | <i>Kabuli</i>    | Ca_Kabuli_Chr01              | 13991356                       | (T/G)       |
| 1324        | CakSNP1324     | <i>Kabuli</i>    | Ca_Kabuli_Chr01              | 14014566                       | (C/A)       |
| 1325        | CakSNP1325     | <i>Kabuli</i>    | Ca_Kabuli_Chr01              | 14015757                       | (T/C)       |
| 1326        | CakSNP1326     | <i>Kabuli</i>    | Ca_Kabuli_Chr01              | 14015781                       | (G/C)       |
| 1327        | CakSNP1327     | <i>Kabuli</i>    | Ca_Kabuli_Chr01              | 14015818                       | (C/T)       |
| 1328        | CakSNP1328     | <i>Kabuli</i>    | Ca_Kabuli_Chr01              | 14022892                       | (C/A)       |
| 1329        | CakSNP1329     | <i>Kabuli</i>    | Ca_Kabuli_Chr01              | 14022890                       | (A/T)       |

| <b>S.N.</b> | <b>SNP IDs</b> | <b>Cultivars</b> | <b>Chromosomes/scaffolds</b> | <b>Physical positions (bp)</b> | <b>SNPs</b> |
|-------------|----------------|------------------|------------------------------|--------------------------------|-------------|
| 1330        | CakSNP1330     | <i>Kabuli</i>    | Ca_Kabuli_Chr01              | 14023097                       | (A/C)       |
| 1331        | CakSNP1331     | <i>Kabuli</i>    | Ca_Kabuli_Chr01              | 14023095                       | (T/A)       |
| 1332        | CakSNP1332     | <i>Kabuli</i>    | Ca_Kabuli_Chr01              | 14023078                       | (T/A)       |
| 1333        | CakSNP1333     | <i>Kabuli</i>    | Ca_Kabuli_Chr01              | 14025015                       | (G/A)       |
| 1334        | CakSNP1334     | <i>Kabuli</i>    | Ca_Kabuli_Chr01              | 14025075                       | (A/G)       |
| 1335        | CakSNP1335     | <i>Kabuli</i>    | Ca_Kabuli_Chr01              | 14026347                       | (C/G)       |
| 1336        | CakSNP1336     | <i>Kabuli</i>    | Ca_Kabuli_Chr01              | 14026391                       | (T/C)       |
| 1337        | CakSNP1337     | <i>Kabuli</i>    | Ca_Kabuli_Chr01              | 14026467                       | (C/T)       |
| 1338        | CakSNP1338     | <i>Kabuli</i>    | Ca_Kabuli_Chr01              | 14026444                       | (G/T)       |
| 1339        | CakSNP1339     | <i>Kabuli</i>    | Ca_Kabuli_Chr01              | 14026437                       | (C/A)       |
| 1340        | CakSNP1340     | <i>Kabuli</i>    | Ca_Kabuli_Chr01              | 14033226                       | (C/T)       |
| 1341        | CakSNP1341     | <i>Kabuli</i>    | Ca_Kabuli_Chr01              | 14033285                       | (C/T)       |
| 1342        | CakSNP1342     | <i>Kabuli</i>    | Ca_Kabuli_Chr01              | 14033277                       | (G/C)       |
| 1343        | CakSNP1343     | <i>Kabuli</i>    | Ca_Kabuli_Chr01              | 14033951                       | (G/A)       |
| 1344        | CakSNP1344     | <i>Kabuli</i>    | Ca_Kabuli_Chr01              | 14034011                       | (A/G)       |
| 1345        | CakSNP1345     | <i>Kabuli</i>    | Ca_Kabuli_Chr01              | 14045110                       | (T/C)       |
| 1346        | CakSNP1346     | <i>Kabuli</i>    | Ca_Kabuli_Chr01              | 14045239                       | (A/G)       |
| 1347        | CakSNP1347     | <i>Kabuli</i>    | Ca_Kabuli_Chr01              | 14076924                       | (T/C)       |
| 1348        | CakSNP1348     | <i>Kabuli</i>    | Ca_Kabuli_Chr01              | 14101608                       | (C/T)       |
| 1349        | CakSNP1349     | <i>Kabuli</i>    | Ca_Kabuli_Chr01              | 14101621                       | (T/C)       |
| 1350        | CakSNP1350     | <i>Kabuli</i>    | Ca_Kabuli_Chr01              | 14101624                       | (C/T)       |
| 1351        | CakSNP1351     | <i>Kabuli</i>    | Ca_Kabuli_Chr01              | 14101644                       | (A/G)       |
| 1352        | CakSNP1352     | <i>Kabuli</i>    | Ca_Kabuli_Chr01              | 14163638                       | (C/T)       |
| 1353        | CakSNP1353     | <i>Kabuli</i>    | Ca_Kabuli_Chr01              | 14163721                       | (T/C)       |
| 1354        | CakSNP1354     | <i>Kabuli</i>    | Ca_Kabuli_Chr01              | 14163836                       | (A/C)       |
| 1355        | CakSNP1355     | <i>Kabuli</i>    | Ca_Kabuli_Chr01              | 14225210                       | (G/T)       |
| 1356        | CakSNP1356     | <i>Kabuli</i>    | Ca_Kabuli_Chr01              | 14237163                       | (T/G)       |
| 1357        | CakSNP1357     | <i>Kabuli</i>    | Ca_Kabuli_Chr01              | 14237164                       | (T/A)       |
| 1358        | CakSNP1358     | <i>Kabuli</i>    | Ca_Kabuli_Chr01              | 14237273                       | (A/T)       |
| 1359        | CakSNP1359     | <i>Kabuli</i>    | Ca_Kabuli_Chr01              | 14240571                       | (C/T)       |
| 1360        | CakSNP1360     | <i>Kabuli</i>    | Ca_Kabuli_Chr01              | 14259435                       | (G/C)       |
| 1361        | CakSNP1361     | <i>Kabuli</i>    | Ca_Kabuli_Chr01              | 14259455                       | (A/G)       |
| 1362        | CakSNP1362     | <i>Kabuli</i>    | Ca_Kabuli_Chr01              | 14281643                       | (T/C)       |
| 1363        | CakSNP1363     | <i>Kabuli</i>    | Ca_Kabuli_Chr01              | 14348207                       | (C/T)       |
| 1364        | CakSNP1364     | <i>Kabuli</i>    | Ca_Kabuli_Chr01              | 14393255                       | (A/G)       |
| 1365        | CakSNP1365     | <i>Kabuli</i>    | Ca_Kabuli_Chr01              | 14393313                       | (C/A)       |
| 1366        | CakSNP1366     | <i>Kabuli</i>    | Ca_Kabuli_Chr01              | 14459908                       | (T/C)       |
| 1367        | CakSNP1367     | <i>Kabuli</i>    | Ca_Kabuli_Chr01              | 14576525                       | (C/T)       |

| <b>S.N.</b> | <b>SNP IDs</b> | <b>Cultivars</b> | <b>Chromosomes/scaffolds</b> | <b>Physical positions (bp)</b> | <b>SNPs</b> |
|-------------|----------------|------------------|------------------------------|--------------------------------|-------------|
| 1368        | CakSNP1368     | <i>Kabuli</i>    | Ca_Kabuli_Chr01              | 14623271                       | (T/C)       |
| 1369        | CakSNP1369     | <i>Kabuli</i>    | Ca_Kabuli_Chr01              | 14698461                       | (A/T)       |
| 1370        | CakSNP1370     | <i>Kabuli</i>    | Ca_Kabuli_Chr01              | 14801406                       | (A/G)       |
| 1371        | CakSNP1371     | <i>Kabuli</i>    | Ca_Kabuli_Chr01              | 14884940                       | (G/T)       |
| 1372        | CakSNP1372     | <i>Kabuli</i>    | Ca_Kabuli_Chr01              | 14916633                       | (G/C)       |
| 1373        | CakSNP1373     | <i>Kabuli</i>    | Ca_Kabuli_Chr01              | 15126244                       | (T/C)       |
| 1374        | CakSNP1374     | <i>Kabuli</i>    | Ca_Kabuli_Chr01              | 15137319                       | (C/T)       |
| 1375        | CakSNP1375     | <i>Kabuli</i>    | Ca_Kabuli_Chr01              | 15146123                       | (A/G)       |
| 1376        | CakSNP1376     | <i>Kabuli</i>    | Ca_Kabuli_Chr01              | 15146149                       | (G/A)       |
| 1377        | CakSNP1377     | <i>Kabuli</i>    | Ca_Kabuli_Chr01              | 15167641                       | (T/C)       |
| 1378        | CakSNP1378     | <i>Kabuli</i>    | Ca_Kabuli_Chr01              | 15167643                       | (G/A)       |
| 1379        | CakSNP1379     | <i>Kabuli</i>    | Ca_Kabuli_Chr01              | 15196154                       | (T/A)       |
| 1380        | CakSNP1380     | <i>Kabuli</i>    | Ca_Kabuli_Chr01              | 15236202                       | (A/G)       |
| 1381        | CakSNP1381     | <i>Kabuli</i>    | Ca_Kabuli_Chr01              | 15253283                       | (G/A)       |
| 1382        | CakSNP1382     | <i>Kabuli</i>    | Ca_Kabuli_Chr01              | 15253285                       | (A/G)       |
| 1383        | CakSNP1383     | <i>Kabuli</i>    | Ca_Kabuli_Chr01              | 15291748                       | (C/T)       |
| 1384        | CakSNP1384     | <i>Kabuli</i>    | Ca_Kabuli_Chr01              | 15319181                       | (T/C)       |
| 1385        | CakSNP1385     | <i>Kabuli</i>    | Ca_Kabuli_Chr01              | 15611784                       | (T/C)       |
| 1386        | CakSNP1386     | <i>Kabuli</i>    | Ca_Kabuli_Chr01              | 15613071                       | (A/C)       |
| 1387        | CakSNP1387     | <i>Kabuli</i>    | Ca_Kabuli_Chr01              | 15683091                       | (G/A)       |
| 1388        | CakSNP1388     | <i>Kabuli</i>    | Ca_Kabuli_Chr01              | 15683101                       | (A/C)       |
| 1389        | CakSNP1389     | <i>Kabuli</i>    | Ca_Kabuli_Chr01              | 15683106                       | (C/A)       |
| 1390        | CakSNP1390     | <i>Kabuli</i>    | Ca_Kabuli_Chr01              | 15683117                       | (G/T)       |
| 1391        | CakSNP1391     | <i>Kabuli</i>    | Ca_Kabuli_Chr01              | 15683138                       | (A/G)       |
| 1392        | CakSNP1392     | <i>Kabuli</i>    | Ca_Kabuli_Chr01              | 15760638                       | (C/A)       |
| 1393        | CakSNP1393     | <i>Kabuli</i>    | Ca_Kabuli_Chr01              | 15784021                       | (C/T)       |
| 1394        | CakSNP1394     | <i>Kabuli</i>    | Ca_Kabuli_Chr01              | 15802393                       | (G/A)       |
| 1395        | CakSNP1395     | <i>Kabuli</i>    | Ca_Kabuli_Chr01              | 15862493                       | (C/T)       |
| 1396        | CakSNP1396     | <i>Kabuli</i>    | Ca_Kabuli_Chr01              | 15960425                       | (A/C)       |
| 1397        | CakSNP1397     | <i>Kabuli</i>    | Ca_Kabuli_Chr01              | 15965278                       | (G/A)       |
| 1398        | CakSNP1398     | <i>Kabuli</i>    | Ca_Kabuli_Chr01              | 16061242                       | (A/G)       |
| 1399        | CakSNP1399     | <i>Kabuli</i>    | Ca_Kabuli_Chr01              | 16061293                       | (C/G)       |
| 1400        | CakSNP1400     | <i>Kabuli</i>    | Ca_Kabuli_Chr01              | 16061294                       | (T/A)       |
| 1401        | CakSNP1401     | <i>Kabuli</i>    | Ca_Kabuli_Chr01              | 16061295                       | (A/G)       |
| 1402        | CakSNP1402     | <i>Kabuli</i>    | Ca_Kabuli_Chr01              | 16061300                       | (A/G)       |
| 1403        | CakSNP1403     | <i>Kabuli</i>    | Ca_Kabuli_Chr01              | 16061385                       | (A/G)       |
| 1404        | CakSNP1404     | <i>Kabuli</i>    | Ca_Kabuli_Chr01              | 16061486                       | (G/A)       |
| 1405        | CakSNP1405     | <i>Kabuli</i>    | Ca_Kabuli_Chr01              | 16061541                       | (G/A)       |

| <b>S.N.</b> | <b>SNP IDs</b> | <b>Cultivars</b> | <b>Chromosomes/scaffolds</b> | <b>Physical positions (bp)</b> | <b>SNPs</b> |
|-------------|----------------|------------------|------------------------------|--------------------------------|-------------|
| 1406        | CakSNP1406     | <i>Kabuli</i>    | Ca_Kabuli_Chr01              | 16061536                       | (A/C)       |
| 1407        | CakSNP1407     | <i>Kabuli</i>    | Ca_Kabuli_Chr01              | 16081438                       | (T/C)       |
| 1408        | CakSNP1408     | <i>Kabuli</i>    | Ca_Kabuli_Chr01              | 16099437                       | (T/G)       |
| 1409        | CakSNP1409     | <i>Kabuli</i>    | Ca_Kabuli_Chr01              | 16099438                       | (G/A)       |
| 1410        | CakSNP1410     | <i>Kabuli</i>    | Ca_Kabuli_Chr01              | 16099468                       | (G/A)       |
| 1411        | CakSNP1411     | <i>Kabuli</i>    | Ca_Kabuli_Chr01              | 16099444                       | (T/C)       |
| 1412        | CakSNP1412     | <i>Kabuli</i>    | Ca_Kabuli_Chr01              | 16099459                       | (T/C)       |
| 1413        | CakSNP1413     | <i>Kabuli</i>    | Ca_Kabuli_Chr01              | 16099457                       | (T/C)       |
| 1414        | CakSNP1414     | <i>Kabuli</i>    | Ca_Kabuli_Chr01              | 16104255                       | (G/T)       |
| 1415        | CakSNP1415     | <i>Kabuli</i>    | Ca_Kabuli_Chr01              | 16104351                       | (G/A)       |
| 1416        | CakSNP1416     | <i>Kabuli</i>    | Ca_Kabuli_Chr01              | 16104334                       | (T/G)       |
| 1417        | CakSNP1417     | <i>Kabuli</i>    | Ca_Kabuli_Chr01              | 16104298                       | (C/T)       |
| 1418        | CakSNP1418     | <i>Kabuli</i>    | Ca_Kabuli_Chr01              | 16114607                       | (C/A)       |
| 1419        | CakSNP1419     | <i>Kabuli</i>    | Ca_Kabuli_Chr01              | 16196930                       | (A/G)       |
| 1420        | CakSNP1420     | <i>Kabuli</i>    | Ca_Kabuli_Chr01              | 16228049                       | (C/A)       |
| 1421        | CakSNP1421     | <i>Kabuli</i>    | Ca_Kabuli_Chr01              | 16228039                       | (C/A)       |
| 1422        | CakSNP1422     | <i>Kabuli</i>    | Ca_Kabuli_Chr01              | 16289397                       | (G/A)       |
| 1423        | CakSNP1423     | <i>Kabuli</i>    | Ca_Kabuli_Chr01              | 16329161                       | (G/A)       |
| 1424        | CakSNP1424     | <i>Kabuli</i>    | Ca_Kabuli_Chr01              | 16376254                       | (G/T)       |
| 1425        | CakSNP1425     | <i>Kabuli</i>    | Ca_Kabuli_Chr01              | 16379239                       | (A/G)       |
| 1426        | CakSNP1426     | <i>Kabuli</i>    | Ca_Kabuli_Chr01              | 16379258                       | (C/T)       |
| 1427        | CakSNP1427     | <i>Kabuli</i>    | Ca_Kabuli_Chr01              | 16410186                       | (C/T)       |
| 1428        | CakSNP1428     | <i>Kabuli</i>    | Ca_Kabuli_Chr01              | 16419469                       | (C/T)       |
| 1429        | CakSNP1429     | <i>Kabuli</i>    | Ca_Kabuli_Chr01              | 16454432                       | (C/T)       |
| 1430        | CakSNP1430     | <i>Kabuli</i>    | Ca_Kabuli_Chr01              | 16454487                       | (G/C)       |
| 1431        | CakSNP1431     | <i>Kabuli</i>    | Ca_Kabuli_Chr01              | 16493894                       | (A/G)       |
| 1432        | CakSNP1432     | <i>Kabuli</i>    | Ca_Kabuli_Chr01              | 16512011                       | (G/T)       |
| 1433        | CakSNP1433     | <i>Kabuli</i>    | Ca_Kabuli_Chr01              | 16512026                       | (C/T)       |
| 1434        | CakSNP1434     | <i>Kabuli</i>    | Ca_Kabuli_Chr01              | 16512171                       | (G/A)       |
| 1435        | CakSNP1435     | <i>Kabuli</i>    | Ca_Kabuli_Chr01              | 16512195                       | (G/A)       |
| 1436        | CakSNP1436     | <i>Kabuli</i>    | Ca_Kabuli_Chr01              | 16515112                       | (T/C)       |
| 1437        | CakSNP1437     | <i>Kabuli</i>    | Ca_Kabuli_Chr01              | 16527347                       | (T/A)       |
| 1438        | CakSNP1438     | <i>Kabuli</i>    | Ca_Kabuli_Chr01              | 16527366                       | (G/A)       |
| 1439        | CakSNP1439     | <i>Kabuli</i>    | Ca_Kabuli_Chr01              | 16575167                       | (A/G)       |
| 1440        | CakSNP1440     | <i>Kabuli</i>    | Ca_Kabuli_Chr01              | 16636587                       | (G/A)       |
| 1441        | CakSNP1441     | <i>Kabuli</i>    | Ca_Kabuli_Chr01              | 16743569                       | (C/T)       |
| 1442        | CakSNP1442     | <i>Kabuli</i>    | Ca_Kabuli_Chr01              | 16799112                       | (T/C)       |
| 1443        | CakSNP1443     | <i>Kabuli</i>    | Ca_Kabuli_Chr01              | 16799142                       | (C/T)       |



| <b>S.N.</b> | <b>SNP IDs</b> | <b>Cultivars</b> | <b>Chromosomes/scaffolds</b> | <b>Physical positions (bp)</b> | <b>SNPs</b> |
|-------------|----------------|------------------|------------------------------|--------------------------------|-------------|
| 1444        | CakSNP1444     | <i>Kabuli</i>    | Ca_Kabuli_Chr01              | 16813600                       | (T/A)       |
| 1445        | CakSNP1445     | <i>Kabuli</i>    | Ca_Kabuli_Chr01              | 16813603                       | (T/G)       |
| 1446        | CakSNP1446     | <i>Kabuli</i>    | Ca_Kabuli_Chr01              | 16813604                       | (T/C)       |
| 1447        | CakSNP1447     | <i>Kabuli</i>    | Ca_Kabuli_Chr01              | 16813657                       | (A/T)       |
| 1448        | CakSNP1448     | <i>Kabuli</i>    | Ca_Kabuli_Chr01              | 16813616                       | (T/A)       |
| 1449        | CakSNP1449     | <i>Kabuli</i>    | Ca_Kabuli_Chr01              | 16873356                       | (C/T)       |
| 1450        | CakSNP1450     | <i>Kabuli</i>    | Ca_Kabuli_Chr01              | 16877812                       | (C/A)       |
| 1451        | CakSNP1451     | <i>Kabuli</i>    | Ca_Kabuli_Chr01              | 16877829                       | (C/A)       |
| 1452        | CakSNP1452     | <i>Kabuli</i>    | Ca_Kabuli_Chr01              | 16883153                       | (C/T)       |
| 1453        | CakSNP1453     | <i>Kabuli</i>    | Ca_Kabuli_Chr01              | 16901798                       | (C/A)       |
| 1454        | CakSNP1454     | <i>Kabuli</i>    | Ca_Kabuli_Chr01              | 16902129                       | (G/A)       |
| 1455        | CakSNP1455     | <i>Kabuli</i>    | Ca_Kabuli_Chr01              | 16908636                       | (G/A)       |
| 1456        | CakSNP1456     | <i>Kabuli</i>    | Ca_Kabuli_Chr01              | 16933423                       | (T/G)       |
| 1457        | CakSNP1457     | <i>Kabuli</i>    | Ca_Kabuli_Chr01              | 16933431                       | (T/G)       |
| 1458        | CakSNP1458     | <i>Kabuli</i>    | Ca_Kabuli_Chr01              | 17006391                       | (T/C)       |
| 1459        | CakSNP1459     | <i>Kabuli</i>    | Ca_Kabuli_Chr01              | 17023111                       | (G/C)       |
| 1460        | CakSNP1460     | <i>Kabuli</i>    | Ca_Kabuli_Chr01              | 17024083                       | (A/C)       |
| 1461        | CakSNP1461     | <i>Kabuli</i>    | Ca_Kabuli_Chr01              | 17068798                       | (A/C)       |
| 1462        | CakSNP1462     | <i>Kabuli</i>    | Ca_Kabuli_Chr01              | 17092204                       | (C/T)       |
| 1463        | CakSNP1463     | <i>Kabuli</i>    | Ca_Kabuli_Chr01              | 17092404                       | (G/A)       |
| 1464        | CakSNP1464     | <i>Kabuli</i>    | Ca_Kabuli_Chr01              | 17092413                       | (C/T)       |
| 1465        | CakSNP1465     | <i>Kabuli</i>    | Ca_Kabuli_Chr01              | 17093640                       | (T/C)       |
| 1466        | CakSNP1466     | <i>Kabuli</i>    | Ca_Kabuli_Chr01              | 17167019                       | (G/A)       |
| 1467        | CakSNP1467     | <i>Kabuli</i>    | Ca_Kabuli_Chr01              | 17170443                       | (A/T)       |
| 1468        | CakSNP1468     | <i>Kabuli</i>    | Ca_Kabuli_Chr01              | 17170727                       | (T/C)       |
| 1469        | CakSNP1469     | <i>Kabuli</i>    | Ca_Kabuli_Chr01              | 17182711                       | (C/T)       |
| 1470        | CakSNP1470     | <i>Kabuli</i>    | Ca_Kabuli_Chr01              | 17182697                       | (A/T)       |
| 1471        | CakSNP1471     | <i>Kabuli</i>    | Ca_Kabuli_Chr01              | 17182867                       | (G/A)       |
| 1472        | CakSNP1472     | <i>Kabuli</i>    | Ca_Kabuli_Chr01              | 17194835                       | (C/T)       |
| 1473        | CakSNP1473     | <i>Kabuli</i>    | Ca_Kabuli_Chr01              | 17272338                       | (A/C)       |
| 1474        | CakSNP1474     | <i>Kabuli</i>    | Ca_Kabuli_Chr01              | 17272401                       | (C/T)       |
| 1475        | CakSNP1475     | <i>Kabuli</i>    | Ca_Kabuli_Chr01              | 17314880                       | (A/C)       |
| 1476        | CakSNP1476     | <i>Kabuli</i>    | Ca_Kabuli_Chr01              | 17314911                       | (A/G)       |
| 1477        | CakSNP1477     | <i>Kabuli</i>    | Ca_Kabuli_Chr01              | 17314945                       | (T/C)       |
| 1478        | CakSNP1478     | <i>Kabuli</i>    | Ca_Kabuli_Chr01              | 17315046                       | (G/A)       |
| 1479        | CakSNP1479     | <i>Kabuli</i>    | Ca_Kabuli_Chr01              | 17328721                       | (G/A)       |
| 1480        | CakSNP1480     | <i>Kabuli</i>    | Ca_Kabuli_Chr01              | 17328808                       | (G/A)       |
| 1481        | CakSNP1481     | <i>Kabuli</i>    | Ca_Kabuli_Chr01              | 17332981                       | (C/T)       |

| <b>S.N.</b> | <b>SNP IDs</b> | <b>Cultivars</b> | <b>Chromosomes/scaffolds</b> | <b>Physical positions (bp)</b> | <b>SNPs</b> |
|-------------|----------------|------------------|------------------------------|--------------------------------|-------------|
| 1482        | CakSNP1482     | <i>Kabuli</i>    | Ca_Kabuli_Chr01              | 17333056                       | (C/G)       |
| 1483        | CakSNP1483     | <i>Kabuli</i>    | Ca_Kabuli_Chr01              | 17333049                       | (C/T)       |
| 1484        | CakSNP1484     | <i>Kabuli</i>    | Ca_Kabuli_Chr01              | 17340321                       | (T/C)       |
| 1485        | CakSNP1485     | <i>Kabuli</i>    | Ca_Kabuli_Chr01              | 17340350                       | (G/T)       |
| 1486        | CakSNP1486     | <i>Kabuli</i>    | Ca_Kabuli_Chr01              | 17340398                       | (G/T)       |
| 1487        | CakSNP1487     | <i>Kabuli</i>    | Ca_Kabuli_Chr01              | 17359712                       | (A/G)       |
| 1488        | CakSNP1488     | <i>Kabuli</i>    | Ca_Kabuli_Chr01              | 17359688                       | (A/C)       |
| 1489        | CakSNP1489     | <i>Kabuli</i>    | Ca_Kabuli_Chr01              | 17359686                       | (C/T)       |
| 1490        | CakSNP1490     | <i>Kabuli</i>    | Ca_Kabuli_Chr01              | 17359682                       | (A/C)       |
| 1491        | CakSNP1491     | <i>Kabuli</i>    | Ca_Kabuli_Chr01              | 17386549                       | (C/T)       |
| 1492        | CakSNP1492     | <i>Kabuli</i>    | Ca_Kabuli_Chr01              | 17386603                       | (A/T)       |
| 1493        | CakSNP1493     | <i>Kabuli</i>    | Ca_Kabuli_Chr01              | 17395543                       | (C/A)       |
| 1494        | CakSNP1494     | <i>Kabuli</i>    | Ca_Kabuli_Chr01              | 17437336                       | (G/C)       |
| 1495        | CakSNP1495     | <i>Kabuli</i>    | Ca_Kabuli_Chr01              | 17558885                       | (T/C)       |
| 1496        | CakSNP1496     | <i>Kabuli</i>    | Ca_Kabuli_Chr01              | 17558940                       | (A/G)       |
| 1497        | CakSNP1497     | <i>Kabuli</i>    | Ca_Kabuli_Chr01              | 17558975                       | (A/G)       |
| 1498        | CakSNP1498     | <i>Kabuli</i>    | Ca_Kabuli_Chr01              | 17576793                       | (T/G)       |
| 1499        | CakSNP1499     | <i>Kabuli</i>    | Ca_Kabuli_Chr01              | 17761244                       | (T/C)       |
| 1500        | CakSNP1500     | <i>Kabuli</i>    | Ca_Kabuli_Chr01              | 17763949                       | (G/A)       |
| 1501        | CakSNP1501     | <i>Kabuli</i>    | Ca_Kabuli_Chr01              | 17819374                       | (A/C)       |
| 1502        | CakSNP1502     | <i>Kabuli</i>    | Ca_Kabuli_Chr01              | 17856892                       | (A/G)       |
| 1503        | CakSNP1503     | <i>Kabuli</i>    | Ca_Kabuli_Chr01              | 17857089                       | (T/A)       |
| 1504        | CakSNP1504     | <i>Kabuli</i>    | Ca_Kabuli_Chr01              | 17880143                       | (T/C)       |
| 1505        | CakSNP1505     | <i>Kabuli</i>    | Ca_Kabuli_Chr01              | 17880185                       | (T/C)       |
| 1506        | CakSNP1506     | <i>Kabuli</i>    | Ca_Kabuli_Chr01              | 17961779                       | (T/C)       |
| 1507        | CakSNP1507     | <i>Kabuli</i>    | Ca_Kabuli_Chr01              | 17983301                       | (T/G)       |
| 1508        | CakSNP1508     | <i>Kabuli</i>    | Ca_Kabuli_Chr01              | 17983310                       | (T/G)       |
| 1509        | CakSNP1509     | <i>Kabuli</i>    | Ca_Kabuli_Chr01              | 18009665                       | (C/G)       |
| 1510        | CakSNP1510     | <i>Kabuli</i>    | Ca_Kabuli_Chr01              | 18050590                       | (G/T)       |
| 1511        | CakSNP1511     | <i>Kabuli</i>    | Ca_Kabuli_Chr01              | 18064930                       | (C/T)       |
| 1512        | CakSNP1512     | <i>Kabuli</i>    | Ca_Kabuli_Chr01              | 18065239                       | (T/C)       |
| 1513        | CakSNP1513     | <i>Kabuli</i>    | Ca_Kabuli_Chr01              | 18092704                       | (T/G)       |
| 1514        | CakSNP1514     | <i>Kabuli</i>    | Ca_Kabuli_Chr01              | 18092761                       | (C/T)       |
| 1515        | CakSNP1515     | <i>Kabuli</i>    | Ca_Kabuli_Chr01              | 18098516                       | (C/T)       |
| 1516        | CakSNP1516     | <i>Kabuli</i>    | Ca_Kabuli_Chr01              | 18099331                       | (C/T)       |
| 1517        | CakSNP1517     | <i>Kabuli</i>    | Ca_Kabuli_Chr01              | 18099334                       | (T/A)       |
| 1518        | CakSNP1518     | <i>Kabuli</i>    | Ca_Kabuli_Chr01              | 18112318                       | (A/G)       |
| 1519        | CakSNP1519     | <i>Kabuli</i>    | Ca_Kabuli_Chr01              | 18112353                       | (T/C)       |

| <b>S.N.</b> | <b>SNP IDs</b> | <b>Cultivars</b> | <b>Chromosomes/scaffolds</b> | <b>Physical positions (bp)</b> | <b>SNPs</b> |
|-------------|----------------|------------------|------------------------------|--------------------------------|-------------|
| 1520        | CakSNP1520     | <i>Kabuli</i>    | Ca_Kabuli_Chr01              | 18131516                       | (T/G)       |
| 1521        | CakSNP1521     | <i>Kabuli</i>    | Ca_Kabuli_Chr01              | 18131545                       | (A/T)       |
| 1522        | CakSNP1522     | <i>Kabuli</i>    | Ca_Kabuli_Chr01              | 18131898                       | (G/A)       |
| 1523        | CakSNP1523     | <i>Kabuli</i>    | Ca_Kabuli_Chr01              | 18141990                       | (C/A)       |
| 1524        | CakSNP1524     | <i>Kabuli</i>    | Ca_Kabuli_Chr01              | 18144107                       | (C/G)       |
| 1525        | CakSNP1525     | <i>Kabuli</i>    | Ca_Kabuli_Chr01              | 18144137                       | (T/A)       |
| 1526        | CakSNP1526     | <i>Kabuli</i>    | Ca_Kabuli_Chr01              | 18147011                       | (C/G)       |
| 1527        | CakSNP1527     | <i>Kabuli</i>    | Ca_Kabuli_Chr01              | 18150151                       | (G/A)       |
| 1528        | CakSNP1528     | <i>Kabuli</i>    | Ca_Kabuli_Chr01              | 18153870                       | (T/G)       |
| 1529        | CakSNP1529     | <i>Kabuli</i>    | Ca_Kabuli_Chr01              | 18154083                       | (A/G)       |
| 1530        | CakSNP1530     | <i>Kabuli</i>    | Ca_Kabuli_Chr01              | 18156634                       | (A/G)       |
| 1531        | CakSNP1531     | <i>Kabuli</i>    | Ca_Kabuli_Chr01              | 18172762                       | (G/T)       |
| 1532        | CakSNP1532     | <i>Kabuli</i>    | Ca_Kabuli_Chr01              | 18198444                       | (C/T)       |
| 1533        | CakSNP1533     | <i>Kabuli</i>    | Ca_Kabuli_Chr01              | 18488172                       | (G/A)       |
| 1534        | CakSNP1534     | <i>Kabuli</i>    | Ca_Kabuli_Chr01              | 18746045                       | (T/G)       |
| 1535        | CakSNP1535     | <i>Kabuli</i>    | Ca_Kabuli_Chr01              | 18763916                       | (G/A)       |
| 1536        | CakSNP1536     | <i>Kabuli</i>    | Ca_Kabuli_Chr01              | 18763911                       | (C/A)       |
| 1537        | CakSNP1537     | <i>Kabuli</i>    | Ca_Kabuli_Chr01              | 18764225                       | (C/T)       |
| 1538        | CakSNP1538     | <i>Kabuli</i>    | Ca_Kabuli_Chr01              | 18768563                       | (C/A)       |
| 1539        | CakSNP1539     | <i>Kabuli</i>    | Ca_Kabuli_Chr01              | 18797330                       | (T/C)       |
| 1540        | CakSNP1540     | <i>Kabuli</i>    | Ca_Kabuli_Chr01              | 18890559                       | (A/G)       |
| 1541        | CakSNP1541     | <i>Kabuli</i>    | Ca_Kabuli_Chr01              | 18890616                       | (G/A)       |
| 1542        | CakSNP1542     | <i>Kabuli</i>    | Ca_Kabuli_Chr01              | 18890833                       | (G/A)       |
| 1543        | CakSNP1543     | <i>Kabuli</i>    | Ca_Kabuli_Chr01              | 18910213                       | (C/T)       |
| 1544        | CakSNP1544     | <i>Kabuli</i>    | Ca_Kabuli_Chr01              | 18910202                       | (G/A)       |
| 1545        | CakSNP1545     | <i>Kabuli</i>    | Ca_Kabuli_Chr01              | 18910173                       | (T/C)       |
| 1546        | CakSNP1546     | <i>Kabuli</i>    | Ca_Kabuli_Chr01              | 19000445                       | (T/C)       |
| 1547        | CakSNP1547     | <i>Kabuli</i>    | Ca_Kabuli_Chr01              | 19055085                       | (C/T)       |
| 1548        | CakSNP1548     | <i>Kabuli</i>    | Ca_Kabuli_Chr01              | 19130894                       | (T/C)       |
| 1549        | CakSNP1549     | <i>Kabuli</i>    | Ca_Kabuli_Chr01              | 19130884                       | (C/A)       |
| 1550        | CakSNP1550     | <i>Kabuli</i>    | Ca_Kabuli_Chr01              | 19130883                       | (C/A)       |
| 1551        | CakSNP1551     | <i>Kabuli</i>    | Ca_Kabuli_Chr01              | 19130872                       | (G/A)       |
| 1552        | CakSNP1552     | <i>Kabuli</i>    | Ca_Kabuli_Chr01              | 19130833                       | (G/T)       |
| 1553        | CakSNP1553     | <i>Kabuli</i>    | Ca_Kabuli_Chr01              | 19130831                       | (A/G)       |
| 1554        | CakSNP1554     | <i>Kabuli</i>    | Ca_Kabuli_Chr01              | 19130848                       | (C/T)       |
| 1555        | CakSNP1555     | <i>Kabuli</i>    | Ca_Kabuli_Chr01              | 19130853                       | (G/A)       |
| 1556        | CakSNP1556     | <i>Kabuli</i>    | Ca_Kabuli_Chr01              | 19164976                       | (T/C)       |
| 1557        | CakSNP1557     | <i>Kabuli</i>    | Ca_Kabuli_Chr01              | 19166597                       | (A/G)       |

| <b>S.N.</b> | <b>SNP IDs</b> | <b>Cultivars</b> | <b>Chromosomes/scaffolds</b> | <b>Physical positions (bp)</b> | <b>SNPs</b> |
|-------------|----------------|------------------|------------------------------|--------------------------------|-------------|
| 1558        | CakSNP1558     | <i>Kabuli</i>    | Ca_Kabuli_Chr01              | 19218067                       | (G/A)       |
| 1559        | CakSNP1559     | <i>Kabuli</i>    | Ca_Kabuli_Chr01              | 19218093                       | (T/G)       |
| 1560        | CakSNP1560     | <i>Kabuli</i>    | Ca_Kabuli_Chr01              | 19252952                       | (G/T)       |
| 1561        | CakSNP1561     | <i>Kabuli</i>    | Ca_Kabuli_Chr01              | 19252938                       | (G/A)       |
| 1562        | CakSNP1562     | <i>Kabuli</i>    | Ca_Kabuli_Chr01              | 19253655                       | (C/T)       |
| 1563        | CakSNP1563     | <i>Kabuli</i>    | Ca_Kabuli_Chr01              | 19254161                       | (G/A)       |
| 1564        | CakSNP1564     | <i>Kabuli</i>    | Ca_Kabuli_Chr01              | 19276489                       | (A/G)       |
| 1565        | CakSNP1565     | <i>Kabuli</i>    | Ca_Kabuli_Chr01              | 19276697                       | (C/G)       |
| 1566        | CakSNP1566     | <i>Kabuli</i>    | Ca_Kabuli_Chr01              | 19359812                       | (A/C)       |
| 1567        | CakSNP1567     | <i>Kabuli</i>    | Ca_Kabuli_Chr01              | 19359844                       | (C/A)       |
| 1568        | CakSNP1568     | <i>Kabuli</i>    | Ca_Kabuli_Chr01              | 19399112                       | (C/T)       |
| 1569        | CakSNP1569     | <i>Kabuli</i>    | Ca_Kabuli_Chr01              | 19526320                       | (T/C)       |
| 1570        | CakSNP1570     | <i>Kabuli</i>    | Ca_Kabuli_Chr01              | 19526531                       | (C/G)       |
| 1571        | CakSNP1571     | <i>Kabuli</i>    | Ca_Kabuli_Chr01              | 19526548                       | (G/A)       |
| 1572        | CakSNP1572     | <i>Kabuli</i>    | Ca_Kabuli_Chr01              | 19526561                       | (T/C)       |
| 1573        | CakSNP1573     | <i>Kabuli</i>    | Ca_Kabuli_Chr01              | 19526592                       | (T/A)       |
| 1574        | CakSNP1574     | <i>Kabuli</i>    | Ca_Kabuli_Chr01              | 19526652                       | (G/T)       |
| 1575        | CakSNP1575     | <i>Kabuli</i>    | Ca_Kabuli_Chr01              | 19526632                       | (C/T)       |
| 1576        | CakSNP1576     | <i>Kabuli</i>    | Ca_Kabuli_Chr01              | 19572408                       | (C/T)       |
| 1577        | CakSNP1577     | <i>Kabuli</i>    | Ca_Kabuli_Chr01              | 19572494                       | (G/C)       |
| 1578        | CakSNP1578     | <i>Kabuli</i>    | Ca_Kabuli_Chr01              | 19591671                       | (A/G)       |
| 1579        | CakSNP1579     | <i>Kabuli</i>    | Ca_Kabuli_Chr01              | 19877654                       | (A/T)       |
| 1580        | CakSNP1580     | <i>Kabuli</i>    | Ca_Kabuli_Chr01              | 19902735                       | (T/A)       |
| 1581        | CakSNP1581     | <i>Kabuli</i>    | Ca_Kabuli_Chr01              | 19903665                       | (A/G)       |
| 1582        | CakSNP1582     | <i>Kabuli</i>    | Ca_Kabuli_Chr01              | 19903683                       | (G/A)       |
| 1583        | CakSNP1583     | <i>Kabuli</i>    | Ca_Kabuli_Chr01              | 19903686                       | (T/A)       |
| 1584        | CakSNP1584     | <i>Kabuli</i>    | Ca_Kabuli_Chr01              | 19903690                       | (A/G)       |
| 1585        | CakSNP1585     | <i>Kabuli</i>    | Ca_Kabuli_Chr01              | 19903693                       | (G/T)       |
| 1586        | CakSNP1586     | <i>Kabuli</i>    | Ca_Kabuli_Chr01              | 19903701                       | (G/A)       |
| 1587        | CakSNP1587     | <i>Kabuli</i>    | Ca_Kabuli_Chr01              | 19903704                       | (G/A)       |
| 1588        | CakSNP1588     | <i>Kabuli</i>    | Ca_Kabuli_Chr01              | 20004655                       | (A/G)       |
| 1589        | CakSNP1589     | <i>Kabuli</i>    | Ca_Kabuli_Chr01              | 20005747                       | (C/T)       |
| 1590        | CakSNP1590     | <i>Kabuli</i>    | Ca_Kabuli_Chr01              | 20016525                       | (C/T)       |
| 1591        | CakSNP1591     | <i>Kabuli</i>    | Ca_Kabuli_Chr01              | 20070045                       | (A/G)       |
| 1592        | CakSNP1592     | <i>Kabuli</i>    | Ca_Kabuli_Chr01              | 20070197                       | (T/C)       |
| 1593        | CakSNP1593     | <i>Kabuli</i>    | Ca_Kabuli_Chr01              | 20091291                       | (T/G)       |
| 1594        | CakSNP1594     | <i>Kabuli</i>    | Ca_Kabuli_Chr01              | 20092571                       | (C/G)       |
| 1595        | CakSNP1595     | <i>Kabuli</i>    | Ca_Kabuli_Chr01              | 20092677                       | (C/A)       |

| <b>S.N.</b> | <b>SNP IDs</b> | <b>Cultivars</b> | <b>Chromosomes/scaffolds</b> | <b>Physical positions (bp)</b> | <b>SNPs</b> |
|-------------|----------------|------------------|------------------------------|--------------------------------|-------------|
| 1596        | CakSNP1596     | <i>Kabuli</i>    | Ca_Kabuli_Chr01              | 21822975                       | (A/G)       |
| 1597        | CakSNP1597     | <i>Kabuli</i>    | Ca_Kabuli_Chr01              | 21881133                       | (G/A)       |
| 1598        | CakSNP1598     | <i>Kabuli</i>    | Ca_Kabuli_Chr01              | 21881112                       | (C/T)       |
| 1599        | CakSNP1599     | <i>Kabuli</i>    | Ca_Kabuli_Chr01              | 21881103                       | (G/A)       |
| 1600        | CakSNP1600     | <i>Kabuli</i>    | Ca_Kabuli_Chr01              | 21881094                       | (G/A)       |
| 1601        | CakSNP1601     | <i>Kabuli</i>    | Ca_Kabuli_Chr01              | 21918747                       | (G/A)       |
| 1602        | CakSNP1602     | <i>Kabuli</i>    | Ca_Kabuli_Chr01              | 22344003                       | (G/A)       |
| 1603        | CakSNP1603     | <i>Kabuli</i>    | Ca_Kabuli_Chr01              | 22437033                       | (C/T)       |
| 1604        | CakSNP1604     | <i>Kabuli</i>    | Ca_Kabuli_Chr01              | 22465555                       | (C/T)       |
| 1605        | CakSNP1605     | <i>Kabuli</i>    | Ca_Kabuli_Chr01              | 22465692                       | (A/G)       |
| 1606        | CakSNP1606     | <i>Kabuli</i>    | Ca_Kabuli_Chr01              | 22719581                       | (T/G)       |
| 1607        | CakSNP1607     | <i>Kabuli</i>    | Ca_Kabuli_Chr01              | 22743361                       | (T/G)       |
| 1608        | CakSNP1608     | <i>Kabuli</i>    | Ca_Kabuli_Chr01              | 23122951                       | (A/G)       |
| 1609        | CakSNP1609     | <i>Kabuli</i>    | Ca_Kabuli_Chr01              | 23128921                       | (T/A)       |
| 1610        | CakSNP1610     | <i>Kabuli</i>    | Ca_Kabuli_Chr01              | 23128979                       | (G/T)       |
| 1611        | CakSNP1611     | <i>Kabuli</i>    | Ca_Kabuli_Chr01              | 23129094                       | (C/T)       |
| 1612        | CakSNP1612     | <i>Kabuli</i>    | Ca_Kabuli_Chr01              | 23131178                       | (A/C)       |
| 1613        | CakSNP1613     | <i>Kabuli</i>    | Ca_Kabuli_Chr01              | 23131914                       | (T/C)       |
| 1614        | CakSNP1614     | <i>Kabuli</i>    | Ca_Kabuli_Chr01              | 23148736                       | (A/C)       |
| 1615        | CakSNP1615     | <i>Kabuli</i>    | Ca_Kabuli_Chr01              | 23149053                       | (A/G)       |
| 1616        | CakSNP1616     | <i>Kabuli</i>    | Ca_Kabuli_Chr01              | 23149096                       | (A/C)       |
| 1617        | CakSNP1617     | <i>Kabuli</i>    | Ca_Kabuli_Chr01              | 23341499                       | (C/G)       |
| 1618        | CakSNP1618     | <i>Kabuli</i>    | Ca_Kabuli_Chr01              | 23382483                       | (T/A)       |
| 1619        | CakSNP1619     | <i>Kabuli</i>    | Ca_Kabuli_Chr01              | 23382454                       | (G/T)       |
| 1620        | CakSNP1620     | <i>Kabuli</i>    | Ca_Kabuli_Chr01              | 23382664                       | (C/T)       |
| 1621        | CakSNP1621     | <i>Kabuli</i>    | Ca_Kabuli_Chr01              | 23382645                       | (C/G)       |
| 1622        | CakSNP1622     | <i>Kabuli</i>    | Ca_Kabuli_Chr01              | 23915127                       | (C/G)       |
| 1623        | CakSNP1623     | <i>Kabuli</i>    | Ca_Kabuli_Chr01              | 23941438                       | (G/A)       |
| 1624        | CakSNP1624     | <i>Kabuli</i>    | Ca_Kabuli_Chr01              | 23941518                       | (C/T)       |
| 1625        | CakSNP1625     | <i>Kabuli</i>    | Ca_Kabuli_Chr01              | 24070908                       | (C/T)       |
| 1626        | CakSNP1626     | <i>Kabuli</i>    | Ca_Kabuli_Chr01              | 24070968                       | (C/T)       |
| 1627        | CakSNP1627     | <i>Kabuli</i>    | Ca_Kabuli_Chr01              | 24071007                       | (C/A)       |
| 1628        | CakSNP1628     | <i>Kabuli</i>    | Ca_Kabuli_Chr01              | 24071014                       | (T/G)       |
| 1629        | CakSNP1629     | <i>Kabuli</i>    | Ca_Kabuli_Chr01              | 24173273                       | (A/G)       |
| 1630        | CakSNP1630     | <i>Kabuli</i>    | Ca_Kabuli_Chr01              | 24450415                       | (T/C)       |
| 1631        | CakSNP1631     | <i>Kabuli</i>    | Ca_Kabuli_Chr01              | 24450511                       | (A/G)       |
| 1632        | CakSNP1632     | <i>Kabuli</i>    | Ca_Kabuli_Chr01              | 24450483                       | (T/G)       |
| 1633        | CakSNP1633     | <i>Kabuli</i>    | Ca_Kabuli_Chr01              | 24693506                       | (C/T)       |

| <b>S.N.</b> | <b>SNP IDs</b> | <b>Cultivars</b> | <b>Chromosomes/scaffolds</b> | <b>Physical positions (bp)</b> | <b>SNPs</b> |
|-------------|----------------|------------------|------------------------------|--------------------------------|-------------|
| 1634        | CakSNP1634     | <i>Kabuli</i>    | Ca_Kabuli_Chr01              | 24693602                       | (A/G)       |
| 1635        | CakSNP1635     | <i>Kabuli</i>    | Ca_Kabuli_Chr01              | 24693601                       | (C/T)       |
| 1636        | CakSNP1636     | <i>Kabuli</i>    | Ca_Kabuli_Chr01              | 24693586                       | (C/T)       |
| 1637        | CakSNP1637     | <i>Kabuli</i>    | Ca_Kabuli_Chr01              | 24693571                       | (G/A)       |
| 1638        | CakSNP1638     | <i>Kabuli</i>    | Ca_Kabuli_Chr01              | 24693550                       | (G/A)       |
| 1639        | CakSNP1639     | <i>Kabuli</i>    | Ca_Kabuli_Chr01              | 24693533                       | (G/A)       |
| 1640        | CakSNP1640     | <i>Kabuli</i>    | Ca_Kabuli_Chr01              | 24693521                       | (G/A)       |
| 1641        | CakSNP1641     | <i>Kabuli</i>    | Ca_Kabuli_Chr01              | 24828169                       | (C/T)       |
| 1642        | CakSNP1642     | <i>Kabuli</i>    | Ca_Kabuli_Chr01              | 24828245                       | (A/C)       |
| 1643        | CakSNP1643     | <i>Kabuli</i>    | Ca_Kabuli_Chr01              | 24845148                       | (A/C)       |
| 1644        | CakSNP1644     | <i>Kabuli</i>    | Ca_Kabuli_Chr01              | 24983908                       | (A/G)       |
| 1645        | CakSNP1645     | <i>Kabuli</i>    | Ca_Kabuli_Chr01              | 25039836                       | (T/C)       |
| 1646        | CakSNP1646     | <i>Kabuli</i>    | Ca_Kabuli_Chr01              | 25083482                       | (A/C)       |
| 1647        | CakSNP1647     | <i>Kabuli</i>    | Ca_Kabuli_Chr01              | 25083534                       | (A/C)       |
| 1648        | CakSNP1648     | <i>Kabuli</i>    | Ca_Kabuli_Chr01              | 25175124                       | (C/T)       |
| 1649        | CakSNP1649     | <i>Kabuli</i>    | Ca_Kabuli_Chr01              | 25176162                       | (C/A)       |
| 1650        | CakSNP1650     | <i>Kabuli</i>    | Ca_Kabuli_Chr01              | 25192363                       | (T/C)       |
| 1651        | CakSNP1651     | <i>Kabuli</i>    | Ca_Kabuli_Chr01              | 25524382                       | (C/T)       |
| 1652        | CakSNP1652     | <i>Kabuli</i>    | Ca_Kabuli_Chr01              | 25524425                       | (C/T)       |
| 1653        | CakSNP1653     | <i>Kabuli</i>    | Ca_Kabuli_Chr01              | 25524441                       | (T/C)       |
| 1654        | CakSNP1654     | <i>Kabuli</i>    | Ca_Kabuli_Chr01              | 25524459                       | (C/G)       |
| 1655        | CakSNP1655     | <i>Kabuli</i>    | Ca_Kabuli_Chr01              | 25524532                       | (T/C)       |
| 1656        | CakSNP1656     | <i>Kabuli</i>    | Ca_Kabuli_Chr01              | 25524519                       | (C/T)       |
| 1657        | CakSNP1657     | <i>Kabuli</i>    | Ca_Kabuli_Chr01              | 25524481                       | (T/A)       |
| 1658        | CakSNP1658     | <i>Kabuli</i>    | Ca_Kabuli_Chr01              | 25524480                       | (G/A)       |
| 1659        | CakSNP1659     | <i>Kabuli</i>    | Ca_Kabuli_Chr01              | 25524473                       | (C/T)       |
| 1660        | CakSNP1660     | <i>Kabuli</i>    | Ca_Kabuli_Chr01              | 25524465                       | (A/G)       |
| 1661        | CakSNP1661     | <i>Kabuli</i>    | Ca_Kabuli_Chr01              | 25524460                       | (G/A)       |
| 1662        | CakSNP1662     | <i>Kabuli</i>    | Ca_Kabuli_Chr01              | 25524458                       | (G/A)       |
| 1663        | CakSNP1663     | <i>Kabuli</i>    | Ca_Kabuli_Chr01              | 25524456                       | (C/T)       |
| 1664        | CakSNP1664     | <i>Kabuli</i>    | Ca_Kabuli_Chr01              | 25524455                       | (G/A)       |
| 1665        | CakSNP1665     | <i>Kabuli</i>    | Ca_Kabuli_Chr01              | 25524453                       | (C/T)       |
| 1666        | CakSNP1666     | <i>Kabuli</i>    | Ca_Kabuli_Chr01              | 25524451                       | (A/T)       |
| 1667        | CakSNP1667     | <i>Kabuli</i>    | Ca_Kabuli_Chr01              | 25524450                       | (C/T)       |
| 1668        | CakSNP1668     | <i>Kabuli</i>    | Ca_Kabuli_Chr01              | 25524464                       | (G/A)       |
| 1669        | CakSNP1669     | <i>Kabuli</i>    | Ca_Kabuli_Chr01              | 25524478                       | (C/A)       |
| 1670        | CakSNP1670     | <i>Kabuli</i>    | Ca_Kabuli_Chr01              | 25524488                       | (G/T)       |
| 1671        | CakSNP1671     | <i>Kabuli</i>    | Ca_Kabuli_Chr01              | 25524498                       | (G/C)       |

| <b>S.N.</b> | <b>SNP IDs</b> | <b>Cultivars</b> | <b>Chromosomes/scaffolds</b> | <b>Physical positions (bp)</b> | <b>SNPs</b> |
|-------------|----------------|------------------|------------------------------|--------------------------------|-------------|
| 1672        | CakSNP1672     | <i>Kabuli</i>    | Ca_Kabuli_Chr01              | 25524505                       | (A/G)       |
| 1673        | CakSNP1673     | <i>Kabuli</i>    | Ca_Kabuli_Chr01              | 25524520                       | (C/T)       |
| 1674        | CakSNP1674     | <i>Kabuli</i>    | Ca_Kabuli_Chr01              | 25524522                       | (G/A)       |
| 1675        | CakSNP1675     | <i>Kabuli</i>    | Ca_Kabuli_Chr01              | 25524524                       | (C/T)       |
| 1676        | CakSNP1676     | <i>Kabuli</i>    | Ca_Kabuli_Chr01              | 25732004                       | (T/C)       |
| 1677        | CakSNP1677     | <i>Kabuli</i>    | Ca_Kabuli_Chr01              | 25887539                       | (G/A)       |
| 1678        | CakSNP1678     | <i>Kabuli</i>    | Ca_Kabuli_Chr01              | 25987201                       | (A/C)       |
| 1679        | CakSNP1679     | <i>Kabuli</i>    | Ca_Kabuli_Chr01              | 26026817                       | (C/T)       |
| 1680        | CakSNP1680     | <i>Kabuli</i>    | Ca_Kabuli_Chr01              | 26190096                       | (G/A)       |
| 1681        | CakSNP1681     | <i>Kabuli</i>    | Ca_Kabuli_Chr01              | 26190050                       | (G/A)       |
| 1682        | CakSNP1682     | <i>Kabuli</i>    | Ca_Kabuli_Chr01              | 26481730                       | (C/T)       |
| 1683        | CakSNP1683     | <i>Kabuli</i>    | Ca_Kabuli_Chr01              | 26481747                       | (T/G)       |
| 1684        | CakSNP1684     | <i>Kabuli</i>    | Ca_Kabuli_Chr01              | 26484868                       | (G/C)       |
| 1685        | CakSNP1685     | <i>Kabuli</i>    | Ca_Kabuli_Chr01              | 26574098                       | (C/T)       |
| 1686        | CakSNP1686     | <i>Kabuli</i>    | Ca_Kabuli_Chr01              | 26574146                       | (C/T)       |
| 1687        | CakSNP1687     | <i>Kabuli</i>    | Ca_Kabuli_Chr01              | 26579621                       | (A/C)       |
| 1688        | CakSNP1688     | <i>Kabuli</i>    | Ca_Kabuli_Chr01              | 26746094                       | (A/T)       |
| 1689        | CakSNP1689     | <i>Kabuli</i>    | Ca_Kabuli_Chr01              | 26767522                       | (A/G)       |
| 1690        | CakSNP1690     | <i>Kabuli</i>    | Ca_Kabuli_Chr01              | 26767514                       | (A/G)       |
| 1691        | CakSNP1691     | <i>Kabuli</i>    | Ca_Kabuli_Chr01              | 26784404                       | (G/A)       |
| 1692        | CakSNP1692     | <i>Kabuli</i>    | Ca_Kabuli_Chr01              | 26784421                       | (G/T)       |
| 1693        | CakSNP1693     | <i>Kabuli</i>    | Ca_Kabuli_Chr01              | 26784422                       | (C/T)       |
| 1694        | CakSNP1694     | <i>Kabuli</i>    | Ca_Kabuli_Chr01              | 26784464                       | (C/T)       |
| 1695        | CakSNP1695     | <i>Kabuli</i>    | Ca_Kabuli_Chr01              | 26784548                       | (C/A)       |
| 1696        | CakSNP1696     | <i>Kabuli</i>    | Ca_Kabuli_Chr01              | 26784570                       | (A/G)       |
| 1697        | CakSNP1697     | <i>Kabuli</i>    | Ca_Kabuli_Chr01              | 26784592                       | (A/G)       |
| 1698        | CakSNP1698     | <i>Kabuli</i>    | Ca_Kabuli_Chr01              | 26784618                       | (G/A)       |
| 1699        | CakSNP1699     | <i>Kabuli</i>    | Ca_Kabuli_Chr01              | 26784732                       | (C/G)       |
| 1700        | CakSNP1700     | <i>Kabuli</i>    | Ca_Kabuli_Chr01              | 26785566                       | (T/G)       |
| 1701        | CakSNP1701     | <i>Kabuli</i>    | Ca_Kabuli_Chr01              | 26807401                       | (A/G)       |
| 1702        | CakSNP1702     | <i>Kabuli</i>    | Ca_Kabuli_Chr01              | 26807395                       | (T/G)       |
| 1703        | CakSNP1703     | <i>Kabuli</i>    | Ca_Kabuli_Chr01              | 26856541                       | (A/T)       |
| 1704        | CakSNP1704     | <i>Kabuli</i>    | Ca_Kabuli_Chr01              | 26856691                       | (G/A)       |
| 1705        | CakSNP1705     | <i>Kabuli</i>    | Ca_Kabuli_Chr01              | 26921471                       | (C/T)       |
| 1706        | CakSNP1706     | <i>Kabuli</i>    | Ca_Kabuli_Chr01              | 26921487                       | (C/A)       |
| 1707        | CakSNP1707     | <i>Kabuli</i>    | Ca_Kabuli_Chr01              | 26922011                       | (T/G)       |
| 1708        | CakSNP1708     | <i>Kabuli</i>    | Ca_Kabuli_Chr01              | 26922631                       | (C/T)       |
| 1709        | CakSNP1709     | <i>Kabuli</i>    | Ca_Kabuli_Chr01              | 26953535                       | (C/T)       |

| <b>S.N.</b> | <b>SNP IDs</b> | <b>Cultivars</b> | <b>Chromosomes/scaffolds</b> | <b>Physical positions (bp)</b> | <b>SNPs</b> |
|-------------|----------------|------------------|------------------------------|--------------------------------|-------------|
| 1710        | CakSNP1710     | <i>Kabuli</i>    | Ca_Kabuli_Chr01              | 27012495                       | (C/T)       |
| 1711        | CakSNP1711     | <i>Kabuli</i>    | Ca_Kabuli_Chr01              | 27012660                       | (G/C)       |
| 1712        | CakSNP1712     | <i>Kabuli</i>    | Ca_Kabuli_Chr01              | 27014895                       | (T/G)       |
| 1713        | CakSNP1713     | <i>Kabuli</i>    | Ca_Kabuli_Chr01              | 27014981                       | (A/G)       |
| 1714        | CakSNP1714     | <i>Kabuli</i>    | Ca_Kabuli_Chr01              | 27014951                       | (A/C)       |
| 1715        | CakSNP1715     | <i>Kabuli</i>    | Ca_Kabuli_Chr01              | 27016101                       | (G/A)       |
| 1716        | CakSNP1716     | <i>Kabuli</i>    | Ca_Kabuli_Chr01              | 27016206                       | (T/A)       |
| 1717        | CakSNP1717     | <i>Kabuli</i>    | Ca_Kabuli_Chr01              | 27017559                       | (G/A)       |
| 1718        | CakSNP1718     | <i>Kabuli</i>    | Ca_Kabuli_Chr01              | 27017560                       | (G/A)       |
| 1719        | CakSNP1719     | <i>Kabuli</i>    | Ca_Kabuli_Chr01              | 27017570                       | (A/G)       |
| 1720        | CakSNP1720     | <i>Kabuli</i>    | Ca_Kabuli_Chr01              | 27017604                       | (T/G)       |
| 1721        | CakSNP1721     | <i>Kabuli</i>    | Ca_Kabuli_Chr01              | 27017606                       | (C/T)       |
| 1722        | CakSNP1722     | <i>Kabuli</i>    | Ca_Kabuli_Chr01              | 27017617                       | (G/A)       |
| 1723        | CakSNP1723     | <i>Kabuli</i>    | Ca_Kabuli_Chr01              | 27017626                       | (A/C)       |
| 1724        | CakSNP1724     | <i>Kabuli</i>    | Ca_Kabuli_Chr01              | 27017628                       | (C/A)       |
| 1725        | CakSNP1725     | <i>Kabuli</i>    | Ca_Kabuli_Chr01              | 27017734                       | (T/C)       |
| 1726        | CakSNP1726     | <i>Kabuli</i>    | Ca_Kabuli_Chr01              | 27017765                       | (A/T)       |
| 1727        | CakSNP1727     | <i>Kabuli</i>    | Ca_Kabuli_Chr01              | 27017771                       | (G/A)       |
| 1728        | CakSNP1728     | <i>Kabuli</i>    | Ca_Kabuli_Chr01              | 27020193                       | (T/C)       |
| 1729        | CakSNP1729     | <i>Kabuli</i>    | Ca_Kabuli_Chr01              | 27020354                       | (C/A)       |
| 1730        | CakSNP1730     | <i>Kabuli</i>    | Ca_Kabuli_Chr01              | 28088501                       | (T/C)       |
| 1731        | CakSNP1731     | <i>Kabuli</i>    | Ca_Kabuli_Chr01              | 28106756                       | (G/A)       |
| 1732        | CakSNP1732     | <i>Kabuli</i>    | Ca_Kabuli_Chr01              | 28133847                       | (A/G)       |
| 1733        | CakSNP1733     | <i>Kabuli</i>    | Ca_Kabuli_Chr01              | 28133830                       | (A/T)       |
| 1734        | CakSNP1734     | <i>Kabuli</i>    | Ca_Kabuli_Chr01              | 28133814                       | (C/T)       |
| 1735        | CakSNP1735     | <i>Kabuli</i>    | Ca_Kabuli_Chr01              | 28143955                       | (G/A)       |
| 1736        | CakSNP1736     | <i>Kabuli</i>    | Ca_Kabuli_Chr01              | 28152260                       | (A/G)       |
| 1737        | CakSNP1737     | <i>Kabuli</i>    | Ca_Kabuli_Chr01              | 28656197                       | (C/A)       |
| 1738        | CakSNP1738     | <i>Kabuli</i>    | Ca_Kabuli_Chr01              | 28832810                       | (C/A)       |
| 1739        | CakSNP1739     | <i>Kabuli</i>    | Ca_Kabuli_Chr01              | 28907617                       | (G/A)       |
| 1740        | CakSNP1740     | <i>Kabuli</i>    | Ca_Kabuli_Chr01              | 28909059                       | (T/A)       |
| 1741        | CakSNP1741     | <i>Kabuli</i>    | Ca_Kabuli_Chr01              | 29020220                       | (T/G)       |
| 1742        | CakSNP1742     | <i>Kabuli</i>    | Ca_Kabuli_Chr01              | 29116430                       | (T/C)       |
| 1743        | CakSNP1743     | <i>Kabuli</i>    | Ca_Kabuli_Chr01              | 29460440                       | (C/A)       |
| 1744        | CakSNP1744     | <i>Kabuli</i>    | Ca_Kabuli_Chr01              | 29634320                       | (G/T)       |
| 1745        | CakSNP1745     | <i>Kabuli</i>    | Ca_Kabuli_Chr01              | 29637509                       | (A/C)       |
| 1746        | CakSNP1746     | <i>Kabuli</i>    | Ca_Kabuli_Chr01              | 29637526                       | (C/T)       |
| 1747        | CakSNP1747     | <i>Kabuli</i>    | Ca_Kabuli_Chr01              | 29637572                       | (T/G)       |



| <b>S.N.</b> | <b>SNP IDs</b> | <b>Cultivars</b> | <b>Chromosomes/scaffolds</b> | <b>Physical positions (bp)</b> | <b>SNPs</b> |
|-------------|----------------|------------------|------------------------------|--------------------------------|-------------|
| 1748        | CakSNP1748     | <i>Kabuli</i>    | Ca_Kabuli_Chr01              | 29637571                       | (T/G)       |
| 1749        | CakSNP1749     | <i>Kabuli</i>    | Ca_Kabuli_Chr01              | 30262124                       | (A/G)       |
| 1750        | CakSNP1750     | <i>Kabuli</i>    | Ca_Kabuli_Chr01              | 31080673                       | (T/G)       |
| 1751        | CakSNP1751     | <i>Kabuli</i>    | Ca_Kabuli_Chr01              | 31080792                       | (T/C)       |
| 1752        | CakSNP1752     | <i>Kabuli</i>    | Ca_Kabuli_Chr01              | 31240370                       | (A/G)       |
| 1753        | CakSNP1753     | <i>Kabuli</i>    | Ca_Kabuli_Chr01              | 31359861                       | (C/A)       |
| 1754        | CakSNP1754     | <i>Kabuli</i>    | Ca_Kabuli_Chr01              | 31369599                       | (T/C)       |
| 1755        | CakSNP1755     | <i>Kabuli</i>    | Ca_Kabuli_Chr01              | 31590263                       | (C/G)       |
| 1756        | CakSNP1756     | <i>Kabuli</i>    | Ca_Kabuli_Chr01              | 31590510                       | (G/A)       |
| 1757        | CakSNP1757     | <i>Kabuli</i>    | Ca_Kabuli_Chr01              | 31590548                       | (C/T)       |
| 1758        | CakSNP1758     | <i>Kabuli</i>    | Ca_Kabuli_Chr01              | 31838239                       | (G/A)       |
| 1759        | CakSNP1759     | <i>Kabuli</i>    | Ca_Kabuli_Chr01              | 32286538                       | (C/T)       |
| 1760        | CakSNP1760     | <i>Kabuli</i>    | Ca_Kabuli_Chr01              | 32286534                       | (G/C)       |
| 1761        | CakSNP1761     | <i>Kabuli</i>    | Ca_Kabuli_Chr01              | 32286518                       | (C/A)       |
| 1762        | CakSNP1762     | <i>Kabuli</i>    | Ca_Kabuli_Chr01              | 32286517                       | (G/A)       |
| 1763        | CakSNP1763     | <i>Kabuli</i>    | Ca_Kabuli_Chr01              | 32286469                       | (G/A)       |
| 1764        | CakSNP1764     | <i>Kabuli</i>    | Ca_Kabuli_Chr01              | 32286466                       | (A/G)       |
| 1765        | CakSNP1765     | <i>Kabuli</i>    | Ca_Kabuli_Chr01              | 32286568                       | (A/C)       |
| 1766        | CakSNP1766     | <i>Kabuli</i>    | Ca_Kabuli_Chr01              | 32286558                       | (A/G)       |
| 1767        | CakSNP1767     | <i>Kabuli</i>    | Ca_Kabuli_Chr01              | 32286550                       | (G/A)       |
| 1768        | CakSNP1768     | <i>Kabuli</i>    | Ca_Kabuli_Chr01              | 32286536                       | (G/A)       |
| 1769        | CakSNP1769     | <i>Kabuli</i>    | Ca_Kabuli_Chr01              | 32286551                       | (C/T)       |
| 1770        | CakSNP1770     | <i>Kabuli</i>    | Ca_Kabuli_Chr01              | 32286567                       | (C/T)       |
| 1771        | CakSNP1771     | <i>Kabuli</i>    | Ca_Kabuli_Chr01              | 32467929                       | (G/A)       |
| 1772        | CakSNP1772     | <i>Kabuli</i>    | Ca_Kabuli_Chr01              | 32467954                       | (A/C)       |
| 1773        | CakSNP1773     | <i>Kabuli</i>    | Ca_Kabuli_Chr01              | 32468053                       | (A/C)       |
| 1774        | CakSNP1774     | <i>Kabuli</i>    | Ca_Kabuli_Chr01              | 32468080                       | (A/T)       |
| 1775        | CakSNP1775     | <i>Kabuli</i>    | Ca_Kabuli_Chr01              | 32468105                       | (C/G)       |
| 1776        | CakSNP1776     | <i>Kabuli</i>    | Ca_Kabuli_Chr01              | 32468116                       | (A/G)       |
| 1777        | CakSNP1777     | <i>Kabuli</i>    | Ca_Kabuli_Chr01              | 32468119                       | (T/C)       |
| 1778        | CakSNP1778     | <i>Kabuli</i>    | Ca_Kabuli_Chr01              | 33058743                       | (T/C)       |
| 1779        | CakSNP1779     | <i>Kabuli</i>    | Ca_Kabuli_Chr01              | 33063207                       | (C/T)       |
| 1780        | CakSNP1780     | <i>Kabuli</i>    | Ca_Kabuli_Chr01              | 33194600                       | (T/C)       |
| 1781        | CakSNP1781     | <i>Kabuli</i>    | Ca_Kabuli_Chr01              | 33804152                       | (C/T)       |
| 1782        | CakSNP1782     | <i>Kabuli</i>    | Ca_Kabuli_Chr01              | 33804153                       | (C/T)       |
| 1783        | CakSNP1783     | <i>Kabuli</i>    | Ca_Kabuli_Chr01              | 33804189                       | (C/T)       |
| 1784        | CakSNP1784     | <i>Kabuli</i>    | Ca_Kabuli_Chr01              | 33804201                       | (C/T)       |
| 1785        | CakSNP1785     | <i>Kabuli</i>    | Ca_Kabuli_Chr01              | 33804232                       | (T/G)       |

| <b>S.N.</b> | <b>SNP IDs</b> | <b>Cultivars</b> | <b>Chromosomes/scaffolds</b> | <b>Physical positions (bp)</b> | <b>SNPs</b> |
|-------------|----------------|------------------|------------------------------|--------------------------------|-------------|
| 1786        | CakSNP1786     | <i>Kabuli</i>    | Ca_Kabuli_Chr01              | 33804247                       | (A/G)       |
| 1787        | CakSNP1787     | <i>Kabuli</i>    | Ca_Kabuli_Chr01              | 33804262                       | (C/G)       |
| 1788        | CakSNP1788     | <i>Kabuli</i>    | Ca_Kabuli_Chr01              | 34161921                       | (G/A)       |
| 1789        | CakSNP1789     | <i>Kabuli</i>    | Ca_Kabuli_Chr01              | 34261166                       | (C/A)       |
| 1790        | CakSNP1790     | <i>Kabuli</i>    | Ca_Kabuli_Chr01              | 34261158                       | (C/A)       |
| 1791        | CakSNP1791     | <i>Kabuli</i>    | Ca_Kabuli_Chr01              | 34311145                       | (T/G)       |
| 1792        | CakSNP1792     | <i>Kabuli</i>    | Ca_Kabuli_Chr01              | 34437114                       | (C/T)       |
| 1793        | CakSNP1793     | <i>Kabuli</i>    | Ca_Kabuli_Chr01              | 34727251                       | (T/G)       |
| 1794        | CakSNP1794     | <i>Kabuli</i>    | Ca_Kabuli_Chr01              | 34772813                       | (T/A)       |
| 1795        | CakSNP1795     | <i>Kabuli</i>    | Ca_Kabuli_Chr01              | 34866709                       | (C/A)       |
| 1796        | CakSNP1796     | <i>Kabuli</i>    | Ca_Kabuli_Chr01              | 34905580                       | (A/G)       |
| 1797        | CakSNP1797     | <i>Kabuli</i>    | Ca_Kabuli_Chr01              | 34911065                       | (T/A)       |
| 1798        | CakSNP1798     | <i>Kabuli</i>    | Ca_Kabuli_Chr01              | 34948934                       | (A/G)       |
| 1799        | CakSNP1799     | <i>Kabuli</i>    | Ca_Kabuli_Chr01              | 35041241                       | (T/G)       |
| 1800        | CakSNP1800     | <i>Kabuli</i>    | Ca_Kabuli_Chr01              | 35041324                       | (G/T)       |
| 1801        | CakSNP1801     | <i>Kabuli</i>    | Ca_Kabuli_Chr01              | 35313277                       | (A/G)       |
| 1802        | CakSNP1802     | <i>Kabuli</i>    | Ca_Kabuli_Chr01              | 35315381                       | (T/A)       |
| 1803        | CakSNP1803     | <i>Kabuli</i>    | Ca_Kabuli_Chr01              | 35315379                       | (A/T)       |
| 1804        | CakSNP1804     | <i>Kabuli</i>    | Ca_Kabuli_Chr01              | 35315347                       | (C/T)       |
| 1805        | CakSNP1805     | <i>Kabuli</i>    | Ca_Kabuli_Chr01              | 35315327                       | (T/A)       |
| 1806        | CakSNP1806     | <i>Kabuli</i>    | Ca_Kabuli_Chr01              | 35315436                       | (G/A)       |
| 1807        | CakSNP1807     | <i>Kabuli</i>    | Ca_Kabuli_Chr01              | 35708841                       | (C/T)       |
| 1808        | CakSNP1808     | <i>Kabuli</i>    | Ca_Kabuli_Chr01              | 36126090                       | (C/T)       |
| 1809        | CakSNP1809     | <i>Kabuli</i>    | Ca_Kabuli_Chr01              | 36794731                       | (A/G)       |
| 1810        | CakSNP1810     | <i>Kabuli</i>    | Ca_Kabuli_Chr01              | 36794797                       | (G/A)       |
| 1811        | CakSNP1811     | <i>Kabuli</i>    | Ca_Kabuli_Chr01              | 36794800                       | (G/T)       |
| 1812        | CakSNP1812     | <i>Kabuli</i>    | Ca_Kabuli_Chr01              | 36794806                       | (G/T)       |
| 1813        | CakSNP1813     | <i>Kabuli</i>    | Ca_Kabuli_Chr01              | 36794813                       | (C/T)       |
| 1814        | CakSNP1814     | <i>Kabuli</i>    | Ca_Kabuli_Chr01              | 36794887                       | (G/A)       |
| 1815        | CakSNP1815     | <i>Kabuli</i>    | Ca_Kabuli_Chr01              | 36794870                       | (C/T)       |
| 1816        | CakSNP1816     | <i>Kabuli</i>    | Ca_Kabuli_Chr01              | 36794900                       | (C/T)       |
| 1817        | CakSNP1817     | <i>Kabuli</i>    | Ca_Kabuli_Chr01              | 36794906                       | (A/C)       |
| 1818        | CakSNP1818     | <i>Kabuli</i>    | Ca_Kabuli_Chr01              | 36794912                       | (G/T)       |
| 1819        | CakSNP1819     | <i>Kabuli</i>    | Ca_Kabuli_Chr01              | 36794913                       | (A/T)       |
| 1820        | CakSNP1820     | <i>Kabuli</i>    | Ca_Kabuli_Chr01              | 36794915                       | (G/A)       |
| 1821        | CakSNP1821     | <i>Kabuli</i>    | Ca_Kabuli_Chr01              | 36892533                       | (C/T)       |
| 1822        | CakSNP1822     | <i>Kabuli</i>    | Ca_Kabuli_Chr01              | 37026302                       | (C/T)       |
| 1823        | CakSNP1823     | <i>Kabuli</i>    | Ca_Kabuli_Chr01              | 37608030                       | (G/A)       |

| <b>S.N.</b> | <b>SNP IDs</b> | <b>Cultivars</b> | <b>Chromosomes/scaffolds</b> | <b>Physical positions (bp)</b> | <b>SNPs</b> |
|-------------|----------------|------------------|------------------------------|--------------------------------|-------------|
| 1824        | CakSNP1824     | <i>Kabuli</i>    | Ca_Kabuli_Chr01              | 37608050                       | (T/G)       |
| 1825        | CakSNP1825     | <i>Kabuli</i>    | Ca_Kabuli_Chr01              | 37642546                       | (G/A)       |
| 1826        | CakSNP1826     | <i>Kabuli</i>    | Ca_Kabuli_Chr01              | 37643213                       | (T/C)       |
| 1827        | CakSNP1827     | <i>Kabuli</i>    | Ca_Kabuli_Chr01              | 37647602                       | (C/G)       |
| 1828        | CakSNP1828     | <i>Kabuli</i>    | Ca_Kabuli_Chr01              | 37651679                       | (G/A)       |
| 1829        | CakSNP1829     | <i>Kabuli</i>    | Ca_Kabuli_Chr01              | 37651695                       | (G/A)       |
| 1830        | CakSNP1830     | <i>Kabuli</i>    | Ca_Kabuli_Chr01              | 37651764                       | (A/C)       |
| 1831        | CakSNP1831     | <i>Kabuli</i>    | Ca_Kabuli_Chr01              | 37651711                       | (G/T)       |
| 1832        | CakSNP1832     | <i>Kabuli</i>    | Ca_Kabuli_Chr01              | 37651800                       | (T/A)       |
| 1833        | CakSNP1833     | <i>Kabuli</i>    | Ca_Kabuli_Chr01              | 37651823                       | (A/G)       |
| 1834        | CakSNP1834     | <i>Kabuli</i>    | Ca_Kabuli_Chr01              | 37651827                       | (C/T)       |
| 1835        | CakSNP1835     | <i>Kabuli</i>    | Ca_Kabuli_Chr01              | 37651843                       | (T/C)       |
| 1836        | CakSNP1836     | <i>Kabuli</i>    | Ca_Kabuli_Chr01              | 37654039                       | (C/G)       |
| 1837        | CakSNP1837     | <i>Kabuli</i>    | Ca_Kabuli_Chr01              | 37654136                       | (C/G)       |
| 1838        | CakSNP1838     | <i>Kabuli</i>    | Ca_Kabuli_Chr01              | 37654926                       | (C/T)       |
| 1839        | CakSNP1839     | <i>Kabuli</i>    | Ca_Kabuli_Chr01              | 37690416                       | (G/A)       |
| 1840        | CakSNP1840     | <i>Kabuli</i>    | Ca_Kabuli_Chr01              | 37690465                       | (T/C)       |
| 1841        | CakSNP1841     | <i>Kabuli</i>    | Ca_Kabuli_Chr01              | 37690498                       | (C/A)       |
| 1842        | CakSNP1842     | <i>Kabuli</i>    | Ca_Kabuli_Chr01              | 37690497                       | (A/T)       |
| 1843        | CakSNP1843     | <i>Kabuli</i>    | Ca_Kabuli_Chr01              | 37699039                       | (T/G)       |
| 1844        | CakSNP1844     | <i>Kabuli</i>    | Ca_Kabuli_Chr01              | 37699036                       | (T/C)       |
| 1845        | CakSNP1845     | <i>Kabuli</i>    | Ca_Kabuli_Chr01              | 37722095                       | (G/A)       |
| 1846        | CakSNP1846     | <i>Kabuli</i>    | Ca_Kabuli_Chr01              | 37722143                       | (G/C)       |
| 1847        | CakSNP1847     | <i>Kabuli</i>    | Ca_Kabuli_Chr01              | 37768179                       | (T/A)       |
| 1848        | CakSNP1848     | <i>Kabuli</i>    | Ca_Kabuli_Chr01              | 37768206                       | (A/T)       |
| 1849        | CakSNP1849     | <i>Kabuli</i>    | Ca_Kabuli_Chr01              | 37768238                       | (A/G)       |
| 1850        | CakSNP1850     | <i>Kabuli</i>    | Ca_Kabuli_Chr01              | 37768333                       | (C/T)       |
| 1851        | CakSNP1851     | <i>Kabuli</i>    | Ca_Kabuli_Chr01              | 37768299                       | (A/G)       |
| 1852        | CakSNP1852     | <i>Kabuli</i>    | Ca_Kabuli_Chr01              | 37768276                       | (G/C)       |
| 1853        | CakSNP1853     | <i>Kabuli</i>    | Ca_Kabuli_Chr01              | 37768264                       | (A/G)       |
| 1854        | CakSNP1854     | <i>Kabuli</i>    | Ca_Kabuli_Chr01              | 37862342                       | (T/G)       |
| 1855        | CakSNP1855     | <i>Kabuli</i>    | Ca_Kabuli_Chr01              | 37880995                       | (T/C)       |
| 1856        | CakSNP1856     | <i>Kabuli</i>    | Ca_Kabuli_Chr01              | 37892088                       | (A/C)       |
| 1857        | CakSNP1857     | <i>Kabuli</i>    | Ca_Kabuli_Chr01              | 37892089                       | (C/T)       |
| 1858        | CakSNP1858     | <i>Kabuli</i>    | Ca_Kabuli_Chr01              | 37892095                       | (A/G)       |
| 1859        | CakSNP1859     | <i>Kabuli</i>    | Ca_Kabuli_Chr01              | 37892139                       | (A/T)       |
| 1860        | CakSNP1860     | <i>Kabuli</i>    | Ca_Kabuli_Chr01              | 38049721                       | (C/T)       |
| 1861        | CakSNP1861     | <i>Kabuli</i>    | Ca_Kabuli_Chr01              | 38678712                       | (T/C)       |

| <b>S.N.</b> | <b>SNP IDs</b> | <b>Cultivars</b> | <b>Chromosomes/scaffolds</b> | <b>Physical positions (bp)</b> | <b>SNPs</b> |
|-------------|----------------|------------------|------------------------------|--------------------------------|-------------|
| 1862        | CakSNP1862     | <i>Kabuli</i>    | Ca_Kabuli_Chr01              | 38877670                       | (T/C)       |
| 1863        | CakSNP1863     | <i>Kabuli</i>    | Ca_Kabuli_Chr01              | 38877692                       | (G/T)       |
| 1864        | CakSNP1864     | <i>Kabuli</i>    | Ca_Kabuli_Chr01              | 39436291                       | (T/C)       |
| 1865        | CakSNP1865     | <i>Kabuli</i>    | Ca_Kabuli_Chr01              | 39601982                       | (T/G)       |
| 1866        | CakSNP1866     | <i>Kabuli</i>    | Ca_Kabuli_Chr01              | 39602029                       | (G/T)       |
| 1867        | CakSNP1867     | <i>Kabuli</i>    | Ca_Kabuli_Chr01              | 39616139                       | (A/C)       |
| 1868        | CakSNP1868     | <i>Kabuli</i>    | Ca_Kabuli_Chr01              | 39663432                       | (C/G)       |
| 1869        | CakSNP1869     | <i>Kabuli</i>    | Ca_Kabuli_Chr01              | 40224835                       | (T/A)       |
| 1870        | CakSNP1870     | <i>Kabuli</i>    | Ca_Kabuli_Chr01              | 40224834                       | (C/G)       |
| 1871        | CakSNP1871     | <i>Kabuli</i>    | Ca_Kabuli_Chr01              | 40224804                       | (A/G)       |
| 1872        | CakSNP1872     | <i>Kabuli</i>    | Ca_Kabuli_Chr01              | 40343216                       | (G/T)       |
| 1873        | CakSNP1873     | <i>Kabuli</i>    | Ca_Kabuli_Chr01              | 40346280                       | (A/C)       |
| 1874        | CakSNP1874     | <i>Kabuli</i>    | Ca_Kabuli_Chr01              | 40358693                       | (C/T)       |
| 1875        | CakSNP1875     | <i>Kabuli</i>    | Ca_Kabuli_Chr01              | 40358747                       | (T/G)       |
| 1876        | CakSNP1876     | <i>Kabuli</i>    | Ca_Kabuli_Chr01              | 40367940                       | (G/A)       |
| 1877        | CakSNP1877     | <i>Kabuli</i>    | Ca_Kabuli_Chr01              | 40368845                       | (C/T)       |
| 1878        | CakSNP1878     | <i>Kabuli</i>    | Ca_Kabuli_Chr01              | 40502077                       | (T/C)       |
| 1879        | CakSNP1879     | <i>Kabuli</i>    | Ca_Kabuli_Chr01              | 40570811                       | (G/T)       |
| 1880        | CakSNP1880     | <i>Kabuli</i>    | Ca_Kabuli_Chr01              | 40585026                       | (T/C)       |
| 1881        | CakSNP1881     | <i>Kabuli</i>    | Ca_Kabuli_Chr01              | 40630215                       | (C/T)       |
| 1882        | CakSNP1882     | <i>Kabuli</i>    | Ca_Kabuli_Chr01              | 40630213                       | (G/T)       |
| 1883        | CakSNP1883     | <i>Kabuli</i>    | Ca_Kabuli_Chr01              | 40630158                       | (T/A)       |
| 1884        | CakSNP1884     | <i>Kabuli</i>    | Ca_Kabuli_Chr01              | 40660069                       | (T/G)       |
| 1885        | CakSNP1885     | <i>Kabuli</i>    | Ca_Kabuli_Chr01              | 40660116                       | (G/A)       |
| 1886        | CakSNP1886     | <i>Kabuli</i>    | Ca_Kabuli_Chr01              | 40745421                       | (G/T)       |
| 1887        | CakSNP1887     | <i>Kabuli</i>    | Ca_Kabuli_Chr01              | 40745452                       | (T/C)       |
| 1888        | CakSNP1888     | <i>Kabuli</i>    | Ca_Kabuli_Chr01              | 40745492                       | (A/G)       |
| 1889        | CakSNP1889     | <i>Kabuli</i>    | Ca_Kabuli_Chr01              | 40745846                       | (T/C)       |
| 1890        | CakSNP1890     | <i>Kabuli</i>    | Ca_Kabuli_Chr01              | 41029732                       | (C/T)       |
| 1891        | CakSNP1891     | <i>Kabuli</i>    | Ca_Kabuli_Chr01              | 41065797                       | (G/C)       |
| 1892        | CakSNP1892     | <i>Kabuli</i>    | Ca_Kabuli_Chr01              | 41125493                       | (T/C)       |
| 1893        | CakSNP1893     | <i>Kabuli</i>    | Ca_Kabuli_Chr01              | 41169218                       | (G/T)       |
| 1894        | CakSNP1894     | <i>Kabuli</i>    | Ca_Kabuli_Chr01              | 41169430                       | (T/G)       |
| 1895        | CakSNP1895     | <i>Kabuli</i>    | Ca_Kabuli_Chr01              | 41169372                       | (T/A)       |
| 1896        | CakSNP1896     | <i>Kabuli</i>    | Ca_Kabuli_Chr01              | 41178168                       | (G/A)       |
| 1897        | CakSNP1897     | <i>Kabuli</i>    | Ca_Kabuli_Chr01              | 41178183                       | (C/A)       |
| 1898        | CakSNP1898     | <i>Kabuli</i>    | Ca_Kabuli_Chr01              | 41179660                       | (G/T)       |
| 1899        | CakSNP1899     | <i>Kabuli</i>    | Ca_Kabuli_Chr01              | 41179650                       | (A/T)       |

| <b>S.N.</b> | <b>SNP IDs</b> | <b>Cultivars</b> | <b>Chromosomes/scaffolds</b> | <b>Physical positions (bp)</b> | <b>SNPs</b> |
|-------------|----------------|------------------|------------------------------|--------------------------------|-------------|
| 1900        | CakSNP1900     | <i>Kabuli</i>    | Ca_Kabuli_Chr01              | 41185512                       | (T/G)       |
| 1901        | CakSNP1901     | <i>Kabuli</i>    | Ca_Kabuli_Chr01              | 41202173                       | (T/G)       |
| 1902        | CakSNP1902     | <i>Kabuli</i>    | Ca_Kabuli_Chr01              | 41202206                       | (A/G)       |
| 1903        | CakSNP1903     | <i>Kabuli</i>    | Ca_Kabuli_Chr01              | 41310401                       | (T/G)       |
| 1904        | CakSNP1904     | <i>Kabuli</i>    | Ca_Kabuli_Chr01              | 41339408                       | (T/A)       |
| 1905        | CakSNP1905     | <i>Kabuli</i>    | Ca_Kabuli_Chr01              | 41339445                       | (C/A)       |
| 1906        | CakSNP1906     | <i>Kabuli</i>    | Ca_Kabuli_Chr01              | 41380061                       | (G/T)       |
| 1907        | CakSNP1907     | <i>Kabuli</i>    | Ca_Kabuli_Chr01              | 41437222                       | (A/G)       |
| 1908        | CakSNP1908     | <i>Kabuli</i>    | Ca_Kabuli_Chr01              | 41437366                       | (T/C)       |
| 1909        | CakSNP1909     | <i>Kabuli</i>    | Ca_Kabuli_Chr01              | 41437453                       | (T/G)       |
| 1910        | CakSNP1910     | <i>Kabuli</i>    | Ca_Kabuli_Chr01              | 41437483                       | (G/A)       |
| 1911        | CakSNP1911     | <i>Kabuli</i>    | Ca_Kabuli_Chr01              | 41439539                       | (A/G)       |
| 1912        | CakSNP1912     | <i>Kabuli</i>    | Ca_Kabuli_Chr01              | 41439593                       | (A/G)       |
| 1913        | CakSNP1913     | <i>Kabuli</i>    | Ca_Kabuli_Chr01              | 41451910                       | (C/T)       |
| 1914        | CakSNP1914     | <i>Kabuli</i>    | Ca_Kabuli_Chr01              | 41451977                       | (C/T)       |
| 1915        | CakSNP1915     | <i>Kabuli</i>    | Ca_Kabuli_Chr01              | 41475442                       | (T/C)       |
| 1916        | CakSNP1916     | <i>Kabuli</i>    | Ca_Kabuli_Chr01              | 41484033                       | (T/C)       |
| 1917        | CakSNP1917     | <i>Kabuli</i>    | Ca_Kabuli_Chr01              | 41484085                       | (C/T)       |
| 1918        | CakSNP1918     | <i>Kabuli</i>    | Ca_Kabuli_Chr01              | 41564809                       | (T/C)       |
| 1919        | CakSNP1919     | <i>Kabuli</i>    | Ca_Kabuli_Chr01              | 41795343                       | (G/A)       |
| 1920        | CakSNP1920     | <i>Kabuli</i>    | Ca_Kabuli_Chr01              | 41795367                       | (C/T)       |
| 1921        | CakSNP1921     | <i>Kabuli</i>    | Ca_Kabuli_Chr01              | 41822419                       | (C/T)       |
| 1922        | CakSNP1922     | <i>Kabuli</i>    | Ca_Kabuli_Chr01              | 41827388                       | (T/C)       |
| 1923        | CakSNP1923     | <i>Kabuli</i>    | Ca_Kabuli_Chr01              | 41867035                       | (C/T)       |
| 1924        | CakSNP1924     | <i>Kabuli</i>    | Ca_Kabuli_Chr01              | 41897216                       | (C/A)       |
| 1925        | CakSNP1925     | <i>Kabuli</i>    | Ca_Kabuli_Chr01              | 41946005                       | (A/G)       |
| 1926        | CakSNP1926     | <i>Kabuli</i>    | Ca_Kabuli_Chr01              | 41981244                       | (G/A)       |
| 1927        | CakSNP1927     | <i>Kabuli</i>    | Ca_Kabuli_Chr01              | 41981259                       | (G/A)       |
| 1928        | CakSNP1928     | <i>Kabuli</i>    | Ca_Kabuli_Chr01              | 42189380                       | (A/G)       |
| 1929        | CakSNP1929     | <i>Kabuli</i>    | Ca_Kabuli_Chr01              | 42452801                       | (G/A)       |
| 1930        | CakSNP1930     | <i>Kabuli</i>    | Ca_Kabuli_Chr01              | 42452939                       | (G/T)       |
| 1931        | CakSNP1931     | <i>Kabuli</i>    | Ca_Kabuli_Chr01              | 42515406                       | (C/T)       |
| 1932        | CakSNP1932     | <i>Kabuli</i>    | Ca_Kabuli_Chr01              | 42551574                       | (T/G)       |
| 1933        | CakSNP1933     | <i>Kabuli</i>    | Ca_Kabuli_Chr01              | 42551585                       | (C/A)       |
| 1934        | CakSNP1934     | <i>Kabuli</i>    | Ca_Kabuli_Chr01              | 42552658                       | (A/C)       |
| 1935        | CakSNP1935     | <i>Kabuli</i>    | Ca_Kabuli_Chr01              | 42605239                       | (T/G)       |
| 1936        | CakSNP1936     | <i>Kabuli</i>    | Ca_Kabuli_Chr01              | 42610115                       | (A/C)       |
| 1937        | CakSNP1937     | <i>Kabuli</i>    | Ca_Kabuli_Chr01              | 42613060                       | (T/G)       |

| <b>S.N.</b> | <b>SNP IDs</b> | <b>Cultivars</b> | <b>Chromosomes/scaffolds</b> | <b>Physical positions (bp)</b> | <b>SNPs</b> |
|-------------|----------------|------------------|------------------------------|--------------------------------|-------------|
| 1938        | CakSNP1938     | <i>Kabuli</i>    | Ca_Kabuli_Chr01              | 42894518                       | (T/C)       |
| 1939        | CakSNP1939     | <i>Kabuli</i>    | Ca_Kabuli_Chr01              | 42894525                       | (T/C)       |
| 1940        | CakSNP1940     | <i>Kabuli</i>    | Ca_Kabuli_Chr01              | 42894536                       | (G/T)       |
| 1941        | CakSNP1941     | <i>Kabuli</i>    | Ca_Kabuli_Chr01              | 43053424                       | (G/C)       |
| 1942        | CakSNP1942     | <i>Kabuli</i>    | Ca_Kabuli_Chr01              | 43273910                       | (G/T)       |
| 1943        | CakSNP1943     | <i>Kabuli</i>    | Ca_Kabuli_Chr01              | 43273922                       | (T/C)       |
| 1944        | CakSNP1944     | <i>Kabuli</i>    | Ca_Kabuli_Chr01              | 43273925                       | (A/G)       |
| 1945        | CakSNP1945     | <i>Kabuli</i>    | Ca_Kabuli_Chr01              | 43273931                       | (G/A)       |
| 1946        | CakSNP1946     | <i>Kabuli</i>    | Ca_Kabuli_Chr01              | 43273941                       | (C/G)       |
| 1947        | CakSNP1947     | <i>Kabuli</i>    | Ca_Kabuli_Chr01              | 43273943                       | (A/G)       |
| 1948        | CakSNP1948     | <i>Kabuli</i>    | Ca_Kabuli_Chr01              | 43273961                       | (C/T)       |
| 1949        | CakSNP1949     | <i>Kabuli</i>    | Ca_Kabuli_Chr01              | 43273962                       | (A/G)       |
| 1950        | CakSNP1950     | <i>Kabuli</i>    | Ca_Kabuli_Chr01              | 43273968                       | (T/G)       |
| 1951        | CakSNP1951     | <i>Kabuli</i>    | Ca_Kabuli_Chr01              | 43273972                       | (C/T)       |
| 1952        | CakSNP1952     | <i>Kabuli</i>    | Ca_Kabuli_Chr01              | 43273981                       | (G/T)       |
| 1953        | CakSNP1953     | <i>Kabuli</i>    | Ca_Kabuli_Chr01              | 43273985                       | (G/A)       |
| 1954        | CakSNP1954     | <i>Kabuli</i>    | Ca_Kabuli_Chr01              | 43304584                       | (A/C)       |
| 1955        | CakSNP1955     | <i>Kabuli</i>    | Ca_Kabuli_Chr01              | 43304573                       | (C/T)       |
| 1956        | CakSNP1956     | <i>Kabuli</i>    | Ca_Kabuli_Chr01              | 43305858                       | (T/C)       |
| 1957        | CakSNP1957     | <i>Kabuli</i>    | Ca_Kabuli_Chr01              | 43305870                       | (G/A)       |
| 1958        | CakSNP1958     | <i>Kabuli</i>    | Ca_Kabuli_Chr01              | 43305886                       | (T/C)       |
| 1959        | CakSNP1959     | <i>Kabuli</i>    | Ca_Kabuli_Chr01              | 43305904                       | (C/A)       |
| 1960        | CakSNP1960     | <i>Kabuli</i>    | Ca_Kabuli_Chr01              | 43306048                       | (G/A)       |
| 1961        | CakSNP1961     | <i>Kabuli</i>    | Ca_Kabuli_Chr01              | 43306045                       | (C/A)       |
| 1962        | CakSNP1962     | <i>Kabuli</i>    | Ca_Kabuli_Chr01              | 43306036                       | (G/A)       |
| 1963        | CakSNP1963     | <i>Kabuli</i>    | Ca_Kabuli_Chr01              | 43306012                       | (G/A)       |
| 1964        | CakSNP1964     | <i>Kabuli</i>    | Ca_Kabuli_Chr01              | 43306221                       | (A/G)       |
| 1965        | CakSNP1965     | <i>Kabuli</i>    | Ca_Kabuli_Chr01              | 43509159                       | (A/G)       |
| 1966        | CakSNP1966     | <i>Kabuli</i>    | Ca_Kabuli_Chr01              | 43509409                       | (T/C)       |
| 1967        | CakSNP1967     | <i>Kabuli</i>    | Ca_Kabuli_Chr01              | 43576059                       | (A/G)       |
| 1968        | CakSNP1968     | <i>Kabuli</i>    | Ca_Kabuli_Chr01              | 43585657                       | (T/G)       |
| 1969        | CakSNP1969     | <i>Kabuli</i>    | Ca_Kabuli_Chr01              | 43590106                       | (C/T)       |
| 1970        | CakSNP1970     | <i>Kabuli</i>    | Ca_Kabuli_Chr01              | 43590258                       | (T/C)       |
| 1971        | CakSNP1971     | <i>Kabuli</i>    | Ca_Kabuli_Chr01              | 43724824                       | (C/T)       |
| 1972        | CakSNP1972     | <i>Kabuli</i>    | Ca_Kabuli_Chr01              | 43724839                       | (C/T)       |
| 1973        | CakSNP1973     | <i>Kabuli</i>    | Ca_Kabuli_Chr01              | 43724963                       | (C/T)       |
| 1974        | CakSNP1974     | <i>Kabuli</i>    | Ca_Kabuli_Chr01              | 43725059                       | (C/T)       |
| 1975        | CakSNP1975     | <i>Kabuli</i>    | Ca_Kabuli_Chr01              | 43725104                       | (T/C)       |

| <b>S.N.</b> | <b>SNP IDs</b> | <b>Cultivars</b> | <b>Chromosomes/scaffolds</b> | <b>Physical positions (bp)</b> | <b>SNPs</b> |
|-------------|----------------|------------------|------------------------------|--------------------------------|-------------|
| 1976        | CakSNP1976     | <i>Kabuli</i>    | Ca_Kabuli_Chr01              | 43727804                       | (C/T)       |
| 1977        | CakSNP1977     | <i>Kabuli</i>    | Ca_Kabuli_Chr01              | 43792565                       | (G/A)       |
| 1978        | CakSNP1978     | <i>Kabuli</i>    | Ca_Kabuli_Chr01              | 43800367                       | (C/T)       |
| 1979        | CakSNP1979     | <i>Kabuli</i>    | Ca_Kabuli_Chr01              | 43930143                       | (A/T)       |
| 1980        | CakSNP1980     | <i>Kabuli</i>    | Ca_Kabuli_Chr01              | 43930138                       | (T/C)       |
| 1981        | CakSNP1981     | <i>Kabuli</i>    | Ca_Kabuli_Chr01              | 43933881                       | (G/C)       |
| 1982        | CakSNP1982     | <i>Kabuli</i>    | Ca_Kabuli_Chr01              | 43933904                       | (A/G)       |
| 1983        | CakSNP1983     | <i>Kabuli</i>    | Ca_Kabuli_Chr01              | 43934024                       | (G/T)       |
| 1984        | CakSNP1984     | <i>Kabuli</i>    | Ca_Kabuli_Chr01              | 43934120                       | (A/G)       |
| 1985        | CakSNP1985     | <i>Kabuli</i>    | Ca_Kabuli_Chr01              | 43934117                       | (G/T)       |
| 1986        | CakSNP1986     | <i>Kabuli</i>    | Ca_Kabuli_Chr01              | 43934081                       | (C/T)       |
| 1987        | CakSNP1987     | <i>Kabuli</i>    | Ca_Kabuli_Chr01              | 43943035                       | (G/T)       |
| 1988        | CakSNP1988     | <i>Kabuli</i>    | Ca_Kabuli_Chr01              | 43954743                       | (C/G)       |
| 1989        | CakSNP1989     | <i>Kabuli</i>    | Ca_Kabuli_Chr01              | 44043281                       | (G/A)       |
| 1990        | CakSNP1990     | <i>Kabuli</i>    | Ca_Kabuli_Chr01              | 44085069                       | (C/T)       |
| 1991        | CakSNP1991     | <i>Kabuli</i>    | Ca_Kabuli_Chr01              | 44348947                       | (C/T)       |
| 1992        | CakSNP1992     | <i>Kabuli</i>    | Ca_Kabuli_Chr01              | 44349004                       | (T/C)       |
| 1993        | CakSNP1993     | <i>Kabuli</i>    | Ca_Kabuli_Chr01              | 44350953                       | (G/T)       |
| 1994        | CakSNP1994     | <i>Kabuli</i>    | Ca_Kabuli_Chr01              | 44635939                       | (T/C)       |
| 1995        | CakSNP1995     | <i>Kabuli</i>    | Ca_Kabuli_Chr01              | 44635926                       | (A/G)       |
| 1996        | CakSNP1996     | <i>Kabuli</i>    | Ca_Kabuli_Chr01              | 44635893                       | (A/G)       |
| 1997        | CakSNP1997     | <i>Kabuli</i>    | Ca_Kabuli_Chr01              | 44976738                       | (T/A)       |
| 1998        | CakSNP1998     | <i>Kabuli</i>    | Ca_Kabuli_Chr01              | 44976735                       | (C/T)       |
| 1999        | CakSNP1999     | <i>Kabuli</i>    | Ca_Kabuli_Chr01              | 44988344                       | (A/G)       |
| 2000        | CakSNP2000     | <i>Kabuli</i>    | Ca_Kabuli_Chr01              | 44988387                       | (C/A)       |
| 2001        | CakSNP2001     | <i>Kabuli</i>    | Ca_Kabuli_Chr01              | 45003190                       | (G/A)       |
| 2002        | CakSNP2002     | <i>Kabuli</i>    | Ca_Kabuli_Chr01              | 45003514                       | (G/A)       |
| 2003        | CakSNP2003     | <i>Kabuli</i>    | Ca_Kabuli_Chr01              | 45003509                       | (C/A)       |
| 2004        | CakSNP2004     | <i>Kabuli</i>    | Ca_Kabuli_Chr01              | 45003505                       | (A/C)       |
| 2005        | CakSNP2005     | <i>Kabuli</i>    | Ca_Kabuli_Chr01              | 45003938                       | (A/G)       |
| 2006        | CakSNP2006     | <i>Kabuli</i>    | Ca_Kabuli_Chr01              | 45003939                       | (T/A)       |
| 2007        | CakSNP2007     | <i>Kabuli</i>    | Ca_Kabuli_Chr01              | 45003940                       | (T/G)       |
| 2008        | CakSNP2008     | <i>Kabuli</i>    | Ca_Kabuli_Chr01              | 45003944                       | (C/T)       |
| 2009        | CakSNP2009     | <i>Kabuli</i>    | Ca_Kabuli_Chr01              | 45003945                       | (T/A)       |
| 2010        | CakSNP2010     | <i>Kabuli</i>    | Ca_Kabuli_Chr01              | 45003946                       | (T/G)       |
| 2011        | CakSNP2011     | <i>Kabuli</i>    | Ca_Kabuli_Chr01              | 45003947                       | (C/A)       |
| 2012        | CakSNP2012     | <i>Kabuli</i>    | Ca_Kabuli_Chr01              | 45003973                       | (T/C)       |
| 2013        | CakSNP2013     | <i>Kabuli</i>    | Ca_Kabuli_Chr01              | 45003985                       | (G/T)       |

| <b>S.N.</b> | <b>SNP IDs</b> | <b>Cultivars</b> | <b>Chromosomes/scaffolds</b> | <b>Physical positions (bp)</b> | <b>SNPs</b> |
|-------------|----------------|------------------|------------------------------|--------------------------------|-------------|
| 2014        | CakSNP2014     | <i>Kabuli</i>    | Ca_Kabuli_Chr01              | 45003998                       | (G/A)       |
| 2015        | CakSNP2015     | <i>Kabuli</i>    | Ca_Kabuli_Chr01              | 45004001                       | (C/T)       |
| 2016        | CakSNP2016     | <i>Kabuli</i>    | Ca_Kabuli_Chr01              | 45007032                       | (A/C)       |
| 2017        | CakSNP2017     | <i>Kabuli</i>    | Ca_Kabuli_Chr01              | 45007227                       | (T/C)       |
| 2018        | CakSNP2018     | <i>Kabuli</i>    | Ca_Kabuli_Chr01              | 45007259                       | (A/G)       |
| 2019        | CakSNP2019     | <i>Kabuli</i>    | Ca_Kabuli_Chr01              | 45007331                       | (C/T)       |
| 2020        | CakSNP2020     | <i>Kabuli</i>    | Ca_Kabuli_Chr01              | 45008076                       | (G/A)       |
| 2021        | CakSNP2021     | <i>Kabuli</i>    | Ca_Kabuli_Chr01              | 45008075                       | (T/C)       |
| 2022        | CakSNP2022     | <i>Kabuli</i>    | Ca_Kabuli_Chr01              | 45008073                       | (T/G)       |
| 2023        | CakSNP2023     | <i>Kabuli</i>    | Ca_Kabuli_Chr01              | 45008071                       | (G/C)       |
| 2024        | CakSNP2024     | <i>Kabuli</i>    | Ca_Kabuli_Chr01              | 45008050                       | (C/G)       |
| 2025        | CakSNP2025     | <i>Kabuli</i>    | Ca_Kabuli_Chr01              | 45008044                       | (T/C)       |
| 2026        | CakSNP2026     | <i>Kabuli</i>    | Ca_Kabuli_Chr01              | 45008041                       | (C/G)       |
| 2027        | CakSNP2027     | <i>Kabuli</i>    | Ca_Kabuli_Chr01              | 45008040                       | (G/C)       |
| 2028        | CakSNP2028     | <i>Kabuli</i>    | Ca_Kabuli_Chr01              | 45008039                       | (C/T)       |
| 2029        | CakSNP2029     | <i>Kabuli</i>    | Ca_Kabuli_Chr01              | 45008016                       | (T/A)       |
| 2030        | CakSNP2030     | <i>Kabuli</i>    | Ca_Kabuli_Chr01              | 45008015                       | (G/A)       |
| 2031        | CakSNP2031     | <i>Kabuli</i>    | Ca_Kabuli_Chr01              | 45008009                       | (C/T)       |
| 2032        | CakSNP2032     | <i>Kabuli</i>    | Ca_Kabuli_Chr01              | 45008006                       | (C/A)       |
| 2033        | CakSNP2033     | <i>Kabuli</i>    | Ca_Kabuli_Chr01              | 45008004                       | (C/T)       |
| 2034        | CakSNP2034     | <i>Kabuli</i>    | Ca_Kabuli_Chr01              | 45008074                       | (C/T)       |
| 2035        | CakSNP2035     | <i>Kabuli</i>    | Ca_Kabuli_Chr01              | 45250874                       | (G/A)       |
| 2036        | CakSNP2036     | <i>Kabuli</i>    | Ca_Kabuli_Chr01              | 45250872                       | (G/T)       |
| 2037        | CakSNP2037     | <i>Kabuli</i>    | Ca_Kabuli_Chr01              | 45250869                       | (G/A)       |
| 2038        | CakSNP2038     | <i>Kabuli</i>    | Ca_Kabuli_Chr01              | 45250863                       | (C/T)       |
| 2039        | CakSNP2039     | <i>Kabuli</i>    | Ca_Kabuli_Chr01              | 45250862                       | (A/T)       |
| 2040        | CakSNP2040     | <i>Kabuli</i>    | Ca_Kabuli_Chr01              | 45250834                       | (A/G)       |
| 2041        | CakSNP2041     | <i>Kabuli</i>    | Ca_Kabuli_Chr01              | 45250828                       | (G/C)       |
| 2042        | CakSNP2042     | <i>Kabuli</i>    | Ca_Kabuli_Chr01              | 45250807                       | (C/G)       |
| 2043        | CakSNP2043     | <i>Kabuli</i>    | Ca_Kabuli_Chr01              | 45250805                       | (A/C)       |
| 2044        | CakSNP2044     | <i>Kabuli</i>    | Ca_Kabuli_Chr01              | 45250803                       | (A/G)       |
| 2045        | CakSNP2045     | <i>Kabuli</i>    | Ca_Kabuli_Chr01              | 45250802                       | (C/T)       |
| 2046        | CakSNP2046     | <i>Kabuli</i>    | Ca_Kabuli_Chr01              | 46437023                       | (T/G)       |
| 2047        | CakSNP2047     | <i>Kabuli</i>    | Ca_Kabuli_Chr01              | 46523221                       | (C/T)       |
| 2048        | CakSNP2048     | <i>Kabuli</i>    | Ca_Kabuli_Chr01              | 46597131                       | (T/G)       |
| 2049        | CakSNP2049     | <i>Kabuli</i>    | Ca_Kabuli_Chr01              | 46745628                       | (C/A)       |
| 2050        | CakSNP2050     | <i>Kabuli</i>    | Ca_Kabuli_Chr01              | 46778814                       | (A/C)       |
| 2051        | CakSNP2051     | <i>Kabuli</i>    | Ca_Kabuli_Chr01              | 46791939                       | (T/G)       |



| <b>S.N.</b> | <b>SNP IDs</b> | <b>Cultivars</b> | <b>Chromosomes/scaffolds</b> | <b>Physical positions (bp)</b> | <b>SNPs</b> |
|-------------|----------------|------------------|------------------------------|--------------------------------|-------------|
| 2052        | CakSNP2052     | <i>Kabuli</i>    | Ca_Kabuli_Chr01              | 46793244                       | (G/A)       |
| 2053        | CakSNP2053     | <i>Kabuli</i>    | Ca_Kabuli_Chr01              | 46793357                       | (T/C)       |
| 2054        | CakSNP2054     | <i>Kabuli</i>    | Ca_Kabuli_Chr01              | 46793331                       | (C/G)       |
| 2055        | CakSNP2055     | <i>Kabuli</i>    | Ca_Kabuli_Chr01              | 46816041                       | (A/T)       |
| 2056        | CakSNP2056     | <i>Kabuli</i>    | Ca_Kabuli_Chr01              | 46825211                       | (G/A)       |
| 2057        | CakSNP2057     | <i>Kabuli</i>    | Ca_Kabuli_Chr01              | 46829662                       | (C/T)       |
| 2058        | CakSNP2058     | <i>Kabuli</i>    | Ca_Kabuli_Chr01              | 46832306                       | (T/G)       |
| 2059        | CakSNP2059     | <i>Kabuli</i>    | Ca_Kabuli_Chr01              | 46832395                       | (A/G)       |
| 2060        | CakSNP2060     | <i>Kabuli</i>    | Ca_Kabuli_Chr01              | 46832383                       | (T/C)       |
| 2061        | CakSNP2061     | <i>Kabuli</i>    | Ca_Kabuli_Chr01              | 46920524                       | (C/T)       |
| 2062        | CakSNP2062     | <i>Kabuli</i>    | Ca_Kabuli_Chr01              | 46920554                       | (T/C)       |
| 2063        | CakSNP2063     | <i>Kabuli</i>    | Ca_Kabuli_Chr01              | 46936196                       | (C/A)       |
| 2064        | CakSNP2064     | <i>Kabuli</i>    | Ca_Kabuli_Chr01              | 46936201                       | (C/T)       |
| 2065        | CakSNP2065     | <i>Kabuli</i>    | Ca_Kabuli_Chr01              | 46936207                       | (C/A)       |
| 2066        | CakSNP2066     | <i>Kabuli</i>    | Ca_Kabuli_Chr01              | 46936209                       | (C/T)       |
| 2067        | CakSNP2067     | <i>Kabuli</i>    | Ca_Kabuli_Chr01              | 46936329                       | (C/A)       |
| 2068        | CakSNP2068     | <i>Kabuli</i>    | Ca_Kabuli_Chr01              | 46936297                       | (A/G)       |
| 2069        | CakSNP2069     | <i>Kabuli</i>    | Ca_Kabuli_Chr01              | 46936428                       | (T/C)       |
| 2070        | CakSNP2070     | <i>Kabuli</i>    | Ca_Kabuli_Chr01              | 46936460                       | (A/C)       |
| 2071        | CakSNP2071     | <i>Kabuli</i>    | Ca_Kabuli_Chr01              | 46936456                       | (T/C)       |
| 2072        | CakSNP2072     | <i>Kabuli</i>    | Ca_Kabuli_Chr01              | 46936448                       | (A/C)       |
| 2073        | CakSNP2073     | <i>Kabuli</i>    | Ca_Kabuli_Chr01              | 46936447                       | (G/A)       |
| 2074        | CakSNP2074     | <i>Kabuli</i>    | Ca_Kabuli_Chr01              | 46941875                       | (T/C)       |
| 2075        | CakSNP2075     | <i>Kabuli</i>    | Ca_Kabuli_Chr01              | 46968740                       | (T/C)       |
| 2076        | CakSNP2076     | <i>Kabuli</i>    | Ca_Kabuli_Chr01              | 46969221                       | (T/A)       |
| 2077        | CakSNP2077     | <i>Kabuli</i>    | Ca_Kabuli_Chr01              | 46976508                       | (A/G)       |
| 2078        | CakSNP2078     | <i>Kabuli</i>    | Ca_Kabuli_Chr01              | 47042798                       | (T/A)       |
| 2079        | CakSNP2079     | <i>Kabuli</i>    | Ca_Kabuli_Chr01              | 47203123                       | (A/C)       |
| 2080        | CakSNP2080     | <i>Kabuli</i>    | Ca_Kabuli_Chr01              | 47263589                       | (C/T)       |
| 2081        | CakSNP2081     | <i>Kabuli</i>    | Ca_Kabuli_Chr01              | 47278505                       | (T/C)       |
| 2082        | CakSNP2082     | <i>Kabuli</i>    | Ca_Kabuli_Chr01              | 47331082                       | (T/C)       |
| 2083        | CakSNP2083     | <i>Kabuli</i>    | Ca_Kabuli_Chr01              | 47331080                       | (T/C)       |
| 2084        | CakSNP2084     | <i>Kabuli</i>    | Ca_Kabuli_Chr01              | 47423715                       | (A/T)       |
| 2085        | CakSNP2085     | <i>Kabuli</i>    | Ca_Kabuli_Chr01              | 47449818                       | (A/G)       |
| 2086        | CakSNP2086     | <i>Kabuli</i>    | Ca_Kabuli_Chr01              | 47449950                       | (T/C)       |
| 2087        | CakSNP2087     | <i>Kabuli</i>    | Ca_Kabuli_Chr01              | 47449891                       | (T/C)       |
| 2088        | CakSNP2088     | <i>Kabuli</i>    | Ca_Kabuli_Chr01              | 47449882                       | (A/C)       |
| 2089        | CakSNP2089     | <i>Kabuli</i>    | Ca_Kabuli_Chr01              | 47801491                       | (A/G)       |

| <b>S.N.</b> | <b>SNP IDs</b> | <b>Cultivars</b> | <b>Chromosomes/scaffolds</b> | <b>Physical positions (bp)</b> | <b>SNPs</b> |
|-------------|----------------|------------------|------------------------------|--------------------------------|-------------|
| 2090        | CakSNP2090     | <i>Kabuli</i>    | Ca_Kabuli_Chr01              | 47890026                       | (C/T)       |
| 2091        | CakSNP2091     | <i>Kabuli</i>    | Ca_Kabuli_Chr01              | 47897914                       | (C/T)       |
| 2092        | CakSNP2092     | <i>Kabuli</i>    | Ca_Kabuli_Chr01              | 47936748                       | (G/A)       |
| 2093        | CakSNP2093     | <i>Kabuli</i>    | Ca_Kabuli_Chr01              | 47936841                       | (A/G)       |
| 2094        | CakSNP2094     | <i>Kabuli</i>    | Ca_Kabuli_Chr01              | 47938884                       | (T/G)       |
| 2095        | CakSNP2095     | <i>Kabuli</i>    | Ca_Kabuli_Chr01              | 47947009                       | (T/C)       |
| 2096        | CakSNP2096     | <i>Kabuli</i>    | Ca_Kabuli_Chr01              | 47947281                       | (A/C)       |
| 2097        | CakSNP2097     | <i>Kabuli</i>    | Ca_Kabuli_Chr01              | 48026664                       | (G/T)       |
| 2098        | CakSNP2098     | <i>Kabuli</i>    | Ca_Kabuli_Chr01              | 48026701                       | (C/T)       |
| 2099        | CakSNP2099     | <i>Kabuli</i>    | Ca_Kabuli_Chr01              | 48026716                       | (T/G)       |
| 2100        | CakSNP2100     | <i>Kabuli</i>    | Ca_Kabuli_Chr01              | 48026727                       | (A/C)       |
| 2101        | CakSNP2101     | <i>Kabuli</i>    | Ca_Kabuli_Chr01              | 48027714                       | (C/A)       |
| 2102        | CakSNP2102     | <i>Kabuli</i>    | Ca_Kabuli_Chr01              | 48027869                       | (T/C)       |
| 2103        | CakSNP2103     | <i>Kabuli</i>    | Ca_Kabuli_Chr01              | 48028094                       | (G/A)       |
| 2104        | CakSNP2104     | <i>Kabuli</i>    | Ca_Kabuli_Chr01              | 48049293                       | (C/T)       |
| 2105        | CakSNP2105     | <i>Kabuli</i>    | Ca_Kabuli_Chr01              | 48132217                       | (G/A)       |
| 2106        | CakSNP2106     | <i>Kabuli</i>    | Ca_Kabuli_Chr01              | 48132521                       | (A/C)       |
| 2107        | CakSNP2107     | <i>Kabuli</i>    | Ca_Kabuli_Chr01              | 48154321                       | (A/C)       |
| 2108        | CakSNP2108     | <i>Kabuli</i>    | Ca_Kabuli_Chr01              | 48191460                       | (T/A)       |
| 2109        | CakSNP2109     | <i>Kabuli</i>    | Ca_Kabuli_Chr01              | 48195174                       | (T/A)       |
| 2110        | CakSNP2110     | <i>Kabuli</i>    | Ca_Kabuli_Chr01              | 48197895                       | (A/T)       |
| 2111        | CakSNP2111     | <i>Kabuli</i>    | Ca_Kabuli_Chr01              | 48197911                       | (T/G)       |
| 2112        | CakSNP2112     | <i>Kabuli</i>    | Ca_Kabuli_Chr01              | 48197979                       | (A/G)       |
| 2113        | CakSNP2113     | <i>Kabuli</i>    | Ca_Kabuli_Chr01              | 48197969                       | (G/A)       |
| 2114        | CakSNP2114     | <i>Kabuli</i>    | Ca_Kabuli_Chr01              | 48198932                       | (A/T)       |
| 2115        | CakSNP2115     | <i>Kabuli</i>    | Ca_Kabuli_Chr01              | 48265590                       | (T/G)       |
| 2116        | CakSNP2116     | <i>Kabuli</i>    | Ca_Kabuli_Chr01              | 48273097                       | (G/C)       |
| 2117        | CakSNP2117     | <i>Kabuli</i>    | Ca_Kabuli_Chr01              | 48273307                       | (C/T)       |
| 2118        | CakSNP2118     | <i>Kabuli</i>    | Ca_Kabuli_Chr02              | 113330                         | (C/T)       |
| 2119        | CakSNP2119     | <i>Kabuli</i>    | Ca_Kabuli_Chr02              | 149250                         | (C/A)       |
| 2120        | CakSNP2120     | <i>Kabuli</i>    | Ca_Kabuli_Chr02              | 149251                         | (A/T)       |
| 2121        | CakSNP2121     | <i>Kabuli</i>    | Ca_Kabuli_Chr02              | 149259                         | (A/C)       |
| 2122        | CakSNP2122     | <i>Kabuli</i>    | Ca_Kabuli_Chr02              | 149269                         | (C/T)       |
| 2123        | CakSNP2123     | <i>Kabuli</i>    | Ca_Kabuli_Chr02              | 149278                         | (G/T)       |
| 2124        | CakSNP2124     | <i>Kabuli</i>    | Ca_Kabuli_Chr02              | 149315                         | (C/A)       |
| 2125        | CakSNP2125     | <i>Kabuli</i>    | Ca_Kabuli_Chr02              | 149322                         | (C/A)       |
| 2126        | CakSNP2126     | <i>Kabuli</i>    | Ca_Kabuli_Chr02              | 149402                         | (C/T)       |
| 2127        | CakSNP2127     | <i>Kabuli</i>    | Ca_Kabuli_Chr02              | 149395                         | (T/C)       |

| <b>S.N.</b> | <b>SNP IDs</b> | <b>Cultivars</b> | <b>Chromosomes/scaffolds</b> | <b>Physical positions (bp)</b> | <b>SNPs</b> |
|-------------|----------------|------------------|------------------------------|--------------------------------|-------------|
| 2128        | CakSNP2128     | <i>Kabuli</i>    | Ca_Kabuli_Chr02              | 189287                         | (A/G)       |
| 2129        | CakSNP2129     | <i>Kabuli</i>    | Ca_Kabuli_Chr02              | 189784                         | (C/A)       |
| 2130        | CakSNP2130     | <i>Kabuli</i>    | Ca_Kabuli_Chr02              | 221903                         | (A/T)       |
| 2131        | CakSNP2131     | <i>Kabuli</i>    | Ca_Kabuli_Chr02              | 221955                         | (A/G)       |
| 2132        | CakSNP2132     | <i>Kabuli</i>    | Ca_Kabuli_Chr02              | 233589                         | (C/T)       |
| 2133        | CakSNP2133     | <i>Kabuli</i>    | Ca_Kabuli_Chr02              | 270139                         | (G/A)       |
| 2134        | CakSNP2134     | <i>Kabuli</i>    | Ca_Kabuli_Chr02              | 354795                         | (T/C)       |
| 2135        | CakSNP2135     | <i>Kabuli</i>    | Ca_Kabuli_Chr02              | 355905                         | (T/C)       |
| 2136        | CakSNP2136     | <i>Kabuli</i>    | Ca_Kabuli_Chr02              | 507857                         | (G/T)       |
| 2137        | CakSNP2137     | <i>Kabuli</i>    | Ca_Kabuli_Chr02              | 522943                         | (A/G)       |
| 2138        | CakSNP2138     | <i>Kabuli</i>    | Ca_Kabuli_Chr02              | 543360                         | (G/T)       |
| 2139        | CakSNP2139     | <i>Kabuli</i>    | Ca_Kabuli_Chr02              | 616251                         | (C/T)       |
| 2140        | CakSNP2140     | <i>Kabuli</i>    | Ca_Kabuli_Chr02              | 616410                         | (C/G)       |
| 2141        | CakSNP2141     | <i>Kabuli</i>    | Ca_Kabuli_Chr02              | 669304                         | (A/T)       |
| 2142        | CakSNP2142     | <i>Kabuli</i>    | Ca_Kabuli_Chr02              | 728957                         | (T/C)       |
| 2143        | CakSNP2143     | <i>Kabuli</i>    | Ca_Kabuli_Chr02              | 737183                         | (T/G)       |
| 2144        | CakSNP2144     | <i>Kabuli</i>    | Ca_Kabuli_Chr02              | 770164                         | (A/C)       |
| 2145        | CakSNP2145     | <i>Kabuli</i>    | Ca_Kabuli_Chr02              | 770183                         | (C/T)       |
| 2146        | CakSNP2146     | <i>Kabuli</i>    | Ca_Kabuli_Chr02              | 770234                         | (C/T)       |
| 2147        | CakSNP2147     | <i>Kabuli</i>    | Ca_Kabuli_Chr02              | 770237                         | (C/T)       |
| 2148        | CakSNP2148     | <i>Kabuli</i>    | Ca_Kabuli_Chr02              | 770225                         | (C/T)       |
| 2149        | CakSNP2149     | <i>Kabuli</i>    | Ca_Kabuli_Chr02              | 770260                         | (C/T)       |
| 2150        | CakSNP2150     | <i>Kabuli</i>    | Ca_Kabuli_Chr02              | 770266                         | (C/A)       |
| 2151        | CakSNP2151     | <i>Kabuli</i>    | Ca_Kabuli_Chr02              | 1231486                        | (A/G)       |
| 2152        | CakSNP2152     | <i>Kabuli</i>    | Ca_Kabuli_Chr02              | 1231500                        | (A/G)       |
| 2153        | CakSNP2153     | <i>Kabuli</i>    | Ca_Kabuli_Chr02              | 1231519                        | (T/C)       |
| 2154        | CakSNP2154     | <i>Kabuli</i>    | Ca_Kabuli_Chr02              | 1231618                        | (G/A)       |
| 2155        | CakSNP2155     | <i>Kabuli</i>    | Ca_Kabuli_Chr02              | 1234932                        | (C/T)       |
| 2156        | CakSNP2156     | <i>Kabuli</i>    | Ca_Kabuli_Chr02              | 1235018                        | (G/A)       |
| 2157        | CakSNP2157     | <i>Kabuli</i>    | Ca_Kabuli_Chr02              | 1234983                        | (T/C)       |
| 2158        | CakSNP2158     | <i>Kabuli</i>    | Ca_Kabuli_Chr02              | 1314367                        | (G/A)       |
| 2159        | CakSNP2159     | <i>Kabuli</i>    | Ca_Kabuli_Chr02              | 1368911                        | (A/G)       |
| 2160        | CakSNP2160     | <i>Kabuli</i>    | Ca_Kabuli_Chr02              | 1389661                        | (A/G)       |
| 2161        | CakSNP2161     | <i>Kabuli</i>    | Ca_Kabuli_Chr02              | 1397779                        | (C/T)       |
| 2162        | CakSNP2162     | <i>Kabuli</i>    | Ca_Kabuli_Chr02              | 1429186                        | (T/C)       |
| 2163        | CakSNP2163     | <i>Kabuli</i>    | Ca_Kabuli_Chr02              | 1429471                        | (G/C)       |
| 2164        | CakSNP2164     | <i>Kabuli</i>    | Ca_Kabuli_Chr02              | 1431368                        | (A/C)       |
| 2165        | CakSNP2165     | <i>Kabuli</i>    | Ca_Kabuli_Chr02              | 1493971                        | (A/G)       |

| <b>S.N.</b> | <b>SNP IDs</b> | <b>Cultivars</b> | <b>Chromosomes/scaffolds</b> | <b>Physical positions (bp)</b> | <b>SNPs</b> |
|-------------|----------------|------------------|------------------------------|--------------------------------|-------------|
| 2166        | CakSNP2166     | <i>Kabuli</i>    | Ca_Kabuli_Chr02              | 1610477                        | (G/T)       |
| 2167        | CakSNP2167     | <i>Kabuli</i>    | Ca_Kabuli_Chr02              | 1668116                        | (A/G)       |
| 2168        | CakSNP2168     | <i>Kabuli</i>    | Ca_Kabuli_Chr02              | 1713343                        | (T/C)       |
| 2169        | CakSNP2169     | <i>Kabuli</i>    | Ca_Kabuli_Chr02              | 1797399                        | (A/G)       |
| 2170        | CakSNP2170     | <i>Kabuli</i>    | Ca_Kabuli_Chr02              | 1801341                        | (C/T)       |
| 2171        | CakSNP2171     | <i>Kabuli</i>    | Ca_Kabuli_Chr02              | 1828318                        | (T/C)       |
| 2172        | CakSNP2172     | <i>Kabuli</i>    | Ca_Kabuli_Chr02              | 1828406                        | (G/A)       |
| 2173        | CakSNP2173     | <i>Kabuli</i>    | Ca_Kabuli_Chr02              | 1829772                        | (C/T)       |
| 2174        | CakSNP2174     | <i>Kabuli</i>    | Ca_Kabuli_Chr02              | 1835055                        | (G/A)       |
| 2175        | CakSNP2175     | <i>Kabuli</i>    | Ca_Kabuli_Chr02              | 1841290                        | (A/T)       |
| 2176        | CakSNP2176     | <i>Kabuli</i>    | Ca_Kabuli_Chr02              | 1841267                        | (C/T)       |
| 2177        | CakSNP2177     | <i>Kabuli</i>    | Ca_Kabuli_Chr02              | 1867041                        | (C/A)       |
| 2178        | CakSNP2178     | <i>Kabuli</i>    | Ca_Kabuli_Chr02              | 1882691                        | (C/T)       |
| 2179        | CakSNP2179     | <i>Kabuli</i>    | Ca_Kabuli_Chr02              | 1884583                        | (C/T)       |
| 2180        | CakSNP2180     | <i>Kabuli</i>    | Ca_Kabuli_Chr02              | 1884704                        | (A/G)       |
| 2181        | CakSNP2181     | <i>Kabuli</i>    | Ca_Kabuli_Chr02              | 1888657                        | (C/G)       |
| 2182        | CakSNP2182     | <i>Kabuli</i>    | Ca_Kabuli_Chr02              | 1953614                        | (T/C)       |
| 2183        | CakSNP2183     | <i>Kabuli</i>    | Ca_Kabuli_Chr02              | 1997914                        | (C/T)       |
| 2184        | CakSNP2184     | <i>Kabuli</i>    | Ca_Kabuli_Chr02              | 1998003                        | (C/T)       |
| 2185        | CakSNP2185     | <i>Kabuli</i>    | Ca_Kabuli_Chr02              | 2086763                        | (T/G)       |
| 2186        | CakSNP2186     | <i>Kabuli</i>    | Ca_Kabuli_Chr02              | 2220871                        | (C/T)       |
| 2187        | CakSNP2187     | <i>Kabuli</i>    | Ca_Kabuli_Chr02              | 2227118                        | (A/G)       |
| 2188        | CakSNP2188     | <i>Kabuli</i>    | Ca_Kabuli_Chr02              | 2227074                        | (T/C)       |
| 2189        | CakSNP2189     | <i>Kabuli</i>    | Ca_Kabuli_Chr02              | 2227465                        | (G/A)       |
| 2190        | CakSNP2190     | <i>Kabuli</i>    | Ca_Kabuli_Chr02              | 2230089                        | (G/A)       |
| 2191        | CakSNP2191     | <i>Kabuli</i>    | Ca_Kabuli_Chr02              | 2230056                        | (T/C)       |
| 2192        | CakSNP2192     | <i>Kabuli</i>    | Ca_Kabuli_Chr02              | 2230984                        | (T/G)       |
| 2193        | CakSNP2193     | <i>Kabuli</i>    | Ca_Kabuli_Chr02              | 2230980                        | (C/A)       |
| 2194        | CakSNP2194     | <i>Kabuli</i>    | Ca_Kabuli_Chr02              | 2230976                        | (T/G)       |
| 2195        | CakSNP2195     | <i>Kabuli</i>    | Ca_Kabuli_Chr02              | 2246678                        | (T/C)       |
| 2196        | CakSNP2196     | <i>Kabuli</i>    | Ca_Kabuli_Chr02              | 2311915                        | (C/A)       |
| 2197        | CakSNP2197     | <i>Kabuli</i>    | Ca_Kabuli_Chr02              | 2311917                        | (A/C)       |
| 2198        | CakSNP2198     | <i>Kabuli</i>    | Ca_Kabuli_Chr02              | 2312104                        | (C/T)       |
| 2199        | CakSNP2199     | <i>Kabuli</i>    | Ca_Kabuli_Chr02              | 2312037                        | (T/G)       |
| 2200        | CakSNP2200     | <i>Kabuli</i>    | Ca_Kabuli_Chr02              | 2344777                        | (G/A)       |
| 2201        | CakSNP2201     | <i>Kabuli</i>    | Ca_Kabuli_Chr02              | 2344778                        | (A/G)       |
| 2202        | CakSNP2202     | <i>Kabuli</i>    | Ca_Kabuli_Chr02              | 2344786                        | (G/A)       |
| 2203        | CakSNP2203     | <i>Kabuli</i>    | Ca_Kabuli_Chr02              | 2344835                        | (G/T)       |

| <b>S.N.</b> | <b>SNP IDs</b> | <b>Cultivars</b> | <b>Chromosomes/scaffolds</b> | <b>Physical positions (bp)</b> | <b>SNPs</b> |
|-------------|----------------|------------------|------------------------------|--------------------------------|-------------|
| 2204        | CakSNP2204     | <i>Kabuli</i>    | Ca_Kabuli_Chr02              | 2414265                        | (A/G)       |
| 2205        | CakSNP2205     | <i>Kabuli</i>    | Ca_Kabuli_Chr02              | 2416422                        | (C/T)       |
| 2206        | CakSNP2206     | <i>Kabuli</i>    | Ca_Kabuli_Chr02              | 2441571                        | (G/A)       |
| 2207        | CakSNP2207     | <i>Kabuli</i>    | Ca_Kabuli_Chr02              | 2602831                        | (A/C)       |
| 2208        | CakSNP2208     | <i>Kabuli</i>    | Ca_Kabuli_Chr02              | 2650375                        | (T/C)       |
| 2209        | CakSNP2209     | <i>Kabuli</i>    | Ca_Kabuli_Chr02              | 2650373                        | (A/T)       |
| 2210        | CakSNP2210     | <i>Kabuli</i>    | Ca_Kabuli_Chr02              | 2652189                        | (A/T)       |
| 2211        | CakSNP2211     | <i>Kabuli</i>    | Ca_Kabuli_Chr02              | 2682235                        | (T/C)       |
| 2212        | CakSNP2212     | <i>Kabuli</i>    | Ca_Kabuli_Chr02              | 2682293                        | (T/C)       |
| 2213        | CakSNP2213     | <i>Kabuli</i>    | Ca_Kabuli_Chr02              | 2682321                        | (G/A)       |
| 2214        | CakSNP2214     | <i>Kabuli</i>    | Ca_Kabuli_Chr02              | 2682375                        | (A/G)       |
| 2215        | CakSNP2215     | <i>Kabuli</i>    | Ca_Kabuli_Chr02              | 2682408                        | (G/A)       |
| 2216        | CakSNP2216     | <i>Kabuli</i>    | Ca_Kabuli_Chr02              | 2682471                        | (A/G)       |
| 2217        | CakSNP2217     | <i>Kabuli</i>    | Ca_Kabuli_Chr02              | 2685299                        | (T/C)       |
| 2218        | CakSNP2218     | <i>Kabuli</i>    | Ca_Kabuli_Chr02              | 2697688                        | (G/C)       |
| 2219        | CakSNP2219     | <i>Kabuli</i>    | Ca_Kabuli_Chr02              | 2708805                        | (G/C)       |
| 2220        | CakSNP2220     | <i>Kabuli</i>    | Ca_Kabuli_Chr02              | 2780283                        | (C/T)       |
| 2221        | CakSNP2221     | <i>Kabuli</i>    | Ca_Kabuli_Chr02              | 2783727                        | (G/A)       |
| 2222        | CakSNP2222     | <i>Kabuli</i>    | Ca_Kabuli_Chr02              | 2846667                        | (T/C)       |
| 2223        | CakSNP2223     | <i>Kabuli</i>    | Ca_Kabuli_Chr02              | 2846774                        | (C/A)       |
| 2224        | CakSNP2224     | <i>Kabuli</i>    | Ca_Kabuli_Chr02              | 2965867                        | (G/A)       |
| 2225        | CakSNP2225     | <i>Kabuli</i>    | Ca_Kabuli_Chr02              | 3099959                        | (C/A)       |
| 2226        | CakSNP2226     | <i>Kabuli</i>    | Ca_Kabuli_Chr02              | 3099997                        | (A/T)       |
| 2227        | CakSNP2227     | <i>Kabuli</i>    | Ca_Kabuli_Chr02              | 3100116                        | (A/G)       |
| 2228        | CakSNP2228     | <i>Kabuli</i>    | Ca_Kabuli_Chr02              | 3113560                        | (G/A)       |
| 2229        | CakSNP2229     | <i>Kabuli</i>    | Ca_Kabuli_Chr02              | 3141128                        | (A/C)       |
| 2230        | CakSNP2230     | <i>Kabuli</i>    | Ca_Kabuli_Chr02              | 3164404                        | (A/G)       |
| 2231        | CakSNP2231     | <i>Kabuli</i>    | Ca_Kabuli_Chr02              | 3164355                        | (G/A)       |
| 2232        | CakSNP2232     | <i>Kabuli</i>    | Ca_Kabuli_Chr02              | 3366023                        | (C/T)       |
| 2233        | CakSNP2233     | <i>Kabuli</i>    | Ca_Kabuli_Chr02              | 3410375                        | (C/T)       |
| 2234        | CakSNP2234     | <i>Kabuli</i>    | Ca_Kabuli_Chr02              | 3450904                        | (C/A)       |
| 2235        | CakSNP2235     | <i>Kabuli</i>    | Ca_Kabuli_Chr02              | 3503763                        | (T/G)       |
| 2236        | CakSNP2236     | <i>Kabuli</i>    | Ca_Kabuli_Chr02              | 3503759                        | (T/A)       |
| 2237        | CakSNP2237     | <i>Kabuli</i>    | Ca_Kabuli_Chr02              | 3503753                        | (C/G)       |
| 2238        | CakSNP2238     | <i>Kabuli</i>    | Ca_Kabuli_Chr02              | 3503750                        | (C/G)       |
| 2239        | CakSNP2239     | <i>Kabuli</i>    | Ca_Kabuli_Chr02              | 3789808                        | (G/T)       |
| 2240        | CakSNP2240     | <i>Kabuli</i>    | Ca_Kabuli_Chr02              | 3843814                        | (C/T)       |
| 2241        | CakSNP2241     | <i>Kabuli</i>    | Ca_Kabuli_Chr02              | 3843826                        | (T/C)       |

| <b>S.N.</b> | <b>SNP IDs</b> | <b>Cultivars</b> | <b>Chromosomes/scaffolds</b> | <b>Physical positions (bp)</b> | <b>SNPs</b> |
|-------------|----------------|------------------|------------------------------|--------------------------------|-------------|
| 2242        | CakSNP2242     | <i>Kabuli</i>    | Ca_Kabuli_Chr02              | 3843836                        | (G/A)       |
| 2243        | CakSNP2243     | <i>Kabuli</i>    | Ca_Kabuli_Chr02              | 3852203                        | (C/A)       |
| 2244        | CakSNP2244     | <i>Kabuli</i>    | Ca_Kabuli_Chr02              | 3894041                        | (G/T)       |
| 2245        | CakSNP2245     | <i>Kabuli</i>    | Ca_Kabuli_Chr02              | 3904757                        | (G/A)       |
| 2246        | CakSNP2246     | <i>Kabuli</i>    | Ca_Kabuli_Chr02              | 3904761                        | (A/G)       |
| 2247        | CakSNP2247     | <i>Kabuli</i>    | Ca_Kabuli_Chr02              | 3908928                        | (A/G)       |
| 2248        | CakSNP2248     | <i>Kabuli</i>    | Ca_Kabuli_Chr02              | 3908955                        | (G/A)       |
| 2249        | CakSNP2249     | <i>Kabuli</i>    | Ca_Kabuli_Chr02              | 3909068                        | (G/A)       |
| 2250        | CakSNP2250     | <i>Kabuli</i>    | Ca_Kabuli_Chr02              | 3909062                        | (C/T)       |
| 2251        | CakSNP2251     | <i>Kabuli</i>    | Ca_Kabuli_Chr02              | 3915549                        | (A/G)       |
| 2252        | CakSNP2252     | <i>Kabuli</i>    | Ca_Kabuli_Chr02              | 3930211                        | (A/G)       |
| 2253        | CakSNP2253     | <i>Kabuli</i>    | Ca_Kabuli_Chr02              | 3930182                        | (A/G)       |
| 2254        | CakSNP2254     | <i>Kabuli</i>    | Ca_Kabuli_Chr02              | 3941397                        | (A/T)       |
| 2255        | CakSNP2255     | <i>Kabuli</i>    | Ca_Kabuli_Chr02              | 3994150                        | (A/C)       |
| 2256        | CakSNP2256     | <i>Kabuli</i>    | Ca_Kabuli_Chr02              | 3998491                        | (A/C)       |
| 2257        | CakSNP2257     | <i>Kabuli</i>    | Ca_Kabuli_Chr02              | 3999615                        | (C/T)       |
| 2258        | CakSNP2258     | <i>Kabuli</i>    | Ca_Kabuli_Chr02              | 4039745                        | (T/C)       |
| 2259        | CakSNP2259     | <i>Kabuli</i>    | Ca_Kabuli_Chr02              | 4039854                        | (G/A)       |
| 2260        | CakSNP2260     | <i>Kabuli</i>    | Ca_Kabuli_Chr02              | 4325658                        | (A/C)       |
| 2261        | CakSNP2261     | <i>Kabuli</i>    | Ca_Kabuli_Chr02              | 4325684                        | (C/A)       |
| 2262        | CakSNP2262     | <i>Kabuli</i>    | Ca_Kabuli_Chr02              | 4404813                        | (C/T)       |
| 2263        | CakSNP2263     | <i>Kabuli</i>    | Ca_Kabuli_Chr02              | 4404797                        | (G/A)       |
| 2264        | CakSNP2264     | <i>Kabuli</i>    | Ca_Kabuli_Chr02              | 4966216                        | (C/T)       |
| 2265        | CakSNP2265     | <i>Kabuli</i>    | Ca_Kabuli_Chr02              | 4966168                        | (G/C)       |
| 2266        | CakSNP2266     | <i>Kabuli</i>    | Ca_Kabuli_Chr02              | 4981626                        | (A/G)       |
| 2267        | CakSNP2267     | <i>Kabuli</i>    | Ca_Kabuli_Chr02              | 4981698                        | (C/T)       |
| 2268        | CakSNP2268     | <i>Kabuli</i>    | Ca_Kabuli_Chr02              | 4981686                        | (T/C)       |
| 2269        | CakSNP2269     | <i>Kabuli</i>    | Ca_Kabuli_Chr02              | 4981666                        | (G/C)       |
| 2270        | CakSNP2270     | <i>Kabuli</i>    | Ca_Kabuli_Chr02              | 5017291                        | (T/A)       |
| 2271        | CakSNP2271     | <i>Kabuli</i>    | Ca_Kabuli_Chr02              | 5017330                        | (G/C)       |
| 2272        | CakSNP2272     | <i>Kabuli</i>    | Ca_Kabuli_Chr02              | 5078323                        | (T/C)       |
| 2273        | CakSNP2273     | <i>Kabuli</i>    | Ca_Kabuli_Chr02              | 5079639                        | (C/T)       |
| 2274        | CakSNP2274     | <i>Kabuli</i>    | Ca_Kabuli_Chr02              | 5085761                        | (A/C)       |
| 2275        | CakSNP2275     | <i>Kabuli</i>    | Ca_Kabuli_Chr02              | 5085836                        | (G/C)       |
| 2276        | CakSNP2276     | <i>Kabuli</i>    | Ca_Kabuli_Chr02              | 5100017                        | (T/A)       |
| 2277        | CakSNP2277     | <i>Kabuli</i>    | Ca_Kabuli_Chr02              | 5099985                        | (A/G)       |
| 2278        | CakSNP2278     | <i>Kabuli</i>    | Ca_Kabuli_Chr02              | 5118370                        | (A/T)       |
| 2279        | CakSNP2279     | <i>Kabuli</i>    | Ca_Kabuli_Chr02              | 5118364                        | (C/T)       |

| <b>S.N.</b> | <b>SNP IDs</b> | <b>Cultivars</b> | <b>Chromosomes/scaffolds</b> | <b>Physical positions (bp)</b> | <b>SNPs</b> |
|-------------|----------------|------------------|------------------------------|--------------------------------|-------------|
| 2280        | CakSNP2280     | <i>Kabuli</i>    | Ca_Kabuli_Chr02              | 5141075                        | (C/T)       |
| 2281        | CakSNP2281     | <i>Kabuli</i>    | Ca_Kabuli_Chr02              | 5141081                        | (A/T)       |
| 2282        | CakSNP2282     | <i>Kabuli</i>    | Ca_Kabuli_Chr02              | 5247305                        | (T/C)       |
| 2283        | CakSNP2283     | <i>Kabuli</i>    | Ca_Kabuli_Chr02              | 5247548                        | (G/T)       |
| 2284        | CakSNP2284     | <i>Kabuli</i>    | Ca_Kabuli_Chr02              | 5247547                        | (A/G)       |
| 2285        | CakSNP2285     | <i>Kabuli</i>    | Ca_Kabuli_Chr02              | 5247540                        | (T/C)       |
| 2286        | CakSNP2286     | <i>Kabuli</i>    | Ca_Kabuli_Chr02              | 5247481                        | (T/A)       |
| 2287        | CakSNP2287     | <i>Kabuli</i>    | Ca_Kabuli_Chr02              | 5247557                        | (A/C)       |
| 2288        | CakSNP2288     | <i>Kabuli</i>    | Ca_Kabuli_Chr02              | 5247558                        | (G/T)       |
| 2289        | CakSNP2289     | <i>Kabuli</i>    | Ca_Kabuli_Chr02              | 5259254                        | (T/C)       |
| 2290        | CakSNP2290     | <i>Kabuli</i>    | Ca_Kabuli_Chr02              | 5276208                        | (T/C)       |
| 2291        | CakSNP2291     | <i>Kabuli</i>    | Ca_Kabuli_Chr02              | 5342864                        | (C/A)       |
| 2292        | CakSNP2292     | <i>Kabuli</i>    | Ca_Kabuli_Chr02              | 5342923                        | (A/G)       |
| 2293        | CakSNP2293     | <i>Kabuli</i>    | Ca_Kabuli_Chr02              | 5359177                        | (C/A)       |
| 2294        | CakSNP2294     | <i>Kabuli</i>    | Ca_Kabuli_Chr02              | 5449886                        | (C/T)       |
| 2295        | CakSNP2295     | <i>Kabuli</i>    | Ca_Kabuli_Chr02              | 5449978                        | (T/C)       |
| 2296        | CakSNP2296     | <i>Kabuli</i>    | Ca_Kabuli_Chr02              | 5449907                        | (G/A)       |
| 2297        | CakSNP2297     | <i>Kabuli</i>    | Ca_Kabuli_Chr02              | 5462902                        | (A/T)       |
| 2298        | CakSNP2298     | <i>Kabuli</i>    | Ca_Kabuli_Chr02              | 5468575                        | (A/T)       |
| 2299        | CakSNP2299     | <i>Kabuli</i>    | Ca_Kabuli_Chr02              | 5475329                        | (C/A)       |
| 2300        | CakSNP2300     | <i>Kabuli</i>    | Ca_Kabuli_Chr02              | 5475344                        | (A/G)       |
| 2301        | CakSNP2301     | <i>Kabuli</i>    | Ca_Kabuli_Chr02              | 5475365                        | (T/C)       |
| 2302        | CakSNP2302     | <i>Kabuli</i>    | Ca_Kabuli_Chr02              | 5475407                        | (C/T)       |
| 2303        | CakSNP2303     | <i>Kabuli</i>    | Ca_Kabuli_Chr02              | 5504300                        | (T/G)       |
| 2304        | CakSNP2304     | <i>Kabuli</i>    | Ca_Kabuli_Chr02              | 5601092                        | (G/C)       |
| 2305        | CakSNP2305     | <i>Kabuli</i>    | Ca_Kabuli_Chr02              | 5787862                        | (G/A)       |
| 2306        | CakSNP2306     | <i>Kabuli</i>    | Ca_Kabuli_Chr02              | 5787887                        | (A/C)       |
| 2307        | CakSNP2307     | <i>Kabuli</i>    | Ca_Kabuli_Chr02              | 5877688                        | (A/G)       |
| 2308        | CakSNP2308     | <i>Kabuli</i>    | Ca_Kabuli_Chr02              | 5881503                        | (A/G)       |
| 2309        | CakSNP2309     | <i>Kabuli</i>    | Ca_Kabuli_Chr02              | 5897314                        | (T/C)       |
| 2310        | CakSNP2310     | <i>Kabuli</i>    | Ca_Kabuli_Chr02              | 5904368                        | (T/C)       |
| 2311        | CakSNP2311     | <i>Kabuli</i>    | Ca_Kabuli_Chr02              | 5936796                        | (C/A)       |
| 2312        | CakSNP2312     | <i>Kabuli</i>    | Ca_Kabuli_Chr02              | 5936902                        | (A/T)       |
| 2313        | CakSNP2313     | <i>Kabuli</i>    | Ca_Kabuli_Chr02              | 6042131                        | (G/A)       |
| 2314        | CakSNP2314     | <i>Kabuli</i>    | Ca_Kabuli_Chr02              | 6042139                        | (C/A)       |
| 2315        | CakSNP2315     | <i>Kabuli</i>    | Ca_Kabuli_Chr02              | 6042210                        | (C/A)       |
| 2316        | CakSNP2316     | <i>Kabuli</i>    | Ca_Kabuli_Chr02              | 6060259                        | (G/C)       |
| 2317        | CakSNP2317     | <i>Kabuli</i>    | Ca_Kabuli_Chr02              | 6130301                        | (G/C)       |

| <b>S.N.</b> | <b>SNP IDs</b> | <b>Cultivars</b> | <b>Chromosomes/scaffolds</b> | <b>Physical positions (bp)</b> | <b>SNPs</b> |
|-------------|----------------|------------------|------------------------------|--------------------------------|-------------|
| 2318        | CakSNP2318     | <i>Kabuli</i>    | Ca_Kabuli_Chr02              | 6130257                        | (C/A)       |
| 2319        | CakSNP2319     | <i>Kabuli</i>    | Ca_Kabuli_Chr02              | 6130247                        | (G/C)       |
| 2320        | CakSNP2320     | <i>Kabuli</i>    | Ca_Kabuli_Chr02              | 6162378                        | (T/G)       |
| 2321        | CakSNP2321     | <i>Kabuli</i>    | Ca_Kabuli_Chr02              | 6162406                        | (G/C)       |
| 2322        | CakSNP2322     | <i>Kabuli</i>    | Ca_Kabuli_Chr02              | 6213582                        | (T/A)       |
| 2323        | CakSNP2323     | <i>Kabuli</i>    | Ca_Kabuli_Chr02              | 6213580                        | (C/A)       |
| 2324        | CakSNP2324     | <i>Kabuli</i>    | Ca_Kabuli_Chr02              | 6213566                        | (C/T)       |
| 2325        | CakSNP2325     | <i>Kabuli</i>    | Ca_Kabuli_Chr02              | 6213530                        | (C/A)       |
| 2326        | CakSNP2326     | <i>Kabuli</i>    | Ca_Kabuli_Chr02              | 6213520                        | (G/T)       |
| 2327        | CakSNP2327     | <i>Kabuli</i>    | Ca_Kabuli_Chr02              | 6349208                        | (T/G)       |
| 2328        | CakSNP2328     | <i>Kabuli</i>    | Ca_Kabuli_Chr02              | 6367649                        | (A/G)       |
| 2329        | CakSNP2329     | <i>Kabuli</i>    | Ca_Kabuli_Chr02              | 6367704                        | (A/G)       |
| 2330        | CakSNP2330     | <i>Kabuli</i>    | Ca_Kabuli_Chr02              | 6391819                        | (T/C)       |
| 2331        | CakSNP2331     | <i>Kabuli</i>    | Ca_Kabuli_Chr02              | 6392158                        | (A/T)       |
| 2332        | CakSNP2332     | <i>Kabuli</i>    | Ca_Kabuli_Chr02              | 6392209                        | (G/A)       |
| 2333        | CakSNP2333     | <i>Kabuli</i>    | Ca_Kabuli_Chr02              | 6392272                        | (T/C)       |
| 2334        | CakSNP2334     | <i>Kabuli</i>    | Ca_Kabuli_Chr02              | 6392254                        | (T/C)       |
| 2335        | CakSNP2335     | <i>Kabuli</i>    | Ca_Kabuli_Chr02              | 6392449                        | (A/G)       |
| 2336        | CakSNP2336     | <i>Kabuli</i>    | Ca_Kabuli_Chr02              | 6397551                        | (A/G)       |
| 2337        | CakSNP2337     | <i>Kabuli</i>    | Ca_Kabuli_Chr02              | 6397597                        | (A/C)       |
| 2338        | CakSNP2338     | <i>Kabuli</i>    | Ca_Kabuli_Chr02              | 6408406                        | (C/A)       |
| 2339        | CakSNP2339     | <i>Kabuli</i>    | Ca_Kabuli_Chr02              | 6534776                        | (C/A)       |
| 2340        | CakSNP2340     | <i>Kabuli</i>    | Ca_Kabuli_Chr02              | 6537296                        | (G/T)       |
| 2341        | CakSNP2341     | <i>Kabuli</i>    | Ca_Kabuli_Chr02              | 6537300                        | (G/T)       |
| 2342        | CakSNP2342     | <i>Kabuli</i>    | Ca_Kabuli_Chr02              | 6727932                        | (G/C)       |
| 2343        | CakSNP2343     | <i>Kabuli</i>    | Ca_Kabuli_Chr02              | 6727905                        | (G/C)       |
| 2344        | CakSNP2344     | <i>Kabuli</i>    | Ca_Kabuli_Chr02              | 6727900                        | (G/C)       |
| 2345        | CakSNP2345     | <i>Kabuli</i>    | Ca_Kabuli_Chr02              | 6728716                        | (A/T)       |
| 2346        | CakSNP2346     | <i>Kabuli</i>    | Ca_Kabuli_Chr02              | 6728719                        | (C/T)       |
| 2347        | CakSNP2347     | <i>Kabuli</i>    | Ca_Kabuli_Chr02              | 6728763                        | (T/C)       |
| 2348        | CakSNP2348     | <i>Kabuli</i>    | Ca_Kabuli_Chr02              | 6989950                        | (A/G)       |
| 2349        | CakSNP2349     | <i>Kabuli</i>    | Ca_Kabuli_Chr02              | 6990083                        | (G/A)       |
| 2350        | CakSNP2350     | <i>Kabuli</i>    | Ca_Kabuli_Chr02              | 7007701                        | (G/C)       |
| 2351        | CakSNP2351     | <i>Kabuli</i>    | Ca_Kabuli_Chr02              | 7027093                        | (G/A)       |
| 2352        | CakSNP2352     | <i>Kabuli</i>    | Ca_Kabuli_Chr02              | 7027146                        | (T/C)       |
| 2353        | CakSNP2353     | <i>Kabuli</i>    | Ca_Kabuli_Chr02              | 7047195                        | (C/A)       |
| 2354        | CakSNP2354     | <i>Kabuli</i>    | Ca_Kabuli_Chr02              | 7047196                        | (T/C)       |
| 2355        | CakSNP2355     | <i>Kabuli</i>    | Ca_Kabuli_Chr02              | 7047197                        | (G/C)       |



| <b>S.N.</b> | <b>SNP IDs</b> | <b>Cultivars</b> | <b>Chromosomes/scaffolds</b> | <b>Physical positions (bp)</b> | <b>SNPs</b> |
|-------------|----------------|------------------|------------------------------|--------------------------------|-------------|
| 2356        | CakSNP2356     | <i>Kabuli</i>    | Ca_Kabuli_Chr02              | 7051451                        | (G/A)       |
| 2357        | CakSNP2357     | <i>Kabuli</i>    | Ca_Kabuli_Chr02              | 7125992                        | (T/G)       |
| 2358        | CakSNP2358     | <i>Kabuli</i>    | Ca_Kabuli_Chr02              | 7126018                        | (T/G)       |
| 2359        | CakSNP2359     | <i>Kabuli</i>    | Ca_Kabuli_Chr02              | 7507259                        | (C/A)       |
| 2360        | CakSNP2360     | <i>Kabuli</i>    | Ca_Kabuli_Chr02              | 7633520                        | (G/A)       |
| 2361        | CakSNP2361     | <i>Kabuli</i>    | Ca_Kabuli_Chr02              | 7633547                        | (C/T)       |
| 2362        | CakSNP2362     | <i>Kabuli</i>    | Ca_Kabuli_Chr02              | 7633564                        | (G/T)       |
| 2363        | CakSNP2363     | <i>Kabuli</i>    | Ca_Kabuli_Chr02              | 7633572                        | (T/C)       |
| 2364        | CakSNP2364     | <i>Kabuli</i>    | Ca_Kabuli_Chr02              | 7633605                        | (T/A)       |
| 2365        | CakSNP2365     | <i>Kabuli</i>    | Ca_Kabuli_Chr02              | 7633592                        | (G/A)       |
| 2366        | CakSNP2366     | <i>Kabuli</i>    | Ca_Kabuli_Chr02              | 7633585                        | (G/A)       |
| 2367        | CakSNP2367     | <i>Kabuli</i>    | Ca_Kabuli_Chr02              | 7633869                        | (G/A)       |
| 2368        | CakSNP2368     | <i>Kabuli</i>    | Ca_Kabuli_Chr02              | 7633826                        | (G/A)       |
| 2369        | CakSNP2369     | <i>Kabuli</i>    | Ca_Kabuli_Chr02              | 7633818                        | (G/A)       |
| 2370        | CakSNP2370     | <i>Kabuli</i>    | Ca_Kabuli_Chr02              | 7633816                        | (G/A)       |
| 2371        | CakSNP2371     | <i>Kabuli</i>    | Ca_Kabuli_Chr02              | 7633813                        | (G/T)       |
| 2372        | CakSNP2372     | <i>Kabuli</i>    | Ca_Kabuli_Chr02              | 7633793                        | (C/T)       |
| 2373        | CakSNP2373     | <i>Kabuli</i>    | Ca_Kabuli_Chr02              | 7634041                        | (G/A)       |
| 2374        | CakSNP2374     | <i>Kabuli</i>    | Ca_Kabuli_Chr02              | 7679627                        | (A/T)       |
| 2375        | CakSNP2375     | <i>Kabuli</i>    | Ca_Kabuli_Chr02              | 7679693                        | (C/G)       |
| 2376        | CakSNP2376     | <i>Kabuli</i>    | Ca_Kabuli_Chr02              | 7701189                        | (T/G)       |
| 2377        | CakSNP2377     | <i>Kabuli</i>    | Ca_Kabuli_Chr02              | 7701199                        | (T/G)       |
| 2378        | CakSNP2378     | <i>Kabuli</i>    | Ca_Kabuli_Chr02              | 7701216                        | (T/G)       |
| 2379        | CakSNP2379     | <i>Kabuli</i>    | Ca_Kabuli_Chr02              | 7701230                        | (T/G)       |
| 2380        | CakSNP2380     | <i>Kabuli</i>    | Ca_Kabuli_Chr02              | 7702468                        | (A/T)       |
| 2381        | CakSNP2381     | <i>Kabuli</i>    | Ca_Kabuli_Chr02              | 7708668                        | (C/T)       |
| 2382        | CakSNP2382     | <i>Kabuli</i>    | Ca_Kabuli_Chr02              | 7708663                        | (T/C)       |
| 2383        | CakSNP2383     | <i>Kabuli</i>    | Ca_Kabuli_Chr02              | 7708660                        | (G/A)       |
| 2384        | CakSNP2384     | <i>Kabuli</i>    | Ca_Kabuli_Chr02              | 7708630                        | (C/A)       |
| 2385        | CakSNP2385     | <i>Kabuli</i>    | Ca_Kabuli_Chr02              | 7708617                        | (G/T)       |
| 2386        | CakSNP2386     | <i>Kabuli</i>    | Ca_Kabuli_Chr02              | 7708603                        | (C/T)       |
| 2387        | CakSNP2387     | <i>Kabuli</i>    | Ca_Kabuli_Chr02              | 7708598                        | (C/T)       |
| 2388        | CakSNP2388     | <i>Kabuli</i>    | Ca_Kabuli_Chr02              | 7708596                        | (T/C)       |
| 2389        | CakSNP2389     | <i>Kabuli</i>    | Ca_Kabuli_Chr02              | 7708590                        | (A/T)       |
| 2390        | CakSNP2390     | <i>Kabuli</i>    | Ca_Kabuli_Chr02              | 7708678                        | (C/T)       |
| 2391        | CakSNP2391     | <i>Kabuli</i>    | Ca_Kabuli_Chr02              | 7712181                        | (C/T)       |
| 2392        | CakSNP2392     | <i>Kabuli</i>    | Ca_Kabuli_Chr02              | 7712155                        | (G/T)       |
| 2393        | CakSNP2393     | <i>Kabuli</i>    | Ca_Kabuli_Chr02              | 7714392                        | (G/A)       |

| <b>S.N.</b> | <b>SNP IDs</b> | <b>Cultivars</b> | <b>Chromosomes/scaffolds</b> | <b>Physical positions (bp)</b> | <b>SNPs</b> |
|-------------|----------------|------------------|------------------------------|--------------------------------|-------------|
| 2394        | CakSNP2394     | <i>Kabuli</i>    | Ca_Kabuli_Chr02              | 7714454                        | (A/G)       |
| 2395        | CakSNP2395     | <i>Kabuli</i>    | Ca_Kabuli_Chr02              | 7714463                        | (T/C)       |
| 2396        | CakSNP2396     | <i>Kabuli</i>    | Ca_Kabuli_Chr02              | 7753419                        | (G/C)       |
| 2397        | CakSNP2397     | <i>Kabuli</i>    | Ca_Kabuli_Chr02              | 7753425                        | (T/C)       |
| 2398        | CakSNP2398     | <i>Kabuli</i>    | Ca_Kabuli_Chr02              | 7753440                        | (C/T)       |
| 2399        | CakSNP2399     | <i>Kabuli</i>    | Ca_Kabuli_Chr02              | 7819281                        | (T/C)       |
| 2400        | CakSNP2400     | <i>Kabuli</i>    | Ca_Kabuli_Chr02              | 7870919                        | (G/T)       |
| 2401        | CakSNP2401     | <i>Kabuli</i>    | Ca_Kabuli_Chr02              | 7870943                        | (T/G)       |
| 2402        | CakSNP2402     | <i>Kabuli</i>    | Ca_Kabuli_Chr02              | 7938890                        | (T/C)       |
| 2403        | CakSNP2403     | <i>Kabuli</i>    | Ca_Kabuli_Chr02              | 8337517                        | (C/T)       |
| 2404        | CakSNP2404     | <i>Kabuli</i>    | Ca_Kabuli_Chr02              | 8484840                        | (A/T)       |
| 2405        | CakSNP2405     | <i>Kabuli</i>    | Ca_Kabuli_Chr02              | 8487331                        | (T/A)       |
| 2406        | CakSNP2406     | <i>Kabuli</i>    | Ca_Kabuli_Chr02              | 8487343                        | (C/T)       |
| 2407        | CakSNP2407     | <i>Kabuli</i>    | Ca_Kabuli_Chr02              | 8489241                        | (C/A)       |
| 2408        | CakSNP2408     | <i>Kabuli</i>    | Ca_Kabuli_Chr02              | 8489237                        | (G/A)       |
| 2409        | CakSNP2409     | <i>Kabuli</i>    | Ca_Kabuli_Chr02              | 8489172                        | (C/A)       |
| 2410        | CakSNP2410     | <i>Kabuli</i>    | Ca_Kabuli_Chr02              | 8600256                        | (C/G)       |
| 2411        | CakSNP2411     | <i>Kabuli</i>    | Ca_Kabuli_Chr02              | 8600298                        | (A/G)       |
| 2412        | CakSNP2412     | <i>Kabuli</i>    | Ca_Kabuli_Chr02              | 8600309                        | (T/C)       |
| 2413        | CakSNP2413     | <i>Kabuli</i>    | Ca_Kabuli_Chr02              | 8600450                        | (C/T)       |
| 2414        | CakSNP2414     | <i>Kabuli</i>    | Ca_Kabuli_Chr02              | 8600666                        | (T/C)       |
| 2415        | CakSNP2415     | <i>Kabuli</i>    | Ca_Kabuli_Chr02              | 8685674                        | (G/A)       |
| 2416        | CakSNP2416     | <i>Kabuli</i>    | Ca_Kabuli_Chr02              | 8719725                        | (T/A)       |
| 2417        | CakSNP2417     | <i>Kabuli</i>    | Ca_Kabuli_Chr02              | 8734136                        | (G/A)       |
| 2418        | CakSNP2418     | <i>Kabuli</i>    | Ca_Kabuli_Chr02              | 8802884                        | (A/G)       |
| 2419        | CakSNP2419     | <i>Kabuli</i>    | Ca_Kabuli_Chr02              | 9458933                        | (C/T)       |
| 2420        | CakSNP2420     | <i>Kabuli</i>    | Ca_Kabuli_Chr02              | 9458985                        | (A/G)       |
| 2421        | CakSNP2421     | <i>Kabuli</i>    | Ca_Kabuli_Chr02              | 9473339                        | (T/C)       |
| 2422        | CakSNP2422     | <i>Kabuli</i>    | Ca_Kabuli_Chr02              | 9473353                        | (C/A)       |
| 2423        | CakSNP2423     | <i>Kabuli</i>    | Ca_Kabuli_Chr02              | 9473362                        | (G/A)       |
| 2424        | CakSNP2424     | <i>Kabuli</i>    | Ca_Kabuli_Chr02              | 9473380                        | (A/G)       |
| 2425        | CakSNP2425     | <i>Kabuli</i>    | Ca_Kabuli_Chr02              | 9473393                        | (G/A)       |
| 2426        | CakSNP2426     | <i>Kabuli</i>    | Ca_Kabuli_Chr02              | 9473474                        | (T/A)       |
| 2427        | CakSNP2427     | <i>Kabuli</i>    | Ca_Kabuli_Chr02              | 9473452                        | (A/G)       |
| 2428        | CakSNP2428     | <i>Kabuli</i>    | Ca_Kabuli_Chr02              | 9473430                        | (A/G)       |
| 2429        | CakSNP2429     | <i>Kabuli</i>    | Ca_Kabuli_Chr02              | 9621953                        | (A/C)       |
| 2430        | CakSNP2430     | <i>Kabuli</i>    | Ca_Kabuli_Chr02              | 9740018                        | (G/A)       |
| 2431        | CakSNP2431     | <i>Kabuli</i>    | Ca_Kabuli_Chr02              | 9740017                        | (C/T)       |

| <b>S.N.</b> | <b>SNP IDs</b> | <b>Cultivars</b> | <b>Chromosomes/scaffolds</b> | <b>Physical positions (bp)</b> | <b>SNPs</b> |
|-------------|----------------|------------------|------------------------------|--------------------------------|-------------|
| 2432        | CakSNP2432     | <i>Kabuli</i>    | Ca_Kabuli_Chr02              | 9740010                        | (A/G)       |
| 2433        | CakSNP2433     | <i>Kabuli</i>    | Ca_Kabuli_Chr02              | 9740007                        | (A/G)       |
| 2434        | CakSNP2434     | <i>Kabuli</i>    | Ca_Kabuli_Chr02              | 9739980                        | (G/C)       |
| 2435        | CakSNP2435     | <i>Kabuli</i>    | Ca_Kabuli_Chr02              | 9739974                        | (T/C)       |
| 2436        | CakSNP2436     | <i>Kabuli</i>    | Ca_Kabuli_Chr02              | 9739959                        | (T/C)       |
| 2437        | CakSNP2437     | <i>Kabuli</i>    | Ca_Kabuli_Chr02              | 9739965                        | (A/G)       |
| 2438        | CakSNP2438     | <i>Kabuli</i>    | Ca_Kabuli_Chr02              | 9756955                        | (G/A)       |
| 2439        | CakSNP2439     | <i>Kabuli</i>    | Ca_Kabuli_Chr02              | 9756946                        | (C/T)       |
| 2440        | CakSNP2440     | <i>Kabuli</i>    | Ca_Kabuli_Chr02              | 9756910                        | (G/A)       |
| 2441        | CakSNP2441     | <i>Kabuli</i>    | Ca_Kabuli_Chr02              | 9756887                        | (G/T)       |
| 2442        | CakSNP2442     | <i>Kabuli</i>    | Ca_Kabuli_Chr02              | 9823224                        | (G/A)       |
| 2443        | CakSNP2443     | <i>Kabuli</i>    | Ca_Kabuli_Chr02              | 9823165                        | (T/C)       |
| 2444        | CakSNP2444     | <i>Kabuli</i>    | Ca_Kabuli_Chr02              | 9825526                        | (C/G)       |
| 2445        | CakSNP2445     | <i>Kabuli</i>    | Ca_Kabuli_Chr02              | 9841625                        | (A/G)       |
| 2446        | CakSNP2446     | <i>Kabuli</i>    | Ca_Kabuli_Chr02              | 9862794                        | (A/G)       |
| 2447        | CakSNP2447     | <i>Kabuli</i>    | Ca_Kabuli_Chr02              | 9906042                        | (T/G)       |
| 2448        | CakSNP2448     | <i>Kabuli</i>    | Ca_Kabuli_Chr02              | 9906077                        | (T/A)       |
| 2449        | CakSNP2449     | <i>Kabuli</i>    | Ca_Kabuli_Chr02              | 9918536                        | (T/A)       |
| 2450        | CakSNP2450     | <i>Kabuli</i>    | Ca_Kabuli_Chr02              | 9943370                        | (A/G)       |
| 2451        | CakSNP2451     | <i>Kabuli</i>    | Ca_Kabuli_Chr02              | 9943374                        | (C/T)       |
| 2452        | CakSNP2452     | <i>Kabuli</i>    | Ca_Kabuli_Chr02              | 9943404                        | (T/G)       |
| 2453        | CakSNP2453     | <i>Kabuli</i>    | Ca_Kabuli_Chr02              | 9986639                        | (C/T)       |
| 2454        | CakSNP2454     | <i>Kabuli</i>    | Ca_Kabuli_Chr02              | 9986683                        | (C/T)       |
| 2455        | CakSNP2455     | <i>Kabuli</i>    | Ca_Kabuli_Chr02              | 10004694                       | (G/A)       |
| 2456        | CakSNP2456     | <i>Kabuli</i>    | Ca_Kabuli_Chr02              | 10025451                       | (G/A)       |
| 2457        | CakSNP2457     | <i>Kabuli</i>    | Ca_Kabuli_Chr02              | 10033991                       | (T/C)       |
| 2458        | CakSNP2458     | <i>Kabuli</i>    | Ca_Kabuli_Chr02              | 10060196                       | (G/T)       |
| 2459        | CakSNP2459     | <i>Kabuli</i>    | Ca_Kabuli_Chr02              | 10060200                       | (G/T)       |
| 2460        | CakSNP2460     | <i>Kabuli</i>    | Ca_Kabuli_Chr02              | 10060207                       | (C/T)       |
| 2461        | CakSNP2461     | <i>Kabuli</i>    | Ca_Kabuli_Chr02              | 10067093                       | (G/C)       |
| 2462        | CakSNP2462     | <i>Kabuli</i>    | Ca_Kabuli_Chr02              | 10067078                       | (T/G)       |
| 2463        | CakSNP2463     | <i>Kabuli</i>    | Ca_Kabuli_Chr02              | 10067061                       | (T/G)       |
| 2464        | CakSNP2464     | <i>Kabuli</i>    | Ca_Kabuli_Chr02              | 10067195                       | (T/A)       |
| 2465        | CakSNP2465     | <i>Kabuli</i>    | Ca_Kabuli_Chr02              | 10067262                       | (A/C)       |
| 2466        | CakSNP2466     | <i>Kabuli</i>    | Ca_Kabuli_Chr02              | 10067278                       | (G/T)       |
| 2467        | CakSNP2467     | <i>Kabuli</i>    | Ca_Kabuli_Chr02              | 10067285                       | (T/G)       |
| 2468        | CakSNP2468     | <i>Kabuli</i>    | Ca_Kabuli_Chr02              | 10067286                       | (A/T)       |
| 2469        | CakSNP2469     | <i>Kabuli</i>    | Ca_Kabuli_Chr02              | 10067451                       | (A/T)       |

| <b>S.N.</b> | <b>SNP IDs</b> | <b>Cultivars</b> | <b>Chromosomes/scaffolds</b> | <b>Physical positions (bp)</b> | <b>SNPs</b> |
|-------------|----------------|------------------|------------------------------|--------------------------------|-------------|
| 2470        | CakSNP2470     | <i>Kabuli</i>    | Ca_Kabuli_Chr02              | 10067516                       | (G/A)       |
| 2471        | CakSNP2471     | <i>Kabuli</i>    | Ca_Kabuli_Chr02              | 10067538                       | (C/T)       |
| 2472        | CakSNP2472     | <i>Kabuli</i>    | Ca_Kabuli_Chr02              | 10068214                       | (A/G)       |
| 2473        | CakSNP2473     | <i>Kabuli</i>    | Ca_Kabuli_Chr02              | 10220396                       | (T/C)       |
| 2474        | CakSNP2474     | <i>Kabuli</i>    | Ca_Kabuli_Chr02              | 10270474                       | (C/A)       |
| 2475        | CakSNP2475     | <i>Kabuli</i>    | Ca_Kabuli_Chr02              | 10284426                       | (C/G)       |
| 2476        | CakSNP2476     | <i>Kabuli</i>    | Ca_Kabuli_Chr02              | 10294698                       | (A/G)       |
| 2477        | CakSNP2477     | <i>Kabuli</i>    | Ca_Kabuli_Chr02              | 10294635                       | (T/C)       |
| 2478        | CakSNP2478     | <i>Kabuli</i>    | Ca_Kabuli_Chr02              | 10322943                       | (T/C)       |
| 2479        | CakSNP2479     | <i>Kabuli</i>    | Ca_Kabuli_Chr02              | 10352705                       | (T/A)       |
| 2480        | CakSNP2480     | <i>Kabuli</i>    | Ca_Kabuli_Chr02              | 10358484                       | (C/T)       |
| 2481        | CakSNP2481     | <i>Kabuli</i>    | Ca_Kabuli_Chr02              | 10358496                       | (G/T)       |
| 2482        | CakSNP2482     | <i>Kabuli</i>    | Ca_Kabuli_Chr02              | 10377695                       | (G/A)       |
| 2483        | CakSNP2483     | <i>Kabuli</i>    | Ca_Kabuli_Chr02              | 10434727                       | (T/C)       |
| 2484        | CakSNP2484     | <i>Kabuli</i>    | Ca_Kabuli_Chr02              | 10434726                       | (G/C)       |
| 2485        | CakSNP2485     | <i>Kabuli</i>    | Ca_Kabuli_Chr02              | 10434714                       | (C/G)       |
| 2486        | CakSNP2486     | <i>Kabuli</i>    | Ca_Kabuli_Chr02              | 10540735                       | (C/T)       |
| 2487        | CakSNP2487     | <i>Kabuli</i>    | Ca_Kabuli_Chr02              | 10637631                       | (C/A)       |
| 2488        | CakSNP2488     | <i>Kabuli</i>    | Ca_Kabuli_Chr02              | 10656518                       | (A/T)       |
| 2489        | CakSNP2489     | <i>Kabuli</i>    | Ca_Kabuli_Chr02              | 10705902                       | (C/A)       |
| 2490        | CakSNP2490     | <i>Kabuli</i>    | Ca_Kabuli_Chr02              | 10705923                       | (T/A)       |
| 2491        | CakSNP2491     | <i>Kabuli</i>    | Ca_Kabuli_Chr02              | 10705979                       | (C/A)       |
| 2492        | CakSNP2492     | <i>Kabuli</i>    | Ca_Kabuli_Chr02              | 10705982                       | (C/T)       |
| 2493        | CakSNP2493     | <i>Kabuli</i>    | Ca_Kabuli_Chr02              | 10760939                       | (G/A)       |
| 2494        | CakSNP2494     | <i>Kabuli</i>    | Ca_Kabuli_Chr02              | 10761036                       | (C/G)       |
| 2495        | CakSNP2495     | <i>Kabuli</i>    | Ca_Kabuli_Chr02              | 11799472                       | (G/A)       |
| 2496        | CakSNP2496     | <i>Kabuli</i>    | Ca_Kabuli_Chr02              | 11799462                       | (G/A)       |
| 2497        | CakSNP2497     | <i>Kabuli</i>    | Ca_Kabuli_Chr02              | 12252285                       | (T/G)       |
| 2498        | CakSNP2498     | <i>Kabuli</i>    | Ca_Kabuli_Chr02              | 12252370                       | (A/G)       |
| 2499        | CakSNP2499     | <i>Kabuli</i>    | Ca_Kabuli_Chr02              | 12278583                       | (G/A)       |
| 2500        | CakSNP2500     | <i>Kabuli</i>    | Ca_Kabuli_Chr02              | 12278584                       | (T/C)       |
| 2501        | CakSNP2501     | <i>Kabuli</i>    | Ca_Kabuli_Chr02              | 12278606                       | (T/C)       |
| 2502        | CakSNP2502     | <i>Kabuli</i>    | Ca_Kabuli_Chr02              | 12281599                       | (A/C)       |
| 2503        | CakSNP2503     | <i>Kabuli</i>    | Ca_Kabuli_Chr02              | 12357732                       | (A/G)       |
| 2504        | CakSNP2504     | <i>Kabuli</i>    | Ca_Kabuli_Chr02              | 12389166                       | (G/T)       |
| 2505        | CakSNP2505     | <i>Kabuli</i>    | Ca_Kabuli_Chr02              | 12389112                       | (G/A)       |
| 2506        | CakSNP2506     | <i>Kabuli</i>    | Ca_Kabuli_Chr02              | 12515595                       | (A/G)       |
| 2507        | CakSNP2507     | <i>Kabuli</i>    | Ca_Kabuli_Chr02              | 12528825                       | (C/G)       |

| <b>S.N.</b> | <b>SNP IDs</b> | <b>Cultivars</b> | <b>Chromosomes/scaffolds</b> | <b>Physical positions (bp)</b> | <b>SNPs</b> |
|-------------|----------------|------------------|------------------------------|--------------------------------|-------------|
| 2508        | CakSNP2508     | <i>Kabuli</i>    | Ca_Kabuli_Chr02              | 12710137                       | (G/A)       |
| 2509        | CakSNP2509     | <i>Kabuli</i>    | Ca_Kabuli_Chr02              | 12737814                       | (T/C)       |
| 2510        | CakSNP2510     | <i>Kabuli</i>    | Ca_Kabuli_Chr02              | 12794438                       | (G/A)       |
| 2511        | CakSNP2511     | <i>Kabuli</i>    | Ca_Kabuli_Chr02              | 12854610                       | (A/G)       |
| 2512        | CakSNP2512     | <i>Kabuli</i>    | Ca_Kabuli_Chr02              | 12854591                       | (T/A)       |
| 2513        | CakSNP2513     | <i>Kabuli</i>    | Ca_Kabuli_Chr02              | 12854586                       | (G/A)       |
| 2514        | CakSNP2514     | <i>Kabuli</i>    | Ca_Kabuli_Chr02              | 12862414                       | (G/C)       |
| 2515        | CakSNP2515     | <i>Kabuli</i>    | Ca_Kabuli_Chr02              | 13079417                       | (T/G)       |
| 2516        | CakSNP2516     | <i>Kabuli</i>    | Ca_Kabuli_Chr02              | 13079445                       | (T/G)       |
| 2517        | CakSNP2517     | <i>Kabuli</i>    | Ca_Kabuli_Chr02              | 13217781                       | (T/C)       |
| 2518        | CakSNP2518     | <i>Kabuli</i>    | Ca_Kabuli_Chr02              | 13355018                       | (T/G)       |
| 2519        | CakSNP2519     | <i>Kabuli</i>    | Ca_Kabuli_Chr02              | 13355022                       | (G/T)       |
| 2520        | CakSNP2520     | <i>Kabuli</i>    | Ca_Kabuli_Chr02              | 13355033                       | (A/T)       |
| 2521        | CakSNP2521     | <i>Kabuli</i>    | Ca_Kabuli_Chr02              | 13355615                       | (T/G)       |
| 2522        | CakSNP2522     | <i>Kabuli</i>    | Ca_Kabuli_Chr02              | 13425568                       | (T/A)       |
| 2523        | CakSNP2523     | <i>Kabuli</i>    | Ca_Kabuli_Chr02              | 13434904                       | (G/A)       |
| 2524        | CakSNP2524     | <i>Kabuli</i>    | Ca_Kabuli_Chr02              | 13434884                       | (T/A)       |
| 2525        | CakSNP2525     | <i>Kabuli</i>    | Ca_Kabuli_Chr02              | 13435043                       | (C/T)       |
| 2526        | CakSNP2526     | <i>Kabuli</i>    | Ca_Kabuli_Chr02              | 13435030                       | (G/C)       |
| 2527        | CakSNP2527     | <i>Kabuli</i>    | Ca_Kabuli_Chr02              | 13434995                       | (A/C)       |
| 2528        | CakSNP2528     | <i>Kabuli</i>    | Ca_Kabuli_Chr02              | 13437317                       | (A/G)       |
| 2529        | CakSNP2529     | <i>Kabuli</i>    | Ca_Kabuli_Chr02              | 13529057                       | (G/A)       |
| 2530        | CakSNP2530     | <i>Kabuli</i>    | Ca_Kabuli_Chr02              | 13552505                       | (T/A)       |
| 2531        | CakSNP2531     | <i>Kabuli</i>    | Ca_Kabuli_Chr02              | 13554038                       | (T/C)       |
| 2532        | CakSNP2532     | <i>Kabuli</i>    | Ca_Kabuli_Chr02              | 13554045                       | (T/C)       |
| 2533        | CakSNP2533     | <i>Kabuli</i>    | Ca_Kabuli_Chr02              | 13554047                       | (A/T)       |
| 2534        | CakSNP2534     | <i>Kabuli</i>    | Ca_Kabuli_Chr02              | 13703083                       | (G/A)       |
| 2535        | CakSNP2535     | <i>Kabuli</i>    | Ca_Kabuli_Chr02              | 13782906                       | (C/A)       |
| 2536        | CakSNP2536     | <i>Kabuli</i>    | Ca_Kabuli_Chr02              | 14101913                       | (T/A)       |
| 2537        | CakSNP2537     | <i>Kabuli</i>    | Ca_Kabuli_Chr02              | 14134413                       | (A/C)       |
| 2538        | CakSNP2538     | <i>Kabuli</i>    | Ca_Kabuli_Chr02              | 14134676                       | (T/C)       |
| 2539        | CakSNP2539     | <i>Kabuli</i>    | Ca_Kabuli_Chr02              | 14136062                       | (C/A)       |
| 2540        | CakSNP2540     | <i>Kabuli</i>    | Ca_Kabuli_Chr02              | 14136019                       | (A/G)       |
| 2541        | CakSNP2541     | <i>Kabuli</i>    | Ca_Kabuli_Chr02              | 14136013                       | (T/G)       |
| 2542        | CakSNP2542     | <i>Kabuli</i>    | Ca_Kabuli_Chr02              | 14136223                       | (A/C)       |
| 2543        | CakSNP2543     | <i>Kabuli</i>    | Ca_Kabuli_Chr02              | 15160301                       | (T/C)       |
| 2544        | CakSNP2544     | <i>Kabuli</i>    | Ca_Kabuli_Chr02              | 15178565                       | (G/A)       |
| 2545        | CakSNP2545     | <i>Kabuli</i>    | Ca_Kabuli_Chr02              | 15178564                       | (A/G)       |

| <b>S.N.</b> | <b>SNP IDs</b> | <b>Cultivars</b> | <b>Chromosomes/scaffolds</b> | <b>Physical positions (bp)</b> | <b>SNPs</b> |
|-------------|----------------|------------------|------------------------------|--------------------------------|-------------|
| 2546        | CakSNP2546     | <i>Kabuli</i>    | Ca_Kabuli_Chr02              | 15178540                       | (A/G)       |
| 2547        | CakSNP2547     | <i>Kabuli</i>    | Ca_Kabuli_Chr02              | 15181635                       | (G/T)       |
| 2548        | CakSNP2548     | <i>Kabuli</i>    | Ca_Kabuli_Chr02              | 15234951                       | (C/A)       |
| 2549        | CakSNP2549     | <i>Kabuli</i>    | Ca_Kabuli_Chr02              | 15389412                       | (G/A)       |
| 2550        | CakSNP2550     | <i>Kabuli</i>    | Ca_Kabuli_Chr02              | 15390673                       | (A/G)       |
| 2551        | CakSNP2551     | <i>Kabuli</i>    | Ca_Kabuli_Chr02              | 15390731                       | (G/A)       |
| 2552        | CakSNP2552     | <i>Kabuli</i>    | Ca_Kabuli_Chr02              | 15390684                       | (A/G)       |
| 2553        | CakSNP2553     | <i>Kabuli</i>    | Ca_Kabuli_Chr02              | 15688657                       | (G/T)       |
| 2554        | CakSNP2554     | <i>Kabuli</i>    | Ca_Kabuli_Chr02              | 15817688                       | (T/C)       |
| 2555        | CakSNP2555     | <i>Kabuli</i>    | Ca_Kabuli_Chr02              | 16460174                       | (G/A)       |
| 2556        | CakSNP2556     | <i>Kabuli</i>    | Ca_Kabuli_Chr02              | 16460142                       | (A/G)       |
| 2557        | CakSNP2557     | <i>Kabuli</i>    | Ca_Kabuli_Chr02              | 16460097                       | (C/A)       |
| 2558        | CakSNP2558     | <i>Kabuli</i>    | Ca_Kabuli_Chr02              | 16460106                       | (C/T)       |
| 2559        | CakSNP2559     | <i>Kabuli</i>    | Ca_Kabuli_Chr02              | 16460175                       | (C/A)       |
| 2560        | CakSNP2560     | <i>Kabuli</i>    | Ca_Kabuli_Chr02              | 16462095                       | (A/G)       |
| 2561        | CakSNP2561     | <i>Kabuli</i>    | Ca_Kabuli_Chr02              | 16462089                       | (C/T)       |
| 2562        | CakSNP2562     | <i>Kabuli</i>    | Ca_Kabuli_Chr02              | 16462056                       | (A/C)       |
| 2563        | CakSNP2563     | <i>Kabuli</i>    | Ca_Kabuli_Chr02              | 16462038                       | (G/T)       |
| 2564        | CakSNP2564     | <i>Kabuli</i>    | Ca_Kabuli_Chr02              | 16555733                       | (C/T)       |
| 2565        | CakSNP2565     | <i>Kabuli</i>    | Ca_Kabuli_Chr02              | 16555790                       | (C/G)       |
| 2566        | CakSNP2566     | <i>Kabuli</i>    | Ca_Kabuli_Chr02              | 16563117                       | (A/T)       |
| 2567        | CakSNP2567     | <i>Kabuli</i>    | Ca_Kabuli_Chr02              | 16563121                       | (A/T)       |
| 2568        | CakSNP2568     | <i>Kabuli</i>    | Ca_Kabuli_Chr02              | 16563123                       | (C/T)       |
| 2569        | CakSNP2569     | <i>Kabuli</i>    | Ca_Kabuli_Chr02              | 16563125                       | (A/T)       |
| 2570        | CakSNP2570     | <i>Kabuli</i>    | Ca_Kabuli_Chr02              | 16563133                       | (A/T)       |
| 2571        | CakSNP2571     | <i>Kabuli</i>    | Ca_Kabuli_Chr02              | 16705119                       | (C/T)       |
| 2572        | CakSNP2572     | <i>Kabuli</i>    | Ca_Kabuli_Chr02              | 17450780                       | (C/T)       |
| 2573        | CakSNP2573     | <i>Kabuli</i>    | Ca_Kabuli_Chr02              | 17578623                       | (G/A)       |
| 2574        | CakSNP2574     | <i>Kabuli</i>    | Ca_Kabuli_Chr02              | 17578633                       | (C/G)       |
| 2575        | CakSNP2575     | <i>Kabuli</i>    | Ca_Kabuli_Chr02              | 17578659                       | (A/G)       |
| 2576        | CakSNP2576     | <i>Kabuli</i>    | Ca_Kabuli_Chr02              | 17578689                       | (G/A)       |
| 2577        | CakSNP2577     | <i>Kabuli</i>    | Ca_Kabuli_Chr02              | 17578663                       | (C/A)       |
| 2578        | CakSNP2578     | <i>Kabuli</i>    | Ca_Kabuli_Chr02              | 17578676                       | (T/C)       |
| 2579        | CakSNP2579     | <i>Kabuli</i>    | Ca_Kabuli_Chr02              | 17578701                       | (A/C)       |
| 2580        | CakSNP2580     | <i>Kabuli</i>    | Ca_Kabuli_Chr02              | 17578706                       | (A/T)       |
| 2581        | CakSNP2581     | <i>Kabuli</i>    | Ca_Kabuli_Chr02              | 17578726                       | (A/T)       |
| 2582        | CakSNP2582     | <i>Kabuli</i>    | Ca_Kabuli_Chr02              | 17578740                       | (A/G)       |
| 2583        | CakSNP2583     | <i>Kabuli</i>    | Ca_Kabuli_Chr02              | 17681915                       | (C/T)       |

| <b>S.N.</b> | <b>SNP IDs</b> | <b>Cultivars</b> | <b>Chromosomes/scaffolds</b> | <b>Physical positions (bp)</b> | <b>SNPs</b> |
|-------------|----------------|------------------|------------------------------|--------------------------------|-------------|
| 2584        | CakSNP2584     | <i>Kabuli</i>    | Ca_Kabuli_Chr02              | 17716022                       | (A/T)       |
| 2585        | CakSNP2585     | <i>Kabuli</i>    | Ca_Kabuli_Chr02              | 17727340                       | (G/A)       |
| 2586        | CakSNP2586     | <i>Kabuli</i>    | Ca_Kabuli_Chr02              | 17727362                       | (G/C)       |
| 2587        | CakSNP2587     | <i>Kabuli</i>    | Ca_Kabuli_Chr02              | 17727403                       | (C/T)       |
| 2588        | CakSNP2588     | <i>Kabuli</i>    | Ca_Kabuli_Chr02              | 17839209                       | (T/A)       |
| 2589        | CakSNP2589     | <i>Kabuli</i>    | Ca_Kabuli_Chr02              | 17839297                       | (T/C)       |
| 2590        | CakSNP2590     | <i>Kabuli</i>    | Ca_Kabuli_Chr02              | 17910111                       | (C/G)       |
| 2591        | CakSNP2591     | <i>Kabuli</i>    | Ca_Kabuli_Chr02              | 17910145                       | (C/T)       |
| 2592        | CakSNP2592     | <i>Kabuli</i>    | Ca_Kabuli_Chr02              | 17910783                       | (A/T)       |
| 2593        | CakSNP2593     | <i>Kabuli</i>    | Ca_Kabuli_Chr02              | 18312200                       | (T/C)       |
| 2594        | CakSNP2594     | <i>Kabuli</i>    | Ca_Kabuli_Chr02              | 18395345                       | (A/C)       |
| 2595        | CakSNP2595     | <i>Kabuli</i>    | Ca_Kabuli_Chr02              | 18395410                       | (T/C)       |
| 2596        | CakSNP2596     | <i>Kabuli</i>    | Ca_Kabuli_Chr02              | 18395378                       | (A/G)       |
| 2597        | CakSNP2597     | <i>Kabuli</i>    | Ca_Kabuli_Chr02              | 18546345                       | (T/C)       |
| 2598        | CakSNP2598     | <i>Kabuli</i>    | Ca_Kabuli_Chr02              | 18546366                       | (A/T)       |
| 2599        | CakSNP2599     | <i>Kabuli</i>    | Ca_Kabuli_Chr02              | 18631367                       | (T/A)       |
| 2600        | CakSNP2600     | <i>Kabuli</i>    | Ca_Kabuli_Chr02              | 18631383                       | (A/G)       |
| 2601        | CakSNP2601     | <i>Kabuli</i>    | Ca_Kabuli_Chr02              | 18631404                       | (T/G)       |
| 2602        | CakSNP2602     | <i>Kabuli</i>    | Ca_Kabuli_Chr02              | 18631412                       | (T/G)       |
| 2603        | CakSNP2603     | <i>Kabuli</i>    | Ca_Kabuli_Chr02              | 18631522                       | (A/C)       |
| 2604        | CakSNP2604     | <i>Kabuli</i>    | Ca_Kabuli_Chr02              | 18671692                       | (C/A)       |
| 2605        | CakSNP2605     | <i>Kabuli</i>    | Ca_Kabuli_Chr02              | 18671672                       | (T/A)       |
| 2606        | CakSNP2606     | <i>Kabuli</i>    | Ca_Kabuli_Chr02              | 18671666                       | (C/T)       |
| 2607        | CakSNP2607     | <i>Kabuli</i>    | Ca_Kabuli_Chr02              | 18671637                       | (G/A)       |
| 2608        | CakSNP2608     | <i>Kabuli</i>    | Ca_Kabuli_Chr02              | 18671618                       | (T/G)       |
| 2609        | CakSNP2609     | <i>Kabuli</i>    | Ca_Kabuli_Chr02              | 18671723                       | (C/G)       |
| 2610        | CakSNP2610     | <i>Kabuli</i>    | Ca_Kabuli_Chr02              | 18671746                       | (C/T)       |
| 2611        | CakSNP2611     | <i>Kabuli</i>    | Ca_Kabuli_Chr02              | 18671756                       | (T/A)       |
| 2612        | CakSNP2612     | <i>Kabuli</i>    | Ca_Kabuli_Chr02              | 18671765                       | (C/A)       |
| 2613        | CakSNP2613     | <i>Kabuli</i>    | Ca_Kabuli_Chr02              | 18671767                       | (G/C)       |
| 2614        | CakSNP2614     | <i>Kabuli</i>    | Ca_Kabuli_Chr02              | 18671785                       | (G/A)       |
| 2615        | CakSNP2615     | <i>Kabuli</i>    | Ca_Kabuli_Chr02              | 18671824                       | (C/T)       |
| 2616        | CakSNP2616     | <i>Kabuli</i>    | Ca_Kabuli_Chr02              | 20392224                       | (A/G)       |
| 2617        | CakSNP2617     | <i>Kabuli</i>    | Ca_Kabuli_Chr02              | 20762187                       | (A/G)       |
| 2618        | CakSNP2618     | <i>Kabuli</i>    | Ca_Kabuli_Chr02              | 20762205                       | (A/T)       |
| 2619        | CakSNP2619     | <i>Kabuli</i>    | Ca_Kabuli_Chr02              | 21000509                       | (C/T)       |
| 2620        | CakSNP2620     | <i>Kabuli</i>    | Ca_Kabuli_Chr02              | 21000466                       | (C/T)       |
| 2621        | CakSNP2621     | <i>Kabuli</i>    | Ca_Kabuli_Chr02              | 21000463                       | (C/T)       |

| <b>S.N.</b> | <b>SNP IDs</b> | <b>Cultivars</b> | <b>Chromosomes/scaffolds</b> | <b>Physical positions (bp)</b> | <b>SNPs</b> |
|-------------|----------------|------------------|------------------------------|--------------------------------|-------------|
| 2622        | CakSNP2622     | <i>Kabuli</i>    | Ca_Kabuli_Chr02              | 21849874                       | (A/T)       |
| 2623        | CakSNP2623     | <i>Kabuli</i>    | Ca_Kabuli_Chr02              | 21906952                       | (A/G)       |
| 2624        | CakSNP2624     | <i>Kabuli</i>    | Ca_Kabuli_Chr02              | 21965365                       | (T/C)       |
| 2625        | CakSNP2625     | <i>Kabuli</i>    | Ca_Kabuli_Chr02              | 22158593                       | (C/T)       |
| 2626        | CakSNP2626     | <i>Kabuli</i>    | Ca_Kabuli_Chr02              | 22158602                       | (C/T)       |
| 2627        | CakSNP2627     | <i>Kabuli</i>    | Ca_Kabuli_Chr02              | 22190700                       | (C/T)       |
| 2628        | CakSNP2628     | <i>Kabuli</i>    | Ca_Kabuli_Chr02              | 22190743                       | (C/T)       |
| 2629        | CakSNP2629     | <i>Kabuli</i>    | Ca_Kabuli_Chr02              | 22190748                       | (G/T)       |
| 2630        | CakSNP2630     | <i>Kabuli</i>    | Ca_Kabuli_Chr02              | 22190751                       | (C/T)       |
| 2631        | CakSNP2631     | <i>Kabuli</i>    | Ca_Kabuli_Chr02              | 22190756                       | (C/A)       |
| 2632        | CakSNP2632     | <i>Kabuli</i>    | Ca_Kabuli_Chr02              | 22190753                       | (C/T)       |
| 2633        | CakSNP2633     | <i>Kabuli</i>    | Ca_Kabuli_Chr02              | 22190790                       | (G/A)       |
| 2634        | CakSNP2634     | <i>Kabuli</i>    | Ca_Kabuli_Chr02              | 22190815                       | (C/T)       |
| 2635        | CakSNP2635     | <i>Kabuli</i>    | Ca_Kabuli_Chr02              | 22205024                       | (G/C)       |
| 2636        | CakSNP2636     | <i>Kabuli</i>    | Ca_Kabuli_Chr02              | 22347405                       | (C/T)       |
| 2637        | CakSNP2637     | <i>Kabuli</i>    | Ca_Kabuli_Chr02              | 22415930                       | (C/T)       |
| 2638        | CakSNP2638     | <i>Kabuli</i>    | Ca_Kabuli_Chr02              | 22416899                       | (A/C)       |
| 2639        | CakSNP2639     | <i>Kabuli</i>    | Ca_Kabuli_Chr02              | 22419501                       | (C/G)       |
| 2640        | CakSNP2640     | <i>Kabuli</i>    | Ca_Kabuli_Chr02              | 22419513                       | (T/C)       |
| 2641        | CakSNP2641     | <i>Kabuli</i>    | Ca_Kabuli_Chr02              | 22419514                       | (C/T)       |
| 2642        | CakSNP2642     | <i>Kabuli</i>    | Ca_Kabuli_Chr02              | 22419529                       | (T/C)       |
| 2643        | CakSNP2643     | <i>Kabuli</i>    | Ca_Kabuli_Chr02              | 22419625                       | (C/T)       |
| 2644        | CakSNP2644     | <i>Kabuli</i>    | Ca_Kabuli_Chr02              | 22419633                       | (C/T)       |
| 2645        | CakSNP2645     | <i>Kabuli</i>    | Ca_Kabuli_Chr02              | 22419634                       | (G/C)       |
| 2646        | CakSNP2646     | <i>Kabuli</i>    | Ca_Kabuli_Chr02              | 22419679                       | (G/A)       |
| 2647        | CakSNP2647     | <i>Kabuli</i>    | Ca_Kabuli_Chr02              | 22457234                       | (G/A)       |
| 2648        | CakSNP2648     | <i>Kabuli</i>    | Ca_Kabuli_Chr02              | 22457221                       | (T/A)       |
| 2649        | CakSNP2649     | <i>Kabuli</i>    | Ca_Kabuli_Chr02              | 22457215                       | (G/A)       |
| 2650        | CakSNP2650     | <i>Kabuli</i>    | Ca_Kabuli_Chr02              | 22457181                       | (G/T)       |
| 2651        | CakSNP2651     | <i>Kabuli</i>    | Ca_Kabuli_Chr02              | 22457233                       | (C/T)       |
| 2652        | CakSNP2652     | <i>Kabuli</i>    | Ca_Kabuli_Chr02              | 22457255                       | (C/T)       |
| 2653        | CakSNP2653     | <i>Kabuli</i>    | Ca_Kabuli_Chr02              | 22457263                       | (G/A)       |
| 2654        | CakSNP2654     | <i>Kabuli</i>    | Ca_Kabuli_Chr02              | 22457257                       | (G/A)       |
| 2655        | CakSNP2655     | <i>Kabuli</i>    | Ca_Kabuli_Chr02              | 22483072                       | (C/T)       |
| 2656        | CakSNP2656     | <i>Kabuli</i>    | Ca_Kabuli_Chr02              | 22483067                       | (G/A)       |
| 2657        | CakSNP2657     | <i>Kabuli</i>    | Ca_Kabuli_Chr02              | 22483052                       | (C/T)       |
| 2658        | CakSNP2658     | <i>Kabuli</i>    | Ca_Kabuli_Chr02              | 22483019                       | (A/T)       |
| 2659        | CakSNP2659     | <i>Kabuli</i>    | Ca_Kabuli_Chr02              | 22703091                       | (A/C)       |



| <b>S.N.</b> | <b>SNP IDs</b> | <b>Cultivars</b> | <b>Chromosomes/scaffolds</b> | <b>Physical positions (bp)</b> | <b>SNPs</b> |
|-------------|----------------|------------------|------------------------------|--------------------------------|-------------|
| 2660        | CakSNP2660     | <i>Kabuli</i>    | Ca_Kabuli_Chr02              | 22820616                       | (C/G)       |
| 2661        | CakSNP2661     | <i>Kabuli</i>    | Ca_Kabuli_Chr02              | 22820588                       | (A/C)       |
| 2662        | CakSNP2662     | <i>Kabuli</i>    | Ca_Kabuli_Chr02              | 22897694                       | (G/A)       |
| 2663        | CakSNP2663     | <i>Kabuli</i>    | Ca_Kabuli_Chr02              | 22897647                       | (T/C)       |
| 2664        | CakSNP2664     | <i>Kabuli</i>    | Ca_Kabuli_Chr02              | 23123734                       | (C/T)       |
| 2665        | CakSNP2665     | <i>Kabuli</i>    | Ca_Kabuli_Chr02              | 23141564                       | (C/T)       |
| 2666        | CakSNP2666     | <i>Kabuli</i>    | Ca_Kabuli_Chr02              | 23181353                       | (C/T)       |
| 2667        | CakSNP2667     | <i>Kabuli</i>    | Ca_Kabuli_Chr02              | 23247801                       | (C/T)       |
| 2668        | CakSNP2668     | <i>Kabuli</i>    | Ca_Kabuli_Chr02              | 23282374                       | (T/C)       |
| 2669        | CakSNP2669     | <i>Kabuli</i>    | Ca_Kabuli_Chr02              | 23297412                       | (G/A)       |
| 2670        | CakSNP2670     | <i>Kabuli</i>    | Ca_Kabuli_Chr02              | 23329325                       | (G/T)       |
| 2671        | CakSNP2671     | <i>Kabuli</i>    | Ca_Kabuli_Chr02              | 23329424                       | (C/T)       |
| 2672        | CakSNP2672     | <i>Kabuli</i>    | Ca_Kabuli_Chr02              | 23329440                       | (G/A)       |
| 2673        | CakSNP2673     | <i>Kabuli</i>    | Ca_Kabuli_Chr02              | 23417518                       | (T/G)       |
| 2674        | CakSNP2674     | <i>Kabuli</i>    | Ca_Kabuli_Chr02              | 23435939                       | (A/G)       |
| 2675        | CakSNP2675     | <i>Kabuli</i>    | Ca_Kabuli_Chr02              | 23439966                       | (T/C)       |
| 2676        | CakSNP2676     | <i>Kabuli</i>    | Ca_Kabuli_Chr02              | 23441740                       | (A/G)       |
| 2677        | CakSNP2677     | <i>Kabuli</i>    | Ca_Kabuli_Chr02              | 23910254                       | (T/C)       |
| 2678        | CakSNP2678     | <i>Kabuli</i>    | Ca_Kabuli_Chr02              | 23961003                       | (G/A)       |
| 2679        | CakSNP2679     | <i>Kabuli</i>    | Ca_Kabuli_Chr02              | 24048087                       | (A/C)       |
| 2680        | CakSNP2680     | <i>Kabuli</i>    | Ca_Kabuli_Chr02              | 24098243                       | (T/C)       |
| 2681        | CakSNP2681     | <i>Kabuli</i>    | Ca_Kabuli_Chr02              | 24101371                       | (C/T)       |
| 2682        | CakSNP2682     | <i>Kabuli</i>    | Ca_Kabuli_Chr02              | 24164335                       | (A/T)       |
| 2683        | CakSNP2683     | <i>Kabuli</i>    | Ca_Kabuli_Chr02              | 24164840                       | (T/A)       |
| 2684        | CakSNP2684     | <i>Kabuli</i>    | Ca_Kabuli_Chr02              | 24164903                       | (T/C)       |
| 2685        | CakSNP2685     | <i>Kabuli</i>    | Ca_Kabuli_Chr02              | 24164900                       | (A/T)       |
| 2686        | CakSNP2686     | <i>Kabuli</i>    | Ca_Kabuli_Chr02              | 24221498                       | (G/T)       |
| 2687        | CakSNP2687     | <i>Kabuli</i>    | Ca_Kabuli_Chr02              | 24291665                       | (T/C)       |
| 2688        | CakSNP2688     | <i>Kabuli</i>    | Ca_Kabuli_Chr02              | 24353303                       | (A/G)       |
| 2689        | CakSNP2689     | <i>Kabuli</i>    | Ca_Kabuli_Chr02              | 24353243                       | (A/T)       |
| 2690        | CakSNP2690     | <i>Kabuli</i>    | Ca_Kabuli_Chr02              | 24511053                       | (G/A)       |
| 2691        | CakSNP2691     | <i>Kabuli</i>    | Ca_Kabuli_Chr02              | 24511114                       | (G/A)       |
| 2692        | CakSNP2692     | <i>Kabuli</i>    | Ca_Kabuli_Chr02              | 24511121                       | (G/A)       |
| 2693        | CakSNP2693     | <i>Kabuli</i>    | Ca_Kabuli_Chr02              | 24511119                       | (T/G)       |
| 2694        | CakSNP2694     | <i>Kabuli</i>    | Ca_Kabuli_Chr02              | 24511116                       | (C/A)       |
| 2695        | CakSNP2695     | <i>Kabuli</i>    | Ca_Kabuli_Chr02              | 24586360                       | (T/C)       |
| 2696        | CakSNP2696     | <i>Kabuli</i>    | Ca_Kabuli_Chr02              | 24709014                       | (C/G)       |
| 2697        | CakSNP2697     | <i>Kabuli</i>    | Ca_Kabuli_Chr02              | 24709103                       | (G/A)       |

| <b>S.N.</b> | <b>SNP IDs</b> | <b>Cultivars</b> | <b>Chromosomes/scaffolds</b> | <b>Physical positions (bp)</b> | <b>SNPs</b> |
|-------------|----------------|------------------|------------------------------|--------------------------------|-------------|
| 2698        | CakSNP2698     | <i>Kabuli</i>    | Ca_Kabuli_Chr02              | 24709139                       | (A/G)       |
| 2699        | CakSNP2699     | <i>Kabuli</i>    | Ca_Kabuli_Chr02              | 24709159                       | (T/A)       |
| 2700        | CakSNP2700     | <i>Kabuli</i>    | Ca_Kabuli_Chr02              | 24709295                       | (G/A)       |
| 2701        | CakSNP2701     | <i>Kabuli</i>    | Ca_Kabuli_Chr02              | 24741195                       | (C/T)       |
| 2702        | CakSNP2702     | <i>Kabuli</i>    | Ca_Kabuli_Chr02              | 24744726                       | (A/T)       |
| 2703        | CakSNP2703     | <i>Kabuli</i>    | Ca_Kabuli_Chr02              | 24817957                       | (G/A)       |
| 2704        | CakSNP2704     | <i>Kabuli</i>    | Ca_Kabuli_Chr02              | 24817945                       | (C/T)       |
| 2705        | CakSNP2705     | <i>Kabuli</i>    | Ca_Kabuli_Chr02              | 24817940                       | (G/A)       |
| 2706        | CakSNP2706     | <i>Kabuli</i>    | Ca_Kabuli_Chr02              | 24817934                       | (A/G)       |
| 2707        | CakSNP2707     | <i>Kabuli</i>    | Ca_Kabuli_Chr02              | 24817921                       | (G/A)       |
| 2708        | CakSNP2708     | <i>Kabuli</i>    | Ca_Kabuli_Chr02              | 24876355                       | (T/G)       |
| 2709        | CakSNP2709     | <i>Kabuli</i>    | Ca_Kabuli_Chr02              | 24911080                       | (T/C)       |
| 2710        | CakSNP2710     | <i>Kabuli</i>    | Ca_Kabuli_Chr02              | 24911154                       | (G/C)       |
| 2711        | CakSNP2711     | <i>Kabuli</i>    | Ca_Kabuli_Chr02              | 25022971                       | (A/G)       |
| 2712        | CakSNP2712     | <i>Kabuli</i>    | Ca_Kabuli_Chr02              | 25104319                       | (G/T)       |
| 2713        | CakSNP2713     | <i>Kabuli</i>    | Ca_Kabuli_Chr02              | 25104291                       | (A/T)       |
| 2714        | CakSNP2714     | <i>Kabuli</i>    | Ca_Kabuli_Chr02              | 25108249                       | (T/C)       |
| 2715        | CakSNP2715     | <i>Kabuli</i>    | Ca_Kabuli_Chr02              | 25126798                       | (C/T)       |
| 2716        | CakSNP2716     | <i>Kabuli</i>    | Ca_Kabuli_Chr02              | 25126804                       | (A/G)       |
| 2717        | CakSNP2717     | <i>Kabuli</i>    | Ca_Kabuli_Chr02              | 25126837                       | (G/T)       |
| 2718        | CakSNP2718     | <i>Kabuli</i>    | Ca_Kabuli_Chr02              | 25126910                       | (G/C)       |
| 2719        | CakSNP2719     | <i>Kabuli</i>    | Ca_Kabuli_Chr02              | 25163062                       | (C/G)       |
| 2720        | CakSNP2720     | <i>Kabuli</i>    | Ca_Kabuli_Chr02              | 25194583                       | (G/A)       |
| 2721        | CakSNP2721     | <i>Kabuli</i>    | Ca_Kabuli_Chr02              | 25317391                       | (A/G)       |
| 2722        | CakSNP2722     | <i>Kabuli</i>    | Ca_Kabuli_Chr02              | 25321993                       | (C/A)       |
| 2723        | CakSNP2723     | <i>Kabuli</i>    | Ca_Kabuli_Chr02              | 25493973                       | (T/G)       |
| 2724        | CakSNP2724     | <i>Kabuli</i>    | Ca_Kabuli_Chr02              | 25507637                       | (C/G)       |
| 2725        | CakSNP2725     | <i>Kabuli</i>    | Ca_Kabuli_Chr02              | 25507681                       | (A/G)       |
| 2726        | CakSNP2726     | <i>Kabuli</i>    | Ca_Kabuli_Chr02              | 25508579                       | (C/A)       |
| 2727        | CakSNP2727     | <i>Kabuli</i>    | Ca_Kabuli_Chr02              | 25508679                       | (A/G)       |
| 2728        | CakSNP2728     | <i>Kabuli</i>    | Ca_Kabuli_Chr02              | 25508660                       | (G/C)       |
| 2729        | CakSNP2729     | <i>Kabuli</i>    | Ca_Kabuli_Chr02              | 25508920                       | (G/A)       |
| 2730        | CakSNP2730     | <i>Kabuli</i>    | Ca_Kabuli_Chr02              | 25508969                       | (T/C)       |
| 2731        | CakSNP2731     | <i>Kabuli</i>    | Ca_Kabuli_Chr02              | 25508964                       | (A/C)       |
| 2732        | CakSNP2732     | <i>Kabuli</i>    | Ca_Kabuli_Chr02              | 25508963                       | (A/G)       |
| 2733        | CakSNP2733     | <i>Kabuli</i>    | Ca_Kabuli_Chr02              | 25508935                       | (A/T)       |
| 2734        | CakSNP2734     | <i>Kabuli</i>    | Ca_Kabuli_Chr02              | 25509087                       | (C/A)       |
| 2735        | CakSNP2735     | <i>Kabuli</i>    | Ca_Kabuli_Chr02              | 25509093                       | (C/G)       |

| <b>S.N.</b> | <b>SNP IDs</b> | <b>Cultivars</b> | <b>Chromosomes/scaffolds</b> | <b>Physical positions (bp)</b> | <b>SNPs</b> |
|-------------|----------------|------------------|------------------------------|--------------------------------|-------------|
| 2736        | CakSNP2736     | <i>Kabuli</i>    | Ca_Kabuli_Chr02              | 25509095                       | (G/A)       |
| 2737        | CakSNP2737     | <i>Kabuli</i>    | Ca_Kabuli_Chr02              | 25509203                       | (T/C)       |
| 2738        | CakSNP2738     | <i>Kabuli</i>    | Ca_Kabuli_Chr02              | 25509202                       | (T/A)       |
| 2739        | CakSNP2739     | <i>Kabuli</i>    | Ca_Kabuli_Chr02              | 25667417                       | (G/C)       |
| 2740        | CakSNP2740     | <i>Kabuli</i>    | Ca_Kabuli_Chr02              | 25667427                       | (T/C)       |
| 2741        | CakSNP2741     | <i>Kabuli</i>    | Ca_Kabuli_Chr02              | 25788124                       | (T/A)       |
| 2742        | CakSNP2742     | <i>Kabuli</i>    | Ca_Kabuli_Chr02              | 25788139                       | (T/C)       |
| 2743        | CakSNP2743     | <i>Kabuli</i>    | Ca_Kabuli_Chr02              | 25880318                       | (T/C)       |
| 2744        | CakSNP2744     | <i>Kabuli</i>    | Ca_Kabuli_Chr02              | 25898931                       | (T/C)       |
| 2745        | CakSNP2745     | <i>Kabuli</i>    | Ca_Kabuli_Chr02              | 25930490                       | (G/A)       |
| 2746        | CakSNP2746     | <i>Kabuli</i>    | Ca_Kabuli_Chr02              | 26051667                       | (T/G)       |
| 2747        | CakSNP2747     | <i>Kabuli</i>    | Ca_Kabuli_Chr02              | 26092881                       | (C/G)       |
| 2748        | CakSNP2748     | <i>Kabuli</i>    | Ca_Kabuli_Chr02              | 26092913                       | (C/A)       |
| 2749        | CakSNP2749     | <i>Kabuli</i>    | Ca_Kabuli_Chr02              | 26092928                       | (T/G)       |
| 2750        | CakSNP2750     | <i>Kabuli</i>    | Ca_Kabuli_Chr02              | 26092991                       | (T/C)       |
| 2751        | CakSNP2751     | <i>Kabuli</i>    | Ca_Kabuli_Chr02              | 26121495                       | (A/C)       |
| 2752        | CakSNP2752     | <i>Kabuli</i>    | Ca_Kabuli_Chr02              | 26121491                       | (T/G)       |
| 2753        | CakSNP2753     | <i>Kabuli</i>    | Ca_Kabuli_Chr02              | 26417311                       | (T/A)       |
| 2754        | CakSNP2754     | <i>Kabuli</i>    | Ca_Kabuli_Chr02              | 26417281                       | (A/G)       |
| 2755        | CakSNP2755     | <i>Kabuli</i>    | Ca_Kabuli_Chr02              | 26417256                       | (T/C)       |
| 2756        | CakSNP2756     | <i>Kabuli</i>    | Ca_Kabuli_Chr02              | 26431061                       | (T/C)       |
| 2757        | CakSNP2757     | <i>Kabuli</i>    | Ca_Kabuli_Chr02              | 26431058                       | (G/C)       |
| 2758        | CakSNP2758     | <i>Kabuli</i>    | Ca_Kabuli_Chr02              | 26431052                       | (T/C)       |
| 2759        | CakSNP2759     | <i>Kabuli</i>    | Ca_Kabuli_Chr02              | 26461867                       | (C/G)       |
| 2760        | CakSNP2760     | <i>Kabuli</i>    | Ca_Kabuli_Chr02              | 26461986                       | (A/C)       |
| 2761        | CakSNP2761     | <i>Kabuli</i>    | Ca_Kabuli_Chr02              | 26461960                       | (T/A)       |
| 2762        | CakSNP2762     | <i>Kabuli</i>    | Ca_Kabuli_Chr02              | 26486049                       | (G/A)       |
| 2763        | CakSNP2763     | <i>Kabuli</i>    | Ca_Kabuli_Chr02              | 26486065                       | (C/T)       |
| 2764        | CakSNP2764     | <i>Kabuli</i>    | Ca_Kabuli_Chr02              | 26486109                       | (T/C)       |
| 2765        | CakSNP2765     | <i>Kabuli</i>    | Ca_Kabuli_Chr02              | 26502153                       | (T/C)       |
| 2766        | CakSNP2766     | <i>Kabuli</i>    | Ca_Kabuli_Chr02              | 26503262                       | (C/A)       |
| 2767        | CakSNP2767     | <i>Kabuli</i>    | Ca_Kabuli_Chr02              | 26567088                       | (T/C)       |
| 2768        | CakSNP2768     | <i>Kabuli</i>    | Ca_Kabuli_Chr02              | 26585842                       | (T/A)       |
| 2769        | CakSNP2769     | <i>Kabuli</i>    | Ca_Kabuli_Chr02              | 26601337                       | (C/A)       |
| 2770        | CakSNP2770     | <i>Kabuli</i>    | Ca_Kabuli_Chr02              | 26601331                       | (G/C)       |
| 2771        | CakSNP2771     | <i>Kabuli</i>    | Ca_Kabuli_Chr02              | 26706849                       | (A/G)       |
| 2772        | CakSNP2772     | <i>Kabuli</i>    | Ca_Kabuli_Chr02              | 27057582                       | (C/T)       |
| 2773        | CakSNP2773     | <i>Kabuli</i>    | Ca_Kabuli_Chr02              | 27063749                       | (C/A)       |

| <b>S.N.</b> | <b>SNP IDs</b> | <b>Cultivars</b> | <b>Chromosomes/scaffolds</b> | <b>Physical positions (bp)</b> | <b>SNPs</b> |
|-------------|----------------|------------------|------------------------------|--------------------------------|-------------|
| 2774        | CakSNP2774     | <i>Kabuli</i>    | Ca_Kabuli_Chr02              | 27134574                       | (A/G)       |
| 2775        | CakSNP2775     | <i>Kabuli</i>    | Ca_Kabuli_Chr02              | 27134560                       | (G/T)       |
| 2776        | CakSNP2776     | <i>Kabuli</i>    | Ca_Kabuli_Chr02              | 27182855                       | (T/C)       |
| 2777        | CakSNP2777     | <i>Kabuli</i>    | Ca_Kabuli_Chr02              | 27317272                       | (A/T)       |
| 2778        | CakSNP2778     | <i>Kabuli</i>    | Ca_Kabuli_Chr02              | 27374064                       | (A/T)       |
| 2779        | CakSNP2779     | <i>Kabuli</i>    | Ca_Kabuli_Chr02              | 27374094                       | (C/A)       |
| 2780        | CakSNP2780     | <i>Kabuli</i>    | Ca_Kabuli_Chr02              | 27377809                       | (T/G)       |
| 2781        | CakSNP2781     | <i>Kabuli</i>    | Ca_Kabuli_Chr02              | 27623258                       | (A/G)       |
| 2782        | CakSNP2782     | <i>Kabuli</i>    | Ca_Kabuli_Chr02              | 27703356                       | (G/A)       |
| 2783        | CakSNP2783     | <i>Kabuli</i>    | Ca_Kabuli_Chr02              | 27724425                       | (G/T)       |
| 2784        | CakSNP2784     | <i>Kabuli</i>    | Ca_Kabuli_Chr02              | 27757490                       | (T/C)       |
| 2785        | CakSNP2785     | <i>Kabuli</i>    | Ca_Kabuli_Chr02              | 27757824                       | (A/G)       |
| 2786        | CakSNP2786     | <i>Kabuli</i>    | Ca_Kabuli_Chr02              | 27757804                       | (A/G)       |
| 2787        | CakSNP2787     | <i>Kabuli</i>    | Ca_Kabuli_Chr02              | 27757795                       | (T/G)       |
| 2788        | CakSNP2788     | <i>Kabuli</i>    | Ca_Kabuli_Chr02              | 27758057                       | (C/T)       |
| 2789        | CakSNP2789     | <i>Kabuli</i>    | Ca_Kabuli_Chr02              | 27758058                       | (A/G)       |
| 2790        | CakSNP2790     | <i>Kabuli</i>    | Ca_Kabuli_Chr02              | 27758065                       | (C/G)       |
| 2791        | CakSNP2791     | <i>Kabuli</i>    | Ca_Kabuli_Chr02              | 27758093                       | (C/T)       |
| 2792        | CakSNP2792     | <i>Kabuli</i>    | Ca_Kabuli_Chr02              | 27766561                       | (T/A)       |
| 2793        | CakSNP2793     | <i>Kabuli</i>    | Ca_Kabuli_Chr02              | 27766623                       | (T/C)       |
| 2794        | CakSNP2794     | <i>Kabuli</i>    | Ca_Kabuli_Chr02              | 27766605                       | (A/C)       |
| 2795        | CakSNP2795     | <i>Kabuli</i>    | Ca_Kabuli_Chr02              | 27766594                       | (C/A)       |
| 2796        | CakSNP2796     | <i>Kabuli</i>    | Ca_Kabuli_Chr02              | 27807994                       | (A/G)       |
| 2797        | CakSNP2797     | <i>Kabuli</i>    | Ca_Kabuli_Chr02              | 27808070                       | (G/A)       |
| 2798        | CakSNP2798     | <i>Kabuli</i>    | Ca_Kabuli_Chr02              | 27824962                       | (G/A)       |
| 2799        | CakSNP2799     | <i>Kabuli</i>    | Ca_Kabuli_Chr02              | 27831340                       | (A/C)       |
| 2800        | CakSNP2800     | <i>Kabuli</i>    | Ca_Kabuli_Chr02              | 27831398                       | (A/G)       |
| 2801        | CakSNP2801     | <i>Kabuli</i>    | Ca_Kabuli_Chr02              | 27835871                       | (G/A)       |
| 2802        | CakSNP2802     | <i>Kabuli</i>    | Ca_Kabuli_Chr02              | 27835850                       | (G/A)       |
| 2803        | CakSNP2803     | <i>Kabuli</i>    | Ca_Kabuli_Chr02              | 27835843                       | (C/A)       |
| 2804        | CakSNP2804     | <i>Kabuli</i>    | Ca_Kabuli_Chr02              | 27835837                       | (C/T)       |
| 2805        | CakSNP2805     | <i>Kabuli</i>    | Ca_Kabuli_Chr02              | 27835832                       | (C/T)       |
| 2806        | CakSNP2806     | <i>Kabuli</i>    | Ca_Kabuli_Chr02              | 27847670                       | (A/C)       |
| 2807        | CakSNP2807     | <i>Kabuli</i>    | Ca_Kabuli_Chr02              | 28017163                       | (A/G)       |
| 2808        | CakSNP2808     | <i>Kabuli</i>    | Ca_Kabuli_Chr02              | 28018158                       | (T/C)       |
| 2809        | CakSNP2809     | <i>Kabuli</i>    | Ca_Kabuli_Chr02              | 28060867                       | (T/G)       |
| 2810        | CakSNP2810     | <i>Kabuli</i>    | Ca_Kabuli_Chr02              | 28060850                       | (A/G)       |
| 2811        | CakSNP2811     | <i>Kabuli</i>    | Ca_Kabuli_Chr02              | 28060879                       | (C/T)       |

| <b>S.N.</b> | <b>SNP IDs</b> | <b>Cultivars</b> | <b>Chromosomes/scaffolds</b> | <b>Physical positions (bp)</b> | <b>SNPs</b> |
|-------------|----------------|------------------|------------------------------|--------------------------------|-------------|
| 2812        | CakSNP2812     | <i>Kabuli</i>    | Ca_Kabuli_Chr02              | 28060896                       | (T/C)       |
| 2813        | CakSNP2813     | <i>Kabuli</i>    | Ca_Kabuli_Chr02              | 28060921                       | (C/T)       |
| 2814        | CakSNP2814     | <i>Kabuli</i>    | Ca_Kabuli_Chr02              | 28060922                       | (A/G)       |
| 2815        | CakSNP2815     | <i>Kabuli</i>    | Ca_Kabuli_Chr02              | 28060928                       | (C/T)       |
| 2816        | CakSNP2816     | <i>Kabuli</i>    | Ca_Kabuli_Chr02              | 28060930                       | (T/G)       |
| 2817        | CakSNP2817     | <i>Kabuli</i>    | Ca_Kabuli_Chr02              | 28060940                       | (C/T)       |
| 2818        | CakSNP2818     | <i>Kabuli</i>    | Ca_Kabuli_Chr02              | 28061049                       | (G/T)       |
| 2819        | CakSNP2819     | <i>Kabuli</i>    | Ca_Kabuli_Chr02              | 28076664                       | (C/T)       |
| 2820        | CakSNP2820     | <i>Kabuli</i>    | Ca_Kabuli_Chr02              | 28076834                       | (C/T)       |
| 2821        | CakSNP2821     | <i>Kabuli</i>    | Ca_Kabuli_Chr02              | 28076851                       | (G/A)       |
| 2822        | CakSNP2822     | <i>Kabuli</i>    | Ca_Kabuli_Chr02              | 28084910                       | (C/T)       |
| 2823        | CakSNP2823     | <i>Kabuli</i>    | Ca_Kabuli_Chr02              | 28084913                       | (C/A)       |
| 2824        | CakSNP2824     | <i>Kabuli</i>    | Ca_Kabuli_Chr02              | 28084953                       | (C/T)       |
| 2825        | CakSNP2825     | <i>Kabuli</i>    | Ca_Kabuli_Chr02              | 28229031                       | (G/A)       |
| 2826        | CakSNP2826     | <i>Kabuli</i>    | Ca_Kabuli_Chr02              | 28229046                       | (G/A)       |
| 2827        | CakSNP2827     | <i>Kabuli</i>    | Ca_Kabuli_Chr02              | 28324577                       | (T/A)       |
| 2828        | CakSNP2828     | <i>Kabuli</i>    | Ca_Kabuli_Chr02              | 28352533                       | (C/A)       |
| 2829        | CakSNP2829     | <i>Kabuli</i>    | Ca_Kabuli_Chr02              | 28407316                       | (T/C)       |
| 2830        | CakSNP2830     | <i>Kabuli</i>    | Ca_Kabuli_Chr02              | 28407324                       | (C/T)       |
| 2831        | CakSNP2831     | <i>Kabuli</i>    | Ca_Kabuli_Chr02              | 28534235                       | (T/C)       |
| 2832        | CakSNP2832     | <i>Kabuli</i>    | Ca_Kabuli_Chr02              | 28699149                       | (C/T)       |
| 2833        | CakSNP2833     | <i>Kabuli</i>    | Ca_Kabuli_Chr02              | 28699178                       | (T/C)       |
| 2834        | CakSNP2834     | <i>Kabuli</i>    | Ca_Kabuli_Chr02              | 28699185                       | (C/A)       |
| 2835        | CakSNP2835     | <i>Kabuli</i>    | Ca_Kabuli_Chr02              | 28699219                       | (T/G)       |
| 2836        | CakSNP2836     | <i>Kabuli</i>    | Ca_Kabuli_Chr02              | 28699229                       | (C/T)       |
| 2837        | CakSNP2837     | <i>Kabuli</i>    | Ca_Kabuli_Chr02              | 28699276                       | (T/C)       |
| 2838        | CakSNP2838     | <i>Kabuli</i>    | Ca_Kabuli_Chr02              | 28699383                       | (A/T)       |
| 2839        | CakSNP2839     | <i>Kabuli</i>    | Ca_Kabuli_Chr02              | 28699403                       | (C/T)       |
| 2840        | CakSNP2840     | <i>Kabuli</i>    | Ca_Kabuli_Chr02              | 28699414                       | (C/T)       |
| 2841        | CakSNP2841     | <i>Kabuli</i>    | Ca_Kabuli_Chr02              | 28699579                       | (A/C)       |
| 2842        | CakSNP2842     | <i>Kabuli</i>    | Ca_Kabuli_Chr02              | 28701724                       | (A/G)       |
| 2843        | CakSNP2843     | <i>Kabuli</i>    | Ca_Kabuli_Chr02              | 28741764                       | (T/C)       |
| 2844        | CakSNP2844     | <i>Kabuli</i>    | Ca_Kabuli_Chr02              | 28931402                       | (T/C)       |
| 2845        | CakSNP2845     | <i>Kabuli</i>    | Ca_Kabuli_Chr02              | 28931340                       | (T/C)       |
| 2846        | CakSNP2846     | <i>Kabuli</i>    | Ca_Kabuli_Chr02              | 28944712                       | (T/C)       |
| 2847        | CakSNP2847     | <i>Kabuli</i>    | Ca_Kabuli_Chr02              | 28944707                       | (A/C)       |
| 2848        | CakSNP2848     | <i>Kabuli</i>    | Ca_Kabuli_Chr02              | 28949900                       | (C/T)       |
| 2849        | CakSNP2849     | <i>Kabuli</i>    | Ca_Kabuli_Chr02              | 28949909                       | (G/A)       |

| <b>S.N.</b> | <b>SNP IDs</b> | <b>Cultivars</b> | <b>Chromosomes/scaffolds</b> | <b>Physical positions (bp)</b> | <b>SNPs</b> |
|-------------|----------------|------------------|------------------------------|--------------------------------|-------------|
| 2850        | CakSNP2850     | <i>Kabuli</i>    | Ca_Kabuli_Chr02              | 28949911                       | (A/C)       |
| 2851        | CakSNP2851     | <i>Kabuli</i>    | Ca_Kabuli_Chr02              | 28949919                       | (A/T)       |
| 2852        | CakSNP2852     | <i>Kabuli</i>    | Ca_Kabuli_Chr02              | 28949954                       | (T/A)       |
| 2853        | CakSNP2853     | <i>Kabuli</i>    | Ca_Kabuli_Chr02              | 28949948                       | (A/G)       |
| 2854        | CakSNP2854     | <i>Kabuli</i>    | Ca_Kabuli_Chr02              | 28970621                       | (A/G)       |
| 2855        | CakSNP2855     | <i>Kabuli</i>    | Ca_Kabuli_Chr02              | 28970618                       | (A/G)       |
| 2856        | CakSNP2856     | <i>Kabuli</i>    | Ca_Kabuli_Chr02              | 29103993                       | (T/C)       |
| 2857        | CakSNP2857     | <i>Kabuli</i>    | Ca_Kabuli_Chr02              | 29103970                       | (C/T)       |
| 2858        | CakSNP2858     | <i>Kabuli</i>    | Ca_Kabuli_Chr02              | 29122581                       | (G/A)       |
| 2859        | CakSNP2859     | <i>Kabuli</i>    | Ca_Kabuli_Chr02              | 29122589                       | (T/G)       |
| 2860        | CakSNP2860     | <i>Kabuli</i>    | Ca_Kabuli_Chr02              | 29592666                       | (G/A)       |
| 2861        | CakSNP2861     | <i>Kabuli</i>    | Ca_Kabuli_Chr02              | 29592694                       | (T/C)       |
| 2862        | CakSNP2862     | <i>Kabuli</i>    | Ca_Kabuli_Chr02              | 29601458                       | (C/T)       |
| 2863        | CakSNP2863     | <i>Kabuli</i>    | Ca_Kabuli_Chr02              | 29601463                       | (C/T)       |
| 2864        | CakSNP2864     | <i>Kabuli</i>    | Ca_Kabuli_Chr02              | 29614370                       | (C/T)       |
| 2865        | CakSNP2865     | <i>Kabuli</i>    | Ca_Kabuli_Chr02              | 29614375                       | (C/T)       |
| 2866        | CakSNP2866     | <i>Kabuli</i>    | Ca_Kabuli_Chr02              | 29693107                       | (A/G)       |
| 2867        | CakSNP2867     | <i>Kabuli</i>    | Ca_Kabuli_Chr02              | 29948356                       | (G/A)       |
| 2868        | CakSNP2868     | <i>Kabuli</i>    | Ca_Kabuli_Chr02              | 29960049                       | (G/A)       |
| 2869        | CakSNP2869     | <i>Kabuli</i>    | Ca_Kabuli_Chr02              | 29960054                       | (G/A)       |
| 2870        | CakSNP2870     | <i>Kabuli</i>    | Ca_Kabuli_Chr02              | 29960130                       | (C/T)       |
| 2871        | CakSNP2871     | <i>Kabuli</i>    | Ca_Kabuli_Chr02              | 30042255                       | (A/C)       |
| 2872        | CakSNP2872     | <i>Kabuli</i>    | Ca_Kabuli_Chr02              | 30042309                       | (T/G)       |
| 2873        | CakSNP2873     | <i>Kabuli</i>    | Ca_Kabuli_Chr02              | 30042302                       | (A/T)       |
| 2874        | CakSNP2874     | <i>Kabuli</i>    | Ca_Kabuli_Chr02              | 30042297                       | (C/T)       |
| 2875        | CakSNP2875     | <i>Kabuli</i>    | Ca_Kabuli_Chr02              | 30042267                       | (C/T)       |
| 2876        | CakSNP2876     | <i>Kabuli</i>    | Ca_Kabuli_Chr02              | 30045338                       | (C/G)       |
| 2877        | CakSNP2877     | <i>Kabuli</i>    | Ca_Kabuli_Chr02              | 30091313                       | (G/A)       |
| 2878        | CakSNP2878     | <i>Kabuli</i>    | Ca_Kabuli_Chr02              | 30091311                       | (C/T)       |
| 2879        | CakSNP2879     | <i>Kabuli</i>    | Ca_Kabuli_Chr02              | 30091308                       | (A/T)       |
| 2880        | CakSNP2880     | <i>Kabuli</i>    | Ca_Kabuli_Chr02              | 30091307                       | (C/T)       |
| 2881        | CakSNP2881     | <i>Kabuli</i>    | Ca_Kabuli_Chr02              | 30091295                       | (T/A)       |
| 2882        | CakSNP2882     | <i>Kabuli</i>    | Ca_Kabuli_Chr02              | 30091290                       | (T/C)       |
| 2883        | CakSNP2883     | <i>Kabuli</i>    | Ca_Kabuli_Chr02              | 30091286                       | (G/A)       |
| 2884        | CakSNP2884     | <i>Kabuli</i>    | Ca_Kabuli_Chr02              | 30091284                       | (A/C)       |
| 2885        | CakSNP2885     | <i>Kabuli</i>    | Ca_Kabuli_Chr02              | 30091280                       | (C/G)       |
| 2886        | CakSNP2886     | <i>Kabuli</i>    | Ca_Kabuli_Chr02              | 30133162                       | (G/A)       |
| 2887        | CakSNP2887     | <i>Kabuli</i>    | Ca_Kabuli_Chr02              | 30133189                       | (G/A)       |

| <b>S.N.</b> | <b>SNP IDs</b> | <b>Cultivars</b> | <b>Chromosomes/scaffolds</b> | <b>Physical positions (bp)</b> | <b>SNPs</b> |
|-------------|----------------|------------------|------------------------------|--------------------------------|-------------|
| 2888        | CakSNP2888     | <i>Kabuli</i>    | Ca_Kabuli_Chr02              | 30133215                       | (G/T)       |
| 2889        | CakSNP2889     | <i>Kabuli</i>    | Ca_Kabuli_Chr02              | 30133221                       | (A/T)       |
| 2890        | CakSNP2890     | <i>Kabuli</i>    | Ca_Kabuli_Chr02              | 30335160                       | (T/C)       |
| 2891        | CakSNP2891     | <i>Kabuli</i>    | Ca_Kabuli_Chr02              | 30335212                       | (T/A)       |
| 2892        | CakSNP2892     | <i>Kabuli</i>    | Ca_Kabuli_Chr02              | 30335194                       | (A/G)       |
| 2893        | CakSNP2893     | <i>Kabuli</i>    | Ca_Kabuli_Chr02              | 30363957                       | (C/A)       |
| 2894        | CakSNP2894     | <i>Kabuli</i>    | Ca_Kabuli_Chr02              | 30364073                       | (T/A)       |
| 2895        | CakSNP2895     | <i>Kabuli</i>    | Ca_Kabuli_Chr02              | 30364042                       | (A/G)       |
| 2896        | CakSNP2896     | <i>Kabuli</i>    | Ca_Kabuli_Chr02              | 30364025                       | (T/C)       |
| 2897        | CakSNP2897     | <i>Kabuli</i>    | Ca_Kabuli_Chr02              | 30370013                       | (C/A)       |
| 2898        | CakSNP2898     | <i>Kabuli</i>    | Ca_Kabuli_Chr02              | 30370003                       | (A/C)       |
| 2899        | CakSNP2899     | <i>Kabuli</i>    | Ca_Kabuli_Chr02              | 30370411                       | (T/C)       |
| 2900        | CakSNP2900     | <i>Kabuli</i>    | Ca_Kabuli_Chr02              | 30467552                       | (C/T)       |
| 2901        | CakSNP2901     | <i>Kabuli</i>    | Ca_Kabuli_Chr02              | 30467551                       | (A/T)       |
| 2902        | CakSNP2902     | <i>Kabuli</i>    | Ca_Kabuli_Chr02              | 30508454                       | (T/C)       |
| 2903        | CakSNP2903     | <i>Kabuli</i>    | Ca_Kabuli_Chr02              | 30530642                       | (A/T)       |
| 2904        | CakSNP2904     | <i>Kabuli</i>    | Ca_Kabuli_Chr02              | 30537667                       | (A/T)       |
| 2905        | CakSNP2905     | <i>Kabuli</i>    | Ca_Kabuli_Chr02              | 30537673                       | (A/G)       |
| 2906        | CakSNP2906     | <i>Kabuli</i>    | Ca_Kabuli_Chr02              | 30537687                       | (T/C)       |
| 2907        | CakSNP2907     | <i>Kabuli</i>    | Ca_Kabuli_Chr02              | 30537701                       | (T/A)       |
| 2908        | CakSNP2908     | <i>Kabuli</i>    | Ca_Kabuli_Chr02              | 30537953                       | (T/C)       |
| 2909        | CakSNP2909     | <i>Kabuli</i>    | Ca_Kabuli_Chr02              | 30614086                       | (C/T)       |
| 2910        | CakSNP2910     | <i>Kabuli</i>    | Ca_Kabuli_Chr02              | 30686920                       | (C/T)       |
| 2911        | CakSNP2911     | <i>Kabuli</i>    | Ca_Kabuli_Chr02              | 30702121                       | (T/C)       |
| 2912        | CakSNP2912     | <i>Kabuli</i>    | Ca_Kabuli_Chr02              | 30702090                       | (G/A)       |
| 2913        | CakSNP2913     | <i>Kabuli</i>    | Ca_Kabuli_Chr02              | 30867547                       | (G/A)       |
| 2914        | CakSNP2914     | <i>Kabuli</i>    | Ca_Kabuli_Chr02              | 30880148                       | (A/G)       |
| 2915        | CakSNP2915     | <i>Kabuli</i>    | Ca_Kabuli_Chr02              | 30880243                       | (G/C)       |
| 2916        | CakSNP2916     | <i>Kabuli</i>    | Ca_Kabuli_Chr02              | 30880246                       | (G/A)       |
| 2917        | CakSNP2917     | <i>Kabuli</i>    | Ca_Kabuli_Chr02              | 30880303                       | (T/A)       |
| 2918        | CakSNP2918     | <i>Kabuli</i>    | Ca_Kabuli_Chr02              | 30880302                       | (T/C)       |
| 2919        | CakSNP2919     | <i>Kabuli</i>    | Ca_Kabuli_Chr02              | 30880282                       | (A/G)       |
| 2920        | CakSNP2920     | <i>Kabuli</i>    | Ca_Kabuli_Chr02              | 30921092                       | (C/A)       |
| 2921        | CakSNP2921     | <i>Kabuli</i>    | Ca_Kabuli_Chr02              | 30921758                       | (C/T)       |
| 2922        | CakSNP2922     | <i>Kabuli</i>    | Ca_Kabuli_Chr02              | 30921888                       | (T/C)       |
| 2923        | CakSNP2923     | <i>Kabuli</i>    | Ca_Kabuli_Chr02              | 30921882                       | (C/G)       |
| 2924        | CakSNP2924     | <i>Kabuli</i>    | Ca_Kabuli_Chr02              | 30921917                       | (C/A)       |
| 2925        | CakSNP2925     | <i>Kabuli</i>    | Ca_Kabuli_Chr02              | 30921923                       | (A/G)       |

| <b>S.N.</b> | <b>SNP IDs</b> | <b>Cultivars</b> | <b>Chromosomes/scaffolds</b> | <b>Physical positions (bp)</b> | <b>SNPs</b> |
|-------------|----------------|------------------|------------------------------|--------------------------------|-------------|
| 2926        | CakSNP2926     | <i>Kabuli</i>    | Ca_Kabuli_Chr02              | 30954317                       | (G/A)       |
| 2927        | CakSNP2927     | <i>Kabuli</i>    | Ca_Kabuli_Chr02              | 30954305                       | (T/G)       |
| 2928        | CakSNP2928     | <i>Kabuli</i>    | Ca_Kabuli_Chr02              | 30977572                       | (A/G)       |
| 2929        | CakSNP2929     | <i>Kabuli</i>    | Ca_Kabuli_Chr02              | 30977528                       | (C/T)       |
| 2930        | CakSNP2930     | <i>Kabuli</i>    | Ca_Kabuli_Chr02              | 30977522                       | (A/T)       |
| 2931        | CakSNP2931     | <i>Kabuli</i>    | Ca_Kabuli_Chr02              | 30977508                       | (A/T)       |
| 2932        | CakSNP2932     | <i>Kabuli</i>    | Ca_Kabuli_Chr02              | 30997769                       | (T/A)       |
| 2933        | CakSNP2933     | <i>Kabuli</i>    | Ca_Kabuli_Chr02              | 30997780                       | (A/C)       |
| 2934        | CakSNP2934     | <i>Kabuli</i>    | Ca_Kabuli_Chr02              | 30997784                       | (T/A)       |
| 2935        | CakSNP2935     | <i>Kabuli</i>    | Ca_Kabuli_Chr02              | 31005847                       | (T/G)       |
| 2936        | CakSNP2936     | <i>Kabuli</i>    | Ca_Kabuli_Chr02              | 31005845                       | (C/T)       |
| 2937        | CakSNP2937     | <i>Kabuli</i>    | Ca_Kabuli_Chr02              | 31014295                       | (A/T)       |
| 2938        | CakSNP2938     | <i>Kabuli</i>    | Ca_Kabuli_Chr02              | 31055083                       | (C/T)       |
| 2939        | CakSNP2939     | <i>Kabuli</i>    | Ca_Kabuli_Chr02              | 31055007                       | (G/A)       |
| 2940        | CakSNP2940     | <i>Kabuli</i>    | Ca_Kabuli_Chr02              | 31088681                       | (G/T)       |
| 2941        | CakSNP2941     | <i>Kabuli</i>    | Ca_Kabuli_Chr02              | 31088676                       | (G/C)       |
| 2942        | CakSNP2942     | <i>Kabuli</i>    | Ca_Kabuli_Chr02              | 31088670                       | (C/T)       |
| 2943        | CakSNP2943     | <i>Kabuli</i>    | Ca_Kabuli_Chr02              | 31088648                       | (A/G)       |
| 2944        | CakSNP2944     | <i>Kabuli</i>    | Ca_Kabuli_Chr02              | 31088645                       | (A/C)       |
| 2945        | CakSNP2945     | <i>Kabuli</i>    | Ca_Kabuli_Chr02              | 31088778                       | (A/T)       |
| 2946        | CakSNP2946     | <i>Kabuli</i>    | Ca_Kabuli_Chr02              | 31088800                       | (T/C)       |
| 2947        | CakSNP2947     | <i>Kabuli</i>    | Ca_Kabuli_Chr02              | 31088882                       | (A/G)       |
| 2948        | CakSNP2948     | <i>Kabuli</i>    | Ca_Kabuli_Chr02              | 31109311                       | (G/T)       |
| 2949        | CakSNP2949     | <i>Kabuli</i>    | Ca_Kabuli_Chr02              | 31109358                       | (C/T)       |
| 2950        | CakSNP2950     | <i>Kabuli</i>    | Ca_Kabuli_Chr02              | 31109481                       | (G/A)       |
| 2951        | CakSNP2951     | <i>Kabuli</i>    | Ca_Kabuli_Chr02              | 31109441                       | (C/G)       |
| 2952        | CakSNP2952     | <i>Kabuli</i>    | Ca_Kabuli_Chr02              | 31109435                       | (G/A)       |
| 2953        | CakSNP2953     | <i>Kabuli</i>    | Ca_Kabuli_Chr02              | 31109427                       | (C/T)       |
| 2954        | CakSNP2954     | <i>Kabuli</i>    | Ca_Kabuli_Chr02              | 31141019                       | (G/A)       |
| 2955        | CakSNP2955     | <i>Kabuli</i>    | Ca_Kabuli_Chr02              | 31167603                       | (G/A)       |
| 2956        | CakSNP2956     | <i>Kabuli</i>    | Ca_Kabuli_Chr02              | 31167594                       | (A/G)       |
| 2957        | CakSNP2957     | <i>Kabuli</i>    | Ca_Kabuli_Chr02              | 31188355                       | (A/G)       |
| 2958        | CakSNP2958     | <i>Kabuli</i>    | Ca_Kabuli_Chr02              | 31201872                       | (T/C)       |
| 2959        | CakSNP2959     | <i>Kabuli</i>    | Ca_Kabuli_Chr02              | 31201859                       | (T/A)       |
| 2960        | CakSNP2960     | <i>Kabuli</i>    | Ca_Kabuli_Chr02              | 31201795                       | (A/G)       |
| 2961        | CakSNP2961     | <i>Kabuli</i>    | Ca_Kabuli_Chr02              | 31203154                       | (G/A)       |
| 2962        | CakSNP2962     | <i>Kabuli</i>    | Ca_Kabuli_Chr02              | 31205531                       | (C/T)       |
| 2963        | CakSNP2963     | <i>Kabuli</i>    | Ca_Kabuli_Chr02              | 31427861                       | (A/G)       |



| <b>S.N.</b> | <b>SNP IDs</b> | <b>Cultivars</b> | <b>Chromosomes/scaffolds</b> | <b>Physical positions (bp)</b> | <b>SNPs</b> |
|-------------|----------------|------------------|------------------------------|--------------------------------|-------------|
| 2964        | CakSNP2964     | <i>Kabuli</i>    | Ca_Kabuli_Chr02              | 31427902                       | (G/C)       |
| 2965        | CakSNP2965     | <i>Kabuli</i>    | Ca_Kabuli_Chr02              | 31427915                       | (A/G)       |
| 2966        | CakSNP2966     | <i>Kabuli</i>    | Ca_Kabuli_Chr02              | 31428024                       | (T/G)       |
| 2967        | CakSNP2967     | <i>Kabuli</i>    | Ca_Kabuli_Chr02              | 31428132                       | (G/A)       |
| 2968        | CakSNP2968     | <i>Kabuli</i>    | Ca_Kabuli_Chr02              | 31428405                       | (T/C)       |
| 2969        | CakSNP2969     | <i>Kabuli</i>    | Ca_Kabuli_Chr02              | 31428429                       | (T/G)       |
| 2970        | CakSNP2970     | <i>Kabuli</i>    | Ca_Kabuli_Chr02              | 31534265                       | (A/C)       |
| 2971        | CakSNP2971     | <i>Kabuli</i>    | Ca_Kabuli_Chr02              | 31534283                       | (A/G)       |
| 2972        | CakSNP2972     | <i>Kabuli</i>    | Ca_Kabuli_Chr02              | 31534455                       | (T/C)       |
| 2973        | CakSNP2973     | <i>Kabuli</i>    | Ca_Kabuli_Chr02              | 31686714                       | (C/T)       |
| 2974        | CakSNP2974     | <i>Kabuli</i>    | Ca_Kabuli_Chr02              | 31686716                       | (C/T)       |
| 2975        | CakSNP2975     | <i>Kabuli</i>    | Ca_Kabuli_Chr02              | 31686742                       | (A/C)       |
| 2976        | CakSNP2976     | <i>Kabuli</i>    | Ca_Kabuli_Chr02              | 31686751                       | (A/T)       |
| 2977        | CakSNP2977     | <i>Kabuli</i>    | Ca_Kabuli_Chr02              | 31686758                       | (C/A)       |
| 2978        | CakSNP2978     | <i>Kabuli</i>    | Ca_Kabuli_Chr02              | 31686761                       | (A/C)       |
| 2979        | CakSNP2979     | <i>Kabuli</i>    | Ca_Kabuli_Chr02              | 31686767                       | (C/T)       |
| 2980        | CakSNP2980     | <i>Kabuli</i>    | Ca_Kabuli_Chr02              | 31686779                       | (G/A)       |
| 2981        | CakSNP2981     | <i>Kabuli</i>    | Ca_Kabuli_Chr02              | 31686820                       | (T/C)       |
| 2982        | CakSNP2982     | <i>Kabuli</i>    | Ca_Kabuli_Chr02              | 31756777                       | (G/T)       |
| 2983        | CakSNP2983     | <i>Kabuli</i>    | Ca_Kabuli_Chr02              | 31847033                       | (A/C)       |
| 2984        | CakSNP2984     | <i>Kabuli</i>    | Ca_Kabuli_Chr02              | 31881918                       | (G/T)       |
| 2985        | CakSNP2985     | <i>Kabuli</i>    | Ca_Kabuli_Chr02              | 31885934                       | (A/G)       |
| 2986        | CakSNP2986     | <i>Kabuli</i>    | Ca_Kabuli_Chr02              | 31908694                       | (G/A)       |
| 2987        | CakSNP2987     | <i>Kabuli</i>    | Ca_Kabuli_Chr02              | 31908742                       | (G/A)       |
| 2988        | CakSNP2988     | <i>Kabuli</i>    | Ca_Kabuli_Chr02              | 31908803                       | (C/T)       |
| 2989        | CakSNP2989     | <i>Kabuli</i>    | Ca_Kabuli_Chr02              | 31908787                       | (G/A)       |
| 2990        | CakSNP2990     | <i>Kabuli</i>    | Ca_Kabuli_Chr02              | 31908845                       | (T/A)       |
| 2991        | CakSNP2991     | <i>Kabuli</i>    | Ca_Kabuli_Chr02              | 31908857                       | (C/T)       |
| 2992        | CakSNP2992     | <i>Kabuli</i>    | Ca_Kabuli_Chr02              | 31941463                       | (T/C)       |
| 2993        | CakSNP2993     | <i>Kabuli</i>    | Ca_Kabuli_Chr02              | 31941554                       | (A/T)       |
| 2994        | CakSNP2994     | <i>Kabuli</i>    | Ca_Kabuli_Chr02              | 31975269                       | (C/T)       |
| 2995        | CakSNP2995     | <i>Kabuli</i>    | Ca_Kabuli_Chr02              | 32003536                       | (G/T)       |
| 2996        | CakSNP2996     | <i>Kabuli</i>    | Ca_Kabuli_Chr02              | 32017361                       | (G/A)       |
| 2997        | CakSNP2997     | <i>Kabuli</i>    | Ca_Kabuli_Chr02              | 32049523                       | (C/A)       |
| 2998        | CakSNP2998     | <i>Kabuli</i>    | Ca_Kabuli_Chr02              | 32049525                       | (A/C)       |
| 2999        | CakSNP2999     | <i>Kabuli</i>    | Ca_Kabuli_Chr02              | 32058591                       | (T/C)       |
| 3000        | CakSNP3000     | <i>Kabuli</i>    | Ca_Kabuli_Chr02              | 32061053                       | (C/T)       |
| 3001        | CakSNP3001     | <i>Kabuli</i>    | Ca_Kabuli_Chr02              | 32061054                       | (T/C)       |

| <b>S.N.</b> | <b>SNP IDs</b> | <b>Cultivars</b> | <b>Chromosomes/scaffolds</b> | <b>Physical positions (bp)</b> | <b>SNPs</b> |
|-------------|----------------|------------------|------------------------------|--------------------------------|-------------|
| 3002        | CakSNP3002     | <i>Kabuli</i>    | Ca_Kabuli_Chr02              | 32062010                       | (A/C)       |
| 3003        | CakSNP3003     | <i>Kabuli</i>    | Ca_Kabuli_Chr02              | 32071107                       | (C/G)       |
| 3004        | CakSNP3004     | <i>Kabuli</i>    | Ca_Kabuli_Chr02              | 32080002                       | (T/C)       |
| 3005        | CakSNP3005     | <i>Kabuli</i>    | Ca_Kabuli_Chr02              | 32080007                       | (T/C)       |
| 3006        | CakSNP3006     | <i>Kabuli</i>    | Ca_Kabuli_Chr02              | 32080010                       | (G/C)       |
| 3007        | CakSNP3007     | <i>Kabuli</i>    | Ca_Kabuli_Chr02              | 32080016                       | (A/T)       |
| 3008        | CakSNP3008     | <i>Kabuli</i>    | Ca_Kabuli_Chr02              | 32080022                       | (C/A)       |
| 3009        | CakSNP3009     | <i>Kabuli</i>    | Ca_Kabuli_Chr02              | 32080037                       | (A/G)       |
| 3010        | CakSNP3010     | <i>Kabuli</i>    | Ca_Kabuli_Chr02              | 32096192                       | (A/C)       |
| 3011        | CakSNP3011     | <i>Kabuli</i>    | Ca_Kabuli_Chr02              | 32096186                       | (T/A)       |
| 3012        | CakSNP3012     | <i>Kabuli</i>    | Ca_Kabuli_Chr02              | 32096180                       | (C/G)       |
| 3013        | CakSNP3013     | <i>Kabuli</i>    | Ca_Kabuli_Chr02              | 32096177                       | (C/T)       |
| 3014        | CakSNP3014     | <i>Kabuli</i>    | Ca_Kabuli_Chr02              | 32096172                       | (C/T)       |
| 3015        | CakSNP3015     | <i>Kabuli</i>    | Ca_Kabuli_Chr02              | 32099757                       | (C/T)       |
| 3016        | CakSNP3016     | <i>Kabuli</i>    | Ca_Kabuli_Chr02              | 32099907                       | (T/C)       |
| 3017        | CakSNP3017     | <i>Kabuli</i>    | Ca_Kabuli_Chr02              | 32109805                       | (G/A)       |
| 3018        | CakSNP3018     | <i>Kabuli</i>    | Ca_Kabuli_Chr02              | 32109811                       | (G/A)       |
| 3019        | CakSNP3019     | <i>Kabuli</i>    | Ca_Kabuli_Chr02              | 32109813                       | (C/T)       |
| 3020        | CakSNP3020     | <i>Kabuli</i>    | Ca_Kabuli_Chr02              | 32109821                       | (G/A)       |
| 3021        | CakSNP3021     | <i>Kabuli</i>    | Ca_Kabuli_Chr02              | 32109827                       | (T/C)       |
| 3022        | CakSNP3022     | <i>Kabuli</i>    | Ca_Kabuli_Chr02              | 32109859                       | (A/C)       |
| 3023        | CakSNP3023     | <i>Kabuli</i>    | Ca_Kabuli_Chr02              | 32109904                       | (T/A)       |
| 3024        | CakSNP3024     | <i>Kabuli</i>    | Ca_Kabuli_Chr02              | 32109895                       | (A/G)       |
| 3025        | CakSNP3025     | <i>Kabuli</i>    | Ca_Kabuli_Chr02              | 32109892                       | (T/A)       |
| 3026        | CakSNP3026     | <i>Kabuli</i>    | Ca_Kabuli_Chr02              | 32119094                       | (A/T)       |
| 3027        | CakSNP3027     | <i>Kabuli</i>    | Ca_Kabuli_Chr02              | 32119268                       | (T/A)       |
| 3028        | CakSNP3028     | <i>Kabuli</i>    | Ca_Kabuli_Chr02              | 32119274                       | (T/C)       |
| 3029        | CakSNP3029     | <i>Kabuli</i>    | Ca_Kabuli_Chr02              | 32119331                       | (A/T)       |
| 3030        | CakSNP3030     | <i>Kabuli</i>    | Ca_Kabuli_Chr02              | 32129272                       | (T/C)       |
| 3031        | CakSNP3031     | <i>Kabuli</i>    | Ca_Kabuli_Chr02              | 32129395                       | (C/G)       |
| 3032        | CakSNP3032     | <i>Kabuli</i>    | Ca_Kabuli_Chr02              | 32140939                       | (A/T)       |
| 3033        | CakSNP3033     | <i>Kabuli</i>    | Ca_Kabuli_Chr02              | 32140948                       | (A/C)       |
| 3034        | CakSNP3034     | <i>Kabuli</i>    | Ca_Kabuli_Chr02              | 32140987                       | (A/G)       |
| 3035        | CakSNP3035     | <i>Kabuli</i>    | Ca_Kabuli_Chr02              | 32141047                       | (A/G)       |
| 3036        | CakSNP3036     | <i>Kabuli</i>    | Ca_Kabuli_Chr02              | 32141038                       | (T/C)       |
| 3037        | CakSNP3037     | <i>Kabuli</i>    | Ca_Kabuli_Chr02              | 32141019                       | (G/A)       |
| 3038        | CakSNP3038     | <i>Kabuli</i>    | Ca_Kabuli_Chr02              | 32141013                       | (G/C)       |
| 3039        | CakSNP3039     | <i>Kabuli</i>    | Ca_Kabuli_Chr02              | 32141002                       | (A/T)       |

| <b>S.N.</b> | <b>SNP IDs</b> | <b>Cultivars</b> | <b>Chromosomes/scaffolds</b> | <b>Physical positions (bp)</b> | <b>SNPs</b> |
|-------------|----------------|------------------|------------------------------|--------------------------------|-------------|
| 3040        | CakSNP3040     | <i>Kabuli</i>    | Ca_Kabuli_Chr02              | 32140998                       | (G/T)       |
| 3041        | CakSNP3041     | <i>Kabuli</i>    | Ca_Kabuli_Chr02              | 32140990                       | (G/A)       |
| 3042        | CakSNP3042     | <i>Kabuli</i>    | Ca_Kabuli_Chr02              | 32203032                       | (A/G)       |
| 3043        | CakSNP3043     | <i>Kabuli</i>    | Ca_Kabuli_Chr02              | 32203036                       | (A/T)       |
| 3044        | CakSNP3044     | <i>Kabuli</i>    | Ca_Kabuli_Chr02              | 32242818                       | (T/G)       |
| 3045        | CakSNP3045     | <i>Kabuli</i>    | Ca_Kabuli_Chr02              | 32348054                       | (T/A)       |
| 3046        | CakSNP3046     | <i>Kabuli</i>    | Ca_Kabuli_Chr02              | 32348087                       | (A/C)       |
| 3047        | CakSNP3047     | <i>Kabuli</i>    | Ca_Kabuli_Chr02              | 32348119                       | (G/T)       |
| 3048        | CakSNP3048     | <i>Kabuli</i>    | Ca_Kabuli_Chr02              | 32348793                       | (G/A)       |
| 3049        | CakSNP3049     | <i>Kabuli</i>    | Ca_Kabuli_Chr02              | 32348870                       | (T/C)       |
| 3050        | CakSNP3050     | <i>Kabuli</i>    | Ca_Kabuli_Chr02              | 32411994                       | (G/T)       |
| 3051        | CakSNP3051     | <i>Kabuli</i>    | Ca_Kabuli_Chr02              | 32412000                       | (G/T)       |
| 3052        | CakSNP3052     | <i>Kabuli</i>    | Ca_Kabuli_Chr02              | 32481969                       | (C/T)       |
| 3053        | CakSNP3053     | <i>Kabuli</i>    | Ca_Kabuli_Chr02              | 32481983                       | (G/T)       |
| 3054        | CakSNP3054     | <i>Kabuli</i>    | Ca_Kabuli_Chr02              | 32484223                       | (C/T)       |
| 3055        | CakSNP3055     | <i>Kabuli</i>    | Ca_Kabuli_Chr02              | 32545320                       | (A/G)       |
| 3056        | CakSNP3056     | <i>Kabuli</i>    | Ca_Kabuli_Chr02              | 32545329                       | (T/C)       |
| 3057        | CakSNP3057     | <i>Kabuli</i>    | Ca_Kabuli_Chr02              | 32545351                       | (G/A)       |
| 3058        | CakSNP3058     | <i>Kabuli</i>    | Ca_Kabuli_Chr02              | 32556992                       | (T/A)       |
| 3059        | CakSNP3059     | <i>Kabuli</i>    | Ca_Kabuli_Chr02              | 32564427                       | (T/C)       |
| 3060        | CakSNP3060     | <i>Kabuli</i>    | Ca_Kabuli_Chr02              | 32564480                       | (G/A)       |
| 3061        | CakSNP3061     | <i>Kabuli</i>    | Ca_Kabuli_Chr02              | 32564770                       | (G/T)       |
| 3062        | CakSNP3062     | <i>Kabuli</i>    | Ca_Kabuli_Chr02              | 32564796                       | (A/T)       |
| 3063        | CakSNP3063     | <i>Kabuli</i>    | Ca_Kabuli_Chr02              | 32570394                       | (G/A)       |
| 3064        | CakSNP3064     | <i>Kabuli</i>    | Ca_Kabuli_Chr02              | 32570479                       | (T/G)       |
| 3065        | CakSNP3065     | <i>Kabuli</i>    | Ca_Kabuli_Chr02              | 32570429                       | (G/A)       |
| 3066        | CakSNP3066     | <i>Kabuli</i>    | Ca_Kabuli_Chr02              | 32570504                       | (G/C)       |
| 3067        | CakSNP3067     | <i>Kabuli</i>    | Ca_Kabuli_Chr02              | 32577274                       | (T/A)       |
| 3068        | CakSNP3068     | <i>Kabuli</i>    | Ca_Kabuli_Chr02              | 32577593                       | (A/G)       |
| 3069        | CakSNP3069     | <i>Kabuli</i>    | Ca_Kabuli_Chr02              | 32579849                       | (T/C)       |
| 3070        | CakSNP3070     | <i>Kabuli</i>    | Ca_Kabuli_Chr02              | 32579900                       | (C/G)       |
| 3071        | CakSNP3071     | <i>Kabuli</i>    | Ca_Kabuli_Chr02              | 32608900                       | (A/T)       |
| 3072        | CakSNP3072     | <i>Kabuli</i>    | Ca_Kabuli_Chr02              | 32611624                       | (C/T)       |
| 3073        | CakSNP3073     | <i>Kabuli</i>    | Ca_Kabuli_Chr02              | 32611609                       | (A/G)       |
| 3074        | CakSNP3074     | <i>Kabuli</i>    | Ca_Kabuli_Chr02              | 32611601                       | (G/T)       |
| 3075        | CakSNP3075     | <i>Kabuli</i>    | Ca_Kabuli_Chr02              | 32627727                       | (C/G)       |
| 3076        | CakSNP3076     | <i>Kabuli</i>    | Ca_Kabuli_Chr02              | 32629763                       | (A/G)       |
| 3077        | CakSNP3077     | <i>Kabuli</i>    | Ca_Kabuli_Chr02              | 32670054                       | (C/T)       |

| <b>S.N.</b> | <b>SNP IDs</b> | <b>Cultivars</b> | <b>Chromosomes/scaffolds</b> | <b>Physical positions (bp)</b> | <b>SNPs</b> |
|-------------|----------------|------------------|------------------------------|--------------------------------|-------------|
| 3078        | CakSNP3078     | <i>Kabuli</i>    | Ca_Kabuli_Chr02              | 32670099                       | (C/T)       |
| 3079        | CakSNP3079     | <i>Kabuli</i>    | Ca_Kabuli_Chr02              | 32670181                       | (T/G)       |
| 3080        | CakSNP3080     | <i>Kabuli</i>    | Ca_Kabuli_Chr02              | 32671354                       | (T/A)       |
| 3081        | CakSNP3081     | <i>Kabuli</i>    | Ca_Kabuli_Chr02              | 32781880                       | (A/G)       |
| 3082        | CakSNP3082     | <i>Kabuli</i>    | Ca_Kabuli_Chr02              | 32844754                       | (T/G)       |
| 3083        | CakSNP3083     | <i>Kabuli</i>    | Ca_Kabuli_Chr02              | 32844842                       | (C/G)       |
| 3084        | CakSNP3084     | <i>Kabuli</i>    | Ca_Kabuli_Chr02              | 32867125                       | (A/G)       |
| 3085        | CakSNP3085     | <i>Kabuli</i>    | Ca_Kabuli_Chr02              | 32934646                       | (C/T)       |
| 3086        | CakSNP3086     | <i>Kabuli</i>    | Ca_Kabuli_Chr02              | 32934633                       | (G/C)       |
| 3087        | CakSNP3087     | <i>Kabuli</i>    | Ca_Kabuli_Chr02              | 32936855                       | (A/G)       |
| 3088        | CakSNP3088     | <i>Kabuli</i>    | Ca_Kabuli_Chr02              | 32936908                       | (G/A)       |
| 3089        | CakSNP3089     | <i>Kabuli</i>    | Ca_Kabuli_Chr02              | 32957515                       | (A/G)       |
| 3090        | CakSNP3090     | <i>Kabuli</i>    | Ca_Kabuli_Chr02              | 32957523                       | (T/C)       |
| 3091        | CakSNP3091     | <i>Kabuli</i>    | Ca_Kabuli_Chr02              | 32957538                       | (A/C)       |
| 3092        | CakSNP3092     | <i>Kabuli</i>    | Ca_Kabuli_Chr02              | 32957572                       | (A/C)       |
| 3093        | CakSNP3093     | <i>Kabuli</i>    | Ca_Kabuli_Chr02              | 32957958                       | (A/C)       |
| 3094        | CakSNP3094     | <i>Kabuli</i>    | Ca_Kabuli_Chr02              | 32958034                       | (C/G)       |
| 3095        | CakSNP3095     | <i>Kabuli</i>    | Ca_Kabuli_Chr02              | 32989134                       | (G/T)       |
| 3096        | CakSNP3096     | <i>Kabuli</i>    | Ca_Kabuli_Chr02              | 32989205                       | (G/T)       |
| 3097        | CakSNP3097     | <i>Kabuli</i>    | Ca_Kabuli_Chr02              | 33083903                       | (T/A)       |
| 3098        | CakSNP3098     | <i>Kabuli</i>    | Ca_Kabuli_Chr02              | 33084095                       | (T/G)       |
| 3099        | CakSNP3099     | <i>Kabuli</i>    | Ca_Kabuli_Chr02              | 33084132                       | (T/A)       |
| 3100        | CakSNP3100     | <i>Kabuli</i>    | Ca_Kabuli_Chr02              | 33103318                       | (G/A)       |
| 3101        | CakSNP3101     | <i>Kabuli</i>    | Ca_Kabuli_Chr02              | 33103466                       | (G/A)       |
| 3102        | CakSNP3102     | <i>Kabuli</i>    | Ca_Kabuli_Chr02              | 33103750                       | (A/G)       |
| 3103        | CakSNP3103     | <i>Kabuli</i>    | Ca_Kabuli_Chr02              | 33103766                       | (G/A)       |
| 3104        | CakSNP3104     | <i>Kabuli</i>    | Ca_Kabuli_Chr02              | 33172936                       | (C/T)       |
| 3105        | CakSNP3105     | <i>Kabuli</i>    | Ca_Kabuli_Chr02              | 33172971                       | (T/G)       |
| 3106        | CakSNP3106     | <i>Kabuli</i>    | Ca_Kabuli_Chr02              | 33178391                       | (G/A)       |
| 3107        | CakSNP3107     | <i>Kabuli</i>    | Ca_Kabuli_Chr02              | 33178407                       | (C/T)       |
| 3108        | CakSNP3108     | <i>Kabuli</i>    | Ca_Kabuli_Chr02              | 33178419                       | (C/A)       |
| 3109        | CakSNP3109     | <i>Kabuli</i>    | Ca_Kabuli_Chr02              | 33178420                       | (A/C)       |
| 3110        | CakSNP3110     | <i>Kabuli</i>    | Ca_Kabuli_Chr02              | 33178506                       | (T/C)       |
| 3111        | CakSNP3111     | <i>Kabuli</i>    | Ca_Kabuli_Chr02              | 33184262                       | (T/C)       |
| 3112        | CakSNP3112     | <i>Kabuli</i>    | Ca_Kabuli_Chr02              | 33194198                       | (A/G)       |
| 3113        | CakSNP3113     | <i>Kabuli</i>    | Ca_Kabuli_Chr02              | 33204253                       | (C/T)       |
| 3114        | CakSNP3114     | <i>Kabuli</i>    | Ca_Kabuli_Chr02              | 33326392                       | (T/G)       |
| 3115        | CakSNP3115     | <i>Kabuli</i>    | Ca_Kabuli_Chr02              | 33326398                       | (C/T)       |

| <b>S.N.</b> | <b>SNP IDs</b> | <b>Cultivars</b> | <b>Chromosomes/scaffolds</b> | <b>Physical positions (bp)</b> | <b>SNPs</b> |
|-------------|----------------|------------------|------------------------------|--------------------------------|-------------|
| 3116        | CakSNP3116     | <i>Kabuli</i>    | Ca_Kabuli_Chr02              | 33326444                       | (G/A)       |
| 3117        | CakSNP3117     | <i>Kabuli</i>    | Ca_Kabuli_Chr02              | 33326522                       | (G/A)       |
| 3118        | CakSNP3118     | <i>Kabuli</i>    | Ca_Kabuli_Chr02              | 33326520                       | (T/C)       |
| 3119        | CakSNP3119     | <i>Kabuli</i>    | Ca_Kabuli_Chr02              | 33326516                       | (G/A)       |
| 3120        | CakSNP3120     | <i>Kabuli</i>    | Ca_Kabuli_Chr02              | 33326510                       | (C/G)       |
| 3121        | CakSNP3121     | <i>Kabuli</i>    | Ca_Kabuli_Chr02              | 33393209                       | (T/C)       |
| 3122        | CakSNP3122     | <i>Kabuli</i>    | Ca_Kabuli_Chr02              | 33398561                       | (C/T)       |
| 3123        | CakSNP3123     | <i>Kabuli</i>    | Ca_Kabuli_Chr02              | 33398550                       | (G/A)       |
| 3124        | CakSNP3124     | <i>Kabuli</i>    | Ca_Kabuli_Chr02              | 33398549                       | (T/C)       |
| 3125        | CakSNP3125     | <i>Kabuli</i>    | Ca_Kabuli_Chr02              | 33398527                       | (T/G)       |
| 3126        | CakSNP3126     | <i>Kabuli</i>    | Ca_Kabuli_Chr02              | 33399010                       | (C/T)       |
| 3127        | CakSNP3127     | <i>Kabuli</i>    | Ca_Kabuli_Chr02              | 33399019                       | (T/C)       |
| 3128        | CakSNP3128     | <i>Kabuli</i>    | Ca_Kabuli_Chr02              | 33399045                       | (A/C)       |
| 3129        | CakSNP3129     | <i>Kabuli</i>    | Ca_Kabuli_Chr02              | 33399098                       | (G/A)       |
| 3130        | CakSNP3130     | <i>Kabuli</i>    | Ca_Kabuli_Chr02              | 33399063                       | (C/T)       |
| 3131        | CakSNP3131     | <i>Kabuli</i>    | Ca_Kabuli_Chr02              | 33399405                       | (C/T)       |
| 3132        | CakSNP3132     | <i>Kabuli</i>    | Ca_Kabuli_Chr02              | 33399404                       | (C/A)       |
| 3133        | CakSNP3133     | <i>Kabuli</i>    | Ca_Kabuli_Chr02              | 33399397                       | (C/T)       |
| 3134        | CakSNP3134     | <i>Kabuli</i>    | Ca_Kabuli_Chr02              | 33399393                       | (C/A)       |
| 3135        | CakSNP3135     | <i>Kabuli</i>    | Ca_Kabuli_Chr02              | 33399381                       | (C/T)       |
| 3136        | CakSNP3136     | <i>Kabuli</i>    | Ca_Kabuli_Chr02              | 33399342                       | (A/C)       |
| 3137        | CakSNP3137     | <i>Kabuli</i>    | Ca_Kabuli_Chr02              | 33399465                       | (C/G)       |
| 3138        | CakSNP3138     | <i>Kabuli</i>    | Ca_Kabuli_Chr02              | 33399608                       | (C/A)       |
| 3139        | CakSNP3139     | <i>Kabuli</i>    | Ca_Kabuli_Chr02              | 33401608                       | (A/G)       |
| 3140        | CakSNP3140     | <i>Kabuli</i>    | Ca_Kabuli_Chr02              | 33490058                       | (C/A)       |
| 3141        | CakSNP3141     | <i>Kabuli</i>    | Ca_Kabuli_Chr02              | 33489989                       | (T/C)       |
| 3142        | CakSNP3142     | <i>Kabuli</i>    | Ca_Kabuli_Chr02              | 33575286                       | (A/C)       |
| 3143        | CakSNP3143     | <i>Kabuli</i>    | Ca_Kabuli_Chr02              | 33582948                       | (G/A)       |
| 3144        | CakSNP3144     | <i>Kabuli</i>    | Ca_Kabuli_Chr02              | 33582900                       | (G/A)       |
| 3145        | CakSNP3145     | <i>Kabuli</i>    | Ca_Kabuli_Chr02              | 33650447                       | (A/T)       |
| 3146        | CakSNP3146     | <i>Kabuli</i>    | Ca_Kabuli_Chr02              | 33651426                       | (G/A)       |
| 3147        | CakSNP3147     | <i>Kabuli</i>    | Ca_Kabuli_Chr02              | 33651408                       | (A/G)       |
| 3148        | CakSNP3148     | <i>Kabuli</i>    | Ca_Kabuli_Chr02              | 33661177                       | (C/T)       |
| 3149        | CakSNP3149     | <i>Kabuli</i>    | Ca_Kabuli_Chr02              | 33661316                       | (T/C)       |
| 3150        | CakSNP3150     | <i>Kabuli</i>    | Ca_Kabuli_Chr02              | 33686794                       | (G/A)       |
| 3151        | CakSNP3151     | <i>Kabuli</i>    | Ca_Kabuli_Chr02              | 33692368                       | (C/A)       |
| 3152        | CakSNP3152     | <i>Kabuli</i>    | Ca_Kabuli_Chr02              | 33713018                       | (G/A)       |
| 3153        | CakSNP3153     | <i>Kabuli</i>    | Ca_Kabuli_Chr02              | 33721515                       | (T/A)       |

| <b>S.N.</b> | <b>SNP IDs</b> | <b>Cultivars</b> | <b>Chromosomes/scaffolds</b> | <b>Physical positions (bp)</b> | <b>SNPs</b> |
|-------------|----------------|------------------|------------------------------|--------------------------------|-------------|
| 3154        | CakSNP3154     | <i>Kabuli</i>    | Ca_Kabuli_Chr02              | 33733893                       | (C/T)       |
| 3155        | CakSNP3155     | <i>Kabuli</i>    | Ca_Kabuli_Chr02              | 33745281                       | (A/G)       |
| 3156        | CakSNP3156     | <i>Kabuli</i>    | Ca_Kabuli_Chr02              | 33764634                       | (G/A)       |
| 3157        | CakSNP3157     | <i>Kabuli</i>    | Ca_Kabuli_Chr02              | 33783871                       | (C/T)       |
| 3158        | CakSNP3158     | <i>Kabuli</i>    | Ca_Kabuli_Chr02              | 33785203                       | (G/A)       |
| 3159        | CakSNP3159     | <i>Kabuli</i>    | Ca_Kabuli_Chr02              | 33786243                       | (G/A)       |
| 3160        | CakSNP3160     | <i>Kabuli</i>    | Ca_Kabuli_Chr02              | 33788913                       | (A/C)       |
| 3161        | CakSNP3161     | <i>Kabuli</i>    | Ca_Kabuli_Chr02              | 33798717                       | (T/C)       |
| 3162        | CakSNP3162     | <i>Kabuli</i>    | Ca_Kabuli_Chr02              | 33798748                       | (T/C)       |
| 3163        | CakSNP3163     | <i>Kabuli</i>    | Ca_Kabuli_Chr02              | 34152352                       | (T/C)       |
| 3164        | CakSNP3164     | <i>Kabuli</i>    | Ca_Kabuli_Chr02              | 34152384                       | (T/C)       |
| 3165        | CakSNP3165     | <i>Kabuli</i>    | Ca_Kabuli_Chr02              | 34152476                       | (C/T)       |
| 3166        | CakSNP3166     | <i>Kabuli</i>    | Ca_Kabuli_Chr02              | 34155090                       | (A/G)       |
| 3167        | CakSNP3167     | <i>Kabuli</i>    | Ca_Kabuli_Chr02              | 34155179                       | (A/G)       |
| 3168        | CakSNP3168     | <i>Kabuli</i>    | Ca_Kabuli_Chr02              | 34178534                       | (G/A)       |
| 3169        | CakSNP3169     | <i>Kabuli</i>    | Ca_Kabuli_Chr02              | 34203162                       | (T/C)       |
| 3170        | CakSNP3170     | <i>Kabuli</i>    | Ca_Kabuli_Chr02              | 34203444                       | (T/C)       |
| 3171        | CakSNP3171     | <i>Kabuli</i>    | Ca_Kabuli_Chr02              | 34222585                       | (G/A)       |
| 3172        | CakSNP3172     | <i>Kabuli</i>    | Ca_Kabuli_Chr02              | 34249987                       | (C/T)       |
| 3173        | CakSNP3173     | <i>Kabuli</i>    | Ca_Kabuli_Chr02              | 34249953                       | (G/T)       |
| 3174        | CakSNP3174     | <i>Kabuli</i>    | Ca_Kabuli_Chr02              | 34250042                       | (C/T)       |
| 3175        | CakSNP3175     | <i>Kabuli</i>    | Ca_Kabuli_Chr02              | 34250266                       | (T/C)       |
| 3176        | CakSNP3176     | <i>Kabuli</i>    | Ca_Kabuli_Chr02              | 34266109                       | (A/G)       |
| 3177        | CakSNP3177     | <i>Kabuli</i>    | Ca_Kabuli_Chr02              | 34288116                       | (G/C)       |
| 3178        | CakSNP3178     | <i>Kabuli</i>    | Ca_Kabuli_Chr02              | 34299096                       | (G/A)       |
| 3179        | CakSNP3179     | <i>Kabuli</i>    | Ca_Kabuli_Chr02              | 34299075                       | (C/T)       |
| 3180        | CakSNP3180     | <i>Kabuli</i>    | Ca_Kabuli_Chr02              | 34299074                       | (A/C)       |
| 3181        | CakSNP3181     | <i>Kabuli</i>    | Ca_Kabuli_Chr02              | 34299063                       | (G/A)       |
| 3182        | CakSNP3182     | <i>Kabuli</i>    | Ca_Kabuli_Chr02              | 34299079                       | (A/C)       |
| 3183        | CakSNP3183     | <i>Kabuli</i>    | Ca_Kabuli_Chr02              | 34299846                       | (C/T)       |
| 3184        | CakSNP3184     | <i>Kabuli</i>    | Ca_Kabuli_Chr02              | 34300059                       | (A/G)       |
| 3185        | CakSNP3185     | <i>Kabuli</i>    | Ca_Kabuli_Chr02              | 34300057                       | (A/G)       |
| 3186        | CakSNP3186     | <i>Kabuli</i>    | Ca_Kabuli_Chr02              | 34343478                       | (C/G)       |
| 3187        | CakSNP3187     | <i>Kabuli</i>    | Ca_Kabuli_Chr02              | 34343705                       | (G/A)       |
| 3188        | CakSNP3188     | <i>Kabuli</i>    | Ca_Kabuli_Chr02              | 34346849                       | (C/T)       |
| 3189        | CakSNP3189     | <i>Kabuli</i>    | Ca_Kabuli_Chr02              | 34346842                       | (T/C)       |
| 3190        | CakSNP3190     | <i>Kabuli</i>    | Ca_Kabuli_Chr02              | 34372503                       | (T/G)       |
| 3191        | CakSNP3191     | <i>Kabuli</i>    | Ca_Kabuli_Chr02              | 34428978                       | (C/A)       |

| <b>S.N.</b> | <b>SNP IDs</b> | <b>Cultivars</b> | <b>Chromosomes/scaffolds</b> | <b>Physical positions (bp)</b> | <b>SNPs</b> |
|-------------|----------------|------------------|------------------------------|--------------------------------|-------------|
| 3192        | CakSNP3192     | <i>Kabuli</i>    | Ca_Kabuli_Chr02              | 34428979                       | (G/C)       |
| 3193        | CakSNP3193     | <i>Kabuli</i>    | Ca_Kabuli_Chr02              | 34429029                       | (G/T)       |
| 3194        | CakSNP3194     | <i>Kabuli</i>    | Ca_Kabuli_Chr02              | 34429030                       | (A/T)       |
| 3195        | CakSNP3195     | <i>Kabuli</i>    | Ca_Kabuli_Chr02              | 34551849                       | (A/C)       |
| 3196        | CakSNP3196     | <i>Kabuli</i>    | Ca_Kabuli_Chr02              | 34554164                       | (A/C)       |
| 3197        | CakSNP3197     | <i>Kabuli</i>    | Ca_Kabuli_Chr02              | 34601444                       | (C/A)       |
| 3198        | CakSNP3198     | <i>Kabuli</i>    | Ca_Kabuli_Chr02              | 34634128                       | (C/T)       |
| 3199        | CakSNP3199     | <i>Kabuli</i>    | Ca_Kabuli_Chr02              | 34638960                       | (A/C)       |
| 3200        | CakSNP3200     | <i>Kabuli</i>    | Ca_Kabuli_Chr02              | 34638955                       | (T/A)       |
| 3201        | CakSNP3201     | <i>Kabuli</i>    | Ca_Kabuli_Chr02              | 34734329                       | (G/A)       |
| 3202        | CakSNP3202     | <i>Kabuli</i>    | Ca_Kabuli_Chr02              | 34734379                       | (G/A)       |
| 3203        | CakSNP3203     | <i>Kabuli</i>    | Ca_Kabuli_Chr02              | 34734439                       | (G/A)       |
| 3204        | CakSNP3204     | <i>Kabuli</i>    | Ca_Kabuli_Chr02              | 34734472                       | (A/G)       |
| 3205        | CakSNP3205     | <i>Kabuli</i>    | Ca_Kabuli_Chr02              | 34736649                       | (T/C)       |
| 3206        | CakSNP3206     | <i>Kabuli</i>    | Ca_Kabuli_Chr02              | 34736658                       | (A/C)       |
| 3207        | CakSNP3207     | <i>Kabuli</i>    | Ca_Kabuli_Chr02              | 34736753                       | (C/T)       |
| 3208        | CakSNP3208     | <i>Kabuli</i>    | Ca_Kabuli_Chr02              | 34754363                       | (T/C)       |
| 3209        | CakSNP3209     | <i>Kabuli</i>    | Ca_Kabuli_Chr02              | 34754507                       | (C/T)       |
| 3210        | CakSNP3210     | <i>Kabuli</i>    | Ca_Kabuli_Chr02              | 34820075                       | (C/T)       |
| 3211        | CakSNP3211     | <i>Kabuli</i>    | Ca_Kabuli_Chr02              | 34830995                       | (A/G)       |
| 3212        | CakSNP3212     | <i>Kabuli</i>    | Ca_Kabuli_Chr02              | 34847681                       | (C/A)       |
| 3213        | CakSNP3213     | <i>Kabuli</i>    | Ca_Kabuli_Chr02              | 34848053                       | (G/A)       |
| 3214        | CakSNP3214     | <i>Kabuli</i>    | Ca_Kabuli_Chr02              | 34848480                       | (T/C)       |
| 3215        | CakSNP3215     | <i>Kabuli</i>    | Ca_Kabuli_Chr02              | 34862129                       | (G/T)       |
| 3216        | CakSNP3216     | <i>Kabuli</i>    | Ca_Kabuli_Chr02              | 34862135                       | (G/A)       |
| 3217        | CakSNP3217     | <i>Kabuli</i>    | Ca_Kabuli_Chr02              | 34862139                       | (A/G)       |
| 3218        | CakSNP3218     | <i>Kabuli</i>    | Ca_Kabuli_Chr02              | 34862150                       | (C/T)       |
| 3219        | CakSNP3219     | <i>Kabuli</i>    | Ca_Kabuli_Chr02              | 34862276                       | (C/G)       |
| 3220        | CakSNP3220     | <i>Kabuli</i>    | Ca_Kabuli_Chr02              | 34888414                       | (T/C)       |
| 3221        | CakSNP3221     | <i>Kabuli</i>    | Ca_Kabuli_Chr02              | 35013088                       | (G/C)       |
| 3222        | CakSNP3222     | <i>Kabuli</i>    | Ca_Kabuli_Chr02              | 35013084                       | (T/C)       |
| 3223        | CakSNP3223     | <i>Kabuli</i>    | Ca_Kabuli_Chr02              | 35052930                       | (C/A)       |
| 3224        | CakSNP3224     | <i>Kabuli</i>    | Ca_Kabuli_Chr02              | 35054244                       | (C/A)       |
| 3225        | CakSNP3225     | <i>Kabuli</i>    | Ca_Kabuli_Chr02              | 35059446                       | (A/T)       |
| 3226        | CakSNP3226     | <i>Kabuli</i>    | Ca_Kabuli_Chr02              | 35059434                       | (T/C)       |
| 3227        | CakSNP3227     | <i>Kabuli</i>    | Ca_Kabuli_Chr02              | 35059440                       | (A/C)       |
| 3228        | CakSNP3228     | <i>Kabuli</i>    | Ca_Kabuli_Chr02              | 35059451                       | (C/A)       |
| 3229        | CakSNP3229     | <i>Kabuli</i>    | Ca_Kabuli_Chr02              | 35060171                       | (A/G)       |

| <b>S.N.</b> | <b>SNP IDs</b> | <b>Cultivars</b> | <b>Chromosomes/scaffolds</b> | <b>Physical positions (bp)</b> | <b>SNPs</b> |
|-------------|----------------|------------------|------------------------------|--------------------------------|-------------|
| 3230        | CakSNP3230     | <i>Kabuli</i>    | Ca_Kabuli_Chr02              | 35060178                       | (A/T)       |
| 3231        | CakSNP3231     | <i>Kabuli</i>    | Ca_Kabuli_Chr02              | 35060228                       | (T/C)       |
| 3232        | CakSNP3232     | <i>Kabuli</i>    | Ca_Kabuli_Chr02              | 35060273                       | (G/A)       |
| 3233        | CakSNP3233     | <i>Kabuli</i>    | Ca_Kabuli_Chr02              | 35060264                       | (A/T)       |
| 3234        | CakSNP3234     | <i>Kabuli</i>    | Ca_Kabuli_Chr02              | 35066138                       | (G/A)       |
| 3235        | CakSNP3235     | <i>Kabuli</i>    | Ca_Kabuli_Chr02              | 35095010                       | (A/G)       |
| 3236        | CakSNP3236     | <i>Kabuli</i>    | Ca_Kabuli_Chr02              | 35096648                       | (A/T)       |
| 3237        | CakSNP3237     | <i>Kabuli</i>    | Ca_Kabuli_Chr02              | 35096649                       | (A/T)       |
| 3238        | CakSNP3238     | <i>Kabuli</i>    | Ca_Kabuli_Chr02              | 35120761                       | (G/A)       |
| 3239        | CakSNP3239     | <i>Kabuli</i>    | Ca_Kabuli_Chr02              | 35122109                       | (C/G)       |
| 3240        | CakSNP3240     | <i>Kabuli</i>    | Ca_Kabuli_Chr02              | 35154629                       | (C/A)       |
| 3241        | CakSNP3241     | <i>Kabuli</i>    | Ca_Kabuli_Chr02              | 35154603                       | (G/A)       |
| 3242        | CakSNP3242     | <i>Kabuli</i>    | Ca_Kabuli_Chr02              | 35171882                       | (T/G)       |
| 3243        | CakSNP3243     | <i>Kabuli</i>    | Ca_Kabuli_Chr02              | 35189471                       | (C/T)       |
| 3244        | CakSNP3244     | <i>Kabuli</i>    | Ca_Kabuli_Chr02              | 35195303                       | (T/C)       |
| 3245        | CakSNP3245     | <i>Kabuli</i>    | Ca_Kabuli_Chr02              | 35198352                       | (T/C)       |
| 3246        | CakSNP3246     | <i>Kabuli</i>    | Ca_Kabuli_Chr02              | 35209940                       | (C/T)       |
| 3247        | CakSNP3247     | <i>Kabuli</i>    | Ca_Kabuli_Chr02              | 35362587                       | (A/G)       |
| 3248        | CakSNP3248     | <i>Kabuli</i>    | Ca_Kabuli_Chr02              | 35362642                       | (A/G)       |
| 3249        | CakSNP3249     | <i>Kabuli</i>    | Ca_Kabuli_Chr02              | 35362657                       | (C/A)       |
| 3250        | CakSNP3250     | <i>Kabuli</i>    | Ca_Kabuli_Chr02              | 35362729                       | (A/G)       |
| 3251        | CakSNP3251     | <i>Kabuli</i>    | Ca_Kabuli_Chr02              | 35363488                       | (T/C)       |
| 3252        | CakSNP3252     | <i>Kabuli</i>    | Ca_Kabuli_Chr02              | 35363501                       | (T/C)       |
| 3253        | CakSNP3253     | <i>Kabuli</i>    | Ca_Kabuli_Chr02              | 35365029                       | (C/T)       |
| 3254        | CakSNP3254     | <i>Kabuli</i>    | Ca_Kabuli_Chr02              | 35367161                       | (G/A)       |
| 3255        | CakSNP3255     | <i>Kabuli</i>    | Ca_Kabuli_Chr02              | 35413400                       | (T/A)       |
| 3256        | CakSNP3256     | <i>Kabuli</i>    | Ca_Kabuli_Chr02              | 35441184                       | (C/T)       |
| 3257        | CakSNP3257     | <i>Kabuli</i>    | Ca_Kabuli_Chr02              | 35441180                       | (A/G)       |
| 3258        | CakSNP3258     | <i>Kabuli</i>    | Ca_Kabuli_Chr02              | 35441174                       | (T/G)       |
| 3259        | CakSNP3259     | <i>Kabuli</i>    | Ca_Kabuli_Chr02              | 35447976                       | (A/G)       |
| 3260        | CakSNP3260     | <i>Kabuli</i>    | Ca_Kabuli_Chr02              | 35448018                       | (C/G)       |
| 3261        | CakSNP3261     | <i>Kabuli</i>    | Ca_Kabuli_Chr02              | 35448126                       | (T/A)       |
| 3262        | CakSNP3262     | <i>Kabuli</i>    | Ca_Kabuli_Chr02              | 35449653                       | (G/A)       |
| 3263        | CakSNP3263     | <i>Kabuli</i>    | Ca_Kabuli_Chr02              | 35473250                       | (C/T)       |
| 3264        | CakSNP3264     | <i>Kabuli</i>    | Ca_Kabuli_Chr02              | 35505791                       | (C/G)       |
| 3265        | CakSNP3265     | <i>Kabuli</i>    | Ca_Kabuli_Chr02              | 35505874                       | (T/G)       |
| 3266        | CakSNP3266     | <i>Kabuli</i>    | Ca_Kabuli_Chr02              | 35533246                       | (G/A)       |
| 3267        | CakSNP3267     | <i>Kabuli</i>    | Ca_Kabuli_Chr02              | 35593439                       | (T/C)       |



| <b>S.N.</b> | <b>SNP IDs</b> | <b>Cultivars</b> | <b>Chromosomes/scaffolds</b> | <b>Physical positions (bp)</b> | <b>SNPs</b> |
|-------------|----------------|------------------|------------------------------|--------------------------------|-------------|
| 3268        | CakSNP3268     | <i>Kabuli</i>    | Ca_Kabuli_Chr02              | 35593797                       | (G/T)       |
| 3269        | CakSNP3269     | <i>Kabuli</i>    | Ca_Kabuli_Chr02              | 35593824                       | (A/C)       |
| 3270        | CakSNP3270     | <i>Kabuli</i>    | Ca_Kabuli_Chr02              | 35593827                       | (A/G)       |
| 3271        | CakSNP3271     | <i>Kabuli</i>    | Ca_Kabuli_Chr02              | 35594018                       | (A/T)       |
| 3272        | CakSNP3272     | <i>Kabuli</i>    | Ca_Kabuli_Chr02              | 35594013                       | (C/T)       |
| 3273        | CakSNP3273     | <i>Kabuli</i>    | Ca_Kabuli_Chr02              | 35593985                       | (A/G)       |
| 3274        | CakSNP3274     | <i>Kabuli</i>    | Ca_Kabuli_Chr02              | 35593965                       | (C/T)       |
| 3275        | CakSNP3275     | <i>Kabuli</i>    | Ca_Kabuli_Chr02              | 35593956                       | (A/G)       |
| 3276        | CakSNP3276     | <i>Kabuli</i>    | Ca_Kabuli_Chr02              | 35601566                       | (T/C)       |
| 3277        | CakSNP3277     | <i>Kabuli</i>    | Ca_Kabuli_Chr02              | 35601571                       | (A/C)       |
| 3278        | CakSNP3278     | <i>Kabuli</i>    | Ca_Kabuli_Chr02              | 35601578                       | (C/T)       |
| 3279        | CakSNP3279     | <i>Kabuli</i>    | Ca_Kabuli_Chr02              | 35601605                       | (G/A)       |
| 3280        | CakSNP3280     | <i>Kabuli</i>    | Ca_Kabuli_Chr02              | 35601691                       | (A/G)       |
| 3281        | CakSNP3281     | <i>Kabuli</i>    | Ca_Kabuli_Chr02              | 35601657                       | (T/C)       |
| 3282        | CakSNP3282     | <i>Kabuli</i>    | Ca_Kabuli_Chr02              | 35601632                       | (G/T)       |
| 3283        | CakSNP3283     | <i>Kabuli</i>    | Ca_Kabuli_Chr02              | 35612587                       | (C/A)       |
| 3284        | CakSNP3284     | <i>Kabuli</i>    | Ca_Kabuli_Chr02              | 35612590                       | (G/A)       |
| 3285        | CakSNP3285     | <i>Kabuli</i>    | Ca_Kabuli_Chr02              | 35612644                       | (G/A)       |
| 3286        | CakSNP3286     | <i>Kabuli</i>    | Ca_Kabuli_Chr02              | 35612788                       | (G/A)       |
| 3287        | CakSNP3287     | <i>Kabuli</i>    | Ca_Kabuli_Chr02              | 35612895                       | (T/C)       |
| 3288        | CakSNP3288     | <i>Kabuli</i>    | Ca_Kabuli_Chr02              | 35612900                       | (C/T)       |
| 3289        | CakSNP3289     | <i>Kabuli</i>    | Ca_Kabuli_Chr02              | 35613016                       | (G/A)       |
| 3290        | CakSNP3290     | <i>Kabuli</i>    | Ca_Kabuli_Chr02              | 35613135                       | (T/C)       |
| 3291        | CakSNP3291     | <i>Kabuli</i>    | Ca_Kabuli_Chr02              | 35658426                       | (C/T)       |
| 3292        | CakSNP3292     | <i>Kabuli</i>    | Ca_Kabuli_Chr02              | 35658537                       | (T/C)       |
| 3293        | CakSNP3293     | <i>Kabuli</i>    | Ca_Kabuli_Chr02              | 35661053                       | (C/T)       |
| 3294        | CakSNP3294     | <i>Kabuli</i>    | Ca_Kabuli_Chr02              | 35670478                       | (A/G)       |
| 3295        | CakSNP3295     | <i>Kabuli</i>    | Ca_Kabuli_Chr02              | 35704018                       | (A/G)       |
| 3296        | CakSNP3296     | <i>Kabuli</i>    | Ca_Kabuli_Chr02              | 35704069                       | (G/A)       |
| 3297        | CakSNP3297     | <i>Kabuli</i>    | Ca_Kabuli_Chr02              | 35704228                       | (C/A)       |
| 3298        | CakSNP3298     | <i>Kabuli</i>    | Ca_Kabuli_Chr02              | 35704213                       | (A/G)       |
| 3299        | CakSNP3299     | <i>Kabuli</i>    | Ca_Kabuli_Chr02              | 35704204                       | (T/C)       |
| 3300        | CakSNP3300     | <i>Kabuli</i>    | Ca_Kabuli_Chr02              | 35704200                       | (T/C)       |
| 3301        | CakSNP3301     | <i>Kabuli</i>    | Ca_Kabuli_Chr02              | 35704180                       | (A/G)       |
| 3302        | CakSNP3302     | <i>Kabuli</i>    | Ca_Kabuli_Chr02              | 35704178                       | (G/A)       |
| 3303        | CakSNP3303     | <i>Kabuli</i>    | Ca_Kabuli_Chr02              | 35728285                       | (T/A)       |
| 3304        | CakSNP3304     | <i>Kabuli</i>    | Ca_Kabuli_Chr02              | 35754617                       | (G/T)       |
| 3305        | CakSNP3305     | <i>Kabuli</i>    | Ca_Kabuli_Chr02              | 35754557                       | (C/T)       |

| <b>S.N.</b> | <b>SNP IDs</b> | <b>Cultivars</b> | <b>Chromosomes/scaffolds</b> | <b>Physical positions (bp)</b> | <b>SNPs</b> |
|-------------|----------------|------------------|------------------------------|--------------------------------|-------------|
| 3306        | CakSNP3306     | <i>Kabuli</i>    | Ca_Kabuli_Chr02              | 35754680                       | (C/A)       |
| 3307        | CakSNP3307     | <i>Kabuli</i>    | Ca_Kabuli_Chr02              | 35754682                       | (A/G)       |
| 3308        | CakSNP3308     | <i>Kabuli</i>    | Ca_Kabuli_Chr02              | 35754806                       | (G/C)       |
| 3309        | CakSNP3309     | <i>Kabuli</i>    | Ca_Kabuli_Chr02              | 35754757                       | (G/C)       |
| 3310        | CakSNP3310     | <i>Kabuli</i>    | Ca_Kabuli_Chr02              | 35759932                       | (A/T)       |
| 3311        | CakSNP3311     | <i>Kabuli</i>    | Ca_Kabuli_Chr02              | 35759940                       | (T/C)       |
| 3312        | CakSNP3312     | <i>Kabuli</i>    | Ca_Kabuli_Chr02              | 35759981                       | (G/A)       |
| 3313        | CakSNP3313     | <i>Kabuli</i>    | Ca_Kabuli_Chr02              | 35760062                       | (G/C)       |
| 3314        | CakSNP3314     | <i>Kabuli</i>    | Ca_Kabuli_Chr02              | 35760073                       | (A/T)       |
| 3315        | CakSNP3315     | <i>Kabuli</i>    | Ca_Kabuli_Chr02              | 35760170                       | (A/G)       |
| 3316        | CakSNP3316     | <i>Kabuli</i>    | Ca_Kabuli_Chr02              | 35760155                       | (G/A)       |
| 3317        | CakSNP3317     | <i>Kabuli</i>    | Ca_Kabuli_Chr02              | 35770569                       | (A/G)       |
| 3318        | CakSNP3318     | <i>Kabuli</i>    | Ca_Kabuli_Chr02              | 35795446                       | (G/A)       |
| 3319        | CakSNP3319     | <i>Kabuli</i>    | Ca_Kabuli_Chr02              | 35795395                       | (A/G)       |
| 3320        | CakSNP3320     | <i>Kabuli</i>    | Ca_Kabuli_Chr02              | 35795494                       | (G/A)       |
| 3321        | CakSNP3321     | <i>Kabuli</i>    | Ca_Kabuli_Chr02              | 35795496                       | (G/T)       |
| 3322        | CakSNP3322     | <i>Kabuli</i>    | Ca_Kabuli_Chr02              | 35795497                       | (G/T)       |
| 3323        | CakSNP3323     | <i>Kabuli</i>    | Ca_Kabuli_Chr02              | 35795521                       | (T/C)       |
| 3324        | CakSNP3324     | <i>Kabuli</i>    | Ca_Kabuli_Chr02              | 35828553                       | (G/A)       |
| 3325        | CakSNP3325     | <i>Kabuli</i>    | Ca_Kabuli_Chr02              | 35829782                       | (A/G)       |
| 3326        | CakSNP3326     | <i>Kabuli</i>    | Ca_Kabuli_Chr02              | 35844790                       | (A/G)       |
| 3327        | CakSNP3327     | <i>Kabuli</i>    | Ca_Kabuli_Chr02              | 35844762                       | (A/G)       |
| 3328        | CakSNP3328     | <i>Kabuli</i>    | Ca_Kabuli_Chr02              | 35862852                       | (C/T)       |
| 3329        | CakSNP3329     | <i>Kabuli</i>    | Ca_Kabuli_Chr02              | 35862878                       | (T/G)       |
| 3330        | CakSNP3330     | <i>Kabuli</i>    | Ca_Kabuli_Chr02              | 35875666                       | (A/G)       |
| 3331        | CakSNP3331     | <i>Kabuli</i>    | Ca_Kabuli_Chr02              | 35875653                       | (C/T)       |
| 3332        | CakSNP3332     | <i>Kabuli</i>    | Ca_Kabuli_Chr02              | 35930699                       | (T/G)       |
| 3333        | CakSNP3333     | <i>Kabuli</i>    | Ca_Kabuli_Chr02              | 35993062                       | (C/T)       |
| 3334        | CakSNP3334     | <i>Kabuli</i>    | Ca_Kabuli_Chr02              | 35993082                       | (T/G)       |
| 3335        | CakSNP3335     | <i>Kabuli</i>    | Ca_Kabuli_Chr02              | 35993089                       | (C/T)       |
| 3336        | CakSNP3336     | <i>Kabuli</i>    | Ca_Kabuli_Chr02              | 35993092                       | (A/T)       |
| 3337        | CakSNP3337     | <i>Kabuli</i>    | Ca_Kabuli_Chr02              | 35993178                       | (G/A)       |
| 3338        | CakSNP3338     | <i>Kabuli</i>    | Ca_Kabuli_Chr02              | 36013809                       | (A/G)       |
| 3339        | CakSNP3339     | <i>Kabuli</i>    | Ca_Kabuli_Chr02              | 36039428                       | (C/T)       |
| 3340        | CakSNP3340     | <i>Kabuli</i>    | Ca_Kabuli_Chr02              | 36039377                       | (C/T)       |
| 3341        | CakSNP3341     | <i>Kabuli</i>    | Ca_Kabuli_Chr02              | 36039364                       | (G/T)       |
| 3342        | CakSNP3342     | <i>Kabuli</i>    | Ca_Kabuli_Chr02              | 36046593                       | (G/T)       |
| 3343        | CakSNP3343     | <i>Kabuli</i>    | Ca_Kabuli_Chr02              | 36046595                       | (T/G)       |

| <b>S.N.</b> | <b>SNP IDs</b> | <b>Cultivars</b> | <b>Chromosomes/scaffolds</b> | <b>Physical positions (bp)</b> | <b>SNPs</b> |
|-------------|----------------|------------------|------------------------------|--------------------------------|-------------|
| 3344        | CakSNP3344     | <i>Kabuli</i>    | Ca_Kabuli_Chr02              | 36046741                       | (G/A)       |
| 3345        | CakSNP3345     | <i>Kabuli</i>    | Ca_Kabuli_Chr02              | 36046720                       | (T/A)       |
| 3346        | CakSNP3346     | <i>Kabuli</i>    | Ca_Kabuli_Chr02              | 36046767                       | (T/A)       |
| 3347        | CakSNP3347     | <i>Kabuli</i>    | Ca_Kabuli_Chr02              | 36046799                       | (C/A)       |
| 3348        | CakSNP3348     | <i>Kabuli</i>    | Ca_Kabuli_Chr02              | 36046820                       | (T/A)       |
| 3349        | CakSNP3349     | <i>Kabuli</i>    | Ca_Kabuli_Chr02              | 36046844                       | (T/G)       |
| 3350        | CakSNP3350     | <i>Kabuli</i>    | Ca_Kabuli_Chr02              | 36069340                       | (T/C)       |
| 3351        | CakSNP3351     | <i>Kabuli</i>    | Ca_Kabuli_Chr02              | 36072247                       | (C/A)       |
| 3352        | CakSNP3352     | <i>Kabuli</i>    | Ca_Kabuli_Chr02              | 36074147                       | (T/C)       |
| 3353        | CakSNP3353     | <i>Kabuli</i>    | Ca_Kabuli_Chr02              | 36088577                       | (A/T)       |
| 3354        | CakSNP3354     | <i>Kabuli</i>    | Ca_Kabuli_Chr02              | 36088623                       | (C/T)       |
| 3355        | CakSNP3355     | <i>Kabuli</i>    | Ca_Kabuli_Chr02              | 36088676                       | (T/C)       |
| 3356        | CakSNP3356     | <i>Kabuli</i>    | Ca_Kabuli_Chr02              | 36088853                       | (G/A)       |
| 3357        | CakSNP3357     | <i>Kabuli</i>    | Ca_Kabuli_Chr02              | 36101358                       | (A/G)       |
| 3358        | CakSNP3358     | <i>Kabuli</i>    | Ca_Kabuli_Chr02              | 36101379                       | (A/G)       |
| 3359        | CakSNP3359     | <i>Kabuli</i>    | Ca_Kabuli_Chr02              | 36101421                       | (C/T)       |
| 3360        | CakSNP3360     | <i>Kabuli</i>    | Ca_Kabuli_Chr02              | 36117695                       | (T/A)       |
| 3361        | CakSNP3361     | <i>Kabuli</i>    | Ca_Kabuli_Chr02              | 36117647                       | (G/A)       |
| 3362        | CakSNP3362     | <i>Kabuli</i>    | Ca_Kabuli_Chr02              | 36253581                       | (C/T)       |
| 3363        | CakSNP3363     | <i>Kabuli</i>    | Ca_Kabuli_Chr02              | 36276791                       | (G/A)       |
| 3364        | CakSNP3364     | <i>Kabuli</i>    | Ca_Kabuli_Chr02              | 36323575                       | (G/T)       |
| 3365        | CakSNP3365     | <i>Kabuli</i>    | Ca_Kabuli_Chr02              | 36326361                       | (A/C)       |
| 3366        | CakSNP3366     | <i>Kabuli</i>    | Ca_Kabuli_Chr02              | 36335252                       | (A/C)       |
| 3367        | CakSNP3367     | <i>Kabuli</i>    | Ca_Kabuli_Chr02              | 36343900                       | (C/T)       |
| 3368        | CakSNP3368     | <i>Kabuli</i>    | Ca_Kabuli_Chr02              | 36343933                       | (T/C)       |
| 3369        | CakSNP3369     | <i>Kabuli</i>    | Ca_Kabuli_Chr02              | 36346336                       | (A/G)       |
| 3370        | CakSNP3370     | <i>Kabuli</i>    | Ca_Kabuli_Chr02              | 36375224                       | (A/G)       |
| 3371        | CakSNP3371     | <i>Kabuli</i>    | Ca_Kabuli_Chr02              | 36375638                       | (A/G)       |
| 3372        | CakSNP3372     | <i>Kabuli</i>    | Ca_Kabuli_Chr02              | 36387189                       | (G/C)       |
| 3373        | CakSNP3373     | <i>Kabuli</i>    | Ca_Kabuli_Chr02              | 36387245                       | (T/C)       |
| 3374        | CakSNP3374     | <i>Kabuli</i>    | Ca_Kabuli_Chr02              | 36389041                       | (G/A)       |
| 3375        | CakSNP3375     | <i>Kabuli</i>    | Ca_Kabuli_Chr02              | 36389096                       | (C/T)       |
| 3376        | CakSNP3376     | <i>Kabuli</i>    | Ca_Kabuli_Chr02              | 36403788                       | (A/G)       |
| 3377        | CakSNP3377     | <i>Kabuli</i>    | Ca_Kabuli_Chr02              | 36427841                       | (C/T)       |
| 3378        | CakSNP3378     | <i>Kabuli</i>    | Ca_Kabuli_Chr02              | 36429512                       | (T/C)       |
| 3379        | CakSNP3379     | <i>Kabuli</i>    | Ca_Kabuli_Chr02              | 36438939                       | (T/G)       |
| 3380        | CakSNP3380     | <i>Kabuli</i>    | Ca_Kabuli_Chr02              | 36453691                       | (A/G)       |
| 3381        | CakSNP3381     | <i>Kabuli</i>    | Ca_Kabuli_Chr02              | 36453685                       | (G/A)       |

| <b>S.N.</b> | <b>SNP IDs</b> | <b>Cultivars</b> | <b>Chromosomes/scaffolds</b> | <b>Physical positions (bp)</b> | <b>SNPs</b> |
|-------------|----------------|------------------|------------------------------|--------------------------------|-------------|
| 3382        | CakSNP3382     | <i>Kabuli</i>    | Ca_Kabuli_Chr02              | 36466837                       | (C/T)       |
| 3383        | CakSNP3383     | <i>Kabuli</i>    | Ca_Kabuli_Chr02              | 36466998                       | (A/G)       |
| 3384        | CakSNP3384     | <i>Kabuli</i>    | Ca_Kabuli_Chr02              | 36467100                       | (A/C)       |
| 3385        | CakSNP3385     | <i>Kabuli</i>    | Ca_Kabuli_Chr02              | 36468390                       | (A/G)       |
| 3386        | CakSNP3386     | <i>Kabuli</i>    | Ca_Kabuli_Chr02              | 36468505                       | (C/A)       |
| 3387        | CakSNP3387     | <i>Kabuli</i>    | Ca_Kabuli_Chr02              | 36469921                       | (A/G)       |
| 3388        | CakSNP3388     | <i>Kabuli</i>    | Ca_Kabuli_Chr02              | 36505316                       | (C/A)       |
| 3389        | CakSNP3389     | <i>Kabuli</i>    | Ca_Kabuli_Chr02              | 36521200                       | (T/C)       |
| 3390        | CakSNP3390     | <i>Kabuli</i>    | Ca_Kabuli_Chr02              | 36533821                       | (A/C)       |
| 3391        | CakSNP3391     | <i>Kabuli</i>    | Ca_Kabuli_Chr02              | 36533910                       | (G/A)       |
| 3392        | CakSNP3392     | <i>Kabuli</i>    | Ca_Kabuli_Chr02              | 36554430                       | (G/A)       |
| 3393        | CakSNP3393     | <i>Kabuli</i>    | Ca_Kabuli_Chr02              | 36609730                       | (T/A)       |
| 3394        | CakSNP3394     | <i>Kabuli</i>    | Ca_Kabuli_Chr02              | 36609743                       | (C/T)       |
| 3395        | CakSNP3395     | <i>Kabuli</i>    | Ca_Kabuli_Chr02              | 36609744                       | (G/C)       |
| 3396        | CakSNP3396     | <i>Kabuli</i>    | Ca_Kabuli_Chr02              | 36609858                       | (C/G)       |
| 3397        | CakSNP3397     | <i>Kabuli</i>    | Ca_Kabuli_Chr02              | 36609950                       | (C/T)       |
| 3398        | CakSNP3398     | <i>Kabuli</i>    | Ca_Kabuli_Chr02              | 36609968                       | (C/T)       |
| 3399        | CakSNP3399     | <i>Kabuli</i>    | Ca_Kabuli_Chr02              | 36634234                       | (T/C)       |
| 3400        | CakSNP3400     | <i>Kabuli</i>    | Ca_Kabuli_Chr02              | 36634297                       | (C/G)       |
| 3401        | CakSNP3401     | <i>Kabuli</i>    | Ca_Kabuli_Chr03              | 171409                         | (A/T)       |
| 3402        | CakSNP3402     | <i>Kabuli</i>    | Ca_Kabuli_Chr03              | 171468                         | (A/G)       |
| 3403        | CakSNP3403     | <i>Kabuli</i>    | Ca_Kabuli_Chr03              | 171574                         | (C/A)       |
| 3404        | CakSNP3404     | <i>Kabuli</i>    | Ca_Kabuli_Chr03              | 171576                         | (G/T)       |
| 3405        | CakSNP3405     | <i>Kabuli</i>    | Ca_Kabuli_Chr03              | 171579                         | (C/T)       |
| 3406        | CakSNP3406     | <i>Kabuli</i>    | Ca_Kabuli_Chr03              | 171675                         | (T/A)       |
| 3407        | CakSNP3407     | <i>Kabuli</i>    | Ca_Kabuli_Chr03              | 208233                         | (C/A)       |
| 3408        | CakSNP3408     | <i>Kabuli</i>    | Ca_Kabuli_Chr03              | 220564                         | (A/G)       |
| 3409        | CakSNP3409     | <i>Kabuli</i>    | Ca_Kabuli_Chr03              | 220568                         | (A/T)       |
| 3410        | CakSNP3410     | <i>Kabuli</i>    | Ca_Kabuli_Chr03              | 220572                         | (T/C)       |
| 3411        | CakSNP3411     | <i>Kabuli</i>    | Ca_Kabuli_Chr03              | 220573                         | (G/T)       |
| 3412        | CakSNP3412     | <i>Kabuli</i>    | Ca_Kabuli_Chr03              | 223943                         | (G/A)       |
| 3413        | CakSNP3413     | <i>Kabuli</i>    | Ca_Kabuli_Chr03              | 223976                         | (G/C)       |
| 3414        | CakSNP3414     | <i>Kabuli</i>    | Ca_Kabuli_Chr03              | 286425                         | (G/T)       |
| 3415        | CakSNP3415     | <i>Kabuli</i>    | Ca_Kabuli_Chr03              | 419715                         | (T/G)       |
| 3416        | CakSNP3416     | <i>Kabuli</i>    | Ca_Kabuli_Chr03              | 988477                         | (G/A)       |
| 3417        | CakSNP3417     | <i>Kabuli</i>    | Ca_Kabuli_Chr03              | 988471                         | (T/C)       |
| 3418        | CakSNP3418     | <i>Kabuli</i>    | Ca_Kabuli_Chr03              | 1499038                        | (G/A)       |
| 3419        | CakSNP3419     | <i>Kabuli</i>    | Ca_Kabuli_Chr03              | 1499006                        | (A/G)       |

| <b>S.N.</b> | <b>SNP IDs</b> | <b>Cultivars</b> | <b>Chromosomes/scaffolds</b> | <b>Physical positions (bp)</b> | <b>SNPs</b> |
|-------------|----------------|------------------|------------------------------|--------------------------------|-------------|
| 3420        | CakSNP3420     | <i>Kabuli</i>    | Ca_Kabuli_Chr03              | 1746388                        | (C/A)       |
| 3421        | CakSNP3421     | <i>Kabuli</i>    | Ca_Kabuli_Chr03              | 1746389                        | (A/G)       |
| 3422        | CakSNP3422     | <i>Kabuli</i>    | Ca_Kabuli_Chr03              | 1829412                        | (T/G)       |
| 3423        | CakSNP3423     | <i>Kabuli</i>    | Ca_Kabuli_Chr03              | 1829358                        | (T/C)       |
| 3424        | CakSNP3424     | <i>Kabuli</i>    | Ca_Kabuli_Chr03              | 1829352                        | (C/T)       |
| 3425        | CakSNP3425     | <i>Kabuli</i>    | Ca_Kabuli_Chr03              | 1831920                        | (T/G)       |
| 3426        | CakSNP3426     | <i>Kabuli</i>    | Ca_Kabuli_Chr03              | 1831866                        | (T/C)       |
| 3427        | CakSNP3427     | <i>Kabuli</i>    | Ca_Kabuli_Chr03              | 1831860                        | (C/T)       |
| 3428        | CakSNP3428     | <i>Kabuli</i>    | Ca_Kabuli_Chr03              | 1831931                        | (A/C)       |
| 3429        | CakSNP3429     | <i>Kabuli</i>    | Ca_Kabuli_Chr03              | 2097376                        | (T/G)       |
| 3430        | CakSNP3430     | <i>Kabuli</i>    | Ca_Kabuli_Chr03              | 2097413                        | (A/G)       |
| 3431        | CakSNP3431     | <i>Kabuli</i>    | Ca_Kabuli_Chr03              | 2391515                        | (T/G)       |
| 3432        | CakSNP3432     | <i>Kabuli</i>    | Ca_Kabuli_Chr03              | 2423760                        | (T/C)       |
| 3433        | CakSNP3433     | <i>Kabuli</i>    | Ca_Kabuli_Chr03              | 2708703                        | (C/T)       |
| 3434        | CakSNP3434     | <i>Kabuli</i>    | Ca_Kabuli_Chr03              | 2825546                        | (G/T)       |
| 3435        | CakSNP3435     | <i>Kabuli</i>    | Ca_Kabuli_Chr03              | 2927148                        | (T/A)       |
| 3436        | CakSNP3436     | <i>Kabuli</i>    | Ca_Kabuli_Chr03              | 2927150                        | (A/T)       |
| 3437        | CakSNP3437     | <i>Kabuli</i>    | Ca_Kabuli_Chr03              | 2931027                        | (G/C)       |
| 3438        | CakSNP3438     | <i>Kabuli</i>    | Ca_Kabuli_Chr03              | 2931046                        | (C/T)       |
| 3439        | CakSNP3439     | <i>Kabuli</i>    | Ca_Kabuli_Chr03              | 2975179                        | (T/C)       |
| 3440        | CakSNP3440     | <i>Kabuli</i>    | Ca_Kabuli_Chr03              | 3280478                        | (C/T)       |
| 3441        | CakSNP3441     | <i>Kabuli</i>    | Ca_Kabuli_Chr03              | 3280500                        | (C/T)       |
| 3442        | CakSNP3442     | <i>Kabuli</i>    | Ca_Kabuli_Chr03              | 3280530                        | (G/A)       |
| 3443        | CakSNP3443     | <i>Kabuli</i>    | Ca_Kabuli_Chr03              | 3280595                        | (G/A)       |
| 3444        | CakSNP3444     | <i>Kabuli</i>    | Ca_Kabuli_Chr03              | 3617555                        | (G/A)       |
| 3445        | CakSNP3445     | <i>Kabuli</i>    | Ca_Kabuli_Chr03              | 3701394                        | (A/T)       |
| 3446        | CakSNP3446     | <i>Kabuli</i>    | Ca_Kabuli_Chr03              | 3701396                        | (C/T)       |
| 3447        | CakSNP3447     | <i>Kabuli</i>    | Ca_Kabuli_Chr03              | 3701398                        | (A/T)       |
| 3448        | CakSNP3448     | <i>Kabuli</i>    | Ca_Kabuli_Chr03              | 3701401                        | (A/T)       |
| 3449        | CakSNP3449     | <i>Kabuli</i>    | Ca_Kabuli_Chr03              | 3701403                        | (A/T)       |
| 3450        | CakSNP3450     | <i>Kabuli</i>    | Ca_Kabuli_Chr03              | 3701405                        | (G/T)       |
| 3451        | CakSNP3451     | <i>Kabuli</i>    | Ca_Kabuli_Chr03              | 3701415                        | (C/T)       |
| 3452        | CakSNP3452     | <i>Kabuli</i>    | Ca_Kabuli_Chr03              | 3701422                        | (C/T)       |
| 3453        | CakSNP3453     | <i>Kabuli</i>    | Ca_Kabuli_Chr03              | 3701426                        | (T/C)       |
| 3454        | CakSNP3454     | <i>Kabuli</i>    | Ca_Kabuli_Chr03              | 3701435                        | (A/T)       |
| 3455        | CakSNP3455     | <i>Kabuli</i>    | Ca_Kabuli_Chr03              | 3701436                        | (C/T)       |
| 3456        | CakSNP3456     | <i>Kabuli</i>    | Ca_Kabuli_Chr03              | 3701437                        | (A/T)       |
| 3457        | CakSNP3457     | <i>Kabuli</i>    | Ca_Kabuli_Chr03              | 3701440                        | (G/T)       |

| <b>S.N.</b> | <b>SNP IDs</b> | <b>Cultivars</b> | <b>Chromosomes/scaffolds</b> | <b>Physical positions (bp)</b> | <b>SNPs</b> |
|-------------|----------------|------------------|------------------------------|--------------------------------|-------------|
| 3458        | CakSNP3458     | <i>Kabuli</i>    | Ca_Kabuli_Chr03              | 3701450                        | (C/T)       |
| 3459        | CakSNP3459     | <i>Kabuli</i>    | Ca_Kabuli_Chr03              | 3701375                        | (G/A)       |
| 3460        | CakSNP3460     | <i>Kabuli</i>    | Ca_Kabuli_Chr03              | 3701370                        | (G/A)       |
| 3461        | CakSNP3461     | <i>Kabuli</i>    | Ca_Kabuli_Chr03              | 3744908                        | (G/A)       |
| 3462        | CakSNP3462     | <i>Kabuli</i>    | Ca_Kabuli_Chr03              | 3764420                        | (T/A)       |
| 3463        | CakSNP3463     | <i>Kabuli</i>    | Ca_Kabuli_Chr03              | 3764508                        | (T/C)       |
| 3464        | CakSNP3464     | <i>Kabuli</i>    | Ca_Kabuli_Chr03              | 3764545                        | (C/T)       |
| 3465        | CakSNP3465     | <i>Kabuli</i>    | Ca_Kabuli_Chr03              | 4145743                        | (G/A)       |
| 3466        | CakSNP3466     | <i>Kabuli</i>    | Ca_Kabuli_Chr03              | 4178154                        | (C/T)       |
| 3467        | CakSNP3467     | <i>Kabuli</i>    | Ca_Kabuli_Chr03              | 4266739                        | (G/A)       |
| 3468        | CakSNP3468     | <i>Kabuli</i>    | Ca_Kabuli_Chr03              | 4266700                        | (T/G)       |
| 3469        | CakSNP3469     | <i>Kabuli</i>    | Ca_Kabuli_Chr03              | 4266691                        | (C/T)       |
| 3470        | CakSNP3470     | <i>Kabuli</i>    | Ca_Kabuli_Chr03              | 4266686                        | (C/T)       |
| 3471        | CakSNP3471     | <i>Kabuli</i>    | Ca_Kabuli_Chr03              | 4266668                        | (G/A)       |
| 3472        | CakSNP3472     | <i>Kabuli</i>    | Ca_Kabuli_Chr03              | 4555124                        | (G/A)       |
| 3473        | CakSNP3473     | <i>Kabuli</i>    | Ca_Kabuli_Chr03              | 4555142                        | (T/A)       |
| 3474        | CakSNP3474     | <i>Kabuli</i>    | Ca_Kabuli_Chr03              | 4555167                        | (C/G)       |
| 3475        | CakSNP3475     | <i>Kabuli</i>    | Ca_Kabuli_Chr03              | 4555177                        | (C/T)       |
| 3476        | CakSNP3476     | <i>Kabuli</i>    | Ca_Kabuli_Chr03              | 4596815                        | (C/T)       |
| 3477        | CakSNP3477     | <i>Kabuli</i>    | Ca_Kabuli_Chr03              | 4596782                        | (A/G)       |
| 3478        | CakSNP3478     | <i>Kabuli</i>    | Ca_Kabuli_Chr03              | 4604649                        | (A/G)       |
| 3479        | CakSNP3479     | <i>Kabuli</i>    | Ca_Kabuli_Chr03              | 4606129                        | (T/A)       |
| 3480        | CakSNP3480     | <i>Kabuli</i>    | Ca_Kabuli_Chr03              | 4606128                        | (A/G)       |
| 3481        | CakSNP3481     | <i>Kabuli</i>    | Ca_Kabuli_Chr03              | 4629742                        | (A/T)       |
| 3482        | CakSNP3482     | <i>Kabuli</i>    | Ca_Kabuli_Chr03              | 4629747                        | (A/C)       |
| 3483        | CakSNP3483     | <i>Kabuli</i>    | Ca_Kabuli_Chr03              | 4654906                        | (C/T)       |
| 3484        | CakSNP3484     | <i>Kabuli</i>    | Ca_Kabuli_Chr03              | 4654898                        | (G/T)       |
| 3485        | CakSNP3485     | <i>Kabuli</i>    | Ca_Kabuli_Chr03              | 4654896                        | (T/C)       |
| 3486        | CakSNP3486     | <i>Kabuli</i>    | Ca_Kabuli_Chr03              | 4823828                        | (T/C)       |
| 3487        | CakSNP3487     | <i>Kabuli</i>    | Ca_Kabuli_Chr03              | 5224781                        | (A/G)       |
| 3488        | CakSNP3488     | <i>Kabuli</i>    | Ca_Kabuli_Chr03              | 5225052                        | (A/G)       |
| 3489        | CakSNP3489     | <i>Kabuli</i>    | Ca_Kabuli_Chr03              | 5225063                        | (G/T)       |
| 3490        | CakSNP3490     | <i>Kabuli</i>    | Ca_Kabuli_Chr03              | 5225108                        | (T/G)       |
| 3491        | CakSNP3491     | <i>Kabuli</i>    | Ca_Kabuli_Chr03              | 5225079                        | (G/A)       |
| 3492        | CakSNP3492     | <i>Kabuli</i>    | Ca_Kabuli_Chr03              | 5415782                        | (G/A)       |
| 3493        | CakSNP3493     | <i>Kabuli</i>    | Ca_Kabuli_Chr03              | 5436267                        | (A/G)       |
| 3494        | CakSNP3494     | <i>Kabuli</i>    | Ca_Kabuli_Chr03              | 5436272                        | (T/C)       |
| 3495        | CakSNP3495     | <i>Kabuli</i>    | Ca_Kabuli_Chr03              | 5436277                        | (C/T)       |

| <b>S.N.</b> | <b>SNP IDs</b> | <b>Cultivars</b> | <b>Chromosomes/scaffolds</b> | <b>Physical positions (bp)</b> | <b>SNPs</b> |
|-------------|----------------|------------------|------------------------------|--------------------------------|-------------|
| 3496        | CakSNP3496     | <i>Kabuli</i>    | Ca_Kabuli_Chr03              | 5436288                        | (G/T)       |
| 3497        | CakSNP3497     | <i>Kabuli</i>    | Ca_Kabuli_Chr03              | 5436295                        | (G/A)       |
| 3498        | CakSNP3498     | <i>Kabuli</i>    | Ca_Kabuli_Chr03              | 5436296                        | (C/T)       |
| 3499        | CakSNP3499     | <i>Kabuli</i>    | Ca_Kabuli_Chr03              | 5436299                        | (A/C)       |
| 3500        | CakSNP3500     | <i>Kabuli</i>    | Ca_Kabuli_Chr03              | 5436331                        | (C/A)       |
| 3501        | CakSNP3501     | <i>Kabuli</i>    | Ca_Kabuli_Chr03              | 5514176                        | (A/G)       |
| 3502        | CakSNP3502     | <i>Kabuli</i>    | Ca_Kabuli_Chr03              | 5514287                        | (C/A)       |
| 3503        | CakSNP3503     | <i>Kabuli</i>    | Ca_Kabuli_Chr03              | 6169456                        | (G/T)       |
| 3504        | CakSNP3504     | <i>Kabuli</i>    | Ca_Kabuli_Chr03              | 6169539                        | (T/C)       |
| 3505        | CakSNP3505     | <i>Kabuli</i>    | Ca_Kabuli_Chr03              | 6169510                        | (A/C)       |
| 3506        | CakSNP3506     | <i>Kabuli</i>    | Ca_Kabuli_Chr03              | 6278104                        | (G/A)       |
| 3507        | CakSNP3507     | <i>Kabuli</i>    | Ca_Kabuli_Chr03              | 6467014                        | (G/A)       |
| 3508        | CakSNP3508     | <i>Kabuli</i>    | Ca_Kabuli_Chr03              | 6683646                        | (A/G)       |
| 3509        | CakSNP3509     | <i>Kabuli</i>    | Ca_Kabuli_Chr03              | 6683587                        | (T/A)       |
| 3510        | CakSNP3510     | <i>Kabuli</i>    | Ca_Kabuli_Chr03              | 6828181                        | (A/T)       |
| 3511        | CakSNP3511     | <i>Kabuli</i>    | Ca_Kabuli_Chr03              | 6840644                        | (C/T)       |
| 3512        | CakSNP3512     | <i>Kabuli</i>    | Ca_Kabuli_Chr03              | 6894987                        | (C/A)       |
| 3513        | CakSNP3513     | <i>Kabuli</i>    | Ca_Kabuli_Chr03              | 6895085                        | (T/C)       |
| 3514        | CakSNP3514     | <i>Kabuli</i>    | Ca_Kabuli_Chr03              | 6899667                        | (T/C)       |
| 3515        | CakSNP3515     | <i>Kabuli</i>    | Ca_Kabuli_Chr03              | 7013492                        | (G/A)       |
| 3516        | CakSNP3516     | <i>Kabuli</i>    | Ca_Kabuli_Chr03              | 7015213                        | (T/G)       |
| 3517        | CakSNP3517     | <i>Kabuli</i>    | Ca_Kabuli_Chr03              | 7024620                        | (G/A)       |
| 3518        | CakSNP3518     | <i>Kabuli</i>    | Ca_Kabuli_Chr03              | 7204053                        | (G/A)       |
| 3519        | CakSNP3519     | <i>Kabuli</i>    | Ca_Kabuli_Chr03              | 7204071                        | (T/C)       |
| 3520        | CakSNP3520     | <i>Kabuli</i>    | Ca_Kabuli_Chr03              | 7204087                        | (C/T)       |
| 3521        | CakSNP3521     | <i>Kabuli</i>    | Ca_Kabuli_Chr03              | 7204088                        | (G/C)       |
| 3522        | CakSNP3522     | <i>Kabuli</i>    | Ca_Kabuli_Chr03              | 7204098                        | (G/A)       |
| 3523        | CakSNP3523     | <i>Kabuli</i>    | Ca_Kabuli_Chr03              | 7204099                        | (C/T)       |
| 3524        | CakSNP3524     | <i>Kabuli</i>    | Ca_Kabuli_Chr03              | 7204111                        | (G/A)       |
| 3525        | CakSNP3525     | <i>Kabuli</i>    | Ca_Kabuli_Chr03              | 7204112                        | (G/A)       |
| 3526        | CakSNP3526     | <i>Kabuli</i>    | Ca_Kabuli_Chr03              | 7204133                        | (G/T)       |
| 3527        | CakSNP3527     | <i>Kabuli</i>    | Ca_Kabuli_Chr03              | 7226689                        | (T/C)       |
| 3528        | CakSNP3528     | <i>Kabuli</i>    | Ca_Kabuli_Chr03              | 7226661                        | (G/T)       |
| 3529        | CakSNP3529     | <i>Kabuli</i>    | Ca_Kabuli_Chr03              | 7226632                        | (G/T)       |
| 3530        | CakSNP3530     | <i>Kabuli</i>    | Ca_Kabuli_Chr03              | 7246049                        | (T/G)       |
| 3531        | CakSNP3531     | <i>Kabuli</i>    | Ca_Kabuli_Chr03              | 7420705                        | (G/A)       |
| 3532        | CakSNP3532     | <i>Kabuli</i>    | Ca_Kabuli_Chr03              | 7433747                        | (C/A)       |
| 3533        | CakSNP3533     | <i>Kabuli</i>    | Ca_Kabuli_Chr03              | 7461833                        | (A/G)       |

| <b>S.N.</b> | <b>SNP IDs</b> | <b>Cultivars</b> | <b>Chromosomes/scaffolds</b> | <b>Physical positions (bp)</b> | <b>SNPs</b> |
|-------------|----------------|------------------|------------------------------|--------------------------------|-------------|
| 3534        | CakSNP3534     | <i>Kabuli</i>    | Ca_Kabuli_Chr03              | 7482871                        | (C/T)       |
| 3535        | CakSNP3535     | <i>Kabuli</i>    | Ca_Kabuli_Chr03              | 7606843                        | (A/G)       |
| 3536        | CakSNP3536     | <i>Kabuli</i>    | Ca_Kabuli_Chr03              | 7606901                        | (T/C)       |
| 3537        | CakSNP3537     | <i>Kabuli</i>    | Ca_Kabuli_Chr03              | 7606905                        | (C/G)       |
| 3538        | CakSNP3538     | <i>Kabuli</i>    | Ca_Kabuli_Chr03              | 7608100                        | (A/G)       |
| 3539        | CakSNP3539     | <i>Kabuli</i>    | Ca_Kabuli_Chr03              | 7665123                        | (G/A)       |
| 3540        | CakSNP3540     | <i>Kabuli</i>    | Ca_Kabuli_Chr03              | 7665112                        | (C/T)       |
| 3541        | CakSNP3541     | <i>Kabuli</i>    | Ca_Kabuli_Chr03              | 7665100                        | (G/T)       |
| 3542        | CakSNP3542     | <i>Kabuli</i>    | Ca_Kabuli_Chr03              | 7665098                        | (C/T)       |
| 3543        | CakSNP3543     | <i>Kabuli</i>    | Ca_Kabuli_Chr03              | 7665090                        | (C/T)       |
| 3544        | CakSNP3544     | <i>Kabuli</i>    | Ca_Kabuli_Chr03              | 7665078                        | (G/A)       |
| 3545        | CakSNP3545     | <i>Kabuli</i>    | Ca_Kabuli_Chr03              | 7665075                        | (G/A)       |
| 3546        | CakSNP3546     | <i>Kabuli</i>    | Ca_Kabuli_Chr03              | 7665156                        | (G/A)       |
| 3547        | CakSNP3547     | <i>Kabuli</i>    | Ca_Kabuli_Chr03              | 7665149                        | (T/G)       |
| 3548        | CakSNP3548     | <i>Kabuli</i>    | Ca_Kabuli_Chr03              | 7665142                        | (G/A)       |
| 3549        | CakSNP3549     | <i>Kabuli</i>    | Ca_Kabuli_Chr03              | 7665140                        | (G/T)       |
| 3550        | CakSNP3550     | <i>Kabuli</i>    | Ca_Kabuli_Chr03              | 7665157                        | (C/T)       |
| 3551        | CakSNP3551     | <i>Kabuli</i>    | Ca_Kabuli_Chr03              | 7694198                        | (C/T)       |
| 3552        | CakSNP3552     | <i>Kabuli</i>    | Ca_Kabuli_Chr03              | 7694297                        | (T/C)       |
| 3553        | CakSNP3553     | <i>Kabuli</i>    | Ca_Kabuli_Chr03              | 8536213                        | (T/C)       |
| 3554        | CakSNP3554     | <i>Kabuli</i>    | Ca_Kabuli_Chr03              | 8536275                        | (C/T)       |
| 3555        | CakSNP3555     | <i>Kabuli</i>    | Ca_Kabuli_Chr03              | 8536295                        | (A/T)       |
| 3556        | CakSNP3556     | <i>Kabuli</i>    | Ca_Kabuli_Chr03              | 8536301                        | (G/T)       |
| 3557        | CakSNP3557     | <i>Kabuli</i>    | Ca_Kabuli_Chr03              | 8536425                        | (C/A)       |
| 3558        | CakSNP3558     | <i>Kabuli</i>    | Ca_Kabuli_Chr03              | 8536498                        | (T/A)       |
| 3559        | CakSNP3559     | <i>Kabuli</i>    | Ca_Kabuli_Chr03              | 8536559                        | (T/C)       |
| 3560        | CakSNP3560     | <i>Kabuli</i>    | Ca_Kabuli_Chr03              | 8668628                        | (A/C)       |
| 3561        | CakSNP3561     | <i>Kabuli</i>    | Ca_Kabuli_Chr03              | 8669004                        | (A/T)       |
| 3562        | CakSNP3562     | <i>Kabuli</i>    | Ca_Kabuli_Chr03              | 8669132                        | (T/A)       |
| 3563        | CakSNP3563     | <i>Kabuli</i>    | Ca_Kabuli_Chr03              | 8697186                        | (A/G)       |
| 3564        | CakSNP3564     | <i>Kabuli</i>    | Ca_Kabuli_Chr03              | 8712381                        | (A/C)       |
| 3565        | CakSNP3565     | <i>Kabuli</i>    | Ca_Kabuli_Chr03              | 8933037                        | (T/C)       |
| 3566        | CakSNP3566     | <i>Kabuli</i>    | Ca_Kabuli_Chr03              | 8933084                        | (G/A)       |
| 3567        | CakSNP3567     | <i>Kabuli</i>    | Ca_Kabuli_Chr03              | 8933086                        | (C/A)       |
| 3568        | CakSNP3568     | <i>Kabuli</i>    | Ca_Kabuli_Chr03              | 8933221                        | (T/A)       |
| 3569        | CakSNP3569     | <i>Kabuli</i>    | Ca_Kabuli_Chr03              | 8933183                        | (A/G)       |
| 3570        | CakSNP3570     | <i>Kabuli</i>    | Ca_Kabuli_Chr03              | 8933255                        | (A/T)       |
| 3571        | CakSNP3571     | <i>Kabuli</i>    | Ca_Kabuli_Chr03              | 8933266                        | (G/T)       |



| <b>S.N.</b> | <b>SNP IDs</b> | <b>Cultivars</b> | <b>Chromosomes/scaffolds</b> | <b>Physical positions (bp)</b> | <b>SNPs</b> |
|-------------|----------------|------------------|------------------------------|--------------------------------|-------------|
| 3572        | CakSNP3572     | <i>Kabuli</i>    | Ca_Kabuli_Chr03              | 8933409                        | (A/C)       |
| 3573        | CakSNP3573     | <i>Kabuli</i>    | Ca_Kabuli_Chr03              | 8933370                        | (A/G)       |
| 3574        | CakSNP3574     | <i>Kabuli</i>    | Ca_Kabuli_Chr03              | 8933355                        | (A/T)       |
| 3575        | CakSNP3575     | <i>Kabuli</i>    | Ca_Kabuli_Chr03              | 9221403                        | (G/A)       |
| 3576        | CakSNP3576     | <i>Kabuli</i>    | Ca_Kabuli_Chr03              | 9221528                        | (C/T)       |
| 3577        | CakSNP3577     | <i>Kabuli</i>    | Ca_Kabuli_Chr03              | 9221579                        | (G/C)       |
| 3578        | CakSNP3578     | <i>Kabuli</i>    | Ca_Kabuli_Chr03              | 9221580                        | (T/G)       |
| 3579        | CakSNP3579     | <i>Kabuli</i>    | Ca_Kabuli_Chr03              | 9223444                        | (G/C)       |
| 3580        | CakSNP3580     | <i>Kabuli</i>    | Ca_Kabuli_Chr03              | 9223875                        | (G/A)       |
| 3581        | CakSNP3581     | <i>Kabuli</i>    | Ca_Kabuli_Chr03              | 9224033                        | (C/A)       |
| 3582        | CakSNP3582     | <i>Kabuli</i>    | Ca_Kabuli_Chr03              | 9224011                        | (G/A)       |
| 3583        | CakSNP3583     | <i>Kabuli</i>    | Ca_Kabuli_Chr03              | 9296469                        | (T/G)       |
| 3584        | CakSNP3584     | <i>Kabuli</i>    | Ca_Kabuli_Chr03              | 9448525                        | (T/C)       |
| 3585        | CakSNP3585     | <i>Kabuli</i>    | Ca_Kabuli_Chr03              | 9577402                        | (G/A)       |
| 3586        | CakSNP3586     | <i>Kabuli</i>    | Ca_Kabuli_Chr03              | 9579805                        | (A/T)       |
| 3587        | CakSNP3587     | <i>Kabuli</i>    | Ca_Kabuli_Chr03              | 9579808                        | (C/T)       |
| 3588        | CakSNP3588     | <i>Kabuli</i>    | Ca_Kabuli_Chr03              | 9579811                        | (G/C)       |
| 3589        | CakSNP3589     | <i>Kabuli</i>    | Ca_Kabuli_Chr03              | 9579817                        | (G/A)       |
| 3590        | CakSNP3590     | <i>Kabuli</i>    | Ca_Kabuli_Chr03              | 9579818                        | (G/T)       |
| 3591        | CakSNP3591     | <i>Kabuli</i>    | Ca_Kabuli_Chr03              | 9579824                        | (A/G)       |
| 3592        | CakSNP3592     | <i>Kabuli</i>    | Ca_Kabuli_Chr03              | 9579830                        | (T/A)       |
| 3593        | CakSNP3593     | <i>Kabuli</i>    | Ca_Kabuli_Chr03              | 9579831                        | (C/G)       |
| 3594        | CakSNP3594     | <i>Kabuli</i>    | Ca_Kabuli_Chr03              | 9579839                        | (G/A)       |
| 3595        | CakSNP3595     | <i>Kabuli</i>    | Ca_Kabuli_Chr03              | 9894316                        | (C/T)       |
| 3596        | CakSNP3596     | <i>Kabuli</i>    | Ca_Kabuli_Chr03              | 9894310                        | (C/A)       |
| 3597        | CakSNP3597     | <i>Kabuli</i>    | Ca_Kabuli_Chr03              | 10039539                       | (T/A)       |
| 3598        | CakSNP3598     | <i>Kabuli</i>    | Ca_Kabuli_Chr03              | 10105733                       | (A/G)       |
| 3599        | CakSNP3599     | <i>Kabuli</i>    | Ca_Kabuli_Chr03              | 10142152                       | (C/A)       |
| 3600        | CakSNP3600     | <i>Kabuli</i>    | Ca_Kabuli_Chr03              | 10159836                       | (A/C)       |
| 3601        | CakSNP3601     | <i>Kabuli</i>    | Ca_Kabuli_Chr03              | 10159859                       | (G/A)       |
| 3602        | CakSNP3602     | <i>Kabuli</i>    | Ca_Kabuli_Chr03              | 10159941                       | (C/A)       |
| 3603        | CakSNP3603     | <i>Kabuli</i>    | Ca_Kabuli_Chr03              | 10159943                       | (G/A)       |
| 3604        | CakSNP3604     | <i>Kabuli</i>    | Ca_Kabuli_Chr03              | 10159944                       | (T/C)       |
| 3605        | CakSNP3605     | <i>Kabuli</i>    | Ca_Kabuli_Chr03              | 10186893                       | (G/C)       |
| 3606        | CakSNP3606     | <i>Kabuli</i>    | Ca_Kabuli_Chr03              | 10186861                       | (G/T)       |
| 3607        | CakSNP3607     | <i>Kabuli</i>    | Ca_Kabuli_Chr03              | 10186857                       | (A/G)       |
| 3608        | CakSNP3608     | <i>Kabuli</i>    | Ca_Kabuli_Chr03              | 10186880                       | (A/G)       |
| 3609        | CakSNP3609     | <i>Kabuli</i>    | Ca_Kabuli_Chr03              | 10186889                       | (G/A)       |

| <b>S.N.</b> | <b>SNP IDs</b> | <b>Cultivars</b> | <b>Chromosomes/scaffolds</b> | <b>Physical positions (bp)</b> | <b>SNPs</b> |
|-------------|----------------|------------------|------------------------------|--------------------------------|-------------|
| 3610        | CakSNP3610     | <i>Kabuli</i>    | Ca_Kabuli_Chr03              | 10186891                       | (C/G)       |
| 3611        | CakSNP3611     | <i>Kabuli</i>    | Ca_Kabuli_Chr03              | 10201361                       | (G/T)       |
| 3612        | CakSNP3612     | <i>Kabuli</i>    | Ca_Kabuli_Chr03              | 10722780                       | (G/T)       |
| 3613        | CakSNP3613     | <i>Kabuli</i>    | Ca_Kabuli_Chr03              | 10722849                       | (G/C)       |
| 3614        | CakSNP3614     | <i>Kabuli</i>    | Ca_Kabuli_Chr03              | 10722859                       | (G/A)       |
| 3615        | CakSNP3615     | <i>Kabuli</i>    | Ca_Kabuli_Chr03              | 11143751                       | (G/A)       |
| 3616        | CakSNP3616     | <i>Kabuli</i>    | Ca_Kabuli_Chr03              | 11143818                       | (G/A)       |
| 3617        | CakSNP3617     | <i>Kabuli</i>    | Ca_Kabuli_Chr03              | 11143816                       | (C/T)       |
| 3618        | CakSNP3618     | <i>Kabuli</i>    | Ca_Kabuli_Chr03              | 11376752                       | (C/A)       |
| 3619        | CakSNP3619     | <i>Kabuli</i>    | Ca_Kabuli_Chr03              | 11378141                       | (C/T)       |
| 3620        | CakSNP3620     | <i>Kabuli</i>    | Ca_Kabuli_Chr03              | 11378425                       | (G/T)       |
| 3621        | CakSNP3621     | <i>Kabuli</i>    | Ca_Kabuli_Chr03              | 11590767                       | (C/T)       |
| 3622        | CakSNP3622     | <i>Kabuli</i>    | Ca_Kabuli_Chr03              | 11590793                       | (C/T)       |
| 3623        | CakSNP3623     | <i>Kabuli</i>    | Ca_Kabuli_Chr03              | 11590817                       | (C/G)       |
| 3624        | CakSNP3624     | <i>Kabuli</i>    | Ca_Kabuli_Chr03              | 11590874                       | (A/G)       |
| 3625        | CakSNP3625     | <i>Kabuli</i>    | Ca_Kabuli_Chr03              | 11590860                       | (G/A)       |
| 3626        | CakSNP3626     | <i>Kabuli</i>    | Ca_Kabuli_Chr03              | 11590832                       | (G/A)       |
| 3627        | CakSNP3627     | <i>Kabuli</i>    | Ca_Kabuli_Chr03              | 11590814                       | (T/C)       |
| 3628        | CakSNP3628     | <i>Kabuli</i>    | Ca_Kabuli_Chr03              | 11610500                       | (A/G)       |
| 3629        | CakSNP3629     | <i>Kabuli</i>    | Ca_Kabuli_Chr03              | 11610494                       | (C/T)       |
| 3630        | CakSNP3630     | <i>Kabuli</i>    | Ca_Kabuli_Chr03              | 11610460                       | (A/G)       |
| 3631        | CakSNP3631     | <i>Kabuli</i>    | Ca_Kabuli_Chr03              | 11610441                       | (G/T)       |
| 3632        | CakSNP3632     | <i>Kabuli</i>    | Ca_Kabuli_Chr03              | 11610481                       | (C/T)       |
| 3633        | CakSNP3633     | <i>Kabuli</i>    | Ca_Kabuli_Chr03              | 11610451                       | (C/T)       |
| 3634        | CakSNP3634     | <i>Kabuli</i>    | Ca_Kabuli_Chr03              | 11678625                       | (G/A)       |
| 3635        | CakSNP3635     | <i>Kabuli</i>    | Ca_Kabuli_Chr03              | 11684552                       | (G/A)       |
| 3636        | CakSNP3636     | <i>Kabuli</i>    | Ca_Kabuli_Chr03              | 11709777                       | (G/T)       |
| 3637        | CakSNP3637     | <i>Kabuli</i>    | Ca_Kabuli_Chr03              | 11811685                       | (A/G)       |
| 3638        | CakSNP3638     | <i>Kabuli</i>    | Ca_Kabuli_Chr03              | 12051826                       | (A/C)       |
| 3639        | CakSNP3639     | <i>Kabuli</i>    | Ca_Kabuli_Chr03              | 12058576                       | (T/C)       |
| 3640        | CakSNP3640     | <i>Kabuli</i>    | Ca_Kabuli_Chr03              | 12058756                       | (A/G)       |
| 3641        | CakSNP3641     | <i>Kabuli</i>    | Ca_Kabuli_Chr03              | 12058748                       | (A/T)       |
| 3642        | CakSNP3642     | <i>Kabuli</i>    | Ca_Kabuli_Chr03              | 12067458                       | (A/C)       |
| 3643        | CakSNP3643     | <i>Kabuli</i>    | Ca_Kabuli_Chr03              | 12069092                       | (T/G)       |
| 3644        | CakSNP3644     | <i>Kabuli</i>    | Ca_Kabuli_Chr03              | 12095571                       | (T/G)       |
| 3645        | CakSNP3645     | <i>Kabuli</i>    | Ca_Kabuli_Chr03              | 12124099                       | (G/A)       |
| 3646        | CakSNP3646     | <i>Kabuli</i>    | Ca_Kabuli_Chr03              | 12394742                       | (G/A)       |
| 3647        | CakSNP3647     | <i>Kabuli</i>    | Ca_Kabuli_Chr03              | 12599496                       | (A/C)       |

| <b>S.N.</b> | <b>SNP IDs</b> | <b>Cultivars</b> | <b>Chromosomes/scaffolds</b> | <b>Physical positions (bp)</b> | <b>SNPs</b> |
|-------------|----------------|------------------|------------------------------|--------------------------------|-------------|
| 3648        | CakSNP3648     | <i>Kabuli</i>    | Ca_Kabuli_Chr03              | 12622503                       | (A/G)       |
| 3649        | CakSNP3649     | <i>Kabuli</i>    | Ca_Kabuli_Chr03              | 12622504                       | (G/T)       |
| 3650        | CakSNP3650     | <i>Kabuli</i>    | Ca_Kabuli_Chr03              | 12622518                       | (T/G)       |
| 3651        | CakSNP3651     | <i>Kabuli</i>    | Ca_Kabuli_Chr03              | 12622534                       | (C/T)       |
| 3652        | CakSNP3652     | <i>Kabuli</i>    | Ca_Kabuli_Chr03              | 12622550                       | (A/T)       |
| 3653        | CakSNP3653     | <i>Kabuli</i>    | Ca_Kabuli_Chr03              | 12622578                       | (G/A)       |
| 3654        | CakSNP3654     | <i>Kabuli</i>    | Ca_Kabuli_Chr03              | 12622567                       | (A/C)       |
| 3655        | CakSNP3655     | <i>Kabuli</i>    | Ca_Kabuli_Chr03              | 12622543                       | (G/A)       |
| 3656        | CakSNP3656     | <i>Kabuli</i>    | Ca_Kabuli_Chr03              | 12627120                       | (C/T)       |
| 3657        | CakSNP3657     | <i>Kabuli</i>    | Ca_Kabuli_Chr03              | 12627125                       | (T/C)       |
| 3658        | CakSNP3658     | <i>Kabuli</i>    | Ca_Kabuli_Chr03              | 12627131                       | (G/A)       |
| 3659        | CakSNP3659     | <i>Kabuli</i>    | Ca_Kabuli_Chr03              | 12627144                       | (G/A)       |
| 3660        | CakSNP3660     | <i>Kabuli</i>    | Ca_Kabuli_Chr03              | 12627165                       | (T/C)       |
| 3661        | CakSNP3661     | <i>Kabuli</i>    | Ca_Kabuli_Chr03              | 12627143                       | (T/C)       |
| 3662        | CakSNP3662     | <i>Kabuli</i>    | Ca_Kabuli_Chr03              | 12627164                       | (G/A)       |
| 3663        | CakSNP3663     | <i>Kabuli</i>    | Ca_Kabuli_Chr03              | 12627170                       | (C/G)       |
| 3664        | CakSNP3664     | <i>Kabuli</i>    | Ca_Kabuli_Chr03              | 12809390                       | (A/G)       |
| 3665        | CakSNP3665     | <i>Kabuli</i>    | Ca_Kabuli_Chr03              | 12809794                       | (T/C)       |
| 3666        | CakSNP3666     | <i>Kabuli</i>    | Ca_Kabuli_Chr03              | 12814631                       | (C/T)       |
| 3667        | CakSNP3667     | <i>Kabuli</i>    | Ca_Kabuli_Chr03              | 12814603                       | (T/C)       |
| 3668        | CakSNP3668     | <i>Kabuli</i>    | Ca_Kabuli_Chr03              | 12814601                       | (A/C)       |
| 3669        | CakSNP3669     | <i>Kabuli</i>    | Ca_Kabuli_Chr03              | 12814600                       | (A/G)       |
| 3670        | CakSNP3670     | <i>Kabuli</i>    | Ca_Kabuli_Chr03              | 12814599                       | (A/T)       |
| 3671        | CakSNP3671     | <i>Kabuli</i>    | Ca_Kabuli_Chr03              | 12814597                       | (T/A)       |
| 3672        | CakSNP3672     | <i>Kabuli</i>    | Ca_Kabuli_Chr03              | 12814571                       | (C/A)       |
| 3673        | CakSNP3673     | <i>Kabuli</i>    | Ca_Kabuli_Chr03              | 12814558                       | (A/G)       |
| 3674        | CakSNP3674     | <i>Kabuli</i>    | Ca_Kabuli_Chr03              | 12897820                       | (C/T)       |
| 3675        | CakSNP3675     | <i>Kabuli</i>    | Ca_Kabuli_Chr03              | 12897831                       | (C/A)       |
| 3676        | CakSNP3676     | <i>Kabuli</i>    | Ca_Kabuli_Chr03              | 12897839                       | (G/A)       |
| 3677        | CakSNP3677     | <i>Kabuli</i>    | Ca_Kabuli_Chr03              | 12897841                       | (C/A)       |
| 3678        | CakSNP3678     | <i>Kabuli</i>    | Ca_Kabuli_Chr03              | 12897876                       | (C/T)       |
| 3679        | CakSNP3679     | <i>Kabuli</i>    | Ca_Kabuli_Chr03              | 12897881                       | (C/T)       |
| 3680        | CakSNP3680     | <i>Kabuli</i>    | Ca_Kabuli_Chr03              | 12897882                       | (T/G)       |
| 3681        | CakSNP3681     | <i>Kabuli</i>    | Ca_Kabuli_Chr03              | 12897926                       | (A/C)       |
| 3682        | CakSNP3682     | <i>Kabuli</i>    | Ca_Kabuli_Chr03              | 12897906                       | (C/A)       |
| 3683        | CakSNP3683     | <i>Kabuli</i>    | Ca_Kabuli_Chr03              | 12897887                       | (T/C)       |
| 3684        | CakSNP3684     | <i>Kabuli</i>    | Ca_Kabuli_Chr03              | 12897884                       | (C/T)       |
| 3685        | CakSNP3685     | <i>Kabuli</i>    | Ca_Kabuli_Chr03              | 12897883                       | (G/T)       |

| <b>S.N.</b> | <b>SNP IDs</b> | <b>Cultivars</b> | <b>Chromosomes/scaffolds</b> | <b>Physical positions (bp)</b> | <b>SNPs</b> |
|-------------|----------------|------------------|------------------------------|--------------------------------|-------------|
| 3686        | CakSNP3686     | <i>Kabuli</i>    | Ca_Kabuli_Chr03              | 12897886                       | (G/A)       |
| 3687        | CakSNP3687     | <i>Kabuli</i>    | Ca_Kabuli_Chr03              | 13185541                       | (G/A)       |
| 3688        | CakSNP3688     | <i>Kabuli</i>    | Ca_Kabuli_Chr03              | 13185530                       | (C/T)       |
| 3689        | CakSNP3689     | <i>Kabuli</i>    | Ca_Kabuli_Chr03              | 13185496                       | (G/A)       |
| 3690        | CakSNP3690     | <i>Kabuli</i>    | Ca_Kabuli_Chr03              | 13185490                       | (G/A)       |
| 3691        | CakSNP3691     | <i>Kabuli</i>    | Ca_Kabuli_Chr03              | 13185493                       | (G/A)       |
| 3692        | CakSNP3692     | <i>Kabuli</i>    | Ca_Kabuli_Chr03              | 13185508                       | (C/T)       |
| 3693        | CakSNP3693     | <i>Kabuli</i>    | Ca_Kabuli_Chr03              | 13185516                       | (C/T)       |
| 3694        | CakSNP3694     | <i>Kabuli</i>    | Ca_Kabuli_Chr03              | 13185583                       | (T/C)       |
| 3695        | CakSNP3695     | <i>Kabuli</i>    | Ca_Kabuli_Chr03              | 13185581                       | (T/A)       |
| 3696        | CakSNP3696     | <i>Kabuli</i>    | Ca_Kabuli_Chr03              | 13185574                       | (G/A)       |
| 3697        | CakSNP3697     | <i>Kabuli</i>    | Ca_Kabuli_Chr03              | 13185560                       | (G/A)       |
| 3698        | CakSNP3698     | <i>Kabuli</i>    | Ca_Kabuli_Chr03              | 13185575                       | (C/T)       |
| 3699        | CakSNP3699     | <i>Kabuli</i>    | Ca_Kabuli_Chr03              | 13185582                       | (A/G)       |
| 3700        | CakSNP3700     | <i>Kabuli</i>    | Ca_Kabuli_Chr03              | 13185590                       | (C/A)       |
| 3701        | CakSNP3701     | <i>Kabuli</i>    | Ca_Kabuli_Chr03              | 13185591                       | (C/T)       |
| 3702        | CakSNP3702     | <i>Kabuli</i>    | Ca_Kabuli_Chr03              | 13185592                       | (A/C)       |
| 3703        | CakSNP3703     | <i>Kabuli</i>    | Ca_Kabuli_Chr03              | 13202989                       | (C/T)       |
| 3704        | CakSNP3704     | <i>Kabuli</i>    | Ca_Kabuli_Chr03              | 13396925                       | (A/T)       |
| 3705        | CakSNP3705     | <i>Kabuli</i>    | Ca_Kabuli_Chr03              | 13397207                       | (A/C)       |
| 3706        | CakSNP3706     | <i>Kabuli</i>    | Ca_Kabuli_Chr03              | 13420776                       | (T/C)       |
| 3707        | CakSNP3707     | <i>Kabuli</i>    | Ca_Kabuli_Chr03              | 13420758                       | (A/G)       |
| 3708        | CakSNP3708     | <i>Kabuli</i>    | Ca_Kabuli_Chr03              | 13420756                       | (A/G)       |
| 3709        | CakSNP3709     | <i>Kabuli</i>    | Ca_Kabuli_Chr03              | 13617948                       | (A/C)       |
| 3710        | CakSNP3710     | <i>Kabuli</i>    | Ca_Kabuli_Chr03              | 14200381                       | (A/C)       |
| 3711        | CakSNP3711     | <i>Kabuli</i>    | Ca_Kabuli_Chr03              | 14465236                       | (T/G)       |
| 3712        | CakSNP3712     | <i>Kabuli</i>    | Ca_Kabuli_Chr03              | 14497374                       | (C/A)       |
| 3713        | CakSNP3713     | <i>Kabuli</i>    | Ca_Kabuli_Chr03              | 14653195                       | (G/T)       |
| 3714        | CakSNP3714     | <i>Kabuli</i>    | Ca_Kabuli_Chr03              | 14653194                       | (C/T)       |
| 3715        | CakSNP3715     | <i>Kabuli</i>    | Ca_Kabuli_Chr03              | 14653193                       | (T/G)       |
| 3716        | CakSNP3716     | <i>Kabuli</i>    | Ca_Kabuli_Chr03              | 14653270                       | (C/A)       |
| 3717        | CakSNP3717     | <i>Kabuli</i>    | Ca_Kabuli_Chr03              | 14653271                       | (G/A)       |
| 3718        | CakSNP3718     | <i>Kabuli</i>    | Ca_Kabuli_Chr03              | 14658175                       | (A/C)       |
| 3719        | CakSNP3719     | <i>Kabuli</i>    | Ca_Kabuli_Chr03              | 14812960                       | (A/C)       |
| 3720        | CakSNP3720     | <i>Kabuli</i>    | Ca_Kabuli_Chr03              | 14982667                       | (C/T)       |
| 3721        | CakSNP3721     | <i>Kabuli</i>    | Ca_Kabuli_Chr03              | 14982739                       | (A/T)       |
| 3722        | CakSNP3722     | <i>Kabuli</i>    | Ca_Kabuli_Chr03              | 15744906                       | (T/A)       |
| 3723        | CakSNP3723     | <i>Kabuli</i>    | Ca_Kabuli_Chr03              | 15745010                       | (C/T)       |

| <b>S.N.</b> | <b>SNP IDs</b> | <b>Cultivars</b> | <b>Chromosomes/scaffolds</b> | <b>Physical positions (bp)</b> | <b>SNPs</b> |
|-------------|----------------|------------------|------------------------------|--------------------------------|-------------|
| 3724        | CakSNP3724     | <i>Kabuli</i>    | Ca_Kabuli_Chr03              | 15745017                       | (A/G)       |
| 3725        | CakSNP3725     | <i>Kabuli</i>    | Ca_Kabuli_Chr03              | 15745264                       | (G/C)       |
| 3726        | CakSNP3726     | <i>Kabuli</i>    | Ca_Kabuli_Chr03              | 15745311                       | (G/A)       |
| 3727        | CakSNP3727     | <i>Kabuli</i>    | Ca_Kabuli_Chr03              | 15757804                       | (T/C)       |
| 3728        | CakSNP3728     | <i>Kabuli</i>    | Ca_Kabuli_Chr03              | 15757829                       | (C/T)       |
| 3729        | CakSNP3729     | <i>Kabuli</i>    | Ca_Kabuli_Chr03              | 15757852                       | (A/C)       |
| 3730        | CakSNP3730     | <i>Kabuli</i>    | Ca_Kabuli_Chr03              | 16071411                       | (G/C)       |
| 3731        | CakSNP3731     | <i>Kabuli</i>    | Ca_Kabuli_Chr03              | 16396662                       | (C/G)       |
| 3732        | CakSNP3732     | <i>Kabuli</i>    | Ca_Kabuli_Chr03              | 16396673                       | (A/C)       |
| 3733        | CakSNP3733     | <i>Kabuli</i>    | Ca_Kabuli_Chr03              | 16436286                       | (T/A)       |
| 3734        | CakSNP3734     | <i>Kabuli</i>    | Ca_Kabuli_Chr03              | 16458123                       | (G/T)       |
| 3735        | CakSNP3735     | <i>Kabuli</i>    | Ca_Kabuli_Chr03              | 16458413                       | (T/A)       |
| 3736        | CakSNP3736     | <i>Kabuli</i>    | Ca_Kabuli_Chr03              | 16540328                       | (T/G)       |
| 3737        | CakSNP3737     | <i>Kabuli</i>    | Ca_Kabuli_Chr03              | 16568567                       | (A/G)       |
| 3738        | CakSNP3738     | <i>Kabuli</i>    | Ca_Kabuli_Chr03              | 16621498                       | (G/A)       |
| 3739        | CakSNP3739     | <i>Kabuli</i>    | Ca_Kabuli_Chr03              | 16621624                       | (G/T)       |
| 3740        | CakSNP3740     | <i>Kabuli</i>    | Ca_Kabuli_Chr03              | 16768867                       | (A/G)       |
| 3741        | CakSNP3741     | <i>Kabuli</i>    | Ca_Kabuli_Chr03              | 16768936                       | (A/G)       |
| 3742        | CakSNP3742     | <i>Kabuli</i>    | Ca_Kabuli_Chr03              | 16768917                       | (C/T)       |
| 3743        | CakSNP3743     | <i>Kabuli</i>    | Ca_Kabuli_Chr03              | 16948510                       | (G/T)       |
| 3744        | CakSNP3744     | <i>Kabuli</i>    | Ca_Kabuli_Chr03              | 16948854                       | (A/T)       |
| 3745        | CakSNP3745     | <i>Kabuli</i>    | Ca_Kabuli_Chr03              | 16995243                       | (C/T)       |
| 3746        | CakSNP3746     | <i>Kabuli</i>    | Ca_Kabuli_Chr03              | 16997328                       | (G/A)       |
| 3747        | CakSNP3747     | <i>Kabuli</i>    | Ca_Kabuli_Chr03              | 16997331                       | (C/T)       |
| 3748        | CakSNP3748     | <i>Kabuli</i>    | Ca_Kabuli_Chr03              | 16997400                       | (T/C)       |
| 3749        | CakSNP3749     | <i>Kabuli</i>    | Ca_Kabuli_Chr03              | 17136071                       | (G/C)       |
| 3750        | CakSNP3750     | <i>Kabuli</i>    | Ca_Kabuli_Chr03              | 17136097                       | (T/C)       |
| 3751        | CakSNP3751     | <i>Kabuli</i>    | Ca_Kabuli_Chr03              | 17145639                       | (A/T)       |
| 3752        | CakSNP3752     | <i>Kabuli</i>    | Ca_Kabuli_Chr03              | 17145643                       | (G/T)       |
| 3753        | CakSNP3753     | <i>Kabuli</i>    | Ca_Kabuli_Chr03              | 17181213                       | (A/G)       |
| 3754        | CakSNP3754     | <i>Kabuli</i>    | Ca_Kabuli_Chr03              | 17185682                       | (A/G)       |
| 3755        | CakSNP3755     | <i>Kabuli</i>    | Ca_Kabuli_Chr03              | 17334924                       | (G/T)       |
| 3756        | CakSNP3756     | <i>Kabuli</i>    | Ca_Kabuli_Chr03              | 17335851                       | (A/C)       |
| 3757        | CakSNP3757     | <i>Kabuli</i>    | Ca_Kabuli_Chr03              | 17351553                       | (A/T)       |
| 3758        | CakSNP3758     | <i>Kabuli</i>    | Ca_Kabuli_Chr03              | 17351526                       | (A/C)       |
| 3759        | CakSNP3759     | <i>Kabuli</i>    | Ca_Kabuli_Chr03              | 17459986                       | (T/A)       |
| 3760        | CakSNP3760     | <i>Kabuli</i>    | Ca_Kabuli_Chr03              | 17460002                       | (G/A)       |
| 3761        | CakSNP3761     | <i>Kabuli</i>    | Ca_Kabuli_Chr03              | 17460012                       | (C/A)       |

| <b>S.N.</b> | <b>SNP IDs</b> | <b>Cultivars</b> | <b>Chromosomes/scaffolds</b> | <b>Physical positions (bp)</b> | <b>SNPs</b> |
|-------------|----------------|------------------|------------------------------|--------------------------------|-------------|
| 3762        | CakSNP3762     | <i>Kabuli</i>    | Ca_Kabuli_Chr03              | 17574247                       | (C/T)       |
| 3763        | CakSNP3763     | <i>Kabuli</i>    | Ca_Kabuli_Chr03              | 17635591                       | (T/A)       |
| 3764        | CakSNP3764     | <i>Kabuli</i>    | Ca_Kabuli_Chr03              | 17635531                       | (T/C)       |
| 3765        | CakSNP3765     | <i>Kabuli</i>    | Ca_Kabuli_Chr03              | 17679409                       | (C/T)       |
| 3766        | CakSNP3766     | <i>Kabuli</i>    | Ca_Kabuli_Chr03              | 17679404                       | (C/T)       |
| 3767        | CakSNP3767     | <i>Kabuli</i>    | Ca_Kabuli_Chr03              | 17914677                       | (T/G)       |
| 3768        | CakSNP3768     | <i>Kabuli</i>    | Ca_Kabuli_Chr03              | 17936321                       | (T/C)       |
| 3769        | CakSNP3769     | <i>Kabuli</i>    | Ca_Kabuli_Chr03              | 17936729                       | (G/A)       |
| 3770        | CakSNP3770     | <i>Kabuli</i>    | Ca_Kabuli_Chr03              | 17936842                       | (A/G)       |
| 3771        | CakSNP3771     | <i>Kabuli</i>    | Ca_Kabuli_Chr03              | 17984978                       | (T/G)       |
| 3772        | CakSNP3772     | <i>Kabuli</i>    | Ca_Kabuli_Chr03              | 17986521                       | (G/C)       |
| 3773        | CakSNP3773     | <i>Kabuli</i>    | Ca_Kabuli_Chr03              | 17986525                       | (G/T)       |
| 3774        | CakSNP3774     | <i>Kabuli</i>    | Ca_Kabuli_Chr03              | 17986740                       | (T/C)       |
| 3775        | CakSNP3775     | <i>Kabuli</i>    | Ca_Kabuli_Chr03              | 18215321                       | (G/C)       |
| 3776        | CakSNP3776     | <i>Kabuli</i>    | Ca_Kabuli_Chr03              | 18215332                       | (T/C)       |
| 3777        | CakSNP3777     | <i>Kabuli</i>    | Ca_Kabuli_Chr03              | 18355427                       | (T/C)       |
| 3778        | CakSNP3778     | <i>Kabuli</i>    | Ca_Kabuli_Chr03              | 18355445                       | (T/C)       |
| 3779        | CakSNP3779     | <i>Kabuli</i>    | Ca_Kabuli_Chr03              | 18375547                       | (T/C)       |
| 3780        | CakSNP3780     | <i>Kabuli</i>    | Ca_Kabuli_Chr03              | 18375581                       | (G/C)       |
| 3781        | CakSNP3781     | <i>Kabuli</i>    | Ca_Kabuli_Chr03              | 18382404                       | (T/C)       |
| 3782        | CakSNP3782     | <i>Kabuli</i>    | Ca_Kabuli_Chr03              | 18382438                       | (G/C)       |
| 3783        | CakSNP3783     | <i>Kabuli</i>    | Ca_Kabuli_Chr03              | 18383884                       | (T/C)       |
| 3784        | CakSNP3784     | <i>Kabuli</i>    | Ca_Kabuli_Chr03              | 18476006                       | (A/G)       |
| 3785        | CakSNP3785     | <i>Kabuli</i>    | Ca_Kabuli_Chr03              | 18476065                       | (C/A)       |
| 3786        | CakSNP3786     | <i>Kabuli</i>    | Ca_Kabuli_Chr03              | 18497633                       | (T/C)       |
| 3787        | CakSNP3787     | <i>Kabuli</i>    | Ca_Kabuli_Chr03              | 18573701                       | (T/A)       |
| 3788        | CakSNP3788     | <i>Kabuli</i>    | Ca_Kabuli_Chr03              | 18645114                       | (T/C)       |
| 3789        | CakSNP3789     | <i>Kabuli</i>    | Ca_Kabuli_Chr03              | 18687994                       | (T/A)       |
| 3790        | CakSNP3790     | <i>Kabuli</i>    | Ca_Kabuli_Chr03              | 18709398                       | (G/A)       |
| 3791        | CakSNP3791     | <i>Kabuli</i>    | Ca_Kabuli_Chr03              | 18731098                       | (T/C)       |
| 3792        | CakSNP3792     | <i>Kabuli</i>    | Ca_Kabuli_Chr03              | 18825708                       | (T/C)       |
| 3793        | CakSNP3793     | <i>Kabuli</i>    | Ca_Kabuli_Chr03              | 18825687                       | (T/C)       |
| 3794        | CakSNP3794     | <i>Kabuli</i>    | Ca_Kabuli_Chr03              | 18939425                       | (C/G)       |
| 3795        | CakSNP3795     | <i>Kabuli</i>    | Ca_Kabuli_Chr03              | 19372722                       | (G/T)       |
| 3796        | CakSNP3796     | <i>Kabuli</i>    | Ca_Kabuli_Chr03              | 19372739                       | (C/T)       |
| 3797        | CakSNP3797     | <i>Kabuli</i>    | Ca_Kabuli_Chr03              | 19400104                       | (T/C)       |
| 3798        | CakSNP3798     | <i>Kabuli</i>    | Ca_Kabuli_Chr03              | 19400121                       | (G/T)       |
| 3799        | CakSNP3799     | <i>Kabuli</i>    | Ca_Kabuli_Chr03              | 19400276                       | (C/T)       |

| <b>S.N.</b> | <b>SNP IDs</b> | <b>Cultivars</b> | <b>Chromosomes/scaffolds</b> | <b>Physical positions (bp)</b> | <b>SNPs</b> |
|-------------|----------------|------------------|------------------------------|--------------------------------|-------------|
| 3800        | CakSNP3800     | <i>Kabuli</i>    | Ca_Kabuli_Chr03              | 19442839                       | (G/A)       |
| 3801        | CakSNP3801     | <i>Kabuli</i>    | Ca_Kabuli_Chr03              | 19442884                       | (G/C)       |
| 3802        | CakSNP3802     | <i>Kabuli</i>    | Ca_Kabuli_Chr03              | 19442941                       | (G/A)       |
| 3803        | CakSNP3803     | <i>Kabuli</i>    | Ca_Kabuli_Chr03              | 19445925                       | (A/G)       |
| 3804        | CakSNP3804     | <i>Kabuli</i>    | Ca_Kabuli_Chr03              | 19445920                       | (T/A)       |
| 3805        | CakSNP3805     | <i>Kabuli</i>    | Ca_Kabuli_Chr03              | 19448140                       | (A/G)       |
| 3806        | CakSNP3806     | <i>Kabuli</i>    | Ca_Kabuli_Chr03              | 19475095                       | (G/T)       |
| 3807        | CakSNP3807     | <i>Kabuli</i>    | Ca_Kabuli_Chr03              | 19571396                       | (C/A)       |
| 3808        | CakSNP3808     | <i>Kabuli</i>    | Ca_Kabuli_Chr03              | 19571382                       | (G/T)       |
| 3809        | CakSNP3809     | <i>Kabuli</i>    | Ca_Kabuli_Chr03              | 19571371                       | (A/G)       |
| 3810        | CakSNP3810     | <i>Kabuli</i>    | Ca_Kabuli_Chr03              | 19742600                       | (G/A)       |
| 3811        | CakSNP3811     | <i>Kabuli</i>    | Ca_Kabuli_Chr03              | 19742530                       | (C/T)       |
| 3812        | CakSNP3812     | <i>Kabuli</i>    | Ca_Kabuli_Chr03              | 19788512                       | (G/A)       |
| 3813        | CakSNP3813     | <i>Kabuli</i>    | Ca_Kabuli_Chr03              | 19802763                       | (C/T)       |
| 3814        | CakSNP3814     | <i>Kabuli</i>    | Ca_Kabuli_Chr03              | 19804985                       | (T/C)       |
| 3815        | CakSNP3815     | <i>Kabuli</i>    | Ca_Kabuli_Chr03              | 19805063                       | (A/C)       |
| 3816        | CakSNP3816     | <i>Kabuli</i>    | Ca_Kabuli_Chr03              | 19829510                       | (G/T)       |
| 3817        | CakSNP3817     | <i>Kabuli</i>    | Ca_Kabuli_Chr03              | 19850532                       | (T/C)       |
| 3818        | CakSNP3818     | <i>Kabuli</i>    | Ca_Kabuli_Chr03              | 19850589                       | (C/T)       |
| 3819        | CakSNP3819     | <i>Kabuli</i>    | Ca_Kabuli_Chr03              | 19855217                       | (T/C)       |
| 3820        | CakSNP3820     | <i>Kabuli</i>    | Ca_Kabuli_Chr03              | 19857613                       | (T/A)       |
| 3821        | CakSNP3821     | <i>Kabuli</i>    | Ca_Kabuli_Chr03              | 19883898                       | (T/C)       |
| 3822        | CakSNP3822     | <i>Kabuli</i>    | Ca_Kabuli_Chr03              | 19883927                       | (A/G)       |
| 3823        | CakSNP3823     | <i>Kabuli</i>    | Ca_Kabuli_Chr03              | 19883936                       | (T/G)       |
| 3824        | CakSNP3824     | <i>Kabuli</i>    | Ca_Kabuli_Chr03              | 19896800                       | (C/T)       |
| 3825        | CakSNP3825     | <i>Kabuli</i>    | Ca_Kabuli_Chr03              | 19896849                       | (G/A)       |
| 3826        | CakSNP3826     | <i>Kabuli</i>    | Ca_Kabuli_Chr03              | 19907774                       | (T/C)       |
| 3827        | CakSNP3827     | <i>Kabuli</i>    | Ca_Kabuli_Chr03              | 19956343                       | (C/T)       |
| 3828        | CakSNP3828     | <i>Kabuli</i>    | Ca_Kabuli_Chr03              | 19956391                       | (C/T)       |
| 3829        | CakSNP3829     | <i>Kabuli</i>    | Ca_Kabuli_Chr03              | 19978343                       | (A/C)       |
| 3830        | CakSNP3830     | <i>Kabuli</i>    | Ca_Kabuli_Chr03              | 19978334                       | (A/C)       |
| 3831        | CakSNP3831     | <i>Kabuli</i>    | Ca_Kabuli_Chr03              | 19978407                       | (C/T)       |
| 3832        | CakSNP3832     | <i>Kabuli</i>    | Ca_Kabuli_Chr03              | 19979288                       | (A/T)       |
| 3833        | CakSNP3833     | <i>Kabuli</i>    | Ca_Kabuli_Chr03              | 19979318                       | (C/A)       |
| 3834        | CakSNP3834     | <i>Kabuli</i>    | Ca_Kabuli_Chr03              | 19979390                       | (A/T)       |
| 3835        | CakSNP3835     | <i>Kabuli</i>    | Ca_Kabuli_Chr03              | 20000967                       | (C/G)       |
| 3836        | CakSNP3836     | <i>Kabuli</i>    | Ca_Kabuli_Chr03              | 20030262                       | (T/C)       |
| 3837        | CakSNP3837     | <i>Kabuli</i>    | Ca_Kabuli_Chr03              | 20030298                       | (G/A)       |

| <b>S.N.</b> | <b>SNP IDs</b> | <b>Cultivars</b> | <b>Chromosomes/scaffolds</b> | <b>Physical positions (bp)</b> | <b>SNPs</b> |
|-------------|----------------|------------------|------------------------------|--------------------------------|-------------|
| 3838        | CakSNP3838     | <i>Kabuli</i>    | Ca_Kabuli_Chr03              | 20030484                       | (A/G)       |
| 3839        | CakSNP3839     | <i>Kabuli</i>    | Ca_Kabuli_Chr03              | 20103039                       | (G/A)       |
| 3840        | CakSNP3840     | <i>Kabuli</i>    | Ca_Kabuli_Chr03              | 20103060                       | (C/T)       |
| 3841        | CakSNP3841     | <i>Kabuli</i>    | Ca_Kabuli_Chr03              | 20103126                       | (A/C)       |
| 3842        | CakSNP3842     | <i>Kabuli</i>    | Ca_Kabuli_Chr03              | 20172492                       | (C/T)       |
| 3843        | CakSNP3843     | <i>Kabuli</i>    | Ca_Kabuli_Chr03              | 20240118                       | (T/G)       |
| 3844        | CakSNP3844     | <i>Kabuli</i>    | Ca_Kabuli_Chr03              | 20242663                       | (C/T)       |
| 3845        | CakSNP3845     | <i>Kabuli</i>    | Ca_Kabuli_Chr03              | 20331659                       | (G/A)       |
| 3846        | CakSNP3846     | <i>Kabuli</i>    | Ca_Kabuli_Chr03              | 20365442                       | (A/C)       |
| 3847        | CakSNP3847     | <i>Kabuli</i>    | Ca_Kabuli_Chr03              | 20387399                       | (T/A)       |
| 3848        | CakSNP3848     | <i>Kabuli</i>    | Ca_Kabuli_Chr03              | 20387471                       | (A/G)       |
| 3849        | CakSNP3849     | <i>Kabuli</i>    | Ca_Kabuli_Chr03              | 20415660                       | (C/G)       |
| 3850        | CakSNP3850     | <i>Kabuli</i>    | Ca_Kabuli_Chr03              | 20415615                       | (A/G)       |
| 3851        | CakSNP3851     | <i>Kabuli</i>    | Ca_Kabuli_Chr03              | 20462715                       | (T/A)       |
| 3852        | CakSNP3852     | <i>Kabuli</i>    | Ca_Kabuli_Chr03              | 20490488                       | (T/C)       |
| 3853        | CakSNP3853     | <i>Kabuli</i>    | Ca_Kabuli_Chr03              | 20495810                       | (G/A)       |
| 3854        | CakSNP3854     | <i>Kabuli</i>    | Ca_Kabuli_Chr03              | 20503939                       | (G/T)       |
| 3855        | CakSNP3855     | <i>Kabuli</i>    | Ca_Kabuli_Chr03              | 20506663                       | (C/G)       |
| 3856        | CakSNP3856     | <i>Kabuli</i>    | Ca_Kabuli_Chr03              | 20552836                       | (T/G)       |
| 3857        | CakSNP3857     | <i>Kabuli</i>    | Ca_Kabuli_Chr03              | 20555942                       | (G/A)       |
| 3858        | CakSNP3858     | <i>Kabuli</i>    | Ca_Kabuli_Chr03              | 20690207                       | (T/G)       |
| 3859        | CakSNP3859     | <i>Kabuli</i>    | Ca_Kabuli_Chr03              | 20690185                       | (A/T)       |
| 3860        | CakSNP3860     | <i>Kabuli</i>    | Ca_Kabuli_Chr03              | 20794236                       | (A/T)       |
| 3861        | CakSNP3861     | <i>Kabuli</i>    | Ca_Kabuli_Chr03              | 20794206                       | (A/T)       |
| 3862        | CakSNP3862     | <i>Kabuli</i>    | Ca_Kabuli_Chr03              | 20794984                       | (C/T)       |
| 3863        | CakSNP3863     | <i>Kabuli</i>    | Ca_Kabuli_Chr03              | 20795019                       | (C/T)       |
| 3864        | CakSNP3864     | <i>Kabuli</i>    | Ca_Kabuli_Chr03              | 20795014                       | (C/T)       |
| 3865        | CakSNP3865     | <i>Kabuli</i>    | Ca_Kabuli_Chr03              | 20794976                       | (A/C)       |
| 3866        | CakSNP3866     | <i>Kabuli</i>    | Ca_Kabuli_Chr03              | 20794993                       | (A/G)       |
| 3867        | CakSNP3867     | <i>Kabuli</i>    | Ca_Kabuli_Chr03              | 20794990                       | (G/A)       |
| 3868        | CakSNP3868     | <i>Kabuli</i>    | Ca_Kabuli_Chr03              | 20799767                       | (A/G)       |
| 3869        | CakSNP3869     | <i>Kabuli</i>    | Ca_Kabuli_Chr03              | 20799778                       | (C/T)       |
| 3870        | CakSNP3870     | <i>Kabuli</i>    | Ca_Kabuli_Chr03              | 20799811                       | (C/T)       |
| 3871        | CakSNP3871     | <i>Kabuli</i>    | Ca_Kabuli_Chr03              | 20799860                       | (A/G)       |
| 3872        | CakSNP3872     | <i>Kabuli</i>    | Ca_Kabuli_Chr03              | 20799841                       | (C/T)       |
| 3873        | CakSNP3873     | <i>Kabuli</i>    | Ca_Kabuli_Chr03              | 20799819                       | (C/T)       |
| 3874        | CakSNP3874     | <i>Kabuli</i>    | Ca_Kabuli_Chr03              | 20799820                       | (A/G)       |
| 3875        | CakSNP3875     | <i>Kabuli</i>    | Ca_Kabuli_Chr03              | 20822676                       | (T/C)       |



| <b>S.N.</b> | <b>SNP IDs</b> | <b>Cultivars</b> | <b>Chromosomes/scaffolds</b> | <b>Physical positions (bp)</b> | <b>SNPs</b> |
|-------------|----------------|------------------|------------------------------|--------------------------------|-------------|
| 3876        | CakSNP3876     | <i>Kabuli</i>    | Ca_Kabuli_Chr03              | 20823146                       | (C/T)       |
| 3877        | CakSNP3877     | <i>Kabuli</i>    | Ca_Kabuli_Chr03              | 20828272                       | (G/T)       |
| 3878        | CakSNP3878     | <i>Kabuli</i>    | Ca_Kabuli_Chr03              | 20829399                       | (A/G)       |
| 3879        | CakSNP3879     | <i>Kabuli</i>    | Ca_Kabuli_Chr03              | 20829407                       | (T/G)       |
| 3880        | CakSNP3880     | <i>Kabuli</i>    | Ca_Kabuli_Chr03              | 20841298                       | (T/G)       |
| 3881        | CakSNP3881     | <i>Kabuli</i>    | Ca_Kabuli_Chr03              | 20841352                       | (C/T)       |
| 3882        | CakSNP3882     | <i>Kabuli</i>    | Ca_Kabuli_Chr03              | 20880294                       | (T/A)       |
| 3883        | CakSNP3883     | <i>Kabuli</i>    | Ca_Kabuli_Chr03              | 21020182                       | (A/G)       |
| 3884        | CakSNP3884     | <i>Kabuli</i>    | Ca_Kabuli_Chr03              | 21020191                       | (C/T)       |
| 3885        | CakSNP3885     | <i>Kabuli</i>    | Ca_Kabuli_Chr03              | 21069672                       | (A/G)       |
| 3886        | CakSNP3886     | <i>Kabuli</i>    | Ca_Kabuli_Chr03              | 21069714                       | (G/A)       |
| 3887        | CakSNP3887     | <i>Kabuli</i>    | Ca_Kabuli_Chr03              | 21069916                       | (C/T)       |
| 3888        | CakSNP3888     | <i>Kabuli</i>    | Ca_Kabuli_Chr03              | 21069917                       | (G/A)       |
| 3889        | CakSNP3889     | <i>Kabuli</i>    | Ca_Kabuli_Chr03              | 21069938                       | (C/A)       |
| 3890        | CakSNP3890     | <i>Kabuli</i>    | Ca_Kabuli_Chr03              | 21069959                       | (G/A)       |
| 3891        | CakSNP3891     | <i>Kabuli</i>    | Ca_Kabuli_Chr03              | 21069986                       | (A/C)       |
| 3892        | CakSNP3892     | <i>Kabuli</i>    | Ca_Kabuli_Chr03              | 21127162                       | (C/G)       |
| 3893        | CakSNP3893     | <i>Kabuli</i>    | Ca_Kabuli_Chr03              | 21127156                       | (T/G)       |
| 3894        | CakSNP3894     | <i>Kabuli</i>    | Ca_Kabuli_Chr03              | 21198607                       | (A/T)       |
| 3895        | CakSNP3895     | <i>Kabuli</i>    | Ca_Kabuli_Chr03              | 21210002                       | (T/A)       |
| 3896        | CakSNP3896     | <i>Kabuli</i>    | Ca_Kabuli_Chr03              | 21210005                       | (C/A)       |
| 3897        | CakSNP3897     | <i>Kabuli</i>    | Ca_Kabuli_Chr03              | 21210008                       | (T/C)       |
| 3898        | CakSNP3898     | <i>Kabuli</i>    | Ca_Kabuli_Chr03              | 21210049                       | (A/G)       |
| 3899        | CakSNP3899     | <i>Kabuli</i>    | Ca_Kabuli_Chr03              | 21273368                       | (A/G)       |
| 3900        | CakSNP3900     | <i>Kabuli</i>    | Ca_Kabuli_Chr03              | 21288626                       | (C/A)       |
| 3901        | CakSNP3901     | <i>Kabuli</i>    | Ca_Kabuli_Chr03              | 21288652                       | (G/C)       |
| 3902        | CakSNP3902     | <i>Kabuli</i>    | Ca_Kabuli_Chr03              | 21288695                       | (G/A)       |
| 3903        | CakSNP3903     | <i>Kabuli</i>    | Ca_Kabuli_Chr03              | 21335892                       | (C/T)       |
| 3904        | CakSNP3904     | <i>Kabuli</i>    | Ca_Kabuli_Chr03              | 21382790                       | (G/A)       |
| 3905        | CakSNP3905     | <i>Kabuli</i>    | Ca_Kabuli_Chr03              | 21421082                       | (A/G)       |
| 3906        | CakSNP3906     | <i>Kabuli</i>    | Ca_Kabuli_Chr03              | 21421085                       | (G/A)       |
| 3907        | CakSNP3907     | <i>Kabuli</i>    | Ca_Kabuli_Chr03              | 21421146                       | (C/A)       |
| 3908        | CakSNP3908     | <i>Kabuli</i>    | Ca_Kabuli_Chr03              | 21421162                       | (G/A)       |
| 3909        | CakSNP3909     | <i>Kabuli</i>    | Ca_Kabuli_Chr03              | 21421358                       | (G/A)       |
| 3910        | CakSNP3910     | <i>Kabuli</i>    | Ca_Kabuli_Chr03              | 21421362                       | (T/A)       |
| 3911        | CakSNP3911     | <i>Kabuli</i>    | Ca_Kabuli_Chr03              | 21421369                       | (G/A)       |
| 3912        | CakSNP3912     | <i>Kabuli</i>    | Ca_Kabuli_Chr03              | 21421424                       | (G/A)       |
| 3913        | CakSNP3913     | <i>Kabuli</i>    | Ca_Kabuli_Chr03              | 21421440                       | (C/T)       |

| <b>S.N.</b> | <b>SNP IDs</b> | <b>Cultivars</b> | <b>Chromosomes/scaffolds</b> | <b>Physical positions (bp)</b> | <b>SNPs</b> |
|-------------|----------------|------------------|------------------------------|--------------------------------|-------------|
| 3914        | CakSNP3914     | <i>Kabuli</i>    | Ca_Kabuli_Chr03              | 21450650                       | (A/G)       |
| 3915        | CakSNP3915     | <i>Kabuli</i>    | Ca_Kabuli_Chr03              | 21452017                       | (G/A)       |
| 3916        | CakSNP3916     | <i>Kabuli</i>    | Ca_Kabuli_Chr03              | 21468634                       | (G/A)       |
| 3917        | CakSNP3917     | <i>Kabuli</i>    | Ca_Kabuli_Chr03              | 21468692                       | (A/C)       |
| 3918        | CakSNP3918     | <i>Kabuli</i>    | Ca_Kabuli_Chr03              | 21470784                       | (C/T)       |
| 3919        | CakSNP3919     | <i>Kabuli</i>    | Ca_Kabuli_Chr03              | 21500178                       | (G/A)       |
| 3920        | CakSNP3920     | <i>Kabuli</i>    | Ca_Kabuli_Chr03              | 21500179                       | (A/T)       |
| 3921        | CakSNP3921     | <i>Kabuli</i>    | Ca_Kabuli_Chr03              | 21507422                       | (T/C)       |
| 3922        | CakSNP3922     | <i>Kabuli</i>    | Ca_Kabuli_Chr03              | 21524084                       | (T/C)       |
| 3923        | CakSNP3923     | <i>Kabuli</i>    | Ca_Kabuli_Chr03              | 21524192                       | (T/C)       |
| 3924        | CakSNP3924     | <i>Kabuli</i>    | Ca_Kabuli_Chr03              | 21524296                       | (G/T)       |
| 3925        | CakSNP3925     | <i>Kabuli</i>    | Ca_Kabuli_Chr03              | 21524379                       | (A/G)       |
| 3926        | CakSNP3926     | <i>Kabuli</i>    | Ca_Kabuli_Chr03              | 21525184                       | (C/T)       |
| 3927        | CakSNP3927     | <i>Kabuli</i>    | Ca_Kabuli_Chr03              | 21525177                       | (G/A)       |
| 3928        | CakSNP3928     | <i>Kabuli</i>    | Ca_Kabuli_Chr03              | 21558388                       | (A/G)       |
| 3929        | CakSNP3929     | <i>Kabuli</i>    | Ca_Kabuli_Chr03              | 21558357                       | (T/G)       |
| 3930        | CakSNP3930     | <i>Kabuli</i>    | Ca_Kabuli_Chr03              | 21627610                       | (T/C)       |
| 3931        | CakSNP3931     | <i>Kabuli</i>    | Ca_Kabuli_Chr03              | 21634275                       | (A/C)       |
| 3932        | CakSNP3932     | <i>Kabuli</i>    | Ca_Kabuli_Chr03              | 21634271                       | (A/G)       |
| 3933        | CakSNP3933     | <i>Kabuli</i>    | Ca_Kabuli_Chr03              | 21646863                       | (C/T)       |
| 3934        | CakSNP3934     | <i>Kabuli</i>    | Ca_Kabuli_Chr03              | 21646872                       | (T/C)       |
| 3935        | CakSNP3935     | <i>Kabuli</i>    | Ca_Kabuli_Chr03              | 21646893                       | (C/A)       |
| 3936        | CakSNP3936     | <i>Kabuli</i>    | Ca_Kabuli_Chr03              | 21646965                       | (C/T)       |
| 3937        | CakSNP3937     | <i>Kabuli</i>    | Ca_Kabuli_Chr03              | 21646962                       | (A/G)       |
| 3938        | CakSNP3938     | <i>Kabuli</i>    | Ca_Kabuli_Chr03              | 21654592                       | (T/A)       |
| 3939        | CakSNP3939     | <i>Kabuli</i>    | Ca_Kabuli_Chr03              | 21686470                       | (C/T)       |
| 3940        | CakSNP3940     | <i>Kabuli</i>    | Ca_Kabuli_Chr03              | 21687439                       | (G/T)       |
| 3941        | CakSNP3941     | <i>Kabuli</i>    | Ca_Kabuli_Chr03              | 21687966                       | (C/A)       |
| 3942        | CakSNP3942     | <i>Kabuli</i>    | Ca_Kabuli_Chr03              | 21687961                       | (C/A)       |
| 3943        | CakSNP3943     | <i>Kabuli</i>    | Ca_Kabuli_Chr03              | 21687960                       | (G/A)       |
| 3944        | CakSNP3944     | <i>Kabuli</i>    | Ca_Kabuli_Chr03              | 21687959                       | (T/C)       |
| 3945        | CakSNP3945     | <i>Kabuli</i>    | Ca_Kabuli_Chr03              | 21687956                       | (C/T)       |
| 3946        | CakSNP3946     | <i>Kabuli</i>    | Ca_Kabuli_Chr03              | 21687953                       | (C/T)       |
| 3947        | CakSNP3947     | <i>Kabuli</i>    | Ca_Kabuli_Chr03              | 21741914                       | (C/A)       |
| 3948        | CakSNP3948     | <i>Kabuli</i>    | Ca_Kabuli_Chr03              | 21809395                       | (G/A)       |
| 3949        | CakSNP3949     | <i>Kabuli</i>    | Ca_Kabuli_Chr03              | 21809456                       | (T/C)       |
| 3950        | CakSNP3950     | <i>Kabuli</i>    | Ca_Kabuli_Chr03              | 21809457                       | (G/A)       |
| 3951        | CakSNP3951     | <i>Kabuli</i>    | Ca_Kabuli_Chr03              | 21809546                       | (T/A)       |

| <b>S.N.</b> | <b>SNP IDs</b> | <b>Cultivars</b> | <b>Chromosomes/scaffolds</b> | <b>Physical positions (bp)</b> | <b>SNPs</b> |
|-------------|----------------|------------------|------------------------------|--------------------------------|-------------|
| 3952        | CakSNP3952     | <i>Kabuli</i>    | Ca_Kabuli_Chr03              | 21809505                       | (A/G)       |
| 3953        | CakSNP3953     | <i>Kabuli</i>    | Ca_Kabuli_Chr03              | 21809503                       | (T/C)       |
| 3954        | CakSNP3954     | <i>Kabuli</i>    | Ca_Kabuli_Chr03              | 21950053                       | (C/G)       |
| 3955        | CakSNP3955     | <i>Kabuli</i>    | Ca_Kabuli_Chr03              | 21950186                       | (A/G)       |
| 3956        | CakSNP3956     | <i>Kabuli</i>    | Ca_Kabuli_Chr03              | 21950164                       | (A/G)       |
| 3957        | CakSNP3957     | <i>Kabuli</i>    | Ca_Kabuli_Chr03              | 22008087                       | (G/A)       |
| 3958        | CakSNP3958     | <i>Kabuli</i>    | Ca_Kabuli_Chr03              | 22026111                       | (A/G)       |
| 3959        | CakSNP3959     | <i>Kabuli</i>    | Ca_Kabuli_Chr03              | 22026647                       | (A/G)       |
| 3960        | CakSNP3960     | <i>Kabuli</i>    | Ca_Kabuli_Chr03              | 22060199                       | (G/T)       |
| 3961        | CakSNP3961     | <i>Kabuli</i>    | Ca_Kabuli_Chr03              | 22061236                       | (A/G)       |
| 3962        | CakSNP3962     | <i>Kabuli</i>    | Ca_Kabuli_Chr03              | 22062029                       | (G/T)       |
| 3963        | CakSNP3963     | <i>Kabuli</i>    | Ca_Kabuli_Chr03              | 22062958                       | (T/C)       |
| 3964        | CakSNP3964     | <i>Kabuli</i>    | Ca_Kabuli_Chr03              | 22062965                       | (C/T)       |
| 3965        | CakSNP3965     | <i>Kabuli</i>    | Ca_Kabuli_Chr03              | 22063826                       | (G/A)       |
| 3966        | CakSNP3966     | <i>Kabuli</i>    | Ca_Kabuli_Chr03              | 22063829                       | (G/A)       |
| 3967        | CakSNP3967     | <i>Kabuli</i>    | Ca_Kabuli_Chr03              | 22063835                       | (C/T)       |
| 3968        | CakSNP3968     | <i>Kabuli</i>    | Ca_Kabuli_Chr03              | 22073381                       | (C/T)       |
| 3969        | CakSNP3969     | <i>Kabuli</i>    | Ca_Kabuli_Chr03              | 22073447                       | (T/A)       |
| 3970        | CakSNP3970     | <i>Kabuli</i>    | Ca_Kabuli_Chr03              | 22075779                       | (C/G)       |
| 3971        | CakSNP3971     | <i>Kabuli</i>    | Ca_Kabuli_Chr03              | 22075990                       | (T/C)       |
| 3972        | CakSNP3972     | <i>Kabuli</i>    | Ca_Kabuli_Chr03              | 22169816                       | (T/C)       |
| 3973        | CakSNP3973     | <i>Kabuli</i>    | Ca_Kabuli_Chr03              | 22188124                       | (T/C)       |
| 3974        | CakSNP3974     | <i>Kabuli</i>    | Ca_Kabuli_Chr03              | 22188169                       | (T/A)       |
| 3975        | CakSNP3975     | <i>Kabuli</i>    | Ca_Kabuli_Chr03              | 22200927                       | (T/C)       |
| 3976        | CakSNP3976     | <i>Kabuli</i>    | Ca_Kabuli_Chr03              | 22201045                       | (T/A)       |
| 3977        | CakSNP3977     | <i>Kabuli</i>    | Ca_Kabuli_Chr03              | 22202317                       | (C/T)       |
| 3978        | CakSNP3978     | <i>Kabuli</i>    | Ca_Kabuli_Chr03              | 22202819                       | (T/C)       |
| 3979        | CakSNP3979     | <i>Kabuli</i>    | Ca_Kabuli_Chr03              | 22203460                       | (A/G)       |
| 3980        | CakSNP3980     | <i>Kabuli</i>    | Ca_Kabuli_Chr03              | 22225186                       | (C/A)       |
| 3981        | CakSNP3981     | <i>Kabuli</i>    | Ca_Kabuli_Chr03              | 22225154                       | (C/G)       |
| 3982        | CakSNP3982     | <i>Kabuli</i>    | Ca_Kabuli_Chr03              | 22225129                       | (C/G)       |
| 3983        | CakSNP3983     | <i>Kabuli</i>    | Ca_Kabuli_Chr03              | 22233428                       | (G/A)       |
| 3984        | CakSNP3984     | <i>Kabuli</i>    | Ca_Kabuli_Chr03              | 22233409                       | (T/C)       |
| 3985        | CakSNP3985     | <i>Kabuli</i>    | Ca_Kabuli_Chr03              | 22235801                       | (G/A)       |
| 3986        | CakSNP3986     | <i>Kabuli</i>    | Ca_Kabuli_Chr03              | 22253842                       | (T/C)       |
| 3987        | CakSNP3987     | <i>Kabuli</i>    | Ca_Kabuli_Chr03              | 22331057                       | (C/T)       |
| 3988        | CakSNP3988     | <i>Kabuli</i>    | Ca_Kabuli_Chr03              | 22346294                       | (T/C)       |
| 3989        | CakSNP3989     | <i>Kabuli</i>    | Ca_Kabuli_Chr03              | 22404660                       | (G/T)       |

| <b>S.N.</b> | <b>SNP IDs</b> | <b>Cultivars</b> | <b>Chromosomes/scaffolds</b> | <b>Physical positions (bp)</b> | <b>SNPs</b> |
|-------------|----------------|------------------|------------------------------|--------------------------------|-------------|
| 3990        | CakSNP3990     | <i>Kabuli</i>    | Ca_Kabuli_Chr03              | 22527529                       | (A/C)       |
| 3991        | CakSNP3991     | <i>Kabuli</i>    | Ca_Kabuli_Chr03              | 22539384                       | (G/A)       |
| 3992        | CakSNP3992     | <i>Kabuli</i>    | Ca_Kabuli_Chr03              | 22539702                       | (C/T)       |
| 3993        | CakSNP3993     | <i>Kabuli</i>    | Ca_Kabuli_Chr03              | 22539885                       | (C/T)       |
| 3994        | CakSNP3994     | <i>Kabuli</i>    | Ca_Kabuli_Chr03              | 22539952                       | (G/A)       |
| 3995        | CakSNP3995     | <i>Kabuli</i>    | Ca_Kabuli_Chr03              | 22636201                       | (T/C)       |
| 3996        | CakSNP3996     | <i>Kabuli</i>    | Ca_Kabuli_Chr03              | 22646897                       | (T/C)       |
| 3997        | CakSNP3997     | <i>Kabuli</i>    | Ca_Kabuli_Chr03              | 22659924                       | (G/A)       |
| 3998        | CakSNP3998     | <i>Kabuli</i>    | Ca_Kabuli_Chr03              | 22681658                       | (G/A)       |
| 3999        | CakSNP3999     | <i>Kabuli</i>    | Ca_Kabuli_Chr03              | 22719470                       | (T/C)       |
| 4000        | CakSNP4000     | <i>Kabuli</i>    | Ca_Kabuli_Chr03              | 22719487                       | (T/C)       |
| 4001        | CakSNP4001     | <i>Kabuli</i>    | Ca_Kabuli_Chr03              | 22719494                       | (C/T)       |
| 4002        | CakSNP4002     | <i>Kabuli</i>    | Ca_Kabuli_Chr03              | 22719519                       | (G/A)       |
| 4003        | CakSNP4003     | <i>Kabuli</i>    | Ca_Kabuli_Chr03              | 22727393                       | (G/A)       |
| 4004        | CakSNP4004     | <i>Kabuli</i>    | Ca_Kabuli_Chr03              | 22727439                       | (A/C)       |
| 4005        | CakSNP4005     | <i>Kabuli</i>    | Ca_Kabuli_Chr03              | 22765806                       | (G/A)       |
| 4006        | CakSNP4006     | <i>Kabuli</i>    | Ca_Kabuli_Chr03              | 22765862                       | (T/C)       |
| 4007        | CakSNP4007     | <i>Kabuli</i>    | Ca_Kabuli_Chr03              | 22765987                       | (G/T)       |
| 4008        | CakSNP4008     | <i>Kabuli</i>    | Ca_Kabuli_Chr03              | 22798281                       | (T/G)       |
| 4009        | CakSNP4009     | <i>Kabuli</i>    | Ca_Kabuli_Chr03              | 22812717                       | (A/T)       |
| 4010        | CakSNP4010     | <i>Kabuli</i>    | Ca_Kabuli_Chr03              | 22846051                       | (G/A)       |
| 4011        | CakSNP4011     | <i>Kabuli</i>    | Ca_Kabuli_Chr03              | 22847885                       | (G/T)       |
| 4012        | CakSNP4012     | <i>Kabuli</i>    | Ca_Kabuli_Chr03              | 22847984                       | (A/G)       |
| 4013        | CakSNP4013     | <i>Kabuli</i>    | Ca_Kabuli_Chr03              | 22990523                       | (C/T)       |
| 4014        | CakSNP4014     | <i>Kabuli</i>    | Ca_Kabuli_Chr03              | 23028855                       | (A/G)       |
| 4015        | CakSNP4015     | <i>Kabuli</i>    | Ca_Kabuli_Chr03              | 23033373                       | (A/C)       |
| 4016        | CakSNP4016     | <i>Kabuli</i>    | Ca_Kabuli_Chr03              | 23042249                       | (A/C)       |
| 4017        | CakSNP4017     | <i>Kabuli</i>    | Ca_Kabuli_Chr03              | 23053008                       | (C/G)       |
| 4018        | CakSNP4018     | <i>Kabuli</i>    | Ca_Kabuli_Chr03              | 23053005                       | (G/C)       |
| 4019        | CakSNP4019     | <i>Kabuli</i>    | Ca_Kabuli_Chr03              | 23053066                       | (A/C)       |
| 4020        | CakSNP4020     | <i>Kabuli</i>    | Ca_Kabuli_Chr03              | 23095498                       | (C/T)       |
| 4021        | CakSNP4021     | <i>Kabuli</i>    | Ca_Kabuli_Chr03              | 23273057                       | (T/A)       |
| 4022        | CakSNP4022     | <i>Kabuli</i>    | Ca_Kabuli_Chr03              | 23273069                       | (C/G)       |
| 4023        | CakSNP4023     | <i>Kabuli</i>    | Ca_Kabuli_Chr03              | 23327648                       | (C/T)       |
| 4024        | CakSNP4024     | <i>Kabuli</i>    | Ca_Kabuli_Chr03              | 23327700                       | (G/C)       |
| 4025        | CakSNP4025     | <i>Kabuli</i>    | Ca_Kabuli_Chr03              | 23331530                       | (T/G)       |
| 4026        | CakSNP4026     | <i>Kabuli</i>    | Ca_Kabuli_Chr03              | 23335788                       | (A/T)       |
| 4027        | CakSNP4027     | <i>Kabuli</i>    | Ca_Kabuli_Chr03              | 23335789                       | (T/G)       |

| <b>S.N.</b> | <b>SNP IDs</b> | <b>Cultivars</b> | <b>Chromosomes/scaffolds</b> | <b>Physical positions (bp)</b> | <b>SNPs</b> |
|-------------|----------------|------------------|------------------------------|--------------------------------|-------------|
| 4028        | CakSNP4028     | <i>Kabuli</i>    | Ca_Kabuli_Chr03              | 23340171                       | (A/G)       |
| 4029        | CakSNP4029     | <i>Kabuli</i>    | Ca_Kabuli_Chr03              | 23340134                       | (G/A)       |
| 4030        | CakSNP4030     | <i>Kabuli</i>    | Ca_Kabuli_Chr03              | 23340133                       | (T/C)       |
| 4031        | CakSNP4031     | <i>Kabuli</i>    | Ca_Kabuli_Chr03              | 23341384                       | (T/G)       |
| 4032        | CakSNP4032     | <i>Kabuli</i>    | Ca_Kabuli_Chr03              | 23342297                       | (T/C)       |
| 4033        | CakSNP4033     | <i>Kabuli</i>    | Ca_Kabuli_Chr03              | 23342305                       | (T/C)       |
| 4034        | CakSNP4034     | <i>Kabuli</i>    | Ca_Kabuli_Chr03              | 23342338                       | (G/T)       |
| 4035        | CakSNP4035     | <i>Kabuli</i>    | Ca_Kabuli_Chr03              | 23342347                       | (G/A)       |
| 4036        | CakSNP4036     | <i>Kabuli</i>    | Ca_Kabuli_Chr03              | 23342350                       | (A/G)       |
| 4037        | CakSNP4037     | <i>Kabuli</i>    | Ca_Kabuli_Chr03              | 23342351                       | (T/C)       |
| 4038        | CakSNP4038     | <i>Kabuli</i>    | Ca_Kabuli_Chr03              | 23360857                       | (C/T)       |
| 4039        | CakSNP4039     | <i>Kabuli</i>    | Ca_Kabuli_Chr03              | 23400864                       | (A/C)       |
| 4040        | CakSNP4040     | <i>Kabuli</i>    | Ca_Kabuli_Chr03              | 23455008                       | (A/G)       |
| 4041        | CakSNP4041     | <i>Kabuli</i>    | Ca_Kabuli_Chr03              | 23455128                       | (A/G)       |
| 4042        | CakSNP4042     | <i>Kabuli</i>    | Ca_Kabuli_Chr03              | 23461370                       | (C/A)       |
| 4043        | CakSNP4043     | <i>Kabuli</i>    | Ca_Kabuli_Chr03              | 23555586                       | (C/A)       |
| 4044        | CakSNP4044     | <i>Kabuli</i>    | Ca_Kabuli_Chr03              | 23593288                       | (G/A)       |
| 4045        | CakSNP4045     | <i>Kabuli</i>    | Ca_Kabuli_Chr03              | 23593294                       | (T/C)       |
| 4046        | CakSNP4046     | <i>Kabuli</i>    | Ca_Kabuli_Chr03              | 23593309                       | (T/C)       |
| 4047        | CakSNP4047     | <i>Kabuli</i>    | Ca_Kabuli_Chr03              | 23593269                       | (T/C)       |
| 4048        | CakSNP4048     | <i>Kabuli</i>    | Ca_Kabuli_Chr03              | 23714158                       | (T/A)       |
| 4049        | CakSNP4049     | <i>Kabuli</i>    | Ca_Kabuli_Chr03              | 23714129                       | (C/A)       |
| 4050        | CakSNP4050     | <i>Kabuli</i>    | Ca_Kabuli_Chr03              | 23745324                       | (C/T)       |
| 4051        | CakSNP4051     | <i>Kabuli</i>    | Ca_Kabuli_Chr03              | 23792975                       | (A/T)       |
| 4052        | CakSNP4052     | <i>Kabuli</i>    | Ca_Kabuli_Chr03              | 23833683                       | (G/A)       |
| 4053        | CakSNP4053     | <i>Kabuli</i>    | Ca_Kabuli_Chr03              | 23833680                       | (G/C)       |
| 4054        | CakSNP4054     | <i>Kabuli</i>    | Ca_Kabuli_Chr03              | 23833668                       | (G/A)       |
| 4055        | CakSNP4055     | <i>Kabuli</i>    | Ca_Kabuli_Chr03              | 23886582                       | (A/G)       |
| 4056        | CakSNP4056     | <i>Kabuli</i>    | Ca_Kabuli_Chr03              | 23918105                       | (T/C)       |
| 4057        | CakSNP4057     | <i>Kabuli</i>    | Ca_Kabuli_Chr03              | 23966110                       | (G/A)       |
| 4058        | CakSNP4058     | <i>Kabuli</i>    | Ca_Kabuli_Chr03              | 23997287                       | (A/T)       |
| 4059        | CakSNP4059     | <i>Kabuli</i>    | Ca_Kabuli_Chr03              | 24000847                       | (G/T)       |
| 4060        | CakSNP4060     | <i>Kabuli</i>    | Ca_Kabuli_Chr03              | 24000818                       | (T/C)       |
| 4061        | CakSNP4061     | <i>Kabuli</i>    | Ca_Kabuli_Chr03              | 24024560                       | (T/C)       |
| 4062        | CakSNP4062     | <i>Kabuli</i>    | Ca_Kabuli_Chr03              | 24024513                       | (A/C)       |
| 4063        | CakSNP4063     | <i>Kabuli</i>    | Ca_Kabuli_Chr03              | 24025900                       | (G/C)       |
| 4064        | CakSNP4064     | <i>Kabuli</i>    | Ca_Kabuli_Chr03              | 24025924                       | (T/G)       |
| 4065        | CakSNP4065     | <i>Kabuli</i>    | Ca_Kabuli_Chr03              | 24026428                       | (C/T)       |

| <b>S.N.</b> | <b>SNP IDs</b> | <b>Cultivars</b> | <b>Chromosomes/scaffolds</b> | <b>Physical positions (bp)</b> | <b>SNPs</b> |
|-------------|----------------|------------------|------------------------------|--------------------------------|-------------|
| 4066        | CakSNP4066     | <i>Kabuli</i>    | Ca_Kabuli_Chr03              | 24041806                       | (C/T)       |
| 4067        | CakSNP4067     | <i>Kabuli</i>    | Ca_Kabuli_Chr03              | 24095268                       | (T/C)       |
| 4068        | CakSNP4068     | <i>Kabuli</i>    | Ca_Kabuli_Chr03              | 24099191                       | (C/G)       |
| 4069        | CakSNP4069     | <i>Kabuli</i>    | Ca_Kabuli_Chr03              | 24127222                       | (C/T)       |
| 4070        | CakSNP4070     | <i>Kabuli</i>    | Ca_Kabuli_Chr03              | 24127201                       | (A/C)       |
| 4071        | CakSNP4071     | <i>Kabuli</i>    | Ca_Kabuli_Chr03              | 24162153                       | (C/T)       |
| 4072        | CakSNP4072     | <i>Kabuli</i>    | Ca_Kabuli_Chr03              | 24194574                       | (C/T)       |
| 4073        | CakSNP4073     | <i>Kabuli</i>    | Ca_Kabuli_Chr03              | 24247161                       | (G/C)       |
| 4074        | CakSNP4074     | <i>Kabuli</i>    | Ca_Kabuli_Chr03              | 24297842                       | (T/G)       |
| 4075        | CakSNP4075     | <i>Kabuli</i>    | Ca_Kabuli_Chr03              | 24297894                       | (C/A)       |
| 4076        | CakSNP4076     | <i>Kabuli</i>    | Ca_Kabuli_Chr03              | 24417477                       | (T/G)       |
| 4077        | CakSNP4077     | <i>Kabuli</i>    | Ca_Kabuli_Chr03              | 24417507                       | (A/T)       |
| 4078        | CakSNP4078     | <i>Kabuli</i>    | Ca_Kabuli_Chr03              | 24418063                       | (G/T)       |
| 4079        | CakSNP4079     | <i>Kabuli</i>    | Ca_Kabuli_Chr03              | 24418111                       | (A/G)       |
| 4080        | CakSNP4080     | <i>Kabuli</i>    | Ca_Kabuli_Chr03              | 24418130                       | (T/A)       |
| 4081        | CakSNP4081     | <i>Kabuli</i>    | Ca_Kabuli_Chr03              | 24459669                       | (G/A)       |
| 4082        | CakSNP4082     | <i>Kabuli</i>    | Ca_Kabuli_Chr03              | 24515489                       | (T/G)       |
| 4083        | CakSNP4083     | <i>Kabuli</i>    | Ca_Kabuli_Chr03              | 24538726                       | (A/C)       |
| 4084        | CakSNP4084     | <i>Kabuli</i>    | Ca_Kabuli_Chr03              | 24540199                       | (A/G)       |
| 4085        | CakSNP4085     | <i>Kabuli</i>    | Ca_Kabuli_Chr03              | 24540304                       | (T/C)       |
| 4086        | CakSNP4086     | <i>Kabuli</i>    | Ca_Kabuli_Chr03              | 24637834                       | (G/T)       |
| 4087        | CakSNP4087     | <i>Kabuli</i>    | Ca_Kabuli_Chr03              | 24637837                       | (A/C)       |
| 4088        | CakSNP4088     | <i>Kabuli</i>    | Ca_Kabuli_Chr03              | 24664582                       | (G/T)       |
| 4089        | CakSNP4089     | <i>Kabuli</i>    | Ca_Kabuli_Chr03              | 24664550                       | (T/G)       |
| 4090        | CakSNP4090     | <i>Kabuli</i>    | Ca_Kabuli_Chr03              | 24664651                       | (G/T)       |
| 4091        | CakSNP4091     | <i>Kabuli</i>    | Ca_Kabuli_Chr03              | 24666594                       | (T/C)       |
| 4092        | CakSNP4092     | <i>Kabuli</i>    | Ca_Kabuli_Chr03              | 24763730                       | (A/G)       |
| 4093        | CakSNP4093     | <i>Kabuli</i>    | Ca_Kabuli_Chr03              | 24933940                       | (T/C)       |
| 4094        | CakSNP4094     | <i>Kabuli</i>    | Ca_Kabuli_Chr03              | 24933901                       | (C/A)       |
| 4095        | CakSNP4095     | <i>Kabuli</i>    | Ca_Kabuli_Chr03              | 24933899                       | (G/T)       |
| 4096        | CakSNP4096     | <i>Kabuli</i>    | Ca_Kabuli_Chr03              | 24998316                       | (C/G)       |
| 4097        | CakSNP4097     | <i>Kabuli</i>    | Ca_Kabuli_Chr03              | 24998300                       | (C/T)       |
| 4098        | CakSNP4098     | <i>Kabuli</i>    | Ca_Kabuli_Chr03              | 25037746                       | (G/A)       |
| 4099        | CakSNP4099     | <i>Kabuli</i>    | Ca_Kabuli_Chr03              | 25046423                       | (C/G)       |
| 4100        | CakSNP4100     | <i>Kabuli</i>    | Ca_Kabuli_Chr03              | 25046421                       | (T/C)       |
| 4101        | CakSNP4101     | <i>Kabuli</i>    | Ca_Kabuli_Chr03              | 25055049                       | (C/T)       |
| 4102        | CakSNP4102     | <i>Kabuli</i>    | Ca_Kabuli_Chr03              | 25062250                       | (C/A)       |
| 4103        | CakSNP4103     | <i>Kabuli</i>    | Ca_Kabuli_Chr03              | 25110037                       | (T/G)       |

| <b>S.N.</b> | <b>SNP IDs</b> | <b>Cultivars</b> | <b>Chromosomes/scaffolds</b> | <b>Physical positions (bp)</b> | <b>SNPs</b> |
|-------------|----------------|------------------|------------------------------|--------------------------------|-------------|
| 4104        | CakSNP4104     | <i>Kabuli</i>    | Ca_Kabuli_Chr03              | 25137192                       | (T/A)       |
| 4105        | CakSNP4105     | <i>Kabuli</i>    | Ca_Kabuli_Chr03              | 25147096                       | (G/A)       |
| 4106        | CakSNP4106     | <i>Kabuli</i>    | Ca_Kabuli_Chr03              | 25205548                       | (C/A)       |
| 4107        | CakSNP4107     | <i>Kabuli</i>    | Ca_Kabuli_Chr03              | 25241115                       | (G/A)       |
| 4108        | CakSNP4108     | <i>Kabuli</i>    | Ca_Kabuli_Chr03              | 25244194                       | (A/C)       |
| 4109        | CakSNP4109     | <i>Kabuli</i>    | Ca_Kabuli_Chr03              | 25270592                       | (C/G)       |
| 4110        | CakSNP4110     | <i>Kabuli</i>    | Ca_Kabuli_Chr03              | 25399911                       | (C/G)       |
| 4111        | CakSNP4111     | <i>Kabuli</i>    | Ca_Kabuli_Chr03              | 25457474                       | (T/A)       |
| 4112        | CakSNP4112     | <i>Kabuli</i>    | Ca_Kabuli_Chr03              | 25457494                       | (A/T)       |
| 4113        | CakSNP4113     | <i>Kabuli</i>    | Ca_Kabuli_Chr03              | 25457514                       | (C/A)       |
| 4114        | CakSNP4114     | <i>Kabuli</i>    | Ca_Kabuli_Chr03              | 25462227                       | (A/C)       |
| 4115        | CakSNP4115     | <i>Kabuli</i>    | Ca_Kabuli_Chr03              | 25504708                       | (A/G)       |
| 4116        | CakSNP4116     | <i>Kabuli</i>    | Ca_Kabuli_Chr03              | 25505438                       | (C/T)       |
| 4117        | CakSNP4117     | <i>Kabuli</i>    | Ca_Kabuli_Chr03              | 25505420                       | (G/T)       |
| 4118        | CakSNP4118     | <i>Kabuli</i>    | Ca_Kabuli_Chr03              | 25534044                       | (C/T)       |
| 4119        | CakSNP4119     | <i>Kabuli</i>    | Ca_Kabuli_Chr03              | 25538867                       | (T/C)       |
| 4120        | CakSNP4120     | <i>Kabuli</i>    | Ca_Kabuli_Chr03              | 25580072                       | (A/T)       |
| 4121        | CakSNP4121     | <i>Kabuli</i>    | Ca_Kabuli_Chr03              | 25614515                       | (T/G)       |
| 4122        | CakSNP4122     | <i>Kabuli</i>    | Ca_Kabuli_Chr03              | 25641434                       | (C/A)       |
| 4123        | CakSNP4123     | <i>Kabuli</i>    | Ca_Kabuli_Chr03              | 25641433                       | (G/A)       |
| 4124        | CakSNP4124     | <i>Kabuli</i>    | Ca_Kabuli_Chr03              | 25688341                       | (G/A)       |
| 4125        | CakSNP4125     | <i>Kabuli</i>    | Ca_Kabuli_Chr03              | 25702238                       | (G/A)       |
| 4126        | CakSNP4126     | <i>Kabuli</i>    | Ca_Kabuli_Chr03              | 25718829                       | (C/A)       |
| 4127        | CakSNP4127     | <i>Kabuli</i>    | Ca_Kabuli_Chr03              | 25718827                       | (T/A)       |
| 4128        | CakSNP4128     | <i>Kabuli</i>    | Ca_Kabuli_Chr03              | 25757693                       | (C/T)       |
| 4129        | CakSNP4129     | <i>Kabuli</i>    | Ca_Kabuli_Chr03              | 25987920                       | (T/G)       |
| 4130        | CakSNP4130     | <i>Kabuli</i>    | Ca_Kabuli_Chr03              | 26119425                       | (T/G)       |
| 4131        | CakSNP4131     | <i>Kabuli</i>    | Ca_Kabuli_Chr03              | 26119461                       | (C/T)       |
| 4132        | CakSNP4132     | <i>Kabuli</i>    | Ca_Kabuli_Chr03              | 26163449                       | (G/A)       |
| 4133        | CakSNP4133     | <i>Kabuli</i>    | Ca_Kabuli_Chr03              | 26178592                       | (G/A)       |
| 4134        | CakSNP4134     | <i>Kabuli</i>    | Ca_Kabuli_Chr03              | 26198368                       | (G/A)       |
| 4135        | CakSNP4135     | <i>Kabuli</i>    | Ca_Kabuli_Chr03              | 26198372                       | (G/A)       |
| 4136        | CakSNP4136     | <i>Kabuli</i>    | Ca_Kabuli_Chr03              | 26293846                       | (A/G)       |
| 4137        | CakSNP4137     | <i>Kabuli</i>    | Ca_Kabuli_Chr03              | 26335889                       | (T/A)       |
| 4138        | CakSNP4138     | <i>Kabuli</i>    | Ca_Kabuli_Chr03              | 26339286                       | (T/C)       |
| 4139        | CakSNP4139     | <i>Kabuli</i>    | Ca_Kabuli_Chr03              | 26339449                       | (G/T)       |
| 4140        | CakSNP4140     | <i>Kabuli</i>    | Ca_Kabuli_Chr03              | 26562004                       | (A/G)       |
| 4141        | CakSNP4141     | <i>Kabuli</i>    | Ca_Kabuli_Chr03              | 26573902                       | (A/G)       |

| <b>S.N.</b> | <b>SNP IDs</b> | <b>Cultivars</b> | <b>Chromosomes/scaffolds</b> | <b>Physical positions (bp)</b> | <b>SNPs</b> |
|-------------|----------------|------------------|------------------------------|--------------------------------|-------------|
| 4142        | CakSNP4142     | <i>Kabuli</i>    | Ca_Kabuli_Chr03              | 26574056                       | (C/T)       |
| 4143        | CakSNP4143     | <i>Kabuli</i>    | Ca_Kabuli_Chr03              | 26574068                       | (T/G)       |
| 4144        | CakSNP4144     | <i>Kabuli</i>    | Ca_Kabuli_Chr03              | 26574831                       | (A/G)       |
| 4145        | CakSNP4145     | <i>Kabuli</i>    | Ca_Kabuli_Chr03              | 26589678                       | (T/A)       |
| 4146        | CakSNP4146     | <i>Kabuli</i>    | Ca_Kabuli_Chr03              | 26627150                       | (T/G)       |
| 4147        | CakSNP4147     | <i>Kabuli</i>    | Ca_Kabuli_Chr03              | 26636553                       | (A/G)       |
| 4148        | CakSNP4148     | <i>Kabuli</i>    | Ca_Kabuli_Chr03              | 26646152                       | (C/T)       |
| 4149        | CakSNP4149     | <i>Kabuli</i>    | Ca_Kabuli_Chr03              | 26678343                       | (T/C)       |
| 4150        | CakSNP4150     | <i>Kabuli</i>    | Ca_Kabuli_Chr03              | 26678433                       | (T/G)       |
| 4151        | CakSNP4151     | <i>Kabuli</i>    | Ca_Kabuli_Chr03              | 26726897                       | (C/A)       |
| 4152        | CakSNP4152     | <i>Kabuli</i>    | Ca_Kabuli_Chr03              | 26758452                       | (C/A)       |
| 4153        | CakSNP4153     | <i>Kabuli</i>    | Ca_Kabuli_Chr03              | 26848870                       | (G/C)       |
| 4154        | CakSNP4154     | <i>Kabuli</i>    | Ca_Kabuli_Chr03              | 26849288                       | (T/A)       |
| 4155        | CakSNP4155     | <i>Kabuli</i>    | Ca_Kabuli_Chr03              | 26878028                       | (A/T)       |
| 4156        | CakSNP4156     | <i>Kabuli</i>    | Ca_Kabuli_Chr03              | 26900271                       | (T/A)       |
| 4157        | CakSNP4157     | <i>Kabuli</i>    | Ca_Kabuli_Chr03              | 26911443                       | (A/T)       |
| 4158        | CakSNP4158     | <i>Kabuli</i>    | Ca_Kabuli_Chr03              | 26911514                       | (A/G)       |
| 4159        | CakSNP4159     | <i>Kabuli</i>    | Ca_Kabuli_Chr03              | 26911723                       | (T/A)       |
| 4160        | CakSNP4160     | <i>Kabuli</i>    | Ca_Kabuli_Chr03              | 26911792                       | (A/G)       |
| 4161        | CakSNP4161     | <i>Kabuli</i>    | Ca_Kabuli_Chr03              | 26976249                       | (A/G)       |
| 4162        | CakSNP4162     | <i>Kabuli</i>    | Ca_Kabuli_Chr03              | 26976323                       | (G/A)       |
| 4163        | CakSNP4163     | <i>Kabuli</i>    | Ca_Kabuli_Chr03              | 27024215                       | (T/C)       |
| 4164        | CakSNP4164     | <i>Kabuli</i>    | Ca_Kabuli_Chr03              | 27047840                       | (A/G)       |
| 4165        | CakSNP4165     | <i>Kabuli</i>    | Ca_Kabuli_Chr03              | 27047847                       | (A/C)       |
| 4166        | CakSNP4166     | <i>Kabuli</i>    | Ca_Kabuli_Chr03              | 27063150                       | (A/C)       |
| 4167        | CakSNP4167     | <i>Kabuli</i>    | Ca_Kabuli_Chr03              | 27074842                       | (C/A)       |
| 4168        | CakSNP4168     | <i>Kabuli</i>    | Ca_Kabuli_Chr03              | 27074896                       | (A/T)       |
| 4169        | CakSNP4169     | <i>Kabuli</i>    | Ca_Kabuli_Chr03              | 27074931                       | (A/T)       |
| 4170        | CakSNP4170     | <i>Kabuli</i>    | Ca_Kabuli_Chr03              | 27074930                       | (A/C)       |
| 4171        | CakSNP4171     | <i>Kabuli</i>    | Ca_Kabuli_Chr03              | 27076716                       | (T/C)       |
| 4172        | CakSNP4172     | <i>Kabuli</i>    | Ca_Kabuli_Chr03              | 27076735                       | (T/G)       |
| 4173        | CakSNP4173     | <i>Kabuli</i>    | Ca_Kabuli_Chr03              | 27076744                       | (C/A)       |
| 4174        | CakSNP4174     | <i>Kabuli</i>    | Ca_Kabuli_Chr03              | 27105637                       | (C/T)       |
| 4175        | CakSNP4175     | <i>Kabuli</i>    | Ca_Kabuli_Chr03              | 27157840                       | (T/A)       |
| 4176        | CakSNP4176     | <i>Kabuli</i>    | Ca_Kabuli_Chr03              | 27157848                       | (C/T)       |
| 4177        | CakSNP4177     | <i>Kabuli</i>    | Ca_Kabuli_Chr03              | 27161813                       | (T/G)       |
| 4178        | CakSNP4178     | <i>Kabuli</i>    | Ca_Kabuli_Chr03              | 27161801                       | (A/G)       |
| 4179        | CakSNP4179     | <i>Kabuli</i>    | Ca_Kabuli_Chr03              | 27194033                       | (C/T)       |



| <b>S.N.</b> | <b>SNP IDs</b> | <b>Cultivars</b> | <b>Chromosomes/scaffolds</b> | <b>Physical positions (bp)</b> | <b>SNPs</b> |
|-------------|----------------|------------------|------------------------------|--------------------------------|-------------|
| 4180        | CakSNP4180     | <i>Kabuli</i>    | Ca_Kabuli_Chr03              | 27194069                       | (T/C)       |
| 4181        | CakSNP4181     | <i>Kabuli</i>    | Ca_Kabuli_Chr03              | 27338521                       | (T/C)       |
| 4182        | CakSNP4182     | <i>Kabuli</i>    | Ca_Kabuli_Chr03              | 27342919                       | (G/A)       |
| 4183        | CakSNP4183     | <i>Kabuli</i>    | Ca_Kabuli_Chr03              | 27391199                       | (G/A)       |
| 4184        | CakSNP4184     | <i>Kabuli</i>    | Ca_Kabuli_Chr03              | 27391354                       | (G/A)       |
| 4185        | CakSNP4185     | <i>Kabuli</i>    | Ca_Kabuli_Chr03              | 27391321                       | (A/G)       |
| 4186        | CakSNP4186     | <i>Kabuli</i>    | Ca_Kabuli_Chr03              | 27417561                       | (A/T)       |
| 4187        | CakSNP4187     | <i>Kabuli</i>    | Ca_Kabuli_Chr03              | 27420276                       | (T/C)       |
| 4188        | CakSNP4188     | <i>Kabuli</i>    | Ca_Kabuli_Chr03              | 27420330                       | (C/T)       |
| 4189        | CakSNP4189     | <i>Kabuli</i>    | Ca_Kabuli_Chr03              | 27435210                       | (T/C)       |
| 4190        | CakSNP4190     | <i>Kabuli</i>    | Ca_Kabuli_Chr03              | 27435209                       | (G/C)       |
| 4191        | CakSNP4191     | <i>Kabuli</i>    | Ca_Kabuli_Chr03              | 27435198                       | (T/A)       |
| 4192        | CakSNP4192     | <i>Kabuli</i>    | Ca_Kabuli_Chr03              | 27447685                       | (C/A)       |
| 4193        | CakSNP4193     | <i>Kabuli</i>    | Ca_Kabuli_Chr03              | 27470443                       | (A/C)       |
| 4194        | CakSNP4194     | <i>Kabuli</i>    | Ca_Kabuli_Chr03              | 27470439                       | (G/T)       |
| 4195        | CakSNP4195     | <i>Kabuli</i>    | Ca_Kabuli_Chr03              | 27597331                       | (A/C)       |
| 4196        | CakSNP4196     | <i>Kabuli</i>    | Ca_Kabuli_Chr03              | 27597409                       | (A/G)       |
| 4197        | CakSNP4197     | <i>Kabuli</i>    | Ca_Kabuli_Chr03              | 27632100                       | (G/A)       |
| 4198        | CakSNP4198     | <i>Kabuli</i>    | Ca_Kabuli_Chr03              | 27632169                       | (T/C)       |
| 4199        | CakSNP4199     | <i>Kabuli</i>    | Ca_Kabuli_Chr03              | 27654798                       | (A/C)       |
| 4200        | CakSNP4200     | <i>Kabuli</i>    | Ca_Kabuli_Chr03              | 27673727                       | (C/A)       |
| 4201        | CakSNP4201     | <i>Kabuli</i>    | Ca_Kabuli_Chr03              | 27681551                       | (T/C)       |
| 4202        | CakSNP4202     | <i>Kabuli</i>    | Ca_Kabuli_Chr03              | 27716396                       | (C/T)       |
| 4203        | CakSNP4203     | <i>Kabuli</i>    | Ca_Kabuli_Chr03              | 27763236                       | (C/T)       |
| 4204        | CakSNP4204     | <i>Kabuli</i>    | Ca_Kabuli_Chr03              | 27812571                       | (A/T)       |
| 4205        | CakSNP4205     | <i>Kabuli</i>    | Ca_Kabuli_Chr03              | 27876405                       | (A/G)       |
| 4206        | CakSNP4206     | <i>Kabuli</i>    | Ca_Kabuli_Chr03              | 27877442                       | (A/T)       |
| 4207        | CakSNP4207     | <i>Kabuli</i>    | Ca_Kabuli_Chr03              | 27877479                       | (C/T)       |
| 4208        | CakSNP4208     | <i>Kabuli</i>    | Ca_Kabuli_Chr03              | 27877480                       | (G/A)       |
| 4209        | CakSNP4209     | <i>Kabuli</i>    | Ca_Kabuli_Chr03              | 27877510                       | (G/A)       |
| 4210        | CakSNP4210     | <i>Kabuli</i>    | Ca_Kabuli_Chr03              | 27888817                       | (G/C)       |
| 4211        | CakSNP4211     | <i>Kabuli</i>    | Ca_Kabuli_Chr03              | 27889107                       | (A/G)       |
| 4212        | CakSNP4212     | <i>Kabuli</i>    | Ca_Kabuli_Chr03              | 27890849                       | (C/T)       |
| 4213        | CakSNP4213     | <i>Kabuli</i>    | Ca_Kabuli_Chr03              | 27905944                       | (T/C)       |
| 4214        | CakSNP4214     | <i>Kabuli</i>    | Ca_Kabuli_Chr03              | 27905989                       | (G/A)       |
| 4215        | CakSNP4215     | <i>Kabuli</i>    | Ca_Kabuli_Chr03              | 27905995                       | (C/T)       |
| 4216        | CakSNP4216     | <i>Kabuli</i>    | Ca_Kabuli_Chr03              | 27906069                       | (C/A)       |
| 4217        | CakSNP4217     | <i>Kabuli</i>    | Ca_Kabuli_Chr03              | 27914409                       | (C/T)       |

| <b>S.N.</b> | <b>SNP IDs</b> | <b>Cultivars</b> | <b>Chromosomes/scaffolds</b> | <b>Physical positions (bp)</b> | <b>SNPs</b> |
|-------------|----------------|------------------|------------------------------|--------------------------------|-------------|
| 4218        | CakSNP4218     | <i>Kabuli</i>    | Ca_Kabuli_Chr03              | 27968979                       | (T/G)       |
| 4219        | CakSNP4219     | <i>Kabuli</i>    | Ca_Kabuli_Chr03              | 27969014                       | (T/C)       |
| 4220        | CakSNP4220     | <i>Kabuli</i>    | Ca_Kabuli_Chr03              | 27969005                       | (A/G)       |
| 4221        | CakSNP4221     | <i>Kabuli</i>    | Ca_Kabuli_Chr03              | 27969207                       | (C/T)       |
| 4222        | CakSNP4222     | <i>Kabuli</i>    | Ca_Kabuli_Chr03              | 28044035                       | (A/T)       |
| 4223        | CakSNP4223     | <i>Kabuli</i>    | Ca_Kabuli_Chr03              | 28176380                       | (A/C)       |
| 4224        | CakSNP4224     | <i>Kabuli</i>    | Ca_Kabuli_Chr03              | 28176333                       | (C/A)       |
| 4225        | CakSNP4225     | <i>Kabuli</i>    | Ca_Kabuli_Chr03              | 28277991                       | (C/G)       |
| 4226        | CakSNP4226     | <i>Kabuli</i>    | Ca_Kabuli_Chr03              | 28278018                       | (C/G)       |
| 4227        | CakSNP4227     | <i>Kabuli</i>    | Ca_Kabuli_Chr03              | 28374024                       | (C/T)       |
| 4228        | CakSNP4228     | <i>Kabuli</i>    | Ca_Kabuli_Chr03              | 28375082                       | (G/A)       |
| 4229        | CakSNP4229     | <i>Kabuli</i>    | Ca_Kabuli_Chr03              | 28409001                       | (G/A)       |
| 4230        | CakSNP4230     | <i>Kabuli</i>    | Ca_Kabuli_Chr03              | 28420948                       | (C/T)       |
| 4231        | CakSNP4231     | <i>Kabuli</i>    | Ca_Kabuli_Chr03              | 28478044                       | (C/T)       |
| 4232        | CakSNP4232     | <i>Kabuli</i>    | Ca_Kabuli_Chr03              | 28478539                       | (C/G)       |
| 4233        | CakSNP4233     | <i>Kabuli</i>    | Ca_Kabuli_Chr03              | 28478569                       | (C/A)       |
| 4234        | CakSNP4234     | <i>Kabuli</i>    | Ca_Kabuli_Chr03              | 28602055                       | (C/A)       |
| 4235        | CakSNP4235     | <i>Kabuli</i>    | Ca_Kabuli_Chr03              | 28603892                       | (T/C)       |
| 4236        | CakSNP4236     | <i>Kabuli</i>    | Ca_Kabuli_Chr03              | 28613067                       | (A/G)       |
| 4237        | CakSNP4237     | <i>Kabuli</i>    | Ca_Kabuli_Chr03              | 28614784                       | (A/G)       |
| 4238        | CakSNP4238     | <i>Kabuli</i>    | Ca_Kabuli_Chr03              | 28614919                       | (A/T)       |
| 4239        | CakSNP4239     | <i>Kabuli</i>    | Ca_Kabuli_Chr03              | 28680858                       | (C/T)       |
| 4240        | CakSNP4240     | <i>Kabuli</i>    | Ca_Kabuli_Chr03              | 28706106                       | (T/A)       |
| 4241        | CakSNP4241     | <i>Kabuli</i>    | Ca_Kabuli_Chr03              | 28706292                       | (G/C)       |
| 4242        | CakSNP4242     | <i>Kabuli</i>    | Ca_Kabuli_Chr03              | 28712993                       | (T/C)       |
| 4243        | CakSNP4243     | <i>Kabuli</i>    | Ca_Kabuli_Chr03              | 28716003                       | (C/T)       |
| 4244        | CakSNP4244     | <i>Kabuli</i>    | Ca_Kabuli_Chr03              | 28716027                       | (A/T)       |
| 4245        | CakSNP4245     | <i>Kabuli</i>    | Ca_Kabuli_Chr03              | 28716028                       | (A/T)       |
| 4246        | CakSNP4246     | <i>Kabuli</i>    | Ca_Kabuli_Chr03              | 28716029                       | (A/G)       |
| 4247        | CakSNP4247     | <i>Kabuli</i>    | Ca_Kabuli_Chr03              | 28716038                       | (T/G)       |
| 4248        | CakSNP4248     | <i>Kabuli</i>    | Ca_Kabuli_Chr03              | 28716047                       | (G/A)       |
| 4249        | CakSNP4249     | <i>Kabuli</i>    | Ca_Kabuli_Chr03              | 28755111                       | (A/G)       |
| 4250        | CakSNP4250     | <i>Kabuli</i>    | Ca_Kabuli_Chr03              | 28755149                       | (G/A)       |
| 4251        | CakSNP4251     | <i>Kabuli</i>    | Ca_Kabuli_Chr03              | 28845958                       | (A/C)       |
| 4252        | CakSNP4252     | <i>Kabuli</i>    | Ca_Kabuli_Chr03              | 28926094                       | (T/A)       |
| 4253        | CakSNP4253     | <i>Kabuli</i>    | Ca_Kabuli_Chr03              | 28926290                       | (T/C)       |
| 4254        | CakSNP4254     | <i>Kabuli</i>    | Ca_Kabuli_Chr03              | 28934196                       | (C/T)       |
| 4255        | CakSNP4255     | <i>Kabuli</i>    | Ca_Kabuli_Chr03              | 28943956                       | (C/T)       |

| <b>S.N.</b> | <b>SNP IDs</b> | <b>Cultivars</b> | <b>Chromosomes/scaffolds</b> | <b>Physical positions (bp)</b> | <b>SNPs</b> |
|-------------|----------------|------------------|------------------------------|--------------------------------|-------------|
| 4256        | CakSNP4256     | <i>Kabuli</i>    | Ca_Kabuli_Chr03              | 28943989                       | (G/T)       |
| 4257        | CakSNP4257     | <i>Kabuli</i>    | Ca_Kabuli_Chr03              | 29056451                       | (T/C)       |
| 4258        | CakSNP4258     | <i>Kabuli</i>    | Ca_Kabuli_Chr03              | 29056528                       | (G/T)       |
| 4259        | CakSNP4259     | <i>Kabuli</i>    | Ca_Kabuli_Chr03              | 29056768                       | (T/C)       |
| 4260        | CakSNP4260     | <i>Kabuli</i>    | Ca_Kabuli_Chr03              | 29107776                       | (A/G)       |
| 4261        | CakSNP4261     | <i>Kabuli</i>    | Ca_Kabuli_Chr03              | 29107947                       | (C/A)       |
| 4262        | CakSNP4262     | <i>Kabuli</i>    | Ca_Kabuli_Chr03              | 29155741                       | (C/G)       |
| 4263        | CakSNP4263     | <i>Kabuli</i>    | Ca_Kabuli_Chr03              | 29177885                       | (A/C)       |
| 4264        | CakSNP4264     | <i>Kabuli</i>    | Ca_Kabuli_Chr03              | 29188300                       | (T/G)       |
| 4265        | CakSNP4265     | <i>Kabuli</i>    | Ca_Kabuli_Chr03              | 29188308                       | (G/A)       |
| 4266        | CakSNP4266     | <i>Kabuli</i>    | Ca_Kabuli_Chr03              | 29207338                       | (G/A)       |
| 4267        | CakSNP4267     | <i>Kabuli</i>    | Ca_Kabuli_Chr03              | 29293770                       | (G/T)       |
| 4268        | CakSNP4268     | <i>Kabuli</i>    | Ca_Kabuli_Chr03              | 29293783                       | (G/A)       |
| 4269        | CakSNP4269     | <i>Kabuli</i>    | Ca_Kabuli_Chr03              | 29293840                       | (C/A)       |
| 4270        | CakSNP4270     | <i>Kabuli</i>    | Ca_Kabuli_Chr03              | 29302251                       | (C/T)       |
| 4271        | CakSNP4271     | <i>Kabuli</i>    | Ca_Kabuli_Chr03              | 29302448                       | (A/C)       |
| 4272        | CakSNP4272     | <i>Kabuli</i>    | Ca_Kabuli_Chr03              | 29303144                       | (A/C)       |
| 4273        | CakSNP4273     | <i>Kabuli</i>    | Ca_Kabuli_Chr03              | 29304116                       | (A/G)       |
| 4274        | CakSNP4274     | <i>Kabuli</i>    | Ca_Kabuli_Chr03              | 29304161                       | (C/T)       |
| 4275        | CakSNP4275     | <i>Kabuli</i>    | Ca_Kabuli_Chr03              | 29311672                       | (C/A)       |
| 4276        | CakSNP4276     | <i>Kabuli</i>    | Ca_Kabuli_Chr03              | 29348267                       | (C/T)       |
| 4277        | CakSNP4277     | <i>Kabuli</i>    | Ca_Kabuli_Chr03              | 29355268                       | (T/A)       |
| 4278        | CakSNP4278     | <i>Kabuli</i>    | Ca_Kabuli_Chr03              | 29376025                       | (A/G)       |
| 4279        | CakSNP4279     | <i>Kabuli</i>    | Ca_Kabuli_Chr03              | 29376008                       | (G/A)       |
| 4280        | CakSNP4280     | <i>Kabuli</i>    | Ca_Kabuli_Chr03              | 29439505                       | (A/G)       |
| 4281        | CakSNP4281     | <i>Kabuli</i>    | Ca_Kabuli_Chr03              | 29485590                       | (T/C)       |
| 4282        | CakSNP4282     | <i>Kabuli</i>    | Ca_Kabuli_Chr03              | 29485566                       | (T/A)       |
| 4283        | CakSNP4283     | <i>Kabuli</i>    | Ca_Kabuli_Chr03              | 29508831                       | (C/T)       |
| 4284        | CakSNP4284     | <i>Kabuli</i>    | Ca_Kabuli_Chr03              | 29509323                       | (G/A)       |
| 4285        | CakSNP4285     | <i>Kabuli</i>    | Ca_Kabuli_Chr03              | 29509310                       | (G/T)       |
| 4286        | CakSNP4286     | <i>Kabuli</i>    | Ca_Kabuli_Chr03              | 29547528                       | (G/A)       |
| 4287        | CakSNP4287     | <i>Kabuli</i>    | Ca_Kabuli_Chr03              | 29588940                       | (C/T)       |
| 4288        | CakSNP4288     | <i>Kabuli</i>    | Ca_Kabuli_Chr03              | 29588934                       | (T/C)       |
| 4289        | CakSNP4289     | <i>Kabuli</i>    | Ca_Kabuli_Chr03              | 29588930                       | (T/C)       |
| 4290        | CakSNP4290     | <i>Kabuli</i>    | Ca_Kabuli_Chr03              | 29591575                       | (T/G)       |
| 4291        | CakSNP4291     | <i>Kabuli</i>    | Ca_Kabuli_Chr03              | 29591613                       | (G/T)       |
| 4292        | CakSNP4292     | <i>Kabuli</i>    | Ca_Kabuli_Chr03              | 29603720                       | (T/C)       |
| 4293        | CakSNP4293     | <i>Kabuli</i>    | Ca_Kabuli_Chr03              | 29640075                       | (A/C)       |

| <b>S.N.</b> | <b>SNP IDs</b> | <b>Cultivars</b> | <b>Chromosomes/scaffolds</b> | <b>Physical positions (bp)</b> | <b>SNPs</b> |
|-------------|----------------|------------------|------------------------------|--------------------------------|-------------|
| 4294        | CakSNP4294     | <i>Kabuli</i>    | Ca_Kabuli_Chr03              | 29640071                       | (T/C)       |
| 4295        | CakSNP4295     | <i>Kabuli</i>    | Ca_Kabuli_Chr03              | 29666633                       | (C/T)       |
| 4296        | CakSNP4296     | <i>Kabuli</i>    | Ca_Kabuli_Chr03              | 29690732                       | (C/A)       |
| 4297        | CakSNP4297     | <i>Kabuli</i>    | Ca_Kabuli_Chr03              | 29698166                       | (G/T)       |
| 4298        | CakSNP4298     | <i>Kabuli</i>    | Ca_Kabuli_Chr03              | 29698245                       | (T/A)       |
| 4299        | CakSNP4299     | <i>Kabuli</i>    | Ca_Kabuli_Chr03              | 29698289                       | (G/A)       |
| 4300        | CakSNP4300     | <i>Kabuli</i>    | Ca_Kabuli_Chr03              | 29698273                       | (A/C)       |
| 4301        | CakSNP4301     | <i>Kabuli</i>    | Ca_Kabuli_Chr03              | 29730019                       | (G/T)       |
| 4302        | CakSNP4302     | <i>Kabuli</i>    | Ca_Kabuli_Chr03              | 29744878                       | (T/G)       |
| 4303        | CakSNP4303     | <i>Kabuli</i>    | Ca_Kabuli_Chr03              | 29744890                       | (A/C)       |
| 4304        | CakSNP4304     | <i>Kabuli</i>    | Ca_Kabuli_Chr03              | 29803866                       | (C/T)       |
| 4305        | CakSNP4305     | <i>Kabuli</i>    | Ca_Kabuli_Chr03              | 29803962                       | (A/G)       |
| 4306        | CakSNP4306     | <i>Kabuli</i>    | Ca_Kabuli_Chr03              | 29807091                       | (C/G)       |
| 4307        | CakSNP4307     | <i>Kabuli</i>    | Ca_Kabuli_Chr03              | 29807248                       | (A/G)       |
| 4308        | CakSNP4308     | <i>Kabuli</i>    | Ca_Kabuli_Chr03              | 29836337                       | (C/A)       |
| 4309        | CakSNP4309     | <i>Kabuli</i>    | Ca_Kabuli_Chr03              | 29840029                       | (C/G)       |
| 4310        | CakSNP4310     | <i>Kabuli</i>    | Ca_Kabuli_Chr03              | 29840028                       | (T/C)       |
| 4311        | CakSNP4311     | <i>Kabuli</i>    | Ca_Kabuli_Chr03              | 29840022                       | (C/A)       |
| 4312        | CakSNP4312     | <i>Kabuli</i>    | Ca_Kabuli_Chr03              | 29840012                       | (A/T)       |
| 4313        | CakSNP4313     | <i>Kabuli</i>    | Ca_Kabuli_Chr03              | 29844509                       | (T/A)       |
| 4314        | CakSNP4314     | <i>Kabuli</i>    | Ca_Kabuli_Chr03              | 29869190                       | (G/T)       |
| 4315        | CakSNP4315     | <i>Kabuli</i>    | Ca_Kabuli_Chr03              | 29869199                       | (T/C)       |
| 4316        | CakSNP4316     | <i>Kabuli</i>    | Ca_Kabuli_Chr03              | 29869428                       | (G/T)       |
| 4317        | CakSNP4317     | <i>Kabuli</i>    | Ca_Kabuli_Chr03              | 29869381                       | (G/A)       |
| 4318        | CakSNP4318     | <i>Kabuli</i>    | Ca_Kabuli_Chr03              | 29869380                       | (G/A)       |
| 4319        | CakSNP4319     | <i>Kabuli</i>    | Ca_Kabuli_Chr03              | 29872643                       | (A/G)       |
| 4320        | CakSNP4320     | <i>Kabuli</i>    | Ca_Kabuli_Chr03              | 29872682                       | (G/A)       |
| 4321        | CakSNP4321     | <i>Kabuli</i>    | Ca_Kabuli_Chr03              | 29898396                       | (A/G)       |
| 4322        | CakSNP4322     | <i>Kabuli</i>    | Ca_Kabuli_Chr03              | 29912488                       | (A/G)       |
| 4323        | CakSNP4323     | <i>Kabuli</i>    | Ca_Kabuli_Chr03              | 29915510                       | (G/A)       |
| 4324        | CakSNP4324     | <i>Kabuli</i>    | Ca_Kabuli_Chr03              | 29932378                       | (C/G)       |
| 4325        | CakSNP4325     | <i>Kabuli</i>    | Ca_Kabuli_Chr03              | 29932504                       | (T/A)       |
| 4326        | CakSNP4326     | <i>Kabuli</i>    | Ca_Kabuli_Chr03              | 29932502                       | (G/C)       |
| 4327        | CakSNP4327     | <i>Kabuli</i>    | Ca_Kabuli_Chr03              | 29954498                       | (G/A)       |
| 4328        | CakSNP4328     | <i>Kabuli</i>    | Ca_Kabuli_Chr03              | 29954533                       | (A/G)       |
| 4329        | CakSNP4329     | <i>Kabuli</i>    | Ca_Kabuli_Chr03              | 29954648                       | (A/T)       |
| 4330        | CakSNP4330     | <i>Kabuli</i>    | Ca_Kabuli_Chr03              | 29954612                       | (T/G)       |
| 4331        | CakSNP4331     | <i>Kabuli</i>    | Ca_Kabuli_Chr03              | 29974532                       | (A/G)       |

| <b>S.N.</b> | <b>SNP IDs</b> | <b>Cultivars</b> | <b>Chromosomes/scaffolds</b> | <b>Physical positions (bp)</b> | <b>SNPs</b> |
|-------------|----------------|------------------|------------------------------|--------------------------------|-------------|
| 4332        | CakSNP4332     | <i>Kabuli</i>    | Ca_Kabuli_Chr03              | 29974535                       | (A/G)       |
| 4333        | CakSNP4333     | <i>Kabuli</i>    | Ca_Kabuli_Chr03              | 29974595                       | (C/T)       |
| 4334        | CakSNP4334     | <i>Kabuli</i>    | Ca_Kabuli_Chr03              | 29982638                       | (A/G)       |
| 4335        | CakSNP4335     | <i>Kabuli</i>    | Ca_Kabuli_Chr03              | 29982644                       | (T/C)       |
| 4336        | CakSNP4336     | <i>Kabuli</i>    | Ca_Kabuli_Chr03              | 29982718                       | (C/A)       |
| 4337        | CakSNP4337     | <i>Kabuli</i>    | Ca_Kabuli_Chr03              | 30004352                       | (T/A)       |
| 4338        | CakSNP4338     | <i>Kabuli</i>    | Ca_Kabuli_Chr03              | 30004311                       | (T/G)       |
| 4339        | CakSNP4339     | <i>Kabuli</i>    | Ca_Kabuli_Chr03              | 30004295                       | (A/G)       |
| 4340        | CakSNP4340     | <i>Kabuli</i>    | Ca_Kabuli_Chr03              | 30004279                       | (G/T)       |
| 4341        | CakSNP4341     | <i>Kabuli</i>    | Ca_Kabuli_Chr03              | 30009698                       | (C/T)       |
| 4342        | CakSNP4342     | <i>Kabuli</i>    | Ca_Kabuli_Chr03              | 30009751                       | (A/C)       |
| 4343        | CakSNP4343     | <i>Kabuli</i>    | Ca_Kabuli_Chr03              | 30011584                       | (T/C)       |
| 4344        | CakSNP4344     | <i>Kabuli</i>    | Ca_Kabuli_Chr03              | 30011669                       | (A/G)       |
| 4345        | CakSNP4345     | <i>Kabuli</i>    | Ca_Kabuli_Chr03              | 30011642                       | (T/A)       |
| 4346        | CakSNP4346     | <i>Kabuli</i>    | Ca_Kabuli_Chr03              | 30011621                       | (C/T)       |
| 4347        | CakSNP4347     | <i>Kabuli</i>    | Ca_Kabuli_Chr03              | 30029874                       | (C/T)       |
| 4348        | CakSNP4348     | <i>Kabuli</i>    | Ca_Kabuli_Chr03              | 30029858                       | (T/A)       |
| 4349        | CakSNP4349     | <i>Kabuli</i>    | Ca_Kabuli_Chr03              | 30029842                       | (G/C)       |
| 4350        | CakSNP4350     | <i>Kabuli</i>    | Ca_Kabuli_Chr03              | 30029826                       | (T/C)       |
| 4351        | CakSNP4351     | <i>Kabuli</i>    | Ca_Kabuli_Chr03              | 30029817                       | (T/G)       |
| 4352        | CakSNP4352     | <i>Kabuli</i>    | Ca_Kabuli_Chr03              | 30084154                       | (T/C)       |
| 4353        | CakSNP4353     | <i>Kabuli</i>    | Ca_Kabuli_Chr03              | 30101412                       | (T/C)       |
| 4354        | CakSNP4354     | <i>Kabuli</i>    | Ca_Kabuli_Chr03              | 30101476                       | (A/C)       |
| 4355        | CakSNP4355     | <i>Kabuli</i>    | Ca_Kabuli_Chr03              | 30111154                       | (A/C)       |
| 4356        | CakSNP4356     | <i>Kabuli</i>    | Ca_Kabuli_Chr03              | 30111146                       | (G/C)       |
| 4357        | CakSNP4357     | <i>Kabuli</i>    | Ca_Kabuli_Chr03              | 30148907                       | (T/C)       |
| 4358        | CakSNP4358     | <i>Kabuli</i>    | Ca_Kabuli_Chr03              | 30194810                       | (C/T)       |
| 4359        | CakSNP4359     | <i>Kabuli</i>    | Ca_Kabuli_Chr03              | 30206121                       | (T/A)       |
| 4360        | CakSNP4360     | <i>Kabuli</i>    | Ca_Kabuli_Chr03              | 30206266                       | (G/A)       |
| 4361        | CakSNP4361     | <i>Kabuli</i>    | Ca_Kabuli_Chr03              | 30206281                       | (A/T)       |
| 4362        | CakSNP4362     | <i>Kabuli</i>    | Ca_Kabuli_Chr03              | 30206436                       | (G/A)       |
| 4363        | CakSNP4363     | <i>Kabuli</i>    | Ca_Kabuli_Chr03              | 30267761                       | (T/G)       |
| 4364        | CakSNP4364     | <i>Kabuli</i>    | Ca_Kabuli_Chr03              | 30271022                       | (G/T)       |
| 4365        | CakSNP4365     | <i>Kabuli</i>    | Ca_Kabuli_Chr03              | 30271028                       | (G/A)       |
| 4366        | CakSNP4366     | <i>Kabuli</i>    | Ca_Kabuli_Chr03              | 30271034                       | (G/A)       |
| 4367        | CakSNP4367     | <i>Kabuli</i>    | Ca_Kabuli_Chr03              | 30309625                       | (G/C)       |
| 4368        | CakSNP4368     | <i>Kabuli</i>    | Ca_Kabuli_Chr03              | 30309624                       | (A/T)       |
| 4369        | CakSNP4369     | <i>Kabuli</i>    | Ca_Kabuli_Chr03              | 30321177                       | (C/G)       |

| <b>S.N.</b> | <b>SNP IDs</b> | <b>Cultivars</b> | <b>Chromosomes/scaffolds</b> | <b>Physical positions (bp)</b> | <b>SNPs</b> |
|-------------|----------------|------------------|------------------------------|--------------------------------|-------------|
| 4370        | CakSNP4370     | <i>Kabuli</i>    | Ca_Kabuli_Chr03              | 30321245                       | (C/T)       |
| 4371        | CakSNP4371     | <i>Kabuli</i>    | Ca_Kabuli_Chr03              | 30321272                       | (C/A)       |
| 4372        | CakSNP4372     | <i>Kabuli</i>    | Ca_Kabuli_Chr03              | 30323585                       | (G/A)       |
| 4373        | CakSNP4373     | <i>Kabuli</i>    | Ca_Kabuli_Chr03              | 30376319                       | (G/A)       |
| 4374        | CakSNP4374     | <i>Kabuli</i>    | Ca_Kabuli_Chr03              | 30385144                       | (G/A)       |
| 4375        | CakSNP4375     | <i>Kabuli</i>    | Ca_Kabuli_Chr03              | 30385153                       | (T/A)       |
| 4376        | CakSNP4376     | <i>Kabuli</i>    | Ca_Kabuli_Chr03              | 30390663                       | (C/T)       |
| 4377        | CakSNP4377     | <i>Kabuli</i>    | Ca_Kabuli_Chr03              | 30397262                       | (A/T)       |
| 4378        | CakSNP4378     | <i>Kabuli</i>    | Ca_Kabuli_Chr03              | 30425496                       | (G/T)       |
| 4379        | CakSNP4379     | <i>Kabuli</i>    | Ca_Kabuli_Chr03              | 30510392                       | (T/A)       |
| 4380        | CakSNP4380     | <i>Kabuli</i>    | Ca_Kabuli_Chr03              | 30510333                       | (C/T)       |
| 4381        | CakSNP4381     | <i>Kabuli</i>    | Ca_Kabuli_Chr03              | 30522442                       | (A/C)       |
| 4382        | CakSNP4382     | <i>Kabuli</i>    | Ca_Kabuli_Chr03              | 30522485                       | (C/T)       |
| 4383        | CakSNP4383     | <i>Kabuli</i>    | Ca_Kabuli_Chr03              | 30522498                       | (T/C)       |
| 4384        | CakSNP4384     | <i>Kabuli</i>    | Ca_Kabuli_Chr03              | 30650598                       | (C/A)       |
| 4385        | CakSNP4385     | <i>Kabuli</i>    | Ca_Kabuli_Chr03              | 30650634                       | (T/C)       |
| 4386        | CakSNP4386     | <i>Kabuli</i>    | Ca_Kabuli_Chr03              | 30650659                       | (C/T)       |
| 4387        | CakSNP4387     | <i>Kabuli</i>    | Ca_Kabuli_Chr03              | 30659438                       | (T/A)       |
| 4388        | CakSNP4388     | <i>Kabuli</i>    | Ca_Kabuli_Chr03              | 30675468                       | (T/G)       |
| 4389        | CakSNP4389     | <i>Kabuli</i>    | Ca_Kabuli_Chr03              | 30681031                       | (A/G)       |
| 4390        | CakSNP4390     | <i>Kabuli</i>    | Ca_Kabuli_Chr03              | 30681032                       | (A/G)       |
| 4391        | CakSNP4391     | <i>Kabuli</i>    | Ca_Kabuli_Chr03              | 30688336                       | (T/G)       |
| 4392        | CakSNP4392     | <i>Kabuli</i>    | Ca_Kabuli_Chr03              | 30688354                       | (G/A)       |
| 4393        | CakSNP4393     | <i>Kabuli</i>    | Ca_Kabuli_Chr03              | 30688369                       | (T/C)       |
| 4394        | CakSNP4394     | <i>Kabuli</i>    | Ca_Kabuli_Chr03              | 30688418                       | (A/C)       |
| 4395        | CakSNP4395     | <i>Kabuli</i>    | Ca_Kabuli_Chr03              | 30688511                       | (G/C)       |
| 4396        | CakSNP4396     | <i>Kabuli</i>    | Ca_Kabuli_Chr03              | 30688485                       | (C/A)       |
| 4397        | CakSNP4397     | <i>Kabuli</i>    | Ca_Kabuli_Chr03              | 30688484                       | (A/C)       |
| 4398        | CakSNP4398     | <i>Kabuli</i>    | Ca_Kabuli_Chr03              | 30688454                       | (A/G)       |
| 4399        | CakSNP4399     | <i>Kabuli</i>    | Ca_Kabuli_Chr03              | 30688451                       | (T/C)       |
| 4400        | CakSNP4400     | <i>Kabuli</i>    | Ca_Kabuli_Chr03              | 30718334                       | (G/T)       |
| 4401        | CakSNP4401     | <i>Kabuli</i>    | Ca_Kabuli_Chr03              | 30751893                       | (A/C)       |
| 4402        | CakSNP4402     | <i>Kabuli</i>    | Ca_Kabuli_Chr03              | 30751949                       | (A/T)       |
| 4403        | CakSNP4403     | <i>Kabuli</i>    | Ca_Kabuli_Chr03              | 30791169                       | (A/T)       |
| 4404        | CakSNP4404     | <i>Kabuli</i>    | Ca_Kabuli_Chr03              | 30791229                       | (G/A)       |
| 4405        | CakSNP4405     | <i>Kabuli</i>    | Ca_Kabuli_Chr03              | 30791693                       | (C/T)       |
| 4406        | CakSNP4406     | <i>Kabuli</i>    | Ca_Kabuli_Chr03              | 30794040                       | (C/A)       |
| 4407        | CakSNP4407     | <i>Kabuli</i>    | Ca_Kabuli_Chr03              | 30794046                       | (A/C)       |

| <b>S.N.</b> | <b>SNP IDs</b> | <b>Cultivars</b> | <b>Chromosomes/scaffolds</b> | <b>Physical positions (bp)</b> | <b>SNPs</b> |
|-------------|----------------|------------------|------------------------------|--------------------------------|-------------|
| 4408        | CakSNP4408     | <i>Kabuli</i>    | Ca_Kabuli_Chr03              | 30837147                       | (A/G)       |
| 4409        | CakSNP4409     | <i>Kabuli</i>    | Ca_Kabuli_Chr03              | 30837284                       | (C/T)       |
| 4410        | CakSNP4410     | <i>Kabuli</i>    | Ca_Kabuli_Chr03              | 30837265                       | (T/C)       |
| 4411        | CakSNP4411     | <i>Kabuli</i>    | Ca_Kabuli_Chr03              | 30880452                       | (T/C)       |
| 4412        | CakSNP4412     | <i>Kabuli</i>    | Ca_Kabuli_Chr03              | 30880610                       | (A/G)       |
| 4413        | CakSNP4413     | <i>Kabuli</i>    | Ca_Kabuli_Chr03              | 31020357                       | (C/A)       |
| 4414        | CakSNP4414     | <i>Kabuli</i>    | Ca_Kabuli_Chr03              | 31020358                       | (C/G)       |
| 4415        | CakSNP4415     | <i>Kabuli</i>    | Ca_Kabuli_Chr03              | 31073396                       | (T/C)       |
| 4416        | CakSNP4416     | <i>Kabuli</i>    | Ca_Kabuli_Chr03              | 31073425                       | (G/C)       |
| 4417        | CakSNP4417     | <i>Kabuli</i>    | Ca_Kabuli_Chr03              | 31073451                       | (A/G)       |
| 4418        | CakSNP4418     | <i>Kabuli</i>    | Ca_Kabuli_Chr03              | 31091875                       | (T/G)       |
| 4419        | CakSNP4419     | <i>Kabuli</i>    | Ca_Kabuli_Chr03              | 31267639                       | (T/A)       |
| 4420        | CakSNP4420     | <i>Kabuli</i>    | Ca_Kabuli_Chr03              | 31267675                       | (A/G)       |
| 4421        | CakSNP4421     | <i>Kabuli</i>    | Ca_Kabuli_Chr03              | 31267681                       | (G/A)       |
| 4422        | CakSNP4422     | <i>Kabuli</i>    | Ca_Kabuli_Chr03              | 31267828                       | (A/G)       |
| 4423        | CakSNP4423     | <i>Kabuli</i>    | Ca_Kabuli_Chr03              | 31267927                       | (T/G)       |
| 4424        | CakSNP4424     | <i>Kabuli</i>    | Ca_Kabuli_Chr03              | 31268143                       | (A/G)       |
| 4425        | CakSNP4425     | <i>Kabuli</i>    | Ca_Kabuli_Chr03              | 31279502                       | (C/T)       |
| 4426        | CakSNP4426     | <i>Kabuli</i>    | Ca_Kabuli_Chr03              | 31279541                       | (A/G)       |
| 4427        | CakSNP4427     | <i>Kabuli</i>    | Ca_Kabuli_Chr03              | 31279639                       | (C/T)       |
| 4428        | CakSNP4428     | <i>Kabuli</i>    | Ca_Kabuli_Chr03              | 31279629                       | (C/G)       |
| 4429        | CakSNP4429     | <i>Kabuli</i>    | Ca_Kabuli_Chr03              | 31279628                       | (T/C)       |
| 4430        | CakSNP4430     | <i>Kabuli</i>    | Ca_Kabuli_Chr03              | 31279616                       | (T/A)       |
| 4431        | CakSNP4431     | <i>Kabuli</i>    | Ca_Kabuli_Chr03              | 31279606                       | (G/A)       |
| 4432        | CakSNP4432     | <i>Kabuli</i>    | Ca_Kabuli_Chr03              | 31279605                       | (G/A)       |
| 4433        | CakSNP4433     | <i>Kabuli</i>    | Ca_Kabuli_Chr03              | 31279604                       | (C/G)       |
| 4434        | CakSNP4434     | <i>Kabuli</i>    | Ca_Kabuli_Chr03              | 31279600                       | (T/C)       |
| 4435        | CakSNP4435     | <i>Kabuli</i>    | Ca_Kabuli_Chr03              | 31279586                       | (A/G)       |
| 4436        | CakSNP4436     | <i>Kabuli</i>    | Ca_Kabuli_Chr03              | 31287618                       | (C/A)       |
| 4437        | CakSNP4437     | <i>Kabuli</i>    | Ca_Kabuli_Chr03              | 31287909                       | (A/G)       |
| 4438        | CakSNP4438     | <i>Kabuli</i>    | Ca_Kabuli_Chr03              | 31288143                       | (T/C)       |
| 4439        | CakSNP4439     | <i>Kabuli</i>    | Ca_Kabuli_Chr03              | 31301723                       | (G/A)       |
| 4440        | CakSNP4440     | <i>Kabuli</i>    | Ca_Kabuli_Chr03              | 31301783                       | (A/G)       |
| 4441        | CakSNP4441     | <i>Kabuli</i>    | Ca_Kabuli_Chr03              | 31302060                       | (T/C)       |
| 4442        | CakSNP4442     | <i>Kabuli</i>    | Ca_Kabuli_Chr03              | 31302117                       | (C/T)       |
| 4443        | CakSNP4443     | <i>Kabuli</i>    | Ca_Kabuli_Chr03              | 31313021                       | (G/T)       |
| 4444        | CakSNP4444     | <i>Kabuli</i>    | Ca_Kabuli_Chr03              | 31317521                       | (T/G)       |
| 4445        | CakSNP4445     | <i>Kabuli</i>    | Ca_Kabuli_Chr03              | 31321725                       | (A/G)       |

| <b>S.N.</b> | <b>SNP IDs</b> | <b>Cultivars</b> | <b>Chromosomes/scaffolds</b> | <b>Physical positions (bp)</b> | <b>SNPs</b> |
|-------------|----------------|------------------|------------------------------|--------------------------------|-------------|
| 4446        | CakSNP4446     | <i>Kabuli</i>    | Ca_Kabuli_Chr03              | 31321778                       | (G/A)       |
| 4447        | CakSNP4447     | <i>Kabuli</i>    | Ca_Kabuli_Chr03              | 31321850                       | (A/G)       |
| 4448        | CakSNP4448     | <i>Kabuli</i>    | Ca_Kabuli_Chr03              | 31341335                       | (C/T)       |
| 4449        | CakSNP4449     | <i>Kabuli</i>    | Ca_Kabuli_Chr03              | 31341323                       | (T/C)       |
| 4450        | CakSNP4450     | <i>Kabuli</i>    | Ca_Kabuli_Chr03              | 31342119                       | (A/T)       |
| 4451        | CakSNP4451     | <i>Kabuli</i>    | Ca_Kabuli_Chr03              | 31354988                       | (G/C)       |
| 4452        | CakSNP4452     | <i>Kabuli</i>    | Ca_Kabuli_Chr03              | 31355001                       | (C/T)       |
| 4453        | CakSNP4453     | <i>Kabuli</i>    | Ca_Kabuli_Chr03              | 31355026                       | (T/C)       |
| 4454        | CakSNP4454     | <i>Kabuli</i>    | Ca_Kabuli_Chr03              | 31355066                       | (A/T)       |
| 4455        | CakSNP4455     | <i>Kabuli</i>    | Ca_Kabuli_Chr03              | 31357787                       | (A/T)       |
| 4456        | CakSNP4456     | <i>Kabuli</i>    | Ca_Kabuli_Chr03              | 31431216                       | (C/T)       |
| 4457        | CakSNP4457     | <i>Kabuli</i>    | Ca_Kabuli_Chr03              | 31478804                       | (T/C)       |
| 4458        | CakSNP4458     | <i>Kabuli</i>    | Ca_Kabuli_Chr03              | 31478882                       | (C/T)       |
| 4459        | CakSNP4459     | <i>Kabuli</i>    | Ca_Kabuli_Chr03              | 31480603                       | (T/C)       |
| 4460        | CakSNP4460     | <i>Kabuli</i>    | Ca_Kabuli_Chr03              | 31516662                       | (G/T)       |
| 4461        | CakSNP4461     | <i>Kabuli</i>    | Ca_Kabuli_Chr03              | 31516766                       | (T/C)       |
| 4462        | CakSNP4462     | <i>Kabuli</i>    | Ca_Kabuli_Chr03              | 31520119                       | (C/T)       |
| 4463        | CakSNP4463     | <i>Kabuli</i>    | Ca_Kabuli_Chr03              | 31520225                       | (A/T)       |
| 4464        | CakSNP4464     | <i>Kabuli</i>    | Ca_Kabuli_Chr03              | 31520198                       | (G/A)       |
| 4465        | CakSNP4465     | <i>Kabuli</i>    | Ca_Kabuli_Chr03              | 31520190                       | (T/C)       |
| 4466        | CakSNP4466     | <i>Kabuli</i>    | Ca_Kabuli_Chr03              | 31520832                       | (G/A)       |
| 4467        | CakSNP4467     | <i>Kabuli</i>    | Ca_Kabuli_Chr03              | 31521142                       | (T/C)       |
| 4468        | CakSNP4468     | <i>Kabuli</i>    | Ca_Kabuli_Chr03              | 31521155                       | (T/A)       |
| 4469        | CakSNP4469     | <i>Kabuli</i>    | Ca_Kabuli_Chr03              | 31589355                       | (A/G)       |
| 4470        | CakSNP4470     | <i>Kabuli</i>    | Ca_Kabuli_Chr03              | 31589329                       | (C/T)       |
| 4471        | CakSNP4471     | <i>Kabuli</i>    | Ca_Kabuli_Chr03              | 31591065                       | (G/A)       |
| 4472        | CakSNP4472     | <i>Kabuli</i>    | Ca_Kabuli_Chr03              | 31606359                       | (C/T)       |
| 4473        | CakSNP4473     | <i>Kabuli</i>    | Ca_Kabuli_Chr03              | 31630175                       | (T/A)       |
| 4474        | CakSNP4474     | <i>Kabuli</i>    | Ca_Kabuli_Chr03              | 31630178                       | (G/T)       |
| 4475        | CakSNP4475     | <i>Kabuli</i>    | Ca_Kabuli_Chr03              | 31630195                       | (T/C)       |
| 4476        | CakSNP4476     | <i>Kabuli</i>    | Ca_Kabuli_Chr03              | 31631451                       | (A/C)       |
| 4477        | CakSNP4477     | <i>Kabuli</i>    | Ca_Kabuli_Chr03              | 31631444                       | (T/G)       |
| 4478        | CakSNP4478     | <i>Kabuli</i>    | Ca_Kabuli_Chr03              | 31631561                       | (G/A)       |
| 4479        | CakSNP4479     | <i>Kabuli</i>    | Ca_Kabuli_Chr03              | 31631534                       | (A/G)       |
| 4480        | CakSNP4480     | <i>Kabuli</i>    | Ca_Kabuli_Chr03              | 31631622                       | (G/A)       |
| 4481        | CakSNP4481     | <i>Kabuli</i>    | Ca_Kabuli_Chr03              | 31631644                       | (A/C)       |
| 4482        | CakSNP4482     | <i>Kabuli</i>    | Ca_Kabuli_Chr03              | 31646735                       | (C/T)       |
| 4483        | CakSNP4483     | <i>Kabuli</i>    | Ca_Kabuli_Chr03              | 31646817                       | (C/T)       |



| <b>S.N.</b> | <b>SNP IDs</b> | <b>Cultivars</b> | <b>Chromosomes/scaffolds</b> | <b>Physical positions (bp)</b> | <b>SNPs</b> |
|-------------|----------------|------------------|------------------------------|--------------------------------|-------------|
| 4484        | CakSNP4484     | <i>Kabuli</i>    | Ca_Kabuli_Chr03              | 31646802                       | (G/A)       |
| 4485        | CakSNP4485     | <i>Kabuli</i>    | Ca_Kabuli_Chr03              | 31683906                       | (A/G)       |
| 4486        | CakSNP4486     | <i>Kabuli</i>    | Ca_Kabuli_Chr03              | 31689128                       | (C/T)       |
| 4487        | CakSNP4487     | <i>Kabuli</i>    | Ca_Kabuli_Chr03              | 31698493                       | (A/C)       |
| 4488        | CakSNP4488     | <i>Kabuli</i>    | Ca_Kabuli_Chr03              | 31766363                       | (G/A)       |
| 4489        | CakSNP4489     | <i>Kabuli</i>    | Ca_Kabuli_Chr03              | 31770365                       | (A/C)       |
| 4490        | CakSNP4490     | <i>Kabuli</i>    | Ca_Kabuli_Chr03              | 31771314                       | (C/A)       |
| 4491        | CakSNP4491     | <i>Kabuli</i>    | Ca_Kabuli_Chr03              | 31790189                       | (C/T)       |
| 4492        | CakSNP4492     | <i>Kabuli</i>    | Ca_Kabuli_Chr03              | 31790216                       | (G/A)       |
| 4493        | CakSNP4493     | <i>Kabuli</i>    | Ca_Kabuli_Chr03              | 31790239                       | (G/T)       |
| 4494        | CakSNP4494     | <i>Kabuli</i>    | Ca_Kabuli_Chr03              | 31790352                       | (G/A)       |
| 4495        | CakSNP4495     | <i>Kabuli</i>    | Ca_Kabuli_Chr03              | 31814300                       | (A/G)       |
| 4496        | CakSNP4496     | <i>Kabuli</i>    | Ca_Kabuli_Chr03              | 31852191                       | (T/C)       |
| 4497        | CakSNP4497     | <i>Kabuli</i>    | Ca_Kabuli_Chr03              | 31857877                       | (C/T)       |
| 4498        | CakSNP4498     | <i>Kabuli</i>    | Ca_Kabuli_Chr03              | 31859152                       | (C/G)       |
| 4499        | CakSNP4499     | <i>Kabuli</i>    | Ca_Kabuli_Chr03              | 31859251                       | (T/C)       |
| 4500        | CakSNP4500     | <i>Kabuli</i>    | Ca_Kabuli_Chr03              | 31926694                       | (C/G)       |
| 4501        | CakSNP4501     | <i>Kabuli</i>    | Ca_Kabuli_Chr03              | 31931014                       | (A/C)       |
| 4502        | CakSNP4502     | <i>Kabuli</i>    | Ca_Kabuli_Chr03              | 31945504                       | (C/T)       |
| 4503        | CakSNP4503     | <i>Kabuli</i>    | Ca_Kabuli_Chr03              | 31945634                       | (A/G)       |
| 4504        | CakSNP4504     | <i>Kabuli</i>    | Ca_Kabuli_Chr03              | 31951994                       | (G/A)       |
| 4505        | CakSNP4505     | <i>Kabuli</i>    | Ca_Kabuli_Chr03              | 31953466                       | (G/A)       |
| 4506        | CakSNP4506     | <i>Kabuli</i>    | Ca_Kabuli_Chr03              | 31953549                       | (C/T)       |
| 4507        | CakSNP4507     | <i>Kabuli</i>    | Ca_Kabuli_Chr03              | 32351052                       | (C/T)       |
| 4508        | CakSNP4508     | <i>Kabuli</i>    | Ca_Kabuli_Chr03              | 32351031                       | (G/C)       |
| 4509        | CakSNP4509     | <i>Kabuli</i>    | Ca_Kabuli_Chr03              | 32357599                       | (C/T)       |
| 4510        | CakSNP4510     | <i>Kabuli</i>    | Ca_Kabuli_Chr03              | 32357578                       | (G/C)       |
| 4511        | CakSNP4511     | <i>Kabuli</i>    | Ca_Kabuli_Chr03              | 32448959                       | (T/C)       |
| 4512        | CakSNP4512     | <i>Kabuli</i>    | Ca_Kabuli_Chr03              | 32449654                       | (T/G)       |
| 4513        | CakSNP4513     | <i>Kabuli</i>    | Ca_Kabuli_Chr03              | 32449700                       | (C/T)       |
| 4514        | CakSNP4514     | <i>Kabuli</i>    | Ca_Kabuli_Chr03              | 32510033                       | (T/G)       |
| 4515        | CakSNP4515     | <i>Kabuli</i>    | Ca_Kabuli_Chr03              | 32510090                       | (A/G)       |
| 4516        | CakSNP4516     | <i>Kabuli</i>    | Ca_Kabuli_Chr03              | 32510130                       | (A/G)       |
| 4517        | CakSNP4517     | <i>Kabuli</i>    | Ca_Kabuli_Chr03              | 32510124                       | (C/T)       |
| 4518        | CakSNP4518     | <i>Kabuli</i>    | Ca_Kabuli_Chr03              | 32510111                       | (C/T)       |
| 4519        | CakSNP4519     | <i>Kabuli</i>    | Ca_Kabuli_Chr03              | 32510071                       | (G/T)       |
| 4520        | CakSNP4520     | <i>Kabuli</i>    | Ca_Kabuli_Chr03              | 32510081                       | (C/T)       |
| 4521        | CakSNP4521     | <i>Kabuli</i>    | Ca_Kabuli_Chr03              | 32514908                       | (A/G)       |

| <b>S.N.</b> | <b>SNP IDs</b> | <b>Cultivars</b> | <b>Chromosomes/scaffolds</b> | <b>Physical positions (bp)</b> | <b>SNPs</b> |
|-------------|----------------|------------------|------------------------------|--------------------------------|-------------|
| 4522        | CakSNP4522     | <i>Kabuli</i>    | Ca_Kabuli_Chr03              | 32514890                       | (A/G)       |
| 4523        | CakSNP4523     | <i>Kabuli</i>    | Ca_Kabuli_Chr03              | 32514889                       | (C/T)       |
| 4524        | CakSNP4524     | <i>Kabuli</i>    | Ca_Kabuli_Chr03              | 32514869                       | (C/T)       |
| 4525        | CakSNP4525     | <i>Kabuli</i>    | Ca_Kabuli_Chr03              | 32514868                       | (A/G)       |
| 4526        | CakSNP4526     | <i>Kabuli</i>    | Ca_Kabuli_Chr03              | 32514867                       | (C/T)       |
| 4527        | CakSNP4527     | <i>Kabuli</i>    | Ca_Kabuli_Chr03              | 32514863                       | (G/C)       |
| 4528        | CakSNP4528     | <i>Kabuli</i>    | Ca_Kabuli_Chr03              | 32514859                       | (C/T)       |
| 4529        | CakSNP4529     | <i>Kabuli</i>    | Ca_Kabuli_Chr03              | 32514916                       | (G/C)       |
| 4530        | CakSNP4530     | <i>Kabuli</i>    | Ca_Kabuli_Chr03              | 32525128                       | (G/T)       |
| 4531        | CakSNP4531     | <i>Kabuli</i>    | Ca_Kabuli_Chr03              | 32557850                       | (C/T)       |
| 4532        | CakSNP4532     | <i>Kabuli</i>    | Ca_Kabuli_Chr03              | 32571237                       | (G/A)       |
| 4533        | CakSNP4533     | <i>Kabuli</i>    | Ca_Kabuli_Chr03              | 32571291                       | (A/G)       |
| 4534        | CakSNP4534     | <i>Kabuli</i>    | Ca_Kabuli_Chr03              | 32571275                       | (T/C)       |
| 4535        | CakSNP4535     | <i>Kabuli</i>    | Ca_Kabuli_Chr03              | 32600003                       | (A/G)       |
| 4536        | CakSNP4536     | <i>Kabuli</i>    | Ca_Kabuli_Chr03              | 32601732                       | (T/C)       |
| 4537        | CakSNP4537     | <i>Kabuli</i>    | Ca_Kabuli_Chr03              | 32608947                       | (A/G)       |
| 4538        | CakSNP4538     | <i>Kabuli</i>    | Ca_Kabuli_Chr03              | 32662861                       | (A/G)       |
| 4539        | CakSNP4539     | <i>Kabuli</i>    | Ca_Kabuli_Chr03              | 32662858                       | (A/G)       |
| 4540        | CakSNP4540     | <i>Kabuli</i>    | Ca_Kabuli_Chr03              | 32663015                       | (C/T)       |
| 4541        | CakSNP4541     | <i>Kabuli</i>    | Ca_Kabuli_Chr03              | 32663059                       | (A/C)       |
| 4542        | CakSNP4542     | <i>Kabuli</i>    | Ca_Kabuli_Chr03              | 32694509                       | (T/C)       |
| 4543        | CakSNP4543     | <i>Kabuli</i>    | Ca_Kabuli_Chr03              | 32694454                       | (T/C)       |
| 4544        | CakSNP4544     | <i>Kabuli</i>    | Ca_Kabuli_Chr03              | 32704734                       | (G/A)       |
| 4545        | CakSNP4545     | <i>Kabuli</i>    | Ca_Kabuli_Chr03              | 32704868                       | (G/T)       |
| 4546        | CakSNP4546     | <i>Kabuli</i>    | Ca_Kabuli_Chr03              | 32704953                       | (G/A)       |
| 4547        | CakSNP4547     | <i>Kabuli</i>    | Ca_Kabuli_Chr03              | 32706200                       | (C/T)       |
| 4548        | CakSNP4548     | <i>Kabuli</i>    | Ca_Kabuli_Chr03              | 32725039                       | (C/G)       |
| 4549        | CakSNP4549     | <i>Kabuli</i>    | Ca_Kabuli_Chr03              | 32725096                       | (A/T)       |
| 4550        | CakSNP4550     | <i>Kabuli</i>    | Ca_Kabuli_Chr03              | 32758259                       | (C/A)       |
| 4551        | CakSNP4551     | <i>Kabuli</i>    | Ca_Kabuli_Chr03              | 32758293                       | (T/C)       |
| 4552        | CakSNP4552     | <i>Kabuli</i>    | Ca_Kabuli_Chr03              | 32785228                       | (A/G)       |
| 4553        | CakSNP4553     | <i>Kabuli</i>    | Ca_Kabuli_Chr03              | 32827067                       | (C/G)       |
| 4554        | CakSNP4554     | <i>Kabuli</i>    | Ca_Kabuli_Chr03              | 32827065                       | (T/G)       |
| 4555        | CakSNP4555     | <i>Kabuli</i>    | Ca_Kabuli_Chr03              | 32845361                       | (A/G)       |
| 4556        | CakSNP4556     | <i>Kabuli</i>    | Ca_Kabuli_Chr03              | 32845395                       | (C/A)       |
| 4557        | CakSNP4557     | <i>Kabuli</i>    | Ca_Kabuli_Chr03              | 32847120                       | (T/A)       |
| 4558        | CakSNP4558     | <i>Kabuli</i>    | Ca_Kabuli_Chr03              | 32847216                       | (A/G)       |
| 4559        | CakSNP4559     | <i>Kabuli</i>    | Ca_Kabuli_Chr03              | 32865549                       | (C/T)       |

| <b>S.N.</b> | <b>SNP IDs</b> | <b>Cultivars</b> | <b>Chromosomes/scaffolds</b> | <b>Physical positions (bp)</b> | <b>SNPs</b> |
|-------------|----------------|------------------|------------------------------|--------------------------------|-------------|
| 4560        | CakSNP4560     | <i>Kabuli</i>    | Ca_Kabuli_Chr03              | 32865530                       | (C/G)       |
| 4561        | CakSNP4561     | <i>Kabuli</i>    | Ca_Kabuli_Chr03              | 32954428                       | (T/C)       |
| 4562        | CakSNP4562     | <i>Kabuli</i>    | Ca_Kabuli_Chr03              | 33033245                       | (T/C)       |
| 4563        | CakSNP4563     | <i>Kabuli</i>    | Ca_Kabuli_Chr03              | 33091737                       | (A/C)       |
| 4564        | CakSNP4564     | <i>Kabuli</i>    | Ca_Kabuli_Chr03              | 33120619                       | (G/A)       |
| 4565        | CakSNP4565     | <i>Kabuli</i>    | Ca_Kabuli_Chr03              | 33120825                       | (G/A)       |
| 4566        | CakSNP4566     | <i>Kabuli</i>    | Ca_Kabuli_Chr03              | 33520615                       | (A/C)       |
| 4567        | CakSNP4567     | <i>Kabuli</i>    | Ca_Kabuli_Chr03              | 33520887                       | (G/A)       |
| 4568        | CakSNP4568     | <i>Kabuli</i>    | Ca_Kabuli_Chr03              | 33522974                       | (G/A)       |
| 4569        | CakSNP4569     | <i>Kabuli</i>    | Ca_Kabuli_Chr03              | 33533273                       | (G/A)       |
| 4570        | CakSNP4570     | <i>Kabuli</i>    | Ca_Kabuli_Chr03              | 33627826                       | (A/C)       |
| 4571        | CakSNP4571     | <i>Kabuli</i>    | Ca_Kabuli_Chr03              | 33715215                       | (G/T)       |
| 4572        | CakSNP4572     | <i>Kabuli</i>    | Ca_Kabuli_Chr03              | 33898250                       | (C/T)       |
| 4573        | CakSNP4573     | <i>Kabuli</i>    | Ca_Kabuli_Chr03              | 33900522                       | (A/G)       |
| 4574        | CakSNP4574     | <i>Kabuli</i>    | Ca_Kabuli_Chr03              | 33900533                       | (A/G)       |
| 4575        | CakSNP4575     | <i>Kabuli</i>    | Ca_Kabuli_Chr03              | 33904394                       | (T/A)       |
| 4576        | CakSNP4576     | <i>Kabuli</i>    | Ca_Kabuli_Chr03              | 34247736                       | (T/G)       |
| 4577        | CakSNP4577     | <i>Kabuli</i>    | Ca_Kabuli_Chr03              | 34247831                       | (G/A)       |
| 4578        | CakSNP4578     | <i>Kabuli</i>    | Ca_Kabuli_Chr03              | 34247828                       | (T/C)       |
| 4579        | CakSNP4579     | <i>Kabuli</i>    | Ca_Kabuli_Chr03              | 34247893                       | (A/G)       |
| 4580        | CakSNP4580     | <i>Kabuli</i>    | Ca_Kabuli_Chr03              | 34268356                       | (A/T)       |
| 4581        | CakSNP4581     | <i>Kabuli</i>    | Ca_Kabuli_Chr03              | 34282419                       | (C/T)       |
| 4582        | CakSNP4582     | <i>Kabuli</i>    | Ca_Kabuli_Chr03              | 34290129                       | (T/C)       |
| 4583        | CakSNP4583     | <i>Kabuli</i>    | Ca_Kabuli_Chr03              | 34290135                       | (G/A)       |
| 4584        | CakSNP4584     | <i>Kabuli</i>    | Ca_Kabuli_Chr03              | 34290173                       | (C/T)       |
| 4585        | CakSNP4585     | <i>Kabuli</i>    | Ca_Kabuli_Chr03              | 34352385                       | (A/C)       |
| 4586        | CakSNP4586     | <i>Kabuli</i>    | Ca_Kabuli_Chr03              | 34356844                       | (A/C)       |
| 4587        | CakSNP4587     | <i>Kabuli</i>    | Ca_Kabuli_Chr03              | 34357171                       | (T/G)       |
| 4588        | CakSNP4588     | <i>Kabuli</i>    | Ca_Kabuli_Chr03              | 34357296                       | (C/G)       |
| 4589        | CakSNP4589     | <i>Kabuli</i>    | Ca_Kabuli_Chr03              | 34496982                       | (G/C)       |
| 4590        | CakSNP4590     | <i>Kabuli</i>    | Ca_Kabuli_Chr03              | 34524656                       | (C/A)       |
| 4591        | CakSNP4591     | <i>Kabuli</i>    | Ca_Kabuli_Chr03              | 34542046                       | (T/G)       |
| 4592        | CakSNP4592     | <i>Kabuli</i>    | Ca_Kabuli_Chr03              | 34543039                       | (C/T)       |
| 4593        | CakSNP4593     | <i>Kabuli</i>    | Ca_Kabuli_Chr03              | 34543111                       | (A/G)       |
| 4594        | CakSNP4594     | <i>Kabuli</i>    | Ca_Kabuli_Chr03              | 34547052                       | (A/T)       |
| 4595        | CakSNP4595     | <i>Kabuli</i>    | Ca_Kabuli_Chr03              | 34547069                       | (G/T)       |
| 4596        | CakSNP4596     | <i>Kabuli</i>    | Ca_Kabuli_Chr03              | 34547141                       | (A/G)       |
| 4597        | CakSNP4597     | <i>Kabuli</i>    | Ca_Kabuli_Chr03              | 34576769                       | (G/A)       |

| <b>S.N.</b> | <b>SNP IDs</b> | <b>Cultivars</b> | <b>Chromosomes/scaffolds</b> | <b>Physical positions (bp)</b> | <b>SNPs</b> |
|-------------|----------------|------------------|------------------------------|--------------------------------|-------------|
| 4598        | CakSNP4598     | <i>Kabuli</i>    | Ca_Kabuli_Chr03              | 34595487                       | (A/G)       |
| 4599        | CakSNP4599     | <i>Kabuli</i>    | Ca_Kabuli_Chr03              | 34601038                       | (T/C)       |
| 4600        | CakSNP4600     | <i>Kabuli</i>    | Ca_Kabuli_Chr03              | 34603669                       | (T/A)       |
| 4601        | CakSNP4601     | <i>Kabuli</i>    | Ca_Kabuli_Chr03              | 34650308                       | (G/A)       |
| 4602        | CakSNP4602     | <i>Kabuli</i>    | Ca_Kabuli_Chr03              | 34650245                       | (G/A)       |
| 4603        | CakSNP4603     | <i>Kabuli</i>    | Ca_Kabuli_Chr03              | 34662736                       | (T/G)       |
| 4604        | CakSNP4604     | <i>Kabuli</i>    | Ca_Kabuli_Chr03              | 34699114                       | (C/A)       |
| 4605        | CakSNP4605     | <i>Kabuli</i>    | Ca_Kabuli_Chr03              | 34699076                       | (T/C)       |
| 4606        | CakSNP4606     | <i>Kabuli</i>    | Ca_Kabuli_Chr03              | 34722508                       | (A/T)       |
| 4607        | CakSNP4607     | <i>Kabuli</i>    | Ca_Kabuli_Chr03              | 34722931                       | (A/G)       |
| 4608        | CakSNP4608     | <i>Kabuli</i>    | Ca_Kabuli_Chr03              | 34722979                       | (T/C)       |
| 4609        | CakSNP4609     | <i>Kabuli</i>    | Ca_Kabuli_Chr03              | 34722992                       | (T/G)       |
| 4610        | CakSNP4610     | <i>Kabuli</i>    | Ca_Kabuli_Chr03              | 34730463                       | (T/C)       |
| 4611        | CakSNP4611     | <i>Kabuli</i>    | Ca_Kabuli_Chr03              | 34730954                       | (G/A)       |
| 4612        | CakSNP4612     | <i>Kabuli</i>    | Ca_Kabuli_Chr03              | 34800277                       | (G/A)       |
| 4613        | CakSNP4613     | <i>Kabuli</i>    | Ca_Kabuli_Chr03              | 34820472                       | (T/A)       |
| 4614        | CakSNP4614     | <i>Kabuli</i>    | Ca_Kabuli_Chr03              | 34820532                       | (T/A)       |
| 4615        | CakSNP4615     | <i>Kabuli</i>    | Ca_Kabuli_Chr03              | 34852030                       | (G/A)       |
| 4616        | CakSNP4616     | <i>Kabuli</i>    | Ca_Kabuli_Chr03              | 34852070                       | (T/G)       |
| 4617        | CakSNP4617     | <i>Kabuli</i>    | Ca_Kabuli_Chr03              | 34852047                       | (T/A)       |
| 4618        | CakSNP4618     | <i>Kabuli</i>    | Ca_Kabuli_Chr03              | 34889316                       | (C/G)       |
| 4619        | CakSNP4619     | <i>Kabuli</i>    | Ca_Kabuli_Chr03              | 34889361                       | (T/C)       |
| 4620        | CakSNP4620     | <i>Kabuli</i>    | Ca_Kabuli_Chr03              | 34911621                       | (G/A)       |
| 4621        | CakSNP4621     | <i>Kabuli</i>    | Ca_Kabuli_Chr03              | 35071821                       | (A/G)       |
| 4622        | CakSNP4622     | <i>Kabuli</i>    | Ca_Kabuli_Chr03              | 35071852                       | (T/G)       |
| 4623        | CakSNP4623     | <i>Kabuli</i>    | Ca_Kabuli_Chr03              | 35085559                       | (T/A)       |
| 4624        | CakSNP4624     | <i>Kabuli</i>    | Ca_Kabuli_Chr03              | 35085658                       | (C/A)       |
| 4625        | CakSNP4625     | <i>Kabuli</i>    | Ca_Kabuli_Chr03              | 35126649                       | (C/G)       |
| 4626        | CakSNP4626     | <i>Kabuli</i>    | Ca_Kabuli_Chr03              | 35126766                       | (G/A)       |
| 4627        | CakSNP4627     | <i>Kabuli</i>    | Ca_Kabuli_Chr03              | 35126760                       | (G/A)       |
| 4628        | CakSNP4628     | <i>Kabuli</i>    | Ca_Kabuli_Chr03              | 35167312                       | (T/G)       |
| 4629        | CakSNP4629     | <i>Kabuli</i>    | Ca_Kabuli_Chr03              | 35167359                       | (T/G)       |
| 4630        | CakSNP4630     | <i>Kabuli</i>    | Ca_Kabuli_Chr03              | 35185001                       | (G/T)       |
| 4631        | CakSNP4631     | <i>Kabuli</i>    | Ca_Kabuli_Chr03              | 35274992                       | (A/G)       |
| 4632        | CakSNP4632     | <i>Kabuli</i>    | Ca_Kabuli_Chr03              | 35275199                       | (T/C)       |
| 4633        | CakSNP4633     | <i>Kabuli</i>    | Ca_Kabuli_Chr03              | 35332088                       | (T/A)       |
| 4634        | CakSNP4634     | <i>Kabuli</i>    | Ca_Kabuli_Chr03              | 35332091                       | (T/C)       |
| 4635        | CakSNP4635     | <i>Kabuli</i>    | Ca_Kabuli_Chr03              | 35383318                       | (C/T)       |

| <b>S.N.</b> | <b>SNP IDs</b> | <b>Cultivars</b> | <b>Chromosomes/scaffolds</b> | <b>Physical positions (bp)</b> | <b>SNPs</b> |
|-------------|----------------|------------------|------------------------------|--------------------------------|-------------|
| 4636        | CakSNP4636     | <i>Kabuli</i>    | Ca_Kabuli_Chr03              | 35394684                       | (G/T)       |
| 4637        | CakSNP4637     | <i>Kabuli</i>    | Ca_Kabuli_Chr03              | 35403074                       | (A/G)       |
| 4638        | CakSNP4638     | <i>Kabuli</i>    | Ca_Kabuli_Chr03              | 35420061                       | (A/G)       |
| 4639        | CakSNP4639     | <i>Kabuli</i>    | Ca_Kabuli_Chr03              | 35420108                       | (T/A)       |
| 4640        | CakSNP4640     | <i>Kabuli</i>    | Ca_Kabuli_Chr03              | 35424994                       | (T/C)       |
| 4641        | CakSNP4641     | <i>Kabuli</i>    | Ca_Kabuli_Chr03              | 35483932                       | (T/C)       |
| 4642        | CakSNP4642     | <i>Kabuli</i>    | Ca_Kabuli_Chr03              | 35483960                       | (T/C)       |
| 4643        | CakSNP4643     | <i>Kabuli</i>    | Ca_Kabuli_Chr03              | 35483995                       | (T/C)       |
| 4644        | CakSNP4644     | <i>Kabuli</i>    | Ca_Kabuli_Chr03              | 35483999                       | (C/T)       |
| 4645        | CakSNP4645     | <i>Kabuli</i>    | Ca_Kabuli_Chr03              | 35484034                       | (G/C)       |
| 4646        | CakSNP4646     | <i>Kabuli</i>    | Ca_Kabuli_Chr03              | 35487736                       | (T/C)       |
| 4647        | CakSNP4647     | <i>Kabuli</i>    | Ca_Kabuli_Chr03              | 35488503                       | (A/C)       |
| 4648        | CakSNP4648     | <i>Kabuli</i>    | Ca_Kabuli_Chr03              | 35488597                       | (T/C)       |
| 4649        | CakSNP4649     | <i>Kabuli</i>    | Ca_Kabuli_Chr03              | 35488570                       | (G/T)       |
| 4650        | CakSNP4650     | <i>Kabuli</i>    | Ca_Kabuli_Chr03              | 35490991                       | (A/G)       |
| 4651        | CakSNP4651     | <i>Kabuli</i>    | Ca_Kabuli_Chr03              | 35490951                       | (C/T)       |
| 4652        | CakSNP4652     | <i>Kabuli</i>    | Ca_Kabuli_Chr03              | 35543614                       | (C/T)       |
| 4653        | CakSNP4653     | <i>Kabuli</i>    | Ca_Kabuli_Chr03              | 35631679                       | (C/G)       |
| 4654        | CakSNP4654     | <i>Kabuli</i>    | Ca_Kabuli_Chr03              | 35631689                       | (C/A)       |
| 4655        | CakSNP4655     | <i>Kabuli</i>    | Ca_Kabuli_Chr03              | 35631723                       | (A/G)       |
| 4656        | CakSNP4656     | <i>Kabuli</i>    | Ca_Kabuli_Chr03              | 35647986                       | (C/G)       |
| 4657        | CakSNP4657     | <i>Kabuli</i>    | Ca_Kabuli_Chr03              | 35747394                       | (C/G)       |
| 4658        | CakSNP4658     | <i>Kabuli</i>    | Ca_Kabuli_Chr03              | 35807222                       | (A/G)       |
| 4659        | CakSNP4659     | <i>Kabuli</i>    | Ca_Kabuli_Chr03              | 35807265                       | (T/C)       |
| 4660        | CakSNP4660     | <i>Kabuli</i>    | Ca_Kabuli_Chr03              | 35807407                       | (A/T)       |
| 4661        | CakSNP4661     | <i>Kabuli</i>    | Ca_Kabuli_Chr03              | 35829834                       | (A/G)       |
| 4662        | CakSNP4662     | <i>Kabuli</i>    | Ca_Kabuli_Chr03              | 35898320                       | (G/C)       |
| 4663        | CakSNP4663     | <i>Kabuli</i>    | Ca_Kabuli_Chr03              | 35898374                       | (G/A)       |
| 4664        | CakSNP4664     | <i>Kabuli</i>    | Ca_Kabuli_Chr03              | 35898581                       | (C/T)       |
| 4665        | CakSNP4665     | <i>Kabuli</i>    | Ca_Kabuli_Chr03              | 35920684                       | (A/C)       |
| 4666        | CakSNP4666     | <i>Kabuli</i>    | Ca_Kabuli_Chr03              | 35920860                       | (C/A)       |
| 4667        | CakSNP4667     | <i>Kabuli</i>    | Ca_Kabuli_Chr03              | 35948487                       | (G/A)       |
| 4668        | CakSNP4668     | <i>Kabuli</i>    | Ca_Kabuli_Chr03              | 35979412                       | (G/T)       |
| 4669        | CakSNP4669     | <i>Kabuli</i>    | Ca_Kabuli_Chr03              | 36003699                       | (G/A)       |
| 4670        | CakSNP4670     | <i>Kabuli</i>    | Ca_Kabuli_Chr03              | 36003682                       | (G/T)       |
| 4671        | CakSNP4671     | <i>Kabuli</i>    | Ca_Kabuli_Chr03              | 36004638                       | (C/T)       |
| 4672        | CakSNP4672     | <i>Kabuli</i>    | Ca_Kabuli_Chr03              | 36004663                       | (T/C)       |
| 4673        | CakSNP4673     | <i>Kabuli</i>    | Ca_Kabuli_Chr03              | 36004668                       | (A/G)       |

| <b>S.N.</b> | <b>SNP IDs</b> | <b>Cultivars</b> | <b>Chromosomes/scaffolds</b> | <b>Physical positions (bp)</b> | <b>SNPs</b> |
|-------------|----------------|------------------|------------------------------|--------------------------------|-------------|
| 4674        | CakSNP4674     | <i>Kabuli</i>    | Ca_Kabuli_Chr03              | 36046759                       | (G/A)       |
| 4675        | CakSNP4675     | <i>Kabuli</i>    | Ca_Kabuli_Chr03              | 36046938                       | (C/T)       |
| 4676        | CakSNP4676     | <i>Kabuli</i>    | Ca_Kabuli_Chr03              | 36046956                       | (A/C)       |
| 4677        | CakSNP4677     | <i>Kabuli</i>    | Ca_Kabuli_Chr03              | 36050259                       | (T/G)       |
| 4678        | CakSNP4678     | <i>Kabuli</i>    | Ca_Kabuli_Chr03              | 36050319                       | (T/C)       |
| 4679        | CakSNP4679     | <i>Kabuli</i>    | Ca_Kabuli_Chr03              | 36071033                       | (A/G)       |
| 4680        | CakSNP4680     | <i>Kabuli</i>    | Ca_Kabuli_Chr03              | 36085966                       | (G/A)       |
| 4681        | CakSNP4681     | <i>Kabuli</i>    | Ca_Kabuli_Chr03              | 36117521                       | (A/G)       |
| 4682        | CakSNP4682     | <i>Kabuli</i>    | Ca_Kabuli_Chr03              | 36118120                       | (T/C)       |
| 4683        | CakSNP4683     | <i>Kabuli</i>    | Ca_Kabuli_Chr03              | 36118156                       | (C/T)       |
| 4684        | CakSNP4684     | <i>Kabuli</i>    | Ca_Kabuli_Chr03              | 36119592                       | (T/C)       |
| 4685        | CakSNP4685     | <i>Kabuli</i>    | Ca_Kabuli_Chr03              | 36119602                       | (C/A)       |
| 4686        | CakSNP4686     | <i>Kabuli</i>    | Ca_Kabuli_Chr03              | 36130561                       | (T/A)       |
| 4687        | CakSNP4687     | <i>Kabuli</i>    | Ca_Kabuli_Chr03              | 36130610                       | (C/A)       |
| 4688        | CakSNP4688     | <i>Kabuli</i>    | Ca_Kabuli_Chr03              | 36132440                       | (T/C)       |
| 4689        | CakSNP4689     | <i>Kabuli</i>    | Ca_Kabuli_Chr03              | 36132437                       | (C/T)       |
| 4690        | CakSNP4690     | <i>Kabuli</i>    | Ca_Kabuli_Chr03              | 36132401                       | (C/T)       |
| 4691        | CakSNP4691     | <i>Kabuli</i>    | Ca_Kabuli_Chr03              | 36132480                       | (C/T)       |
| 4692        | CakSNP4692     | <i>Kabuli</i>    | Ca_Kabuli_Chr03              | 36132539                       | (C/T)       |
| 4693        | CakSNP4693     | <i>Kabuli</i>    | Ca_Kabuli_Chr03              | 36132586                       | (T/G)       |
| 4694        | CakSNP4694     | <i>Kabuli</i>    | Ca_Kabuli_Chr03              | 36132570                       | (G/A)       |
| 4695        | CakSNP4695     | <i>Kabuli</i>    | Ca_Kabuli_Chr03              | 36132554                       | (A/T)       |
| 4696        | CakSNP4696     | <i>Kabuli</i>    | Ca_Kabuli_Chr03              | 36150722                       | (G/A)       |
| 4697        | CakSNP4697     | <i>Kabuli</i>    | Ca_Kabuli_Chr03              | 36150717                       | (T/C)       |
| 4698        | CakSNP4698     | <i>Kabuli</i>    | Ca_Kabuli_Chr03              | 36164863                       | (T/G)       |
| 4699        | CakSNP4699     | <i>Kabuli</i>    | Ca_Kabuli_Chr03              | 36164866                       | (T/C)       |
| 4700        | CakSNP4700     | <i>Kabuli</i>    | Ca_Kabuli_Chr03              | 36165997                       | (C/G)       |
| 4701        | CakSNP4701     | <i>Kabuli</i>    | Ca_Kabuli_Chr03              | 36167136                       | (G/T)       |
| 4702        | CakSNP4702     | <i>Kabuli</i>    | Ca_Kabuli_Chr03              | 36175164                       | (G/A)       |
| 4703        | CakSNP4703     | <i>Kabuli</i>    | Ca_Kabuli_Chr03              | 36177201                       | (T/C)       |
| 4704        | CakSNP4704     | <i>Kabuli</i>    | Ca_Kabuli_Chr03              | 36205806                       | (T/G)       |
| 4705        | CakSNP4705     | <i>Kabuli</i>    | Ca_Kabuli_Chr03              | 36205819                       | (A/G)       |
| 4706        | CakSNP4706     | <i>Kabuli</i>    | Ca_Kabuli_Chr03              | 36205845                       | (A/G)       |
| 4707        | CakSNP4707     | <i>Kabuli</i>    | Ca_Kabuli_Chr03              | 36206615                       | (A/C)       |
| 4708        | CakSNP4708     | <i>Kabuli</i>    | Ca_Kabuli_Chr03              | 36212799                       | (A/T)       |
| 4709        | CakSNP4709     | <i>Kabuli</i>    | Ca_Kabuli_Chr03              | 36212809                       | (G/A)       |
| 4710        | CakSNP4710     | <i>Kabuli</i>    | Ca_Kabuli_Chr03              | 36212843                       | (T/A)       |
| 4711        | CakSNP4711     | <i>Kabuli</i>    | Ca_Kabuli_Chr03              | 36217686                       | (G/A)       |

| <b>S.N.</b> | <b>SNP IDs</b> | <b>Cultivars</b> | <b>Chromosomes/scaffolds</b> | <b>Physical positions (bp)</b> | <b>SNPs</b> |
|-------------|----------------|------------------|------------------------------|--------------------------------|-------------|
| 4712        | CakSNP4712     | <i>Kabuli</i>    | Ca_Kabuli_Chr03              | 36227565                       | (A/T)       |
| 4713        | CakSNP4713     | <i>Kabuli</i>    | Ca_Kabuli_Chr03              | 36227566                       | (A/T)       |
| 4714        | CakSNP4714     | <i>Kabuli</i>    | Ca_Kabuli_Chr03              | 36227948                       | (A/G)       |
| 4715        | CakSNP4715     | <i>Kabuli</i>    | Ca_Kabuli_Chr03              | 36227949                       | (C/T)       |
| 4716        | CakSNP4716     | <i>Kabuli</i>    | Ca_Kabuli_Chr03              | 36228078                       | (G/A)       |
| 4717        | CakSNP4717     | <i>Kabuli</i>    | Ca_Kabuli_Chr03              | 36228032                       | (G/T)       |
| 4718        | CakSNP4718     | <i>Kabuli</i>    | Ca_Kabuli_Chr03              | 36228121                       | (T/A)       |
| 4719        | CakSNP4719     | <i>Kabuli</i>    | Ca_Kabuli_Chr03              | 36228126                       | (T/A)       |
| 4720        | CakSNP4720     | <i>Kabuli</i>    | Ca_Kabuli_Chr03              | 36242506                       | (C/T)       |
| 4721        | CakSNP4721     | <i>Kabuli</i>    | Ca_Kabuli_Chr03              | 36242504                       | (C/T)       |
| 4722        | CakSNP4722     | <i>Kabuli</i>    | Ca_Kabuli_Chr03              | 36242490                       | (G/T)       |
| 4723        | CakSNP4723     | <i>Kabuli</i>    | Ca_Kabuli_Chr03              | 36242480                       | (G/C)       |
| 4724        | CakSNP4724     | <i>Kabuli</i>    | Ca_Kabuli_Chr03              | 36247792                       | (T/C)       |
| 4725        | CakSNP4725     | <i>Kabuli</i>    | Ca_Kabuli_Chr03              | 36260865                       | (C/A)       |
| 4726        | CakSNP4726     | <i>Kabuli</i>    | Ca_Kabuli_Chr03              | 36282091                       | (T/G)       |
| 4727        | CakSNP4727     | <i>Kabuli</i>    | Ca_Kabuli_Chr03              | 36293589                       | (A/G)       |
| 4728        | CakSNP4728     | <i>Kabuli</i>    | Ca_Kabuli_Chr03              | 36293625                       | (C/T)       |
| 4729        | CakSNP4729     | <i>Kabuli</i>    | Ca_Kabuli_Chr03              | 36293637                       | (C/T)       |
| 4730        | CakSNP4730     | <i>Kabuli</i>    | Ca_Kabuli_Chr03              | 36330750                       | (A/G)       |
| 4731        | CakSNP4731     | <i>Kabuli</i>    | Ca_Kabuli_Chr03              | 36330815                       | (T/C)       |
| 4732        | CakSNP4732     | <i>Kabuli</i>    | Ca_Kabuli_Chr03              | 36345158                       | (T/C)       |
| 4733        | CakSNP4733     | <i>Kabuli</i>    | Ca_Kabuli_Chr03              | 36347203                       | (T/A)       |
| 4734        | CakSNP4734     | <i>Kabuli</i>    | Ca_Kabuli_Chr03              | 36361339                       | (C/T)       |
| 4735        | CakSNP4735     | <i>Kabuli</i>    | Ca_Kabuli_Chr03              | 36378294                       | (G/T)       |
| 4736        | CakSNP4736     | <i>Kabuli</i>    | Ca_Kabuli_Chr03              | 36378299                       | (C/G)       |
| 4737        | CakSNP4737     | <i>Kabuli</i>    | Ca_Kabuli_Chr03              | 36378358                       | (G/A)       |
| 4738        | CakSNP4738     | <i>Kabuli</i>    | Ca_Kabuli_Chr03              | 36387615                       | (A/T)       |
| 4739        | CakSNP4739     | <i>Kabuli</i>    | Ca_Kabuli_Chr03              | 36387732                       | (G/A)       |
| 4740        | CakSNP4740     | <i>Kabuli</i>    | Ca_Kabuli_Chr03              | 36387718                       | (C/T)       |
| 4741        | CakSNP4741     | <i>Kabuli</i>    | Ca_Kabuli_Chr03              | 36396559                       | (C/A)       |
| 4742        | CakSNP4742     | <i>Kabuli</i>    | Ca_Kabuli_Chr03              | 36420902                       | (T/C)       |
| 4743        | CakSNP4743     | <i>Kabuli</i>    | Ca_Kabuli_Chr03              | 36432389                       | (A/G)       |
| 4744        | CakSNP4744     | <i>Kabuli</i>    | Ca_Kabuli_Chr03              | 36447274                       | (G/A)       |
| 4745        | CakSNP4745     | <i>Kabuli</i>    | Ca_Kabuli_Chr03              | 36447364                       | (T/A)       |
| 4746        | CakSNP4746     | <i>Kabuli</i>    | Ca_Kabuli_Chr03              | 36447520                       | (T/A)       |
| 4747        | CakSNP4747     | <i>Kabuli</i>    | Ca_Kabuli_Chr03              | 36447525                       | (C/T)       |
| 4748        | CakSNP4748     | <i>Kabuli</i>    | Ca_Kabuli_Chr03              | 36488722                       | (T/A)       |
| 4749        | CakSNP4749     | <i>Kabuli</i>    | Ca_Kabuli_Chr03              | 36488736                       | (T/C)       |

| <b>S.N.</b> | <b>SNP IDs</b> | <b>Cultivars</b> | <b>Chromosomes/scaffolds</b> | <b>Physical positions (bp)</b> | <b>SNPs</b> |
|-------------|----------------|------------------|------------------------------|--------------------------------|-------------|
| 4750        | CakSNP4750     | <i>Kabuli</i>    | Ca_Kabuli_Chr03              | 36488853                       | (A/G)       |
| 4751        | CakSNP4751     | <i>Kabuli</i>    | Ca_Kabuli_Chr03              | 36488890                       | (A/G)       |
| 4752        | CakSNP4752     | <i>Kabuli</i>    | Ca_Kabuli_Chr03              | 36503906                       | (C/T)       |
| 4753        | CakSNP4753     | <i>Kabuli</i>    | Ca_Kabuli_Chr03              | 36503912                       | (T/C)       |
| 4754        | CakSNP4754     | <i>Kabuli</i>    | Ca_Kabuli_Chr03              | 36524598                       | (G/C)       |
| 4755        | CakSNP4755     | <i>Kabuli</i>    | Ca_Kabuli_Chr03              | 36524635                       | (A/G)       |
| 4756        | CakSNP4756     | <i>Kabuli</i>    | Ca_Kabuli_Chr03              | 36524659                       | (T/C)       |
| 4757        | CakSNP4757     | <i>Kabuli</i>    | Ca_Kabuli_Chr03              | 36531151                       | (C/A)       |
| 4758        | CakSNP4758     | <i>Kabuli</i>    | Ca_Kabuli_Chr03              | 36588856                       | (C/T)       |
| 4759        | CakSNP4759     | <i>Kabuli</i>    | Ca_Kabuli_Chr03              | 36588896                       | (C/G)       |
| 4760        | CakSNP4760     | <i>Kabuli</i>    | Ca_Kabuli_Chr03              | 36606527                       | (G/A)       |
| 4761        | CakSNP4761     | <i>Kabuli</i>    | Ca_Kabuli_Chr03              | 36609043                       | (G/A)       |
| 4762        | CakSNP4762     | <i>Kabuli</i>    | Ca_Kabuli_Chr03              | 36616855                       | (T/C)       |
| 4763        | CakSNP4763     | <i>Kabuli</i>    | Ca_Kabuli_Chr03              | 36644117                       | (A/T)       |
| 4764        | CakSNP4764     | <i>Kabuli</i>    | Ca_Kabuli_Chr03              | 36733097                       | (G/A)       |
| 4765        | CakSNP4765     | <i>Kabuli</i>    | Ca_Kabuli_Chr03              | 36733157                       | (A/G)       |
| 4766        | CakSNP4766     | <i>Kabuli</i>    | Ca_Kabuli_Chr03              | 36733211                       | (A/G)       |
| 4767        | CakSNP4767     | <i>Kabuli</i>    | Ca_Kabuli_Chr03              | 36749775                       | (T/A)       |
| 4768        | CakSNP4768     | <i>Kabuli</i>    | Ca_Kabuli_Chr03              | 36749826                       | (G/A)       |
| 4769        | CakSNP4769     | <i>Kabuli</i>    | Ca_Kabuli_Chr03              | 36749829                       | (T/C)       |
| 4770        | CakSNP4770     | <i>Kabuli</i>    | Ca_Kabuli_Chr03              | 36749831                       | (T/C)       |
| 4771        | CakSNP4771     | <i>Kabuli</i>    | Ca_Kabuli_Chr03              | 36749871                       | (T/C)       |
| 4772        | CakSNP4772     | <i>Kabuli</i>    | Ca_Kabuli_Chr03              | 36749904                       | (C/T)       |
| 4773        | CakSNP4773     | <i>Kabuli</i>    | Ca_Kabuli_Chr03              | 36749916                       | (C/A)       |
| 4774        | CakSNP4774     | <i>Kabuli</i>    | Ca_Kabuli_Chr03              | 36752689                       | (T/G)       |
| 4775        | CakSNP4775     | <i>Kabuli</i>    | Ca_Kabuli_Chr03              | 36769775                       | (G/T)       |
| 4776        | CakSNP4776     | <i>Kabuli</i>    | Ca_Kabuli_Chr03              | 36783494                       | (T/A)       |
| 4777        | CakSNP4777     | <i>Kabuli</i>    | Ca_Kabuli_Chr03              | 36825463                       | (T/C)       |
| 4778        | CakSNP4778     | <i>Kabuli</i>    | Ca_Kabuli_Chr03              | 36860134                       | (A/G)       |
| 4779        | CakSNP4779     | <i>Kabuli</i>    | Ca_Kabuli_Chr03              | 36860246                       | (T/C)       |
| 4780        | CakSNP4780     | <i>Kabuli</i>    | Ca_Kabuli_Chr03              | 36873720                       | (T/C)       |
| 4781        | CakSNP4781     | <i>Kabuli</i>    | Ca_Kabuli_Chr03              | 36883268                       | (T/C)       |
| 4782        | CakSNP4782     | <i>Kabuli</i>    | Ca_Kabuli_Chr03              | 36883333                       | (A/T)       |
| 4783        | CakSNP4783     | <i>Kabuli</i>    | Ca_Kabuli_Chr03              | 36895362                       | (T/C)       |
| 4784        | CakSNP4784     | <i>Kabuli</i>    | Ca_Kabuli_Chr03              | 36938148                       | (A/G)       |
| 4785        | CakSNP4785     | <i>Kabuli</i>    | Ca_Kabuli_Chr03              | 36938271                       | (G/C)       |
| 4786        | CakSNP4786     | <i>Kabuli</i>    | Ca_Kabuli_Chr03              | 36943522                       | (A/G)       |
| 4787        | CakSNP4787     | <i>Kabuli</i>    | Ca_Kabuli_Chr03              | 36991718                       | (C/A)       |



| <b>S.N.</b> | <b>SNP IDs</b> | <b>Cultivars</b> | <b>Chromosomes/scaffolds</b> | <b>Physical positions (bp)</b> | <b>SNPs</b> |
|-------------|----------------|------------------|------------------------------|--------------------------------|-------------|
| 4788        | CakSNP4788     | <i>Kabuli</i>    | Ca_Kabuli_Chr03              | 37003976                       | (C/T)       |
| 4789        | CakSNP4789     | <i>Kabuli</i>    | Ca_Kabuli_Chr03              | 37004026                       | (A/G)       |
| 4790        | CakSNP4790     | <i>Kabuli</i>    | Ca_Kabuli_Chr03              | 37022354                       | (A/G)       |
| 4791        | CakSNP4791     | <i>Kabuli</i>    | Ca_Kabuli_Chr03              | 37034618                       | (G/A)       |
| 4792        | CakSNP4792     | <i>Kabuli</i>    | Ca_Kabuli_Chr03              | 37067095                       | (T/G)       |
| 4793        | CakSNP4793     | <i>Kabuli</i>    | Ca_Kabuli_Chr03              | 37072289                       | (A/G)       |
| 4794        | CakSNP4794     | <i>Kabuli</i>    | Ca_Kabuli_Chr03              | 37072276                       | (T/G)       |
| 4795        | CakSNP4795     | <i>Kabuli</i>    | Ca_Kabuli_Chr03              | 37072312                       | (T/C)       |
| 4796        | CakSNP4796     | <i>Kabuli</i>    | Ca_Kabuli_Chr03              | 37077087                       | (G/T)       |
| 4797        | CakSNP4797     | <i>Kabuli</i>    | Ca_Kabuli_Chr03              | 37090968                       | (T/C)       |
| 4798        | CakSNP4798     | <i>Kabuli</i>    | Ca_Kabuli_Chr03              | 37091004                       | (A/G)       |
| 4799        | CakSNP4799     | <i>Kabuli</i>    | Ca_Kabuli_Chr03              | 37094437                       | (T/C)       |
| 4800        | CakSNP4800     | <i>Kabuli</i>    | Ca_Kabuli_Chr03              | 37100897                       | (G/T)       |
| 4801        | CakSNP4801     | <i>Kabuli</i>    | Ca_Kabuli_Chr03              | 37101339                       | (A/T)       |
| 4802        | CakSNP4802     | <i>Kabuli</i>    | Ca_Kabuli_Chr03              | 37101433                       | (T/G)       |
| 4803        | CakSNP4803     | <i>Kabuli</i>    | Ca_Kabuli_Chr03              | 37101409                       | (A/G)       |
| 4804        | CakSNP4804     | <i>Kabuli</i>    | Ca_Kabuli_Chr03              | 37108762                       | (A/G)       |
| 4805        | CakSNP4805     | <i>Kabuli</i>    | Ca_Kabuli_Chr03              | 37108908                       | (A/G)       |
| 4806        | CakSNP4806     | <i>Kabuli</i>    | Ca_Kabuli_Chr03              | 37108904                       | (A/T)       |
| 4807        | CakSNP4807     | <i>Kabuli</i>    | Ca_Kabuli_Chr03              | 37108876                       | (C/A)       |
| 4808        | CakSNP4808     | <i>Kabuli</i>    | Ca_Kabuli_Chr03              | 37110070                       | (A/G)       |
| 4809        | CakSNP4809     | <i>Kabuli</i>    | Ca_Kabuli_Chr03              | 37110124                       | (A/T)       |
| 4810        | CakSNP4810     | <i>Kabuli</i>    | Ca_Kabuli_Chr03              | 37146766                       | (C/G)       |
| 4811        | CakSNP4811     | <i>Kabuli</i>    | Ca_Kabuli_Chr03              | 37146840                       | (A/G)       |
| 4812        | CakSNP4812     | <i>Kabuli</i>    | Ca_Kabuli_Chr03              | 37154761                       | (T/G)       |
| 4813        | CakSNP4813     | <i>Kabuli</i>    | Ca_Kabuli_Chr03              | 37154857                       | (T/C)       |
| 4814        | CakSNP4814     | <i>Kabuli</i>    | Ca_Kabuli_Chr03              | 37154938                       | (A/C)       |
| 4815        | CakSNP4815     | <i>Kabuli</i>    | Ca_Kabuli_Chr03              | 37154957                       | (C/A)       |
| 4816        | CakSNP4816     | <i>Kabuli</i>    | Ca_Kabuli_Chr03              | 37155925                       | (G/A)       |
| 4817        | CakSNP4817     | <i>Kabuli</i>    | Ca_Kabuli_Chr03              | 37156951                       | (A/G)       |
| 4818        | CakSNP4818     | <i>Kabuli</i>    | Ca_Kabuli_Chr03              | 37160822                       | (G/T)       |
| 4819        | CakSNP4819     | <i>Kabuli</i>    | Ca_Kabuli_Chr03              | 37160939                       | (A/G)       |
| 4820        | CakSNP4820     | <i>Kabuli</i>    | Ca_Kabuli_Chr03              | 37164633                       | (T/C)       |
| 4821        | CakSNP4821     | <i>Kabuli</i>    | Ca_Kabuli_Chr03              | 37170249                       | (C/T)       |
| 4822        | CakSNP4822     | <i>Kabuli</i>    | Ca_Kabuli_Chr03              | 37271869                       | (T/C)       |
| 4823        | CakSNP4823     | <i>Kabuli</i>    | Ca_Kabuli_Chr03              | 37300206                       | (T/G)       |
| 4824        | CakSNP4824     | <i>Kabuli</i>    | Ca_Kabuli_Chr03              | 37303478                       | (G/A)       |
| 4825        | CakSNP4825     | <i>Kabuli</i>    | Ca_Kabuli_Chr03              | 37308614                       | (T/C)       |

| <b>S.N.</b> | <b>SNP IDs</b> | <b>Cultivars</b> | <b>Chromosomes/scaffolds</b> | <b>Physical positions (bp)</b> | <b>SNPs</b> |
|-------------|----------------|------------------|------------------------------|--------------------------------|-------------|
| 4826        | CakSNP4826     | <i>Kabuli</i>    | Ca_Kabuli_Chr03              | 37309420                       | (A/C)       |
| 4827        | CakSNP4827     | <i>Kabuli</i>    | Ca_Kabuli_Chr03              | 37316736                       | (T/C)       |
| 4828        | CakSNP4828     | <i>Kabuli</i>    | Ca_Kabuli_Chr03              | 37316737                       | (C/T)       |
| 4829        | CakSNP4829     | <i>Kabuli</i>    | Ca_Kabuli_Chr03              | 37316782                       | (G/A)       |
| 4830        | CakSNP4830     | <i>Kabuli</i>    | Ca_Kabuli_Chr03              | 37355013                       | (A/G)       |
| 4831        | CakSNP4831     | <i>Kabuli</i>    | Ca_Kabuli_Chr03              | 37444451                       | (C/A)       |
| 4832        | CakSNP4832     | <i>Kabuli</i>    | Ca_Kabuli_Chr03              | 37566557                       | (C/A)       |
| 4833        | CakSNP4833     | <i>Kabuli</i>    | Ca_Kabuli_Chr03              | 37599142                       | (T/C)       |
| 4834        | CakSNP4834     | <i>Kabuli</i>    | Ca_Kabuli_Chr03              | 37604672                       | (T/A)       |
| 4835        | CakSNP4835     | <i>Kabuli</i>    | Ca_Kabuli_Chr03              | 37630502                       | (T/C)       |
| 4836        | CakSNP4836     | <i>Kabuli</i>    | Ca_Kabuli_Chr03              | 37635909                       | (G/A)       |
| 4837        | CakSNP4837     | <i>Kabuli</i>    | Ca_Kabuli_Chr03              | 37635961                       | (C/T)       |
| 4838        | CakSNP4838     | <i>Kabuli</i>    | Ca_Kabuli_Chr03              | 37639300                       | (A/G)       |
| 4839        | CakSNP4839     | <i>Kabuli</i>    | Ca_Kabuli_Chr03              | 37682816                       | (T/C)       |
| 4840        | CakSNP4840     | <i>Kabuli</i>    | Ca_Kabuli_Chr03              | 37682824                       | (G/A)       |
| 4841        | CakSNP4841     | <i>Kabuli</i>    | Ca_Kabuli_Chr03              | 37723959                       | (C/T)       |
| 4842        | CakSNP4842     | <i>Kabuli</i>    | Ca_Kabuli_Chr03              | 37759329                       | (G/A)       |
| 4843        | CakSNP4843     | <i>Kabuli</i>    | Ca_Kabuli_Chr03              | 37765767                       | (A/C)       |
| 4844        | CakSNP4844     | <i>Kabuli</i>    | Ca_Kabuli_Chr03              | 37806690                       | (G/A)       |
| 4845        | CakSNP4845     | <i>Kabuli</i>    | Ca_Kabuli_Chr03              | 37814955                       | (A/T)       |
| 4846        | CakSNP4846     | <i>Kabuli</i>    | Ca_Kabuli_Chr03              | 37814954                       | (T/A)       |
| 4847        | CakSNP4847     | <i>Kabuli</i>    | Ca_Kabuli_Chr03              | 37816895                       | (T/A)       |
| 4848        | CakSNP4848     | <i>Kabuli</i>    | Ca_Kabuli_Chr03              | 37859943                       | (T/C)       |
| 4849        | CakSNP4849     | <i>Kabuli</i>    | Ca_Kabuli_Chr03              | 37864390                       | (C/T)       |
| 4850        | CakSNP4850     | <i>Kabuli</i>    | Ca_Kabuli_Chr03              | 37866258                       | (A/G)       |
| 4851        | CakSNP4851     | <i>Kabuli</i>    | Ca_Kabuli_Chr03              | 37886983                       | (G/T)       |
| 4852        | CakSNP4852     | <i>Kabuli</i>    | Ca_Kabuli_Chr03              | 37886971                       | (A/G)       |
| 4853        | CakSNP4853     | <i>Kabuli</i>    | Ca_Kabuli_Chr03              | 37886942                       | (A/C)       |
| 4854        | CakSNP4854     | <i>Kabuli</i>    | Ca_Kabuli_Chr03              | 37908317                       | (T/C)       |
| 4855        | CakSNP4855     | <i>Kabuli</i>    | Ca_Kabuli_Chr03              | 37908492                       | (A/C)       |
| 4856        | CakSNP4856     | <i>Kabuli</i>    | Ca_Kabuli_Chr03              | 37910881                       | (A/G)       |
| 4857        | CakSNP4857     | <i>Kabuli</i>    | Ca_Kabuli_Chr03              | 37910899                       | (T/C)       |
| 4858        | CakSNP4858     | <i>Kabuli</i>    | Ca_Kabuli_Chr03              | 37910911                       | (C/T)       |
| 4859        | CakSNP4859     | <i>Kabuli</i>    | Ca_Kabuli_Chr03              | 37913266                       | (C/T)       |
| 4860        | CakSNP4860     | <i>Kabuli</i>    | Ca_Kabuli_Chr03              | 37919880                       | (C/T)       |
| 4861        | CakSNP4861     | <i>Kabuli</i>    | Ca_Kabuli_Chr03              | 37942807                       | (A/G)       |
| 4862        | CakSNP4862     | <i>Kabuli</i>    | Ca_Kabuli_Chr03              | 37942962                       | (T/C)       |
| 4863        | CakSNP4863     | <i>Kabuli</i>    | Ca_Kabuli_Chr03              | 37985612                       | (A/C)       |

| <b>S.N.</b> | <b>SNP IDs</b> | <b>Cultivars</b> | <b>Chromosomes/scaffolds</b> | <b>Physical positions (bp)</b> | <b>SNPs</b> |
|-------------|----------------|------------------|------------------------------|--------------------------------|-------------|
| 4864        | CakSNP4864     | <i>Kabuli</i>    | Ca_Kabuli_Chr03              | 37985652                       | (C/T)       |
| 4865        | CakSNP4865     | <i>Kabuli</i>    | Ca_Kabuli_Chr03              | 37985776                       | (T/A)       |
| 4866        | CakSNP4866     | <i>Kabuli</i>    | Ca_Kabuli_Chr03              | 37985977                       | (A/G)       |
| 4867        | CakSNP4867     | <i>Kabuli</i>    | Ca_Kabuli_Chr03              | 37985947                       | (A/T)       |
| 4868        | CakSNP4868     | <i>Kabuli</i>    | Ca_Kabuli_Chr03              | 38026470                       | (G/C)       |
| 4869        | CakSNP4869     | <i>Kabuli</i>    | Ca_Kabuli_Chr03              | 38026539                       | (A/G)       |
| 4870        | CakSNP4870     | <i>Kabuli</i>    | Ca_Kabuli_Chr03              | 38026734                       | (G/C)       |
| 4871        | CakSNP4871     | <i>Kabuli</i>    | Ca_Kabuli_Chr03              | 38026725                       | (G/A)       |
| 4872        | CakSNP4872     | <i>Kabuli</i>    | Ca_Kabuli_Chr03              | 38029095                       | (G/C)       |
| 4873        | CakSNP4873     | <i>Kabuli</i>    | Ca_Kabuli_Chr03              | 38033965                       | (G/A)       |
| 4874        | CakSNP4874     | <i>Kabuli</i>    | Ca_Kabuli_Chr03              | 38033969                       | (A/G)       |
| 4875        | CakSNP4875     | <i>Kabuli</i>    | Ca_Kabuli_Chr03              | 38046510                       | (T/C)       |
| 4876        | CakSNP4876     | <i>Kabuli</i>    | Ca_Kabuli_Chr03              | 38046575                       | (A/C)       |
| 4877        | CakSNP4877     | <i>Kabuli</i>    | Ca_Kabuli_Chr03              | 38049996                       | (A/G)       |
| 4878        | CakSNP4878     | <i>Kabuli</i>    | Ca_Kabuli_Chr03              | 38059303                       | (T/C)       |
| 4879        | CakSNP4879     | <i>Kabuli</i>    | Ca_Kabuli_Chr03              | 38059311                       | (T/A)       |
| 4880        | CakSNP4880     | <i>Kabuli</i>    | Ca_Kabuli_Chr03              | 38060814                       | (A/G)       |
| 4881        | CakSNP4881     | <i>Kabuli</i>    | Ca_Kabuli_Chr03              | 38060755                       | (T/C)       |
| 4882        | CakSNP4882     | <i>Kabuli</i>    | Ca_Kabuli_Chr03              | 38060742                       | (C/T)       |
| 4883        | CakSNP4883     | <i>Kabuli</i>    | Ca_Kabuli_Chr03              | 38074259                       | (C/A)       |
| 4884        | CakSNP4884     | <i>Kabuli</i>    | Ca_Kabuli_Chr03              | 38103375                       | (T/C)       |
| 4885        | CakSNP4885     | <i>Kabuli</i>    | Ca_Kabuli_Chr03              | 38103378                       | (C/T)       |
| 4886        | CakSNP4886     | <i>Kabuli</i>    | Ca_Kabuli_Chr03              | 38103381                       | (C/T)       |
| 4887        | CakSNP4887     | <i>Kabuli</i>    | Ca_Kabuli_Chr03              | 38103385                       | (C/T)       |
| 4888        | CakSNP4888     | <i>Kabuli</i>    | Ca_Kabuli_Chr03              | 38103524                       | (C/T)       |
| 4889        | CakSNP4889     | <i>Kabuli</i>    | Ca_Kabuli_Chr03              | 38112801                       | (C/T)       |
| 4890        | CakSNP4890     | <i>Kabuli</i>    | Ca_Kabuli_Chr03              | 38112802                       | (T/C)       |
| 4891        | CakSNP4891     | <i>Kabuli</i>    | Ca_Kabuli_Chr03              | 38112971                       | (A/G)       |
| 4892        | CakSNP4892     | <i>Kabuli</i>    | Ca_Kabuli_Chr03              | 38117169                       | (T/C)       |
| 4893        | CakSNP4893     | <i>Kabuli</i>    | Ca_Kabuli_Chr03              | 38130415                       | (T/C)       |
| 4894        | CakSNP4894     | <i>Kabuli</i>    | Ca_Kabuli_Chr03              | 38130410                       | (A/G)       |
| 4895        | CakSNP4895     | <i>Kabuli</i>    | Ca_Kabuli_Chr03              | 38145115                       | (C/T)       |
| 4896        | CakSNP4896     | <i>Kabuli</i>    | Ca_Kabuli_Chr03              | 38157519                       | (T/C)       |
| 4897        | CakSNP4897     | <i>Kabuli</i>    | Ca_Kabuli_Chr03              | 38166074                       | (A/G)       |
| 4898        | CakSNP4898     | <i>Kabuli</i>    | Ca_Kabuli_Chr03              | 38166881                       | (C/T)       |
| 4899        | CakSNP4899     | <i>Kabuli</i>    | Ca_Kabuli_Chr03              | 38202223                       | (C/T)       |
| 4900        | CakSNP4900     | <i>Kabuli</i>    | Ca_Kabuli_Chr03              | 38220910                       | (T/C)       |
| 4901        | CakSNP4901     | <i>Kabuli</i>    | Ca_Kabuli_Chr03              | 38220949                       | (A/T)       |

| <b>S.N.</b> | <b>SNP IDs</b> | <b>Cultivars</b> | <b>Chromosomes/scaffolds</b> | <b>Physical positions (bp)</b> | <b>SNPs</b> |
|-------------|----------------|------------------|------------------------------|--------------------------------|-------------|
| 4902        | CakSNP4902     | <i>Kabuli</i>    | Ca_Kabuli_Chr03              | 38220958                       | (A/G)       |
| 4903        | CakSNP4903     | <i>Kabuli</i>    | Ca_Kabuli_Chr03              | 38222750                       | (A/C)       |
| 4904        | CakSNP4904     | <i>Kabuli</i>    | Ca_Kabuli_Chr03              | 38222747                       | (G/A)       |
| 4905        | CakSNP4905     | <i>Kabuli</i>    | Ca_Kabuli_Chr03              | 38222733                       | (C/G)       |
| 4906        | CakSNP4906     | <i>Kabuli</i>    | Ca_Kabuli_Chr03              | 38228118                       | (G/T)       |
| 4907        | CakSNP4907     | <i>Kabuli</i>    | Ca_Kabuli_Chr03              | 38237246                       | (T/G)       |
| 4908        | CakSNP4908     | <i>Kabuli</i>    | Ca_Kabuli_Chr03              | 38251660                       | (C/A)       |
| 4909        | CakSNP4909     | <i>Kabuli</i>    | Ca_Kabuli_Chr03              | 38253654                       | (T/C)       |
| 4910        | CakSNP4910     | <i>Kabuli</i>    | Ca_Kabuli_Chr03              | 38258645                       | (C/A)       |
| 4911        | CakSNP4911     | <i>Kabuli</i>    | Ca_Kabuli_Chr03              | 38264250                       | (C/T)       |
| 4912        | CakSNP4912     | <i>Kabuli</i>    | Ca_Kabuli_Chr03              | 38294286                       | (C/A)       |
| 4913        | CakSNP4913     | <i>Kabuli</i>    | Ca_Kabuli_Chr03              | 38296573                       | (A/G)       |
| 4914        | CakSNP4914     | <i>Kabuli</i>    | Ca_Kabuli_Chr03              | 38315560                       | (G/T)       |
| 4915        | CakSNP4915     | <i>Kabuli</i>    | Ca_Kabuli_Chr03              | 38321159                       | (T/C)       |
| 4916        | CakSNP4916     | <i>Kabuli</i>    | Ca_Kabuli_Chr03              | 38321153                       | (G/T)       |
| 4917        | CakSNP4917     | <i>Kabuli</i>    | Ca_Kabuli_Chr03              | 38386392                       | (T/C)       |
| 4918        | CakSNP4918     | <i>Kabuli</i>    | Ca_Kabuli_Chr03              | 38424238                       | (A/T)       |
| 4919        | CakSNP4919     | <i>Kabuli</i>    | Ca_Kabuli_Chr03              | 38452060                       | (A/C)       |
| 4920        | CakSNP4920     | <i>Kabuli</i>    | Ca_Kabuli_Chr03              | 38465366                       | (G/A)       |
| 4921        | CakSNP4921     | <i>Kabuli</i>    | Ca_Kabuli_Chr03              | 38465335                       | (G/A)       |
| 4922        | CakSNP4922     | <i>Kabuli</i>    | Ca_Kabuli_Chr03              | 38465440                       | (G/A)       |
| 4923        | CakSNP4923     | <i>Kabuli</i>    | Ca_Kabuli_Chr03              | 38496236                       | (A/G)       |
| 4924        | CakSNP4924     | <i>Kabuli</i>    | Ca_Kabuli_Chr03              | 38501705                       | (T/C)       |
| 4925        | CakSNP4925     | <i>Kabuli</i>    | Ca_Kabuli_Chr03              | 38539721                       | (T/G)       |
| 4926        | CakSNP4926     | <i>Kabuli</i>    | Ca_Kabuli_Chr03              | 38551142                       | (C/T)       |
| 4927        | CakSNP4927     | <i>Kabuli</i>    | Ca_Kabuli_Chr03              | 38555941                       | (G/A)       |
| 4928        | CakSNP4928     | <i>Kabuli</i>    | Ca_Kabuli_Chr03              | 38555944                       | (A/G)       |
| 4929        | CakSNP4929     | <i>Kabuli</i>    | Ca_Kabuli_Chr03              | 38592077                       | (G/A)       |
| 4930        | CakSNP4930     | <i>Kabuli</i>    | Ca_Kabuli_Chr03              | 38624786                       | (C/T)       |
| 4931        | CakSNP4931     | <i>Kabuli</i>    | Ca_Kabuli_Chr03              | 38624934                       | (T/C)       |
| 4932        | CakSNP4932     | <i>Kabuli</i>    | Ca_Kabuli_Chr03              | 38672863                       | (C/A)       |
| 4933        | CakSNP4933     | <i>Kabuli</i>    | Ca_Kabuli_Chr03              | 38704356                       | (C/T)       |
| 4934        | CakSNP4934     | <i>Kabuli</i>    | Ca_Kabuli_Chr03              | 38728528                       | (C/T)       |
| 4935        | CakSNP4935     | <i>Kabuli</i>    | Ca_Kabuli_Chr03              | 38728679                       | (T/C)       |
| 4936        | CakSNP4936     | <i>Kabuli</i>    | Ca_Kabuli_Chr03              | 38731315                       | (C/T)       |
| 4937        | CakSNP4937     | <i>Kabuli</i>    | Ca_Kabuli_Chr03              | 38731466                       | (T/G)       |
| 4938        | CakSNP4938     | <i>Kabuli</i>    | Ca_Kabuli_Chr03              | 38764372                       | (G/A)       |
| 4939        | CakSNP4939     | <i>Kabuli</i>    | Ca_Kabuli_Chr03              | 38764390                       | (A/C)       |

| <b>S.N.</b> | <b>SNP IDs</b> | <b>Cultivars</b> | <b>Chromosomes/scaffolds</b> | <b>Physical positions (bp)</b> | <b>SNPs</b> |
|-------------|----------------|------------------|------------------------------|--------------------------------|-------------|
| 4940        | CakSNP4940     | <i>Kabuli</i>    | Ca_Kabuli_Chr03              | 38766156                       | (T/A)       |
| 4941        | CakSNP4941     | <i>Kabuli</i>    | Ca_Kabuli_Chr03              | 38766174                       | (A/G)       |
| 4942        | CakSNP4942     | <i>Kabuli</i>    | Ca_Kabuli_Chr03              | 38766311                       | (A/C)       |
| 4943        | CakSNP4943     | <i>Kabuli</i>    | Ca_Kabuli_Chr03              | 38771817                       | (A/G)       |
| 4944        | CakSNP4944     | <i>Kabuli</i>    | Ca_Kabuli_Chr03              | 38776366                       | (T/G)       |
| 4945        | CakSNP4945     | <i>Kabuli</i>    | Ca_Kabuli_Chr03              | 38785843                       | (C/G)       |
| 4946        | CakSNP4946     | <i>Kabuli</i>    | Ca_Kabuli_Chr03              | 38785845                       | (C/T)       |
| 4947        | CakSNP4947     | <i>Kabuli</i>    | Ca_Kabuli_Chr03              | 38793194                       | (T/C)       |
| 4948        | CakSNP4948     | <i>Kabuli</i>    | Ca_Kabuli_Chr03              | 38805822                       | (T/A)       |
| 4949        | CakSNP4949     | <i>Kabuli</i>    | Ca_Kabuli_Chr03              | 38805831                       | (A/C)       |
| 4950        | CakSNP4950     | <i>Kabuli</i>    | Ca_Kabuli_Chr03              | 38809132                       | (G/A)       |
| 4951        | CakSNP4951     | <i>Kabuli</i>    | Ca_Kabuli_Chr03              | 38810765                       | (A/T)       |
| 4952        | CakSNP4952     | <i>Kabuli</i>    | Ca_Kabuli_Chr03              | 38818340                       | (A/G)       |
| 4953        | CakSNP4953     | <i>Kabuli</i>    | Ca_Kabuli_Chr03              | 38821990                       | (A/G)       |
| 4954        | CakSNP4954     | <i>Kabuli</i>    | Ca_Kabuli_Chr03              | 38831533                       | (T/C)       |
| 4955        | CakSNP4955     | <i>Kabuli</i>    | Ca_Kabuli_Chr03              | 38848358                       | (C/T)       |
| 4956        | CakSNP4956     | <i>Kabuli</i>    | Ca_Kabuli_Chr03              | 38848412                       | (C/G)       |
| 4957        | CakSNP4957     | <i>Kabuli</i>    | Ca_Kabuli_Chr03              | 38878577                       | (C/G)       |
| 4958        | CakSNP4958     | <i>Kabuli</i>    | Ca_Kabuli_Chr03              | 38878664                       | (G/C)       |
| 4959        | CakSNP4959     | <i>Kabuli</i>    | Ca_Kabuli_Chr03              | 38878649                       | (T/C)       |
| 4960        | CakSNP4960     | <i>Kabuli</i>    | Ca_Kabuli_Chr03              | 38878736                       | (G/C)       |
| 4961        | CakSNP4961     | <i>Kabuli</i>    | Ca_Kabuli_Chr03              | 38887640                       | (C/T)       |
| 4962        | CakSNP4962     | <i>Kabuli</i>    | Ca_Kabuli_Chr03              | 38891567                       | (T/C)       |
| 4963        | CakSNP4963     | <i>Kabuli</i>    | Ca_Kabuli_Chr03              | 38896013                       | (A/G)       |
| 4964        | CakSNP4964     | <i>Kabuli</i>    | Ca_Kabuli_Chr03              | 38913449                       | (T/C)       |
| 4965        | CakSNP4965     | <i>Kabuli</i>    | Ca_Kabuli_Chr03              | 38914528                       | (A/G)       |
| 4966        | CakSNP4966     | <i>Kabuli</i>    | Ca_Kabuli_Chr03              | 38923321                       | (C/T)       |
| 4967        | CakSNP4967     | <i>Kabuli</i>    | Ca_Kabuli_Chr03              | 38951428                       | (G/A)       |
| 4968        | CakSNP4968     | <i>Kabuli</i>    | Ca_Kabuli_Chr03              | 38951698                       | (A/C)       |
| 4969        | CakSNP4969     | <i>Kabuli</i>    | Ca_Kabuli_Chr03              | 38965610                       | (T/A)       |
| 4970        | CakSNP4970     | <i>Kabuli</i>    | Ca_Kabuli_Chr03              | 38982481                       | (A/G)       |
| 4971        | CakSNP4971     | <i>Kabuli</i>    | Ca_Kabuli_Chr03              | 38987810                       | (G/A)       |
| 4972        | CakSNP4972     | <i>Kabuli</i>    | Ca_Kabuli_Chr03              | 38987916                       | (A/C)       |
| 4973        | CakSNP4973     | <i>Kabuli</i>    | Ca_Kabuli_Chr03              | 39003771                       | (G/A)       |
| 4974        | CakSNP4974     | <i>Kabuli</i>    | Ca_Kabuli_Chr03              | 39013988                       | (T/G)       |
| 4975        | CakSNP4975     | <i>Kabuli</i>    | Ca_Kabuli_Chr03              | 39029251                       | (A/C)       |
| 4976        | CakSNP4976     | <i>Kabuli</i>    | Ca_Kabuli_Chr03              | 39034246                       | (C/T)       |
| 4977        | CakSNP4977     | <i>Kabuli</i>    | Ca_Kabuli_Chr03              | 39034433                       | (A/G)       |

| <b>S.N.</b> | <b>SNP IDs</b> | <b>Cultivars</b> | <b>Chromosomes/scaffolds</b> | <b>Physical positions (bp)</b> | <b>SNPs</b> |
|-------------|----------------|------------------|------------------------------|--------------------------------|-------------|
| 4978        | CakSNP4978     | <i>Kabuli</i>    | Ca_Kabuli_Chr03              | 39036130                       | (T/C)       |
| 4979        | CakSNP4979     | <i>Kabuli</i>    | Ca_Kabuli_Chr03              | 39052024                       | (T/C)       |
| 4980        | CakSNP4980     | <i>Kabuli</i>    | Ca_Kabuli_Chr03              | 39055529                       | (C/T)       |
| 4981        | CakSNP4981     | <i>Kabuli</i>    | Ca_Kabuli_Chr03              | 39055455                       | (T/C)       |
| 4982        | CakSNP4982     | <i>Kabuli</i>    | Ca_Kabuli_Chr03              | 39081040                       | (A/G)       |
| 4983        | CakSNP4983     | <i>Kabuli</i>    | Ca_Kabuli_Chr03              | 39084916                       | (T/A)       |
| 4984        | CakSNP4984     | <i>Kabuli</i>    | Ca_Kabuli_Chr03              | 39084979                       | (A/C)       |
| 4985        | CakSNP4985     | <i>Kabuli</i>    | Ca_Kabuli_Chr03              | 39093242                       | (G/A)       |
| 4986        | CakSNP4986     | <i>Kabuli</i>    | Ca_Kabuli_Chr03              | 39093243                       | (C/A)       |
| 4987        | CakSNP4987     | <i>Kabuli</i>    | Ca_Kabuli_Chr03              | 39093245                       | (T/A)       |
| 4988        | CakSNP4988     | <i>Kabuli</i>    | Ca_Kabuli_Chr03              | 39093215                       | (G/A)       |
| 4989        | CakSNP4989     | <i>Kabuli</i>    | Ca_Kabuli_Chr03              | 39115274                       | (A/C)       |
| 4990        | CakSNP4990     | <i>Kabuli</i>    | Ca_Kabuli_Chr03              | 39115986                       | (C/G)       |
| 4991        | CakSNP4991     | <i>Kabuli</i>    | Ca_Kabuli_Chr03              | 39115979                       | (A/G)       |
| 4992        | CakSNP4992     | <i>Kabuli</i>    | Ca_Kabuli_Chr03              | 39115972                       | (T/A)       |
| 4993        | CakSNP4993     | <i>Kabuli</i>    | Ca_Kabuli_Chr03              | 39115970                       | (T/G)       |
| 4994        | CakSNP4994     | <i>Kabuli</i>    | Ca_Kabuli_Chr03              | 39118510                       | (C/T)       |
| 4995        | CakSNP4995     | <i>Kabuli</i>    | Ca_Kabuli_Chr03              | 39200823                       | (C/A)       |
| 4996        | CakSNP4996     | <i>Kabuli</i>    | Ca_Kabuli_Chr03              | 39200847                       | (A/C)       |
| 4997        | CakSNP4997     | <i>Kabuli</i>    | Ca_Kabuli_Chr03              | 39202479                       | (G/C)       |
| 4998        | CakSNP4998     | <i>Kabuli</i>    | Ca_Kabuli_Chr03              | 39202481                       | (A/T)       |
| 4999        | CakSNP4999     | <i>Kabuli</i>    | Ca_Kabuli_Chr03              | 39207112                       | (A/C)       |
| 5000        | CakSNP5000     | <i>Kabuli</i>    | Ca_Kabuli_Chr03              | 39215327                       | (C/T)       |
| 5001        | CakSNP5001     | <i>Kabuli</i>    | Ca_Kabuli_Chr03              | 39215476                       | (G/A)       |
| 5002        | CakSNP5002     | <i>Kabuli</i>    | Ca_Kabuli_Chr03              | 39215558                       | (C/T)       |
| 5003        | CakSNP5003     | <i>Kabuli</i>    | Ca_Kabuli_Chr03              | 39233774                       | (A/T)       |
| 5004        | CakSNP5004     | <i>Kabuli</i>    | Ca_Kabuli_Chr03              | 39233852                       | (A/C)       |
| 5005        | CakSNP5005     | <i>Kabuli</i>    | Ca_Kabuli_Chr03              | 39233885                       | (A/T)       |
| 5006        | CakSNP5006     | <i>Kabuli</i>    | Ca_Kabuli_Chr03              | 39234161                       | (A/G)       |
| 5007        | CakSNP5007     | <i>Kabuli</i>    | Ca_Kabuli_Chr03              | 39254527                       | (T/G)       |
| 5008        | CakSNP5008     | <i>Kabuli</i>    | Ca_Kabuli_Chr03              | 39254532                       | (C/G)       |
| 5009        | CakSNP5009     | <i>Kabuli</i>    | Ca_Kabuli_Chr03              | 39255721                       | (A/C)       |
| 5010        | CakSNP5010     | <i>Kabuli</i>    | Ca_Kabuli_Chr03              | 39255715                       | (G/A)       |
| 5011        | CakSNP5011     | <i>Kabuli</i>    | Ca_Kabuli_Chr03              | 39255713                       | (C/A)       |
| 5012        | CakSNP5012     | <i>Kabuli</i>    | Ca_Kabuli_Chr03              | 39255709                       | (A/T)       |
| 5013        | CakSNP5013     | <i>Kabuli</i>    | Ca_Kabuli_Chr03              | 39255729                       | (C/T)       |
| 5014        | CakSNP5014     | <i>Kabuli</i>    | Ca_Kabuli_Chr03              | 39255792                       | (C/T)       |
| 5015        | CakSNP5015     | <i>Kabuli</i>    | Ca_Kabuli_Chr03              | 39257226                       | (A/G)       |

| <b>S.N.</b> | <b>SNP IDs</b> | <b>Cultivars</b> | <b>Chromosomes/scaffolds</b> | <b>Physical positions (bp)</b> | <b>SNPs</b> |
|-------------|----------------|------------------|------------------------------|--------------------------------|-------------|
| 5016        | CakSNP5016     | <i>Kabuli</i>    | Ca_Kabuli_Chr03              | 39258671                       | (A/C)       |
| 5017        | CakSNP5017     | <i>Kabuli</i>    | Ca_Kabuli_Chr03              | 39265412                       | (A/C)       |
| 5018        | CakSNP5018     | <i>Kabuli</i>    | Ca_Kabuli_Chr03              | 39289840                       | (T/A)       |
| 5019        | CakSNP5019     | <i>Kabuli</i>    | Ca_Kabuli_Chr03              | 39303386                       | (C/G)       |
| 5020        | CakSNP5020     | <i>Kabuli</i>    | Ca_Kabuli_Chr03              | 39303416                       | (G/T)       |
| 5021        | CakSNP5021     | <i>Kabuli</i>    | Ca_Kabuli_Chr03              | 39303407                       | (C/A)       |
| 5022        | CakSNP5022     | <i>Kabuli</i>    | Ca_Kabuli_Chr03              | 39323779                       | (A/G)       |
| 5023        | CakSNP5023     | <i>Kabuli</i>    | Ca_Kabuli_Chr03              | 39326387                       | (C/T)       |
| 5024        | CakSNP5024     | <i>Kabuli</i>    | Ca_Kabuli_Chr03              | 39405252                       | (C/A)       |
| 5025        | CakSNP5025     | <i>Kabuli</i>    | Ca_Kabuli_Chr03              | 39405873                       | (C/G)       |
| 5026        | CakSNP5026     | <i>Kabuli</i>    | Ca_Kabuli_Chr03              | 39472291                       | (G/C)       |
| 5027        | CakSNP5027     | <i>Kabuli</i>    | Ca_Kabuli_Chr03              | 39481371                       | (A/C)       |
| 5028        | CakSNP5028     | <i>Kabuli</i>    | Ca_Kabuli_Chr03              | 39485182                       | (G/A)       |
| 5029        | CakSNP5029     | <i>Kabuli</i>    | Ca_Kabuli_Chr03              | 39504242                       | (A/G)       |
| 5030        | CakSNP5030     | <i>Kabuli</i>    | Ca_Kabuli_Chr03              | 39515531                       | (A/G)       |
| 5031        | CakSNP5031     | <i>Kabuli</i>    | Ca_Kabuli_Chr03              | 39515710                       | (T/A)       |
| 5032        | CakSNP5032     | <i>Kabuli</i>    | Ca_Kabuli_Chr03              | 39519640                       | (A/G)       |
| 5033        | CakSNP5033     | <i>Kabuli</i>    | Ca_Kabuli_Chr03              | 39556535                       | (T/A)       |
| 5034        | CakSNP5034     | <i>Kabuli</i>    | Ca_Kabuli_Chr03              | 39587620                       | (T/G)       |
| 5035        | CakSNP5035     | <i>Kabuli</i>    | Ca_Kabuli_Chr03              | 39592340                       | (C/T)       |
| 5036        | CakSNP5036     | <i>Kabuli</i>    | Ca_Kabuli_Chr03              | 39612466                       | (T/C)       |
| 5037        | CakSNP5037     | <i>Kabuli</i>    | Ca_Kabuli_Chr03              | 39612458                       | (C/A)       |
| 5038        | CakSNP5038     | <i>Kabuli</i>    | Ca_Kabuli_Chr03              | 39612447                       | (C/A)       |
| 5039        | CakSNP5039     | <i>Kabuli</i>    | Ca_Kabuli_Chr03              | 39612568                       | (A/T)       |
| 5040        | CakSNP5040     | <i>Kabuli</i>    | Ca_Kabuli_Chr03              | 39628916                       | (G/A)       |
| 5041        | CakSNP5041     | <i>Kabuli</i>    | Ca_Kabuli_Chr03              | 39698060                       | (T/C)       |
| 5042        | CakSNP5042     | <i>Kabuli</i>    | Ca_Kabuli_Chr03              | 39701532                       | (G/A)       |
| 5043        | CakSNP5043     | <i>Kabuli</i>    | Ca_Kabuli_Chr03              | 39722314                       | (C/T)       |
| 5044        | CakSNP5044     | <i>Kabuli</i>    | Ca_Kabuli_Chr03              | 39731437                       | (A/C)       |
| 5045        | CakSNP5045     | <i>Kabuli</i>    | Ca_Kabuli_Chr03              | 39787513                       | (A/C)       |
| 5046        | CakSNP5046     | <i>Kabuli</i>    | Ca_Kabuli_Chr03              | 39787615                       | (C/T)       |
| 5047        | CakSNP5047     | <i>Kabuli</i>    | Ca_Kabuli_Chr03              | 39787716                       | (A/C)       |
| 5048        | CakSNP5048     | <i>Kabuli</i>    | Ca_Kabuli_Chr03              | 39791717                       | (C/T)       |
| 5049        | CakSNP5049     | <i>Kabuli</i>    | Ca_Kabuli_Chr03              | 39793539                       | (G/A)       |
| 5050        | CakSNP5050     | <i>Kabuli</i>    | Ca_Kabuli_Chr03              | 39794672                       | (C/T)       |
| 5051        | CakSNP5051     | <i>Kabuli</i>    | Ca_Kabuli_Chr03              | 39794639                       | (C/G)       |
| 5052        | CakSNP5052     | <i>Kabuli</i>    | Ca_Kabuli_Chr03              | 39801213                       | (A/G)       |
| 5053        | CakSNP5053     | <i>Kabuli</i>    | Ca_Kabuli_Chr03              | 39801242                       | (C/T)       |

| <b>S.N.</b> | <b>SNP IDs</b> | <b>Cultivars</b> | <b>Chromosomes/scaffolds</b> | <b>Physical positions (bp)</b> | <b>SNPs</b> |
|-------------|----------------|------------------|------------------------------|--------------------------------|-------------|
| 5054        | CakSNP5054     | <i>Kabuli</i>    | Ca_Kabuli_Chr03              | 39817122                       | (G/A)       |
| 5055        | CakSNP5055     | <i>Kabuli</i>    | Ca_Kabuli_Chr03              | 39839763                       | (T/G)       |
| 5056        | CakSNP5056     | <i>Kabuli</i>    | Ca_Kabuli_Chr03              | 39891075                       | (G/A)       |
| 5057        | CakSNP5057     | <i>Kabuli</i>    | Ca_Kabuli_Chr03              | 39890991                       | (A/T)       |
| 5058        | CakSNP5058     | <i>Kabuli</i>    | Ca_Kabuli_Chr03              | 39896395                       | (A/G)       |
| 5059        | CakSNP5059     | <i>Kabuli</i>    | Ca_Kabuli_Chr03              | 39908983                       | (C/G)       |
| 5060        | CakSNP5060     | <i>Kabuli</i>    | Ca_Kabuli_Chr03              | 39909824                       | (C/G)       |
| 5061        | CakSNP5061     | <i>Kabuli</i>    | Ca_Kabuli_Chr03              | 39909839                       | (T/C)       |
| 5062        | CakSNP5062     | <i>Kabuli</i>    | Ca_Kabuli_Chr03              | 39914344                       | (T/G)       |
| 5063        | CakSNP5063     | <i>Kabuli</i>    | Ca_Kabuli_Chr03              | 39941101                       | (T/G)       |
| 5064        | CakSNP5064     | <i>Kabuli</i>    | Ca_Kabuli_Chr03              | 39941090                       | (G/A)       |
| 5065        | CakSNP5065     | <i>Kabuli</i>    | Ca_Kabuli_Chr04              | 20297                          | (A/G)       |
| 5066        | CakSNP5066     | <i>Kabuli</i>    | Ca_Kabuli_Chr04              | 20495                          | (G/C)       |
| 5067        | CakSNP5067     | <i>Kabuli</i>    | Ca_Kabuli_Chr04              | 167229                         | (T/G)       |
| 5068        | CakSNP5068     | <i>Kabuli</i>    | Ca_Kabuli_Chr04              | 228864                         | (G/A)       |
| 5069        | CakSNP5069     | <i>Kabuli</i>    | Ca_Kabuli_Chr04              | 305558                         | (C/T)       |
| 5070        | CakSNP5070     | <i>Kabuli</i>    | Ca_Kabuli_Chr04              | 335941                         | (C/T)       |
| 5071        | CakSNP5071     | <i>Kabuli</i>    | Ca_Kabuli_Chr04              | 336055                         | (G/A)       |
| 5072        | CakSNP5072     | <i>Kabuli</i>    | Ca_Kabuli_Chr04              | 336050                         | (T/C)       |
| 5073        | CakSNP5073     | <i>Kabuli</i>    | Ca_Kabuli_Chr04              | 336029                         | (G/A)       |
| 5074        | CakSNP5074     | <i>Kabuli</i>    | Ca_Kabuli_Chr04              | 338641                         | (A/G)       |
| 5075        | CakSNP5075     | <i>Kabuli</i>    | Ca_Kabuli_Chr04              | 338721                         | (C/T)       |
| 5076        | CakSNP5076     | <i>Kabuli</i>    | Ca_Kabuli_Chr04              | 338707                         | (G/T)       |
| 5077        | CakSNP5077     | <i>Kabuli</i>    | Ca_Kabuli_Chr04              | 349309                         | (C/T)       |
| 5078        | CakSNP5078     | <i>Kabuli</i>    | Ca_Kabuli_Chr04              | 353069                         | (C/A)       |
| 5079        | CakSNP5079     | <i>Kabuli</i>    | Ca_Kabuli_Chr04              | 353079                         | (C/T)       |
| 5080        | CakSNP5080     | <i>Kabuli</i>    | Ca_Kabuli_Chr04              | 353119                         | (G/A)       |
| 5081        | CakSNP5081     | <i>Kabuli</i>    | Ca_Kabuli_Chr04              | 353120                         | (C/G)       |
| 5082        | CakSNP5082     | <i>Kabuli</i>    | Ca_Kabuli_Chr04              | 353124                         | (A/G)       |
| 5083        | CakSNP5083     | <i>Kabuli</i>    | Ca_Kabuli_Chr04              | 353126                         | (T/G)       |
| 5084        | CakSNP5084     | <i>Kabuli</i>    | Ca_Kabuli_Chr04              | 369258                         | (C/T)       |
| 5085        | CakSNP5085     | <i>Kabuli</i>    | Ca_Kabuli_Chr04              | 394661                         | (C/G)       |
| 5086        | CakSNP5086     | <i>Kabuli</i>    | Ca_Kabuli_Chr04              | 411208                         | (A/C)       |
| 5087        | CakSNP5087     | <i>Kabuli</i>    | Ca_Kabuli_Chr04              | 412017                         | (C/A)       |
| 5088        | CakSNP5088     | <i>Kabuli</i>    | Ca_Kabuli_Chr04              | 455361                         | (A/G)       |
| 5089        | CakSNP5089     | <i>Kabuli</i>    | Ca_Kabuli_Chr04              | 459360                         | (T/C)       |
| 5090        | CakSNP5090     | <i>Kabuli</i>    | Ca_Kabuli_Chr04              | 480138                         | (C/A)       |
| 5091        | CakSNP5091     | <i>Kabuli</i>    | Ca_Kabuli_Chr04              | 481556                         | (A/G)       |



| <b>S.N.</b> | <b>SNP IDs</b> | <b>Cultivars</b> | <b>Chromosomes/scaffolds</b> | <b>Physical positions (bp)</b> | <b>SNPs</b> |
|-------------|----------------|------------------|------------------------------|--------------------------------|-------------|
| 5092        | CakSNP5092     | <i>Kabuli</i>    | Ca_Kabuli_Chr04              | 481687                         | (T/G)       |
| 5093        | CakSNP5093     | <i>Kabuli</i>    | Ca_Kabuli_Chr04              | 504928                         | (C/A)       |
| 5094        | CakSNP5094     | <i>Kabuli</i>    | Ca_Kabuli_Chr04              | 586273                         | (A/G)       |
| 5095        | CakSNP5095     | <i>Kabuli</i>    | Ca_Kabuli_Chr04              | 586703                         | (T/C)       |
| 5096        | CakSNP5096     | <i>Kabuli</i>    | Ca_Kabuli_Chr04              | 589140                         | (T/C)       |
| 5097        | CakSNP5097     | <i>Kabuli</i>    | Ca_Kabuli_Chr04              | 589191                         | (A/G)       |
| 5098        | CakSNP5098     | <i>Kabuli</i>    | Ca_Kabuli_Chr04              | 589204                         | (G/A)       |
| 5099        | CakSNP5099     | <i>Kabuli</i>    | Ca_Kabuli_Chr04              | 589220                         | (A/C)       |
| 5100        | CakSNP5100     | <i>Kabuli</i>    | Ca_Kabuli_Chr04              | 589224                         | (T/C)       |
| 5101        | CakSNP5101     | <i>Kabuli</i>    | Ca_Kabuli_Chr04              | 595982                         | (C/G)       |
| 5102        | CakSNP5102     | <i>Kabuli</i>    | Ca_Kabuli_Chr04              | 613150                         | (G/A)       |
| 5103        | CakSNP5103     | <i>Kabuli</i>    | Ca_Kabuli_Chr04              | 613166                         | (A/G)       |
| 5104        | CakSNP5104     | <i>Kabuli</i>    | Ca_Kabuli_Chr04              | 645103                         | (T/A)       |
| 5105        | CakSNP5105     | <i>Kabuli</i>    | Ca_Kabuli_Chr04              | 645075                         | (T/A)       |
| 5106        | CakSNP5106     | <i>Kabuli</i>    | Ca_Kabuli_Chr04              | 646567                         | (C/T)       |
| 5107        | CakSNP5107     | <i>Kabuli</i>    | Ca_Kabuli_Chr04              | 646576                         | (A/G)       |
| 5108        | CakSNP5108     | <i>Kabuli</i>    | Ca_Kabuli_Chr04              | 651040                         | (C/T)       |
| 5109        | CakSNP5109     | <i>Kabuli</i>    | Ca_Kabuli_Chr04              | 660034                         | (A/C)       |
| 5110        | CakSNP5110     | <i>Kabuli</i>    | Ca_Kabuli_Chr04              | 660029                         | (T/G)       |
| 5111        | CakSNP5111     | <i>Kabuli</i>    | Ca_Kabuli_Chr04              | 703978                         | (A/T)       |
| 5112        | CakSNP5112     | <i>Kabuli</i>    | Ca_Kabuli_Chr04              | 703975                         | (G/T)       |
| 5113        | CakSNP5113     | <i>Kabuli</i>    | Ca_Kabuli_Chr04              | 704009                         | (G/A)       |
| 5114        | CakSNP5114     | <i>Kabuli</i>    | Ca_Kabuli_Chr04              | 705336                         | (T/G)       |
| 5115        | CakSNP5115     | <i>Kabuli</i>    | Ca_Kabuli_Chr04              | 783302                         | (C/T)       |
| 5116        | CakSNP5116     | <i>Kabuli</i>    | Ca_Kabuli_Chr04              | 783382                         | (G/T)       |
| 5117        | CakSNP5117     | <i>Kabuli</i>    | Ca_Kabuli_Chr04              | 827630                         | (T/C)       |
| 5118        | CakSNP5118     | <i>Kabuli</i>    | Ca_Kabuli_Chr04              | 848192                         | (G/A)       |
| 5119        | CakSNP5119     | <i>Kabuli</i>    | Ca_Kabuli_Chr04              | 913689                         | (A/G)       |
| 5120        | CakSNP5120     | <i>Kabuli</i>    | Ca_Kabuli_Chr04              | 951389                         | (T/G)       |
| 5121        | CakSNP5121     | <i>Kabuli</i>    | Ca_Kabuli_Chr04              | 951390                         | (G/A)       |
| 5122        | CakSNP5122     | <i>Kabuli</i>    | Ca_Kabuli_Chr04              | 1035328                        | (G/C)       |
| 5123        | CakSNP5123     | <i>Kabuli</i>    | Ca_Kabuli_Chr04              | 1047639                        | (G/T)       |
| 5124        | CakSNP5124     | <i>Kabuli</i>    | Ca_Kabuli_Chr04              | 1065107                        | (C/T)       |
| 5125        | CakSNP5125     | <i>Kabuli</i>    | Ca_Kabuli_Chr04              | 1065245                        | (A/G)       |
| 5126        | CakSNP5126     | <i>Kabuli</i>    | Ca_Kabuli_Chr04              | 1189997                        | (C/T)       |
| 5127        | CakSNP5127     | <i>Kabuli</i>    | Ca_Kabuli_Chr04              | 1190007                        | (C/G)       |
| 5128        | CakSNP5128     | <i>Kabuli</i>    | Ca_Kabuli_Chr04              | 1190038                        | (G/T)       |
| 5129        | CakSNP5129     | <i>Kabuli</i>    | Ca_Kabuli_Chr04              | 1190208                        | (T/C)       |

| <b>S.N.</b> | <b>SNP IDs</b> | <b>Cultivars</b> | <b>Chromosomes/scaffolds</b> | <b>Physical positions (bp)</b> | <b>SNPs</b> |
|-------------|----------------|------------------|------------------------------|--------------------------------|-------------|
| 5130        | CakSNP5130     | <i>Kabuli</i>    | Ca_Kabuli_Chr04              | 1190184                        | (A/C)       |
| 5131        | CakSNP5131     | <i>Kabuli</i>    | Ca_Kabuli_Chr04              | 1190158                        | (T/G)       |
| 5132        | CakSNP5132     | <i>Kabuli</i>    | Ca_Kabuli_Chr04              | 1259917                        | (G/T)       |
| 5133        | CakSNP5133     | <i>Kabuli</i>    | Ca_Kabuli_Chr04              | 1259915                        | (T/G)       |
| 5134        | CakSNP5134     | <i>Kabuli</i>    | Ca_Kabuli_Chr04              | 1264361                        | (T/C)       |
| 5135        | CakSNP5135     | <i>Kabuli</i>    | Ca_Kabuli_Chr04              | 1266175                        | (A/G)       |
| 5136        | CakSNP5136     | <i>Kabuli</i>    | Ca_Kabuli_Chr04              | 1266174                        | (C/T)       |
| 5137        | CakSNP5137     | <i>Kabuli</i>    | Ca_Kabuli_Chr04              | 1283369                        | (A/G)       |
| 5138        | CakSNP5138     | <i>Kabuli</i>    | Ca_Kabuli_Chr04              | 1344151                        | (T/C)       |
| 5139        | CakSNP5139     | <i>Kabuli</i>    | Ca_Kabuli_Chr04              | 1396281                        | (G/C)       |
| 5140        | CakSNP5140     | <i>Kabuli</i>    | Ca_Kabuli_Chr04              | 1396425                        | (C/A)       |
| 5141        | CakSNP5141     | <i>Kabuli</i>    | Ca_Kabuli_Chr04              | 1474771                        | (T/C)       |
| 5142        | CakSNP5142     | <i>Kabuli</i>    | Ca_Kabuli_Chr04              | 1474898                        | (A/G)       |
| 5143        | CakSNP5143     | <i>Kabuli</i>    | Ca_Kabuli_Chr04              | 1474922                        | (G/T)       |
| 5144        | CakSNP5144     | <i>Kabuli</i>    | Ca_Kabuli_Chr04              | 1493927                        | (T/C)       |
| 5145        | CakSNP5145     | <i>Kabuli</i>    | Ca_Kabuli_Chr04              | 1513664                        | (T/A)       |
| 5146        | CakSNP5146     | <i>Kabuli</i>    | Ca_Kabuli_Chr04              | 1526270                        | (T/C)       |
| 5147        | CakSNP5147     | <i>Kabuli</i>    | Ca_Kabuli_Chr04              | 1526731                        | (T/G)       |
| 5148        | CakSNP5148     | <i>Kabuli</i>    | Ca_Kabuli_Chr04              | 1613153                        | (G/A)       |
| 5149        | CakSNP5149     | <i>Kabuli</i>    | Ca_Kabuli_Chr04              | 1613193                        | (G/A)       |
| 5150        | CakSNP5150     | <i>Kabuli</i>    | Ca_Kabuli_Chr04              | 1613303                        | (G/A)       |
| 5151        | CakSNP5151     | <i>Kabuli</i>    | Ca_Kabuli_Chr04              | 1687346                        | (A/G)       |
| 5152        | CakSNP5152     | <i>Kabuli</i>    | Ca_Kabuli_Chr04              | 1691555                        | (T/G)       |
| 5153        | CakSNP5153     | <i>Kabuli</i>    | Ca_Kabuli_Chr04              | 1708370                        | (C/T)       |
| 5154        | CakSNP5154     | <i>Kabuli</i>    | Ca_Kabuli_Chr04              | 1711864                        | (A/C)       |
| 5155        | CakSNP5155     | <i>Kabuli</i>    | Ca_Kabuli_Chr04              | 1711865                        | (G/A)       |
| 5156        | CakSNP5156     | <i>Kabuli</i>    | Ca_Kabuli_Chr04              | 1720544                        | (A/C)       |
| 5157        | CakSNP5157     | <i>Kabuli</i>    | Ca_Kabuli_Chr04              | 1720658                        | (A/G)       |
| 5158        | CakSNP5158     | <i>Kabuli</i>    | Ca_Kabuli_Chr04              | 1720642                        | (A/G)       |
| 5159        | CakSNP5159     | <i>Kabuli</i>    | Ca_Kabuli_Chr04              | 1720619                        | (A/C)       |
| 5160        | CakSNP5160     | <i>Kabuli</i>    | Ca_Kabuli_Chr04              | 1742468                        | (C/T)       |
| 5161        | CakSNP5161     | <i>Kabuli</i>    | Ca_Kabuli_Chr04              | 1747181                        | (A/T)       |
| 5162        | CakSNP5162     | <i>Kabuli</i>    | Ca_Kabuli_Chr04              | 1754555                        | (C/T)       |
| 5163        | CakSNP5163     | <i>Kabuli</i>    | Ca_Kabuli_Chr04              | 1755066                        | (G/C)       |
| 5164        | CakSNP5164     | <i>Kabuli</i>    | Ca_Kabuli_Chr04              | 1773886                        | (C/G)       |
| 5165        | CakSNP5165     | <i>Kabuli</i>    | Ca_Kabuli_Chr04              | 1773939                        | (C/T)       |
| 5166        | CakSNP5166     | <i>Kabuli</i>    | Ca_Kabuli_Chr04              | 1773951                        | (C/G)       |
| 5167        | CakSNP5167     | <i>Kabuli</i>    | Ca_Kabuli_Chr04              | 1785705                        | (G/C)       |

| <b>S.N.</b> | <b>SNP IDs</b> | <b>Cultivars</b> | <b>Chromosomes/scaffolds</b> | <b>Physical positions (bp)</b> | <b>SNPs</b> |
|-------------|----------------|------------------|------------------------------|--------------------------------|-------------|
| 5168        | CakSNP5168     | <i>Kabuli</i>    | Ca_Kabuli_Chr04              | 1785680                        | (C/T)       |
| 5169        | CakSNP5169     | <i>Kabuli</i>    | Ca_Kabuli_Chr04              | 1807484                        | (G/A)       |
| 5170        | CakSNP5170     | <i>Kabuli</i>    | Ca_Kabuli_Chr04              | 1817779                        | (G/C)       |
| 5171        | CakSNP5171     | <i>Kabuli</i>    | Ca_Kabuli_Chr04              | 1833570                        | (T/C)       |
| 5172        | CakSNP5172     | <i>Kabuli</i>    | Ca_Kabuli_Chr04              | 1833678                        | (A/G)       |
| 5173        | CakSNP5173     | <i>Kabuli</i>    | Ca_Kabuli_Chr04              | 1833725                        | (C/T)       |
| 5174        | CakSNP5174     | <i>Kabuli</i>    | Ca_Kabuli_Chr04              | 1845301                        | (G/A)       |
| 5175        | CakSNP5175     | <i>Kabuli</i>    | Ca_Kabuli_Chr04              | 1867921                        | (G/A)       |
| 5176        | CakSNP5176     | <i>Kabuli</i>    | Ca_Kabuli_Chr04              | 1869577                        | (C/T)       |
| 5177        | CakSNP5177     | <i>Kabuli</i>    | Ca_Kabuli_Chr04              | 1870333                        | (A/G)       |
| 5178        | CakSNP5178     | <i>Kabuli</i>    | Ca_Kabuli_Chr04              | 1870317                        | (T/C)       |
| 5179        | CakSNP5179     | <i>Kabuli</i>    | Ca_Kabuli_Chr04              | 1870666                        | (G/C)       |
| 5180        | CakSNP5180     | <i>Kabuli</i>    | Ca_Kabuli_Chr04              | 1870806                        | (C/A)       |
| 5181        | CakSNP5181     | <i>Kabuli</i>    | Ca_Kabuli_Chr04              | 1870802                        | (C/T)       |
| 5182        | CakSNP5182     | <i>Kabuli</i>    | Ca_Kabuli_Chr04              | 1873733                        | (T/C)       |
| 5183        | CakSNP5183     | <i>Kabuli</i>    | Ca_Kabuli_Chr04              | 1890220                        | (G/C)       |
| 5184        | CakSNP5184     | <i>Kabuli</i>    | Ca_Kabuli_Chr04              | 1941001                        | (T/G)       |
| 5185        | CakSNP5185     | <i>Kabuli</i>    | Ca_Kabuli_Chr04              | 1941089                        | (C/T)       |
| 5186        | CakSNP5186     | <i>Kabuli</i>    | Ca_Kabuli_Chr04              | 1970471                        | (A/C)       |
| 5187        | CakSNP5187     | <i>Kabuli</i>    | Ca_Kabuli_Chr04              | 1973375                        | (A/C)       |
| 5188        | CakSNP5188     | <i>Kabuli</i>    | Ca_Kabuli_Chr04              | 2009707                        | (A/G)       |
| 5189        | CakSNP5189     | <i>Kabuli</i>    | Ca_Kabuli_Chr04              | 2025214                        | (A/C)       |
| 5190        | CakSNP5190     | <i>Kabuli</i>    | Ca_Kabuli_Chr04              | 2027063                        | (G/A)       |
| 5191        | CakSNP5191     | <i>Kabuli</i>    | Ca_Kabuli_Chr04              | 2027101                        | (T/A)       |
| 5192        | CakSNP5192     | <i>Kabuli</i>    | Ca_Kabuli_Chr04              | 2034429                        | (C/A)       |
| 5193        | CakSNP5193     | <i>Kabuli</i>    | Ca_Kabuli_Chr04              | 2034398                        | (C/T)       |
| 5194        | CakSNP5194     | <i>Kabuli</i>    | Ca_Kabuli_Chr04              | 2034396                        | (A/G)       |
| 5195        | CakSNP5195     | <i>Kabuli</i>    | Ca_Kabuli_Chr04              | 2034739                        | (A/C)       |
| 5196        | CakSNP5196     | <i>Kabuli</i>    | Ca_Kabuli_Chr04              | 2035797                        | (G/A)       |
| 5197        | CakSNP5197     | <i>Kabuli</i>    | Ca_Kabuli_Chr04              | 2035801                        | (G/A)       |
| 5198        | CakSNP5198     | <i>Kabuli</i>    | Ca_Kabuli_Chr04              | 2035841                        | (C/T)       |
| 5199        | CakSNP5199     | <i>Kabuli</i>    | Ca_Kabuli_Chr04              | 2035894                        | (C/A)       |
| 5200        | CakSNP5200     | <i>Kabuli</i>    | Ca_Kabuli_Chr04              | 2051684                        | (T/C)       |
| 5201        | CakSNP5201     | <i>Kabuli</i>    | Ca_Kabuli_Chr04              | 2051642                        | (G/C)       |
| 5202        | CakSNP5202     | <i>Kabuli</i>    | Ca_Kabuli_Chr04              | 2060244                        | (G/A)       |
| 5203        | CakSNP5203     | <i>Kabuli</i>    | Ca_Kabuli_Chr04              | 2060262                        | (C/T)       |
| 5204        | CakSNP5204     | <i>Kabuli</i>    | Ca_Kabuli_Chr04              | 2113564                        | (A/G)       |
| 5205        | CakSNP5205     | <i>Kabuli</i>    | Ca_Kabuli_Chr04              | 2125774                        | (G/A)       |

| <b>S.N.</b> | <b>SNP IDs</b> | <b>Cultivars</b> | <b>Chromosomes/scaffolds</b> | <b>Physical positions (bp)</b> | <b>SNPs</b> |
|-------------|----------------|------------------|------------------------------|--------------------------------|-------------|
| 5206        | CakSNP5206     | <i>Kabuli</i>    | Ca_Kabuli_Chr04              | 2143155                        | (A/G)       |
| 5207        | CakSNP5207     | <i>Kabuli</i>    | Ca_Kabuli_Chr04              | 2213710                        | (G/A)       |
| 5208        | CakSNP5208     | <i>Kabuli</i>    | Ca_Kabuli_Chr04              | 2238480                        | (A/T)       |
| 5209        | CakSNP5209     | <i>Kabuli</i>    | Ca_Kabuli_Chr04              | 2270360                        | (T/C)       |
| 5210        | CakSNP5210     | <i>Kabuli</i>    | Ca_Kabuli_Chr04              | 2277421                        | (A/T)       |
| 5211        | CakSNP5211     | <i>Kabuli</i>    | Ca_Kabuli_Chr04              | 2311977                        | (A/G)       |
| 5212        | CakSNP5212     | <i>Kabuli</i>    | Ca_Kabuli_Chr04              | 2313969                        | (G/A)       |
| 5213        | CakSNP5213     | <i>Kabuli</i>    | Ca_Kabuli_Chr04              | 2361088                        | (T/A)       |
| 5214        | CakSNP5214     | <i>Kabuli</i>    | Ca_Kabuli_Chr04              | 2380206                        | (A/G)       |
| 5215        | CakSNP5215     | <i>Kabuli</i>    | Ca_Kabuli_Chr04              | 2393033                        | (T/G)       |
| 5216        | CakSNP5216     | <i>Kabuli</i>    | Ca_Kabuli_Chr04              | 2396883                        | (A/G)       |
| 5217        | CakSNP5217     | <i>Kabuli</i>    | Ca_Kabuli_Chr04              | 2411925                        | (G/T)       |
| 5218        | CakSNP5218     | <i>Kabuli</i>    | Ca_Kabuli_Chr04              | 2422087                        | (A/G)       |
| 5219        | CakSNP5219     | <i>Kabuli</i>    | Ca_Kabuli_Chr04              | 2422092                        | (G/A)       |
| 5220        | CakSNP5220     | <i>Kabuli</i>    | Ca_Kabuli_Chr04              | 2422949                        | (C/T)       |
| 5221        | CakSNP5221     | <i>Kabuli</i>    | Ca_Kabuli_Chr04              | 2463064                        | (A/G)       |
| 5222        | CakSNP5222     | <i>Kabuli</i>    | Ca_Kabuli_Chr04              | 2463038                        | (T/C)       |
| 5223        | CakSNP5223     | <i>Kabuli</i>    | Ca_Kabuli_Chr04              | 2492726                        | (A/G)       |
| 5224        | CakSNP5224     | <i>Kabuli</i>    | Ca_Kabuli_Chr04              | 2493195                        | (T/C)       |
| 5225        | CakSNP5225     | <i>Kabuli</i>    | Ca_Kabuli_Chr04              | 2494101                        | (C/A)       |
| 5226        | CakSNP5226     | <i>Kabuli</i>    | Ca_Kabuli_Chr04              | 2494140                        | (C/A)       |
| 5227        | CakSNP5227     | <i>Kabuli</i>    | Ca_Kabuli_Chr04              | 2499257                        | (A/C)       |
| 5228        | CakSNP5228     | <i>Kabuli</i>    | Ca_Kabuli_Chr04              | 2562541                        | (G/C)       |
| 5229        | CakSNP5229     | <i>Kabuli</i>    | Ca_Kabuli_Chr04              | 2564500                        | (T/A)       |
| 5230        | CakSNP5230     | <i>Kabuli</i>    | Ca_Kabuli_Chr04              | 2609945                        | (C/T)       |
| 5231        | CakSNP5231     | <i>Kabuli</i>    | Ca_Kabuli_Chr04              | 2676174                        | (C/T)       |
| 5232        | CakSNP5232     | <i>Kabuli</i>    | Ca_Kabuli_Chr04              | 2740041                        | (T/G)       |
| 5233        | CakSNP5233     | <i>Kabuli</i>    | Ca_Kabuli_Chr04              | 2740068                        | (A/T)       |
| 5234        | CakSNP5234     | <i>Kabuli</i>    | Ca_Kabuli_Chr04              | 2740065                        | (A/G)       |
| 5235        | CakSNP5235     | <i>Kabuli</i>    | Ca_Kabuli_Chr04              | 2752538                        | (G/A)       |
| 5236        | CakSNP5236     | <i>Kabuli</i>    | Ca_Kabuli_Chr04              | 2752568                        | (C/T)       |
| 5237        | CakSNP5237     | <i>Kabuli</i>    | Ca_Kabuli_Chr04              | 2886775                        | (T/G)       |
| 5238        | CakSNP5238     | <i>Kabuli</i>    | Ca_Kabuli_Chr04              | 2886863                        | (C/T)       |
| 5239        | CakSNP5239     | <i>Kabuli</i>    | Ca_Kabuli_Chr04              | 2978875                        | (T/C)       |
| 5240        | CakSNP5240     | <i>Kabuli</i>    | Ca_Kabuli_Chr04              | 2978876                        | (T/G)       |
| 5241        | CakSNP5241     | <i>Kabuli</i>    | Ca_Kabuli_Chr04              | 2978882                        | (G/T)       |
| 5242        | CakSNP5242     | <i>Kabuli</i>    | Ca_Kabuli_Chr04              | 2978932                        | (A/C)       |
| 5243        | CakSNP5243     | <i>Kabuli</i>    | Ca_Kabuli_Chr04              | 2978931                        | (A/T)       |

| <b>S.N.</b> | <b>SNP IDs</b> | <b>Cultivars</b> | <b>Chromosomes/scaffolds</b> | <b>Physical positions (bp)</b> | <b>SNPs</b> |
|-------------|----------------|------------------|------------------------------|--------------------------------|-------------|
| 5244        | CakSNP5244     | <i>Kabuli</i>    | Ca_Kabuli_Chr04              | 3002755                        | (A/G)       |
| 5245        | CakSNP5245     | <i>Kabuli</i>    | Ca_Kabuli_Chr04              | 3002810                        | (T/C)       |
| 5246        | CakSNP5246     | <i>Kabuli</i>    | Ca_Kabuli_Chr04              | 3037899                        | (A/C)       |
| 5247        | CakSNP5247     | <i>Kabuli</i>    | Ca_Kabuli_Chr04              | 3037986                        | (T/A)       |
| 5248        | CakSNP5248     | <i>Kabuli</i>    | Ca_Kabuli_Chr04              | 3037929                        | (T/G)       |
| 5249        | CakSNP5249     | <i>Kabuli</i>    | Ca_Kabuli_Chr04              | 3038022                        | (C/T)       |
| 5250        | CakSNP5250     | <i>Kabuli</i>    | Ca_Kabuli_Chr04              | 3046920                        | (A/G)       |
| 5251        | CakSNP5251     | <i>Kabuli</i>    | Ca_Kabuli_Chr04              | 3144454                        | (T/C)       |
| 5252        | CakSNP5252     | <i>Kabuli</i>    | Ca_Kabuli_Chr04              | 3158321                        | (A/G)       |
| 5253        | CakSNP5253     | <i>Kabuli</i>    | Ca_Kabuli_Chr04              | 3158323                        | (T/G)       |
| 5254        | CakSNP5254     | <i>Kabuli</i>    | Ca_Kabuli_Chr04              | 3158328                        | (G/T)       |
| 5255        | CakSNP5255     | <i>Kabuli</i>    | Ca_Kabuli_Chr04              | 3158331                        | (A/T)       |
| 5256        | CakSNP5256     | <i>Kabuli</i>    | Ca_Kabuli_Chr04              | 3158426                        | (G/A)       |
| 5257        | CakSNP5257     | <i>Kabuli</i>    | Ca_Kabuli_Chr04              | 3158504                        | (A/T)       |
| 5258        | CakSNP5258     | <i>Kabuli</i>    | Ca_Kabuli_Chr04              | 3158506                        | (T/C)       |
| 5259        | CakSNP5259     | <i>Kabuli</i>    | Ca_Kabuli_Chr04              | 3158549                        | (A/G)       |
| 5260        | CakSNP5260     | <i>Kabuli</i>    | Ca_Kabuli_Chr04              | 3164115                        | (G/A)       |
| 5261        | CakSNP5261     | <i>Kabuli</i>    | Ca_Kabuli_Chr04              | 3164083                        | (G/A)       |
| 5262        | CakSNP5262     | <i>Kabuli</i>    | Ca_Kabuli_Chr04              | 3166657                        | (C/T)       |
| 5263        | CakSNP5263     | <i>Kabuli</i>    | Ca_Kabuli_Chr04              | 3166663                        | (C/T)       |
| 5264        | CakSNP5264     | <i>Kabuli</i>    | Ca_Kabuli_Chr04              | 3166674                        | (G/T)       |
| 5265        | CakSNP5265     | <i>Kabuli</i>    | Ca_Kabuli_Chr04              | 3171162                        | (G/A)       |
| 5266        | CakSNP5266     | <i>Kabuli</i>    | Ca_Kabuli_Chr04              | 3171384                        | (T/G)       |
| 5267        | CakSNP5267     | <i>Kabuli</i>    | Ca_Kabuli_Chr04              | 3171385                        | (A/G)       |
| 5268        | CakSNP5268     | <i>Kabuli</i>    | Ca_Kabuli_Chr04              | 3171428                        | (T/C)       |
| 5269        | CakSNP5269     | <i>Kabuli</i>    | Ca_Kabuli_Chr04              | 3171551                        | (C/T)       |
| 5270        | CakSNP5270     | <i>Kabuli</i>    | Ca_Kabuli_Chr04              | 3264351                        | (T/C)       |
| 5271        | CakSNP5271     | <i>Kabuli</i>    | Ca_Kabuli_Chr04              | 3280147                        | (G/A)       |
| 5272        | CakSNP5272     | <i>Kabuli</i>    | Ca_Kabuli_Chr04              | 3280217                        | (A/G)       |
| 5273        | CakSNP5273     | <i>Kabuli</i>    | Ca_Kabuli_Chr04              | 3281050                        | (T/G)       |
| 5274        | CakSNP5274     | <i>Kabuli</i>    | Ca_Kabuli_Chr04              | 3290298                        | (T/G)       |
| 5275        | CakSNP5275     | <i>Kabuli</i>    | Ca_Kabuli_Chr04              | 3353106                        | (T/C)       |
| 5276        | CakSNP5276     | <i>Kabuli</i>    | Ca_Kabuli_Chr04              | 3356252                        | (C/G)       |
| 5277        | CakSNP5277     | <i>Kabuli</i>    | Ca_Kabuli_Chr04              | 3356242                        | (C/G)       |
| 5278        | CakSNP5278     | <i>Kabuli</i>    | Ca_Kabuli_Chr04              | 3400828                        | (G/C)       |
| 5279        | CakSNP5279     | <i>Kabuli</i>    | Ca_Kabuli_Chr04              | 3427396                        | (A/G)       |
| 5280        | CakSNP5280     | <i>Kabuli</i>    | Ca_Kabuli_Chr04              | 3429035                        | (G/A)       |
| 5281        | CakSNP5281     | <i>Kabuli</i>    | Ca_Kabuli_Chr04              | 3429059                        | (C/A)       |

| <b>S.N.</b> | <b>SNP IDs</b> | <b>Cultivars</b> | <b>Chromosomes/scaffolds</b> | <b>Physical positions (bp)</b> | <b>SNPs</b> |
|-------------|----------------|------------------|------------------------------|--------------------------------|-------------|
| 5282        | CakSNP5282     | <i>Kabuli</i>    | Ca_Kabuli_Chr04              | 3455029                        | (T/C)       |
| 5283        | CakSNP5283     | <i>Kabuli</i>    | Ca_Kabuli_Chr04              | 3455047                        | (G/A)       |
| 5284        | CakSNP5284     | <i>Kabuli</i>    | Ca_Kabuli_Chr04              | 3456450                        | (G/T)       |
| 5285        | CakSNP5285     | <i>Kabuli</i>    | Ca_Kabuli_Chr04              | 3456501                        | (C/T)       |
| 5286        | CakSNP5286     | <i>Kabuli</i>    | Ca_Kabuli_Chr04              | 3483687                        | (A/C)       |
| 5287        | CakSNP5287     | <i>Kabuli</i>    | Ca_Kabuli_Chr04              | 3627810                        | (G/T)       |
| 5288        | CakSNP5288     | <i>Kabuli</i>    | Ca_Kabuli_Chr04              | 3642051                        | (A/T)       |
| 5289        | CakSNP5289     | <i>Kabuli</i>    | Ca_Kabuli_Chr04              | 3642070                        | (T/C)       |
| 5290        | CakSNP5290     | <i>Kabuli</i>    | Ca_Kabuli_Chr04              | 3642116                        | (A/T)       |
| 5291        | CakSNP5291     | <i>Kabuli</i>    | Ca_Kabuli_Chr04              | 3689840                        | (T/C)       |
| 5292        | CakSNP5292     | <i>Kabuli</i>    | Ca_Kabuli_Chr04              | 3689871                        | (G/A)       |
| 5293        | CakSNP5293     | <i>Kabuli</i>    | Ca_Kabuli_Chr04              | 3739386                        | (C/A)       |
| 5294        | CakSNP5294     | <i>Kabuli</i>    | Ca_Kabuli_Chr04              | 3741522                        | (T/G)       |
| 5295        | CakSNP5295     | <i>Kabuli</i>    | Ca_Kabuli_Chr04              | 3741539                        | (T/G)       |
| 5296        | CakSNP5296     | <i>Kabuli</i>    | Ca_Kabuli_Chr04              | 3752141                        | (C/G)       |
| 5297        | CakSNP5297     | <i>Kabuli</i>    | Ca_Kabuli_Chr04              | 3762559                        | (T/C)       |
| 5298        | CakSNP5298     | <i>Kabuli</i>    | Ca_Kabuli_Chr04              | 3762561                        | (C/A)       |
| 5299        | CakSNP5299     | <i>Kabuli</i>    | Ca_Kabuli_Chr04              | 3762585                        | (G/T)       |
| 5300        | CakSNP5300     | <i>Kabuli</i>    | Ca_Kabuli_Chr04              | 3794764                        | (G/A)       |
| 5301        | CakSNP5301     | <i>Kabuli</i>    | Ca_Kabuli_Chr04              | 3794885                        | (C/A)       |
| 5302        | CakSNP5302     | <i>Kabuli</i>    | Ca_Kabuli_Chr04              | 3885444                        | (G/C)       |
| 5303        | CakSNP5303     | <i>Kabuli</i>    | Ca_Kabuli_Chr04              | 3888010                        | (G/C)       |
| 5304        | CakSNP5304     | <i>Kabuli</i>    | Ca_Kabuli_Chr04              | 3888053                        | (C/A)       |
| 5305        | CakSNP5305     | <i>Kabuli</i>    | Ca_Kabuli_Chr04              | 3888164                        | (T/A)       |
| 5306        | CakSNP5306     | <i>Kabuli</i>    | Ca_Kabuli_Chr04              | 3888185                        | (A/G)       |
| 5307        | CakSNP5307     | <i>Kabuli</i>    | Ca_Kabuli_Chr04              | 3888236                        | (A/G)       |
| 5308        | CakSNP5308     | <i>Kabuli</i>    | Ca_Kabuli_Chr04              | 3888328                        | (C/T)       |
| 5309        | CakSNP5309     | <i>Kabuli</i>    | Ca_Kabuli_Chr04              | 3888462                        | (T/C)       |
| 5310        | CakSNP5310     | <i>Kabuli</i>    | Ca_Kabuli_Chr04              | 3888510                        | (G/A)       |
| 5311        | CakSNP5311     | <i>Kabuli</i>    | Ca_Kabuli_Chr04              | 3888514                        | (G/A)       |
| 5312        | CakSNP5312     | <i>Kabuli</i>    | Ca_Kabuli_Chr04              | 3888529                        | (T/G)       |
| 5313        | CakSNP5313     | <i>Kabuli</i>    | Ca_Kabuli_Chr04              | 3890556                        | (A/G)       |
| 5314        | CakSNP5314     | <i>Kabuli</i>    | Ca_Kabuli_Chr04              | 3890709                        | (A/G)       |
| 5315        | CakSNP5315     | <i>Kabuli</i>    | Ca_Kabuli_Chr04              | 3990810                        | (C/G)       |
| 5316        | CakSNP5316     | <i>Kabuli</i>    | Ca_Kabuli_Chr04              | 3990809                        | (G/A)       |
| 5317        | CakSNP5317     | <i>Kabuli</i>    | Ca_Kabuli_Chr04              | 4002917                        | (T/C)       |
| 5318        | CakSNP5318     | <i>Kabuli</i>    | Ca_Kabuli_Chr04              | 4006213                        | (A/C)       |
| 5319        | CakSNP5319     | <i>Kabuli</i>    | Ca_Kabuli_Chr04              | 4027829                        | (A/T)       |

| <b>S.N.</b> | <b>SNP IDs</b> | <b>Cultivars</b> | <b>Chromosomes/scaffolds</b> | <b>Physical positions (bp)</b> | <b>SNPs</b> |
|-------------|----------------|------------------|------------------------------|--------------------------------|-------------|
| 5320        | CakSNP5320     | <i>Kabuli</i>    | Ca_Kabuli_Chr04              | 4027872                        | (A/C)       |
| 5321        | CakSNP5321     | <i>Kabuli</i>    | Ca_Kabuli_Chr04              | 4097989                        | (G/A)       |
| 5322        | CakSNP5322     | <i>Kabuli</i>    | Ca_Kabuli_Chr04              | 4097935                        | (T/C)       |
| 5323        | CakSNP5323     | <i>Kabuli</i>    | Ca_Kabuli_Chr04              | 4116386                        | (G/C)       |
| 5324        | CakSNP5324     | <i>Kabuli</i>    | Ca_Kabuli_Chr04              | 4148061                        | (T/C)       |
| 5325        | CakSNP5325     | <i>Kabuli</i>    | Ca_Kabuli_Chr04              | 4148250                        | (A/G)       |
| 5326        | CakSNP5326     | <i>Kabuli</i>    | Ca_Kabuli_Chr04              | 4154417                        | (A/C)       |
| 5327        | CakSNP5327     | <i>Kabuli</i>    | Ca_Kabuli_Chr04              | 4154507                        | (G/T)       |
| 5328        | CakSNP5328     | <i>Kabuli</i>    | Ca_Kabuli_Chr04              | 4229295                        | (T/A)       |
| 5329        | CakSNP5329     | <i>Kabuli</i>    | Ca_Kabuli_Chr04              | 4229345                        | (C/T)       |
| 5330        | CakSNP5330     | <i>Kabuli</i>    | Ca_Kabuli_Chr04              | 4229381                        | (T/C)       |
| 5331        | CakSNP5331     | <i>Kabuli</i>    | Ca_Kabuli_Chr04              | 4229371                        | (C/T)       |
| 5332        | CakSNP5332     | <i>Kabuli</i>    | Ca_Kabuli_Chr04              | 4255863                        | (T/G)       |
| 5333        | CakSNP5333     | <i>Kabuli</i>    | Ca_Kabuli_Chr04              | 4256023                        | (C/T)       |
| 5334        | CakSNP5334     | <i>Kabuli</i>    | Ca_Kabuli_Chr04              | 4258002                        | (A/G)       |
| 5335        | CakSNP5335     | <i>Kabuli</i>    | Ca_Kabuli_Chr04              | 4258149                        | (A/G)       |
| 5336        | CakSNP5336     | <i>Kabuli</i>    | Ca_Kabuli_Chr04              | 4305891                        | (A/C)       |
| 5337        | CakSNP5337     | <i>Kabuli</i>    | Ca_Kabuli_Chr04              | 4320615                        | (C/T)       |
| 5338        | CakSNP5338     | <i>Kabuli</i>    | Ca_Kabuli_Chr04              | 4320743                        | (A/G)       |
| 5339        | CakSNP5339     | <i>Kabuli</i>    | Ca_Kabuli_Chr04              | 4327268                        | (A/G)       |
| 5340        | CakSNP5340     | <i>Kabuli</i>    | Ca_Kabuli_Chr04              | 4334307                        | (T/G)       |
| 5341        | CakSNP5341     | <i>Kabuli</i>    | Ca_Kabuli_Chr04              | 4343586                        | (C/T)       |
| 5342        | CakSNP5342     | <i>Kabuli</i>    | Ca_Kabuli_Chr04              | 4343540                        | (C/A)       |
| 5343        | CakSNP5343     | <i>Kabuli</i>    | Ca_Kabuli_Chr04              | 4410351                        | (T/C)       |
| 5344        | CakSNP5344     | <i>Kabuli</i>    | Ca_Kabuli_Chr04              | 4426659                        | (C/T)       |
| 5345        | CakSNP5345     | <i>Kabuli</i>    | Ca_Kabuli_Chr04              | 4426760                        | (T/C)       |
| 5346        | CakSNP5346     | <i>Kabuli</i>    | Ca_Kabuli_Chr04              | 4435621                        | (T/C)       |
| 5347        | CakSNP5347     | <i>Kabuli</i>    | Ca_Kabuli_Chr04              | 4451928                        | (T/C)       |
| 5348        | CakSNP5348     | <i>Kabuli</i>    | Ca_Kabuli_Chr04              | 4452018                        | (T/A)       |
| 5349        | CakSNP5349     | <i>Kabuli</i>    | Ca_Kabuli_Chr04              | 4452380                        | (C/G)       |
| 5350        | CakSNP5350     | <i>Kabuli</i>    | Ca_Kabuli_Chr04              | 4454305                        | (A/C)       |
| 5351        | CakSNP5351     | <i>Kabuli</i>    | Ca_Kabuli_Chr04              | 4454464                        | (A/G)       |
| 5352        | CakSNP5352     | <i>Kabuli</i>    | Ca_Kabuli_Chr04              | 4461562                        | (G/C)       |
| 5353        | CakSNP5353     | <i>Kabuli</i>    | Ca_Kabuli_Chr04              | 4468394                        | (C/T)       |
| 5354        | CakSNP5354     | <i>Kabuli</i>    | Ca_Kabuli_Chr04              | 4536310                        | (A/G)       |
| 5355        | CakSNP5355     | <i>Kabuli</i>    | Ca_Kabuli_Chr04              | 4536286                        | (G/C)       |
| 5356        | CakSNP5356     | <i>Kabuli</i>    | Ca_Kabuli_Chr04              | 4578836                        | (C/T)       |
| 5357        | CakSNP5357     | <i>Kabuli</i>    | Ca_Kabuli_Chr04              | 4579274                        | (C/T)       |

| <b>S.N.</b> | <b>SNP IDs</b> | <b>Cultivars</b> | <b>Chromosomes/scaffolds</b> | <b>Physical positions (bp)</b> | <b>SNPs</b> |
|-------------|----------------|------------------|------------------------------|--------------------------------|-------------|
| 5358        | CakSNP5358     | <i>Kabuli</i>    | Ca_Kabuli_Chr04              | 4605340                        | (A/C)       |
| 5359        | CakSNP5359     | <i>Kabuli</i>    | Ca_Kabuli_Chr04              | 4622932                        | (T/G)       |
| 5360        | CakSNP5360     | <i>Kabuli</i>    | Ca_Kabuli_Chr04              | 4622913                        | (C/T)       |
| 5361        | CakSNP5361     | <i>Kabuli</i>    | Ca_Kabuli_Chr04              | 4628221                        | (T/G)       |
| 5362        | CakSNP5362     | <i>Kabuli</i>    | Ca_Kabuli_Chr04              | 4628232                        | (G/A)       |
| 5363        | CakSNP5363     | <i>Kabuli</i>    | Ca_Kabuli_Chr04              | 4628240                        | (C/T)       |
| 5364        | CakSNP5364     | <i>Kabuli</i>    | Ca_Kabuli_Chr04              | 4628243                        | (G/A)       |
| 5365        | CakSNP5365     | <i>Kabuli</i>    | Ca_Kabuli_Chr04              | 4628309                        | (C/T)       |
| 5366        | CakSNP5366     | <i>Kabuli</i>    | Ca_Kabuli_Chr04              | 4630407                        | (G/A)       |
| 5367        | CakSNP5367     | <i>Kabuli</i>    | Ca_Kabuli_Chr04              | 4630419                        | (A/C)       |
| 5368        | CakSNP5368     | <i>Kabuli</i>    | Ca_Kabuli_Chr04              | 4630514                        | (T/C)       |
| 5369        | CakSNP5369     | <i>Kabuli</i>    | Ca_Kabuli_Chr04              | 4633913                        | (T/G)       |
| 5370        | CakSNP5370     | <i>Kabuli</i>    | Ca_Kabuli_Chr04              | 4634542                        | (A/T)       |
| 5371        | CakSNP5371     | <i>Kabuli</i>    | Ca_Kabuli_Chr04              | 4660220                        | (A/G)       |
| 5372        | CakSNP5372     | <i>Kabuli</i>    | Ca_Kabuli_Chr04              | 4670913                        | (A/G)       |
| 5373        | CakSNP5373     | <i>Kabuli</i>    | Ca_Kabuli_Chr04              | 4670975                        | (C/A)       |
| 5374        | CakSNP5374     | <i>Kabuli</i>    | Ca_Kabuli_Chr04              | 4675182                        | (T/G)       |
| 5375        | CakSNP5375     | <i>Kabuli</i>    | Ca_Kabuli_Chr04              | 4675177                        | (T/A)       |
| 5376        | CakSNP5376     | <i>Kabuli</i>    | Ca_Kabuli_Chr04              | 4675176                        | (T/G)       |
| 5377        | CakSNP5377     | <i>Kabuli</i>    | Ca_Kabuli_Chr04              | 4675172                        | (T/A)       |
| 5378        | CakSNP5378     | <i>Kabuli</i>    | Ca_Kabuli_Chr04              | 4675171                        | (T/A)       |
| 5379        | CakSNP5379     | <i>Kabuli</i>    | Ca_Kabuli_Chr04              | 4675166                        | (A/T)       |
| 5380        | CakSNP5380     | <i>Kabuli</i>    | Ca_Kabuli_Chr04              | 4679236                        | (A/G)       |
| 5381        | CakSNP5381     | <i>Kabuli</i>    | Ca_Kabuli_Chr04              | 4707682                        | (A/G)       |
| 5382        | CakSNP5382     | <i>Kabuli</i>    | Ca_Kabuli_Chr04              | 4722348                        | (G/A)       |
| 5383        | CakSNP5383     | <i>Kabuli</i>    | Ca_Kabuli_Chr04              | 4757357                        | (T/C)       |
| 5384        | CakSNP5384     | <i>Kabuli</i>    | Ca_Kabuli_Chr04              | 4757416                        | (G/A)       |
| 5385        | CakSNP5385     | <i>Kabuli</i>    | Ca_Kabuli_Chr04              | 4757498                        | (C/G)       |
| 5386        | CakSNP5386     | <i>Kabuli</i>    | Ca_Kabuli_Chr04              | 4794122                        | (G/A)       |
| 5387        | CakSNP5387     | <i>Kabuli</i>    | Ca_Kabuli_Chr04              | 4794192                        | (G/C)       |
| 5388        | CakSNP5388     | <i>Kabuli</i>    | Ca_Kabuli_Chr04              | 4799122                        | (C/T)       |
| 5389        | CakSNP5389     | <i>Kabuli</i>    | Ca_Kabuli_Chr04              | 4799116                        | (C/T)       |
| 5390        | CakSNP5390     | <i>Kabuli</i>    | Ca_Kabuli_Chr04              | 4803168                        | (T/A)       |
| 5391        | CakSNP5391     | <i>Kabuli</i>    | Ca_Kabuli_Chr04              | 4803213                        | (C/T)       |
| 5392        | CakSNP5392     | <i>Kabuli</i>    | Ca_Kabuli_Chr04              | 4874780                        | (A/T)       |
| 5393        | CakSNP5393     | <i>Kabuli</i>    | Ca_Kabuli_Chr04              | 4874782                        | (C/A)       |
| 5394        | CakSNP5394     | <i>Kabuli</i>    | Ca_Kabuli_Chr04              | 4874836                        | (C/T)       |
| 5395        | CakSNP5395     | <i>Kabuli</i>    | Ca_Kabuli_Chr04              | 4882813                        | (C/G)       |



| <b>S.N.</b> | <b>SNP IDs</b> | <b>Cultivars</b> | <b>Chromosomes/scaffolds</b> | <b>Physical positions (bp)</b> | <b>SNPs</b> |
|-------------|----------------|------------------|------------------------------|--------------------------------|-------------|
| 5396        | CakSNP5396     | <i>Kabuli</i>    | Ca_Kabuli_Chr04              | 4897934                        | (C/G)       |
| 5397        | CakSNP5397     | <i>Kabuli</i>    | Ca_Kabuli_Chr04              | 4907987                        | (G/A)       |
| 5398        | CakSNP5398     | <i>Kabuli</i>    | Ca_Kabuli_Chr04              | 4911083                        | (T/C)       |
| 5399        | CakSNP5399     | <i>Kabuli</i>    | Ca_Kabuli_Chr04              | 4911130                        | (T/C)       |
| 5400        | CakSNP5400     | <i>Kabuli</i>    | Ca_Kabuli_Chr04              | 4911209                        | (A/G)       |
| 5401        | CakSNP5401     | <i>Kabuli</i>    | Ca_Kabuli_Chr04              | 4911217                        | (A/C)       |
| 5402        | CakSNP5402     | <i>Kabuli</i>    | Ca_Kabuli_Chr04              | 4920706                        | (T/C)       |
| 5403        | CakSNP5403     | <i>Kabuli</i>    | Ca_Kabuli_Chr04              | 4920712                        | (A/T)       |
| 5404        | CakSNP5404     | <i>Kabuli</i>    | Ca_Kabuli_Chr04              | 4920719                        | (A/G)       |
| 5405        | CakSNP5405     | <i>Kabuli</i>    | Ca_Kabuli_Chr04              | 4922290                        | (A/C)       |
| 5406        | CakSNP5406     | <i>Kabuli</i>    | Ca_Kabuli_Chr04              | 4928764                        | (T/C)       |
| 5407        | CakSNP5407     | <i>Kabuli</i>    | Ca_Kabuli_Chr04              | 4928890                        | (A/G)       |
| 5408        | CakSNP5408     | <i>Kabuli</i>    | Ca_Kabuli_Chr04              | 4929387                        | (T/C)       |
| 5409        | CakSNP5409     | <i>Kabuli</i>    | Ca_Kabuli_Chr04              | 4953629                        | (C/A)       |
| 5410        | CakSNP5410     | <i>Kabuli</i>    | Ca_Kabuli_Chr04              | 4967336                        | (T/C)       |
| 5411        | CakSNP5411     | <i>Kabuli</i>    | Ca_Kabuli_Chr04              | 4967342                        | (G/A)       |
| 5412        | CakSNP5412     | <i>Kabuli</i>    | Ca_Kabuli_Chr04              | 4967347                        | (A/G)       |
| 5413        | CakSNP5413     | <i>Kabuli</i>    | Ca_Kabuli_Chr04              | 5018591                        | (G/A)       |
| 5414        | CakSNP5414     | <i>Kabuli</i>    | Ca_Kabuli_Chr04              | 5038300                        | (G/C)       |
| 5415        | CakSNP5415     | <i>Kabuli</i>    | Ca_Kabuli_Chr04              | 5051617                        | (A/G)       |
| 5416        | CakSNP5416     | <i>Kabuli</i>    | Ca_Kabuli_Chr04              | 5051574                        | (T/G)       |
| 5417        | CakSNP5417     | <i>Kabuli</i>    | Ca_Kabuli_Chr04              | 5051573                        | (A/C)       |
| 5418        | CakSNP5418     | <i>Kabuli</i>    | Ca_Kabuli_Chr04              | 5086705                        | (T/C)       |
| 5419        | CakSNP5419     | <i>Kabuli</i>    | Ca_Kabuli_Chr04              | 5120207                        | (C/T)       |
| 5420        | CakSNP5420     | <i>Kabuli</i>    | Ca_Kabuli_Chr04              | 5186401                        | (A/G)       |
| 5421        | CakSNP5421     | <i>Kabuli</i>    | Ca_Kabuli_Chr04              | 5187402                        | (G/C)       |
| 5422        | CakSNP5422     | <i>Kabuli</i>    | Ca_Kabuli_Chr04              | 5187344                        | (C/G)       |
| 5423        | CakSNP5423     | <i>Kabuli</i>    | Ca_Kabuli_Chr04              | 5188084                        | (G/A)       |
| 5424        | CakSNP5424     | <i>Kabuli</i>    | Ca_Kabuli_Chr04              | 5188040                        | (A/G)       |
| 5425        | CakSNP5425     | <i>Kabuli</i>    | Ca_Kabuli_Chr04              | 5197824                        | (T/C)       |
| 5426        | CakSNP5426     | <i>Kabuli</i>    | Ca_Kabuli_Chr04              | 5199907                        | (C/T)       |
| 5427        | CakSNP5427     | <i>Kabuli</i>    | Ca_Kabuli_Chr04              | 5222669                        | (A/C)       |
| 5428        | CakSNP5428     | <i>Kabuli</i>    | Ca_Kabuli_Chr04              | 5222805                        | (G/C)       |
| 5429        | CakSNP5429     | <i>Kabuli</i>    | Ca_Kabuli_Chr04              | 5222851                        | (C/T)       |
| 5430        | CakSNP5430     | <i>Kabuli</i>    | Ca_Kabuli_Chr04              | 5223100                        | (G/A)       |
| 5431        | CakSNP5431     | <i>Kabuli</i>    | Ca_Kabuli_Chr04              | 5223206                        | (A/T)       |
| 5432        | CakSNP5432     | <i>Kabuli</i>    | Ca_Kabuli_Chr04              | 5228950                        | (G/T)       |
| 5433        | CakSNP5433     | <i>Kabuli</i>    | Ca_Kabuli_Chr04              | 5232364                        | (T/C)       |

| <b>S.N.</b> | <b>SNP IDs</b> | <b>Cultivars</b> | <b>Chromosomes/scaffolds</b> | <b>Physical positions (bp)</b> | <b>SNPs</b> |
|-------------|----------------|------------------|------------------------------|--------------------------------|-------------|
| 5434        | CakSNP5434     | <i>Kabuli</i>    | Ca_Kabuli_Chr04              | 5263199                        | (A/G)       |
| 5435        | CakSNP5435     | <i>Kabuli</i>    | Ca_Kabuli_Chr04              | 5268995                        | (A/C)       |
| 5436        | CakSNP5436     | <i>Kabuli</i>    | Ca_Kabuli_Chr04              | 5282131                        | (T/C)       |
| 5437        | CakSNP5437     | <i>Kabuli</i>    | Ca_Kabuli_Chr04              | 5310873                        | (A/G)       |
| 5438        | CakSNP5438     | <i>Kabuli</i>    | Ca_Kabuli_Chr04              | 5345520                        | (T/G)       |
| 5439        | CakSNP5439     | <i>Kabuli</i>    | Ca_Kabuli_Chr04              | 5377067                        | (A/C)       |
| 5440        | CakSNP5440     | <i>Kabuli</i>    | Ca_Kabuli_Chr04              | 5377400                        | (C/T)       |
| 5441        | CakSNP5441     | <i>Kabuli</i>    | Ca_Kabuli_Chr04              | 5390236                        | (C/A)       |
| 5442        | CakSNP5442     | <i>Kabuli</i>    | Ca_Kabuli_Chr04              | 5390317                        | (G/A)       |
| 5443        | CakSNP5443     | <i>Kabuli</i>    | Ca_Kabuli_Chr04              | 5453008                        | (A/C)       |
| 5444        | CakSNP5444     | <i>Kabuli</i>    | Ca_Kabuli_Chr04              | 5473174                        | (C/T)       |
| 5445        | CakSNP5445     | <i>Kabuli</i>    | Ca_Kabuli_Chr04              | 5484259                        | (G/T)       |
| 5446        | CakSNP5446     | <i>Kabuli</i>    | Ca_Kabuli_Chr04              | 5484257                        | (G/C)       |
| 5447        | CakSNP5447     | <i>Kabuli</i>    | Ca_Kabuli_Chr04              | 5484238                        | (G/A)       |
| 5448        | CakSNP5448     | <i>Kabuli</i>    | Ca_Kabuli_Chr04              | 5484236                        | (C/T)       |
| 5449        | CakSNP5449     | <i>Kabuli</i>    | Ca_Kabuli_Chr04              | 5484220                        | (A/G)       |
| 5450        | CakSNP5450     | <i>Kabuli</i>    | Ca_Kabuli_Chr04              | 5485052                        | (G/T)       |
| 5451        | CakSNP5451     | <i>Kabuli</i>    | Ca_Kabuli_Chr04              | 5485050                        | (G/C)       |
| 5452        | CakSNP5452     | <i>Kabuli</i>    | Ca_Kabuli_Chr04              | 5485031                        | (G/A)       |
| 5453        | CakSNP5453     | <i>Kabuli</i>    | Ca_Kabuli_Chr04              | 5485029                        | (C/T)       |
| 5454        | CakSNP5454     | <i>Kabuli</i>    | Ca_Kabuli_Chr04              | 5485013                        | (A/G)       |
| 5455        | CakSNP5455     | <i>Kabuli</i>    | Ca_Kabuli_Chr04              | 5528421                        | (T/G)       |
| 5456        | CakSNP5456     | <i>Kabuli</i>    | Ca_Kabuli_Chr04              | 5530612                        | (A/G)       |
| 5457        | CakSNP5457     | <i>Kabuli</i>    | Ca_Kabuli_Chr04              | 5535661                        | (A/G)       |
| 5458        | CakSNP5458     | <i>Kabuli</i>    | Ca_Kabuli_Chr04              | 5575846                        | (G/C)       |
| 5459        | CakSNP5459     | <i>Kabuli</i>    | Ca_Kabuli_Chr04              | 5595079                        | (T/C)       |
| 5460        | CakSNP5460     | <i>Kabuli</i>    | Ca_Kabuli_Chr04              | 5595077                        | (T/A)       |
| 5461        | CakSNP5461     | <i>Kabuli</i>    | Ca_Kabuli_Chr04              | 5623571                        | (A/G)       |
| 5462        | CakSNP5462     | <i>Kabuli</i>    | Ca_Kabuli_Chr04              | 5627096                        | (C/T)       |
| 5463        | CakSNP5463     | <i>Kabuli</i>    | Ca_Kabuli_Chr04              | 5701873                        | (A/C)       |
| 5464        | CakSNP5464     | <i>Kabuli</i>    | Ca_Kabuli_Chr04              | 5701900                        | (G/T)       |
| 5465        | CakSNP5465     | <i>Kabuli</i>    | Ca_Kabuli_Chr04              | 5701902                        | (C/T)       |
| 5466        | CakSNP5466     | <i>Kabuli</i>    | Ca_Kabuli_Chr04              | 5701907                        | (G/T)       |
| 5467        | CakSNP5467     | <i>Kabuli</i>    | Ca_Kabuli_Chr04              | 5779698                        | (A/G)       |
| 5468        | CakSNP5468     | <i>Kabuli</i>    | Ca_Kabuli_Chr04              | 5779765                        | (A/T)       |
| 5469        | CakSNP5469     | <i>Kabuli</i>    | Ca_Kabuli_Chr04              | 5787727                        | (G/A)       |
| 5470        | CakSNP5470     | <i>Kabuli</i>    | Ca_Kabuli_Chr04              | 5787722                        | (G/A)       |
| 5471        | CakSNP5471     | <i>Kabuli</i>    | Ca_Kabuli_Chr04              | 5841444                        | (C/G)       |

| <b>S.N.</b> | <b>SNP IDs</b> | <b>Cultivars</b> | <b>Chromosomes/scaffolds</b> | <b>Physical positions (bp)</b> | <b>SNPs</b> |
|-------------|----------------|------------------|------------------------------|--------------------------------|-------------|
| 5472        | CakSNP5472     | <i>Kabuli</i>    | Ca_Kabuli_Chr04              | 5841462                        | (A/C)       |
| 5473        | CakSNP5473     | <i>Kabuli</i>    | Ca_Kabuli_Chr04              | 5853789                        | (C/T)       |
| 5474        | CakSNP5474     | <i>Kabuli</i>    | Ca_Kabuli_Chr04              | 5853798                        | (T/G)       |
| 5475        | CakSNP5475     | <i>Kabuli</i>    | Ca_Kabuli_Chr04              | 5900194                        | (C/A)       |
| 5476        | CakSNP5476     | <i>Kabuli</i>    | Ca_Kabuli_Chr04              | 5900290                        | (T/C)       |
| 5477        | CakSNP5477     | <i>Kabuli</i>    | Ca_Kabuli_Chr04              | 5905252                        | (C/T)       |
| 5478        | CakSNP5478     | <i>Kabuli</i>    | Ca_Kabuli_Chr04              | 5905276                        | (C/T)       |
| 5479        | CakSNP5479     | <i>Kabuli</i>    | Ca_Kabuli_Chr04              | 5905303                        | (A/C)       |
| 5480        | CakSNP5480     | <i>Kabuli</i>    | Ca_Kabuli_Chr04              | 5905385                        | (G/A)       |
| 5481        | CakSNP5481     | <i>Kabuli</i>    | Ca_Kabuli_Chr04              | 5907409                        | (T/G)       |
| 5482        | CakSNP5482     | <i>Kabuli</i>    | Ca_Kabuli_Chr04              | 5907421                        | (T/G)       |
| 5483        | CakSNP5483     | <i>Kabuli</i>    | Ca_Kabuli_Chr04              | 5907437                        | (C/A)       |
| 5484        | CakSNP5484     | <i>Kabuli</i>    | Ca_Kabuli_Chr04              | 5907465                        | (C/A)       |
| 5485        | CakSNP5485     | <i>Kabuli</i>    | Ca_Kabuli_Chr04              | 5940176                        | (C/T)       |
| 5486        | CakSNP5486     | <i>Kabuli</i>    | Ca_Kabuli_Chr04              | 5999964                        | (T/C)       |
| 5487        | CakSNP5487     | <i>Kabuli</i>    | Ca_Kabuli_Chr04              | 6000010                        | (T/A)       |
| 5488        | CakSNP5488     | <i>Kabuli</i>    | Ca_Kabuli_Chr04              | 6000013                        | (A/C)       |
| 5489        | CakSNP5489     | <i>Kabuli</i>    | Ca_Kabuli_Chr04              | 6000037                        | (T/G)       |
| 5490        | CakSNP5490     | <i>Kabuli</i>    | Ca_Kabuli_Chr04              | 6006849                        | (T/G)       |
| 5491        | CakSNP5491     | <i>Kabuli</i>    | Ca_Kabuli_Chr04              | 6030948                        | (T/G)       |
| 5492        | CakSNP5492     | <i>Kabuli</i>    | Ca_Kabuli_Chr04              | 6030966                        | (A/G)       |
| 5493        | CakSNP5493     | <i>Kabuli</i>    | Ca_Kabuli_Chr04              | 6041134                        | (A/C)       |
| 5494        | CakSNP5494     | <i>Kabuli</i>    | Ca_Kabuli_Chr04              | 6041130                        | (C/A)       |
| 5495        | CakSNP5495     | <i>Kabuli</i>    | Ca_Kabuli_Chr04              | 6041126                        | (A/G)       |
| 5496        | CakSNP5496     | <i>Kabuli</i>    | Ca_Kabuli_Chr04              | 6041120                        | (G/T)       |
| 5497        | CakSNP5497     | <i>Kabuli</i>    | Ca_Kabuli_Chr04              | 6041117                        | (C/T)       |
| 5498        | CakSNP5498     | <i>Kabuli</i>    | Ca_Kabuli_Chr04              | 6076530                        | (T/C)       |
| 5499        | CakSNP5499     | <i>Kabuli</i>    | Ca_Kabuli_Chr04              | 6076594                        | (G/C)       |
| 5500        | CakSNP5500     | <i>Kabuli</i>    | Ca_Kabuli_Chr04              | 6076614                        | (A/G)       |
| 5501        | CakSNP5501     | <i>Kabuli</i>    | Ca_Kabuli_Chr04              | 6077103                        | (G/A)       |
| 5502        | CakSNP5502     | <i>Kabuli</i>    | Ca_Kabuli_Chr04              | 6077113                        | (G/T)       |
| 5503        | CakSNP5503     | <i>Kabuli</i>    | Ca_Kabuli_Chr04              | 6077156                        | (G/T)       |
| 5504        | CakSNP5504     | <i>Kabuli</i>    | Ca_Kabuli_Chr04              | 6077168                        | (T/C)       |
| 5505        | CakSNP5505     | <i>Kabuli</i>    | Ca_Kabuli_Chr04              | 6157625                        | (T/C)       |
| 5506        | CakSNP5506     | <i>Kabuli</i>    | Ca_Kabuli_Chr04              | 6201137                        | (T/C)       |
| 5507        | CakSNP5507     | <i>Kabuli</i>    | Ca_Kabuli_Chr04              | 6238354                        | (G/A)       |
| 5508        | CakSNP5508     | <i>Kabuli</i>    | Ca_Kabuli_Chr04              | 6238367                        | (T/A)       |
| 5509        | CakSNP5509     | <i>Kabuli</i>    | Ca_Kabuli_Chr04              | 6238376                        | (A/G)       |

| <b>S.N.</b> | <b>SNP IDs</b> | <b>Cultivars</b> | <b>Chromosomes/scaffolds</b> | <b>Physical positions (bp)</b> | <b>SNPs</b> |
|-------------|----------------|------------------|------------------------------|--------------------------------|-------------|
| 5510        | CakSNP5510     | <i>Kabuli</i>    | Ca_Kabuli_Chr04              | 6238414                        | (T/A)       |
| 5511        | CakSNP5511     | <i>Kabuli</i>    | Ca_Kabuli_Chr04              | 6277398                        | (C/T)       |
| 5512        | CakSNP5512     | <i>Kabuli</i>    | Ca_Kabuli_Chr04              | 6281228                        | (A/C)       |
| 5513        | CakSNP5513     | <i>Kabuli</i>    | Ca_Kabuli_Chr04              | 6296089                        | (G/T)       |
| 5514        | CakSNP5514     | <i>Kabuli</i>    | Ca_Kabuli_Chr04              | 6387938                        | (T/G)       |
| 5515        | CakSNP5515     | <i>Kabuli</i>    | Ca_Kabuli_Chr04              | 6403910                        | (A/C)       |
| 5516        | CakSNP5516     | <i>Kabuli</i>    | Ca_Kabuli_Chr04              | 6408543                        | (T/G)       |
| 5517        | CakSNP5517     | <i>Kabuli</i>    | Ca_Kabuli_Chr04              | 6415058                        | (A/T)       |
| 5518        | CakSNP5518     | <i>Kabuli</i>    | Ca_Kabuli_Chr04              | 6462228                        | (C/T)       |
| 5519        | CakSNP5519     | <i>Kabuli</i>    | Ca_Kabuli_Chr04              | 6507540                        | (G/A)       |
| 5520        | CakSNP5520     | <i>Kabuli</i>    | Ca_Kabuli_Chr04              | 6509701                        | (T/A)       |
| 5521        | CakSNP5521     | <i>Kabuli</i>    | Ca_Kabuli_Chr04              | 6509761                        | (C/A)       |
| 5522        | CakSNP5522     | <i>Kabuli</i>    | Ca_Kabuli_Chr04              | 6511977                        | (C/T)       |
| 5523        | CakSNP5523     | <i>Kabuli</i>    | Ca_Kabuli_Chr04              | 6512060                        | (A/T)       |
| 5524        | CakSNP5524     | <i>Kabuli</i>    | Ca_Kabuli_Chr04              | 6513321                        | (A/T)       |
| 5525        | CakSNP5525     | <i>Kabuli</i>    | Ca_Kabuli_Chr04              | 6513493                        | (C/T)       |
| 5526        | CakSNP5526     | <i>Kabuli</i>    | Ca_Kabuli_Chr04              | 6513576                        | (A/T)       |
| 5527        | CakSNP5527     | <i>Kabuli</i>    | Ca_Kabuli_Chr04              | 6544385                        | (G/A)       |
| 5528        | CakSNP5528     | <i>Kabuli</i>    | Ca_Kabuli_Chr04              | 6544342                        | (A/C)       |
| 5529        | CakSNP5529     | <i>Kabuli</i>    | Ca_Kabuli_Chr04              | 6544337                        | (A/C)       |
| 5530        | CakSNP5530     | <i>Kabuli</i>    | Ca_Kabuli_Chr04              | 6552776                        | (A/G)       |
| 5531        | CakSNP5531     | <i>Kabuli</i>    | Ca_Kabuli_Chr04              | 6562373                        | (T/A)       |
| 5532        | CakSNP5532     | <i>Kabuli</i>    | Ca_Kabuli_Chr04              | 6562391                        | (A/C)       |
| 5533        | CakSNP5533     | <i>Kabuli</i>    | Ca_Kabuli_Chr04              | 6562402                        | (G/C)       |
| 5534        | CakSNP5534     | <i>Kabuli</i>    | Ca_Kabuli_Chr04              | 6611820                        | (G/A)       |
| 5535        | CakSNP5535     | <i>Kabuli</i>    | Ca_Kabuli_Chr04              | 6616016                        | (C/T)       |
| 5536        | CakSNP5536     | <i>Kabuli</i>    | Ca_Kabuli_Chr04              | 6616071                        | (C/T)       |
| 5537        | CakSNP5537     | <i>Kabuli</i>    | Ca_Kabuli_Chr04              | 6688218                        | (G/A)       |
| 5538        | CakSNP5538     | <i>Kabuli</i>    | Ca_Kabuli_Chr04              | 6715326                        | (C/T)       |
| 5539        | CakSNP5539     | <i>Kabuli</i>    | Ca_Kabuli_Chr04              | 6723103                        | (G/T)       |
| 5540        | CakSNP5540     | <i>Kabuli</i>    | Ca_Kabuli_Chr04              | 6749334                        | (A/G)       |
| 5541        | CakSNP5541     | <i>Kabuli</i>    | Ca_Kabuli_Chr04              | 6749481                        | (C/T)       |
| 5542        | CakSNP5542     | <i>Kabuli</i>    | Ca_Kabuli_Chr04              | 6749550                        | (G/A)       |
| 5543        | CakSNP5543     | <i>Kabuli</i>    | Ca_Kabuli_Chr04              | 6749522                        | (T/C)       |
| 5544        | CakSNP5544     | <i>Kabuli</i>    | Ca_Kabuli_Chr04              | 6751549                        | (A/T)       |
| 5545        | CakSNP5545     | <i>Kabuli</i>    | Ca_Kabuli_Chr04              | 6761778                        | (C/A)       |
| 5546        | CakSNP5546     | <i>Kabuli</i>    | Ca_Kabuli_Chr04              | 6765922                        | (T/G)       |
| 5547        | CakSNP5547     | <i>Kabuli</i>    | Ca_Kabuli_Chr04              | 6765884                        | (T/C)       |

| <b>S.N.</b> | <b>SNP IDs</b> | <b>Cultivars</b> | <b>Chromosomes/scaffolds</b> | <b>Physical positions (bp)</b> | <b>SNPs</b> |
|-------------|----------------|------------------|------------------------------|--------------------------------|-------------|
| 5548        | CakSNP5548     | <i>Kabuli</i>    | Ca_Kabuli_Chr04              | 6792858                        | (T/G)       |
| 5549        | CakSNP5549     | <i>Kabuli</i>    | Ca_Kabuli_Chr04              | 6801632                        | (C/A)       |
| 5550        | CakSNP5550     | <i>Kabuli</i>    | Ca_Kabuli_Chr04              | 6841854                        | (G/A)       |
| 5551        | CakSNP5551     | <i>Kabuli</i>    | Ca_Kabuli_Chr04              | 6841856                        | (G/A)       |
| 5552        | CakSNP5552     | <i>Kabuli</i>    | Ca_Kabuli_Chr04              | 6841858                        | (G/A)       |
| 5553        | CakSNP5553     | <i>Kabuli</i>    | Ca_Kabuli_Chr04              | 6841859                        | (A/C)       |
| 5554        | CakSNP5554     | <i>Kabuli</i>    | Ca_Kabuli_Chr04              | 6841860                        | (G/A)       |
| 5555        | CakSNP5555     | <i>Kabuli</i>    | Ca_Kabuli_Chr04              | 6841861                        | (A/C)       |
| 5556        | CakSNP5556     | <i>Kabuli</i>    | Ca_Kabuli_Chr04              | 6843659                        | (T/C)       |
| 5557        | CakSNP5557     | <i>Kabuli</i>    | Ca_Kabuli_Chr04              | 6852908                        | (T/C)       |
| 5558        | CakSNP5558     | <i>Kabuli</i>    | Ca_Kabuli_Chr04              | 6889964                        | (T/G)       |
| 5559        | CakSNP5559     | <i>Kabuli</i>    | Ca_Kabuli_Chr04              | 6889974                        | (T/G)       |
| 5560        | CakSNP5560     | <i>Kabuli</i>    | Ca_Kabuli_Chr04              | 6890000                        | (A/G)       |
| 5561        | CakSNP5561     | <i>Kabuli</i>    | Ca_Kabuli_Chr04              | 6890005                        | (C/T)       |
| 5562        | CakSNP5562     | <i>Kabuli</i>    | Ca_Kabuli_Chr04              | 6890014                        | (G/T)       |
| 5563        | CakSNP5563     | <i>Kabuli</i>    | Ca_Kabuli_Chr04              | 6889994                        | (T/G)       |
| 5564        | CakSNP5564     | <i>Kabuli</i>    | Ca_Kabuli_Chr04              | 6895804                        | (G/A)       |
| 5565        | CakSNP5565     | <i>Kabuli</i>    | Ca_Kabuli_Chr04              | 6919896                        | (C/T)       |
| 5566        | CakSNP5566     | <i>Kabuli</i>    | Ca_Kabuli_Chr04              | 6920068                        | (G/A)       |
| 5567        | CakSNP5567     | <i>Kabuli</i>    | Ca_Kabuli_Chr04              | 6931668                        | (T/A)       |
| 5568        | CakSNP5568     | <i>Kabuli</i>    | Ca_Kabuli_Chr04              | 6960336                        | (G/A)       |
| 5569        | CakSNP5569     | <i>Kabuli</i>    | Ca_Kabuli_Chr04              | 6969771                        | (G/T)       |
| 5570        | CakSNP5570     | <i>Kabuli</i>    | Ca_Kabuli_Chr04              | 6969799                        | (T/C)       |
| 5571        | CakSNP5571     | <i>Kabuli</i>    | Ca_Kabuli_Chr04              | 6970808                        | (A/G)       |
| 5572        | CakSNP5572     | <i>Kabuli</i>    | Ca_Kabuli_Chr04              | 6970800                        | (A/G)       |
| 5573        | CakSNP5573     | <i>Kabuli</i>    | Ca_Kabuli_Chr04              | 6970792                        | (T/A)       |
| 5574        | CakSNP5574     | <i>Kabuli</i>    | Ca_Kabuli_Chr04              | 6970781                        | (G/A)       |
| 5575        | CakSNP5575     | <i>Kabuli</i>    | Ca_Kabuli_Chr04              | 6970856                        | (T/C)       |
| 5576        | CakSNP5576     | <i>Kabuli</i>    | Ca_Kabuli_Chr04              | 7013498                        | (A/G)       |
| 5577        | CakSNP5577     | <i>Kabuli</i>    | Ca_Kabuli_Chr04              | 7040229                        | (A/T)       |
| 5578        | CakSNP5578     | <i>Kabuli</i>    | Ca_Kabuli_Chr04              | 7142498                        | (G/A)       |
| 5579        | CakSNP5579     | <i>Kabuli</i>    | Ca_Kabuli_Chr04              | 7143207                        | (G/T)       |
| 5580        | CakSNP5580     | <i>Kabuli</i>    | Ca_Kabuli_Chr04              | 7143214                        | (T/C)       |
| 5581        | CakSNP5581     | <i>Kabuli</i>    | Ca_Kabuli_Chr04              | 7143238                        | (C/T)       |
| 5582        | CakSNP5582     | <i>Kabuli</i>    | Ca_Kabuli_Chr04              | 7155826                        | (G/A)       |
| 5583        | CakSNP5583     | <i>Kabuli</i>    | Ca_Kabuli_Chr04              | 7185974                        | (G/A)       |
| 5584        | CakSNP5584     | <i>Kabuli</i>    | Ca_Kabuli_Chr04              | 7231299                        | (C/T)       |
| 5585        | CakSNP5585     | <i>Kabuli</i>    | Ca_Kabuli_Chr04              | 7239917                        | (T/G)       |

| <b>S.N.</b> | <b>SNP IDs</b> | <b>Cultivars</b> | <b>Chromosomes/scaffolds</b> | <b>Physical positions (bp)</b> | <b>SNPs</b> |
|-------------|----------------|------------------|------------------------------|--------------------------------|-------------|
| 5586        | CakSNP5586     | <i>Kabuli</i>    | Ca_Kabuli_Chr04              | 7244301                        | (G/A)       |
| 5587        | CakSNP5587     | <i>Kabuli</i>    | Ca_Kabuli_Chr04              | 7335587                        | (C/T)       |
| 5588        | CakSNP5588     | <i>Kabuli</i>    | Ca_Kabuli_Chr04              | 7349958                        | (T/C)       |
| 5589        | CakSNP5589     | <i>Kabuli</i>    | Ca_Kabuli_Chr04              | 7349948                        | (T/C)       |
| 5590        | CakSNP5590     | <i>Kabuli</i>    | Ca_Kabuli_Chr04              | 7349900                        | (G/A)       |
| 5591        | CakSNP5591     | <i>Kabuli</i>    | Ca_Kabuli_Chr04              | 7349885                        | (G/A)       |
| 5592        | CakSNP5592     | <i>Kabuli</i>    | Ca_Kabuli_Chr04              | 7350192                        | (G/T)       |
| 5593        | CakSNP5593     | <i>Kabuli</i>    | Ca_Kabuli_Chr04              | 7371667                        | (G/A)       |
| 5594        | CakSNP5594     | <i>Kabuli</i>    | Ca_Kabuli_Chr04              | 7371708                        | (T/C)       |
| 5595        | CakSNP5595     | <i>Kabuli</i>    | Ca_Kabuli_Chr04              | 7416949                        | (C/T)       |
| 5596        | CakSNP5596     | <i>Kabuli</i>    | Ca_Kabuli_Chr04              | 7496298                        | (A/G)       |
| 5597        | CakSNP5597     | <i>Kabuli</i>    | Ca_Kabuli_Chr04              | 7520182                        | (A/T)       |
| 5598        | CakSNP5598     | <i>Kabuli</i>    | Ca_Kabuli_Chr04              | 7520184                        | (A/C)       |
| 5599        | CakSNP5599     | <i>Kabuli</i>    | Ca_Kabuli_Chr04              | 7522047                        | (C/T)       |
| 5600        | CakSNP5600     | <i>Kabuli</i>    | Ca_Kabuli_Chr04              | 7522033                        | (A/G)       |
| 5601        | CakSNP5601     | <i>Kabuli</i>    | Ca_Kabuli_Chr04              | 7587317                        | (A/G)       |
| 5602        | CakSNP5602     | <i>Kabuli</i>    | Ca_Kabuli_Chr04              | 7587516                        | (T/C)       |
| 5603        | CakSNP5603     | <i>Kabuli</i>    | Ca_Kabuli_Chr04              | 7598474                        | (G/C)       |
| 5604        | CakSNP5604     | <i>Kabuli</i>    | Ca_Kabuli_Chr04              | 7699429                        | (C/T)       |
| 5605        | CakSNP5605     | <i>Kabuli</i>    | Ca_Kabuli_Chr04              | 7717770                        | (A/G)       |
| 5606        | CakSNP5606     | <i>Kabuli</i>    | Ca_Kabuli_Chr04              | 7717935                        | (T/G)       |
| 5607        | CakSNP5607     | <i>Kabuli</i>    | Ca_Kabuli_Chr04              | 7717978                        | (G/A)       |
| 5608        | CakSNP5608     | <i>Kabuli</i>    | Ca_Kabuli_Chr04              | 7718270                        | (T/C)       |
| 5609        | CakSNP5609     | <i>Kabuli</i>    | Ca_Kabuli_Chr04              | 7718277                        | (G/A)       |
| 5610        | CakSNP5610     | <i>Kabuli</i>    | Ca_Kabuli_Chr04              | 7739202                        | (C/T)       |
| 5611        | CakSNP5611     | <i>Kabuli</i>    | Ca_Kabuli_Chr04              | 7746230                        | (A/C)       |
| 5612        | CakSNP5612     | <i>Kabuli</i>    | Ca_Kabuli_Chr04              | 7746242                        | (C/G)       |
| 5613        | CakSNP5613     | <i>Kabuli</i>    | Ca_Kabuli_Chr04              | 7812468                        | (C/T)       |
| 5614        | CakSNP5614     | <i>Kabuli</i>    | Ca_Kabuli_Chr04              | 7812491                        | (T/A)       |
| 5615        | CakSNP5615     | <i>Kabuli</i>    | Ca_Kabuli_Chr04              | 7812521                        | (A/G)       |
| 5616        | CakSNP5616     | <i>Kabuli</i>    | Ca_Kabuli_Chr04              | 7819865                        | (T/C)       |
| 5617        | CakSNP5617     | <i>Kabuli</i>    | Ca_Kabuli_Chr04              | 7821269                        | (G/A)       |
| 5618        | CakSNP5618     | <i>Kabuli</i>    | Ca_Kabuli_Chr04              | 7868480                        | (A/T)       |
| 5619        | CakSNP5619     | <i>Kabuli</i>    | Ca_Kabuli_Chr04              | 7883707                        | (T/A)       |
| 5620        | CakSNP5620     | <i>Kabuli</i>    | Ca_Kabuli_Chr04              | 7892596                        | (A/C)       |
| 5621        | CakSNP5621     | <i>Kabuli</i>    | Ca_Kabuli_Chr04              | 7975577                        | (C/G)       |
| 5622        | CakSNP5622     | <i>Kabuli</i>    | Ca_Kabuli_Chr04              | 7975586                        | (T/G)       |
| 5623        | CakSNP5623     | <i>Kabuli</i>    | Ca_Kabuli_Chr04              | 7988367                        | (A/G)       |

| <b>S.N.</b> | <b>SNP IDs</b> | <b>Cultivars</b> | <b>Chromosomes/scaffolds</b> | <b>Physical positions (bp)</b> | <b>SNPs</b> |
|-------------|----------------|------------------|------------------------------|--------------------------------|-------------|
| 5624        | CakSNP5624     | <i>Kabuli</i>    | Ca_Kabuli_Chr04              | 7988396                        | (C/T)       |
| 5625        | CakSNP5625     | <i>Kabuli</i>    | Ca_Kabuli_Chr04              | 7988399                        | (G/A)       |
| 5626        | CakSNP5626     | <i>Kabuli</i>    | Ca_Kabuli_Chr04              | 7988422                        | (T/G)       |
| 5627        | CakSNP5627     | <i>Kabuli</i>    | Ca_Kabuli_Chr04              | 7988444                        | (T/G)       |
| 5628        | CakSNP5628     | <i>Kabuli</i>    | Ca_Kabuli_Chr04              | 8025363                        | (T/C)       |
| 5629        | CakSNP5629     | <i>Kabuli</i>    | Ca_Kabuli_Chr04              | 8025348                        | (A/T)       |
| 5630        | CakSNP5630     | <i>Kabuli</i>    | Ca_Kabuli_Chr04              | 8025530                        | (A/G)       |
| 5631        | CakSNP5631     | <i>Kabuli</i>    | Ca_Kabuli_Chr04              | 8050770                        | (T/C)       |
| 5632        | CakSNP5632     | <i>Kabuli</i>    | Ca_Kabuli_Chr04              | 8051306                        | (T/C)       |
| 5633        | CakSNP5633     | <i>Kabuli</i>    | Ca_Kabuli_Chr04              | 8117401                        | (G/A)       |
| 5634        | CakSNP5634     | <i>Kabuli</i>    | Ca_Kabuli_Chr04              | 8178043                        | (G/A)       |
| 5635        | CakSNP5635     | <i>Kabuli</i>    | Ca_Kabuli_Chr04              | 8198702                        | (T/G)       |
| 5636        | CakSNP5636     | <i>Kabuli</i>    | Ca_Kabuli_Chr04              | 8203586                        | (C/T)       |
| 5637        | CakSNP5637     | <i>Kabuli</i>    | Ca_Kabuli_Chr04              | 8236449                        | (C/A)       |
| 5638        | CakSNP5638     | <i>Kabuli</i>    | Ca_Kabuli_Chr04              | 8237145                        | (C/T)       |
| 5639        | CakSNP5639     | <i>Kabuli</i>    | Ca_Kabuli_Chr04              | 8269099                        | (T/G)       |
| 5640        | CakSNP5640     | <i>Kabuli</i>    | Ca_Kabuli_Chr04              | 8269152                        | (C/T)       |
| 5641        | CakSNP5641     | <i>Kabuli</i>    | Ca_Kabuli_Chr04              | 8269347                        | (C/G)       |
| 5642        | CakSNP5642     | <i>Kabuli</i>    | Ca_Kabuli_Chr04              | 8302198                        | (A/G)       |
| 5643        | CakSNP5643     | <i>Kabuli</i>    | Ca_Kabuli_Chr04              | 8383890                        | (G/A)       |
| 5644        | CakSNP5644     | <i>Kabuli</i>    | Ca_Kabuli_Chr04              | 8396861                        | (T/A)       |
| 5645        | CakSNP5645     | <i>Kabuli</i>    | Ca_Kabuli_Chr04              | 8396837                        | (T/G)       |
| 5646        | CakSNP5646     | <i>Kabuli</i>    | Ca_Kabuli_Chr04              | 8401109                        | (A/G)       |
| 5647        | CakSNP5647     | <i>Kabuli</i>    | Ca_Kabuli_Chr04              | 8401126                        | (G/T)       |
| 5648        | CakSNP5648     | <i>Kabuli</i>    | Ca_Kabuli_Chr04              | 8401143                        | (A/T)       |
| 5649        | CakSNP5649     | <i>Kabuli</i>    | Ca_Kabuli_Chr04              | 8401248                        | (T/A)       |
| 5650        | CakSNP5650     | <i>Kabuli</i>    | Ca_Kabuli_Chr04              | 8401230                        | (A/G)       |
| 5651        | CakSNP5651     | <i>Kabuli</i>    | Ca_Kabuli_Chr04              | 8404108                        | (T/C)       |
| 5652        | CakSNP5652     | <i>Kabuli</i>    | Ca_Kabuli_Chr04              | 8404165                        | (C/A)       |
| 5653        | CakSNP5653     | <i>Kabuli</i>    | Ca_Kabuli_Chr04              | 8404244                        | (C/G)       |
| 5654        | CakSNP5654     | <i>Kabuli</i>    | Ca_Kabuli_Chr04              | 8471029                        | (G/A)       |
| 5655        | CakSNP5655     | <i>Kabuli</i>    | Ca_Kabuli_Chr04              | 8473120                        | (G/A)       |
| 5656        | CakSNP5656     | <i>Kabuli</i>    | Ca_Kabuli_Chr04              | 8473127                        | (G/A)       |
| 5657        | CakSNP5657     | <i>Kabuli</i>    | Ca_Kabuli_Chr04              | 8473294                        | (G/A)       |
| 5658        | CakSNP5658     | <i>Kabuli</i>    | Ca_Kabuli_Chr04              | 8473288                        | (A/G)       |
| 5659        | CakSNP5659     | <i>Kabuli</i>    | Ca_Kabuli_Chr04              | 8473246                        | (T/C)       |
| 5660        | CakSNP5660     | <i>Kabuli</i>    | Ca_Kabuli_Chr04              | 8474442                        | (C/T)       |
| 5661        | CakSNP5661     | <i>Kabuli</i>    | Ca_Kabuli_Chr04              | 8474441                        | (G/A)       |

| <b>S.N.</b> | <b>SNP IDs</b> | <b>Cultivars</b> | <b>Chromosomes/scaffolds</b> | <b>Physical positions (bp)</b> | <b>SNPs</b> |
|-------------|----------------|------------------|------------------------------|--------------------------------|-------------|
| 5662        | CakSNP5662     | <i>Kabuli</i>    | Ca_Kabuli_Chr04              | 8474401                        | (T/A)       |
| 5663        | CakSNP5663     | <i>Kabuli</i>    | Ca_Kabuli_Chr04              | 8475634                        | (A/C)       |
| 5664        | CakSNP5664     | <i>Kabuli</i>    | Ca_Kabuli_Chr04              | 8483482                        | (T/C)       |
| 5665        | CakSNP5665     | <i>Kabuli</i>    | Ca_Kabuli_Chr04              | 8483494                        | (T/C)       |
| 5666        | CakSNP5666     | <i>Kabuli</i>    | Ca_Kabuli_Chr04              | 8484976                        | (G/A)       |
| 5667        | CakSNP5667     | <i>Kabuli</i>    | Ca_Kabuli_Chr04              | 8484978                        | (A/G)       |
| 5668        | CakSNP5668     | <i>Kabuli</i>    | Ca_Kabuli_Chr04              | 8496641                        | (C/A)       |
| 5669        | CakSNP5669     | <i>Kabuli</i>    | Ca_Kabuli_Chr04              | 8510011                        | (A/C)       |
| 5670        | CakSNP5670     | <i>Kabuli</i>    | Ca_Kabuli_Chr04              | 8512095                        | (G/A)       |
| 5671        | CakSNP5671     | <i>Kabuli</i>    | Ca_Kabuli_Chr04              | 8512280                        | (C/T)       |
| 5672        | CakSNP5672     | <i>Kabuli</i>    | Ca_Kabuli_Chr04              | 8518979                        | (G/A)       |
| 5673        | CakSNP5673     | <i>Kabuli</i>    | Ca_Kabuli_Chr04              | 8534120                        | (C/T)       |
| 5674        | CakSNP5674     | <i>Kabuli</i>    | Ca_Kabuli_Chr04              | 8567380                        | (A/T)       |
| 5675        | CakSNP5675     | <i>Kabuli</i>    | Ca_Kabuli_Chr04              | 8567431                        | (C/T)       |
| 5676        | CakSNP5676     | <i>Kabuli</i>    | Ca_Kabuli_Chr04              | 8567490                        | (C/A)       |
| 5677        | CakSNP5677     | <i>Kabuli</i>    | Ca_Kabuli_Chr04              | 8567478                        | (A/C)       |
| 5678        | CakSNP5678     | <i>Kabuli</i>    | Ca_Kabuli_Chr04              | 8567477                        | (T/C)       |
| 5679        | CakSNP5679     | <i>Kabuli</i>    | Ca_Kabuli_Chr04              | 8567465                        | (C/T)       |
| 5680        | CakSNP5680     | <i>Kabuli</i>    | Ca_Kabuli_Chr04              | 8570458                        | (T/G)       |
| 5681        | CakSNP5681     | <i>Kabuli</i>    | Ca_Kabuli_Chr04              | 8570501                        | (G/C)       |
| 5682        | CakSNP5682     | <i>Kabuli</i>    | Ca_Kabuli_Chr04              | 8595427                        | (C/T)       |
| 5683        | CakSNP5683     | <i>Kabuli</i>    | Ca_Kabuli_Chr04              | 8601364                        | (T/G)       |
| 5684        | CakSNP5684     | <i>Kabuli</i>    | Ca_Kabuli_Chr04              | 8659774                        | (G/A)       |
| 5685        | CakSNP5685     | <i>Kabuli</i>    | Ca_Kabuli_Chr04              | 8659935                        | (T/A)       |
| 5686        | CakSNP5686     | <i>Kabuli</i>    | Ca_Kabuli_Chr04              | 8659946                        | (C/T)       |
| 5687        | CakSNP5687     | <i>Kabuli</i>    | Ca_Kabuli_Chr04              | 8659985                        | (T/C)       |
| 5688        | CakSNP5688     | <i>Kabuli</i>    | Ca_Kabuli_Chr04              | 8660115                        | (A/T)       |
| 5689        | CakSNP5689     | <i>Kabuli</i>    | Ca_Kabuli_Chr04              | 8660136                        | (G/A)       |
| 5690        | CakSNP5690     | <i>Kabuli</i>    | Ca_Kabuli_Chr04              | 8660608                        | (G/T)       |
| 5691        | CakSNP5691     | <i>Kabuli</i>    | Ca_Kabuli_Chr04              | 8660599                        | (A/G)       |
| 5692        | CakSNP5692     | <i>Kabuli</i>    | Ca_Kabuli_Chr04              | 8668648                        | (G/A)       |
| 5693        | CakSNP5693     | <i>Kabuli</i>    | Ca_Kabuli_Chr04              | 8668753                        | (A/G)       |
| 5694        | CakSNP5694     | <i>Kabuli</i>    | Ca_Kabuli_Chr04              | 8668945                        | (T/C)       |
| 5695        | CakSNP5695     | <i>Kabuli</i>    | Ca_Kabuli_Chr04              | 8669014                        | (C/G)       |
| 5696        | CakSNP5696     | <i>Kabuli</i>    | Ca_Kabuli_Chr04              | 8669104                        | (T/C)       |
| 5697        | CakSNP5697     | <i>Kabuli</i>    | Ca_Kabuli_Chr04              | 8669515                        | (C/T)       |
| 5698        | CakSNP5698     | <i>Kabuli</i>    | Ca_Kabuli_Chr04              | 8669513                        | (G/A)       |
| 5699        | CakSNP5699     | <i>Kabuli</i>    | Ca_Kabuli_Chr04              | 8669505                        | (G/T)       |



| <b>S.N.</b> | <b>SNP IDs</b> | <b>Cultivars</b> | <b>Chromosomes/scaffolds</b> | <b>Physical positions (bp)</b> | <b>SNPs</b> |
|-------------|----------------|------------------|------------------------------|--------------------------------|-------------|
| 5700        | CakSNP5700     | <i>Kabuli</i>    | Ca_Kabuli_Chr04              | 8681949                        | (G/A)       |
| 5701        | CakSNP5701     | <i>Kabuli</i>    | Ca_Kabuli_Chr04              | 8695562                        | (C/T)       |
| 5702        | CakSNP5702     | <i>Kabuli</i>    | Ca_Kabuli_Chr04              | 8751638                        | (A/C)       |
| 5703        | CakSNP5703     | <i>Kabuli</i>    | Ca_Kabuli_Chr04              | 8751629                        | (T/C)       |
| 5704        | CakSNP5704     | <i>Kabuli</i>    | Ca_Kabuli_Chr04              | 8751618                        | (A/C)       |
| 5705        | CakSNP5705     | <i>Kabuli</i>    | Ca_Kabuli_Chr04              | 8751591                        | (A/C)       |
| 5706        | CakSNP5706     | <i>Kabuli</i>    | Ca_Kabuli_Chr04              | 8772215                        | (A/C)       |
| 5707        | CakSNP5707     | <i>Kabuli</i>    | Ca_Kabuli_Chr04              | 8782879                        | (G/C)       |
| 5708        | CakSNP5708     | <i>Kabuli</i>    | Ca_Kabuli_Chr04              | 8791654                        | (A/G)       |
| 5709        | CakSNP5709     | <i>Kabuli</i>    | Ca_Kabuli_Chr04              | 8805504                        | (A/G)       |
| 5710        | CakSNP5710     | <i>Kabuli</i>    | Ca_Kabuli_Chr04              | 8805578                        | (A/C)       |
| 5711        | CakSNP5711     | <i>Kabuli</i>    | Ca_Kabuli_Chr04              | 8805667                        | (C/T)       |
| 5712        | CakSNP5712     | <i>Kabuli</i>    | Ca_Kabuli_Chr04              | 8805867                        | (A/C)       |
| 5713        | CakSNP5713     | <i>Kabuli</i>    | Ca_Kabuli_Chr04              | 8805839                        | (G/A)       |
| 5714        | CakSNP5714     | <i>Kabuli</i>    | Ca_Kabuli_Chr04              | 8809032                        | (C/T)       |
| 5715        | CakSNP5715     | <i>Kabuli</i>    | Ca_Kabuli_Chr04              | 8809064                        | (T/C)       |
| 5716        | CakSNP5716     | <i>Kabuli</i>    | Ca_Kabuli_Chr04              | 8809010                        | (A/G)       |
| 5717        | CakSNP5717     | <i>Kabuli</i>    | Ca_Kabuli_Chr04              | 8809456                        | (A/C)       |
| 5718        | CakSNP5718     | <i>Kabuli</i>    | Ca_Kabuli_Chr04              | 8844846                        | (A/G)       |
| 5719        | CakSNP5719     | <i>Kabuli</i>    | Ca_Kabuli_Chr04              | 8848654                        | (C/T)       |
| 5720        | CakSNP5720     | <i>Kabuli</i>    | Ca_Kabuli_Chr04              | 8848653                        | (T/C)       |
| 5721        | CakSNP5721     | <i>Kabuli</i>    | Ca_Kabuli_Chr04              | 8852334                        | (T/A)       |
| 5722        | CakSNP5722     | <i>Kabuli</i>    | Ca_Kabuli_Chr04              | 8852420                        | (T/C)       |
| 5723        | CakSNP5723     | <i>Kabuli</i>    | Ca_Kabuli_Chr04              | 8873494                        | (G/T)       |
| 5724        | CakSNP5724     | <i>Kabuli</i>    | Ca_Kabuli_Chr04              | 8873509                        | (G/C)       |
| 5725        | CakSNP5725     | <i>Kabuli</i>    | Ca_Kabuli_Chr04              | 8919264                        | (C/T)       |
| 5726        | CakSNP5726     | <i>Kabuli</i>    | Ca_Kabuli_Chr04              | 8919300                        | (C/T)       |
| 5727        | CakSNP5727     | <i>Kabuli</i>    | Ca_Kabuli_Chr04              | 8919395                        | (A/G)       |
| 5728        | CakSNP5728     | <i>Kabuli</i>    | Ca_Kabuli_Chr04              | 8952236                        | (A/G)       |
| 5729        | CakSNP5729     | <i>Kabuli</i>    | Ca_Kabuli_Chr04              | 8985949                        | (C/T)       |
| 5730        | CakSNP5730     | <i>Kabuli</i>    | Ca_Kabuli_Chr04              | 8985961                        | (C/T)       |
| 5731        | CakSNP5731     | <i>Kabuli</i>    | Ca_Kabuli_Chr04              | 8986031                        | (T/A)       |
| 5732        | CakSNP5732     | <i>Kabuli</i>    | Ca_Kabuli_Chr04              | 8986026                        | (T/A)       |
| 5733        | CakSNP5733     | <i>Kabuli</i>    | Ca_Kabuli_Chr04              | 8986024                        | (T/A)       |
| 5734        | CakSNP5734     | <i>Kabuli</i>    | Ca_Kabuli_Chr04              | 8986018                        | (G/A)       |
| 5735        | CakSNP5735     | <i>Kabuli</i>    | Ca_Kabuli_Chr04              | 8986008                        | (T/A)       |
| 5736        | CakSNP5736     | <i>Kabuli</i>    | Ca_Kabuli_Chr04              | 8986002                        | (T/A)       |
| 5737        | CakSNP5737     | <i>Kabuli</i>    | Ca_Kabuli_Chr04              | 8985998                        | (T/A)       |

| <b>S.N.</b> | <b>SNP IDs</b> | <b>Cultivars</b> | <b>Chromosomes/scaffolds</b> | <b>Physical positions (bp)</b> | <b>SNPs</b> |
|-------------|----------------|------------------|------------------------------|--------------------------------|-------------|
| 5738        | CakSNP5738     | <i>Kabuli</i>    | Ca_Kabuli_Chr04              | 8985994                        | (C/A)       |
| 5739        | CakSNP5739     | <i>Kabuli</i>    | Ca_Kabuli_Chr04              | 8986207                        | (G/C)       |
| 5740        | CakSNP5740     | <i>Kabuli</i>    | Ca_Kabuli_Chr04              | 8986217                        | (T/A)       |
| 5741        | CakSNP5741     | <i>Kabuli</i>    | Ca_Kabuli_Chr04              | 9075398                        | (G/A)       |
| 5742        | CakSNP5742     | <i>Kabuli</i>    | Ca_Kabuli_Chr04              | 9075395                        | (A/G)       |
| 5743        | CakSNP5743     | <i>Kabuli</i>    | Ca_Kabuli_Chr04              | 9075459                        | (C/T)       |
| 5744        | CakSNP5744     | <i>Kabuli</i>    | Ca_Kabuli_Chr04              | 9075520                        | (C/T)       |
| 5745        | CakSNP5745     | <i>Kabuli</i>    | Ca_Kabuli_Chr04              | 9075565                        | (A/G)       |
| 5746        | CakSNP5746     | <i>Kabuli</i>    | Ca_Kabuli_Chr04              | 9075543                        | (T/C)       |
| 5747        | CakSNP5747     | <i>Kabuli</i>    | Ca_Kabuli_Chr04              | 9075671                        | (A/G)       |
| 5748        | CakSNP5748     | <i>Kabuli</i>    | Ca_Kabuli_Chr04              | 9075677                        | (T/C)       |
| 5749        | CakSNP5749     | <i>Kabuli</i>    | Ca_Kabuli_Chr04              | 9075682                        | (G/A)       |
| 5750        | CakSNP5750     | <i>Kabuli</i>    | Ca_Kabuli_Chr04              | 9075737                        | (G/A)       |
| 5751        | CakSNP5751     | <i>Kabuli</i>    | Ca_Kabuli_Chr04              | 9075744                        | (T/G)       |
| 5752        | CakSNP5752     | <i>Kabuli</i>    | Ca_Kabuli_Chr04              | 9187887                        | (G/C)       |
| 5753        | CakSNP5753     | <i>Kabuli</i>    | Ca_Kabuli_Chr04              | 9187973                        | (T/G)       |
| 5754        | CakSNP5754     | <i>Kabuli</i>    | Ca_Kabuli_Chr04              | 9189976                        | (T/A)       |
| 5755        | CakSNP5755     | <i>Kabuli</i>    | Ca_Kabuli_Chr04              | 9211570                        | (A/G)       |
| 5756        | CakSNP5756     | <i>Kabuli</i>    | Ca_Kabuli_Chr04              | 9257131                        | (G/A)       |
| 5757        | CakSNP5757     | <i>Kabuli</i>    | Ca_Kabuli_Chr04              | 9331949                        | (C/T)       |
| 5758        | CakSNP5758     | <i>Kabuli</i>    | Ca_Kabuli_Chr04              | 9392373                        | (A/T)       |
| 5759        | CakSNP5759     | <i>Kabuli</i>    | Ca_Kabuli_Chr04              | 9392455                        | (A/G)       |
| 5760        | CakSNP5760     | <i>Kabuli</i>    | Ca_Kabuli_Chr04              | 9392427                        | (G/A)       |
| 5761        | CakSNP5761     | <i>Kabuli</i>    | Ca_Kabuli_Chr04              | 9427890                        | (T/G)       |
| 5762        | CakSNP5762     | <i>Kabuli</i>    | Ca_Kabuli_Chr04              | 9427892                        | (G/T)       |
| 5763        | CakSNP5763     | <i>Kabuli</i>    | Ca_Kabuli_Chr04              | 9427894                        | (A/C)       |
| 5764        | CakSNP5764     | <i>Kabuli</i>    | Ca_Kabuli_Chr04              | 9427964                        | (C/A)       |
| 5765        | CakSNP5765     | <i>Kabuli</i>    | Ca_Kabuli_Chr04              | 9451895                        | (T/A)       |
| 5766        | CakSNP5766     | <i>Kabuli</i>    | Ca_Kabuli_Chr04              | 9451850                        | (T/G)       |
| 5767        | CakSNP5767     | <i>Kabuli</i>    | Ca_Kabuli_Chr04              | 9491741                        | (A/T)       |
| 5768        | CakSNP5768     | <i>Kabuli</i>    | Ca_Kabuli_Chr04              | 9533658                        | (A/G)       |
| 5769        | CakSNP5769     | <i>Kabuli</i>    | Ca_Kabuli_Chr04              | 9533688                        | (T/G)       |
| 5770        | CakSNP5770     | <i>Kabuli</i>    | Ca_Kabuli_Chr04              | 9579383                        | (C/A)       |
| 5771        | CakSNP5771     | <i>Kabuli</i>    | Ca_Kabuli_Chr04              | 9579393                        | (G/A)       |
| 5772        | CakSNP5772     | <i>Kabuli</i>    | Ca_Kabuli_Chr04              | 9579401                        | (G/T)       |
| 5773        | CakSNP5773     | <i>Kabuli</i>    | Ca_Kabuli_Chr04              | 9579519                        | (A/T)       |
| 5774        | CakSNP5774     | <i>Kabuli</i>    | Ca_Kabuli_Chr04              | 9579517                        | (T/C)       |
| 5775        | CakSNP5775     | <i>Kabuli</i>    | Ca_Kabuli_Chr04              | 9580341                        | (T/A)       |

| <b>S.N.</b> | <b>SNP IDs</b> | <b>Cultivars</b> | <b>Chromosomes/scaffolds</b> | <b>Physical positions (bp)</b> | <b>SNPs</b> |
|-------------|----------------|------------------|------------------------------|--------------------------------|-------------|
| 5776        | CakSNP5776     | <i>Kabuli</i>    | Ca_Kabuli_Chr04              | 9580339                        | (T/G)       |
| 5777        | CakSNP5777     | <i>Kabuli</i>    | Ca_Kabuli_Chr04              | 9614897                        | (G/A)       |
| 5778        | CakSNP5778     | <i>Kabuli</i>    | Ca_Kabuli_Chr04              | 9614905                        | (C/A)       |
| 5779        | CakSNP5779     | <i>Kabuli</i>    | Ca_Kabuli_Chr04              | 9661685                        | (G/A)       |
| 5780        | CakSNP5780     | <i>Kabuli</i>    | Ca_Kabuli_Chr04              | 9670905                        | (C/T)       |
| 5781        | CakSNP5781     | <i>Kabuli</i>    | Ca_Kabuli_Chr04              | 9670996                        | (G/T)       |
| 5782        | CakSNP5782     | <i>Kabuli</i>    | Ca_Kabuli_Chr04              | 9671007                        | (G/T)       |
| 5783        | CakSNP5783     | <i>Kabuli</i>    | Ca_Kabuli_Chr04              | 9671089                        | (T/G)       |
| 5784        | CakSNP5784     | <i>Kabuli</i>    | Ca_Kabuli_Chr04              | 9706453                        | (T/G)       |
| 5785        | CakSNP5785     | <i>Kabuli</i>    | Ca_Kabuli_Chr04              | 9706480                        | (T/A)       |
| 5786        | CakSNP5786     | <i>Kabuli</i>    | Ca_Kabuli_Chr04              | 9706481                        | (A/C)       |
| 5787        | CakSNP5787     | <i>Kabuli</i>    | Ca_Kabuli_Chr04              | 9740099                        | (A/G)       |
| 5788        | CakSNP5788     | <i>Kabuli</i>    | Ca_Kabuli_Chr04              | 9800865                        | (C/T)       |
| 5789        | CakSNP5789     | <i>Kabuli</i>    | Ca_Kabuli_Chr04              | 9802603                        | (T/C)       |
| 5790        | CakSNP5790     | <i>Kabuli</i>    | Ca_Kabuli_Chr04              | 9836559                        | (G/T)       |
| 5791        | CakSNP5791     | <i>Kabuli</i>    | Ca_Kabuli_Chr04              | 9840763                        | (C/A)       |
| 5792        | CakSNP5792     | <i>Kabuli</i>    | Ca_Kabuli_Chr04              | 9840906                        | (A/C)       |
| 5793        | CakSNP5793     | <i>Kabuli</i>    | Ca_Kabuli_Chr04              | 9846321                        | (T/A)       |
| 5794        | CakSNP5794     | <i>Kabuli</i>    | Ca_Kabuli_Chr04              | 9947077                        | (A/G)       |
| 5795        | CakSNP5795     | <i>Kabuli</i>    | Ca_Kabuli_Chr04              | 9973728                        | (C/G)       |
| 5796        | CakSNP5796     | <i>Kabuli</i>    | Ca_Kabuli_Chr04              | 9976039                        | (C/T)       |
| 5797        | CakSNP5797     | <i>Kabuli</i>    | Ca_Kabuli_Chr04              | 9999907                        | (A/T)       |
| 5798        | CakSNP5798     | <i>Kabuli</i>    | Ca_Kabuli_Chr04              | 10007069                       | (A/G)       |
| 5799        | CakSNP5799     | <i>Kabuli</i>    | Ca_Kabuli_Chr04              | 10007151                       | (C/T)       |
| 5800        | CakSNP5800     | <i>Kabuli</i>    | Ca_Kabuli_Chr04              | 10007193                       | (T/A)       |
| 5801        | CakSNP5801     | <i>Kabuli</i>    | Ca_Kabuli_Chr04              | 10007332                       | (T/C)       |
| 5802        | CakSNP5802     | <i>Kabuli</i>    | Ca_Kabuli_Chr04              | 10007286                       | (C/T)       |
| 5803        | CakSNP5803     | <i>Kabuli</i>    | Ca_Kabuli_Chr04              | 10007372                       | (C/A)       |
| 5804        | CakSNP5804     | <i>Kabuli</i>    | Ca_Kabuli_Chr04              | 10009839                       | (G/A)       |
| 5805        | CakSNP5805     | <i>Kabuli</i>    | Ca_Kabuli_Chr04              | 10013120                       | (G/A)       |
| 5806        | CakSNP5806     | <i>Kabuli</i>    | Ca_Kabuli_Chr04              | 10013148                       | (G/T)       |
| 5807        | CakSNP5807     | <i>Kabuli</i>    | Ca_Kabuli_Chr04              | 10017467                       | (A/C)       |
| 5808        | CakSNP5808     | <i>Kabuli</i>    | Ca_Kabuli_Chr04              | 10024226                       | (G/A)       |
| 5809        | CakSNP5809     | <i>Kabuli</i>    | Ca_Kabuli_Chr04              | 10030134                       | (A/G)       |
| 5810        | CakSNP5810     | <i>Kabuli</i>    | Ca_Kabuli_Chr04              | 10116516                       | (T/G)       |
| 5811        | CakSNP5811     | <i>Kabuli</i>    | Ca_Kabuli_Chr04              | 10151711                       | (A/C)       |
| 5812        | CakSNP5812     | <i>Kabuli</i>    | Ca_Kabuli_Chr04              | 10151943                       | (C/T)       |
| 5813        | CakSNP5813     | <i>Kabuli</i>    | Ca_Kabuli_Chr04              | 10184428                       | (G/T)       |

| <b>S.N.</b> | <b>SNP IDs</b> | <b>Cultivars</b> | <b>Chromosomes/scaffolds</b> | <b>Physical positions (bp)</b> | <b>SNPs</b> |
|-------------|----------------|------------------|------------------------------|--------------------------------|-------------|
| 5814        | CakSNP5814     | <i>Kabuli</i>    | Ca_Kabuli_Chr04              | 10184427                       | (C/A)       |
| 5815        | CakSNP5815     | <i>Kabuli</i>    | Ca_Kabuli_Chr04              | 10185602                       | (T/G)       |
| 5816        | CakSNP5816     | <i>Kabuli</i>    | Ca_Kabuli_Chr04              | 10185625                       | (A/G)       |
| 5817        | CakSNP5817     | <i>Kabuli</i>    | Ca_Kabuli_Chr04              | 10205246                       | (C/T)       |
| 5818        | CakSNP5818     | <i>Kabuli</i>    | Ca_Kabuli_Chr04              | 10290706                       | (G/T)       |
| 5819        | CakSNP5819     | <i>Kabuli</i>    | Ca_Kabuli_Chr04              | 10293203                       | (T/C)       |
| 5820        | CakSNP5820     | <i>Kabuli</i>    | Ca_Kabuli_Chr04              | 10293241                       | (C/G)       |
| 5821        | CakSNP5821     | <i>Kabuli</i>    | Ca_Kabuli_Chr04              | 10294380                       | (A/G)       |
| 5822        | CakSNP5822     | <i>Kabuli</i>    | Ca_Kabuli_Chr04              | 10305276                       | (G/A)       |
| 5823        | CakSNP5823     | <i>Kabuli</i>    | Ca_Kabuli_Chr04              | 10305235                       | (A/G)       |
| 5824        | CakSNP5824     | <i>Kabuli</i>    | Ca_Kabuli_Chr04              | 10305285                       | (C/A)       |
| 5825        | CakSNP5825     | <i>Kabuli</i>    | Ca_Kabuli_Chr04              | 10411809                       | (G/A)       |
| 5826        | CakSNP5826     | <i>Kabuli</i>    | Ca_Kabuli_Chr04              | 10422142                       | (A/T)       |
| 5827        | CakSNP5827     | <i>Kabuli</i>    | Ca_Kabuli_Chr04              | 10422469                       | (C/A)       |
| 5828        | CakSNP5828     | <i>Kabuli</i>    | Ca_Kabuli_Chr04              | 10430622                       | (A/C)       |
| 5829        | CakSNP5829     | <i>Kabuli</i>    | Ca_Kabuli_Chr04              | 10430617                       | (A/C)       |
| 5830        | CakSNP5830     | <i>Kabuli</i>    | Ca_Kabuli_Chr04              | 10430613                       | (C/A)       |
| 5831        | CakSNP5831     | <i>Kabuli</i>    | Ca_Kabuli_Chr04              | 10430603                       | (G/A)       |
| 5832        | CakSNP5832     | <i>Kabuli</i>    | Ca_Kabuli_Chr04              | 10430595                       | (A/C)       |
| 5833        | CakSNP5833     | <i>Kabuli</i>    | Ca_Kabuli_Chr04              | 10430588                       | (T/C)       |
| 5834        | CakSNP5834     | <i>Kabuli</i>    | Ca_Kabuli_Chr04              | 10430574                       | (A/T)       |
| 5835        | CakSNP5835     | <i>Kabuli</i>    | Ca_Kabuli_Chr04              | 10464927                       | (T/G)       |
| 5836        | CakSNP5836     | <i>Kabuli</i>    | Ca_Kabuli_Chr04              | 10465328                       | (T/C)       |
| 5837        | CakSNP5837     | <i>Kabuli</i>    | Ca_Kabuli_Chr04              | 10547575                       | (G/A)       |
| 5838        | CakSNP5838     | <i>Kabuli</i>    | Ca_Kabuli_Chr04              | 10547561                       | (T/C)       |
| 5839        | CakSNP5839     | <i>Kabuli</i>    | Ca_Kabuli_Chr04              | 10642002                       | (A/G)       |
| 5840        | CakSNP5840     | <i>Kabuli</i>    | Ca_Kabuli_Chr04              | 10642043                       | (T/G)       |
| 5841        | CakSNP5841     | <i>Kabuli</i>    | Ca_Kabuli_Chr04              | 10642044                       | (A/T)       |
| 5842        | CakSNP5842     | <i>Kabuli</i>    | Ca_Kabuli_Chr04              | 10643339                       | (T/A)       |
| 5843        | CakSNP5843     | <i>Kabuli</i>    | Ca_Kabuli_Chr04              | 10643331                       | (T/A)       |
| 5844        | CakSNP5844     | <i>Kabuli</i>    | Ca_Kabuli_Chr04              | 10644245                       | (G/A)       |
| 5845        | CakSNP5845     | <i>Kabuli</i>    | Ca_Kabuli_Chr04              | 10670664                       | (C/A)       |
| 5846        | CakSNP5846     | <i>Kabuli</i>    | Ca_Kabuli_Chr04              | 10699624                       | (A/T)       |
| 5847        | CakSNP5847     | <i>Kabuli</i>    | Ca_Kabuli_Chr04              | 10780990                       | (A/G)       |
| 5848        | CakSNP5848     | <i>Kabuli</i>    | Ca_Kabuli_Chr04              | 10807993                       | (T/C)       |
| 5849        | CakSNP5849     | <i>Kabuli</i>    | Ca_Kabuli_Chr04              | 10827485                       | (G/A)       |
| 5850        | CakSNP5850     | <i>Kabuli</i>    | Ca_Kabuli_Chr04              | 10827515                       | (C/G)       |
| 5851        | CakSNP5851     | <i>Kabuli</i>    | Ca_Kabuli_Chr04              | 10901282                       | (T/C)       |

| <b>S.N.</b> | <b>SNP IDs</b> | <b>Cultivars</b> | <b>Chromosomes/scaffolds</b> | <b>Physical positions (bp)</b> | <b>SNPs</b> |
|-------------|----------------|------------------|------------------------------|--------------------------------|-------------|
| 5852        | CakSNP5852     | <i>Kabuli</i>    | Ca_Kabuli_Chr04              | 10917723                       | (T/C)       |
| 5853        | CakSNP5853     | <i>Kabuli</i>    | Ca_Kabuli_Chr04              | 10917717                       | (C/G)       |
| 5854        | CakSNP5854     | <i>Kabuli</i>    | Ca_Kabuli_Chr04              | 10925490                       | (G/A)       |
| 5855        | CakSNP5855     | <i>Kabuli</i>    | Ca_Kabuli_Chr04              | 10928923                       | (T/C)       |
| 5856        | CakSNP5856     | <i>Kabuli</i>    | Ca_Kabuli_Chr04              | 10950823                       | (C/T)       |
| 5857        | CakSNP5857     | <i>Kabuli</i>    | Ca_Kabuli_Chr04              | 10971039                       | (C/A)       |
| 5858        | CakSNP5858     | <i>Kabuli</i>    | Ca_Kabuli_Chr04              | 10990000                       | (T/C)       |
| 5859        | CakSNP5859     | <i>Kabuli</i>    | Ca_Kabuli_Chr04              | 10990008                       | (A/T)       |
| 5860        | CakSNP5860     | <i>Kabuli</i>    | Ca_Kabuli_Chr04              | 10990049                       | (G/T)       |
| 5861        | CakSNP5861     | <i>Kabuli</i>    | Ca_Kabuli_Chr04              | 10990058                       | (T/C)       |
| 5862        | CakSNP5862     | <i>Kabuli</i>    | Ca_Kabuli_Chr04              | 10990265                       | (T/A)       |
| 5863        | CakSNP5863     | <i>Kabuli</i>    | Ca_Kabuli_Chr04              | 10990261                       | (A/G)       |
| 5864        | CakSNP5864     | <i>Kabuli</i>    | Ca_Kabuli_Chr04              | 10991842                       | (G/A)       |
| 5865        | CakSNP5865     | <i>Kabuli</i>    | Ca_Kabuli_Chr04              | 10991910                       | (C/T)       |
| 5866        | CakSNP5866     | <i>Kabuli</i>    | Ca_Kabuli_Chr04              | 11040108                       | (C/T)       |
| 5867        | CakSNP5867     | <i>Kabuli</i>    | Ca_Kabuli_Chr04              | 11051335                       | (C/T)       |
| 5868        | CakSNP5868     | <i>Kabuli</i>    | Ca_Kabuli_Chr04              | 11059403                       | (T/G)       |
| 5869        | CakSNP5869     | <i>Kabuli</i>    | Ca_Kabuli_Chr04              | 11059404                       | (T/G)       |
| 5870        | CakSNP5870     | <i>Kabuli</i>    | Ca_Kabuli_Chr04              | 11059414                       | (T/G)       |
| 5871        | CakSNP5871     | <i>Kabuli</i>    | Ca_Kabuli_Chr04              | 11059572                       | (G/A)       |
| 5872        | CakSNP5872     | <i>Kabuli</i>    | Ca_Kabuli_Chr04              | 11059540                       | (T/C)       |
| 5873        | CakSNP5873     | <i>Kabuli</i>    | Ca_Kabuli_Chr04              | 11096124                       | (A/G)       |
| 5874        | CakSNP5874     | <i>Kabuli</i>    | Ca_Kabuli_Chr04              | 11096225                       | (A/G)       |
| 5875        | CakSNP5875     | <i>Kabuli</i>    | Ca_Kabuli_Chr04              | 11096290                       | (G/A)       |
| 5876        | CakSNP5876     | <i>Kabuli</i>    | Ca_Kabuli_Chr04              | 11113277                       | (A/C)       |
| 5877        | CakSNP5877     | <i>Kabuli</i>    | Ca_Kabuli_Chr04              | 11114238                       | (T/C)       |
| 5878        | CakSNP5878     | <i>Kabuli</i>    | Ca_Kabuli_Chr04              | 11142202                       | (A/G)       |
| 5879        | CakSNP5879     | <i>Kabuli</i>    | Ca_Kabuli_Chr04              | 11142227                       | (C/T)       |
| 5880        | CakSNP5880     | <i>Kabuli</i>    | Ca_Kabuli_Chr04              | 11196803                       | (T/G)       |
| 5881        | CakSNP5881     | <i>Kabuli</i>    | Ca_Kabuli_Chr04              | 11230403                       | (G/T)       |
| 5882        | CakSNP5882     | <i>Kabuli</i>    | Ca_Kabuli_Chr04              | 11230400                       | (T/A)       |
| 5883        | CakSNP5883     | <i>Kabuli</i>    | Ca_Kabuli_Chr04              | 11230397                       | (G/C)       |
| 5884        | CakSNP5884     | <i>Kabuli</i>    | Ca_Kabuli_Chr04              | 11231142                       | (A/G)       |
| 5885        | CakSNP5885     | <i>Kabuli</i>    | Ca_Kabuli_Chr04              | 11231137                       | (A/G)       |
| 5886        | CakSNP5886     | <i>Kabuli</i>    | Ca_Kabuli_Chr04              | 11231135                       | (C/T)       |
| 5887        | CakSNP5887     | <i>Kabuli</i>    | Ca_Kabuli_Chr04              | 11244334                       | (T/G)       |
| 5888        | CakSNP5888     | <i>Kabuli</i>    | Ca_Kabuli_Chr04              | 11244395                       | (G/T)       |
| 5889        | CakSNP5889     | <i>Kabuli</i>    | Ca_Kabuli_Chr04              | 11246093                       | (G/A)       |

| <b>S.N.</b> | <b>SNP IDs</b> | <b>Cultivars</b> | <b>Chromosomes/scaffolds</b> | <b>Physical positions (bp)</b> | <b>SNPs</b> |
|-------------|----------------|------------------|------------------------------|--------------------------------|-------------|
| 5890        | CakSNP5890     | <i>Kabuli</i>    | Ca_Kabuli_Chr04              | 11246173                       | (C/T)       |
| 5891        | CakSNP5891     | <i>Kabuli</i>    | Ca_Kabuli_Chr04              | 11246164                       | (G/A)       |
| 5892        | CakSNP5892     | <i>Kabuli</i>    | Ca_Kabuli_Chr04              | 11273328                       | (T/C)       |
| 5893        | CakSNP5893     | <i>Kabuli</i>    | Ca_Kabuli_Chr04              | 11273405                       | (A/T)       |
| 5894        | CakSNP5894     | <i>Kabuli</i>    | Ca_Kabuli_Chr04              | 11274281                       | (T/C)       |
| 5895        | CakSNP5895     | <i>Kabuli</i>    | Ca_Kabuli_Chr04              | 11275171                       | (T/C)       |
| 5896        | CakSNP5896     | <i>Kabuli</i>    | Ca_Kabuli_Chr04              | 11276413                       | (C/G)       |
| 5897        | CakSNP5897     | <i>Kabuli</i>    | Ca_Kabuli_Chr04              | 11276484                       | (T/C)       |
| 5898        | CakSNP5898     | <i>Kabuli</i>    | Ca_Kabuli_Chr04              | 11277138                       | (A/G)       |
| 5899        | CakSNP5899     | <i>Kabuli</i>    | Ca_Kabuli_Chr04              | 11277297                       | (G/A)       |
| 5900        | CakSNP5900     | <i>Kabuli</i>    | Ca_Kabuli_Chr04              | 11277574                       | (G/C)       |
| 5901        | CakSNP5901     | <i>Kabuli</i>    | Ca_Kabuli_Chr04              | 11334350                       | (A/G)       |
| 5902        | CakSNP5902     | <i>Kabuli</i>    | Ca_Kabuli_Chr04              | 11334343                       | (A/T)       |
| 5903        | CakSNP5903     | <i>Kabuli</i>    | Ca_Kabuli_Chr04              | 11343257                       | (T/C)       |
| 5904        | CakSNP5904     | <i>Kabuli</i>    | Ca_Kabuli_Chr04              | 11343230                       | (G/C)       |
| 5905        | CakSNP5905     | <i>Kabuli</i>    | Ca_Kabuli_Chr04              | 11379077                       | (T/C)       |
| 5906        | CakSNP5906     | <i>Kabuli</i>    | Ca_Kabuli_Chr04              | 11398699                       | (A/G)       |
| 5907        | CakSNP5907     | <i>Kabuli</i>    | Ca_Kabuli_Chr04              | 11398682                       | (G/A)       |
| 5908        | CakSNP5908     | <i>Kabuli</i>    | Ca_Kabuli_Chr04              | 11398889                       | (A/G)       |
| 5909        | CakSNP5909     | <i>Kabuli</i>    | Ca_Kabuli_Chr04              | 11414506                       | (C/T)       |
| 5910        | CakSNP5910     | <i>Kabuli</i>    | Ca_Kabuli_Chr04              | 11435651                       | (A/G)       |
| 5911        | CakSNP5911     | <i>Kabuli</i>    | Ca_Kabuli_Chr04              | 11441604                       | (T/A)       |
| 5912        | CakSNP5912     | <i>Kabuli</i>    | Ca_Kabuli_Chr04              | 11441615                       | (T/C)       |
| 5913        | CakSNP5913     | <i>Kabuli</i>    | Ca_Kabuli_Chr04              | 11441619                       | (G/A)       |
| 5914        | CakSNP5914     | <i>Kabuli</i>    | Ca_Kabuli_Chr04              | 11441655                       | (T/A)       |
| 5915        | CakSNP5915     | <i>Kabuli</i>    | Ca_Kabuli_Chr04              | 11441707                       | (A/C)       |
| 5916        | CakSNP5916     | <i>Kabuli</i>    | Ca_Kabuli_Chr04              | 11465057                       | (C/G)       |
| 5917        | CakSNP5917     | <i>Kabuli</i>    | Ca_Kabuli_Chr04              | 11465075                       | (T/C)       |
| 5918        | CakSNP5918     | <i>Kabuli</i>    | Ca_Kabuli_Chr04              | 11465113                       | (C/T)       |
| 5919        | CakSNP5919     | <i>Kabuli</i>    | Ca_Kabuli_Chr04              | 11490100                       | (C/T)       |
| 5920        | CakSNP5920     | <i>Kabuli</i>    | Ca_Kabuli_Chr04              | 11490154                       | (A/T)       |
| 5921        | CakSNP5921     | <i>Kabuli</i>    | Ca_Kabuli_Chr04              | 11490125                       | (G/T)       |
| 5922        | CakSNP5922     | <i>Kabuli</i>    | Ca_Kabuli_Chr04              | 11490496                       | (G/A)       |
| 5923        | CakSNP5923     | <i>Kabuli</i>    | Ca_Kabuli_Chr04              | 11517582                       | (C/T)       |
| 5924        | CakSNP5924     | <i>Kabuli</i>    | Ca_Kabuli_Chr04              | 11517517                       | (C/A)       |
| 5925        | CakSNP5925     | <i>Kabuli</i>    | Ca_Kabuli_Chr04              | 11572051                       | (C/T)       |
| 5926        | CakSNP5926     | <i>Kabuli</i>    | Ca_Kabuli_Chr04              | 11645738                       | (A/G)       |
| 5927        | CakSNP5927     | <i>Kabuli</i>    | Ca_Kabuli_Chr04              | 11646347                       | (C/G)       |

| <b>S.N.</b> | <b>SNP IDs</b> | <b>Cultivars</b> | <b>Chromosomes/scaffolds</b> | <b>Physical positions (bp)</b> | <b>SNPs</b> |
|-------------|----------------|------------------|------------------------------|--------------------------------|-------------|
| 5928        | CakSNP5928     | <i>Kabuli</i>    | Ca_Kabuli_Chr04              | 11646453                       | (G/A)       |
| 5929        | CakSNP5929     | <i>Kabuli</i>    | Ca_Kabuli_Chr04              | 11658323                       | (A/G)       |
| 5930        | CakSNP5930     | <i>Kabuli</i>    | Ca_Kabuli_Chr04              | 11658314                       | (A/G)       |
| 5931        | CakSNP5931     | <i>Kabuli</i>    | Ca_Kabuli_Chr04              | 11689611                       | (C/T)       |
| 5932        | CakSNP5932     | <i>Kabuli</i>    | Ca_Kabuli_Chr04              | 11689647                       | (T/C)       |
| 5933        | CakSNP5933     | <i>Kabuli</i>    | Ca_Kabuli_Chr04              | 11752862                       | (A/G)       |
| 5934        | CakSNP5934     | <i>Kabuli</i>    | Ca_Kabuli_Chr04              | 11752855                       | (A/G)       |
| 5935        | CakSNP5935     | <i>Kabuli</i>    | Ca_Kabuli_Chr04              | 11772023                       | (G/T)       |
| 5936        | CakSNP5936     | <i>Kabuli</i>    | Ca_Kabuli_Chr04              | 11838005                       | (C/T)       |
| 5937        | CakSNP5937     | <i>Kabuli</i>    | Ca_Kabuli_Chr04              | 11852291                       | (A/G)       |
| 5938        | CakSNP5938     | <i>Kabuli</i>    | Ca_Kabuli_Chr04              | 11926352                       | (G/C)       |
| 5939        | CakSNP5939     | <i>Kabuli</i>    | Ca_Kabuli_Chr04              | 11985628                       | (G/A)       |
| 5940        | CakSNP5940     | <i>Kabuli</i>    | Ca_Kabuli_Chr04              | 11985604                       | (C/T)       |
| 5941        | CakSNP5941     | <i>Kabuli</i>    | Ca_Kabuli_Chr04              | 12004082                       | (A/T)       |
| 5942        | CakSNP5942     | <i>Kabuli</i>    | Ca_Kabuli_Chr04              | 12004209                       | (C/T)       |
| 5943        | CakSNP5943     | <i>Kabuli</i>    | Ca_Kabuli_Chr04              | 12004205                       | (A/C)       |
| 5944        | CakSNP5944     | <i>Kabuli</i>    | Ca_Kabuli_Chr04              | 12023137                       | (A/T)       |
| 5945        | CakSNP5945     | <i>Kabuli</i>    | Ca_Kabuli_Chr04              | 12023215                       | (G/A)       |
| 5946        | CakSNP5946     | <i>Kabuli</i>    | Ca_Kabuli_Chr04              | 12045899                       | (T/A)       |
| 5947        | CakSNP5947     | <i>Kabuli</i>    | Ca_Kabuli_Chr04              | 12045903                       | (C/A)       |
| 5948        | CakSNP5948     | <i>Kabuli</i>    | Ca_Kabuli_Chr04              | 12045906                       | (C/A)       |
| 5949        | CakSNP5949     | <i>Kabuli</i>    | Ca_Kabuli_Chr04              | 12045910                       | (G/A)       |
| 5950        | CakSNP5950     | <i>Kabuli</i>    | Ca_Kabuli_Chr04              | 12070990                       | (T/A)       |
| 5951        | CakSNP5951     | <i>Kabuli</i>    | Ca_Kabuli_Chr04              | 12070994                       | (C/A)       |
| 5952        | CakSNP5952     | <i>Kabuli</i>    | Ca_Kabuli_Chr04              | 12070997                       | (C/A)       |
| 5953        | CakSNP5953     | <i>Kabuli</i>    | Ca_Kabuli_Chr04              | 12071001                       | (G/A)       |
| 5954        | CakSNP5954     | <i>Kabuli</i>    | Ca_Kabuli_Chr04              | 12167328                       | (A/G)       |
| 5955        | CakSNP5955     | <i>Kabuli</i>    | Ca_Kabuli_Chr04              | 12167568                       | (G/A)       |
| 5956        | CakSNP5956     | <i>Kabuli</i>    | Ca_Kabuli_Chr04              | 12212917                       | (G/A)       |
| 5957        | CakSNP5957     | <i>Kabuli</i>    | Ca_Kabuli_Chr04              | 12213071                       | (C/A)       |
| 5958        | CakSNP5958     | <i>Kabuli</i>    | Ca_Kabuli_Chr04              | 12213046                       | (T/C)       |
| 5959        | CakSNP5959     | <i>Kabuli</i>    | Ca_Kabuli_Chr04              | 12234358                       | (C/A)       |
| 5960        | CakSNP5960     | <i>Kabuli</i>    | Ca_Kabuli_Chr04              | 12249494                       | (T/C)       |
| 5961        | CakSNP5961     | <i>Kabuli</i>    | Ca_Kabuli_Chr04              | 12251184                       | (G/A)       |
| 5962        | CakSNP5962     | <i>Kabuli</i>    | Ca_Kabuli_Chr04              | 12274290                       | (A/T)       |
| 5963        | CakSNP5963     | <i>Kabuli</i>    | Ca_Kabuli_Chr04              | 12316847                       | (T/C)       |
| 5964        | CakSNP5964     | <i>Kabuli</i>    | Ca_Kabuli_Chr04              | 12431895                       | (C/T)       |
| 5965        | CakSNP5965     | <i>Kabuli</i>    | Ca_Kabuli_Chr04              | 12431915                       | (A/G)       |

| <b>S.N.</b> | <b>SNP IDs</b> | <b>Cultivars</b> | <b>Chromosomes/scaffolds</b> | <b>Physical positions (bp)</b> | <b>SNPs</b> |
|-------------|----------------|------------------|------------------------------|--------------------------------|-------------|
| 5966        | CakSNP5966     | <i>Kabuli</i>    | Ca_Kabuli_Chr04              | 12484911                       | (A/T)       |
| 5967        | CakSNP5967     | <i>Kabuli</i>    | Ca_Kabuli_Chr04              | 12506440                       | (A/G)       |
| 5968        | CakSNP5968     | <i>Kabuli</i>    | Ca_Kabuli_Chr04              | 12506450                       | (T/A)       |
| 5969        | CakSNP5969     | <i>Kabuli</i>    | Ca_Kabuli_Chr04              | 12514728                       | (G/A)       |
| 5970        | CakSNP5970     | <i>Kabuli</i>    | Ca_Kabuli_Chr04              | 12514726                       | (C/T)       |
| 5971        | CakSNP5971     | <i>Kabuli</i>    | Ca_Kabuli_Chr04              | 12514724                       | (T/C)       |
| 5972        | CakSNP5972     | <i>Kabuli</i>    | Ca_Kabuli_Chr04              | 12514706                       | (G/A)       |
| 5973        | CakSNP5973     | <i>Kabuli</i>    | Ca_Kabuli_Chr04              | 12525328                       | (A/G)       |
| 5974        | CakSNP5974     | <i>Kabuli</i>    | Ca_Kabuli_Chr04              | 12525358                       | (C/G)       |
| 5975        | CakSNP5975     | <i>Kabuli</i>    | Ca_Kabuli_Chr04              | 12525639                       | (T/A)       |
| 5976        | CakSNP5976     | <i>Kabuli</i>    | Ca_Kabuli_Chr04              | 12534847                       | (T/C)       |
| 5977        | CakSNP5977     | <i>Kabuli</i>    | Ca_Kabuli_Chr04              | 12558541                       | (T/C)       |
| 5978        | CakSNP5978     | <i>Kabuli</i>    | Ca_Kabuli_Chr04              | 12558680                       | (C/T)       |
| 5979        | CakSNP5979     | <i>Kabuli</i>    | Ca_Kabuli_Chr04              | 12568707                       | (G/A)       |
| 5980        | CakSNP5980     | <i>Kabuli</i>    | Ca_Kabuli_Chr04              | 12568845                       | (G/T)       |
| 5981        | CakSNP5981     | <i>Kabuli</i>    | Ca_Kabuli_Chr04              | 12568905                       | (G/A)       |
| 5982        | CakSNP5982     | <i>Kabuli</i>    | Ca_Kabuli_Chr04              | 12568944                       | (A/G)       |
| 5983        | CakSNP5983     | <i>Kabuli</i>    | Ca_Kabuli_Chr04              | 12568995                       | (G/A)       |
| 5984        | CakSNP5984     | <i>Kabuli</i>    | Ca_Kabuli_Chr04              | 12569133                       | (G/A)       |
| 5985        | CakSNP5985     | <i>Kabuli</i>    | Ca_Kabuli_Chr04              | 12574650                       | (G/A)       |
| 5986        | CakSNP5986     | <i>Kabuli</i>    | Ca_Kabuli_Chr04              | 12578259                       | (A/G)       |
| 5987        | CakSNP5987     | <i>Kabuli</i>    | Ca_Kabuli_Chr04              | 12578350                       | (A/G)       |
| 5988        | CakSNP5988     | <i>Kabuli</i>    | Ca_Kabuli_Chr04              | 12581371                       | (G/T)       |
| 5989        | CakSNP5989     | <i>Kabuli</i>    | Ca_Kabuli_Chr04              | 12692925                       | (C/T)       |
| 5990        | CakSNP5990     | <i>Kabuli</i>    | Ca_Kabuli_Chr04              | 12692958                       | (G/C)       |
| 5991        | CakSNP5991     | <i>Kabuli</i>    | Ca_Kabuli_Chr04              | 12693000                       | (T/C)       |
| 5992        | CakSNP5992     | <i>Kabuli</i>    | Ca_Kabuli_Chr04              | 12740330                       | (A/G)       |
| 5993        | CakSNP5993     | <i>Kabuli</i>    | Ca_Kabuli_Chr04              | 12740351                       | (T/G)       |
| 5994        | CakSNP5994     | <i>Kabuli</i>    | Ca_Kabuli_Chr04              | 12779146                       | (A/C)       |
| 5995        | CakSNP5995     | <i>Kabuli</i>    | Ca_Kabuli_Chr04              | 12780274                       | (C/T)       |
| 5996        | CakSNP5996     | <i>Kabuli</i>    | Ca_Kabuli_Chr04              | 12795036                       | (G/A)       |
| 5997        | CakSNP5997     | <i>Kabuli</i>    | Ca_Kabuli_Chr04              | 12795037                       | (G/A)       |
| 5998        | CakSNP5998     | <i>Kabuli</i>    | Ca_Kabuli_Chr04              | 12869023                       | (C/T)       |
| 5999        | CakSNP5999     | <i>Kabuli</i>    | Ca_Kabuli_Chr04              | 12869049                       | (C/T)       |
| 6000        | CakSNP6000     | <i>Kabuli</i>    | Ca_Kabuli_Chr04              | 12907910                       | (C/A)       |
| 6001        | CakSNP6001     | <i>Kabuli</i>    | Ca_Kabuli_Chr04              | 12908080                       | (C/T)       |
| 6002        | CakSNP6002     | <i>Kabuli</i>    | Ca_Kabuli_Chr04              | 12911860                       | (A/G)       |
| 6003        | CakSNP6003     | <i>Kabuli</i>    | Ca_Kabuli_Chr04              | 12911874                       | (T/C)       |



| <b>S.N.</b> | <b>SNP IDs</b> | <b>Cultivars</b> | <b>Chromosomes/scaffolds</b> | <b>Physical positions (bp)</b> | <b>SNPs</b> |
|-------------|----------------|------------------|------------------------------|--------------------------------|-------------|
| 6004        | CakSNP6004     | <i>Kabuli</i>    | Ca_Kabuli_Chr04              | 12911888                       | (G/C)       |
| 6005        | CakSNP6005     | <i>Kabuli</i>    | Ca_Kabuli_Chr04              | 12912015                       | (G/A)       |
| 6006        | CakSNP6006     | <i>Kabuli</i>    | Ca_Kabuli_Chr04              | 12955130                       | (G/A)       |
| 6007        | CakSNP6007     | <i>Kabuli</i>    | Ca_Kabuli_Chr04              | 12973657                       | (C/A)       |
| 6008        | CakSNP6008     | <i>Kabuli</i>    | Ca_Kabuli_Chr04              | 12982420                       | (G/A)       |
| 6009        | CakSNP6009     | <i>Kabuli</i>    | Ca_Kabuli_Chr04              | 13018788                       | (C/G)       |
| 6010        | CakSNP6010     | <i>Kabuli</i>    | Ca_Kabuli_Chr04              | 13020891                       | (A/G)       |
| 6011        | CakSNP6011     | <i>Kabuli</i>    | Ca_Kabuli_Chr04              | 13050470                       | (T/C)       |
| 6012        | CakSNP6012     | <i>Kabuli</i>    | Ca_Kabuli_Chr04              | 13050516                       | (A/G)       |
| 6013        | CakSNP6013     | <i>Kabuli</i>    | Ca_Kabuli_Chr04              | 13050527                       | (C/T)       |
| 6014        | CakSNP6014     | <i>Kabuli</i>    | Ca_Kabuli_Chr04              | 13050585                       | (C/T)       |
| 6015        | CakSNP6015     | <i>Kabuli</i>    | Ca_Kabuli_Chr04              | 13062744                       | (T/A)       |
| 6016        | CakSNP6016     | <i>Kabuli</i>    | Ca_Kabuli_Chr04              | 13062761                       | (A/T)       |
| 6017        | CakSNP6017     | <i>Kabuli</i>    | Ca_Kabuli_Chr04              | 13062805                       | (C/G)       |
| 6018        | CakSNP6018     | <i>Kabuli</i>    | Ca_Kabuli_Chr04              | 13062972                       | (A/T)       |
| 6019        | CakSNP6019     | <i>Kabuli</i>    | Ca_Kabuli_Chr04              | 13063689                       | (T/A)       |
| 6020        | CakSNP6020     | <i>Kabuli</i>    | Ca_Kabuli_Chr04              | 13063699                       | (G/T)       |
| 6021        | CakSNP6021     | <i>Kabuli</i>    | Ca_Kabuli_Chr04              | 13069574                       | (T/C)       |
| 6022        | CakSNP6022     | <i>Kabuli</i>    | Ca_Kabuli_Chr04              | 13071169                       | (T/A)       |
| 6023        | CakSNP6023     | <i>Kabuli</i>    | Ca_Kabuli_Chr04              | 13071199                       | (A/T)       |
| 6024        | CakSNP6024     | <i>Kabuli</i>    | Ca_Kabuli_Chr04              | 13071230                       | (T/G)       |
| 6025        | CakSNP6025     | <i>Kabuli</i>    | Ca_Kabuli_Chr04              | 13072114                       | (T/A)       |
| 6026        | CakSNP6026     | <i>Kabuli</i>    | Ca_Kabuli_Chr04              | 13072118                       | (T/G)       |
| 6027        | CakSNP6027     | <i>Kabuli</i>    | Ca_Kabuli_Chr04              | 13072208                       | (C/A)       |
| 6028        | CakSNP6028     | <i>Kabuli</i>    | Ca_Kabuli_Chr04              | 13082999                       | (A/G)       |
| 6029        | CakSNP6029     | <i>Kabuli</i>    | Ca_Kabuli_Chr04              | 13102381                       | (G/A)       |
| 6030        | CakSNP6030     | <i>Kabuli</i>    | Ca_Kabuli_Chr04              | 13102348                       | (G/T)       |
| 6031        | CakSNP6031     | <i>Kabuli</i>    | Ca_Kabuli_Chr04              | 13147948                       | (A/G)       |
| 6032        | CakSNP6032     | <i>Kabuli</i>    | Ca_Kabuli_Chr04              | 13147951                       | (C/T)       |
| 6033        | CakSNP6033     | <i>Kabuli</i>    | Ca_Kabuli_Chr04              | 13147960                       | (T/C)       |
| 6034        | CakSNP6034     | <i>Kabuli</i>    | Ca_Kabuli_Chr04              | 13147965                       | (A/G)       |
| 6035        | CakSNP6035     | <i>Kabuli</i>    | Ca_Kabuli_Chr04              | 13148016                       | (G/A)       |
| 6036        | CakSNP6036     | <i>Kabuli</i>    | Ca_Kabuli_Chr04              | 13179829                       | (T/C)       |
| 6037        | CakSNP6037     | <i>Kabuli</i>    | Ca_Kabuli_Chr04              | 13203008                       | (A/T)       |
| 6038        | CakSNP6038     | <i>Kabuli</i>    | Ca_Kabuli_Chr04              | 13229035                       | (C/T)       |
| 6039        | CakSNP6039     | <i>Kabuli</i>    | Ca_Kabuli_Chr04              | 13252015                       | (A/T)       |
| 6040        | CakSNP6040     | <i>Kabuli</i>    | Ca_Kabuli_Chr04              | 13252077                       | (C/G)       |
| 6041        | CakSNP6041     | <i>Kabuli</i>    | Ca_Kabuli_Chr04              | 13252126                       | (T/C)       |

| <b>S.N.</b> | <b>SNP IDs</b> | <b>Cultivars</b> | <b>Chromosomes/scaffolds</b> | <b>Physical positions (bp)</b> | <b>SNPs</b> |
|-------------|----------------|------------------|------------------------------|--------------------------------|-------------|
| 6042        | CakSNP6042     | <i>Kabuli</i>    | Ca_Kabuli_Chr04              | 13252212                       | (G/A)       |
| 6043        | CakSNP6043     | <i>Kabuli</i>    | Ca_Kabuli_Chr04              | 13272282                       | (T/C)       |
| 6044        | CakSNP6044     | <i>Kabuli</i>    | Ca_Kabuli_Chr04              | 13282984                       | (A/C)       |
| 6045        | CakSNP6045     | <i>Kabuli</i>    | Ca_Kabuli_Chr04              | 13296221                       | (A/T)       |
| 6046        | CakSNP6046     | <i>Kabuli</i>    | Ca_Kabuli_Chr04              | 13296217                       | (G/T)       |
| 6047        | CakSNP6047     | <i>Kabuli</i>    | Ca_Kabuli_Chr04              | 13310700                       | (T/C)       |
| 6048        | CakSNP6048     | <i>Kabuli</i>    | Ca_Kabuli_Chr04              | 13318811                       | (C/T)       |
| 6049        | CakSNP6049     | <i>Kabuli</i>    | Ca_Kabuli_Chr04              | 13331280                       | (A/G)       |
| 6050        | CakSNP6050     | <i>Kabuli</i>    | Ca_Kabuli_Chr04              | 13332384                       | (G/A)       |
| 6051        | CakSNP6051     | <i>Kabuli</i>    | Ca_Kabuli_Chr04              | 13332452                       | (T/C)       |
| 6052        | CakSNP6052     | <i>Kabuli</i>    | Ca_Kabuli_Chr04              | 13376456                       | (A/T)       |
| 6053        | CakSNP6053     | <i>Kabuli</i>    | Ca_Kabuli_Chr04              | 13463481                       | (C/T)       |
| 6054        | CakSNP6054     | <i>Kabuli</i>    | Ca_Kabuli_Chr04              | 13500679                       | (A/C)       |
| 6055        | CakSNP6055     | <i>Kabuli</i>    | Ca_Kabuli_Chr04              | 13500693                       | (G/A)       |
| 6056        | CakSNP6056     | <i>Kabuli</i>    | Ca_Kabuli_Chr04              | 13588956                       | (C/T)       |
| 6057        | CakSNP6057     | <i>Kabuli</i>    | Ca_Kabuli_Chr04              | 13588928                       | (T/C)       |
| 6058        | CakSNP6058     | <i>Kabuli</i>    | Ca_Kabuli_Chr04              | 13646571                       | (T/C)       |
| 6059        | CakSNP6059     | <i>Kabuli</i>    | Ca_Kabuli_Chr04              | 13646628                       | (C/T)       |
| 6060        | CakSNP6060     | <i>Kabuli</i>    | Ca_Kabuli_Chr04              | 13687456                       | (G/A)       |
| 6061        | CakSNP6061     | <i>Kabuli</i>    | Ca_Kabuli_Chr04              | 13713380                       | (G/T)       |
| 6062        | CakSNP6062     | <i>Kabuli</i>    | Ca_Kabuli_Chr04              | 13713367                       | (G/C)       |
| 6063        | CakSNP6063     | <i>Kabuli</i>    | Ca_Kabuli_Chr04              | 13724666                       | (G/C)       |
| 6064        | CakSNP6064     | <i>Kabuli</i>    | Ca_Kabuli_Chr04              | 13787448                       | (A/C)       |
| 6065        | CakSNP6065     | <i>Kabuli</i>    | Ca_Kabuli_Chr04              | 13787649                       | (T/C)       |
| 6066        | CakSNP6066     | <i>Kabuli</i>    | Ca_Kabuli_Chr04              | 13787720                       | (G/C)       |
| 6067        | CakSNP6067     | <i>Kabuli</i>    | Ca_Kabuli_Chr04              | 13823667                       | (T/A)       |
| 6068        | CakSNP6068     | <i>Kabuli</i>    | Ca_Kabuli_Chr04              | 13823672                       | (G/T)       |
| 6069        | CakSNP6069     | <i>Kabuli</i>    | Ca_Kabuli_Chr04              | 13823695                       | (T/C)       |
| 6070        | CakSNP6070     | <i>Kabuli</i>    | Ca_Kabuli_Chr04              | 13838241                       | (G/T)       |
| 6071        | CakSNP6071     | <i>Kabuli</i>    | Ca_Kabuli_Chr04              | 13838796                       | (A/G)       |
| 6072        | CakSNP6072     | <i>Kabuli</i>    | Ca_Kabuli_Chr04              | 13839294                       | (A/G)       |
| 6073        | CakSNP6073     | <i>Kabuli</i>    | Ca_Kabuli_Chr04              | 13839288                       | (G/A)       |
| 6074        | CakSNP6074     | <i>Kabuli</i>    | Ca_Kabuli_Chr04              | 13840191                       | (T/A)       |
| 6075        | CakSNP6075     | <i>Kabuli</i>    | Ca_Kabuli_Chr04              | 13840227                       | (C/A)       |
| 6076        | CakSNP6076     | <i>Kabuli</i>    | Ca_Kabuli_Chr04              | 13840251                       | (A/G)       |
| 6077        | CakSNP6077     | <i>Kabuli</i>    | Ca_Kabuli_Chr04              | 13840484                       | (T/C)       |
| 6078        | CakSNP6078     | <i>Kabuli</i>    | Ca_Kabuli_Chr04              | 13841340                       | (G/T)       |
| 6079        | CakSNP6079     | <i>Kabuli</i>    | Ca_Kabuli_Chr04              | 13841401                       | (A/G)       |

| <b>S.N.</b> | <b>SNP IDs</b> | <b>Cultivars</b> | <b>Chromosomes/scaffolds</b> | <b>Physical positions (bp)</b> | <b>SNPs</b> |
|-------------|----------------|------------------|------------------------------|--------------------------------|-------------|
| 6080        | CakSNP6080     | <i>Kabuli</i>    | Ca_Kabuli_Chr04              | 13845581                       | (A/T)       |
| 6081        | CakSNP6081     | <i>Kabuli</i>    | Ca_Kabuli_Chr04              | 13845639                       | (A/C)       |
| 6082        | CakSNP6082     | <i>Kabuli</i>    | Ca_Kabuli_Chr04              | 13845675                       | (T/A)       |
| 6083        | CakSNP6083     | <i>Kabuli</i>    | Ca_Kabuli_Chr04              | 13900013                       | (A/G)       |
| 6084        | CakSNP6084     | <i>Kabuli</i>    | Ca_Kabuli_Chr04              | 13923366                       | (T/C)       |
| 6085        | CakSNP6085     | <i>Kabuli</i>    | Ca_Kabuli_Chr04              | 13949513                       | (A/C)       |
| 6086        | CakSNP6086     | <i>Kabuli</i>    | Ca_Kabuli_Chr04              | 13949580                       | (C/G)       |
| 6087        | CakSNP6087     | <i>Kabuli</i>    | Ca_Kabuli_Chr04              | 13954832                       | (G/A)       |
| 6088        | CakSNP6088     | <i>Kabuli</i>    | Ca_Kabuli_Chr04              | 13968291                       | (C/T)       |
| 6089        | CakSNP6089     | <i>Kabuli</i>    | Ca_Kabuli_Chr04              | 13968397                       | (A/G)       |
| 6090        | CakSNP6090     | <i>Kabuli</i>    | Ca_Kabuli_Chr04              | 13968354                       | (A/G)       |
| 6091        | CakSNP6091     | <i>Kabuli</i>    | Ca_Kabuli_Chr04              | 13982970                       | (G/A)       |
| 6092        | CakSNP6092     | <i>Kabuli</i>    | Ca_Kabuli_Chr04              | 14031548                       | (A/G)       |
| 6093        | CakSNP6093     | <i>Kabuli</i>    | Ca_Kabuli_Chr04              | 14056908                       | (A/G)       |
| 6094        | CakSNP6094     | <i>Kabuli</i>    | Ca_Kabuli_Chr04              | 14073059                       | (C/T)       |
| 6095        | CakSNP6095     | <i>Kabuli</i>    | Ca_Kabuli_Chr04              | 14073056                       | (C/T)       |
| 6096        | CakSNP6096     | <i>Kabuli</i>    | Ca_Kabuli_Chr04              | 14073045                       | (G/A)       |
| 6097        | CakSNP6097     | <i>Kabuli</i>    | Ca_Kabuli_Chr04              | 14073044                       | (C/T)       |
| 6098        | CakSNP6098     | <i>Kabuli</i>    | Ca_Kabuli_Chr04              | 14073004                       | (C/A)       |
| 6099        | CakSNP6099     | <i>Kabuli</i>    | Ca_Kabuli_Chr04              | 14082157                       | (C/A)       |
| 6100        | CakSNP6100     | <i>Kabuli</i>    | Ca_Kabuli_Chr04              | 14082158                       | (T/G)       |
| 6101        | CakSNP6101     | <i>Kabuli</i>    | Ca_Kabuli_Chr04              | 14082186                       | (G/A)       |
| 6102        | CakSNP6102     | <i>Kabuli</i>    | Ca_Kabuli_Chr04              | 14082210                       | (T/C)       |
| 6103        | CakSNP6103     | <i>Kabuli</i>    | Ca_Kabuli_Chr04              | 14082285                       | (C/G)       |
| 6104        | CakSNP6104     | <i>Kabuli</i>    | Ca_Kabuli_Chr04              | 14093027                       | (A/G)       |
| 6105        | CakSNP6105     | <i>Kabuli</i>    | Ca_Kabuli_Chr04              | 14104096                       | (A/C)       |
| 6106        | CakSNP6106     | <i>Kabuli</i>    | Ca_Kabuli_Chr04              | 14112911                       | (C/A)       |
| 6107        | CakSNP6107     | <i>Kabuli</i>    | Ca_Kabuli_Chr04              | 14132659                       | (A/C)       |
| 6108        | CakSNP6108     | <i>Kabuli</i>    | Ca_Kabuli_Chr04              | 14149589                       | (G/A)       |
| 6109        | CakSNP6109     | <i>Kabuli</i>    | Ca_Kabuli_Chr04              | 14149588                       | (A/G)       |
| 6110        | CakSNP6110     | <i>Kabuli</i>    | Ca_Kabuli_Chr04              | 14155978                       | (A/G)       |
| 6111        | CakSNP6111     | <i>Kabuli</i>    | Ca_Kabuli_Chr04              | 14156014                       | (C/T)       |
| 6112        | CakSNP6112     | <i>Kabuli</i>    | Ca_Kabuli_Chr04              | 14163060                       | (C/T)       |
| 6113        | CakSNP6113     | <i>Kabuli</i>    | Ca_Kabuli_Chr04              | 14181527                       | (A/G)       |
| 6114        | CakSNP6114     | <i>Kabuli</i>    | Ca_Kabuli_Chr04              | 14189356                       | (A/C)       |
| 6115        | CakSNP6115     | <i>Kabuli</i>    | Ca_Kabuli_Chr04              | 14199191                       | (G/C)       |
| 6116        | CakSNP6116     | <i>Kabuli</i>    | Ca_Kabuli_Chr04              | 14225284                       | (A/G)       |
| 6117        | CakSNP6117     | <i>Kabuli</i>    | Ca_Kabuli_Chr04              | 14270811                       | (G/A)       |

| <b>S.N.</b> | <b>SNP IDs</b> | <b>Cultivars</b> | <b>Chromosomes/scaffolds</b> | <b>Physical positions (bp)</b> | <b>SNPs</b> |
|-------------|----------------|------------------|------------------------------|--------------------------------|-------------|
| 6118        | CakSNP6118     | <i>Kabuli</i>    | Ca_Kabuli_Chr04              | 14270763                       | (G/A)       |
| 6119        | CakSNP6119     | <i>Kabuli</i>    | Ca_Kabuli_Chr04              | 14453942                       | (T/C)       |
| 6120        | CakSNP6120     | <i>Kabuli</i>    | Ca_Kabuli_Chr04              | 14515543                       | (T/A)       |
| 6121        | CakSNP6121     | <i>Kabuli</i>    | Ca_Kabuli_Chr04              | 14515531                       | (T/A)       |
| 6122        | CakSNP6122     | <i>Kabuli</i>    | Ca_Kabuli_Chr04              | 14517424                       | (C/T)       |
| 6123        | CakSNP6123     | <i>Kabuli</i>    | Ca_Kabuli_Chr04              | 14529007                       | (A/G)       |
| 6124        | CakSNP6124     | <i>Kabuli</i>    | Ca_Kabuli_Chr04              | 14565948                       | (A/C)       |
| 6125        | CakSNP6125     | <i>Kabuli</i>    | Ca_Kabuli_Chr04              | 14566064                       | (G/A)       |
| 6126        | CakSNP6126     | <i>Kabuli</i>    | Ca_Kabuli_Chr04              | 14566074                       | (T/A)       |
| 6127        | CakSNP6127     | <i>Kabuli</i>    | Ca_Kabuli_Chr04              | 14566081                       | (A/G)       |
| 6128        | CakSNP6128     | <i>Kabuli</i>    | Ca_Kabuli_Chr04              | 14611177                       | (A/G)       |
| 6129        | CakSNP6129     | <i>Kabuli</i>    | Ca_Kabuli_Chr04              | 14657743                       | (C/T)       |
| 6130        | CakSNP6130     | <i>Kabuli</i>    | Ca_Kabuli_Chr04              | 14696775                       | (T/C)       |
| 6131        | CakSNP6131     | <i>Kabuli</i>    | Ca_Kabuli_Chr04              | 14698825                       | (A/T)       |
| 6132        | CakSNP6132     | <i>Kabuli</i>    | Ca_Kabuli_Chr04              | 14699270                       | (T/C)       |
| 6133        | CakSNP6133     | <i>Kabuli</i>    | Ca_Kabuli_Chr04              | 14748051                       | (A/C)       |
| 6134        | CakSNP6134     | <i>Kabuli</i>    | Ca_Kabuli_Chr04              | 14770484                       | (C/T)       |
| 6135        | CakSNP6135     | <i>Kabuli</i>    | Ca_Kabuli_Chr04              | 14770524                       | (G/C)       |
| 6136        | CakSNP6136     | <i>Kabuli</i>    | Ca_Kabuli_Chr04              | 14770525                       | (G/A)       |
| 6137        | CakSNP6137     | <i>Kabuli</i>    | Ca_Kabuli_Chr04              | 14770532                       | (C/T)       |
| 6138        | CakSNP6138     | <i>Kabuli</i>    | Ca_Kabuli_Chr04              | 14785530                       | (G/A)       |
| 6139        | CakSNP6139     | <i>Kabuli</i>    | Ca_Kabuli_Chr04              | 14785557                       | (A/C)       |
| 6140        | CakSNP6140     | <i>Kabuli</i>    | Ca_Kabuli_Chr04              | 14786093                       | (C/G)       |
| 6141        | CakSNP6141     | <i>Kabuli</i>    | Ca_Kabuli_Chr04              | 14831204                       | (A/T)       |
| 6142        | CakSNP6142     | <i>Kabuli</i>    | Ca_Kabuli_Chr04              | 14831298                       | (A/T)       |
| 6143        | CakSNP6143     | <i>Kabuli</i>    | Ca_Kabuli_Chr04              | 14855406                       | (T/C)       |
| 6144        | CakSNP6144     | <i>Kabuli</i>    | Ca_Kabuli_Chr04              | 14855417                       | (T/A)       |
| 6145        | CakSNP6145     | <i>Kabuli</i>    | Ca_Kabuli_Chr04              | 14870658                       | (T/G)       |
| 6146        | CakSNP6146     | <i>Kabuli</i>    | Ca_Kabuli_Chr04              | 14870641                       | (G/A)       |
| 6147        | CakSNP6147     | <i>Kabuli</i>    | Ca_Kabuli_Chr04              | 14989557                       | (C/T)       |
| 6148        | CakSNP6148     | <i>Kabuli</i>    | Ca_Kabuli_Chr04              | 14989544                       | (C/T)       |
| 6149        | CakSNP6149     | <i>Kabuli</i>    | Ca_Kabuli_Chr04              | 14989526                       | (G/A)       |
| 6150        | CakSNP6150     | <i>Kabuli</i>    | Ca_Kabuli_Chr04              | 15025765                       | (T/A)       |
| 6151        | CakSNP6151     | <i>Kabuli</i>    | Ca_Kabuli_Chr04              | 15025785                       | (T/G)       |
| 6152        | CakSNP6152     | <i>Kabuli</i>    | Ca_Kabuli_Chr04              | 15026058                       | (C/T)       |
| 6153        | CakSNP6153     | <i>Kabuli</i>    | Ca_Kabuli_Chr04              | 15036362                       | (A/G)       |
| 6154        | CakSNP6154     | <i>Kabuli</i>    | Ca_Kabuli_Chr04              | 15039897                       | (C/G)       |
| 6155        | CakSNP6155     | <i>Kabuli</i>    | Ca_Kabuli_Chr04              | 15039905                       | (T/C)       |

| <b>S.N.</b> | <b>SNP IDs</b> | <b>Cultivars</b> | <b>Chromosomes/scaffolds</b> | <b>Physical positions (bp)</b> | <b>SNPs</b> |
|-------------|----------------|------------------|------------------------------|--------------------------------|-------------|
| 6156        | CakSNP6156     | <i>Kabuli</i>    | Ca_Kabuli_Chr04              | 15039948                       | (G/C)       |
| 6157        | CakSNP6157     | <i>Kabuli</i>    | Ca_Kabuli_Chr04              | 15039996                       | (C/T)       |
| 6158        | CakSNP6158     | <i>Kabuli</i>    | Ca_Kabuli_Chr04              | 15040072                       | (A/C)       |
| 6159        | CakSNP6159     | <i>Kabuli</i>    | Ca_Kabuli_Chr04              | 15053643                       | (T/C)       |
| 6160        | CakSNP6160     | <i>Kabuli</i>    | Ca_Kabuli_Chr04              | 15075489                       | (T/G)       |
| 6161        | CakSNP6161     | <i>Kabuli</i>    | Ca_Kabuli_Chr04              | 15075502                       | (G/T)       |
| 6162        | CakSNP6162     | <i>Kabuli</i>    | Ca_Kabuli_Chr04              | 15159143                       | (A/G)       |
| 6163        | CakSNP6163     | <i>Kabuli</i>    | Ca_Kabuli_Chr04              | 15190387                       | (T/G)       |
| 6164        | CakSNP6164     | <i>Kabuli</i>    | Ca_Kabuli_Chr04              | 15190423                       | (T/A)       |
| 6165        | CakSNP6165     | <i>Kabuli</i>    | Ca_Kabuli_Chr04              | 15212787                       | (G/A)       |
| 6166        | CakSNP6166     | <i>Kabuli</i>    | Ca_Kabuli_Chr04              | 15240675                       | (G/A)       |
| 6167        | CakSNP6167     | <i>Kabuli</i>    | Ca_Kabuli_Chr04              | 15240678                       | (T/C)       |
| 6168        | CakSNP6168     | <i>Kabuli</i>    | Ca_Kabuli_Chr04              | 15299232                       | (G/A)       |
| 6169        | CakSNP6169     | <i>Kabuli</i>    | Ca_Kabuli_Chr04              | 15320777                       | (G/A)       |
| 6170        | CakSNP6170     | <i>Kabuli</i>    | Ca_Kabuli_Chr04              | 15357651                       | (C/T)       |
| 6171        | CakSNP6171     | <i>Kabuli</i>    | Ca_Kabuli_Chr04              | 15357695                       | (A/G)       |
| 6172        | CakSNP6172     | <i>Kabuli</i>    | Ca_Kabuli_Chr04              | 15394470                       | (T/C)       |
| 6173        | CakSNP6173     | <i>Kabuli</i>    | Ca_Kabuli_Chr04              | 15448826                       | (G/T)       |
| 6174        | CakSNP6174     | <i>Kabuli</i>    | Ca_Kabuli_Chr04              | 15449843                       | (A/G)       |
| 6175        | CakSNP6175     | <i>Kabuli</i>    | Ca_Kabuli_Chr04              | 15542543                       | (T/C)       |
| 6176        | CakSNP6176     | <i>Kabuli</i>    | Ca_Kabuli_Chr04              | 15542597                       | (A/G)       |
| 6177        | CakSNP6177     | <i>Kabuli</i>    | Ca_Kabuli_Chr04              | 15552690                       | (C/T)       |
| 6178        | CakSNP6178     | <i>Kabuli</i>    | Ca_Kabuli_Chr04              | 15552683                       | (C/T)       |
| 6179        | CakSNP6179     | <i>Kabuli</i>    | Ca_Kabuli_Chr04              | 15697128                       | (A/G)       |
| 6180        | CakSNP6180     | <i>Kabuli</i>    | Ca_Kabuli_Chr04              | 15697303                       | (G/T)       |
| 6181        | CakSNP6181     | <i>Kabuli</i>    | Ca_Kabuli_Chr04              | 15698212                       | (G/T)       |
| 6182        | CakSNP6182     | <i>Kabuli</i>    | Ca_Kabuli_Chr04              | 15698179                       | (G/A)       |
| 6183        | CakSNP6183     | <i>Kabuli</i>    | Ca_Kabuli_Chr04              | 15698233                       | (A/C)       |
| 6184        | CakSNP6184     | <i>Kabuli</i>    | Ca_Kabuli_Chr04              | 15698305                       | (T/C)       |
| 6185        | CakSNP6185     | <i>Kabuli</i>    | Ca_Kabuli_Chr04              | 15698405                       | (G/A)       |
| 6186        | CakSNP6186     | <i>Kabuli</i>    | Ca_Kabuli_Chr04              | 15698486                       | (T/C)       |
| 6187        | CakSNP6187     | <i>Kabuli</i>    | Ca_Kabuli_Chr04              | 15698456                       | (T/C)       |
| 6188        | CakSNP6188     | <i>Kabuli</i>    | Ca_Kabuli_Chr04              | 15698444                       | (C/T)       |
| 6189        | CakSNP6189     | <i>Kabuli</i>    | Ca_Kabuli_Chr04              | 15698420                       | (G/C)       |
| 6190        | CakSNP6190     | <i>Kabuli</i>    | Ca_Kabuli_Chr04              | 15700603                       | (A/T)       |
| 6191        | CakSNP6191     | <i>Kabuli</i>    | Ca_Kabuli_Chr04              | 15700630                       | (G/A)       |
| 6192        | CakSNP6192     | <i>Kabuli</i>    | Ca_Kabuli_Chr04              | 15713955                       | (G/A)       |
| 6193        | CakSNP6193     | <i>Kabuli</i>    | Ca_Kabuli_Chr04              | 15717281                       | (T/C)       |

| <b>S.N.</b> | <b>SNP IDs</b> | <b>Cultivars</b> | <b>Chromosomes/scaffolds</b> | <b>Physical positions (bp)</b> | <b>SNPs</b> |
|-------------|----------------|------------------|------------------------------|--------------------------------|-------------|
| 6194        | CakSNP6194     | <i>Kabuli</i>    | Ca_Kabuli_Chr04              | 15735993                       | (T/C)       |
| 6195        | CakSNP6195     | <i>Kabuli</i>    | Ca_Kabuli_Chr04              | 15736015                       | (C/T)       |
| 6196        | CakSNP6196     | <i>Kabuli</i>    | Ca_Kabuli_Chr04              | 15736562                       | (A/T)       |
| 6197        | CakSNP6197     | <i>Kabuli</i>    | Ca_Kabuli_Chr04              | 15736619                       | (T/G)       |
| 6198        | CakSNP6198     | <i>Kabuli</i>    | Ca_Kabuli_Chr04              | 15736627                       | (T/C)       |
| 6199        | CakSNP6199     | <i>Kabuli</i>    | Ca_Kabuli_Chr04              | 15744703                       | (T/G)       |
| 6200        | CakSNP6200     | <i>Kabuli</i>    | Ca_Kabuli_Chr04              | 15752567                       | (G/C)       |
| 6201        | CakSNP6201     | <i>Kabuli</i>    | Ca_Kabuli_Chr04              | 15766341                       | (A/G)       |
| 6202        | CakSNP6202     | <i>Kabuli</i>    | Ca_Kabuli_Chr04              | 15766360                       | (G/A)       |
| 6203        | CakSNP6203     | <i>Kabuli</i>    | Ca_Kabuli_Chr04              | 15772235                       | (C/A)       |
| 6204        | CakSNP6204     | <i>Kabuli</i>    | Ca_Kabuli_Chr04              | 15772275                       | (A/G)       |
| 6205        | CakSNP6205     | <i>Kabuli</i>    | Ca_Kabuli_Chr04              | 15821282                       | (G/A)       |
| 6206        | CakSNP6206     | <i>Kabuli</i>    | Ca_Kabuli_Chr04              | 15821311                       | (T/A)       |
| 6207        | CakSNP6207     | <i>Kabuli</i>    | Ca_Kabuli_Chr04              | 15825621                       | (A/T)       |
| 6208        | CakSNP6208     | <i>Kabuli</i>    | Ca_Kabuli_Chr04              | 15860388                       | (A/G)       |
| 6209        | CakSNP6209     | <i>Kabuli</i>    | Ca_Kabuli_Chr04              | 15860359                       | (C/A)       |
| 6210        | CakSNP6210     | <i>Kabuli</i>    | Ca_Kabuli_Chr04              | 15900602                       | (G/A)       |
| 6211        | CakSNP6211     | <i>Kabuli</i>    | Ca_Kabuli_Chr04              | 15925936                       | (T/G)       |
| 6212        | CakSNP6212     | <i>Kabuli</i>    | Ca_Kabuli_Chr04              | 15926160                       | (A/G)       |
| 6213        | CakSNP6213     | <i>Kabuli</i>    | Ca_Kabuli_Chr04              | 15934607                       | (A/T)       |
| 6214        | CakSNP6214     | <i>Kabuli</i>    | Ca_Kabuli_Chr04              | 15934901                       | (T/G)       |
| 6215        | CakSNP6215     | <i>Kabuli</i>    | Ca_Kabuli_Chr04              | 15957070                       | (T/A)       |
| 6216        | CakSNP6216     | <i>Kabuli</i>    | Ca_Kabuli_Chr04              | 16027272                       | (G/A)       |
| 6217        | CakSNP6217     | <i>Kabuli</i>    | Ca_Kabuli_Chr04              | 16027292                       | (A/C)       |
| 6218        | CakSNP6218     | <i>Kabuli</i>    | Ca_Kabuli_Chr04              | 16027368                       | (G/T)       |
| 6219        | CakSNP6219     | <i>Kabuli</i>    | Ca_Kabuli_Chr04              | 16027299                       | (T/A)       |
| 6220        | CakSNP6220     | <i>Kabuli</i>    | Ca_Kabuli_Chr04              | 16045694                       | (T/G)       |
| 6221        | CakSNP6221     | <i>Kabuli</i>    | Ca_Kabuli_Chr04              | 16045870                       | (G/A)       |
| 6222        | CakSNP6222     | <i>Kabuli</i>    | Ca_Kabuli_Chr04              | 16046928                       | (T/C)       |
| 6223        | CakSNP6223     | <i>Kabuli</i>    | Ca_Kabuli_Chr04              | 16278600                       | (C/T)       |
| 6224        | CakSNP6224     | <i>Kabuli</i>    | Ca_Kabuli_Chr04              | 16278671                       | (T/A)       |
| 6225        | CakSNP6225     | <i>Kabuli</i>    | Ca_Kabuli_Chr04              | 16446305                       | (T/C)       |
| 6226        | CakSNP6226     | <i>Kabuli</i>    | Ca_Kabuli_Chr04              | 16446341                       | (T/G)       |
| 6227        | CakSNP6227     | <i>Kabuli</i>    | Ca_Kabuli_Chr04              | 16446336                       | (C/G)       |
| 6228        | CakSNP6228     | <i>Kabuli</i>    | Ca_Kabuli_Chr04              | 16446956                       | (T/C)       |
| 6229        | CakSNP6229     | <i>Kabuli</i>    | Ca_Kabuli_Chr04              | 16457940                       | (G/A)       |
| 6230        | CakSNP6230     | <i>Kabuli</i>    | Ca_Kabuli_Chr04              | 16501291                       | (T/A)       |
| 6231        | CakSNP6231     | <i>Kabuli</i>    | Ca_Kabuli_Chr04              | 16501306                       | (T/A)       |

| <b>S.N.</b> | <b>SNP IDs</b> | <b>Cultivars</b> | <b>Chromosomes/scaffolds</b> | <b>Physical positions (bp)</b> | <b>SNPs</b> |
|-------------|----------------|------------------|------------------------------|--------------------------------|-------------|
| 6232        | CakSNP6232     | <i>Kabuli</i>    | Ca_Kabuli_Chr04              | 16501354                       | (C/T)       |
| 6233        | CakSNP6233     | <i>Kabuli</i>    | Ca_Kabuli_Chr04              | 16501782                       | (G/A)       |
| 6234        | CakSNP6234     | <i>Kabuli</i>    | Ca_Kabuli_Chr04              | 16501781                       | (C/A)       |
| 6235        | CakSNP6235     | <i>Kabuli</i>    | Ca_Kabuli_Chr04              | 16501769                       | (C/T)       |
| 6236        | CakSNP6236     | <i>Kabuli</i>    | Ca_Kabuli_Chr04              | 16501738                       | (G/A)       |
| 6237        | CakSNP6237     | <i>Kabuli</i>    | Ca_Kabuli_Chr04              | 16501716                       | (T/C)       |
| 6238        | CakSNP6238     | <i>Kabuli</i>    | Ca_Kabuli_Chr04              | 16505159                       | (A/G)       |
| 6239        | CakSNP6239     | <i>Kabuli</i>    | Ca_Kabuli_Chr04              | 16536754                       | (C/T)       |
| 6240        | CakSNP6240     | <i>Kabuli</i>    | Ca_Kabuli_Chr04              | 16571288                       | (T/C)       |
| 6241        | CakSNP6241     | <i>Kabuli</i>    | Ca_Kabuli_Chr04              | 16586863                       | (G/C)       |
| 6242        | CakSNP6242     | <i>Kabuli</i>    | Ca_Kabuli_Chr04              | 16586913                       | (G/C)       |
| 6243        | CakSNP6243     | <i>Kabuli</i>    | Ca_Kabuli_Chr04              | 16586929                       | (G/C)       |
| 6244        | CakSNP6244     | <i>Kabuli</i>    | Ca_Kabuli_Chr04              | 16619312                       | (T/C)       |
| 6245        | CakSNP6245     | <i>Kabuli</i>    | Ca_Kabuli_Chr04              | 16622514                       | (C/A)       |
| 6246        | CakSNP6246     | <i>Kabuli</i>    | Ca_Kabuli_Chr04              | 16625148                       | (T/G)       |
| 6247        | CakSNP6247     | <i>Kabuli</i>    | Ca_Kabuli_Chr04              | 16625270                       | (T/G)       |
| 6248        | CakSNP6248     | <i>Kabuli</i>    | Ca_Kabuli_Chr04              | 16625221                       | (G/A)       |
| 6249        | CakSNP6249     | <i>Kabuli</i>    | Ca_Kabuli_Chr04              | 16628559                       | (T/G)       |
| 6250        | CakSNP6250     | <i>Kabuli</i>    | Ca_Kabuli_Chr04              | 16628591                       | (T/G)       |
| 6251        | CakSNP6251     | <i>Kabuli</i>    | Ca_Kabuli_Chr04              | 16628594                       | (T/G)       |
| 6252        | CakSNP6252     | <i>Kabuli</i>    | Ca_Kabuli_Chr04              | 16628542                       | (G/A)       |
| 6253        | CakSNP6253     | <i>Kabuli</i>    | Ca_Kabuli_Chr04              | 16628540                       | (G/A)       |
| 6254        | CakSNP6254     | <i>Kabuli</i>    | Ca_Kabuli_Chr04              | 16628536                       | (T/A)       |
| 6255        | CakSNP6255     | <i>Kabuli</i>    | Ca_Kabuli_Chr04              | 16628529                       | (C/A)       |
| 6256        | CakSNP6256     | <i>Kabuli</i>    | Ca_Kabuli_Chr04              | 16628527                       | (G/A)       |
| 6257        | CakSNP6257     | <i>Kabuli</i>    | Ca_Kabuli_Chr04              | 16628523                       | (T/C)       |
| 6258        | CakSNP6258     | <i>Kabuli</i>    | Ca_Kabuli_Chr04              | 16629560                       | (G/T)       |
| 6259        | CakSNP6259     | <i>Kabuli</i>    | Ca_Kabuli_Chr04              | 16629559                       | (T/G)       |
| 6260        | CakSNP6260     | <i>Kabuli</i>    | Ca_Kabuli_Chr04              | 16629638                       | (C/A)       |
| 6261        | CakSNP6261     | <i>Kabuli</i>    | Ca_Kabuli_Chr04              | 16630385                       | (G/T)       |
| 6262        | CakSNP6262     | <i>Kabuli</i>    | Ca_Kabuli_Chr04              | 16669916                       | (T/C)       |
| 6263        | CakSNP6263     | <i>Kabuli</i>    | Ca_Kabuli_Chr04              | 16749740                       | (A/G)       |
| 6264        | CakSNP6264     | <i>Kabuli</i>    | Ca_Kabuli_Chr04              | 16750416                       | (A/G)       |
| 6265        | CakSNP6265     | <i>Kabuli</i>    | Ca_Kabuli_Chr04              | 16751205                       | (T/C)       |
| 6266        | CakSNP6266     | <i>Kabuli</i>    | Ca_Kabuli_Chr04              | 16789476                       | (G/A)       |
| 6267        | CakSNP6267     | <i>Kabuli</i>    | Ca_Kabuli_Chr04              | 16789532                       | (A/C)       |
| 6268        | CakSNP6268     | <i>Kabuli</i>    | Ca_Kabuli_Chr04              | 16820726                       | (C/A)       |
| 6269        | CakSNP6269     | <i>Kabuli</i>    | Ca_Kabuli_Chr04              | 16837336                       | (T/A)       |

| <b>S.N.</b> | <b>SNP IDs</b> | <b>Cultivars</b> | <b>Chromosomes/scaffolds</b> | <b>Physical positions (bp)</b> | <b>SNPs</b> |
|-------------|----------------|------------------|------------------------------|--------------------------------|-------------|
| 6270        | CakSNP6270     | <i>Kabuli</i>    | Ca_Kabuli_Chr04              | 16839081                       | (T/A)       |
| 6271        | CakSNP6271     | <i>Kabuli</i>    | Ca_Kabuli_Chr04              | 16845299                       | (G/A)       |
| 6272        | CakSNP6272     | <i>Kabuli</i>    | Ca_Kabuli_Chr04              | 16889650                       | (A/T)       |
| 6273        | CakSNP6273     | <i>Kabuli</i>    | Ca_Kabuli_Chr04              | 16926545                       | (T/C)       |
| 6274        | CakSNP6274     | <i>Kabuli</i>    | Ca_Kabuli_Chr04              | 16926527                       | (T/A)       |
| 6275        | CakSNP6275     | <i>Kabuli</i>    | Ca_Kabuli_Chr04              | 16926614                       | (A/T)       |
| 6276        | CakSNP6276     | <i>Kabuli</i>    | Ca_Kabuli_Chr04              | 17028303                       | (A/G)       |
| 6277        | CakSNP6277     | <i>Kabuli</i>    | Ca_Kabuli_Chr04              | 17028368                       | (G/A)       |
| 6278        | CakSNP6278     | <i>Kabuli</i>    | Ca_Kabuli_Chr04              | 17028523                       | (C/T)       |
| 6279        | CakSNP6279     | <i>Kabuli</i>    | Ca_Kabuli_Chr04              | 17028495                       | (T/A)       |
| 6280        | CakSNP6280     | <i>Kabuli</i>    | Ca_Kabuli_Chr04              | 17032676                       | (T/C)       |
| 6281        | CakSNP6281     | <i>Kabuli</i>    | Ca_Kabuli_Chr04              | 17032673                       | (C/T)       |
| 6282        | CakSNP6282     | <i>Kabuli</i>    | Ca_Kabuli_Chr04              | 17059830                       | (G/A)       |
| 6283        | CakSNP6283     | <i>Kabuli</i>    | Ca_Kabuli_Chr04              | 17059833                       | (A/T)       |
| 6284        | CakSNP6284     | <i>Kabuli</i>    | Ca_Kabuli_Chr04              | 17059852                       | (T/C)       |
| 6285        | CakSNP6285     | <i>Kabuli</i>    | Ca_Kabuli_Chr04              | 17059866                       | (G/A)       |
| 6286        | CakSNP6286     | <i>Kabuli</i>    | Ca_Kabuli_Chr04              | 17059872                       | (A/G)       |
| 6287        | CakSNP6287     | <i>Kabuli</i>    | Ca_Kabuli_Chr04              | 17059887                       | (G/A)       |
| 6288        | CakSNP6288     | <i>Kabuli</i>    | Ca_Kabuli_Chr04              | 17093090                       | (C/G)       |
| 6289        | CakSNP6289     | <i>Kabuli</i>    | Ca_Kabuli_Chr04              | 17147875                       | (C/T)       |
| 6290        | CakSNP6290     | <i>Kabuli</i>    | Ca_Kabuli_Chr04              | 17147926                       | (T/C)       |
| 6291        | CakSNP6291     | <i>Kabuli</i>    | Ca_Kabuli_Chr04              | 17187560                       | (C/G)       |
| 6292        | CakSNP6292     | <i>Kabuli</i>    | Ca_Kabuli_Chr04              | 17191562                       | (T/A)       |
| 6293        | CakSNP6293     | <i>Kabuli</i>    | Ca_Kabuli_Chr04              | 17199316                       | (T/C)       |
| 6294        | CakSNP6294     | <i>Kabuli</i>    | Ca_Kabuli_Chr04              | 17199477                       | (G/A)       |
| 6295        | CakSNP6295     | <i>Kabuli</i>    | Ca_Kabuli_Chr04              | 17199432                       | (G/A)       |
| 6296        | CakSNP6296     | <i>Kabuli</i>    | Ca_Kabuli_Chr04              | 17202770                       | (A/G)       |
| 6297        | CakSNP6297     | <i>Kabuli</i>    | Ca_Kabuli_Chr04              | 17225334                       | (G/A)       |
| 6298        | CakSNP6298     | <i>Kabuli</i>    | Ca_Kabuli_Chr04              | 17264248                       | (C/A)       |
| 6299        | CakSNP6299     | <i>Kabuli</i>    | Ca_Kabuli_Chr04              | 17264592                       | (G/A)       |
| 6300        | CakSNP6300     | <i>Kabuli</i>    | Ca_Kabuli_Chr04              | 17264621                       | (C/G)       |
| 6301        | CakSNP6301     | <i>Kabuli</i>    | Ca_Kabuli_Chr04              | 17264637                       | (C/T)       |
| 6302        | CakSNP6302     | <i>Kabuli</i>    | Ca_Kabuli_Chr04              | 17282119                       | (T/C)       |
| 6303        | CakSNP6303     | <i>Kabuli</i>    | Ca_Kabuli_Chr04              | 17282139                       | (G/C)       |
| 6304        | CakSNP6304     | <i>Kabuli</i>    | Ca_Kabuli_Chr04              | 17282148                       | (G/C)       |
| 6305        | CakSNP6305     | <i>Kabuli</i>    | Ca_Kabuli_Chr04              | 17282336                       | (G/T)       |
| 6306        | CakSNP6306     | <i>Kabuli</i>    | Ca_Kabuli_Chr04              | 17282345                       | (G/C)       |
| 6307        | CakSNP6307     | <i>Kabuli</i>    | Ca_Kabuli_Chr04              | 17289594                       | (G/C)       |



| <b>S.N.</b> | <b>SNP IDs</b> | <b>Cultivars</b> | <b>Chromosomes/scaffolds</b> | <b>Physical positions (bp)</b> | <b>SNPs</b> |
|-------------|----------------|------------------|------------------------------|--------------------------------|-------------|
| 6308        | CakSNP6308     | <i>Kabuli</i>    | Ca_Kabuli_Chr04              | 17297498                       | (G/T)       |
| 6309        | CakSNP6309     | <i>Kabuli</i>    | Ca_Kabuli_Chr04              | 17297567                       | (G/A)       |
| 6310        | CakSNP6310     | <i>Kabuli</i>    | Ca_Kabuli_Chr04              | 17297563                       | (A/G)       |
| 6311        | CakSNP6311     | <i>Kabuli</i>    | Ca_Kabuli_Chr04              | 17309656                       | (A/C)       |
| 6312        | CakSNP6312     | <i>Kabuli</i>    | Ca_Kabuli_Chr04              | 17345431                       | (T/C)       |
| 6313        | CakSNP6313     | <i>Kabuli</i>    | Ca_Kabuli_Chr04              | 17345436                       | (G/T)       |
| 6314        | CakSNP6314     | <i>Kabuli</i>    | Ca_Kabuli_Chr04              | 17345439                       | (G/A)       |
| 6315        | CakSNP6315     | <i>Kabuli</i>    | Ca_Kabuli_Chr04              | 17345448                       | (T/G)       |
| 6316        | CakSNP6316     | <i>Kabuli</i>    | Ca_Kabuli_Chr04              | 17345500                       | (G/A)       |
| 6317        | CakSNP6317     | <i>Kabuli</i>    | Ca_Kabuli_Chr04              | 17345483                       | (C/A)       |
| 6318        | CakSNP6318     | <i>Kabuli</i>    | Ca_Kabuli_Chr04              | 17345454                       | (A/G)       |
| 6319        | CakSNP6319     | <i>Kabuli</i>    | Ca_Kabuli_Chr04              | 17358736                       | (C/T)       |
| 6320        | CakSNP6320     | <i>Kabuli</i>    | Ca_Kabuli_Chr04              | 17361143                       | (T/A)       |
| 6321        | CakSNP6321     | <i>Kabuli</i>    | Ca_Kabuli_Chr04              | 17396325                       | (A/G)       |
| 6322        | CakSNP6322     | <i>Kabuli</i>    | Ca_Kabuli_Chr04              | 17396349                       | (T/G)       |
| 6323        | CakSNP6323     | <i>Kabuli</i>    | Ca_Kabuli_Chr04              | 17396352                       | (T/G)       |
| 6324        | CakSNP6324     | <i>Kabuli</i>    | Ca_Kabuli_Chr04              | 17429456                       | (A/T)       |
| 6325        | CakSNP6325     | <i>Kabuli</i>    | Ca_Kabuli_Chr04              | 17429457                       | (A/T)       |
| 6326        | CakSNP6326     | <i>Kabuli</i>    | Ca_Kabuli_Chr04              | 17429468                       | (T/C)       |
| 6327        | CakSNP6327     | <i>Kabuli</i>    | Ca_Kabuli_Chr04              | 17429747                       | (G/A)       |
| 6328        | CakSNP6328     | <i>Kabuli</i>    | Ca_Kabuli_Chr04              | 17429742                       | (A/G)       |
| 6329        | CakSNP6329     | <i>Kabuli</i>    | Ca_Kabuli_Chr04              | 17429735                       | (A/G)       |
| 6330        | CakSNP6330     | <i>Kabuli</i>    | Ca_Kabuli_Chr04              | 17429699                       | (G/C)       |
| 6331        | CakSNP6331     | <i>Kabuli</i>    | Ca_Kabuli_Chr04              | 17433782                       | (G/A)       |
| 6332        | CakSNP6332     | <i>Kabuli</i>    | Ca_Kabuli_Chr04              | 17433914                       | (G/A)       |
| 6333        | CakSNP6333     | <i>Kabuli</i>    | Ca_Kabuli_Chr04              | 17444578                       | (A/C)       |
| 6334        | CakSNP6334     | <i>Kabuli</i>    | Ca_Kabuli_Chr04              | 17472129                       | (T/A)       |
| 6335        | CakSNP6335     | <i>Kabuli</i>    | Ca_Kabuli_Chr04              | 17472992                       | (T/G)       |
| 6336        | CakSNP6336     | <i>Kabuli</i>    | Ca_Kabuli_Chr04              | 17473174                       | (C/T)       |
| 6337        | CakSNP6337     | <i>Kabuli</i>    | Ca_Kabuli_Chr04              | 17473237                       | (T/C)       |
| 6338        | CakSNP6338     | <i>Kabuli</i>    | Ca_Kabuli_Chr04              | 17473234                       | (C/A)       |
| 6339        | CakSNP6339     | <i>Kabuli</i>    | Ca_Kabuli_Chr04              | 17603613                       | (T/C)       |
| 6340        | CakSNP6340     | <i>Kabuli</i>    | Ca_Kabuli_Chr04              | 17603677                       | (G/C)       |
| 6341        | CakSNP6341     | <i>Kabuli</i>    | Ca_Kabuli_Chr04              | 17603689                       | (T/C)       |
| 6342        | CakSNP6342     | <i>Kabuli</i>    | Ca_Kabuli_Chr04              | 17603725                       | (T/C)       |
| 6343        | CakSNP6343     | <i>Kabuli</i>    | Ca_Kabuli_Chr04              | 17609554                       | (A/T)       |
| 6344        | CakSNP6344     | <i>Kabuli</i>    | Ca_Kabuli_Chr04              | 17621035                       | (G/T)       |
| 6345        | CakSNP6345     | <i>Kabuli</i>    | Ca_Kabuli_Chr04              | 17621609                       | (G/A)       |

| <b>S.N.</b> | <b>SNP IDs</b> | <b>Cultivars</b> | <b>Chromosomes/scaffolds</b> | <b>Physical positions (bp)</b> | <b>SNPs</b> |
|-------------|----------------|------------------|------------------------------|--------------------------------|-------------|
| 6346        | CakSNP6346     | <i>Kabuli</i>    | Ca_Kabuli_Chr04              | 17647558                       | (G/A)       |
| 6347        | CakSNP6347     | <i>Kabuli</i>    | Ca_Kabuli_Chr04              | 17652735                       | (T/C)       |
| 6348        | CakSNP6348     | <i>Kabuli</i>    | Ca_Kabuli_Chr04              | 17685058                       | (T/G)       |
| 6349        | CakSNP6349     | <i>Kabuli</i>    | Ca_Kabuli_Chr04              | 17685113                       | (C/A)       |
| 6350        | CakSNP6350     | <i>Kabuli</i>    | Ca_Kabuli_Chr04              | 17718540                       | (C/T)       |
| 6351        | CakSNP6351     | <i>Kabuli</i>    | Ca_Kabuli_Chr04              | 17718536                       | (C/A)       |
| 6352        | CakSNP6352     | <i>Kabuli</i>    | Ca_Kabuli_Chr04              | 17718894                       | (G/A)       |
| 6353        | CakSNP6353     | <i>Kabuli</i>    | Ca_Kabuli_Chr04              | 17718922                       | (T/G)       |
| 6354        | CakSNP6354     | <i>Kabuli</i>    | Ca_Kabuli_Chr04              | 17718997                       | (C/A)       |
| 6355        | CakSNP6355     | <i>Kabuli</i>    | Ca_Kabuli_Chr04              | 17729988                       | (A/C)       |
| 6356        | CakSNP6356     | <i>Kabuli</i>    | Ca_Kabuli_Chr04              | 17748171                       | (A/T)       |
| 6357        | CakSNP6357     | <i>Kabuli</i>    | Ca_Kabuli_Chr04              | 17752013                       | (C/T)       |
| 6358        | CakSNP6358     | <i>Kabuli</i>    | Ca_Kabuli_Chr04              | 17760841                       | (A/G)       |
| 6359        | CakSNP6359     | <i>Kabuli</i>    | Ca_Kabuli_Chr04              | 17760853                       | (T/G)       |
| 6360        | CakSNP6360     | <i>Kabuli</i>    | Ca_Kabuli_Chr04              | 17768507                       | (T/C)       |
| 6361        | CakSNP6361     | <i>Kabuli</i>    | Ca_Kabuli_Chr04              | 17771708                       | (C/G)       |
| 6362        | CakSNP6362     | <i>Kabuli</i>    | Ca_Kabuli_Chr04              | 17784792                       | (T/A)       |
| 6363        | CakSNP6363     | <i>Kabuli</i>    | Ca_Kabuli_Chr04              | 17826472                       | (G/A)       |
| 6364        | CakSNP6364     | <i>Kabuli</i>    | Ca_Kabuli_Chr04              | 17826533                       | (A/C)       |
| 6365        | CakSNP6365     | <i>Kabuli</i>    | Ca_Kabuli_Chr04              | 17826601                       | (T/C)       |
| 6366        | CakSNP6366     | <i>Kabuli</i>    | Ca_Kabuli_Chr04              | 17826580                       | (C/G)       |
| 6367        | CakSNP6367     | <i>Kabuli</i>    | Ca_Kabuli_Chr04              | 17826543                       | (T/C)       |
| 6368        | CakSNP6368     | <i>Kabuli</i>    | Ca_Kabuli_Chr04              | 17843480                       | (G/T)       |
| 6369        | CakSNP6369     | <i>Kabuli</i>    | Ca_Kabuli_Chr04              | 17847737                       | (G/A)       |
| 6370        | CakSNP6370     | <i>Kabuli</i>    | Ca_Kabuli_Chr04              | 17847854                       | (T/C)       |
| 6371        | CakSNP6371     | <i>Kabuli</i>    | Ca_Kabuli_Chr04              | 17856307                       | (T/C)       |
| 6372        | CakSNP6372     | <i>Kabuli</i>    | Ca_Kabuli_Chr04              | 17856311                       | (T/G)       |
| 6373        | CakSNP6373     | <i>Kabuli</i>    | Ca_Kabuli_Chr04              | 17856334                       | (A/G)       |
| 6374        | CakSNP6374     | <i>Kabuli</i>    | Ca_Kabuli_Chr04              | 17857753                       | (C/T)       |
| 6375        | CakSNP6375     | <i>Kabuli</i>    | Ca_Kabuli_Chr04              | 17858122                       | (T/G)       |
| 6376        | CakSNP6376     | <i>Kabuli</i>    | Ca_Kabuli_Chr04              | 17858133                       | (C/T)       |
| 6377        | CakSNP6377     | <i>Kabuli</i>    | Ca_Kabuli_Chr04              | 17858135                       | (G/A)       |
| 6378        | CakSNP6378     | <i>Kabuli</i>    | Ca_Kabuli_Chr04              | 17858140                       | (A/C)       |
| 6379        | CakSNP6379     | <i>Kabuli</i>    | Ca_Kabuli_Chr04              | 17858143                       | (A/T)       |
| 6380        | CakSNP6380     | <i>Kabuli</i>    | Ca_Kabuli_Chr04              | 17858144                       | (G/C)       |
| 6381        | CakSNP6381     | <i>Kabuli</i>    | Ca_Kabuli_Chr04              | 17858152                       | (A/T)       |
| 6382        | CakSNP6382     | <i>Kabuli</i>    | Ca_Kabuli_Chr04              | 17858159                       | (C/A)       |
| 6383        | CakSNP6383     | <i>Kabuli</i>    | Ca_Kabuli_Chr04              | 17858226                       | (C/T)       |

| <b>S.N.</b> | <b>SNP IDs</b> | <b>Cultivars</b> | <b>Chromosomes/scaffolds</b> | <b>Physical positions (bp)</b> | <b>SNPs</b> |
|-------------|----------------|------------------|------------------------------|--------------------------------|-------------|
| 6384        | CakSNP6384     | <i>Kabuli</i>    | Ca_Kabuli_Chr04              | 17871769                       | (C/A)       |
| 6385        | CakSNP6385     | <i>Kabuli</i>    | Ca_Kabuli_Chr04              | 17871763                       | (T/C)       |
| 6386        | CakSNP6386     | <i>Kabuli</i>    | Ca_Kabuli_Chr04              | 17871804                       | (T/C)       |
| 6387        | CakSNP6387     | <i>Kabuli</i>    | Ca_Kabuli_Chr04              | 17871828                       | (A/C)       |
| 6388        | CakSNP6388     | <i>Kabuli</i>    | Ca_Kabuli_Chr04              | 17871919                       | (A/G)       |
| 6389        | CakSNP6389     | <i>Kabuli</i>    | Ca_Kabuli_Chr04              | 17871915                       | (T/A)       |
| 6390        | CakSNP6390     | <i>Kabuli</i>    | Ca_Kabuli_Chr04              | 17913731                       | (A/C)       |
| 6391        | CakSNP6391     | <i>Kabuli</i>    | Ca_Kabuli_Chr04              | 17913726                       | (G/A)       |
| 6392        | CakSNP6392     | <i>Kabuli</i>    | Ca_Kabuli_Chr04              | 17913719                       | (G/C)       |
| 6393        | CakSNP6393     | <i>Kabuli</i>    | Ca_Kabuli_Chr04              | 17913698                       | (C/T)       |
| 6394        | CakSNP6394     | <i>Kabuli</i>    | Ca_Kabuli_Chr04              | 17913682                       | (C/A)       |
| 6395        | CakSNP6395     | <i>Kabuli</i>    | Ca_Kabuli_Chr04              | 17920616                       | (C/G)       |
| 6396        | CakSNP6396     | <i>Kabuli</i>    | Ca_Kabuli_Chr04              | 17931955                       | (G/A)       |
| 6397        | CakSNP6397     | <i>Kabuli</i>    | Ca_Kabuli_Chr04              | 17970218                       | (T/G)       |
| 6398        | CakSNP6398     | <i>Kabuli</i>    | Ca_Kabuli_Chr04              | 17970221                       | (C/T)       |
| 6399        | CakSNP6399     | <i>Kabuli</i>    | Ca_Kabuli_Chr04              | 17970225                       | (T/C)       |
| 6400        | CakSNP6400     | <i>Kabuli</i>    | Ca_Kabuli_Chr04              | 17970232                       | (A/G)       |
| 6401        | CakSNP6401     | <i>Kabuli</i>    | Ca_Kabuli_Chr04              | 17970280                       | (T/A)       |
| 6402        | CakSNP6402     | <i>Kabuli</i>    | Ca_Kabuli_Chr04              | 18053756                       | (A/G)       |
| 6403        | CakSNP6403     | <i>Kabuli</i>    | Ca_Kabuli_Chr04              | 18070293                       | (G/T)       |
| 6404        | CakSNP6404     | <i>Kabuli</i>    | Ca_Kabuli_Chr04              | 18071114                       | (C/A)       |
| 6405        | CakSNP6405     | <i>Kabuli</i>    | Ca_Kabuli_Chr04              | 18071324                       | (G/A)       |
| 6406        | CakSNP6406     | <i>Kabuli</i>    | Ca_Kabuli_Chr04              | 18089423                       | (G/C)       |
| 6407        | CakSNP6407     | <i>Kabuli</i>    | Ca_Kabuli_Chr04              | 18089422                       | (T/C)       |
| 6408        | CakSNP6408     | <i>Kabuli</i>    | Ca_Kabuli_Chr04              | 18117833                       | (T/C)       |
| 6409        | CakSNP6409     | <i>Kabuli</i>    | Ca_Kabuli_Chr04              | 18222762                       | (T/C)       |
| 6410        | CakSNP6410     | <i>Kabuli</i>    | Ca_Kabuli_Chr04              | 18231443                       | (T/C)       |
| 6411        | CakSNP6411     | <i>Kabuli</i>    | Ca_Kabuli_Chr04              | 18231463                       | (T/C)       |
| 6412        | CakSNP6412     | <i>Kabuli</i>    | Ca_Kabuli_Chr04              | 18231466                       | (T/C)       |
| 6413        | CakSNP6413     | <i>Kabuli</i>    | Ca_Kabuli_Chr04              | 18242020                       | (C/G)       |
| 6414        | CakSNP6414     | <i>Kabuli</i>    | Ca_Kabuli_Chr04              | 18241995                       | (C/G)       |
| 6415        | CakSNP6415     | <i>Kabuli</i>    | Ca_Kabuli_Chr04              | 18427385                       | (T/G)       |
| 6416        | CakSNP6416     | <i>Kabuli</i>    | Ca_Kabuli_Chr04              | 18427384                       | (C/T)       |
| 6417        | CakSNP6417     | <i>Kabuli</i>    | Ca_Kabuli_Chr04              | 18429046                       | (G/T)       |
| 6418        | CakSNP6418     | <i>Kabuli</i>    | Ca_Kabuli_Chr04              | 18429139                       | (C/T)       |
| 6419        | CakSNP6419     | <i>Kabuli</i>    | Ca_Kabuli_Chr04              | 18485782                       | (T/C)       |
| 6420        | CakSNP6420     | <i>Kabuli</i>    | Ca_Kabuli_Chr04              | 18489456                       | (G/C)       |
| 6421        | CakSNP6421     | <i>Kabuli</i>    | Ca_Kabuli_Chr04              | 18495186                       | (A/G)       |

| <b>S.N.</b> | <b>SNP IDs</b> | <b>Cultivars</b> | <b>Chromosomes/scaffolds</b> | <b>Physical positions (bp)</b> | <b>SNPs</b> |
|-------------|----------------|------------------|------------------------------|--------------------------------|-------------|
| 6422        | CakSNP6422     | <i>Kabuli</i>    | Ca_Kabuli_Chr04              | 18545489                       | (A/T)       |
| 6423        | CakSNP6423     | <i>Kabuli</i>    | Ca_Kabuli_Chr04              | 18546209                       | (T/G)       |
| 6424        | CakSNP6424     | <i>Kabuli</i>    | Ca_Kabuli_Chr04              | 18625387                       | (G/A)       |
| 6425        | CakSNP6425     | <i>Kabuli</i>    | Ca_Kabuli_Chr04              | 18628582                       | (A/G)       |
| 6426        | CakSNP6426     | <i>Kabuli</i>    | Ca_Kabuli_Chr04              | 18710941                       | (T/G)       |
| 6427        | CakSNP6427     | <i>Kabuli</i>    | Ca_Kabuli_Chr04              | 18719417                       | (A/G)       |
| 6428        | CakSNP6428     | <i>Kabuli</i>    | Ca_Kabuli_Chr04              | 18721801                       | (G/A)       |
| 6429        | CakSNP6429     | <i>Kabuli</i>    | Ca_Kabuli_Chr04              | 18779396                       | (A/C)       |
| 6430        | CakSNP6430     | <i>Kabuli</i>    | Ca_Kabuli_Chr04              | 18812610                       | (T/C)       |
| 6431        | CakSNP6431     | <i>Kabuli</i>    | Ca_Kabuli_Chr04              | 18880757                       | (A/G)       |
| 6432        | CakSNP6432     | <i>Kabuli</i>    | Ca_Kabuli_Chr04              | 18904060                       | (G/A)       |
| 6433        | CakSNP6433     | <i>Kabuli</i>    | Ca_Kabuli_Chr04              | 18912038                       | (G/C)       |
| 6434        | CakSNP6434     | <i>Kabuli</i>    | Ca_Kabuli_Chr04              | 18912137                       | (T/C)       |
| 6435        | CakSNP6435     | <i>Kabuli</i>    | Ca_Kabuli_Chr04              | 18912124                       | (C/A)       |
| 6436        | CakSNP6436     | <i>Kabuli</i>    | Ca_Kabuli_Chr04              | 18912142                       | (A/G)       |
| 6437        | CakSNP6437     | <i>Kabuli</i>    | Ca_Kabuli_Chr04              | 18923641                       | (G/T)       |
| 6438        | CakSNP6438     | <i>Kabuli</i>    | Ca_Kabuli_Chr04              | 18953354                       | (C/A)       |
| 6439        | CakSNP6439     | <i>Kabuli</i>    | Ca_Kabuli_Chr04              | 18953423                       | (A/C)       |
| 6440        | CakSNP6440     | <i>Kabuli</i>    | Ca_Kabuli_Chr04              | 18953511                       | (C/G)       |
| 6441        | CakSNP6441     | <i>Kabuli</i>    | Ca_Kabuli_Chr04              | 18998727                       | (C/T)       |
| 6442        | CakSNP6442     | <i>Kabuli</i>    | Ca_Kabuli_Chr04              | 19005285                       | (T/G)       |
| 6443        | CakSNP6443     | <i>Kabuli</i>    | Ca_Kabuli_Chr04              | 19005416                       | (T/G)       |
| 6444        | CakSNP6444     | <i>Kabuli</i>    | Ca_Kabuli_Chr04              | 19006493                       | (C/T)       |
| 6445        | CakSNP6445     | <i>Kabuli</i>    | Ca_Kabuli_Chr04              | 19024709                       | (C/T)       |
| 6446        | CakSNP6446     | <i>Kabuli</i>    | Ca_Kabuli_Chr04              | 19024699                       | (T/C)       |
| 6447        | CakSNP6447     | <i>Kabuli</i>    | Ca_Kabuli_Chr04              | 19206563                       | (A/G)       |
| 6448        | CakSNP6448     | <i>Kabuli</i>    | Ca_Kabuli_Chr04              | 19206581                       | (C/T)       |
| 6449        | CakSNP6449     | <i>Kabuli</i>    | Ca_Kabuli_Chr04              | 19206611                       | (T/C)       |
| 6450        | CakSNP6450     | <i>Kabuli</i>    | Ca_Kabuli_Chr04              | 19206613                       | (T/G)       |
| 6451        | CakSNP6451     | <i>Kabuli</i>    | Ca_Kabuli_Chr04              | 19206678                       | (A/T)       |
| 6452        | CakSNP6452     | <i>Kabuli</i>    | Ca_Kabuli_Chr04              | 19207121                       | (A/T)       |
| 6453        | CakSNP6453     | <i>Kabuli</i>    | Ca_Kabuli_Chr04              | 19227691                       | (G/C)       |
| 6454        | CakSNP6454     | <i>Kabuli</i>    | Ca_Kabuli_Chr04              | 19263964                       | (G/C)       |
| 6455        | CakSNP6455     | <i>Kabuli</i>    | Ca_Kabuli_Chr04              | 19263967                       | (T/G)       |
| 6456        | CakSNP6456     | <i>Kabuli</i>    | Ca_Kabuli_Chr04              | 19267581                       | (A/G)       |
| 6457        | CakSNP6457     | <i>Kabuli</i>    | Ca_Kabuli_Chr04              | 19481258                       | (A/G)       |
| 6458        | CakSNP6458     | <i>Kabuli</i>    | Ca_Kabuli_Chr04              | 19540632                       | (A/C)       |
| 6459        | CakSNP6459     | <i>Kabuli</i>    | Ca_Kabuli_Chr04              | 19540646                       | (T/G)       |

| <b>S.N.</b> | <b>SNP IDs</b> | <b>Cultivars</b> | <b>Chromosomes/scaffolds</b> | <b>Physical positions (bp)</b> | <b>SNPs</b> |
|-------------|----------------|------------------|------------------------------|--------------------------------|-------------|
| 6460        | CakSNP6460     | <i>Kabuli</i>    | Ca_Kabuli_Chr04              | 19579390                       | (G/T)       |
| 6461        | CakSNP6461     | <i>Kabuli</i>    | Ca_Kabuli_Chr04              | 19579401                       | (C/A)       |
| 6462        | CakSNP6462     | <i>Kabuli</i>    | Ca_Kabuli_Chr04              | 19579423                       | (A/G)       |
| 6463        | CakSNP6463     | <i>Kabuli</i>    | Ca_Kabuli_Chr04              | 19579433                       | (G/A)       |
| 6464        | CakSNP6464     | <i>Kabuli</i>    | Ca_Kabuli_Chr04              | 19579435                       | (A/G)       |
| 6465        | CakSNP6465     | <i>Kabuli</i>    | Ca_Kabuli_Chr04              | 19579436                       | (A/T)       |
| 6466        | CakSNP6466     | <i>Kabuli</i>    | Ca_Kabuli_Chr04              | 19579442                       | (C/A)       |
| 6467        | CakSNP6467     | <i>Kabuli</i>    | Ca_Kabuli_Chr04              | 19649499                       | (A/G)       |
| 6468        | CakSNP6468     | <i>Kabuli</i>    | Ca_Kabuli_Chr04              | 19668499                       | (T/C)       |
| 6469        | CakSNP6469     | <i>Kabuli</i>    | Ca_Kabuli_Chr04              | 19668502                       | (T/G)       |
| 6470        | CakSNP6470     | <i>Kabuli</i>    | Ca_Kabuli_Chr04              | 19668595                       | (T/C)       |
| 6471        | CakSNP6471     | <i>Kabuli</i>    | Ca_Kabuli_Chr04              | 19688016                       | (A/G)       |
| 6472        | CakSNP6472     | <i>Kabuli</i>    | Ca_Kabuli_Chr04              | 19712406                       | (C/T)       |
| 6473        | CakSNP6473     | <i>Kabuli</i>    | Ca_Kabuli_Chr04              | 19713311                       | (T/G)       |
| 6474        | CakSNP6474     | <i>Kabuli</i>    | Ca_Kabuli_Chr04              | 19734940                       | (G/A)       |
| 6475        | CakSNP6475     | <i>Kabuli</i>    | Ca_Kabuli_Chr04              | 19844376                       | (A/G)       |
| 6476        | CakSNP6476     | <i>Kabuli</i>    | Ca_Kabuli_Chr04              | 19869729                       | (G/T)       |
| 6477        | CakSNP6477     | <i>Kabuli</i>    | Ca_Kabuli_Chr04              | 19869722                       | (T/G)       |
| 6478        | CakSNP6478     | <i>Kabuli</i>    | Ca_Kabuli_Chr04              | 20218430                       | (T/G)       |
| 6479        | CakSNP6479     | <i>Kabuli</i>    | Ca_Kabuli_Chr04              | 20308992                       | (C/A)       |
| 6480        | CakSNP6480     | <i>Kabuli</i>    | Ca_Kabuli_Chr04              | 20309151                       | (C/T)       |
| 6481        | CakSNP6481     | <i>Kabuli</i>    | Ca_Kabuli_Chr04              | 20398548                       | (T/G)       |
| 6482        | CakSNP6482     | <i>Kabuli</i>    | Ca_Kabuli_Chr04              | 20398685                       | (A/C)       |
| 6483        | CakSNP6483     | <i>Kabuli</i>    | Ca_Kabuli_Chr04              | 20402361                       | (A/G)       |
| 6484        | CakSNP6484     | <i>Kabuli</i>    | Ca_Kabuli_Chr04              | 20402391                       | (A/G)       |
| 6485        | CakSNP6485     | <i>Kabuli</i>    | Ca_Kabuli_Chr04              | 20412329                       | (A/T)       |
| 6486        | CakSNP6486     | <i>Kabuli</i>    | Ca_Kabuli_Chr04              | 20436136                       | (G/A)       |
| 6487        | CakSNP6487     | <i>Kabuli</i>    | Ca_Kabuli_Chr04              | 20444953                       | (T/C)       |
| 6488        | CakSNP6488     | <i>Kabuli</i>    | Ca_Kabuli_Chr04              | 20599050                       | (A/G)       |
| 6489        | CakSNP6489     | <i>Kabuli</i>    | Ca_Kabuli_Chr04              | 20599058                       | (T/C)       |
| 6490        | CakSNP6490     | <i>Kabuli</i>    | Ca_Kabuli_Chr04              | 20599081                       | (C/T)       |
| 6491        | CakSNP6491     | <i>Kabuli</i>    | Ca_Kabuli_Chr04              | 20599091                       | (T/G)       |
| 6492        | CakSNP6492     | <i>Kabuli</i>    | Ca_Kabuli_Chr04              | 20656170                       | (T/G)       |
| 6493        | CakSNP6493     | <i>Kabuli</i>    | Ca_Kabuli_Chr04              | 20669174                       | (T/C)       |
| 6494        | CakSNP6494     | <i>Kabuli</i>    | Ca_Kabuli_Chr04              | 20669442                       | (G/A)       |
| 6495        | CakSNP6495     | <i>Kabuli</i>    | Ca_Kabuli_Chr04              | 20696913                       | (A/G)       |
| 6496        | CakSNP6496     | <i>Kabuli</i>    | Ca_Kabuli_Chr04              | 20696952                       | (G/T)       |
| 6497        | CakSNP6497     | <i>Kabuli</i>    | Ca_Kabuli_Chr04              | 20696979                       | (C/T)       |

| <b>S.N.</b> | <b>SNP IDs</b> | <b>Cultivars</b> | <b>Chromosomes/scaffolds</b> | <b>Physical positions (bp)</b> | <b>SNPs</b> |
|-------------|----------------|------------------|------------------------------|--------------------------------|-------------|
| 6498        | CakSNP6498     | <i>Kabuli</i>    | Ca_Kabuli_Chr04              | 20697338                       | (T/A)       |
| 6499        | CakSNP6499     | <i>Kabuli</i>    | Ca_Kabuli_Chr04              | 20697408                       | (A/G)       |
| 6500        | CakSNP6500     | <i>Kabuli</i>    | Ca_Kabuli_Chr04              | 20774180                       | (C/T)       |
| 6501        | CakSNP6501     | <i>Kabuli</i>    | Ca_Kabuli_Chr04              | 20905105                       | (G/A)       |
| 6502        | CakSNP6502     | <i>Kabuli</i>    | Ca_Kabuli_Chr04              | 21096178                       | (G/A)       |
| 6503        | CakSNP6503     | <i>Kabuli</i>    | Ca_Kabuli_Chr04              | 21385308                       | (A/T)       |
| 6504        | CakSNP6504     | <i>Kabuli</i>    | Ca_Kabuli_Chr04              | 21830534                       | (C/T)       |
| 6505        | CakSNP6505     | <i>Kabuli</i>    | Ca_Kabuli_Chr04              | 21835459                       | (T/A)       |
| 6506        | CakSNP6506     | <i>Kabuli</i>    | Ca_Kabuli_Chr04              | 21835457                       | (T/A)       |
| 6507        | CakSNP6507     | <i>Kabuli</i>    | Ca_Kabuli_Chr04              | 21835454                       | (C/A)       |
| 6508        | CakSNP6508     | <i>Kabuli</i>    | Ca_Kabuli_Chr04              | 21835446                       | (T/A)       |
| 6509        | CakSNP6509     | <i>Kabuli</i>    | Ca_Kabuli_Chr04              | 21931559                       | (A/G)       |
| 6510        | CakSNP6510     | <i>Kabuli</i>    | Ca_Kabuli_Chr04              | 21931558                       | (G/A)       |
| 6511        | CakSNP6511     | <i>Kabuli</i>    | Ca_Kabuli_Chr04              | 21931541                       | (C/T)       |
| 6512        | CakSNP6512     | <i>Kabuli</i>    | Ca_Kabuli_Chr04              | 22079566                       | (G/A)       |
| 6513        | CakSNP6513     | <i>Kabuli</i>    | Ca_Kabuli_Chr04              | 22237989                       | (A/T)       |
| 6514        | CakSNP6514     | <i>Kabuli</i>    | Ca_Kabuli_Chr04              | 22237971                       | (C/T)       |
| 6515        | CakSNP6515     | <i>Kabuli</i>    | Ca_Kabuli_Chr04              | 22288433                       | (T/C)       |
| 6516        | CakSNP6516     | <i>Kabuli</i>    | Ca_Kabuli_Chr04              | 22293495                       | (T/C)       |
| 6517        | CakSNP6517     | <i>Kabuli</i>    | Ca_Kabuli_Chr04              | 22850596                       | (C/G)       |
| 6518        | CakSNP6518     | <i>Kabuli</i>    | Ca_Kabuli_Chr04              | 22859422                       | (G/A)       |
| 6519        | CakSNP6519     | <i>Kabuli</i>    | Ca_Kabuli_Chr04              | 22860281                       | (A/C)       |
| 6520        | CakSNP6520     | <i>Kabuli</i>    | Ca_Kabuli_Chr04              | 22865436                       | (A/T)       |
| 6521        | CakSNP6521     | <i>Kabuli</i>    | Ca_Kabuli_Chr04              | 22865390                       | (G/A)       |
| 6522        | CakSNP6522     | <i>Kabuli</i>    | Ca_Kabuli_Chr04              | 22865389                       | (C/T)       |
| 6523        | CakSNP6523     | <i>Kabuli</i>    | Ca_Kabuli_Chr04              | 22908360                       | (A/G)       |
| 6524        | CakSNP6524     | <i>Kabuli</i>    | Ca_Kabuli_Chr04              | 22971660                       | (G/A)       |
| 6525        | CakSNP6525     | <i>Kabuli</i>    | Ca_Kabuli_Chr04              | 22971766                       | (A/G)       |
| 6526        | CakSNP6526     | <i>Kabuli</i>    | Ca_Kabuli_Chr04              | 22971746                       | (G/A)       |
| 6527        | CakSNP6527     | <i>Kabuli</i>    | Ca_Kabuli_Chr04              | 22971744                       | (A/C)       |
| 6528        | CakSNP6528     | <i>Kabuli</i>    | Ca_Kabuli_Chr04              | 22971847                       | (C/A)       |
| 6529        | CakSNP6529     | <i>Kabuli</i>    | Ca_Kabuli_Chr04              | 22971853                       | (C/A)       |
| 6530        | CakSNP6530     | <i>Kabuli</i>    | Ca_Kabuli_Chr04              | 22971884                       | (G/A)       |
| 6531        | CakSNP6531     | <i>Kabuli</i>    | Ca_Kabuli_Chr04              | 23157656                       | (C/G)       |
| 6532        | CakSNP6532     | <i>Kabuli</i>    | Ca_Kabuli_Chr04              | 23267842                       | (T/C)       |
| 6533        | CakSNP6533     | <i>Kabuli</i>    | Ca_Kabuli_Chr04              | 23267856                       | (C/T)       |
| 6534        | CakSNP6534     | <i>Kabuli</i>    | Ca_Kabuli_Chr04              | 23267858                       | (C/T)       |
| 6535        | CakSNP6535     | <i>Kabuli</i>    | Ca_Kabuli_Chr04              | 23267859                       | (T/C)       |

| <b>S.N.</b> | <b>SNP IDs</b> | <b>Cultivars</b> | <b>Chromosomes/scaffolds</b> | <b>Physical positions (bp)</b> | <b>SNPs</b> |
|-------------|----------------|------------------|------------------------------|--------------------------------|-------------|
| 6536        | CakSNP6536     | <i>Kabuli</i>    | Ca_Kabuli_Chr04              | 23314624                       | (C/T)       |
| 6537        | CakSNP6537     | <i>Kabuli</i>    | Ca_Kabuli_Chr04              | 23314665                       | (A/C)       |
| 6538        | CakSNP6538     | <i>Kabuli</i>    | Ca_Kabuli_Chr04              | 23318875                       | (T/C)       |
| 6539        | CakSNP6539     | <i>Kabuli</i>    | Ca_Kabuli_Chr04              | 23319309                       | (G/C)       |
| 6540        | CakSNP6540     | <i>Kabuli</i>    | Ca_Kabuli_Chr04              | 23333610                       | (C/T)       |
| 6541        | CakSNP6541     | <i>Kabuli</i>    | Ca_Kabuli_Chr04              | 23333554                       | (T/C)       |
| 6542        | CakSNP6542     | <i>Kabuli</i>    | Ca_Kabuli_Chr04              | 23337341                       | (T/C)       |
| 6543        | CakSNP6543     | <i>Kabuli</i>    | Ca_Kabuli_Chr04              | 23337312                       | (T/G)       |
| 6544        | CakSNP6544     | <i>Kabuli</i>    | Ca_Kabuli_Chr04              | 23481919                       | (G/A)       |
| 6545        | CakSNP6545     | <i>Kabuli</i>    | Ca_Kabuli_Chr04              | 23481927                       | (G/T)       |
| 6546        | CakSNP6546     | <i>Kabuli</i>    | Ca_Kabuli_Chr04              | 23481962                       | (G/A)       |
| 6547        | CakSNP6547     | <i>Kabuli</i>    | Ca_Kabuli_Chr04              | 23482033                       | (A/G)       |
| 6548        | CakSNP6548     | <i>Kabuli</i>    | Ca_Kabuli_Chr04              | 23481998                       | (T/C)       |
| 6549        | CakSNP6549     | <i>Kabuli</i>    | Ca_Kabuli_Chr04              | 23486812                       | (A/G)       |
| 6550        | CakSNP6550     | <i>Kabuli</i>    | Ca_Kabuli_Chr04              | 23486859                       | (A/G)       |
| 6551        | CakSNP6551     | <i>Kabuli</i>    | Ca_Kabuli_Chr04              | 23486824                       | (T/C)       |
| 6552        | CakSNP6552     | <i>Kabuli</i>    | Ca_Kabuli_Chr04              | 23671441                       | (T/G)       |
| 6553        | CakSNP6553     | <i>Kabuli</i>    | Ca_Kabuli_Chr04              | 23671443                       | (A/T)       |
| 6554        | CakSNP6554     | <i>Kabuli</i>    | Ca_Kabuli_Chr04              | 23731572                       | (C/T)       |
| 6555        | CakSNP6555     | <i>Kabuli</i>    | Ca_Kabuli_Chr04              | 23732099                       | (A/T)       |
| 6556        | CakSNP6556     | <i>Kabuli</i>    | Ca_Kabuli_Chr04              | 24050459                       | (G/A)       |
| 6557        | CakSNP6557     | <i>Kabuli</i>    | Ca_Kabuli_Chr04              | 24050464                       | (G/A)       |
| 6558        | CakSNP6558     | <i>Kabuli</i>    | Ca_Kabuli_Chr04              | 24120866                       | (A/G)       |
| 6559        | CakSNP6559     | <i>Kabuli</i>    | Ca_Kabuli_Chr04              | 24544345                       | (G/A)       |
| 6560        | CakSNP6560     | <i>Kabuli</i>    | Ca_Kabuli_Chr04              | 24614582                       | (G/T)       |
| 6561        | CakSNP6561     | <i>Kabuli</i>    | Ca_Kabuli_Chr04              | 24729302                       | (T/C)       |
| 6562        | CakSNP6562     | <i>Kabuli</i>    | Ca_Kabuli_Chr04              | 24732991                       | (G/T)       |
| 6563        | CakSNP6563     | <i>Kabuli</i>    | Ca_Kabuli_Chr04              | 24732990                       | (T/C)       |
| 6564        | CakSNP6564     | <i>Kabuli</i>    | Ca_Kabuli_Chr04              | 24771737                       | (T/A)       |
| 6565        | CakSNP6565     | <i>Kabuli</i>    | Ca_Kabuli_Chr04              | 24782714                       | (C/A)       |
| 6566        | CakSNP6566     | <i>Kabuli</i>    | Ca_Kabuli_Chr04              | 24782715                       | (A/G)       |
| 6567        | CakSNP6567     | <i>Kabuli</i>    | Ca_Kabuli_Chr04              | 24856115                       | (A/C)       |
| 6568        | CakSNP6568     | <i>Kabuli</i>    | Ca_Kabuli_Chr04              | 24857501                       | (A/G)       |
| 6569        | CakSNP6569     | <i>Kabuli</i>    | Ca_Kabuli_Chr04              | 25401714                       | (T/C)       |
| 6570        | CakSNP6570     | <i>Kabuli</i>    | Ca_Kabuli_Chr04              | 25446677                       | (G/C)       |
| 6571        | CakSNP6571     | <i>Kabuli</i>    | Ca_Kabuli_Chr04              | 25446684                       | (T/C)       |
| 6572        | CakSNP6572     | <i>Kabuli</i>    | Ca_Kabuli_Chr04              | 25449897                       | (T/G)       |
| 6573        | CakSNP6573     | <i>Kabuli</i>    | Ca_Kabuli_Chr04              | 25455156                       | (G/A)       |

| <b>S.N.</b> | <b>SNP IDs</b> | <b>Cultivars</b> | <b>Chromosomes/scaffolds</b> | <b>Physical positions (bp)</b> | <b>SNPs</b> |
|-------------|----------------|------------------|------------------------------|--------------------------------|-------------|
| 6574        | CakSNP6574     | <i>Kabuli</i>    | Ca_Kabuli_Chr04              | 25455204                       | (A/G)       |
| 6575        | CakSNP6575     | <i>Kabuli</i>    | Ca_Kabuli_Chr04              | 25455225                       | (G/A)       |
| 6576        | CakSNP6576     | <i>Kabuli</i>    | Ca_Kabuli_Chr04              | 25592561                       | (T/C)       |
| 6577        | CakSNP6577     | <i>Kabuli</i>    | Ca_Kabuli_Chr04              | 25592548                       | (A/G)       |
| 6578        | CakSNP6578     | <i>Kabuli</i>    | Ca_Kabuli_Chr04              | 25592528                       | (A/C)       |
| 6579        | CakSNP6579     | <i>Kabuli</i>    | Ca_Kabuli_Chr04              | 25592525                       | (C/A)       |
| 6580        | CakSNP6580     | <i>Kabuli</i>    | Ca_Kabuli_Chr04              | 25592492                       | (T/C)       |
| 6581        | CakSNP6581     | <i>Kabuli</i>    | Ca_Kabuli_Chr04              | 25592487                       | (A/G)       |
| 6582        | CakSNP6582     | <i>Kabuli</i>    | Ca_Kabuli_Chr04              | 25592484                       | (A/C)       |
| 6583        | CakSNP6583     | <i>Kabuli</i>    | Ca_Kabuli_Chr04              | 25592481                       | (T/C)       |
| 6584        | CakSNP6584     | <i>Kabuli</i>    | Ca_Kabuli_Chr04              | 25729905                       | (C/A)       |
| 6585        | CakSNP6585     | <i>Kabuli</i>    | Ca_Kabuli_Chr04              | 25729914                       | (C/A)       |
| 6586        | CakSNP6586     | <i>Kabuli</i>    | Ca_Kabuli_Chr04              | 25729974                       | (G/C)       |
| 6587        | CakSNP6587     | <i>Kabuli</i>    | Ca_Kabuli_Chr04              | 25729977                       | (C/T)       |
| 6588        | CakSNP6588     | <i>Kabuli</i>    | Ca_Kabuli_Chr04              | 25747256                       | (T/C)       |
| 6589        | CakSNP6589     | <i>Kabuli</i>    | Ca_Kabuli_Chr04              | 25747262                       | (G/A)       |
| 6590        | CakSNP6590     | <i>Kabuli</i>    | Ca_Kabuli_Chr04              | 25747274                       | (T/G)       |
| 6591        | CakSNP6591     | <i>Kabuli</i>    | Ca_Kabuli_Chr04              | 25747275                       | (G/A)       |
| 6592        | CakSNP6592     | <i>Kabuli</i>    | Ca_Kabuli_Chr04              | 25747281                       | (T/C)       |
| 6593        | CakSNP6593     | <i>Kabuli</i>    | Ca_Kabuli_Chr04              | 25747295                       | (G/A)       |
| 6594        | CakSNP6594     | <i>Kabuli</i>    | Ca_Kabuli_Chr04              | 25747296                       | (T/C)       |
| 6595        | CakSNP6595     | <i>Kabuli</i>    | Ca_Kabuli_Chr04              | 25747364                       | (T/A)       |
| 6596        | CakSNP6596     | <i>Kabuli</i>    | Ca_Kabuli_Chr04              | 25747297                       | (G/A)       |
| 6597        | CakSNP6597     | <i>Kabuli</i>    | Ca_Kabuli_Chr04              | 25809665                       | (T/C)       |
| 6598        | CakSNP6598     | <i>Kabuli</i>    | Ca_Kabuli_Chr04              | 25921165                       | (T/C)       |
| 6599        | CakSNP6599     | <i>Kabuli</i>    | Ca_Kabuli_Chr04              | 26000532                       | (C/T)       |
| 6600        | CakSNP6600     | <i>Kabuli</i>    | Ca_Kabuli_Chr04              | 26000483                       | (T/A)       |
| 6601        | CakSNP6601     | <i>Kabuli</i>    | Ca_Kabuli_Chr04              | 26002991                       | (C/A)       |
| 6602        | CakSNP6602     | <i>Kabuli</i>    | Ca_Kabuli_Chr04              | 26008744                       | (G/A)       |
| 6603        | CakSNP6603     | <i>Kabuli</i>    | Ca_Kabuli_Chr04              | 26008745                       | (G/A)       |
| 6604        | CakSNP6604     | <i>Kabuli</i>    | Ca_Kabuli_Chr04              | 26008748                       | (C/T)       |
| 6605        | CakSNP6605     | <i>Kabuli</i>    | Ca_Kabuli_Chr04              | 26008768                       | (A/G)       |
| 6606        | CakSNP6606     | <i>Kabuli</i>    | Ca_Kabuli_Chr04              | 26008816                       | (C/A)       |
| 6607        | CakSNP6607     | <i>Kabuli</i>    | Ca_Kabuli_Chr04              | 26009438                       | (G/T)       |
| 6608        | CakSNP6608     | <i>Kabuli</i>    | Ca_Kabuli_Chr04              | 26009439                       | (G/T)       |
| 6609        | CakSNP6609     | <i>Kabuli</i>    | Ca_Kabuli_Chr04              | 26222180                       | (A/G)       |
| 6610        | CakSNP6610     | <i>Kabuli</i>    | Ca_Kabuli_Chr04              | 26282236                       | (A/C)       |
| 6611        | CakSNP6611     | <i>Kabuli</i>    | Ca_Kabuli_Chr04              | 26324460                       | (T/C)       |



| <b>S.N.</b> | <b>SNP IDs</b> | <b>Cultivars</b> | <b>Chromosomes/scaffolds</b> | <b>Physical positions (bp)</b> | <b>SNPs</b> |
|-------------|----------------|------------------|------------------------------|--------------------------------|-------------|
| 6612        | CakSNP6612     | <i>Kabuli</i>    | Ca_Kabuli_Chr04              | 26529606                       | (C/T)       |
| 6613        | CakSNP6613     | <i>Kabuli</i>    | Ca_Kabuli_Chr04              | 26532763                       | (T/G)       |
| 6614        | CakSNP6614     | <i>Kabuli</i>    | Ca_Kabuli_Chr04              | 26536919                       | (C/G)       |
| 6615        | CakSNP6615     | <i>Kabuli</i>    | Ca_Kabuli_Chr04              | 26537053                       | (C/T)       |
| 6616        | CakSNP6616     | <i>Kabuli</i>    | Ca_Kabuli_Chr04              | 26537258                       | (A/C)       |
| 6617        | CakSNP6617     | <i>Kabuli</i>    | Ca_Kabuli_Chr04              | 26869756                       | (A/G)       |
| 6618        | CakSNP6618     | <i>Kabuli</i>    | Ca_Kabuli_Chr04              | 26915602                       | (G/A)       |
| 6619        | CakSNP6619     | <i>Kabuli</i>    | Ca_Kabuli_Chr04              | 26915615                       | (A/G)       |
| 6620        | CakSNP6620     | <i>Kabuli</i>    | Ca_Kabuli_Chr04              | 26915621                       | (G/A)       |
| 6621        | CakSNP6621     | <i>Kabuli</i>    | Ca_Kabuli_Chr04              | 26915626                       | (C/T)       |
| 6622        | CakSNP6622     | <i>Kabuli</i>    | Ca_Kabuli_Chr04              | 26989085                       | (G/A)       |
| 6623        | CakSNP6623     | <i>Kabuli</i>    | Ca_Kabuli_Chr04              | 26989090                       | (G/T)       |
| 6624        | CakSNP6624     | <i>Kabuli</i>    | Ca_Kabuli_Chr04              | 26989204                       | (A/C)       |
| 6625        | CakSNP6625     | <i>Kabuli</i>    | Ca_Kabuli_Chr04              | 27102807                       | (G/A)       |
| 6626        | CakSNP6626     | <i>Kabuli</i>    | Ca_Kabuli_Chr04              | 27102817                       | (A/C)       |
| 6627        | CakSNP6627     | <i>Kabuli</i>    | Ca_Kabuli_Chr04              | 27102833                       | (G/T)       |
| 6628        | CakSNP6628     | <i>Kabuli</i>    | Ca_Kabuli_Chr04              | 27262241                       | (C/T)       |
| 6629        | CakSNP6629     | <i>Kabuli</i>    | Ca_Kabuli_Chr04              | 27262893                       | (G/A)       |
| 6630        | CakSNP6630     | <i>Kabuli</i>    | Ca_Kabuli_Chr04              | 27262870                       | (C/T)       |
| 6631        | CakSNP6631     | <i>Kabuli</i>    | Ca_Kabuli_Chr04              | 27262830                       | (T/A)       |
| 6632        | CakSNP6632     | <i>Kabuli</i>    | Ca_Kabuli_Chr04              | 27268301                       | (G/A)       |
| 6633        | CakSNP6633     | <i>Kabuli</i>    | Ca_Kabuli_Chr04              | 27268278                       | (C/T)       |
| 6634        | CakSNP6634     | <i>Kabuli</i>    | Ca_Kabuli_Chr04              | 27493010                       | (G/T)       |
| 6635        | CakSNP6635     | <i>Kabuli</i>    | Ca_Kabuli_Chr04              | 27613450                       | (C/T)       |
| 6636        | CakSNP6636     | <i>Kabuli</i>    | Ca_Kabuli_Chr04              | 27617803                       | (A/G)       |
| 6637        | CakSNP6637     | <i>Kabuli</i>    | Ca_Kabuli_Chr04              | 27626559                       | (G/A)       |
| 6638        | CakSNP6638     | <i>Kabuli</i>    | Ca_Kabuli_Chr04              | 27626999                       | (C/T)       |
| 6639        | CakSNP6639     | <i>Kabuli</i>    | Ca_Kabuli_Chr04              | 27661241                       | (T/G)       |
| 6640        | CakSNP6640     | <i>Kabuli</i>    | Ca_Kabuli_Chr04              | 27669829                       | (C/G)       |
| 6641        | CakSNP6641     | <i>Kabuli</i>    | Ca_Kabuli_Chr04              | 27777968                       | (A/C)       |
| 6642        | CakSNP6642     | <i>Kabuli</i>    | Ca_Kabuli_Chr04              | 27786162                       | (G/C)       |
| 6643        | CakSNP6643     | <i>Kabuli</i>    | Ca_Kabuli_Chr04              | 27970989                       | (T/G)       |
| 6644        | CakSNP6644     | <i>Kabuli</i>    | Ca_Kabuli_Chr04              | 28061002                       | (A/C)       |
| 6645        | CakSNP6645     | <i>Kabuli</i>    | Ca_Kabuli_Chr04              | 28092609                       | (G/A)       |
| 6646        | CakSNP6646     | <i>Kabuli</i>    | Ca_Kabuli_Chr04              | 28092727                       | (T/A)       |
| 6647        | CakSNP6647     | <i>Kabuli</i>    | Ca_Kabuli_Chr04              | 28092725                       | (T/G)       |
| 6648        | CakSNP6648     | <i>Kabuli</i>    | Ca_Kabuli_Chr04              | 28092724                       | (T/A)       |
| 6649        | CakSNP6649     | <i>Kabuli</i>    | Ca_Kabuli_Chr04              | 28268788                       | (G/A)       |

| <b>S.N.</b> | <b>SNP IDs</b> | <b>Cultivars</b> | <b>Chromosomes/scaffolds</b> | <b>Physical positions (bp)</b> | <b>SNPs</b> |
|-------------|----------------|------------------|------------------------------|--------------------------------|-------------|
| 6650        | CakSNP6650     | <i>Kabuli</i>    | Ca_Kabuli_Chr04              | 28289900                       | (C/A)       |
| 6651        | CakSNP6651     | <i>Kabuli</i>    | Ca_Kabuli_Chr04              | 28299238                       | (G/A)       |
| 6652        | CakSNP6652     | <i>Kabuli</i>    | Ca_Kabuli_Chr04              | 28301853                       | (T/C)       |
| 6653        | CakSNP6653     | <i>Kabuli</i>    | Ca_Kabuli_Chr04              | 28423079                       | (T/C)       |
| 6654        | CakSNP6654     | <i>Kabuli</i>    | Ca_Kabuli_Chr04              | 28423140                       | (A/G)       |
| 6655        | CakSNP6655     | <i>Kabuli</i>    | Ca_Kabuli_Chr04              | 28431706                       | (G/A)       |
| 6656        | CakSNP6656     | <i>Kabuli</i>    | Ca_Kabuli_Chr04              | 28790085                       | (A/G)       |
| 6657        | CakSNP6657     | <i>Kabuli</i>    | Ca_Kabuli_Chr04              | 29582296                       | (C/T)       |
| 6658        | CakSNP6658     | <i>Kabuli</i>    | Ca_Kabuli_Chr04              | 29582289                       | (G/A)       |
| 6659        | CakSNP6659     | <i>Kabuli</i>    | Ca_Kabuli_Chr04              | 29582285                       | (C/A)       |
| 6660        | CakSNP6660     | <i>Kabuli</i>    | Ca_Kabuli_Chr04              | 29582282                       | (C/A)       |
| 6661        | CakSNP6661     | <i>Kabuli</i>    | Ca_Kabuli_Chr04              | 29582273                       | (G/A)       |
| 6662        | CakSNP6662     | <i>Kabuli</i>    | Ca_Kabuli_Chr04              | 29582268                       | (C/G)       |
| 6663        | CakSNP6663     | <i>Kabuli</i>    | Ca_Kabuli_Chr04              | 29582257                       | (G/A)       |
| 6664        | CakSNP6664     | <i>Kabuli</i>    | Ca_Kabuli_Chr04              | 29582255                       | (C/T)       |
| 6665        | CakSNP6665     | <i>Kabuli</i>    | Ca_Kabuli_Chr04              | 29582252                       | (G/A)       |
| 6666        | CakSNP6666     | <i>Kabuli</i>    | Ca_Kabuli_Chr04              | 29582249                       | (C/T)       |
| 6667        | CakSNP6667     | <i>Kabuli</i>    | Ca_Kabuli_Chr04              | 29582235                       | (T/A)       |
| 6668        | CakSNP6668     | <i>Kabuli</i>    | Ca_Kabuli_Chr04              | 29582232                       | (C/T)       |
| 6669        | CakSNP6669     | <i>Kabuli</i>    | Ca_Kabuli_Chr04              | 29582227                       | (G/A)       |
| 6670        | CakSNP6670     | <i>Kabuli</i>    | Ca_Kabuli_Chr04              | 29582219                       | (A/C)       |
| 6671        | CakSNP6671     | <i>Kabuli</i>    | Ca_Kabuli_Chr04              | 29582271                       | (C/T)       |
| 6672        | CakSNP6672     | <i>Kabuli</i>    | Ca_Kabuli_Chr04              | 29582286                       | (T/A)       |
| 6673        | CakSNP6673     | <i>Kabuli</i>    | Ca_Kabuli_Chr04              | 29582294                       | (G/A)       |
| 6674        | CakSNP6674     | <i>Kabuli</i>    | Ca_Kabuli_Chr04              | 29582301                       | (G/T)       |
| 6675        | CakSNP6675     | <i>Kabuli</i>    | Ca_Kabuli_Chr04              | 29671563                       | (G/A)       |
| 6676        | CakSNP6676     | <i>Kabuli</i>    | Ca_Kabuli_Chr04              | 29671606                       | (A/G)       |
| 6677        | CakSNP6677     | <i>Kabuli</i>    | Ca_Kabuli_Chr04              | 29683718                       | (A/T)       |
| 6678        | CakSNP6678     | <i>Kabuli</i>    | Ca_Kabuli_Chr04              | 29923380                       | (G/A)       |
| 6679        | CakSNP6679     | <i>Kabuli</i>    | Ca_Kabuli_Chr04              | 29958122                       | (T/G)       |
| 6680        | CakSNP6680     | <i>Kabuli</i>    | Ca_Kabuli_Chr04              | 29958113                       | (G/A)       |
| 6681        | CakSNP6681     | <i>Kabuli</i>    | Ca_Kabuli_Chr04              | 29972268                       | (T/G)       |
| 6682        | CakSNP6682     | <i>Kabuli</i>    | Ca_Kabuli_Chr04              | 30066903                       | (G/A)       |
| 6683        | CakSNP6683     | <i>Kabuli</i>    | Ca_Kabuli_Chr04              | 30153390                       | (G/A)       |
| 6684        | CakSNP6684     | <i>Kabuli</i>    | Ca_Kabuli_Chr04              | 30153448                       | (T/C)       |
| 6685        | CakSNP6685     | <i>Kabuli</i>    | Ca_Kabuli_Chr04              | 30153505                       | (C/G)       |
| 6686        | CakSNP6686     | <i>Kabuli</i>    | Ca_Kabuli_Chr04              | 30258044                       | (A/T)       |
| 6687        | CakSNP6687     | <i>Kabuli</i>    | Ca_Kabuli_Chr04              | 30258045                       | (A/T)       |

| <b>S.N.</b> | <b>SNP IDs</b> | <b>Cultivars</b> | <b>Chromosomes/scaffolds</b> | <b>Physical positions (bp)</b> | <b>SNPs</b> |
|-------------|----------------|------------------|------------------------------|--------------------------------|-------------|
| 6688        | CakSNP6688     | <i>Kabuli</i>    | Ca_Kabuli_Chr04              | 30258056                       | (A/G)       |
| 6689        | CakSNP6689     | <i>Kabuli</i>    | Ca_Kabuli_Chr04              | 30258484                       | (G/C)       |
| 6690        | CakSNP6690     | <i>Kabuli</i>    | Ca_Kabuli_Chr04              | 30258613                       | (C/A)       |
| 6691        | CakSNP6691     | <i>Kabuli</i>    | Ca_Kabuli_Chr04              | 30258607                       | (C/A)       |
| 6692        | CakSNP6692     | <i>Kabuli</i>    | Ca_Kabuli_Chr04              | 30258604                       | (C/A)       |
| 6693        | CakSNP6693     | <i>Kabuli</i>    | Ca_Kabuli_Chr04              | 30258596                       | (G/C)       |
| 6694        | CakSNP6694     | <i>Kabuli</i>    | Ca_Kabuli_Chr04              | 30258567                       | (C/A)       |
| 6695        | CakSNP6695     | <i>Kabuli</i>    | Ca_Kabuli_Chr04              | 30260485                       | (C/A)       |
| 6696        | CakSNP6696     | <i>Kabuli</i>    | Ca_Kabuli_Chr04              | 30281991                       | (A/G)       |
| 6697        | CakSNP6697     | <i>Kabuli</i>    | Ca_Kabuli_Chr04              | 30301002                       | (T/G)       |
| 6698        | CakSNP6698     | <i>Kabuli</i>    | Ca_Kabuli_Chr04              | 30308719                       | (A/C)       |
| 6699        | CakSNP6699     | <i>Kabuli</i>    | Ca_Kabuli_Chr04              | 30308812                       | (G/A)       |
| 6700        | CakSNP6700     | <i>Kabuli</i>    | Ca_Kabuli_Chr04              | 30308788                       | (T/C)       |
| 6701        | CakSNP6701     | <i>Kabuli</i>    | Ca_Kabuli_Chr04              | 30463063                       | (T/C)       |
| 6702        | CakSNP6702     | <i>Kabuli</i>    | Ca_Kabuli_Chr04              | 30463117                       | (C/A)       |
| 6703        | CakSNP6703     | <i>Kabuli</i>    | Ca_Kabuli_Chr04              | 30599096                       | (C/A)       |
| 6704        | CakSNP6704     | <i>Kabuli</i>    | Ca_Kabuli_Chr04              | 30599188                       | (C/T)       |
| 6705        | CakSNP6705     | <i>Kabuli</i>    | Ca_Kabuli_Chr04              | 30667916                       | (G/A)       |
| 6706        | CakSNP6706     | <i>Kabuli</i>    | Ca_Kabuli_Chr04              | 30668893                       | (A/C)       |
| 6707        | CakSNP6707     | <i>Kabuli</i>    | Ca_Kabuli_Chr04              | 30851027                       | (A/T)       |
| 6708        | CakSNP6708     | <i>Kabuli</i>    | Ca_Kabuli_Chr04              | 30851411                       | (T/G)       |
| 6709        | CakSNP6709     | <i>Kabuli</i>    | Ca_Kabuli_Chr04              | 30851840                       | (A/T)       |
| 6710        | CakSNP6710     | <i>Kabuli</i>    | Ca_Kabuli_Chr04              | 30931586                       | (G/T)       |
| 6711        | CakSNP6711     | <i>Kabuli</i>    | Ca_Kabuli_Chr04              | 31218647                       | (T/C)       |
| 6712        | CakSNP6712     | <i>Kabuli</i>    | Ca_Kabuli_Chr04              | 31221264                       | (T/G)       |
| 6713        | CakSNP6713     | <i>Kabuli</i>    | Ca_Kabuli_Chr04              | 31221253                       | (G/A)       |
| 6714        | CakSNP6714     | <i>Kabuli</i>    | Ca_Kabuli_Chr04              | 31221226                       | (T/A)       |
| 6715        | CakSNP6715     | <i>Kabuli</i>    | Ca_Kabuli_Chr04              | 31224001                       | (G/A)       |
| 6716        | CakSNP6716     | <i>Kabuli</i>    | Ca_Kabuli_Chr04              | 31262596                       | (T/A)       |
| 6717        | CakSNP6717     | <i>Kabuli</i>    | Ca_Kabuli_Chr04              | 31263205                       | (T/A)       |
| 6718        | CakSNP6718     | <i>Kabuli</i>    | Ca_Kabuli_Chr04              | 31594126                       | (A/C)       |
| 6719        | CakSNP6719     | <i>Kabuli</i>    | Ca_Kabuli_Chr04              | 31618949                       | (T/A)       |
| 6720        | CakSNP6720     | <i>Kabuli</i>    | Ca_Kabuli_Chr04              | 31875713                       | (A/G)       |
| 6721        | CakSNP6721     | <i>Kabuli</i>    | Ca_Kabuli_Chr04              | 31987890                       | (A/C)       |
| 6722        | CakSNP6722     | <i>Kabuli</i>    | Ca_Kabuli_Chr04              | 32042488                       | (T/G)       |
| 6723        | CakSNP6723     | <i>Kabuli</i>    | Ca_Kabuli_Chr04              | 32042527                       | (C/T)       |
| 6724        | CakSNP6724     | <i>Kabuli</i>    | Ca_Kabuli_Chr04              | 32068961                       | (A/G)       |
| 6725        | CakSNP6725     | <i>Kabuli</i>    | Ca_Kabuli_Chr04              | 32073552                       | (T/C)       |

| <b>S.N.</b> | <b>SNP IDs</b> | <b>Cultivars</b> | <b>Chromosomes/scaffolds</b> | <b>Physical positions (bp)</b> | <b>SNPs</b> |
|-------------|----------------|------------------|------------------------------|--------------------------------|-------------|
| 6726        | CakSNP6726     | <i>Kabuli</i>    | Ca_Kabuli_Chr04              | 32073550                       | (C/G)       |
| 6727        | CakSNP6727     | <i>Kabuli</i>    | Ca_Kabuli_Chr04              | 32073549                       | (G/C)       |
| 6728        | CakSNP6728     | <i>Kabuli</i>    | Ca_Kabuli_Chr04              | 32166559                       | (C/G)       |
| 6729        | CakSNP6729     | <i>Kabuli</i>    | Ca_Kabuli_Chr04              | 32166557                       | (T/A)       |
| 6730        | CakSNP6730     | <i>Kabuli</i>    | Ca_Kabuli_Chr04              | 32183307                       | (C/G)       |
| 6731        | CakSNP6731     | <i>Kabuli</i>    | Ca_Kabuli_Chr04              | 32184628                       | (A/G)       |
| 6732        | CakSNP6732     | <i>Kabuli</i>    | Ca_Kabuli_Chr04              | 32212899                       | (G/A)       |
| 6733        | CakSNP6733     | <i>Kabuli</i>    | Ca_Kabuli_Chr04              | 32297780                       | (C/A)       |
| 6734        | CakSNP6734     | <i>Kabuli</i>    | Ca_Kabuli_Chr04              | 32297758                       | (G/A)       |
| 6735        | CakSNP6735     | <i>Kabuli</i>    | Ca_Kabuli_Chr04              | 32297734                       | (A/G)       |
| 6736        | CakSNP6736     | <i>Kabuli</i>    | Ca_Kabuli_Chr04              | 32303394                       | (C/T)       |
| 6737        | CakSNP6737     | <i>Kabuli</i>    | Ca_Kabuli_Chr04              | 32429228                       | (A/T)       |
| 6738        | CakSNP6738     | <i>Kabuli</i>    | Ca_Kabuli_Chr04              | 32429222                       | (A/C)       |
| 6739        | CakSNP6739     | <i>Kabuli</i>    | Ca_Kabuli_Chr04              | 32521346                       | (T/C)       |
| 6740        | CakSNP6740     | <i>Kabuli</i>    | Ca_Kabuli_Chr04              | 32602658                       | (C/T)       |
| 6741        | CakSNP6741     | <i>Kabuli</i>    | Ca_Kabuli_Chr04              | 32604261                       | (G/A)       |
| 6742        | CakSNP6742     | <i>Kabuli</i>    | Ca_Kabuli_Chr04              | 32604538                       | (T/C)       |
| 6743        | CakSNP6743     | <i>Kabuli</i>    | Ca_Kabuli_Chr04              | 32604510                       | (A/C)       |
| 6744        | CakSNP6744     | <i>Kabuli</i>    | Ca_Kabuli_Chr04              | 32636315                       | (T/C)       |
| 6745        | CakSNP6745     | <i>Kabuli</i>    | Ca_Kabuli_Chr04              | 32636276                       | (T/C)       |
| 6746        | CakSNP6746     | <i>Kabuli</i>    | Ca_Kabuli_Chr04              | 32636428                       | (C/A)       |
| 6747        | CakSNP6747     | <i>Kabuli</i>    | Ca_Kabuli_Chr04              | 32636459                       | (A/G)       |
| 6748        | CakSNP6748     | <i>Kabuli</i>    | Ca_Kabuli_Chr04              | 32636690                       | (C/T)       |
| 6749        | CakSNP6749     | <i>Kabuli</i>    | Ca_Kabuli_Chr04              | 32636953                       | (A/G)       |
| 6750        | CakSNP6750     | <i>Kabuli</i>    | Ca_Kabuli_Chr04              | 32639121                       | (C/T)       |
| 6751        | CakSNP6751     | <i>Kabuli</i>    | Ca_Kabuli_Chr04              | 32639188                       | (C/G)       |
| 6752        | CakSNP6752     | <i>Kabuli</i>    | Ca_Kabuli_Chr04              | 32639118                       | (A/C)       |
| 6753        | CakSNP6753     | <i>Kabuli</i>    | Ca_Kabuli_Chr04              | 32639262                       | (A/G)       |
| 6754        | CakSNP6754     | <i>Kabuli</i>    | Ca_Kabuli_Chr04              | 32639315                       | (A/G)       |
| 6755        | CakSNP6755     | <i>Kabuli</i>    | Ca_Kabuli_Chr04              | 32639654                       | (T/C)       |
| 6756        | CakSNP6756     | <i>Kabuli</i>    | Ca_Kabuli_Chr04              | 32639681                       | (C/T)       |
| 6757        | CakSNP6757     | <i>Kabuli</i>    | Ca_Kabuli_Chr04              | 32639770                       | (C/G)       |
| 6758        | CakSNP6758     | <i>Kabuli</i>    | Ca_Kabuli_Chr04              | 32640911                       | (A/G)       |
| 6759        | CakSNP6759     | <i>Kabuli</i>    | Ca_Kabuli_Chr04              | 32853834                       | (T/C)       |
| 6760        | CakSNP6760     | <i>Kabuli</i>    | Ca_Kabuli_Chr04              | 32853838                       | (G/T)       |
| 6761        | CakSNP6761     | <i>Kabuli</i>    | Ca_Kabuli_Chr04              | 33068276                       | (G/A)       |
| 6762        | CakSNP6762     | <i>Kabuli</i>    | Ca_Kabuli_Chr04              | 33221361                       | (T/C)       |
| 6763        | CakSNP6763     | <i>Kabuli</i>    | Ca_Kabuli_Chr04              | 33221371                       | (T/C)       |

| <b>S.N.</b> | <b>SNP IDs</b> | <b>Cultivars</b> | <b>Chromosomes/scaffolds</b> | <b>Physical positions (bp)</b> | <b>SNPs</b> |
|-------------|----------------|------------------|------------------------------|--------------------------------|-------------|
| 6764        | CakSNP6764     | <i>Kabuli</i>    | Ca_Kabuli_Chr04              | 33221397                       | (T/G)       |
| 6765        | CakSNP6765     | <i>Kabuli</i>    | Ca_Kabuli_Chr04              | 33509759                       | (A/C)       |
| 6766        | CakSNP6766     | <i>Kabuli</i>    | Ca_Kabuli_Chr04              | 33509762                       | (G/A)       |
| 6767        | CakSNP6767     | <i>Kabuli</i>    | Ca_Kabuli_Chr04              | 33509804                       | (A/G)       |
| 6768        | CakSNP6768     | <i>Kabuli</i>    | Ca_Kabuli_Chr04              | 33641757                       | (C/T)       |
| 6769        | CakSNP6769     | <i>Kabuli</i>    | Ca_Kabuli_Chr04              | 33820657                       | (A/C)       |
| 6770        | CakSNP6770     | <i>Kabuli</i>    | Ca_Kabuli_Chr04              | 33874346                       | (T/C)       |
| 6771        | CakSNP6771     | <i>Kabuli</i>    | Ca_Kabuli_Chr04              | 33874327                       | (T/C)       |
| 6772        | CakSNP6772     | <i>Kabuli</i>    | Ca_Kabuli_Chr04              | 33874313                       | (G/A)       |
| 6773        | CakSNP6773     | <i>Kabuli</i>    | Ca_Kabuli_Chr04              | 33929598                       | (A/C)       |
| 6774        | CakSNP6774     | <i>Kabuli</i>    | Ca_Kabuli_Chr04              | 33929777                       | (C/T)       |
| 6775        | CakSNP6775     | <i>Kabuli</i>    | Ca_Kabuli_Chr04              | 34032176                       | (C/T)       |
| 6776        | CakSNP6776     | <i>Kabuli</i>    | Ca_Kabuli_Chr04              | 34155135                       | (A/C)       |
| 6777        | CakSNP6777     | <i>Kabuli</i>    | Ca_Kabuli_Chr04              | 34155131                       | (T/A)       |
| 6778        | CakSNP6778     | <i>Kabuli</i>    | Ca_Kabuli_Chr04              | 34155128                       | (C/T)       |
| 6779        | CakSNP6779     | <i>Kabuli</i>    | Ca_Kabuli_Chr04              | 34155127                       | (G/A)       |
| 6780        | CakSNP6780     | <i>Kabuli</i>    | Ca_Kabuli_Chr04              | 34155124                       | (G/A)       |
| 6781        | CakSNP6781     | <i>Kabuli</i>    | Ca_Kabuli_Chr04              | 34155084                       | (C/G)       |
| 6782        | CakSNP6782     | <i>Kabuli</i>    | Ca_Kabuli_Chr04              | 34155083                       | (C/T)       |
| 6783        | CakSNP6783     | <i>Kabuli</i>    | Ca_Kabuli_Chr04              | 34222792                       | (G/C)       |
| 6784        | CakSNP6784     | <i>Kabuli</i>    | Ca_Kabuli_Chr04              | 34354519                       | (G/T)       |
| 6785        | CakSNP6785     | <i>Kabuli</i>    | Ca_Kabuli_Chr04              | 34487064                       | (T/G)       |
| 6786        | CakSNP6786     | <i>Kabuli</i>    | Ca_Kabuli_Chr04              | 34744344                       | (T/G)       |
| 6787        | CakSNP6787     | <i>Kabuli</i>    | Ca_Kabuli_Chr04              | 34744398                       | (T/A)       |
| 6788        | CakSNP6788     | <i>Kabuli</i>    | Ca_Kabuli_Chr04              | 34784285                       | (G/A)       |
| 6789        | CakSNP6789     | <i>Kabuli</i>    | Ca_Kabuli_Chr04              | 34798597                       | (C/A)       |
| 6790        | CakSNP6790     | <i>Kabuli</i>    | Ca_Kabuli_Chr04              | 34916032                       | (C/T)       |
| 6791        | CakSNP6791     | <i>Kabuli</i>    | Ca_Kabuli_Chr04              | 34924575                       | (C/T)       |
| 6792        | CakSNP6792     | <i>Kabuli</i>    | Ca_Kabuli_Chr04              | 34955953                       | (A/G)       |
| 6793        | CakSNP6793     | <i>Kabuli</i>    | Ca_Kabuli_Chr04              | 34955971                       | (A/T)       |
| 6794        | CakSNP6794     | <i>Kabuli</i>    | Ca_Kabuli_Chr04              | 34956006                       | (C/T)       |
| 6795        | CakSNP6795     | <i>Kabuli</i>    | Ca_Kabuli_Chr04              | 34956019                       | (G/A)       |
| 6796        | CakSNP6796     | <i>Kabuli</i>    | Ca_Kabuli_Chr04              | 34956035                       | (C/T)       |
| 6797        | CakSNP6797     | <i>Kabuli</i>    | Ca_Kabuli_Chr04              | 34956111                       | (G/T)       |
| 6798        | CakSNP6798     | <i>Kabuli</i>    | Ca_Kabuli_Chr04              | 34956031                       | (G/A)       |
| 6799        | CakSNP6799     | <i>Kabuli</i>    | Ca_Kabuli_Chr04              | 35141281                       | (A/T)       |
| 6800        | CakSNP6800     | <i>Kabuli</i>    | Ca_Kabuli_Chr04              | 35141309                       | (A/C)       |
| 6801        | CakSNP6801     | <i>Kabuli</i>    | Ca_Kabuli_Chr04              | 35141340                       | (G/A)       |

| <b>S.N.</b> | <b>SNP IDs</b> | <b>Cultivars</b> | <b>Chromosomes/scaffolds</b> | <b>Physical positions (bp)</b> | <b>SNPs</b> |
|-------------|----------------|------------------|------------------------------|--------------------------------|-------------|
| 6802        | CakSNP6802     | <i>Kabuli</i>    | Ca_Kabuli_Chr04              | 35141353                       | (C/G)       |
| 6803        | CakSNP6803     | <i>Kabuli</i>    | Ca_Kabuli_Chr04              | 35141359                       | (C/G)       |
| 6804        | CakSNP6804     | <i>Kabuli</i>    | Ca_Kabuli_Chr04              | 35141375                       | (A/G)       |
| 6805        | CakSNP6805     | <i>Kabuli</i>    | Ca_Kabuli_Chr04              | 35141403                       | (C/T)       |
| 6806        | CakSNP6806     | <i>Kabuli</i>    | Ca_Kabuli_Chr04              | 35141425                       | (A/T)       |
| 6807        | CakSNP6807     | <i>Kabuli</i>    | Ca_Kabuli_Chr04              | 35141421                       | (T/A)       |
| 6808        | CakSNP6808     | <i>Kabuli</i>    | Ca_Kabuli_Chr04              | 35141408                       | (A/G)       |
| 6809        | CakSNP6809     | <i>Kabuli</i>    | Ca_Kabuli_Chr04              | 35168915                       | (C/T)       |
| 6810        | CakSNP6810     | <i>Kabuli</i>    | Ca_Kabuli_Chr04              | 35168939                       | (C/T)       |
| 6811        | CakSNP6811     | <i>Kabuli</i>    | Ca_Kabuli_Chr04              | 35229966                       | (C/T)       |
| 6812        | CakSNP6812     | <i>Kabuli</i>    | Ca_Kabuli_Chr04              | 35230144                       | (A/G)       |
| 6813        | CakSNP6813     | <i>Kabuli</i>    | Ca_Kabuli_Chr04              | 35231891                       | (C/T)       |
| 6814        | CakSNP6814     | <i>Kabuli</i>    | Ca_Kabuli_Chr04              | 35304102                       | (C/T)       |
| 6815        | CakSNP6815     | <i>Kabuli</i>    | Ca_Kabuli_Chr04              | 35304108                       | (C/A)       |
| 6816        | CakSNP6816     | <i>Kabuli</i>    | Ca_Kabuli_Chr04              | 35309709                       | (A/G)       |
| 6817        | CakSNP6817     | <i>Kabuli</i>    | Ca_Kabuli_Chr04              | 35311815                       | (A/C)       |
| 6818        | CakSNP6818     | <i>Kabuli</i>    | Ca_Kabuli_Chr04              | 35337282                       | (A/G)       |
| 6819        | CakSNP6819     | <i>Kabuli</i>    | Ca_Kabuli_Chr04              | 35344356                       | (A/G)       |
| 6820        | CakSNP6820     | <i>Kabuli</i>    | Ca_Kabuli_Chr04              | 35344353                       | (T/C)       |
| 6821        | CakSNP6821     | <i>Kabuli</i>    | Ca_Kabuli_Chr04              | 35344323                       | (C/T)       |
| 6822        | CakSNP6822     | <i>Kabuli</i>    | Ca_Kabuli_Chr04              | 35346415                       | (G/A)       |
| 6823        | CakSNP6823     | <i>Kabuli</i>    | Ca_Kabuli_Chr04              | 35346417                       | (C/T)       |
| 6824        | CakSNP6824     | <i>Kabuli</i>    | Ca_Kabuli_Chr04              | 35346495                       | (C/T)       |
| 6825        | CakSNP6825     | <i>Kabuli</i>    | Ca_Kabuli_Chr04              | 35346465                       | (G/T)       |
| 6826        | CakSNP6826     | <i>Kabuli</i>    | Ca_Kabuli_Chr04              | 35346558                       | (G/T)       |
| 6827        | CakSNP6827     | <i>Kabuli</i>    | Ca_Kabuli_Chr04              | 35346563                       | (G/T)       |
| 6828        | CakSNP6828     | <i>Kabuli</i>    | Ca_Kabuli_Chr04              | 35346573                       | (A/G)       |
| 6829        | CakSNP6829     | <i>Kabuli</i>    | Ca_Kabuli_Chr04              | 35346576                       | (C/G)       |
| 6830        | CakSNP6830     | <i>Kabuli</i>    | Ca_Kabuli_Chr04              | 35346624                       | (G/A)       |
| 6831        | CakSNP6831     | <i>Kabuli</i>    | Ca_Kabuli_Chr04              | 35393505                       | (G/T)       |
| 6832        | CakSNP6832     | <i>Kabuli</i>    | Ca_Kabuli_Chr04              | 35393643                       | (G/A)       |
| 6833        | CakSNP6833     | <i>Kabuli</i>    | Ca_Kabuli_Chr04              | 35455095                       | (A/C)       |
| 6834        | CakSNP6834     | <i>Kabuli</i>    | Ca_Kabuli_Chr04              | 35455062                       | (A/T)       |
| 6835        | CakSNP6835     | <i>Kabuli</i>    | Ca_Kabuli_Chr04              | 35455708                       | (G/A)       |
| 6836        | CakSNP6836     | <i>Kabuli</i>    | Ca_Kabuli_Chr04              | 35469308                       | (T/G)       |
| 6837        | CakSNP6837     | <i>Kabuli</i>    | Ca_Kabuli_Chr04              | 35469304                       | (G/A)       |
| 6838        | CakSNP6838     | <i>Kabuli</i>    | Ca_Kabuli_Chr04              | 35487504                       | (G/C)       |
| 6839        | CakSNP6839     | <i>Kabuli</i>    | Ca_Kabuli_Chr04              | 35487496                       | (C/A)       |

| <b>S.N.</b> | <b>SNP IDs</b> | <b>Cultivars</b> | <b>Chromosomes/scaffolds</b> | <b>Physical positions (bp)</b> | <b>SNPs</b> |
|-------------|----------------|------------------|------------------------------|--------------------------------|-------------|
| 6840        | CakSNP6840     | <i>Kabuli</i>    | Ca_Kabuli_Chr04              | 35487471                       | (A/C)       |
| 6841        | CakSNP6841     | <i>Kabuli</i>    | Ca_Kabuli_Chr04              | 35528758                       | (C/A)       |
| 6842        | CakSNP6842     | <i>Kabuli</i>    | Ca_Kabuli_Chr04              | 35534777                       | (G/C)       |
| 6843        | CakSNP6843     | <i>Kabuli</i>    | Ca_Kabuli_Chr04              | 35534877                       | (T/C)       |
| 6844        | CakSNP6844     | <i>Kabuli</i>    | Ca_Kabuli_Chr04              | 35534891                       | (C/T)       |
| 6845        | CakSNP6845     | <i>Kabuli</i>    | Ca_Kabuli_Chr04              | 35574379                       | (C/A)       |
| 6846        | CakSNP6846     | <i>Kabuli</i>    | Ca_Kabuli_Chr04              | 35634712                       | (A/G)       |
| 6847        | CakSNP6847     | <i>Kabuli</i>    | Ca_Kabuli_Chr04              | 35634751                       | (A/G)       |
| 6848        | CakSNP6848     | <i>Kabuli</i>    | Ca_Kabuli_Chr04              | 35634873                       | (G/T)       |
| 6849        | CakSNP6849     | <i>Kabuli</i>    | Ca_Kabuli_Chr04              | 35961593                       | (A/C)       |
| 6850        | CakSNP6850     | <i>Kabuli</i>    | Ca_Kabuli_Chr04              | 35977422                       | (G/A)       |
| 6851        | CakSNP6851     | <i>Kabuli</i>    | Ca_Kabuli_Chr04              | 36005847                       | (T/G)       |
| 6852        | CakSNP6852     | <i>Kabuli</i>    | Ca_Kabuli_Chr04              | 36010756                       | (T/G)       |
| 6853        | CakSNP6853     | <i>Kabuli</i>    | Ca_Kabuli_Chr04              | 36153818                       | (A/G)       |
| 6854        | CakSNP6854     | <i>Kabuli</i>    | Ca_Kabuli_Chr04              | 36154771                       | (T/C)       |
| 6855        | CakSNP6855     | <i>Kabuli</i>    | Ca_Kabuli_Chr04              | 36154820                       | (G/A)       |
| 6856        | CakSNP6856     | <i>Kabuli</i>    | Ca_Kabuli_Chr04              | 36154822                       | (T/G)       |
| 6857        | CakSNP6857     | <i>Kabuli</i>    | Ca_Kabuli_Chr04              | 36184969                       | (A/G)       |
| 6858        | CakSNP6858     | <i>Kabuli</i>    | Ca_Kabuli_Chr04              | 36277383                       | (C/T)       |
| 6859        | CakSNP6859     | <i>Kabuli</i>    | Ca_Kabuli_Chr04              | 36368713                       | (T/C)       |
| 6860        | CakSNP6860     | <i>Kabuli</i>    | Ca_Kabuli_Chr04              | 36445345                       | (G/A)       |
| 6861        | CakSNP6861     | <i>Kabuli</i>    | Ca_Kabuli_Chr04              | 36445367                       | (A/G)       |
| 6862        | CakSNP6862     | <i>Kabuli</i>    | Ca_Kabuli_Chr04              | 36449101                       | (C/T)       |
| 6863        | CakSNP6863     | <i>Kabuli</i>    | Ca_Kabuli_Chr04              | 36461836                       | (A/G)       |
| 6864        | CakSNP6864     | <i>Kabuli</i>    | Ca_Kabuli_Chr04              | 36467928                       | (C/T)       |
| 6865        | CakSNP6865     | <i>Kabuli</i>    | Ca_Kabuli_Chr04              | 36467943                       | (A/G)       |
| 6866        | CakSNP6866     | <i>Kabuli</i>    | Ca_Kabuli_Chr04              | 36467964                       | (G/A)       |
| 6867        | CakSNP6867     | <i>Kabuli</i>    | Ca_Kabuli_Chr04              | 36467967                       | (T/C)       |
| 6868        | CakSNP6868     | <i>Kabuli</i>    | Ca_Kabuli_Chr04              | 36467980                       | (C/A)       |
| 6869        | CakSNP6869     | <i>Kabuli</i>    | Ca_Kabuli_Chr04              | 36467988                       | (C/T)       |
| 6870        | CakSNP6870     | <i>Kabuli</i>    | Ca_Kabuli_Chr04              | 36467990                       | (T/G)       |
| 6871        | CakSNP6871     | <i>Kabuli</i>    | Ca_Kabuli_Chr04              | 36468003                       | (T/A)       |
| 6872        | CakSNP6872     | <i>Kabuli</i>    | Ca_Kabuli_Chr04              | 36468053                       | (A/G)       |
| 6873        | CakSNP6873     | <i>Kabuli</i>    | Ca_Kabuli_Chr04              | 36488966                       | (A/G)       |
| 6874        | CakSNP6874     | <i>Kabuli</i>    | Ca_Kabuli_Chr04              | 36537118                       | (C/T)       |
| 6875        | CakSNP6875     | <i>Kabuli</i>    | Ca_Kabuli_Chr04              | 36537124                       | (C/T)       |
| 6876        | CakSNP6876     | <i>Kabuli</i>    | Ca_Kabuli_Chr04              | 36537170                       | (C/T)       |
| 6877        | CakSNP6877     | <i>Kabuli</i>    | Ca_Kabuli_Chr04              | 36541088                       | (G/T)       |

| <b>S.N.</b> | <b>SNP IDs</b> | <b>Cultivars</b> | <b>Chromosomes/scaffolds</b> | <b>Physical positions (bp)</b> | <b>SNPs</b> |
|-------------|----------------|------------------|------------------------------|--------------------------------|-------------|
| 6878        | CakSNP6878     | <i>Kabuli</i>    | Ca_Kabuli_Chr04              | 36541087                       | (T/C)       |
| 6879        | CakSNP6879     | <i>Kabuli</i>    | Ca_Kabuli_Chr04              | 36541083                       | (A/C)       |
| 6880        | CakSNP6880     | <i>Kabuli</i>    | Ca_Kabuli_Chr04              | 36639333                       | (A/T)       |
| 6881        | CakSNP6881     | <i>Kabuli</i>    | Ca_Kabuli_Chr04              | 36639382                       | (T/C)       |
| 6882        | CakSNP6882     | <i>Kabuli</i>    | Ca_Kabuli_Chr04              | 36639474                       | (G/C)       |
| 6883        | CakSNP6883     | <i>Kabuli</i>    | Ca_Kabuli_Chr04              | 36673677                       | (C/A)       |
| 6884        | CakSNP6884     | <i>Kabuli</i>    | Ca_Kabuli_Chr04              | 36682215                       | (G/A)       |
| 6885        | CakSNP6885     | <i>Kabuli</i>    | Ca_Kabuli_Chr04              | 36682213                       | (C/T)       |
| 6886        | CakSNP6886     | <i>Kabuli</i>    | Ca_Kabuli_Chr04              | 36682211                       | (G/A)       |
| 6887        | CakSNP6887     | <i>Kabuli</i>    | Ca_Kabuli_Chr04              | 36682253                       | (T/G)       |
| 6888        | CakSNP6888     | <i>Kabuli</i>    | Ca_Kabuli_Chr04              | 36682231                       | (G/T)       |
| 6889        | CakSNP6889     | <i>Kabuli</i>    | Ca_Kabuli_Chr04              | 36709731                       | (G/A)       |
| 6890        | CakSNP6890     | <i>Kabuli</i>    | Ca_Kabuli_Chr04              | 36754121                       | (T/C)       |
| 6891        | CakSNP6891     | <i>Kabuli</i>    | Ca_Kabuli_Chr04              | 36754149                       | (G/A)       |
| 6892        | CakSNP6892     | <i>Kabuli</i>    | Ca_Kabuli_Chr04              | 36754290                       | (T/A)       |
| 6893        | CakSNP6893     | <i>Kabuli</i>    | Ca_Kabuli_Chr04              | 36754378                       | (C/T)       |
| 6894        | CakSNP6894     | <i>Kabuli</i>    | Ca_Kabuli_Chr04              | 36754377                       | (T/A)       |
| 6895        | CakSNP6895     | <i>Kabuli</i>    | Ca_Kabuli_Chr04              | 36754348                       | (C/T)       |
| 6896        | CakSNP6896     | <i>Kabuli</i>    | Ca_Kabuli_Chr04              | 36754343                       | (A/C)       |
| 6897        | CakSNP6897     | <i>Kabuli</i>    | Ca_Kabuli_Chr04              | 36754327                       | (G/A)       |
| 6898        | CakSNP6898     | <i>Kabuli</i>    | Ca_Kabuli_Chr04              | 36754468                       | (G/A)       |
| 6899        | CakSNP6899     | <i>Kabuli</i>    | Ca_Kabuli_Chr04              | 36754453                       | (A/G)       |
| 6900        | CakSNP6900     | <i>Kabuli</i>    | Ca_Kabuli_Chr04              | 36799551                       | (C/T)       |
| 6901        | CakSNP6901     | <i>Kabuli</i>    | Ca_Kabuli_Chr04              | 36831035                       | (A/G)       |
| 6902        | CakSNP6902     | <i>Kabuli</i>    | Ca_Kabuli_Chr04              | 36831199                       | (G/A)       |
| 6903        | CakSNP6903     | <i>Kabuli</i>    | Ca_Kabuli_Chr04              | 36831267                       | (A/C)       |
| 6904        | CakSNP6904     | <i>Kabuli</i>    | Ca_Kabuli_Chr04              | 36955706                       | (G/T)       |
| 6905        | CakSNP6905     | <i>Kabuli</i>    | Ca_Kabuli_Chr04              | 36977192                       | (C/T)       |
| 6906        | CakSNP6906     | <i>Kabuli</i>    | Ca_Kabuli_Chr04              | 36977194                       | (G/A)       |
| 6907        | CakSNP6907     | <i>Kabuli</i>    | Ca_Kabuli_Chr04              | 36979866                       | (T/G)       |
| 6908        | CakSNP6908     | <i>Kabuli</i>    | Ca_Kabuli_Chr04              | 36979926                       | (G/T)       |
| 6909        | CakSNP6909     | <i>Kabuli</i>    | Ca_Kabuli_Chr04              | 36979879                       | (C/T)       |
| 6910        | CakSNP6910     | <i>Kabuli</i>    | Ca_Kabuli_Chr04              | 36982955                       | (A/G)       |
| 6911        | CakSNP6911     | <i>Kabuli</i>    | Ca_Kabuli_Chr04              | 36984727                       | (C/G)       |
| 6912        | CakSNP6912     | <i>Kabuli</i>    | Ca_Kabuli_Chr04              | 36984829                       | (C/T)       |
| 6913        | CakSNP6913     | <i>Kabuli</i>    | Ca_Kabuli_Chr04              | 36984795                       | (T/A)       |
| 6914        | CakSNP6914     | <i>Kabuli</i>    | Ca_Kabuli_Chr04              | 36998201                       | (A/C)       |
| 6915        | CakSNP6915     | <i>Kabuli</i>    | Ca_Kabuli_Chr04              | 36998209                       | (C/T)       |



| <b>S.N.</b> | <b>SNP IDs</b> | <b>Cultivars</b> | <b>Chromosomes/scaffolds</b> | <b>Physical positions (bp)</b> | <b>SNPs</b> |
|-------------|----------------|------------------|------------------------------|--------------------------------|-------------|
| 6916        | CakSNP6916     | <i>Kabuli</i>    | Ca_Kabuli_Chr04              | 37064588                       | (A/G)       |
| 6917        | CakSNP6917     | <i>Kabuli</i>    | Ca_Kabuli_Chr04              | 37064630                       | (G/A)       |
| 6918        | CakSNP6918     | <i>Kabuli</i>    | Ca_Kabuli_Chr04              | 37185576                       | (T/A)       |
| 6919        | CakSNP6919     | <i>Kabuli</i>    | Ca_Kabuli_Chr04              | 37185577                       | (T/A)       |
| 6920        | CakSNP6920     | <i>Kabuli</i>    | Ca_Kabuli_Chr04              | 37185578                       | (T/A)       |
| 6921        | CakSNP6921     | <i>Kabuli</i>    | Ca_Kabuli_Chr04              | 37237211                       | (G/A)       |
| 6922        | CakSNP6922     | <i>Kabuli</i>    | Ca_Kabuli_Chr04              | 37237276                       | (T/C)       |
| 6923        | CakSNP6923     | <i>Kabuli</i>    | Ca_Kabuli_Chr04              | 37241235                       | (A/G)       |
| 6924        | CakSNP6924     | <i>Kabuli</i>    | Ca_Kabuli_Chr04              | 37241262                       | (G/A)       |
| 6925        | CakSNP6925     | <i>Kabuli</i>    | Ca_Kabuli_Chr04              | 37260697                       | (T/C)       |
| 6926        | CakSNP6926     | <i>Kabuli</i>    | Ca_Kabuli_Chr04              | 37260873                       | (A/G)       |
| 6927        | CakSNP6927     | <i>Kabuli</i>    | Ca_Kabuli_Chr04              | 37260841                       | (T/A)       |
| 6928        | CakSNP6928     | <i>Kabuli</i>    | Ca_Kabuli_Chr04              | 37264628                       | (G/A)       |
| 6929        | CakSNP6929     | <i>Kabuli</i>    | Ca_Kabuli_Chr04              | 37286591                       | (T/A)       |
| 6930        | CakSNP6930     | <i>Kabuli</i>    | Ca_Kabuli_Chr04              | 37286625                       | (C/A)       |
| 6931        | CakSNP6931     | <i>Kabuli</i>    | Ca_Kabuli_Chr04              | 37286632                       | (G/A)       |
| 6932        | CakSNP6932     | <i>Kabuli</i>    | Ca_Kabuli_Chr04              | 37286663                       | (A/G)       |
| 6933        | CakSNP6933     | <i>Kabuli</i>    | Ca_Kabuli_Chr04              | 37293752                       | (G/A)       |
| 6934        | CakSNP6934     | <i>Kabuli</i>    | Ca_Kabuli_Chr04              | 37293780                       | (T/A)       |
| 6935        | CakSNP6935     | <i>Kabuli</i>    | Ca_Kabuli_Chr04              | 37293773                       | (A/T)       |
| 6936        | CakSNP6936     | <i>Kabuli</i>    | Ca_Kabuli_Chr04              | 37293769                       | (C/A)       |
| 6937        | CakSNP6937     | <i>Kabuli</i>    | Ca_Kabuli_Chr04              | 37294720                       | (A/G)       |
| 6938        | CakSNP6938     | <i>Kabuli</i>    | Ca_Kabuli_Chr04              | 37316574                       | (T/A)       |
| 6939        | CakSNP6939     | <i>Kabuli</i>    | Ca_Kabuli_Chr04              | 37316748                       | (T/A)       |
| 6940        | CakSNP6940     | <i>Kabuli</i>    | Ca_Kabuli_Chr04              | 37316738                       | (C/T)       |
| 6941        | CakSNP6941     | <i>Kabuli</i>    | Ca_Kabuli_Chr04              | 37316713                       | (A/T)       |
| 6942        | CakSNP6942     | <i>Kabuli</i>    | Ca_Kabuli_Chr04              | 37316700                       | (C/A)       |
| 6943        | CakSNP6943     | <i>Kabuli</i>    | Ca_Kabuli_Chr04              | 37349071                       | (T/C)       |
| 6944        | CakSNP6944     | <i>Kabuli</i>    | Ca_Kabuli_Chr04              | 37349212                       | (A/C)       |
| 6945        | CakSNP6945     | <i>Kabuli</i>    | Ca_Kabuli_Chr04              | 37349239                       | (C/G)       |
| 6946        | CakSNP6946     | <i>Kabuli</i>    | Ca_Kabuli_Chr04              | 37349304                       | (T/C)       |
| 6947        | CakSNP6947     | <i>Kabuli</i>    | Ca_Kabuli_Chr04              | 37349331                       | (C/T)       |
| 6948        | CakSNP6948     | <i>Kabuli</i>    | Ca_Kabuli_Chr04              | 37349321                       | (T/C)       |
| 6949        | CakSNP6949     | <i>Kabuli</i>    | Ca_Kabuli_Chr04              | 37356865                       | (C/A)       |
| 6950        | CakSNP6950     | <i>Kabuli</i>    | Ca_Kabuli_Chr04              | 37356889                       | (C/T)       |
| 6951        | CakSNP6951     | <i>Kabuli</i>    | Ca_Kabuli_Chr04              | 37356892                       | (C/T)       |
| 6952        | CakSNP6952     | <i>Kabuli</i>    | Ca_Kabuli_Chr04              | 37356919                       | (A/T)       |
| 6953        | CakSNP6953     | <i>Kabuli</i>    | Ca_Kabuli_Chr04              | 37356951                       | (C/T)       |

| <b>S.N.</b> | <b>SNP IDs</b> | <b>Cultivars</b> | <b>Chromosomes/scaffolds</b> | <b>Physical positions (bp)</b> | <b>SNPs</b> |
|-------------|----------------|------------------|------------------------------|--------------------------------|-------------|
| 6954        | CakSNP6954     | <i>Kabuli</i>    | Ca_Kabuli_Chr04              | 37364980                       | (G/A)       |
| 6955        | CakSNP6955     | <i>Kabuli</i>    | Ca_Kabuli_Chr04              | 37365020                       | (C/T)       |
| 6956        | CakSNP6956     | <i>Kabuli</i>    | Ca_Kabuli_Chr04              | 37371262                       | (G/A)       |
| 6957        | CakSNP6957     | <i>Kabuli</i>    | Ca_Kabuli_Chr04              | 37371263                       | (G/A)       |
| 6958        | CakSNP6958     | <i>Kabuli</i>    | Ca_Kabuli_Chr04              | 37433459                       | (G/T)       |
| 6959        | CakSNP6959     | <i>Kabuli</i>    | Ca_Kabuli_Chr04              | 37450206                       | (A/C)       |
| 6960        | CakSNP6960     | <i>Kabuli</i>    | Ca_Kabuli_Chr04              | 37450326                       | (A/T)       |
| 6961        | CakSNP6961     | <i>Kabuli</i>    | Ca_Kabuli_Chr04              | 37450308                       | (C/T)       |
| 6962        | CakSNP6962     | <i>Kabuli</i>    | Ca_Kabuli_Chr04              | 37450294                       | (T/C)       |
| 6963        | CakSNP6963     | <i>Kabuli</i>    | Ca_Kabuli_Chr04              | 37453497                       | (C/G)       |
| 6964        | CakSNP6964     | <i>Kabuli</i>    | Ca_Kabuli_Chr04              | 37453449                       | (A/G)       |
| 6965        | CakSNP6965     | <i>Kabuli</i>    | Ca_Kabuli_Chr04              | 37453590                       | (C/A)       |
| 6966        | CakSNP6966     | <i>Kabuli</i>    | Ca_Kabuli_Chr04              | 37453586                       | (C/A)       |
| 6967        | CakSNP6967     | <i>Kabuli</i>    | Ca_Kabuli_Chr04              | 37454296                       | (A/G)       |
| 6968        | CakSNP6968     | <i>Kabuli</i>    | Ca_Kabuli_Chr04              | 37492422                       | (C/A)       |
| 6969        | CakSNP6969     | <i>Kabuli</i>    | Ca_Kabuli_Chr04              | 37549883                       | (T/C)       |
| 6970        | CakSNP6970     | <i>Kabuli</i>    | Ca_Kabuli_Chr04              | 37549871                       | (A/T)       |
| 6971        | CakSNP6971     | <i>Kabuli</i>    | Ca_Kabuli_Chr04              | 37550122                       | (G/A)       |
| 6972        | CakSNP6972     | <i>Kabuli</i>    | Ca_Kabuli_Chr04              | 37552973                       | (C/T)       |
| 6973        | CakSNP6973     | <i>Kabuli</i>    | Ca_Kabuli_Chr04              | 37558880                       | (C/T)       |
| 6974        | CakSNP6974     | <i>Kabuli</i>    | Ca_Kabuli_Chr04              | 37558881                       | (G/T)       |
| 6975        | CakSNP6975     | <i>Kabuli</i>    | Ca_Kabuli_Chr04              | 37575636                       | (T/C)       |
| 6976        | CakSNP6976     | <i>Kabuli</i>    | Ca_Kabuli_Chr04              | 37575670                       | (C/T)       |
| 6977        | CakSNP6977     | <i>Kabuli</i>    | Ca_Kabuli_Chr04              | 37575709                       | (C/T)       |
| 6978        | CakSNP6978     | <i>Kabuli</i>    | Ca_Kabuli_Chr04              | 37612154                       | (A/G)       |
| 6979        | CakSNP6979     | <i>Kabuli</i>    | Ca_Kabuli_Chr04              | 37630404                       | (A/G)       |
| 6980        | CakSNP6980     | <i>Kabuli</i>    | Ca_Kabuli_Chr04              | 37630445                       | (A/G)       |
| 6981        | CakSNP6981     | <i>Kabuli</i>    | Ca_Kabuli_Chr04              | 37630527                       | (G/A)       |
| 6982        | CakSNP6982     | <i>Kabuli</i>    | Ca_Kabuli_Chr04              | 37630520                       | (G/C)       |
| 6983        | CakSNP6983     | <i>Kabuli</i>    | Ca_Kabuli_Chr04              | 37634624                       | (C/T)       |
| 6984        | CakSNP6984     | <i>Kabuli</i>    | Ca_Kabuli_Chr04              | 37635300                       | (T/A)       |
| 6985        | CakSNP6985     | <i>Kabuli</i>    | Ca_Kabuli_Chr04              | 37685824                       | (T/C)       |
| 6986        | CakSNP6986     | <i>Kabuli</i>    | Ca_Kabuli_Chr04              | 37685842                       | (T/G)       |
| 6987        | CakSNP6987     | <i>Kabuli</i>    | Ca_Kabuli_Chr04              | 37699176                       | (G/A)       |
| 6988        | CakSNP6988     | <i>Kabuli</i>    | Ca_Kabuli_Chr04              | 37699141                       | (T/G)       |
| 6989        | CakSNP6989     | <i>Kabuli</i>    | Ca_Kabuli_Chr04              | 37699140                       | (C/T)       |
| 6990        | CakSNP6990     | <i>Kabuli</i>    | Ca_Kabuli_Chr04              | 37703656                       | (G/T)       |
| 6991        | CakSNP6991     | <i>Kabuli</i>    | Ca_Kabuli_Chr04              | 37703653                       | (A/C)       |

| <b>S.N.</b> | <b>SNP IDs</b> | <b>Cultivars</b> | <b>Chromosomes/scaffolds</b> | <b>Physical positions (bp)</b> | <b>SNPs</b> |
|-------------|----------------|------------------|------------------------------|--------------------------------|-------------|
| 6992        | CakSNP6992     | <i>Kabuli</i>    | Ca_Kabuli_Chr04              | 37703651                       | (T/C)       |
| 6993        | CakSNP6993     | <i>Kabuli</i>    | Ca_Kabuli_Chr04              | 37703649                       | (A/C)       |
| 6994        | CakSNP6994     | <i>Kabuli</i>    | Ca_Kabuli_Chr04              | 37703648                       | (C/T)       |
| 6995        | CakSNP6995     | <i>Kabuli</i>    | Ca_Kabuli_Chr04              | 37707115                       | (G/A)       |
| 6996        | CakSNP6996     | <i>Kabuli</i>    | Ca_Kabuli_Chr04              | 37708260                       | (A/G)       |
| 6997        | CakSNP6997     | <i>Kabuli</i>    | Ca_Kabuli_Chr04              | 37708348                       | (T/G)       |
| 6998        | CakSNP6998     | <i>Kabuli</i>    | Ca_Kabuli_Chr04              | 37708334                       | (T/A)       |
| 6999        | CakSNP6999     | <i>Kabuli</i>    | Ca_Kabuli_Chr04              | 37753479                       | (C/T)       |
| 7000        | CakSNP7000     | <i>Kabuli</i>    | Ca_Kabuli_Chr04              | 37806689                       | (T/C)       |
| 7001        | CakSNP7001     | <i>Kabuli</i>    | Ca_Kabuli_Chr04              | 37812917                       | (G/C)       |
| 7002        | CakSNP7002     | <i>Kabuli</i>    | Ca_Kabuli_Chr04              | 37859069                       | (T/G)       |
| 7003        | CakSNP7003     | <i>Kabuli</i>    | Ca_Kabuli_Chr04              | 37897261                       | (G/T)       |
| 7004        | CakSNP7004     | <i>Kabuli</i>    | Ca_Kabuli_Chr04              | 37897266                       | (A/T)       |
| 7005        | CakSNP7005     | <i>Kabuli</i>    | Ca_Kabuli_Chr04              | 37897351                       | (C/A)       |
| 7006        | CakSNP7006     | <i>Kabuli</i>    | Ca_Kabuli_Chr04              | 37898404                       | (A/G)       |
| 7007        | CakSNP7007     | <i>Kabuli</i>    | Ca_Kabuli_Chr04              | 37899597                       | (C/T)       |
| 7008        | CakSNP7008     | <i>Kabuli</i>    | Ca_Kabuli_Chr04              | 37901584                       | (C/T)       |
| 7009        | CakSNP7009     | <i>Kabuli</i>    | Ca_Kabuli_Chr04              | 37901575                       | (G/A)       |
| 7010        | CakSNP7010     | <i>Kabuli</i>    | Ca_Kabuli_Chr04              | 38008062                       | (T/A)       |
| 7011        | CakSNP7011     | <i>Kabuli</i>    | Ca_Kabuli_Chr04              | 38008082                       | (T/C)       |
| 7012        | CakSNP7012     | <i>Kabuli</i>    | Ca_Kabuli_Chr04              | 38008243                       | (C/T)       |
| 7013        | CakSNP7013     | <i>Kabuli</i>    | Ca_Kabuli_Chr04              | 38008227                       | (G/T)       |
| 7014        | CakSNP7014     | <i>Kabuli</i>    | Ca_Kabuli_Chr04              | 38008213                       | (C/T)       |
| 7015        | CakSNP7015     | <i>Kabuli</i>    | Ca_Kabuli_Chr04              | 38008205                       | (A/G)       |
| 7016        | CakSNP7016     | <i>Kabuli</i>    | Ca_Kabuli_Chr04              | 38008204                       | (G/A)       |
| 7017        | CakSNP7017     | <i>Kabuli</i>    | Ca_Kabuli_Chr04              | 38008186                       | (A/C)       |
| 7018        | CakSNP7018     | <i>Kabuli</i>    | Ca_Kabuli_Chr04              | 38008174                       | (A/G)       |
| 7019        | CakSNP7019     | <i>Kabuli</i>    | Ca_Kabuli_Chr04              | 38027560                       | (G/A)       |
| 7020        | CakSNP7020     | <i>Kabuli</i>    | Ca_Kabuli_Chr04              | 38029012                       | (T/C)       |
| 7021        | CakSNP7021     | <i>Kabuli</i>    | Ca_Kabuli_Chr04              | 38029050                       | (G/A)       |
| 7022        | CakSNP7022     | <i>Kabuli</i>    | Ca_Kabuli_Chr04              | 38029136                       | (G/T)       |
| 7023        | CakSNP7023     | <i>Kabuli</i>    | Ca_Kabuli_Chr04              | 38038865                       | (C/T)       |
| 7024        | CakSNP7024     | <i>Kabuli</i>    | Ca_Kabuli_Chr04              | 38038959                       | (A/G)       |
| 7025        | CakSNP7025     | <i>Kabuli</i>    | Ca_Kabuli_Chr04              | 38039037                       | (T/C)       |
| 7026        | CakSNP7026     | <i>Kabuli</i>    | Ca_Kabuli_Chr04              | 38039046                       | (C/T)       |
| 7027        | CakSNP7027     | <i>Kabuli</i>    | Ca_Kabuli_Chr04              | 38039076                       | (A/G)       |
| 7028        | CakSNP7028     | <i>Kabuli</i>    | Ca_Kabuli_Chr04              | 38039088                       | (T/C)       |
| 7029        | CakSNP7029     | <i>Kabuli</i>    | Ca_Kabuli_Chr04              | 38039251                       | (G/C)       |

| <b>S.N.</b> | <b>SNP IDs</b> | <b>Cultivars</b> | <b>Chromosomes/scaffolds</b> | <b>Physical positions (bp)</b> | <b>SNPs</b> |
|-------------|----------------|------------------|------------------------------|--------------------------------|-------------|
| 7030        | CakSNP7030     | <i>Kabuli</i>    | Ca_Kabuli_Chr04              | 38039289                       | (G/A)       |
| 7031        | CakSNP7031     | <i>Kabuli</i>    | Ca_Kabuli_Chr04              | 38039297                       | (C/T)       |
| 7032        | CakSNP7032     | <i>Kabuli</i>    | Ca_Kabuli_Chr04              | 38039313                       | (G/A)       |
| 7033        | CakSNP7033     | <i>Kabuli</i>    | Ca_Kabuli_Chr04              | 38039371                       | (T/C)       |
| 7034        | CakSNP7034     | <i>Kabuli</i>    | Ca_Kabuli_Chr04              | 38153183                       | (C/A)       |
| 7035        | CakSNP7035     | <i>Kabuli</i>    | Ca_Kabuli_Chr04              | 38153195                       | (T/C)       |
| 7036        | CakSNP7036     | <i>Kabuli</i>    | Ca_Kabuli_Chr04              | 38153216                       | (T/C)       |
| 7037        | CakSNP7037     | <i>Kabuli</i>    | Ca_Kabuli_Chr04              | 38153277                       | (A/G)       |
| 7038        | CakSNP7038     | <i>Kabuli</i>    | Ca_Kabuli_Chr04              | 38153275                       | (C/A)       |
| 7039        | CakSNP7039     | <i>Kabuli</i>    | Ca_Kabuli_Chr04              | 38153269                       | (A/C)       |
| 7040        | CakSNP7040     | <i>Kabuli</i>    | Ca_Kabuli_Chr04              | 38179583                       | (A/C)       |
| 7041        | CakSNP7041     | <i>Kabuli</i>    | Ca_Kabuli_Chr04              | 38179614                       | (G/C)       |
| 7042        | CakSNP7042     | <i>Kabuli</i>    | Ca_Kabuli_Chr04              | 38181292                       | (G/A)       |
| 7043        | CakSNP7043     | <i>Kabuli</i>    | Ca_Kabuli_Chr04              | 38195411                       | (T/A)       |
| 7044        | CakSNP7044     | <i>Kabuli</i>    | Ca_Kabuli_Chr04              | 38195438                       | (C/T)       |
| 7045        | CakSNP7045     | <i>Kabuli</i>    | Ca_Kabuli_Chr04              | 38215267                       | (G/A)       |
| 7046        | CakSNP7046     | <i>Kabuli</i>    | Ca_Kabuli_Chr04              | 38221009                       | (A/G)       |
| 7047        | CakSNP7047     | <i>Kabuli</i>    | Ca_Kabuli_Chr04              | 38288823                       | (G/T)       |
| 7048        | CakSNP7048     | <i>Kabuli</i>    | Ca_Kabuli_Chr04              | 38288877                       | (C/G)       |
| 7049        | CakSNP7049     | <i>Kabuli</i>    | Ca_Kabuli_Chr04              | 38289066                       | (G/A)       |
| 7050        | CakSNP7050     | <i>Kabuli</i>    | Ca_Kabuli_Chr04              | 38289052                       | (G/A)       |
| 7051        | CakSNP7051     | <i>Kabuli</i>    | Ca_Kabuli_Chr04              | 38288997                       | (T/A)       |
| 7052        | CakSNP7052     | <i>Kabuli</i>    | Ca_Kabuli_Chr04              | 38343633                       | (A/T)       |
| 7053        | CakSNP7053     | <i>Kabuli</i>    | Ca_Kabuli_Chr04              | 38343750                       | (C/T)       |
| 7054        | CakSNP7054     | <i>Kabuli</i>    | Ca_Kabuli_Chr04              | 38343687                       | (C/T)       |
| 7055        | CakSNP7055     | <i>Kabuli</i>    | Ca_Kabuli_Chr04              | 38358067                       | (A/G)       |
| 7056        | CakSNP7056     | <i>Kabuli</i>    | Ca_Kabuli_Chr04              | 38358398                       | (A/G)       |
| 7057        | CakSNP7057     | <i>Kabuli</i>    | Ca_Kabuli_Chr04              | 38358677                       | (G/A)       |
| 7058        | CakSNP7058     | <i>Kabuli</i>    | Ca_Kabuli_Chr04              | 38358887                       | (G/A)       |
| 7059        | CakSNP7059     | <i>Kabuli</i>    | Ca_Kabuli_Chr04              | 38358869                       | (G/A)       |
| 7060        | CakSNP7060     | <i>Kabuli</i>    | Ca_Kabuli_Chr04              | 38362132                       | (T/A)       |
| 7061        | CakSNP7061     | <i>Kabuli</i>    | Ca_Kabuli_Chr04              | 38362139                       | (T/A)       |
| 7062        | CakSNP7062     | <i>Kabuli</i>    | Ca_Kabuli_Chr04              | 38364369                       | (C/T)       |
| 7063        | CakSNP7063     | <i>Kabuli</i>    | Ca_Kabuli_Chr04              | 38370848                       | (A/G)       |
| 7064        | CakSNP7064     | <i>Kabuli</i>    | Ca_Kabuli_Chr04              | 38370864                       | (G/A)       |
| 7065        | CakSNP7065     | <i>Kabuli</i>    | Ca_Kabuli_Chr04              | 38370941                       | (A/G)       |
| 7066        | CakSNP7066     | <i>Kabuli</i>    | Ca_Kabuli_Chr04              | 38370930                       | (C/T)       |
| 7067        | CakSNP7067     | <i>Kabuli</i>    | Ca_Kabuli_Chr04              | 38370926                       | (T/C)       |

| <b>S.N.</b> | <b>SNP IDs</b> | <b>Cultivars</b> | <b>Chromosomes/scaffolds</b> | <b>Physical positions (bp)</b> | <b>SNPs</b> |
|-------------|----------------|------------------|------------------------------|--------------------------------|-------------|
| 7068        | CakSNP7068     | <i>Kabuli</i>    | Ca_Kabuli_Chr04              | 38370925                       | (G/A)       |
| 7069        | CakSNP7069     | <i>Kabuli</i>    | Ca_Kabuli_Chr04              | 38370922                       | (G/A)       |
| 7070        | CakSNP7070     | <i>Kabuli</i>    | Ca_Kabuli_Chr04              | 38370921                       | (T/G)       |
| 7071        | CakSNP7071     | <i>Kabuli</i>    | Ca_Kabuli_Chr04              | 38382809                       | (T/C)       |
| 7072        | CakSNP7072     | <i>Kabuli</i>    | Ca_Kabuli_Chr04              | 38382890                       | (C/G)       |
| 7073        | CakSNP7073     | <i>Kabuli</i>    | Ca_Kabuli_Chr04              | 38421798                       | (A/C)       |
| 7074        | CakSNP7074     | <i>Kabuli</i>    | Ca_Kabuli_Chr04              | 38422037                       | (C/T)       |
| 7075        | CakSNP7075     | <i>Kabuli</i>    | Ca_Kabuli_Chr04              | 38421984                       | (C/T)       |
| 7076        | CakSNP7076     | <i>Kabuli</i>    | Ca_Kabuli_Chr04              | 38425675                       | (A/G)       |
| 7077        | CakSNP7077     | <i>Kabuli</i>    | Ca_Kabuli_Chr04              | 38425720                       | (T/A)       |
| 7078        | CakSNP7078     | <i>Kabuli</i>    | Ca_Kabuli_Chr04              | 38473540                       | (A/G)       |
| 7079        | CakSNP7079     | <i>Kabuli</i>    | Ca_Kabuli_Chr04              | 38473653                       | (T/C)       |
| 7080        | CakSNP7080     | <i>Kabuli</i>    | Ca_Kabuli_Chr04              | 38474123                       | (A/T)       |
| 7081        | CakSNP7081     | <i>Kabuli</i>    | Ca_Kabuli_Chr04              | 38474108                       | (T/C)       |
| 7082        | CakSNP7082     | <i>Kabuli</i>    | Ca_Kabuli_Chr04              | 38474192                       | (T/C)       |
| 7083        | CakSNP7083     | <i>Kabuli</i>    | Ca_Kabuli_Chr04              | 38475310                       | (A/C)       |
| 7084        | CakSNP7084     | <i>Kabuli</i>    | Ca_Kabuli_Chr04              | 38475425                       | (A/G)       |
| 7085        | CakSNP7085     | <i>Kabuli</i>    | Ca_Kabuli_Chr04              | 38475449                       | (T/A)       |
| 7086        | CakSNP7086     | <i>Kabuli</i>    | Ca_Kabuli_Chr04              | 38475442                       | (A/G)       |
| 7087        | CakSNP7087     | <i>Kabuli</i>    | Ca_Kabuli_Chr04              | 38475424                       | (C/G)       |
| 7088        | CakSNP7088     | <i>Kabuli</i>    | Ca_Kabuli_Chr04              | 38475547                       | (C/T)       |
| 7089        | CakSNP7089     | <i>Kabuli</i>    | Ca_Kabuli_Chr04              | 38540201                       | (C/T)       |
| 7090        | CakSNP7090     | <i>Kabuli</i>    | Ca_Kabuli_Chr04              | 38540236                       | (C/T)       |
| 7091        | CakSNP7091     | <i>Kabuli</i>    | Ca_Kabuli_Chr04              | 38540247                       | (G/A)       |
| 7092        | CakSNP7092     | <i>Kabuli</i>    | Ca_Kabuli_Chr04              | 38620579                       | (C/T)       |
| 7093        | CakSNP7093     | <i>Kabuli</i>    | Ca_Kabuli_Chr04              | 38620620                       | (A/T)       |
| 7094        | CakSNP7094     | <i>Kabuli</i>    | Ca_Kabuli_Chr04              | 38659377                       | (T/C)       |
| 7095        | CakSNP7095     | <i>Kabuli</i>    | Ca_Kabuli_Chr04              | 38659398                       | (G/A)       |
| 7096        | CakSNP7096     | <i>Kabuli</i>    | Ca_Kabuli_Chr04              | 38659534                       | (T/A)       |
| 7097        | CakSNP7097     | <i>Kabuli</i>    | Ca_Kabuli_Chr04              | 38679987                       | (A/G)       |
| 7098        | CakSNP7098     | <i>Kabuli</i>    | Ca_Kabuli_Chr04              | 38721154                       | (A/G)       |
| 7099        | CakSNP7099     | <i>Kabuli</i>    | Ca_Kabuli_Chr04              | 38721160                       | (A/G)       |
| 7100        | CakSNP7100     | <i>Kabuli</i>    | Ca_Kabuli_Chr04              | 38721207                       | (A/C)       |
| 7101        | CakSNP7101     | <i>Kabuli</i>    | Ca_Kabuli_Chr04              | 38756507                       | (T/C)       |
| 7102        | CakSNP7102     | <i>Kabuli</i>    | Ca_Kabuli_Chr04              | 38756510                       | (C/G)       |
| 7103        | CakSNP7103     | <i>Kabuli</i>    | Ca_Kabuli_Chr04              | 38759640                       | (A/C)       |
| 7104        | CakSNP7104     | <i>Kabuli</i>    | Ca_Kabuli_Chr04              | 38770348                       | (T/A)       |
| 7105        | CakSNP7105     | <i>Kabuli</i>    | Ca_Kabuli_Chr04              | 38770370                       | (G/C)       |

| <b>S.N.</b> | <b>SNP IDs</b> | <b>Cultivars</b> | <b>Chromosomes/scaffolds</b> | <b>Physical positions (bp)</b> | <b>SNPs</b> |
|-------------|----------------|------------------|------------------------------|--------------------------------|-------------|
| 7106        | CakSNP7106     | <i>Kabuli</i>    | Ca_Kabuli_Chr04              | 38770450                       | (C/G)       |
| 7107        | CakSNP7107     | <i>Kabuli</i>    | Ca_Kabuli_Chr04              | 38770510                       | (G/A)       |
| 7108        | CakSNP7108     | <i>Kabuli</i>    | Ca_Kabuli_Chr04              | 38770606                       | (G/A)       |
| 7109        | CakSNP7109     | <i>Kabuli</i>    | Ca_Kabuli_Chr04              | 38770582                       | (G/A)       |
| 7110        | CakSNP7110     | <i>Kabuli</i>    | Ca_Kabuli_Chr04              | 38785535                       | (G/A)       |
| 7111        | CakSNP7111     | <i>Kabuli</i>    | Ca_Kabuli_Chr04              | 38829959                       | (T/G)       |
| 7112        | CakSNP7112     | <i>Kabuli</i>    | Ca_Kabuli_Chr04              | 38833304                       | (C/A)       |
| 7113        | CakSNP7113     | <i>Kabuli</i>    | Ca_Kabuli_Chr04              | 38833280                       | (C/T)       |
| 7114        | CakSNP7114     | <i>Kabuli</i>    | Ca_Kabuli_Chr04              | 38833333                       | (A/C)       |
| 7115        | CakSNP7115     | <i>Kabuli</i>    | Ca_Kabuli_Chr04              | 38833414                       | (A/C)       |
| 7116        | CakSNP7116     | <i>Kabuli</i>    | Ca_Kabuli_Chr04              | 38834383                       | (G/A)       |
| 7117        | CakSNP7117     | <i>Kabuli</i>    | Ca_Kabuli_Chr04              | 38834405                       | (G/A)       |
| 7118        | CakSNP7118     | <i>Kabuli</i>    | Ca_Kabuli_Chr04              | 38834423                       | (G/C)       |
| 7119        | CakSNP7119     | <i>Kabuli</i>    | Ca_Kabuli_Chr04              | 38834431                       | (G/A)       |
| 7120        | CakSNP7120     | <i>Kabuli</i>    | Ca_Kabuli_Chr04              | 38834448                       | (A/T)       |
| 7121        | CakSNP7121     | <i>Kabuli</i>    | Ca_Kabuli_Chr04              | 38834477                       | (A/G)       |
| 7122        | CakSNP7122     | <i>Kabuli</i>    | Ca_Kabuli_Chr04              | 38834474                       | (G/A)       |
| 7123        | CakSNP7123     | <i>Kabuli</i>    | Ca_Kabuli_Chr04              | 38834453                       | (C/T)       |
| 7124        | CakSNP7124     | <i>Kabuli</i>    | Ca_Kabuli_Chr04              | 38888779                       | (C/T)       |
| 7125        | CakSNP7125     | <i>Kabuli</i>    | Ca_Kabuli_Chr04              | 38888791                       | (G/C)       |
| 7126        | CakSNP7126     | <i>Kabuli</i>    | Ca_Kabuli_Chr04              | 38889023                       | (C/T)       |
| 7127        | CakSNP7127     | <i>Kabuli</i>    | Ca_Kabuli_Chr04              | 38918394                       | (A/T)       |
| 7128        | CakSNP7128     | <i>Kabuli</i>    | Ca_Kabuli_Chr04              | 38918424                       | (G/A)       |
| 7129        | CakSNP7129     | <i>Kabuli</i>    | Ca_Kabuli_Chr04              | 38918430                       | (C/A)       |
| 7130        | CakSNP7130     | <i>Kabuli</i>    | Ca_Kabuli_Chr04              | 38918628                       | (C/T)       |
| 7131        | CakSNP7131     | <i>Kabuli</i>    | Ca_Kabuli_Chr04              | 38918547                       | (T/C)       |
| 7132        | CakSNP7132     | <i>Kabuli</i>    | Ca_Kabuli_Chr04              | 38918649                       | (G/C)       |
| 7133        | CakSNP7133     | <i>Kabuli</i>    | Ca_Kabuli_Chr04              | 38929681                       | (A/G)       |
| 7134        | CakSNP7134     | <i>Kabuli</i>    | Ca_Kabuli_Chr04              | 38948414                       | (C/A)       |
| 7135        | CakSNP7135     | <i>Kabuli</i>    | Ca_Kabuli_Chr04              | 38961521                       | (G/A)       |
| 7136        | CakSNP7136     | <i>Kabuli</i>    | Ca_Kabuli_Chr04              | 38978462                       | (A/G)       |
| 7137        | CakSNP7137     | <i>Kabuli</i>    | Ca_Kabuli_Chr04              | 39031801                       | (C/T)       |
| 7138        | CakSNP7138     | <i>Kabuli</i>    | Ca_Kabuli_Chr04              | 39031823                       | (G/A)       |
| 7139        | CakSNP7139     | <i>Kabuli</i>    | Ca_Kabuli_Chr04              | 39042938                       | (T/G)       |
| 7140        | CakSNP7140     | <i>Kabuli</i>    | Ca_Kabuli_Chr04              | 39042921                       | (T/C)       |
| 7141        | CakSNP7141     | <i>Kabuli</i>    | Ca_Kabuli_Chr04              | 39057991                       | (T/C)       |
| 7142        | CakSNP7142     | <i>Kabuli</i>    | Ca_Kabuli_Chr04              | 39058011                       | (G/C)       |
| 7143        | CakSNP7143     | <i>Kabuli</i>    | Ca_Kabuli_Chr04              | 39081951                       | (A/G)       |

| <b>S.N.</b> | <b>SNP IDs</b> | <b>Cultivars</b> | <b>Chromosomes/scaffolds</b> | <b>Physical positions (bp)</b> | <b>SNPs</b> |
|-------------|----------------|------------------|------------------------------|--------------------------------|-------------|
| 7144        | CakSNP7144     | <i>Kabuli</i>    | Ca_Kabuli_Chr04              | 39110408                       | (T/C)       |
| 7145        | CakSNP7145     | <i>Kabuli</i>    | Ca_Kabuli_Chr04              | 39110448                       | (A/G)       |
| 7146        | CakSNP7146     | <i>Kabuli</i>    | Ca_Kabuli_Chr04              | 39110735                       | (A/G)       |
| 7147        | CakSNP7147     | <i>Kabuli</i>    | Ca_Kabuli_Chr04              | 39113309                       | (T/C)       |
| 7148        | CakSNP7148     | <i>Kabuli</i>    | Ca_Kabuli_Chr04              | 39113327                       | (G/A)       |
| 7149        | CakSNP7149     | <i>Kabuli</i>    | Ca_Kabuli_Chr04              | 39113330                       | (G/A)       |
| 7150        | CakSNP7150     | <i>Kabuli</i>    | Ca_Kabuli_Chr04              | 39113401                       | (A/T)       |
| 7151        | CakSNP7151     | <i>Kabuli</i>    | Ca_Kabuli_Chr04              | 39114000                       | (A/C)       |
| 7152        | CakSNP7152     | <i>Kabuli</i>    | Ca_Kabuli_Chr04              | 39136826                       | (C/T)       |
| 7153        | CakSNP7153     | <i>Kabuli</i>    | Ca_Kabuli_Chr04              | 39189012                       | (A/G)       |
| 7154        | CakSNP7154     | <i>Kabuli</i>    | Ca_Kabuli_Chr04              | 39189016                       | (G/A)       |
| 7155        | CakSNP7155     | <i>Kabuli</i>    | Ca_Kabuli_Chr04              | 39268505                       | (T/C)       |
| 7156        | CakSNP7156     | <i>Kabuli</i>    | Ca_Kabuli_Chr04              | 39306900                       | (G/A)       |
| 7157        | CakSNP7157     | <i>Kabuli</i>    | Ca_Kabuli_Chr04              | 39635746                       | (T/A)       |
| 7158        | CakSNP7158     | <i>Kabuli</i>    | Ca_Kabuli_Chr04              | 39635721                       | (A/G)       |
| 7159        | CakSNP7159     | <i>Kabuli</i>    | Ca_Kabuli_Chr04              | 39635720                       | (G/A)       |
| 7160        | CakSNP7160     | <i>Kabuli</i>    | Ca_Kabuli_Chr04              | 39635718                       | (C/T)       |
| 7161        | CakSNP7161     | <i>Kabuli</i>    | Ca_Kabuli_Chr04              | 39650872                       | (T/C)       |
| 7162        | CakSNP7162     | <i>Kabuli</i>    | Ca_Kabuli_Chr04              | 39659757                       | (C/T)       |
| 7163        | CakSNP7163     | <i>Kabuli</i>    | Ca_Kabuli_Chr04              | 39659750                       | (G/A)       |
| 7164        | CakSNP7164     | <i>Kabuli</i>    | Ca_Kabuli_Chr04              | 39659832                       | (C/T)       |
| 7165        | CakSNP7165     | <i>Kabuli</i>    | Ca_Kabuli_Chr04              | 39715087                       | (A/G)       |
| 7166        | CakSNP7166     | <i>Kabuli</i>    | Ca_Kabuli_Chr04              | 39719606                       | (C/G)       |
| 7167        | CakSNP7167     | <i>Kabuli</i>    | Ca_Kabuli_Chr04              | 39719747                       | (G/T)       |
| 7168        | CakSNP7168     | <i>Kabuli</i>    | Ca_Kabuli_Chr04              | 39779796                       | (G/A)       |
| 7169        | CakSNP7169     | <i>Kabuli</i>    | Ca_Kabuli_Chr04              | 39803305                       | (T/C)       |
| 7170        | CakSNP7170     | <i>Kabuli</i>    | Ca_Kabuli_Chr04              | 39849612                       | (G/T)       |
| 7171        | CakSNP7171     | <i>Kabuli</i>    | Ca_Kabuli_Chr04              | 39849657                       | (G/A)       |
| 7172        | CakSNP7172     | <i>Kabuli</i>    | Ca_Kabuli_Chr04              | 39964930                       | (T/C)       |
| 7173        | CakSNP7173     | <i>Kabuli</i>    | Ca_Kabuli_Chr04              | 40010119                       | (A/C)       |
| 7174        | CakSNP7174     | <i>Kabuli</i>    | Ca_Kabuli_Chr04              | 40010201                       | (A/G)       |
| 7175        | CakSNP7175     | <i>Kabuli</i>    | Ca_Kabuli_Chr04              | 40010177                       | (G/A)       |
| 7176        | CakSNP7176     | <i>Kabuli</i>    | Ca_Kabuli_Chr04              | 40010165                       | (A/C)       |
| 7177        | CakSNP7177     | <i>Kabuli</i>    | Ca_Kabuli_Chr04              | 40059880                       | (C/T)       |
| 7178        | CakSNP7178     | <i>Kabuli</i>    | Ca_Kabuli_Chr04              | 40060022                       | (C/T)       |
| 7179        | CakSNP7179     | <i>Kabuli</i>    | Ca_Kabuli_Chr04              | 40060063                       | (T/G)       |
| 7180        | CakSNP7180     | <i>Kabuli</i>    | Ca_Kabuli_Chr04              | 40061195                       | (T/C)       |
| 7181        | CakSNP7181     | <i>Kabuli</i>    | Ca_Kabuli_Chr04              | 40061262                       | (A/C)       |

| <b>S.N.</b> | <b>SNP IDs</b> | <b>Cultivars</b> | <b>Chromosomes/scaffolds</b> | <b>Physical positions (bp)</b> | <b>SNPs</b> |
|-------------|----------------|------------------|------------------------------|--------------------------------|-------------|
| 7182        | CakSNP7182     | <i>Kabuli</i>    | Ca_Kabuli_Chr04              | 40065505                       | (T/A)       |
| 7183        | CakSNP7183     | <i>Kabuli</i>    | Ca_Kabuli_Chr04              | 40134460                       | (A/G)       |
| 7184        | CakSNP7184     | <i>Kabuli</i>    | Ca_Kabuli_Chr04              | 40134518                       | (T/C)       |
| 7185        | CakSNP7185     | <i>Kabuli</i>    | Ca_Kabuli_Chr04              | 40149064                       | (C/T)       |
| 7186        | CakSNP7186     | <i>Kabuli</i>    | Ca_Kabuli_Chr04              | 40149132                       | (G/C)       |
| 7187        | CakSNP7187     | <i>Kabuli</i>    | Ca_Kabuli_Chr04              | 40149324                       | (G/C)       |
| 7188        | CakSNP7188     | <i>Kabuli</i>    | Ca_Kabuli_Chr04              | 40169176                       | (T/G)       |
| 7189        | CakSNP7189     | <i>Kabuli</i>    | Ca_Kabuli_Chr04              | 40185606                       | (A/G)       |
| 7190        | CakSNP7190     | <i>Kabuli</i>    | Ca_Kabuli_Chr04              | 40199692                       | (A/C)       |
| 7191        | CakSNP7191     | <i>Kabuli</i>    | Ca_Kabuli_Chr04              | 40218375                       | (G/T)       |
| 7192        | CakSNP7192     | <i>Kabuli</i>    | Ca_Kabuli_Chr04              | 40218410                       | (G/A)       |
| 7193        | CakSNP7193     | <i>Kabuli</i>    | Ca_Kabuli_Chr04              | 40267713                       | (G/T)       |
| 7194        | CakSNP7194     | <i>Kabuli</i>    | Ca_Kabuli_Chr04              | 40267719                       | (G/A)       |
| 7195        | CakSNP7195     | <i>Kabuli</i>    | Ca_Kabuli_Chr04              | 40279513                       | (G/T)       |
| 7196        | CakSNP7196     | <i>Kabuli</i>    | Ca_Kabuli_Chr04              | 40313721                       | (A/G)       |
| 7197        | CakSNP7197     | <i>Kabuli</i>    | Ca_Kabuli_Chr04              | 40349170                       | (C/T)       |
| 7198        | CakSNP7198     | <i>Kabuli</i>    | Ca_Kabuli_Chr04              | 40368028                       | (C/T)       |
| 7199        | CakSNP7199     | <i>Kabuli</i>    | Ca_Kabuli_Chr04              | 40368278                       | (T/C)       |
| 7200        | CakSNP7200     | <i>Kabuli</i>    | Ca_Kabuli_Chr04              | 40368765                       | (G/A)       |
| 7201        | CakSNP7201     | <i>Kabuli</i>    | Ca_Kabuli_Chr04              | 40375386                       | (C/T)       |
| 7202        | CakSNP7202     | <i>Kabuli</i>    | Ca_Kabuli_Chr04              | 40375361                       | (A/G)       |
| 7203        | CakSNP7203     | <i>Kabuli</i>    | Ca_Kabuli_Chr04              | 40429387                       | (G/A)       |
| 7204        | CakSNP7204     | <i>Kabuli</i>    | Ca_Kabuli_Chr04              | 40471412                       | (G/C)       |
| 7205        | CakSNP7205     | <i>Kabuli</i>    | Ca_Kabuli_Chr04              | 40472097                       | (A/G)       |
| 7206        | CakSNP7206     | <i>Kabuli</i>    | Ca_Kabuli_Chr04              | 40513733                       | (C/T)       |
| 7207        | CakSNP7207     | <i>Kabuli</i>    | Ca_Kabuli_Chr04              | 40583205                       | (G/T)       |
| 7208        | CakSNP7208     | <i>Kabuli</i>    | Ca_Kabuli_Chr04              | 40583206                       | (A/T)       |
| 7209        | CakSNP7209     | <i>Kabuli</i>    | Ca_Kabuli_Chr04              | 40583211                       | (G/T)       |
| 7210        | CakSNP7210     | <i>Kabuli</i>    | Ca_Kabuli_Chr04              | 40583214                       | (G/A)       |
| 7211        | CakSNP7211     | <i>Kabuli</i>    | Ca_Kabuli_Chr04              | 40583216                       | (C/A)       |
| 7212        | CakSNP7212     | <i>Kabuli</i>    | Ca_Kabuli_Chr04              | 40583217                       | (G/A)       |
| 7213        | CakSNP7213     | <i>Kabuli</i>    | Ca_Kabuli_Chr04              | 40583219                       | (G/A)       |
| 7214        | CakSNP7214     | <i>Kabuli</i>    | Ca_Kabuli_Chr04              | 40597192                       | (G/A)       |
| 7215        | CakSNP7215     | <i>Kabuli</i>    | Ca_Kabuli_Chr04              | 40597534                       | (A/G)       |
| 7216        | CakSNP7216     | <i>Kabuli</i>    | Ca_Kabuli_Chr04              | 40597464                       | (G/A)       |
| 7217        | CakSNP7217     | <i>Kabuli</i>    | Ca_Kabuli_Chr04              | 40723208                       | (C/G)       |
| 7218        | CakSNP7218     | <i>Kabuli</i>    | Ca_Kabuli_Chr04              | 40723212                       | (G/A)       |
| 7219        | CakSNP7219     | <i>Kabuli</i>    | Ca_Kabuli_Chr04              | 40734572                       | (T/G)       |



| <b>S.N.</b> | <b>SNP IDs</b> | <b>Cultivars</b> | <b>Chromosomes/scaffolds</b> | <b>Physical positions (bp)</b> | <b>SNPs</b> |
|-------------|----------------|------------------|------------------------------|--------------------------------|-------------|
| 7220        | CakSNP7220     | <i>Kabuli</i>    | Ca_Kabuli_Chr04              | 40734765                       | (G/A)       |
| 7221        | CakSNP7221     | <i>Kabuli</i>    | Ca_Kabuli_Chr04              | 40738927                       | (C/T)       |
| 7222        | CakSNP7222     | <i>Kabuli</i>    | Ca_Kabuli_Chr04              | 40795060                       | (G/A)       |
| 7223        | CakSNP7223     | <i>Kabuli</i>    | Ca_Kabuli_Chr04              | 40795085                       | (C/G)       |
| 7224        | CakSNP7224     | <i>Kabuli</i>    | Ca_Kabuli_Chr04              | 40795137                       | (T/G)       |
| 7225        | CakSNP7225     | <i>Kabuli</i>    | Ca_Kabuli_Chr04              | 40801783                       | (T/C)       |
| 7226        | CakSNP7226     | <i>Kabuli</i>    | Ca_Kabuli_Chr04              | 40801791                       | (C/G)       |
| 7227        | CakSNP7227     | <i>Kabuli</i>    | Ca_Kabuli_Chr04              | 40805740                       | (C/A)       |
| 7228        | CakSNP7228     | <i>Kabuli</i>    | Ca_Kabuli_Chr04              | 40806993                       | (A/G)       |
| 7229        | CakSNP7229     | <i>Kabuli</i>    | Ca_Kabuli_Chr04              | 40839967                       | (G/A)       |
| 7230        | CakSNP7230     | <i>Kabuli</i>    | Ca_Kabuli_Chr04              | 40839949                       | (G/A)       |
| 7231        | CakSNP7231     | <i>Kabuli</i>    | Ca_Kabuli_Chr04              | 40852381                       | (A/C)       |
| 7232        | CakSNP7232     | <i>Kabuli</i>    | Ca_Kabuli_Chr04              | 40852475                       | (T/C)       |
| 7233        | CakSNP7233     | <i>Kabuli</i>    | Ca_Kabuli_Chr04              | 40912677                       | (A/G)       |
| 7234        | CakSNP7234     | <i>Kabuli</i>    | Ca_Kabuli_Chr04              | 40912681                       | (A/G)       |
| 7235        | CakSNP7235     | <i>Kabuli</i>    | Ca_Kabuli_Chr04              | 40912714                       | (C/G)       |
| 7236        | CakSNP7236     | <i>Kabuli</i>    | Ca_Kabuli_Chr04              | 40912731                       | (C/T)       |
| 7237        | CakSNP7237     | <i>Kabuli</i>    | Ca_Kabuli_Chr04              | 40917776                       | (C/A)       |
| 7238        | CakSNP7238     | <i>Kabuli</i>    | Ca_Kabuli_Chr04              | 40917777                       | (T/A)       |
| 7239        | CakSNP7239     | <i>Kabuli</i>    | Ca_Kabuli_Chr04              | 40917807                       | (C/T)       |
| 7240        | CakSNP7240     | <i>Kabuli</i>    | Ca_Kabuli_Chr04              | 40941283                       | (A/G)       |
| 7241        | CakSNP7241     | <i>Kabuli</i>    | Ca_Kabuli_Chr04              | 41032564                       | (A/G)       |
| 7242        | CakSNP7242     | <i>Kabuli</i>    | Ca_Kabuli_Chr04              | 41032590                       | (C/A)       |
| 7243        | CakSNP7243     | <i>Kabuli</i>    | Ca_Kabuli_Chr04              | 41032599                       | (T/C)       |
| 7244        | CakSNP7244     | <i>Kabuli</i>    | Ca_Kabuli_Chr04              | 41032608                       | (T/C)       |
| 7245        | CakSNP7245     | <i>Kabuli</i>    | Ca_Kabuli_Chr04              | 41070048                       | (C/G)       |
| 7246        | CakSNP7246     | <i>Kabuli</i>    | Ca_Kabuli_Chr04              | 41070017                       | (T/A)       |
| 7247        | CakSNP7247     | <i>Kabuli</i>    | Ca_Kabuli_Chr04              | 41094082                       | (T/C)       |
| 7248        | CakSNP7248     | <i>Kabuli</i>    | Ca_Kabuli_Chr04              | 41094554                       | (A/C)       |
| 7249        | CakSNP7249     | <i>Kabuli</i>    | Ca_Kabuli_Chr04              | 41094685                       | (G/C)       |
| 7250        | CakSNP7250     | <i>Kabuli</i>    | Ca_Kabuli_Chr04              | 41117822                       | (C/A)       |
| 7251        | CakSNP7251     | <i>Kabuli</i>    | Ca_Kabuli_Chr04              | 41141086                       | (G/T)       |
| 7252        | CakSNP7252     | <i>Kabuli</i>    | Ca_Kabuli_Chr04              | 41142299                       | (T/C)       |
| 7253        | CakSNP7253     | <i>Kabuli</i>    | Ca_Kabuli_Chr04              | 41142290                       | (A/G)       |
| 7254        | CakSNP7254     | <i>Kabuli</i>    | Ca_Kabuli_Chr04              | 41142288                       | (T/C)       |
| 7255        | CakSNP7255     | <i>Kabuli</i>    | Ca_Kabuli_Chr04              | 41144277                       | (T/A)       |
| 7256        | CakSNP7256     | <i>Kabuli</i>    | Ca_Kabuli_Chr04              | 41145767                       | (C/T)       |
| 7257        | CakSNP7257     | <i>Kabuli</i>    | Ca_Kabuli_Chr04              | 41145875                       | (G/A)       |

| <b>S.N.</b> | <b>SNP IDs</b> | <b>Cultivars</b> | <b>Chromosomes/scaffolds</b> | <b>Physical positions (bp)</b> | <b>SNPs</b> |
|-------------|----------------|------------------|------------------------------|--------------------------------|-------------|
| 7258        | CakSNP7258     | <i>Kabuli</i>    | Ca_Kabuli_Chr04              | 41207328                       | (C/T)       |
| 7259        | CakSNP7259     | <i>Kabuli</i>    | Ca_Kabuli_Chr04              | 41207356                       | (C/T)       |
| 7260        | CakSNP7260     | <i>Kabuli</i>    | Ca_Kabuli_Chr04              | 41207392                       | (T/G)       |
| 7261        | CakSNP7261     | <i>Kabuli</i>    | Ca_Kabuli_Chr04              | 41207354                       | (A/C)       |
| 7262        | CakSNP7262     | <i>Kabuli</i>    | Ca_Kabuli_Chr04              | 41209521                       | (T/G)       |
| 7263        | CakSNP7263     | <i>Kabuli</i>    | Ca_Kabuli_Chr04              | 41209711                       | (C/A)       |
| 7264        | CakSNP7264     | <i>Kabuli</i>    | Ca_Kabuli_Chr04              | 41215850                       | (A/C)       |
| 7265        | CakSNP7265     | <i>Kabuli</i>    | Ca_Kabuli_Chr04              | 41228918                       | (T/C)       |
| 7266        | CakSNP7266     | <i>Kabuli</i>    | Ca_Kabuli_Chr04              | 41229605                       | (C/T)       |
| 7267        | CakSNP7267     | <i>Kabuli</i>    | Ca_Kabuli_Chr04              | 41277786                       | (G/A)       |
| 7268        | CakSNP7268     | <i>Kabuli</i>    | Ca_Kabuli_Chr04              | 41277799                       | (T/G)       |
| 7269        | CakSNP7269     | <i>Kabuli</i>    | Ca_Kabuli_Chr04              | 41292152                       | (T/C)       |
| 7270        | CakSNP7270     | <i>Kabuli</i>    | Ca_Kabuli_Chr04              | 41319598                       | (T/C)       |
| 7271        | CakSNP7271     | <i>Kabuli</i>    | Ca_Kabuli_Chr04              | 41319610                       | (G/A)       |
| 7272        | CakSNP7272     | <i>Kabuli</i>    | Ca_Kabuli_Chr04              | 41344739                       | (A/T)       |
| 7273        | CakSNP7273     | <i>Kabuli</i>    | Ca_Kabuli_Chr04              | 41427081                       | (A/T)       |
| 7274        | CakSNP7274     | <i>Kabuli</i>    | Ca_Kabuli_Chr04              | 41427086                       | (C/A)       |
| 7275        | CakSNP7275     | <i>Kabuli</i>    | Ca_Kabuli_Chr04              | 41427093                       | (T/G)       |
| 7276        | CakSNP7276     | <i>Kabuli</i>    | Ca_Kabuli_Chr04              | 41445171                       | (T/C)       |
| 7277        | CakSNP7277     | <i>Kabuli</i>    | Ca_Kabuli_Chr04              | 41445212                       | (A/G)       |
| 7278        | CakSNP7278     | <i>Kabuli</i>    | Ca_Kabuli_Chr04              | 41445225                       | (A/T)       |
| 7279        | CakSNP7279     | <i>Kabuli</i>    | Ca_Kabuli_Chr04              | 41445242                       | (C/T)       |
| 7280        | CakSNP7280     | <i>Kabuli</i>    | Ca_Kabuli_Chr04              | 41458426                       | (A/G)       |
| 7281        | CakSNP7281     | <i>Kabuli</i>    | Ca_Kabuli_Chr04              | 41500284                       | (A/C)       |
| 7282        | CakSNP7282     | <i>Kabuli</i>    | Ca_Kabuli_Chr04              | 41500286                       | (A/G)       |
| 7283        | CakSNP7283     | <i>Kabuli</i>    | Ca_Kabuli_Chr04              | 41512840                       | (G/A)       |
| 7284        | CakSNP7284     | <i>Kabuli</i>    | Ca_Kabuli_Chr04              | 41568682                       | (A/C)       |
| 7285        | CakSNP7285     | <i>Kabuli</i>    | Ca_Kabuli_Chr04              | 41629852                       | (T/A)       |
| 7286        | CakSNP7286     | <i>Kabuli</i>    | Ca_Kabuli_Chr04              | 41648927                       | (C/T)       |
| 7287        | CakSNP7287     | <i>Kabuli</i>    | Ca_Kabuli_Chr04              | 41648998                       | (A/G)       |
| 7288        | CakSNP7288     | <i>Kabuli</i>    | Ca_Kabuli_Chr04              | 41675299                       | (A/T)       |
| 7289        | CakSNP7289     | <i>Kabuli</i>    | Ca_Kabuli_Chr04              | 41698291                       | (A/G)       |
| 7290        | CakSNP7290     | <i>Kabuli</i>    | Ca_Kabuli_Chr04              | 41698386                       | (A/G)       |
| 7291        | CakSNP7291     | <i>Kabuli</i>    | Ca_Kabuli_Chr04              | 41700712                       | (C/A)       |
| 7292        | CakSNP7292     | <i>Kabuli</i>    | Ca_Kabuli_Chr04              | 41721289                       | (G/A)       |
| 7293        | CakSNP7293     | <i>Kabuli</i>    | Ca_Kabuli_Chr04              | 41772690                       | (C/T)       |
| 7294        | CakSNP7294     | <i>Kabuli</i>    | Ca_Kabuli_Chr04              | 41772823                       | (G/A)       |
| 7295        | CakSNP7295     | <i>Kabuli</i>    | Ca_Kabuli_Chr04              | 41772796                       | (T/A)       |

| <b>S.N.</b> | <b>SNP IDs</b> | <b>Cultivars</b> | <b>Chromosomes/scaffolds</b> | <b>Physical positions (bp)</b> | <b>SNPs</b> |
|-------------|----------------|------------------|------------------------------|--------------------------------|-------------|
| 7296        | CakSNP7296     | <i>Kabuli</i>    | Ca_Kabuli_Chr04              | 41772794                       | (T/C)       |
| 7297        | CakSNP7297     | <i>Kabuli</i>    | Ca_Kabuli_Chr04              | 41864826                       | (G/A)       |
| 7298        | CakSNP7298     | <i>Kabuli</i>    | Ca_Kabuli_Chr04              | 41864846                       | (C/G)       |
| 7299        | CakSNP7299     | <i>Kabuli</i>    | Ca_Kabuli_Chr04              | 41938784                       | (A/G)       |
| 7300        | CakSNP7300     | <i>Kabuli</i>    | Ca_Kabuli_Chr04              | 41938812                       | (T/G)       |
| 7301        | CakSNP7301     | <i>Kabuli</i>    | Ca_Kabuli_Chr04              | 41956050                       | (C/G)       |
| 7302        | CakSNP7302     | <i>Kabuli</i>    | Ca_Kabuli_Chr04              | 41956085                       | (T/C)       |
| 7303        | CakSNP7303     | <i>Kabuli</i>    | Ca_Kabuli_Chr04              | 41987193                       | (A/G)       |
| 7304        | CakSNP7304     | <i>Kabuli</i>    | Ca_Kabuli_Chr04              | 42056479                       | (G/A)       |
| 7305        | CakSNP7305     | <i>Kabuli</i>    | Ca_Kabuli_Chr04              | 42092379                       | (T/G)       |
| 7306        | CakSNP7306     | <i>Kabuli</i>    | Ca_Kabuli_Chr04              | 42092381                       | (A/G)       |
| 7307        | CakSNP7307     | <i>Kabuli</i>    | Ca_Kabuli_Chr04              | 42092385                       | (G/A)       |
| 7308        | CakSNP7308     | <i>Kabuli</i>    | Ca_Kabuli_Chr04              | 42105737                       | (C/T)       |
| 7309        | CakSNP7309     | <i>Kabuli</i>    | Ca_Kabuli_Chr04              | 42105701                       | (A/T)       |
| 7310        | CakSNP7310     | <i>Kabuli</i>    | Ca_Kabuli_Chr04              | 42108980                       | (C/A)       |
| 7311        | CakSNP7311     | <i>Kabuli</i>    | Ca_Kabuli_Chr04              | 42246499                       | (C/T)       |
| 7312        | CakSNP7312     | <i>Kabuli</i>    | Ca_Kabuli_Chr04              | 42246527                       | (C/A)       |
| 7313        | CakSNP7313     | <i>Kabuli</i>    | Ca_Kabuli_Chr04              | 42246565                       | (T/G)       |
| 7314        | CakSNP7314     | <i>Kabuli</i>    | Ca_Kabuli_Chr04              | 42246566                       | (T/G)       |
| 7315        | CakSNP7315     | <i>Kabuli</i>    | Ca_Kabuli_Chr04              | 42246572                       | (T/G)       |
| 7316        | CakSNP7316     | <i>Kabuli</i>    | Ca_Kabuli_Chr04              | 42246653                       | (C/G)       |
| 7317        | CakSNP7317     | <i>Kabuli</i>    | Ca_Kabuli_Chr04              | 42273252                       | (G/A)       |
| 7318        | CakSNP7318     | <i>Kabuli</i>    | Ca_Kabuli_Chr04              | 42353949                       | (C/T)       |
| 7319        | CakSNP7319     | <i>Kabuli</i>    | Ca_Kabuli_Chr04              | 42499699                       | (A/T)       |
| 7320        | CakSNP7320     | <i>Kabuli</i>    | Ca_Kabuli_Chr04              | 42603642                       | (T/C)       |
| 7321        | CakSNP7321     | <i>Kabuli</i>    | Ca_Kabuli_Chr04              | 42768142                       | (T/G)       |
| 7322        | CakSNP7322     | <i>Kabuli</i>    | Ca_Kabuli_Chr04              | 42807483                       | (G/A)       |
| 7323        | CakSNP7323     | <i>Kabuli</i>    | Ca_Kabuli_Chr04              | 42807518                       | (A/G)       |
| 7324        | CakSNP7324     | <i>Kabuli</i>    | Ca_Kabuli_Chr04              | 42807509                       | (C/T)       |
| 7325        | CakSNP7325     | <i>Kabuli</i>    | Ca_Kabuli_Chr04              | 43319846                       | (A/G)       |
| 7326        | CakSNP7326     | <i>Kabuli</i>    | Ca_Kabuli_Chr04              | 43324547                       | (G/C)       |
| 7327        | CakSNP7327     | <i>Kabuli</i>    | Ca_Kabuli_Chr04              | 43431770                       | (C/T)       |
| 7328        | CakSNP7328     | <i>Kabuli</i>    | Ca_Kabuli_Chr04              | 43431772                       | (T/A)       |
| 7329        | CakSNP7329     | <i>Kabuli</i>    | Ca_Kabuli_Chr04              | 43431815                       | (G/T)       |
| 7330        | CakSNP7330     | <i>Kabuli</i>    | Ca_Kabuli_Chr04              | 43446753                       | (T/A)       |
| 7331        | CakSNP7331     | <i>Kabuli</i>    | Ca_Kabuli_Chr04              | 43447262                       | (A/T)       |
| 7332        | CakSNP7332     | <i>Kabuli</i>    | Ca_Kabuli_Chr04              | 43476193                       | (T/C)       |
| 7333        | CakSNP7333     | <i>Kabuli</i>    | Ca_Kabuli_Chr04              | 43653225                       | (A/G)       |

| <b>S.N.</b> | <b>SNP IDs</b> | <b>Cultivars</b> | <b>Chromosomes/scaffolds</b> | <b>Physical positions (bp)</b> | <b>SNPs</b> |
|-------------|----------------|------------------|------------------------------|--------------------------------|-------------|
| 7334        | CakSNP7334     | <i>Kabuli</i>    | Ca_Kabuli_Chr04              | 43653226                       | (C/T)       |
| 7335        | CakSNP7335     | <i>Kabuli</i>    | Ca_Kabuli_Chr04              | 43662224                       | (A/C)       |
| 7336        | CakSNP7336     | <i>Kabuli</i>    | Ca_Kabuli_Chr04              | 43677006                       | (T/G)       |
| 7337        | CakSNP7337     | <i>Kabuli</i>    | Ca_Kabuli_Chr04              | 43677222                       | (C/T)       |
| 7338        | CakSNP7338     | <i>Kabuli</i>    | Ca_Kabuli_Chr04              | 43722728                       | (T/C)       |
| 7339        | CakSNP7339     | <i>Kabuli</i>    | Ca_Kabuli_Chr04              | 43722727                       | (A/G)       |
| 7340        | CakSNP7340     | <i>Kabuli</i>    | Ca_Kabuli_Chr04              | 43722704                       | (C/G)       |
| 7341        | CakSNP7341     | <i>Kabuli</i>    | Ca_Kabuli_Chr04              | 43723219                       | (T/G)       |
| 7342        | CakSNP7342     | <i>Kabuli</i>    | Ca_Kabuli_Chr04              | 43723224                       | (C/A)       |
| 7343        | CakSNP7343     | <i>Kabuli</i>    | Ca_Kabuli_Chr04              | 43723248                       | (T/C)       |
| 7344        | CakSNP7344     | <i>Kabuli</i>    | Ca_Kabuli_Chr04              | 43726406                       | (C/T)       |
| 7345        | CakSNP7345     | <i>Kabuli</i>    | Ca_Kabuli_Chr04              | 43729063                       | (G/T)       |
| 7346        | CakSNP7346     | <i>Kabuli</i>    | Ca_Kabuli_Chr04              | 43729261                       | (C/G)       |
| 7347        | CakSNP7347     | <i>Kabuli</i>    | Ca_Kabuli_Chr04              | 43729266                       | (A/G)       |
| 7348        | CakSNP7348     | <i>Kabuli</i>    | Ca_Kabuli_Chr04              | 43807399                       | (C/T)       |
| 7349        | CakSNP7349     | <i>Kabuli</i>    | Ca_Kabuli_Chr04              | 43807460                       | (C/T)       |
| 7350        | CakSNP7350     | <i>Kabuli</i>    | Ca_Kabuli_Chr04              | 43840666                       | (C/G)       |
| 7351        | CakSNP7351     | <i>Kabuli</i>    | Ca_Kabuli_Chr04              | 43840650                       | (C/T)       |
| 7352        | CakSNP7352     | <i>Kabuli</i>    | Ca_Kabuli_Chr04              | 43979065                       | (A/G)       |
| 7353        | CakSNP7353     | <i>Kabuli</i>    | Ca_Kabuli_Chr04              | 44008835                       | (T/C)       |
| 7354        | CakSNP7354     | <i>Kabuli</i>    | Ca_Kabuli_Chr04              | 44059060                       | (C/T)       |
| 7355        | CakSNP7355     | <i>Kabuli</i>    | Ca_Kabuli_Chr04              | 44059061                       | (G/A)       |
| 7356        | CakSNP7356     | <i>Kabuli</i>    | Ca_Kabuli_Chr04              | 44067780                       | (G/A)       |
| 7357        | CakSNP7357     | <i>Kabuli</i>    | Ca_Kabuli_Chr04              | 44090929                       | (T/G)       |
| 7358        | CakSNP7358     | <i>Kabuli</i>    | Ca_Kabuli_Chr04              | 44186434                       | (C/G)       |
| 7359        | CakSNP7359     | <i>Kabuli</i>    | Ca_Kabuli_Chr04              | 44239783                       | (A/C)       |
| 7360        | CakSNP7360     | <i>Kabuli</i>    | Ca_Kabuli_Chr04              | 44239883                       | (A/T)       |
| 7361        | CakSNP7361     | <i>Kabuli</i>    | Ca_Kabuli_Chr04              | 44250159                       | (C/T)       |
| 7362        | CakSNP7362     | <i>Kabuli</i>    | Ca_Kabuli_Chr04              | 44261184                       | (A/C)       |
| 7363        | CakSNP7363     | <i>Kabuli</i>    | Ca_Kabuli_Chr04              | 44261909                       | (T/A)       |
| 7364        | CakSNP7364     | <i>Kabuli</i>    | Ca_Kabuli_Chr04              | 44266692                       | (T/A)       |
| 7365        | CakSNP7365     | <i>Kabuli</i>    | Ca_Kabuli_Chr04              | 44266695                       | (G/A)       |
| 7366        | CakSNP7366     | <i>Kabuli</i>    | Ca_Kabuli_Chr04              | 44266758                       | (C/T)       |
| 7367        | CakSNP7367     | <i>Kabuli</i>    | Ca_Kabuli_Chr04              | 44266819                       | (G/A)       |
| 7368        | CakSNP7368     | <i>Kabuli</i>    | Ca_Kabuli_Chr04              | 44353354                       | (C/T)       |
| 7369        | CakSNP7369     | <i>Kabuli</i>    | Ca_Kabuli_Chr04              | 44353343                       | (G/A)       |
| 7370        | CakSNP7370     | <i>Kabuli</i>    | Ca_Kabuli_Chr04              | 44375761                       | (T/C)       |
| 7371        | CakSNP7371     | <i>Kabuli</i>    | Ca_Kabuli_Chr04              | 44375831                       | (T/C)       |

| <b>S.N.</b> | <b>SNP IDs</b> | <b>Cultivars</b> | <b>Chromosomes/scaffolds</b> | <b>Physical positions (bp)</b> | <b>SNPs</b> |
|-------------|----------------|------------------|------------------------------|--------------------------------|-------------|
| 7372        | CakSNP7372     | <i>Kabuli</i>    | Ca_Kabuli_Chr04              | 44382515                       | (A/G)       |
| 7373        | CakSNP7373     | <i>Kabuli</i>    | Ca_Kabuli_Chr04              | 44382677                       | (C/T)       |
| 7374        | CakSNP7374     | <i>Kabuli</i>    | Ca_Kabuli_Chr04              | 44382671                       | (C/G)       |
| 7375        | CakSNP7375     | <i>Kabuli</i>    | Ca_Kabuli_Chr04              | 44382614                       | (C/A)       |
| 7376        | CakSNP7376     | <i>Kabuli</i>    | Ca_Kabuli_Chr04              | 44382602                       | (A/G)       |
| 7377        | CakSNP7377     | <i>Kabuli</i>    | Ca_Kabuli_Chr04              | 44386579                       | (A/G)       |
| 7378        | CakSNP7378     | <i>Kabuli</i>    | Ca_Kabuli_Chr04              | 44431319                       | (A/C)       |
| 7379        | CakSNP7379     | <i>Kabuli</i>    | Ca_Kabuli_Chr04              | 44431353                       | (G/A)       |
| 7380        | CakSNP7380     | <i>Kabuli</i>    | Ca_Kabuli_Chr04              | 44439372                       | (C/T)       |
| 7381        | CakSNP7381     | <i>Kabuli</i>    | Ca_Kabuli_Chr04              | 44439503                       | (C/A)       |
| 7382        | CakSNP7382     | <i>Kabuli</i>    | Ca_Kabuli_Chr04              | 44439495                       | (G/A)       |
| 7383        | CakSNP7383     | <i>Kabuli</i>    | Ca_Kabuli_Chr04              | 44439493                       | (A/G)       |
| 7384        | CakSNP7384     | <i>Kabuli</i>    | Ca_Kabuli_Chr04              | 44439492                       | (G/T)       |
| 7385        | CakSNP7385     | <i>Kabuli</i>    | Ca_Kabuli_Chr04              | 44439448                       | (T/C)       |
| 7386        | CakSNP7386     | <i>Kabuli</i>    | Ca_Kabuli_Chr04              | 44446468                       | (G/A)       |
| 7387        | CakSNP7387     | <i>Kabuli</i>    | Ca_Kabuli_Chr04              | 44446575                       | (G/A)       |
| 7388        | CakSNP7388     | <i>Kabuli</i>    | Ca_Kabuli_Chr04              | 44446506                       | (C/T)       |
| 7389        | CakSNP7389     | <i>Kabuli</i>    | Ca_Kabuli_Chr04              | 44446503                       | (T/G)       |
| 7390        | CakSNP7390     | <i>Kabuli</i>    | Ca_Kabuli_Chr04              | 44446497                       | (C/T)       |
| 7391        | CakSNP7391     | <i>Kabuli</i>    | Ca_Kabuli_Chr04              | 44472282                       | (G/A)       |
| 7392        | CakSNP7392     | <i>Kabuli</i>    | Ca_Kabuli_Chr04              | 44472278                       | (A/G)       |
| 7393        | CakSNP7393     | <i>Kabuli</i>    | Ca_Kabuli_Chr04              | 44472237                       | (T/A)       |
| 7394        | CakSNP7394     | <i>Kabuli</i>    | Ca_Kabuli_Chr04              | 44590652                       | (T/C)       |
| 7395        | CakSNP7395     | <i>Kabuli</i>    | Ca_Kabuli_Chr04              | 44590678                       | (G/A)       |
| 7396        | CakSNP7396     | <i>Kabuli</i>    | Ca_Kabuli_Chr04              | 44590697                       | (A/C)       |
| 7397        | CakSNP7397     | <i>Kabuli</i>    | Ca_Kabuli_Chr04              | 44591405                       | (G/T)       |
| 7398        | CakSNP7398     | <i>Kabuli</i>    | Ca_Kabuli_Chr04              | 44754355                       | (C/T)       |
| 7399        | CakSNP7399     | <i>Kabuli</i>    | Ca_Kabuli_Chr04              | 44802374                       | (G/A)       |
| 7400        | CakSNP7400     | <i>Kabuli</i>    | Ca_Kabuli_Chr04              | 44802364                       | (A/C)       |
| 7401        | CakSNP7401     | <i>Kabuli</i>    | Ca_Kabuli_Chr04              | 44803694                       | (T/A)       |
| 7402        | CakSNP7402     | <i>Kabuli</i>    | Ca_Kabuli_Chr04              | 44811519                       | (G/A)       |
| 7403        | CakSNP7403     | <i>Kabuli</i>    | Ca_Kabuli_Chr04              | 44814857                       | (A/G)       |
| 7404        | CakSNP7404     | <i>Kabuli</i>    | Ca_Kabuli_Chr04              | 44814981                       | (T/C)       |
| 7405        | CakSNP7405     | <i>Kabuli</i>    | Ca_Kabuli_Chr04              | 44814982                       | (A/G)       |
| 7406        | CakSNP7406     | <i>Kabuli</i>    | Ca_Kabuli_Chr04              | 44824103                       | (G/T)       |
| 7407        | CakSNP7407     | <i>Kabuli</i>    | Ca_Kabuli_Chr04              | 44824105                       | (T/G)       |
| 7408        | CakSNP7408     | <i>Kabuli</i>    | Ca_Kabuli_Chr04              | 44824178                       | (C/G)       |
| 7409        | CakSNP7409     | <i>Kabuli</i>    | Ca_Kabuli_Chr04              | 44824258                       | (A/G)       |

| <b>S.N.</b> | <b>SNP IDs</b> | <b>Cultivars</b> | <b>Chromosomes/scaffolds</b> | <b>Physical positions (bp)</b> | <b>SNPs</b> |
|-------------|----------------|------------------|------------------------------|--------------------------------|-------------|
| 7410        | CakSNP7410     | <i>Kabuli</i>    | Ca_Kabuli_Chr04              | 44832121                       | (G/C)       |
| 7411        | CakSNP7411     | <i>Kabuli</i>    | Ca_Kabuli_Chr04              | 44832144                       | (T/C)       |
| 7412        | CakSNP7412     | <i>Kabuli</i>    | Ca_Kabuli_Chr04              | 44906128                       | (C/A)       |
| 7413        | CakSNP7413     | <i>Kabuli</i>    | Ca_Kabuli_Chr04              | 44906255                       | (A/G)       |
| 7414        | CakSNP7414     | <i>Kabuli</i>    | Ca_Kabuli_Chr04              | 44979108                       | (G/A)       |
| 7415        | CakSNP7415     | <i>Kabuli</i>    | Ca_Kabuli_Chr04              | 45019764                       | (T/C)       |
| 7416        | CakSNP7416     | <i>Kabuli</i>    | Ca_Kabuli_Chr04              | 45019778                       | (T/C)       |
| 7417        | CakSNP7417     | <i>Kabuli</i>    | Ca_Kabuli_Chr04              | 45019787                       | (G/C)       |
| 7418        | CakSNP7418     | <i>Kabuli</i>    | Ca_Kabuli_Chr04              | 45019805                       | (C/A)       |
| 7419        | CakSNP7419     | <i>Kabuli</i>    | Ca_Kabuli_Chr04              | 45019807                       | (C/T)       |
| 7420        | CakSNP7420     | <i>Kabuli</i>    | Ca_Kabuli_Chr04              | 45019814                       | (C/A)       |
| 7421        | CakSNP7421     | <i>Kabuli</i>    | Ca_Kabuli_Chr04              | 45019820                       | (C/T)       |
| 7422        | CakSNP7422     | <i>Kabuli</i>    | Ca_Kabuli_Chr04              | 45019824                       | (A/C)       |
| 7423        | CakSNP7423     | <i>Kabuli</i>    | Ca_Kabuli_Chr04              | 45019867                       | (C/G)       |
| 7424        | CakSNP7424     | <i>Kabuli</i>    | Ca_Kabuli_Chr04              | 45019858                       | (G/T)       |
| 7425        | CakSNP7425     | <i>Kabuli</i>    | Ca_Kabuli_Chr04              | 45019848                       | (C/T)       |
| 7426        | CakSNP7426     | <i>Kabuli</i>    | Ca_Kabuli_Chr04              | 45035589                       | (G/T)       |
| 7427        | CakSNP7427     | <i>Kabuli</i>    | Ca_Kabuli_Chr04              | 45035629                       | (A/C)       |
| 7428        | CakSNP7428     | <i>Kabuli</i>    | Ca_Kabuli_Chr04              | 45035745                       | (A/G)       |
| 7429        | CakSNP7429     | <i>Kabuli</i>    | Ca_Kabuli_Chr04              | 45067534                       | (C/T)       |
| 7430        | CakSNP7430     | <i>Kabuli</i>    | Ca_Kabuli_Chr04              | 45104767                       | (G/A)       |
| 7431        | CakSNP7431     | <i>Kabuli</i>    | Ca_Kabuli_Chr04              | 45104779                       | (C/A)       |
| 7432        | CakSNP7432     | <i>Kabuli</i>    | Ca_Kabuli_Chr04              | 45104805                       | (A/G)       |
| 7433        | CakSNP7433     | <i>Kabuli</i>    | Ca_Kabuli_Chr04              | 45141976                       | (C/A)       |
| 7434        | CakSNP7434     | <i>Kabuli</i>    | Ca_Kabuli_Chr04              | 45141990                       | (A/G)       |
| 7435        | CakSNP7435     | <i>Kabuli</i>    | Ca_Kabuli_Chr04              | 45142020                       | (T/C)       |
| 7436        | CakSNP7436     | <i>Kabuli</i>    | Ca_Kabuli_Chr04              | 45142009                       | (C/T)       |
| 7437        | CakSNP7437     | <i>Kabuli</i>    | Ca_Kabuli_Chr04              | 45142003                       | (A/G)       |
| 7438        | CakSNP7438     | <i>Kabuli</i>    | Ca_Kabuli_Chr04              | 45142077                       | (C/A)       |
| 7439        | CakSNP7439     | <i>Kabuli</i>    | Ca_Kabuli_Chr04              | 45142087                       | (T/A)       |
| 7440        | CakSNP7440     | <i>Kabuli</i>    | Ca_Kabuli_Chr04              | 45142104                       | (T/C)       |
| 7441        | CakSNP7441     | <i>Kabuli</i>    | Ca_Kabuli_Chr04              | 45165191                       | (T/C)       |
| 7442        | CakSNP7442     | <i>Kabuli</i>    | Ca_Kabuli_Chr04              | 45165246                       | (C/G)       |
| 7443        | CakSNP7443     | <i>Kabuli</i>    | Ca_Kabuli_Chr04              | 45165240                       | (T/C)       |
| 7444        | CakSNP7444     | <i>Kabuli</i>    | Ca_Kabuli_Chr04              | 45165231                       | (A/C)       |
| 7445        | CakSNP7445     | <i>Kabuli</i>    | Ca_Kabuli_Chr04              | 45206203                       | (G/T)       |
| 7446        | CakSNP7446     | <i>Kabuli</i>    | Ca_Kabuli_Chr04              | 45206209                       | (G/C)       |
| 7447        | CakSNP7447     | <i>Kabuli</i>    | Ca_Kabuli_Chr04              | 45220084                       | (G/T)       |

| <b>S.N.</b> | <b>SNP IDs</b> | <b>Cultivars</b> | <b>Chromosomes/scaffolds</b> | <b>Physical positions (bp)</b> | <b>SNPs</b> |
|-------------|----------------|------------------|------------------------------|--------------------------------|-------------|
| 7448        | CakSNP7448     | <i>Kabuli</i>    | Ca_Kabuli_Chr04              | 45220642                       | (C/T)       |
| 7449        | CakSNP7449     | <i>Kabuli</i>    | Ca_Kabuli_Chr04              | 45220916                       | (T/C)       |
| 7450        | CakSNP7450     | <i>Kabuli</i>    | Ca_Kabuli_Chr04              | 45225063                       | (T/C)       |
| 7451        | CakSNP7451     | <i>Kabuli</i>    | Ca_Kabuli_Chr04              | 45225059                       | (G/A)       |
| 7452        | CakSNP7452     | <i>Kabuli</i>    | Ca_Kabuli_Chr04              | 45224997                       | (G/C)       |
| 7453        | CakSNP7453     | <i>Kabuli</i>    | Ca_Kabuli_Chr04              | 45225077                       | (A/T)       |
| 7454        | CakSNP7454     | <i>Kabuli</i>    | Ca_Kabuli_Chr04              | 45225093                       | (G/A)       |
| 7455        | CakSNP7455     | <i>Kabuli</i>    | Ca_Kabuli_Chr04              | 45225145                       | (T/A)       |
| 7456        | CakSNP7456     | <i>Kabuli</i>    | Ca_Kabuli_Chr04              | 45225154                       | (T/A)       |
| 7457        | CakSNP7457     | <i>Kabuli</i>    | Ca_Kabuli_Chr04              | 45225155                       | (C/A)       |
| 7458        | CakSNP7458     | <i>Kabuli</i>    | Ca_Kabuli_Chr04              | 45225210                       | (G/T)       |
| 7459        | CakSNP7459     | <i>Kabuli</i>    | Ca_Kabuli_Chr04              | 45225193                       | (A/G)       |
| 7460        | CakSNP7460     | <i>Kabuli</i>    | Ca_Kabuli_Chr04              | 45225165                       | (T/C)       |
| 7461        | CakSNP7461     | <i>Kabuli</i>    | Ca_Kabuli_Chr04              | 45231839                       | (T/C)       |
| 7462        | CakSNP7462     | <i>Kabuli</i>    | Ca_Kabuli_Chr04              | 45231867                       | (A/T)       |
| 7463        | CakSNP7463     | <i>Kabuli</i>    | Ca_Kabuli_Chr04              | 45231868                       | (C/A)       |
| 7464        | CakSNP7464     | <i>Kabuli</i>    | Ca_Kabuli_Chr04              | 45231893                       | (G/T)       |
| 7465        | CakSNP7465     | <i>Kabuli</i>    | Ca_Kabuli_Chr04              | 45292852                       | (G/T)       |
| 7466        | CakSNP7466     | <i>Kabuli</i>    | Ca_Kabuli_Chr04              | 45292918                       | (T/G)       |
| 7467        | CakSNP7467     | <i>Kabuli</i>    | Ca_Kabuli_Chr04              | 45292981                       | (G/T)       |
| 7468        | CakSNP7468     | <i>Kabuli</i>    | Ca_Kabuli_Chr04              | 45292969                       | (T/A)       |
| 7469        | CakSNP7469     | <i>Kabuli</i>    | Ca_Kabuli_Chr04              | 45292960                       | (A/T)       |
| 7470        | CakSNP7470     | <i>Kabuli</i>    | Ca_Kabuli_Chr04              | 45552675                       | (C/A)       |
| 7471        | CakSNP7471     | <i>Kabuli</i>    | Ca_Kabuli_Chr04              | 45595233                       | (G/A)       |
| 7472        | CakSNP7472     | <i>Kabuli</i>    | Ca_Kabuli_Chr04              | 45612178                       | (T/G)       |
| 7473        | CakSNP7473     | <i>Kabuli</i>    | Ca_Kabuli_Chr04              | 45615465                       | (C/T)       |
| 7474        | CakSNP7474     | <i>Kabuli</i>    | Ca_Kabuli_Chr04              | 45615457                       | (C/T)       |
| 7475        | CakSNP7475     | <i>Kabuli</i>    | Ca_Kabuli_Chr04              | 45615452                       | (A/C)       |
| 7476        | CakSNP7476     | <i>Kabuli</i>    | Ca_Kabuli_Chr04              | 45615401                       | (T/G)       |
| 7477        | CakSNP7477     | <i>Kabuli</i>    | Ca_Kabuli_Chr04              | 45646003                       | (A/G)       |
| 7478        | CakSNP7478     | <i>Kabuli</i>    | Ca_Kabuli_Chr04              | 45645996                       | (A/G)       |
| 7479        | CakSNP7479     | <i>Kabuli</i>    | Ca_Kabuli_Chr04              | 45645957                       | (A/C)       |
| 7480        | CakSNP7480     | <i>Kabuli</i>    | Ca_Kabuli_Chr04              | 45708895                       | (C/A)       |
| 7481        | CakSNP7481     | <i>Kabuli</i>    | Ca_Kabuli_Chr04              | 45735754                       | (G/C)       |
| 7482        | CakSNP7482     | <i>Kabuli</i>    | Ca_Kabuli_Chr04              | 45735819                       | (T/C)       |
| 7483        | CakSNP7483     | <i>Kabuli</i>    | Ca_Kabuli_Chr04              | 45751623                       | (G/A)       |
| 7484        | CakSNP7484     | <i>Kabuli</i>    | Ca_Kabuli_Chr04              | 45751618                       | (C/T)       |
| 7485        | CakSNP7485     | <i>Kabuli</i>    | Ca_Kabuli_Chr04              | 45752844                       | (G/A)       |

| <b>S.N.</b> | <b>SNP IDs</b> | <b>Cultivars</b> | <b>Chromosomes/scaffolds</b> | <b>Physical positions (bp)</b> | <b>SNPs</b> |
|-------------|----------------|------------------|------------------------------|--------------------------------|-------------|
| 7486        | CakSNP7486     | <i>Kabuli</i>    | Ca_Kabuli_Chr04              | 45752869                       | (G/T)       |
| 7487        | CakSNP7487     | <i>Kabuli</i>    | Ca_Kabuli_Chr04              | 45752874                       | (A/T)       |
| 7488        | CakSNP7488     | <i>Kabuli</i>    | Ca_Kabuli_Chr04              | 45782453                       | (A/T)       |
| 7489        | CakSNP7489     | <i>Kabuli</i>    | Ca_Kabuli_Chr04              | 45870087                       | (T/C)       |
| 7490        | CakSNP7490     | <i>Kabuli</i>    | Ca_Kabuli_Chr04              | 45870042                       | (C/T)       |
| 7491        | CakSNP7491     | <i>Kabuli</i>    | Ca_Kabuli_Chr04              | 45918351                       | (A/C)       |
| 7492        | CakSNP7492     | <i>Kabuli</i>    | Ca_Kabuli_Chr04              | 45935594                       | (A/C)       |
| 7493        | CakSNP7493     | <i>Kabuli</i>    | Ca_Kabuli_Chr04              | 45942252                       | (G/A)       |
| 7494        | CakSNP7494     | <i>Kabuli</i>    | Ca_Kabuli_Chr04              | 45942341                       | (T/C)       |
| 7495        | CakSNP7495     | <i>Kabuli</i>    | Ca_Kabuli_Chr04              | 45942729                       | (G/A)       |
| 7496        | CakSNP7496     | <i>Kabuli</i>    | Ca_Kabuli_Chr04              | 46134302                       | (C/G)       |
| 7497        | CakSNP7497     | <i>Kabuli</i>    | Ca_Kabuli_Chr04              | 46140729                       | (A/T)       |
| 7498        | CakSNP7498     | <i>Kabuli</i>    | Ca_Kabuli_Chr04              | 46148985                       | (A/T)       |
| 7499        | CakSNP7499     | <i>Kabuli</i>    | Ca_Kabuli_Chr04              | 46149013                       | (A/G)       |
| 7500        | CakSNP7500     | <i>Kabuli</i>    | Ca_Kabuli_Chr04              | 46150670                       | (T/C)       |
| 7501        | CakSNP7501     | <i>Kabuli</i>    | Ca_Kabuli_Chr04              | 46202862                       | (A/G)       |
| 7502        | CakSNP7502     | <i>Kabuli</i>    | Ca_Kabuli_Chr04              | 46344790                       | (G/A)       |
| 7503        | CakSNP7503     | <i>Kabuli</i>    | Ca_Kabuli_Chr04              | 46344826                       | (A/G)       |
| 7504        | CakSNP7504     | <i>Kabuli</i>    | Ca_Kabuli_Chr04              | 46345042                       | (A/G)       |
| 7505        | CakSNP7505     | <i>Kabuli</i>    | Ca_Kabuli_Chr04              | 46402035                       | (G/A)       |
| 7506        | CakSNP7506     | <i>Kabuli</i>    | Ca_Kabuli_Chr04              | 46430326                       | (C/T)       |
| 7507        | CakSNP7507     | <i>Kabuli</i>    | Ca_Kabuli_Chr04              | 46430311                       | (C/A)       |
| 7508        | CakSNP7508     | <i>Kabuli</i>    | Ca_Kabuli_Chr04              | 46430288                       | (G/C)       |
| 7509        | CakSNP7509     | <i>Kabuli</i>    | Ca_Kabuli_Chr04              | 46605167                       | (A/G)       |
| 7510        | CakSNP7510     | <i>Kabuli</i>    | Ca_Kabuli_Chr04              | 46605131                       | (T/A)       |
| 7511        | CakSNP7511     | <i>Kabuli</i>    | Ca_Kabuli_Chr04              | 46612175                       | (G/A)       |
| 7512        | CakSNP7512     | <i>Kabuli</i>    | Ca_Kabuli_Chr04              | 46612197                       | (G/A)       |
| 7513        | CakSNP7513     | <i>Kabuli</i>    | Ca_Kabuli_Chr04              | 46612244                       | (C/T)       |
| 7514        | CakSNP7514     | <i>Kabuli</i>    | Ca_Kabuli_Chr04              | 46613068                       | (T/G)       |
| 7515        | CakSNP7515     | <i>Kabuli</i>    | Ca_Kabuli_Chr04              | 46694919                       | (T/A)       |
| 7516        | CakSNP7516     | <i>Kabuli</i>    | Ca_Kabuli_Chr04              | 46695043                       | (A/C)       |
| 7517        | CakSNP7517     | <i>Kabuli</i>    | Ca_Kabuli_Chr04              | 46695008                       | (T/C)       |
| 7518        | CakSNP7518     | <i>Kabuli</i>    | Ca_Kabuli_Chr04              | 46705181                       | (G/T)       |
| 7519        | CakSNP7519     | <i>Kabuli</i>    | Ca_Kabuli_Chr04              | 46705178                       | (A/T)       |
| 7520        | CakSNP7520     | <i>Kabuli</i>    | Ca_Kabuli_Chr04              | 46705225                       | (A/C)       |
| 7521        | CakSNP7521     | <i>Kabuli</i>    | Ca_Kabuli_Chr04              | 46713972                       | (C/T)       |
| 7522        | CakSNP7522     | <i>Kabuli</i>    | Ca_Kabuli_Chr04              | 46715350                       | (T/C)       |
| 7523        | CakSNP7523     | <i>Kabuli</i>    | Ca_Kabuli_Chr04              | 46715518                       | (G/C)       |



| <b>S.N.</b> | <b>SNP IDs</b> | <b>Cultivars</b> | <b>Chromosomes/scaffolds</b> | <b>Physical positions (bp)</b> | <b>SNPs</b> |
|-------------|----------------|------------------|------------------------------|--------------------------------|-------------|
| 7524        | CakSNP7524     | <i>Kabuli</i>    | Ca_Kabuli_Chr04              | 46717155                       | (T/C)       |
| 7525        | CakSNP7525     | <i>Kabuli</i>    | Ca_Kabuli_Chr04              | 46717153                       | (C/T)       |
| 7526        | CakSNP7526     | <i>Kabuli</i>    | Ca_Kabuli_Chr04              | 46717200                       | (C/T)       |
| 7527        | CakSNP7527     | <i>Kabuli</i>    | Ca_Kabuli_Chr04              | 46717508                       | (G/A)       |
| 7528        | CakSNP7528     | <i>Kabuli</i>    | Ca_Kabuli_Chr04              | 46763540                       | (C/T)       |
| 7529        | CakSNP7529     | <i>Kabuli</i>    | Ca_Kabuli_Chr04              | 46763555                       | (C/T)       |
| 7530        | CakSNP7530     | <i>Kabuli</i>    | Ca_Kabuli_Chr04              | 46763868                       | (T/C)       |
| 7531        | CakSNP7531     | <i>Kabuli</i>    | Ca_Kabuli_Chr04              | 46763841                       | (A/C)       |
| 7532        | CakSNP7532     | <i>Kabuli</i>    | Ca_Kabuli_Chr04              | 47223016                       | (T/C)       |
| 7533        | CakSNP7533     | <i>Kabuli</i>    | Ca_Kabuli_Chr04              | 47223047                       | (A/G)       |
| 7534        | CakSNP7534     | <i>Kabuli</i>    | Ca_Kabuli_Chr04              | 47223635                       | (G/A)       |
| 7535        | CakSNP7535     | <i>Kabuli</i>    | Ca_Kabuli_Chr04              | 47223668                       | (T/G)       |
| 7536        | CakSNP7536     | <i>Kabuli</i>    | Ca_Kabuli_Chr04              | 47296400                       | (C/T)       |
| 7537        | CakSNP7537     | <i>Kabuli</i>    | Ca_Kabuli_Chr04              | 47379992                       | (C/T)       |
| 7538        | CakSNP7538     | <i>Kabuli</i>    | Ca_Kabuli_Chr04              | 47405685                       | (T/A)       |
| 7539        | CakSNP7539     | <i>Kabuli</i>    | Ca_Kabuli_Chr04              | 47419514                       | (A/G)       |
| 7540        | CakSNP7540     | <i>Kabuli</i>    | Ca_Kabuli_Chr04              | 47419517                       | (C/T)       |
| 7541        | CakSNP7541     | <i>Kabuli</i>    | Ca_Kabuli_Chr04              | 47428580                       | (C/T)       |
| 7542        | CakSNP7542     | <i>Kabuli</i>    | Ca_Kabuli_Chr04              | 47428599                       | (C/T)       |
| 7543        | CakSNP7543     | <i>Kabuli</i>    | Ca_Kabuli_Chr04              | 47428631                       | (A/G)       |
| 7544        | CakSNP7544     | <i>Kabuli</i>    | Ca_Kabuli_Chr04              | 47428733                       | (A/G)       |
| 7545        | CakSNP7545     | <i>Kabuli</i>    | Ca_Kabuli_Chr04              | 47440207                       | (G/A)       |
| 7546        | CakSNP7546     | <i>Kabuli</i>    | Ca_Kabuli_Chr04              | 47450409                       | (C/T)       |
| 7547        | CakSNP7547     | <i>Kabuli</i>    | Ca_Kabuli_Chr04              | 47450479                       | (C/G)       |
| 7548        | CakSNP7548     | <i>Kabuli</i>    | Ca_Kabuli_Chr04              | 47562991                       | (A/T)       |
| 7549        | CakSNP7549     | <i>Kabuli</i>    | Ca_Kabuli_Chr04              | 47572228                       | (G/A)       |
| 7550        | CakSNP7550     | <i>Kabuli</i>    | Ca_Kabuli_Chr04              | 47572276                       | (C/T)       |
| 7551        | CakSNP7551     | <i>Kabuli</i>    | Ca_Kabuli_Chr04              | 47578508                       | (C/T)       |
| 7552        | CakSNP7552     | <i>Kabuli</i>    | Ca_Kabuli_Chr04              | 47578556                       | (T/G)       |
| 7553        | CakSNP7553     | <i>Kabuli</i>    | Ca_Kabuli_Chr04              | 47578655                       | (C/T)       |
| 7554        | CakSNP7554     | <i>Kabuli</i>    | Ca_Kabuli_Chr04              | 47578596                       | (C/T)       |
| 7555        | CakSNP7555     | <i>Kabuli</i>    | Ca_Kabuli_Chr04              | 47588760                       | (G/A)       |
| 7556        | CakSNP7556     | <i>Kabuli</i>    | Ca_Kabuli_Chr04              | 47612395                       | (C/A)       |
| 7557        | CakSNP7557     | <i>Kabuli</i>    | Ca_Kabuli_Chr04              | 47612396                       | (G/T)       |
| 7558        | CakSNP7558     | <i>Kabuli</i>    | Ca_Kabuli_Chr04              | 47615800                       | (G/C)       |
| 7559        | CakSNP7559     | <i>Kabuli</i>    | Ca_Kabuli_Chr04              | 47616120                       | (C/T)       |
| 7560        | CakSNP7560     | <i>Kabuli</i>    | Ca_Kabuli_Chr04              | 47616216                       | (A/G)       |
| 7561        | CakSNP7561     | <i>Kabuli</i>    | Ca_Kabuli_Chr04              | 47622112                       | (G/T)       |

| <b>S.N.</b> | <b>SNP IDs</b> | <b>Cultivars</b> | <b>Chromosomes/scaffolds</b> | <b>Physical positions (bp)</b> | <b>SNPs</b> |
|-------------|----------------|------------------|------------------------------|--------------------------------|-------------|
| 7562        | CakSNP7562     | <i>Kabuli</i>    | Ca_Kabuli_Chr04              | 47675446                       | (A/G)       |
| 7563        | CakSNP7563     | <i>Kabuli</i>    | Ca_Kabuli_Chr04              | 47675758                       | (A/T)       |
| 7564        | CakSNP7564     | <i>Kabuli</i>    | Ca_Kabuli_Chr04              | 47675860                       | (G/A)       |
| 7565        | CakSNP7565     | <i>Kabuli</i>    | Ca_Kabuli_Chr04              | 47697239                       | (C/T)       |
| 7566        | CakSNP7566     | <i>Kabuli</i>    | Ca_Kabuli_Chr04              | 47798580                       | (A/G)       |
| 7567        | CakSNP7567     | <i>Kabuli</i>    | Ca_Kabuli_Chr04              | 47798622                       | (G/A)       |
| 7568        | CakSNP7568     | <i>Kabuli</i>    | Ca_Kabuli_Chr04              | 47819943                       | (T/C)       |
| 7569        | CakSNP7569     | <i>Kabuli</i>    | Ca_Kabuli_Chr04              | 48008987                       | (T/C)       |
| 7570        | CakSNP7570     | <i>Kabuli</i>    | Ca_Kabuli_Chr04              | 48009201                       | (C/T)       |
| 7571        | CakSNP7571     | <i>Kabuli</i>    | Ca_Kabuli_Chr04              | 48011446                       | (A/G)       |
| 7572        | CakSNP7572     | <i>Kabuli</i>    | Ca_Kabuli_Chr04              | 48098570                       | (G/A)       |
| 7573        | CakSNP7573     | <i>Kabuli</i>    | Ca_Kabuli_Chr04              | 48098562                       | (G/A)       |
| 7574        | CakSNP7574     | <i>Kabuli</i>    | Ca_Kabuli_Chr04              | 48103202                       | (G/T)       |
| 7575        | CakSNP7575     | <i>Kabuli</i>    | Ca_Kabuli_Chr04              | 48103196                       | (G/A)       |
| 7576        | CakSNP7576     | <i>Kabuli</i>    | Ca_Kabuli_Chr04              | 48103159                       | (G/A)       |
| 7577        | CakSNP7577     | <i>Kabuli</i>    | Ca_Kabuli_Chr04              | 48103153                       | (A/C)       |
| 7578        | CakSNP7578     | <i>Kabuli</i>    | Ca_Kabuli_Chr04              | 48150277                       | (C/T)       |
| 7579        | CakSNP7579     | <i>Kabuli</i>    | Ca_Kabuli_Chr04              | 48150481                       | (T/C)       |
| 7580        | CakSNP7580     | <i>Kabuli</i>    | Ca_Kabuli_Chr04              | 48150480                       | (C/A)       |
| 7581        | CakSNP7581     | <i>Kabuli</i>    | Ca_Kabuli_Chr04              | 48150553                       | (A/G)       |
| 7582        | CakSNP7582     | <i>Kabuli</i>    | Ca_Kabuli_Chr04              | 48150641                       | (G/T)       |
| 7583        | CakSNP7583     | <i>Kabuli</i>    | Ca_Kabuli_Chr04              | 48238919                       | (C/T)       |
| 7584        | CakSNP7584     | <i>Kabuli</i>    | Ca_Kabuli_Chr04              | 48239048                       | (A/G)       |
| 7585        | CakSNP7585     | <i>Kabuli</i>    | Ca_Kabuli_Chr04              | 48263603                       | (G/A)       |
| 7586        | CakSNP7586     | <i>Kabuli</i>    | Ca_Kabuli_Chr04              | 48269138                       | (G/C)       |
| 7587        | CakSNP7587     | <i>Kabuli</i>    | Ca_Kabuli_Chr04              | 48275016                       | (C/T)       |
| 7588        | CakSNP7588     | <i>Kabuli</i>    | Ca_Kabuli_Chr04              | 48322502                       | (C/T)       |
| 7589        | CakSNP7589     | <i>Kabuli</i>    | Ca_Kabuli_Chr04              | 48322507                       | (C/T)       |
| 7590        | CakSNP7590     | <i>Kabuli</i>    | Ca_Kabuli_Chr04              | 48322633                       | (T/C)       |
| 7591        | CakSNP7591     | <i>Kabuli</i>    | Ca_Kabuli_Chr04              | 48331069                       | (C/A)       |
| 7592        | CakSNP7592     | <i>Kabuli</i>    | Ca_Kabuli_Chr04              | 48345604                       | (A/G)       |
| 7593        | CakSNP7593     | <i>Kabuli</i>    | Ca_Kabuli_Chr04              | 48345608                       | (G/T)       |
| 7594        | CakSNP7594     | <i>Kabuli</i>    | Ca_Kabuli_Chr04              | 48345655                       | (A/C)       |
| 7595        | CakSNP7595     | <i>Kabuli</i>    | Ca_Kabuli_Chr04              | 48345697                       | (C/G)       |
| 7596        | CakSNP7596     | <i>Kabuli</i>    | Ca_Kabuli_Chr04              | 48355358                       | (A/T)       |
| 7597        | CakSNP7597     | <i>Kabuli</i>    | Ca_Kabuli_Chr04              | 48355468                       | (G/T)       |
| 7598        | CakSNP7598     | <i>Kabuli</i>    | Ca_Kabuli_Chr04              | 48364170                       | (G/A)       |
| 7599        | CakSNP7599     | <i>Kabuli</i>    | Ca_Kabuli_Chr04              | 48365208                       | (C/A)       |

| <b>S.N.</b> | <b>SNP IDs</b> | <b>Cultivars</b> | <b>Chromosomes/scaffolds</b> | <b>Physical positions (bp)</b> | <b>SNPs</b> |
|-------------|----------------|------------------|------------------------------|--------------------------------|-------------|
| 7600        | CakSNP7600     | <i>Kabuli</i>    | Ca_Kabuli_Chr04              | 48365388                       | (G/A)       |
| 7601        | CakSNP7601     | <i>Kabuli</i>    | Ca_Kabuli_Chr04              | 48382666                       | (G/C)       |
| 7602        | CakSNP7602     | <i>Kabuli</i>    | Ca_Kabuli_Chr04              | 48464493                       | (T/C)       |
| 7603        | CakSNP7603     | <i>Kabuli</i>    | Ca_Kabuli_Chr04              | 48464434                       | (G/C)       |
| 7604        | CakSNP7604     | <i>Kabuli</i>    | Ca_Kabuli_Chr04              | 48470477                       | (A/G)       |
| 7605        | CakSNP7605     | <i>Kabuli</i>    | Ca_Kabuli_Chr04              | 48475447                       | (T/C)       |
| 7606        | CakSNP7606     | <i>Kabuli</i>    | Ca_Kabuli_Chr04              | 48475461                       | (G/A)       |
| 7607        | CakSNP7607     | <i>Kabuli</i>    | Ca_Kabuli_Chr04              | 48478018                       | (A/G)       |
| 7608        | CakSNP7608     | <i>Kabuli</i>    | Ca_Kabuli_Chr04              | 48478058                       | (T/C)       |
| 7609        | CakSNP7609     | <i>Kabuli</i>    | Ca_Kabuli_Chr04              | 48478303                       | (G/A)       |
| 7610        | CakSNP7610     | <i>Kabuli</i>    | Ca_Kabuli_Chr04              | 48478524                       | (C/T)       |
| 7611        | CakSNP7611     | <i>Kabuli</i>    | Ca_Kabuli_Chr04              | 48484453                       | (A/T)       |
| 7612        | CakSNP7612     | <i>Kabuli</i>    | Ca_Kabuli_Chr04              | 48497731                       | (A/C)       |
| 7613        | CakSNP7613     | <i>Kabuli</i>    | Ca_Kabuli_Chr04              | 48497725                       | (A/C)       |
| 7614        | CakSNP7614     | <i>Kabuli</i>    | Ca_Kabuli_Chr04              | 48497756                       | (A/G)       |
| 7615        | CakSNP7615     | <i>Kabuli</i>    | Ca_Kabuli_Chr04              | 48497765                       | (G/A)       |
| 7616        | CakSNP7616     | <i>Kabuli</i>    | Ca_Kabuli_Chr04              | 48497839                       | (G/A)       |
| 7617        | CakSNP7617     | <i>Kabuli</i>    | Ca_Kabuli_Chr04              | 48498133                       | (C/T)       |
| 7618        | CakSNP7618     | <i>Kabuli</i>    | Ca_Kabuli_Chr04              | 48498181                       | (G/C)       |
| 7619        | CakSNP7619     | <i>Kabuli</i>    | Ca_Kabuli_Chr04              | 48498166                       | (A/G)       |
| 7620        | CakSNP7620     | <i>Kabuli</i>    | Ca_Kabuli_Chr04              | 48498368                       | (C/T)       |
| 7621        | CakSNP7621     | <i>Kabuli</i>    | Ca_Kabuli_Chr04              | 48498334                       | (T/G)       |
| 7622        | CakSNP7622     | <i>Kabuli</i>    | Ca_Kabuli_Chr04              | 48498331                       | (T/A)       |
| 7623        | CakSNP7623     | <i>Kabuli</i>    | Ca_Kabuli_Chr04              | 48498312                       | (T/C)       |
| 7624        | CakSNP7624     | <i>Kabuli</i>    | Ca_Kabuli_Chr04              | 48501567                       | (G/T)       |
| 7625        | CakSNP7625     | <i>Kabuli</i>    | Ca_Kabuli_Chr04              | 48501618                       | (C/A)       |
| 7626        | CakSNP7626     | <i>Kabuli</i>    | Ca_Kabuli_Chr04              | 48501662                       | (A/T)       |
| 7627        | CakSNP7627     | <i>Kabuli</i>    | Ca_Kabuli_Chr04              | 48502554                       | (G/T)       |
| 7628        | CakSNP7628     | <i>Kabuli</i>    | Ca_Kabuli_Chr04              | 48502718                       | (G/C)       |
| 7629        | CakSNP7629     | <i>Kabuli</i>    | Ca_Kabuli_Chr04              | 48502714                       | (T/C)       |
| 7630        | CakSNP7630     | <i>Kabuli</i>    | Ca_Kabuli_Chr04              | 48502687                       | (G/A)       |
| 7631        | CakSNP7631     | <i>Kabuli</i>    | Ca_Kabuli_Chr04              | 48591482                       | (T/G)       |
| 7632        | CakSNP7632     | <i>Kabuli</i>    | Ca_Kabuli_Chr04              | 48591539                       | (T/C)       |
| 7633        | CakSNP7633     | <i>Kabuli</i>    | Ca_Kabuli_Chr04              | 48591578                       | (T/C)       |
| 7634        | CakSNP7634     | <i>Kabuli</i>    | Ca_Kabuli_Chr04              | 48591625                       | (G/T)       |
| 7635        | CakSNP7635     | <i>Kabuli</i>    | Ca_Kabuli_Chr04              | 48678278                       | (T/C)       |
| 7636        | CakSNP7636     | <i>Kabuli</i>    | Ca_Kabuli_Chr04              | 48678692                       | (T/C)       |
| 7637        | CakSNP7637     | <i>Kabuli</i>    | Ca_Kabuli_Chr04              | 48688766                       | (A/G)       |

| <b>S.N.</b> | <b>SNP IDs</b> | <b>Cultivars</b> | <b>Chromosomes/scaffolds</b> | <b>Physical positions (bp)</b> | <b>SNPs</b> |
|-------------|----------------|------------------|------------------------------|--------------------------------|-------------|
| 7638        | CakSNP7638     | <i>Kabuli</i>    | Ca_Kabuli_Chr04              | 48705815                       | (C/T)       |
| 7639        | CakSNP7639     | <i>Kabuli</i>    | Ca_Kabuli_Chr04              | 48705856                       | (A/T)       |
| 7640        | CakSNP7640     | <i>Kabuli</i>    | Ca_Kabuli_Chr04              | 48705957                       | (C/T)       |
| 7641        | CakSNP7641     | <i>Kabuli</i>    | Ca_Kabuli_Chr04              | 48714912                       | (G/A)       |
| 7642        | CakSNP7642     | <i>Kabuli</i>    | Ca_Kabuli_Chr04              | 48715028                       | (A/G)       |
| 7643        | CakSNP7643     | <i>Kabuli</i>    | Ca_Kabuli_Chr04              | 48720330                       | (C/T)       |
| 7644        | CakSNP7644     | <i>Kabuli</i>    | Ca_Kabuli_Chr04              | 48720266                       | (C/T)       |
| 7645        | CakSNP7645     | <i>Kabuli</i>    | Ca_Kabuli_Chr04              | 48784151                       | (T/G)       |
| 7646        | CakSNP7646     | <i>Kabuli</i>    | Ca_Kabuli_Chr04              | 48784176                       | (T/C)       |
| 7647        | CakSNP7647     | <i>Kabuli</i>    | Ca_Kabuli_Chr04              | 48784178                       | (C/G)       |
| 7648        | CakSNP7648     | <i>Kabuli</i>    | Ca_Kabuli_Chr04              | 48784179                       | (G/A)       |
| 7649        | CakSNP7649     | <i>Kabuli</i>    | Ca_Kabuli_Chr04              | 48784189                       | (A/T)       |
| 7650        | CakSNP7650     | <i>Kabuli</i>    | Ca_Kabuli_Chr04              | 48784202                       | (A/C)       |
| 7651        | CakSNP7651     | <i>Kabuli</i>    | Ca_Kabuli_Chr04              | 48784204                       | (G/C)       |
| 7652        | CakSNP7652     | <i>Kabuli</i>    | Ca_Kabuli_Chr04              | 48931112                       | (T/G)       |
| 7653        | CakSNP7653     | <i>Kabuli</i>    | Ca_Kabuli_Chr04              | 48931109                       | (A/G)       |
| 7654        | CakSNP7654     | <i>Kabuli</i>    | Ca_Kabuli_Chr04              | 48936643                       | (G/A)       |
| 7655        | CakSNP7655     | <i>Kabuli</i>    | Ca_Kabuli_Chr04              | 48936669                       | (G/A)       |
| 7656        | CakSNP7656     | <i>Kabuli</i>    | Ca_Kabuli_Chr04              | 48936710                       | (A/G)       |
| 7657        | CakSNP7657     | <i>Kabuli</i>    | Ca_Kabuli_Chr04              | 48936819                       | (C/T)       |
| 7658        | CakSNP7658     | <i>Kabuli</i>    | Ca_Kabuli_Chr04              | 48964200                       | (T/C)       |
| 7659        | CakSNP7659     | <i>Kabuli</i>    | Ca_Kabuli_Chr04              | 48964260                       | (G/C)       |
| 7660        | CakSNP7660     | <i>Kabuli</i>    | Ca_Kabuli_Chr04              | 48964248                       | (C/T)       |
| 7661        | CakSNP7661     | <i>Kabuli</i>    | Ca_Kabuli_Chr04              | 49012733                       | (T/A)       |
| 7662        | CakSNP7662     | <i>Kabuli</i>    | Ca_Kabuli_Chr04              | 49012756                       | (C/T)       |
| 7663        | CakSNP7663     | <i>Kabuli</i>    | Ca_Kabuli_Chr05              | 95087                          | (G/A)       |
| 7664        | CakSNP7664     | <i>Kabuli</i>    | Ca_Kabuli_Chr05              | 95253                          | (A/G)       |
| 7665        | CakSNP7665     | <i>Kabuli</i>    | Ca_Kabuli_Chr05              | 131558                         | (A/C)       |
| 7666        | CakSNP7666     | <i>Kabuli</i>    | Ca_Kabuli_Chr05              | 154084                         | (T/G)       |
| 7667        | CakSNP7667     | <i>Kabuli</i>    | Ca_Kabuli_Chr05              | 154095                         | (C/G)       |
| 7668        | CakSNP7668     | <i>Kabuli</i>    | Ca_Kabuli_Chr05              | 154097                         | (A/T)       |
| 7669        | CakSNP7669     | <i>Kabuli</i>    | Ca_Kabuli_Chr05              | 154162                         | (C/T)       |
| 7670        | CakSNP7670     | <i>Kabuli</i>    | Ca_Kabuli_Chr05              | 154128                         | (G/T)       |
| 7671        | CakSNP7671     | <i>Kabuli</i>    | Ca_Kabuli_Chr05              | 166222                         | (T/G)       |
| 7672        | CakSNP7672     | <i>Kabuli</i>    | Ca_Kabuli_Chr05              | 166217                         | (G/C)       |
| 7673        | CakSNP7673     | <i>Kabuli</i>    | Ca_Kabuli_Chr05              | 166216                         | (T/G)       |
| 7674        | CakSNP7674     | <i>Kabuli</i>    | Ca_Kabuli_Chr05              | 166341                         | (C/A)       |
| 7675        | CakSNP7675     | <i>Kabuli</i>    | Ca_Kabuli_Chr05              | 166381                         | (A/G)       |

| <b>S.N.</b> | <b>SNP IDs</b> | <b>Cultivars</b> | <b>Chromosomes/scaffolds</b> | <b>Physical positions (bp)</b> | <b>SNPs</b> |
|-------------|----------------|------------------|------------------------------|--------------------------------|-------------|
| 7676        | CakSNP7676     | <i>Kabuli</i>    | Ca_Kabuli_Chr05              | 210625                         | (T/C)       |
| 7677        | CakSNP7677     | <i>Kabuli</i>    | Ca_Kabuli_Chr05              | 210649                         | (C/A)       |
| 7678        | CakSNP7678     | <i>Kabuli</i>    | Ca_Kabuli_Chr05              | 222651                         | (A/C)       |
| 7679        | CakSNP7679     | <i>Kabuli</i>    | Ca_Kabuli_Chr05              | 222630                         | (A/G)       |
| 7680        | CakSNP7680     | <i>Kabuli</i>    | Ca_Kabuli_Chr05              | 222641                         | (C/T)       |
| 7681        | CakSNP7681     | <i>Kabuli</i>    | Ca_Kabuli_Chr05              | 222653                         | (A/C)       |
| 7682        | CakSNP7682     | <i>Kabuli</i>    | Ca_Kabuli_Chr05              | 222657                         | (G/A)       |
| 7683        | CakSNP7683     | <i>Kabuli</i>    | Ca_Kabuli_Chr05              | 223384                         | (C/G)       |
| 7684        | CakSNP7684     | <i>Kabuli</i>    | Ca_Kabuli_Chr05              | 234247                         | (T/C)       |
| 7685        | CakSNP7685     | <i>Kabuli</i>    | Ca_Kabuli_Chr05              | 234319                         | (T/A)       |
| 7686        | CakSNP7686     | <i>Kabuli</i>    | Ca_Kabuli_Chr05              | 234311                         | (T/A)       |
| 7687        | CakSNP7687     | <i>Kabuli</i>    | Ca_Kabuli_Chr05              | 234310                         | (G/A)       |
| 7688        | CakSNP7688     | <i>Kabuli</i>    | Ca_Kabuli_Chr05              | 234305                         | (T/A)       |
| 7689        | CakSNP7689     | <i>Kabuli</i>    | Ca_Kabuli_Chr05              | 234303                         | (C/A)       |
| 7690        | CakSNP7690     | <i>Kabuli</i>    | Ca_Kabuli_Chr05              | 234410                         | (A/C)       |
| 7691        | CakSNP7691     | <i>Kabuli</i>    | Ca_Kabuli_Chr05              | 245850                         | (T/G)       |
| 7692        | CakSNP7692     | <i>Kabuli</i>    | Ca_Kabuli_Chr05              | 245863                         | (A/T)       |
| 7693        | CakSNP7693     | <i>Kabuli</i>    | Ca_Kabuli_Chr05              | 245896                         | (A/T)       |
| 7694        | CakSNP7694     | <i>Kabuli</i>    | Ca_Kabuli_Chr05              | 246466                         | (A/T)       |
| 7695        | CakSNP7695     | <i>Kabuli</i>    | Ca_Kabuli_Chr05              | 246654                         | (A/G)       |
| 7696        | CakSNP7696     | <i>Kabuli</i>    | Ca_Kabuli_Chr05              | 256745                         | (G/A)       |
| 7697        | CakSNP7697     | <i>Kabuli</i>    | Ca_Kabuli_Chr05              | 272972                         | (T/A)       |
| 7698        | CakSNP7698     | <i>Kabuli</i>    | Ca_Kabuli_Chr05              | 277040                         | (G/A)       |
| 7699        | CakSNP7699     | <i>Kabuli</i>    | Ca_Kabuli_Chr05              | 277316                         | (T/A)       |
| 7700        | CakSNP7700     | <i>Kabuli</i>    | Ca_Kabuli_Chr05              | 343517                         | (C/T)       |
| 7701        | CakSNP7701     | <i>Kabuli</i>    | Ca_Kabuli_Chr05              | 353792                         | (T/A)       |
| 7702        | CakSNP7702     | <i>Kabuli</i>    | Ca_Kabuli_Chr05              | 438448                         | (C/A)       |
| 7703        | CakSNP7703     | <i>Kabuli</i>    | Ca_Kabuli_Chr05              | 438445                         | (C/A)       |
| 7704        | CakSNP7704     | <i>Kabuli</i>    | Ca_Kabuli_Chr05              | 438442                         | (T/C)       |
| 7705        | CakSNP7705     | <i>Kabuli</i>    | Ca_Kabuli_Chr05              | 443309                         | (A/T)       |
| 7706        | CakSNP7706     | <i>Kabuli</i>    | Ca_Kabuli_Chr05              | 469397                         | (G/A)       |
| 7707        | CakSNP7707     | <i>Kabuli</i>    | Ca_Kabuli_Chr05              | 805859                         | (C/T)       |
| 7708        | CakSNP7708     | <i>Kabuli</i>    | Ca_Kabuli_Chr05              | 805882                         | (A/T)       |
| 7709        | CakSNP7709     | <i>Kabuli</i>    | Ca_Kabuli_Chr05              | 805883                         | (G/T)       |
| 7710        | CakSNP7710     | <i>Kabuli</i>    | Ca_Kabuli_Chr05              | 805910                         | (G/A)       |
| 7711        | CakSNP7711     | <i>Kabuli</i>    | Ca_Kabuli_Chr05              | 870867                         | (A/G)       |
| 7712        | CakSNP7712     | <i>Kabuli</i>    | Ca_Kabuli_Chr05              | 870909                         | (G/A)       |
| 7713        | CakSNP7713     | <i>Kabuli</i>    | Ca_Kabuli_Chr05              | 925554                         | (T/C)       |

| <b>S.N.</b> | <b>SNP IDs</b> | <b>Cultivars</b> | <b>Chromosomes/scaffolds</b> | <b>Physical positions (bp)</b> | <b>SNPs</b> |
|-------------|----------------|------------------|------------------------------|--------------------------------|-------------|
| 7714        | CakSNP7714     | <i>Kabuli</i>    | Ca_Kabuli_Chr05              | 925493                         | (T/C)       |
| 7715        | CakSNP7715     | <i>Kabuli</i>    | Ca_Kabuli_Chr05              | 1141755                        | (C/T)       |
| 7716        | CakSNP7716     | <i>Kabuli</i>    | Ca_Kabuli_Chr05              | 1220867                        | (A/G)       |
| 7717        | CakSNP7717     | <i>Kabuli</i>    | Ca_Kabuli_Chr05              | 1252394                        | (G/A)       |
| 7718        | CakSNP7718     | <i>Kabuli</i>    | Ca_Kabuli_Chr05              | 1252388                        | (A/T)       |
| 7719        | CakSNP7719     | <i>Kabuli</i>    | Ca_Kabuli_Chr05              | 1270830                        | (T/C)       |
| 7720        | CakSNP7720     | <i>Kabuli</i>    | Ca_Kabuli_Chr05              | 1272581                        | (T/C)       |
| 7721        | CakSNP7721     | <i>Kabuli</i>    | Ca_Kabuli_Chr05              | 1280977                        | (T/G)       |
| 7722        | CakSNP7722     | <i>Kabuli</i>    | Ca_Kabuli_Chr05              | 1281006                        | (A/C)       |
| 7723        | CakSNP7723     | <i>Kabuli</i>    | Ca_Kabuli_Chr05              | 1281017                        | (G/A)       |
| 7724        | CakSNP7724     | <i>Kabuli</i>    | Ca_Kabuli_Chr05              | 1281021                        | (C/T)       |
| 7725        | CakSNP7725     | <i>Kabuli</i>    | Ca_Kabuli_Chr05              | 1534904                        | (C/T)       |
| 7726        | CakSNP7726     | <i>Kabuli</i>    | Ca_Kabuli_Chr05              | 1534901                        | (C/T)       |
| 7727        | CakSNP7727     | <i>Kabuli</i>    | Ca_Kabuli_Chr05              | 1534888                        | (T/C)       |
| 7728        | CakSNP7728     | <i>Kabuli</i>    | Ca_Kabuli_Chr05              | 2166586                        | (A/G)       |
| 7729        | CakSNP7729     | <i>Kabuli</i>    | Ca_Kabuli_Chr05              | 2519977                        | (C/T)       |
| 7730        | CakSNP7730     | <i>Kabuli</i>    | Ca_Kabuli_Chr05              | 2519949                        | (C/T)       |
| 7731        | CakSNP7731     | <i>Kabuli</i>    | Ca_Kabuli_Chr05              | 2519961                        | (G/A)       |
| 7732        | CakSNP7732     | <i>Kabuli</i>    | Ca_Kabuli_Chr05              | 2519976                        | (G/A)       |
| 7733        | CakSNP7733     | <i>Kabuli</i>    | Ca_Kabuli_Chr05              | 2520035                        | (G/A)       |
| 7734        | CakSNP7734     | <i>Kabuli</i>    | Ca_Kabuli_Chr05              | 2520058                        | (C/T)       |
| 7735        | CakSNP7735     | <i>Kabuli</i>    | Ca_Kabuli_Chr05              | 2520015                        | (C/G)       |
| 7736        | CakSNP7736     | <i>Kabuli</i>    | Ca_Kabuli_Chr05              | 2520049                        | (C/T)       |
| 7737        | CakSNP7737     | <i>Kabuli</i>    | Ca_Kabuli_Chr05              | 2520050                        | (G/C)       |
| 7738        | CakSNP7738     | <i>Kabuli</i>    | Ca_Kabuli_Chr05              | 2520051                        | (G/T)       |
| 7739        | CakSNP7739     | <i>Kabuli</i>    | Ca_Kabuli_Chr05              | 2520055                        | (C/T)       |
| 7740        | CakSNP7740     | <i>Kabuli</i>    | Ca_Kabuli_Chr05              | 2520068                        | (T/A)       |
| 7741        | CakSNP7741     | <i>Kabuli</i>    | Ca_Kabuli_Chr05              | 2520069                        | (C/T)       |
| 7742        | CakSNP7742     | <i>Kabuli</i>    | Ca_Kabuli_Chr05              | 2520094                        | (G/A)       |
| 7743        | CakSNP7743     | <i>Kabuli</i>    | Ca_Kabuli_Chr05              | 2520061                        | (C/T)       |
| 7744        | CakSNP7744     | <i>Kabuli</i>    | Ca_Kabuli_Chr05              | 2520093                        | (G/A)       |
| 7745        | CakSNP7745     | <i>Kabuli</i>    | Ca_Kabuli_Chr05              | 2520123                        | (A/G)       |
| 7746        | CakSNP7746     | <i>Kabuli</i>    | Ca_Kabuli_Chr05              | 2520114                        | (G/A)       |
| 7747        | CakSNP7747     | <i>Kabuli</i>    | Ca_Kabuli_Chr05              | 2520109                        | (G/A)       |
| 7748        | CakSNP7748     | <i>Kabuli</i>    | Ca_Kabuli_Chr05              | 2520101                        | (C/T)       |
| 7749        | CakSNP7749     | <i>Kabuli</i>    | Ca_Kabuli_Chr05              | 2613423                        | (T/G)       |
| 7750        | CakSNP7750     | <i>Kabuli</i>    | Ca_Kabuli_Chr05              | 2948530                        | (G/T)       |
| 7751        | CakSNP7751     | <i>Kabuli</i>    | Ca_Kabuli_Chr05              | 2948531                        | (T/C)       |

| <b>S.N.</b> | <b>SNP IDs</b> | <b>Cultivars</b> | <b>Chromosomes/scaffolds</b> | <b>Physical positions (bp)</b> | <b>SNPs</b> |
|-------------|----------------|------------------|------------------------------|--------------------------------|-------------|
| 7752        | CakSNP7752     | <i>Kabuli</i>    | Ca_Kabuli_Chr05              | 2948549                        | (C/A)       |
| 7753        | CakSNP7753     | <i>Kabuli</i>    | Ca_Kabuli_Chr05              | 2948592                        | (T/C)       |
| 7754        | CakSNP7754     | <i>Kabuli</i>    | Ca_Kabuli_Chr05              | 2948596                        | (C/T)       |
| 7755        | CakSNP7755     | <i>Kabuli</i>    | Ca_Kabuli_Chr05              | 2948616                        | (G/A)       |
| 7756        | CakSNP7756     | <i>Kabuli</i>    | Ca_Kabuli_Chr05              | 2948698                        | (G/A)       |
| 7757        | CakSNP7757     | <i>Kabuli</i>    | Ca_Kabuli_Chr05              | 2948977                        | (G/A)       |
| 7758        | CakSNP7758     | <i>Kabuli</i>    | Ca_Kabuli_Chr05              | 3007213                        | (A/G)       |
| 7759        | CakSNP7759     | <i>Kabuli</i>    | Ca_Kabuli_Chr05              | 3007316                        | (T/C)       |
| 7760        | CakSNP7760     | <i>Kabuli</i>    | Ca_Kabuli_Chr05              | 3040264                        | (G/T)       |
| 7761        | CakSNP7761     | <i>Kabuli</i>    | Ca_Kabuli_Chr05              | 3040948                        | (G/C)       |
| 7762        | CakSNP7762     | <i>Kabuli</i>    | Ca_Kabuli_Chr05              | 3159061                        | (G/A)       |
| 7763        | CakSNP7763     | <i>Kabuli</i>    | Ca_Kabuli_Chr05              | 3348291                        | (G/A)       |
| 7764        | CakSNP7764     | <i>Kabuli</i>    | Ca_Kabuli_Chr05              | 3348310                        | (A/G)       |
| 7765        | CakSNP7765     | <i>Kabuli</i>    | Ca_Kabuli_Chr05              | 3348366                        | (G/C)       |
| 7766        | CakSNP7766     | <i>Kabuli</i>    | Ca_Kabuli_Chr05              | 3353052                        | (A/G)       |
| 7767        | CakSNP7767     | <i>Kabuli</i>    | Ca_Kabuli_Chr05              | 4122395                        | (T/C)       |
| 7768        | CakSNP7768     | <i>Kabuli</i>    | Ca_Kabuli_Chr05              | 4122342                        | (T/C)       |
| 7769        | CakSNP7769     | <i>Kabuli</i>    | Ca_Kabuli_Chr05              | 5133644                        | (A/G)       |
| 7770        | CakSNP7770     | <i>Kabuli</i>    | Ca_Kabuli_Chr05              | 5205261                        | (T/G)       |
| 7771        | CakSNP7771     | <i>Kabuli</i>    | Ca_Kabuli_Chr05              | 5404261                        | (G/A)       |
| 7772        | CakSNP7772     | <i>Kabuli</i>    | Ca_Kabuli_Chr05              | 6190494                        | (T/C)       |
| 7773        | CakSNP7773     | <i>Kabuli</i>    | Ca_Kabuli_Chr05              | 6225426                        | (T/A)       |
| 7774        | CakSNP7774     | <i>Kabuli</i>    | Ca_Kabuli_Chr05              | 6225415                        | (G/C)       |
| 7775        | CakSNP7775     | <i>Kabuli</i>    | Ca_Kabuli_Chr05              | 6225410                        | (T/A)       |
| 7776        | CakSNP7776     | <i>Kabuli</i>    | Ca_Kabuli_Chr05              | 6290453                        | (G/A)       |
| 7777        | CakSNP7777     | <i>Kabuli</i>    | Ca_Kabuli_Chr05              | 6300337                        | (C/A)       |
| 7778        | CakSNP7778     | <i>Kabuli</i>    | Ca_Kabuli_Chr05              | 6300360                        | (C/A)       |
| 7779        | CakSNP7779     | <i>Kabuli</i>    | Ca_Kabuli_Chr05              | 6300502                        | (C/A)       |
| 7780        | CakSNP7780     | <i>Kabuli</i>    | Ca_Kabuli_Chr05              | 6316787                        | (C/T)       |
| 7781        | CakSNP7781     | <i>Kabuli</i>    | Ca_Kabuli_Chr05              | 6317014                        | (C/T)       |
| 7782        | CakSNP7782     | <i>Kabuli</i>    | Ca_Kabuli_Chr05              | 6931865                        | (A/G)       |
| 7783        | CakSNP7783     | <i>Kabuli</i>    | Ca_Kabuli_Chr05              | 7082295                        | (G/A)       |
| 7784        | CakSNP7784     | <i>Kabuli</i>    | Ca_Kabuli_Chr05              | 7082296                        | (T/G)       |
| 7785        | CakSNP7785     | <i>Kabuli</i>    | Ca_Kabuli_Chr05              | 7082301                        | (G/T)       |
| 7786        | CakSNP7786     | <i>Kabuli</i>    | Ca_Kabuli_Chr05              | 7278953                        | (C/T)       |
| 7787        | CakSNP7787     | <i>Kabuli</i>    | Ca_Kabuli_Chr05              | 7398246                        | (A/C)       |
| 7788        | CakSNP7788     | <i>Kabuli</i>    | Ca_Kabuli_Chr05              | 7425116                        | (C/T)       |
| 7789        | CakSNP7789     | <i>Kabuli</i>    | Ca_Kabuli_Chr05              | 7617914                        | (T/A)       |

| <b>S.N.</b> | <b>SNP IDs</b> | <b>Cultivars</b> | <b>Chromosomes/scaffolds</b> | <b>Physical positions (bp)</b> | <b>SNPs</b> |
|-------------|----------------|------------------|------------------------------|--------------------------------|-------------|
| 7790        | CakSNP7790     | <i>Kabuli</i>    | Ca_Kabuli_Chr05              | 7628097                        | (C/A)       |
| 7791        | CakSNP7791     | <i>Kabuli</i>    | Ca_Kabuli_Chr05              | 7641993                        | (T/C)       |
| 7792        | CakSNP7792     | <i>Kabuli</i>    | Ca_Kabuli_Chr05              | 7641925                        | (G/T)       |
| 7793        | CakSNP7793     | <i>Kabuli</i>    | Ca_Kabuli_Chr05              | 7641923                        | (A/G)       |
| 7794        | CakSNP7794     | <i>Kabuli</i>    | Ca_Kabuli_Chr05              | 7664421                        | (T/C)       |
| 7795        | CakSNP7795     | <i>Kabuli</i>    | Ca_Kabuli_Chr05              | 7775286                        | (C/A)       |
| 7796        | CakSNP7796     | <i>Kabuli</i>    | Ca_Kabuli_Chr05              | 7775290                        | (A/T)       |
| 7797        | CakSNP7797     | <i>Kabuli</i>    | Ca_Kabuli_Chr05              | 7775298                        | (A/T)       |
| 7798        | CakSNP7798     | <i>Kabuli</i>    | Ca_Kabuli_Chr05              | 7775329                        | (A/G)       |
| 7799        | CakSNP7799     | <i>Kabuli</i>    | Ca_Kabuli_Chr05              | 7775516                        | (A/G)       |
| 7800        | CakSNP7800     | <i>Kabuli</i>    | Ca_Kabuli_Chr05              | 7775497                        | (G/C)       |
| 7801        | CakSNP7801     | <i>Kabuli</i>    | Ca_Kabuli_Chr05              | 7775472                        | (G/A)       |
| 7802        | CakSNP7802     | <i>Kabuli</i>    | Ca_Kabuli_Chr05              | 7775456                        | (T/C)       |
| 7803        | CakSNP7803     | <i>Kabuli</i>    | Ca_Kabuli_Chr05              | 7775918                        | (C/T)       |
| 7804        | CakSNP7804     | <i>Kabuli</i>    | Ca_Kabuli_Chr05              | 7789021                        | (G/T)       |
| 7805        | CakSNP7805     | <i>Kabuli</i>    | Ca_Kabuli_Chr05              | 7789065                        | (A/G)       |
| 7806        | CakSNP7806     | <i>Kabuli</i>    | Ca_Kabuli_Chr05              | 7826336                        | (G/T)       |
| 7807        | CakSNP7807     | <i>Kabuli</i>    | Ca_Kabuli_Chr05              | 7826338                        | (T/G)       |
| 7808        | CakSNP7808     | <i>Kabuli</i>    | Ca_Kabuli_Chr05              | 7826362                        | (C/T)       |
| 7809        | CakSNP7809     | <i>Kabuli</i>    | Ca_Kabuli_Chr05              | 7826366                        | (A/G)       |
| 7810        | CakSNP7810     | <i>Kabuli</i>    | Ca_Kabuli_Chr05              | 7925356                        | (A/C)       |
| 7811        | CakSNP7811     | <i>Kabuli</i>    | Ca_Kabuli_Chr05              | 8263483                        | (A/G)       |
| 7812        | CakSNP7812     | <i>Kabuli</i>    | Ca_Kabuli_Chr05              | 8653283                        | (G/A)       |
| 7813        | CakSNP7813     | <i>Kabuli</i>    | Ca_Kabuli_Chr05              | 8676750                        | (T/G)       |
| 7814        | CakSNP7814     | <i>Kabuli</i>    | Ca_Kabuli_Chr05              | 8676807                        | (G/A)       |
| 7815        | CakSNP7815     | <i>Kabuli</i>    | Ca_Kabuli_Chr05              | 8676789                        | (T/C)       |
| 7816        | CakSNP7816     | <i>Kabuli</i>    | Ca_Kabuli_Chr05              | 8676771                        | (G/A)       |
| 7817        | CakSNP7817     | <i>Kabuli</i>    | Ca_Kabuli_Chr05              | 8946218                        | (G/A)       |
| 7818        | CakSNP7818     | <i>Kabuli</i>    | Ca_Kabuli_Chr05              | 9034100                        | (C/G)       |
| 7819        | CakSNP7819     | <i>Kabuli</i>    | Ca_Kabuli_Chr05              | 9076709                        | (C/T)       |
| 7820        | CakSNP7820     | <i>Kabuli</i>    | Ca_Kabuli_Chr05              | 9076712                        | (G/A)       |
| 7821        | CakSNP7821     | <i>Kabuli</i>    | Ca_Kabuli_Chr05              | 9076737                        | (C/A)       |
| 7822        | CakSNP7822     | <i>Kabuli</i>    | Ca_Kabuli_Chr05              | 9076738                        | (G/C)       |
| 7823        | CakSNP7823     | <i>Kabuli</i>    | Ca_Kabuli_Chr05              | 9076767                        | (C/A)       |
| 7824        | CakSNP7824     | <i>Kabuli</i>    | Ca_Kabuli_Chr05              | 9076824                        | (G/A)       |
| 7825        | CakSNP7825     | <i>Kabuli</i>    | Ca_Kabuli_Chr05              | 9076821                        | (G/T)       |
| 7826        | CakSNP7826     | <i>Kabuli</i>    | Ca_Kabuli_Chr05              | 9076809                        | (T/A)       |
| 7827        | CakSNP7827     | <i>Kabuli</i>    | Ca_Kabuli_Chr05              | 9077489                        | (T/C)       |



| <b>S.N.</b> | <b>SNP IDs</b> | <b>Cultivars</b> | <b>Chromosomes/scaffolds</b> | <b>Physical positions (bp)</b> | <b>SNPs</b> |
|-------------|----------------|------------------|------------------------------|--------------------------------|-------------|
| 7828        | CakSNP7828     | <i>Kabuli</i>    | Ca_Kabuli_Chr05              | 9519382                        | (C/A)       |
| 7829        | CakSNP7829     | <i>Kabuli</i>    | Ca_Kabuli_Chr05              | 9519390                        | (G/A)       |
| 7830        | CakSNP7830     | <i>Kabuli</i>    | Ca_Kabuli_Chr05              | 9609055                        | (T/C)       |
| 7831        | CakSNP7831     | <i>Kabuli</i>    | Ca_Kabuli_Chr05              | 9620998                        | (A/C)       |
| 7832        | CakSNP7832     | <i>Kabuli</i>    | Ca_Kabuli_Chr05              | 9728498                        | (A/T)       |
| 7833        | CakSNP7833     | <i>Kabuli</i>    | Ca_Kabuli_Chr05              | 9728609                        | (T/A)       |
| 7834        | CakSNP7834     | <i>Kabuli</i>    | Ca_Kabuli_Chr05              | 9728591                        | (A/G)       |
| 7835        | CakSNP7835     | <i>Kabuli</i>    | Ca_Kabuli_Chr05              | 9786213                        | (C/A)       |
| 7836        | CakSNP7836     | <i>Kabuli</i>    | Ca_Kabuli_Chr05              | 9868796                        | (T/C)       |
| 7837        | CakSNP7837     | <i>Kabuli</i>    | Ca_Kabuli_Chr05              | 9869005                        | (T/G)       |
| 7838        | CakSNP7838     | <i>Kabuli</i>    | Ca_Kabuli_Chr05              | 9961273                        | (T/C)       |
| 7839        | CakSNP7839     | <i>Kabuli</i>    | Ca_Kabuli_Chr05              | 9961396                        | (T/C)       |
| 7840        | CakSNP7840     | <i>Kabuli</i>    | Ca_Kabuli_Chr05              | 9961380                        | (C/T)       |
| 7841        | CakSNP7841     | <i>Kabuli</i>    | Ca_Kabuli_Chr05              | 9965880                        | (G/C)       |
| 7842        | CakSNP7842     | <i>Kabuli</i>    | Ca_Kabuli_Chr05              | 9965890                        | (T/C)       |
| 7843        | CakSNP7843     | <i>Kabuli</i>    | Ca_Kabuli_Chr05              | 9965913                        | (A/C)       |
| 7844        | CakSNP7844     | <i>Kabuli</i>    | Ca_Kabuli_Chr05              | 9965848                        | (T/C)       |
| 7845        | CakSNP7845     | <i>Kabuli</i>    | Ca_Kabuli_Chr05              | 9965846                        | (A/C)       |
| 7846        | CakSNP7846     | <i>Kabuli</i>    | Ca_Kabuli_Chr05              | 10004386                       | (G/T)       |
| 7847        | CakSNP7847     | <i>Kabuli</i>    | Ca_Kabuli_Chr05              | 10004427                       | (T/G)       |
| 7848        | CakSNP7848     | <i>Kabuli</i>    | Ca_Kabuli_Chr05              | 10004430                       | (T/G)       |
| 7849        | CakSNP7849     | <i>Kabuli</i>    | Ca_Kabuli_Chr05              | 10004451                       | (T/G)       |
| 7850        | CakSNP7850     | <i>Kabuli</i>    | Ca_Kabuli_Chr05              | 10054140                       | (G/C)       |
| 7851        | CakSNP7851     | <i>Kabuli</i>    | Ca_Kabuli_Chr05              | 10054146                       | (A/G)       |
| 7852        | CakSNP7852     | <i>Kabuli</i>    | Ca_Kabuli_Chr05              | 10054266                       | (T/C)       |
| 7853        | CakSNP7853     | <i>Kabuli</i>    | Ca_Kabuli_Chr05              | 10054213                       | (A/C)       |
| 7854        | CakSNP7854     | <i>Kabuli</i>    | Ca_Kabuli_Chr05              | 10072358                       | (G/A)       |
| 7855        | CakSNP7855     | <i>Kabuli</i>    | Ca_Kabuli_Chr05              | 10072403                       | (G/C)       |
| 7856        | CakSNP7856     | <i>Kabuli</i>    | Ca_Kabuli_Chr05              | 10154016                       | (A/G)       |
| 7857        | CakSNP7857     | <i>Kabuli</i>    | Ca_Kabuli_Chr05              | 10247223                       | (T/C)       |
| 7858        | CakSNP7858     | <i>Kabuli</i>    | Ca_Kabuli_Chr05              | 10247224                       | (T/A)       |
| 7859        | CakSNP7859     | <i>Kabuli</i>    | Ca_Kabuli_Chr05              | 10247233                       | (C/T)       |
| 7860        | CakSNP7860     | <i>Kabuli</i>    | Ca_Kabuli_Chr05              | 10247244                       | (C/T)       |
| 7861        | CakSNP7861     | <i>Kabuli</i>    | Ca_Kabuli_Chr05              | 10390882                       | (C/T)       |
| 7862        | CakSNP7862     | <i>Kabuli</i>    | Ca_Kabuli_Chr05              | 10406562                       | (C/A)       |
| 7863        | CakSNP7863     | <i>Kabuli</i>    | Ca_Kabuli_Chr05              | 10406602                       | (C/T)       |
| 7864        | CakSNP7864     | <i>Kabuli</i>    | Ca_Kabuli_Chr05              | 10406613                       | (C/T)       |
| 7865        | CakSNP7865     | <i>Kabuli</i>    | Ca_Kabuli_Chr05              | 10406636                       | (A/G)       |

| <b>S.N.</b> | <b>SNP IDs</b> | <b>Cultivars</b> | <b>Chromosomes/scaffolds</b> | <b>Physical positions (bp)</b> | <b>SNPs</b> |
|-------------|----------------|------------------|------------------------------|--------------------------------|-------------|
| 7866        | CakSNP7866     | <i>Kabuli</i>    | Ca_Kabuli_Chr05              | 10406649                       | (A/C)       |
| 7867        | CakSNP7867     | <i>Kabuli</i>    | Ca_Kabuli_Chr05              | 10406650                       | (A/G)       |
| 7868        | CakSNP7868     | <i>Kabuli</i>    | Ca_Kabuli_Chr05              | 10406754                       | (G/T)       |
| 7869        | CakSNP7869     | <i>Kabuli</i>    | Ca_Kabuli_Chr05              | 10510166                       | (G/A)       |
| 7870        | CakSNP7870     | <i>Kabuli</i>    | Ca_Kabuli_Chr05              | 10544823                       | (A/G)       |
| 7871        | CakSNP7871     | <i>Kabuli</i>    | Ca_Kabuli_Chr05              | 10546944                       | (A/T)       |
| 7872        | CakSNP7872     | <i>Kabuli</i>    | Ca_Kabuli_Chr05              | 10675252                       | (A/G)       |
| 7873        | CakSNP7873     | <i>Kabuli</i>    | Ca_Kabuli_Chr05              | 10675279                       | (C/G)       |
| 7874        | CakSNP7874     | <i>Kabuli</i>    | Ca_Kabuli_Chr05              | 10675294                       | (A/G)       |
| 7875        | CakSNP7875     | <i>Kabuli</i>    | Ca_Kabuli_Chr05              | 10769765                       | (C/T)       |
| 7876        | CakSNP7876     | <i>Kabuli</i>    | Ca_Kabuli_Chr05              | 10832275                       | (T/C)       |
| 7877        | CakSNP7877     | <i>Kabuli</i>    | Ca_Kabuli_Chr05              | 10858490                       | (C/T)       |
| 7878        | CakSNP7878     | <i>Kabuli</i>    | Ca_Kabuli_Chr05              | 10918368                       | (A/G)       |
| 7879        | CakSNP7879     | <i>Kabuli</i>    | Ca_Kabuli_Chr05              | 10919246                       | (C/G)       |
| 7880        | CakSNP7880     | <i>Kabuli</i>    | Ca_Kabuli_Chr05              | 11230617                       | (C/G)       |
| 7881        | CakSNP7881     | <i>Kabuli</i>    | Ca_Kabuli_Chr05              | 11230627                       | (A/G)       |
| 7882        | CakSNP7882     | <i>Kabuli</i>    | Ca_Kabuli_Chr05              | 11230648                       | (G/A)       |
| 7883        | CakSNP7883     | <i>Kabuli</i>    | Ca_Kabuli_Chr05              | 11230671                       | (T/C)       |
| 7884        | CakSNP7884     | <i>Kabuli</i>    | Ca_Kabuli_Chr05              | 11263571                       | (C/G)       |
| 7885        | CakSNP7885     | <i>Kabuli</i>    | Ca_Kabuli_Chr05              | 11263574                       | (C/A)       |
| 7886        | CakSNP7886     | <i>Kabuli</i>    | Ca_Kabuli_Chr05              | 11317487                       | (C/T)       |
| 7887        | CakSNP7887     | <i>Kabuli</i>    | Ca_Kabuli_Chr05              | 11317502                       | (C/A)       |
| 7888        | CakSNP7888     | <i>Kabuli</i>    | Ca_Kabuli_Chr05              | 11317534                       | (C/A)       |
| 7889        | CakSNP7889     | <i>Kabuli</i>    | Ca_Kabuli_Chr05              | 11385780                       | (A/C)       |
| 7890        | CakSNP7890     | <i>Kabuli</i>    | Ca_Kabuli_Chr05              | 11385874                       | (A/G)       |
| 7891        | CakSNP7891     | <i>Kabuli</i>    | Ca_Kabuli_Chr05              | 11765841                       | (C/T)       |
| 7892        | CakSNP7892     | <i>Kabuli</i>    | Ca_Kabuli_Chr05              | 11777112                       | (C/T)       |
| 7893        | CakSNP7893     | <i>Kabuli</i>    | Ca_Kabuli_Chr05              | 11807822                       | (G/T)       |
| 7894        | CakSNP7894     | <i>Kabuli</i>    | Ca_Kabuli_Chr05              | 11807842                       | (T/C)       |
| 7895        | CakSNP7895     | <i>Kabuli</i>    | Ca_Kabuli_Chr05              | 11845515                       | (C/T)       |
| 7896        | CakSNP7896     | <i>Kabuli</i>    | Ca_Kabuli_Chr05              | 11853090                       | (C/T)       |
| 7897        | CakSNP7897     | <i>Kabuli</i>    | Ca_Kabuli_Chr05              | 11864959                       | (T/C)       |
| 7898        | CakSNP7898     | <i>Kabuli</i>    | Ca_Kabuli_Chr05              | 12044714                       | (A/G)       |
| 7899        | CakSNP7899     | <i>Kabuli</i>    | Ca_Kabuli_Chr05              | 12157678                       | (A/G)       |
| 7900        | CakSNP7900     | <i>Kabuli</i>    | Ca_Kabuli_Chr05              | 12157683                       | (T/C)       |
| 7901        | CakSNP7901     | <i>Kabuli</i>    | Ca_Kabuli_Chr05              | 12157688                       | (C/T)       |
| 7902        | CakSNP7902     | <i>Kabuli</i>    | Ca_Kabuli_Chr05              | 12157706                       | (G/A)       |
| 7903        | CakSNP7903     | <i>Kabuli</i>    | Ca_Kabuli_Chr05              | 12157707                       | (C/T)       |

| <b>S.N.</b> | <b>SNP IDs</b> | <b>Cultivars</b> | <b>Chromosomes/scaffolds</b> | <b>Physical positions (bp)</b> | <b>SNPs</b> |
|-------------|----------------|------------------|------------------------------|--------------------------------|-------------|
| 7904        | CakSNP7904     | <i>Kabuli</i>    | Ca_Kabuli_Chr05              | 12157710                       | (A/C)       |
| 7905        | CakSNP7905     | <i>Kabuli</i>    | Ca_Kabuli_Chr05              | 12157742                       | (C/A)       |
| 7906        | CakSNP7906     | <i>Kabuli</i>    | Ca_Kabuli_Chr05              | 12157699                       | (G/T)       |
| 7907        | CakSNP7907     | <i>Kabuli</i>    | Ca_Kabuli_Chr05              | 12162108                       | (T/G)       |
| 7908        | CakSNP7908     | <i>Kabuli</i>    | Ca_Kabuli_Chr05              | 12162156                       | (T/C)       |
| 7909        | CakSNP7909     | <i>Kabuli</i>    | Ca_Kabuli_Chr05              | 12162160                       | (G/T)       |
| 7910        | CakSNP7910     | <i>Kabuli</i>    | Ca_Kabuli_Chr05              | 12162164                       | (C/G)       |
| 7911        | CakSNP7911     | <i>Kabuli</i>    | Ca_Kabuli_Chr05              | 12198014                       | (G/A)       |
| 7912        | CakSNP7912     | <i>Kabuli</i>    | Ca_Kabuli_Chr05              | 12204521                       | (T/A)       |
| 7913        | CakSNP7913     | <i>Kabuli</i>    | Ca_Kabuli_Chr05              | 12204588                       | (A/G)       |
| 7914        | CakSNP7914     | <i>Kabuli</i>    | Ca_Kabuli_Chr05              | 12427931                       | (C/T)       |
| 7915        | CakSNP7915     | <i>Kabuli</i>    | Ca_Kabuli_Chr05              | 12427940                       | (T/A)       |
| 7916        | CakSNP7916     | <i>Kabuli</i>    | Ca_Kabuli_Chr05              | 12427970                       | (T/C)       |
| 7917        | CakSNP7917     | <i>Kabuli</i>    | Ca_Kabuli_Chr05              | 12427969                       | (T/C)       |
| 7918        | CakSNP7918     | <i>Kabuli</i>    | Ca_Kabuli_Chr05              | 12427966                       | (T/C)       |
| 7919        | CakSNP7919     | <i>Kabuli</i>    | Ca_Kabuli_Chr05              | 12428027                       | (G/A)       |
| 7920        | CakSNP7920     | <i>Kabuli</i>    | Ca_Kabuli_Chr05              | 12428121                       | (A/T)       |
| 7921        | CakSNP7921     | <i>Kabuli</i>    | Ca_Kabuli_Chr05              | 12428120                       | (G/A)       |
| 7922        | CakSNP7922     | <i>Kabuli</i>    | Ca_Kabuli_Chr05              | 12428102                       | (A/G)       |
| 7923        | CakSNP7923     | <i>Kabuli</i>    | Ca_Kabuli_Chr05              | 12480948                       | (T/G)       |
| 7924        | CakSNP7924     | <i>Kabuli</i>    | Ca_Kabuli_Chr05              | 12553469                       | (A/C)       |
| 7925        | CakSNP7925     | <i>Kabuli</i>    | Ca_Kabuli_Chr05              | 12553470                       | (G/C)       |
| 7926        | CakSNP7926     | <i>Kabuli</i>    | Ca_Kabuli_Chr05              | 12590330                       | (A/G)       |
| 7927        | CakSNP7927     | <i>Kabuli</i>    | Ca_Kabuli_Chr05              | 12590361                       | (T/C)       |
| 7928        | CakSNP7928     | <i>Kabuli</i>    | Ca_Kabuli_Chr05              | 12590478                       | (T/C)       |
| 7929        | CakSNP7929     | <i>Kabuli</i>    | Ca_Kabuli_Chr05              | 12662138                       | (G/T)       |
| 7930        | CakSNP7930     | <i>Kabuli</i>    | Ca_Kabuli_Chr05              | 13982000                       | (T/G)       |
| 7931        | CakSNP7931     | <i>Kabuli</i>    | Ca_Kabuli_Chr05              | 13982041                       | (C/T)       |
| 7932        | CakSNP7932     | <i>Kabuli</i>    | Ca_Kabuli_Chr05              | 15401230                       | (C/T)       |
| 7933        | CakSNP7933     | <i>Kabuli</i>    | Ca_Kabuli_Chr05              | 15500782                       | (G/C)       |
| 7934        | CakSNP7934     | <i>Kabuli</i>    | Ca_Kabuli_Chr05              | 15548719                       | (G/A)       |
| 7935        | CakSNP7935     | <i>Kabuli</i>    | Ca_Kabuli_Chr05              | 15952395                       | (C/T)       |
| 7936        | CakSNP7936     | <i>Kabuli</i>    | Ca_Kabuli_Chr05              | 16227319                       | (G/T)       |
| 7937        | CakSNP7937     | <i>Kabuli</i>    | Ca_Kabuli_Chr05              | 16227321                       | (C/T)       |
| 7938        | CakSNP7938     | <i>Kabuli</i>    | Ca_Kabuli_Chr05              | 16227353                       | (G/A)       |
| 7939        | CakSNP7939     | <i>Kabuli</i>    | Ca_Kabuli_Chr05              | 16227395                       | (G/A)       |
| 7940        | CakSNP7940     | <i>Kabuli</i>    | Ca_Kabuli_Chr05              | 16227401                       | (G/A)       |
| 7941        | CakSNP7941     | <i>Kabuli</i>    | Ca_Kabuli_Chr05              | 16227408                       | (C/T)       |

| <b>S.N.</b> | <b>SNP IDs</b> | <b>Cultivars</b> | <b>Chromosomes/scaffolds</b> | <b>Physical positions (bp)</b> | <b>SNPs</b> |
|-------------|----------------|------------------|------------------------------|--------------------------------|-------------|
| 7942        | CakSNP7942     | <i>Kabuli</i>    | Ca_Kabuli_Chr05              | 16426578                       | (G/A)       |
| 7943        | CakSNP7943     | <i>Kabuli</i>    | Ca_Kabuli_Chr05              | 16426575                       | (G/A)       |
| 7944        | CakSNP7944     | <i>Kabuli</i>    | Ca_Kabuli_Chr05              | 16426549                       | (G/A)       |
| 7945        | CakSNP7945     | <i>Kabuli</i>    | Ca_Kabuli_Chr05              | 16426662                       | (C/T)       |
| 7946        | CakSNP7946     | <i>Kabuli</i>    | Ca_Kabuli_Chr05              | 16426657                       | (C/T)       |
| 7947        | CakSNP7947     | <i>Kabuli</i>    | Ca_Kabuli_Chr05              | 16426656                       | (A/G)       |
| 7948        | CakSNP7948     | <i>Kabuli</i>    | Ca_Kabuli_Chr05              | 16426642                       | (A/G)       |
| 7949        | CakSNP7949     | <i>Kabuli</i>    | Ca_Kabuli_Chr05              | 16593880                       | (A/G)       |
| 7950        | CakSNP7950     | <i>Kabuli</i>    | Ca_Kabuli_Chr05              | 16751536                       | (C/T)       |
| 7951        | CakSNP7951     | <i>Kabuli</i>    | Ca_Kabuli_Chr05              | 16767134                       | (C/T)       |
| 7952        | CakSNP7952     | <i>Kabuli</i>    | Ca_Kabuli_Chr05              | 16821406                       | (A/G)       |
| 7953        | CakSNP7953     | <i>Kabuli</i>    | Ca_Kabuli_Chr05              | 16929903                       | (C/G)       |
| 7954        | CakSNP7954     | <i>Kabuli</i>    | Ca_Kabuli_Chr05              | 16929897                       | (A/G)       |
| 7955        | CakSNP7955     | <i>Kabuli</i>    | Ca_Kabuli_Chr05              | 17037918                       | (G/T)       |
| 7956        | CakSNP7956     | <i>Kabuli</i>    | Ca_Kabuli_Chr05              | 17044340                       | (G/A)       |
| 7957        | CakSNP7957     | <i>Kabuli</i>    | Ca_Kabuli_Chr05              | 17044338                       | (G/A)       |
| 7958        | CakSNP7958     | <i>Kabuli</i>    | Ca_Kabuli_Chr05              | 17044332                       | (A/G)       |
| 7959        | CakSNP7959     | <i>Kabuli</i>    | Ca_Kabuli_Chr05              | 17045235                       | (T/C)       |
| 7960        | CakSNP7960     | <i>Kabuli</i>    | Ca_Kabuli_Chr05              | 17045244                       | (A/G)       |
| 7961        | CakSNP7961     | <i>Kabuli</i>    | Ca_Kabuli_Chr05              | 17045485                       | (T/G)       |
| 7962        | CakSNP7962     | <i>Kabuli</i>    | Ca_Kabuli_Chr05              | 17239612                       | (T/C)       |
| 7963        | CakSNP7963     | <i>Kabuli</i>    | Ca_Kabuli_Chr05              | 17494714                       | (A/G)       |
| 7964        | CakSNP7964     | <i>Kabuli</i>    | Ca_Kabuli_Chr05              | 17494702                       | (G/A)       |
| 7965        | CakSNP7965     | <i>Kabuli</i>    | Ca_Kabuli_Chr05              | 17494700                       | (T/C)       |
| 7966        | CakSNP7966     | <i>Kabuli</i>    | Ca_Kabuli_Chr05              | 17494697                       | (C/T)       |
| 7967        | CakSNP7967     | <i>Kabuli</i>    | Ca_Kabuli_Chr05              | 17494672                       | (C/T)       |
| 7968        | CakSNP7968     | <i>Kabuli</i>    | Ca_Kabuli_Chr05              | 17494699                       | (C/A)       |
| 7969        | CakSNP7969     | <i>Kabuli</i>    | Ca_Kabuli_Chr05              | 17494705                       | (A/T)       |
| 7970        | CakSNP7970     | <i>Kabuli</i>    | Ca_Kabuli_Chr05              | 17494710                       | (C/T)       |
| 7971        | CakSNP7971     | <i>Kabuli</i>    | Ca_Kabuli_Chr05              | 17494731                       | (A/T)       |
| 7972        | CakSNP7972     | <i>Kabuli</i>    | Ca_Kabuli_Chr05              | 18044808                       | (C/G)       |
| 7973        | CakSNP7973     | <i>Kabuli</i>    | Ca_Kabuli_Chr05              | 18664706                       | (C/T)       |
| 7974        | CakSNP7974     | <i>Kabuli</i>    | Ca_Kabuli_Chr05              | 18667782                       | (T/C)       |
| 7975        | CakSNP7975     | <i>Kabuli</i>    | Ca_Kabuli_Chr05              | 18667775                       | (T/C)       |
| 7976        | CakSNP7976     | <i>Kabuli</i>    | Ca_Kabuli_Chr05              | 18682788                       | (A/C)       |
| 7977        | CakSNP7977     | <i>Kabuli</i>    | Ca_Kabuli_Chr05              | 18682792                       | (T/C)       |
| 7978        | CakSNP7978     | <i>Kabuli</i>    | Ca_Kabuli_Chr05              | 18682793                       | (A/G)       |
| 7979        | CakSNP7979     | <i>Kabuli</i>    | Ca_Kabuli_Chr05              | 18682794                       | (A/G)       |

| <b>S.N.</b> | <b>SNP IDs</b> | <b>Cultivars</b> | <b>Chromosomes/scaffolds</b> | <b>Physical positions (bp)</b> | <b>SNPs</b> |
|-------------|----------------|------------------|------------------------------|--------------------------------|-------------|
| 7980        | CakSNP7980     | <i>Kabuli</i>    | Ca_Kabuli_Chr05              | 18682812                       | (A/G)       |
| 7981        | CakSNP7981     | <i>Kabuli</i>    | Ca_Kabuli_Chr05              | 18682814                       | (T/A)       |
| 7982        | CakSNP7982     | <i>Kabuli</i>    | Ca_Kabuli_Chr05              | 18682822                       | (A/G)       |
| 7983        | CakSNP7983     | <i>Kabuli</i>    | Ca_Kabuli_Chr05              | 18682827                       | (C/G)       |
| 7984        | CakSNP7984     | <i>Kabuli</i>    | Ca_Kabuli_Chr05              | 18682830                       | (G/A)       |
| 7985        | CakSNP7985     | <i>Kabuli</i>    | Ca_Kabuli_Chr05              | 18684334                       | (C/T)       |
| 7986        | CakSNP7986     | <i>Kabuli</i>    | Ca_Kabuli_Chr05              | 18971085                       | (G/A)       |
| 7987        | CakSNP7987     | <i>Kabuli</i>    | Ca_Kabuli_Chr05              | 18971088                       | (C/A)       |
| 7988        | CakSNP7988     | <i>Kabuli</i>    | Ca_Kabuli_Chr05              | 19421820                       | (C/T)       |
| 7989        | CakSNP7989     | <i>Kabuli</i>    | Ca_Kabuli_Chr05              | 19421868                       | (C/T)       |
| 7990        | CakSNP7990     | <i>Kabuli</i>    | Ca_Kabuli_Chr05              | 19423387                       | (G/A)       |
| 7991        | CakSNP7991     | <i>Kabuli</i>    | Ca_Kabuli_Chr05              | 19423357                       | (C/T)       |
| 7992        | CakSNP7992     | <i>Kabuli</i>    | Ca_Kabuli_Chr05              | 19828124                       | (G/A)       |
| 7993        | CakSNP7993     | <i>Kabuli</i>    | Ca_Kabuli_Chr05              | 19828151                       | (C/A)       |
| 7994        | CakSNP7994     | <i>Kabuli</i>    | Ca_Kabuli_Chr05              | 19828163                       | (C/T)       |
| 7995        | CakSNP7995     | <i>Kabuli</i>    | Ca_Kabuli_Chr05              | 19828166                       | (C/T)       |
| 7996        | CakSNP7996     | <i>Kabuli</i>    | Ca_Kabuli_Chr05              | 19828167                       | (A/C)       |
| 7997        | CakSNP7997     | <i>Kabuli</i>    | Ca_Kabuli_Chr05              | 19828226                       | (G/A)       |
| 7998        | CakSNP7998     | <i>Kabuli</i>    | Ca_Kabuli_Chr05              | 19828190                       | (T/C)       |
| 7999        | CakSNP7999     | <i>Kabuli</i>    | Ca_Kabuli_Chr05              | 19828184                       | (C/A)       |
| 8000        | CakSNP8000     | <i>Kabuli</i>    | Ca_Kabuli_Chr05              | 19828172                       | (T/G)       |
| 8001        | CakSNP8001     | <i>Kabuli</i>    | Ca_Kabuli_Chr05              | 19828144                       | (A/G)       |
| 8002        | CakSNP8002     | <i>Kabuli</i>    | Ca_Kabuli_Chr05              | 19884132                       | (C/T)       |
| 8003        | CakSNP8003     | <i>Kabuli</i>    | Ca_Kabuli_Chr05              | 19884124                       | (A/G)       |
| 8004        | CakSNP8004     | <i>Kabuli</i>    | Ca_Kabuli_Chr05              | 20008545                       | (C/T)       |
| 8005        | CakSNP8005     | <i>Kabuli</i>    | Ca_Kabuli_Chr05              | 20031711                       | (A/G)       |
| 8006        | CakSNP8006     | <i>Kabuli</i>    | Ca_Kabuli_Chr05              | 20354352                       | (T/C)       |
| 8007        | CakSNP8007     | <i>Kabuli</i>    | Ca_Kabuli_Chr05              | 20359674                       | (G/A)       |
| 8008        | CakSNP8008     | <i>Kabuli</i>    | Ca_Kabuli_Chr05              | 20460857                       | (G/A)       |
| 8009        | CakSNP8009     | <i>Kabuli</i>    | Ca_Kabuli_Chr05              | 20460859                       | (T/G)       |
| 8010        | CakSNP8010     | <i>Kabuli</i>    | Ca_Kabuli_Chr05              | 20546402                       | (T/C)       |
| 8011        | CakSNP8011     | <i>Kabuli</i>    | Ca_Kabuli_Chr05              | 20546385                       | (T/G)       |
| 8012        | CakSNP8012     | <i>Kabuli</i>    | Ca_Kabuli_Chr05              | 20644984                       | (C/A)       |
| 8013        | CakSNP8013     | <i>Kabuli</i>    | Ca_Kabuli_Chr05              | 20834519                       | (A/G)       |
| 8014        | CakSNP8014     | <i>Kabuli</i>    | Ca_Kabuli_Chr05              | 21163371                       | (G/A)       |
| 8015        | CakSNP8015     | <i>Kabuli</i>    | Ca_Kabuli_Chr05              | 21385948                       | (T/C)       |
| 8016        | CakSNP8016     | <i>Kabuli</i>    | Ca_Kabuli_Chr05              | 21495583                       | (C/A)       |
| 8017        | CakSNP8017     | <i>Kabuli</i>    | Ca_Kabuli_Chr05              | 21495631                       | (C/T)       |

| <b>S.N.</b> | <b>SNP IDs</b> | <b>Cultivars</b> | <b>Chromosomes/scaffolds</b> | <b>Physical positions (bp)</b> | <b>SNPs</b> |
|-------------|----------------|------------------|------------------------------|--------------------------------|-------------|
| 8018        | CakSNP8018     | <i>Kabuli</i>    | Ca_Kabuli_Chr05              | 21495672                       | (G/A)       |
| 8019        | CakSNP8019     | <i>Kabuli</i>    | Ca_Kabuli_Chr05              | 21495707                       | (A/G)       |
| 8020        | CakSNP8020     | <i>Kabuli</i>    | Ca_Kabuli_Chr05              | 21495679                       | (G/A)       |
| 8021        | CakSNP8021     | <i>Kabuli</i>    | Ca_Kabuli_Chr05              | 21495674                       | (G/A)       |
| 8022        | CakSNP8022     | <i>Kabuli</i>    | Ca_Kabuli_Chr05              | 21769327                       | (G/A)       |
| 8023        | CakSNP8023     | <i>Kabuli</i>    | Ca_Kabuli_Chr05              | 21769419                       | (C/G)       |
| 8024        | CakSNP8024     | <i>Kabuli</i>    | Ca_Kabuli_Chr05              | 21769794                       | (A/C)       |
| 8025        | CakSNP8025     | <i>Kabuli</i>    | Ca_Kabuli_Chr05              | 22027215                       | (T/C)       |
| 8026        | CakSNP8026     | <i>Kabuli</i>    | Ca_Kabuli_Chr05              | 22027257                       | (G/T)       |
| 8027        | CakSNP8027     | <i>Kabuli</i>    | Ca_Kabuli_Chr05              | 22027265                       | (A/T)       |
| 8028        | CakSNP8028     | <i>Kabuli</i>    | Ca_Kabuli_Chr05              | 22029684                       | (C/A)       |
| 8029        | CakSNP8029     | <i>Kabuli</i>    | Ca_Kabuli_Chr05              | 22029686                       | (G/A)       |
| 8030        | CakSNP8030     | <i>Kabuli</i>    | Ca_Kabuli_Chr05              | 22029761                       | (C/T)       |
| 8031        | CakSNP8031     | <i>Kabuli</i>    | Ca_Kabuli_Chr05              | 22065518                       | (C/T)       |
| 8032        | CakSNP8032     | <i>Kabuli</i>    | Ca_Kabuli_Chr05              | 22065859                       | (G/A)       |
| 8033        | CakSNP8033     | <i>Kabuli</i>    | Ca_Kabuli_Chr05              | 22066034                       | (A/T)       |
| 8034        | CakSNP8034     | <i>Kabuli</i>    | Ca_Kabuli_Chr05              | 22116961                       | (T/G)       |
| 8035        | CakSNP8035     | <i>Kabuli</i>    | Ca_Kabuli_Chr05              | 22188341                       | (C/T)       |
| 8036        | CakSNP8036     | <i>Kabuli</i>    | Ca_Kabuli_Chr05              | 22188318                       | (C/T)       |
| 8037        | CakSNP8037     | <i>Kabuli</i>    | Ca_Kabuli_Chr05              | 22296731                       | (G/A)       |
| 8038        | CakSNP8038     | <i>Kabuli</i>    | Ca_Kabuli_Chr05              | 22296728                       | (G/T)       |
| 8039        | CakSNP8039     | <i>Kabuli</i>    | Ca_Kabuli_Chr05              | 22302350                       | (A/C)       |
| 8040        | CakSNP8040     | <i>Kabuli</i>    | Ca_Kabuli_Chr05              | 22344868                       | (A/G)       |
| 8041        | CakSNP8041     | <i>Kabuli</i>    | Ca_Kabuli_Chr05              | 22445954                       | (T/C)       |
| 8042        | CakSNP8042     | <i>Kabuli</i>    | Ca_Kabuli_Chr05              | 22679380                       | (C/A)       |
| 8043        | CakSNP8043     | <i>Kabuli</i>    | Ca_Kabuli_Chr05              | 23039312                       | (C/T)       |
| 8044        | CakSNP8044     | <i>Kabuli</i>    | Ca_Kabuli_Chr05              | 23049683                       | (C/A)       |
| 8045        | CakSNP8045     | <i>Kabuli</i>    | Ca_Kabuli_Chr05              | 23157899                       | (A/G)       |
| 8046        | CakSNP8046     | <i>Kabuli</i>    | Ca_Kabuli_Chr05              | 23161492                       | (A/T)       |
| 8047        | CakSNP8047     | <i>Kabuli</i>    | Ca_Kabuli_Chr05              | 23261964                       | (A/G)       |
| 8048        | CakSNP8048     | <i>Kabuli</i>    | Ca_Kabuli_Chr05              | 23262114                       | (C/A)       |
| 8049        | CakSNP8049     | <i>Kabuli</i>    | Ca_Kabuli_Chr05              | 23262264                       | (C/A)       |
| 8050        | CakSNP8050     | <i>Kabuli</i>    | Ca_Kabuli_Chr05              | 23323538                       | (G/A)       |
| 8051        | CakSNP8051     | <i>Kabuli</i>    | Ca_Kabuli_Chr05              | 23323520                       | (C/A)       |
| 8052        | CakSNP8052     | <i>Kabuli</i>    | Ca_Kabuli_Chr05              | 23323514                       | (C/A)       |
| 8053        | CakSNP8053     | <i>Kabuli</i>    | Ca_Kabuli_Chr05              | 23323479                       | (A/T)       |
| 8054        | CakSNP8054     | <i>Kabuli</i>    | Ca_Kabuli_Chr05              | 23323478                       | (A/T)       |
| 8055        | CakSNP8055     | <i>Kabuli</i>    | Ca_Kabuli_Chr05              | 23440293                       | (C/T)       |

| <b>S.N.</b> | <b>SNP IDs</b> | <b>Cultivars</b> | <b>Chromosomes/scaffolds</b> | <b>Physical positions (bp)</b> | <b>SNPs</b> |
|-------------|----------------|------------------|------------------------------|--------------------------------|-------------|
| 8056        | CakSNP8056     | <i>Kabuli</i>    | Ca_Kabuli_Chr05              | 23449048                       | (T/C)       |
| 8057        | CakSNP8057     | <i>Kabuli</i>    | Ca_Kabuli_Chr05              | 23449134                       | (A/C)       |
| 8058        | CakSNP8058     | <i>Kabuli</i>    | Ca_Kabuli_Chr05              | 23449127                       | (C/A)       |
| 8059        | CakSNP8059     | <i>Kabuli</i>    | Ca_Kabuli_Chr05              | 23562595                       | (G/A)       |
| 8060        | CakSNP8060     | <i>Kabuli</i>    | Ca_Kabuli_Chr05              | 23562827                       | (G/A)       |
| 8061        | CakSNP8061     | <i>Kabuli</i>    | Ca_Kabuli_Chr05              | 23674814                       | (C/G)       |
| 8062        | CakSNP8062     | <i>Kabuli</i>    | Ca_Kabuli_Chr05              | 23674815                       | (C/T)       |
| 8063        | CakSNP8063     | <i>Kabuli</i>    | Ca_Kabuli_Chr05              | 23674845                       | (G/C)       |
| 8064        | CakSNP8064     | <i>Kabuli</i>    | Ca_Kabuli_Chr05              | 23783140                       | (T/C)       |
| 8065        | CakSNP8065     | <i>Kabuli</i>    | Ca_Kabuli_Chr05              | 23783156                       | (C/A)       |
| 8066        | CakSNP8066     | <i>Kabuli</i>    | Ca_Kabuli_Chr05              | 23783157                       | (G/C)       |
| 8067        | CakSNP8067     | <i>Kabuli</i>    | Ca_Kabuli_Chr05              | 23783188                       | (G/A)       |
| 8068        | CakSNP8068     | <i>Kabuli</i>    | Ca_Kabuli_Chr05              | 23783195                       | (C/G)       |
| 8069        | CakSNP8069     | <i>Kabuli</i>    | Ca_Kabuli_Chr05              | 23783254                       | (A/G)       |
| 8070        | CakSNP8070     | <i>Kabuli</i>    | Ca_Kabuli_Chr05              | 23783252                       | (T/A)       |
| 8071        | CakSNP8071     | <i>Kabuli</i>    | Ca_Kabuli_Chr05              | 23884909                       | (C/T)       |
| 8072        | CakSNP8072     | <i>Kabuli</i>    | Ca_Kabuli_Chr05              | 23884936                       | (G/A)       |
| 8073        | CakSNP8073     | <i>Kabuli</i>    | Ca_Kabuli_Chr05              | 23930933                       | (C/T)       |
| 8074        | CakSNP8074     | <i>Kabuli</i>    | Ca_Kabuli_Chr05              | 23930988                       | (G/A)       |
| 8075        | CakSNP8075     | <i>Kabuli</i>    | Ca_Kabuli_Chr05              | 23932354                       | (C/T)       |
| 8076        | CakSNP8076     | <i>Kabuli</i>    | Ca_Kabuli_Chr05              | 23934198                       | (G/T)       |
| 8077        | CakSNP8077     | <i>Kabuli</i>    | Ca_Kabuli_Chr05              | 24059182                       | (C/G)       |
| 8078        | CakSNP8078     | <i>Kabuli</i>    | Ca_Kabuli_Chr05              | 24090533                       | (C/T)       |
| 8079        | CakSNP8079     | <i>Kabuli</i>    | Ca_Kabuli_Chr05              | 24090523                       | (A/C)       |
| 8080        | CakSNP8080     | <i>Kabuli</i>    | Ca_Kabuli_Chr05              | 24090515                       | (A/C)       |
| 8081        | CakSNP8081     | <i>Kabuli</i>    | Ca_Kabuli_Chr05              | 24090749                       | (A/C)       |
| 8082        | CakSNP8082     | <i>Kabuli</i>    | Ca_Kabuli_Chr05              | 24097823                       | (T/C)       |
| 8083        | CakSNP8083     | <i>Kabuli</i>    | Ca_Kabuli_Chr05              | 24153061                       | (G/C)       |
| 8084        | CakSNP8084     | <i>Kabuli</i>    | Ca_Kabuli_Chr05              | 24153205                       | (T/C)       |
| 8085        | CakSNP8085     | <i>Kabuli</i>    | Ca_Kabuli_Chr05              | 24153273                       | (T/C)       |
| 8086        | CakSNP8086     | <i>Kabuli</i>    | Ca_Kabuli_Chr05              | 24153202                       | (A/C)       |
| 8087        | CakSNP8087     | <i>Kabuli</i>    | Ca_Kabuli_Chr05              | 24153199                       | (C/T)       |
| 8088        | CakSNP8088     | <i>Kabuli</i>    | Ca_Kabuli_Chr05              | 24166103                       | (C/T)       |
| 8089        | CakSNP8089     | <i>Kabuli</i>    | Ca_Kabuli_Chr05              | 24166095                       | (G/A)       |
| 8090        | CakSNP8090     | <i>Kabuli</i>    | Ca_Kabuli_Chr05              | 24166093                       | (A/G)       |
| 8091        | CakSNP8091     | <i>Kabuli</i>    | Ca_Kabuli_Chr05              | 24166046                       | (G/A)       |
| 8092        | CakSNP8092     | <i>Kabuli</i>    | Ca_Kabuli_Chr05              | 24166047                       | (C/T)       |
| 8093        | CakSNP8093     | <i>Kabuli</i>    | Ca_Kabuli_Chr05              | 24166082                       | (G/A)       |

| <b>S.N.</b> | <b>SNP IDs</b> | <b>Cultivars</b> | <b>Chromosomes/scaffolds</b> | <b>Physical positions (bp)</b> | <b>SNPs</b> |
|-------------|----------------|------------------|------------------------------|--------------------------------|-------------|
| 8094        | CakSNP8094     | <i>Kabuli</i>    | Ca_Kabuli_Chr05              | 24181232                       | (C/A)       |
| 8095        | CakSNP8095     | <i>Kabuli</i>    | Ca_Kabuli_Chr05              | 24181228                       | (C/A)       |
| 8096        | CakSNP8096     | <i>Kabuli</i>    | Ca_Kabuli_Chr05              | 24245312                       | (C/A)       |
| 8097        | CakSNP8097     | <i>Kabuli</i>    | Ca_Kabuli_Chr05              | 24245308                       | (C/A)       |
| 8098        | CakSNP8098     | <i>Kabuli</i>    | Ca_Kabuli_Chr05              | 24346350                       | (A/T)       |
| 8099        | CakSNP8099     | <i>Kabuli</i>    | Ca_Kabuli_Chr05              | 24576960                       | (C/T)       |
| 8100        | CakSNP8100     | <i>Kabuli</i>    | Ca_Kabuli_Chr05              | 24576970                       | (A/G)       |
| 8101        | CakSNP8101     | <i>Kabuli</i>    | Ca_Kabuli_Chr05              | 24576993                       | (T/G)       |
| 8102        | CakSNP8102     | <i>Kabuli</i>    | Ca_Kabuli_Chr05              | 24596227                       | (T/C)       |
| 8103        | CakSNP8103     | <i>Kabuli</i>    | Ca_Kabuli_Chr05              | 24596257                       | (C/T)       |
| 8104        | CakSNP8104     | <i>Kabuli</i>    | Ca_Kabuli_Chr05              | 24596269                       | (G/A)       |
| 8105        | CakSNP8105     | <i>Kabuli</i>    | Ca_Kabuli_Chr05              | 24605438                       | (A/C)       |
| 8106        | CakSNP8106     | <i>Kabuli</i>    | Ca_Kabuli_Chr05              | 24843015                       | (G/T)       |
| 8107        | CakSNP8107     | <i>Kabuli</i>    | Ca_Kabuli_Chr05              | 25003171                       | (C/T)       |
| 8108        | CakSNP8108     | <i>Kabuli</i>    | Ca_Kabuli_Chr05              | 25006110                       | (A/C)       |
| 8109        | CakSNP8109     | <i>Kabuli</i>    | Ca_Kabuli_Chr05              | 25006123                       | (C/T)       |
| 8110        | CakSNP8110     | <i>Kabuli</i>    | Ca_Kabuli_Chr05              | 25184089                       | (T/C)       |
| 8111        | CakSNP8111     | <i>Kabuli</i>    | Ca_Kabuli_Chr05              | 25184133                       | (G/A)       |
| 8112        | CakSNP8112     | <i>Kabuli</i>    | Ca_Kabuli_Chr05              | 25399115                       | (T/G)       |
| 8113        | CakSNP8113     | <i>Kabuli</i>    | Ca_Kabuli_Chr05              | 25400604                       | (A/G)       |
| 8114        | CakSNP8114     | <i>Kabuli</i>    | Ca_Kabuli_Chr05              | 25474110                       | (A/C)       |
| 8115        | CakSNP8115     | <i>Kabuli</i>    | Ca_Kabuli_Chr05              | 25474105                       | (C/T)       |
| 8116        | CakSNP8116     | <i>Kabuli</i>    | Ca_Kabuli_Chr05              | 25474093                       | (G/C)       |
| 8117        | CakSNP8117     | <i>Kabuli</i>    | Ca_Kabuli_Chr05              | 25474089                       | (C/A)       |
| 8118        | CakSNP8118     | <i>Kabuli</i>    | Ca_Kabuli_Chr05              | 25597077                       | (A/G)       |
| 8119        | CakSNP8119     | <i>Kabuli</i>    | Ca_Kabuli_Chr05              | 25678975                       | (G/T)       |
| 8120        | CakSNP8120     | <i>Kabuli</i>    | Ca_Kabuli_Chr05              | 25697487                       | (C/G)       |
| 8121        | CakSNP8121     | <i>Kabuli</i>    | Ca_Kabuli_Chr05              | 25805020                       | (A/G)       |
| 8122        | CakSNP8122     | <i>Kabuli</i>    | Ca_Kabuli_Chr05              | 26025243                       | (C/T)       |
| 8123        | CakSNP8123     | <i>Kabuli</i>    | Ca_Kabuli_Chr05              | 26025282                       | (A/G)       |
| 8124        | CakSNP8124     | <i>Kabuli</i>    | Ca_Kabuli_Chr05              | 26025356                       | (A/T)       |
| 8125        | CakSNP8125     | <i>Kabuli</i>    | Ca_Kabuli_Chr05              | 26027313                       | (C/A)       |
| 8126        | CakSNP8126     | <i>Kabuli</i>    | Ca_Kabuli_Chr05              | 26095084                       | (T/G)       |
| 8127        | CakSNP8127     | <i>Kabuli</i>    | Ca_Kabuli_Chr05              | 26124240                       | (T/C)       |
| 8128        | CakSNP8128     | <i>Kabuli</i>    | Ca_Kabuli_Chr05              | 26191896                       | (T/C)       |
| 8129        | CakSNP8129     | <i>Kabuli</i>    | Ca_Kabuli_Chr05              | 26194579                       | (A/G)       |
| 8130        | CakSNP8130     | <i>Kabuli</i>    | Ca_Kabuli_Chr05              | 26238764                       | (T/G)       |
| 8131        | CakSNP8131     | <i>Kabuli</i>    | Ca_Kabuli_Chr05              | 26238752                       | (A/T)       |



| <b>S.N.</b> | <b>SNP IDs</b> | <b>Cultivars</b> | <b>Chromosomes/scaffolds</b> | <b>Physical positions (bp)</b> | <b>SNPs</b> |
|-------------|----------------|------------------|------------------------------|--------------------------------|-------------|
| 8132        | CakSNP8132     | <i>Kabuli</i>    | Ca_Kabuli_Chr05              | 26238748                       | (A/T)       |
| 8133        | CakSNP8133     | <i>Kabuli</i>    | Ca_Kabuli_Chr05              | 26238741                       | (G/T)       |
| 8134        | CakSNP8134     | <i>Kabuli</i>    | Ca_Kabuli_Chr05              | 26238739                       | (C/T)       |
| 8135        | CakSNP8135     | <i>Kabuli</i>    | Ca_Kabuli_Chr05              | 26384636                       | (C/G)       |
| 8136        | CakSNP8136     | <i>Kabuli</i>    | Ca_Kabuli_Chr05              | 26467869                       | (A/C)       |
| 8137        | CakSNP8137     | <i>Kabuli</i>    | Ca_Kabuli_Chr05              | 26474910                       | (A/C)       |
| 8138        | CakSNP8138     | <i>Kabuli</i>    | Ca_Kabuli_Chr05              | 26475067                       | (T/C)       |
| 8139        | CakSNP8139     | <i>Kabuli</i>    | Ca_Kabuli_Chr05              | 26477751                       | (A/T)       |
| 8140        | CakSNP8140     | <i>Kabuli</i>    | Ca_Kabuli_Chr05              | 26494631                       | (A/G)       |
| 8141        | CakSNP8141     | <i>Kabuli</i>    | Ca_Kabuli_Chr05              | 26494778                       | (T/C)       |
| 8142        | CakSNP8142     | <i>Kabuli</i>    | Ca_Kabuli_Chr05              | 26494769                       | (T/C)       |
| 8143        | CakSNP8143     | <i>Kabuli</i>    | Ca_Kabuli_Chr05              | 26496197                       | (A/G)       |
| 8144        | CakSNP8144     | <i>Kabuli</i>    | Ca_Kabuli_Chr05              | 26558406                       | (A/G)       |
| 8145        | CakSNP8145     | <i>Kabuli</i>    | Ca_Kabuli_Chr05              | 26558366                       | (A/G)       |
| 8146        | CakSNP8146     | <i>Kabuli</i>    | Ca_Kabuli_Chr05              | 26558363                       | (C/G)       |
| 8147        | CakSNP8147     | <i>Kabuli</i>    | Ca_Kabuli_Chr05              | 26558357                       | (G/A)       |
| 8148        | CakSNP8148     | <i>Kabuli</i>    | Ca_Kabuli_Chr05              | 26558356                       | (G/T)       |
| 8149        | CakSNP8149     | <i>Kabuli</i>    | Ca_Kabuli_Chr05              | 26569400                       | (G/C)       |
| 8150        | CakSNP8150     | <i>Kabuli</i>    | Ca_Kabuli_Chr05              | 26609014                       | (T/C)       |
| 8151        | CakSNP8151     | <i>Kabuli</i>    | Ca_Kabuli_Chr05              | 26608993                       | (A/G)       |
| 8152        | CakSNP8152     | <i>Kabuli</i>    | Ca_Kabuli_Chr05              | 26621093                       | (C/G)       |
| 8153        | CakSNP8153     | <i>Kabuli</i>    | Ca_Kabuli_Chr05              | 26626861                       | (A/G)       |
| 8154        | CakSNP8154     | <i>Kabuli</i>    | Ca_Kabuli_Chr05              | 26626855                       | (T/G)       |
| 8155        | CakSNP8155     | <i>Kabuli</i>    | Ca_Kabuli_Chr05              | 26638041                       | (G/A)       |
| 8156        | CakSNP8156     | <i>Kabuli</i>    | Ca_Kabuli_Chr05              | 26638042                       | (C/T)       |
| 8157        | CakSNP8157     | <i>Kabuli</i>    | Ca_Kabuli_Chr05              | 26638080                       | (A/G)       |
| 8158        | CakSNP8158     | <i>Kabuli</i>    | Ca_Kabuli_Chr05              | 26638126                       | (C/T)       |
| 8159        | CakSNP8159     | <i>Kabuli</i>    | Ca_Kabuli_Chr05              | 26638118                       | (C/T)       |
| 8160        | CakSNP8160     | <i>Kabuli</i>    | Ca_Kabuli_Chr05              | 26679836                       | (C/T)       |
| 8161        | CakSNP8161     | <i>Kabuli</i>    | Ca_Kabuli_Chr05              | 26696390                       | (G/A)       |
| 8162        | CakSNP8162     | <i>Kabuli</i>    | Ca_Kabuli_Chr05              | 26696412                       | (C/A)       |
| 8163        | CakSNP8163     | <i>Kabuli</i>    | Ca_Kabuli_Chr05              | 26696455                       | (G/A)       |
| 8164        | CakSNP8164     | <i>Kabuli</i>    | Ca_Kabuli_Chr05              | 26696547                       | (C/T)       |
| 8165        | CakSNP8165     | <i>Kabuli</i>    | Ca_Kabuli_Chr05              | 26696533                       | (C/T)       |
| 8166        | CakSNP8166     | <i>Kabuli</i>    | Ca_Kabuli_Chr05              | 26696494                       | (G/A)       |
| 8167        | CakSNP8167     | <i>Kabuli</i>    | Ca_Kabuli_Chr05              | 26696578                       | (G/A)       |
| 8168        | CakSNP8168     | <i>Kabuli</i>    | Ca_Kabuli_Chr05              | 26696602                       | (C/T)       |
| 8169        | CakSNP8169     | <i>Kabuli</i>    | Ca_Kabuli_Chr05              | 26696620                       | (C/T)       |

| <b>S.N.</b> | <b>SNP IDs</b> | <b>Cultivars</b> | <b>Chromosomes/scaffolds</b> | <b>Physical positions (bp)</b> | <b>SNPs</b> |
|-------------|----------------|------------------|------------------------------|--------------------------------|-------------|
| 8170        | CakSNP8170     | <i>Kabuli</i>    | Ca_Kabuli_Chr05              | 26696624                       | (G/A)       |
| 8171        | CakSNP8171     | <i>Kabuli</i>    | Ca_Kabuli_Chr05              | 26785140                       | (G/A)       |
| 8172        | CakSNP8172     | <i>Kabuli</i>    | Ca_Kabuli_Chr05              | 26785226                       | (C/A)       |
| 8173        | CakSNP8173     | <i>Kabuli</i>    | Ca_Kabuli_Chr05              | 26997335                       | (T/G)       |
| 8174        | CakSNP8174     | <i>Kabuli</i>    | Ca_Kabuli_Chr05              | 26999793                       | (C/T)       |
| 8175        | CakSNP8175     | <i>Kabuli</i>    | Ca_Kabuli_Chr05              | 27000127                       | (C/G)       |
| 8176        | CakSNP8176     | <i>Kabuli</i>    | Ca_Kabuli_Chr05              | 27000104                       | (C/A)       |
| 8177        | CakSNP8177     | <i>Kabuli</i>    | Ca_Kabuli_Chr05              | 27000278                       | (T/A)       |
| 8178        | CakSNP8178     | <i>Kabuli</i>    | Ca_Kabuli_Chr05              | 27000280                       | (T/G)       |
| 8179        | CakSNP8179     | <i>Kabuli</i>    | Ca_Kabuli_Chr05              | 27025766                       | (A/G)       |
| 8180        | CakSNP8180     | <i>Kabuli</i>    | Ca_Kabuli_Chr05              | 27025752                       | (A/C)       |
| 8181        | CakSNP8181     | <i>Kabuli</i>    | Ca_Kabuli_Chr05              | 27042679                       | (G/A)       |
| 8182        | CakSNP8182     | <i>Kabuli</i>    | Ca_Kabuli_Chr05              | 27117953                       | (A/G)       |
| 8183        | CakSNP8183     | <i>Kabuli</i>    | Ca_Kabuli_Chr05              | 27150550                       | (A/G)       |
| 8184        | CakSNP8184     | <i>Kabuli</i>    | Ca_Kabuli_Chr05              | 27230515                       | (T/A)       |
| 8185        | CakSNP8185     | <i>Kabuli</i>    | Ca_Kabuli_Chr05              | 27230514                       | (A/G)       |
| 8186        | CakSNP8186     | <i>Kabuli</i>    | Ca_Kabuli_Chr05              | 27231394                       | (T/C)       |
| 8187        | CakSNP8187     | <i>Kabuli</i>    | Ca_Kabuli_Chr05              | 27231641                       | (T/A)       |
| 8188        | CakSNP8188     | <i>Kabuli</i>    | Ca_Kabuli_Chr05              | 27232304                       | (T/A)       |
| 8189        | CakSNP8189     | <i>Kabuli</i>    | Ca_Kabuli_Chr05              | 27234806                       | (G/A)       |
| 8190        | CakSNP8190     | <i>Kabuli</i>    | Ca_Kabuli_Chr05              | 27235002                       | (T/G)       |
| 8191        | CakSNP8191     | <i>Kabuli</i>    | Ca_Kabuli_Chr05              | 27328552                       | (G/A)       |
| 8192        | CakSNP8192     | <i>Kabuli</i>    | Ca_Kabuli_Chr05              | 27328737                       | (G/T)       |
| 8193        | CakSNP8193     | <i>Kabuli</i>    | Ca_Kabuli_Chr05              | 27334056                       | (A/C)       |
| 8194        | CakSNP8194     | <i>Kabuli</i>    | Ca_Kabuli_Chr05              | 27334057                       | (G/C)       |
| 8195        | CakSNP8195     | <i>Kabuli</i>    | Ca_Kabuli_Chr05              | 27334061                       | (G/C)       |
| 8196        | CakSNP8196     | <i>Kabuli</i>    | Ca_Kabuli_Chr05              | 27349210                       | (T/A)       |
| 8197        | CakSNP8197     | <i>Kabuli</i>    | Ca_Kabuli_Chr05              | 27349237                       | (C/T)       |
| 8198        | CakSNP8198     | <i>Kabuli</i>    | Ca_Kabuli_Chr05              | 27361515                       | (C/T)       |
| 8199        | CakSNP8199     | <i>Kabuli</i>    | Ca_Kabuli_Chr05              | 27361579                       | (T/G)       |
| 8200        | CakSNP8200     | <i>Kabuli</i>    | Ca_Kabuli_Chr05              | 27362517                       | (C/G)       |
| 8201        | CakSNP8201     | <i>Kabuli</i>    | Ca_Kabuli_Chr05              | 27362570                       | (G/T)       |
| 8202        | CakSNP8202     | <i>Kabuli</i>    | Ca_Kabuli_Chr05              | 27362573                       | (A/G)       |
| 8203        | CakSNP8203     | <i>Kabuli</i>    | Ca_Kabuli_Chr05              | 27362584                       | (T/G)       |
| 8204        | CakSNP8204     | <i>Kabuli</i>    | Ca_Kabuli_Chr05              | 27452484                       | (C/G)       |
| 8205        | CakSNP8205     | <i>Kabuli</i>    | Ca_Kabuli_Chr05              | 27516054                       | (T/A)       |
| 8206        | CakSNP8206     | <i>Kabuli</i>    | Ca_Kabuli_Chr05              | 27552106                       | (A/C)       |
| 8207        | CakSNP8207     | <i>Kabuli</i>    | Ca_Kabuli_Chr05              | 27555637                       | (T/G)       |

| <b>S.N.</b> | <b>SNP IDs</b> | <b>Cultivars</b> | <b>Chromosomes/scaffolds</b> | <b>Physical positions (bp)</b> | <b>SNPs</b> |
|-------------|----------------|------------------|------------------------------|--------------------------------|-------------|
| 8208        | CakSNP8208     | <i>Kabuli</i>    | Ca_Kabuli_Chr05              | 27568101                       | (T/G)       |
| 8209        | CakSNP8209     | <i>Kabuli</i>    | Ca_Kabuli_Chr05              | 27568095                       | (C/A)       |
| 8210        | CakSNP8210     | <i>Kabuli</i>    | Ca_Kabuli_Chr05              | 27568064                       | (A/C)       |
| 8211        | CakSNP8211     | <i>Kabuli</i>    | Ca_Kabuli_Chr05              | 27568059                       | (C/T)       |
| 8212        | CakSNP8212     | <i>Kabuli</i>    | Ca_Kabuli_Chr05              | 27568028                       | (A/T)       |
| 8213        | CakSNP8213     | <i>Kabuli</i>    | Ca_Kabuli_Chr05              | 27568033                       | (G/A)       |
| 8214        | CakSNP8214     | <i>Kabuli</i>    | Ca_Kabuli_Chr05              | 27568082                       | (G/A)       |
| 8215        | CakSNP8215     | <i>Kabuli</i>    | Ca_Kabuli_Chr05              | 27568097                       | (G/A)       |
| 8216        | CakSNP8216     | <i>Kabuli</i>    | Ca_Kabuli_Chr05              | 27568098                       | (C/T)       |
| 8217        | CakSNP8217     | <i>Kabuli</i>    | Ca_Kabuli_Chr05              | 27568118                       | (A/G)       |
| 8218        | CakSNP8218     | <i>Kabuli</i>    | Ca_Kabuli_Chr05              | 27568133                       | (G/T)       |
| 8219        | CakSNP8219     | <i>Kabuli</i>    | Ca_Kabuli_Chr05              | 27568081                       | (G/C)       |
| 8220        | CakSNP8220     | <i>Kabuli</i>    | Ca_Kabuli_Chr05              | 27568107                       | (C/G)       |
| 8221        | CakSNP8221     | <i>Kabuli</i>    | Ca_Kabuli_Chr05              | 27568156                       | (C/G)       |
| 8222        | CakSNP8222     | <i>Kabuli</i>    | Ca_Kabuli_Chr05              | 27568141                       | (C/T)       |
| 8223        | CakSNP8223     | <i>Kabuli</i>    | Ca_Kabuli_Chr05              | 27568180                       | (C/T)       |
| 8224        | CakSNP8224     | <i>Kabuli</i>    | Ca_Kabuli_Chr05              | 27568176                       | (T/C)       |
| 8225        | CakSNP8225     | <i>Kabuli</i>    | Ca_Kabuli_Chr05              | 27579347                       | (C/T)       |
| 8226        | CakSNP8226     | <i>Kabuli</i>    | Ca_Kabuli_Chr05              | 27605037                       | (A/T)       |
| 8227        | CakSNP8227     | <i>Kabuli</i>    | Ca_Kabuli_Chr05              | 27605063                       | (T/A)       |
| 8228        | CakSNP8228     | <i>Kabuli</i>    | Ca_Kabuli_Chr05              | 27605081                       | (C/T)       |
| 8229        | CakSNP8229     | <i>Kabuli</i>    | Ca_Kabuli_Chr05              | 27605095                       | (G/C)       |
| 8230        | CakSNP8230     | <i>Kabuli</i>    | Ca_Kabuli_Chr05              | 27692816                       | (C/T)       |
| 8231        | CakSNP8231     | <i>Kabuli</i>    | Ca_Kabuli_Chr05              | 27692818                       | (C/T)       |
| 8232        | CakSNP8232     | <i>Kabuli</i>    | Ca_Kabuli_Chr05              | 27692822                       | (C/T)       |
| 8233        | CakSNP8233     | <i>Kabuli</i>    | Ca_Kabuli_Chr05              | 27692823                       | (A/T)       |
| 8234        | CakSNP8234     | <i>Kabuli</i>    | Ca_Kabuli_Chr05              | 27692831                       | (A/T)       |
| 8235        | CakSNP8235     | <i>Kabuli</i>    | Ca_Kabuli_Chr05              | 27694205                       | (C/A)       |
| 8236        | CakSNP8236     | <i>Kabuli</i>    | Ca_Kabuli_Chr05              | 27750155                       | (C/T)       |
| 8237        | CakSNP8237     | <i>Kabuli</i>    | Ca_Kabuli_Chr05              | 27786025                       | (T/C)       |
| 8238        | CakSNP8238     | <i>Kabuli</i>    | Ca_Kabuli_Chr05              | 27838003                       | (T/C)       |
| 8239        | CakSNP8239     | <i>Kabuli</i>    | Ca_Kabuli_Chr05              | 27850760                       | (T/C)       |
| 8240        | CakSNP8240     | <i>Kabuli</i>    | Ca_Kabuli_Chr05              | 27850735                       | (C/A)       |
| 8241        | CakSNP8241     | <i>Kabuli</i>    | Ca_Kabuli_Chr05              | 27853444                       | (C/T)       |
| 8242        | CakSNP8242     | <i>Kabuli</i>    | Ca_Kabuli_Chr05              | 27872968                       | (C/T)       |
| 8243        | CakSNP8243     | <i>Kabuli</i>    | Ca_Kabuli_Chr05              | 27873001                       | (T/C)       |
| 8244        | CakSNP8244     | <i>Kabuli</i>    | Ca_Kabuli_Chr05              | 27874414                       | (C/A)       |
| 8245        | CakSNP8245     | <i>Kabuli</i>    | Ca_Kabuli_Chr05              | 27936521                       | (A/G)       |

| <b>S.N.</b> | <b>SNP IDs</b> | <b>Cultivars</b> | <b>Chromosomes/scaffolds</b> | <b>Physical positions (bp)</b> | <b>SNPs</b> |
|-------------|----------------|------------------|------------------------------|--------------------------------|-------------|
| 8246        | CakSNP8246     | <i>Kabuli</i>    | Ca_Kabuli_Chr05              | 27936524                       | (C/T)       |
| 8247        | CakSNP8247     | <i>Kabuli</i>    | Ca_Kabuli_Chr05              | 27939162                       | (G/A)       |
| 8248        | CakSNP8248     | <i>Kabuli</i>    | Ca_Kabuli_Chr05              | 27939135                       | (G/C)       |
| 8249        | CakSNP8249     | <i>Kabuli</i>    | Ca_Kabuli_Chr05              | 27939134                       | (A/T)       |
| 8250        | CakSNP8250     | <i>Kabuli</i>    | Ca_Kabuli_Chr05              | 27939128                       | (A/G)       |
| 8251        | CakSNP8251     | <i>Kabuli</i>    | Ca_Kabuli_Chr05              | 27974691                       | (G/T)       |
| 8252        | CakSNP8252     | <i>Kabuli</i>    | Ca_Kabuli_Chr05              | 28016628                       | (C/T)       |
| 8253        | CakSNP8253     | <i>Kabuli</i>    | Ca_Kabuli_Chr05              | 28016669                       | (A/G)       |
| 8254        | CakSNP8254     | <i>Kabuli</i>    | Ca_Kabuli_Chr05              | 28071467                       | (A/G)       |
| 8255        | CakSNP8255     | <i>Kabuli</i>    | Ca_Kabuli_Chr05              | 28116818                       | (A/G)       |
| 8256        | CakSNP8256     | <i>Kabuli</i>    | Ca_Kabuli_Chr05              | 28116988                       | (A/T)       |
| 8257        | CakSNP8257     | <i>Kabuli</i>    | Ca_Kabuli_Chr05              | 28117011                       | (C/T)       |
| 8258        | CakSNP8258     | <i>Kabuli</i>    | Ca_Kabuli_Chr05              | 28164985                       | (G/C)       |
| 8259        | CakSNP8259     | <i>Kabuli</i>    | Ca_Kabuli_Chr05              | 28168910                       | (A/G)       |
| 8260        | CakSNP8260     | <i>Kabuli</i>    | Ca_Kabuli_Chr05              | 28169475                       | (T/C)       |
| 8261        | CakSNP8261     | <i>Kabuli</i>    | Ca_Kabuli_Chr05              | 28175039                       | (A/G)       |
| 8262        | CakSNP8262     | <i>Kabuli</i>    | Ca_Kabuli_Chr05              | 28266046                       | (T/G)       |
| 8263        | CakSNP8263     | <i>Kabuli</i>    | Ca_Kabuli_Chr05              | 28271638                       | (G/C)       |
| 8264        | CakSNP8264     | <i>Kabuli</i>    | Ca_Kabuli_Chr05              | 28271732                       | (C/T)       |
| 8265        | CakSNP8265     | <i>Kabuli</i>    | Ca_Kabuli_Chr05              | 28271733                       | (G/A)       |
| 8266        | CakSNP8266     | <i>Kabuli</i>    | Ca_Kabuli_Chr05              | 28271742                       | (G/A)       |
| 8267        | CakSNP8267     | <i>Kabuli</i>    | Ca_Kabuli_Chr05              | 28271767                       | (G/C)       |
| 8268        | CakSNP8268     | <i>Kabuli</i>    | Ca_Kabuli_Chr05              | 28284640                       | (T/C)       |
| 8269        | CakSNP8269     | <i>Kabuli</i>    | Ca_Kabuli_Chr05              | 28327832                       | (T/G)       |
| 8270        | CakSNP8270     | <i>Kabuli</i>    | Ca_Kabuli_Chr05              | 28327883                       | (G/A)       |
| 8271        | CakSNP8271     | <i>Kabuli</i>    | Ca_Kabuli_Chr05              | 28327870                       | (T/C)       |
| 8272        | CakSNP8272     | <i>Kabuli</i>    | Ca_Kabuli_Chr05              | 28327868                       | (G/A)       |
| 8273        | CakSNP8273     | <i>Kabuli</i>    | Ca_Kabuli_Chr05              | 28327856                       | (T/C)       |
| 8274        | CakSNP8274     | <i>Kabuli</i>    | Ca_Kabuli_Chr05              | 28335455                       | (A/C)       |
| 8275        | CakSNP8275     | <i>Kabuli</i>    | Ca_Kabuli_Chr05              | 28346497                       | (C/T)       |
| 8276        | CakSNP8276     | <i>Kabuli</i>    | Ca_Kabuli_Chr05              | 28360495                       | (C/T)       |
| 8277        | CakSNP8277     | <i>Kabuli</i>    | Ca_Kabuli_Chr05              | 28360492                       | (C/T)       |
| 8278        | CakSNP8278     | <i>Kabuli</i>    | Ca_Kabuli_Chr05              | 28360585                       | (A/G)       |
| 8279        | CakSNP8279     | <i>Kabuli</i>    | Ca_Kabuli_Chr05              | 28383374                       | (G/T)       |
| 8280        | CakSNP8280     | <i>Kabuli</i>    | Ca_Kabuli_Chr05              | 28491113                       | (G/A)       |
| 8281        | CakSNP8281     | <i>Kabuli</i>    | Ca_Kabuli_Chr05              | 28491131                       | (G/A)       |
| 8282        | CakSNP8282     | <i>Kabuli</i>    | Ca_Kabuli_Chr05              | 28509048                       | (G/A)       |
| 8283        | CakSNP8283     | <i>Kabuli</i>    | Ca_Kabuli_Chr05              | 28509066                       | (G/A)       |

| <b>S.N.</b> | <b>SNP IDs</b> | <b>Cultivars</b> | <b>Chromosomes/scaffolds</b> | <b>Physical positions (bp)</b> | <b>SNPs</b> |
|-------------|----------------|------------------|------------------------------|--------------------------------|-------------|
| 8284        | CakSNP8284     | <i>Kabuli</i>    | Ca_Kabuli_Chr05              | 28562734                       | (G/A)       |
| 8285        | CakSNP8285     | <i>Kabuli</i>    | Ca_Kabuli_Chr05              | 28581814                       | (A/G)       |
| 8286        | CakSNP8286     | <i>Kabuli</i>    | Ca_Kabuli_Chr05              | 28581815                       | (C/G)       |
| 8287        | CakSNP8287     | <i>Kabuli</i>    | Ca_Kabuli_Chr05              | 28581827                       | (T/C)       |
| 8288        | CakSNP8288     | <i>Kabuli</i>    | Ca_Kabuli_Chr05              | 28581866                       | (T/C)       |
| 8289        | CakSNP8289     | <i>Kabuli</i>    | Ca_Kabuli_Chr05              | 28581926                       | (C/A)       |
| 8290        | CakSNP8290     | <i>Kabuli</i>    | Ca_Kabuli_Chr05              | 28582525                       | (C/T)       |
| 8291        | CakSNP8291     | <i>Kabuli</i>    | Ca_Kabuli_Chr05              | 28582806                       | (T/C)       |
| 8292        | CakSNP8292     | <i>Kabuli</i>    | Ca_Kabuli_Chr05              | 28582763                       | (A/G)       |
| 8293        | CakSNP8293     | <i>Kabuli</i>    | Ca_Kabuli_Chr05              | 28583402                       | (G/A)       |
| 8294        | CakSNP8294     | <i>Kabuli</i>    | Ca_Kabuli_Chr05              | 28583375                       | (C/G)       |
| 8295        | CakSNP8295     | <i>Kabuli</i>    | Ca_Kabuli_Chr05              | 28682973                       | (A/C)       |
| 8296        | CakSNP8296     | <i>Kabuli</i>    | Ca_Kabuli_Chr05              | 28682995                       | (G/A)       |
| 8297        | CakSNP8297     | <i>Kabuli</i>    | Ca_Kabuli_Chr05              | 28683084                       | (A/C)       |
| 8298        | CakSNP8298     | <i>Kabuli</i>    | Ca_Kabuli_Chr05              | 28683070                       | (T/A)       |
| 8299        | CakSNP8299     | <i>Kabuli</i>    | Ca_Kabuli_Chr05              | 28683069                       | (A/T)       |
| 8300        | CakSNP8300     | <i>Kabuli</i>    | Ca_Kabuli_Chr05              | 28714658                       | (C/T)       |
| 8301        | CakSNP8301     | <i>Kabuli</i>    | Ca_Kabuli_Chr05              | 28717362                       | (C/T)       |
| 8302        | CakSNP8302     | <i>Kabuli</i>    | Ca_Kabuli_Chr05              | 28717384                       | (C/T)       |
| 8303        | CakSNP8303     | <i>Kabuli</i>    | Ca_Kabuli_Chr05              | 28721236                       | (C/T)       |
| 8304        | CakSNP8304     | <i>Kabuli</i>    | Ca_Kabuli_Chr05              | 28721237                       | (A/G)       |
| 8305        | CakSNP8305     | <i>Kabuli</i>    | Ca_Kabuli_Chr05              | 28721386                       | (T/C)       |
| 8306        | CakSNP8306     | <i>Kabuli</i>    | Ca_Kabuli_Chr05              | 28721383                       | (A/C)       |
| 8307        | CakSNP8307     | <i>Kabuli</i>    | Ca_Kabuli_Chr05              | 28746139                       | (A/G)       |
| 8308        | CakSNP8308     | <i>Kabuli</i>    | Ca_Kabuli_Chr05              | 28757467                       | (A/T)       |
| 8309        | CakSNP8309     | <i>Kabuli</i>    | Ca_Kabuli_Chr05              | 28757474                       | (T/C)       |
| 8310        | CakSNP8310     | <i>Kabuli</i>    | Ca_Kabuli_Chr05              | 28757479                       | (T/C)       |
| 8311        | CakSNP8311     | <i>Kabuli</i>    | Ca_Kabuli_Chr05              | 28757485                       | (A/C)       |
| 8312        | CakSNP8312     | <i>Kabuli</i>    | Ca_Kabuli_Chr05              | 28757507                       | (A/T)       |
| 8313        | CakSNP8313     | <i>Kabuli</i>    | Ca_Kabuli_Chr05              | 28758723                       | (A/G)       |
| 8314        | CakSNP8314     | <i>Kabuli</i>    | Ca_Kabuli_Chr05              | 28817832                       | (A/G)       |
| 8315        | CakSNP8315     | <i>Kabuli</i>    | Ca_Kabuli_Chr05              | 28827467                       | (A/G)       |
| 8316        | CakSNP8316     | <i>Kabuli</i>    | Ca_Kabuli_Chr05              | 28843854                       | (G/A)       |
| 8317        | CakSNP8317     | <i>Kabuli</i>    | Ca_Kabuli_Chr05              | 28843801                       | (A/G)       |
| 8318        | CakSNP8318     | <i>Kabuli</i>    | Ca_Kabuli_Chr05              | 28843795                       | (A/T)       |
| 8319        | CakSNP8319     | <i>Kabuli</i>    | Ca_Kabuli_Chr05              | 28843782                       | (C/G)       |
| 8320        | CakSNP8320     | <i>Kabuli</i>    | Ca_Kabuli_Chr05              | 28843775                       | (C/T)       |
| 8321        | CakSNP8321     | <i>Kabuli</i>    | Ca_Kabuli_Chr05              | 28854486                       | (C/T)       |

| <b>S.N.</b> | <b>SNP IDs</b> | <b>Cultivars</b> | <b>Chromosomes/scaffolds</b> | <b>Physical positions (bp)</b> | <b>SNPs</b> |
|-------------|----------------|------------------|------------------------------|--------------------------------|-------------|
| 8322        | CakSNP8322     | <i>Kabuli</i>    | Ca_Kabuli_Chr05              | 28905203                       | (A/C)       |
| 8323        | CakSNP8323     | <i>Kabuli</i>    | Ca_Kabuli_Chr05              | 29007895                       | (T/C)       |
| 8324        | CakSNP8324     | <i>Kabuli</i>    | Ca_Kabuli_Chr05              | 29007886                       | (C/A)       |
| 8325        | CakSNP8325     | <i>Kabuli</i>    | Ca_Kabuli_Chr05              | 29007884                       | (A/C)       |
| 8326        | CakSNP8326     | <i>Kabuli</i>    | Ca_Kabuli_Chr05              | 29007882                       | (A/C)       |
| 8327        | CakSNP8327     | <i>Kabuli</i>    | Ca_Kabuli_Chr05              | 29007879                       | (T/C)       |
| 8328        | CakSNP8328     | <i>Kabuli</i>    | Ca_Kabuli_Chr05              | 29007847                       | (A/C)       |
| 8329        | CakSNP8329     | <i>Kabuli</i>    | Ca_Kabuli_Chr05              | 29007844                       | (T/C)       |
| 8330        | CakSNP8330     | <i>Kabuli</i>    | Ca_Kabuli_Chr05              | 29061056                       | (T/A)       |
| 8331        | CakSNP8331     | <i>Kabuli</i>    | Ca_Kabuli_Chr05              | 29061025                       | (A/C)       |
| 8332        | CakSNP8332     | <i>Kabuli</i>    | Ca_Kabuli_Chr05              | 29060992                       | (C/T)       |
| 8333        | CakSNP8333     | <i>Kabuli</i>    | Ca_Kabuli_Chr05              | 29062696                       | (G/A)       |
| 8334        | CakSNP8334     | <i>Kabuli</i>    | Ca_Kabuli_Chr05              | 29062738                       | (A/G)       |
| 8335        | CakSNP8335     | <i>Kabuli</i>    | Ca_Kabuli_Chr05              | 29079931                       | (G/A)       |
| 8336        | CakSNP8336     | <i>Kabuli</i>    | Ca_Kabuli_Chr05              | 29079962                       | (A/G)       |
| 8337        | CakSNP8337     | <i>Kabuli</i>    | Ca_Kabuli_Chr05              | 29080066                       | (G/C)       |
| 8338        | CakSNP8338     | <i>Kabuli</i>    | Ca_Kabuli_Chr05              | 29080060                       | (C/T)       |
| 8339        | CakSNP8339     | <i>Kabuli</i>    | Ca_Kabuli_Chr05              | 29111292                       | (T/G)       |
| 8340        | CakSNP8340     | <i>Kabuli</i>    | Ca_Kabuli_Chr05              | 29111293                       | (T/C)       |
| 8341        | CakSNP8341     | <i>Kabuli</i>    | Ca_Kabuli_Chr05              | 29186179                       | (T/G)       |
| 8342        | CakSNP8342     | <i>Kabuli</i>    | Ca_Kabuli_Chr05              | 29220980                       | (T/A)       |
| 8343        | CakSNP8343     | <i>Kabuli</i>    | Ca_Kabuli_Chr05              | 29221003                       | (T/C)       |
| 8344        | CakSNP8344     | <i>Kabuli</i>    | Ca_Kabuli_Chr05              | 29221919                       | (T/A)       |
| 8345        | CakSNP8345     | <i>Kabuli</i>    | Ca_Kabuli_Chr05              | 29272117                       | (C/G)       |
| 8346        | CakSNP8346     | <i>Kabuli</i>    | Ca_Kabuli_Chr05              | 29272125                       | (C/T)       |
| 8347        | CakSNP8347     | <i>Kabuli</i>    | Ca_Kabuli_Chr05              | 29354269                       | (A/T)       |
| 8348        | CakSNP8348     | <i>Kabuli</i>    | Ca_Kabuli_Chr05              | 29422029                       | (T/A)       |
| 8349        | CakSNP8349     | <i>Kabuli</i>    | Ca_Kabuli_Chr05              | 29422066                       | (A/T)       |
| 8350        | CakSNP8350     | <i>Kabuli</i>    | Ca_Kabuli_Chr05              | 29422091                       | (C/T)       |
| 8351        | CakSNP8351     | <i>Kabuli</i>    | Ca_Kabuli_Chr05              | 29437139                       | (C/T)       |
| 8352        | CakSNP8352     | <i>Kabuli</i>    | Ca_Kabuli_Chr05              | 29437146                       | (C/A)       |
| 8353        | CakSNP8353     | <i>Kabuli</i>    | Ca_Kabuli_Chr05              | 29437159                       | (C/T)       |
| 8354        | CakSNP8354     | <i>Kabuli</i>    | Ca_Kabuli_Chr05              | 29437162                       | (A/C)       |
| 8355        | CakSNP8355     | <i>Kabuli</i>    | Ca_Kabuli_Chr05              | 29437171                       | (A/T)       |
| 8356        | CakSNP8356     | <i>Kabuli</i>    | Ca_Kabuli_Chr05              | 29437181                       | (A/C)       |
| 8357        | CakSNP8357     | <i>Kabuli</i>    | Ca_Kabuli_Chr05              | 29437189                       | (C/T)       |
| 8358        | CakSNP8358     | <i>Kabuli</i>    | Ca_Kabuli_Chr05              | 29437193                       | (A/C)       |
| 8359        | CakSNP8359     | <i>Kabuli</i>    | Ca_Kabuli_Chr05              | 29437182                       | (C/A)       |

| <b>S.N.</b> | <b>SNP IDs</b> | <b>Cultivars</b> | <b>Chromosomes/scaffolds</b> | <b>Physical positions (bp)</b> | <b>SNPs</b> |
|-------------|----------------|------------------|------------------------------|--------------------------------|-------------|
| 8360        | CakSNP8360     | <i>Kabuli</i>    | Ca_Kabuli_Chr05              | 29528859                       | (A/T)       |
| 8361        | CakSNP8361     | <i>Kabuli</i>    | Ca_Kabuli_Chr05              | 29528890                       | (T/A)       |
| 8362        | CakSNP8362     | <i>Kabuli</i>    | Ca_Kabuli_Chr05              | 29528904                       | (T/G)       |
| 8363        | CakSNP8363     | <i>Kabuli</i>    | Ca_Kabuli_Chr05              | 29530996                       | (G/A)       |
| 8364        | CakSNP8364     | <i>Kabuli</i>    | Ca_Kabuli_Chr05              | 29531122                       | (A/T)       |
| 8365        | CakSNP8365     | <i>Kabuli</i>    | Ca_Kabuli_Chr05              | 29531113                       | (G/A)       |
| 8366        | CakSNP8366     | <i>Kabuli</i>    | Ca_Kabuli_Chr05              | 29531218                       | (A/T)       |
| 8367        | CakSNP8367     | <i>Kabuli</i>    | Ca_Kabuli_Chr05              | 29531416                       | (A/G)       |
| 8368        | CakSNP8368     | <i>Kabuli</i>    | Ca_Kabuli_Chr05              | 29567676                       | (T/C)       |
| 8369        | CakSNP8369     | <i>Kabuli</i>    | Ca_Kabuli_Chr05              | 29567820                       | (T/C)       |
| 8370        | CakSNP8370     | <i>Kabuli</i>    | Ca_Kabuli_Chr05              | 29576690                       | (A/T)       |
| 8371        | CakSNP8371     | <i>Kabuli</i>    | Ca_Kabuli_Chr05              | 29576689                       | (G/A)       |
| 8372        | CakSNP8372     | <i>Kabuli</i>    | Ca_Kabuli_Chr05              | 29576716                       | (A/C)       |
| 8373        | CakSNP8373     | <i>Kabuli</i>    | Ca_Kabuli_Chr05              | 29608657                       | (T/C)       |
| 8374        | CakSNP8374     | <i>Kabuli</i>    | Ca_Kabuli_Chr05              | 29641659                       | (T/C)       |
| 8375        | CakSNP8375     | <i>Kabuli</i>    | Ca_Kabuli_Chr05              | 29658258                       | (G/C)       |
| 8376        | CakSNP8376     | <i>Kabuli</i>    | Ca_Kabuli_Chr05              | 29658280                       | (A/C)       |
| 8377        | CakSNP8377     | <i>Kabuli</i>    | Ca_Kabuli_Chr05              | 29667787                       | (C/G)       |
| 8378        | CakSNP8378     | <i>Kabuli</i>    | Ca_Kabuli_Chr05              | 29667783                       | (C/T)       |
| 8379        | CakSNP8379     | <i>Kabuli</i>    | Ca_Kabuli_Chr05              | 29667774                       | (G/C)       |
| 8380        | CakSNP8380     | <i>Kabuli</i>    | Ca_Kabuli_Chr05              | 29809862                       | (A/C)       |
| 8381        | CakSNP8381     | <i>Kabuli</i>    | Ca_Kabuli_Chr05              | 29816799                       | (T/C)       |
| 8382        | CakSNP8382     | <i>Kabuli</i>    | Ca_Kabuli_Chr05              | 29816800                       | (T/A)       |
| 8383        | CakSNP8383     | <i>Kabuli</i>    | Ca_Kabuli_Chr05              | 29824218                       | (T/G)       |
| 8384        | CakSNP8384     | <i>Kabuli</i>    | Ca_Kabuli_Chr05              | 29852130                       | (T/C)       |
| 8385        | CakSNP8385     | <i>Kabuli</i>    | Ca_Kabuli_Chr05              | 29852105                       | (T/G)       |
| 8386        | CakSNP8386     | <i>Kabuli</i>    | Ca_Kabuli_Chr05              | 29886086                       | (T/A)       |
| 8387        | CakSNP8387     | <i>Kabuli</i>    | Ca_Kabuli_Chr05              | 29981826                       | (A/G)       |
| 8388        | CakSNP8388     | <i>Kabuli</i>    | Ca_Kabuli_Chr05              | 29999414                       | (C/T)       |
| 8389        | CakSNP8389     | <i>Kabuli</i>    | Ca_Kabuli_Chr05              | 29999427                       | (G/A)       |
| 8390        | CakSNP8390     | <i>Kabuli</i>    | Ca_Kabuli_Chr05              | 29999433                       | (C/A)       |
| 8391        | CakSNP8391     | <i>Kabuli</i>    | Ca_Kabuli_Chr05              | 29999465                       | (T/G)       |
| 8392        | CakSNP8392     | <i>Kabuli</i>    | Ca_Kabuli_Chr05              | 29999476                       | (G/A)       |
| 8393        | CakSNP8393     | <i>Kabuli</i>    | Ca_Kabuli_Chr05              | 29999523                       | (A/T)       |
| 8394        | CakSNP8394     | <i>Kabuli</i>    | Ca_Kabuli_Chr05              | 30035763                       | (A/T)       |
| 8395        | CakSNP8395     | <i>Kabuli</i>    | Ca_Kabuli_Chr05              | 30049265                       | (G/A)       |
| 8396        | CakSNP8396     | <i>Kabuli</i>    | Ca_Kabuli_Chr05              | 30053540                       | (C/G)       |
| 8397        | CakSNP8397     | <i>Kabuli</i>    | Ca_Kabuli_Chr05              | 30060160                       | (C/T)       |

| <b>S.N.</b> | <b>SNP IDs</b> | <b>Cultivars</b> | <b>Chromosomes/scaffolds</b> | <b>Physical positions (bp)</b> | <b>SNPs</b> |
|-------------|----------------|------------------|------------------------------|--------------------------------|-------------|
| 8398        | CakSNP8398     | <i>Kabuli</i>    | Ca_Kabuli_Chr05              | 30086073                       | (A/G)       |
| 8399        | CakSNP8399     | <i>Kabuli</i>    | Ca_Kabuli_Chr05              | 30086232                       | (A/C)       |
| 8400        | CakSNP8400     | <i>Kabuli</i>    | Ca_Kabuli_Chr05              | 30090906                       | (A/G)       |
| 8401        | CakSNP8401     | <i>Kabuli</i>    | Ca_Kabuli_Chr05              | 30091063                       | (G/A)       |
| 8402        | CakSNP8402     | <i>Kabuli</i>    | Ca_Kabuli_Chr05              | 30116978                       | (C/T)       |
| 8403        | CakSNP8403     | <i>Kabuli</i>    | Ca_Kabuli_Chr05              | 30116992                       | (T/G)       |
| 8404        | CakSNP8404     | <i>Kabuli</i>    | Ca_Kabuli_Chr05              | 30159226                       | (C/T)       |
| 8405        | CakSNP8405     | <i>Kabuli</i>    | Ca_Kabuli_Chr05              | 30159173                       | (G/A)       |
| 8406        | CakSNP8406     | <i>Kabuli</i>    | Ca_Kabuli_Chr05              | 30159161                       | (G/A)       |
| 8407        | CakSNP8407     | <i>Kabuli</i>    | Ca_Kabuli_Chr05              | 30191389                       | (A/C)       |
| 8408        | CakSNP8408     | <i>Kabuli</i>    | Ca_Kabuli_Chr05              | 30248447                       | (C/A)       |
| 8409        | CakSNP8409     | <i>Kabuli</i>    | Ca_Kabuli_Chr05              | 30258178                       | (T/G)       |
| 8410        | CakSNP8410     | <i>Kabuli</i>    | Ca_Kabuli_Chr05              | 30287853                       | (C/T)       |
| 8411        | CakSNP8411     | <i>Kabuli</i>    | Ca_Kabuli_Chr05              | 30304076                       | (A/T)       |
| 8412        | CakSNP8412     | <i>Kabuli</i>    | Ca_Kabuli_Chr05              | 30319316                       | (A/G)       |
| 8413        | CakSNP8413     | <i>Kabuli</i>    | Ca_Kabuli_Chr05              | 30359047                       | (T/C)       |
| 8414        | CakSNP8414     | <i>Kabuli</i>    | Ca_Kabuli_Chr05              | 30359022                       | (G/A)       |
| 8415        | CakSNP8415     | <i>Kabuli</i>    | Ca_Kabuli_Chr05              | 30360185                       | (T/C)       |
| 8416        | CakSNP8416     | <i>Kabuli</i>    | Ca_Kabuli_Chr05              | 30360348                       | (T/C)       |
| 8417        | CakSNP8417     | <i>Kabuli</i>    | Ca_Kabuli_Chr05              | 30367349                       | (G/T)       |
| 8418        | CakSNP8418     | <i>Kabuli</i>    | Ca_Kabuli_Chr05              | 30373542                       | (A/G)       |
| 8419        | CakSNP8419     | <i>Kabuli</i>    | Ca_Kabuli_Chr05              | 30373783                       | (T/A)       |
| 8420        | CakSNP8420     | <i>Kabuli</i>    | Ca_Kabuli_Chr05              | 30376661                       | (C/G)       |
| 8421        | CakSNP8421     | <i>Kabuli</i>    | Ca_Kabuli_Chr05              | 30376722                       | (T/C)       |
| 8422        | CakSNP8422     | <i>Kabuli</i>    | Ca_Kabuli_Chr05              | 30376723                       | (T/C)       |
| 8423        | CakSNP8423     | <i>Kabuli</i>    | Ca_Kabuli_Chr05              | 30378114                       | (A/G)       |
| 8424        | CakSNP8424     | <i>Kabuli</i>    | Ca_Kabuli_Chr05              | 30378184                       | (A/G)       |
| 8425        | CakSNP8425     | <i>Kabuli</i>    | Ca_Kabuli_Chr05              | 30407725                       | (C/G)       |
| 8426        | CakSNP8426     | <i>Kabuli</i>    | Ca_Kabuli_Chr05              | 30408006                       | (C/T)       |
| 8427        | CakSNP8427     | <i>Kabuli</i>    | Ca_Kabuli_Chr05              | 30438913                       | (G/A)       |
| 8428        | CakSNP8428     | <i>Kabuli</i>    | Ca_Kabuli_Chr05              | 30443858                       | (A/T)       |
| 8429        | CakSNP8429     | <i>Kabuli</i>    | Ca_Kabuli_Chr05              | 30562430                       | (C/G)       |
| 8430        | CakSNP8430     | <i>Kabuli</i>    | Ca_Kabuli_Chr05              | 30562524                       | (G/T)       |
| 8431        | CakSNP8431     | <i>Kabuli</i>    | Ca_Kabuli_Chr05              | 30601932                       | (T/C)       |
| 8432        | CakSNP8432     | <i>Kabuli</i>    | Ca_Kabuli_Chr05              | 30601926                       | (T/C)       |
| 8433        | CakSNP8433     | <i>Kabuli</i>    | Ca_Kabuli_Chr05              | 30601920                       | (T/C)       |
| 8434        | CakSNP8434     | <i>Kabuli</i>    | Ca_Kabuli_Chr05              | 30627937                       | (G/T)       |
| 8435        | CakSNP8435     | <i>Kabuli</i>    | Ca_Kabuli_Chr05              | 30632697                       | (A/G)       |



| <b>S.N.</b> | <b>SNP IDs</b> | <b>Cultivars</b> | <b>Chromosomes/scaffolds</b> | <b>Physical positions (bp)</b> | <b>SNPs</b> |
|-------------|----------------|------------------|------------------------------|--------------------------------|-------------|
| 8436        | CakSNP8436     | <i>Kabuli</i>    | Ca_Kabuli_Chr05              | 30655941                       | (T/C)       |
| 8437        | CakSNP8437     | <i>Kabuli</i>    | Ca_Kabuli_Chr05              | 30656058                       | (A/T)       |
| 8438        | CakSNP8438     | <i>Kabuli</i>    | Ca_Kabuli_Chr05              | 30690891                       | (T/G)       |
| 8439        | CakSNP8439     | <i>Kabuli</i>    | Ca_Kabuli_Chr05              | 30690852                       | (G/A)       |
| 8440        | CakSNP8440     | <i>Kabuli</i>    | Ca_Kabuli_Chr05              | 30690885                       | (A/G)       |
| 8441        | CakSNP8441     | <i>Kabuli</i>    | Ca_Kabuli_Chr05              | 30691510                       | (A/G)       |
| 8442        | CakSNP8442     | <i>Kabuli</i>    | Ca_Kabuli_Chr05              | 30691515                       | (G/A)       |
| 8443        | CakSNP8443     | <i>Kabuli</i>    | Ca_Kabuli_Chr05              | 30691543                       | (A/G)       |
| 8444        | CakSNP8444     | <i>Kabuli</i>    | Ca_Kabuli_Chr05              | 30697511                       | (G/A)       |
| 8445        | CakSNP8445     | <i>Kabuli</i>    | Ca_Kabuli_Chr05              | 30745571                       | (G/T)       |
| 8446        | CakSNP8446     | <i>Kabuli</i>    | Ca_Kabuli_Chr05              | 30749553                       | (A/T)       |
| 8447        | CakSNP8447     | <i>Kabuli</i>    | Ca_Kabuli_Chr05              | 30749696                       | (A/T)       |
| 8448        | CakSNP8448     | <i>Kabuli</i>    | Ca_Kabuli_Chr05              | 30755644                       | (A/G)       |
| 8449        | CakSNP8449     | <i>Kabuli</i>    | Ca_Kabuli_Chr05              | 30755584                       | (G/A)       |
| 8450        | CakSNP8450     | <i>Kabuli</i>    | Ca_Kabuli_Chr05              | 30811250                       | (A/T)       |
| 8451        | CakSNP8451     | <i>Kabuli</i>    | Ca_Kabuli_Chr05              | 30864010                       | (T/C)       |
| 8452        | CakSNP8452     | <i>Kabuli</i>    | Ca_Kabuli_Chr05              | 30868770                       | (G/C)       |
| 8453        | CakSNP8453     | <i>Kabuli</i>    | Ca_Kabuli_Chr05              | 30868695                       | (G/C)       |
| 8454        | CakSNP8454     | <i>Kabuli</i>    | Ca_Kabuli_Chr05              | 30878047                       | (C/T)       |
| 8455        | CakSNP8455     | <i>Kabuli</i>    | Ca_Kabuli_Chr05              | 30878092                       | (G/T)       |
| 8456        | CakSNP8456     | <i>Kabuli</i>    | Ca_Kabuli_Chr05              | 30878100                       | (T/A)       |
| 8457        | CakSNP8457     | <i>Kabuli</i>    | Ca_Kabuli_Chr05              | 30890480                       | (G/C)       |
| 8458        | CakSNP8458     | <i>Kabuli</i>    | Ca_Kabuli_Chr05              | 30962640                       | (A/T)       |
| 8459        | CakSNP8459     | <i>Kabuli</i>    | Ca_Kabuli_Chr05              | 30962641                       | (C/A)       |
| 8460        | CakSNP8460     | <i>Kabuli</i>    | Ca_Kabuli_Chr05              | 30962650                       | (G/A)       |
| 8461        | CakSNP8461     | <i>Kabuli</i>    | Ca_Kabuli_Chr05              | 30964628                       | (A/G)       |
| 8462        | CakSNP8462     | <i>Kabuli</i>    | Ca_Kabuli_Chr05              | 31024408                       | (T/C)       |
| 8463        | CakSNP8463     | <i>Kabuli</i>    | Ca_Kabuli_Chr05              | 31025764                       | (G/T)       |
| 8464        | CakSNP8464     | <i>Kabuli</i>    | Ca_Kabuli_Chr05              | 31034500                       | (T/C)       |
| 8465        | CakSNP8465     | <i>Kabuli</i>    | Ca_Kabuli_Chr05              | 31034898                       | (A/G)       |
| 8466        | CakSNP8466     | <i>Kabuli</i>    | Ca_Kabuli_Chr05              | 31064173                       | (C/G)       |
| 8467        | CakSNP8467     | <i>Kabuli</i>    | Ca_Kabuli_Chr05              | 31072213                       | (T/C)       |
| 8468        | CakSNP8468     | <i>Kabuli</i>    | Ca_Kabuli_Chr05              | 31072276                       | (G/A)       |
| 8469        | CakSNP8469     | <i>Kabuli</i>    | Ca_Kabuli_Chr05              | 31084839                       | (A/C)       |
| 8470        | CakSNP8470     | <i>Kabuli</i>    | Ca_Kabuli_Chr05              | 31088698                       | (T/G)       |
| 8471        | CakSNP8471     | <i>Kabuli</i>    | Ca_Kabuli_Chr05              | 31126125                       | (C/T)       |
| 8472        | CakSNP8472     | <i>Kabuli</i>    | Ca_Kabuli_Chr05              | 31131830                       | (T/C)       |
| 8473        | CakSNP8473     | <i>Kabuli</i>    | Ca_Kabuli_Chr05              | 31132568                       | (A/T)       |

| <b>S.N.</b> | <b>SNP IDs</b> | <b>Cultivars</b> | <b>Chromosomes/scaffolds</b> | <b>Physical positions (bp)</b> | <b>SNPs</b> |
|-------------|----------------|------------------|------------------------------|--------------------------------|-------------|
| 8474        | CakSNP8474     | <i>Kabuli</i>    | Ca_Kabuli_Chr05              | 31138650                       | (G/A)       |
| 8475        | CakSNP8475     | <i>Kabuli</i>    | Ca_Kabuli_Chr05              | 31140531                       | (T/C)       |
| 8476        | CakSNP8476     | <i>Kabuli</i>    | Ca_Kabuli_Chr05              | 31162533                       | (G/A)       |
| 8477        | CakSNP8477     | <i>Kabuli</i>    | Ca_Kabuli_Chr05              | 31164387                       | (G/C)       |
| 8478        | CakSNP8478     | <i>Kabuli</i>    | Ca_Kabuli_Chr05              | 31164539                       | (T/C)       |
| 8479        | CakSNP8479     | <i>Kabuli</i>    | Ca_Kabuli_Chr05              | 31165048                       | (T/C)       |
| 8480        | CakSNP8480     | <i>Kabuli</i>    | Ca_Kabuli_Chr05              | 31165039                       | (T/C)       |
| 8481        | CakSNP8481     | <i>Kabuli</i>    | Ca_Kabuli_Chr05              | 31165035                       | (T/C)       |
| 8482        | CakSNP8482     | <i>Kabuli</i>    | Ca_Kabuli_Chr05              | 31165002                       | (A/C)       |
| 8483        | CakSNP8483     | <i>Kabuli</i>    | Ca_Kabuli_Chr05              | 31171555                       | (G/A)       |
| 8484        | CakSNP8484     | <i>Kabuli</i>    | Ca_Kabuli_Chr05              | 31176722                       | (T/G)       |
| 8485        | CakSNP8485     | <i>Kabuli</i>    | Ca_Kabuli_Chr05              | 31176810                       | (C/T)       |
| 8486        | CakSNP8486     | <i>Kabuli</i>    | Ca_Kabuli_Chr05              | 31176844                       | (G/A)       |
| 8487        | CakSNP8487     | <i>Kabuli</i>    | Ca_Kabuli_Chr05              | 31192415                       | (C/T)       |
| 8488        | CakSNP8488     | <i>Kabuli</i>    | Ca_Kabuli_Chr05              | 31192413                       | (G/A)       |
| 8489        | CakSNP8489     | <i>Kabuli</i>    | Ca_Kabuli_Chr05              | 31194845                       | (G/T)       |
| 8490        | CakSNP8490     | <i>Kabuli</i>    | Ca_Kabuli_Chr05              | 31194974                       | (T/C)       |
| 8491        | CakSNP8491     | <i>Kabuli</i>    | Ca_Kabuli_Chr05              | 31194988                       | (G/T)       |
| 8492        | CakSNP8492     | <i>Kabuli</i>    | Ca_Kabuli_Chr05              | 31194989                       | (A/C)       |
| 8493        | CakSNP8493     | <i>Kabuli</i>    | Ca_Kabuli_Chr05              | 31215109                       | (C/T)       |
| 8494        | CakSNP8494     | <i>Kabuli</i>    | Ca_Kabuli_Chr05              | 31310698                       | (C/T)       |
| 8495        | CakSNP8495     | <i>Kabuli</i>    | Ca_Kabuli_Chr05              | 31310702                       | (C/G)       |
| 8496        | CakSNP8496     | <i>Kabuli</i>    | Ca_Kabuli_Chr05              | 31310703                       | (A/G)       |
| 8497        | CakSNP8497     | <i>Kabuli</i>    | Ca_Kabuli_Chr05              | 31310741                       | (A/G)       |
| 8498        | CakSNP8498     | <i>Kabuli</i>    | Ca_Kabuli_Chr05              | 31314012                       | (A/C)       |
| 8499        | CakSNP8499     | <i>Kabuli</i>    | Ca_Kabuli_Chr05              | 31314056                       | (A/C)       |
| 8500        | CakSNP8500     | <i>Kabuli</i>    | Ca_Kabuli_Chr05              | 31344725                       | (G/A)       |
| 8501        | CakSNP8501     | <i>Kabuli</i>    | Ca_Kabuli_Chr05              | 31377103                       | (C/T)       |
| 8502        | CakSNP8502     | <i>Kabuli</i>    | Ca_Kabuli_Chr05              | 31377122                       | (C/T)       |
| 8503        | CakSNP8503     | <i>Kabuli</i>    | Ca_Kabuli_Chr05              | 31377134                       | (A/T)       |
| 8504        | CakSNP8504     | <i>Kabuli</i>    | Ca_Kabuli_Chr05              | 31390221                       | (A/G)       |
| 8505        | CakSNP8505     | <i>Kabuli</i>    | Ca_Kabuli_Chr05              | 31390319                       | (C/T)       |
| 8506        | CakSNP8506     | <i>Kabuli</i>    | Ca_Kabuli_Chr05              | 31522389                       | (T/G)       |
| 8507        | CakSNP8507     | <i>Kabuli</i>    | Ca_Kabuli_Chr05              | 31548555                       | (G/A)       |
| 8508        | CakSNP8508     | <i>Kabuli</i>    | Ca_Kabuli_Chr05              | 31651335                       | (G/T)       |
| 8509        | CakSNP8509     | <i>Kabuli</i>    | Ca_Kabuli_Chr05              | 31651336                       | (T/G)       |
| 8510        | CakSNP8510     | <i>Kabuli</i>    | Ca_Kabuli_Chr05              | 31653418                       | (T/C)       |
| 8511        | CakSNP8511     | <i>Kabuli</i>    | Ca_Kabuli_Chr05              | 31653423                       | (T/C)       |

| <b>S.N.</b> | <b>SNP IDs</b> | <b>Cultivars</b> | <b>Chromosomes/scaffolds</b> | <b>Physical positions (bp)</b> | <b>SNPs</b> |
|-------------|----------------|------------------|------------------------------|--------------------------------|-------------|
| 8512        | CakSNP8512     | <i>Kabuli</i>    | Ca_Kabuli_Chr05              | 31653432                       | (A/G)       |
| 8513        | CakSNP8513     | <i>Kabuli</i>    | Ca_Kabuli_Chr05              | 31653437                       | (C/T)       |
| 8514        | CakSNP8514     | <i>Kabuli</i>    | Ca_Kabuli_Chr05              | 31653452                       | (C/A)       |
| 8515        | CakSNP8515     | <i>Kabuli</i>    | Ca_Kabuli_Chr05              | 31687881                       | (C/T)       |
| 8516        | CakSNP8516     | <i>Kabuli</i>    | Ca_Kabuli_Chr05              | 31687891                       | (A/C)       |
| 8517        | CakSNP8517     | <i>Kabuli</i>    | Ca_Kabuli_Chr05              | 31696236                       | (T/C)       |
| 8518        | CakSNP8518     | <i>Kabuli</i>    | Ca_Kabuli_Chr05              | 31710670                       | (G/A)       |
| 8519        | CakSNP8519     | <i>Kabuli</i>    | Ca_Kabuli_Chr05              | 31724217                       | (G/A)       |
| 8520        | CakSNP8520     | <i>Kabuli</i>    | Ca_Kabuli_Chr05              | 31724272                       | (C/T)       |
| 8521        | CakSNP8521     | <i>Kabuli</i>    | Ca_Kabuli_Chr05              | 31724332                       | (G/A)       |
| 8522        | CakSNP8522     | <i>Kabuli</i>    | Ca_Kabuli_Chr05              | 31750150                       | (T/G)       |
| 8523        | CakSNP8523     | <i>Kabuli</i>    | Ca_Kabuli_Chr05              | 31750242                       | (A/G)       |
| 8524        | CakSNP8524     | <i>Kabuli</i>    | Ca_Kabuli_Chr05              | 31758166                       | (T/C)       |
| 8525        | CakSNP8525     | <i>Kabuli</i>    | Ca_Kabuli_Chr05              | 31802684                       | (G/T)       |
| 8526        | CakSNP8526     | <i>Kabuli</i>    | Ca_Kabuli_Chr05              | 31802727                       | (G/A)       |
| 8527        | CakSNP8527     | <i>Kabuli</i>    | Ca_Kabuli_Chr05              | 31816202                       | (A/C)       |
| 8528        | CakSNP8528     | <i>Kabuli</i>    | Ca_Kabuli_Chr05              | 31816228                       | (A/G)       |
| 8529        | CakSNP8529     | <i>Kabuli</i>    | Ca_Kabuli_Chr05              | 31935674                       | (T/C)       |
| 8530        | CakSNP8530     | <i>Kabuli</i>    | Ca_Kabuli_Chr05              | 31951925                       | (G/A)       |
| 8531        | CakSNP8531     | <i>Kabuli</i>    | Ca_Kabuli_Chr05              | 31951944                       | (C/T)       |
| 8532        | CakSNP8532     | <i>Kabuli</i>    | Ca_Kabuli_Chr05              | 31985390                       | (G/C)       |
| 8533        | CakSNP8533     | <i>Kabuli</i>    | Ca_Kabuli_Chr05              | 32011781                       | (G/T)       |
| 8534        | CakSNP8534     | <i>Kabuli</i>    | Ca_Kabuli_Chr05              | 32011792                       | (T/G)       |
| 8535        | CakSNP8535     | <i>Kabuli</i>    | Ca_Kabuli_Chr05              | 32015967                       | (T/C)       |
| 8536        | CakSNP8536     | <i>Kabuli</i>    | Ca_Kabuli_Chr05              | 32019864                       | (G/A)       |
| 8537        | CakSNP8537     | <i>Kabuli</i>    | Ca_Kabuli_Chr05              | 32023925                       | (T/C)       |
| 8538        | CakSNP8538     | <i>Kabuli</i>    | Ca_Kabuli_Chr05              | 32090295                       | (C/A)       |
| 8539        | CakSNP8539     | <i>Kabuli</i>    | Ca_Kabuli_Chr05              | 32144081                       | (G/C)       |
| 8540        | CakSNP8540     | <i>Kabuli</i>    | Ca_Kabuli_Chr05              | 32144108                       | (A/C)       |
| 8541        | CakSNP8541     | <i>Kabuli</i>    | Ca_Kabuli_Chr05              | 32144120                       | (C/T)       |
| 8542        | CakSNP8542     | <i>Kabuli</i>    | Ca_Kabuli_Chr05              | 32147522                       | (C/T)       |
| 8543        | CakSNP8543     | <i>Kabuli</i>    | Ca_Kabuli_Chr05              | 32171632                       | (G/A)       |
| 8544        | CakSNP8544     | <i>Kabuli</i>    | Ca_Kabuli_Chr05              | 32171652                       | (T/A)       |
| 8545        | CakSNP8545     | <i>Kabuli</i>    | Ca_Kabuli_Chr05              | 32209547                       | (C/G)       |
| 8546        | CakSNP8546     | <i>Kabuli</i>    | Ca_Kabuli_Chr05              | 32209750                       | (T/C)       |
| 8547        | CakSNP8547     | <i>Kabuli</i>    | Ca_Kabuli_Chr05              | 32229485                       | (A/T)       |
| 8548        | CakSNP8548     | <i>Kabuli</i>    | Ca_Kabuli_Chr05              | 32291158                       | (C/T)       |
| 8549        | CakSNP8549     | <i>Kabuli</i>    | Ca_Kabuli_Chr05              | 32291118                       | (G/A)       |

| <b>S.N.</b> | <b>SNP IDs</b> | <b>Cultivars</b> | <b>Chromosomes/scaffolds</b> | <b>Physical positions (bp)</b> | <b>SNPs</b> |
|-------------|----------------|------------------|------------------------------|--------------------------------|-------------|
| 8550        | CakSNP8550     | <i>Kabuli</i>    | Ca_Kabuli_Chr05              | 32328110                       | (T/C)       |
| 8551        | CakSNP8551     | <i>Kabuli</i>    | Ca_Kabuli_Chr05              | 32346655                       | (A/C)       |
| 8552        | CakSNP8552     | <i>Kabuli</i>    | Ca_Kabuli_Chr05              | 32357511                       | (G/A)       |
| 8553        | CakSNP8553     | <i>Kabuli</i>    | Ca_Kabuli_Chr05              | 32368485                       | (G/C)       |
| 8554        | CakSNP8554     | <i>Kabuli</i>    | Ca_Kabuli_Chr05              | 32369197                       | (C/A)       |
| 8555        | CakSNP8555     | <i>Kabuli</i>    | Ca_Kabuli_Chr05              | 32399391                       | (T/A)       |
| 8556        | CakSNP8556     | <i>Kabuli</i>    | Ca_Kabuli_Chr05              | 32476432                       | (A/G)       |
| 8557        | CakSNP8557     | <i>Kabuli</i>    | Ca_Kabuli_Chr05              | 32476423                       | (A/G)       |
| 8558        | CakSNP8558     | <i>Kabuli</i>    | Ca_Kabuli_Chr05              | 32516773                       | (T/A)       |
| 8559        | CakSNP8559     | <i>Kabuli</i>    | Ca_Kabuli_Chr05              | 32524646                       | (T/C)       |
| 8560        | CakSNP8560     | <i>Kabuli</i>    | Ca_Kabuli_Chr05              | 32566131                       | (C/G)       |
| 8561        | CakSNP8561     | <i>Kabuli</i>    | Ca_Kabuli_Chr05              | 32598221                       | (C/A)       |
| 8562        | CakSNP8562     | <i>Kabuli</i>    | Ca_Kabuli_Chr05              | 32623507                       | (T/G)       |
| 8563        | CakSNP8563     | <i>Kabuli</i>    | Ca_Kabuli_Chr05              | 32631930                       | (C/A)       |
| 8564        | CakSNP8564     | <i>Kabuli</i>    | Ca_Kabuli_Chr05              | 32643759                       | (A/G)       |
| 8565        | CakSNP8565     | <i>Kabuli</i>    | Ca_Kabuli_Chr05              | 32732862                       | (A/T)       |
| 8566        | CakSNP8566     | <i>Kabuli</i>    | Ca_Kabuli_Chr05              | 32732913                       | (A/T)       |
| 8567        | CakSNP8567     | <i>Kabuli</i>    | Ca_Kabuli_Chr05              | 32759420                       | (T/A)       |
| 8568        | CakSNP8568     | <i>Kabuli</i>    | Ca_Kabuli_Chr05              | 32761420                       | (G/A)       |
| 8569        | CakSNP8569     | <i>Kabuli</i>    | Ca_Kabuli_Chr05              | 32794288                       | (G/A)       |
| 8570        | CakSNP8570     | <i>Kabuli</i>    | Ca_Kabuli_Chr05              | 32816626                       | (G/T)       |
| 8571        | CakSNP8571     | <i>Kabuli</i>    | Ca_Kabuli_Chr05              | 32839347                       | (C/A)       |
| 8572        | CakSNP8572     | <i>Kabuli</i>    | Ca_Kabuli_Chr05              | 32840512                       | (A/T)       |
| 8573        | CakSNP8573     | <i>Kabuli</i>    | Ca_Kabuli_Chr05              | 32840522                       | (T/C)       |
| 8574        | CakSNP8574     | <i>Kabuli</i>    | Ca_Kabuli_Chr05              | 32840541                       | (T/G)       |
| 8575        | CakSNP8575     | <i>Kabuli</i>    | Ca_Kabuli_Chr05              | 32859483                       | (T/A)       |
| 8576        | CakSNP8576     | <i>Kabuli</i>    | Ca_Kabuli_Chr05              | 32859504                       | (T/G)       |
| 8577        | CakSNP8577     | <i>Kabuli</i>    | Ca_Kabuli_Chr05              | 32859515                       | (T/G)       |
| 8578        | CakSNP8578     | <i>Kabuli</i>    | Ca_Kabuli_Chr05              | 32860087                       | (C/T)       |
| 8579        | CakSNP8579     | <i>Kabuli</i>    | Ca_Kabuli_Chr05              | 32978975                       | (A/T)       |
| 8580        | CakSNP8580     | <i>Kabuli</i>    | Ca_Kabuli_Chr05              | 33052329                       | (C/G)       |
| 8581        | CakSNP8581     | <i>Kabuli</i>    | Ca_Kabuli_Chr05              | 33143038                       | (A/T)       |
| 8582        | CakSNP8582     | <i>Kabuli</i>    | Ca_Kabuli_Chr05              | 33189733                       | (A/G)       |
| 8583        | CakSNP8583     | <i>Kabuli</i>    | Ca_Kabuli_Chr05              | 33189791                       | (G/A)       |
| 8584        | CakSNP8584     | <i>Kabuli</i>    | Ca_Kabuli_Chr05              | 33189808                       | (A/G)       |
| 8585        | CakSNP8585     | <i>Kabuli</i>    | Ca_Kabuli_Chr05              | 33255823                       | (T/G)       |
| 8586        | CakSNP8586     | <i>Kabuli</i>    | Ca_Kabuli_Chr05              | 33255971                       | (G/T)       |
| 8587        | CakSNP8587     | <i>Kabuli</i>    | Ca_Kabuli_Chr05              | 33256053                       | (C/G)       |

| <b>S.N.</b> | <b>SNP IDs</b> | <b>Cultivars</b> | <b>Chromosomes/scaffolds</b> | <b>Physical positions (bp)</b> | <b>SNPs</b> |
|-------------|----------------|------------------|------------------------------|--------------------------------|-------------|
| 8588        | CakSNP8588     | <i>Kabuli</i>    | Ca_Kabuli_Chr05              | 33256089                       | (T/C)       |
| 8589        | CakSNP8589     | <i>Kabuli</i>    | Ca_Kabuli_Chr05              | 33256245                       | (T/C)       |
| 8590        | CakSNP8590     | <i>Kabuli</i>    | Ca_Kabuli_Chr05              | 33256412                       | (A/T)       |
| 8591        | CakSNP8591     | <i>Kabuli</i>    | Ca_Kabuli_Chr05              | 33256388                       | (T/A)       |
| 8592        | CakSNP8592     | <i>Kabuli</i>    | Ca_Kabuli_Chr05              | 33336127                       | (C/G)       |
| 8593        | CakSNP8593     | <i>Kabuli</i>    | Ca_Kabuli_Chr05              | 33336135                       | (G/T)       |
| 8594        | CakSNP8594     | <i>Kabuli</i>    | Ca_Kabuli_Chr05              | 33349598                       | (C/T)       |
| 8595        | CakSNP8595     | <i>Kabuli</i>    | Ca_Kabuli_Chr05              | 33349700                       | (A/G)       |
| 8596        | CakSNP8596     | <i>Kabuli</i>    | Ca_Kabuli_Chr05              | 33379904                       | (A/G)       |
| 8597        | CakSNP8597     | <i>Kabuli</i>    | Ca_Kabuli_Chr05              | 33379873                       | (C/T)       |
| 8598        | CakSNP8598     | <i>Kabuli</i>    | Ca_Kabuli_Chr05              | 33381774                       | (C/T)       |
| 8599        | CakSNP8599     | <i>Kabuli</i>    | Ca_Kabuli_Chr05              | 33422813                       | (C/T)       |
| 8600        | CakSNP8600     | <i>Kabuli</i>    | Ca_Kabuli_Chr05              | 33422780                       | (A/G)       |
| 8601        | CakSNP8601     | <i>Kabuli</i>    | Ca_Kabuli_Chr05              | 33422779                       | (C/T)       |
| 8602        | CakSNP8602     | <i>Kabuli</i>    | Ca_Kabuli_Chr05              | 33422767                       | (T/C)       |
| 8603        | CakSNP8603     | <i>Kabuli</i>    | Ca_Kabuli_Chr05              | 33431897                       | (T/C)       |
| 8604        | CakSNP8604     | <i>Kabuli</i>    | Ca_Kabuli_Chr05              | 33431996                       | (T/C)       |
| 8605        | CakSNP8605     | <i>Kabuli</i>    | Ca_Kabuli_Chr05              | 33523676                       | (T/C)       |
| 8606        | CakSNP8606     | <i>Kabuli</i>    | Ca_Kabuli_Chr05              | 33523686                       | (G/A)       |
| 8607        | CakSNP8607     | <i>Kabuli</i>    | Ca_Kabuli_Chr05              | 33523691                       | (T/C)       |
| 8608        | CakSNP8608     | <i>Kabuli</i>    | Ca_Kabuli_Chr05              | 33532807                       | (A/G)       |
| 8609        | CakSNP8609     | <i>Kabuli</i>    | Ca_Kabuli_Chr05              | 33532804                       | (A/T)       |
| 8610        | CakSNP8610     | <i>Kabuli</i>    | Ca_Kabuli_Chr05              | 33532798                       | (A/T)       |
| 8611        | CakSNP8611     | <i>Kabuli</i>    | Ca_Kabuli_Chr05              | 33574726                       | (T/C)       |
| 8612        | CakSNP8612     | <i>Kabuli</i>    | Ca_Kabuli_Chr05              | 33578061                       | (T/A)       |
| 8613        | CakSNP8613     | <i>Kabuli</i>    | Ca_Kabuli_Chr05              | 33578167                       | (A/T)       |
| 8614        | CakSNP8614     | <i>Kabuli</i>    | Ca_Kabuli_Chr05              | 33578438                       | (T/C)       |
| 8615        | CakSNP8615     | <i>Kabuli</i>    | Ca_Kabuli_Chr05              | 33578477                       | (A/G)       |
| 8616        | CakSNP8616     | <i>Kabuli</i>    | Ca_Kabuli_Chr05              | 33581040                       | (A/G)       |
| 8617        | CakSNP8617     | <i>Kabuli</i>    | Ca_Kabuli_Chr05              | 33626841                       | (C/T)       |
| 8618        | CakSNP8618     | <i>Kabuli</i>    | Ca_Kabuli_Chr05              | 33627132                       | (T/C)       |
| 8619        | CakSNP8619     | <i>Kabuli</i>    | Ca_Kabuli_Chr05              | 33631108                       | (A/G)       |
| 8620        | CakSNP8620     | <i>Kabuli</i>    | Ca_Kabuli_Chr05              | 33631266                       | (T/A)       |
| 8621        | CakSNP8621     | <i>Kabuli</i>    | Ca_Kabuli_Chr05              | 33656560                       | (C/G)       |
| 8622        | CakSNP8622     | <i>Kabuli</i>    | Ca_Kabuli_Chr05              | 33673894                       | (T/C)       |
| 8623        | CakSNP8623     | <i>Kabuli</i>    | Ca_Kabuli_Chr05              | 33700181                       | (G/C)       |
| 8624        | CakSNP8624     | <i>Kabuli</i>    | Ca_Kabuli_Chr05              | 33700196                       | (A/T)       |
| 8625        | CakSNP8625     | <i>Kabuli</i>    | Ca_Kabuli_Chr05              | 33721487                       | (C/T)       |

| <b>S.N.</b> | <b>SNP IDs</b> | <b>Cultivars</b> | <b>Chromosomes/scaffolds</b> | <b>Physical positions (bp)</b> | <b>SNPs</b> |
|-------------|----------------|------------------|------------------------------|--------------------------------|-------------|
| 8626        | CakSNP8626     | <i>Kabuli</i>    | Ca_Kabuli_Chr05              | 33721544                       | (A/G)       |
| 8627        | CakSNP8627     | <i>Kabuli</i>    | Ca_Kabuli_Chr05              | 33771359                       | (T/C)       |
| 8628        | CakSNP8628     | <i>Kabuli</i>    | Ca_Kabuli_Chr05              | 33812108                       | (T/C)       |
| 8629        | CakSNP8629     | <i>Kabuli</i>    | Ca_Kabuli_Chr05              | 33812213                       | (A/C)       |
| 8630        | CakSNP8630     | <i>Kabuli</i>    | Ca_Kabuli_Chr05              | 33812363                       | (T/A)       |
| 8631        | CakSNP8631     | <i>Kabuli</i>    | Ca_Kabuli_Chr05              | 33818742                       | (T/A)       |
| 8632        | CakSNP8632     | <i>Kabuli</i>    | Ca_Kabuli_Chr05              | 33818789                       | (C/G)       |
| 8633        | CakSNP8633     | <i>Kabuli</i>    | Ca_Kabuli_Chr05              | 33818823                       | (A/G)       |
| 8634        | CakSNP8634     | <i>Kabuli</i>    | Ca_Kabuli_Chr05              | 33824516                       | (G/T)       |
| 8635        | CakSNP8635     | <i>Kabuli</i>    | Ca_Kabuli_Chr05              | 33824513                       | (G/A)       |
| 8636        | CakSNP8636     | <i>Kabuli</i>    | Ca_Kabuli_Chr05              | 33824503                       | (G/A)       |
| 8637        | CakSNP8637     | <i>Kabuli</i>    | Ca_Kabuli_Chr05              | 33835816                       | (T/C)       |
| 8638        | CakSNP8638     | <i>Kabuli</i>    | Ca_Kabuli_Chr05              | 33841544                       | (T/G)       |
| 8639        | CakSNP8639     | <i>Kabuli</i>    | Ca_Kabuli_Chr05              | 33844056                       | (A/T)       |
| 8640        | CakSNP8640     | <i>Kabuli</i>    | Ca_Kabuli_Chr05              | 33844059                       | (G/C)       |
| 8641        | CakSNP8641     | <i>Kabuli</i>    | Ca_Kabuli_Chr05              | 33844222                       | (T/C)       |
| 8642        | CakSNP8642     | <i>Kabuli</i>    | Ca_Kabuli_Chr05              | 33844436                       | (T/A)       |
| 8643        | CakSNP8643     | <i>Kabuli</i>    | Ca_Kabuli_Chr05              | 33892596                       | (A/C)       |
| 8644        | CakSNP8644     | <i>Kabuli</i>    | Ca_Kabuli_Chr05              | 33937307                       | (G/A)       |
| 8645        | CakSNP8645     | <i>Kabuli</i>    | Ca_Kabuli_Chr05              | 33937316                       | (G/A)       |
| 8646        | CakSNP8646     | <i>Kabuli</i>    | Ca_Kabuli_Chr05              | 33963525                       | (G/C)       |
| 8647        | CakSNP8647     | <i>Kabuli</i>    | Ca_Kabuli_Chr05              | 33985819                       | (A/G)       |
| 8648        | CakSNP8648     | <i>Kabuli</i>    | Ca_Kabuli_Chr05              | 33986234                       | (C/T)       |
| 8649        | CakSNP8649     | <i>Kabuli</i>    | Ca_Kabuli_Chr05              | 33986253                       | (A/C)       |
| 8650        | CakSNP8650     | <i>Kabuli</i>    | Ca_Kabuli_Chr05              | 34022362                       | (G/T)       |
| 8651        | CakSNP8651     | <i>Kabuli</i>    | Ca_Kabuli_Chr05              | 34040479                       | (A/G)       |
| 8652        | CakSNP8652     | <i>Kabuli</i>    | Ca_Kabuli_Chr05              | 34040508                       | (A/C)       |
| 8653        | CakSNP8653     | <i>Kabuli</i>    | Ca_Kabuli_Chr05              | 34040535                       | (G/A)       |
| 8654        | CakSNP8654     | <i>Kabuli</i>    | Ca_Kabuli_Chr05              | 34041705                       | (G/T)       |
| 8655        | CakSNP8655     | <i>Kabuli</i>    | Ca_Kabuli_Chr05              | 34073378                       | (A/T)       |
| 8656        | CakSNP8656     | <i>Kabuli</i>    | Ca_Kabuli_Chr05              | 34073395                       | (G/A)       |
| 8657        | CakSNP8657     | <i>Kabuli</i>    | Ca_Kabuli_Chr05              | 34073445                       | (A/T)       |
| 8658        | CakSNP8658     | <i>Kabuli</i>    | Ca_Kabuli_Chr05              | 34201989                       | (C/G)       |
| 8659        | CakSNP8659     | <i>Kabuli</i>    | Ca_Kabuli_Chr05              | 34202000                       | (T/C)       |
| 8660        | CakSNP8660     | <i>Kabuli</i>    | Ca_Kabuli_Chr05              | 34202075                       | (T/G)       |
| 8661        | CakSNP8661     | <i>Kabuli</i>    | Ca_Kabuli_Chr05              | 34202222                       | (G/A)       |
| 8662        | CakSNP8662     | <i>Kabuli</i>    | Ca_Kabuli_Chr05              | 34241269                       | (C/G)       |
| 8663        | CakSNP8663     | <i>Kabuli</i>    | Ca_Kabuli_Chr05              | 34244499                       | (C/T)       |

| <b>S.N.</b> | <b>SNP IDs</b> | <b>Cultivars</b> | <b>Chromosomes/scaffolds</b> | <b>Physical positions (bp)</b> | <b>SNPs</b> |
|-------------|----------------|------------------|------------------------------|--------------------------------|-------------|
| 8664        | CakSNP8664     | <i>Kabuli</i>    | Ca_Kabuli_Chr05              | 34244681                       | (G/A)       |
| 8665        | CakSNP8665     | <i>Kabuli</i>    | Ca_Kabuli_Chr05              | 34244670                       | (A/G)       |
| 8666        | CakSNP8666     | <i>Kabuli</i>    | Ca_Kabuli_Chr05              | 34244662                       | (C/G)       |
| 8667        | CakSNP8667     | <i>Kabuli</i>    | Ca_Kabuli_Chr05              | 34244754                       | (T/A)       |
| 8668        | CakSNP8668     | <i>Kabuli</i>    | Ca_Kabuli_Chr05              | 34313779                       | (A/G)       |
| 8669        | CakSNP8669     | <i>Kabuli</i>    | Ca_Kabuli_Chr05              | 34313758                       | (T/G)       |
| 8670        | CakSNP8670     | <i>Kabuli</i>    | Ca_Kabuli_Chr05              | 34334980                       | (A/G)       |
| 8671        | CakSNP8671     | <i>Kabuli</i>    | Ca_Kabuli_Chr05              | 34334993                       | (A/C)       |
| 8672        | CakSNP8672     | <i>Kabuli</i>    | Ca_Kabuli_Chr05              | 34335252                       | (T/A)       |
| 8673        | CakSNP8673     | <i>Kabuli</i>    | Ca_Kabuli_Chr05              | 34418798                       | (G/C)       |
| 8674        | CakSNP8674     | <i>Kabuli</i>    | Ca_Kabuli_Chr05              | 34441581                       | (A/C)       |
| 8675        | CakSNP8675     | <i>Kabuli</i>    | Ca_Kabuli_Chr05              | 34461159                       | (T/C)       |
| 8676        | CakSNP8676     | <i>Kabuli</i>    | Ca_Kabuli_Chr05              | 34482245                       | (G/T)       |
| 8677        | CakSNP8677     | <i>Kabuli</i>    | Ca_Kabuli_Chr05              | 34482217                       | (G/T)       |
| 8678        | CakSNP8678     | <i>Kabuli</i>    | Ca_Kabuli_Chr05              | 34511669                       | (G/T)       |
| 8679        | CakSNP8679     | <i>Kabuli</i>    | Ca_Kabuli_Chr05              | 34511678                       | (T/C)       |
| 8680        | CakSNP8680     | <i>Kabuli</i>    | Ca_Kabuli_Chr05              | 34511693                       | (C/T)       |
| 8681        | CakSNP8681     | <i>Kabuli</i>    | Ca_Kabuli_Chr05              | 34511705                       | (G/T)       |
| 8682        | CakSNP8682     | <i>Kabuli</i>    | Ca_Kabuli_Chr05              | 34521655                       | (T/C)       |
| 8683        | CakSNP8683     | <i>Kabuli</i>    | Ca_Kabuli_Chr05              | 34531222                       | (A/G)       |
| 8684        | CakSNP8684     | <i>Kabuli</i>    | Ca_Kabuli_Chr05              | 34535758                       | (T/C)       |
| 8685        | CakSNP8685     | <i>Kabuli</i>    | Ca_Kabuli_Chr05              | 34535893                       | (G/T)       |
| 8686        | CakSNP8686     | <i>Kabuli</i>    | Ca_Kabuli_Chr05              | 34535878                       | (G/A)       |
| 8687        | CakSNP8687     | <i>Kabuli</i>    | Ca_Kabuli_Chr05              | 34629028                       | (A/G)       |
| 8688        | CakSNP8688     | <i>Kabuli</i>    | Ca_Kabuli_Chr05              | 34673784                       | (T/A)       |
| 8689        | CakSNP8689     | <i>Kabuli</i>    | Ca_Kabuli_Chr05              | 34691234                       | (A/C)       |
| 8690        | CakSNP8690     | <i>Kabuli</i>    | Ca_Kabuli_Chr05              | 34691302                       | (T/C)       |
| 8691        | CakSNP8691     | <i>Kabuli</i>    | Ca_Kabuli_Chr05              | 34691453                       | (G/A)       |
| 8692        | CakSNP8692     | <i>Kabuli</i>    | Ca_Kabuli_Chr05              | 34807071                       | (C/T)       |
| 8693        | CakSNP8693     | <i>Kabuli</i>    | Ca_Kabuli_Chr05              | 34814216                       | (T/C)       |
| 8694        | CakSNP8694     | <i>Kabuli</i>    | Ca_Kabuli_Chr05              | 34824647                       | (C/G)       |
| 8695        | CakSNP8695     | <i>Kabuli</i>    | Ca_Kabuli_Chr05              | 34824749                       | (A/T)       |
| 8696        | CakSNP8696     | <i>Kabuli</i>    | Ca_Kabuli_Chr05              | 34845398                       | (T/G)       |
| 8697        | CakSNP8697     | <i>Kabuli</i>    | Ca_Kabuli_Chr05              | 34879731                       | (A/G)       |
| 8698        | CakSNP8698     | <i>Kabuli</i>    | Ca_Kabuli_Chr05              | 34974615                       | (T/A)       |
| 8699        | CakSNP8699     | <i>Kabuli</i>    | Ca_Kabuli_Chr05              | 34974703                       | (C/T)       |
| 8700        | CakSNP8700     | <i>Kabuli</i>    | Ca_Kabuli_Chr05              | 34974795                       | (A/G)       |
| 8701        | CakSNP8701     | <i>Kabuli</i>    | Ca_Kabuli_Chr05              | 34975712                       | (T/A)       |

| <b>S.N.</b> | <b>SNP IDs</b> | <b>Cultivars</b> | <b>Chromosomes/scaffolds</b> | <b>Physical positions (bp)</b> | <b>SNPs</b> |
|-------------|----------------|------------------|------------------------------|--------------------------------|-------------|
| 8702        | CakSNP8702     | <i>Kabuli</i>    | Ca_Kabuli_Chr05              | 34998725                       | (G/A)       |
| 8703        | CakSNP8703     | <i>Kabuli</i>    | Ca_Kabuli_Chr05              | 35126544                       | (A/C)       |
| 8704        | CakSNP8704     | <i>Kabuli</i>    | Ca_Kabuli_Chr05              | 35164295                       | (C/T)       |
| 8705        | CakSNP8705     | <i>Kabuli</i>    | Ca_Kabuli_Chr05              | 35191371                       | (C/G)       |
| 8706        | CakSNP8706     | <i>Kabuli</i>    | Ca_Kabuli_Chr05              | 35209511                       | (T/C)       |
| 8707        | CakSNP8707     | <i>Kabuli</i>    | Ca_Kabuli_Chr05              | 35213601                       | (C/T)       |
| 8708        | CakSNP8708     | <i>Kabuli</i>    | Ca_Kabuli_Chr05              | 35226049                       | (G/C)       |
| 8709        | CakSNP8709     | <i>Kabuli</i>    | Ca_Kabuli_Chr05              | 35290452                       | (A/G)       |
| 8710        | CakSNP8710     | <i>Kabuli</i>    | Ca_Kabuli_Chr05              | 35296135                       | (A/C)       |
| 8711        | CakSNP8711     | <i>Kabuli</i>    | Ca_Kabuli_Chr05              | 35330946                       | (G/A)       |
| 8712        | CakSNP8712     | <i>Kabuli</i>    | Ca_Kabuli_Chr05              | 35330995                       | (A/C)       |
| 8713        | CakSNP8713     | <i>Kabuli</i>    | Ca_Kabuli_Chr05              | 35340068                       | (A/G)       |
| 8714        | CakSNP8714     | <i>Kabuli</i>    | Ca_Kabuli_Chr05              | 35340065                       | (G/A)       |
| 8715        | CakSNP8715     | <i>Kabuli</i>    | Ca_Kabuli_Chr05              | 35374184                       | (G/A)       |
| 8716        | CakSNP8716     | <i>Kabuli</i>    | Ca_Kabuli_Chr05              | 35438327                       | (G/T)       |
| 8717        | CakSNP8717     | <i>Kabuli</i>    | Ca_Kabuli_Chr05              | 35495900                       | (T/A)       |
| 8718        | CakSNP8718     | <i>Kabuli</i>    | Ca_Kabuli_Chr05              | 35500751                       | (T/C)       |
| 8719        | CakSNP8719     | <i>Kabuli</i>    | Ca_Kabuli_Chr05              | 35534923                       | (T/A)       |
| 8720        | CakSNP8720     | <i>Kabuli</i>    | Ca_Kabuli_Chr05              | 35534897                       | (G/A)       |
| 8721        | CakSNP8721     | <i>Kabuli</i>    | Ca_Kabuli_Chr05              | 35540372                       | (T/C)       |
| 8722        | CakSNP8722     | <i>Kabuli</i>    | Ca_Kabuli_Chr05              | 35543648                       | (T/C)       |
| 8723        | CakSNP8723     | <i>Kabuli</i>    | Ca_Kabuli_Chr05              | 35554534                       | (C/A)       |
| 8724        | CakSNP8724     | <i>Kabuli</i>    | Ca_Kabuli_Chr05              | 35554593                       | (C/T)       |
| 8725        | CakSNP8725     | <i>Kabuli</i>    | Ca_Kabuli_Chr05              | 35555184                       | (A/G)       |
| 8726        | CakSNP8726     | <i>Kabuli</i>    | Ca_Kabuli_Chr05              | 35576495                       | (A/G)       |
| 8727        | CakSNP8727     | <i>Kabuli</i>    | Ca_Kabuli_Chr05              | 35617798                       | (A/C)       |
| 8728        | CakSNP8728     | <i>Kabuli</i>    | Ca_Kabuli_Chr05              | 35688558                       | (T/C)       |
| 8729        | CakSNP8729     | <i>Kabuli</i>    | Ca_Kabuli_Chr05              | 35690996                       | (G/A)       |
| 8730        | CakSNP8730     | <i>Kabuli</i>    | Ca_Kabuli_Chr05              | 35691581                       | (T/C)       |
| 8731        | CakSNP8731     | <i>Kabuli</i>    | Ca_Kabuli_Chr05              | 35715495                       | (C/T)       |
| 8732        | CakSNP8732     | <i>Kabuli</i>    | Ca_Kabuli_Chr05              | 35715550                       | (G/C)       |
| 8733        | CakSNP8733     | <i>Kabuli</i>    | Ca_Kabuli_Chr05              | 35715571                       | (A/C)       |
| 8734        | CakSNP8734     | <i>Kabuli</i>    | Ca_Kabuli_Chr05              | 35715563                       | (G/A)       |
| 8735        | CakSNP8735     | <i>Kabuli</i>    | Ca_Kabuli_Chr05              | 35715548                       | (T/C)       |
| 8736        | CakSNP8736     | <i>Kabuli</i>    | Ca_Kabuli_Chr05              | 35773040                       | (C/A)       |
| 8737        | CakSNP8737     | <i>Kabuli</i>    | Ca_Kabuli_Chr05              | 35773044                       | (A/G)       |
| 8738        | CakSNP8738     | <i>Kabuli</i>    | Ca_Kabuli_Chr05              | 35775200                       | (T/C)       |
| 8739        | CakSNP8739     | <i>Kabuli</i>    | Ca_Kabuli_Chr05              | 35775191                       | (T/G)       |



| <b>S.N.</b> | <b>SNP IDs</b> | <b>Cultivars</b> | <b>Chromosomes/scaffolds</b> | <b>Physical positions (bp)</b> | <b>SNPs</b> |
|-------------|----------------|------------------|------------------------------|--------------------------------|-------------|
| 8740        | CakSNP8740     | <i>Kabuli</i>    | Ca_Kabuli_Chr05              | 35775266                       | (G/A)       |
| 8741        | CakSNP8741     | <i>Kabuli</i>    | Ca_Kabuli_Chr05              | 35789373                       | (T/A)       |
| 8742        | CakSNP8742     | <i>Kabuli</i>    | Ca_Kabuli_Chr05              | 35789775                       | (A/G)       |
| 8743        | CakSNP8743     | <i>Kabuli</i>    | Ca_Kabuli_Chr05              | 35839230                       | (T/C)       |
| 8744        | CakSNP8744     | <i>Kabuli</i>    | Ca_Kabuli_Chr05              | 35839233                       | (G/A)       |
| 8745        | CakSNP8745     | <i>Kabuli</i>    | Ca_Kabuli_Chr05              | 35844295                       | (G/T)       |
| 8746        | CakSNP8746     | <i>Kabuli</i>    | Ca_Kabuli_Chr05              | 35845094                       | (G/A)       |
| 8747        | CakSNP8747     | <i>Kabuli</i>    | Ca_Kabuli_Chr05              | 35845780                       | (T/C)       |
| 8748        | CakSNP8748     | <i>Kabuli</i>    | Ca_Kabuli_Chr05              | 35845801                       | (T/C)       |
| 8749        | CakSNP8749     | <i>Kabuli</i>    | Ca_Kabuli_Chr05              | 35846404                       | (A/G)       |
| 8750        | CakSNP8750     | <i>Kabuli</i>    | Ca_Kabuli_Chr05              | 35868865                       | (G/A)       |
| 8751        | CakSNP8751     | <i>Kabuli</i>    | Ca_Kabuli_Chr05              | 35877505                       | (T/C)       |
| 8752        | CakSNP8752     | <i>Kabuli</i>    | Ca_Kabuli_Chr05              | 35926105                       | (T/C)       |
| 8753        | CakSNP8753     | <i>Kabuli</i>    | Ca_Kabuli_Chr05              | 35937904                       | (C/T)       |
| 8754        | CakSNP8754     | <i>Kabuli</i>    | Ca_Kabuli_Chr05              | 35937842                       | (G/T)       |
| 8755        | CakSNP8755     | <i>Kabuli</i>    | Ca_Kabuli_Chr05              | 35947574                       | (G/A)       |
| 8756        | CakSNP8756     | <i>Kabuli</i>    | Ca_Kabuli_Chr05              | 35954656                       | (T/C)       |
| 8757        | CakSNP8757     | <i>Kabuli</i>    | Ca_Kabuli_Chr05              | 35956534                       | (C/T)       |
| 8758        | CakSNP8758     | <i>Kabuli</i>    | Ca_Kabuli_Chr05              | 36012698                       | (C/G)       |
| 8759        | CakSNP8759     | <i>Kabuli</i>    | Ca_Kabuli_Chr05              | 36039365                       | (A/C)       |
| 8760        | CakSNP8760     | <i>Kabuli</i>    | Ca_Kabuli_Chr05              | 36128655                       | (G/T)       |
| 8761        | CakSNP8761     | <i>Kabuli</i>    | Ca_Kabuli_Chr05              | 36131156                       | (A/C)       |
| 8762        | CakSNP8762     | <i>Kabuli</i>    | Ca_Kabuli_Chr05              | 36217803                       | (C/T)       |
| 8763        | CakSNP8763     | <i>Kabuli</i>    | Ca_Kabuli_Chr05              | 36238656                       | (G/A)       |
| 8764        | CakSNP8764     | <i>Kabuli</i>    | Ca_Kabuli_Chr05              | 36238655                       | (G/C)       |
| 8765        | CakSNP8765     | <i>Kabuli</i>    | Ca_Kabuli_Chr05              | 36248568                       | (C/T)       |
| 8766        | CakSNP8766     | <i>Kabuli</i>    | Ca_Kabuli_Chr05              | 36292611                       | (C/G)       |
| 8767        | CakSNP8767     | <i>Kabuli</i>    | Ca_Kabuli_Chr05              | 36334569                       | (C/A)       |
| 8768        | CakSNP8768     | <i>Kabuli</i>    | Ca_Kabuli_Chr05              | 36334592                       | (C/T)       |
| 8769        | CakSNP8769     | <i>Kabuli</i>    | Ca_Kabuli_Chr05              | 36334625                       | (A/G)       |
| 8770        | CakSNP8770     | <i>Kabuli</i>    | Ca_Kabuli_Chr05              | 36338598                       | (A/C)       |
| 8771        | CakSNP8771     | <i>Kabuli</i>    | Ca_Kabuli_Chr05              | 36338658                       | (A/G)       |
| 8772        | CakSNP8772     | <i>Kabuli</i>    | Ca_Kabuli_Chr05              | 36397489                       | (A/C)       |
| 8773        | CakSNP8773     | <i>Kabuli</i>    | Ca_Kabuli_Chr05              | 36400943                       | (C/T)       |
| 8774        | CakSNP8774     | <i>Kabuli</i>    | Ca_Kabuli_Chr05              | 36408701                       | (G/A)       |
| 8775        | CakSNP8775     | <i>Kabuli</i>    | Ca_Kabuli_Chr05              | 36408719                       | (G/A)       |
| 8776        | CakSNP8776     | <i>Kabuli</i>    | Ca_Kabuli_Chr05              | 36408724                       | (T/C)       |
| 8777        | CakSNP8777     | <i>Kabuli</i>    | Ca_Kabuli_Chr05              | 36408736                       | (C/A)       |

| <b>S.N.</b> | <b>SNP IDs</b> | <b>Cultivars</b> | <b>Chromosomes/scaffolds</b> | <b>Physical positions (bp)</b> | <b>SNPs</b> |
|-------------|----------------|------------------|------------------------------|--------------------------------|-------------|
| 8778        | CakSNP8778     | <i>Kabuli</i>    | Ca_Kabuli_Chr05              | 36430677                       | (A/C)       |
| 8779        | CakSNP8779     | <i>Kabuli</i>    | Ca_Kabuli_Chr05              | 36441063                       | (C/T)       |
| 8780        | CakSNP8780     | <i>Kabuli</i>    | Ca_Kabuli_Chr05              | 36533996                       | (T/A)       |
| 8781        | CakSNP8781     | <i>Kabuli</i>    | Ca_Kabuli_Chr05              | 36534056                       | (G/C)       |
| 8782        | CakSNP8782     | <i>Kabuli</i>    | Ca_Kabuli_Chr05              | 36534057                       | (T/G)       |
| 8783        | CakSNP8783     | <i>Kabuli</i>    | Ca_Kabuli_Chr05              | 36534060                       | (G/A)       |
| 8784        | CakSNP8784     | <i>Kabuli</i>    | Ca_Kabuli_Chr05              | 36534063                       | (C/T)       |
| 8785        | CakSNP8785     | <i>Kabuli</i>    | Ca_Kabuli_Chr05              | 36534126                       | (A/G)       |
| 8786        | CakSNP8786     | <i>Kabuli</i>    | Ca_Kabuli_Chr05              | 36534110                       | (T/C)       |
| 8787        | CakSNP8787     | <i>Kabuli</i>    | Ca_Kabuli_Chr05              | 36566175                       | (G/A)       |
| 8788        | CakSNP8788     | <i>Kabuli</i>    | Ca_Kabuli_Chr05              | 36613610                       | (T/C)       |
| 8789        | CakSNP8789     | <i>Kabuli</i>    | Ca_Kabuli_Chr05              | 36619837                       | (A/G)       |
| 8790        | CakSNP8790     | <i>Kabuli</i>    | Ca_Kabuli_Chr05              | 36621872                       | (A/T)       |
| 8791        | CakSNP8791     | <i>Kabuli</i>    | Ca_Kabuli_Chr05              | 36672147                       | (C/T)       |
| 8792        | CakSNP8792     | <i>Kabuli</i>    | Ca_Kabuli_Chr05              | 36672164                       | (A/G)       |
| 8793        | CakSNP8793     | <i>Kabuli</i>    | Ca_Kabuli_Chr05              | 36673950                       | (C/A)       |
| 8794        | CakSNP8794     | <i>Kabuli</i>    | Ca_Kabuli_Chr05              | 36731961                       | (T/C)       |
| 8795        | CakSNP8795     | <i>Kabuli</i>    | Ca_Kabuli_Chr05              | 36735459                       | (A/T)       |
| 8796        | CakSNP8796     | <i>Kabuli</i>    | Ca_Kabuli_Chr05              | 36751625                       | (C/T)       |
| 8797        | CakSNP8797     | <i>Kabuli</i>    | Ca_Kabuli_Chr05              | 36751851                       | (T/A)       |
| 8798        | CakSNP8798     | <i>Kabuli</i>    | Ca_Kabuli_Chr05              | 36757408                       | (G/A)       |
| 8799        | CakSNP8799     | <i>Kabuli</i>    | Ca_Kabuli_Chr05              | 36797173                       | (A/G)       |
| 8800        | CakSNP8800     | <i>Kabuli</i>    | Ca_Kabuli_Chr05              | 36797187                       | (G/T)       |
| 8801        | CakSNP8801     | <i>Kabuli</i>    | Ca_Kabuli_Chr05              | 36800497                       | (G/T)       |
| 8802        | CakSNP8802     | <i>Kabuli</i>    | Ca_Kabuli_Chr05              | 36842784                       | (G/T)       |
| 8803        | CakSNP8803     | <i>Kabuli</i>    | Ca_Kabuli_Chr05              | 36855028                       | (G/A)       |
| 8804        | CakSNP8804     | <i>Kabuli</i>    | Ca_Kabuli_Chr05              | 36916560                       | (T/C)       |
| 8805        | CakSNP8805     | <i>Kabuli</i>    | Ca_Kabuli_Chr05              | 36999074                       | (G/C)       |
| 8806        | CakSNP8806     | <i>Kabuli</i>    | Ca_Kabuli_Chr05              | 37016704                       | (C/G)       |
| 8807        | CakSNP8807     | <i>Kabuli</i>    | Ca_Kabuli_Chr05              | 37039246                       | (A/T)       |
| 8808        | CakSNP8808     | <i>Kabuli</i>    | Ca_Kabuli_Chr05              | 37039300                       | (A/G)       |
| 8809        | CakSNP8809     | <i>Kabuli</i>    | Ca_Kabuli_Chr05              | 37040045                       | (G/A)       |
| 8810        | CakSNP8810     | <i>Kabuli</i>    | Ca_Kabuli_Chr05              | 37067293                       | (A/G)       |
| 8811        | CakSNP8811     | <i>Kabuli</i>    | Ca_Kabuli_Chr05              | 37067371                       | (T/C)       |
| 8812        | CakSNP8812     | <i>Kabuli</i>    | Ca_Kabuli_Chr05              | 37067384                       | (G/C)       |
| 8813        | CakSNP8813     | <i>Kabuli</i>    | Ca_Kabuli_Chr05              | 37083276                       | (T/G)       |
| 8814        | CakSNP8814     | <i>Kabuli</i>    | Ca_Kabuli_Chr05              | 37083275                       | (G/T)       |
| 8815        | CakSNP8815     | <i>Kabuli</i>    | Ca_Kabuli_Chr05              | 37114574                       | (A/G)       |

| <b>S.N.</b> | <b>SNP IDs</b> | <b>Cultivars</b> | <b>Chromosomes/scaffolds</b> | <b>Physical positions (bp)</b> | <b>SNPs</b> |
|-------------|----------------|------------------|------------------------------|--------------------------------|-------------|
| 8816        | CakSNP8816     | <i>Kabuli</i>    | Ca_Kabuli_Chr05              | 37126371                       | (A/G)       |
| 8817        | CakSNP8817     | <i>Kabuli</i>    | Ca_Kabuli_Chr05              | 37126354                       | (T/C)       |
| 8818        | CakSNP8818     | <i>Kabuli</i>    | Ca_Kabuli_Chr05              | 37147572                       | (C/T)       |
| 8819        | CakSNP8819     | <i>Kabuli</i>    | Ca_Kabuli_Chr05              | 37167061                       | (A/G)       |
| 8820        | CakSNP8820     | <i>Kabuli</i>    | Ca_Kabuli_Chr05              | 37167114                       | (A/T)       |
| 8821        | CakSNP8821     | <i>Kabuli</i>    | Ca_Kabuli_Chr05              | 37167108                       | (A/T)       |
| 8822        | CakSNP8822     | <i>Kabuli</i>    | Ca_Kabuli_Chr05              | 37194939                       | (G/A)       |
| 8823        | CakSNP8823     | <i>Kabuli</i>    | Ca_Kabuli_Chr05              | 37194917                       | (G/A)       |
| 8824        | CakSNP8824     | <i>Kabuli</i>    | Ca_Kabuli_Chr05              | 37197321                       | (C/A)       |
| 8825        | CakSNP8825     | <i>Kabuli</i>    | Ca_Kabuli_Chr05              | 37207821                       | (A/T)       |
| 8826        | CakSNP8826     | <i>Kabuli</i>    | Ca_Kabuli_Chr05              | 37207837                       | (G/T)       |
| 8827        | CakSNP8827     | <i>Kabuli</i>    | Ca_Kabuli_Chr05              | 37211645                       | (T/G)       |
| 8828        | CakSNP8828     | <i>Kabuli</i>    | Ca_Kabuli_Chr05              | 37213853                       | (C/T)       |
| 8829        | CakSNP8829     | <i>Kabuli</i>    | Ca_Kabuli_Chr05              | 37232307                       | (T/C)       |
| 8830        | CakSNP8830     | <i>Kabuli</i>    | Ca_Kabuli_Chr05              | 37254596                       | (A/G)       |
| 8831        | CakSNP8831     | <i>Kabuli</i>    | Ca_Kabuli_Chr05              | 37260601                       | (T/C)       |
| 8832        | CakSNP8832     | <i>Kabuli</i>    | Ca_Kabuli_Chr05              | 37274572                       | (C/T)       |
| 8833        | CakSNP8833     | <i>Kabuli</i>    | Ca_Kabuli_Chr05              | 37274583                       | (C/T)       |
| 8834        | CakSNP8834     | <i>Kabuli</i>    | Ca_Kabuli_Chr05              | 37274616                       | (C/G)       |
| 8835        | CakSNP8835     | <i>Kabuli</i>    | Ca_Kabuli_Chr05              | 37309917                       | (T/G)       |
| 8836        | CakSNP8836     | <i>Kabuli</i>    | Ca_Kabuli_Chr05              | 37309935                       | (T/G)       |
| 8837        | CakSNP8837     | <i>Kabuli</i>    | Ca_Kabuli_Chr05              | 37332101                       | (G/T)       |
| 8838        | CakSNP8838     | <i>Kabuli</i>    | Ca_Kabuli_Chr05              | 37332198                       | (G/A)       |
| 8839        | CakSNP8839     | <i>Kabuli</i>    | Ca_Kabuli_Chr05              | 37332304                       | (G/A)       |
| 8840        | CakSNP8840     | <i>Kabuli</i>    | Ca_Kabuli_Chr05              | 37332303                       | (A/C)       |
| 8841        | CakSNP8841     | <i>Kabuli</i>    | Ca_Kabuli_Chr05              | 37332370                       | (T/C)       |
| 8842        | CakSNP8842     | <i>Kabuli</i>    | Ca_Kabuli_Chr05              | 37332441                       | (T/C)       |
| 8843        | CakSNP8843     | <i>Kabuli</i>    | Ca_Kabuli_Chr05              | 37332501                       | (C/T)       |
| 8844        | CakSNP8844     | <i>Kabuli</i>    | Ca_Kabuli_Chr05              | 37339022                       | (T/G)       |
| 8845        | CakSNP8845     | <i>Kabuli</i>    | Ca_Kabuli_Chr05              | 37339358                       | (T/G)       |
| 8846        | CakSNP8846     | <i>Kabuli</i>    | Ca_Kabuli_Chr05              | 37339327                       | (A/G)       |
| 8847        | CakSNP8847     | <i>Kabuli</i>    | Ca_Kabuli_Chr05              | 37339300                       | (A/G)       |
| 8848        | CakSNP8848     | <i>Kabuli</i>    | Ca_Kabuli_Chr05              | 37342358                       | (G/T)       |
| 8849        | CakSNP8849     | <i>Kabuli</i>    | Ca_Kabuli_Chr05              | 37363626                       | (C/T)       |
| 8850        | CakSNP8850     | <i>Kabuli</i>    | Ca_Kabuli_Chr05              | 37375575                       | (C/G)       |
| 8851        | CakSNP8851     | <i>Kabuli</i>    | Ca_Kabuli_Chr05              | 37375620                       | (C/T)       |
| 8852        | CakSNP8852     | <i>Kabuli</i>    | Ca_Kabuli_Chr05              | 37445226                       | (A/G)       |
| 8853        | CakSNP8853     | <i>Kabuli</i>    | Ca_Kabuli_Chr05              | 37460980                       | (A/G)       |

| <b>S.N.</b> | <b>SNP IDs</b> | <b>Cultivars</b> | <b>Chromosomes/scaffolds</b> | <b>Physical positions (bp)</b> | <b>SNPs</b> |
|-------------|----------------|------------------|------------------------------|--------------------------------|-------------|
| 8854        | CakSNP8854     | <i>Kabuli</i>    | Ca_Kabuli_Chr05              | 37468727                       | (T/C)       |
| 8855        | CakSNP8855     | <i>Kabuli</i>    | Ca_Kabuli_Chr05              | 37468755                       | (G/A)       |
| 8856        | CakSNP8856     | <i>Kabuli</i>    | Ca_Kabuli_Chr05              | 37555816                       | (T/A)       |
| 8857        | CakSNP8857     | <i>Kabuli</i>    | Ca_Kabuli_Chr05              | 37555846                       | (T/A)       |
| 8858        | CakSNP8858     | <i>Kabuli</i>    | Ca_Kabuli_Chr05              | 37578999                       | (T/G)       |
| 8859        | CakSNP8859     | <i>Kabuli</i>    | Ca_Kabuli_Chr05              | 37591782                       | (A/T)       |
| 8860        | CakSNP8860     | <i>Kabuli</i>    | Ca_Kabuli_Chr05              | 37593444                       | (A/T)       |
| 8861        | CakSNP8861     | <i>Kabuli</i>    | Ca_Kabuli_Chr05              | 37594347                       | (T/C)       |
| 8862        | CakSNP8862     | <i>Kabuli</i>    | Ca_Kabuli_Chr05              | 37604030                       | (T/C)       |
| 8863        | CakSNP8863     | <i>Kabuli</i>    | Ca_Kabuli_Chr05              | 37604090                       | (G/T)       |
| 8864        | CakSNP8864     | <i>Kabuli</i>    | Ca_Kabuli_Chr05              | 37604780                       | (C/T)       |
| 8865        | CakSNP8865     | <i>Kabuli</i>    | Ca_Kabuli_Chr05              | 37796337                       | (T/G)       |
| 8866        | CakSNP8866     | <i>Kabuli</i>    | Ca_Kabuli_Chr05              | 37798313                       | (T/G)       |
| 8867        | CakSNP8867     | <i>Kabuli</i>    | Ca_Kabuli_Chr05              | 37868250                       | (C/T)       |
| 8868        | CakSNP8868     | <i>Kabuli</i>    | Ca_Kabuli_Chr05              | 37868256                       | (T/A)       |
| 8869        | CakSNP8869     | <i>Kabuli</i>    | Ca_Kabuli_Chr05              | 37869744                       | (T/C)       |
| 8870        | CakSNP8870     | <i>Kabuli</i>    | Ca_Kabuli_Chr05              | 37872223                       | (C/G)       |
| 8871        | CakSNP8871     | <i>Kabuli</i>    | Ca_Kabuli_Chr05              | 37874564                       | (T/A)       |
| 8872        | CakSNP8872     | <i>Kabuli</i>    | Ca_Kabuli_Chr05              | 37874725                       | (A/C)       |
| 8873        | CakSNP8873     | <i>Kabuli</i>    | Ca_Kabuli_Chr05              | 37874694                       | (C/T)       |
| 8874        | CakSNP8874     | <i>Kabuli</i>    | Ca_Kabuli_Chr05              | 37886417                       | (T/G)       |
| 8875        | CakSNP8875     | <i>Kabuli</i>    | Ca_Kabuli_Chr05              | 37899098                       | (T/C)       |
| 8876        | CakSNP8876     | <i>Kabuli</i>    | Ca_Kabuli_Chr05              | 37899238                       | (T/C)       |
| 8877        | CakSNP8877     | <i>Kabuli</i>    | Ca_Kabuli_Chr05              | 37908818                       | (A/C)       |
| 8878        | CakSNP8878     | <i>Kabuli</i>    | Ca_Kabuli_Chr05              | 37908807                       | (A/T)       |
| 8879        | CakSNP8879     | <i>Kabuli</i>    | Ca_Kabuli_Chr05              | 37911813                       | (A/C)       |
| 8880        | CakSNP8880     | <i>Kabuli</i>    | Ca_Kabuli_Chr05              | 38018552                       | (A/T)       |
| 8881        | CakSNP8881     | <i>Kabuli</i>    | Ca_Kabuli_Chr05              | 38018558                       | (G/C)       |
| 8882        | CakSNP8882     | <i>Kabuli</i>    | Ca_Kabuli_Chr05              | 38057582                       | (C/T)       |
| 8883        | CakSNP8883     | <i>Kabuli</i>    | Ca_Kabuli_Chr05              | 38080226                       | (A/G)       |
| 8884        | CakSNP8884     | <i>Kabuli</i>    | Ca_Kabuli_Chr05              | 38080349                       | (C/T)       |
| 8885        | CakSNP8885     | <i>Kabuli</i>    | Ca_Kabuli_Chr05              | 38092606                       | (G/A)       |
| 8886        | CakSNP8886     | <i>Kabuli</i>    | Ca_Kabuli_Chr05              | 38092619                       | (T/C)       |
| 8887        | CakSNP8887     | <i>Kabuli</i>    | Ca_Kabuli_Chr05              | 38092732                       | (C/T)       |
| 8888        | CakSNP8888     | <i>Kabuli</i>    | Ca_Kabuli_Chr05              | 38092735                       | (C/T)       |
| 8889        | CakSNP8889     | <i>Kabuli</i>    | Ca_Kabuli_Chr05              | 38092793                       | (C/T)       |
| 8890        | CakSNP8890     | <i>Kabuli</i>    | Ca_Kabuli_Chr05              | 38102941                       | (T/G)       |
| 8891        | CakSNP8891     | <i>Kabuli</i>    | Ca_Kabuli_Chr05              | 38108396                       | (G/A)       |

| <b>S.N.</b> | <b>SNP IDs</b> | <b>Cultivars</b> | <b>Chromosomes/scaffolds</b> | <b>Physical positions (bp)</b> | <b>SNPs</b> |
|-------------|----------------|------------------|------------------------------|--------------------------------|-------------|
| 8892        | CakSNP8892     | <i>Kabuli</i>    | Ca_Kabuli_Chr05              | 38110219                       | (T/G)       |
| 8893        | CakSNP8893     | <i>Kabuli</i>    | Ca_Kabuli_Chr05              | 38220843                       | (G/A)       |
| 8894        | CakSNP8894     | <i>Kabuli</i>    | Ca_Kabuli_Chr05              | 38220908                       | (G/T)       |
| 8895        | CakSNP8895     | <i>Kabuli</i>    | Ca_Kabuli_Chr05              | 38248895                       | (A/C)       |
| 8896        | CakSNP8896     | <i>Kabuli</i>    | Ca_Kabuli_Chr05              | 38249134                       | (T/C)       |
| 8897        | CakSNP8897     | <i>Kabuli</i>    | Ca_Kabuli_Chr05              | 38249132                       | (A/C)       |
| 8898        | CakSNP8898     | <i>Kabuli</i>    | Ca_Kabuli_Chr05              | 38266153                       | (G/A)       |
| 8899        | CakSNP8899     | <i>Kabuli</i>    | Ca_Kabuli_Chr05              | 38307036                       | (G/A)       |
| 8900        | CakSNP8900     | <i>Kabuli</i>    | Ca_Kabuli_Chr05              | 38333718                       | (C/T)       |
| 8901        | CakSNP8901     | <i>Kabuli</i>    | Ca_Kabuli_Chr05              | 38333746                       | (G/A)       |
| 8902        | CakSNP8902     | <i>Kabuli</i>    | Ca_Kabuli_Chr05              | 38333774                       | (A/G)       |
| 8903        | CakSNP8903     | <i>Kabuli</i>    | Ca_Kabuli_Chr05              | 38347201                       | (A/C)       |
| 8904        | CakSNP8904     | <i>Kabuli</i>    | Ca_Kabuli_Chr05              | 38455563                       | (A/C)       |
| 8905        | CakSNP8905     | <i>Kabuli</i>    | Ca_Kabuli_Chr05              | 38509657                       | (A/C)       |
| 8906        | CakSNP8906     | <i>Kabuli</i>    | Ca_Kabuli_Chr05              | 38538904                       | (A/G)       |
| 8907        | CakSNP8907     | <i>Kabuli</i>    | Ca_Kabuli_Chr05              | 38551438                       | (C/T)       |
| 8908        | CakSNP8908     | <i>Kabuli</i>    | Ca_Kabuli_Chr05              | 38551381                       | (G/A)       |
| 8909        | CakSNP8909     | <i>Kabuli</i>    | Ca_Kabuli_Chr05              | 38647040                       | (A/C)       |
| 8910        | CakSNP8910     | <i>Kabuli</i>    | Ca_Kabuli_Chr05              | 38656599                       | (C/T)       |
| 8911        | CakSNP8911     | <i>Kabuli</i>    | Ca_Kabuli_Chr05              | 38783604                       | (C/A)       |
| 8912        | CakSNP8912     | <i>Kabuli</i>    | Ca_Kabuli_Chr05              | 38784078                       | (G/A)       |
| 8913        | CakSNP8913     | <i>Kabuli</i>    | Ca_Kabuli_Chr05              | 38784074                       | (A/G)       |
| 8914        | CakSNP8914     | <i>Kabuli</i>    | Ca_Kabuli_Chr05              | 38784150                       | (T/A)       |
| 8915        | CakSNP8915     | <i>Kabuli</i>    | Ca_Kabuli_Chr05              | 38784129                       | (G/C)       |
| 8916        | CakSNP8916     | <i>Kabuli</i>    | Ca_Kabuli_Chr05              | 38857904                       | (T/C)       |
| 8917        | CakSNP8917     | <i>Kabuli</i>    | Ca_Kabuli_Chr05              | 38872143                       | (A/G)       |
| 8918        | CakSNP8918     | <i>Kabuli</i>    | Ca_Kabuli_Chr05              | 38892604                       | (A/C)       |
| 8919        | CakSNP8919     | <i>Kabuli</i>    | Ca_Kabuli_Chr05              | 38898971                       | (G/A)       |
| 8920        | CakSNP8920     | <i>Kabuli</i>    | Ca_Kabuli_Chr05              | 38909701                       | (C/T)       |
| 8921        | CakSNP8921     | <i>Kabuli</i>    | Ca_Kabuli_Chr05              | 38937304                       | (C/G)       |
| 8922        | CakSNP8922     | <i>Kabuli</i>    | Ca_Kabuli_Chr05              | 38937398                       | (C/A)       |
| 8923        | CakSNP8923     | <i>Kabuli</i>    | Ca_Kabuli_Chr05              | 38939578                       | (C/A)       |
| 8924        | CakSNP8924     | <i>Kabuli</i>    | Ca_Kabuli_Chr05              | 38984762                       | (A/G)       |
| 8925        | CakSNP8925     | <i>Kabuli</i>    | Ca_Kabuli_Chr05              | 38984769                       | (A/C)       |
| 8926        | CakSNP8926     | <i>Kabuli</i>    | Ca_Kabuli_Chr05              | 38984776                       | (A/G)       |
| 8927        | CakSNP8927     | <i>Kabuli</i>    | Ca_Kabuli_Chr05              | 39008980                       | (G/A)       |
| 8928        | CakSNP8928     | <i>Kabuli</i>    | Ca_Kabuli_Chr05              | 39137170                       | (A/G)       |
| 8929        | CakSNP8929     | <i>Kabuli</i>    | Ca_Kabuli_Chr05              | 39175007                       | (A/T)       |

| <b>S.N.</b> | <b>SNP IDs</b> | <b>Cultivars</b> | <b>Chromosomes/scaffolds</b> | <b>Physical positions (bp)</b> | <b>SNPs</b> |
|-------------|----------------|------------------|------------------------------|--------------------------------|-------------|
| 8930        | CakSNP8930     | <i>Kabuli</i>    | Ca_Kabuli_Chr05              | 39176391                       | (T/A)       |
| 8931        | CakSNP8931     | <i>Kabuli</i>    | Ca_Kabuli_Chr05              | 39266333                       | (T/C)       |
| 8932        | CakSNP8932     | <i>Kabuli</i>    | Ca_Kabuli_Chr05              | 39277581                       | (T/C)       |
| 8933        | CakSNP8933     | <i>Kabuli</i>    | Ca_Kabuli_Chr05              | 39283856                       | (G/A)       |
| 8934        | CakSNP8934     | <i>Kabuli</i>    | Ca_Kabuli_Chr05              | 39326933                       | (G/T)       |
| 8935        | CakSNP8935     | <i>Kabuli</i>    | Ca_Kabuli_Chr05              | 39353755                       | (T/G)       |
| 8936        | CakSNP8936     | <i>Kabuli</i>    | Ca_Kabuli_Chr05              | 39364522                       | (T/C)       |
| 8937        | CakSNP8937     | <i>Kabuli</i>    | Ca_Kabuli_Chr05              | 39364569                       | (G/A)       |
| 8938        | CakSNP8938     | <i>Kabuli</i>    | Ca_Kabuli_Chr05              | 39364571                       | (C/A)       |
| 8939        | CakSNP8939     | <i>Kabuli</i>    | Ca_Kabuli_Chr05              | 39364720                       | (A/T)       |
| 8940        | CakSNP8940     | <i>Kabuli</i>    | Ca_Kabuli_Chr05              | 39364700                       | (C/A)       |
| 8941        | CakSNP8941     | <i>Kabuli</i>    | Ca_Kabuli_Chr05              | 39364695                       | (A/C)       |
| 8942        | CakSNP8942     | <i>Kabuli</i>    | Ca_Kabuli_Chr05              | 39364667                       | (T/A)       |
| 8943        | CakSNP8943     | <i>Kabuli</i>    | Ca_Kabuli_Chr05              | 39364741                       | (A/T)       |
| 8944        | CakSNP8944     | <i>Kabuli</i>    | Ca_Kabuli_Chr05              | 39364752                       | (G/T)       |
| 8945        | CakSNP8945     | <i>Kabuli</i>    | Ca_Kabuli_Chr05              | 39364895                       | (A/C)       |
| 8946        | CakSNP8946     | <i>Kabuli</i>    | Ca_Kabuli_Chr05              | 39364856                       | (A/G)       |
| 8947        | CakSNP8947     | <i>Kabuli</i>    | Ca_Kabuli_Chr05              | 39364848                       | (C/T)       |
| 8948        | CakSNP8948     | <i>Kabuli</i>    | Ca_Kabuli_Chr05              | 39364841                       | (A/T)       |
| 8949        | CakSNP8949     | <i>Kabuli</i>    | Ca_Kabuli_Chr05              | 39366353                       | (C/G)       |
| 8950        | CakSNP8950     | <i>Kabuli</i>    | Ca_Kabuli_Chr05              | 39385603                       | (T/G)       |
| 8951        | CakSNP8951     | <i>Kabuli</i>    | Ca_Kabuli_Chr05              | 39385630                       | (C/T)       |
| 8952        | CakSNP8952     | <i>Kabuli</i>    | Ca_Kabuli_Chr05              | 39410377                       | (T/G)       |
| 8953        | CakSNP8953     | <i>Kabuli</i>    | Ca_Kabuli_Chr05              | 39410329                       | (T/G)       |
| 8954        | CakSNP8954     | <i>Kabuli</i>    | Ca_Kabuli_Chr05              | 39460567                       | (A/C)       |
| 8955        | CakSNP8955     | <i>Kabuli</i>    | Ca_Kabuli_Chr05              | 39475960                       | (T/C)       |
| 8956        | CakSNP8956     | <i>Kabuli</i>    | Ca_Kabuli_Chr05              | 39476040                       | (T/G)       |
| 8957        | CakSNP8957     | <i>Kabuli</i>    | Ca_Kabuli_Chr05              | 39498665                       | (G/A)       |
| 8958        | CakSNP8958     | <i>Kabuli</i>    | Ca_Kabuli_Chr05              | 39513563                       | (C/A)       |
| 8959        | CakSNP8959     | <i>Kabuli</i>    | Ca_Kabuli_Chr05              | 39543929                       | (C/T)       |
| 8960        | CakSNP8960     | <i>Kabuli</i>    | Ca_Kabuli_Chr05              | 39576823                       | (C/T)       |
| 8961        | CakSNP8961     | <i>Kabuli</i>    | Ca_Kabuli_Chr05              | 39576836                       | (T/A)       |
| 8962        | CakSNP8962     | <i>Kabuli</i>    | Ca_Kabuli_Chr05              | 39576839                       | (C/T)       |
| 8963        | CakSNP8963     | <i>Kabuli</i>    | Ca_Kabuli_Chr05              | 39576864                       | (C/A)       |
| 8964        | CakSNP8964     | <i>Kabuli</i>    | Ca_Kabuli_Chr05              | 39576870                       | (C/T)       |
| 8965        | CakSNP8965     | <i>Kabuli</i>    | Ca_Kabuli_Chr05              | 39576874                       | (G/T)       |
| 8966        | CakSNP8966     | <i>Kabuli</i>    | Ca_Kabuli_Chr05              | 39576841                       | (G/A)       |
| 8967        | CakSNP8967     | <i>Kabuli</i>    | Ca_Kabuli_Chr05              | 39592439                       | (A/G)       |

| <b>S.N.</b> | <b>SNP IDs</b> | <b>Cultivars</b> | <b>Chromosomes/scaffolds</b> | <b>Physical positions (bp)</b> | <b>SNPs</b> |
|-------------|----------------|------------------|------------------------------|--------------------------------|-------------|
| 8968        | CakSNP8968     | <i>Kabuli</i>    | Ca_Kabuli_Chr05              | 39597485                       | (C/T)       |
| 8969        | CakSNP8969     | <i>Kabuli</i>    | Ca_Kabuli_Chr05              | 39597459                       | (T/C)       |
| 8970        | CakSNP8970     | <i>Kabuli</i>    | Ca_Kabuli_Chr05              | 39608204                       | (A/G)       |
| 8971        | CakSNP8971     | <i>Kabuli</i>    | Ca_Kabuli_Chr05              | 39608209                       | (G/T)       |
| 8972        | CakSNP8972     | <i>Kabuli</i>    | Ca_Kabuli_Chr05              | 39684480                       | (A/G)       |
| 8973        | CakSNP8973     | <i>Kabuli</i>    | Ca_Kabuli_Chr05              | 39684592                       | (A/T)       |
| 8974        | CakSNP8974     | <i>Kabuli</i>    | Ca_Kabuli_Chr05              | 39713021                       | (G/A)       |
| 8975        | CakSNP8975     | <i>Kabuli</i>    | Ca_Kabuli_Chr05              | 39776794                       | (G/A)       |
| 8976        | CakSNP8976     | <i>Kabuli</i>    | Ca_Kabuli_Chr05              | 39776795                       | (G/A)       |
| 8977        | CakSNP8977     | <i>Kabuli</i>    | Ca_Kabuli_Chr05              | 39776818                       | (C/T)       |
| 8978        | CakSNP8978     | <i>Kabuli</i>    | Ca_Kabuli_Chr05              | 39776850                       | (G/A)       |
| 8979        | CakSNP8979     | <i>Kabuli</i>    | Ca_Kabuli_Chr05              | 39776869                       | (C/T)       |
| 8980        | CakSNP8980     | <i>Kabuli</i>    | Ca_Kabuli_Chr05              | 39794718                       | (C/T)       |
| 8981        | CakSNP8981     | <i>Kabuli</i>    | Ca_Kabuli_Chr05              | 39851570                       | (T/G)       |
| 8982        | CakSNP8982     | <i>Kabuli</i>    | Ca_Kabuli_Chr05              | 39869398                       | (C/T)       |
| 8983        | CakSNP8983     | <i>Kabuli</i>    | Ca_Kabuli_Chr05              | 39943298                       | (C/T)       |
| 8984        | CakSNP8984     | <i>Kabuli</i>    | Ca_Kabuli_Chr05              | 39985042                       | (G/A)       |
| 8985        | CakSNP8985     | <i>Kabuli</i>    | Ca_Kabuli_Chr05              | 39985332                       | (A/G)       |
| 8986        | CakSNP8986     | <i>Kabuli</i>    | Ca_Kabuli_Chr05              | 40018264                       | (A/C)       |
| 8987        | CakSNP8987     | <i>Kabuli</i>    | Ca_Kabuli_Chr05              | 40020062                       | (C/T)       |
| 8988        | CakSNP8988     | <i>Kabuli</i>    | Ca_Kabuli_Chr05              | 40020073                       | (C/G)       |
| 8989        | CakSNP8989     | <i>Kabuli</i>    | Ca_Kabuli_Chr05              | 40025250                       | (G/A)       |
| 8990        | CakSNP8990     | <i>Kabuli</i>    | Ca_Kabuli_Chr05              | 40025319                       | (T/C)       |
| 8991        | CakSNP8991     | <i>Kabuli</i>    | Ca_Kabuli_Chr05              | 40025326                       | (C/T)       |
| 8992        | CakSNP8992     | <i>Kabuli</i>    | Ca_Kabuli_Chr05              | 40025376                       | (A/G)       |
| 8993        | CakSNP8993     | <i>Kabuli</i>    | Ca_Kabuli_Chr05              | 40025377                       | (T/A)       |
| 8994        | CakSNP8994     | <i>Kabuli</i>    | Ca_Kabuli_Chr05              | 40027707                       | (A/G)       |
| 8995        | CakSNP8995     | <i>Kabuli</i>    | Ca_Kabuli_Chr05              | 40078085                       | (C/G)       |
| 8996        | CakSNP8996     | <i>Kabuli</i>    | Ca_Kabuli_Chr05              | 40078077                       | (A/G)       |
| 8997        | CakSNP8997     | <i>Kabuli</i>    | Ca_Kabuli_Chr05              | 40159260                       | (C/A)       |
| 8998        | CakSNP8998     | <i>Kabuli</i>    | Ca_Kabuli_Chr05              | 40159348                       | (G/A)       |
| 8999        | CakSNP8999     | <i>Kabuli</i>    | Ca_Kabuli_Chr05              | 40162755                       | (T/C)       |
| 9000        | CakSNP9000     | <i>Kabuli</i>    | Ca_Kabuli_Chr05              | 40162995                       | (C/T)       |
| 9001        | CakSNP9001     | <i>Kabuli</i>    | Ca_Kabuli_Chr05              | 40164176                       | (C/G)       |
| 9002        | CakSNP9002     | <i>Kabuli</i>    | Ca_Kabuli_Chr05              | 40239397                       | (G/C)       |
| 9003        | CakSNP9003     | <i>Kabuli</i>    | Ca_Kabuli_Chr05              | 40290082                       | (G/A)       |
| 9004        | CakSNP9004     | <i>Kabuli</i>    | Ca_Kabuli_Chr05              | 40290066                       | (A/G)       |
| 9005        | CakSNP9005     | <i>Kabuli</i>    | Ca_Kabuli_Chr05              | 40404136                       | (C/T)       |

| <b>S.N.</b> | <b>SNP IDs</b> | <b>Cultivars</b> | <b>Chromosomes/scaffolds</b> | <b>Physical positions (bp)</b> | <b>SNPs</b> |
|-------------|----------------|------------------|------------------------------|--------------------------------|-------------|
| 9006        | CakSNP9006     | <i>Kabuli</i>    | Ca_Kabuli_Chr05              | 40404105                       | (G/C)       |
| 9007        | CakSNP9007     | <i>Kabuli</i>    | Ca_Kabuli_Chr05              | 40410891                       | (C/A)       |
| 9008        | CakSNP9008     | <i>Kabuli</i>    | Ca_Kabuli_Chr05              | 40410895                       | (G/T)       |
| 9009        | CakSNP9009     | <i>Kabuli</i>    | Ca_Kabuli_Chr05              | 40411325                       | (G/C)       |
| 9010        | CakSNP9010     | <i>Kabuli</i>    | Ca_Kabuli_Chr05              | 40464608                       | (A/G)       |
| 9011        | CakSNP9011     | <i>Kabuli</i>    | Ca_Kabuli_Chr05              | 40505498                       | (T/G)       |
| 9012        | CakSNP9012     | <i>Kabuli</i>    | Ca_Kabuli_Chr05              | 40507018                       | (T/A)       |
| 9013        | CakSNP9013     | <i>Kabuli</i>    | Ca_Kabuli_Chr05              | 40507107                       | (A/G)       |
| 9014        | CakSNP9014     | <i>Kabuli</i>    | Ca_Kabuli_Chr05              | 40507116                       | (A/G)       |
| 9015        | CakSNP9015     | <i>Kabuli</i>    | Ca_Kabuli_Chr05              | 40507158                       | (A/G)       |
| 9016        | CakSNP9016     | <i>Kabuli</i>    | Ca_Kabuli_Chr05              | 40507653                       | (G/C)       |
| 9017        | CakSNP9017     | <i>Kabuli</i>    | Ca_Kabuli_Chr05              | 40507662                       | (C/T)       |
| 9018        | CakSNP9018     | <i>Kabuli</i>    | Ca_Kabuli_Chr05              | 40507683                       | (G/T)       |
| 9019        | CakSNP9019     | <i>Kabuli</i>    | Ca_Kabuli_Chr05              | 40532435                       | (A/G)       |
| 9020        | CakSNP9020     | <i>Kabuli</i>    | Ca_Kabuli_Chr05              | 40543989                       | (G/T)       |
| 9021        | CakSNP9021     | <i>Kabuli</i>    | Ca_Kabuli_Chr05              | 40553279                       | (C/G)       |
| 9022        | CakSNP9022     | <i>Kabuli</i>    | Ca_Kabuli_Chr05              | 40631069                       | (G/C)       |
| 9023        | CakSNP9023     | <i>Kabuli</i>    | Ca_Kabuli_Chr05              | 40666160                       | (T/A)       |
| 9024        | CakSNP9024     | <i>Kabuli</i>    | Ca_Kabuli_Chr05              | 40666171                       | (T/C)       |
| 9025        | CakSNP9025     | <i>Kabuli</i>    | Ca_Kabuli_Chr05              | 40666174                       | (C/T)       |
| 9026        | CakSNP9026     | <i>Kabuli</i>    | Ca_Kabuli_Chr05              | 40673241                       | (A/G)       |
| 9027        | CakSNP9027     | <i>Kabuli</i>    | Ca_Kabuli_Chr05              | 40700278                       | (C/G)       |
| 9028        | CakSNP9028     | <i>Kabuli</i>    | Ca_Kabuli_Chr05              | 40700260                       | (T/C)       |
| 9029        | CakSNP9029     | <i>Kabuli</i>    | Ca_Kabuli_Chr05              | 40700318                       | (C/A)       |
| 9030        | CakSNP9030     | <i>Kabuli</i>    | Ca_Kabuli_Chr05              | 40700772                       | (C/T)       |
| 9031        | CakSNP9031     | <i>Kabuli</i>    | Ca_Kabuli_Chr05              | 40736291                       | (C/G)       |
| 9032        | CakSNP9032     | <i>Kabuli</i>    | Ca_Kabuli_Chr05              | 40828566                       | (A/C)       |
| 9033        | CakSNP9033     | <i>Kabuli</i>    | Ca_Kabuli_Chr05              | 40828567                       | (G/C)       |
| 9034        | CakSNP9034     | <i>Kabuli</i>    | Ca_Kabuli_Chr05              | 40841690                       | (C/T)       |
| 9035        | CakSNP9035     | <i>Kabuli</i>    | Ca_Kabuli_Chr05              | 40845320                       | (C/T)       |
| 9036        | CakSNP9036     | <i>Kabuli</i>    | Ca_Kabuli_Chr05              | 40883438                       | (C/A)       |
| 9037        | CakSNP9037     | <i>Kabuli</i>    | Ca_Kabuli_Chr05              | 40955055                       | (A/T)       |
| 9038        | CakSNP9038     | <i>Kabuli</i>    | Ca_Kabuli_Chr05              | 40966058                       | (G/A)       |
| 9039        | CakSNP9039     | <i>Kabuli</i>    | Ca_Kabuli_Chr05              | 41024079                       | (A/G)       |
| 9040        | CakSNP9040     | <i>Kabuli</i>    | Ca_Kabuli_Chr05              | 41024135                       | (C/G)       |
| 9041        | CakSNP9041     | <i>Kabuli</i>    | Ca_Kabuli_Chr05              | 41024201                       | (G/A)       |
| 9042        | CakSNP9042     | <i>Kabuli</i>    | Ca_Kabuli_Chr05              | 41054578                       | (A/G)       |
| 9043        | CakSNP9043     | <i>Kabuli</i>    | Ca_Kabuli_Chr05              | 41055111                       | (T/A)       |



| <b>S.N.</b> | <b>SNP IDs</b> | <b>Cultivars</b> | <b>Chromosomes/scaffolds</b> | <b>Physical positions (bp)</b> | <b>SNPs</b> |
|-------------|----------------|------------------|------------------------------|--------------------------------|-------------|
| 9044        | CakSNP9044     | <i>Kabuli</i>    | Ca_Kabuli_Chr05              | 41063657                       | (C/T)       |
| 9045        | CakSNP9045     | <i>Kabuli</i>    | Ca_Kabuli_Chr05              | 41066644                       | (C/G)       |
| 9046        | CakSNP9046     | <i>Kabuli</i>    | Ca_Kabuli_Chr05              | 41066664                       | (T/C)       |
| 9047        | CakSNP9047     | <i>Kabuli</i>    | Ca_Kabuli_Chr05              | 41066667                       | (C/A)       |
| 9048        | CakSNP9048     | <i>Kabuli</i>    | Ca_Kabuli_Chr05              | 41080035                       | (C/T)       |
| 9049        | CakSNP9049     | <i>Kabuli</i>    | Ca_Kabuli_Chr05              | 41191566                       | (A/T)       |
| 9050        | CakSNP9050     | <i>Kabuli</i>    | Ca_Kabuli_Chr05              | 41191676                       | (G/C)       |
| 9051        | CakSNP9051     | <i>Kabuli</i>    | Ca_Kabuli_Chr05              | 41197909                       | (A/T)       |
| 9052        | CakSNP9052     | <i>Kabuli</i>    | Ca_Kabuli_Chr05              | 41203594                       | (C/T)       |
| 9053        | CakSNP9053     | <i>Kabuli</i>    | Ca_Kabuli_Chr05              | 41253742                       | (A/G)       |
| 9054        | CakSNP9054     | <i>Kabuli</i>    | Ca_Kabuli_Chr05              | 41283253                       | (T/C)       |
| 9055        | CakSNP9055     | <i>Kabuli</i>    | Ca_Kabuli_Chr05              | 41283453                       | (A/C)       |
| 9056        | CakSNP9056     | <i>Kabuli</i>    | Ca_Kabuli_Chr05              | 41285223                       | (A/C)       |
| 9057        | CakSNP9057     | <i>Kabuli</i>    | Ca_Kabuli_Chr05              | 41302544                       | (C/G)       |
| 9058        | CakSNP9058     | <i>Kabuli</i>    | Ca_Kabuli_Chr05              | 41302601                       | (G/A)       |
| 9059        | CakSNP9059     | <i>Kabuli</i>    | Ca_Kabuli_Chr05              | 41302733                       | (T/C)       |
| 9060        | CakSNP9060     | <i>Kabuli</i>    | Ca_Kabuli_Chr05              | 41302804                       | (A/G)       |
| 9061        | CakSNP9061     | <i>Kabuli</i>    | Ca_Kabuli_Chr05              | 41302859                       | (C/A)       |
| 9062        | CakSNP9062     | <i>Kabuli</i>    | Ca_Kabuli_Chr05              | 41302901                       | (C/A)       |
| 9063        | CakSNP9063     | <i>Kabuli</i>    | Ca_Kabuli_Chr05              | 41302900                       | (T/A)       |
| 9064        | CakSNP9064     | <i>Kabuli</i>    | Ca_Kabuli_Chr05              | 41302895                       | (G/A)       |
| 9065        | CakSNP9065     | <i>Kabuli</i>    | Ca_Kabuli_Chr05              | 41304103                       | (G/A)       |
| 9066        | CakSNP9066     | <i>Kabuli</i>    | Ca_Kabuli_Chr05              | 41399241                       | (C/T)       |
| 9067        | CakSNP9067     | <i>Kabuli</i>    | Ca_Kabuli_Chr05              | 41407077                       | (A/C)       |
| 9068        | CakSNP9068     | <i>Kabuli</i>    | Ca_Kabuli_Chr05              | 41407253                       | (T/C)       |
| 9069        | CakSNP9069     | <i>Kabuli</i>    | Ca_Kabuli_Chr05              | 41519141                       | (C/T)       |
| 9070        | CakSNP9070     | <i>Kabuli</i>    | Ca_Kabuli_Chr05              | 41521854                       | (T/G)       |
| 9071        | CakSNP9071     | <i>Kabuli</i>    | Ca_Kabuli_Chr05              | 41526026                       | (T/G)       |
| 9072        | CakSNP9072     | <i>Kabuli</i>    | Ca_Kabuli_Chr05              | 41635262                       | (C/T)       |
| 9073        | CakSNP9073     | <i>Kabuli</i>    | Ca_Kabuli_Chr05              | 41678144                       | (C/T)       |
| 9074        | CakSNP9074     | <i>Kabuli</i>    | Ca_Kabuli_Chr05              | 41696426                       | (T/C)       |
| 9075        | CakSNP9075     | <i>Kabuli</i>    | Ca_Kabuli_Chr05              | 41696496                       | (G/C)       |
| 9076        | CakSNP9076     | <i>Kabuli</i>    | Ca_Kabuli_Chr05              | 41701479                       | (T/C)       |
| 9077        | CakSNP9077     | <i>Kabuli</i>    | Ca_Kabuli_Chr05              | 41772759                       | (G/A)       |
| 9078        | CakSNP9078     | <i>Kabuli</i>    | Ca_Kabuli_Chr05              | 41887214                       | (A/T)       |
| 9079        | CakSNP9079     | <i>Kabuli</i>    | Ca_Kabuli_Chr05              | 41902419                       | (A/C)       |
| 9080        | CakSNP9080     | <i>Kabuli</i>    | Ca_Kabuli_Chr05              | 41945316                       | (A/G)       |
| 9081        | CakSNP9081     | <i>Kabuli</i>    | Ca_Kabuli_Chr05              | 41945373                       | (C/T)       |

| <b>S.N.</b> | <b>SNP IDs</b> | <b>Cultivars</b> | <b>Chromosomes/scaffolds</b> | <b>Physical positions (bp)</b> | <b>SNPs</b> |
|-------------|----------------|------------------|------------------------------|--------------------------------|-------------|
| 9082        | CakSNP9082     | <i>Kabuli</i>    | Ca_Kabuli_Chr05              | 41945308                       | (G/A)       |
| 9083        | CakSNP9083     | <i>Kabuli</i>    | Ca_Kabuli_Chr05              | 41974690                       | (T/C)       |
| 9084        | CakSNP9084     | <i>Kabuli</i>    | Ca_Kabuli_Chr05              | 42004600                       | (T/G)       |
| 9085        | CakSNP9085     | <i>Kabuli</i>    | Ca_Kabuli_Chr05              | 42004602                       | (A/G)       |
| 9086        | CakSNP9086     | <i>Kabuli</i>    | Ca_Kabuli_Chr05              | 42004734                       | (G/A)       |
| 9087        | CakSNP9087     | <i>Kabuli</i>    | Ca_Kabuli_Chr05              | 42004742                       | (G/A)       |
| 9088        | CakSNP9088     | <i>Kabuli</i>    | Ca_Kabuli_Chr05              | 42004751                       | (G/A)       |
| 9089        | CakSNP9089     | <i>Kabuli</i>    | Ca_Kabuli_Chr05              | 42004753                       | (C/A)       |
| 9090        | CakSNP9090     | <i>Kabuli</i>    | Ca_Kabuli_Chr05              | 42008626                       | (A/C)       |
| 9091        | CakSNP9091     | <i>Kabuli</i>    | Ca_Kabuli_Chr05              | 42012972                       | (C/A)       |
| 9092        | CakSNP9092     | <i>Kabuli</i>    | Ca_Kabuli_Chr05              | 42012983                       | (G/A)       |
| 9093        | CakSNP9093     | <i>Kabuli</i>    | Ca_Kabuli_Chr05              | 42012998                       | (C/T)       |
| 9094        | CakSNP9094     | <i>Kabuli</i>    | Ca_Kabuli_Chr05              | 42020435                       | (A/G)       |
| 9095        | CakSNP9095     | <i>Kabuli</i>    | Ca_Kabuli_Chr05              | 42100070                       | (A/G)       |
| 9096        | CakSNP9096     | <i>Kabuli</i>    | Ca_Kabuli_Chr05              | 42117516                       | (C/T)       |
| 9097        | CakSNP9097     | <i>Kabuli</i>    | Ca_Kabuli_Chr05              | 42120698                       | (T/C)       |
| 9098        | CakSNP9098     | <i>Kabuli</i>    | Ca_Kabuli_Chr05              | 42120735                       | (G/C)       |
| 9099        | CakSNP9099     | <i>Kabuli</i>    | Ca_Kabuli_Chr05              | 42121472                       | (C/A)       |
| 9100        | CakSNP9100     | <i>Kabuli</i>    | Ca_Kabuli_Chr05              | 42225634                       | (G/A)       |
| 9101        | CakSNP9101     | <i>Kabuli</i>    | Ca_Kabuli_Chr05              | 42275523                       | (G/A)       |
| 9102        | CakSNP9102     | <i>Kabuli</i>    | Ca_Kabuli_Chr05              | 42282297                       | (G/A)       |
| 9103        | CakSNP9103     | <i>Kabuli</i>    | Ca_Kabuli_Chr05              | 42413430                       | (A/C)       |
| 9104        | CakSNP9104     | <i>Kabuli</i>    | Ca_Kabuli_Chr05              | 42422867                       | (C/A)       |
| 9105        | CakSNP9105     | <i>Kabuli</i>    | Ca_Kabuli_Chr05              | 42422845                       | (T/C)       |
| 9106        | CakSNP9106     | <i>Kabuli</i>    | Ca_Kabuli_Chr05              | 42422837                       | (G/A)       |
| 9107        | CakSNP9107     | <i>Kabuli</i>    | Ca_Kabuli_Chr05              | 42422808                       | (A/G)       |
| 9108        | CakSNP9108     | <i>Kabuli</i>    | Ca_Kabuli_Chr05              | 42422932                       | (C/A)       |
| 9109        | CakSNP9109     | <i>Kabuli</i>    | Ca_Kabuli_Chr05              | 42435263                       | (C/T)       |
| 9110        | CakSNP9110     | <i>Kabuli</i>    | Ca_Kabuli_Chr05              | 42436972                       | (A/G)       |
| 9111        | CakSNP9111     | <i>Kabuli</i>    | Ca_Kabuli_Chr05              | 42436976                       | (A/T)       |
| 9112        | CakSNP9112     | <i>Kabuli</i>    | Ca_Kabuli_Chr05              | 42443786                       | (A/G)       |
| 9113        | CakSNP9113     | <i>Kabuli</i>    | Ca_Kabuli_Chr05              | 42477712                       | (G/A)       |
| 9114        | CakSNP9114     | <i>Kabuli</i>    | Ca_Kabuli_Chr05              | 42485130                       | (T/C)       |
| 9115        | CakSNP9115     | <i>Kabuli</i>    | Ca_Kabuli_Chr05              | 42528744                       | (T/G)       |
| 9116        | CakSNP9116     | <i>Kabuli</i>    | Ca_Kabuli_Chr05              | 42528934                       | (A/G)       |
| 9117        | CakSNP9117     | <i>Kabuli</i>    | Ca_Kabuli_Chr05              | 42540675                       | (A/T)       |
| 9118        | CakSNP9118     | <i>Kabuli</i>    | Ca_Kabuli_Chr05              | 42582262                       | (T/A)       |
| 9119        | CakSNP9119     | <i>Kabuli</i>    | Ca_Kabuli_Chr05              | 42655824                       | (A/G)       |

| <b>S.N.</b> | <b>SNP IDs</b> | <b>Cultivars</b> | <b>Chromosomes/scaffolds</b> | <b>Physical positions (bp)</b> | <b>SNPs</b> |
|-------------|----------------|------------------|------------------------------|--------------------------------|-------------|
| 9120        | CakSNP9120     | <i>Kabuli</i>    | Ca_Kabuli_Chr05              | 42749499                       | (C/T)       |
| 9121        | CakSNP9121     | <i>Kabuli</i>    | Ca_Kabuli_Chr05              | 42792635                       | (G/A)       |
| 9122        | CakSNP9122     | <i>Kabuli</i>    | Ca_Kabuli_Chr05              | 42814621                       | (C/T)       |
| 9123        | CakSNP9123     | <i>Kabuli</i>    | Ca_Kabuli_Chr05              | 42814623                       | (A/G)       |
| 9124        | CakSNP9124     | <i>Kabuli</i>    | Ca_Kabuli_Chr05              | 42857977                       | (G/C)       |
| 9125        | CakSNP9125     | <i>Kabuli</i>    | Ca_Kabuli_Chr05              | 42863366                       | (C/T)       |
| 9126        | CakSNP9126     | <i>Kabuli</i>    | Ca_Kabuli_Chr05              | 42872074                       | (A/C)       |
| 9127        | CakSNP9127     | <i>Kabuli</i>    | Ca_Kabuli_Chr05              | 42872091                       | (A/G)       |
| 9128        | CakSNP9128     | <i>Kabuli</i>    | Ca_Kabuli_Chr05              | 42881185                       | (C/T)       |
| 9129        | CakSNP9129     | <i>Kabuli</i>    | Ca_Kabuli_Chr05              | 42882945                       | (C/T)       |
| 9130        | CakSNP9130     | <i>Kabuli</i>    | Ca_Kabuli_Chr05              | 42882965                       | (C/T)       |
| 9131        | CakSNP9131     | <i>Kabuli</i>    | Ca_Kabuli_Chr05              | 42883163                       | (T/C)       |
| 9132        | CakSNP9132     | <i>Kabuli</i>    | Ca_Kabuli_Chr05              | 42910653                       | (A/G)       |
| 9133        | CakSNP9133     | <i>Kabuli</i>    | Ca_Kabuli_Chr05              | 42910661                       | (A/G)       |
| 9134        | CakSNP9134     | <i>Kabuli</i>    | Ca_Kabuli_Chr05              | 42910732                       | (A/T)       |
| 9135        | CakSNP9135     | <i>Kabuli</i>    | Ca_Kabuli_Chr05              | 42924113                       | (C/T)       |
| 9136        | CakSNP9136     | <i>Kabuli</i>    | Ca_Kabuli_Chr05              | 42928986                       | (T/G)       |
| 9137        | CakSNP9137     | <i>Kabuli</i>    | Ca_Kabuli_Chr05              | 42929087                       | (A/C)       |
| 9138        | CakSNP9138     | <i>Kabuli</i>    | Ca_Kabuli_Chr05              | 42946580                       | (T/C)       |
| 9139        | CakSNP9139     | <i>Kabuli</i>    | Ca_Kabuli_Chr05              | 42946716                       | (A/T)       |
| 9140        | CakSNP9140     | <i>Kabuli</i>    | Ca_Kabuli_Chr05              | 42999704                       | (C/T)       |
| 9141        | CakSNP9141     | <i>Kabuli</i>    | Ca_Kabuli_Chr05              | 43000210                       | (A/G)       |
| 9142        | CakSNP9142     | <i>Kabuli</i>    | Ca_Kabuli_Chr05              | 43034618                       | (T/A)       |
| 9143        | CakSNP9143     | <i>Kabuli</i>    | Ca_Kabuli_Chr05              | 43037863                       | (G/A)       |
| 9144        | CakSNP9144     | <i>Kabuli</i>    | Ca_Kabuli_Chr05              | 43060091                       | (C/T)       |
| 9145        | CakSNP9145     | <i>Kabuli</i>    | Ca_Kabuli_Chr05              | 43067894                       | (T/C)       |
| 9146        | CakSNP9146     | <i>Kabuli</i>    | Ca_Kabuli_Chr05              | 43067891                       | (G/C)       |
| 9147        | CakSNP9147     | <i>Kabuli</i>    | Ca_Kabuli_Chr05              | 43067905                       | (A/C)       |
| 9148        | CakSNP9148     | <i>Kabuli</i>    | Ca_Kabuli_Chr05              | 43080493                       | (G/A)       |
| 9149        | CakSNP9149     | <i>Kabuli</i>    | Ca_Kabuli_Chr05              | 43081783                       | (G/A)       |
| 9150        | CakSNP9150     | <i>Kabuli</i>    | Ca_Kabuli_Chr05              | 43110660                       | (G/A)       |
| 9151        | CakSNP9151     | <i>Kabuli</i>    | Ca_Kabuli_Chr05              | 43110669                       | (A/T)       |
| 9152        | CakSNP9152     | <i>Kabuli</i>    | Ca_Kabuli_Chr05              | 43110726                       | (T/G)       |
| 9153        | CakSNP9153     | <i>Kabuli</i>    | Ca_Kabuli_Chr05              | 43110737                       | (A/G)       |
| 9154        | CakSNP9154     | <i>Kabuli</i>    | Ca_Kabuli_Chr05              | 43175781                       | (G/A)       |
| 9155        | CakSNP9155     | <i>Kabuli</i>    | Ca_Kabuli_Chr05              | 43188824                       | (T/G)       |
| 9156        | CakSNP9156     | <i>Kabuli</i>    | Ca_Kabuli_Chr05              | 43188853                       | (C/A)       |
| 9157        | CakSNP9157     | <i>Kabuli</i>    | Ca_Kabuli_Chr05              | 43210793                       | (T/C)       |

| <b>S.N.</b> | <b>SNP IDs</b> | <b>Cultivars</b> | <b>Chromosomes/scaffolds</b> | <b>Physical positions (bp)</b> | <b>SNPs</b> |
|-------------|----------------|------------------|------------------------------|--------------------------------|-------------|
| 9158        | CakSNP9158     | <i>Kabuli</i>    | Ca_Kabuli_Chr05              | 43212083                       | (G/A)       |
| 9159        | CakSNP9159     | <i>Kabuli</i>    | Ca_Kabuli_Chr05              | 43212066                       | (C/T)       |
| 9160        | CakSNP9160     | <i>Kabuli</i>    | Ca_Kabuli_Chr05              | 43221125                       | (T/C)       |
| 9161        | CakSNP9161     | <i>Kabuli</i>    | Ca_Kabuli_Chr05              | 43231220                       | (T/C)       |
| 9162        | CakSNP9162     | <i>Kabuli</i>    | Ca_Kabuli_Chr05              | 43231265                       | (C/T)       |
| 9163        | CakSNP9163     | <i>Kabuli</i>    | Ca_Kabuli_Chr05              | 43253586                       | (C/A)       |
| 9164        | CakSNP9164     | <i>Kabuli</i>    | Ca_Kabuli_Chr05              | 43275472                       | (T/C)       |
| 9165        | CakSNP9165     | <i>Kabuli</i>    | Ca_Kabuli_Chr05              | 43334903                       | (T/C)       |
| 9166        | CakSNP9166     | <i>Kabuli</i>    | Ca_Kabuli_Chr05              | 43341646                       | (A/C)       |
| 9167        | CakSNP9167     | <i>Kabuli</i>    | Ca_Kabuli_Chr05              | 43402230                       | (C/T)       |
| 9168        | CakSNP9168     | <i>Kabuli</i>    | Ca_Kabuli_Chr05              | 43410326                       | (T/G)       |
| 9169        | CakSNP9169     | <i>Kabuli</i>    | Ca_Kabuli_Chr05              | 43423593                       | (G/C)       |
| 9170        | CakSNP9170     | <i>Kabuli</i>    | Ca_Kabuli_Chr05              | 43521774                       | (A/T)       |
| 9171        | CakSNP9171     | <i>Kabuli</i>    | Ca_Kabuli_Chr05              | 43521789                       | (G/A)       |
| 9172        | CakSNP9172     | <i>Kabuli</i>    | Ca_Kabuli_Chr05              | 43521830                       | (T/C)       |
| 9173        | CakSNP9173     | <i>Kabuli</i>    | Ca_Kabuli_Chr05              | 43521851                       | (G/A)       |
| 9174        | CakSNP9174     | <i>Kabuli</i>    | Ca_Kabuli_Chr05              | 43523560                       | (A/G)       |
| 9175        | CakSNP9175     | <i>Kabuli</i>    | Ca_Kabuli_Chr05              | 43530567                       | (C/T)       |
| 9176        | CakSNP9176     | <i>Kabuli</i>    | Ca_Kabuli_Chr05              | 43565712                       | (T/C)       |
| 9177        | CakSNP9177     | <i>Kabuli</i>    | Ca_Kabuli_Chr05              | 43632249                       | (C/A)       |
| 9178        | CakSNP9178     | <i>Kabuli</i>    | Ca_Kabuli_Chr05              | 43632281                       | (C/G)       |
| 9179        | CakSNP9179     | <i>Kabuli</i>    | Ca_Kabuli_Chr05              | 43632349                       | (T/A)       |
| 9180        | CakSNP9180     | <i>Kabuli</i>    | Ca_Kabuli_Chr05              | 43632400                       | (A/G)       |
| 9181        | CakSNP9181     | <i>Kabuli</i>    | Ca_Kabuli_Chr05              | 43632377                       | (C/T)       |
| 9182        | CakSNP9182     | <i>Kabuli</i>    | Ca_Kabuli_Chr05              | 43632481                       | (G/T)       |
| 9183        | CakSNP9183     | <i>Kabuli</i>    | Ca_Kabuli_Chr05              | 43632508                       | (A/G)       |
| 9184        | CakSNP9184     | <i>Kabuli</i>    | Ca_Kabuli_Chr05              | 43710359                       | (T/G)       |
| 9185        | CakSNP9185     | <i>Kabuli</i>    | Ca_Kabuli_Chr05              | 43710362                       | (A/T)       |
| 9186        | CakSNP9186     | <i>Kabuli</i>    | Ca_Kabuli_Chr05              | 43710366                       | (G/T)       |
| 9187        | CakSNP9187     | <i>Kabuli</i>    | Ca_Kabuli_Chr05              | 43710391                       | (A/G)       |
| 9188        | CakSNP9188     | <i>Kabuli</i>    | Ca_Kabuli_Chr05              | 43742448                       | (C/T)       |
| 9189        | CakSNP9189     | <i>Kabuli</i>    | Ca_Kabuli_Chr05              | 43742456                       | (G/A)       |
| 9190        | CakSNP9190     | <i>Kabuli</i>    | Ca_Kabuli_Chr05              | 43755074                       | (A/G)       |
| 9191        | CakSNP9191     | <i>Kabuli</i>    | Ca_Kabuli_Chr05              | 43755756                       | (A/G)       |
| 9192        | CakSNP9192     | <i>Kabuli</i>    | Ca_Kabuli_Chr05              | 43759059                       | (A/C)       |
| 9193        | CakSNP9193     | <i>Kabuli</i>    | Ca_Kabuli_Chr05              | 43786883                       | (A/G)       |
| 9194        | CakSNP9194     | <i>Kabuli</i>    | Ca_Kabuli_Chr05              | 43789875                       | (C/G)       |
| 9195        | CakSNP9195     | <i>Kabuli</i>    | Ca_Kabuli_Chr05              | 43790108                       | (G/A)       |

| <b>S.N.</b> | <b>SNP IDs</b> | <b>Cultivars</b> | <b>Chromosomes/scaffolds</b> | <b>Physical positions (bp)</b> | <b>SNPs</b> |
|-------------|----------------|------------------|------------------------------|--------------------------------|-------------|
| 9196        | CakSNP9196     | <i>Kabuli</i>    | Ca_Kabuli_Chr05              | 43812119                       | (G/A)       |
| 9197        | CakSNP9197     | <i>Kabuli</i>    | Ca_Kabuli_Chr05              | 43812213                       | (C/T)       |
| 9198        | CakSNP9198     | <i>Kabuli</i>    | Ca_Kabuli_Chr05              | 43859301                       | (G/A)       |
| 9199        | CakSNP9199     | <i>Kabuli</i>    | Ca_Kabuli_Chr05              | 43904489                       | (T/A)       |
| 9200        | CakSNP9200     | <i>Kabuli</i>    | Ca_Kabuli_Chr05              | 43919009                       | (C/T)       |
| 9201        | CakSNP9201     | <i>Kabuli</i>    | Ca_Kabuli_Chr05              | 43919017                       | (T/G)       |
| 9202        | CakSNP9202     | <i>Kabuli</i>    | Ca_Kabuli_Chr05              | 43919022                       | (G/C)       |
| 9203        | CakSNP9203     | <i>Kabuli</i>    | Ca_Kabuli_Chr05              | 43919028                       | (A/G)       |
| 9204        | CakSNP9204     | <i>Kabuli</i>    | Ca_Kabuli_Chr05              | 43982994                       | (C/T)       |
| 9205        | CakSNP9205     | <i>Kabuli</i>    | Ca_Kabuli_Chr05              | 43995843                       | (T/C)       |
| 9206        | CakSNP9206     | <i>Kabuli</i>    | Ca_Kabuli_Chr05              | 44002824                       | (T/G)       |
| 9207        | CakSNP9207     | <i>Kabuli</i>    | Ca_Kabuli_Chr05              | 44002862                       | (C/A)       |
| 9208        | CakSNP9208     | <i>Kabuli</i>    | Ca_Kabuli_Chr05              | 44038229                       | (T/C)       |
| 9209        | CakSNP9209     | <i>Kabuli</i>    | Ca_Kabuli_Chr05              | 44064495                       | (G/A)       |
| 9210        | CakSNP9210     | <i>Kabuli</i>    | Ca_Kabuli_Chr05              | 44080450                       | (G/C)       |
| 9211        | CakSNP9211     | <i>Kabuli</i>    | Ca_Kabuli_Chr05              | 44109260                       | (G/T)       |
| 9212        | CakSNP9212     | <i>Kabuli</i>    | Ca_Kabuli_Chr05              | 44154671                       | (A/G)       |
| 9213        | CakSNP9213     | <i>Kabuli</i>    | Ca_Kabuli_Chr05              | 44159237                       | (C/G)       |
| 9214        | CakSNP9214     | <i>Kabuli</i>    | Ca_Kabuli_Chr05              | 44289612                       | (T/C)       |
| 9215        | CakSNP9215     | <i>Kabuli</i>    | Ca_Kabuli_Chr05              | 44334286                       | (C/G)       |
| 9216        | CakSNP9216     | <i>Kabuli</i>    | Ca_Kabuli_Chr05              | 44334318                       | (C/T)       |
| 9217        | CakSNP9217     | <i>Kabuli</i>    | Ca_Kabuli_Chr05              | 44364134                       | (C/T)       |
| 9218        | CakSNP9218     | <i>Kabuli</i>    | Ca_Kabuli_Chr05              | 44373968                       | (G/T)       |
| 9219        | CakSNP9219     | <i>Kabuli</i>    | Ca_Kabuli_Chr05              | 44378178                       | (C/A)       |
| 9220        | CakSNP9220     | <i>Kabuli</i>    | Ca_Kabuli_Chr05              | 44428965                       | (G/A)       |
| 9221        | CakSNP9221     | <i>Kabuli</i>    | Ca_Kabuli_Chr05              | 44461250                       | (A/G)       |
| 9222        | CakSNP9222     | <i>Kabuli</i>    | Ca_Kabuli_Chr05              | 44491489                       | (G/T)       |
| 9223        | CakSNP9223     | <i>Kabuli</i>    | Ca_Kabuli_Chr05              | 44555718                       | (A/C)       |
| 9224        | CakSNP9224     | <i>Kabuli</i>    | Ca_Kabuli_Chr05              | 44561095                       | (T/C)       |
| 9225        | CakSNP9225     | <i>Kabuli</i>    | Ca_Kabuli_Chr05              | 44656921                       | (G/A)       |
| 9226        | CakSNP9226     | <i>Kabuli</i>    | Ca_Kabuli_Chr05              | 44667285                       | (C/T)       |
| 9227        | CakSNP9227     | <i>Kabuli</i>    | Ca_Kabuli_Chr05              | 44667297                       | (C/T)       |
| 9228        | CakSNP9228     | <i>Kabuli</i>    | Ca_Kabuli_Chr05              | 44667359                       | (C/A)       |
| 9229        | CakSNP9229     | <i>Kabuli</i>    | Ca_Kabuli_Chr05              | 44760403                       | (A/G)       |
| 9230        | CakSNP9230     | <i>Kabuli</i>    | Ca_Kabuli_Chr05              | 44760347                       | (G/T)       |
| 9231        | CakSNP9231     | <i>Kabuli</i>    | Ca_Kabuli_Chr05              | 44760469                       | (C/T)       |
| 9232        | CakSNP9232     | <i>Kabuli</i>    | Ca_Kabuli_Chr05              | 44760490                       | (C/A)       |
| 9233        | CakSNP9233     | <i>Kabuli</i>    | Ca_Kabuli_Chr05              | 44772326                       | (G/A)       |

| <b>S.N.</b> | <b>SNP IDs</b> | <b>Cultivars</b> | <b>Chromosomes/scaffolds</b> | <b>Physical positions (bp)</b> | <b>SNPs</b> |
|-------------|----------------|------------------|------------------------------|--------------------------------|-------------|
| 9234        | CakSNP9234     | <i>Kabuli</i>    | Ca_Kabuli_Chr05              | 44884779                       | (G/C)       |
| 9235        | CakSNP9235     | <i>Kabuli</i>    | Ca_Kabuli_Chr05              | 44887105                       | (T/G)       |
| 9236        | CakSNP9236     | <i>Kabuli</i>    | Ca_Kabuli_Chr05              | 44887241                       | (T/C)       |
| 9237        | CakSNP9237     | <i>Kabuli</i>    | Ca_Kabuli_Chr05              | 44887234                       | (A/C)       |
| 9238        | CakSNP9238     | <i>Kabuli</i>    | Ca_Kabuli_Chr05              | 44891426                       | (G/C)       |
| 9239        | CakSNP9239     | <i>Kabuli</i>    | Ca_Kabuli_Chr05              | 44911842                       | (C/T)       |
| 9240        | CakSNP9240     | <i>Kabuli</i>    | Ca_Kabuli_Chr05              | 44911868                       | (C/G)       |
| 9241        | CakSNP9241     | <i>Kabuli</i>    | Ca_Kabuli_Chr05              | 44911881                       | (G/A)       |
| 9242        | CakSNP9242     | <i>Kabuli</i>    | Ca_Kabuli_Chr05              | 44911906                       | (C/T)       |
| 9243        | CakSNP9243     | <i>Kabuli</i>    | Ca_Kabuli_Chr05              | 44918947                       | (C/A)       |
| 9244        | CakSNP9244     | <i>Kabuli</i>    | Ca_Kabuli_Chr05              | 44938814                       | (A/T)       |
| 9245        | CakSNP9245     | <i>Kabuli</i>    | Ca_Kabuli_Chr05              | 44938832                       | (A/G)       |
| 9246        | CakSNP9246     | <i>Kabuli</i>    | Ca_Kabuli_Chr05              | 44939058                       | (C/G)       |
| 9247        | CakSNP9247     | <i>Kabuli</i>    | Ca_Kabuli_Chr05              | 44939033                       | (G/A)       |
| 9248        | CakSNP9248     | <i>Kabuli</i>    | Ca_Kabuli_Chr05              | 45087170                       | (G/A)       |
| 9249        | CakSNP9249     | <i>Kabuli</i>    | Ca_Kabuli_Chr05              | 45087156                       | (A/G)       |
| 9250        | CakSNP9250     | <i>Kabuli</i>    | Ca_Kabuli_Chr05              | 45087146                       | (C/G)       |
| 9251        | CakSNP9251     | <i>Kabuli</i>    | Ca_Kabuli_Chr05              | 45087140                       | (C/A)       |
| 9252        | CakSNP9252     | <i>Kabuli</i>    | Ca_Kabuli_Chr05              | 45087202                       | (G/C)       |
| 9253        | CakSNP9253     | <i>Kabuli</i>    | Ca_Kabuli_Chr05              | 45087267                       | (A/G)       |
| 9254        | CakSNP9254     | <i>Kabuli</i>    | Ca_Kabuli_Chr05              | 45087228                       | (A/C)       |
| 9255        | CakSNP9255     | <i>Kabuli</i>    | Ca_Kabuli_Chr05              | 45087215                       | (G/A)       |
| 9256        | CakSNP9256     | <i>Kabuli</i>    | Ca_Kabuli_Chr05              | 45215617                       | (G/A)       |
| 9257        | CakSNP9257     | <i>Kabuli</i>    | Ca_Kabuli_Chr05              | 45219125                       | (C/T)       |
| 9258        | CakSNP9258     | <i>Kabuli</i>    | Ca_Kabuli_Chr05              | 45219258                       | (G/T)       |
| 9259        | CakSNP9259     | <i>Kabuli</i>    | Ca_Kabuli_Chr05              | 45219355                       | (T/G)       |
| 9260        | CakSNP9260     | <i>Kabuli</i>    | Ca_Kabuli_Chr05              | 45254102                       | (C/T)       |
| 9261        | CakSNP9261     | <i>Kabuli</i>    | Ca_Kabuli_Chr05              | 45254112                       | (T/G)       |
| 9262        | CakSNP9262     | <i>Kabuli</i>    | Ca_Kabuli_Chr05              | 45301772                       | (T/G)       |
| 9263        | CakSNP9263     | <i>Kabuli</i>    | Ca_Kabuli_Chr05              | 45337274                       | (C/G)       |
| 9264        | CakSNP9264     | <i>Kabuli</i>    | Ca_Kabuli_Chr05              | 45337307                       | (C/T)       |
| 9265        | CakSNP9265     | <i>Kabuli</i>    | Ca_Kabuli_Chr05              | 45406853                       | (C/T)       |
| 9266        | CakSNP9266     | <i>Kabuli</i>    | Ca_Kabuli_Chr05              | 45407063                       | (G/A)       |
| 9267        | CakSNP9267     | <i>Kabuli</i>    | Ca_Kabuli_Chr05              | 45407044                       | (A/C)       |
| 9268        | CakSNP9268     | <i>Kabuli</i>    | Ca_Kabuli_Chr05              | 45414089                       | (C/G)       |
| 9269        | CakSNP9269     | <i>Kabuli</i>    | Ca_Kabuli_Chr05              | 45428229                       | (A/G)       |
| 9270        | CakSNP9270     | <i>Kabuli</i>    | Ca_Kabuli_Chr05              | 45429513                       | (A/G)       |
| 9271        | CakSNP9271     | <i>Kabuli</i>    | Ca_Kabuli_Chr05              | 45429518                       | (T/G)       |

| <b>S.N.</b> | <b>SNP IDs</b> | <b>Cultivars</b> | <b>Chromosomes/scaffolds</b> | <b>Physical positions (bp)</b> | <b>SNPs</b> |
|-------------|----------------|------------------|------------------------------|--------------------------------|-------------|
| 9272        | CakSNP9272     | <i>Kabuli</i>    | Ca_Kabuli_Chr05              | 45441223                       | (C/T)       |
| 9273        | CakSNP9273     | <i>Kabuli</i>    | Ca_Kabuli_Chr05              | 45444675                       | (G/T)       |
| 9274        | CakSNP9274     | <i>Kabuli</i>    | Ca_Kabuli_Chr05              | 45444924                       | (G/T)       |
| 9275        | CakSNP9275     | <i>Kabuli</i>    | Ca_Kabuli_Chr05              | 45480175                       | (T/G)       |
| 9276        | CakSNP9276     | <i>Kabuli</i>    | Ca_Kabuli_Chr05              | 45501379                       | (C/T)       |
| 9277        | CakSNP9277     | <i>Kabuli</i>    | Ca_Kabuli_Chr05              | 45540473                       | (G/A)       |
| 9278        | CakSNP9278     | <i>Kabuli</i>    | Ca_Kabuli_Chr05              | 45559874                       | (C/A)       |
| 9279        | CakSNP9279     | <i>Kabuli</i>    | Ca_Kabuli_Chr05              | 45601196                       | (A/G)       |
| 9280        | CakSNP9280     | <i>Kabuli</i>    | Ca_Kabuli_Chr05              | 45601313                       | (G/A)       |
| 9281        | CakSNP9281     | <i>Kabuli</i>    | Ca_Kabuli_Chr05              | 45642344                       | (C/A)       |
| 9282        | CakSNP9282     | <i>Kabuli</i>    | Ca_Kabuli_Chr05              | 45646235                       | (A/G)       |
| 9283        | CakSNP9283     | <i>Kabuli</i>    | Ca_Kabuli_Chr05              | 45649180                       | (G/A)       |
| 9284        | CakSNP9284     | <i>Kabuli</i>    | Ca_Kabuli_Chr05              | 45649189                       | (G/A)       |
| 9285        | CakSNP9285     | <i>Kabuli</i>    | Ca_Kabuli_Chr05              | 45661109                       | (T/C)       |
| 9286        | CakSNP9286     | <i>Kabuli</i>    | Ca_Kabuli_Chr05              | 45694453                       | (T/G)       |
| 9287        | CakSNP9287     | <i>Kabuli</i>    | Ca_Kabuli_Chr05              | 45710509                       | (G/A)       |
| 9288        | CakSNP9288     | <i>Kabuli</i>    | Ca_Kabuli_Chr05              | 45710476                       | (A/G)       |
| 9289        | CakSNP9289     | <i>Kabuli</i>    | Ca_Kabuli_Chr05              | 45726539                       | (T/A)       |
| 9290        | CakSNP9290     | <i>Kabuli</i>    | Ca_Kabuli_Chr05              | 45726995                       | (C/T)       |
| 9291        | CakSNP9291     | <i>Kabuli</i>    | Ca_Kabuli_Chr05              | 45727022                       | (T/C)       |
| 9292        | CakSNP9292     | <i>Kabuli</i>    | Ca_Kabuli_Chr05              | 45750121                       | (A/T)       |
| 9293        | CakSNP9293     | <i>Kabuli</i>    | Ca_Kabuli_Chr05              | 45798850                       | (C/A)       |
| 9294        | CakSNP9294     | <i>Kabuli</i>    | Ca_Kabuli_Chr05              | 45798966                       | (T/G)       |
| 9295        | CakSNP9295     | <i>Kabuli</i>    | Ca_Kabuli_Chr05              | 45798950                       | (C/T)       |
| 9296        | CakSNP9296     | <i>Kabuli</i>    | Ca_Kabuli_Chr05              | 45798919                       | (C/A)       |
| 9297        | CakSNP9297     | <i>Kabuli</i>    | Ca_Kabuli_Chr05              | 45808905                       | (G/A)       |
| 9298        | CakSNP9298     | <i>Kabuli</i>    | Ca_Kabuli_Chr05              | 45832009                       | (T/G)       |
| 9299        | CakSNP9299     | <i>Kabuli</i>    | Ca_Kabuli_Chr05              | 45832048                       | (C/G)       |
| 9300        | CakSNP9300     | <i>Kabuli</i>    | Ca_Kabuli_Chr05              | 45832070                       | (A/T)       |
| 9301        | CakSNP9301     | <i>Kabuli</i>    | Ca_Kabuli_Chr05              | 45842438                       | (A/C)       |
| 9302        | CakSNP9302     | <i>Kabuli</i>    | Ca_Kabuli_Chr05              | 45845081                       | (A/C)       |
| 9303        | CakSNP9303     | <i>Kabuli</i>    | Ca_Kabuli_Chr05              | 45848030                       | (A/G)       |
| 9304        | CakSNP9304     | <i>Kabuli</i>    | Ca_Kabuli_Chr05              | 45848087                       | (T/G)       |
| 9305        | CakSNP9305     | <i>Kabuli</i>    | Ca_Kabuli_Chr05              | 45952107                       | (A/G)       |
| 9306        | CakSNP9306     | <i>Kabuli</i>    | Ca_Kabuli_Chr05              | 45952842                       | (A/C)       |
| 9307        | CakSNP9307     | <i>Kabuli</i>    | Ca_Kabuli_Chr05              | 45971560                       | (G/A)       |
| 9308        | CakSNP9308     | <i>Kabuli</i>    | Ca_Kabuli_Chr05              | 45978758                       | (A/G)       |
| 9309        | CakSNP9309     | <i>Kabuli</i>    | Ca_Kabuli_Chr05              | 46002514                       | (C/T)       |

| <b>S.N.</b> | <b>SNP IDs</b> | <b>Cultivars</b> | <b>Chromosomes/scaffolds</b> | <b>Physical positions (bp)</b> | <b>SNPs</b> |
|-------------|----------------|------------------|------------------------------|--------------------------------|-------------|
| 9310        | CakSNP9310     | <i>Kabuli</i>    | Ca_Kabuli_Chr05              | 46002497                       | (G/A)       |
| 9311        | CakSNP9311     | <i>Kabuli</i>    | Ca_Kabuli_Chr05              | 46018939                       | (C/T)       |
| 9312        | CakSNP9312     | <i>Kabuli</i>    | Ca_Kabuli_Chr05              | 46019052                       | (T/A)       |
| 9313        | CakSNP9313     | <i>Kabuli</i>    | Ca_Kabuli_Chr05              | 46022566                       | (C/T)       |
| 9314        | CakSNP9314     | <i>Kabuli</i>    | Ca_Kabuli_Chr05              | 46022598                       | (T/C)       |
| 9315        | CakSNP9315     | <i>Kabuli</i>    | Ca_Kabuli_Chr05              | 46022551                       | (G/A)       |
| 9316        | CakSNP9316     | <i>Kabuli</i>    | Ca_Kabuli_Chr05              | 46022549                       | (G/A)       |
| 9317        | CakSNP9317     | <i>Kabuli</i>    | Ca_Kabuli_Chr05              | 46022547                       | (G/A)       |
| 9318        | CakSNP9318     | <i>Kabuli</i>    | Ca_Kabuli_Chr05              | 46022544                       | (A/G)       |
| 9319        | CakSNP9319     | <i>Kabuli</i>    | Ca_Kabuli_Chr05              | 46022531                       | (T/A)       |
| 9320        | CakSNP9320     | <i>Kabuli</i>    | Ca_Kabuli_Chr05              | 46049587                       | (A/G)       |
| 9321        | CakSNP9321     | <i>Kabuli</i>    | Ca_Kabuli_Chr05              | 46050168                       | (A/T)       |
| 9322        | CakSNP9322     | <i>Kabuli</i>    | Ca_Kabuli_Chr05              | 46077190                       | (T/C)       |
| 9323        | CakSNP9323     | <i>Kabuli</i>    | Ca_Kabuli_Chr05              | 46077302                       | (G/A)       |
| 9324        | CakSNP9324     | <i>Kabuli</i>    | Ca_Kabuli_Chr05              | 46083283                       | (G/A)       |
| 9325        | CakSNP9325     | <i>Kabuli</i>    | Ca_Kabuli_Chr05              | 46083343                       | (T/G)       |
| 9326        | CakSNP9326     | <i>Kabuli</i>    | Ca_Kabuli_Chr05              | 46083414                       | (T/G)       |
| 9327        | CakSNP9327     | <i>Kabuli</i>    | Ca_Kabuli_Chr05              | 46119122                       | (G/A)       |
| 9328        | CakSNP9328     | <i>Kabuli</i>    | Ca_Kabuli_Chr05              | 46119182                       | (A/G)       |
| 9329        | CakSNP9329     | <i>Kabuli</i>    | Ca_Kabuli_Chr05              | 46130289                       | (A/C)       |
| 9330        | CakSNP9330     | <i>Kabuli</i>    | Ca_Kabuli_Chr05              | 46155262                       | (C/T)       |
| 9331        | CakSNP9331     | <i>Kabuli</i>    | Ca_Kabuli_Chr05              | 46176366                       | (T/C)       |
| 9332        | CakSNP9332     | <i>Kabuli</i>    | Ca_Kabuli_Chr05              | 46176443                       | (G/A)       |
| 9333        | CakSNP9333     | <i>Kabuli</i>    | Ca_Kabuli_Chr05              | 46214229                       | (G/T)       |
| 9334        | CakSNP9334     | <i>Kabuli</i>    | Ca_Kabuli_Chr05              | 46214233                       | (C/T)       |
| 9335        | CakSNP9335     | <i>Kabuli</i>    | Ca_Kabuli_Chr05              | 46230010                       | (G/C)       |
| 9336        | CakSNP9336     | <i>Kabuli</i>    | Ca_Kabuli_Chr05              | 46230011                       | (G/A)       |
| 9337        | CakSNP9337     | <i>Kabuli</i>    | Ca_Kabuli_Chr05              | 46230109                       | (T/G)       |
| 9338        | CakSNP9338     | <i>Kabuli</i>    | Ca_Kabuli_Chr05              | 46246419                       | (G/C)       |
| 9339        | CakSNP9339     | <i>Kabuli</i>    | Ca_Kabuli_Chr05              | 46252617                       | (C/T)       |
| 9340        | CakSNP9340     | <i>Kabuli</i>    | Ca_Kabuli_Chr05              | 46252643                       | (T/A)       |
| 9341        | CakSNP9341     | <i>Kabuli</i>    | Ca_Kabuli_Chr05              | 46252605                       | (C/A)       |
| 9342        | CakSNP9342     | <i>Kabuli</i>    | Ca_Kabuli_Chr05              | 46260822                       | (C/T)       |
| 9343        | CakSNP9343     | <i>Kabuli</i>    | Ca_Kabuli_Chr05              | 46294000                       | (G/A)       |
| 9344        | CakSNP9344     | <i>Kabuli</i>    | Ca_Kabuli_Chr05              | 46300789                       | (G/A)       |
| 9345        | CakSNP9345     | <i>Kabuli</i>    | Ca_Kabuli_Chr05              | 46301639                       | (A/G)       |
| 9346        | CakSNP9346     | <i>Kabuli</i>    | Ca_Kabuli_Chr05              | 46321992                       | (C/T)       |
| 9347        | CakSNP9347     | <i>Kabuli</i>    | Ca_Kabuli_Chr05              | 46328589                       | (C/A)       |



| <b>S.N.</b> | <b>SNP IDs</b> | <b>Cultivars</b> | <b>Chromosomes/scaffolds</b> | <b>Physical positions (bp)</b> | <b>SNPs</b> |
|-------------|----------------|------------------|------------------------------|--------------------------------|-------------|
| 9348        | CakSNP9348     | <i>Kabuli</i>    | Ca_Kabuli_Chr05              | 46328627                       | (A/G)       |
| 9349        | CakSNP9349     | <i>Kabuli</i>    | Ca_Kabuli_Chr05              | 46328895                       | (T/C)       |
| 9350        | CakSNP9350     | <i>Kabuli</i>    | Ca_Kabuli_Chr05              | 46328902                       | (C/T)       |
| 9351        | CakSNP9351     | <i>Kabuli</i>    | Ca_Kabuli_Chr05              | 46344109                       | (G/T)       |
| 9352        | CakSNP9352     | <i>Kabuli</i>    | Ca_Kabuli_Chr05              | 46344121                       | (G/A)       |
| 9353        | CakSNP9353     | <i>Kabuli</i>    | Ca_Kabuli_Chr05              | 46356764                       | (G/A)       |
| 9354        | CakSNP9354     | <i>Kabuli</i>    | Ca_Kabuli_Chr05              | 46366598                       | (G/T)       |
| 9355        | CakSNP9355     | <i>Kabuli</i>    | Ca_Kabuli_Chr05              | 46368606                       | (G/T)       |
| 9356        | CakSNP9356     | <i>Kabuli</i>    | Ca_Kabuli_Chr05              | 46376496                       | (G/T)       |
| 9357        | CakSNP9357     | <i>Kabuli</i>    | Ca_Kabuli_Chr05              | 46376532                       | (A/C)       |
| 9358        | CakSNP9358     | <i>Kabuli</i>    | Ca_Kabuli_Chr05              | 46403922                       | (G/T)       |
| 9359        | CakSNP9359     | <i>Kabuli</i>    | Ca_Kabuli_Chr05              | 46422788                       | (C/G)       |
| 9360        | CakSNP9360     | <i>Kabuli</i>    | Ca_Kabuli_Chr05              | 46422869                       | (A/T)       |
| 9361        | CakSNP9361     | <i>Kabuli</i>    | Ca_Kabuli_Chr05              | 46445611                       | (A/T)       |
| 9362        | CakSNP9362     | <i>Kabuli</i>    | Ca_Kabuli_Chr05              | 46445651                       | (G/T)       |
| 9363        | CakSNP9363     | <i>Kabuli</i>    | Ca_Kabuli_Chr05              | 46491761                       | (C/G)       |
| 9364        | CakSNP9364     | <i>Kabuli</i>    | Ca_Kabuli_Chr05              | 46526963                       | (A/C)       |
| 9365        | CakSNP9365     | <i>Kabuli</i>    | Ca_Kabuli_Chr05              | 46621351                       | (G/A)       |
| 9366        | CakSNP9366     | <i>Kabuli</i>    | Ca_Kabuli_Chr05              | 46621455                       | (C/T)       |
| 9367        | CakSNP9367     | <i>Kabuli</i>    | Ca_Kabuli_Chr05              | 46668462                       | (T/C)       |
| 9368        | CakSNP9368     | <i>Kabuli</i>    | Ca_Kabuli_Chr05              | 46792131                       | (C/T)       |
| 9369        | CakSNP9369     | <i>Kabuli</i>    | Ca_Kabuli_Chr05              | 46945916                       | (G/A)       |
| 9370        | CakSNP9370     | <i>Kabuli</i>    | Ca_Kabuli_Chr05              | 46956474                       | (T/C)       |
| 9371        | CakSNP9371     | <i>Kabuli</i>    | Ca_Kabuli_Chr05              | 47061531                       | (C/T)       |
| 9372        | CakSNP9372     | <i>Kabuli</i>    | Ca_Kabuli_Chr05              | 47073011                       | (A/T)       |
| 9373        | CakSNP9373     | <i>Kabuli</i>    | Ca_Kabuli_Chr05              | 47073016                       | (G/C)       |
| 9374        | CakSNP9374     | <i>Kabuli</i>    | Ca_Kabuli_Chr05              | 47091499                       | (C/T)       |
| 9375        | CakSNP9375     | <i>Kabuli</i>    | Ca_Kabuli_Chr05              | 47151660                       | (C/G)       |
| 9376        | CakSNP9376     | <i>Kabuli</i>    | Ca_Kabuli_Chr05              | 47151840                       | (T/G)       |
| 9377        | CakSNP9377     | <i>Kabuli</i>    | Ca_Kabuli_Chr05              | 47165299                       | (A/C)       |
| 9378        | CakSNP9378     | <i>Kabuli</i>    | Ca_Kabuli_Chr05              | 47256002                       | (G/T)       |
| 9379        | CakSNP9379     | <i>Kabuli</i>    | Ca_Kabuli_Chr05              | 47256038                       | (A/T)       |
| 9380        | CakSNP9380     | <i>Kabuli</i>    | Ca_Kabuli_Chr05              | 47289004                       | (A/C)       |
| 9381        | CakSNP9381     | <i>Kabuli</i>    | Ca_Kabuli_Chr05              | 47298345                       | (A/G)       |
| 9382        | CakSNP9382     | <i>Kabuli</i>    | Ca_Kabuli_Chr05              | 47329979                       | (T/G)       |
| 9383        | CakSNP9383     | <i>Kabuli</i>    | Ca_Kabuli_Chr05              | 47362666                       | (T/G)       |
| 9384        | CakSNP9384     | <i>Kabuli</i>    | Ca_Kabuli_Chr05              | 47362814                       | (C/T)       |
| 9385        | CakSNP9385     | <i>Kabuli</i>    | Ca_Kabuli_Chr05              | 47375789                       | (C/T)       |

| <b>S.N.</b> | <b>SNP IDs</b> | <b>Cultivars</b> | <b>Chromosomes/scaffolds</b> | <b>Physical positions (bp)</b> | <b>SNPs</b> |
|-------------|----------------|------------------|------------------------------|--------------------------------|-------------|
| 9386        | CakSNP9386     | <i>Kabuli</i>    | Ca_Kabuli_Chr05              | 47422536                       | (G/A)       |
| 9387        | CakSNP9387     | <i>Kabuli</i>    | Ca_Kabuli_Chr05              | 47518533                       | (G/A)       |
| 9388        | CakSNP9388     | <i>Kabuli</i>    | Ca_Kabuli_Chr05              | 47539345                       | (T/C)       |
| 9389        | CakSNP9389     | <i>Kabuli</i>    | Ca_Kabuli_Chr05              | 47539505                       | (G/T)       |
| 9390        | CakSNP9390     | <i>Kabuli</i>    | Ca_Kabuli_Chr05              | 47570939                       | (T/C)       |
| 9391        | CakSNP9391     | <i>Kabuli</i>    | Ca_Kabuli_Chr05              | 47591327                       | (G/T)       |
| 9392        | CakSNP9392     | <i>Kabuli</i>    | Ca_Kabuli_Chr05              | 47594471                       | (T/C)       |
| 9393        | CakSNP9393     | <i>Kabuli</i>    | Ca_Kabuli_Chr05              | 47641224                       | (A/C)       |
| 9394        | CakSNP9394     | <i>Kabuli</i>    | Ca_Kabuli_Chr05              | 47641472                       | (T/C)       |
| 9395        | CakSNP9395     | <i>Kabuli</i>    | Ca_Kabuli_Chr05              | 47641628                       | (T/C)       |
| 9396        | CakSNP9396     | <i>Kabuli</i>    | Ca_Kabuli_Chr05              | 47641567                       | (A/G)       |
| 9397        | CakSNP9397     | <i>Kabuli</i>    | Ca_Kabuli_Chr05              | 47643992                       | (G/T)       |
| 9398        | CakSNP9398     | <i>Kabuli</i>    | Ca_Kabuli_Chr05              | 47669124                       | (A/G)       |
| 9399        | CakSNP9399     | <i>Kabuli</i>    | Ca_Kabuli_Chr05              | 47670649                       | (G/A)       |
| 9400        | CakSNP9400     | <i>Kabuli</i>    | Ca_Kabuli_Chr05              | 47706780                       | (G/A)       |
| 9401        | CakSNP9401     | <i>Kabuli</i>    | Ca_Kabuli_Chr05              | 47718830                       | (A/G)       |
| 9402        | CakSNP9402     | <i>Kabuli</i>    | Ca_Kabuli_Chr05              | 47718839                       | (A/G)       |
| 9403        | CakSNP9403     | <i>Kabuli</i>    | Ca_Kabuli_Chr05              | 47733645                       | (A/G)       |
| 9404        | CakSNP9404     | <i>Kabuli</i>    | Ca_Kabuli_Chr05              | 47759169                       | (T/G)       |
| 9405        | CakSNP9405     | <i>Kabuli</i>    | Ca_Kabuli_Chr05              | 47759745                       | (G/A)       |
| 9406        | CakSNP9406     | <i>Kabuli</i>    | Ca_Kabuli_Chr05              | 47761348                       | (A/G)       |
| 9407        | CakSNP9407     | <i>Kabuli</i>    | Ca_Kabuli_Chr05              | 47761322                       | (C/A)       |
| 9408        | CakSNP9408     | <i>Kabuli</i>    | Ca_Kabuli_Chr05              | 47770909                       | (T/G)       |
| 9409        | CakSNP9409     | <i>Kabuli</i>    | Ca_Kabuli_Chr05              | 47774516                       | (A/G)       |
| 9410        | CakSNP9410     | <i>Kabuli</i>    | Ca_Kabuli_Chr05              | 47774559                       | (C/T)       |
| 9411        | CakSNP9411     | <i>Kabuli</i>    | Ca_Kabuli_Chr05              | 47774718                       | (C/G)       |
| 9412        | CakSNP9412     | <i>Kabuli</i>    | Ca_Kabuli_Chr05              | 47775175                       | (C/T)       |
| 9413        | CakSNP9413     | <i>Kabuli</i>    | Ca_Kabuli_Chr05              | 47782605                       | (G/A)       |
| 9414        | CakSNP9414     | <i>Kabuli</i>    | Ca_Kabuli_Chr05              | 47782606                       | (C/T)       |
| 9415        | CakSNP9415     | <i>Kabuli</i>    | Ca_Kabuli_Chr05              | 47782697                       | (T/C)       |
| 9416        | CakSNP9416     | <i>Kabuli</i>    | Ca_Kabuli_Chr05              | 47782843                       | (T/C)       |
| 9417        | CakSNP9417     | <i>Kabuli</i>    | Ca_Kabuli_Chr05              | 47803636                       | (C/A)       |
| 9418        | CakSNP9418     | <i>Kabuli</i>    | Ca_Kabuli_Chr05              | 47812041                       | (C/T)       |
| 9419        | CakSNP9419     | <i>Kabuli</i>    | Ca_Kabuli_Chr05              | 47813712                       | (T/C)       |
| 9420        | CakSNP9420     | <i>Kabuli</i>    | Ca_Kabuli_Chr05              | 47813767                       | (A/G)       |
| 9421        | CakSNP9421     | <i>Kabuli</i>    | Ca_Kabuli_Chr05              | 47829261                       | (T/C)       |
| 9422        | CakSNP9422     | <i>Kabuli</i>    | Ca_Kabuli_Chr05              | 47829331                       | (T/A)       |
| 9423        | CakSNP9423     | <i>Kabuli</i>    | Ca_Kabuli_Chr05              | 47871094                       | (C/T)       |

| <b>S.N.</b> | <b>SNP IDs</b> | <b>Cultivars</b> | <b>Chromosomes/scaffolds</b> | <b>Physical positions (bp)</b> | <b>SNPs</b> |
|-------------|----------------|------------------|------------------------------|--------------------------------|-------------|
| 9424        | CakSNP9424     | <i>Kabuli</i>    | Ca_Kabuli_Chr05              | 47871137                       | (G/A)       |
| 9425        | CakSNP9425     | <i>Kabuli</i>    | Ca_Kabuli_Chr05              | 47871248                       | (G/T)       |
| 9426        | CakSNP9426     | <i>Kabuli</i>    | Ca_Kabuli_Chr05              | 47871234                       | (A/G)       |
| 9427        | CakSNP9427     | <i>Kabuli</i>    | Ca_Kabuli_Chr05              | 47871194                       | (T/C)       |
| 9428        | CakSNP9428     | <i>Kabuli</i>    | Ca_Kabuli_Chr05              | 47878997                       | (C/T)       |
| 9429        | CakSNP9429     | <i>Kabuli</i>    | Ca_Kabuli_Chr05              | 47901017                       | (G/T)       |
| 9430        | CakSNP9430     | <i>Kabuli</i>    | Ca_Kabuli_Chr05              | 47931566                       | (T/C)       |
| 9431        | CakSNP9431     | <i>Kabuli</i>    | Ca_Kabuli_Chr05              | 47941783                       | (C/T)       |
| 9432        | CakSNP9432     | <i>Kabuli</i>    | Ca_Kabuli_Chr05              | 47943743                       | (G/A)       |
| 9433        | CakSNP9433     | <i>Kabuli</i>    | Ca_Kabuli_Chr05              | 47965279                       | (G/A)       |
| 9434        | CakSNP9434     | <i>Kabuli</i>    | Ca_Kabuli_Chr05              | 47994780                       | (A/C)       |
| 9435        | CakSNP9435     | <i>Kabuli</i>    | Ca_Kabuli_Chr05              | 47997751                       | (A/T)       |
| 9436        | CakSNP9436     | <i>Kabuli</i>    | Ca_Kabuli_Chr05              | 48005123                       | (A/C)       |
| 9437        | CakSNP9437     | <i>Kabuli</i>    | Ca_Kabuli_Chr05              | 48005073                       | (G/A)       |
| 9438        | CakSNP9438     | <i>Kabuli</i>    | Ca_Kabuli_Chr05              | 48042132                       | (A/C)       |
| 9439        | CakSNP9439     | <i>Kabuli</i>    | Ca_Kabuli_Chr05              | 48063028                       | (A/T)       |
| 9440        | CakSNP9440     | <i>Kabuli</i>    | Ca_Kabuli_Chr05              | 48069744                       | (G/A)       |
| 9441        | CakSNP9441     | <i>Kabuli</i>    | Ca_Kabuli_Chr05              | 48069811                       | (G/C)       |
| 9442        | CakSNP9442     | <i>Kabuli</i>    | Ca_Kabuli_Chr05              | 48069859                       | (A/T)       |
| 9443        | CakSNP9443     | <i>Kabuli</i>    | Ca_Kabuli_Chr05              | 48069844                       | (T/C)       |
| 9444        | CakSNP9444     | <i>Kabuli</i>    | Ca_Kabuli_Chr05              | 48069833                       | (G/A)       |
| 9445        | CakSNP9445     | <i>Kabuli</i>    | Ca_Kabuli_Chr06              | 1916                           | (T/C)       |
| 9446        | CakSNP9446     | <i>Kabuli</i>    | Ca_Kabuli_Chr06              | 1847                           | (G/T)       |
| 9447        | CakSNP9447     | <i>Kabuli</i>    | Ca_Kabuli_Chr06              | 140189                         | (A/G)       |
| 9448        | CakSNP9448     | <i>Kabuli</i>    | Ca_Kabuli_Chr06              | 140279                         | (T/C)       |
| 9449        | CakSNP9449     | <i>Kabuli</i>    | Ca_Kabuli_Chr06              | 140320                         | (G/A)       |
| 9450        | CakSNP9450     | <i>Kabuli</i>    | Ca_Kabuli_Chr06              | 152513                         | (C/T)       |
| 9451        | CakSNP9451     | <i>Kabuli</i>    | Ca_Kabuli_Chr06              | 152556                         | (T/C)       |
| 9452        | CakSNP9452     | <i>Kabuli</i>    | Ca_Kabuli_Chr06              | 166823                         | (G/A)       |
| 9453        | CakSNP9453     | <i>Kabuli</i>    | Ca_Kabuli_Chr06              | 166806                         | (C/T)       |
| 9454        | CakSNP9454     | <i>Kabuli</i>    | Ca_Kabuli_Chr06              | 166959                         | (G/A)       |
| 9455        | CakSNP9455     | <i>Kabuli</i>    | Ca_Kabuli_Chr06              | 166943                         | (G/A)       |
| 9456        | CakSNP9456     | <i>Kabuli</i>    | Ca_Kabuli_Chr06              | 166938                         | (G/T)       |
| 9457        | CakSNP9457     | <i>Kabuli</i>    | Ca_Kabuli_Chr06              | 166934                         | (G/A)       |
| 9458        | CakSNP9458     | <i>Kabuli</i>    | Ca_Kabuli_Chr06              | 166932                         | (G/A)       |
| 9459        | CakSNP9459     | <i>Kabuli</i>    | Ca_Kabuli_Chr06              | 166911                         | (A/G)       |
| 9460        | CakSNP9460     | <i>Kabuli</i>    | Ca_Kabuli_Chr06              | 204368                         | (G/A)       |
| 9461        | CakSNP9461     | <i>Kabuli</i>    | Ca_Kabuli_Chr06              | 204412                         | (G/C)       |

| <b>S.N.</b> | <b>SNP IDs</b> | <b>Cultivars</b> | <b>Chromosomes/scaffolds</b> | <b>Physical positions (bp)</b> | <b>SNPs</b> |
|-------------|----------------|------------------|------------------------------|--------------------------------|-------------|
| 9462        | CakSNP9462     | <i>Kabuli</i>    | Ca_Kabuli_Chr06              | 204438                         | (T/C)       |
| 9463        | CakSNP9463     | <i>Kabuli</i>    | Ca_Kabuli_Chr06              | 267151                         | (A/G)       |
| 9464        | CakSNP9464     | <i>Kabuli</i>    | Ca_Kabuli_Chr06              | 269269                         | (T/G)       |
| 9465        | CakSNP9465     | <i>Kabuli</i>    | Ca_Kabuli_Chr06              | 324301                         | (C/T)       |
| 9466        | CakSNP9466     | <i>Kabuli</i>    | Ca_Kabuli_Chr06              | 348283                         | (C/T)       |
| 9467        | CakSNP9467     | <i>Kabuli</i>    | Ca_Kabuli_Chr06              | 348295                         | (G/C)       |
| 9468        | CakSNP9468     | <i>Kabuli</i>    | Ca_Kabuli_Chr06              | 375684                         | (T/G)       |
| 9469        | CakSNP9469     | <i>Kabuli</i>    | Ca_Kabuli_Chr06              | 386250                         | (A/G)       |
| 9470        | CakSNP9470     | <i>Kabuli</i>    | Ca_Kabuli_Chr06              | 474489                         | (C/A)       |
| 9471        | CakSNP9471     | <i>Kabuli</i>    | Ca_Kabuli_Chr06              | 505875                         | (T/C)       |
| 9472        | CakSNP9472     | <i>Kabuli</i>    | Ca_Kabuli_Chr06              | 515221                         | (T/G)       |
| 9473        | CakSNP9473     | <i>Kabuli</i>    | Ca_Kabuli_Chr06              | 548416                         | (A/T)       |
| 9474        | CakSNP9474     | <i>Kabuli</i>    | Ca_Kabuli_Chr06              | 551130                         | (T/G)       |
| 9475        | CakSNP9475     | <i>Kabuli</i>    | Ca_Kabuli_Chr06              | 561562                         | (A/G)       |
| 9476        | CakSNP9476     | <i>Kabuli</i>    | Ca_Kabuli_Chr06              | 580616                         | (G/C)       |
| 9477        | CakSNP9477     | <i>Kabuli</i>    | Ca_Kabuli_Chr06              | 588592                         | (C/A)       |
| 9478        | CakSNP9478     | <i>Kabuli</i>    | Ca_Kabuli_Chr06              | 638983                         | (T/A)       |
| 9479        | CakSNP9479     | <i>Kabuli</i>    | Ca_Kabuli_Chr06              | 645755                         | (G/T)       |
| 9480        | CakSNP9480     | <i>Kabuli</i>    | Ca_Kabuli_Chr06              | 645746                         | (G/T)       |
| 9481        | CakSNP9481     | <i>Kabuli</i>    | Ca_Kabuli_Chr06              | 647322                         | (A/C)       |
| 9482        | CakSNP9482     | <i>Kabuli</i>    | Ca_Kabuli_Chr06              | 697187                         | (A/G)       |
| 9483        | CakSNP9483     | <i>Kabuli</i>    | Ca_Kabuli_Chr06              | 697169                         | (A/G)       |
| 9484        | CakSNP9484     | <i>Kabuli</i>    | Ca_Kabuli_Chr06              | 697168                         | (C/T)       |
| 9485        | CakSNP9485     | <i>Kabuli</i>    | Ca_Kabuli_Chr06              | 697162                         | (A/G)       |
| 9486        | CakSNP9486     | <i>Kabuli</i>    | Ca_Kabuli_Chr06              | 697158                         | (G/A)       |
| 9487        | CakSNP9487     | <i>Kabuli</i>    | Ca_Kabuli_Chr06              | 697148                         | (C/T)       |
| 9488        | CakSNP9488     | <i>Kabuli</i>    | Ca_Kabuli_Chr06              | 697147                         | (A/G)       |
| 9489        | CakSNP9489     | <i>Kabuli</i>    | Ca_Kabuli_Chr06              | 697142                         | (G/C)       |
| 9490        | CakSNP9490     | <i>Kabuli</i>    | Ca_Kabuli_Chr06              | 894921                         | (A/G)       |
| 9491        | CakSNP9491     | <i>Kabuli</i>    | Ca_Kabuli_Chr06              | 902403                         | (G/A)       |
| 9492        | CakSNP9492     | <i>Kabuli</i>    | Ca_Kabuli_Chr06              | 902402                         | (T/C)       |
| 9493        | CakSNP9493     | <i>Kabuli</i>    | Ca_Kabuli_Chr06              | 949263                         | (C/A)       |
| 9494        | CakSNP9494     | <i>Kabuli</i>    | Ca_Kabuli_Chr06              | 961652                         | (C/T)       |
| 9495        | CakSNP9495     | <i>Kabuli</i>    | Ca_Kabuli_Chr06              | 961805                         | (C/T)       |
| 9496        | CakSNP9496     | <i>Kabuli</i>    | Ca_Kabuli_Chr06              | 961733                         | (T/A)       |
| 9497        | CakSNP9497     | <i>Kabuli</i>    | Ca_Kabuli_Chr06              | 997997                         | (T/A)       |
| 9498        | CakSNP9498     | <i>Kabuli</i>    | Ca_Kabuli_Chr06              | 1130293                        | (C/T)       |
| 9499        | CakSNP9499     | <i>Kabuli</i>    | Ca_Kabuli_Chr06              | 1212889                        | (G/A)       |

| <b>S.N.</b> | <b>SNP IDs</b> | <b>Cultivars</b> | <b>Chromosomes/scaffolds</b> | <b>Physical positions (bp)</b> | <b>SNPs</b> |
|-------------|----------------|------------------|------------------------------|--------------------------------|-------------|
| 9500        | CakSNP9500     | <i>Kabuli</i>    | Ca_Kabuli_Chr06              | 1220425                        | (C/T)       |
| 9501        | CakSNP9501     | <i>Kabuli</i>    | Ca_Kabuli_Chr06              | 1220460                        | (G/C)       |
| 9502        | CakSNP9502     | <i>Kabuli</i>    | Ca_Kabuli_Chr06              | 1220465                        | (G/A)       |
| 9503        | CakSNP9503     | <i>Kabuli</i>    | Ca_Kabuli_Chr06              | 1220510                        | (A/T)       |
| 9504        | CakSNP9504     | <i>Kabuli</i>    | Ca_Kabuli_Chr06              | 1220499                        | (C/G)       |
| 9505        | CakSNP9505     | <i>Kabuli</i>    | Ca_Kabuli_Chr06              | 1287168                        | (C/T)       |
| 9506        | CakSNP9506     | <i>Kabuli</i>    | Ca_Kabuli_Chr06              | 1290413                        | (C/G)       |
| 9507        | CakSNP9507     | <i>Kabuli</i>    | Ca_Kabuli_Chr06              | 1290538                        | (T/G)       |
| 9508        | CakSNP9508     | <i>Kabuli</i>    | Ca_Kabuli_Chr06              | 1295748                        | (T/C)       |
| 9509        | CakSNP9509     | <i>Kabuli</i>    | Ca_Kabuli_Chr06              | 1312881                        | (T/C)       |
| 9510        | CakSNP9510     | <i>Kabuli</i>    | Ca_Kabuli_Chr06              | 1312932                        | (G/A)       |
| 9511        | CakSNP9511     | <i>Kabuli</i>    | Ca_Kabuli_Chr06              | 1312982                        | (C/A)       |
| 9512        | CakSNP9512     | <i>Kabuli</i>    | Ca_Kabuli_Chr06              | 1315583                        | (G/C)       |
| 9513        | CakSNP9513     | <i>Kabuli</i>    | Ca_Kabuli_Chr06              | 1626723                        | (T/C)       |
| 9514        | CakSNP9514     | <i>Kabuli</i>    | Ca_Kabuli_Chr06              | 1626712                        | (C/T)       |
| 9515        | CakSNP9515     | <i>Kabuli</i>    | Ca_Kabuli_Chr06              | 1817599                        | (C/T)       |
| 9516        | CakSNP9516     | <i>Kabuli</i>    | Ca_Kabuli_Chr06              | 1817602                        | (A/T)       |
| 9517        | CakSNP9517     | <i>Kabuli</i>    | Ca_Kabuli_Chr06              | 1817607                        | (T/C)       |
| 9518        | CakSNP9518     | <i>Kabuli</i>    | Ca_Kabuli_Chr06              | 1817628                        | (A/T)       |
| 9519        | CakSNP9519     | <i>Kabuli</i>    | Ca_Kabuli_Chr06              | 1932114                        | (C/G)       |
| 9520        | CakSNP9520     | <i>Kabuli</i>    | Ca_Kabuli_Chr06              | 1932175                        | (G/A)       |
| 9521        | CakSNP9521     | <i>Kabuli</i>    | Ca_Kabuli_Chr06              | 1966137                        | (T/C)       |
| 9522        | CakSNP9522     | <i>Kabuli</i>    | Ca_Kabuli_Chr06              | 1978781                        | (C/A)       |
| 9523        | CakSNP9523     | <i>Kabuli</i>    | Ca_Kabuli_Chr06              | 1978864                        | (A/C)       |
| 9524        | CakSNP9524     | <i>Kabuli</i>    | Ca_Kabuli_Chr06              | 1978867                        | (T/A)       |
| 9525        | CakSNP9525     | <i>Kabuli</i>    | Ca_Kabuli_Chr06              | 2037575                        | (G/T)       |
| 9526        | CakSNP9526     | <i>Kabuli</i>    | Ca_Kabuli_Chr06              | 2037599                        | (A/G)       |
| 9527        | CakSNP9527     | <i>Kabuli</i>    | Ca_Kabuli_Chr06              | 2037620                        | (T/G)       |
| 9528        | CakSNP9528     | <i>Kabuli</i>    | Ca_Kabuli_Chr06              | 2037623                        | (T/G)       |
| 9529        | CakSNP9529     | <i>Kabuli</i>    | Ca_Kabuli_Chr06              | 2037626                        | (C/T)       |
| 9530        | CakSNP9530     | <i>Kabuli</i>    | Ca_Kabuli_Chr06              | 2050907                        | (A/G)       |
| 9531        | CakSNP9531     | <i>Kabuli</i>    | Ca_Kabuli_Chr06              | 2061459                        | (A/G)       |
| 9532        | CakSNP9532     | <i>Kabuli</i>    | Ca_Kabuli_Chr06              | 2078416                        | (T/A)       |
| 9533        | CakSNP9533     | <i>Kabuli</i>    | Ca_Kabuli_Chr06              | 2079137                        | (T/G)       |
| 9534        | CakSNP9534     | <i>Kabuli</i>    | Ca_Kabuli_Chr06              | 2079186                        | (G/T)       |
| 9535        | CakSNP9535     | <i>Kabuli</i>    | Ca_Kabuli_Chr06              | 2083784                        | (A/T)       |
| 9536        | CakSNP9536     | <i>Kabuli</i>    | Ca_Kabuli_Chr06              | 2083805                        | (G/A)       |
| 9537        | CakSNP9537     | <i>Kabuli</i>    | Ca_Kabuli_Chr06              | 2083813                        | (T/C)       |

| <b>S.N.</b> | <b>SNP IDs</b> | <b>Cultivars</b> | <b>Chromosomes/scaffolds</b> | <b>Physical positions (bp)</b> | <b>SNPs</b> |
|-------------|----------------|------------------|------------------------------|--------------------------------|-------------|
| 9538        | CakSNP9538     | <i>Kabuli</i>    | Ca_Kabuli_Chr06              | 2126667                        | (C/T)       |
| 9539        | CakSNP9539     | <i>Kabuli</i>    | Ca_Kabuli_Chr06              | 2126655                        | (G/A)       |
| 9540        | CakSNP9540     | <i>Kabuli</i>    | Ca_Kabuli_Chr06              | 2140189                        | (G/T)       |
| 9541        | CakSNP9541     | <i>Kabuli</i>    | Ca_Kabuli_Chr06              | 2140406                        | (G/A)       |
| 9542        | CakSNP9542     | <i>Kabuli</i>    | Ca_Kabuli_Chr06              | 2193748                        | (T/A)       |
| 9543        | CakSNP9543     | <i>Kabuli</i>    | Ca_Kabuli_Chr06              | 2193763                        | (A/C)       |
| 9544        | CakSNP9544     | <i>Kabuli</i>    | Ca_Kabuli_Chr06              | 2193803                        | (G/A)       |
| 9545        | CakSNP9545     | <i>Kabuli</i>    | Ca_Kabuli_Chr06              | 2214131                        | (T/A)       |
| 9546        | CakSNP9546     | <i>Kabuli</i>    | Ca_Kabuli_Chr06              | 2214178                        | (T/C)       |
| 9547        | CakSNP9547     | <i>Kabuli</i>    | Ca_Kabuli_Chr06              | 2214247                        | (A/G)       |
| 9548        | CakSNP9548     | <i>Kabuli</i>    | Ca_Kabuli_Chr06              | 2223544                        | (A/T)       |
| 9549        | CakSNP9549     | <i>Kabuli</i>    | Ca_Kabuli_Chr06              | 2223578                        | (T/G)       |
| 9550        | CakSNP9550     | <i>Kabuli</i>    | Ca_Kabuli_Chr06              | 2223664                        | (A/C)       |
| 9551        | CakSNP9551     | <i>Kabuli</i>    | Ca_Kabuli_Chr06              | 2244901                        | (A/C)       |
| 9552        | CakSNP9552     | <i>Kabuli</i>    | Ca_Kabuli_Chr06              | 2275505                        | (A/G)       |
| 9553        | CakSNP9553     | <i>Kabuli</i>    | Ca_Kabuli_Chr06              | 2275524                        | (G/A)       |
| 9554        | CakSNP9554     | <i>Kabuli</i>    | Ca_Kabuli_Chr06              | 2275553                        | (A/G)       |
| 9555        | CakSNP9555     | <i>Kabuli</i>    | Ca_Kabuli_Chr06              | 2280734                        | (T/A)       |
| 9556        | CakSNP9556     | <i>Kabuli</i>    | Ca_Kabuli_Chr06              | 2280752                        | (A/G)       |
| 9557        | CakSNP9557     | <i>Kabuli</i>    | Ca_Kabuli_Chr06              | 2286205                        | (A/G)       |
| 9558        | CakSNP9558     | <i>Kabuli</i>    | Ca_Kabuli_Chr06              | 2286237                        | (C/T)       |
| 9559        | CakSNP9559     | <i>Kabuli</i>    | Ca_Kabuli_Chr06              | 2294911                        | (T/G)       |
| 9560        | CakSNP9560     | <i>Kabuli</i>    | Ca_Kabuli_Chr06              | 2303123                        | (T/G)       |
| 9561        | CakSNP9561     | <i>Kabuli</i>    | Ca_Kabuli_Chr06              | 2313683                        | (A/C)       |
| 9562        | CakSNP9562     | <i>Kabuli</i>    | Ca_Kabuli_Chr06              | 2313828                        | (G/A)       |
| 9563        | CakSNP9563     | <i>Kabuli</i>    | Ca_Kabuli_Chr06              | 2314029                        | (T/C)       |
| 9564        | CakSNP9564     | <i>Kabuli</i>    | Ca_Kabuli_Chr06              | 2327842                        | (A/G)       |
| 9565        | CakSNP9565     | <i>Kabuli</i>    | Ca_Kabuli_Chr06              | 2462481                        | (C/T)       |
| 9566        | CakSNP9566     | <i>Kabuli</i>    | Ca_Kabuli_Chr06              | 2502485                        | (A/G)       |
| 9567        | CakSNP9567     | <i>Kabuli</i>    | Ca_Kabuli_Chr06              | 2527768                        | (A/G)       |
| 9568        | CakSNP9568     | <i>Kabuli</i>    | Ca_Kabuli_Chr06              | 2542942                        | (A/T)       |
| 9569        | CakSNP9569     | <i>Kabuli</i>    | Ca_Kabuli_Chr06              | 2542981                        | (T/C)       |
| 9570        | CakSNP9570     | <i>Kabuli</i>    | Ca_Kabuli_Chr06              | 2543096                        | (C/T)       |
| 9571        | CakSNP9571     | <i>Kabuli</i>    | Ca_Kabuli_Chr06              | 2543062                        | (A/G)       |
| 9572        | CakSNP9572     | <i>Kabuli</i>    | Ca_Kabuli_Chr06              | 2548412                        | (A/G)       |
| 9573        | CakSNP9573     | <i>Kabuli</i>    | Ca_Kabuli_Chr06              | 2549997                        | (C/T)       |
| 9574        | CakSNP9574     | <i>Kabuli</i>    | Ca_Kabuli_Chr06              | 2549991                        | (T/C)       |
| 9575        | CakSNP9575     | <i>Kabuli</i>    | Ca_Kabuli_Chr06              | 2550154                        | (A/C)       |

| <b>S.N.</b> | <b>SNP IDs</b> | <b>Cultivars</b> | <b>Chromosomes/scaffolds</b> | <b>Physical positions (bp)</b> | <b>SNPs</b> |
|-------------|----------------|------------------|------------------------------|--------------------------------|-------------|
| 9576        | CakSNP9576     | <i>Kabuli</i>    | Ca_Kabuli_Chr06              | 2623370                        | (T/C)       |
| 9577        | CakSNP9577     | <i>Kabuli</i>    | Ca_Kabuli_Chr06              | 2625793                        | (C/G)       |
| 9578        | CakSNP9578     | <i>Kabuli</i>    | Ca_Kabuli_Chr06              | 2633941                        | (A/T)       |
| 9579        | CakSNP9579     | <i>Kabuli</i>    | Ca_Kabuli_Chr06              | 2639558                        | (T/A)       |
| 9580        | CakSNP9580     | <i>Kabuli</i>    | Ca_Kabuli_Chr06              | 2639606                        | (A/G)       |
| 9581        | CakSNP9581     | <i>Kabuli</i>    | Ca_Kabuli_Chr06              | 2639607                        | (T/C)       |
| 9582        | CakSNP9582     | <i>Kabuli</i>    | Ca_Kabuli_Chr06              | 2676594                        | (C/T)       |
| 9583        | CakSNP9583     | <i>Kabuli</i>    | Ca_Kabuli_Chr06              | 2714894                        | (T/C)       |
| 9584        | CakSNP9584     | <i>Kabuli</i>    | Ca_Kabuli_Chr06              | 2714897                        | (C/A)       |
| 9585        | CakSNP9585     | <i>Kabuli</i>    | Ca_Kabuli_Chr06              | 2714918                        | (T/G)       |
| 9586        | CakSNP9586     | <i>Kabuli</i>    | Ca_Kabuli_Chr06              | 2717150                        | (G/A)       |
| 9587        | CakSNP9587     | <i>Kabuli</i>    | Ca_Kabuli_Chr06              | 2740630                        | (A/G)       |
| 9588        | CakSNP9588     | <i>Kabuli</i>    | Ca_Kabuli_Chr06              | 2740765                        | (A/G)       |
| 9589        | CakSNP9589     | <i>Kabuli</i>    | Ca_Kabuli_Chr06              | 2740784                        | (T/C)       |
| 9590        | CakSNP9590     | <i>Kabuli</i>    | Ca_Kabuli_Chr06              | 2741185                        | (G/A)       |
| 9591        | CakSNP9591     | <i>Kabuli</i>    | Ca_Kabuli_Chr06              | 2777609                        | (A/G)       |
| 9592        | CakSNP9592     | <i>Kabuli</i>    | Ca_Kabuli_Chr06              | 2802942                        | (C/A)       |
| 9593        | CakSNP9593     | <i>Kabuli</i>    | Ca_Kabuli_Chr06              | 2811345                        | (A/G)       |
| 9594        | CakSNP9594     | <i>Kabuli</i>    | Ca_Kabuli_Chr06              | 2812794                        | (A/C)       |
| 9595        | CakSNP9595     | <i>Kabuli</i>    | Ca_Kabuli_Chr06              | 2812719                        | (G/A)       |
| 9596        | CakSNP9596     | <i>Kabuli</i>    | Ca_Kabuli_Chr06              | 2813244                        | (G/A)       |
| 9597        | CakSNP9597     | <i>Kabuli</i>    | Ca_Kabuli_Chr06              | 2821836                        | (G/T)       |
| 9598        | CakSNP9598     | <i>Kabuli</i>    | Ca_Kabuli_Chr06              | 2846051                        | (C/T)       |
| 9599        | CakSNP9599     | <i>Kabuli</i>    | Ca_Kabuli_Chr06              | 2846018                        | (T/C)       |
| 9600        | CakSNP9600     | <i>Kabuli</i>    | Ca_Kabuli_Chr06              | 2855691                        | (C/G)       |
| 9601        | CakSNP9601     | <i>Kabuli</i>    | Ca_Kabuli_Chr06              | 2864713                        | (G/A)       |
| 9602        | CakSNP9602     | <i>Kabuli</i>    | Ca_Kabuli_Chr06              | 2919355                        | (A/C)       |
| 9603        | CakSNP9603     | <i>Kabuli</i>    | Ca_Kabuli_Chr06              | 2925908                        | (A/G)       |
| 9604        | CakSNP9604     | <i>Kabuli</i>    | Ca_Kabuli_Chr06              | 2925962                        | (G/C)       |
| 9605        | CakSNP9605     | <i>Kabuli</i>    | Ca_Kabuli_Chr06              | 2926006                        | (T/C)       |
| 9606        | CakSNP9606     | <i>Kabuli</i>    | Ca_Kabuli_Chr06              | 2927224                        | (G/A)       |
| 9607        | CakSNP9607     | <i>Kabuli</i>    | Ca_Kabuli_Chr06              | 2927255                        | (C/A)       |
| 9608        | CakSNP9608     | <i>Kabuli</i>    | Ca_Kabuli_Chr06              | 2927271                        | (G/A)       |
| 9609        | CakSNP9609     | <i>Kabuli</i>    | Ca_Kabuli_Chr06              | 2927386                        | (C/G)       |
| 9610        | CakSNP9610     | <i>Kabuli</i>    | Ca_Kabuli_Chr06              | 2927387                        | (T/C)       |
| 9611        | CakSNP9611     | <i>Kabuli</i>    | Ca_Kabuli_Chr06              | 2929355                        | (C/T)       |
| 9612        | CakSNP9612     | <i>Kabuli</i>    | Ca_Kabuli_Chr06              | 2930453                        | (T/C)       |
| 9613        | CakSNP9613     | <i>Kabuli</i>    | Ca_Kabuli_Chr06              | 2930459                        | (C/T)       |

| <b>S.N.</b> | <b>SNP IDs</b> | <b>Cultivars</b> | <b>Chromosomes/scaffolds</b> | <b>Physical positions (bp)</b> | <b>SNPs</b> |
|-------------|----------------|------------------|------------------------------|--------------------------------|-------------|
| 9614        | CakSNP9614     | <i>Kabuli</i>    | Ca_Kabuli_Chr06              | 2930504                        | (T/C)       |
| 9615        | CakSNP9615     | <i>Kabuli</i>    | Ca_Kabuli_Chr06              | 2932029                        | (T/C)       |
| 9616        | CakSNP9616     | <i>Kabuli</i>    | Ca_Kabuli_Chr06              | 2932179                        | (T/G)       |
| 9617        | CakSNP9617     | <i>Kabuli</i>    | Ca_Kabuli_Chr06              | 2932168                        | (A/C)       |
| 9618        | CakSNP9618     | <i>Kabuli</i>    | Ca_Kabuli_Chr06              | 2932143                        | (C/A)       |
| 9619        | CakSNP9619     | <i>Kabuli</i>    | Ca_Kabuli_Chr06              | 2932130                        | (T/G)       |
| 9620        | CakSNP9620     | <i>Kabuli</i>    | Ca_Kabuli_Chr06              | 2932777                        | (A/G)       |
| 9621        | CakSNP9621     | <i>Kabuli</i>    | Ca_Kabuli_Chr06              | 2972319                        | (C/T)       |
| 9622        | CakSNP9622     | <i>Kabuli</i>    | Ca_Kabuli_Chr06              | 2972301                        | (T/C)       |
| 9623        | CakSNP9623     | <i>Kabuli</i>    | Ca_Kabuli_Chr06              | 2973741                        | (A/G)       |
| 9624        | CakSNP9624     | <i>Kabuli</i>    | Ca_Kabuli_Chr06              | 2973756                        | (A/C)       |
| 9625        | CakSNP9625     | <i>Kabuli</i>    | Ca_Kabuli_Chr06              | 3060508                        | (G/A)       |
| 9626        | CakSNP9626     | <i>Kabuli</i>    | Ca_Kabuli_Chr06              | 3060502                        | (G/A)       |
| 9627        | CakSNP9627     | <i>Kabuli</i>    | Ca_Kabuli_Chr06              | 3288481                        | (C/A)       |
| 9628        | CakSNP9628     | <i>Kabuli</i>    | Ca_Kabuli_Chr06              | 3288444                        | (G/A)       |
| 9629        | CakSNP9629     | <i>Kabuli</i>    | Ca_Kabuli_Chr06              | 3288441                        | (A/G)       |
| 9630        | CakSNP9630     | <i>Kabuli</i>    | Ca_Kabuli_Chr06              | 3288505                        | (G/T)       |
| 9631        | CakSNP9631     | <i>Kabuli</i>    | Ca_Kabuli_Chr06              | 3297086                        | (G/A)       |
| 9632        | CakSNP9632     | <i>Kabuli</i>    | Ca_Kabuli_Chr06              | 3298952                        | (A/T)       |
| 9633        | CakSNP9633     | <i>Kabuli</i>    | Ca_Kabuli_Chr06              | 3395024                        | (A/G)       |
| 9634        | CakSNP9634     | <i>Kabuli</i>    | Ca_Kabuli_Chr06              | 3395253                        | (G/A)       |
| 9635        | CakSNP9635     | <i>Kabuli</i>    | Ca_Kabuli_Chr06              | 3395370                        | (C/T)       |
| 9636        | CakSNP9636     | <i>Kabuli</i>    | Ca_Kabuli_Chr06              | 3397650                        | (A/G)       |
| 9637        | CakSNP9637     | <i>Kabuli</i>    | Ca_Kabuli_Chr06              | 3401260                        | (A/G)       |
| 9638        | CakSNP9638     | <i>Kabuli</i>    | Ca_Kabuli_Chr06              | 3401272                        | (G/A)       |
| 9639        | CakSNP9639     | <i>Kabuli</i>    | Ca_Kabuli_Chr06              | 3401277                        | (C/T)       |
| 9640        | CakSNP9640     | <i>Kabuli</i>    | Ca_Kabuli_Chr06              | 3482411                        | (A/G)       |
| 9641        | CakSNP9641     | <i>Kabuli</i>    | Ca_Kabuli_Chr06              | 3505662                        | (C/A)       |
| 9642        | CakSNP9642     | <i>Kabuli</i>    | Ca_Kabuli_Chr06              | 3530094                        | (T/C)       |
| 9643        | CakSNP9643     | <i>Kabuli</i>    | Ca_Kabuli_Chr06              | 3530137                        | (A/G)       |
| 9644        | CakSNP9644     | <i>Kabuli</i>    | Ca_Kabuli_Chr06              | 3548121                        | (C/A)       |
| 9645        | CakSNP9645     | <i>Kabuli</i>    | Ca_Kabuli_Chr06              | 3548114                        | (A/C)       |
| 9646        | CakSNP9646     | <i>Kabuli</i>    | Ca_Kabuli_Chr06              | 3786843                        | (A/G)       |
| 9647        | CakSNP9647     | <i>Kabuli</i>    | Ca_Kabuli_Chr06              | 3787239                        | (C/A)       |
| 9648        | CakSNP9648     | <i>Kabuli</i>    | Ca_Kabuli_Chr06              | 3829070                        | (C/A)       |
| 9649        | CakSNP9649     | <i>Kabuli</i>    | Ca_Kabuli_Chr06              | 3962516                        | (A/C)       |
| 9650        | CakSNP9650     | <i>Kabuli</i>    | Ca_Kabuli_Chr06              | 3985519                        | (G/A)       |
| 9651        | CakSNP9651     | <i>Kabuli</i>    | Ca_Kabuli_Chr06              | 3992419                        | (C/T)       |



| <b>S.N.</b> | <b>SNP IDs</b> | <b>Cultivars</b> | <b>Chromosomes/scaffolds</b> | <b>Physical positions (bp)</b> | <b>SNPs</b> |
|-------------|----------------|------------------|------------------------------|--------------------------------|-------------|
| 9652        | CakSNP9652     | <i>Kabuli</i>    | Ca_Kabuli_Chr06              | 4112085                        | (T/C)       |
| 9653        | CakSNP9653     | <i>Kabuli</i>    | Ca_Kabuli_Chr06              | 4226957                        | (G/A)       |
| 9654        | CakSNP9654     | <i>Kabuli</i>    | Ca_Kabuli_Chr06              | 4226947                        | (A/T)       |
| 9655        | CakSNP9655     | <i>Kabuli</i>    | Ca_Kabuli_Chr06              | 4226924                        | (G/T)       |
| 9656        | CakSNP9656     | <i>Kabuli</i>    | Ca_Kabuli_Chr06              | 4226951                        | (C/A)       |
| 9657        | CakSNP9657     | <i>Kabuli</i>    | Ca_Kabuli_Chr06              | 4228728                        | (T/C)       |
| 9658        | CakSNP9658     | <i>Kabuli</i>    | Ca_Kabuli_Chr06              | 4228759                        | (C/G)       |
| 9659        | CakSNP9659     | <i>Kabuli</i>    | Ca_Kabuli_Chr06              | 4228884                        | (T/C)       |
| 9660        | CakSNP9660     | <i>Kabuli</i>    | Ca_Kabuli_Chr06              | 4344604                        | (T/C)       |
| 9661        | CakSNP9661     | <i>Kabuli</i>    | Ca_Kabuli_Chr06              | 4350822                        | (A/T)       |
| 9662        | CakSNP9662     | <i>Kabuli</i>    | Ca_Kabuli_Chr06              | 4350867                        | (A/C)       |
| 9663        | CakSNP9663     | <i>Kabuli</i>    | Ca_Kabuli_Chr06              | 4350889                        | (A/C)       |
| 9664        | CakSNP9664     | <i>Kabuli</i>    | Ca_Kabuli_Chr06              | 4440034                        | (T/G)       |
| 9665        | CakSNP9665     | <i>Kabuli</i>    | Ca_Kabuli_Chr06              | 4562263                        | (C/A)       |
| 9666        | CakSNP9666     | <i>Kabuli</i>    | Ca_Kabuli_Chr06              | 4562264                        | (C/G)       |
| 9667        | CakSNP9667     | <i>Kabuli</i>    | Ca_Kabuli_Chr06              | 4601303                        | (A/C)       |
| 9668        | CakSNP9668     | <i>Kabuli</i>    | Ca_Kabuli_Chr06              | 4678523                        | (A/C)       |
| 9669        | CakSNP9669     | <i>Kabuli</i>    | Ca_Kabuli_Chr06              | 4681686                        | (C/A)       |
| 9670        | CakSNP9670     | <i>Kabuli</i>    | Ca_Kabuli_Chr06              | 4743563                        | (C/G)       |
| 9671        | CakSNP9671     | <i>Kabuli</i>    | Ca_Kabuli_Chr06              | 4743608                        | (C/T)       |
| 9672        | CakSNP9672     | <i>Kabuli</i>    | Ca_Kabuli_Chr06              | 4807908                        | (G/C)       |
| 9673        | CakSNP9673     | <i>Kabuli</i>    | Ca_Kabuli_Chr06              | 4858109                        | (T/C)       |
| 9674        | CakSNP9674     | <i>Kabuli</i>    | Ca_Kabuli_Chr06              | 4861184                        | (T/G)       |
| 9675        | CakSNP9675     | <i>Kabuli</i>    | Ca_Kabuli_Chr06              | 4981078                        | (G/T)       |
| 9676        | CakSNP9676     | <i>Kabuli</i>    | Ca_Kabuli_Chr06              | 5185380                        | (A/G)       |
| 9677        | CakSNP9677     | <i>Kabuli</i>    | Ca_Kabuli_Chr06              | 5309445                        | (G/A)       |
| 9678        | CakSNP9678     | <i>Kabuli</i>    | Ca_Kabuli_Chr06              | 5338761                        | (T/G)       |
| 9679        | CakSNP9679     | <i>Kabuli</i>    | Ca_Kabuli_Chr06              | 5341510                        | (C/A)       |
| 9680        | CakSNP9680     | <i>Kabuli</i>    | Ca_Kabuli_Chr06              | 5366094                        | (A/G)       |
| 9681        | CakSNP9681     | <i>Kabuli</i>    | Ca_Kabuli_Chr06              | 5368455                        | (T/G)       |
| 9682        | CakSNP9682     | <i>Kabuli</i>    | Ca_Kabuli_Chr06              | 5392161                        | (G/A)       |
| 9683        | CakSNP9683     | <i>Kabuli</i>    | Ca_Kabuli_Chr06              | 5392185                        | (T/C)       |
| 9684        | CakSNP9684     | <i>Kabuli</i>    | Ca_Kabuli_Chr06              | 5396888                        | (T/G)       |
| 9685        | CakSNP9685     | <i>Kabuli</i>    | Ca_Kabuli_Chr06              | 5396890                        | (T/G)       |
| 9686        | CakSNP9686     | <i>Kabuli</i>    | Ca_Kabuli_Chr06              | 5396897                        | (T/G)       |
| 9687        | CakSNP9687     | <i>Kabuli</i>    | Ca_Kabuli_Chr06              | 5396913                        | (C/T)       |
| 9688        | CakSNP9688     | <i>Kabuli</i>    | Ca_Kabuli_Chr06              | 5396916                        | (C/T)       |
| 9689        | CakSNP9689     | <i>Kabuli</i>    | Ca_Kabuli_Chr06              | 5401307                        | (T/C)       |

| <b>S.N.</b> | <b>SNP IDs</b> | <b>Cultivars</b> | <b>Chromosomes/scaffolds</b> | <b>Physical positions (bp)</b> | <b>SNPs</b> |
|-------------|----------------|------------------|------------------------------|--------------------------------|-------------|
| 9690        | CakSNP9690     | <i>Kabuli</i>    | Ca_Kabuli_Chr06              | 5453512                        | (A/G)       |
| 9691        | CakSNP9691     | <i>Kabuli</i>    | Ca_Kabuli_Chr06              | 5498898                        | (C/T)       |
| 9692        | CakSNP9692     | <i>Kabuli</i>    | Ca_Kabuli_Chr06              | 5500791                        | (C/T)       |
| 9693        | CakSNP9693     | <i>Kabuli</i>    | Ca_Kabuli_Chr06              | 5501363                        | (T/C)       |
| 9694        | CakSNP9694     | <i>Kabuli</i>    | Ca_Kabuli_Chr06              | 5541264                        | (A/G)       |
| 9695        | CakSNP9695     | <i>Kabuli</i>    | Ca_Kabuli_Chr06              | 5567967                        | (T/C)       |
| 9696        | CakSNP9696     | <i>Kabuli</i>    | Ca_Kabuli_Chr06              | 5589373                        | (T/C)       |
| 9697        | CakSNP9697     | <i>Kabuli</i>    | Ca_Kabuli_Chr06              | 5616372                        | (C/T)       |
| 9698        | CakSNP9698     | <i>Kabuli</i>    | Ca_Kabuli_Chr06              | 5616482                        | (A/G)       |
| 9699        | CakSNP9699     | <i>Kabuli</i>    | Ca_Kabuli_Chr06              | 5616454                        | (T/A)       |
| 9700        | CakSNP9700     | <i>Kabuli</i>    | Ca_Kabuli_Chr06              | 5628948                        | (C/A)       |
| 9701        | CakSNP9701     | <i>Kabuli</i>    | Ca_Kabuli_Chr06              | 5628956                        | (T/G)       |
| 9702        | CakSNP9702     | <i>Kabuli</i>    | Ca_Kabuli_Chr06              | 5692120                        | (C/A)       |
| 9703        | CakSNP9703     | <i>Kabuli</i>    | Ca_Kabuli_Chr06              | 5694397                        | (G/T)       |
| 9704        | CakSNP9704     | <i>Kabuli</i>    | Ca_Kabuli_Chr06              | 5701004                        | (A/G)       |
| 9705        | CakSNP9705     | <i>Kabuli</i>    | Ca_Kabuli_Chr06              | 5704845                        | (T/C)       |
| 9706        | CakSNP9706     | <i>Kabuli</i>    | Ca_Kabuli_Chr06              | 5704809                        | (T/A)       |
| 9707        | CakSNP9707     | <i>Kabuli</i>    | Ca_Kabuli_Chr06              | 5706649                        | (C/T)       |
| 9708        | CakSNP9708     | <i>Kabuli</i>    | Ca_Kabuli_Chr06              | 5841443                        | (G/C)       |
| 9709        | CakSNP9709     | <i>Kabuli</i>    | Ca_Kabuli_Chr06              | 5871537                        | (G/A)       |
| 9710        | CakSNP9710     | <i>Kabuli</i>    | Ca_Kabuli_Chr06              | 5886393                        | (A/G)       |
| 9711        | CakSNP9711     | <i>Kabuli</i>    | Ca_Kabuli_Chr06              | 5888423                        | (A/G)       |
| 9712        | CakSNP9712     | <i>Kabuli</i>    | Ca_Kabuli_Chr06              | 5924967                        | (G/T)       |
| 9713        | CakSNP9713     | <i>Kabuli</i>    | Ca_Kabuli_Chr06              | 5925028                        | (G/T)       |
| 9714        | CakSNP9714     | <i>Kabuli</i>    | Ca_Kabuli_Chr06              | 6110805                        | (T/C)       |
| 9715        | CakSNP9715     | <i>Kabuli</i>    | Ca_Kabuli_Chr06              | 6119644                        | (C/A)       |
| 9716        | CakSNP9716     | <i>Kabuli</i>    | Ca_Kabuli_Chr06              | 6131564                        | (G/A)       |
| 9717        | CakSNP9717     | <i>Kabuli</i>    | Ca_Kabuli_Chr06              | 6131518                        | (G/T)       |
| 9718        | CakSNP9718     | <i>Kabuli</i>    | Ca_Kabuli_Chr06              | 6131514                        | (G/T)       |
| 9719        | CakSNP9719     | <i>Kabuli</i>    | Ca_Kabuli_Chr06              | 6169291                        | (A/G)       |
| 9720        | CakSNP9720     | <i>Kabuli</i>    | Ca_Kabuli_Chr06              | 6192895                        | (A/T)       |
| 9721        | CakSNP9721     | <i>Kabuli</i>    | Ca_Kabuli_Chr06              | 6193105                        | (G/C)       |
| 9722        | CakSNP9722     | <i>Kabuli</i>    | Ca_Kabuli_Chr06              | 6216766                        | (T/G)       |
| 9723        | CakSNP9723     | <i>Kabuli</i>    | Ca_Kabuli_Chr06              | 6216746                        | (G/C)       |
| 9724        | CakSNP9724     | <i>Kabuli</i>    | Ca_Kabuli_Chr06              | 6227887                        | (A/G)       |
| 9725        | CakSNP9725     | <i>Kabuli</i>    | Ca_Kabuli_Chr06              | 6248260                        | (T/C)       |
| 9726        | CakSNP9726     | <i>Kabuli</i>    | Ca_Kabuli_Chr06              | 6248203                        | (A/G)       |
| 9727        | CakSNP9727     | <i>Kabuli</i>    | Ca_Kabuli_Chr06              | 6415818                        | (A/G)       |

| <b>S.N.</b> | <b>SNP IDs</b> | <b>Cultivars</b> | <b>Chromosomes/scaffolds</b> | <b>Physical positions (bp)</b> | <b>SNPs</b> |
|-------------|----------------|------------------|------------------------------|--------------------------------|-------------|
| 9728        | CakSNP9728     | <i>Kabuli</i>    | Ca_Kabuli_Chr06              | 6443828                        | (C/G)       |
| 9729        | CakSNP9729     | <i>Kabuli</i>    | Ca_Kabuli_Chr06              | 6444169                        | (A/G)       |
| 9730        | CakSNP9730     | <i>Kabuli</i>    | Ca_Kabuli_Chr06              | 6444226                        | (T/G)       |
| 9731        | CakSNP9731     | <i>Kabuli</i>    | Ca_Kabuli_Chr06              | 6444243                        | (G/A)       |
| 9732        | CakSNP9732     | <i>Kabuli</i>    | Ca_Kabuli_Chr06              | 6444220                        | (G/A)       |
| 9733        | CakSNP9733     | <i>Kabuli</i>    | Ca_Kabuli_Chr06              | 6517785                        | (T/C)       |
| 9734        | CakSNP9734     | <i>Kabuli</i>    | Ca_Kabuli_Chr06              | 6517849                        | (C/T)       |
| 9735        | CakSNP9735     | <i>Kabuli</i>    | Ca_Kabuli_Chr06              | 6538236                        | (C/T)       |
| 9736        | CakSNP9736     | <i>Kabuli</i>    | Ca_Kabuli_Chr06              | 6604713                        | (G/A)       |
| 9737        | CakSNP9737     | <i>Kabuli</i>    | Ca_Kabuli_Chr06              | 6604766                        | (C/A)       |
| 9738        | CakSNP9738     | <i>Kabuli</i>    | Ca_Kabuli_Chr06              | 6607773                        | (A/G)       |
| 9739        | CakSNP9739     | <i>Kabuli</i>    | Ca_Kabuli_Chr06              | 6631216                        | (C/T)       |
| 9740        | CakSNP9740     | <i>Kabuli</i>    | Ca_Kabuli_Chr06              | 6654917                        | (T/C)       |
| 9741        | CakSNP9741     | <i>Kabuli</i>    | Ca_Kabuli_Chr06              | 6764292                        | (G/A)       |
| 9742        | CakSNP9742     | <i>Kabuli</i>    | Ca_Kabuli_Chr06              | 6779147                        | (G/C)       |
| 9743        | CakSNP9743     | <i>Kabuli</i>    | Ca_Kabuli_Chr06              | 6779982                        | (C/T)       |
| 9744        | CakSNP9744     | <i>Kabuli</i>    | Ca_Kabuli_Chr06              | 6792012                        | (C/T)       |
| 9745        | CakSNP9745     | <i>Kabuli</i>    | Ca_Kabuli_Chr06              | 6800935                        | (A/T)       |
| 9746        | CakSNP9746     | <i>Kabuli</i>    | Ca_Kabuli_Chr06              | 6800927                        | (G/T)       |
| 9747        | CakSNP9747     | <i>Kabuli</i>    | Ca_Kabuli_Chr06              | 6800877                        | (T/A)       |
| 9748        | CakSNP9748     | <i>Kabuli</i>    | Ca_Kabuli_Chr06              | 6802259                        | (C/T)       |
| 9749        | CakSNP9749     | <i>Kabuli</i>    | Ca_Kabuli_Chr06              | 6802651                        | (A/G)       |
| 9750        | CakSNP9750     | <i>Kabuli</i>    | Ca_Kabuli_Chr06              | 6803433                        | (A/G)       |
| 9751        | CakSNP9751     | <i>Kabuli</i>    | Ca_Kabuli_Chr06              | 6815594                        | (G/A)       |
| 9752        | CakSNP9752     | <i>Kabuli</i>    | Ca_Kabuli_Chr06              | 6840803                        | (T/C)       |
| 9753        | CakSNP9753     | <i>Kabuli</i>    | Ca_Kabuli_Chr06              | 6853983                        | (G/A)       |
| 9754        | CakSNP9754     | <i>Kabuli</i>    | Ca_Kabuli_Chr06              | 6871801                        | (A/G)       |
| 9755        | CakSNP9755     | <i>Kabuli</i>    | Ca_Kabuli_Chr06              | 6877020                        | (C/G)       |
| 9756        | CakSNP9756     | <i>Kabuli</i>    | Ca_Kabuli_Chr06              | 6877088                        | (C/A)       |
| 9757        | CakSNP9757     | <i>Kabuli</i>    | Ca_Kabuli_Chr06              | 6877163                        | (T/C)       |
| 9758        | CakSNP9758     | <i>Kabuli</i>    | Ca_Kabuli_Chr06              | 6877246                        | (C/A)       |
| 9759        | CakSNP9759     | <i>Kabuli</i>    | Ca_Kabuli_Chr06              | 6877284                        | (C/T)       |
| 9760        | CakSNP9760     | <i>Kabuli</i>    | Ca_Kabuli_Chr06              | 6899977                        | (G/A)       |
| 9761        | CakSNP9761     | <i>Kabuli</i>    | Ca_Kabuli_Chr06              | 6899949                        | (T/G)       |
| 9762        | CakSNP9762     | <i>Kabuli</i>    | Ca_Kabuli_Chr06              | 6913639                        | (T/C)       |
| 9763        | CakSNP9763     | <i>Kabuli</i>    | Ca_Kabuli_Chr06              | 6913622                        | (A/C)       |
| 9764        | CakSNP9764     | <i>Kabuli</i>    | Ca_Kabuli_Chr06              | 6913695                        | (G/A)       |
| 9765        | CakSNP9765     | <i>Kabuli</i>    | Ca_Kabuli_Chr06              | 6913825                        | (G/A)       |

| <b>S.N.</b> | <b>SNP IDs</b> | <b>Cultivars</b> | <b>Chromosomes/scaffolds</b> | <b>Physical positions (bp)</b> | <b>SNPs</b> |
|-------------|----------------|------------------|------------------------------|--------------------------------|-------------|
| 9766        | CakSNP9766     | <i>Kabuli</i>    | Ca_Kabuli_Chr06              | 6913821                        | (A/T)       |
| 9767        | CakSNP9767     | <i>Kabuli</i>    | Ca_Kabuli_Chr06              | 6954468                        | (A/G)       |
| 9768        | CakSNP9768     | <i>Kabuli</i>    | Ca_Kabuli_Chr06              | 6954480                        | (A/G)       |
| 9769        | CakSNP9769     | <i>Kabuli</i>    | Ca_Kabuli_Chr06              | 7026495                        | (G/A)       |
| 9770        | CakSNP9770     | <i>Kabuli</i>    | Ca_Kabuli_Chr06              | 7026481                        | (G/C)       |
| 9771        | CakSNP9771     | <i>Kabuli</i>    | Ca_Kabuli_Chr06              | 7039578                        | (C/T)       |
| 9772        | CakSNP9772     | <i>Kabuli</i>    | Ca_Kabuli_Chr06              | 7040231                        | (A/C)       |
| 9773        | CakSNP9773     | <i>Kabuli</i>    | Ca_Kabuli_Chr06              | 7138381                        | (G/A)       |
| 9774        | CakSNP9774     | <i>Kabuli</i>    | Ca_Kabuli_Chr06              | 7259533                        | (T/A)       |
| 9775        | CakSNP9775     | <i>Kabuli</i>    | Ca_Kabuli_Chr06              | 7271634                        | (C/T)       |
| 9776        | CakSNP9776     | <i>Kabuli</i>    | Ca_Kabuli_Chr06              | 7332579                        | (T/C)       |
| 9777        | CakSNP9777     | <i>Kabuli</i>    | Ca_Kabuli_Chr06              | 7332585                        | (T/C)       |
| 9778        | CakSNP9778     | <i>Kabuli</i>    | Ca_Kabuli_Chr06              | 7332762                        | (C/T)       |
| 9779        | CakSNP9779     | <i>Kabuli</i>    | Ca_Kabuli_Chr06              | 7349517                        | (A/C)       |
| 9780        | CakSNP9780     | <i>Kabuli</i>    | Ca_Kabuli_Chr06              | 7377229                        | (G/A)       |
| 9781        | CakSNP9781     | <i>Kabuli</i>    | Ca_Kabuli_Chr06              | 7377276                        | (G/A)       |
| 9782        | CakSNP9782     | <i>Kabuli</i>    | Ca_Kabuli_Chr06              | 7406219                        | (A/G)       |
| 9783        | CakSNP9783     | <i>Kabuli</i>    | Ca_Kabuli_Chr06              | 7406233                        | (G/A)       |
| 9784        | CakSNP9784     | <i>Kabuli</i>    | Ca_Kabuli_Chr06              | 7406301                        | (T/C)       |
| 9785        | CakSNP9785     | <i>Kabuli</i>    | Ca_Kabuli_Chr06              | 7531353                        | (G/A)       |
| 9786        | CakSNP9786     | <i>Kabuli</i>    | Ca_Kabuli_Chr06              | 7531445                        | (G/A)       |
| 9787        | CakSNP9787     | <i>Kabuli</i>    | Ca_Kabuli_Chr06              | 7531456                        | (T/A)       |
| 9788        | CakSNP9788     | <i>Kabuli</i>    | Ca_Kabuli_Chr06              | 7534360                        | (G/T)       |
| 9789        | CakSNP9789     | <i>Kabuli</i>    | Ca_Kabuli_Chr06              | 7543580                        | (C/T)       |
| 9790        | CakSNP9790     | <i>Kabuli</i>    | Ca_Kabuli_Chr06              | 7554094                        | (T/A)       |
| 9791        | CakSNP9791     | <i>Kabuli</i>    | Ca_Kabuli_Chr06              | 7571950                        | (T/C)       |
| 9792        | CakSNP9792     | <i>Kabuli</i>    | Ca_Kabuli_Chr06              | 7582726                        | (G/T)       |
| 9793        | CakSNP9793     | <i>Kabuli</i>    | Ca_Kabuli_Chr06              | 7600817                        | (G/A)       |
| 9794        | CakSNP9794     | <i>Kabuli</i>    | Ca_Kabuli_Chr06              | 7603195                        | (G/A)       |
| 9795        | CakSNP9795     | <i>Kabuli</i>    | Ca_Kabuli_Chr06              | 7603178                        | (A/C)       |
| 9796        | CakSNP9796     | <i>Kabuli</i>    | Ca_Kabuli_Chr06              | 7609814                        | (C/T)       |
| 9797        | CakSNP9797     | <i>Kabuli</i>    | Ca_Kabuli_Chr06              | 7647907                        | (T/G)       |
| 9798        | CakSNP9798     | <i>Kabuli</i>    | Ca_Kabuli_Chr06              | 7647931                        | (G/A)       |
| 9799        | CakSNP9799     | <i>Kabuli</i>    | Ca_Kabuli_Chr06              | 7661930                        | (T/G)       |
| 9800        | CakSNP9800     | <i>Kabuli</i>    | Ca_Kabuli_Chr06              | 7661924                        | (T/C)       |
| 9801        | CakSNP9801     | <i>Kabuli</i>    | Ca_Kabuli_Chr06              | 7667301                        | (T/C)       |
| 9802        | CakSNP9802     | <i>Kabuli</i>    | Ca_Kabuli_Chr06              | 7667328                        | (A/T)       |
| 9803        | CakSNP9803     | <i>Kabuli</i>    | Ca_Kabuli_Chr06              | 7673403                        | (C/T)       |

| <b>S.N.</b> | <b>SNP IDs</b> | <b>Cultivars</b> | <b>Chromosomes/scaffolds</b> | <b>Physical positions (bp)</b> | <b>SNPs</b> |
|-------------|----------------|------------------|------------------------------|--------------------------------|-------------|
| 9804        | CakSNP9804     | <i>Kabuli</i>    | Ca_Kabuli_Chr06              | 7694609                        | (A/T)       |
| 9805        | CakSNP9805     | <i>Kabuli</i>    | Ca_Kabuli_Chr06              | 7694625                        | (G/T)       |
| 9806        | CakSNP9806     | <i>Kabuli</i>    | Ca_Kabuli_Chr06              | 7694696                        | (T/C)       |
| 9807        | CakSNP9807     | <i>Kabuli</i>    | Ca_Kabuli_Chr06              | 7744730                        | (A/G)       |
| 9808        | CakSNP9808     | <i>Kabuli</i>    | Ca_Kabuli_Chr06              | 7744752                        | (T/C)       |
| 9809        | CakSNP9809     | <i>Kabuli</i>    | Ca_Kabuli_Chr06              | 7745641                        | (A/G)       |
| 9810        | CakSNP9810     | <i>Kabuli</i>    | Ca_Kabuli_Chr06              | 7747254                        | (G/A)       |
| 9811        | CakSNP9811     | <i>Kabuli</i>    | Ca_Kabuli_Chr06              | 7764968                        | (A/G)       |
| 9812        | CakSNP9812     | <i>Kabuli</i>    | Ca_Kabuli_Chr06              | 7770357                        | (C/T)       |
| 9813        | CakSNP9813     | <i>Kabuli</i>    | Ca_Kabuli_Chr06              | 7805886                        | (G/T)       |
| 9814        | CakSNP9814     | <i>Kabuli</i>    | Ca_Kabuli_Chr06              | 7821850                        | (A/G)       |
| 9815        | CakSNP9815     | <i>Kabuli</i>    | Ca_Kabuli_Chr06              | 7822666                        | (C/A)       |
| 9816        | CakSNP9816     | <i>Kabuli</i>    | Ca_Kabuli_Chr06              | 7829485                        | (G/A)       |
| 9817        | CakSNP9817     | <i>Kabuli</i>    | Ca_Kabuli_Chr06              | 7829627                        | (T/G)       |
| 9818        | CakSNP9818     | <i>Kabuli</i>    | Ca_Kabuli_Chr06              | 7831214                        | (C/T)       |
| 9819        | CakSNP9819     | <i>Kabuli</i>    | Ca_Kabuli_Chr06              | 7831409                        | (C/T)       |
| 9820        | CakSNP9820     | <i>Kabuli</i>    | Ca_Kabuli_Chr06              | 7831585                        | (G/A)       |
| 9821        | CakSNP9821     | <i>Kabuli</i>    | Ca_Kabuli_Chr06              | 7831874                        | (A/G)       |
| 9822        | CakSNP9822     | <i>Kabuli</i>    | Ca_Kabuli_Chr06              | 7831898                        | (G/A)       |
| 9823        | CakSNP9823     | <i>Kabuli</i>    | Ca_Kabuli_Chr06              | 7831899                        | (G/A)       |
| 9824        | CakSNP9824     | <i>Kabuli</i>    | Ca_Kabuli_Chr06              | 7832029                        | (C/T)       |
| 9825        | CakSNP9825     | <i>Kabuli</i>    | Ca_Kabuli_Chr06              | 7832023                        | (C/T)       |
| 9826        | CakSNP9826     | <i>Kabuli</i>    | Ca_Kabuli_Chr06              | 7834595                        | (C/T)       |
| 9827        | CakSNP9827     | <i>Kabuli</i>    | Ca_Kabuli_Chr06              | 7834922                        | (G/A)       |
| 9828        | CakSNP9828     | <i>Kabuli</i>    | Ca_Kabuli_Chr06              | 7834895                        | (G/T)       |
| 9829        | CakSNP9829     | <i>Kabuli</i>    | Ca_Kabuli_Chr06              | 7834976                        | (G/A)       |
| 9830        | CakSNP9830     | <i>Kabuli</i>    | Ca_Kabuli_Chr06              | 7835427                        | (G/A)       |
| 9831        | CakSNP9831     | <i>Kabuli</i>    | Ca_Kabuli_Chr06              | 7835738                        | (C/T)       |
| 9832        | CakSNP9832     | <i>Kabuli</i>    | Ca_Kabuli_Chr06              | 7835984                        | (T/A)       |
| 9833        | CakSNP9833     | <i>Kabuli</i>    | Ca_Kabuli_Chr06              | 7851000                        | (G/C)       |
| 9834        | CakSNP9834     | <i>Kabuli</i>    | Ca_Kabuli_Chr06              | 7929263                        | (C/T)       |
| 9835        | CakSNP9835     | <i>Kabuli</i>    | Ca_Kabuli_Chr06              | 7929338                        | (T/C)       |
| 9836        | CakSNP9836     | <i>Kabuli</i>    | Ca_Kabuli_Chr06              | 7929339                        | (G/A)       |
| 9837        | CakSNP9837     | <i>Kabuli</i>    | Ca_Kabuli_Chr06              | 7929348                        | (C/T)       |
| 9838        | CakSNP9838     | <i>Kabuli</i>    | Ca_Kabuli_Chr06              | 7929384                        | (T/C)       |
| 9839        | CakSNP9839     | <i>Kabuli</i>    | Ca_Kabuli_Chr06              | 7929493                        | (A/G)       |
| 9840        | CakSNP9840     | <i>Kabuli</i>    | Ca_Kabuli_Chr06              | 7929629                        | (G/A)       |
| 9841        | CakSNP9841     | <i>Kabuli</i>    | Ca_Kabuli_Chr06              | 7929628                        | (C/T)       |

| <b>S.N.</b> | <b>SNP IDs</b> | <b>Cultivars</b> | <b>Chromosomes/scaffolds</b> | <b>Physical positions (bp)</b> | <b>SNPs</b> |
|-------------|----------------|------------------|------------------------------|--------------------------------|-------------|
| 9842        | CakSNP9842     | <i>Kabuli</i>    | Ca_Kabuli_Chr06              | 7929607                        | (A/C)       |
| 9843        | CakSNP9843     | <i>Kabuli</i>    | Ca_Kabuli_Chr06              | 7939277                        | (T/A)       |
| 9844        | CakSNP9844     | <i>Kabuli</i>    | Ca_Kabuli_Chr06              | 7939281                        | (T/G)       |
| 9845        | CakSNP9845     | <i>Kabuli</i>    | Ca_Kabuli_Chr06              | 7939465                        | (A/G)       |
| 9846        | CakSNP9846     | <i>Kabuli</i>    | Ca_Kabuli_Chr06              | 7943546                        | (C/G)       |
| 9847        | CakSNP9847     | <i>Kabuli</i>    | Ca_Kabuli_Chr06              | 7994732                        | (G/T)       |
| 9848        | CakSNP9848     | <i>Kabuli</i>    | Ca_Kabuli_Chr06              | 8010016                        | (T/C)       |
| 9849        | CakSNP9849     | <i>Kabuli</i>    | Ca_Kabuli_Chr06              | 8011685                        | (G/T)       |
| 9850        | CakSNP9850     | <i>Kabuli</i>    | Ca_Kabuli_Chr06              | 8029226                        | (C/T)       |
| 9851        | CakSNP9851     | <i>Kabuli</i>    | Ca_Kabuli_Chr06              | 8041582                        | (A/G)       |
| 9852        | CakSNP9852     | <i>Kabuli</i>    | Ca_Kabuli_Chr06              | 8052987                        | (G/C)       |
| 9853        | CakSNP9853     | <i>Kabuli</i>    | Ca_Kabuli_Chr06              | 8076394                        | (T/C)       |
| 9854        | CakSNP9854     | <i>Kabuli</i>    | Ca_Kabuli_Chr06              | 8076446                        | (G/A)       |
| 9855        | CakSNP9855     | <i>Kabuli</i>    | Ca_Kabuli_Chr06              | 8081800                        | (C/G)       |
| 9856        | CakSNP9856     | <i>Kabuli</i>    | Ca_Kabuli_Chr06              | 8084950                        | (T/A)       |
| 9857        | CakSNP9857     | <i>Kabuli</i>    | Ca_Kabuli_Chr06              | 8090739                        | (T/A)       |
| 9858        | CakSNP9858     | <i>Kabuli</i>    | Ca_Kabuli_Chr06              | 8090980                        | (A/G)       |
| 9859        | CakSNP9859     | <i>Kabuli</i>    | Ca_Kabuli_Chr06              | 8091050                        | (A/G)       |
| 9860        | CakSNP9860     | <i>Kabuli</i>    | Ca_Kabuli_Chr06              | 8139434                        | (G/A)       |
| 9861        | CakSNP9861     | <i>Kabuli</i>    | Ca_Kabuli_Chr06              | 8139446                        | (C/A)       |
| 9862        | CakSNP9862     | <i>Kabuli</i>    | Ca_Kabuli_Chr06              | 8166317                        | (T/C)       |
| 9863        | CakSNP9863     | <i>Kabuli</i>    | Ca_Kabuli_Chr06              | 8166339                        | (T/C)       |
| 9864        | CakSNP9864     | <i>Kabuli</i>    | Ca_Kabuli_Chr06              | 8166435                        | (A/G)       |
| 9865        | CakSNP9865     | <i>Kabuli</i>    | Ca_Kabuli_Chr06              | 8166462                        | (A/T)       |
| 9866        | CakSNP9866     | <i>Kabuli</i>    | Ca_Kabuli_Chr06              | 8170583                        | (C/T)       |
| 9867        | CakSNP9867     | <i>Kabuli</i>    | Ca_Kabuli_Chr06              | 8170633                        | (A/G)       |
| 9868        | CakSNP9868     | <i>Kabuli</i>    | Ca_Kabuli_Chr06              | 8179815                        | (T/C)       |
| 9869        | CakSNP9869     | <i>Kabuli</i>    | Ca_Kabuli_Chr06              | 8179797                        | (C/T)       |
| 9870        | CakSNP9870     | <i>Kabuli</i>    | Ca_Kabuli_Chr06              | 8221204                        | (C/A)       |
| 9871        | CakSNP9871     | <i>Kabuli</i>    | Ca_Kabuli_Chr06              | 8222666                        | (T/C)       |
| 9872        | CakSNP9872     | <i>Kabuli</i>    | Ca_Kabuli_Chr06              | 8222685                        | (A/T)       |
| 9873        | CakSNP9873     | <i>Kabuli</i>    | Ca_Kabuli_Chr06              | 8223986                        | (C/G)       |
| 9874        | CakSNP9874     | <i>Kabuli</i>    | Ca_Kabuli_Chr06              | 8237286                        | (A/G)       |
| 9875        | CakSNP9875     | <i>Kabuli</i>    | Ca_Kabuli_Chr06              | 8243936                        | (A/T)       |
| 9876        | CakSNP9876     | <i>Kabuli</i>    | Ca_Kabuli_Chr06              | 8243947                        | (T/C)       |
| 9877        | CakSNP9877     | <i>Kabuli</i>    | Ca_Kabuli_Chr06              | 8244152                        | (C/T)       |
| 9878        | CakSNP9878     | <i>Kabuli</i>    | Ca_Kabuli_Chr06              | 8244249                        | (C/T)       |
| 9879        | CakSNP9879     | <i>Kabuli</i>    | Ca_Kabuli_Chr06              | 8246037                        | (T/C)       |

| <b>S.N.</b> | <b>SNP IDs</b> | <b>Cultivars</b> | <b>Chromosomes/scaffolds</b> | <b>Physical positions (bp)</b> | <b>SNPs</b> |
|-------------|----------------|------------------|------------------------------|--------------------------------|-------------|
| 9880        | CakSNP9880     | <i>Kabuli</i>    | Ca_Kabuli_Ch06               | 8246187                        | (A/C)       |
| 9881        | CakSNP9881     | <i>Kabuli</i>    | Ca_Kabuli_Ch06               | 8248202                        | (A/C)       |
| 9882        | CakSNP9882     | <i>Kabuli</i>    | Ca_Kabuli_Ch06               | 8251365                        | (T/C)       |
| 9883        | CakSNP9883     | <i>Kabuli</i>    | Ca_Kabuli_Ch06               | 8269326                        | (A/C)       |
| 9884        | CakSNP9884     | <i>Kabuli</i>    | Ca_Kabuli_Ch06               | 8285170                        | (G/A)       |
| 9885        | CakSNP9885     | <i>Kabuli</i>    | Ca_Kabuli_Ch06               | 8285147                        | (A/G)       |
| 9886        | CakSNP9886     | <i>Kabuli</i>    | Ca_Kabuli_Ch06               | 8633231                        | (C/A)       |
| 9887        | CakSNP9887     | <i>Kabuli</i>    | Ca_Kabuli_Ch06               | 8633215                        | (C/A)       |
| 9888        | CakSNP9888     | <i>Kabuli</i>    | Ca_Kabuli_Ch06               | 8633187                        | (A/C)       |
| 9889        | CakSNP9889     | <i>Kabuli</i>    | Ca_Kabuli_Ch06               | 8634513                        | (G/A)       |
| 9890        | CakSNP9890     | <i>Kabuli</i>    | Ca_Kabuli_Ch06               | 8634494                        | (T/C)       |
| 9891        | CakSNP9891     | <i>Kabuli</i>    | Ca_Kabuli_Ch06               | 8643286                        | (T/C)       |
| 9892        | CakSNP9892     | <i>Kabuli</i>    | Ca_Kabuli_Ch06               | 8645079                        | (A/G)       |
| 9893        | CakSNP9893     | <i>Kabuli</i>    | Ca_Kabuli_Ch06               | 8710064                        | (A/T)       |
| 9894        | CakSNP9894     | <i>Kabuli</i>    | Ca_Kabuli_Ch06               | 8787556                        | (C/T)       |
| 9895        | CakSNP9895     | <i>Kabuli</i>    | Ca_Kabuli_Ch06               | 8787557                        | (T/C)       |
| 9896        | CakSNP9896     | <i>Kabuli</i>    | Ca_Kabuli_Ch06               | 8787562                        | (C/T)       |
| 9897        | CakSNP9897     | <i>Kabuli</i>    | Ca_Kabuli_Ch06               | 8787564                        | (G/T)       |
| 9898        | CakSNP9898     | <i>Kabuli</i>    | Ca_Kabuli_Ch06               | 8787568                        | (G/T)       |
| 9899        | CakSNP9899     | <i>Kabuli</i>    | Ca_Kabuli_Ch06               | 8787572                        | (T/A)       |
| 9900        | CakSNP9900     | <i>Kabuli</i>    | Ca_Kabuli_Ch06               | 8787573                        | (G/A)       |
| 9901        | CakSNP9901     | <i>Kabuli</i>    | Ca_Kabuli_Ch06               | 8794430                        | (A/G)       |
| 9902        | CakSNP9902     | <i>Kabuli</i>    | Ca_Kabuli_Ch06               | 8794552                        | (C/G)       |
| 9903        | CakSNP9903     | <i>Kabuli</i>    | Ca_Kabuli_Ch06               | 8890548                        | (A/G)       |
| 9904        | CakSNP9904     | <i>Kabuli</i>    | Ca_Kabuli_Ch06               | 8890552                        | (C/G)       |
| 9905        | CakSNP9905     | <i>Kabuli</i>    | Ca_Kabuli_Ch06               | 8893216                        | (A/G)       |
| 9906        | CakSNP9906     | <i>Kabuli</i>    | Ca_Kabuli_Ch06               | 8968068                        | (G/A)       |
| 9907        | CakSNP9907     | <i>Kabuli</i>    | Ca_Kabuli_Ch06               | 8969711                        | (C/T)       |
| 9908        | CakSNP9908     | <i>Kabuli</i>    | Ca_Kabuli_Ch06               | 8969725                        | (C/A)       |
| 9909        | CakSNP9909     | <i>Kabuli</i>    | Ca_Kabuli_Ch06               | 9053279                        | (A/G)       |
| 9910        | CakSNP9910     | <i>Kabuli</i>    | Ca_Kabuli_Ch06               | 9054596                        | (T/C)       |
| 9911        | CakSNP9911     | <i>Kabuli</i>    | Ca_Kabuli_Ch06               | 9088121                        | (T/C)       |
| 9912        | CakSNP9912     | <i>Kabuli</i>    | Ca_Kabuli_Ch06               | 9088151                        | (G/A)       |
| 9913        | CakSNP9913     | <i>Kabuli</i>    | Ca_Kabuli_Ch06               | 9088163                        | (A/G)       |
| 9914        | CakSNP9914     | <i>Kabuli</i>    | Ca_Kabuli_Ch06               | 9088184                        | (G/A)       |
| 9915        | CakSNP9915     | <i>Kabuli</i>    | Ca_Kabuli_Ch06               | 9088234                        | (A/C)       |
| 9916        | CakSNP9916     | <i>Kabuli</i>    | Ca_Kabuli_Ch06               | 9190620                        | (G/T)       |
| 9917        | CakSNP9917     | <i>Kabuli</i>    | Ca_Kabuli_Ch06               | 9221201                        | (A/G)       |

| <b>S.N.</b> | <b>SNP IDs</b> | <b>Cultivars</b> | <b>Chromosomes/scaffolds</b> | <b>Physical positions (bp)</b> | <b>SNPs</b> |
|-------------|----------------|------------------|------------------------------|--------------------------------|-------------|
| 9918        | CakSNP9918     | <i>Kabuli</i>    | Ca_Kabuli_Chr06              | 9227767                        | (C/A)       |
| 9919        | CakSNP9919     | <i>Kabuli</i>    | Ca_Kabuli_Chr06              | 9228004                        | (C/A)       |
| 9920        | CakSNP9920     | <i>Kabuli</i>    | Ca_Kabuli_Chr06              | 9323775                        | (A/G)       |
| 9921        | CakSNP9921     | <i>Kabuli</i>    | Ca_Kabuli_Chr06              | 9324122                        | (A/C)       |
| 9922        | CakSNP9922     | <i>Kabuli</i>    | Ca_Kabuli_Chr06              | 9373240                        | (C/A)       |
| 9923        | CakSNP9923     | <i>Kabuli</i>    | Ca_Kabuli_Chr06              | 9373383                        | (G/C)       |
| 9924        | CakSNP9924     | <i>Kabuli</i>    | Ca_Kabuli_Chr06              | 9378508                        | (A/T)       |
| 9925        | CakSNP9925     | <i>Kabuli</i>    | Ca_Kabuli_Chr06              | 9378557                        | (G/C)       |
| 9926        | CakSNP9926     | <i>Kabuli</i>    | Ca_Kabuli_Chr06              | 9382091                        | (C/T)       |
| 9927        | CakSNP9927     | <i>Kabuli</i>    | Ca_Kabuli_Chr06              | 9423222                        | (T/C)       |
| 9928        | CakSNP9928     | <i>Kabuli</i>    | Ca_Kabuli_Chr06              | 9424317                        | (T/C)       |
| 9929        | CakSNP9929     | <i>Kabuli</i>    | Ca_Kabuli_Chr06              | 9428522                        | (C/T)       |
| 9930        | CakSNP9930     | <i>Kabuli</i>    | Ca_Kabuli_Chr06              | 9428517                        | (G/A)       |
| 9931        | CakSNP9931     | <i>Kabuli</i>    | Ca_Kabuli_Chr06              | 9523228                        | (T/C)       |
| 9932        | CakSNP9932     | <i>Kabuli</i>    | Ca_Kabuli_Chr06              | 9544233                        | (T/C)       |
| 9933        | CakSNP9933     | <i>Kabuli</i>    | Ca_Kabuli_Chr06              | 9565932                        | (A/G)       |
| 9934        | CakSNP9934     | <i>Kabuli</i>    | Ca_Kabuli_Chr06              | 9568243                        | (A/C)       |
| 9935        | CakSNP9935     | <i>Kabuli</i>    | Ca_Kabuli_Chr06              | 9568247                        | (G/A)       |
| 9936        | CakSNP9936     | <i>Kabuli</i>    | Ca_Kabuli_Chr06              | 9568289                        | (A/C)       |
| 9937        | CakSNP9937     | <i>Kabuli</i>    | Ca_Kabuli_Chr06              | 9569170                        | (A/G)       |
| 9938        | CakSNP9938     | <i>Kabuli</i>    | Ca_Kabuli_Chr06              | 9570753                        | (C/T)       |
| 9939        | CakSNP9939     | <i>Kabuli</i>    | Ca_Kabuli_Chr06              | 9617218                        | (A/G)       |
| 9940        | CakSNP9940     | <i>Kabuli</i>    | Ca_Kabuli_Chr06              | 9617233                        | (A/G)       |
| 9941        | CakSNP9941     | <i>Kabuli</i>    | Ca_Kabuli_Chr06              | 9714240                        | (T/C)       |
| 9942        | CakSNP9942     | <i>Kabuli</i>    | Ca_Kabuli_Chr06              | 9728195                        | (G/T)       |
| 9943        | CakSNP9943     | <i>Kabuli</i>    | Ca_Kabuli_Chr06              | 9728181                        | (A/G)       |
| 9944        | CakSNP9944     | <i>Kabuli</i>    | Ca_Kabuli_Chr06              | 9814378                        | (G/T)       |
| 9945        | CakSNP9945     | <i>Kabuli</i>    | Ca_Kabuli_Chr06              | 9834199                        | (T/C)       |
| 9946        | CakSNP9946     | <i>Kabuli</i>    | Ca_Kabuli_Chr06              | 9834198                        | (C/A)       |
| 9947        | CakSNP9947     | <i>Kabuli</i>    | Ca_Kabuli_Chr06              | 9834187                        | (A/T)       |
| 9948        | CakSNP9948     | <i>Kabuli</i>    | Ca_Kabuli_Chr06              | 9834184                        | (A/T)       |
| 9949        | CakSNP9949     | <i>Kabuli</i>    | Ca_Kabuli_Chr06              | 9834183                        | (C/T)       |
| 9950        | CakSNP9950     | <i>Kabuli</i>    | Ca_Kabuli_Chr06              | 9841836                        | (G/A)       |
| 9951        | CakSNP9951     | <i>Kabuli</i>    | Ca_Kabuli_Chr06              | 9841890                        | (G/A)       |
| 9952        | CakSNP9952     | <i>Kabuli</i>    | Ca_Kabuli_Chr06              | 9845070                        | (C/T)       |
| 9953        | CakSNP9953     | <i>Kabuli</i>    | Ca_Kabuli_Chr06              | 9845076                        | (T/C)       |
| 9954        | CakSNP9954     | <i>Kabuli</i>    | Ca_Kabuli_Chr06              | 9872557                        | (G/A)       |
| 9955        | CakSNP9955     | <i>Kabuli</i>    | Ca_Kabuli_Chr06              | 9872657                        | (C/T)       |



| <b>S.N.</b> | <b>SNP IDs</b> | <b>Cultivars</b> | <b>Chromosomes/scaffolds</b> | <b>Physical positions (bp)</b> | <b>SNPs</b> |
|-------------|----------------|------------------|------------------------------|--------------------------------|-------------|
| 9956        | CakSNP9956     | <i>Kabuli</i>    | Ca_Kabuli_Chr06              | 9872988                        | (A/T)       |
| 9957        | CakSNP9957     | <i>Kabuli</i>    | Ca_Kabuli_Chr06              | 9888237                        | (G/A)       |
| 9958        | CakSNP9958     | <i>Kabuli</i>    | Ca_Kabuli_Chr06              | 9938833                        | (T/C)       |
| 9959        | CakSNP9959     | <i>Kabuli</i>    | Ca_Kabuli_Chr06              | 9939017                        | (G/A)       |
| 9960        | CakSNP9960     | <i>Kabuli</i>    | Ca_Kabuli_Chr06              | 9959686                        | (T/C)       |
| 9961        | CakSNP9961     | <i>Kabuli</i>    | Ca_Kabuli_Chr06              | 10020177                       | (C/G)       |
| 9962        | CakSNP9962     | <i>Kabuli</i>    | Ca_Kabuli_Chr06              | 10020187                       | (A/G)       |
| 9963        | CakSNP9963     | <i>Kabuli</i>    | Ca_Kabuli_Chr06              | 10025115                       | (A/C)       |
| 9964        | CakSNP9964     | <i>Kabuli</i>    | Ca_Kabuli_Chr06              | 10025113                       | (C/G)       |
| 9965        | CakSNP9965     | <i>Kabuli</i>    | Ca_Kabuli_Chr06              | 10027019                       | (G/A)       |
| 9966        | CakSNP9966     | <i>Kabuli</i>    | Ca_Kabuli_Chr06              | 10027015                       | (G/C)       |
| 9967        | CakSNP9967     | <i>Kabuli</i>    | Ca_Kabuli_Chr06              | 10028504                       | (A/G)       |
| 9968        | CakSNP9968     | <i>Kabuli</i>    | Ca_Kabuli_Chr06              | 10028508                       | (G/C)       |
| 9969        | CakSNP9969     | <i>Kabuli</i>    | Ca_Kabuli_Chr06              | 10028515                       | (A/G)       |
| 9970        | CakSNP9970     | <i>Kabuli</i>    | Ca_Kabuli_Chr06              | 10045644                       | (A/C)       |
| 9971        | CakSNP9971     | <i>Kabuli</i>    | Ca_Kabuli_Chr06              | 10045844                       | (A/G)       |
| 9972        | CakSNP9972     | <i>Kabuli</i>    | Ca_Kabuli_Chr06              | 10088963                       | (G/T)       |
| 9973        | CakSNP9973     | <i>Kabuli</i>    | Ca_Kabuli_Chr06              | 10088984                       | (A/G)       |
| 9974        | CakSNP9974     | <i>Kabuli</i>    | Ca_Kabuli_Chr06              | 10100863                       | (C/G)       |
| 9975        | CakSNP9975     | <i>Kabuli</i>    | Ca_Kabuli_Chr06              | 10111488                       | (C/G)       |
| 9976        | CakSNP9976     | <i>Kabuli</i>    | Ca_Kabuli_Chr06              | 10111520                       | (G/C)       |
| 9977        | CakSNP9977     | <i>Kabuli</i>    | Ca_Kabuli_Chr06              | 10111870                       | (A/G)       |
| 9978        | CakSNP9978     | <i>Kabuli</i>    | Ca_Kabuli_Chr06              | 10111938                       | (G/T)       |
| 9979        | CakSNP9979     | <i>Kabuli</i>    | Ca_Kabuli_Chr06              | 10116403                       | (A/T)       |
| 9980        | CakSNP9980     | <i>Kabuli</i>    | Ca_Kabuli_Chr06              | 10116475                       | (C/A)       |
| 9981        | CakSNP9981     | <i>Kabuli</i>    | Ca_Kabuli_Chr06              | 10138984                       | (C/T)       |
| 9982        | CakSNP9982     | <i>Kabuli</i>    | Ca_Kabuli_Chr06              | 10151973                       | (A/G)       |
| 9983        | CakSNP9983     | <i>Kabuli</i>    | Ca_Kabuli_Chr06              | 10151974                       | (A/G)       |
| 9984        | CakSNP9984     | <i>Kabuli</i>    | Ca_Kabuli_Chr06              | 10158850                       | (T/C)       |
| 9985        | CakSNP9985     | <i>Kabuli</i>    | Ca_Kabuli_Chr06              | 10188400                       | (G/T)       |
| 9986        | CakSNP9986     | <i>Kabuli</i>    | Ca_Kabuli_Chr06              | 10191941                       | (A/G)       |
| 9987        | CakSNP9987     | <i>Kabuli</i>    | Ca_Kabuli_Chr06              | 10215262                       | (T/G)       |
| 9988        | CakSNP9988     | <i>Kabuli</i>    | Ca_Kabuli_Chr06              | 10230617                       | (A/G)       |
| 9989        | CakSNP9989     | <i>Kabuli</i>    | Ca_Kabuli_Chr06              | 10230657                       | (A/G)       |
| 9990        | CakSNP9990     | <i>Kabuli</i>    | Ca_Kabuli_Chr06              | 10231092                       | (T/G)       |
| 9991        | CakSNP9991     | <i>Kabuli</i>    | Ca_Kabuli_Chr06              | 10231095                       | (G/T)       |
| 9992        | CakSNP9992     | <i>Kabuli</i>    | Ca_Kabuli_Chr06              | 10234241                       | (A/G)       |
| 9993        | CakSNP9993     | <i>Kabuli</i>    | Ca_Kabuli_Chr06              | 10259614                       | (C/T)       |

| <b>S.N.</b> | <b>SNP IDs</b> | <b>Cultivars</b> | <b>Chromosomes/scaffolds</b> | <b>Physical positions (bp)</b> | <b>SNPs</b> |
|-------------|----------------|------------------|------------------------------|--------------------------------|-------------|
| 9994        | CakSNP9994     | <i>Kabuli</i>    | Ca_Kabuli_Chr06              | 10260274                       | (C/T)       |
| 9995        | CakSNP9995     | <i>Kabuli</i>    | Ca_Kabuli_Chr06              | 10314993                       | (C/G)       |
| 9996        | CakSNP9996     | <i>Kabuli</i>    | Ca_Kabuli_Chr06              | 10395411                       | (G/A)       |
| 9997        | CakSNP9997     | <i>Kabuli</i>    | Ca_Kabuli_Chr06              | 10395379                       | (T/C)       |
| 9998        | CakSNP9998     | <i>Kabuli</i>    | Ca_Kabuli_Chr06              | 10395356                       | (T/A)       |
| 9999        | CakSNP9999     | <i>Kabuli</i>    | Ca_Kabuli_Chr06              | 10441736                       | (A/C)       |
| 10000       | CakSNP10000    | <i>Kabuli</i>    | Ca_Kabuli_Chr06              | 10441705                       | (T/C)       |
| 10001       | CakSNP10001    | <i>Kabuli</i>    | Ca_Kabuli_Chr06              | 10442148                       | (A/C)       |
| 10002       | CakSNP10002    | <i>Kabuli</i>    | Ca_Kabuli_Chr06              | 10445185                       | (C/T)       |
| 10003       | CakSNP10003    | <i>Kabuli</i>    | Ca_Kabuli_Chr06              | 10445274                       | (G/A)       |
| 10004       | CakSNP10004    | <i>Kabuli</i>    | Ca_Kabuli_Chr06              | 10456774                       | (A/G)       |
| 10005       | CakSNP10005    | <i>Kabuli</i>    | Ca_Kabuli_Chr06              | 10456854                       | (G/T)       |
| 10006       | CakSNP10006    | <i>Kabuli</i>    | Ca_Kabuli_Chr06              | 10494134                       | (C/T)       |
| 10007       | CakSNP10007    | <i>Kabuli</i>    | Ca_Kabuli_Chr06              | 10494057                       | (C/A)       |
| 10008       | CakSNP10008    | <i>Kabuli</i>    | Ca_Kabuli_Chr06              | 10494055                       | (T/A)       |
| 10009       | CakSNP10009    | <i>Kabuli</i>    | Ca_Kabuli_Chr06              | 10495747                       | (G/T)       |
| 10010       | CakSNP10010    | <i>Kabuli</i>    | Ca_Kabuli_Chr06              | 10495804                       | (C/T)       |
| 10011       | CakSNP10011    | <i>Kabuli</i>    | Ca_Kabuli_Chr06              | 10502381                       | (A/G)       |
| 10012       | CakSNP10012    | <i>Kabuli</i>    | Ca_Kabuli_Chr06              | 10502387                       | (C/A)       |
| 10013       | CakSNP10013    | <i>Kabuli</i>    | Ca_Kabuli_Chr06              | 10510996                       | (T/C)       |
| 10014       | CakSNP10014    | <i>Kabuli</i>    | Ca_Kabuli_Chr06              | 10520958                       | (C/T)       |
| 10015       | CakSNP10015    | <i>Kabuli</i>    | Ca_Kabuli_Chr06              | 10521741                       | (A/T)       |
| 10016       | CakSNP10016    | <i>Kabuli</i>    | Ca_Kabuli_Chr06              | 10531311                       | (A/G)       |
| 10017       | CakSNP10017    | <i>Kabuli</i>    | Ca_Kabuli_Chr06              | 10531399                       | (C/T)       |
| 10018       | CakSNP10018    | <i>Kabuli</i>    | Ca_Kabuli_Chr06              | 10532182                       | (A/T)       |
| 10019       | CakSNP10019    | <i>Kabuli</i>    | Ca_Kabuli_Chr06              | 10532739                       | (A/G)       |
| 10020       | CakSNP10020    | <i>Kabuli</i>    | Ca_Kabuli_Chr06              | 10539918                       | (A/C)       |
| 10021       | CakSNP10021    | <i>Kabuli</i>    | Ca_Kabuli_Chr06              | 10539977                       | (C/T)       |
| 10022       | CakSNP10022    | <i>Kabuli</i>    | Ca_Kabuli_Chr06              | 10539994                       | (A/C)       |
| 10023       | CakSNP10023    | <i>Kabuli</i>    | Ca_Kabuli_Chr06              | 10567518                       | (A/G)       |
| 10024       | CakSNP10024    | <i>Kabuli</i>    | Ca_Kabuli_Chr06              | 10588030                       | (C/T)       |
| 10025       | CakSNP10025    | <i>Kabuli</i>    | Ca_Kabuli_Chr06              | 10613546                       | (A/G)       |
| 10026       | CakSNP10026    | <i>Kabuli</i>    | Ca_Kabuli_Chr06              | 10613612                       | (A/G)       |
| 10027       | CakSNP10027    | <i>Kabuli</i>    | Ca_Kabuli_Chr06              | 10652739                       | (C/T)       |
| 10028       | CakSNP10028    | <i>Kabuli</i>    | Ca_Kabuli_Chr06              | 10667504                       | (A/T)       |
| 10029       | CakSNP10029    | <i>Kabuli</i>    | Ca_Kabuli_Chr06              | 10667559                       | (T/C)       |
| 10030       | CakSNP10030    | <i>Kabuli</i>    | Ca_Kabuli_Chr06              | 10667640                       | (T/G)       |
| 10031       | CakSNP10031    | <i>Kabuli</i>    | Ca_Kabuli_Chr06              | 10670343                       | (G/A)       |

| <b>S.N.</b> | <b>SNP IDs</b> | <b>Cultivars</b> | <b>Chromosomes/scaffolds</b> | <b>Physical positions (bp)</b> | <b>SNPs</b> |
|-------------|----------------|------------------|------------------------------|--------------------------------|-------------|
| 10032       | CakSNP10032    | <i>Kabuli</i>    | Ca_Kabuli_Chr06              | 10670368                       | (G/A)       |
| 10033       | CakSNP10033    | <i>Kabuli</i>    | Ca_Kabuli_Chr06              | 10670409                       | (G/A)       |
| 10034       | CakSNP10034    | <i>Kabuli</i>    | Ca_Kabuli_Chr06              | 10670412                       | (A/C)       |
| 10035       | CakSNP10035    | <i>Kabuli</i>    | Ca_Kabuli_Chr06              | 10670482                       | (C/T)       |
| 10036       | CakSNP10036    | <i>Kabuli</i>    | Ca_Kabuli_Chr06              | 10670582                       | (G/A)       |
| 10037       | CakSNP10037    | <i>Kabuli</i>    | Ca_Kabuli_Chr06              | 10670675                       | (C/T)       |
| 10038       | CakSNP10038    | <i>Kabuli</i>    | Ca_Kabuli_Chr06              | 10670694                       | (G/A)       |
| 10039       | CakSNP10039    | <i>Kabuli</i>    | Ca_Kabuli_Chr06              | 10670773                       | (A/C)       |
| 10040       | CakSNP10040    | <i>Kabuli</i>    | Ca_Kabuli_Chr06              | 10670959                       | (T/C)       |
| 10041       | CakSNP10041    | <i>Kabuli</i>    | Ca_Kabuli_Chr06              | 10671458                       | (T/C)       |
| 10042       | CakSNP10042    | <i>Kabuli</i>    | Ca_Kabuli_Chr06              | 10671444                       | (A/C)       |
| 10043       | CakSNP10043    | <i>Kabuli</i>    | Ca_Kabuli_Chr06              | 10672468                       | (C/T)       |
| 10044       | CakSNP10044    | <i>Kabuli</i>    | Ca_Kabuli_Chr06              | 10677469                       | (A/G)       |
| 10045       | CakSNP10045    | <i>Kabuli</i>    | Ca_Kabuli_Chr06              | 10677501                       | (C/T)       |
| 10046       | CakSNP10046    | <i>Kabuli</i>    | Ca_Kabuli_Chr06              | 10682221                       | (G/T)       |
| 10047       | CakSNP10047    | <i>Kabuli</i>    | Ca_Kabuli_Chr06              | 10682201                       | (C/G)       |
| 10048       | CakSNP10048    | <i>Kabuli</i>    | Ca_Kabuli_Chr06              | 10683193                       | (C/T)       |
| 10049       | CakSNP10049    | <i>Kabuli</i>    | Ca_Kabuli_Chr06              | 10696986                       | (A/T)       |
| 10050       | CakSNP10050    | <i>Kabuli</i>    | Ca_Kabuli_Chr06              | 10696990                       | (T/C)       |
| 10051       | CakSNP10051    | <i>Kabuli</i>    | Ca_Kabuli_Chr06              | 10697064                       | (T/A)       |
| 10052       | CakSNP10052    | <i>Kabuli</i>    | Ca_Kabuli_Chr06              | 10716986                       | (G/A)       |
| 10053       | CakSNP10053    | <i>Kabuli</i>    | Ca_Kabuli_Chr06              | 10716968                       | (G/A)       |
| 10054       | CakSNP10054    | <i>Kabuli</i>    | Ca_Kabuli_Chr06              | 10744029                       | (C/A)       |
| 10055       | CakSNP10055    | <i>Kabuli</i>    | Ca_Kabuli_Chr06              | 10743996                       | (A/T)       |
| 10056       | CakSNP10056    | <i>Kabuli</i>    | Ca_Kabuli_Chr06              | 10748965                       | (G/T)       |
| 10057       | CakSNP10057    | <i>Kabuli</i>    | Ca_Kabuli_Chr06              | 10779368                       | (G/C)       |
| 10058       | CakSNP10058    | <i>Kabuli</i>    | Ca_Kabuli_Chr06              | 10779465                       | (A/T)       |
| 10059       | CakSNP10059    | <i>Kabuli</i>    | Ca_Kabuli_Chr06              | 10779547                       | (T/G)       |
| 10060       | CakSNP10060    | <i>Kabuli</i>    | Ca_Kabuli_Chr06              | 10779636                       | (C/A)       |
| 10061       | CakSNP10061    | <i>Kabuli</i>    | Ca_Kabuli_Chr06              | 10785480                       | (T/G)       |
| 10062       | CakSNP10062    | <i>Kabuli</i>    | Ca_Kabuli_Chr06              | 10870187                       | (T/G)       |
| 10063       | CakSNP10063    | <i>Kabuli</i>    | Ca_Kabuli_Chr06              | 10870534                       | (A/G)       |
| 10064       | CakSNP10064    | <i>Kabuli</i>    | Ca_Kabuli_Chr06              | 10880791                       | (C/T)       |
| 10065       | CakSNP10065    | <i>Kabuli</i>    | Ca_Kabuli_Chr06              | 10880819                       | (T/G)       |
| 10066       | CakSNP10066    | <i>Kabuli</i>    | Ca_Kabuli_Chr06              | 10881002                       | (A/G)       |
| 10067       | CakSNP10067    | <i>Kabuli</i>    | Ca_Kabuli_Chr06              | 10880985                       | (C/T)       |
| 10068       | CakSNP10068    | <i>Kabuli</i>    | Ca_Kabuli_Chr06              | 10880962                       | (G/T)       |
| 10069       | CakSNP10069    | <i>Kabuli</i>    | Ca_Kabuli_Chr06              | 10991652                       | (C/A)       |

| <b>S.N.</b> | <b>SNP IDs</b> | <b>Cultivars</b> | <b>Chromosomes/scaffolds</b> | <b>Physical positions (bp)</b> | <b>SNPs</b> |
|-------------|----------------|------------------|------------------------------|--------------------------------|-------------|
| 10070       | CakSNP10070    | <i>Kabuli</i>    | Ca_Kabuli_Chr06              | 10991717                       | (T/A)       |
| 10071       | CakSNP10071    | <i>Kabuli</i>    | Ca_Kabuli_Chr06              | 10991737                       | (A/C)       |
| 10072       | CakSNP10072    | <i>Kabuli</i>    | Ca_Kabuli_Chr06              | 11011847                       | (C/G)       |
| 10073       | CakSNP10073    | <i>Kabuli</i>    | Ca_Kabuli_Chr06              | 11128158                       | (A/G)       |
| 10074       | CakSNP10074    | <i>Kabuli</i>    | Ca_Kabuli_Chr06              | 11128170                       | (T/C)       |
| 10075       | CakSNP10075    | <i>Kabuli</i>    | Ca_Kabuli_Chr06              | 11128204                       | (G/A)       |
| 10076       | CakSNP10076    | <i>Kabuli</i>    | Ca_Kabuli_Chr06              | 11131010                       | (T/A)       |
| 10077       | CakSNP10077    | <i>Kabuli</i>    | Ca_Kabuli_Chr06              | 11131464                       | (G/A)       |
| 10078       | CakSNP10078    | <i>Kabuli</i>    | Ca_Kabuli_Chr06              | 11131462                       | (G/A)       |
| 10079       | CakSNP10079    | <i>Kabuli</i>    | Ca_Kabuli_Chr06              | 11131436                       | (T/G)       |
| 10080       | CakSNP10080    | <i>Kabuli</i>    | Ca_Kabuli_Chr06              | 11163819                       | (T/G)       |
| 10081       | CakSNP10081    | <i>Kabuli</i>    | Ca_Kabuli_Chr06              | 11163822                       | (C/T)       |
| 10082       | CakSNP10082    | <i>Kabuli</i>    | Ca_Kabuli_Chr06              | 11163836                       | (C/T)       |
| 10083       | CakSNP10083    | <i>Kabuli</i>    | Ca_Kabuli_Chr06              | 11188803                       | (G/A)       |
| 10084       | CakSNP10084    | <i>Kabuli</i>    | Ca_Kabuli_Chr06              | 11189051                       | (A/G)       |
| 10085       | CakSNP10085    | <i>Kabuli</i>    | Ca_Kabuli_Chr06              | 11229102                       | (C/T)       |
| 10086       | CakSNP10086    | <i>Kabuli</i>    | Ca_Kabuli_Chr06              | 11229143                       | (A/C)       |
| 10087       | CakSNP10087    | <i>Kabuli</i>    | Ca_Kabuli_Chr06              | 11229302                       | (A/G)       |
| 10088       | CakSNP10088    | <i>Kabuli</i>    | Ca_Kabuli_Chr06              | 11229388                       | (C/T)       |
| 10089       | CakSNP10089    | <i>Kabuli</i>    | Ca_Kabuli_Chr06              | 11285884                       | (G/A)       |
| 10090       | CakSNP10090    | <i>Kabuli</i>    | Ca_Kabuli_Chr06              | 11300597                       | (C/T)       |
| 10091       | CakSNP10091    | <i>Kabuli</i>    | Ca_Kabuli_Chr06              | 11300549                       | (A/C)       |
| 10092       | CakSNP10092    | <i>Kabuli</i>    | Ca_Kabuli_Chr06              | 11302037                       | (A/C)       |
| 10093       | CakSNP10093    | <i>Kabuli</i>    | Ca_Kabuli_Chr06              | 11302033                       | (T/C)       |
| 10094       | CakSNP10094    | <i>Kabuli</i>    | Ca_Kabuli_Chr06              | 11314581                       | (T/C)       |
| 10095       | CakSNP10095    | <i>Kabuli</i>    | Ca_Kabuli_Chr06              | 11394963                       | (A/G)       |
| 10096       | CakSNP10096    | <i>Kabuli</i>    | Ca_Kabuli_Chr06              | 11395330                       | (C/T)       |
| 10097       | CakSNP10097    | <i>Kabuli</i>    | Ca_Kabuli_Chr06              | 11508828                       | (C/T)       |
| 10098       | CakSNP10098    | <i>Kabuli</i>    | Ca_Kabuli_Chr06              | 11508824                       | (T/G)       |
| 10099       | CakSNP10099    | <i>Kabuli</i>    | Ca_Kabuli_Chr06              | 11508817                       | (G/A)       |
| 10100       | CakSNP10100    | <i>Kabuli</i>    | Ca_Kabuli_Chr06              | 11508816                       | (A/C)       |
| 10101       | CakSNP10101    | <i>Kabuli</i>    | Ca_Kabuli_Chr06              | 11514926                       | (T/C)       |
| 10102       | CakSNP10102    | <i>Kabuli</i>    | Ca_Kabuli_Chr06              | 11514883                       | (C/T)       |
| 10103       | CakSNP10103    | <i>Kabuli</i>    | Ca_Kabuli_Chr06              | 11514935                       | (G/A)       |
| 10104       | CakSNP10104    | <i>Kabuli</i>    | Ca_Kabuli_Chr06              | 11543615                       | (G/C)       |
| 10105       | CakSNP10105    | <i>Kabuli</i>    | Ca_Kabuli_Chr06              | 11543618                       | (T/G)       |
| 10106       | CakSNP10106    | <i>Kabuli</i>    | Ca_Kabuli_Chr06              | 11665233                       | (G/A)       |
| 10107       | CakSNP10107    | <i>Kabuli</i>    | Ca_Kabuli_Chr06              | 11665338                       | (T/G)       |

| <b>S.N.</b> | <b>SNP IDs</b> | <b>Cultivars</b> | <b>Chromosomes/scaffolds</b> | <b>Physical positions (bp)</b> | <b>SNPs</b> |
|-------------|----------------|------------------|------------------------------|--------------------------------|-------------|
| 10108       | CakSNP10108    | <i>Kabuli</i>    | Ca_Kabuli_Chr06              | 12408955                       | (A/G)       |
| 10109       | CakSNP10109    | <i>Kabuli</i>    | Ca_Kabuli_Chr06              | 12408964                       | (G/C)       |
| 10110       | CakSNP10110    | <i>Kabuli</i>    | Ca_Kabuli_Chr06              | 12434183                       | (G/T)       |
| 10111       | CakSNP10111    | <i>Kabuli</i>    | Ca_Kabuli_Chr06              | 12437275                       | (A/T)       |
| 10112       | CakSNP10112    | <i>Kabuli</i>    | Ca_Kabuli_Chr06              | 12437285                       | (A/G)       |
| 10113       | CakSNP10113    | <i>Kabuli</i>    | Ca_Kabuli_Chr06              | 12437288                       | (G/A)       |
| 10114       | CakSNP10114    | <i>Kabuli</i>    | Ca_Kabuli_Chr06              | 12437319                       | (C/T)       |
| 10115       | CakSNP10115    | <i>Kabuli</i>    | Ca_Kabuli_Chr06              | 12494824                       | (G/T)       |
| 10116       | CakSNP10116    | <i>Kabuli</i>    | Ca_Kabuli_Chr06              | 12494972                       | (A/G)       |
| 10117       | CakSNP10117    | <i>Kabuli</i>    | Ca_Kabuli_Chr06              | 12532947                       | (T/A)       |
| 10118       | CakSNP10118    | <i>Kabuli</i>    | Ca_Kabuli_Chr06              | 12535733                       | (C/G)       |
| 10119       | CakSNP10119    | <i>Kabuli</i>    | Ca_Kabuli_Chr06              | 12619757                       | (C/T)       |
| 10120       | CakSNP10120    | <i>Kabuli</i>    | Ca_Kabuli_Chr06              | 12619786                       | (C/A)       |
| 10121       | CakSNP10121    | <i>Kabuli</i>    | Ca_Kabuli_Chr06              | 12619829                       | (A/T)       |
| 10122       | CakSNP10122    | <i>Kabuli</i>    | Ca_Kabuli_Chr06              | 12647539                       | (G/A)       |
| 10123       | CakSNP10123    | <i>Kabuli</i>    | Ca_Kabuli_Chr06              | 12799890                       | (T/G)       |
| 10124       | CakSNP10124    | <i>Kabuli</i>    | Ca_Kabuli_Chr06              | 12844524                       | (G/A)       |
| 10125       | CakSNP10125    | <i>Kabuli</i>    | Ca_Kabuli_Chr06              | 12893335                       | (C/A)       |
| 10126       | CakSNP10126    | <i>Kabuli</i>    | Ca_Kabuli_Chr06              | 12893424                       | (C/T)       |
| 10127       | CakSNP10127    | <i>Kabuli</i>    | Ca_Kabuli_Chr06              | 12906599                       | (G/A)       |
| 10128       | CakSNP10128    | <i>Kabuli</i>    | Ca_Kabuli_Chr06              | 12906680                       | (T/C)       |
| 10129       | CakSNP10129    | <i>Kabuli</i>    | Ca_Kabuli_Chr06              | 12906669                       | (G/A)       |
| 10130       | CakSNP10130    | <i>Kabuli</i>    | Ca_Kabuli_Chr06              | 12973765                       | (A/G)       |
| 10131       | CakSNP10131    | <i>Kabuli</i>    | Ca_Kabuli_Chr06              | 12976279                       | (T/A)       |
| 10132       | CakSNP10132    | <i>Kabuli</i>    | Ca_Kabuli_Chr06              | 12977129                       | (A/G)       |
| 10133       | CakSNP10133    | <i>Kabuli</i>    | Ca_Kabuli_Chr06              | 12977196                       | (A/G)       |
| 10134       | CakSNP10134    | <i>Kabuli</i>    | Ca_Kabuli_Chr06              | 12977204                       | (T/G)       |
| 10135       | CakSNP10135    | <i>Kabuli</i>    | Ca_Kabuli_Chr06              | 12985896                       | (A/C)       |
| 10136       | CakSNP10136    | <i>Kabuli</i>    | Ca_Kabuli_Chr06              | 12985908                       | (C/G)       |
| 10137       | CakSNP10137    | <i>Kabuli</i>    | Ca_Kabuli_Chr06              | 12985910                       | (C/T)       |
| 10138       | CakSNP10138    | <i>Kabuli</i>    | Ca_Kabuli_Chr06              | 12986776                       | (A/G)       |
| 10139       | CakSNP10139    | <i>Kabuli</i>    | Ca_Kabuli_Chr06              | 12986833                       | (A/C)       |
| 10140       | CakSNP10140    | <i>Kabuli</i>    | Ca_Kabuli_Chr06              | 13008333                       | (A/T)       |
| 10141       | CakSNP10141    | <i>Kabuli</i>    | Ca_Kabuli_Chr06              | 13008360                       | (C/T)       |
| 10142       | CakSNP10142    | <i>Kabuli</i>    | Ca_Kabuli_Chr06              | 13008465                       | (C/T)       |
| 10143       | CakSNP10143    | <i>Kabuli</i>    | Ca_Kabuli_Chr06              | 13099658                       | (G/T)       |
| 10144       | CakSNP10144    | <i>Kabuli</i>    | Ca_Kabuli_Chr06              | 13099656                       | (G/T)       |
| 10145       | CakSNP10145    | <i>Kabuli</i>    | Ca_Kabuli_Chr06              | 13107887                       | (C/T)       |

| <b>S.N.</b> | <b>SNP IDs</b> | <b>Cultivars</b> | <b>Chromosomes/scaffolds</b> | <b>Physical positions (bp)</b> | <b>SNPs</b> |
|-------------|----------------|------------------|------------------------------|--------------------------------|-------------|
| 10146       | CakSNP10146    | <i>Kabuli</i>    | Ca_Kabuli_Chr06              | 13117820                       | (A/T)       |
| 10147       | CakSNP10147    | <i>Kabuli</i>    | Ca_Kabuli_Chr06              | 13131682                       | (C/G)       |
| 10148       | CakSNP10148    | <i>Kabuli</i>    | Ca_Kabuli_Chr06              | 13136852                       | (C/T)       |
| 10149       | CakSNP10149    | <i>Kabuli</i>    | Ca_Kabuli_Chr06              | 13136835                       | (C/T)       |
| 10150       | CakSNP10150    | <i>Kabuli</i>    | Ca_Kabuli_Chr06              | 13136976                       | (A/G)       |
| 10151       | CakSNP10151    | <i>Kabuli</i>    | Ca_Kabuli_Chr06              | 13136955                       | (G/A)       |
| 10152       | CakSNP10152    | <i>Kabuli</i>    | Ca_Kabuli_Chr06              | 13187706                       | (A/G)       |
| 10153       | CakSNP10153    | <i>Kabuli</i>    | Ca_Kabuli_Chr06              | 13187709                       | (T/C)       |
| 10154       | CakSNP10154    | <i>Kabuli</i>    | Ca_Kabuli_Chr06              | 13188124                       | (G/C)       |
| 10155       | CakSNP10155    | <i>Kabuli</i>    | Ca_Kabuli_Chr06              | 13188119                       | (A/C)       |
| 10156       | CakSNP10156    | <i>Kabuli</i>    | Ca_Kabuli_Chr06              | 13188480                       | (T/C)       |
| 10157       | CakSNP10157    | <i>Kabuli</i>    | Ca_Kabuli_Chr06              | 13192177                       | (G/A)       |
| 10158       | CakSNP10158    | <i>Kabuli</i>    | Ca_Kabuli_Chr06              | 13243282                       | (A/G)       |
| 10159       | CakSNP10159    | <i>Kabuli</i>    | Ca_Kabuli_Chr06              | 13252152                       | (C/T)       |
| 10160       | CakSNP10160    | <i>Kabuli</i>    | Ca_Kabuli_Chr06              | 13296128                       | (G/A)       |
| 10161       | CakSNP10161    | <i>Kabuli</i>    | Ca_Kabuli_Chr06              | 13326969                       | (C/G)       |
| 10162       | CakSNP10162    | <i>Kabuli</i>    | Ca_Kabuli_Chr06              | 13340012                       | (A/G)       |
| 10163       | CakSNP10163    | <i>Kabuli</i>    | Ca_Kabuli_Chr06              | 13340757                       | (T/C)       |
| 10164       | CakSNP10164    | <i>Kabuli</i>    | Ca_Kabuli_Chr06              | 13340762                       | (G/A)       |
| 10165       | CakSNP10165    | <i>Kabuli</i>    | Ca_Kabuli_Chr06              | 13340782                       | (G/A)       |
| 10166       | CakSNP10166    | <i>Kabuli</i>    | Ca_Kabuli_Chr06              | 13413848                       | (C/G)       |
| 10167       | CakSNP10167    | <i>Kabuli</i>    | Ca_Kabuli_Chr06              | 13483841                       | (T/G)       |
| 10168       | CakSNP10168    | <i>Kabuli</i>    | Ca_Kabuli_Chr06              | 13565854                       | (T/C)       |
| 10169       | CakSNP10169    | <i>Kabuli</i>    | Ca_Kabuli_Chr06              | 13565990                       | (C/T)       |
| 10170       | CakSNP10170    | <i>Kabuli</i>    | Ca_Kabuli_Chr06              | 13566007                       | (C/T)       |
| 10171       | CakSNP10171    | <i>Kabuli</i>    | Ca_Kabuli_Chr06              | 13566012                       | (T/G)       |
| 10172       | CakSNP10172    | <i>Kabuli</i>    | Ca_Kabuli_Chr06              | 13566041                       | (C/T)       |
| 10173       | CakSNP10173    | <i>Kabuli</i>    | Ca_Kabuli_Chr06              | 13566110                       | (A/G)       |
| 10174       | CakSNP10174    | <i>Kabuli</i>    | Ca_Kabuli_Chr06              | 13566136                       | (A/C)       |
| 10175       | CakSNP10175    | <i>Kabuli</i>    | Ca_Kabuli_Chr06              | 13566130                       | (G/T)       |
| 10176       | CakSNP10176    | <i>Kabuli</i>    | Ca_Kabuli_Chr06              | 13572236                       | (A/T)       |
| 10177       | CakSNP10177    | <i>Kabuli</i>    | Ca_Kabuli_Chr06              | 13572221                       | (A/C)       |
| 10178       | CakSNP10178    | <i>Kabuli</i>    | Ca_Kabuli_Chr06              | 13576963                       | (T/A)       |
| 10179       | CakSNP10179    | <i>Kabuli</i>    | Ca_Kabuli_Chr06              | 13591590                       | (T/G)       |
| 10180       | CakSNP10180    | <i>Kabuli</i>    | Ca_Kabuli_Chr06              | 13593544                       | (A/G)       |
| 10181       | CakSNP10181    | <i>Kabuli</i>    | Ca_Kabuli_Chr06              | 13593564                       | (C/A)       |
| 10182       | CakSNP10182    | <i>Kabuli</i>    | Ca_Kabuli_Chr06              | 13593600                       | (T/C)       |
| 10183       | CakSNP10183    | <i>Kabuli</i>    | Ca_Kabuli_Chr06              | 13593685                       | (G/A)       |

| <b>S.N.</b> | <b>SNP IDs</b> | <b>Cultivars</b> | <b>Chromosomes/scaffolds</b> | <b>Physical positions (bp)</b> | <b>SNPs</b> |
|-------------|----------------|------------------|------------------------------|--------------------------------|-------------|
| 10184       | CakSNP10184    | <i>Kabuli</i>    | Ca_Kabuli_Chr06              | 13593668                       | (A/G)       |
| 10185       | CakSNP10185    | <i>Kabuli</i>    | Ca_Kabuli_Chr06              | 13593661                       | (T/C)       |
| 10186       | CakSNP10186    | <i>Kabuli</i>    | Ca_Kabuli_Chr06              | 13593654                       | (T/C)       |
| 10187       | CakSNP10187    | <i>Kabuli</i>    | Ca_Kabuli_Chr06              | 13619538                       | (C/T)       |
| 10188       | CakSNP10188    | <i>Kabuli</i>    | Ca_Kabuli_Chr06              | 13619555                       | (C/T)       |
| 10189       | CakSNP10189    | <i>Kabuli</i>    | Ca_Kabuli_Chr06              | 13619560                       | (T/G)       |
| 10190       | CakSNP10190    | <i>Kabuli</i>    | Ca_Kabuli_Chr06              | 13619589                       | (C/T)       |
| 10191       | CakSNP10191    | <i>Kabuli</i>    | Ca_Kabuli_Chr06              | 13619658                       | (A/G)       |
| 10192       | CakSNP10192    | <i>Kabuli</i>    | Ca_Kabuli_Chr06              | 13619684                       | (A/C)       |
| 10193       | CakSNP10193    | <i>Kabuli</i>    | Ca_Kabuli_Chr06              | 13622292                       | (C/T)       |
| 10194       | CakSNP10194    | <i>Kabuli</i>    | Ca_Kabuli_Chr06              | 13625388                       | (A/G)       |
| 10195       | CakSNP10195    | <i>Kabuli</i>    | Ca_Kabuli_Chr06              | 13637387                       | (T/G)       |
| 10196       | CakSNP10196    | <i>Kabuli</i>    | Ca_Kabuli_Chr06              | 13637347                       | (C/T)       |
| 10197       | CakSNP10197    | <i>Kabuli</i>    | Ca_Kabuli_Chr06              | 13668916                       | (T/A)       |
| 10198       | CakSNP10198    | <i>Kabuli</i>    | Ca_Kabuli_Chr06              | 13668995                       | (A/G)       |
| 10199       | CakSNP10199    | <i>Kabuli</i>    | Ca_Kabuli_Chr06              | 13669052                       | (G/C)       |
| 10200       | CakSNP10200    | <i>Kabuli</i>    | Ca_Kabuli_Chr06              | 13669049                       | (C/T)       |
| 10201       | CakSNP10201    | <i>Kabuli</i>    | Ca_Kabuli_Chr06              | 13669048                       | (T/A)       |
| 10202       | CakSNP10202    | <i>Kabuli</i>    | Ca_Kabuli_Chr06              | 13669042                       | (A/G)       |
| 10203       | CakSNP10203    | <i>Kabuli</i>    | Ca_Kabuli_Chr06              | 13669018                       | (G/A)       |
| 10204       | CakSNP10204    | <i>Kabuli</i>    | Ca_Kabuli_Chr06              | 13669006                       | (G/C)       |
| 10205       | CakSNP10205    | <i>Kabuli</i>    | Ca_Kabuli_Chr06              | 13714897                       | (A/T)       |
| 10206       | CakSNP10206    | <i>Kabuli</i>    | Ca_Kabuli_Chr06              | 13764980                       | (T/A)       |
| 10207       | CakSNP10207    | <i>Kabuli</i>    | Ca_Kabuli_Chr06              | 13827484                       | (C/T)       |
| 10208       | CakSNP10208    | <i>Kabuli</i>    | Ca_Kabuli_Chr06              | 13827452                       | (C/G)       |
| 10209       | CakSNP10209    | <i>Kabuli</i>    | Ca_Kabuli_Chr06              | 13827444                       | (G/A)       |
| 10210       | CakSNP10210    | <i>Kabuli</i>    | Ca_Kabuli_Chr06              | 13913539                       | (A/G)       |
| 10211       | CakSNP10211    | <i>Kabuli</i>    | Ca_Kabuli_Chr06              | 13917076                       | (T/C)       |
| 10212       | CakSNP10212    | <i>Kabuli</i>    | Ca_Kabuli_Chr06              | 13917135                       | (T/A)       |
| 10213       | CakSNP10213    | <i>Kabuli</i>    | Ca_Kabuli_Chr06              | 13921954                       | (A/T)       |
| 10214       | CakSNP10214    | <i>Kabuli</i>    | Ca_Kabuli_Chr06              | 13941701                       | (A/T)       |
| 10215       | CakSNP10215    | <i>Kabuli</i>    | Ca_Kabuli_Chr06              | 13942961                       | (A/G)       |
| 10216       | CakSNP10216    | <i>Kabuli</i>    | Ca_Kabuli_Chr06              | 13948732                       | (G/T)       |
| 10217       | CakSNP10217    | <i>Kabuli</i>    | Ca_Kabuli_Chr06              | 13948751                       | (T/G)       |
| 10218       | CakSNP10218    | <i>Kabuli</i>    | Ca_Kabuli_Chr06              | 13948778                       | (A/C)       |
| 10219       | CakSNP10219    | <i>Kabuli</i>    | Ca_Kabuli_Chr06              | 13986559                       | (A/G)       |
| 10220       | CakSNP10220    | <i>Kabuli</i>    | Ca_Kabuli_Chr06              | 14042859                       | (A/T)       |
| 10221       | CakSNP10221    | <i>Kabuli</i>    | Ca_Kabuli_Chr06              | 14067312                       | (A/C)       |

| <b>S.N.</b> | <b>SNP IDs</b> | <b>Cultivars</b> | <b>Chromosomes/scaffolds</b> | <b>Physical positions (bp)</b> | <b>SNPs</b> |
|-------------|----------------|------------------|------------------------------|--------------------------------|-------------|
| 10222       | CakSNP10222    | <i>Kabuli</i>    | Ca_Kabuli_Chr06              | 14067326                       | (C/T)       |
| 10223       | CakSNP10223    | <i>Kabuli</i>    | Ca_Kabuli_Chr06              | 14112542                       | (A/G)       |
| 10224       | CakSNP10224    | <i>Kabuli</i>    | Ca_Kabuli_Chr06              | 14148771                       | (A/G)       |
| 10225       | CakSNP10225    | <i>Kabuli</i>    | Ca_Kabuli_Chr06              | 14155543                       | (C/T)       |
| 10226       | CakSNP10226    | <i>Kabuli</i>    | Ca_Kabuli_Chr06              | 14155662                       | (T/C)       |
| 10227       | CakSNP10227    | <i>Kabuli</i>    | Ca_Kabuli_Chr06              | 14155643                       | (A/C)       |
| 10228       | CakSNP10228    | <i>Kabuli</i>    | Ca_Kabuli_Chr06              | 14161084                       | (G/C)       |
| 10229       | CakSNP10229    | <i>Kabuli</i>    | Ca_Kabuli_Chr06              | 14201001                       | (T/C)       |
| 10230       | CakSNP10230    | <i>Kabuli</i>    | Ca_Kabuli_Chr06              | 14200997                       | (G/A)       |
| 10231       | CakSNP10231    | <i>Kabuli</i>    | Ca_Kabuli_Chr06              | 14204400                       | (T/C)       |
| 10232       | CakSNP10232    | <i>Kabuli</i>    | Ca_Kabuli_Chr06              | 14204469                       | (G/A)       |
| 10233       | CakSNP10233    | <i>Kabuli</i>    | Ca_Kabuli_Chr06              | 14254394                       | (A/G)       |
| 10234       | CakSNP10234    | <i>Kabuli</i>    | Ca_Kabuli_Chr06              | 14309042                       | (C/T)       |
| 10235       | CakSNP10235    | <i>Kabuli</i>    | Ca_Kabuli_Chr06              | 14330533                       | (T/C)       |
| 10236       | CakSNP10236    | <i>Kabuli</i>    | Ca_Kabuli_Chr06              | 14332018                       | (A/C)       |
| 10237       | CakSNP10237    | <i>Kabuli</i>    | Ca_Kabuli_Chr06              | 14332404                       | (A/G)       |
| 10238       | CakSNP10238    | <i>Kabuli</i>    | Ca_Kabuli_Chr06              | 14353598                       | (C/T)       |
| 10239       | CakSNP10239    | <i>Kabuli</i>    | Ca_Kabuli_Chr06              | 14353624                       | (G/A)       |
| 10240       | CakSNP10240    | <i>Kabuli</i>    | Ca_Kabuli_Chr06              | 14371493                       | (C/T)       |
| 10241       | CakSNP10241    | <i>Kabuli</i>    | Ca_Kabuli_Chr06              | 14371530                       | (C/T)       |
| 10242       | CakSNP10242    | <i>Kabuli</i>    | Ca_Kabuli_Chr06              | 14375135                       | (G/A)       |
| 10243       | CakSNP10243    | <i>Kabuli</i>    | Ca_Kabuli_Chr06              | 14375141                       | (G/C)       |
| 10244       | CakSNP10244    | <i>Kabuli</i>    | Ca_Kabuli_Chr06              | 14375172                       | (A/G)       |
| 10245       | CakSNP10245    | <i>Kabuli</i>    | Ca_Kabuli_Chr06              | 14375196                       | (G/A)       |
| 10246       | CakSNP10246    | <i>Kabuli</i>    | Ca_Kabuli_Chr06              | 14375207                       | (C/T)       |
| 10247       | CakSNP10247    | <i>Kabuli</i>    | Ca_Kabuli_Chr06              | 14401990                       | (G/A)       |
| 10248       | CakSNP10248    | <i>Kabuli</i>    | Ca_Kabuli_Chr06              | 14416997                       | (A/G)       |
| 10249       | CakSNP10249    | <i>Kabuli</i>    | Ca_Kabuli_Chr06              | 14416981                       | (A/G)       |
| 10250       | CakSNP10250    | <i>Kabuli</i>    | Ca_Kabuli_Chr06              | 14419832                       | (C/T)       |
| 10251       | CakSNP10251    | <i>Kabuli</i>    | Ca_Kabuli_Chr06              | 14526540                       | (A/T)       |
| 10252       | CakSNP10252    | <i>Kabuli</i>    | Ca_Kabuli_Chr06              | 14589478                       | (T/G)       |
| 10253       | CakSNP10253    | <i>Kabuli</i>    | Ca_Kabuli_Chr06              | 14589480                       | (T/C)       |
| 10254       | CakSNP10254    | <i>Kabuli</i>    | Ca_Kabuli_Chr06              | 14589520                       | (G/C)       |
| 10255       | CakSNP10255    | <i>Kabuli</i>    | Ca_Kabuli_Chr06              | 14589744                       | (C/T)       |
| 10256       | CakSNP10256    | <i>Kabuli</i>    | Ca_Kabuli_Chr06              | 14589807                       | (T/G)       |
| 10257       | CakSNP10257    | <i>Kabuli</i>    | Ca_Kabuli_Chr06              | 14589873                       | (T/C)       |
| 10258       | CakSNP10258    | <i>Kabuli</i>    | Ca_Kabuli_Chr06              | 14606892                       | (A/C)       |
| 10259       | CakSNP10259    | <i>Kabuli</i>    | Ca_Kabuli_Chr06              | 14628213                       | (A/T)       |



| <b>S.N.</b> | <b>SNP IDs</b> | <b>Cultivars</b> | <b>Chromosomes/scaffolds</b> | <b>Physical positions (bp)</b> | <b>SNPs</b> |
|-------------|----------------|------------------|------------------------------|--------------------------------|-------------|
| 10260       | CakSNP10260    | <i>Kabuli</i>    | Ca_Kabuli_Chr06              | 14628215                       | (T/C)       |
| 10261       | CakSNP10261    | <i>Kabuli</i>    | Ca_Kabuli_Chr06              | 14628216                       | (A/C)       |
| 10262       | CakSNP10262    | <i>Kabuli</i>    | Ca_Kabuli_Chr06              | 14628284                       | (G/A)       |
| 10263       | CakSNP10263    | <i>Kabuli</i>    | Ca_Kabuli_Chr06              | 14719793                       | (T/C)       |
| 10264       | CakSNP10264    | <i>Kabuli</i>    | Ca_Kabuli_Chr06              | 14719840                       | (G/T)       |
| 10265       | CakSNP10265    | <i>Kabuli</i>    | Ca_Kabuli_Chr06              | 14747608                       | (T/C)       |
| 10266       | CakSNP10266    | <i>Kabuli</i>    | Ca_Kabuli_Chr06              | 14753191                       | (C/T)       |
| 10267       | CakSNP10267    | <i>Kabuli</i>    | Ca_Kabuli_Chr06              | 14753190                       | (G/A)       |
| 10268       | CakSNP10268    | <i>Kabuli</i>    | Ca_Kabuli_Chr06              | 14753158                       | (A/G)       |
| 10269       | CakSNP10269    | <i>Kabuli</i>    | Ca_Kabuli_Chr06              | 14753113                       | (C/A)       |
| 10270       | CakSNP10270    | <i>Kabuli</i>    | Ca_Kabuli_Chr06              | 14753145                       | (C/A)       |
| 10271       | CakSNP10271    | <i>Kabuli</i>    | Ca_Kabuli_Chr06              | 14753150                       | (G/A)       |
| 10272       | CakSNP10272    | <i>Kabuli</i>    | Ca_Kabuli_Chr06              | 14762493                       | (A/G)       |
| 10273       | CakSNP10273    | <i>Kabuli</i>    | Ca_Kabuli_Chr06              | 14771564                       | (G/T)       |
| 10274       | CakSNP10274    | <i>Kabuli</i>    | Ca_Kabuli_Chr06              | 14771709                       | (G/A)       |
| 10275       | CakSNP10275    | <i>Kabuli</i>    | Ca_Kabuli_Chr06              | 14786015                       | (T/G)       |
| 10276       | CakSNP10276    | <i>Kabuli</i>    | Ca_Kabuli_Chr06              | 14789964                       | (A/C)       |
| 10277       | CakSNP10277    | <i>Kabuli</i>    | Ca_Kabuli_Chr06              | 14846794                       | (C/T)       |
| 10278       | CakSNP10278    | <i>Kabuli</i>    | Ca_Kabuli_Chr06              | 14857722                       | (C/A)       |
| 10279       | CakSNP10279    | <i>Kabuli</i>    | Ca_Kabuli_Chr06              | 14857709                       | (A/G)       |
| 10280       | CakSNP10280    | <i>Kabuli</i>    | Ca_Kabuli_Chr06              | 14857680                       | (G/A)       |
| 10281       | CakSNP10281    | <i>Kabuli</i>    | Ca_Kabuli_Chr06              | 14861487                       | (T/A)       |
| 10282       | CakSNP10282    | <i>Kabuli</i>    | Ca_Kabuli_Chr06              | 14884604                       | (T/G)       |
| 10283       | CakSNP10283    | <i>Kabuli</i>    | Ca_Kabuli_Chr06              | 14884606                       | (T/C)       |
| 10284       | CakSNP10284    | <i>Kabuli</i>    | Ca_Kabuli_Chr06              | 14891588                       | (T/C)       |
| 10285       | CakSNP10285    | <i>Kabuli</i>    | Ca_Kabuli_Chr06              | 14891533                       | (T/C)       |
| 10286       | CakSNP10286    | <i>Kabuli</i>    | Ca_Kabuli_Chr06              | 14891597                       | (C/T)       |
| 10287       | CakSNP10287    | <i>Kabuli</i>    | Ca_Kabuli_Chr06              | 14891626                       | (C/A)       |
| 10288       | CakSNP10288    | <i>Kabuli</i>    | Ca_Kabuli_Chr06              | 14941348                       | (C/T)       |
| 10289       | CakSNP10289    | <i>Kabuli</i>    | Ca_Kabuli_Chr06              | 14951877                       | (C/T)       |
| 10290       | CakSNP10290    | <i>Kabuli</i>    | Ca_Kabuli_Chr06              | 14951860                       | (G/A)       |
| 10291       | CakSNP10291    | <i>Kabuli</i>    | Ca_Kabuli_Chr06              | 14982998                       | (T/C)       |
| 10292       | CakSNP10292    | <i>Kabuli</i>    | Ca_Kabuli_Chr06              | 14983391                       | (C/T)       |
| 10293       | CakSNP10293    | <i>Kabuli</i>    | Ca_Kabuli_Chr06              | 15024904                       | (C/A)       |
| 10294       | CakSNP10294    | <i>Kabuli</i>    | Ca_Kabuli_Chr06              | 15024881                       | (C/A)       |
| 10295       | CakSNP10295    | <i>Kabuli</i>    | Ca_Kabuli_Chr06              | 15024979                       | (T/G)       |
| 10296       | CakSNP10296    | <i>Kabuli</i>    | Ca_Kabuli_Chr06              | 15024999                       | (T/A)       |
| 10297       | CakSNP10297    | <i>Kabuli</i>    | Ca_Kabuli_Chr06              | 15025010                       | (T/C)       |

| <b>S.N.</b> | <b>SNP IDs</b> | <b>Cultivars</b> | <b>Chromosomes/scaffolds</b> | <b>Physical positions (bp)</b> | <b>SNPs</b> |
|-------------|----------------|------------------|------------------------------|--------------------------------|-------------|
| 10298       | CakSNP10298    | <i>Kabuli</i>    | Ca_Kabuli_Chr06              | 15025012                       | (A/C)       |
| 10299       | CakSNP10299    | <i>Kabuli</i>    | Ca_Kabuli_Chr06              | 15051094                       | (T/C)       |
| 10300       | CakSNP10300    | <i>Kabuli</i>    | Ca_Kabuli_Chr06              | 15061717                       | (G/A)       |
| 10301       | CakSNP10301    | <i>Kabuli</i>    | Ca_Kabuli_Chr06              | 15123739                       | (C/T)       |
| 10302       | CakSNP10302    | <i>Kabuli</i>    | Ca_Kabuli_Chr06              | 15123771                       | (T/C)       |
| 10303       | CakSNP10303    | <i>Kabuli</i>    | Ca_Kabuli_Chr06              | 15123827                       | (T/G)       |
| 10304       | CakSNP10304    | <i>Kabuli</i>    | Ca_Kabuli_Chr06              | 15123947                       | (G/A)       |
| 10305       | CakSNP10305    | <i>Kabuli</i>    | Ca_Kabuli_Chr06              | 15173607                       | (G/A)       |
| 10306       | CakSNP10306    | <i>Kabuli</i>    | Ca_Kabuli_Chr06              | 15185723                       | (T/C)       |
| 10307       | CakSNP10307    | <i>Kabuli</i>    | Ca_Kabuli_Chr06              | 15204957                       | (G/C)       |
| 10308       | CakSNP10308    | <i>Kabuli</i>    | Ca_Kabuli_Chr06              | 15235575                       | (A/G)       |
| 10309       | CakSNP10309    | <i>Kabuli</i>    | Ca_Kabuli_Chr06              | 15235576                       | (C/T)       |
| 10310       | CakSNP10310    | <i>Kabuli</i>    | Ca_Kabuli_Chr06              | 15235615                       | (C/T)       |
| 10311       | CakSNP10311    | <i>Kabuli</i>    | Ca_Kabuli_Chr06              | 15243538                       | (A/T)       |
| 10312       | CakSNP10312    | <i>Kabuli</i>    | Ca_Kabuli_Chr06              | 15243590                       | (A/G)       |
| 10313       | CakSNP10313    | <i>Kabuli</i>    | Ca_Kabuli_Chr06              | 15243630                       | (C/T)       |
| 10314       | CakSNP10314    | <i>Kabuli</i>    | Ca_Kabuli_Chr06              | 15243674                       | (T/A)       |
| 10315       | CakSNP10315    | <i>Kabuli</i>    | Ca_Kabuli_Chr06              | 15268491                       | (T/G)       |
| 10316       | CakSNP10316    | <i>Kabuli</i>    | Ca_Kabuli_Chr06              | 15294332                       | (T/G)       |
| 10317       | CakSNP10317    | <i>Kabuli</i>    | Ca_Kabuli_Chr06              | 15294331                       | (C/T)       |
| 10318       | CakSNP10318    | <i>Kabuli</i>    | Ca_Kabuli_Chr06              | 15294329                       | (A/C)       |
| 10319       | CakSNP10319    | <i>Kabuli</i>    | Ca_Kabuli_Chr06              | 15301137                       | (C/T)       |
| 10320       | CakSNP10320    | <i>Kabuli</i>    | Ca_Kabuli_Chr06              | 15313655                       | (G/T)       |
| 10321       | CakSNP10321    | <i>Kabuli</i>    | Ca_Kabuli_Chr06              | 15328759                       | (C/A)       |
| 10322       | CakSNP10322    | <i>Kabuli</i>    | Ca_Kabuli_Chr06              | 15328805                       | (A/T)       |
| 10323       | CakSNP10323    | <i>Kabuli</i>    | Ca_Kabuli_Chr06              | 15328948                       | (A/C)       |
| 10324       | CakSNP10324    | <i>Kabuli</i>    | Ca_Kabuli_Chr06              | 15347707                       | (C/T)       |
| 10325       | CakSNP10325    | <i>Kabuli</i>    | Ca_Kabuli_Chr06              | 15393321                       | (A/T)       |
| 10326       | CakSNP10326    | <i>Kabuli</i>    | Ca_Kabuli_Chr06              | 15393349                       | (T/C)       |
| 10327       | CakSNP10327    | <i>Kabuli</i>    | Ca_Kabuli_Chr06              | 15463326                       | (C/G)       |
| 10328       | CakSNP10328    | <i>Kabuli</i>    | Ca_Kabuli_Chr06              | 15475948                       | (A/G)       |
| 10329       | CakSNP10329    | <i>Kabuli</i>    | Ca_Kabuli_Chr06              | 15488265                       | (C/T)       |
| 10330       | CakSNP10330    | <i>Kabuli</i>    | Ca_Kabuli_Chr06              | 15488314                       | (A/T)       |
| 10331       | CakSNP10331    | <i>Kabuli</i>    | Ca_Kabuli_Chr06              | 15488309                       | (G/A)       |
| 10332       | CakSNP10332    | <i>Kabuli</i>    | Ca_Kabuli_Chr06              | 15510433                       | (A/T)       |
| 10333       | CakSNP10333    | <i>Kabuli</i>    | Ca_Kabuli_Chr06              | 15510397                       | (G/A)       |
| 10334       | CakSNP10334    | <i>Kabuli</i>    | Ca_Kabuli_Chr06              | 15537908                       | (A/C)       |
| 10335       | CakSNP10335    | <i>Kabuli</i>    | Ca_Kabuli_Chr06              | 15543295                       | (C/G)       |

| <b>S.N.</b> | <b>SNP IDs</b> | <b>Cultivars</b> | <b>Chromosomes/scaffolds</b> | <b>Physical positions (bp)</b> | <b>SNPs</b> |
|-------------|----------------|------------------|------------------------------|--------------------------------|-------------|
| 10336       | CakSNP10336    | <i>Kabuli</i>    | Ca_Kabuli_Chr06              | 15543293                       | (T/G)       |
| 10337       | CakSNP10337    | <i>Kabuli</i>    | Ca_Kabuli_Chr06              | 15543286                       | (G/A)       |
| 10338       | CakSNP10338    | <i>Kabuli</i>    | Ca_Kabuli_Chr06              | 15550044                       | (C/T)       |
| 10339       | CakSNP10339    | <i>Kabuli</i>    | Ca_Kabuli_Chr06              | 15589539                       | (A/T)       |
| 10340       | CakSNP10340    | <i>Kabuli</i>    | Ca_Kabuli_Chr06              | 15589885                       | (G/T)       |
| 10341       | CakSNP10341    | <i>Kabuli</i>    | Ca_Kabuli_Chr06              | 15635126                       | (A/T)       |
| 10342       | CakSNP10342    | <i>Kabuli</i>    | Ca_Kabuli_Chr06              | 15644412                       | (A/T)       |
| 10343       | CakSNP10343    | <i>Kabuli</i>    | Ca_Kabuli_Chr06              | 15644796                       | (A/T)       |
| 10344       | CakSNP10344    | <i>Kabuli</i>    | Ca_Kabuli_Chr06              | 15857728                       | (T/C)       |
| 10345       | CakSNP10345    | <i>Kabuli</i>    | Ca_Kabuli_Chr06              | 15861278                       | (G/A)       |
| 10346       | CakSNP10346    | <i>Kabuli</i>    | Ca_Kabuli_Chr06              | 16113523                       | (T/C)       |
| 10347       | CakSNP10347    | <i>Kabuli</i>    | Ca_Kabuli_Chr06              | 16113522                       | (A/T)       |
| 10348       | CakSNP10348    | <i>Kabuli</i>    | Ca_Kabuli_Chr06              | 16113521                       | (G/T)       |
| 10349       | CakSNP10349    | <i>Kabuli</i>    | Ca_Kabuli_Chr06              | 16115933                       | (T/C)       |
| 10350       | CakSNP10350    | <i>Kabuli</i>    | Ca_Kabuli_Chr06              | 16147469                       | (A/G)       |
| 10351       | CakSNP10351    | <i>Kabuli</i>    | Ca_Kabuli_Chr06              | 16148277                       | (A/C)       |
| 10352       | CakSNP10352    | <i>Kabuli</i>    | Ca_Kabuli_Chr06              | 16189692                       | (C/A)       |
| 10353       | CakSNP10353    | <i>Kabuli</i>    | Ca_Kabuli_Chr06              | 16189693                       | (G/T)       |
| 10354       | CakSNP10354    | <i>Kabuli</i>    | Ca_Kabuli_Chr06              | 16195748                       | (T/C)       |
| 10355       | CakSNP10355    | <i>Kabuli</i>    | Ca_Kabuli_Chr06              | 16196582                       | (G/C)       |
| 10356       | CakSNP10356    | <i>Kabuli</i>    | Ca_Kabuli_Chr06              | 16315552                       | (T/A)       |
| 10357       | CakSNP10357    | <i>Kabuli</i>    | Ca_Kabuli_Chr06              | 16332377                       | (G/A)       |
| 10358       | CakSNP10358    | <i>Kabuli</i>    | Ca_Kabuli_Chr06              | 16353698                       | (G/A)       |
| 10359       | CakSNP10359    | <i>Kabuli</i>    | Ca_Kabuli_Chr06              | 16450107                       | (C/T)       |
| 10360       | CakSNP10360    | <i>Kabuli</i>    | Ca_Kabuli_Chr06              | 16460495                       | (A/C)       |
| 10361       | CakSNP10361    | <i>Kabuli</i>    | Ca_Kabuli_Chr06              | 16561334                       | (C/T)       |
| 10362       | CakSNP10362    | <i>Kabuli</i>    | Ca_Kabuli_Chr06              | 16635061                       | (C/T)       |
| 10363       | CakSNP10363    | <i>Kabuli</i>    | Ca_Kabuli_Chr06              | 16646769                       | (A/T)       |
| 10364       | CakSNP10364    | <i>Kabuli</i>    | Ca_Kabuli_Chr06              | 16646713                       | (T/G)       |
| 10365       | CakSNP10365    | <i>Kabuli</i>    | Ca_Kabuli_Chr06              | 16665385                       | (G/C)       |
| 10366       | CakSNP10366    | <i>Kabuli</i>    | Ca_Kabuli_Chr06              | 16665477                       | (T/C)       |
| 10367       | CakSNP10367    | <i>Kabuli</i>    | Ca_Kabuli_Chr06              | 16665829                       | (G/C)       |
| 10368       | CakSNP10368    | <i>Kabuli</i>    | Ca_Kabuli_Chr06              | 16677320                       | (C/A)       |
| 10369       | CakSNP10369    | <i>Kabuli</i>    | Ca_Kabuli_Chr06              | 16717984                       | (G/A)       |
| 10370       | CakSNP10370    | <i>Kabuli</i>    | Ca_Kabuli_Chr06              | 16718201                       | (G/A)       |
| 10371       | CakSNP10371    | <i>Kabuli</i>    | Ca_Kabuli_Chr06              | 16719918                       | (C/A)       |
| 10372       | CakSNP10372    | <i>Kabuli</i>    | Ca_Kabuli_Chr06              | 16719919                       | (T/G)       |
| 10373       | CakSNP10373    | <i>Kabuli</i>    | Ca_Kabuli_Chr06              | 16741672                       | (C/T)       |

| <b>S.N.</b> | <b>SNP IDs</b> | <b>Cultivars</b> | <b>Chromosomes/scaffolds</b> | <b>Physical positions (bp)</b> | <b>SNPs</b> |
|-------------|----------------|------------------|------------------------------|--------------------------------|-------------|
| 10374       | CakSNP10374    | <i>Kabuli</i>    | Ca_Kabuli_Chr06              | 16748675                       | (A/C)       |
| 10375       | CakSNP10375    | <i>Kabuli</i>    | Ca_Kabuli_Chr06              | 16768782                       | (G/A)       |
| 10376       | CakSNP10376    | <i>Kabuli</i>    | Ca_Kabuli_Chr06              | 16823954                       | (A/G)       |
| 10377       | CakSNP10377    | <i>Kabuli</i>    | Ca_Kabuli_Chr06              | 16932014                       | (C/G)       |
| 10378       | CakSNP10378    | <i>Kabuli</i>    | Ca_Kabuli_Chr06              | 17048493                       | (A/C)       |
| 10379       | CakSNP10379    | <i>Kabuli</i>    | Ca_Kabuli_Chr06              | 17096214                       | (C/T)       |
| 10380       | CakSNP10380    | <i>Kabuli</i>    | Ca_Kabuli_Chr06              | 17096215                       | (G/A)       |
| 10381       | CakSNP10381    | <i>Kabuli</i>    | Ca_Kabuli_Chr06              | 17096224                       | (C/T)       |
| 10382       | CakSNP10382    | <i>Kabuli</i>    | Ca_Kabuli_Chr06              | 17129574                       | (A/G)       |
| 10383       | CakSNP10383    | <i>Kabuli</i>    | Ca_Kabuli_Chr06              | 17148605                       | (G/A)       |
| 10384       | CakSNP10384    | <i>Kabuli</i>    | Ca_Kabuli_Chr06              | 17148773                       | (A/G)       |
| 10385       | CakSNP10385    | <i>Kabuli</i>    | Ca_Kabuli_Chr06              | 17175334                       | (C/A)       |
| 10386       | CakSNP10386    | <i>Kabuli</i>    | Ca_Kabuli_Chr06              | 17175446                       | (G/A)       |
| 10387       | CakSNP10387    | <i>Kabuli</i>    | Ca_Kabuli_Chr06              | 17258827                       | (C/A)       |
| 10388       | CakSNP10388    | <i>Kabuli</i>    | Ca_Kabuli_Chr06              | 17258886                       | (T/G)       |
| 10389       | CakSNP10389    | <i>Kabuli</i>    | Ca_Kabuli_Chr06              | 17262283                       | (C/T)       |
| 10390       | CakSNP10390    | <i>Kabuli</i>    | Ca_Kabuli_Chr06              | 17263126                       | (G/A)       |
| 10391       | CakSNP10391    | <i>Kabuli</i>    | Ca_Kabuli_Chr06              | 17369613                       | (A/G)       |
| 10392       | CakSNP10392    | <i>Kabuli</i>    | Ca_Kabuli_Chr06              | 17445945                       | (T/G)       |
| 10393       | CakSNP10393    | <i>Kabuli</i>    | Ca_Kabuli_Chr06              | 17477741                       | (A/G)       |
| 10394       | CakSNP10394    | <i>Kabuli</i>    | Ca_Kabuli_Chr06              | 17478220                       | (G/A)       |
| 10395       | CakSNP10395    | <i>Kabuli</i>    | Ca_Kabuli_Chr06              | 17480486                       | (G/C)       |
| 10396       | CakSNP10396    | <i>Kabuli</i>    | Ca_Kabuli_Chr06              | 17481288                       | (T/C)       |
| 10397       | CakSNP10397    | <i>Kabuli</i>    | Ca_Kabuli_Chr06              | 17481307                       | (C/A)       |
| 10398       | CakSNP10398    | <i>Kabuli</i>    | Ca_Kabuli_Chr06              | 17481403                       | (T/G)       |
| 10399       | CakSNP10399    | <i>Kabuli</i>    | Ca_Kabuli_Chr06              | 17481392                       | (A/G)       |
| 10400       | CakSNP10400    | <i>Kabuli</i>    | Ca_Kabuli_Chr06              | 17482626                       | (A/G)       |
| 10401       | CakSNP10401    | <i>Kabuli</i>    | Ca_Kabuli_Chr06              | 17482640                       | (C/T)       |
| 10402       | CakSNP10402    | <i>Kabuli</i>    | Ca_Kabuli_Chr06              | 17482649                       | (A/G)       |
| 10403       | CakSNP10403    | <i>Kabuli</i>    | Ca_Kabuli_Chr06              | 17482718                       | (G/A)       |
| 10404       | CakSNP10404    | <i>Kabuli</i>    | Ca_Kabuli_Chr06              | 17482697                       | (A/G)       |
| 10405       | CakSNP10405    | <i>Kabuli</i>    | Ca_Kabuli_Chr06              | 17573309                       | (A/G)       |
| 10406       | CakSNP10406    | <i>Kabuli</i>    | Ca_Kabuli_Chr06              | 17659067                       | (A/C)       |
| 10407       | CakSNP10407    | <i>Kabuli</i>    | Ca_Kabuli_Chr06              | 17741078                       | (G/A)       |
| 10408       | CakSNP10408    | <i>Kabuli</i>    | Ca_Kabuli_Chr06              | 18027391                       | (G/A)       |
| 10409       | CakSNP10409    | <i>Kabuli</i>    | Ca_Kabuli_Chr06              | 18094691                       | (C/A)       |
| 10410       | CakSNP10410    | <i>Kabuli</i>    | Ca_Kabuli_Chr06              | 18125613                       | (C/A)       |
| 10411       | CakSNP10411    | <i>Kabuli</i>    | Ca_Kabuli_Chr06              | 18232696                       | (G/A)       |

| <b>S.N.</b> | <b>SNP IDs</b> | <b>Cultivars</b> | <b>Chromosomes/scaffolds</b> | <b>Physical positions (bp)</b> | <b>SNPs</b> |
|-------------|----------------|------------------|------------------------------|--------------------------------|-------------|
| 10412       | CakSNP10412    | <i>Kabuli</i>    | Ca_Kabuli_Chr06              | 18268960                       | (G/A)       |
| 10413       | CakSNP10413    | <i>Kabuli</i>    | Ca_Kabuli_Chr06              | 18268982                       | (A/G)       |
| 10414       | CakSNP10414    | <i>Kabuli</i>    | Ca_Kabuli_Chr06              | 18389704                       | (T/G)       |
| 10415       | CakSNP10415    | <i>Kabuli</i>    | Ca_Kabuli_Chr06              | 18389661                       | (A/C)       |
| 10416       | CakSNP10416    | <i>Kabuli</i>    | Ca_Kabuli_Chr06              | 18444725                       | (T/C)       |
| 10417       | CakSNP10417    | <i>Kabuli</i>    | Ca_Kabuli_Chr06              | 18549073                       | (T/C)       |
| 10418       | CakSNP10418    | <i>Kabuli</i>    | Ca_Kabuli_Chr06              | 18562366                       | (C/A)       |
| 10419       | CakSNP10419    | <i>Kabuli</i>    | Ca_Kabuli_Chr06              | 18664114                       | (A/T)       |
| 10420       | CakSNP10420    | <i>Kabuli</i>    | Ca_Kabuli_Chr06              | 18747207                       | (G/A)       |
| 10421       | CakSNP10421    | <i>Kabuli</i>    | Ca_Kabuli_Chr06              | 18752554                       | (G/T)       |
| 10422       | CakSNP10422    | <i>Kabuli</i>    | Ca_Kabuli_Chr06              | 18767357                       | (G/A)       |
| 10423       | CakSNP10423    | <i>Kabuli</i>    | Ca_Kabuli_Chr06              | 18771093                       | (T/A)       |
| 10424       | CakSNP10424    | <i>Kabuli</i>    | Ca_Kabuli_Chr06              | 18798747                       | (A/C)       |
| 10425       | CakSNP10425    | <i>Kabuli</i>    | Ca_Kabuli_Chr06              | 18852806                       | (T/C)       |
| 10426       | CakSNP10426    | <i>Kabuli</i>    | Ca_Kabuli_Chr06              | 18852854                       | (T/C)       |
| 10427       | CakSNP10427    | <i>Kabuli</i>    | Ca_Kabuli_Chr06              | 18876221                       | (T/C)       |
| 10428       | CakSNP10428    | <i>Kabuli</i>    | Ca_Kabuli_Chr06              | 18876213                       | (A/G)       |
| 10429       | CakSNP10429    | <i>Kabuli</i>    | Ca_Kabuli_Chr06              | 18899989                       | (C/A)       |
| 10430       | CakSNP10430    | <i>Kabuli</i>    | Ca_Kabuli_Chr06              | 18900031                       | (C/T)       |
| 10431       | CakSNP10431    | <i>Kabuli</i>    | Ca_Kabuli_Chr06              | 18900034                       | (G/A)       |
| 10432       | CakSNP10432    | <i>Kabuli</i>    | Ca_Kabuli_Chr06              | 18916626                       | (G/T)       |
| 10433       | CakSNP10433    | <i>Kabuli</i>    | Ca_Kabuli_Chr06              | 18916619                       | (C/T)       |
| 10434       | CakSNP10434    | <i>Kabuli</i>    | Ca_Kabuli_Chr06              | 18925002                       | (A/G)       |
| 10435       | CakSNP10435    | <i>Kabuli</i>    | Ca_Kabuli_Chr06              | 18938479                       | (C/T)       |
| 10436       | CakSNP10436    | <i>Kabuli</i>    | Ca_Kabuli_Chr06              | 18938512                       | (G/A)       |
| 10437       | CakSNP10437    | <i>Kabuli</i>    | Ca_Kabuli_Chr06              | 18956194                       | (G/A)       |
| 10438       | CakSNP10438    | <i>Kabuli</i>    | Ca_Kabuli_Chr06              | 18987220                       | (T/G)       |
| 10439       | CakSNP10439    | <i>Kabuli</i>    | Ca_Kabuli_Chr06              | 18999175                       | (C/T)       |
| 10440       | CakSNP10440    | <i>Kabuli</i>    | Ca_Kabuli_Chr06              | 19033068                       | (A/C)       |
| 10441       | CakSNP10441    | <i>Kabuli</i>    | Ca_Kabuli_Chr06              | 19033309                       | (G/A)       |
| 10442       | CakSNP10442    | <i>Kabuli</i>    | Ca_Kabuli_Chr06              | 19034129                       | (A/G)       |
| 10443       | CakSNP10443    | <i>Kabuli</i>    | Ca_Kabuli_Chr06              | 19125254                       | (G/A)       |
| 10444       | CakSNP10444    | <i>Kabuli</i>    | Ca_Kabuli_Chr06              | 19125222                       | (T/C)       |
| 10445       | CakSNP10445    | <i>Kabuli</i>    | Ca_Kabuli_Chr06              | 19129651                       | (T/C)       |
| 10446       | CakSNP10446    | <i>Kabuli</i>    | Ca_Kabuli_Chr06              | 19169687                       | (T/C)       |
| 10447       | CakSNP10447    | <i>Kabuli</i>    | Ca_Kabuli_Chr06              | 19195656                       | (A/T)       |
| 10448       | CakSNP10448    | <i>Kabuli</i>    | Ca_Kabuli_Chr06              | 19195659                       | (A/C)       |
| 10449       | CakSNP10449    | <i>Kabuli</i>    | Ca_Kabuli_Chr06              | 19198386                       | (G/A)       |

| <b>S.N.</b> | <b>SNP IDs</b> | <b>Cultivars</b> | <b>Chromosomes/scaffolds</b> | <b>Physical positions (bp)</b> | <b>SNPs</b> |
|-------------|----------------|------------------|------------------------------|--------------------------------|-------------|
| 10450       | CakSNP10450    | <i>Kabuli</i>    | Ca_Kabuli_Chr06              | 19217820                       | (G/A)       |
| 10451       | CakSNP10451    | <i>Kabuli</i>    | Ca_Kabuli_Chr06              | 19304834                       | (A/G)       |
| 10452       | CakSNP10452    | <i>Kabuli</i>    | Ca_Kabuli_Chr06              | 19440988                       | (T/C)       |
| 10453       | CakSNP10453    | <i>Kabuli</i>    | Ca_Kabuli_Chr06              | 19441372                       | (T/C)       |
| 10454       | CakSNP10454    | <i>Kabuli</i>    | Ca_Kabuli_Chr06              | 19450845                       | (T/A)       |
| 10455       | CakSNP10455    | <i>Kabuli</i>    | Ca_Kabuli_Chr06              | 19458843                       | (C/T)       |
| 10456       | CakSNP10456    | <i>Kabuli</i>    | Ca_Kabuli_Chr06              | 19458898                       | (T/A)       |
| 10457       | CakSNP10457    | <i>Kabuli</i>    | Ca_Kabuli_Chr06              | 19458908                       | (A/T)       |
| 10458       | CakSNP10458    | <i>Kabuli</i>    | Ca_Kabuli_Chr06              | 19476915                       | (T/C)       |
| 10459       | CakSNP10459    | <i>Kabuli</i>    | Ca_Kabuli_Chr06              | 19476916                       | (A/G)       |
| 10460       | CakSNP10460    | <i>Kabuli</i>    | Ca_Kabuli_Chr06              | 19477006                       | (T/C)       |
| 10461       | CakSNP10461    | <i>Kabuli</i>    | Ca_Kabuli_Chr06              | 19478493                       | (T/A)       |
| 10462       | CakSNP10462    | <i>Kabuli</i>    | Ca_Kabuli_Chr06              | 19494588                       | (G/T)       |
| 10463       | CakSNP10463    | <i>Kabuli</i>    | Ca_Kabuli_Chr06              | 19494584                       | (C/A)       |
| 10464       | CakSNP10464    | <i>Kabuli</i>    | Ca_Kabuli_Chr06              | 19551459                       | (G/A)       |
| 10465       | CakSNP10465    | <i>Kabuli</i>    | Ca_Kabuli_Chr06              | 19551504                       | (G/C)       |
| 10466       | CakSNP10466    | <i>Kabuli</i>    | Ca_Kabuli_Chr06              | 19556904                       | (G/A)       |
| 10467       | CakSNP10467    | <i>Kabuli</i>    | Ca_Kabuli_Chr06              | 19557045                       | (C/T)       |
| 10468       | CakSNP10468    | <i>Kabuli</i>    | Ca_Kabuli_Chr06              | 19578972                       | (T/C)       |
| 10469       | CakSNP10469    | <i>Kabuli</i>    | Ca_Kabuli_Chr06              | 19725007                       | (T/A)       |
| 10470       | CakSNP10470    | <i>Kabuli</i>    | Ca_Kabuli_Chr06              | 20505641                       | (A/T)       |
| 10471       | CakSNP10471    | <i>Kabuli</i>    | Ca_Kabuli_Chr06              | 20558142                       | (C/T)       |
| 10472       | CakSNP10472    | <i>Kabuli</i>    | Ca_Kabuli_Chr06              | 20558138                       | (G/A)       |
| 10473       | CakSNP10473    | <i>Kabuli</i>    | Ca_Kabuli_Chr06              | 20660779                       | (T/C)       |
| 10474       | CakSNP10474    | <i>Kabuli</i>    | Ca_Kabuli_Chr06              | 20660782                       | (T/C)       |
| 10475       | CakSNP10475    | <i>Kabuli</i>    | Ca_Kabuli_Chr06              | 20660819                       | (T/C)       |
| 10476       | CakSNP10476    | <i>Kabuli</i>    | Ca_Kabuli_Chr06              | 20660820                       | (T/A)       |
| 10477       | CakSNP10477    | <i>Kabuli</i>    | Ca_Kabuli_Chr06              | 20660841                       | (A/G)       |
| 10478       | CakSNP10478    | <i>Kabuli</i>    | Ca_Kabuli_Chr06              | 20660870                       | (G/C)       |
| 10479       | CakSNP10479    | <i>Kabuli</i>    | Ca_Kabuli_Chr06              | 20671043                       | (T/C)       |
| 10480       | CakSNP10480    | <i>Kabuli</i>    | Ca_Kabuli_Chr06              | 20739258                       | (A/T)       |
| 10481       | CakSNP10481    | <i>Kabuli</i>    | Ca_Kabuli_Chr06              | 20739340                       | (A/G)       |
| 10482       | CakSNP10482    | <i>Kabuli</i>    | Ca_Kabuli_Chr06              | 20766342                       | (T/A)       |
| 10483       | CakSNP10483    | <i>Kabuli</i>    | Ca_Kabuli_Chr06              | 20766377                       | (C/A)       |
| 10484       | CakSNP10484    | <i>Kabuli</i>    | Ca_Kabuli_Chr06              | 20766397                       | (G/T)       |
| 10485       | CakSNP10485    | <i>Kabuli</i>    | Ca_Kabuli_Chr06              | 20770728                       | (C/T)       |
| 10486       | CakSNP10486    | <i>Kabuli</i>    | Ca_Kabuli_Chr06              | 20776473                       | (A/G)       |
| 10487       | CakSNP10487    | <i>Kabuli</i>    | Ca_Kabuli_Chr06              | 20786079                       | (T/A)       |

| <b>S.N.</b> | <b>SNP IDs</b> | <b>Cultivars</b> | <b>Chromosomes/scaffolds</b> | <b>Physical positions (bp)</b> | <b>SNPs</b> |
|-------------|----------------|------------------|------------------------------|--------------------------------|-------------|
| 10488       | CakSNP10488    | <i>Kabuli</i>    | Ca_Kabuli_Chr06              | 20802747                       | (G/C)       |
| 10489       | CakSNP10489    | <i>Kabuli</i>    | Ca_Kabuli_Chr06              | 20830353                       | (T/G)       |
| 10490       | CakSNP10490    | <i>Kabuli</i>    | Ca_Kabuli_Chr06              | 20830634                       | (T/A)       |
| 10491       | CakSNP10491    | <i>Kabuli</i>    | Ca_Kabuli_Chr06              | 20890714                       | (A/G)       |
| 10492       | CakSNP10492    | <i>Kabuli</i>    | Ca_Kabuli_Chr06              | 20917713                       | (A/C)       |
| 10493       | CakSNP10493    | <i>Kabuli</i>    | Ca_Kabuli_Chr06              | 20917694                       | (A/T)       |
| 10494       | CakSNP10494    | <i>Kabuli</i>    | Ca_Kabuli_Chr06              | 21025495                       | (T/A)       |
| 10495       | CakSNP10495    | <i>Kabuli</i>    | Ca_Kabuli_Chr06              | 21025494                       | (C/T)       |
| 10496       | CakSNP10496    | <i>Kabuli</i>    | Ca_Kabuli_Chr06              | 21025540                       | (C/T)       |
| 10497       | CakSNP10497    | <i>Kabuli</i>    | Ca_Kabuli_Chr06              | 21025677                       | (T/A)       |
| 10498       | CakSNP10498    | <i>Kabuli</i>    | Ca_Kabuli_Chr06              | 21025742                       | (T/G)       |
| 10499       | CakSNP10499    | <i>Kabuli</i>    | Ca_Kabuli_Chr06              | 21025706                       | (C/T)       |
| 10500       | CakSNP10500    | <i>Kabuli</i>    | Ca_Kabuli_Chr06              | 21025673                       | (C/T)       |
| 10501       | CakSNP10501    | <i>Kabuli</i>    | Ca_Kabuli_Chr06              | 21025680                       | (C/T)       |
| 10502       | CakSNP10502    | <i>Kabuli</i>    | Ca_Kabuli_Chr06              | 21025682                       | (C/T)       |
| 10503       | CakSNP10503    | <i>Kabuli</i>    | Ca_Kabuli_Chr06              | 21025712                       | (C/T)       |
| 10504       | CakSNP10504    | <i>Kabuli</i>    | Ca_Kabuli_Chr06              | 21025718                       | (C/A)       |
| 10505       | CakSNP10505    | <i>Kabuli</i>    | Ca_Kabuli_Chr06              | 21025894                       | (G/T)       |
| 10506       | CakSNP10506    | <i>Kabuli</i>    | Ca_Kabuli_Chr06              | 21054758                       | (T/C)       |
| 10507       | CakSNP10507    | <i>Kabuli</i>    | Ca_Kabuli_Chr06              | 21058286                       | (G/T)       |
| 10508       | CakSNP10508    | <i>Kabuli</i>    | Ca_Kabuli_Chr06              | 21135764                       | (C/T)       |
| 10509       | CakSNP10509    | <i>Kabuli</i>    | Ca_Kabuli_Chr06              | 21135996                       | (C/T)       |
| 10510       | CakSNP10510    | <i>Kabuli</i>    | Ca_Kabuli_Chr06              | 21139038                       | (C/G)       |
| 10511       | CakSNP10511    | <i>Kabuli</i>    | Ca_Kabuli_Chr06              | 21165963                       | (A/C)       |
| 10512       | CakSNP10512    | <i>Kabuli</i>    | Ca_Kabuli_Chr06              | 21165999                       | (G/T)       |
| 10513       | CakSNP10513    | <i>Kabuli</i>    | Ca_Kabuli_Chr06              | 21170382                       | (G/A)       |
| 10514       | CakSNP10514    | <i>Kabuli</i>    | Ca_Kabuli_Chr06              | 21170401                       | (C/A)       |
| 10515       | CakSNP10515    | <i>Kabuli</i>    | Ca_Kabuli_Chr06              | 21177330                       | (C/A)       |
| 10516       | CakSNP10516    | <i>Kabuli</i>    | Ca_Kabuli_Chr06              | 21238178                       | (A/G)       |
| 10517       | CakSNP10517    | <i>Kabuli</i>    | Ca_Kabuli_Chr06              | 21238711                       | (C/T)       |
| 10518       | CakSNP10518    | <i>Kabuli</i>    | Ca_Kabuli_Chr06              | 21238707                       | (G/T)       |
| 10519       | CakSNP10519    | <i>Kabuli</i>    | Ca_Kabuli_Chr06              | 21276479                       | (G/T)       |
| 10520       | CakSNP10520    | <i>Kabuli</i>    | Ca_Kabuli_Chr06              | 21276551                       | (C/G)       |
| 10521       | CakSNP10521    | <i>Kabuli</i>    | Ca_Kabuli_Chr06              | 21323438                       | (T/C)       |
| 10522       | CakSNP10522    | <i>Kabuli</i>    | Ca_Kabuli_Chr06              | 21323390                       | (C/G)       |
| 10523       | CakSNP10523    | <i>Kabuli</i>    | Ca_Kabuli_Chr06              | 21367869                       | (A/G)       |
| 10524       | CakSNP10524    | <i>Kabuli</i>    | Ca_Kabuli_Chr06              | 21367830                       | (T/A)       |
| 10525       | CakSNP10525    | <i>Kabuli</i>    | Ca_Kabuli_Chr06              | 21368163                       | (C/T)       |

| <b>S.N.</b> | <b>SNP IDs</b> | <b>Cultivars</b> | <b>Chromosomes/scaffolds</b> | <b>Physical positions (bp)</b> | <b>SNPs</b> |
|-------------|----------------|------------------|------------------------------|--------------------------------|-------------|
| 10526       | CakSNP10526    | <i>Kabuli</i>    | Ca_Kabuli_Chr06              | 21385915                       | (C/A)       |
| 10527       | CakSNP10527    | <i>Kabuli</i>    | Ca_Kabuli_Chr06              | 21478820                       | (G/T)       |
| 10528       | CakSNP10528    | <i>Kabuli</i>    | Ca_Kabuli_Chr06              | 21478816                       | (C/T)       |
| 10529       | CakSNP10529    | <i>Kabuli</i>    | Ca_Kabuli_Chr06              | 21483425                       | (T/G)       |
| 10530       | CakSNP10530    | <i>Kabuli</i>    | Ca_Kabuli_Chr06              | 21483429                       | (C/T)       |
| 10531       | CakSNP10531    | <i>Kabuli</i>    | Ca_Kabuli_Chr06              | 21483494                       | (T/G)       |
| 10532       | CakSNP10532    | <i>Kabuli</i>    | Ca_Kabuli_Chr06              | 21489498                       | (A/G)       |
| 10533       | CakSNP10533    | <i>Kabuli</i>    | Ca_Kabuli_Chr06              | 21506224                       | (A/C)       |
| 10534       | CakSNP10534    | <i>Kabuli</i>    | Ca_Kabuli_Chr06              | 21540338                       | (A/G)       |
| 10535       | CakSNP10535    | <i>Kabuli</i>    | Ca_Kabuli_Chr06              | 21540382                       | (T/G)       |
| 10536       | CakSNP10536    | <i>Kabuli</i>    | Ca_Kabuli_Chr06              | 21576745                       | (G/A)       |
| 10537       | CakSNP10537    | <i>Kabuli</i>    | Ca_Kabuli_Chr06              | 21602874                       | (C/T)       |
| 10538       | CakSNP10538    | <i>Kabuli</i>    | Ca_Kabuli_Chr06              | 21603102                       | (G/C)       |
| 10539       | CakSNP10539    | <i>Kabuli</i>    | Ca_Kabuli_Chr06              | 21675734                       | (T/G)       |
| 10540       | CakSNP10540    | <i>Kabuli</i>    | Ca_Kabuli_Chr06              | 21675757                       | (A/G)       |
| 10541       | CakSNP10541    | <i>Kabuli</i>    | Ca_Kabuli_Chr06              | 21675762                       | (G/T)       |
| 10542       | CakSNP10542    | <i>Kabuli</i>    | Ca_Kabuli_Chr06              | 21675816                       | (C/G)       |
| 10543       | CakSNP10543    | <i>Kabuli</i>    | Ca_Kabuli_Chr06              | 21718674                       | (G/T)       |
| 10544       | CakSNP10544    | <i>Kabuli</i>    | Ca_Kabuli_Chr06              | 21756666                       | (A/T)       |
| 10545       | CakSNP10545    | <i>Kabuli</i>    | Ca_Kabuli_Chr06              | 21756706                       | (C/T)       |
| 10546       | CakSNP10546    | <i>Kabuli</i>    | Ca_Kabuli_Chr06              | 21763468                       | (G/A)       |
| 10547       | CakSNP10547    | <i>Kabuli</i>    | Ca_Kabuli_Chr06              | 21763611                       | (C/T)       |
| 10548       | CakSNP10548    | <i>Kabuli</i>    | Ca_Kabuli_Chr06              | 21763582                       | (C/T)       |
| 10549       | CakSNP10549    | <i>Kabuli</i>    | Ca_Kabuli_Chr06              | 21804333                       | (T/A)       |
| 10550       | CakSNP10550    | <i>Kabuli</i>    | Ca_Kabuli_Chr06              | 21804337                       | (G/C)       |
| 10551       | CakSNP10551    | <i>Kabuli</i>    | Ca_Kabuli_Chr06              | 21834111                       | (C/G)       |
| 10552       | CakSNP10552    | <i>Kabuli</i>    | Ca_Kabuli_Chr06              | 21861700                       | (T/A)       |
| 10553       | CakSNP10553    | <i>Kabuli</i>    | Ca_Kabuli_Chr06              | 21914387                       | (T/C)       |
| 10554       | CakSNP10554    | <i>Kabuli</i>    | Ca_Kabuli_Chr06              | 21914380                       | (C/T)       |
| 10555       | CakSNP10555    | <i>Kabuli</i>    | Ca_Kabuli_Chr06              | 21916465                       | (G/A)       |
| 10556       | CakSNP10556    | <i>Kabuli</i>    | Ca_Kabuli_Chr06              | 21916476                       | (T/C)       |
| 10557       | CakSNP10557    | <i>Kabuli</i>    | Ca_Kabuli_Chr06              | 21940793                       | (T/C)       |
| 10558       | CakSNP10558    | <i>Kabuli</i>    | Ca_Kabuli_Chr06              | 21979846                       | (G/A)       |
| 10559       | CakSNP10559    | <i>Kabuli</i>    | Ca_Kabuli_Chr06              | 21979860                       | (C/T)       |
| 10560       | CakSNP10560    | <i>Kabuli</i>    | Ca_Kabuli_Chr06              | 21979873                       | (A/G)       |
| 10561       | CakSNP10561    | <i>Kabuli</i>    | Ca_Kabuli_Chr06              | 21979887                       | (G/A)       |
| 10562       | CakSNP10562    | <i>Kabuli</i>    | Ca_Kabuli_Chr06              | 21979889                       | (A/G)       |
| 10563       | CakSNP10563    | <i>Kabuli</i>    | Ca_Kabuli_Chr06              | 21979893                       | (C/T)       |



| <b>S.N.</b> | <b>SNP IDs</b> | <b>Cultivars</b> | <b>Chromosomes/scaffolds</b> | <b>Physical positions (bp)</b> | <b>SNPs</b> |
|-------------|----------------|------------------|------------------------------|--------------------------------|-------------|
| 10564       | CakSNP10564    | <i>Kabuli</i>    | Ca_Kabuli_Chr06              | 21979903                       | (T/C)       |
| 10565       | CakSNP10565    | <i>Kabuli</i>    | Ca_Kabuli_Chr06              | 22015915                       | (G/T)       |
| 10566       | CakSNP10566    | <i>Kabuli</i>    | Ca_Kabuli_Chr06              | 22016086                       | (A/G)       |
| 10567       | CakSNP10567    | <i>Kabuli</i>    | Ca_Kabuli_Chr06              | 22016767                       | (C/T)       |
| 10568       | CakSNP10568    | <i>Kabuli</i>    | Ca_Kabuli_Chr06              | 22016839                       | (A/G)       |
| 10569       | CakSNP10569    | <i>Kabuli</i>    | Ca_Kabuli_Chr06              | 22038857                       | (A/G)       |
| 10570       | CakSNP10570    | <i>Kabuli</i>    | Ca_Kabuli_Chr06              | 22038906                       | (A/T)       |
| 10571       | CakSNP10571    | <i>Kabuli</i>    | Ca_Kabuli_Chr06              | 22074809                       | (T/C)       |
| 10572       | CakSNP10572    | <i>Kabuli</i>    | Ca_Kabuli_Chr06              | 22075447                       | (C/G)       |
| 10573       | CakSNP10573    | <i>Kabuli</i>    | Ca_Kabuli_Chr06              | 22079148                       | (A/G)       |
| 10574       | CakSNP10574    | <i>Kabuli</i>    | Ca_Kabuli_Chr06              | 22137477                       | (A/T)       |
| 10575       | CakSNP10575    | <i>Kabuli</i>    | Ca_Kabuli_Chr06              | 22137464                       | (G/A)       |
| 10576       | CakSNP10576    | <i>Kabuli</i>    | Ca_Kabuli_Chr06              | 22137569                       | (G/T)       |
| 10577       | CakSNP10577    | <i>Kabuli</i>    | Ca_Kabuli_Chr06              | 22175547                       | (A/G)       |
| 10578       | CakSNP10578    | <i>Kabuli</i>    | Ca_Kabuli_Chr06              | 22192503                       | (G/A)       |
| 10579       | CakSNP10579    | <i>Kabuli</i>    | Ca_Kabuli_Chr06              | 22192498                       | (A/C)       |
| 10580       | CakSNP10580    | <i>Kabuli</i>    | Ca_Kabuli_Chr06              | 22194387                       | (C/A)       |
| 10581       | CakSNP10581    | <i>Kabuli</i>    | Ca_Kabuli_Chr06              | 22201688                       | (C/T)       |
| 10582       | CakSNP10582    | <i>Kabuli</i>    | Ca_Kabuli_Chr06              | 22206341                       | (G/T)       |
| 10583       | CakSNP10583    | <i>Kabuli</i>    | Ca_Kabuli_Chr06              | 22208130                       | (G/C)       |
| 10584       | CakSNP10584    | <i>Kabuli</i>    | Ca_Kabuli_Chr06              | 22208125                       | (G/A)       |
| 10585       | CakSNP10585    | <i>Kabuli</i>    | Ca_Kabuli_Chr06              | 22208093                       | (G/A)       |
| 10586       | CakSNP10586    | <i>Kabuli</i>    | Ca_Kabuli_Chr06              | 22211721                       | (C/T)       |
| 10587       | CakSNP10587    | <i>Kabuli</i>    | Ca_Kabuli_Chr06              | 22211823                       | (T/C)       |
| 10588       | CakSNP10588    | <i>Kabuli</i>    | Ca_Kabuli_Chr06              | 22217158                       | (A/G)       |
| 10589       | CakSNP10589    | <i>Kabuli</i>    | Ca_Kabuli_Chr06              | 22217157                       | (T/G)       |
| 10590       | CakSNP10590    | <i>Kabuli</i>    | Ca_Kabuli_Chr06              | 22217107                       | (G/A)       |
| 10591       | CakSNP10591    | <i>Kabuli</i>    | Ca_Kabuli_Chr06              | 22225288                       | (T/G)       |
| 10592       | CakSNP10592    | <i>Kabuli</i>    | Ca_Kabuli_Chr06              | 22235449                       | (G/A)       |
| 10593       | CakSNP10593    | <i>Kabuli</i>    | Ca_Kabuli_Chr06              | 22235421                       | (T/A)       |
| 10594       | CakSNP10594    | <i>Kabuli</i>    | Ca_Kabuli_Chr06              | 22236475                       | (T/A)       |
| 10595       | CakSNP10595    | <i>Kabuli</i>    | Ca_Kabuli_Chr06              | 22252149                       | (G/A)       |
| 10596       | CakSNP10596    | <i>Kabuli</i>    | Ca_Kabuli_Chr06              | 22262999                       | (A/C)       |
| 10597       | CakSNP10597    | <i>Kabuli</i>    | Ca_Kabuli_Chr06              | 22263011                       | (T/C)       |
| 10598       | CakSNP10598    | <i>Kabuli</i>    | Ca_Kabuli_Chr06              | 22263388                       | (A/G)       |
| 10599       | CakSNP10599    | <i>Kabuli</i>    | Ca_Kabuli_Chr06              | 22263452                       | (A/T)       |
| 10600       | CakSNP10600    | <i>Kabuli</i>    | Ca_Kabuli_Chr06              | 22279906                       | (T/G)       |
| 10601       | CakSNP10601    | <i>Kabuli</i>    | Ca_Kabuli_Chr06              | 22287922                       | (C/T)       |

| <b>S.N.</b> | <b>SNP IDs</b> | <b>Cultivars</b> | <b>Chromosomes/scaffolds</b> | <b>Physical positions (bp)</b> | <b>SNPs</b> |
|-------------|----------------|------------------|------------------------------|--------------------------------|-------------|
| 10602       | CakSNP10602    | <i>Kabuli</i>    | Ca_Kabuli_Chr06              | 22334733                       | (C/T)       |
| 10603       | CakSNP10603    | <i>Kabuli</i>    | Ca_Kabuli_Chr06              | 22352976                       | (T/C)       |
| 10604       | CakSNP10604    | <i>Kabuli</i>    | Ca_Kabuli_Chr06              | 22370242                       | (C/T)       |
| 10605       | CakSNP10605    | <i>Kabuli</i>    | Ca_Kabuli_Chr06              | 22371908                       | (A/C)       |
| 10606       | CakSNP10606    | <i>Kabuli</i>    | Ca_Kabuli_Chr06              | 22446629                       | (G/A)       |
| 10607       | CakSNP10607    | <i>Kabuli</i>    | Ca_Kabuli_Chr06              | 22446621                       | (A/C)       |
| 10608       | CakSNP10608    | <i>Kabuli</i>    | Ca_Kabuli_Chr06              | 22446610                       | (G/A)       |
| 10609       | CakSNP10609    | <i>Kabuli</i>    | Ca_Kabuli_Chr06              | 22446570                       | (C/T)       |
| 10610       | CakSNP10610    | <i>Kabuli</i>    | Ca_Kabuli_Chr06              | 22446649                       | (C/T)       |
| 10611       | CakSNP10611    | <i>Kabuli</i>    | Ca_Kabuli_Chr06              | 22446644                       | (C/T)       |
| 10612       | CakSNP10612    | <i>Kabuli</i>    | Ca_Kabuli_Chr06              | 22482366                       | (A/C)       |
| 10613       | CakSNP10613    | <i>Kabuli</i>    | Ca_Kabuli_Chr06              | 22498553                       | (T/C)       |
| 10614       | CakSNP10614    | <i>Kabuli</i>    | Ca_Kabuli_Chr06              | 22498867                       | (T/C)       |
| 10615       | CakSNP10615    | <i>Kabuli</i>    | Ca_Kabuli_Chr06              | 22518747                       | (G/T)       |
| 10616       | CakSNP10616    | <i>Kabuli</i>    | Ca_Kabuli_Chr06              | 22879982                       | (C/T)       |
| 10617       | CakSNP10617    | <i>Kabuli</i>    | Ca_Kabuli_Chr06              | 22881176                       | (A/T)       |
| 10618       | CakSNP10618    | <i>Kabuli</i>    | Ca_Kabuli_Chr06              | 22933938                       | (T/A)       |
| 10619       | CakSNP10619    | <i>Kabuli</i>    | Ca_Kabuli_Chr06              | 22952185                       | (G/A)       |
| 10620       | CakSNP10620    | <i>Kabuli</i>    | Ca_Kabuli_Chr06              | 22952253                       | (C/T)       |
| 10621       | CakSNP10621    | <i>Kabuli</i>    | Ca_Kabuli_Chr06              | 22966001                       | (C/A)       |
| 10622       | CakSNP10622    | <i>Kabuli</i>    | Ca_Kabuli_Chr06              | 22986891                       | (T/C)       |
| 10623       | CakSNP10623    | <i>Kabuli</i>    | Ca_Kabuli_Chr06              | 22986869                       | (G/C)       |
| 10624       | CakSNP10624    | <i>Kabuli</i>    | Ca_Kabuli_Chr06              | 23014724                       | (T/A)       |
| 10625       | CakSNP10625    | <i>Kabuli</i>    | Ca_Kabuli_Chr06              | 23039165                       | (T/C)       |
| 10626       | CakSNP10626    | <i>Kabuli</i>    | Ca_Kabuli_Chr06              | 23039147                       | (G/A)       |
| 10627       | CakSNP10627    | <i>Kabuli</i>    | Ca_Kabuli_Chr06              | 23039145                       | (A/G)       |
| 10628       | CakSNP10628    | <i>Kabuli</i>    | Ca_Kabuli_Chr06              | 23039125                       | (G/A)       |
| 10629       | CakSNP10629    | <i>Kabuli</i>    | Ca_Kabuli_Chr06              | 23039097                       | (C/T)       |
| 10630       | CakSNP10630    | <i>Kabuli</i>    | Ca_Kabuli_Chr06              | 23046076                       | (C/T)       |
| 10631       | CakSNP10631    | <i>Kabuli</i>    | Ca_Kabuli_Chr06              | 23113706                       | (A/G)       |
| 10632       | CakSNP10632    | <i>Kabuli</i>    | Ca_Kabuli_Chr06              | 23129516                       | (A/G)       |
| 10633       | CakSNP10633    | <i>Kabuli</i>    | Ca_Kabuli_Chr06              | 23129504                       | (C/G)       |
| 10634       | CakSNP10634    | <i>Kabuli</i>    | Ca_Kabuli_Chr06              | 23145532                       | (T/A)       |
| 10635       | CakSNP10635    | <i>Kabuli</i>    | Ca_Kabuli_Chr06              | 23166355                       | (A/C)       |
| 10636       | CakSNP10636    | <i>Kabuli</i>    | Ca_Kabuli_Chr06              | 23253687                       | (G/A)       |
| 10637       | CakSNP10637    | <i>Kabuli</i>    | Ca_Kabuli_Chr06              | 23253973                       | (G/C)       |
| 10638       | CakSNP10638    | <i>Kabuli</i>    | Ca_Kabuli_Chr06              | 23254642                       | (A/G)       |
| 10639       | CakSNP10639    | <i>Kabuli</i>    | Ca_Kabuli_Chr06              | 23256848                       | (C/G)       |

| <b>S.N.</b> | <b>SNP IDs</b> | <b>Cultivars</b> | <b>Chromosomes/scaffolds</b> | <b>Physical positions (bp)</b> | <b>SNPs</b> |
|-------------|----------------|------------------|------------------------------|--------------------------------|-------------|
| 10640       | CakSNP10640    | <i>Kabuli</i>    | Ca_Kabuli_Chr06              | 23256891                       | (T/G)       |
| 10641       | CakSNP10641    | <i>Kabuli</i>    | Ca_Kabuli_Chr06              | 23380746                       | (G/A)       |
| 10642       | CakSNP10642    | <i>Kabuli</i>    | Ca_Kabuli_Chr06              | 23393426                       | (T/C)       |
| 10643       | CakSNP10643    | <i>Kabuli</i>    | Ca_Kabuli_Chr06              | 23393446                       | (A/G)       |
| 10644       | CakSNP10644    | <i>Kabuli</i>    | Ca_Kabuli_Chr06              | 23393469                       | (T/C)       |
| 10645       | CakSNP10645    | <i>Kabuli</i>    | Ca_Kabuli_Chr06              | 23393491                       | (T/G)       |
| 10646       | CakSNP10646    | <i>Kabuli</i>    | Ca_Kabuli_Chr06              | 23399103                       | (A/G)       |
| 10647       | CakSNP10647    | <i>Kabuli</i>    | Ca_Kabuli_Chr06              | 23424061                       | (T/G)       |
| 10648       | CakSNP10648    | <i>Kabuli</i>    | Ca_Kabuli_Chr06              | 23549220                       | (A/T)       |
| 10649       | CakSNP10649    | <i>Kabuli</i>    | Ca_Kabuli_Chr06              | 23638882                       | (A/G)       |
| 10650       | CakSNP10650    | <i>Kabuli</i>    | Ca_Kabuli_Chr06              | 23663204                       | (C/A)       |
| 10651       | CakSNP10651    | <i>Kabuli</i>    | Ca_Kabuli_Chr06              | 23663201                       | (T/C)       |
| 10652       | CakSNP10652    | <i>Kabuli</i>    | Ca_Kabuli_Chr06              | 23663180                       | (G/T)       |
| 10653       | CakSNP10653    | <i>Kabuli</i>    | Ca_Kabuli_Chr06              | 23688740                       | (C/T)       |
| 10654       | CakSNP10654    | <i>Kabuli</i>    | Ca_Kabuli_Chr06              | 23688723                       | (A/G)       |
| 10655       | CakSNP10655    | <i>Kabuli</i>    | Ca_Kabuli_Chr06              | 23691440                       | (A/C)       |
| 10656       | CakSNP10656    | <i>Kabuli</i>    | Ca_Kabuli_Chr06              | 23766943                       | (C/T)       |
| 10657       | CakSNP10657    | <i>Kabuli</i>    | Ca_Kabuli_Chr06              | 23768142                       | (A/T)       |
| 10658       | CakSNP10658    | <i>Kabuli</i>    | Ca_Kabuli_Chr06              | 23809120                       | (G/A)       |
| 10659       | CakSNP10659    | <i>Kabuli</i>    | Ca_Kabuli_Chr06              | 23890836                       | (A/G)       |
| 10660       | CakSNP10660    | <i>Kabuli</i>    | Ca_Kabuli_Chr06              | 23891065                       | (G/A)       |
| 10661       | CakSNP10661    | <i>Kabuli</i>    | Ca_Kabuli_Chr06              | 23916260                       | (A/G)       |
| 10662       | CakSNP10662    | <i>Kabuli</i>    | Ca_Kabuli_Chr06              | 23963812                       | (T/C)       |
| 10663       | CakSNP10663    | <i>Kabuli</i>    | Ca_Kabuli_Chr06              | 23973410                       | (G/A)       |
| 10664       | CakSNP10664    | <i>Kabuli</i>    | Ca_Kabuli_Chr06              | 24007185                       | (C/T)       |
| 10665       | CakSNP10665    | <i>Kabuli</i>    | Ca_Kabuli_Chr06              | 24007863                       | (T/C)       |
| 10666       | CakSNP10666    | <i>Kabuli</i>    | Ca_Kabuli_Chr06              | 24061578                       | (G/T)       |
| 10667       | CakSNP10667    | <i>Kabuli</i>    | Ca_Kabuli_Chr06              | 24085747                       | (G/T)       |
| 10668       | CakSNP10668    | <i>Kabuli</i>    | Ca_Kabuli_Chr06              | 24085795                       | (C/T)       |
| 10669       | CakSNP10669    | <i>Kabuli</i>    | Ca_Kabuli_Chr06              | 24085807                       | (A/T)       |
| 10670       | CakSNP10670    | <i>Kabuli</i>    | Ca_Kabuli_Chr06              | 24138357                       | (A/G)       |
| 10671       | CakSNP10671    | <i>Kabuli</i>    | Ca_Kabuli_Chr06              | 24138388                       | (T/C)       |
| 10672       | CakSNP10672    | <i>Kabuli</i>    | Ca_Kabuli_Chr06              | 24174940                       | (C/T)       |
| 10673       | CakSNP10673    | <i>Kabuli</i>    | Ca_Kabuli_Chr06              | 24260527                       | (T/C)       |
| 10674       | CakSNP10674    | <i>Kabuli</i>    | Ca_Kabuli_Chr06              | 24301508                       | (T/A)       |
| 10675       | CakSNP10675    | <i>Kabuli</i>    | Ca_Kabuli_Chr06              | 24302205                       | (A/G)       |
| 10676       | CakSNP10676    | <i>Kabuli</i>    | Ca_Kabuli_Chr06              | 24381949                       | (A/G)       |
| 10677       | CakSNP10677    | <i>Kabuli</i>    | Ca_Kabuli_Chr06              | 24381937                       | (G/A)       |

| <b>S.N.</b> | <b>SNP IDs</b> | <b>Cultivars</b> | <b>Chromosomes/scaffolds</b> | <b>Physical positions (bp)</b> | <b>SNPs</b> |
|-------------|----------------|------------------|------------------------------|--------------------------------|-------------|
| 10678       | CakSNP10678    | <i>Kabuli</i>    | Ca_Kabuli_Chr06              | 24403316                       | (G/T)       |
| 10679       | CakSNP10679    | <i>Kabuli</i>    | Ca_Kabuli_Chr06              | 24413675                       | (T/C)       |
| 10680       | CakSNP10680    | <i>Kabuli</i>    | Ca_Kabuli_Chr06              | 24413714                       | (G/A)       |
| 10681       | CakSNP10681    | <i>Kabuli</i>    | Ca_Kabuli_Chr06              | 24414512                       | (G/C)       |
| 10682       | CakSNP10682    | <i>Kabuli</i>    | Ca_Kabuli_Chr06              | 24454583                       | (C/T)       |
| 10683       | CakSNP10683    | <i>Kabuli</i>    | Ca_Kabuli_Chr06              | 24454557                       | (T/C)       |
| 10684       | CakSNP10684    | <i>Kabuli</i>    | Ca_Kabuli_Chr06              | 24516523                       | (A/T)       |
| 10685       | CakSNP10685    | <i>Kabuli</i>    | Ca_Kabuli_Chr06              | 24516528                       | (A/T)       |
| 10686       | CakSNP10686    | <i>Kabuli</i>    | Ca_Kabuli_Chr06              | 24516532                       | (C/T)       |
| 10687       | CakSNP10687    | <i>Kabuli</i>    | Ca_Kabuli_Chr06              | 24547086                       | (T/G)       |
| 10688       | CakSNP10688    | <i>Kabuli</i>    | Ca_Kabuli_Chr06              | 24644924                       | (T/G)       |
| 10689       | CakSNP10689    | <i>Kabuli</i>    | Ca_Kabuli_Chr06              | 24661895                       | (G/A)       |
| 10690       | CakSNP10690    | <i>Kabuli</i>    | Ca_Kabuli_Chr06              | 24661916                       | (C/T)       |
| 10691       | CakSNP10691    | <i>Kabuli</i>    | Ca_Kabuli_Chr06              | 24661937                       | (C/T)       |
| 10692       | CakSNP10692    | <i>Kabuli</i>    | Ca_Kabuli_Chr06              | 24661945                       | (T/A)       |
| 10693       | CakSNP10693    | <i>Kabuli</i>    | Ca_Kabuli_Chr06              | 24661986                       | (G/A)       |
| 10694       | CakSNP10694    | <i>Kabuli</i>    | Ca_Kabuli_Chr06              | 25575097                       | (T/C)       |
| 10695       | CakSNP10695    | <i>Kabuli</i>    | Ca_Kabuli_Chr06              | 25575078                       | (C/T)       |
| 10696       | CakSNP10696    | <i>Kabuli</i>    | Ca_Kabuli_Chr06              | 25575062                       | (G/A)       |
| 10697       | CakSNP10697    | <i>Kabuli</i>    | Ca_Kabuli_Chr06              | 25575045                       | (C/A)       |
| 10698       | CakSNP10698    | <i>Kabuli</i>    | Ca_Kabuli_Chr06              | 25604942                       | (C/A)       |
| 10699       | CakSNP10699    | <i>Kabuli</i>    | Ca_Kabuli_Chr06              | 25604936                       | (C/T)       |
| 10700       | CakSNP10700    | <i>Kabuli</i>    | Ca_Kabuli_Chr06              | 25604931                       | (C/A)       |
| 10701       | CakSNP10701    | <i>Kabuli</i>    | Ca_Kabuli_Chr06              | 25604922                       | (A/G)       |
| 10702       | CakSNP10702    | <i>Kabuli</i>    | Ca_Kabuli_Chr06              | 25604954                       | (C/T)       |
| 10703       | CakSNP10703    | <i>Kabuli</i>    | Ca_Kabuli_Chr06              | 25604962                       | (G/A)       |
| 10704       | CakSNP10704    | <i>Kabuli</i>    | Ca_Kabuli_Chr06              | 25604994                       | (T/C)       |
| 10705       | CakSNP10705    | <i>Kabuli</i>    | Ca_Kabuli_Chr06              | 25605006                       | (C/A)       |
| 10706       | CakSNP10706    | <i>Kabuli</i>    | Ca_Kabuli_Chr06              | 25605023                       | (C/A)       |
| 10707       | CakSNP10707    | <i>Kabuli</i>    | Ca_Kabuli_Chr06              | 25605022                       | (T/C)       |
| 10708       | CakSNP10708    | <i>Kabuli</i>    | Ca_Kabuli_Chr06              | 25850717                       | (C/T)       |
| 10709       | CakSNP10709    | <i>Kabuli</i>    | Ca_Kabuli_Chr06              | 25850725                       | (T/G)       |
| 10710       | CakSNP10710    | <i>Kabuli</i>    | Ca_Kabuli_Chr06              | 25850736                       | (C/T)       |
| 10711       | CakSNP10711    | <i>Kabuli</i>    | Ca_Kabuli_Chr06              | 25850760                       | (T/A)       |
| 10712       | CakSNP10712    | <i>Kabuli</i>    | Ca_Kabuli_Chr06              | 25850759                       | (C/A)       |
| 10713       | CakSNP10713    | <i>Kabuli</i>    | Ca_Kabuli_Chr06              | 25850783                       | (G/A)       |
| 10714       | CakSNP10714    | <i>Kabuli</i>    | Ca_Kabuli_Chr06              | 25850816                       | (C/A)       |
| 10715       | CakSNP10715    | <i>Kabuli</i>    | Ca_Kabuli_Chr06              | 25850813                       | (C/T)       |

| <b>S.N.</b> | <b>SNP IDs</b> | <b>Cultivars</b> | <b>Chromosomes/scaffolds</b> | <b>Physical positions (bp)</b> | <b>SNPs</b> |
|-------------|----------------|------------------|------------------------------|--------------------------------|-------------|
| 10716       | CakSNP10716    | <i>Kabuli</i>    | Ca_Kabuli_Chr06              | 25850866                       | (C/G)       |
| 10717       | CakSNP10717    | <i>Kabuli</i>    | Ca_Kabuli_Chr06              | 25850827                       | (C/T)       |
| 10718       | CakSNP10718    | <i>Kabuli</i>    | Ca_Kabuli_Chr06              | 26349363                       | (C/A)       |
| 10719       | CakSNP10719    | <i>Kabuli</i>    | Ca_Kabuli_Chr06              | 26349321                       | (C/T)       |
| 10720       | CakSNP10720    | <i>Kabuli</i>    | Ca_Kabuli_Chr06              | 26349434                       | (G/A)       |
| 10721       | CakSNP10721    | <i>Kabuli</i>    | Ca_Kabuli_Chr06              | 26349451                       | (T/C)       |
| 10722       | CakSNP10722    | <i>Kabuli</i>    | Ca_Kabuli_Chr06              | 26353512                       | (C/T)       |
| 10723       | CakSNP10723    | <i>Kabuli</i>    | Ca_Kabuli_Chr06              | 26353740                       | (G/C)       |
| 10724       | CakSNP10724    | <i>Kabuli</i>    | Ca_Kabuli_Chr06              | 26357149                       | (C/G)       |
| 10725       | CakSNP10725    | <i>Kabuli</i>    | Ca_Kabuli_Chr06              | 26360367                       | (C/A)       |
| 10726       | CakSNP10726    | <i>Kabuli</i>    | Ca_Kabuli_Chr06              | 26385448                       | (A/G)       |
| 10727       | CakSNP10727    | <i>Kabuli</i>    | Ca_Kabuli_Chr06              | 26385444                       | (C/T)       |
| 10728       | CakSNP10728    | <i>Kabuli</i>    | Ca_Kabuli_Chr06              | 26385432                       | (T/C)       |
| 10729       | CakSNP10729    | <i>Kabuli</i>    | Ca_Kabuli_Chr06              | 26426239                       | (C/A)       |
| 10730       | CakSNP10730    | <i>Kabuli</i>    | Ca_Kabuli_Chr06              | 26426252                       | (A/G)       |
| 10731       | CakSNP10731    | <i>Kabuli</i>    | Ca_Kabuli_Chr06              | 26426283                       | (G/A)       |
| 10732       | CakSNP10732    | <i>Kabuli</i>    | Ca_Kabuli_Chr06              | 26527086                       | (T/C)       |
| 10733       | CakSNP10733    | <i>Kabuli</i>    | Ca_Kabuli_Chr06              | 26527111                       | (G/T)       |
| 10734       | CakSNP10734    | <i>Kabuli</i>    | Ca_Kabuli_Chr06              | 26527161                       | (C/G)       |
| 10735       | CakSNP10735    | <i>Kabuli</i>    | Ca_Kabuli_Chr06              | 26527416                       | (C/T)       |
| 10736       | CakSNP10736    | <i>Kabuli</i>    | Ca_Kabuli_Chr06              | 26549168                       | (T/G)       |
| 10737       | CakSNP10737    | <i>Kabuli</i>    | Ca_Kabuli_Chr06              | 26549181                       | (C/T)       |
| 10738       | CakSNP10738    | <i>Kabuli</i>    | Ca_Kabuli_Chr06              | 26551390                       | (C/T)       |
| 10739       | CakSNP10739    | <i>Kabuli</i>    | Ca_Kabuli_Chr06              | 26551703                       | (T/G)       |
| 10740       | CakSNP10740    | <i>Kabuli</i>    | Ca_Kabuli_Chr06              | 26567360                       | (A/G)       |
| 10741       | CakSNP10741    | <i>Kabuli</i>    | Ca_Kabuli_Chr06              | 26656016                       | (T/C)       |
| 10742       | CakSNP10742    | <i>Kabuli</i>    | Ca_Kabuli_Chr06              | 26698265                       | (A/C)       |
| 10743       | CakSNP10743    | <i>Kabuli</i>    | Ca_Kabuli_Chr06              | 26703130                       | (A/G)       |
| 10744       | CakSNP10744    | <i>Kabuli</i>    | Ca_Kabuli_Chr06              | 26703132                       | (T/C)       |
| 10745       | CakSNP10745    | <i>Kabuli</i>    | Ca_Kabuli_Chr06              | 26767389                       | (T/C)       |
| 10746       | CakSNP10746    | <i>Kabuli</i>    | Ca_Kabuli_Chr06              | 26769087                       | (C/A)       |
| 10747       | CakSNP10747    | <i>Kabuli</i>    | Ca_Kabuli_Chr06              | 26928255                       | (T/C)       |
| 10748       | CakSNP10748    | <i>Kabuli</i>    | Ca_Kabuli_Chr06              | 27053217                       | (A/G)       |
| 10749       | CakSNP10749    | <i>Kabuli</i>    | Ca_Kabuli_Chr06              | 27053288                       | (G/C)       |
| 10750       | CakSNP10750    | <i>Kabuli</i>    | Ca_Kabuli_Chr06              | 27139791                       | (T/C)       |
| 10751       | CakSNP10751    | <i>Kabuli</i>    | Ca_Kabuli_Chr06              | 27139816                       | (T/C)       |
| 10752       | CakSNP10752    | <i>Kabuli</i>    | Ca_Kabuli_Chr06              | 27190671                       | (G/A)       |
| 10753       | CakSNP10753    | <i>Kabuli</i>    | Ca_Kabuli_Chr06              | 27192557                       | (C/T)       |

| <b>S.N.</b> | <b>SNP IDs</b> | <b>Cultivars</b> | <b>Chromosomes/scaffolds</b> | <b>Physical positions (bp)</b> | <b>SNPs</b> |
|-------------|----------------|------------------|------------------------------|--------------------------------|-------------|
| 10754       | CakSNP10754    | <i>Kabuli</i>    | Ca_Kabuli_Chr06              | 27310342                       | (A/T)       |
| 10755       | CakSNP10755    | <i>Kabuli</i>    | Ca_Kabuli_Chr06              | 27310341                       | (G/T)       |
| 10756       | CakSNP10756    | <i>Kabuli</i>    | Ca_Kabuli_Chr06              | 27310336                       | (A/T)       |
| 10757       | CakSNP10757    | <i>Kabuli</i>    | Ca_Kabuli_Chr06              | 27310333                       | (C/T)       |
| 10758       | CakSNP10758    | <i>Kabuli</i>    | Ca_Kabuli_Chr06              | 27310328                       | (T/A)       |
| 10759       | CakSNP10759    | <i>Kabuli</i>    | Ca_Kabuli_Chr06              | 27310327                       | (A/T)       |
| 10760       | CakSNP10760    | <i>Kabuli</i>    | Ca_Kabuli_Chr06              | 27310325                       | (G/T)       |
| 10761       | CakSNP10761    | <i>Kabuli</i>    | Ca_Kabuli_Chr06              | 27310315                       | (C/T)       |
| 10762       | CakSNP10762    | <i>Kabuli</i>    | Ca_Kabuli_Chr06              | 27326420                       | (G/A)       |
| 10763       | CakSNP10763    | <i>Kabuli</i>    | Ca_Kabuli_Chr06              | 27326978                       | (C/T)       |
| 10764       | CakSNP10764    | <i>Kabuli</i>    | Ca_Kabuli_Chr06              | 27330059                       | (T/C)       |
| 10765       | CakSNP10765    | <i>Kabuli</i>    | Ca_Kabuli_Chr06              | 27330159                       | (C/T)       |
| 10766       | CakSNP10766    | <i>Kabuli</i>    | Ca_Kabuli_Chr06              | 27331165                       | (T/C)       |
| 10767       | CakSNP10767    | <i>Kabuli</i>    | Ca_Kabuli_Chr06              | 27331318                       | (A/C)       |
| 10768       | CakSNP10768    | <i>Kabuli</i>    | Ca_Kabuli_Chr06              | 27364381                       | (A/G)       |
| 10769       | CakSNP10769    | <i>Kabuli</i>    | Ca_Kabuli_Chr06              | 27364395                       | (C/T)       |
| 10770       | CakSNP10770    | <i>Kabuli</i>    | Ca_Kabuli_Chr06              | 27364402                       | (T/A)       |
| 10771       | CakSNP10771    | <i>Kabuli</i>    | Ca_Kabuli_Chr06              | 27364428                       | (G/T)       |
| 10772       | CakSNP10772    | <i>Kabuli</i>    | Ca_Kabuli_Chr06              | 27364452                       | (A/T)       |
| 10773       | CakSNP10773    | <i>Kabuli</i>    | Ca_Kabuli_Chr06              | 27383746                       | (A/T)       |
| 10774       | CakSNP10774    | <i>Kabuli</i>    | Ca_Kabuli_Chr06              | 27383745                       | (G/T)       |
| 10775       | CakSNP10775    | <i>Kabuli</i>    | Ca_Kabuli_Chr06              | 27383744                       | (G/T)       |
| 10776       | CakSNP10776    | <i>Kabuli</i>    | Ca_Kabuli_Chr06              | 27383718                       | (C/T)       |
| 10777       | CakSNP10777    | <i>Kabuli</i>    | Ca_Kabuli_Chr06              | 27515184                       | (C/T)       |
| 10778       | CakSNP10778    | <i>Kabuli</i>    | Ca_Kabuli_Chr06              | 27515293                       | (G/A)       |
| 10779       | CakSNP10779    | <i>Kabuli</i>    | Ca_Kabuli_Chr06              | 27537433                       | (A/G)       |
| 10780       | CakSNP10780    | <i>Kabuli</i>    | Ca_Kabuli_Chr06              | 27558154                       | (A/G)       |
| 10781       | CakSNP10781    | <i>Kabuli</i>    | Ca_Kabuli_Chr06              | 27578968                       | (A/G)       |
| 10782       | CakSNP10782    | <i>Kabuli</i>    | Ca_Kabuli_Chr06              | 27592117                       | (G/T)       |
| 10783       | CakSNP10783    | <i>Kabuli</i>    | Ca_Kabuli_Chr06              | 27592070                       | (A/G)       |
| 10784       | CakSNP10784    | <i>Kabuli</i>    | Ca_Kabuli_Chr06              | 27606193                       | (A/C)       |
| 10785       | CakSNP10785    | <i>Kabuli</i>    | Ca_Kabuli_Chr06              | 27606210                       | (C/T)       |
| 10786       | CakSNP10786    | <i>Kabuli</i>    | Ca_Kabuli_Chr06              | 27622037                       | (A/C)       |
| 10787       | CakSNP10787    | <i>Kabuli</i>    | Ca_Kabuli_Chr06              | 27622045                       | (A/G)       |
| 10788       | CakSNP10788    | <i>Kabuli</i>    | Ca_Kabuli_Chr06              | 27622053                       | (A/G)       |
| 10789       | CakSNP10789    | <i>Kabuli</i>    | Ca_Kabuli_Chr06              | 27636256                       | (A/G)       |
| 10790       | CakSNP10790    | <i>Kabuli</i>    | Ca_Kabuli_Chr06              | 27655605                       | (A/G)       |
| 10791       | CakSNP10791    | <i>Kabuli</i>    | Ca_Kabuli_Chr06              | 27660980                       | (C/T)       |

| <b>S.N.</b> | <b>SNP IDs</b> | <b>Cultivars</b> | <b>Chromosomes/scaffolds</b> | <b>Physical positions (bp)</b> | <b>SNPs</b> |
|-------------|----------------|------------------|------------------------------|--------------------------------|-------------|
| 10792       | CakSNP10792    | <i>Kabuli</i>    | Ca_Kabuli_Chr06              | 27660971                       | (T/C)       |
| 10793       | CakSNP10793    | <i>Kabuli</i>    | Ca_Kabuli_Chr06              | 27661951                       | (C/T)       |
| 10794       | CakSNP10794    | <i>Kabuli</i>    | Ca_Kabuli_Chr06              | 27662026                       | (C/T)       |
| 10795       | CakSNP10795    | <i>Kabuli</i>    | Ca_Kabuli_Chr06              | 27710531                       | (T/G)       |
| 10796       | CakSNP10796    | <i>Kabuli</i>    | Ca_Kabuli_Chr06              | 27710547                       | (A/T)       |
| 10797       | CakSNP10797    | <i>Kabuli</i>    | Ca_Kabuli_Chr06              | 27842297                       | (G/A)       |
| 10798       | CakSNP10798    | <i>Kabuli</i>    | Ca_Kabuli_Chr06              | 27865048                       | (C/T)       |
| 10799       | CakSNP10799    | <i>Kabuli</i>    | Ca_Kabuli_Chr06              | 27865046                       | (G/A)       |
| 10800       | CakSNP10800    | <i>Kabuli</i>    | Ca_Kabuli_Chr06              | 27864997                       | (C/A)       |
| 10801       | CakSNP10801    | <i>Kabuli</i>    | Ca_Kabuli_Chr06              | 27986719                       | (A/G)       |
| 10802       | CakSNP10802    | <i>Kabuli</i>    | Ca_Kabuli_Chr06              | 28021899                       | (C/T)       |
| 10803       | CakSNP10803    | <i>Kabuli</i>    | Ca_Kabuli_Chr06              | 28044830                       | (C/A)       |
| 10804       | CakSNP10804    | <i>Kabuli</i>    | Ca_Kabuli_Chr06              | 28052463                       | (T/G)       |
| 10805       | CakSNP10805    | <i>Kabuli</i>    | Ca_Kabuli_Chr06              | 28074393                       | (T/C)       |
| 10806       | CakSNP10806    | <i>Kabuli</i>    | Ca_Kabuli_Chr06              | 28076323                       | (T/A)       |
| 10807       | CakSNP10807    | <i>Kabuli</i>    | Ca_Kabuli_Chr06              | 28076364                       | (T/G)       |
| 10808       | CakSNP10808    | <i>Kabuli</i>    | Ca_Kabuli_Chr06              | 28076436                       | (A/T)       |
| 10809       | CakSNP10809    | <i>Kabuli</i>    | Ca_Kabuli_Chr06              | 28177397                       | (A/C)       |
| 10810       | CakSNP10810    | <i>Kabuli</i>    | Ca_Kabuli_Chr06              | 28325392                       | (C/T)       |
| 10811       | CakSNP10811    | <i>Kabuli</i>    | Ca_Kabuli_Chr06              | 28372130                       | (C/T)       |
| 10812       | CakSNP10812    | <i>Kabuli</i>    | Ca_Kabuli_Chr06              | 28574699                       | (T/C)       |
| 10813       | CakSNP10813    | <i>Kabuli</i>    | Ca_Kabuli_Chr06              | 28575509                       | (T/C)       |
| 10814       | CakSNP10814    | <i>Kabuli</i>    | Ca_Kabuli_Chr06              | 28575491                       | (G/A)       |
| 10815       | CakSNP10815    | <i>Kabuli</i>    | Ca_Kabuli_Chr06              | 28615404                       | (G/T)       |
| 10816       | CakSNP10816    | <i>Kabuli</i>    | Ca_Kabuli_Chr06              | 28615475                       | (A/G)       |
| 10817       | CakSNP10817    | <i>Kabuli</i>    | Ca_Kabuli_Chr06              | 28650056                       | (A/G)       |
| 10818       | CakSNP10818    | <i>Kabuli</i>    | Ca_Kabuli_Chr06              | 28727478                       | (T/C)       |
| 10819       | CakSNP10819    | <i>Kabuli</i>    | Ca_Kabuli_Chr06              | 28728293                       | (A/C)       |
| 10820       | CakSNP10820    | <i>Kabuli</i>    | Ca_Kabuli_Chr06              | 28755298                       | (T/A)       |
| 10821       | CakSNP10821    | <i>Kabuli</i>    | Ca_Kabuli_Chr06              | 28757208                       | (C/A)       |
| 10822       | CakSNP10822    | <i>Kabuli</i>    | Ca_Kabuli_Chr06              | 28757204                       | (G/A)       |
| 10823       | CakSNP10823    | <i>Kabuli</i>    | Ca_Kabuli_Chr06              | 28757139                       | (C/A)       |
| 10824       | CakSNP10824    | <i>Kabuli</i>    | Ca_Kabuli_Chr06              | 28887176                       | (G/A)       |
| 10825       | CakSNP10825    | <i>Kabuli</i>    | Ca_Kabuli_Chr06              | 28887188                       | (G/T)       |
| 10826       | CakSNP10826    | <i>Kabuli</i>    | Ca_Kabuli_Chr06              | 28887201                       | (A/G)       |
| 10827       | CakSNP10827    | <i>Kabuli</i>    | Ca_Kabuli_Chr06              | 28887212                       | (C/T)       |
| 10828       | CakSNP10828    | <i>Kabuli</i>    | Ca_Kabuli_Chr06              | 28892743                       | (G/C)       |
| 10829       | CakSNP10829    | <i>Kabuli</i>    | Ca_Kabuli_Chr06              | 28893411                       | (C/T)       |

| <b>S.N.</b> | <b>SNP IDs</b> | <b>Cultivars</b> | <b>Chromosomes/scaffolds</b> | <b>Physical positions (bp)</b> | <b>SNPs</b> |
|-------------|----------------|------------------|------------------------------|--------------------------------|-------------|
| 10830       | CakSNP10830    | <i>Kabuli</i>    | Ca_Kabuli_Chr06              | 28917705                       | (T/A)       |
| 10831       | CakSNP10831    | <i>Kabuli</i>    | Ca_Kabuli_Chr06              | 28947529                       | (A/C)       |
| 10832       | CakSNP10832    | <i>Kabuli</i>    | Ca_Kabuli_Chr06              | 28990518                       | (A/G)       |
| 10833       | CakSNP10833    | <i>Kabuli</i>    | Ca_Kabuli_Chr06              | 29085558                       | (T/C)       |
| 10834       | CakSNP10834    | <i>Kabuli</i>    | Ca_Kabuli_Chr06              | 29163667                       | (C/A)       |
| 10835       | CakSNP10835    | <i>Kabuli</i>    | Ca_Kabuli_Chr06              | 29163714                       | (G/C)       |
| 10836       | CakSNP10836    | <i>Kabuli</i>    | Ca_Kabuli_Chr06              | 29163699                       | (T/A)       |
| 10837       | CakSNP10837    | <i>Kabuli</i>    | Ca_Kabuli_Chr06              | 29163642                       | (G/A)       |
| 10838       | CakSNP10838    | <i>Kabuli</i>    | Ca_Kabuli_Chr06              | 29163640                       | (A/C)       |
| 10839       | CakSNP10839    | <i>Kabuli</i>    | Ca_Kabuli_Chr06              | 29203129                       | (C/G)       |
| 10840       | CakSNP10840    | <i>Kabuli</i>    | Ca_Kabuli_Chr06              | 29203201                       | (G/C)       |
| 10841       | CakSNP10841    | <i>Kabuli</i>    | Ca_Kabuli_Chr06              | 29203210                       | (T/C)       |
| 10842       | CakSNP10842    | <i>Kabuli</i>    | Ca_Kabuli_Chr06              | 29205260                       | (A/G)       |
| 10843       | CakSNP10843    | <i>Kabuli</i>    | Ca_Kabuli_Chr06              | 29205940                       | (A/G)       |
| 10844       | CakSNP10844    | <i>Kabuli</i>    | Ca_Kabuli_Chr06              | 29206008                       | (A/G)       |
| 10845       | CakSNP10845    | <i>Kabuli</i>    | Ca_Kabuli_Chr06              | 29307254                       | (A/G)       |
| 10846       | CakSNP10846    | <i>Kabuli</i>    | Ca_Kabuli_Chr06              | 29495856                       | (C/T)       |
| 10847       | CakSNP10847    | <i>Kabuli</i>    | Ca_Kabuli_Chr06              | 29934610                       | (A/T)       |
| 10848       | CakSNP10848    | <i>Kabuli</i>    | Ca_Kabuli_Chr06              | 30127756                       | (T/G)       |
| 10849       | CakSNP10849    | <i>Kabuli</i>    | Ca_Kabuli_Chr06              | 30257217                       | (C/T)       |
| 10850       | CakSNP10850    | <i>Kabuli</i>    | Ca_Kabuli_Chr06              | 30257284                       | (A/C)       |
| 10851       | CakSNP10851    | <i>Kabuli</i>    | Ca_Kabuli_Chr06              | 30567073                       | (G/A)       |
| 10852       | CakSNP10852    | <i>Kabuli</i>    | Ca_Kabuli_Chr06              | 30676031                       | (G/T)       |
| 10853       | CakSNP10853    | <i>Kabuli</i>    | Ca_Kabuli_Chr06              | 30676320                       | (T/C)       |
| 10854       | CakSNP10854    | <i>Kabuli</i>    | Ca_Kabuli_Chr06              | 30676248                       | (C/T)       |
| 10855       | CakSNP10855    | <i>Kabuli</i>    | Ca_Kabuli_Chr06              | 30761620                       | (C/T)       |
| 10856       | CakSNP10856    | <i>Kabuli</i>    | Ca_Kabuli_Chr06              | 30761641                       | (G/T)       |
| 10857       | CakSNP10857    | <i>Kabuli</i>    | Ca_Kabuli_Chr06              | 30913932                       | (T/C)       |
| 10858       | CakSNP10858    | <i>Kabuli</i>    | Ca_Kabuli_Chr06              | 30926084                       | (G/A)       |
| 10859       | CakSNP10859    | <i>Kabuli</i>    | Ca_Kabuli_Chr06              | 30927221                       | (C/G)       |
| 10860       | CakSNP10860    | <i>Kabuli</i>    | Ca_Kabuli_Chr06              | 31011743                       | (A/G)       |
| 10861       | CakSNP10861    | <i>Kabuli</i>    | Ca_Kabuli_Chr06              | 31024728                       | (A/T)       |
| 10862       | CakSNP10862    | <i>Kabuli</i>    | Ca_Kabuli_Chr06              | 31025560                       | (C/G)       |
| 10863       | CakSNP10863    | <i>Kabuli</i>    | Ca_Kabuli_Chr06              | 31038808                       | (C/T)       |
| 10864       | CakSNP10864    | <i>Kabuli</i>    | Ca_Kabuli_Chr06              | 31048949                       | (T/C)       |
| 10865       | CakSNP10865    | <i>Kabuli</i>    | Ca_Kabuli_Chr06              | 31057806                       | (C/T)       |
| 10866       | CakSNP10866    | <i>Kabuli</i>    | Ca_Kabuli_Chr06              | 31068678                       | (G/A)       |
| 10867       | CakSNP10867    | <i>Kabuli</i>    | Ca_Kabuli_Chr06              | 31324962                       | (A/C)       |



| <b>S.N.</b> | <b>SNP IDs</b> | <b>Cultivars</b> | <b>Chromosomes/scaffolds</b> | <b>Physical positions (bp)</b> | <b>SNPs</b> |
|-------------|----------------|------------------|------------------------------|--------------------------------|-------------|
| 10868       | CakSNP10868    | <i>Kabuli</i>    | Ca_Kabuli_Chr06              | 31324976                       | (A/G)       |
| 10869       | CakSNP10869    | <i>Kabuli</i>    | Ca_Kabuli_Chr06              | 31408895                       | (G/T)       |
| 10870       | CakSNP10870    | <i>Kabuli</i>    | Ca_Kabuli_Chr06              | 31408969                       | (C/T)       |
| 10871       | CakSNP10871    | <i>Kabuli</i>    | Ca_Kabuli_Chr06              | 31495897                       | (C/A)       |
| 10872       | CakSNP10872    | <i>Kabuli</i>    | Ca_Kabuli_Chr06              | 31495903                       | (A/G)       |
| 10873       | CakSNP10873    | <i>Kabuli</i>    | Ca_Kabuli_Chr06              | 31592707                       | (A/C)       |
| 10874       | CakSNP10874    | <i>Kabuli</i>    | Ca_Kabuli_Chr06              | 31595142                       | (A/C)       |
| 10875       | CakSNP10875    | <i>Kabuli</i>    | Ca_Kabuli_Chr06              | 31595136                       | (A/T)       |
| 10876       | CakSNP10876    | <i>Kabuli</i>    | Ca_Kabuli_Chr06              | 31895214                       | (G/C)       |
| 10877       | CakSNP10877    | <i>Kabuli</i>    | Ca_Kabuli_Chr06              | 31895264                       | (C/T)       |
| 10878       | CakSNP10878    | <i>Kabuli</i>    | Ca_Kabuli_Chr06              | 31900781                       | (T/G)       |
| 10879       | CakSNP10879    | <i>Kabuli</i>    | Ca_Kabuli_Chr06              | 31900785                       | (T/G)       |
| 10880       | CakSNP10880    | <i>Kabuli</i>    | Ca_Kabuli_Chr06              | 31900790                       | (A/C)       |
| 10881       | CakSNP10881    | <i>Kabuli</i>    | Ca_Kabuli_Chr06              | 31966982                       | (C/T)       |
| 10882       | CakSNP10882    | <i>Kabuli</i>    | Ca_Kabuli_Chr06              | 31967089                       | (T/G)       |
| 10883       | CakSNP10883    | <i>Kabuli</i>    | Ca_Kabuli_Chr06              | 31967106                       | (G/A)       |
| 10884       | CakSNP10884    | <i>Kabuli</i>    | Ca_Kabuli_Chr06              | 31967109                       | (T/C)       |
| 10885       | CakSNP10885    | <i>Kabuli</i>    | Ca_Kabuli_Chr06              | 31967144                       | (T/C)       |
| 10886       | CakSNP10886    | <i>Kabuli</i>    | Ca_Kabuli_Chr06              | 31967201                       | (C/T)       |
| 10887       | CakSNP10887    | <i>Kabuli</i>    | Ca_Kabuli_Chr06              | 31967195                       | (G/C)       |
| 10888       | CakSNP10888    | <i>Kabuli</i>    | Ca_Kabuli_Chr06              | 31992907                       | (A/G)       |
| 10889       | CakSNP10889    | <i>Kabuli</i>    | Ca_Kabuli_Chr06              | 32035882                       | (C/T)       |
| 10890       | CakSNP10890    | <i>Kabuli</i>    | Ca_Kabuli_Chr06              | 32036033                       | (G/A)       |
| 10891       | CakSNP10891    | <i>Kabuli</i>    | Ca_Kabuli_Chr06              | 32035976                       | (T/C)       |
| 10892       | CakSNP10892    | <i>Kabuli</i>    | Ca_Kabuli_Chr06              | 32140428                       | (C/A)       |
| 10893       | CakSNP10893    | <i>Kabuli</i>    | Ca_Kabuli_Chr06              | 32140429                       | (G/T)       |
| 10894       | CakSNP10894    | <i>Kabuli</i>    | Ca_Kabuli_Chr06              | 32262807                       | (T/C)       |
| 10895       | CakSNP10895    | <i>Kabuli</i>    | Ca_Kabuli_Chr06              | 32262855                       | (C/T)       |
| 10896       | CakSNP10896    | <i>Kabuli</i>    | Ca_Kabuli_Chr06              | 32328468                       | (T/C)       |
| 10897       | CakSNP10897    | <i>Kabuli</i>    | Ca_Kabuli_Chr06              | 32717450                       | (G/A)       |
| 10898       | CakSNP10898    | <i>Kabuli</i>    | Ca_Kabuli_Chr06              | 32717665                       | (C/A)       |
| 10899       | CakSNP10899    | <i>Kabuli</i>    | Ca_Kabuli_Chr06              | 32825567                       | (C/A)       |
| 10900       | CakSNP10900    | <i>Kabuli</i>    | Ca_Kabuli_Chr06              | 32825561                       | (C/T)       |
| 10901       | CakSNP10901    | <i>Kabuli</i>    | Ca_Kabuli_Chr06              | 32825547                       | (A/G)       |
| 10902       | CakSNP10902    | <i>Kabuli</i>    | Ca_Kabuli_Chr06              | 32825579                       | (C/T)       |
| 10903       | CakSNP10903    | <i>Kabuli</i>    | Ca_Kabuli_Chr06              | 32825587                       | (G/A)       |
| 10904       | CakSNP10904    | <i>Kabuli</i>    | Ca_Kabuli_Chr06              | 32825612                       | (G/A)       |
| 10905       | CakSNP10905    | <i>Kabuli</i>    | Ca_Kabuli_Chr06              | 32825619                       | (T/C)       |

| <b>S.N.</b> | <b>SNP IDs</b> | <b>Cultivars</b> | <b>Chromosomes/scaffolds</b> | <b>Physical positions (bp)</b> | <b>SNPs</b> |
|-------------|----------------|------------------|------------------------------|--------------------------------|-------------|
| 10906       | CakSNP10906    | <i>Kabuli</i>    | Ca_Kabuli_Chr06              | 32825631                       | (C/A)       |
| 10907       | CakSNP10907    | <i>Kabuli</i>    | Ca_Kabuli_Chr06              | 32914927                       | (C/G)       |
| 10908       | CakSNP10908    | <i>Kabuli</i>    | Ca_Kabuli_Chr06              | 33502994                       | (C/A)       |
| 10909       | CakSNP10909    | <i>Kabuli</i>    | Ca_Kabuli_Chr06              | 33502997                       | (T/A)       |
| 10910       | CakSNP10910    | <i>Kabuli</i>    | Ca_Kabuli_Chr06              | 33503007                       | (T/C)       |
| 10911       | CakSNP10911    | <i>Kabuli</i>    | Ca_Kabuli_Chr06              | 33503014                       | (G/T)       |
| 10912       | CakSNP10912    | <i>Kabuli</i>    | Ca_Kabuli_Chr06              | 33503020                       | (G/A)       |
| 10913       | CakSNP10913    | <i>Kabuli</i>    | Ca_Kabuli_Chr06              | 33503032                       | (A/C)       |
| 10914       | CakSNP10914    | <i>Kabuli</i>    | Ca_Kabuli_Chr06              | 33503037                       | (A/T)       |
| 10915       | CakSNP10915    | <i>Kabuli</i>    | Ca_Kabuli_Chr06              | 33503051                       | (G/C)       |
| 10916       | CakSNP10916    | <i>Kabuli</i>    | Ca_Kabuli_Chr06              | 33503063                       | (C/G)       |
| 10917       | CakSNP10917    | <i>Kabuli</i>    | Ca_Kabuli_Chr06              | 33503065                       | (C/A)       |
| 10918       | CakSNP10918    | <i>Kabuli</i>    | Ca_Kabuli_Chr06              | 33503071                       | (A/G)       |
| 10919       | CakSNP10919    | <i>Kabuli</i>    | Ca_Kabuli_Chr06              | 33598926                       | (G/A)       |
| 10920       | CakSNP10920    | <i>Kabuli</i>    | Ca_Kabuli_Chr06              | 33704792                       | (C/T)       |
| 10921       | CakSNP10921    | <i>Kabuli</i>    | Ca_Kabuli_Chr06              | 33704807                       | (C/A)       |
| 10922       | CakSNP10922    | <i>Kabuli</i>    | Ca_Kabuli_Chr06              | 33704839                       | (C/T)       |
| 10923       | CakSNP10923    | <i>Kabuli</i>    | Ca_Kabuli_Chr06              | 33704782                       | (C/T)       |
| 10924       | CakSNP10924    | <i>Kabuli</i>    | Ca_Kabuli_Chr06              | 33733259                       | (A/G)       |
| 10925       | CakSNP10925    | <i>Kabuli</i>    | Ca_Kabuli_Chr06              | 34235650                       | (T/C)       |
| 10926       | CakSNP10926    | <i>Kabuli</i>    | Ca_Kabuli_Chr06              | 34407309                       | (T/C)       |
| 10927       | CakSNP10927    | <i>Kabuli</i>    | Ca_Kabuli_Chr06              | 34481266                       | (A/G)       |
| 10928       | CakSNP10928    | <i>Kabuli</i>    | Ca_Kabuli_Chr06              | 34481256                       | (C/T)       |
| 10929       | CakSNP10929    | <i>Kabuli</i>    | Ca_Kabuli_Chr06              | 34535695                       | (T/C)       |
| 10930       | CakSNP10930    | <i>Kabuli</i>    | Ca_Kabuli_Chr06              | 34535983                       | (T/C)       |
| 10931       | CakSNP10931    | <i>Kabuli</i>    | Ca_Kabuli_Chr06              | 34596792                       | (A/G)       |
| 10932       | CakSNP10932    | <i>Kabuli</i>    | Ca_Kabuli_Chr06              | 34634028                       | (T/A)       |
| 10933       | CakSNP10933    | <i>Kabuli</i>    | Ca_Kabuli_Chr06              | 34744433                       | (A/G)       |
| 10934       | CakSNP10934    | <i>Kabuli</i>    | Ca_Kabuli_Chr06              | 34744438                       | (T/G)       |
| 10935       | CakSNP10935    | <i>Kabuli</i>    | Ca_Kabuli_Chr06              | 34744681                       | (T/G)       |
| 10936       | CakSNP10936    | <i>Kabuli</i>    | Ca_Kabuli_Chr06              | 34744665                       | (G/A)       |
| 10937       | CakSNP10937    | <i>Kabuli</i>    | Ca_Kabuli_Chr06              | 34773476                       | (T/A)       |
| 10938       | CakSNP10938    | <i>Kabuli</i>    | Ca_Kabuli_Chr06              | 34793312                       | (T/G)       |
| 10939       | CakSNP10939    | <i>Kabuli</i>    | Ca_Kabuli_Chr06              | 34974503                       | (C/G)       |
| 10940       | CakSNP10940    | <i>Kabuli</i>    | Ca_Kabuli_Chr06              | 35126227                       | (C/T)       |
| 10941       | CakSNP10941    | <i>Kabuli</i>    | Ca_Kabuli_Chr06              | 35126273                       | (T/C)       |
| 10942       | CakSNP10942    | <i>Kabuli</i>    | Ca_Kabuli_Chr06              | 35126389                       | (G/T)       |
| 10943       | CakSNP10943    | <i>Kabuli</i>    | Ca_Kabuli_Chr06              | 35129588                       | (G/A)       |

| <b>S.N.</b> | <b>SNP IDs</b> | <b>Cultivars</b> | <b>Chromosomes/scaffolds</b> | <b>Physical positions (bp)</b> | <b>SNPs</b> |
|-------------|----------------|------------------|------------------------------|--------------------------------|-------------|
| 10944       | CakSNP10944    | <i>Kabuli</i>    | Ca_Kabuli_Chr06              | 35596037                       | (C/A)       |
| 10945       | CakSNP10945    | <i>Kabuli</i>    | Ca_Kabuli_Chr06              | 35596048                       | (G/A)       |
| 10946       | CakSNP10946    | <i>Kabuli</i>    | Ca_Kabuli_Chr06              | 35596064                       | (T/C)       |
| 10947       | CakSNP10947    | <i>Kabuli</i>    | Ca_Kabuli_Chr06              | 35596070                       | (G/A)       |
| 10948       | CakSNP10948    | <i>Kabuli</i>    | Ca_Kabuli_Chr06              | 35596161                       | (C/T)       |
| 10949       | CakSNP10949    | <i>Kabuli</i>    | Ca_Kabuli_Chr06              | 35596174                       | (G/A)       |
| 10950       | CakSNP10950    | <i>Kabuli</i>    | Ca_Kabuli_Chr06              | 35596184                       | (A/G)       |
| 10951       | CakSNP10951    | <i>Kabuli</i>    | Ca_Kabuli_Chr06              | 35596195                       | (G/C)       |
| 10952       | CakSNP10952    | <i>Kabuli</i>    | Ca_Kabuli_Chr06              | 35596197                       | (G/A)       |
| 10953       | CakSNP10953    | <i>Kabuli</i>    | Ca_Kabuli_Chr06              | 35596207                       | (G/T)       |
| 10954       | CakSNP10954    | <i>Kabuli</i>    | Ca_Kabuli_Chr06              | 35596218                       | (T/C)       |
| 10955       | CakSNP10955    | <i>Kabuli</i>    | Ca_Kabuli_Chr06              | 35596220                       | (G/A)       |
| 10956       | CakSNP10956    | <i>Kabuli</i>    | Ca_Kabuli_Chr06              | 35596230                       | (T/A)       |
| 10957       | CakSNP10957    | <i>Kabuli</i>    | Ca_Kabuli_Chr06              | 35596300                       | (G/A)       |
| 10958       | CakSNP10958    | <i>Kabuli</i>    | Ca_Kabuli_Chr06              | 35628131                       | (T/C)       |
| 10959       | CakSNP10959    | <i>Kabuli</i>    | Ca_Kabuli_Chr06              | 35719930                       | (A/C)       |
| 10960       | CakSNP10960    | <i>Kabuli</i>    | Ca_Kabuli_Chr06              | 35743792                       | (A/G)       |
| 10961       | CakSNP10961    | <i>Kabuli</i>    | Ca_Kabuli_Chr06              | 35962309                       | (C/T)       |
| 10962       | CakSNP10962    | <i>Kabuli</i>    | Ca_Kabuli_Chr06              | 35962320                       | (T/C)       |
| 10963       | CakSNP10963    | <i>Kabuli</i>    | Ca_Kabuli_Chr06              | 35962360                       | (T/C)       |
| 10964       | CakSNP10964    | <i>Kabuli</i>    | Ca_Kabuli_Chr06              | 35962364                       | (T/G)       |
| 10965       | CakSNP10965    | <i>Kabuli</i>    | Ca_Kabuli_Chr06              | 35962365                       | (T/C)       |
| 10966       | CakSNP10966    | <i>Kabuli</i>    | Ca_Kabuli_Chr06              | 35962366                       | (G/A)       |
| 10967       | CakSNP10967    | <i>Kabuli</i>    | Ca_Kabuli_Chr06              | 36094855                       | (T/G)       |
| 10968       | CakSNP10968    | <i>Kabuli</i>    | Ca_Kabuli_Chr06              | 36371775                       | (A/G)       |
| 10969       | CakSNP10969    | <i>Kabuli</i>    | Ca_Kabuli_Chr06              | 36374561                       | (C/T)       |
| 10970       | CakSNP10970    | <i>Kabuli</i>    | Ca_Kabuli_Chr06              | 36574836                       | (A/G)       |
| 10971       | CakSNP10971    | <i>Kabuli</i>    | Ca_Kabuli_Chr06              | 36790467                       | (G/A)       |
| 10972       | CakSNP10972    | <i>Kabuli</i>    | Ca_Kabuli_Chr06              | 36790458                       | (G/A)       |
| 10973       | CakSNP10973    | <i>Kabuli</i>    | Ca_Kabuli_Chr06              | 36790428                       | (G/A)       |
| 10974       | CakSNP10974    | <i>Kabuli</i>    | Ca_Kabuli_Chr06              | 36790455                       | (C/T)       |
| 10975       | CakSNP10975    | <i>Kabuli</i>    | Ca_Kabuli_Chr06              | 36790460                       | (A/G)       |
| 10976       | CakSNP10976    | <i>Kabuli</i>    | Ca_Kabuli_Chr06              | 37139425                       | (C/T)       |
| 10977       | CakSNP10977    | <i>Kabuli</i>    | Ca_Kabuli_Chr06              | 37139466                       | (G/C)       |
| 10978       | CakSNP10978    | <i>Kabuli</i>    | Ca_Kabuli_Chr06              | 37139484                       | (T/C)       |
| 10979       | CakSNP10979    | <i>Kabuli</i>    | Ca_Kabuli_Chr06              | 37139486                       | (G/A)       |
| 10980       | CakSNP10980    | <i>Kabuli</i>    | Ca_Kabuli_Chr06              | 37139533                       | (T/A)       |
| 10981       | CakSNP10981    | <i>Kabuli</i>    | Ca_Kabuli_Chr06              | 37139514                       | (C/T)       |

| <b>S.N.</b> | <b>SNP IDs</b> | <b>Cultivars</b> | <b>Chromosomes/scaffolds</b> | <b>Physical positions (bp)</b> | <b>SNPs</b> |
|-------------|----------------|------------------|------------------------------|--------------------------------|-------------|
| 10982       | CakSNP10982    | <i>Kabuli</i>    | Ca_Kabuli_Chr06              | 37139499                       | (C/G)       |
| 10983       | CakSNP10983    | <i>Kabuli</i>    | Ca_Kabuli_Chr06              | 37139610                       | (T/G)       |
| 10984       | CakSNP10984    | <i>Kabuli</i>    | Ca_Kabuli_Chr06              | 37139604                       | (G/T)       |
| 10985       | CakSNP10985    | <i>Kabuli</i>    | Ca_Kabuli_Chr06              | 37321783                       | (A/T)       |
| 10986       | CakSNP10986    | <i>Kabuli</i>    | Ca_Kabuli_Chr06              | 37476426                       | (C/T)       |
| 10987       | CakSNP10987    | <i>Kabuli</i>    | Ca_Kabuli_Chr06              | 37476437                       | (A/C)       |
| 10988       | CakSNP10988    | <i>Kabuli</i>    | Ca_Kabuli_Chr06              | 37476516                       | (G/T)       |
| 10989       | CakSNP10989    | <i>Kabuli</i>    | Ca_Kabuli_Chr06              | 37476465                       | (G/A)       |
| 10990       | CakSNP10990    | <i>Kabuli</i>    | Ca_Kabuli_Chr06              | 37484467                       | (C/T)       |
| 10991       | CakSNP10991    | <i>Kabuli</i>    | Ca_Kabuli_Chr06              | 37484468                       | (G/T)       |
| 10992       | CakSNP10992    | <i>Kabuli</i>    | Ca_Kabuli_Chr06              | 37484470                       | (C/A)       |
| 10993       | CakSNP10993    | <i>Kabuli</i>    | Ca_Kabuli_Chr06              | 37484489                       | (C/G)       |
| 10994       | CakSNP10994    | <i>Kabuli</i>    | Ca_Kabuli_Chr06              | 37484513                       | (T/C)       |
| 10995       | CakSNP10995    | <i>Kabuli</i>    | Ca_Kabuli_Chr06              | 38816345                       | (C/T)       |
| 10996       | CakSNP10996    | <i>Kabuli</i>    | Ca_Kabuli_Chr06              | 38838320                       | (A/G)       |
| 10997       | CakSNP10997    | <i>Kabuli</i>    | Ca_Kabuli_Chr06              | 38840279                       | (G/A)       |
| 10998       | CakSNP10998    | <i>Kabuli</i>    | Ca_Kabuli_Chr06              | 38840315                       | (G/A)       |
| 10999       | CakSNP10999    | <i>Kabuli</i>    | Ca_Kabuli_Chr06              | 38840273                       | (G/A)       |
| 11000       | CakSNP11000    | <i>Kabuli</i>    | Ca_Kabuli_Chr06              | 38881909                       | (C/A)       |
| 11001       | CakSNP11001    | <i>Kabuli</i>    | Ca_Kabuli_Chr06              | 38886735                       | (C/A)       |
| 11002       | CakSNP11002    | <i>Kabuli</i>    | Ca_Kabuli_Chr06              | 38994879                       | (A/G)       |
| 11003       | CakSNP11003    | <i>Kabuli</i>    | Ca_Kabuli_Chr06              | 38994925                       | (G/T)       |
| 11004       | CakSNP11004    | <i>Kabuli</i>    | Ca_Kabuli_Chr06              | 38994954                       | (A/G)       |
| 11005       | CakSNP11005    | <i>Kabuli</i>    | Ca_Kabuli_Chr06              | 38994962                       | (G/A)       |
| 11006       | CakSNP11006    | <i>Kabuli</i>    | Ca_Kabuli_Chr06              | 39028564                       | (T/G)       |
| 11007       | CakSNP11007    | <i>Kabuli</i>    | Ca_Kabuli_Chr06              | 39107187                       | (C/T)       |
| 11008       | CakSNP11008    | <i>Kabuli</i>    | Ca_Kabuli_Chr06              | 39107149                       | (A/C)       |
| 11009       | CakSNP11009    | <i>Kabuli</i>    | Ca_Kabuli_Chr06              | 39107188                       | (A/C)       |
| 11010       | CakSNP11010    | <i>Kabuli</i>    | Ca_Kabuli_Chr06              | 39317016                       | (T/G)       |
| 11011       | CakSNP11011    | <i>Kabuli</i>    | Ca_Kabuli_Chr06              | 39380625                       | (A/C)       |
| 11012       | CakSNP11012    | <i>Kabuli</i>    | Ca_Kabuli_Chr06              | 39908314                       | (T/G)       |
| 11013       | CakSNP11013    | <i>Kabuli</i>    | Ca_Kabuli_Chr06              | 40047823                       | (A/G)       |
| 11014       | CakSNP11014    | <i>Kabuli</i>    | Ca_Kabuli_Chr06              | 40128644                       | (T/C)       |
| 11015       | CakSNP11015    | <i>Kabuli</i>    | Ca_Kabuli_Chr06              | 40468356                       | (T/A)       |
| 11016       | CakSNP11016    | <i>Kabuli</i>    | Ca_Kabuli_Chr06              | 40477285                       | (G/A)       |
| 11017       | CakSNP11017    | <i>Kabuli</i>    | Ca_Kabuli_Chr06              | 40657695                       | (A/C)       |
| 11018       | CakSNP11018    | <i>Kabuli</i>    | Ca_Kabuli_Chr06              | 40735186                       | (C/A)       |
| 11019       | CakSNP11019    | <i>Kabuli</i>    | Ca_Kabuli_Chr06              | 40767566                       | (A/G)       |

| <b>S.N.</b> | <b>SNP IDs</b> | <b>Cultivars</b> | <b>Chromosomes/scaffolds</b> | <b>Physical positions (bp)</b> | <b>SNPs</b> |
|-------------|----------------|------------------|------------------------------|--------------------------------|-------------|
| 11020       | CakSNP11020    | <i>Kabuli</i>    | Ca_Kabuli_Chr06              | 40821354                       | (C/T)       |
| 11021       | CakSNP11021    | <i>Kabuli</i>    | Ca_Kabuli_Chr06              | 40935441                       | (A/T)       |
| 11022       | CakSNP11022    | <i>Kabuli</i>    | Ca_Kabuli_Chr06              | 41121337                       | (C/T)       |
| 11023       | CakSNP11023    | <i>Kabuli</i>    | Ca_Kabuli_Chr06              | 41121330                       | (G/A)       |
| 11024       | CakSNP11024    | <i>Kabuli</i>    | Ca_Kabuli_Chr06              | 41363546                       | (G/A)       |
| 11025       | CakSNP11025    | <i>Kabuli</i>    | Ca_Kabuli_Chr06              | 41420918                       | (T/A)       |
| 11026       | CakSNP11026    | <i>Kabuli</i>    | Ca_Kabuli_Chr06              | 41420917                       | (A/G)       |
| 11027       | CakSNP11027    | <i>Kabuli</i>    | Ca_Kabuli_Chr06              | 41449028                       | (C/T)       |
| 11028       | CakSNP11028    | <i>Kabuli</i>    | Ca_Kabuli_Chr06              | 41682983                       | (T/C)       |
| 11029       | CakSNP11029    | <i>Kabuli</i>    | Ca_Kabuli_Chr06              | 41682966                       | (C/T)       |
| 11030       | CakSNP11030    | <i>Kabuli</i>    | Ca_Kabuli_Chr06              | 41682943                       | (T/C)       |
| 11031       | CakSNP11031    | <i>Kabuli</i>    | Ca_Kabuli_Chr06              | 41697812                       | (T/G)       |
| 11032       | CakSNP11032    | <i>Kabuli</i>    | Ca_Kabuli_Chr06              | 41708309                       | (G/A)       |
| 11033       | CakSNP11033    | <i>Kabuli</i>    | Ca_Kabuli_Chr06              | 41708306                       | (G/A)       |
| 11034       | CakSNP11034    | <i>Kabuli</i>    | Ca_Kabuli_Chr06              | 41708523                       | (T/G)       |
| 11035       | CakSNP11035    | <i>Kabuli</i>    | Ca_Kabuli_Chr06              | 41708474                       | (G/A)       |
| 11036       | CakSNP11036    | <i>Kabuli</i>    | Ca_Kabuli_Chr06              | 41708530                       | (C/A)       |
| 11037       | CakSNP11037    | <i>Kabuli</i>    | Ca_Kabuli_Chr06              | 41907459                       | (C/G)       |
| 11038       | CakSNP11038    | <i>Kabuli</i>    | Ca_Kabuli_Chr06              | 42004851                       | (A/G)       |
| 11039       | CakSNP11039    | <i>Kabuli</i>    | Ca_Kabuli_Chr06              | 42004829                       | (T/G)       |
| 11040       | CakSNP11040    | <i>Kabuli</i>    | Ca_Kabuli_Chr06              | 42004818                       | (C/G)       |
| 11041       | CakSNP11041    | <i>Kabuli</i>    | Ca_Kabuli_Chr06              | 42004813                       | (C/T)       |
| 11042       | CakSNP11042    | <i>Kabuli</i>    | Ca_Kabuli_Chr06              | 42161851                       | (A/G)       |
| 11043       | CakSNP11043    | <i>Kabuli</i>    | Ca_Kabuli_Chr06              | 42161857                       | (C/G)       |
| 11044       | CakSNP11044    | <i>Kabuli</i>    | Ca_Kabuli_Chr06              | 42161866                       | (T/G)       |
| 11045       | CakSNP11045    | <i>Kabuli</i>    | Ca_Kabuli_Chr06              | 42521162                       | (G/T)       |
| 11046       | CakSNP11046    | <i>Kabuli</i>    | Ca_Kabuli_Chr06              | 42855091                       | (T/G)       |
| 11047       | CakSNP11047    | <i>Kabuli</i>    | Ca_Kabuli_Chr06              | 42904998                       | (C/G)       |
| 11048       | CakSNP11048    | <i>Kabuli</i>    | Ca_Kabuli_Chr06              | 42905012                       | (G/A)       |
| 11049       | CakSNP11049    | <i>Kabuli</i>    | Ca_Kabuli_Chr06              | 42905039                       | (C/T)       |
| 11050       | CakSNP11050    | <i>Kabuli</i>    | Ca_Kabuli_Chr06              | 42905035                       | (T/A)       |
| 11051       | CakSNP11051    | <i>Kabuli</i>    | Ca_Kabuli_Chr06              | 42905111                       | (T/C)       |
| 11052       | CakSNP11052    | <i>Kabuli</i>    | Ca_Kabuli_Chr06              | 42905094                       | (C/T)       |
| 11053       | CakSNP11053    | <i>Kabuli</i>    | Ca_Kabuli_Chr06              | 42905090                       | (G/A)       |
| 11054       | CakSNP11054    | <i>Kabuli</i>    | Ca_Kabuli_Chr06              | 42905086                       | (T/C)       |
| 11055       | CakSNP11055    | <i>Kabuli</i>    | Ca_Kabuli_Chr06              | 42905058                       | (C/G)       |
| 11056       | CakSNP11056    | <i>Kabuli</i>    | Ca_Kabuli_Chr06              | 42905059                       | (A/G)       |
| 11057       | CakSNP11057    | <i>Kabuli</i>    | Ca_Kabuli_Chr06              | 42905072                       | (T/C)       |

| <b>S.N.</b> | <b>SNP IDs</b> | <b>Cultivars</b> | <b>Chromosomes/scaffolds</b> | <b>Physical positions (bp)</b> | <b>SNPs</b> |
|-------------|----------------|------------------|------------------------------|--------------------------------|-------------|
| 11058       | CakSNP11058    | <i>Kabuli</i>    | Ca_Kabuli_Chr06              | 42905115                       | (G/T)       |
| 11059       | CakSNP11059    | <i>Kabuli</i>    | Ca_Kabuli_Chr06              | 42905116                       | (A/T)       |
| 11060       | CakSNP11060    | <i>Kabuli</i>    | Ca_Kabuli_Chr06              | 42919899                       | (G/A)       |
| 11061       | CakSNP11061    | <i>Kabuli</i>    | Ca_Kabuli_Chr06              | 42923969                       | (A/C)       |
| 11062       | CakSNP11062    | <i>Kabuli</i>    | Ca_Kabuli_Chr06              | 42925974                       | (C/T)       |
| 11063       | CakSNP11063    | <i>Kabuli</i>    | Ca_Kabuli_Chr06              | 43148829                       | (C/T)       |
| 11064       | CakSNP11064    | <i>Kabuli</i>    | Ca_Kabuli_Chr06              | 43148824                       | (C/A)       |
| 11065       | CakSNP11065    | <i>Kabuli</i>    | Ca_Kabuli_Chr06              | 43148784                       | (C/G)       |
| 11066       | CakSNP11066    | <i>Kabuli</i>    | Ca_Kabuli_Chr06              | 43905509                       | (A/T)       |
| 11067       | CakSNP11067    | <i>Kabuli</i>    | Ca_Kabuli_Chr06              | 43907445                       | (T/C)       |
| 11068       | CakSNP11068    | <i>Kabuli</i>    | Ca_Kabuli_Chr06              | 44530888                       | (C/A)       |
| 11069       | CakSNP11069    | <i>Kabuli</i>    | Ca_Kabuli_Chr06              | 44530889                       | (A/G)       |
| 11070       | CakSNP11070    | <i>Kabuli</i>    | Ca_Kabuli_Chr06              | 44707313                       | (T/A)       |
| 11071       | CakSNP11071    | <i>Kabuli</i>    | Ca_Kabuli_Chr06              | 44711166                       | (A/G)       |
| 11072       | CakSNP11072    | <i>Kabuli</i>    | Ca_Kabuli_Chr06              | 44792535                       | (C/T)       |
| 11073       | CakSNP11073    | <i>Kabuli</i>    | Ca_Kabuli_Chr06              | 44792529                       | (G/C)       |
| 11074       | CakSNP11074    | <i>Kabuli</i>    | Ca_Kabuli_Chr06              | 44792493                       | (C/T)       |
| 11075       | CakSNP11075    | <i>Kabuli</i>    | Ca_Kabuli_Chr06              | 44792486                       | (G/A)       |
| 11076       | CakSNP11076    | <i>Kabuli</i>    | Ca_Kabuli_Chr06              | 44937666                       | (C/T)       |
| 11077       | CakSNP11077    | <i>Kabuli</i>    | Ca_Kabuli_Chr06              | 44944917                       | (G/A)       |
| 11078       | CakSNP11078    | <i>Kabuli</i>    | Ca_Kabuli_Chr06              | 45053093                       | (A/G)       |
| 11079       | CakSNP11079    | <i>Kabuli</i>    | Ca_Kabuli_Chr06              | 45053214                       | (C/T)       |
| 11080       | CakSNP11080    | <i>Kabuli</i>    | Ca_Kabuli_Chr06              | 45131295                       | (C/T)       |
| 11081       | CakSNP11081    | <i>Kabuli</i>    | Ca_Kabuli_Chr06              | 45132545                       | (A/G)       |
| 11082       | CakSNP11082    | <i>Kabuli</i>    | Ca_Kabuli_Chr06              | 45178060                       | (G/A)       |
| 11083       | CakSNP11083    | <i>Kabuli</i>    | Ca_Kabuli_Chr06              | 45178056                       | (A/G)       |
| 11084       | CakSNP11084    | <i>Kabuli</i>    | Ca_Kabuli_Chr06              | 45178045                       | (G/T)       |
| 11085       | CakSNP11085    | <i>Kabuli</i>    | Ca_Kabuli_Chr06              | 45178044                       | (G/A)       |
| 11086       | CakSNP11086    | <i>Kabuli</i>    | Ca_Kabuli_Chr06              | 45178033                       | (C/A)       |
| 11087       | CakSNP11087    | <i>Kabuli</i>    | Ca_Kabuli_Chr06              | 45178061                       | (C/T)       |
| 11088       | CakSNP11088    | <i>Kabuli</i>    | Ca_Kabuli_Chr06              | 45201783                       | (C/T)       |
| 11089       | CakSNP11089    | <i>Kabuli</i>    | Ca_Kabuli_Chr06              | 45293271                       | (T/C)       |
| 11090       | CakSNP11090    | <i>Kabuli</i>    | Ca_Kabuli_Chr06              | 45500961                       | (T/A)       |
| 11091       | CakSNP11091    | <i>Kabuli</i>    | Ca_Kabuli_Chr06              | 45501099                       | (C/A)       |
| 11092       | CakSNP11092    | <i>Kabuli</i>    | Ca_Kabuli_Chr06              | 45505942                       | (A/G)       |
| 11093       | CakSNP11093    | <i>Kabuli</i>    | Ca_Kabuli_Chr06              | 45550031                       | (C/A)       |
| 11094       | CakSNP11094    | <i>Kabuli</i>    | Ca_Kabuli_Chr06              | 45554040                       | (G/A)       |
| 11095       | CakSNP11095    | <i>Kabuli</i>    | Ca_Kabuli_Chr06              | 45557656                       | (T/C)       |

| <b>S.N.</b> | <b>SNP IDs</b> | <b>Cultivars</b> | <b>Chromosomes/scaffolds</b> | <b>Physical positions (bp)</b> | <b>SNPs</b> |
|-------------|----------------|------------------|------------------------------|--------------------------------|-------------|
| 11096       | CakSNP11096    | <i>Kabuli</i>    | Ca_Kabuli_Chr06              | 45614017                       | (T/C)       |
| 11097       | CakSNP11097    | <i>Kabuli</i>    | Ca_Kabuli_Chr06              | 45637271                       | (T/G)       |
| 11098       | CakSNP11098    | <i>Kabuli</i>    | Ca_Kabuli_Chr06              | 45637292                       | (C/A)       |
| 11099       | CakSNP11099    | <i>Kabuli</i>    | Ca_Kabuli_Chr06              | 45637293                       | (T/C)       |
| 11100       | CakSNP11100    | <i>Kabuli</i>    | Ca_Kabuli_Chr06              | 45637322                       | (C/A)       |
| 11101       | CakSNP11101    | <i>Kabuli</i>    | Ca_Kabuli_Chr06              | 45637309                       | (G/A)       |
| 11102       | CakSNP11102    | <i>Kabuli</i>    | Ca_Kabuli_Chr06              | 45637308                       | (G/T)       |
| 11103       | CakSNP11103    | <i>Kabuli</i>    | Ca_Kabuli_Chr06              | 45693275                       | (G/A)       |
| 11104       | CakSNP11104    | <i>Kabuli</i>    | Ca_Kabuli_Chr06              | 45695051                       | (T/G)       |
| 11105       | CakSNP11105    | <i>Kabuli</i>    | Ca_Kabuli_Chr06              | 45695043                       | (C/T)       |
| 11106       | CakSNP11106    | <i>Kabuli</i>    | Ca_Kabuli_Chr06              | 45695035                       | (G/A)       |
| 11107       | CakSNP11107    | <i>Kabuli</i>    | Ca_Kabuli_Chr06              | 45709318                       | (T/C)       |
| 11108       | CakSNP11108    | <i>Kabuli</i>    | Ca_Kabuli_Chr06              | 45773318                       | (C/T)       |
| 11109       | CakSNP11109    | <i>Kabuli</i>    | Ca_Kabuli_Chr06              | 45773309                       | (A/G)       |
| 11110       | CakSNP11110    | <i>Kabuli</i>    | Ca_Kabuli_Chr06              | 45773298                       | (C/G)       |
| 11111       | CakSNP11111    | <i>Kabuli</i>    | Ca_Kabuli_Chr06              | 45773409                       | (T/A)       |
| 11112       | CakSNP11112    | <i>Kabuli</i>    | Ca_Kabuli_Chr06              | 45773408                       | (T/A)       |
| 11113       | CakSNP11113    | <i>Kabuli</i>    | Ca_Kabuli_Chr06              | 45773373                       | (G/T)       |
| 11114       | CakSNP11114    | <i>Kabuli</i>    | Ca_Kabuli_Chr06              | 45773367                       | (G/T)       |
| 11115       | CakSNP11115    | <i>Kabuli</i>    | Ca_Kabuli_Chr06              | 45773349                       | (C/T)       |
| 11116       | CakSNP11116    | <i>Kabuli</i>    | Ca_Kabuli_Chr06              | 45812152                       | (G/A)       |
| 11117       | CakSNP11117    | <i>Kabuli</i>    | Ca_Kabuli_Chr06              | 45976962                       | (G/A)       |
| 11118       | CakSNP11118    | <i>Kabuli</i>    | Ca_Kabuli_Chr06              | 45978206                       | (T/C)       |
| 11119       | CakSNP11119    | <i>Kabuli</i>    | Ca_Kabuli_Chr06              | 45978263                       | (G/A)       |
| 11120       | CakSNP11120    | <i>Kabuli</i>    | Ca_Kabuli_Chr06              | 46158211                       | (C/T)       |
| 11121       | CakSNP11121    | <i>Kabuli</i>    | Ca_Kabuli_Chr06              | 46734706                       | (C/G)       |
| 11122       | CakSNP11122    | <i>Kabuli</i>    | Ca_Kabuli_Chr06              | 46734725                       | (G/A)       |
| 11123       | CakSNP11123    | <i>Kabuli</i>    | Ca_Kabuli_Chr06              | 46734726                       | (T/C)       |
| 11124       | CakSNP11124    | <i>Kabuli</i>    | Ca_Kabuli_Chr06              | 46765659                       | (G/A)       |
| 11125       | CakSNP11125    | <i>Kabuli</i>    | Ca_Kabuli_Chr06              | 46765661                       | (A/T)       |
| 11126       | CakSNP11126    | <i>Kabuli</i>    | Ca_Kabuli_Chr06              | 46765673                       | (G/A)       |
| 11127       | CakSNP11127    | <i>Kabuli</i>    | Ca_Kabuli_Chr06              | 46765688                       | (A/C)       |
| 11128       | CakSNP11128    | <i>Kabuli</i>    | Ca_Kabuli_Chr06              | 46765725                       | (C/T)       |
| 11129       | CakSNP11129    | <i>Kabuli</i>    | Ca_Kabuli_Chr06              | 46765778                       | (C/A)       |
| 11130       | CakSNP11130    | <i>Kabuli</i>    | Ca_Kabuli_Chr06              | 46765696                       | (C/T)       |
| 11131       | CakSNP11131    | <i>Kabuli</i>    | Ca_Kabuli_Chr06              | 46830497                       | (A/T)       |
| 11132       | CakSNP11132    | <i>Kabuli</i>    | Ca_Kabuli_Chr06              | 46896903                       | (C/T)       |
| 11133       | CakSNP11133    | <i>Kabuli</i>    | Ca_Kabuli_Chr06              | 46896910                       | (A/C)       |

| <b>S.N.</b> | <b>SNP IDs</b> | <b>Cultivars</b> | <b>Chromosomes/scaffolds</b> | <b>Physical positions (bp)</b> | <b>SNPs</b> |
|-------------|----------------|------------------|------------------------------|--------------------------------|-------------|
| 11134       | CakSNP11134    | <i>Kabuli</i>    | Ca_Kabuli_Chr06              | 46898225                       | (A/C)       |
| 11135       | CakSNP11135    | <i>Kabuli</i>    | Ca_Kabuli_Chr06              | 46898305                       | (T/G)       |
| 11136       | CakSNP11136    | <i>Kabuli</i>    | Ca_Kabuli_Chr06              | 46898316                       | (T/G)       |
| 11137       | CakSNP11137    | <i>Kabuli</i>    | Ca_Kabuli_Chr06              | 46898317                       | (C/T)       |
| 11138       | CakSNP11138    | <i>Kabuli</i>    | Ca_Kabuli_Chr06              | 46898363                       | (C/T)       |
| 11139       | CakSNP11139    | <i>Kabuli</i>    | Ca_Kabuli_Chr06              | 46898329                       | (T/A)       |
| 11140       | CakSNP11140    | <i>Kabuli</i>    | Ca_Kabuli_Chr06              | 46898747                       | (G/A)       |
| 11141       | CakSNP11141    | <i>Kabuli</i>    | Ca_Kabuli_Chr06              | 46898743                       | (A/G)       |
| 11142       | CakSNP11142    | <i>Kabuli</i>    | Ca_Kabuli_Chr06              | 46899229                       | (G/A)       |
| 11143       | CakSNP11143    | <i>Kabuli</i>    | Ca_Kabuli_Chr06              | 46979240                       | (C/T)       |
| 11144       | CakSNP11144    | <i>Kabuli</i>    | Ca_Kabuli_Chr06              | 46979267                       | (C/A)       |
| 11145       | CakSNP11145    | <i>Kabuli</i>    | Ca_Kabuli_Chr06              | 46998948                       | (G/A)       |
| 11146       | CakSNP11146    | <i>Kabuli</i>    | Ca_Kabuli_Chr06              | 46999012                       | (C/T)       |
| 11147       | CakSNP11147    | <i>Kabuli</i>    | Ca_Kabuli_Chr06              | 47104478                       | (T/G)       |
| 11148       | CakSNP11148    | <i>Kabuli</i>    | Ca_Kabuli_Chr06              | 47104505                       | (C/T)       |
| 11149       | CakSNP11149    | <i>Kabuli</i>    | Ca_Kabuli_Chr06              | 47106174                       | (A/G)       |
| 11150       | CakSNP11150    | <i>Kabuli</i>    | Ca_Kabuli_Chr06              | 47106238                       | (C/A)       |
| 11151       | CakSNP11151    | <i>Kabuli</i>    | Ca_Kabuli_Chr06              | 47232630                       | (C/T)       |
| 11152       | CakSNP11152    | <i>Kabuli</i>    | Ca_Kabuli_Chr06              | 47232631                       | (C/G)       |
| 11153       | CakSNP11153    | <i>Kabuli</i>    | Ca_Kabuli_Chr06              | 47232685                       | (T/A)       |
| 11154       | CakSNP11154    | <i>Kabuli</i>    | Ca_Kabuli_Chr06              | 47440468                       | (A/T)       |
| 11155       | CakSNP11155    | <i>Kabuli</i>    | Ca_Kabuli_Chr06              | 47575655                       | (G/T)       |
| 11156       | CakSNP11156    | <i>Kabuli</i>    | Ca_Kabuli_Chr06              | 47575659                       | (C/G)       |
| 11157       | CakSNP11157    | <i>Kabuli</i>    | Ca_Kabuli_Chr06              | 47906683                       | (G/A)       |
| 11158       | CakSNP11158    | <i>Kabuli</i>    | Ca_Kabuli_Chr06              | 47906680                       | (C/T)       |
| 11159       | CakSNP11159    | <i>Kabuli</i>    | Ca_Kabuli_Chr06              | 47906629                       | (T/G)       |
| 11160       | CakSNP11160    | <i>Kabuli</i>    | Ca_Kabuli_Chr06              | 48088550                       | (G/A)       |
| 11161       | CakSNP11161    | <i>Kabuli</i>    | Ca_Kabuli_Chr06              | 48088592                       | (C/T)       |
| 11162       | CakSNP11162    | <i>Kabuli</i>    | Ca_Kabuli_Chr06              | 48255392                       | (G/A)       |
| 11163       | CakSNP11163    | <i>Kabuli</i>    | Ca_Kabuli_Chr06              | 48255538                       | (A/G)       |
| 11164       | CakSNP11164    | <i>Kabuli</i>    | Ca_Kabuli_Chr06              | 48255558                       | (C/T)       |
| 11165       | CakSNP11165    | <i>Kabuli</i>    | Ca_Kabuli_Chr06              | 48255559                       | (A/G)       |
| 11166       | CakSNP11166    | <i>Kabuli</i>    | Ca_Kabuli_Chr06              | 48255568                       | (A/G)       |
| 11167       | CakSNP11167    | <i>Kabuli</i>    | Ca_Kabuli_Chr06              | 48255599                       | (C/A)       |
| 11168       | CakSNP11168    | <i>Kabuli</i>    | Ca_Kabuli_Chr06              | 48314052                       | (T/A)       |
| 11169       | CakSNP11169    | <i>Kabuli</i>    | Ca_Kabuli_Chr06              | 48314788                       | (T/C)       |
| 11170       | CakSNP11170    | <i>Kabuli</i>    | Ca_Kabuli_Chr06              | 48315194                       | (C/A)       |
| 11171       | CakSNP11171    | <i>Kabuli</i>    | Ca_Kabuli_Chr06              | 48315340                       | (C/A)       |



| <b>S.N.</b> | <b>SNP IDs</b> | <b>Cultivars</b> | <b>Chromosomes/scaffolds</b> | <b>Physical positions (bp)</b> | <b>SNPs</b> |
|-------------|----------------|------------------|------------------------------|--------------------------------|-------------|
| 11172       | CakSNP11172    | <i>Kabuli</i>    | Ca_Kabuli_Chr06              | 48315343                       | (G/T)       |
| 11173       | CakSNP11173    | <i>Kabuli</i>    | Ca_Kabuli_Chr06              | 48810611                       | (A/T)       |
| 11174       | CakSNP11174    | <i>Kabuli</i>    | Ca_Kabuli_Chr06              | 48810608                       | (C/T)       |
| 11175       | CakSNP11175    | <i>Kabuli</i>    | Ca_Kabuli_Chr06              | 48864622                       | (T/C)       |
| 11176       | CakSNP11176    | <i>Kabuli</i>    | Ca_Kabuli_Chr06              | 48864625                       | (G/A)       |
| 11177       | CakSNP11177    | <i>Kabuli</i>    | Ca_Kabuli_Chr06              | 48864639                       | (A/C)       |
| 11178       | CakSNP11178    | <i>Kabuli</i>    | Ca_Kabuli_Chr06              | 48864699                       | (T/C)       |
| 11179       | CakSNP11179    | <i>Kabuli</i>    | Ca_Kabuli_Chr06              | 48869462                       | (C/T)       |
| 11180       | CakSNP11180    | <i>Kabuli</i>    | Ca_Kabuli_Chr06              | 48869473                       | (C/A)       |
| 11181       | CakSNP11181    | <i>Kabuli</i>    | Ca_Kabuli_Chr06              | 48869484                       | (G/A)       |
| 11182       | CakSNP11182    | <i>Kabuli</i>    | Ca_Kabuli_Chr06              | 48869577                       | (C/T)       |
| 11183       | CakSNP11183    | <i>Kabuli</i>    | Ca_Kabuli_Chr06              | 48869539                       | (A/G)       |
| 11184       | CakSNP11184    | <i>Kabuli</i>    | Ca_Kabuli_Chr06              | 48869529                       | (T/C)       |
| 11185       | CakSNP11185    | <i>Kabuli</i>    | Ca_Kabuli_Chr06              | 48869512                       | (G/C)       |
| 11186       | CakSNP11186    | <i>Kabuli</i>    | Ca_Kabuli_Chr06              | 48940386                       | (A/C)       |
| 11187       | CakSNP11187    | <i>Kabuli</i>    | Ca_Kabuli_Chr06              | 49044772                       | (A/C)       |
| 11188       | CakSNP11188    | <i>Kabuli</i>    | Ca_Kabuli_Chr06              | 49044785                       | (C/T)       |
| 11189       | CakSNP11189    | <i>Kabuli</i>    | Ca_Kabuli_Chr06              | 49044794                       | (T/A)       |
| 11190       | CakSNP11190    | <i>Kabuli</i>    | Ca_Kabuli_Chr06              | 49044802                       | (T/C)       |
| 11191       | CakSNP11191    | <i>Kabuli</i>    | Ca_Kabuli_Chr06              | 49044805                       | (A/G)       |
| 11192       | CakSNP11192    | <i>Kabuli</i>    | Ca_Kabuli_Chr06              | 49044814                       | (G/T)       |
| 11193       | CakSNP11193    | <i>Kabuli</i>    | Ca_Kabuli_Chr06              | 49044824                       | (C/T)       |
| 11194       | CakSNP11194    | <i>Kabuli</i>    | Ca_Kabuli_Chr06              | 49044839                       | (T/A)       |
| 11195       | CakSNP11195    | <i>Kabuli</i>    | Ca_Kabuli_Chr06              | 49044850                       | (A/C)       |
| 11196       | CakSNP11196    | <i>Kabuli</i>    | Ca_Kabuli_Chr06              | 49044847                       | (G/A)       |
| 11197       | CakSNP11197    | <i>Kabuli</i>    | Ca_Kabuli_Chr06              | 49044842                       | (G/A)       |
| 11198       | CakSNP11198    | <i>Kabuli</i>    | Ca_Kabuli_Chr06              | 49044838                       | (C/A)       |
| 11199       | CakSNP11199    | <i>Kabuli</i>    | Ca_Kabuli_Chr06              | 49044835                       | (C/A)       |
| 11200       | CakSNP11200    | <i>Kabuli</i>    | Ca_Kabuli_Chr06              | 49044826                       | (G/A)       |
| 11201       | CakSNP11201    | <i>Kabuli</i>    | Ca_Kabuli_Chr06              | 49044821                       | (C/G)       |
| 11202       | CakSNP11202    | <i>Kabuli</i>    | Ca_Kabuli_Chr06              | 49044810                       | (G/A)       |
| 11203       | CakSNP11203    | <i>Kabuli</i>    | Ca_Kabuli_Chr06              | 49044808                       | (C/T)       |
| 11204       | CakSNP11204    | <i>Kabuli</i>    | Ca_Kabuli_Chr06              | 49044788                       | (T/A)       |
| 11205       | CakSNP11205    | <i>Kabuli</i>    | Ca_Kabuli_Chr06              | 49044780                       | (G/A)       |
| 11206       | CakSNP11206    | <i>Kabuli</i>    | Ca_Kabuli_Chr06              | 49044915                       | (A/G)       |
| 11207       | CakSNP11207    | <i>Kabuli</i>    | Ca_Kabuli_Chr06              | 49044928                       | (C/A)       |
| 11208       | CakSNP11208    | <i>Kabuli</i>    | Ca_Kabuli_Chr06              | 49044936                       | (C/T)       |
| 11209       | CakSNP11209    | <i>Kabuli</i>    | Ca_Kabuli_Chr06              | 49044937                       | (A/G)       |

| <b>S.N.</b> | <b>SNP IDs</b> | <b>Cultivars</b> | <b>Chromosomes/scaffolds</b> | <b>Physical positions (bp)</b> | <b>SNPs</b> |
|-------------|----------------|------------------|------------------------------|--------------------------------|-------------|
| 11210       | CakSNP11210    | <i>Kabuli</i>    | Ca_Kabuli_Chr06              | 49044944                       | (A/G)       |
| 11211       | CakSNP11211    | <i>Kabuli</i>    | Ca_Kabuli_Chr06              | 49101829                       | (G/C)       |
| 11212       | CakSNP11212    | <i>Kabuli</i>    | Ca_Kabuli_Chr06              | 49167341                       | (T/G)       |
| 11213       | CakSNP11213    | <i>Kabuli</i>    | Ca_Kabuli_Chr06              | 49222291                       | (G/A)       |
| 11214       | CakSNP11214    | <i>Kabuli</i>    | Ca_Kabuli_Chr06              | 49222290                       | (C/T)       |
| 11215       | CakSNP11215    | <i>Kabuli</i>    | Ca_Kabuli_Chr06              | 49222275                       | (A/C)       |
| 11216       | CakSNP11216    | <i>Kabuli</i>    | Ca_Kabuli_Chr06              | 49222268                       | (T/A)       |
| 11217       | CakSNP11217    | <i>Kabuli</i>    | Ca_Kabuli_Chr06              | 49222251                       | (G/A)       |
| 11218       | CakSNP11218    | <i>Kabuli</i>    | Ca_Kabuli_Chr06              | 49222235                       | (G/C)       |
| 11219       | CakSNP11219    | <i>Kabuli</i>    | Ca_Kabuli_Chr06              | 49377275                       | (G/A)       |
| 11220       | CakSNP11220    | <i>Kabuli</i>    | Ca_Kabuli_Chr06              | 49403430                       | (G/C)       |
| 11221       | CakSNP11221    | <i>Kabuli</i>    | Ca_Kabuli_Chr06              | 49406604                       | (G/A)       |
| 11222       | CakSNP11222    | <i>Kabuli</i>    | Ca_Kabuli_Chr06              | 49406599                       | (C/A)       |
| 11223       | CakSNP11223    | <i>Kabuli</i>    | Ca_Kabuli_Chr06              | 49466066                       | (A/G)       |
| 11224       | CakSNP11224    | <i>Kabuli</i>    | Ca_Kabuli_Chr06              | 49475716                       | (G/A)       |
| 11225       | CakSNP11225    | <i>Kabuli</i>    | Ca_Kabuli_Chr06              | 49475715                       | (A/G)       |
| 11226       | CakSNP11226    | <i>Kabuli</i>    | Ca_Kabuli_Chr06              | 49524179                       | (A/T)       |
| 11227       | CakSNP11227    | <i>Kabuli</i>    | Ca_Kabuli_Chr06              | 49565934                       | (C/T)       |
| 11228       | CakSNP11228    | <i>Kabuli</i>    | Ca_Kabuli_Chr06              | 49664132                       | (C/G)       |
| 11229       | CakSNP11229    | <i>Kabuli</i>    | Ca_Kabuli_Chr06              | 49724448                       | (C/T)       |
| 11230       | CakSNP11230    | <i>Kabuli</i>    | Ca_Kabuli_Chr06              | 49724515                       | (C/T)       |
| 11231       | CakSNP11231    | <i>Kabuli</i>    | Ca_Kabuli_Chr06              | 49726734                       | (C/G)       |
| 11232       | CakSNP11232    | <i>Kabuli</i>    | Ca_Kabuli_Chr06              | 49726732                       | (T/C)       |
| 11233       | CakSNP11233    | <i>Kabuli</i>    | Ca_Kabuli_Chr06              | 49726729                       | (G/A)       |
| 11234       | CakSNP11234    | <i>Kabuli</i>    | Ca_Kabuli_Chr06              | 49726711                       | (C/T)       |
| 11235       | CakSNP11235    | <i>Kabuli</i>    | Ca_Kabuli_Chr06              | 49726723                       | (G/A)       |
| 11236       | CakSNP11236    | <i>Kabuli</i>    | Ca_Kabuli_Chr06              | 49830299                       | (A/G)       |
| 11237       | CakSNP11237    | <i>Kabuli</i>    | Ca_Kabuli_Chr06              | 49830384                       | (G/A)       |
| 11238       | CakSNP11238    | <i>Kabuli</i>    | Ca_Kabuli_Chr06              | 49833934                       | (C/T)       |
| 11239       | CakSNP11239    | <i>Kabuli</i>    | Ca_Kabuli_Chr06              | 49843667                       | (G/A)       |
| 11240       | CakSNP11240    | <i>Kabuli</i>    | Ca_Kabuli_Chr06              | 49846257                       | (A/T)       |
| 11241       | CakSNP11241    | <i>Kabuli</i>    | Ca_Kabuli_Chr06              | 49846303                       | (T/G)       |
| 11242       | CakSNP11242    | <i>Kabuli</i>    | Ca_Kabuli_Chr06              | 49931821                       | (C/T)       |
| 11243       | CakSNP11243    | <i>Kabuli</i>    | Ca_Kabuli_Chr06              | 49931879                       | (T/C)       |
| 11244       | CakSNP11244    | <i>Kabuli</i>    | Ca_Kabuli_Chr06              | 49942397                       | (A/G)       |
| 11245       | CakSNP11245    | <i>Kabuli</i>    | Ca_Kabuli_Chr06              | 50086781                       | (A/G)       |
| 11246       | CakSNP11246    | <i>Kabuli</i>    | Ca_Kabuli_Chr06              | 50152053                       | (C/T)       |
| 11247       | CakSNP11247    | <i>Kabuli</i>    | Ca_Kabuli_Chr06              | 50152129                       | (C/T)       |

| <b>S.N.</b> | <b>SNP IDs</b> | <b>Cultivars</b> | <b>Chromosomes/scaffolds</b> | <b>Physical positions (bp)</b> | <b>SNPs</b> |
|-------------|----------------|------------------|------------------------------|--------------------------------|-------------|
| 11248       | CakSNP11248    | <i>Kabuli</i>    | Ca_Kabuli_Chr06              | 50152124                       | (C/T)       |
| 11249       | CakSNP11249    | <i>Kabuli</i>    | Ca_Kabuli_Chr06              | 50152119                       | (T/C)       |
| 11250       | CakSNP11250    | <i>Kabuli</i>    | Ca_Kabuli_Chr06              | 50152083                       | (C/T)       |
| 11251       | CakSNP11251    | <i>Kabuli</i>    | Ca_Kabuli_Chr06              | 50217734                       | (G/A)       |
| 11252       | CakSNP11252    | <i>Kabuli</i>    | Ca_Kabuli_Chr06              | 50356239                       | (A/G)       |
| 11253       | CakSNP11253    | <i>Kabuli</i>    | Ca_Kabuli_Chr06              | 50356229                       | (C/T)       |
| 11254       | CakSNP11254    | <i>Kabuli</i>    | Ca_Kabuli_Chr06              | 50356222                       | (C/A)       |
| 11255       | CakSNP11255    | <i>Kabuli</i>    | Ca_Kabuli_Chr06              | 50356217                       | (T/C)       |
| 11256       | CakSNP11256    | <i>Kabuli</i>    | Ca_Kabuli_Chr06              | 50356206                       | (G/T)       |
| 11257       | CakSNP11257    | <i>Kabuli</i>    | Ca_Kabuli_Chr06              | 50356201                       | (T/C)       |
| 11258       | CakSNP11258    | <i>Kabuli</i>    | Ca_Kabuli_Chr06              | 50382452                       | (C/T)       |
| 11259       | CakSNP11259    | <i>Kabuli</i>    | Ca_Kabuli_Chr06              | 50384101                       | (A/C)       |
| 11260       | CakSNP11260    | <i>Kabuli</i>    | Ca_Kabuli_Chr06              | 50390752                       | (A/G)       |
| 11261       | CakSNP11261    | <i>Kabuli</i>    | Ca_Kabuli_Chr06              | 50476721                       | (T/C)       |
| 11262       | CakSNP11262    | <i>Kabuli</i>    | Ca_Kabuli_Chr06              | 50476775                       | (G/A)       |
| 11263       | CakSNP11263    | <i>Kabuli</i>    | Ca_Kabuli_Chr06              | 50477672                       | (A/C)       |
| 11264       | CakSNP11264    | <i>Kabuli</i>    | Ca_Kabuli_Chr06              | 50581295                       | (T/G)       |
| 11265       | CakSNP11265    | <i>Kabuli</i>    | Ca_Kabuli_Chr06              | 50617926                       | (G/C)       |
| 11266       | CakSNP11266    | <i>Kabuli</i>    | Ca_Kabuli_Chr06              | 50617932                       | (G/A)       |
| 11267       | CakSNP11267    | <i>Kabuli</i>    | Ca_Kabuli_Chr06              | 50723595                       | (T/C)       |
| 11268       | CakSNP11268    | <i>Kabuli</i>    | Ca_Kabuli_Chr06              | 50723630                       | (C/T)       |
| 11269       | CakSNP11269    | <i>Kabuli</i>    | Ca_Kabuli_Chr06              | 50723916                       | (T/C)       |
| 11270       | CakSNP11270    | <i>Kabuli</i>    | Ca_Kabuli_Chr06              | 50723950                       | (A/G)       |
| 11271       | CakSNP11271    | <i>Kabuli</i>    | Ca_Kabuli_Chr06              | 50723980                       | (A/G)       |
| 11272       | CakSNP11272    | <i>Kabuli</i>    | Ca_Kabuli_Chr06              | 50723988                       | (C/A)       |
| 11273       | CakSNP11273    | <i>Kabuli</i>    | Ca_Kabuli_Chr06              | 51157961                       | (C/T)       |
| 11274       | CakSNP11274    | <i>Kabuli</i>    | Ca_Kabuli_Chr06              | 51157939                       | (A/C)       |
| 11275       | CakSNP11275    | <i>Kabuli</i>    | Ca_Kabuli_Chr06              | 51162065                       | (T/C)       |
| 11276       | CakSNP11276    | <i>Kabuli</i>    | Ca_Kabuli_Chr06              | 51281235                       | (G/A)       |
| 11277       | CakSNP11277    | <i>Kabuli</i>    | Ca_Kabuli_Chr06              | 51281178                       | (C/G)       |
| 11278       | CakSNP11278    | <i>Kabuli</i>    | Ca_Kabuli_Chr06              | 51345460                       | (G/C)       |
| 11279       | CakSNP11279    | <i>Kabuli</i>    | Ca_Kabuli_Chr06              | 51392609                       | (T/C)       |
| 11280       | CakSNP11280    | <i>Kabuli</i>    | Ca_Kabuli_Chr06              | 51471573                       | (T/C)       |
| 11281       | CakSNP11281    | <i>Kabuli</i>    | Ca_Kabuli_Chr06              | 52007211                       | (T/C)       |
| 11282       | CakSNP11282    | <i>Kabuli</i>    | Ca_Kabuli_Chr06              | 52007217                       | (G/A)       |
| 11283       | CakSNP11283    | <i>Kabuli</i>    | Ca_Kabuli_Chr06              | 52007471                       | (C/T)       |
| 11284       | CakSNP11284    | <i>Kabuli</i>    | Ca_Kabuli_Chr06              | 52007464                       | (C/G)       |
| 11285       | CakSNP11285    | <i>Kabuli</i>    | Ca_Kabuli_Chr06              | 52007440                       | (C/T)       |

| <b>S.N.</b> | <b>SNP IDs</b> | <b>Cultivars</b> | <b>Chromosomes/scaffolds</b> | <b>Physical positions (bp)</b> | <b>SNPs</b> |
|-------------|----------------|------------------|------------------------------|--------------------------------|-------------|
| 11286       | CakSNP11286    | <i>Kabuli</i>    | Ca_Kabuli_Chr06              | 52033279                       | (G/A)       |
| 11287       | CakSNP11287    | <i>Kabuli</i>    | Ca_Kabuli_Chr06              | 52033244                       | (A/T)       |
| 11288       | CakSNP11288    | <i>Kabuli</i>    | Ca_Kabuli_Chr06              | 52059750                       | (A/G)       |
| 11289       | CakSNP11289    | <i>Kabuli</i>    | Ca_Kabuli_Chr06              | 52065393                       | (C/A)       |
| 11290       | CakSNP11290    | <i>Kabuli</i>    | Ca_Kabuli_Chr06              | 52065527                       | (T/A)       |
| 11291       | CakSNP11291    | <i>Kabuli</i>    | Ca_Kabuli_Chr06              | 52164571                       | (C/A)       |
| 11292       | CakSNP11292    | <i>Kabuli</i>    | Ca_Kabuli_Chr06              | 52227277                       | (T/C)       |
| 11293       | CakSNP11293    | <i>Kabuli</i>    | Ca_Kabuli_Chr06              | 52304094                       | (C/T)       |
| 11294       | CakSNP11294    | <i>Kabuli</i>    | Ca_Kabuli_Chr06              | 52304112                       | (A/G)       |
| 11295       | CakSNP11295    | <i>Kabuli</i>    | Ca_Kabuli_Chr06              | 52363121                       | (C/T)       |
| 11296       | CakSNP11296    | <i>Kabuli</i>    | Ca_Kabuli_Chr06              | 52416366                       | (T/A)       |
| 11297       | CakSNP11297    | <i>Kabuli</i>    | Ca_Kabuli_Chr06              | 52417684                       | (C/T)       |
| 11298       | CakSNP11298    | <i>Kabuli</i>    | Ca_Kabuli_Chr06              | 52417717                       | (T/G)       |
| 11299       | CakSNP11299    | <i>Kabuli</i>    | Ca_Kabuli_Chr06              | 52417720                       | (A/T)       |
| 11300       | CakSNP11300    | <i>Kabuli</i>    | Ca_Kabuli_Chr06              | 52417736                       | (T/A)       |
| 11301       | CakSNP11301    | <i>Kabuli</i>    | Ca_Kabuli_Chr06              | 52417747                       | (G/T)       |
| 11302       | CakSNP11302    | <i>Kabuli</i>    | Ca_Kabuli_Chr06              | 52567474                       | (A/C)       |
| 11303       | CakSNP11303    | <i>Kabuli</i>    | Ca_Kabuli_Chr06              | 52596602                       | (T/A)       |
| 11304       | CakSNP11304    | <i>Kabuli</i>    | Ca_Kabuli_Chr06              | 52596601                       | (A/T)       |
| 11305       | CakSNP11305    | <i>Kabuli</i>    | Ca_Kabuli_Chr06              | 52858359                       | (A/G)       |
| 11306       | CakSNP11306    | <i>Kabuli</i>    | Ca_Kabuli_Chr06              | 52993231                       | (A/G)       |
| 11307       | CakSNP11307    | <i>Kabuli</i>    | Ca_Kabuli_Chr06              | 53068176                       | (C/T)       |
| 11308       | CakSNP11308    | <i>Kabuli</i>    | Ca_Kabuli_Chr06              | 53068201                       | (G/T)       |
| 11309       | CakSNP11309    | <i>Kabuli</i>    | Ca_Kabuli_Chr06              | 53097833                       | (G/C)       |
| 11310       | CakSNP11310    | <i>Kabuli</i>    | Ca_Kabuli_Chr06              | 53097803                       | (A/G)       |
| 11311       | CakSNP11311    | <i>Kabuli</i>    | Ca_Kabuli_Chr06              | 53097766                       | (G/A)       |
| 11312       | CakSNP11312    | <i>Kabuli</i>    | Ca_Kabuli_Chr06              | 53124182                       | (G/T)       |
| 11313       | CakSNP11313    | <i>Kabuli</i>    | Ca_Kabuli_Chr06              | 53168715                       | (T/G)       |
| 11314       | CakSNP11314    | <i>Kabuli</i>    | Ca_Kabuli_Chr06              | 53348993                       | (C/A)       |
| 11315       | CakSNP11315    | <i>Kabuli</i>    | Ca_Kabuli_Chr06              | 53349034                       | (G/A)       |
| 11316       | CakSNP11316    | <i>Kabuli</i>    | Ca_Kabuli_Chr06              | 53390065                       | (A/G)       |
| 11317       | CakSNP11317    | <i>Kabuli</i>    | Ca_Kabuli_Chr06              | 53461929                       | (C/A)       |
| 11318       | CakSNP11318    | <i>Kabuli</i>    | Ca_Kabuli_Chr06              | 53461883                       | (A/G)       |
| 11319       | CakSNP11319    | <i>Kabuli</i>    | Ca_Kabuli_Chr06              | 53541031                       | (G/A)       |
| 11320       | CakSNP11320    | <i>Kabuli</i>    | Ca_Kabuli_Chr06              | 53541094                       | (C/G)       |
| 11321       | CakSNP11321    | <i>Kabuli</i>    | Ca_Kabuli_Chr06              | 53541111                       | (T/G)       |
| 11322       | CakSNP11322    | <i>Kabuli</i>    | Ca_Kabuli_Chr06              | 53551878                       | (C/A)       |
| 11323       | CakSNP11323    | <i>Kabuli</i>    | Ca_Kabuli_Chr06              | 53558430                       | (A/C)       |

| <b>S.N.</b> | <b>SNP IDs</b> | <b>Cultivars</b> | <b>Chromosomes/scaffolds</b> | <b>Physical positions (bp)</b> | <b>SNPs</b> |
|-------------|----------------|------------------|------------------------------|--------------------------------|-------------|
| 11324       | CakSNP11324    | <i>Kabuli</i>    | Ca_Kabuli_Chr06              | 53566496                       | (G/A)       |
| 11325       | CakSNP11325    | <i>Kabuli</i>    | Ca_Kabuli_Chr06              | 53566506                       | (C/T)       |
| 11326       | CakSNP11326    | <i>Kabuli</i>    | Ca_Kabuli_Chr06              | 53625264                       | (A/C)       |
| 11327       | CakSNP11327    | <i>Kabuli</i>    | Ca_Kabuli_Chr06              | 53683753                       | (T/C)       |
| 11328       | CakSNP11328    | <i>Kabuli</i>    | Ca_Kabuli_Chr06              | 53683891                       | (C/A)       |
| 11329       | CakSNP11329    | <i>Kabuli</i>    | Ca_Kabuli_Chr06              | 53683885                       | (C/T)       |
| 11330       | CakSNP11330    | <i>Kabuli</i>    | Ca_Kabuli_Chr06              | 53683879                       | (C/T)       |
| 11331       | CakSNP11331    | <i>Kabuli</i>    | Ca_Kabuli_Chr06              | 53683876                       | (C/T)       |
| 11332       | CakSNP11332    | <i>Kabuli</i>    | Ca_Kabuli_Chr06              | 53692784                       | (G/A)       |
| 11333       | CakSNP11333    | <i>Kabuli</i>    | Ca_Kabuli_Chr06              | 53769044                       | (A/C)       |
| 11334       | CakSNP11334    | <i>Kabuli</i>    | Ca_Kabuli_Chr06              | 53769160                       | (C/T)       |
| 11335       | CakSNP11335    | <i>Kabuli</i>    | Ca_Kabuli_Chr06              | 53769240                       | (T/A)       |
| 11336       | CakSNP11336    | <i>Kabuli</i>    | Ca_Kabuli_Chr06              | 53769241                       | (A/T)       |
| 11337       | CakSNP11337    | <i>Kabuli</i>    | Ca_Kabuli_Chr06              | 54091997                       | (A/C)       |
| 11338       | CakSNP11338    | <i>Kabuli</i>    | Ca_Kabuli_Chr06              | 54151902                       | (T/G)       |
| 11339       | CakSNP11339    | <i>Kabuli</i>    | Ca_Kabuli_Chr06              | 54151966                       | (G/C)       |
| 11340       | CakSNP11340    | <i>Kabuli</i>    | Ca_Kabuli_Chr06              | 54151969                       | (T/G)       |
| 11341       | CakSNP11341    | <i>Kabuli</i>    | Ca_Kabuli_Chr06              | 54203356                       | (G/A)       |
| 11342       | CakSNP11342    | <i>Kabuli</i>    | Ca_Kabuli_Chr06              | 54203400                       | (C/T)       |
| 11343       | CakSNP11343    | <i>Kabuli</i>    | Ca_Kabuli_Chr06              | 54226451                       | (A/T)       |
| 11344       | CakSNP11344    | <i>Kabuli</i>    | Ca_Kabuli_Chr06              | 54226432                       | (A/C)       |
| 11345       | CakSNP11345    | <i>Kabuli</i>    | Ca_Kabuli_Chr06              | 54229449                       | (G/T)       |
| 11346       | CakSNP11346    | <i>Kabuli</i>    | Ca_Kabuli_Chr06              | 54237764                       | (A/C)       |
| 11347       | CakSNP11347    | <i>Kabuli</i>    | Ca_Kabuli_Chr06              | 54237815                       | (C/T)       |
| 11348       | CakSNP11348    | <i>Kabuli</i>    | Ca_Kabuli_Chr06              | 54250702                       | (C/T)       |
| 11349       | CakSNP11349    | <i>Kabuli</i>    | Ca_Kabuli_Chr06              | 54368267                       | (G/A)       |
| 11350       | CakSNP11350    | <i>Kabuli</i>    | Ca_Kabuli_Chr06              | 54869636                       | (C/T)       |
| 11351       | CakSNP11351    | <i>Kabuli</i>    | Ca_Kabuli_Chr06              | 54869666                       | (G/A)       |
| 11352       | CakSNP11352    | <i>Kabuli</i>    | Ca_Kabuli_Chr06              | 54997337                       | (A/T)       |
| 11353       | CakSNP11353    | <i>Kabuli</i>    | Ca_Kabuli_Chr06              | 55024071                       | (C/T)       |
| 11354       | CakSNP11354    | <i>Kabuli</i>    | Ca_Kabuli_Chr06              | 55024091                       | (G/A)       |
| 11355       | CakSNP11355    | <i>Kabuli</i>    | Ca_Kabuli_Chr06              | 55024146                       | (C/T)       |
| 11356       | CakSNP11356    | <i>Kabuli</i>    | Ca_Kabuli_Chr06              | 55024140                       | (G/A)       |
| 11357       | CakSNP11357    | <i>Kabuli</i>    | Ca_Kabuli_Chr06              | 55024130                       | (T/A)       |
| 11358       | CakSNP11358    | <i>Kabuli</i>    | Ca_Kabuli_Chr06              | 55024112                       | (C/G)       |
| 11359       | CakSNP11359    | <i>Kabuli</i>    | Ca_Kabuli_Chr06              | 55024093                       | (G/C)       |
| 11360       | CakSNP11360    | <i>Kabuli</i>    | Ca_Kabuli_Chr06              | 55024108                       | (C/T)       |
| 11361       | CakSNP11361    | <i>Kabuli</i>    | Ca_Kabuli_Chr06              | 55024136                       | (C/T)       |

| <b>S.N.</b> | <b>SNP IDs</b> | <b>Cultivars</b> | <b>Chromosomes/scaffolds</b> | <b>Physical positions (bp)</b> | <b>SNPs</b> |
|-------------|----------------|------------------|------------------------------|--------------------------------|-------------|
| 11362       | CakSNP11362    | <i>Kabuli</i>    | Ca_Kabuli_Chr06              | 55024159                       | (T/A)       |
| 11363       | CakSNP11363    | <i>Kabuli</i>    | Ca_Kabuli_Chr06              | 55024198                       | (T/G)       |
| 11364       | CakSNP11364    | <i>Kabuli</i>    | Ca_Kabuli_Chr06              | 55028980                       | (G/A)       |
| 11365       | CakSNP11365    | <i>Kabuli</i>    | Ca_Kabuli_Chr06              | 55074979                       | (T/A)       |
| 11366       | CakSNP11366    | <i>Kabuli</i>    | Ca_Kabuli_Chr06              | 55083311                       | (T/A)       |
| 11367       | CakSNP11367    | <i>Kabuli</i>    | Ca_Kabuli_Chr06              | 55083721                       | (T/A)       |
| 11368       | CakSNP11368    | <i>Kabuli</i>    | Ca_Kabuli_Chr06              | 55180211                       | (A/G)       |
| 11369       | CakSNP11369    | <i>Kabuli</i>    | Ca_Kabuli_Chr06              | 55332515                       | (G/A)       |
| 11370       | CakSNP11370    | <i>Kabuli</i>    | Ca_Kabuli_Chr06              | 55914455                       | (T/C)       |
| 11371       | CakSNP11371    | <i>Kabuli</i>    | Ca_Kabuli_Chr06              | 55914451                       | (A/G)       |
| 11372       | CakSNP11372    | <i>Kabuli</i>    | Ca_Kabuli_Chr06              | 55914443                       | (T/C)       |
| 11373       | CakSNP11373    | <i>Kabuli</i>    | Ca_Kabuli_Chr06              | 55914434                       | (C/T)       |
| 11374       | CakSNP11374    | <i>Kabuli</i>    | Ca_Kabuli_Chr06              | 55914431                       | (G/A)       |
| 11375       | CakSNP11375    | <i>Kabuli</i>    | Ca_Kabuli_Chr06              | 55922843                       | (T/A)       |
| 11376       | CakSNP11376    | <i>Kabuli</i>    | Ca_Kabuli_Chr06              | 55922850                       | (C/T)       |
| 11377       | CakSNP11377    | <i>Kabuli</i>    | Ca_Kabuli_Chr06              | 55942105                       | (A/G)       |
| 11378       | CakSNP11378    | <i>Kabuli</i>    | Ca_Kabuli_Chr06              | 55953320                       | (T/A)       |
| 11379       | CakSNP11379    | <i>Kabuli</i>    | Ca_Kabuli_Chr06              | 55953327                       | (C/T)       |
| 11380       | CakSNP11380    | <i>Kabuli</i>    | Ca_Kabuli_Chr06              | 56025902                       | (A/G)       |
| 11381       | CakSNP11381    | <i>Kabuli</i>    | Ca_Kabuli_Chr06              | 56025888                       | (G/A)       |
| 11382       | CakSNP11382    | <i>Kabuli</i>    | Ca_Kabuli_Chr06              | 56025884                       | (A/G)       |
| 11383       | CakSNP11383    | <i>Kabuli</i>    | Ca_Kabuli_Chr06              | 56029491                       | (T/A)       |
| 11384       | CakSNP11384    | <i>Kabuli</i>    | Ca_Kabuli_Chr06              | 56029544                       | (A/T)       |
| 11385       | CakSNP11385    | <i>Kabuli</i>    | Ca_Kabuli_Chr06              | 56029549                       | (C/T)       |
| 11386       | CakSNP11386    | <i>Kabuli</i>    | Ca_Kabuli_Chr06              | 56137878                       | (T/C)       |
| 11387       | CakSNP11387    | <i>Kabuli</i>    | Ca_Kabuli_Chr06              | 56553930                       | (G/A)       |
| 11388       | CakSNP11388    | <i>Kabuli</i>    | Ca_Kabuli_Chr06              | 56564249                       | (G/C)       |
| 11389       | CakSNP11389    | <i>Kabuli</i>    | Ca_Kabuli_Chr06              | 56587094                       | (C/G)       |
| 11390       | CakSNP11390    | <i>Kabuli</i>    | Ca_Kabuli_Chr06              | 56593148                       | (A/G)       |
| 11391       | CakSNP11391    | <i>Kabuli</i>    | Ca_Kabuli_Chr06              | 56593121                       | (T/G)       |
| 11392       | CakSNP11392    | <i>Kabuli</i>    | Ca_Kabuli_Chr06              | 56624316                       | (A/T)       |
| 11393       | CakSNP11393    | <i>Kabuli</i>    | Ca_Kabuli_Chr06              | 56624674                       | (T/C)       |
| 11394       | CakSNP11394    | <i>Kabuli</i>    | Ca_Kabuli_Chr06              | 56624718                       | (C/A)       |
| 11395       | CakSNP11395    | <i>Kabuli</i>    | Ca_Kabuli_Chr06              | 56694898                       | (T/C)       |
| 11396       | CakSNP11396    | <i>Kabuli</i>    | Ca_Kabuli_Chr06              | 56765524                       | (C/A)       |
| 11397       | CakSNP11397    | <i>Kabuli</i>    | Ca_Kabuli_Chr06              | 56793077                       | (G/A)       |
| 11398       | CakSNP11398    | <i>Kabuli</i>    | Ca_Kabuli_Chr06              | 56793037                       | (A/T)       |
| 11399       | CakSNP11399    | <i>Kabuli</i>    | Ca_Kabuli_Chr06              | 56793021                       | (G/T)       |

| <b>S.N.</b> | <b>SNP IDs</b> | <b>Cultivars</b> | <b>Chromosomes/scaffolds</b> | <b>Physical positions (bp)</b> | <b>SNPs</b> |
|-------------|----------------|------------------|------------------------------|--------------------------------|-------------|
| 11400       | CakSNP11400    | <i>Kabuli</i>    | Ca_Kabuli_Chr06              | 56793122                       | (C/T)       |
| 11401       | CakSNP11401    | <i>Kabuli</i>    | Ca_Kabuli_Chr06              | 56822084                       | (G/T)       |
| 11402       | CakSNP11402    | <i>Kabuli</i>    | Ca_Kabuli_Chr06              | 56822060                       | (G/A)       |
| 11403       | CakSNP11403    | <i>Kabuli</i>    | Ca_Kabuli_Chr06              | 56840030                       | (A/C)       |
| 11404       | CakSNP11404    | <i>Kabuli</i>    | Ca_Kabuli_Chr06              | 56840084                       | (A/T)       |
| 11405       | CakSNP11405    | <i>Kabuli</i>    | Ca_Kabuli_Chr06              | 56840063                       | (T/A)       |
| 11406       | CakSNP11406    | <i>Kabuli</i>    | Ca_Kabuli_Chr06              | 56840038                       | (A/T)       |
| 11407       | CakSNP11407    | <i>Kabuli</i>    | Ca_Kabuli_Chr06              | 56854753                       | (T/C)       |
| 11408       | CakSNP11408    | <i>Kabuli</i>    | Ca_Kabuli_Chr06              | 56946415                       | (A/G)       |
| 11409       | CakSNP11409    | <i>Kabuli</i>    | Ca_Kabuli_Chr06              | 56946431                       | (T/C)       |
| 11410       | CakSNP11410    | <i>Kabuli</i>    | Ca_Kabuli_Chr06              | 56950487                       | (G/T)       |
| 11411       | CakSNP11411    | <i>Kabuli</i>    | Ca_Kabuli_Chr06              | 56980313                       | (T/C)       |
| 11412       | CakSNP11412    | <i>Kabuli</i>    | Ca_Kabuli_Chr06              | 56980286                       | (T/C)       |
| 11413       | CakSNP11413    | <i>Kabuli</i>    | Ca_Kabuli_Chr06              | 56980321                       | (T/C)       |
| 11414       | CakSNP11414    | <i>Kabuli</i>    | Ca_Kabuli_Chr06              | 57147008                       | (A/G)       |
| 11415       | CakSNP11415    | <i>Kabuli</i>    | Ca_Kabuli_Chr06              | 57198837                       | (G/A)       |
| 11416       | CakSNP11416    | <i>Kabuli</i>    | Ca_Kabuli_Chr06              | 57259982                       | (C/A)       |
| 11417       | CakSNP11417    | <i>Kabuli</i>    | Ca_Kabuli_Chr06              | 57260020                       | (A/G)       |
| 11418       | CakSNP11418    | <i>Kabuli</i>    | Ca_Kabuli_Chr06              | 57260022                       | (T/C)       |
| 11419       | CakSNP11419    | <i>Kabuli</i>    | Ca_Kabuli_Chr06              | 57272604                       | (A/G)       |
| 11420       | CakSNP11420    | <i>Kabuli</i>    | Ca_Kabuli_Chr06              | 57272607                       | (G/A)       |
| 11421       | CakSNP11421    | <i>Kabuli</i>    | Ca_Kabuli_Chr06              | 57272608                       | (C/A)       |
| 11422       | CakSNP11422    | <i>Kabuli</i>    | Ca_Kabuli_Chr06              | 57277430                       | (A/G)       |
| 11423       | CakSNP11423    | <i>Kabuli</i>    | Ca_Kabuli_Chr06              | 57277440                       | (C/T)       |
| 11424       | CakSNP11424    | <i>Kabuli</i>    | Ca_Kabuli_Chr06              | 57344963                       | (G/T)       |
| 11425       | CakSNP11425    | <i>Kabuli</i>    | Ca_Kabuli_Chr06              | 57382220                       | (G/A)       |
| 11426       | CakSNP11426    | <i>Kabuli</i>    | Ca_Kabuli_Chr06              | 57433674                       | (T/A)       |
| 11427       | CakSNP11427    | <i>Kabuli</i>    | Ca_Kabuli_Chr06              | 57436112                       | (A/T)       |
| 11428       | CakSNP11428    | <i>Kabuli</i>    | Ca_Kabuli_Chr06              | 57436119                       | (T/C)       |
| 11429       | CakSNP11429    | <i>Kabuli</i>    | Ca_Kabuli_Chr06              | 57436149                       | (T/A)       |
| 11430       | CakSNP11430    | <i>Kabuli</i>    | Ca_Kabuli_Chr06              | 57436320                       | (T/G)       |
| 11431       | CakSNP11431    | <i>Kabuli</i>    | Ca_Kabuli_Chr06              | 57437904                       | (A/G)       |
| 11432       | CakSNP11432    | <i>Kabuli</i>    | Ca_Kabuli_Chr06              | 57449892                       | (A/G)       |
| 11433       | CakSNP11433    | <i>Kabuli</i>    | Ca_Kabuli_Chr06              | 57475853                       | (G/T)       |
| 11434       | CakSNP11434    | <i>Kabuli</i>    | Ca_Kabuli_Chr06              | 57475892                       | (A/G)       |
| 11435       | CakSNP11435    | <i>Kabuli</i>    | Ca_Kabuli_Chr06              | 57475982                       | (A/G)       |
| 11436       | CakSNP11436    | <i>Kabuli</i>    | Ca_Kabuli_Chr06              | 57533087                       | (G/A)       |
| 11437       | CakSNP11437    | <i>Kabuli</i>    | Ca_Kabuli_Chr06              | 57579770                       | (G/T)       |

| <b>S.N.</b> | <b>SNP IDs</b> | <b>Cultivars</b> | <b>Chromosomes/scaffolds</b> | <b>Physical positions (bp)</b> | <b>SNPs</b> |
|-------------|----------------|------------------|------------------------------|--------------------------------|-------------|
| 11438       | CakSNP11438    | <i>Kabuli</i>    | Ca_Kabuli_Chr06              | 57579768                       | (C/T)       |
| 11439       | CakSNP11439    | <i>Kabuli</i>    | Ca_Kabuli_Chr06              | 57580569                       | (C/T)       |
| 11440       | CakSNP11440    | <i>Kabuli</i>    | Ca_Kabuli_Chr06              | 57603257                       | (T/A)       |
| 11441       | CakSNP11441    | <i>Kabuli</i>    | Ca_Kabuli_Chr06              | 57625134                       | (G/A)       |
| 11442       | CakSNP11442    | <i>Kabuli</i>    | Ca_Kabuli_Chr06              | 57625320                       | (G/A)       |
| 11443       | CakSNP11443    | <i>Kabuli</i>    | Ca_Kabuli_Chr06              | 57632486                       | (C/T)       |
| 11444       | CakSNP11444    | <i>Kabuli</i>    | Ca_Kabuli_Chr06              | 57634387                       | (G/T)       |
| 11445       | CakSNP11445    | <i>Kabuli</i>    | Ca_Kabuli_Chr06              | 57634677                       | (G/A)       |
| 11446       | CakSNP11446    | <i>Kabuli</i>    | Ca_Kabuli_Chr06              | 57637091                       | (G/A)       |
| 11447       | CakSNP11447    | <i>Kabuli</i>    | Ca_Kabuli_Chr06              | 57637083                       | (T/G)       |
| 11448       | CakSNP11448    | <i>Kabuli</i>    | Ca_Kabuli_Chr06              | 57637075                       | (C/T)       |
| 11449       | CakSNP11449    | <i>Kabuli</i>    | Ca_Kabuli_Chr06              | 57662858                       | (T/A)       |
| 11450       | CakSNP11450    | <i>Kabuli</i>    | Ca_Kabuli_Chr06              | 57667515                       | (A/T)       |
| 11451       | CakSNP11451    | <i>Kabuli</i>    | Ca_Kabuli_Chr06              | 57688937                       | (C/T)       |
| 11452       | CakSNP11452    | <i>Kabuli</i>    | Ca_Kabuli_Chr06              | 57704057                       | (C/T)       |
| 11453       | CakSNP11453    | <i>Kabuli</i>    | Ca_Kabuli_Chr06              | 57704802                       | (T/C)       |
| 11454       | CakSNP11454    | <i>Kabuli</i>    | Ca_Kabuli_Chr06              | 57705011                       | (G/A)       |
| 11455       | CakSNP11455    | <i>Kabuli</i>    | Ca_Kabuli_Chr06              | 57707716                       | (C/T)       |
| 11456       | CakSNP11456    | <i>Kabuli</i>    | Ca_Kabuli_Chr06              | 57707724                       | (A/C)       |
| 11457       | CakSNP11457    | <i>Kabuli</i>    | Ca_Kabuli_Chr06              | 57707727                       | (T/G)       |
| 11458       | CakSNP11458    | <i>Kabuli</i>    | Ca_Kabuli_Chr06              | 57707848                       | (A/G)       |
| 11459       | CakSNP11459    | <i>Kabuli</i>    | Ca_Kabuli_Chr06              | 57707846                       | (G/A)       |
| 11460       | CakSNP11460    | <i>Kabuli</i>    | Ca_Kabuli_Chr06              | 57707912                       | (G/C)       |
| 11461       | CakSNP11461    | <i>Kabuli</i>    | Ca_Kabuli_Chr06              | 57708019                       | (A/G)       |
| 11462       | CakSNP11462    | <i>Kabuli</i>    | Ca_Kabuli_Chr06              | 57708130                       | (T/C)       |
| 11463       | CakSNP11463    | <i>Kabuli</i>    | Ca_Kabuli_Chr06              | 57708101                       | (T/G)       |
| 11464       | CakSNP11464    | <i>Kabuli</i>    | Ca_Kabuli_Chr06              | 57708198                       | (C/T)       |
| 11465       | CakSNP11465    | <i>Kabuli</i>    | Ca_Kabuli_Chr06              | 57710133                       | (C/G)       |
| 11466       | CakSNP11466    | <i>Kabuli</i>    | Ca_Kabuli_Chr06              | 57720446                       | (T/C)       |
| 11467       | CakSNP11467    | <i>Kabuli</i>    | Ca_Kabuli_Chr06              | 57723992                       | (A/C)       |
| 11468       | CakSNP11468    | <i>Kabuli</i>    | Ca_Kabuli_Chr06              | 57725372                       | (A/C)       |
| 11469       | CakSNP11469    | <i>Kabuli</i>    | Ca_Kabuli_Chr06              | 57746989                       | (C/T)       |
| 11470       | CakSNP11470    | <i>Kabuli</i>    | Ca_Kabuli_Chr06              | 57747101                       | (C/T)       |
| 11471       | CakSNP11471    | <i>Kabuli</i>    | Ca_Kabuli_Chr06              | 57748565                       | (A/G)       |
| 11472       | CakSNP11472    | <i>Kabuli</i>    | Ca_Kabuli_Chr06              | 57748602                       | (A/T)       |
| 11473       | CakSNP11473    | <i>Kabuli</i>    | Ca_Kabuli_Chr06              | 57753076                       | (T/C)       |
| 11474       | CakSNP11474    | <i>Kabuli</i>    | Ca_Kabuli_Chr06              | 57756699                       | (G/A)       |
| 11475       | CakSNP11475    | <i>Kabuli</i>    | Ca_Kabuli_Chr06              | 57760109                       | (T/G)       |



| <b>S.N.</b> | <b>SNP IDs</b> | <b>Cultivars</b> | <b>Chromosomes/scaffolds</b> | <b>Physical positions (bp)</b> | <b>SNPs</b> |
|-------------|----------------|------------------|------------------------------|--------------------------------|-------------|
| 11476       | CakSNP11476    | <i>Kabuli</i>    | Ca_Kabuli_Ch06               | 57760176                       | (C/T)       |
| 11477       | CakSNP11477    | <i>Kabuli</i>    | Ca_Kabuli_Ch06               | 57760227                       | (C/T)       |
| 11478       | CakSNP11478    | <i>Kabuli</i>    | Ca_Kabuli_Ch06               | 57760290                       | (A/T)       |
| 11479       | CakSNP11479    | <i>Kabuli</i>    | Ca_Kabuli_Ch06               | 57760291                       | (G/T)       |
| 11480       | CakSNP11480    | <i>Kabuli</i>    | Ca_Kabuli_Ch06               | 57760360                       | (A/G)       |
| 11481       | CakSNP11481    | <i>Kabuli</i>    | Ca_Kabuli_Ch06               | 57761758                       | (G/A)       |
| 11482       | CakSNP11482    | <i>Kabuli</i>    | Ca_Kabuli_Ch06               | 57761722                       | (T/C)       |
| 11483       | CakSNP11483    | <i>Kabuli</i>    | Ca_Kabuli_Ch06               | 57766444                       | (C/T)       |
| 11484       | CakSNP11484    | <i>Kabuli</i>    | Ca_Kabuli_Ch06               | 57766484                       | (T/A)       |
| 11485       | CakSNP11485    | <i>Kabuli</i>    | Ca_Kabuli_Ch06               | 57766483                       | (C/A)       |
| 11486       | CakSNP11486    | <i>Kabuli</i>    | Ca_Kabuli_Ch06               | 57766570                       | (C/T)       |
| 11487       | CakSNP11487    | <i>Kabuli</i>    | Ca_Kabuli_Ch06               | 57766588                       | (G/A)       |
| 11488       | CakSNP11488    | <i>Kabuli</i>    | Ca_Kabuli_Ch06               | 57766598                       | (G/A)       |
| 11489       | CakSNP11489    | <i>Kabuli</i>    | Ca_Kabuli_Ch06               | 57768314                       | (T/C)       |
| 11490       | CakSNP11490    | <i>Kabuli</i>    | Ca_Kabuli_Ch06               | 57801985                       | (A/C)       |
| 11491       | CakSNP11491    | <i>Kabuli</i>    | Ca_Kabuli_Ch06               | 57831050                       | (G/T)       |
| 11492       | CakSNP11492    | <i>Kabuli</i>    | Ca_Kabuli_Ch06               | 57831049                       | (C/T)       |
| 11493       | CakSNP11493    | <i>Kabuli</i>    | Ca_Kabuli_Ch06               | 57831040                       | (T/C)       |
| 11494       | CakSNP11494    | <i>Kabuli</i>    | Ca_Kabuli_Ch06               | 57835093                       | (T/A)       |
| 11495       | CakSNP11495    | <i>Kabuli</i>    | Ca_Kabuli_Ch06               | 57835120                       | (G/A)       |
| 11496       | CakSNP11496    | <i>Kabuli</i>    | Ca_Kabuli_Ch06               | 57835917                       | (G/C)       |
| 11497       | CakSNP11497    | <i>Kabuli</i>    | Ca_Kabuli_Ch06               | 57835899                       | (C/T)       |
| 11498       | CakSNP11498    | <i>Kabuli</i>    | Ca_Kabuli_Ch06               | 57836024                       | (G/A)       |
| 11499       | CakSNP11499    | <i>Kabuli</i>    | Ca_Kabuli_Ch06               | 57836237                       | (A/G)       |
| 11500       | CakSNP11500    | <i>Kabuli</i>    | Ca_Kabuli_Ch06               | 57836284                       | (G/A)       |
| 11501       | CakSNP11501    | <i>Kabuli</i>    | Ca_Kabuli_Ch06               | 57836314                       | (T/A)       |
| 11502       | CakSNP11502    | <i>Kabuli</i>    | Ca_Kabuli_Ch06               | 57836316                       | (G/A)       |
| 11503       | CakSNP11503    | <i>Kabuli</i>    | Ca_Kabuli_Ch06               | 57870893                       | (C/A)       |
| 11504       | CakSNP11504    | <i>Kabuli</i>    | Ca_Kabuli_Ch06               | 57877446                       | (C/A)       |
| 11505       | CakSNP11505    | <i>Kabuli</i>    | Ca_Kabuli_Ch06               | 57882364                       | (C/T)       |
| 11506       | CakSNP11506    | <i>Kabuli</i>    | Ca_Kabuli_Ch06               | 57894377                       | (A/G)       |
| 11507       | CakSNP11507    | <i>Kabuli</i>    | Ca_Kabuli_Ch06               | 57894495                       | (C/G)       |
| 11508       | CakSNP11508    | <i>Kabuli</i>    | Ca_Kabuli_Ch06               | 57894590                       | (G/C)       |
| 11509       | CakSNP11509    | <i>Kabuli</i>    | Ca_Kabuli_Ch06               | 57894585                       | (T/G)       |
| 11510       | CakSNP11510    | <i>Kabuli</i>    | Ca_Kabuli_Ch06               | 57904599                       | (T/C)       |
| 11511       | CakSNP11511    | <i>Kabuli</i>    | Ca_Kabuli_Ch06               | 57921373                       | (C/T)       |
| 11512       | CakSNP11512    | <i>Kabuli</i>    | Ca_Kabuli_Ch06               | 57943585                       | (A/T)       |
| 11513       | CakSNP11513    | <i>Kabuli</i>    | Ca_Kabuli_Ch06               | 57943626                       | (G/A)       |

| <b>S.N.</b> | <b>SNP IDs</b> | <b>Cultivars</b> | <b>Chromosomes/scaffolds</b> | <b>Physical positions (bp)</b> | <b>SNPs</b> |
|-------------|----------------|------------------|------------------------------|--------------------------------|-------------|
| 11514       | CakSNP11514    | <i>Kabuli</i>    | Ca_Kabuli_Chr06              | 57943628                       | (A/C)       |
| 11515       | CakSNP11515    | <i>Kabuli</i>    | Ca_Kabuli_Chr06              | 57944439                       | (C/T)       |
| 11516       | CakSNP11516    | <i>Kabuli</i>    | Ca_Kabuli_Chr06              | 57968924                       | (A/T)       |
| 11517       | CakSNP11517    | <i>Kabuli</i>    | Ca_Kabuli_Chr06              | 58036471                       | (C/T)       |
| 11518       | CakSNP11518    | <i>Kabuli</i>    | Ca_Kabuli_Chr06              | 58174702                       | (T/C)       |
| 11519       | CakSNP11519    | <i>Kabuli</i>    | Ca_Kabuli_Chr06              | 58187822                       | (T/G)       |
| 11520       | CakSNP11520    | <i>Kabuli</i>    | Ca_Kabuli_Chr06              | 58187859                       | (T/A)       |
| 11521       | CakSNP11521    | <i>Kabuli</i>    | Ca_Kabuli_Chr06              | 58187957                       | (A/G)       |
| 11522       | CakSNP11522    | <i>Kabuli</i>    | Ca_Kabuli_Chr06              | 58191050                       | (T/C)       |
| 11523       | CakSNP11523    | <i>Kabuli</i>    | Ca_Kabuli_Chr06              | 58224023                       | (G/T)       |
| 11524       | CakSNP11524    | <i>Kabuli</i>    | Ca_Kabuli_Chr06              | 58226908                       | (T/G)       |
| 11525       | CakSNP11525    | <i>Kabuli</i>    | Ca_Kabuli_Chr06              | 58227006                       | (T/C)       |
| 11526       | CakSNP11526    | <i>Kabuli</i>    | Ca_Kabuli_Chr06              | 58237503                       | (A/T)       |
| 11527       | CakSNP11527    | <i>Kabuli</i>    | Ca_Kabuli_Chr06              | 58238371                       | (T/C)       |
| 11528       | CakSNP11528    | <i>Kabuli</i>    | Ca_Kabuli_Chr06              | 58238397                       | (A/G)       |
| 11529       | CakSNP11529    | <i>Kabuli</i>    | Ca_Kabuli_Chr06              | 58243505                       | (G/A)       |
| 11530       | CakSNP11530    | <i>Kabuli</i>    | Ca_Kabuli_Chr06              | 58326344                       | (A/T)       |
| 11531       | CakSNP11531    | <i>Kabuli</i>    | Ca_Kabuli_Chr06              | 58380367                       | (T/C)       |
| 11532       | CakSNP11532    | <i>Kabuli</i>    | Ca_Kabuli_Chr06              | 58380394                       | (G/A)       |
| 11533       | CakSNP11533    | <i>Kabuli</i>    | Ca_Kabuli_Chr06              | 58380563                       | (G/A)       |
| 11534       | CakSNP11534    | <i>Kabuli</i>    | Ca_Kabuli_Chr06              | 58381203                       | (G/C)       |
| 11535       | CakSNP11535    | <i>Kabuli</i>    | Ca_Kabuli_Chr06              | 58381259                       | (A/G)       |
| 11536       | CakSNP11536    | <i>Kabuli</i>    | Ca_Kabuli_Chr06              | 58434217                       | (C/G)       |
| 11537       | CakSNP11537    | <i>Kabuli</i>    | Ca_Kabuli_Chr06              | 58452843                       | (A/C)       |
| 11538       | CakSNP11538    | <i>Kabuli</i>    | Ca_Kabuli_Chr06              | 58569576                       | (G/T)       |
| 11539       | CakSNP11539    | <i>Kabuli</i>    | Ca_Kabuli_Chr06              | 58569569                       | (T/C)       |
| 11540       | CakSNP11540    | <i>Kabuli</i>    | Ca_Kabuli_Chr06              | 58571660                       | (T/C)       |
| 11541       | CakSNP11541    | <i>Kabuli</i>    | Ca_Kabuli_Chr06              | 58596821                       | (T/G)       |
| 11542       | CakSNP11542    | <i>Kabuli</i>    | Ca_Kabuli_Chr06              | 58596878                       | (C/A)       |
| 11543       | CakSNP11543    | <i>Kabuli</i>    | Ca_Kabuli_Chr06              | 58596968                       | (T/C)       |
| 11544       | CakSNP11544    | <i>Kabuli</i>    | Ca_Kabuli_Chr06              | 58596918                       | (A/G)       |
| 11545       | CakSNP11545    | <i>Kabuli</i>    | Ca_Kabuli_Chr06              | 58600930                       | (C/A)       |
| 11546       | CakSNP11546    | <i>Kabuli</i>    | Ca_Kabuli_Chr06              | 58600952                       | (A/G)       |
| 11547       | CakSNP11547    | <i>Kabuli</i>    | Ca_Kabuli_Chr06              | 58600974                       | (A/G)       |
| 11548       | CakSNP11548    | <i>Kabuli</i>    | Ca_Kabuli_Chr06              | 58623095                       | (A/G)       |
| 11549       | CakSNP11549    | <i>Kabuli</i>    | Ca_Kabuli_Chr06              | 58623096                       | (A/T)       |
| 11550       | CakSNP11550    | <i>Kabuli</i>    | Ca_Kabuli_Chr06              | 58623220                       | (T/C)       |
| 11551       | CakSNP11551    | <i>Kabuli</i>    | Ca_Kabuli_Chr06              | 58624183                       | (G/A)       |

| <b>S.N.</b> | <b>SNP IDs</b> | <b>Cultivars</b> | <b>Chromosomes/scaffolds</b> | <b>Physical positions (bp)</b> | <b>SNPs</b> |
|-------------|----------------|------------------|------------------------------|--------------------------------|-------------|
| 11552       | CakSNP11552    | <i>Kabuli</i>    | Ca_Kabuli_Chr06              | 58624233                       | (C/A)       |
| 11553       | CakSNP11553    | <i>Kabuli</i>    | Ca_Kabuli_Chr06              | 58624299                       | (A/G)       |
| 11554       | CakSNP11554    | <i>Kabuli</i>    | Ca_Kabuli_Chr06              | 58624281                       | (A/G)       |
| 11555       | CakSNP11555    | <i>Kabuli</i>    | Ca_Kabuli_Chr06              | 58624251                       | (C/T)       |
| 11556       | CakSNP11556    | <i>Kabuli</i>    | Ca_Kabuli_Chr06              | 58650354                       | (A/G)       |
| 11557       | CakSNP11557    | <i>Kabuli</i>    | Ca_Kabuli_Chr06              | 58650330                       | (G/A)       |
| 11558       | CakSNP11558    | <i>Kabuli</i>    | Ca_Kabuli_Chr06              | 58650318                       | (A/C)       |
| 11559       | CakSNP11559    | <i>Kabuli</i>    | Ca_Kabuli_Chr06              | 58650459                       | (A/T)       |
| 11560       | CakSNP11560    | <i>Kabuli</i>    | Ca_Kabuli_Chr06              | 58650491                       | (A/G)       |
| 11561       | CakSNP11561    | <i>Kabuli</i>    | Ca_Kabuli_Chr06              | 58652881                       | (A/G)       |
| 11562       | CakSNP11562    | <i>Kabuli</i>    | Ca_Kabuli_Chr06              | 58672317                       | (A/G)       |
| 11563       | CakSNP11563    | <i>Kabuli</i>    | Ca_Kabuli_Chr06              | 58675788                       | (T/C)       |
| 11564       | CakSNP11564    | <i>Kabuli</i>    | Ca_Kabuli_Chr06              | 58675749                       | (T/C)       |
| 11565       | CakSNP11565    | <i>Kabuli</i>    | Ca_Kabuli_Chr06              | 58676507                       | (A/G)       |
| 11566       | CakSNP11566    | <i>Kabuli</i>    | Ca_Kabuli_Chr06              | 58676517                       | (A/C)       |
| 11567       | CakSNP11567    | <i>Kabuli</i>    | Ca_Kabuli_Chr06              | 58682427                       | (G/T)       |
| 11568       | CakSNP11568    | <i>Kabuli</i>    | Ca_Kabuli_Chr06              | 58682397                       | (G/A)       |
| 11569       | CakSNP11569    | <i>Kabuli</i>    | Ca_Kabuli_Chr06              | 58682387                       | (T/A)       |
| 11570       | CakSNP11570    | <i>Kabuli</i>    | Ca_Kabuli_Chr06              | 58730925                       | (T/C)       |
| 11571       | CakSNP11571    | <i>Kabuli</i>    | Ca_Kabuli_Chr06              | 58730969                       | (C/A)       |
| 11572       | CakSNP11572    | <i>Kabuli</i>    | Ca_Kabuli_Chr06              | 58730967                       | (T/G)       |
| 11573       | CakSNP11573    | <i>Kabuli</i>    | Ca_Kabuli_Chr06              | 58732424                       | (G/T)       |
| 11574       | CakSNP11574    | <i>Kabuli</i>    | Ca_Kabuli_Chr06              | 58732423                       | (C/T)       |
| 11575       | CakSNP11575    | <i>Kabuli</i>    | Ca_Kabuli_Chr06              | 58732514                       | (G/A)       |
| 11576       | CakSNP11576    | <i>Kabuli</i>    | Ca_Kabuli_Chr06              | 58732451                       | (T/C)       |
| 11577       | CakSNP11577    | <i>Kabuli</i>    | Ca_Kabuli_Chr06              | 58732475                       | (G/A)       |
| 11578       | CakSNP11578    | <i>Kabuli</i>    | Ca_Kabuli_Chr06              | 58745356                       | (A/G)       |
| 11579       | CakSNP11579    | <i>Kabuli</i>    | Ca_Kabuli_Chr06              | 58745473                       | (A/G)       |
| 11580       | CakSNP11580    | <i>Kabuli</i>    | Ca_Kabuli_Chr06              | 58745426                       | (T/C)       |
| 11581       | CakSNP11581    | <i>Kabuli</i>    | Ca_Kabuli_Chr06              | 58745583                       | (C/T)       |
| 11582       | CakSNP11582    | <i>Kabuli</i>    | Ca_Kabuli_Chr06              | 58761879                       | (G/A)       |
| 11583       | CakSNP11583    | <i>Kabuli</i>    | Ca_Kabuli_Chr06              | 58779344                       | (A/G)       |
| 11584       | CakSNP11584    | <i>Kabuli</i>    | Ca_Kabuli_Chr06              | 58779389                       | (T/G)       |
| 11585       | CakSNP11585    | <i>Kabuli</i>    | Ca_Kabuli_Chr06              | 58820632                       | (A/C)       |
| 11586       | CakSNP11586    | <i>Kabuli</i>    | Ca_Kabuli_Chr06              | 58844717                       | (T/C)       |
| 11587       | CakSNP11587    | <i>Kabuli</i>    | Ca_Kabuli_Chr06              | 58844744                       | (A/T)       |
| 11588       | CakSNP11588    | <i>Kabuli</i>    | Ca_Kabuli_Chr06              | 58844776                       | (C/G)       |
| 11589       | CakSNP11589    | <i>Kabuli</i>    | Ca_Kabuli_Chr06              | 58861614                       | (G/A)       |

| <b>S.N.</b> | <b>SNP IDs</b> | <b>Cultivars</b> | <b>Chromosomes/scaffolds</b> | <b>Physical positions (bp)</b> | <b>SNPs</b> |
|-------------|----------------|------------------|------------------------------|--------------------------------|-------------|
| 11590       | CakSNP11590    | <i>Kabuli</i>    | Ca_Kabuli_Chr06              | 58878604                       | (C/G)       |
| 11591       | CakSNP11591    | <i>Kabuli</i>    | Ca_Kabuli_Chr06              | 58879570                       | (T/C)       |
| 11592       | CakSNP11592    | <i>Kabuli</i>    | Ca_Kabuli_Chr06              | 58903346                       | (G/A)       |
| 11593       | CakSNP11593    | <i>Kabuli</i>    | Ca_Kabuli_Chr06              | 58903381                       | (G/A)       |
| 11594       | CakSNP11594    | <i>Kabuli</i>    | Ca_Kabuli_Chr06              | 58903395                       | (A/G)       |
| 11595       | CakSNP11595    | <i>Kabuli</i>    | Ca_Kabuli_Chr06              | 58903416                       | (T/G)       |
| 11596       | CakSNP11596    | <i>Kabuli</i>    | Ca_Kabuli_Chr06              | 58903497                       | (G/C)       |
| 11597       | CakSNP11597    | <i>Kabuli</i>    | Ca_Kabuli_Chr06              | 58903538                       | (G/A)       |
| 11598       | CakSNP11598    | <i>Kabuli</i>    | Ca_Kabuli_Chr06              | 58908024                       | (G/A)       |
| 11599       | CakSNP11599    | <i>Kabuli</i>    | Ca_Kabuli_Chr06              | 58908045                       | (A/G)       |
| 11600       | CakSNP11600    | <i>Kabuli</i>    | Ca_Kabuli_Chr06              | 58908069                       | (G/A)       |
| 11601       | CakSNP11601    | <i>Kabuli</i>    | Ca_Kabuli_Chr06              | 58911548                       | (T/C)       |
| 11602       | CakSNP11602    | <i>Kabuli</i>    | Ca_Kabuli_Chr06              | 58951079                       | (T/C)       |
| 11603       | CakSNP11603    | <i>Kabuli</i>    | Ca_Kabuli_Chr06              | 58951298                       | (A/G)       |
| 11604       | CakSNP11604    | <i>Kabuli</i>    | Ca_Kabuli_Chr06              | 58951583                       | (C/A)       |
| 11605       | CakSNP11605    | <i>Kabuli</i>    | Ca_Kabuli_Chr06              | 58953219                       | (A/G)       |
| 11606       | CakSNP11606    | <i>Kabuli</i>    | Ca_Kabuli_Chr06              | 58994014                       | (C/T)       |
| 11607       | CakSNP11607    | <i>Kabuli</i>    | Ca_Kabuli_Chr06              | 58994083                       | (A/G)       |
| 11608       | CakSNP11608    | <i>Kabuli</i>    | Ca_Kabuli_Chr06              | 58994281                       | (G/A)       |
| 11609       | CakSNP11609    | <i>Kabuli</i>    | Ca_Kabuli_Chr06              | 59001443                       | (C/T)       |
| 11610       | CakSNP11610    | <i>Kabuli</i>    | Ca_Kabuli_Chr06              | 59003792                       | (A/C)       |
| 11611       | CakSNP11611    | <i>Kabuli</i>    | Ca_Kabuli_Chr06              | 59064798                       | (G/T)       |
| 11612       | CakSNP11612    | <i>Kabuli</i>    | Ca_Kabuli_Chr06              | 59064815                       | (C/T)       |
| 11613       | CakSNP11613    | <i>Kabuli</i>    | Ca_Kabuli_Chr06              | 59081169                       | (C/T)       |
| 11614       | CakSNP11614    | <i>Kabuli</i>    | Ca_Kabuli_Chr06              | 59107027                       | (A/T)       |
| 11615       | CakSNP11615    | <i>Kabuli</i>    | Ca_Kabuli_Chr06              | 59107007                       | (G/T)       |
| 11616       | CakSNP11616    | <i>Kabuli</i>    | Ca_Kabuli_Chr06              | 59135944                       | (A/C)       |
| 11617       | CakSNP11617    | <i>Kabuli</i>    | Ca_Kabuli_Chr06              | 59194015                       | (C/G)       |
| 11618       | CakSNP11618    | <i>Kabuli</i>    | Ca_Kabuli_Chr06              | 59193994                       | (G/T)       |
| 11619       | CakSNP11619    | <i>Kabuli</i>    | Ca_Kabuli_Chr06              | 59194081                       | (T/A)       |
| 11620       | CakSNP11620    | <i>Kabuli</i>    | Ca_Kabuli_Chr06              | 59202825                       | (T/G)       |
| 11621       | CakSNP11621    | <i>Kabuli</i>    | Ca_Kabuli_Chr06              | 59219099                       | (T/C)       |
| 11622       | CakSNP11622    | <i>Kabuli</i>    | Ca_Kabuli_Chr06              | 59222848                       | (C/T)       |
| 11623       | CakSNP11623    | <i>Kabuli</i>    | Ca_Kabuli_Chr06              | 59296368                       | (C/T)       |
| 11624       | CakSNP11624    | <i>Kabuli</i>    | Ca_Kabuli_Chr06              | 59296460                       | (G/A)       |
| 11625       | CakSNP11625    | <i>Kabuli</i>    | Ca_Kabuli_Chr06              | 59407761                       | (G/A)       |
| 11626       | CakSNP11626    | <i>Kabuli</i>    | Ca_Kabuli_Chr06              | 59417984                       | (G/A)       |
| 11627       | CakSNP11627    | <i>Kabuli</i>    | Ca_Kabuli_Chr07              | 16760                          | (T/G)       |

| <b>S.N.</b> | <b>SNP IDs</b> | <b>Cultivars</b> | <b>Chromosomes/scaffolds</b> | <b>Physical positions (bp)</b> | <b>SNPs</b> |
|-------------|----------------|------------------|------------------------------|--------------------------------|-------------|
| 11628       | CakSNP11628    | <i>Kabuli</i>    | Ca_Kabuli_Chr07              | 16850                          | (C/T)       |
| 11629       | CakSNP11629    | <i>Kabuli</i>    | Ca_Kabuli_Chr07              | 16880                          | (G/A)       |
| 11630       | CakSNP11630    | <i>Kabuli</i>    | Ca_Kabuli_Chr07              | 16881                          | (A/G)       |
| 11631       | CakSNP11631    | <i>Kabuli</i>    | Ca_Kabuli_Chr07              | 41841                          | (G/A)       |
| 11632       | CakSNP11632    | <i>Kabuli</i>    | Ca_Kabuli_Chr07              | 55131                          | (T/C)       |
| 11633       | CakSNP11633    | <i>Kabuli</i>    | Ca_Kabuli_Chr07              | 208824                         | (A/G)       |
| 11634       | CakSNP11634    | <i>Kabuli</i>    | Ca_Kabuli_Chr07              | 218346                         | (C/A)       |
| 11635       | CakSNP11635    | <i>Kabuli</i>    | Ca_Kabuli_Chr07              | 218341                         | (C/G)       |
| 11636       | CakSNP11636    | <i>Kabuli</i>    | Ca_Kabuli_Chr07              | 419301                         | (C/T)       |
| 11637       | CakSNP11637    | <i>Kabuli</i>    | Ca_Kabuli_Chr07              | 419316                         | (A/G)       |
| 11638       | CakSNP11638    | <i>Kabuli</i>    | Ca_Kabuli_Chr07              | 419334                         | (A/C)       |
| 11639       | CakSNP11639    | <i>Kabuli</i>    | Ca_Kabuli_Chr07              | 419385                         | (T/G)       |
| 11640       | CakSNP11640    | <i>Kabuli</i>    | Ca_Kabuli_Chr07              | 419328                         | (C/T)       |
| 11641       | CakSNP11641    | <i>Kabuli</i>    | Ca_Kabuli_Chr07              | 419679                         | (C/T)       |
| 11642       | CakSNP11642    | <i>Kabuli</i>    | Ca_Kabuli_Chr07              | 419638                         | (C/T)       |
| 11643       | CakSNP11643    | <i>Kabuli</i>    | Ca_Kabuli_Chr07              | 419628                         | (A/C)       |
| 11644       | CakSNP11644    | <i>Kabuli</i>    | Ca_Kabuli_Chr07              | 528521                         | (G/A)       |
| 11645       | CakSNP11645    | <i>Kabuli</i>    | Ca_Kabuli_Chr07              | 601563                         | (T/A)       |
| 11646       | CakSNP11646    | <i>Kabuli</i>    | Ca_Kabuli_Chr07              | 601551                         | (T/C)       |
| 11647       | CakSNP11647    | <i>Kabuli</i>    | Ca_Kabuli_Chr07              | 601545                         | (C/T)       |
| 11648       | CakSNP11648    | <i>Kabuli</i>    | Ca_Kabuli_Chr07              | 601538                         | (C/A)       |
| 11649       | CakSNP11649    | <i>Kabuli</i>    | Ca_Kabuli_Chr07              | 601521                         | (G/A)       |
| 11650       | CakSNP11650    | <i>Kabuli</i>    | Ca_Kabuli_Chr07              | 601516                         | (G/A)       |
| 11651       | CakSNP11651    | <i>Kabuli</i>    | Ca_Kabuli_Chr07              | 601513                         | (C/G)       |
| 11652       | CakSNP11652    | <i>Kabuli</i>    | Ca_Kabuli_Chr07              | 601502                         | (G/T)       |
| 11653       | CakSNP11653    | <i>Kabuli</i>    | Ca_Kabuli_Chr07              | 601496                         | (C/T)       |
| 11654       | CakSNP11654    | <i>Kabuli</i>    | Ca_Kabuli_Chr07              | 601586                         | (C/T)       |
| 11655       | CakSNP11655    | <i>Kabuli</i>    | Ca_Kabuli_Chr07              | 601601                         | (C/T)       |
| 11656       | CakSNP11656    | <i>Kabuli</i>    | Ca_Kabuli_Chr07              | 601612                         | (A/G)       |
| 11657       | CakSNP11657    | <i>Kabuli</i>    | Ca_Kabuli_Chr07              | 601643                         | (G/T)       |
| 11658       | CakSNP11658    | <i>Kabuli</i>    | Ca_Kabuli_Chr07              | 601622                         | (G/C)       |
| 11659       | CakSNP11659    | <i>Kabuli</i>    | Ca_Kabuli_Chr07              | 601657                         | (C/T)       |
| 11660       | CakSNP11660    | <i>Kabuli</i>    | Ca_Kabuli_Chr07              | 601719                         | (G/T)       |
| 11661       | CakSNP11661    | <i>Kabuli</i>    | Ca_Kabuli_Chr07              | 601718                         | (G/C)       |
| 11662       | CakSNP11662    | <i>Kabuli</i>    | Ca_Kabuli_Chr07              | 601714                         | (A/T)       |
| 11663       | CakSNP11663    | <i>Kabuli</i>    | Ca_Kabuli_Chr07              | 601709                         | (A/C)       |
| 11664       | CakSNP11664    | <i>Kabuli</i>    | Ca_Kabuli_Chr07              | 601683                         | (G/A)       |
| 11665       | CakSNP11665    | <i>Kabuli</i>    | Ca_Kabuli_Chr07              | 601647                         | (C/T)       |

| <b>S.N.</b> | <b>SNP IDs</b> | <b>Cultivars</b> | <b>Chromosomes/scaffolds</b> | <b>Physical positions (bp)</b> | <b>SNPs</b> |
|-------------|----------------|------------------|------------------------------|--------------------------------|-------------|
| 11666       | CakSNP11666    | <i>Kabuli</i>    | Ca_Kabuli_Chr07              | 610737                         | (C/A)       |
| 11667       | CakSNP11667    | <i>Kabuli</i>    | Ca_Kabuli_Chr07              | 610723                         | (G/T)       |
| 11668       | CakSNP11668    | <i>Kabuli</i>    | Ca_Kabuli_Chr07              | 667597                         | (C/T)       |
| 11669       | CakSNP11669    | <i>Kabuli</i>    | Ca_Kabuli_Chr07              | 674791                         | (A/T)       |
| 11670       | CakSNP11670    | <i>Kabuli</i>    | Ca_Kabuli_Chr07              | 676785                         | (G/T)       |
| 11671       | CakSNP11671    | <i>Kabuli</i>    | Ca_Kabuli_Chr07              | 676786                         | (G/A)       |
| 11672       | CakSNP11672    | <i>Kabuli</i>    | Ca_Kabuli_Chr07              | 676790                         | (T/C)       |
| 11673       | CakSNP11673    | <i>Kabuli</i>    | Ca_Kabuli_Chr07              | 683245                         | (T/C)       |
| 11674       | CakSNP11674    | <i>Kabuli</i>    | Ca_Kabuli_Chr07              | 761710                         | (A/G)       |
| 11675       | CakSNP11675    | <i>Kabuli</i>    | Ca_Kabuli_Chr07              | 767708                         | (G/A)       |
| 11676       | CakSNP11676    | <i>Kabuli</i>    | Ca_Kabuli_Chr07              | 781377                         | (G/T)       |
| 11677       | CakSNP11677    | <i>Kabuli</i>    | Ca_Kabuli_Chr07              | 781409                         | (A/G)       |
| 11678       | CakSNP11678    | <i>Kabuli</i>    | Ca_Kabuli_Chr07              | 807095                         | (A/T)       |
| 11679       | CakSNP11679    | <i>Kabuli</i>    | Ca_Kabuli_Chr07              | 807110                         | (T/C)       |
| 11680       | CakSNP11680    | <i>Kabuli</i>    | Ca_Kabuli_Chr07              | 807133                         | (T/A)       |
| 11681       | CakSNP11681    | <i>Kabuli</i>    | Ca_Kabuli_Chr07              | 815477                         | (A/T)       |
| 11682       | CakSNP11682    | <i>Kabuli</i>    | Ca_Kabuli_Chr07              | 815526                         | (C/A)       |
| 11683       | CakSNP11683    | <i>Kabuli</i>    | Ca_Kabuli_Chr07              | 838581                         | (C/A)       |
| 11684       | CakSNP11684    | <i>Kabuli</i>    | Ca_Kabuli_Chr07              | 838651                         | (A/C)       |
| 11685       | CakSNP11685    | <i>Kabuli</i>    | Ca_Kabuli_Chr07              | 841988                         | (T/C)       |
| 11686       | CakSNP11686    | <i>Kabuli</i>    | Ca_Kabuli_Chr07              | 844248                         | (G/A)       |
| 11687       | CakSNP11687    | <i>Kabuli</i>    | Ca_Kabuli_Chr07              | 845488                         | (A/G)       |
| 11688       | CakSNP11688    | <i>Kabuli</i>    | Ca_Kabuli_Chr07              | 865007                         | (C/T)       |
| 11689       | CakSNP11689    | <i>Kabuli</i>    | Ca_Kabuli_Chr07              | 865170                         | (C/T)       |
| 11690       | CakSNP11690    | <i>Kabuli</i>    | Ca_Kabuli_Chr07              | 873207                         | (A/G)       |
| 11691       | CakSNP11691    | <i>Kabuli</i>    | Ca_Kabuli_Chr07              | 888900                         | (G/A)       |
| 11692       | CakSNP11692    | <i>Kabuli</i>    | Ca_Kabuli_Chr07              | 888987                         | (A/G)       |
| 11693       | CakSNP11693    | <i>Kabuli</i>    | Ca_Kabuli_Chr07              | 975236                         | (T/A)       |
| 11694       | CakSNP11694    | <i>Kabuli</i>    | Ca_Kabuli_Chr07              | 993031                         | (G/T)       |
| 11695       | CakSNP11695    | <i>Kabuli</i>    | Ca_Kabuli_Chr07              | 994976                         | (G/A)       |
| 11696       | CakSNP11696    | <i>Kabuli</i>    | Ca_Kabuli_Chr07              | 995691                         | (C/T)       |
| 11697       | CakSNP11697    | <i>Kabuli</i>    | Ca_Kabuli_Chr07              | 995674                         | (T/C)       |
| 11698       | CakSNP11698    | <i>Kabuli</i>    | Ca_Kabuli_Chr07              | 1022946                        | (C/T)       |
| 11699       | CakSNP11699    | <i>Kabuli</i>    | Ca_Kabuli_Chr07              | 1045113                        | (A/C)       |
| 11700       | CakSNP11700    | <i>Kabuli</i>    | Ca_Kabuli_Chr07              | 1045127                        | (T/A)       |
| 11701       | CakSNP11701    | <i>Kabuli</i>    | Ca_Kabuli_Chr07              | 1096379                        | (C/T)       |
| 11702       | CakSNP11702    | <i>Kabuli</i>    | Ca_Kabuli_Chr07              | 1153267                        | (A/C)       |
| 11703       | CakSNP11703    | <i>Kabuli</i>    | Ca_Kabuli_Chr07              | 1174188                        | (C/T)       |

| <b>S.N.</b> | <b>SNP IDs</b> | <b>Cultivars</b> | <b>Chromosomes/scaffolds</b> | <b>Physical positions (bp)</b> | <b>SNPs</b> |
|-------------|----------------|------------------|------------------------------|--------------------------------|-------------|
| 11704       | CakSNP11704    | <i>Kabuli</i>    | Ca_Kabuli_Chr07              | 1293601                        | (C/G)       |
| 11705       | CakSNP11705    | <i>Kabuli</i>    | Ca_Kabuli_Chr07              | 1350605                        | (C/T)       |
| 11706       | CakSNP11706    | <i>Kabuli</i>    | Ca_Kabuli_Chr07              | 1350856                        | (G/T)       |
| 11707       | CakSNP11707    | <i>Kabuli</i>    | Ca_Kabuli_Chr07              | 1350846                        | (A/T)       |
| 11708       | CakSNP11708    | <i>Kabuli</i>    | Ca_Kabuli_Chr07              | 1350947                        | (T/G)       |
| 11709       | CakSNP11709    | <i>Kabuli</i>    | Ca_Kabuli_Chr07              | 1414206                        | (C/A)       |
| 11710       | CakSNP11710    | <i>Kabuli</i>    | Ca_Kabuli_Chr07              | 1505646                        | (G/A)       |
| 11711       | CakSNP11711    | <i>Kabuli</i>    | Ca_Kabuli_Chr07              | 1509156                        | (G/A)       |
| 11712       | CakSNP11712    | <i>Kabuli</i>    | Ca_Kabuli_Chr07              | 1511252                        | (C/T)       |
| 11713       | CakSNP11713    | <i>Kabuli</i>    | Ca_Kabuli_Chr07              | 1585622                        | (T/C)       |
| 11714       | CakSNP11714    | <i>Kabuli</i>    | Ca_Kabuli_Chr07              | 1635519                        | (G/A)       |
| 11715       | CakSNP11715    | <i>Kabuli</i>    | Ca_Kabuli_Chr07              | 1635471                        | (G/T)       |
| 11716       | CakSNP11716    | <i>Kabuli</i>    | Ca_Kabuli_Chr07              | 1702033                        | (G/T)       |
| 11717       | CakSNP11717    | <i>Kabuli</i>    | Ca_Kabuli_Chr07              | 1702063                        | (A/G)       |
| 11718       | CakSNP11718    | <i>Kabuli</i>    | Ca_Kabuli_Chr07              | 1702077                        | (G/C)       |
| 11719       | CakSNP11719    | <i>Kabuli</i>    | Ca_Kabuli_Chr07              | 1704780                        | (T/G)       |
| 11720       | CakSNP11720    | <i>Kabuli</i>    | Ca_Kabuli_Chr07              | 1704802                        | (A/G)       |
| 11721       | CakSNP11721    | <i>Kabuli</i>    | Ca_Kabuli_Chr07              | 1704892                        | (A/G)       |
| 11722       | CakSNP11722    | <i>Kabuli</i>    | Ca_Kabuli_Chr07              | 1704947                        | (C/T)       |
| 11723       | CakSNP11723    | <i>Kabuli</i>    | Ca_Kabuli_Chr07              | 1705197                        | (A/C)       |
| 11724       | CakSNP11724    | <i>Kabuli</i>    | Ca_Kabuli_Chr07              | 1707283                        | (G/T)       |
| 11725       | CakSNP11725    | <i>Kabuli</i>    | Ca_Kabuli_Chr07              | 1707375                        | (C/G)       |
| 11726       | CakSNP11726    | <i>Kabuli</i>    | Ca_Kabuli_Chr07              | 1739369                        | (C/A)       |
| 11727       | CakSNP11727    | <i>Kabuli</i>    | Ca_Kabuli_Chr07              | 1787308                        | (T/A)       |
| 11728       | CakSNP11728    | <i>Kabuli</i>    | Ca_Kabuli_Chr07              | 1787417                        | (G/A)       |
| 11729       | CakSNP11729    | <i>Kabuli</i>    | Ca_Kabuli_Chr07              | 1946020                        | (G/A)       |
| 11730       | CakSNP11730    | <i>Kabuli</i>    | Ca_Kabuli_Chr07              | 1963659                        | (T/A)       |
| 11731       | CakSNP11731    | <i>Kabuli</i>    | Ca_Kabuli_Chr07              | 1963757                        | (A/G)       |
| 11732       | CakSNP11732    | <i>Kabuli</i>    | Ca_Kabuli_Chr07              | 1991642                        | (G/T)       |
| 11733       | CakSNP11733    | <i>Kabuli</i>    | Ca_Kabuli_Chr07              | 2012854                        | (T/A)       |
| 11734       | CakSNP11734    | <i>Kabuli</i>    | Ca_Kabuli_Chr07              | 2103626                        | (C/T)       |
| 11735       | CakSNP11735    | <i>Kabuli</i>    | Ca_Kabuli_Chr07              | 2106876                        | (C/A)       |
| 11736       | CakSNP11736    | <i>Kabuli</i>    | Ca_Kabuli_Chr07              | 2106917                        | (A/T)       |
| 11737       | CakSNP11737    | <i>Kabuli</i>    | Ca_Kabuli_Chr07              | 2146554                        | (G/A)       |
| 11738       | CakSNP11738    | <i>Kabuli</i>    | Ca_Kabuli_Chr07              | 2167517                        | (A/C)       |
| 11739       | CakSNP11739    | <i>Kabuli</i>    | Ca_Kabuli_Chr07              | 2167540                        | (G/C)       |
| 11740       | CakSNP11740    | <i>Kabuli</i>    | Ca_Kabuli_Chr07              | 2211897                        | (G/A)       |
| 11741       | CakSNP11741    | <i>Kabuli</i>    | Ca_Kabuli_Chr07              | 2219764                        | (C/T)       |

| <b>S.N.</b> | <b>SNP IDs</b> | <b>Cultivars</b> | <b>Chromosomes/scaffolds</b> | <b>Physical positions (bp)</b> | <b>SNPs</b> |
|-------------|----------------|------------------|------------------------------|--------------------------------|-------------|
| 11742       | CakSNP11742    | <i>Kabuli</i>    | Ca_Kabuli_Chr07              | 2230434                        | (A/G)       |
| 11743       | CakSNP11743    | <i>Kabuli</i>    | Ca_Kabuli_Chr07              | 2262749                        | (C/G)       |
| 11744       | CakSNP11744    | <i>Kabuli</i>    | Ca_Kabuli_Chr07              | 2262865                        | (A/G)       |
| 11745       | CakSNP11745    | <i>Kabuli</i>    | Ca_Kabuli_Chr07              | 2262843                        | (T/A)       |
| 11746       | CakSNP11746    | <i>Kabuli</i>    | Ca_Kabuli_Chr07              | 2361064                        | (T/G)       |
| 11747       | CakSNP11747    | <i>Kabuli</i>    | Ca_Kabuli_Chr07              | 2387109                        | (C/T)       |
| 11748       | CakSNP11748    | <i>Kabuli</i>    | Ca_Kabuli_Chr07              | 2391392                        | (G/A)       |
| 11749       | CakSNP11749    | <i>Kabuli</i>    | Ca_Kabuli_Chr07              | 2401235                        | (T/C)       |
| 11750       | CakSNP11750    | <i>Kabuli</i>    | Ca_Kabuli_Chr07              | 2493033                        | (A/G)       |
| 11751       | CakSNP11751    | <i>Kabuli</i>    | Ca_Kabuli_Chr07              | 2538167                        | (C/G)       |
| 11752       | CakSNP11752    | <i>Kabuli</i>    | Ca_Kabuli_Chr07              | 2541501                        | (A/G)       |
| 11753       | CakSNP11753    | <i>Kabuli</i>    | Ca_Kabuli_Chr07              | 2541551                        | (G/A)       |
| 11754       | CakSNP11754    | <i>Kabuli</i>    | Ca_Kabuli_Chr07              | 2541653                        | (C/G)       |
| 11755       | CakSNP11755    | <i>Kabuli</i>    | Ca_Kabuli_Chr07              | 2545613                        | (T/C)       |
| 11756       | CakSNP11756    | <i>Kabuli</i>    | Ca_Kabuli_Chr07              | 2552454                        | (G/T)       |
| 11757       | CakSNP11757    | <i>Kabuli</i>    | Ca_Kabuli_Chr07              | 2603595                        | (C/T)       |
| 11758       | CakSNP11758    | <i>Kabuli</i>    | Ca_Kabuli_Chr07              | 2603633                        | (C/T)       |
| 11759       | CakSNP11759    | <i>Kabuli</i>    | Ca_Kabuli_Chr07              | 2603649                        | (T/C)       |
| 11760       | CakSNP11760    | <i>Kabuli</i>    | Ca_Kabuli_Chr07              | 2609831                        | (C/A)       |
| 11761       | CakSNP11761    | <i>Kabuli</i>    | Ca_Kabuli_Chr07              | 2618478                        | (C/T)       |
| 11762       | CakSNP11762    | <i>Kabuli</i>    | Ca_Kabuli_Chr07              | 2654442                        | (T/G)       |
| 11763       | CakSNP11763    | <i>Kabuli</i>    | Ca_Kabuli_Chr07              | 2654478                        | (C/T)       |
| 11764       | CakSNP11764    | <i>Kabuli</i>    | Ca_Kabuli_Chr07              | 2684213                        | (A/G)       |
| 11765       | CakSNP11765    | <i>Kabuli</i>    | Ca_Kabuli_Chr07              | 2734680                        | (A/G)       |
| 11766       | CakSNP11766    | <i>Kabuli</i>    | Ca_Kabuli_Chr07              | 2734625                        | (C/T)       |
| 11767       | CakSNP11767    | <i>Kabuli</i>    | Ca_Kabuli_Chr07              | 2745665                        | (A/C)       |
| 11768       | CakSNP11768    | <i>Kabuli</i>    | Ca_Kabuli_Chr07              | 2745656                        | (A/C)       |
| 11769       | CakSNP11769    | <i>Kabuli</i>    | Ca_Kabuli_Chr07              | 2757260                        | (C/T)       |
| 11770       | CakSNP11770    | <i>Kabuli</i>    | Ca_Kabuli_Chr07              | 2757255                        | (G/C)       |
| 11771       | CakSNP11771    | <i>Kabuli</i>    | Ca_Kabuli_Chr07              | 2757253                        | (T/G)       |
| 11772       | CakSNP11772    | <i>Kabuli</i>    | Ca_Kabuli_Chr07              | 2762396                        | (G/A)       |
| 11773       | CakSNP11773    | <i>Kabuli</i>    | Ca_Kabuli_Chr07              | 2762406                        | (C/T)       |
| 11774       | CakSNP11774    | <i>Kabuli</i>    | Ca_Kabuli_Chr07              | 2762423                        | (G/A)       |
| 11775       | CakSNP11775    | <i>Kabuli</i>    | Ca_Kabuli_Chr07              | 2832369                        | (C/T)       |
| 11776       | CakSNP11776    | <i>Kabuli</i>    | Ca_Kabuli_Chr07              | 2857630                        | (T/G)       |
| 11777       | CakSNP11777    | <i>Kabuli</i>    | Ca_Kabuli_Chr07              | 2857818                        | (T/A)       |
| 11778       | CakSNP11778    | <i>Kabuli</i>    | Ca_Kabuli_Chr07              | 2857844                        | (C/T)       |
| 11779       | CakSNP11779    | <i>Kabuli</i>    | Ca_Kabuli_Chr07              | 2909641                        | (A/G)       |



| <b>S.N.</b> | <b>SNP IDs</b> | <b>Cultivars</b> | <b>Chromosomes/scaffolds</b> | <b>Physical positions (bp)</b> | <b>SNPs</b> |
|-------------|----------------|------------------|------------------------------|--------------------------------|-------------|
| 11780       | CakSNP11780    | <i>Kabuli</i>    | Ca_Kabuli_Chr07              | 2915375                        | (C/G)       |
| 11781       | CakSNP11781    | <i>Kabuli</i>    | Ca_Kabuli_Chr07              | 2932309                        | (C/G)       |
| 11782       | CakSNP11782    | <i>Kabuli</i>    | Ca_Kabuli_Chr07              | 2932301                        | (C/A)       |
| 11783       | CakSNP11783    | <i>Kabuli</i>    | Ca_Kabuli_Chr07              | 2932377                        | (C/T)       |
| 11784       | CakSNP11784    | <i>Kabuli</i>    | Ca_Kabuli_Chr07              | 2956665                        | (C/T)       |
| 11785       | CakSNP11785    | <i>Kabuli</i>    | Ca_Kabuli_Chr07              | 2956767                        | (A/G)       |
| 11786       | CakSNP11786    | <i>Kabuli</i>    | Ca_Kabuli_Chr07              | 2969653                        | (A/G)       |
| 11787       | CakSNP11787    | <i>Kabuli</i>    | Ca_Kabuli_Chr07              | 2997261                        | (A/G)       |
| 11788       | CakSNP11788    | <i>Kabuli</i>    | Ca_Kabuli_Chr07              | 3023182                        | (T/C)       |
| 11789       | CakSNP11789    | <i>Kabuli</i>    | Ca_Kabuli_Chr07              | 3023154                        | (T/C)       |
| 11790       | CakSNP11790    | <i>Kabuli</i>    | Ca_Kabuli_Chr07              | 3070531                        | (A/C)       |
| 11791       | CakSNP11791    | <i>Kabuli</i>    | Ca_Kabuli_Chr07              | 3090898                        | (G/A)       |
| 11792       | CakSNP11792    | <i>Kabuli</i>    | Ca_Kabuli_Chr07              | 3093884                        | (T/A)       |
| 11793       | CakSNP11793    | <i>Kabuli</i>    | Ca_Kabuli_Chr07              | 3093953                        | (T/G)       |
| 11794       | CakSNP11794    | <i>Kabuli</i>    | Ca_Kabuli_Chr07              | 3094090                        | (G/A)       |
| 11795       | CakSNP11795    | <i>Kabuli</i>    | Ca_Kabuli_Chr07              | 3094087                        | (A/G)       |
| 11796       | CakSNP11796    | <i>Kabuli</i>    | Ca_Kabuli_Chr07              | 3107197                        | (C/T)       |
| 11797       | CakSNP11797    | <i>Kabuli</i>    | Ca_Kabuli_Chr07              | 3107239                        | (T/A)       |
| 11798       | CakSNP11798    | <i>Kabuli</i>    | Ca_Kabuli_Chr07              | 3109250                        | (T/C)       |
| 11799       | CakSNP11799    | <i>Kabuli</i>    | Ca_Kabuli_Chr07              | 3109352                        | (T/C)       |
| 11800       | CakSNP11800    | <i>Kabuli</i>    | Ca_Kabuli_Chr07              | 3110316                        | (A/G)       |
| 11801       | CakSNP11801    | <i>Kabuli</i>    | Ca_Kabuli_Chr07              | 3130070                        | (A/G)       |
| 11802       | CakSNP11802    | <i>Kabuli</i>    | Ca_Kabuli_Chr07              | 3130069                        | (A/G)       |
| 11803       | CakSNP11803    | <i>Kabuli</i>    | Ca_Kabuli_Chr07              | 3143409                        | (C/T)       |
| 11804       | CakSNP11804    | <i>Kabuli</i>    | Ca_Kabuli_Chr07              | 3186341                        | (C/T)       |
| 11805       | CakSNP11805    | <i>Kabuli</i>    | Ca_Kabuli_Chr07              | 3186262                        | (T/G)       |
| 11806       | CakSNP11806    | <i>Kabuli</i>    | Ca_Kabuli_Chr07              | 3198197                        | (C/A)       |
| 11807       | CakSNP11807    | <i>Kabuli</i>    | Ca_Kabuli_Chr07              | 3198263                        | (T/C)       |
| 11808       | CakSNP11808    | <i>Kabuli</i>    | Ca_Kabuli_Chr07              | 3217916                        | (T/G)       |
| 11809       | CakSNP11809    | <i>Kabuli</i>    | Ca_Kabuli_Chr07              | 3236150                        | (A/C)       |
| 11810       | CakSNP11810    | <i>Kabuli</i>    | Ca_Kabuli_Chr07              | 3265823                        | (A/G)       |
| 11811       | CakSNP11811    | <i>Kabuli</i>    | Ca_Kabuli_Chr07              | 3297560                        | (G/A)       |
| 11812       | CakSNP11812    | <i>Kabuli</i>    | Ca_Kabuli_Chr07              | 3297677                        | (G/T)       |
| 11813       | CakSNP11813    | <i>Kabuli</i>    | Ca_Kabuli_Chr07              | 3315157                        | (A/G)       |
| 11814       | CakSNP11814    | <i>Kabuli</i>    | Ca_Kabuli_Chr07              | 3351037                        | (G/T)       |
| 11815       | CakSNP11815    | <i>Kabuli</i>    | Ca_Kabuli_Chr07              | 3353095                        | (C/T)       |
| 11816       | CakSNP11816    | <i>Kabuli</i>    | Ca_Kabuli_Chr07              | 3355627                        | (A/G)       |
| 11817       | CakSNP11817    | <i>Kabuli</i>    | Ca_Kabuli_Chr07              | 3355763                        | (A/G)       |

| <b>S.N.</b> | <b>SNP IDs</b> | <b>Cultivars</b> | <b>Chromosomes/scaffolds</b> | <b>Physical positions (bp)</b> | <b>SNPs</b> |
|-------------|----------------|------------------|------------------------------|--------------------------------|-------------|
| 11818       | CakSNP11818    | <i>Kabuli</i>    | Ca_Kabuli_Chr07              | 3356399                        | (G/A)       |
| 11819       | CakSNP11819    | <i>Kabuli</i>    | Ca_Kabuli_Chr07              | 3357452                        | (G/A)       |
| 11820       | CakSNP11820    | <i>Kabuli</i>    | Ca_Kabuli_Chr07              | 3430492                        | (A/T)       |
| 11821       | CakSNP11821    | <i>Kabuli</i>    | Ca_Kabuli_Chr07              | 3430479                        | (G/A)       |
| 11822       | CakSNP11822    | <i>Kabuli</i>    | Ca_Kabuli_Chr07              | 3445031                        | (T/C)       |
| 11823       | CakSNP11823    | <i>Kabuli</i>    | Ca_Kabuli_Chr07              | 3476546                        | (T/C)       |
| 11824       | CakSNP11824    | <i>Kabuli</i>    | Ca_Kabuli_Chr07              | 3504900                        | (G/A)       |
| 11825       | CakSNP11825    | <i>Kabuli</i>    | Ca_Kabuli_Chr07              | 3505012                        | (A/C)       |
| 11826       | CakSNP11826    | <i>Kabuli</i>    | Ca_Kabuli_Chr07              | 3518048                        | (G/A)       |
| 11827       | CakSNP11827    | <i>Kabuli</i>    | Ca_Kabuli_Chr07              | 3519510                        | (A/G)       |
| 11828       | CakSNP11828    | <i>Kabuli</i>    | Ca_Kabuli_Chr07              | 3519701                        | (A/C)       |
| 11829       | CakSNP11829    | <i>Kabuli</i>    | Ca_Kabuli_Chr07              | 3521150                        | (A/G)       |
| 11830       | CakSNP11830    | <i>Kabuli</i>    | Ca_Kabuli_Chr07              | 3521257                        | (G/A)       |
| 11831       | CakSNP11831    | <i>Kabuli</i>    | Ca_Kabuli_Chr07              | 3521192                        | (C/A)       |
| 11832       | CakSNP11832    | <i>Kabuli</i>    | Ca_Kabuli_Chr07              | 3536194                        | (C/T)       |
| 11833       | CakSNP11833    | <i>Kabuli</i>    | Ca_Kabuli_Chr07              | 3536233                        | (T/C)       |
| 11834       | CakSNP11834    | <i>Kabuli</i>    | Ca_Kabuli_Chr07              | 3543765                        | (A/G)       |
| 11835       | CakSNP11835    | <i>Kabuli</i>    | Ca_Kabuli_Chr07              | 3543768                        | (T/C)       |
| 11836       | CakSNP11836    | <i>Kabuli</i>    | Ca_Kabuli_Chr07              | 3557570                        | (C/T)       |
| 11837       | CakSNP11837    | <i>Kabuli</i>    | Ca_Kabuli_Chr07              | 3560182                        | (G/A)       |
| 11838       | CakSNP11838    | <i>Kabuli</i>    | Ca_Kabuli_Chr07              | 3560250                        | (C/T)       |
| 11839       | CakSNP11839    | <i>Kabuli</i>    | Ca_Kabuli_Chr07              | 3572963                        | (T/C)       |
| 11840       | CakSNP11840    | <i>Kabuli</i>    | Ca_Kabuli_Chr07              | 3581123                        | (G/A)       |
| 11841       | CakSNP11841    | <i>Kabuli</i>    | Ca_Kabuli_Chr07              | 3600826                        | (C/T)       |
| 11842       | CakSNP11842    | <i>Kabuli</i>    | Ca_Kabuli_Chr07              | 3600833                        | (T/G)       |
| 11843       | CakSNP11843    | <i>Kabuli</i>    | Ca_Kabuli_Chr07              | 3600866                        | (T/C)       |
| 11844       | CakSNP11844    | <i>Kabuli</i>    | Ca_Kabuli_Chr07              | 3600867                        | (C/T)       |
| 11845       | CakSNP11845    | <i>Kabuli</i>    | Ca_Kabuli_Chr07              | 3600987                        | (A/C)       |
| 11846       | CakSNP11846    | <i>Kabuli</i>    | Ca_Kabuli_Chr07              | 3628086                        | (G/A)       |
| 11847       | CakSNP11847    | <i>Kabuli</i>    | Ca_Kabuli_Chr07              | 3635307                        | (G/A)       |
| 11848       | CakSNP11848    | <i>Kabuli</i>    | Ca_Kabuli_Chr07              | 3635309                        | (C/T)       |
| 11849       | CakSNP11849    | <i>Kabuli</i>    | Ca_Kabuli_Chr07              | 3635318                        | (T/A)       |
| 11850       | CakSNP11850    | <i>Kabuli</i>    | Ca_Kabuli_Chr07              | 3635325                        | (T/C)       |
| 11851       | CakSNP11851    | <i>Kabuli</i>    | Ca_Kabuli_Chr07              | 3635369                        | (G/T)       |
| 11852       | CakSNP11852    | <i>Kabuli</i>    | Ca_Kabuli_Chr07              | 3651051                        | (T/C)       |
| 11853       | CakSNP11853    | <i>Kabuli</i>    | Ca_Kabuli_Chr07              | 3655451                        | (G/T)       |
| 11854       | CakSNP11854    | <i>Kabuli</i>    | Ca_Kabuli_Chr07              | 3665651                        | (G/C)       |
| 11855       | CakSNP11855    | <i>Kabuli</i>    | Ca_Kabuli_Chr07              | 3672192                        | (T/C)       |

| <b>S.N.</b> | <b>SNP IDs</b> | <b>Cultivars</b> | <b>Chromosomes/scaffolds</b> | <b>Physical positions (bp)</b> | <b>SNPs</b> |
|-------------|----------------|------------------|------------------------------|--------------------------------|-------------|
| 11856       | CakSNP11856    | <i>Kabuli</i>    | Ca_Kabuli_Chr07              | 3672236                        | (G/A)       |
| 11857       | CakSNP11857    | <i>Kabuli</i>    | Ca_Kabuli_Chr07              | 3734030                        | (T/A)       |
| 11858       | CakSNP11858    | <i>Kabuli</i>    | Ca_Kabuli_Chr07              | 3738769                        | (T/C)       |
| 11859       | CakSNP11859    | <i>Kabuli</i>    | Ca_Kabuli_Chr07              | 3754778                        | (G/A)       |
| 11860       | CakSNP11860    | <i>Kabuli</i>    | Ca_Kabuli_Chr07              | 3754743                        | (G/C)       |
| 11861       | CakSNP11861    | <i>Kabuli</i>    | Ca_Kabuli_Chr07              | 3795825                        | (T/C)       |
| 11862       | CakSNP11862    | <i>Kabuli</i>    | Ca_Kabuli_Chr07              | 3795798                        | (G/A)       |
| 11863       | CakSNP11863    | <i>Kabuli</i>    | Ca_Kabuli_Chr07              | 3795776                        | (C/A)       |
| 11864       | CakSNP11864    | <i>Kabuli</i>    | Ca_Kabuli_Chr07              | 3796826                        | (A/G)       |
| 11865       | CakSNP11865    | <i>Kabuli</i>    | Ca_Kabuli_Chr07              | 3796894                        | (A/G)       |
| 11866       | CakSNP11866    | <i>Kabuli</i>    | Ca_Kabuli_Chr07              | 3802188                        | (T/A)       |
| 11867       | CakSNP11867    | <i>Kabuli</i>    | Ca_Kabuli_Chr07              | 3814791                        | (A/G)       |
| 11868       | CakSNP11868    | <i>Kabuli</i>    | Ca_Kabuli_Chr07              | 3817087                        | (C/T)       |
| 11869       | CakSNP11869    | <i>Kabuli</i>    | Ca_Kabuli_Chr07              | 3817733                        | (T/G)       |
| 11870       | CakSNP11870    | <i>Kabuli</i>    | Ca_Kabuli_Chr07              | 3817740                        | (G/T)       |
| 11871       | CakSNP11871    | <i>Kabuli</i>    | Ca_Kabuli_Chr07              | 3829115                        | (C/T)       |
| 11872       | CakSNP11872    | <i>Kabuli</i>    | Ca_Kabuli_Chr07              | 3843168                        | (A/T)       |
| 11873       | CakSNP11873    | <i>Kabuli</i>    | Ca_Kabuli_Chr07              | 3845953                        | (A/C)       |
| 11874       | CakSNP11874    | <i>Kabuli</i>    | Ca_Kabuli_Chr07              | 3845958                        | (G/A)       |
| 11875       | CakSNP11875    | <i>Kabuli</i>    | Ca_Kabuli_Chr07              | 3845996                        | (G/A)       |
| 11876       | CakSNP11876    | <i>Kabuli</i>    | Ca_Kabuli_Chr07              | 3856308                        | (C/T)       |
| 11877       | CakSNP11877    | <i>Kabuli</i>    | Ca_Kabuli_Chr07              | 3859451                        | (G/A)       |
| 11878       | CakSNP11878    | <i>Kabuli</i>    | Ca_Kabuli_Chr07              | 3916849                        | (A/C)       |
| 11879       | CakSNP11879    | <i>Kabuli</i>    | Ca_Kabuli_Chr07              | 3924920                        | (T/C)       |
| 11880       | CakSNP11880    | <i>Kabuli</i>    | Ca_Kabuli_Chr07              | 3946712                        | (G/A)       |
| 11881       | CakSNP11881    | <i>Kabuli</i>    | Ca_Kabuli_Chr07              | 3982635                        | (T/G)       |
| 11882       | CakSNP11882    | <i>Kabuli</i>    | Ca_Kabuli_Chr07              | 3982622                        | (G/A)       |
| 11883       | CakSNP11883    | <i>Kabuli</i>    | Ca_Kabuli_Chr07              | 4017780                        | (C/T)       |
| 11884       | CakSNP11884    | <i>Kabuli</i>    | Ca_Kabuli_Chr07              | 4017851                        | (T/C)       |
| 11885       | CakSNP11885    | <i>Kabuli</i>    | Ca_Kabuli_Chr07              | 4039347                        | (C/A)       |
| 11886       | CakSNP11886    | <i>Kabuli</i>    | Ca_Kabuli_Chr07              | 4039300                        | (T/C)       |
| 11887       | CakSNP11887    | <i>Kabuli</i>    | Ca_Kabuli_Chr07              | 4039290                        | (A/G)       |
| 11888       | CakSNP11888    | <i>Kabuli</i>    | Ca_Kabuli_Chr07              | 4042123                        | (T/G)       |
| 11889       | CakSNP11889    | <i>Kabuli</i>    | Ca_Kabuli_Chr07              | 4095293                        | (A/G)       |
| 11890       | CakSNP11890    | <i>Kabuli</i>    | Ca_Kabuli_Chr07              | 4168933                        | (G/T)       |
| 11891       | CakSNP11891    | <i>Kabuli</i>    | Ca_Kabuli_Chr07              | 4194809                        | (T/A)       |
| 11892       | CakSNP11892    | <i>Kabuli</i>    | Ca_Kabuli_Chr07              | 4194890                        | (C/A)       |
| 11893       | CakSNP11893    | <i>Kabuli</i>    | Ca_Kabuli_Chr07              | 4194891                        | (C/G)       |

| <b>S.N.</b> | <b>SNP IDs</b> | <b>Cultivars</b> | <b>Chromosomes/scaffolds</b> | <b>Physical positions (bp)</b> | <b>SNPs</b> |
|-------------|----------------|------------------|------------------------------|--------------------------------|-------------|
| 11894       | CakSNP11894    | <i>Kabuli</i>    | Ca_Kabuli_Chr07              | 4198812                        | (A/C)       |
| 11895       | CakSNP11895    | <i>Kabuli</i>    | Ca_Kabuli_Chr07              | 4209425                        | (C/T)       |
| 11896       | CakSNP11896    | <i>Kabuli</i>    | Ca_Kabuli_Chr07              | 4209465                        | (A/C)       |
| 11897       | CakSNP11897    | <i>Kabuli</i>    | Ca_Kabuli_Chr07              | 4225314                        | (T/C)       |
| 11898       | CakSNP11898    | <i>Kabuli</i>    | Ca_Kabuli_Chr07              | 4256529                        | (G/A)       |
| 11899       | CakSNP11899    | <i>Kabuli</i>    | Ca_Kabuli_Chr07              | 4256703                        | (C/G)       |
| 11900       | CakSNP11900    | <i>Kabuli</i>    | Ca_Kabuli_Chr07              | 4257726                        | (A/T)       |
| 11901       | CakSNP11901    | <i>Kabuli</i>    | Ca_Kabuli_Chr07              | 4257727                        | (T/A)       |
| 11902       | CakSNP11902    | <i>Kabuli</i>    | Ca_Kabuli_Chr07              | 4257838                        | (C/T)       |
| 11903       | CakSNP11903    | <i>Kabuli</i>    | Ca_Kabuli_Chr07              | 4257830                        | (G/T)       |
| 11904       | CakSNP11904    | <i>Kabuli</i>    | Ca_Kabuli_Chr07              | 4257799                        | (G/A)       |
| 11905       | CakSNP11905    | <i>Kabuli</i>    | Ca_Kabuli_Chr07              | 4289975                        | (G/A)       |
| 11906       | CakSNP11906    | <i>Kabuli</i>    | Ca_Kabuli_Chr07              | 4300525                        | (C/T)       |
| 11907       | CakSNP11907    | <i>Kabuli</i>    | Ca_Kabuli_Chr07              | 4300650                        | (T/C)       |
| 11908       | CakSNP11908    | <i>Kabuli</i>    | Ca_Kabuli_Chr07              | 4300645                        | (C/T)       |
| 11909       | CakSNP11909    | <i>Kabuli</i>    | Ca_Kabuli_Chr07              | 4300592                        | (G/A)       |
| 11910       | CakSNP11910    | <i>Kabuli</i>    | Ca_Kabuli_Chr07              | 4300584                        | (C/T)       |
| 11911       | CakSNP11911    | <i>Kabuli</i>    | Ca_Kabuli_Chr07              | 4305424                        | (G/T)       |
| 11912       | CakSNP11912    | <i>Kabuli</i>    | Ca_Kabuli_Chr07              | 4431138                        | (A/G)       |
| 11913       | CakSNP11913    | <i>Kabuli</i>    | Ca_Kabuli_Chr07              | 4431253                        | (T/C)       |
| 11914       | CakSNP11914    | <i>Kabuli</i>    | Ca_Kabuli_Chr07              | 4438929                        | (A/G)       |
| 11915       | CakSNP11915    | <i>Kabuli</i>    | Ca_Kabuli_Chr07              | 4455045                        | (T/C)       |
| 11916       | CakSNP11916    | <i>Kabuli</i>    | Ca_Kabuli_Chr07              | 4461990                        | (A/C)       |
| 11917       | CakSNP11917    | <i>Kabuli</i>    | Ca_Kabuli_Chr07              | 4470285                        | (C/G)       |
| 11918       | CakSNP11918    | <i>Kabuli</i>    | Ca_Kabuli_Chr07              | 4490514                        | (G/A)       |
| 11919       | CakSNP11919    | <i>Kabuli</i>    | Ca_Kabuli_Chr07              | 4490964                        | (G/T)       |
| 11920       | CakSNP11920    | <i>Kabuli</i>    | Ca_Kabuli_Chr07              | 4490966                        | (A/G)       |
| 11921       | CakSNP11921    | <i>Kabuli</i>    | Ca_Kabuli_Chr07              | 4497784                        | (C/T)       |
| 11922       | CakSNP11922    | <i>Kabuli</i>    | Ca_Kabuli_Chr07              | 4520606                        | (T/C)       |
| 11923       | CakSNP11923    | <i>Kabuli</i>    | Ca_Kabuli_Chr07              | 4525645                        | (A/G)       |
| 11924       | CakSNP11924    | <i>Kabuli</i>    | Ca_Kabuli_Chr07              | 4552790                        | (T/C)       |
| 11925       | CakSNP11925    | <i>Kabuli</i>    | Ca_Kabuli_Chr07              | 4573236                        | (G/A)       |
| 11926       | CakSNP11926    | <i>Kabuli</i>    | Ca_Kabuli_Chr07              | 4625723                        | (C/T)       |
| 11927       | CakSNP11927    | <i>Kabuli</i>    | Ca_Kabuli_Chr07              | 4648569                        | (A/C)       |
| 11928       | CakSNP11928    | <i>Kabuli</i>    | Ca_Kabuli_Chr07              | 4648697                        | (T/A)       |
| 11929       | CakSNP11929    | <i>Kabuli</i>    | Ca_Kabuli_Chr07              | 4648677                        | (A/T)       |
| 11930       | CakSNP11930    | <i>Kabuli</i>    | Ca_Kabuli_Chr07              | 4648662                        | (G/A)       |
| 11931       | CakSNP11931    | <i>Kabuli</i>    | Ca_Kabuli_Chr07              | 4649287                        | (A/G)       |

| <b>S.N.</b> | <b>SNP IDs</b> | <b>Cultivars</b> | <b>Chromosomes/scaffolds</b> | <b>Physical positions (bp)</b> | <b>SNPs</b> |
|-------------|----------------|------------------|------------------------------|--------------------------------|-------------|
| 11932       | CakSNP11932    | <i>Kabuli</i>    | Ca_Kabuli_Chr07              | 4651931                        | (T/C)       |
| 11933       | CakSNP11933    | <i>Kabuli</i>    | Ca_Kabuli_Chr07              | 4652083                        | (G/A)       |
| 11934       | CakSNP11934    | <i>Kabuli</i>    | Ca_Kabuli_Chr07              | 4653235                        | (A/C)       |
| 11935       | CakSNP11935    | <i>Kabuli</i>    | Ca_Kabuli_Chr07              | 4700570                        | (C/A)       |
| 11936       | CakSNP11936    | <i>Kabuli</i>    | Ca_Kabuli_Chr07              | 4749212                        | (T/G)       |
| 11937       | CakSNP11937    | <i>Kabuli</i>    | Ca_Kabuli_Chr07              | 4752954                        | (G/C)       |
| 11938       | CakSNP11938    | <i>Kabuli</i>    | Ca_Kabuli_Chr07              | 4752887                        | (T/G)       |
| 11939       | CakSNP11939    | <i>Kabuli</i>    | Ca_Kabuli_Chr07              | 4756338                        | (G/A)       |
| 11940       | CakSNP11940    | <i>Kabuli</i>    | Ca_Kabuli_Chr07              | 4832993                        | (A/G)       |
| 11941       | CakSNP11941    | <i>Kabuli</i>    | Ca_Kabuli_Chr07              | 4834177                        | (G/T)       |
| 11942       | CakSNP11942    | <i>Kabuli</i>    | Ca_Kabuli_Chr07              | 4849553                        | (T/G)       |
| 11943       | CakSNP11943    | <i>Kabuli</i>    | Ca_Kabuli_Chr07              | 4849573                        | (T/C)       |
| 11944       | CakSNP11944    | <i>Kabuli</i>    | Ca_Kabuli_Chr07              | 4907315                        | (C/T)       |
| 11945       | CakSNP11945    | <i>Kabuli</i>    | Ca_Kabuli_Chr07              | 4926759                        | (A/T)       |
| 11946       | CakSNP11946    | <i>Kabuli</i>    | Ca_Kabuli_Chr07              | 4942847                        | (A/G)       |
| 11947       | CakSNP11947    | <i>Kabuli</i>    | Ca_Kabuli_Chr07              | 4942902                        | (G/C)       |
| 11948       | CakSNP11948    | <i>Kabuli</i>    | Ca_Kabuli_Chr07              | 4945935                        | (C/G)       |
| 11949       | CakSNP11949    | <i>Kabuli</i>    | Ca_Kabuli_Chr07              | 4981846                        | (T/C)       |
| 11950       | CakSNP11950    | <i>Kabuli</i>    | Ca_Kabuli_Chr07              | 5122536                        | (T/G)       |
| 11951       | CakSNP11951    | <i>Kabuli</i>    | Ca_Kabuli_Chr07              | 5251897                        | (G/C)       |
| 11952       | CakSNP11952    | <i>Kabuli</i>    | Ca_Kabuli_Chr07              | 5361558                        | (T/C)       |
| 11953       | CakSNP11953    | <i>Kabuli</i>    | Ca_Kabuli_Chr07              | 5383564                        | (G/C)       |
| 11954       | CakSNP11954    | <i>Kabuli</i>    | Ca_Kabuli_Chr07              | 5383566                        | (A/T)       |
| 11955       | CakSNP11955    | <i>Kabuli</i>    | Ca_Kabuli_Chr07              | 5383671                        | (G/T)       |
| 11956       | CakSNP11956    | <i>Kabuli</i>    | Ca_Kabuli_Chr07              | 5383695                        | (T/G)       |
| 11957       | CakSNP11957    | <i>Kabuli</i>    | Ca_Kabuli_Chr07              | 5383767                        | (G/A)       |
| 11958       | CakSNP11958    | <i>Kabuli</i>    | Ca_Kabuli_Chr07              | 5384447                        | (G/C)       |
| 11959       | CakSNP11959    | <i>Kabuli</i>    | Ca_Kabuli_Chr07              | 5384467                        | (C/T)       |
| 11960       | CakSNP11960    | <i>Kabuli</i>    | Ca_Kabuli_Chr07              | 5406524                        | (T/G)       |
| 11961       | CakSNP11961    | <i>Kabuli</i>    | Ca_Kabuli_Chr07              | 5416862                        | (C/G)       |
| 11962       | CakSNP11962    | <i>Kabuli</i>    | Ca_Kabuli_Chr07              | 5416865                        | (A/G)       |
| 11963       | CakSNP11963    | <i>Kabuli</i>    | Ca_Kabuli_Chr07              | 5416874                        | (C/T)       |
| 11964       | CakSNP11964    | <i>Kabuli</i>    | Ca_Kabuli_Chr07              | 5464941                        | (G/A)       |
| 11965       | CakSNP11965    | <i>Kabuli</i>    | Ca_Kabuli_Chr07              | 5464942                        | (A/G)       |
| 11966       | CakSNP11966    | <i>Kabuli</i>    | Ca_Kabuli_Chr07              | 5467744                        | (G/C)       |
| 11967       | CakSNP11967    | <i>Kabuli</i>    | Ca_Kabuli_Chr07              | 5500318                        | (C/A)       |
| 11968       | CakSNP11968    | <i>Kabuli</i>    | Ca_Kabuli_Chr07              | 5508162                        | (A/C)       |
| 11969       | CakSNP11969    | <i>Kabuli</i>    | Ca_Kabuli_Chr07              | 5520720                        | (T/G)       |

| <b>S.N.</b> | <b>SNP IDs</b> | <b>Cultivars</b> | <b>Chromosomes/scaffolds</b> | <b>Physical positions (bp)</b> | <b>SNPs</b> |
|-------------|----------------|------------------|------------------------------|--------------------------------|-------------|
| 11970       | CakSNP11970    | <i>Kabuli</i>    | Ca_Kabuli_Chr07              | 5520934                        | (T/C)       |
| 11971       | CakSNP11971    | <i>Kabuli</i>    | Ca_Kabuli_Chr07              | 5521596                        | (T/C)       |
| 11972       | CakSNP11972    | <i>Kabuli</i>    | Ca_Kabuli_Chr07              | 5521659                        | (G/T)       |
| 11973       | CakSNP11973    | <i>Kabuli</i>    | Ca_Kabuli_Chr07              | 5529577                        | (T/G)       |
| 11974       | CakSNP11974    | <i>Kabuli</i>    | Ca_Kabuli_Chr07              | 5529729                        | (A/G)       |
| 11975       | CakSNP11975    | <i>Kabuli</i>    | Ca_Kabuli_Chr07              | 5529888                        | (A/G)       |
| 11976       | CakSNP11976    | <i>Kabuli</i>    | Ca_Kabuli_Chr07              | 5529844                        | (C/A)       |
| 11977       | CakSNP11977    | <i>Kabuli</i>    | Ca_Kabuli_Chr07              | 5537851                        | (G/C)       |
| 11978       | CakSNP11978    | <i>Kabuli</i>    | Ca_Kabuli_Chr07              | 5537880                        | (G/T)       |
| 11979       | CakSNP11979    | <i>Kabuli</i>    | Ca_Kabuli_Chr07              | 5561607                        | (G/T)       |
| 11980       | CakSNP11980    | <i>Kabuli</i>    | Ca_Kabuli_Chr07              | 5568114                        | (C/A)       |
| 11981       | CakSNP11981    | <i>Kabuli</i>    | Ca_Kabuli_Chr07              | 5577467                        | (G/T)       |
| 11982       | CakSNP11982    | <i>Kabuli</i>    | Ca_Kabuli_Chr07              | 5577439                        | (A/G)       |
| 11983       | CakSNP11983    | <i>Kabuli</i>    | Ca_Kabuli_Chr07              | 5581968                        | (G/C)       |
| 11984       | CakSNP11984    | <i>Kabuli</i>    | Ca_Kabuli_Chr07              | 5602106                        | (T/C)       |
| 11985       | CakSNP11985    | <i>Kabuli</i>    | Ca_Kabuli_Chr07              | 5602144                        | (G/T)       |
| 11986       | CakSNP11986    | <i>Kabuli</i>    | Ca_Kabuli_Chr07              | 5605118                        | (G/A)       |
| 11987       | CakSNP11987    | <i>Kabuli</i>    | Ca_Kabuli_Chr07              | 5605106                        | (G/A)       |
| 11988       | CakSNP11988    | <i>Kabuli</i>    | Ca_Kabuli_Chr07              | 5658445                        | (G/T)       |
| 11989       | CakSNP11989    | <i>Kabuli</i>    | Ca_Kabuli_Chr07              | 5671902                        | (G/T)       |
| 11990       | CakSNP11990    | <i>Kabuli</i>    | Ca_Kabuli_Chr07              | 5672009                        | (G/C)       |
| 11991       | CakSNP11991    | <i>Kabuli</i>    | Ca_Kabuli_Chr07              | 5672156                        | (T/C)       |
| 11992       | CakSNP11992    | <i>Kabuli</i>    | Ca_Kabuli_Chr07              | 5683412                        | (T/A)       |
| 11993       | CakSNP11993    | <i>Kabuli</i>    | Ca_Kabuli_Chr07              | 5713977                        | (T/C)       |
| 11994       | CakSNP11994    | <i>Kabuli</i>    | Ca_Kabuli_Chr07              | 5735293                        | (T/A)       |
| 11995       | CakSNP11995    | <i>Kabuli</i>    | Ca_Kabuli_Chr07              | 5735448                        | (A/T)       |
| 11996       | CakSNP11996    | <i>Kabuli</i>    | Ca_Kabuli_Chr07              | 5737341                        | (C/T)       |
| 11997       | CakSNP11997    | <i>Kabuli</i>    | Ca_Kabuli_Chr07              | 5737305                        | (G/A)       |
| 11998       | CakSNP11998    | <i>Kabuli</i>    | Ca_Kabuli_Chr07              | 5756269                        | (C/T)       |
| 11999       | CakSNP11999    | <i>Kabuli</i>    | Ca_Kabuli_Chr07              | 5756832                        | (A/C)       |
| 12000       | CakSNP12000    | <i>Kabuli</i>    | Ca_Kabuli_Chr07              | 5774218                        | (T/A)       |
| 12001       | CakSNP12001    | <i>Kabuli</i>    | Ca_Kabuli_Chr07              | 5774219                        | (T/A)       |
| 12002       | CakSNP12002    | <i>Kabuli</i>    | Ca_Kabuli_Chr07              | 5774220                        | (A/T)       |
| 12003       | CakSNP12003    | <i>Kabuli</i>    | Ca_Kabuli_Chr07              | 5774221                        | (A/T)       |
| 12004       | CakSNP12004    | <i>Kabuli</i>    | Ca_Kabuli_Chr07              | 5774230                        | (G/A)       |
| 12005       | CakSNP12005    | <i>Kabuli</i>    | Ca_Kabuli_Chr07              | 5774257                        | (C/T)       |
| 12006       | CakSNP12006    | <i>Kabuli</i>    | Ca_Kabuli_Chr07              | 5774310                        | (A/G)       |
| 12007       | CakSNP12007    | <i>Kabuli</i>    | Ca_Kabuli_Chr07              | 5811097                        | (G/A)       |

| <b>S.N.</b> | <b>SNP IDs</b> | <b>Cultivars</b> | <b>Chromosomes/scaffolds</b> | <b>Physical positions (bp)</b> | <b>SNPs</b> |
|-------------|----------------|------------------|------------------------------|--------------------------------|-------------|
| 12008       | CakSNP12008    | <i>Kabuli</i>    | Ca_Kabuli_Chr07              | 5811060                        | (T/C)       |
| 12009       | CakSNP12009    | <i>Kabuli</i>    | Ca_Kabuli_Chr07              | 5811044                        | (T/A)       |
| 12010       | CakSNP12010    | <i>Kabuli</i>    | Ca_Kabuli_Chr07              | 5836421                        | (A/T)       |
| 12011       | CakSNP12011    | <i>Kabuli</i>    | Ca_Kabuli_Chr07              | 5846477                        | (A/G)       |
| 12012       | CakSNP12012    | <i>Kabuli</i>    | Ca_Kabuli_Chr07              | 5849936                        | (C/T)       |
| 12013       | CakSNP12013    | <i>Kabuli</i>    | Ca_Kabuli_Chr07              | 5849904                        | (C/A)       |
| 12014       | CakSNP12014    | <i>Kabuli</i>    | Ca_Kabuli_Chr07              | 5850058                        | (T/C)       |
| 12015       | CakSNP12015    | <i>Kabuli</i>    | Ca_Kabuli_Chr07              | 5854598                        | (C/T)       |
| 12016       | CakSNP12016    | <i>Kabuli</i>    | Ca_Kabuli_Chr07              | 5929009                        | (C/G)       |
| 12017       | CakSNP12017    | <i>Kabuli</i>    | Ca_Kabuli_Chr07              | 5946113                        | (G/A)       |
| 12018       | CakSNP12018    | <i>Kabuli</i>    | Ca_Kabuli_Chr07              | 5950352                        | (T/A)       |
| 12019       | CakSNP12019    | <i>Kabuli</i>    | Ca_Kabuli_Chr07              | 5950492                        | (T/C)       |
| 12020       | CakSNP12020    | <i>Kabuli</i>    | Ca_Kabuli_Chr07              | 5957696                        | (T/C)       |
| 12021       | CakSNP12021    | <i>Kabuli</i>    | Ca_Kabuli_Chr07              | 5963611                        | (C/G)       |
| 12022       | CakSNP12022    | <i>Kabuli</i>    | Ca_Kabuli_Chr07              | 5963609                        | (C/A)       |
| 12023       | CakSNP12023    | <i>Kabuli</i>    | Ca_Kabuli_Chr07              | 6012561                        | (A/C)       |
| 12024       | CakSNP12024    | <i>Kabuli</i>    | Ca_Kabuli_Chr07              | 6012611                        | (A/C)       |
| 12025       | CakSNP12025    | <i>Kabuli</i>    | Ca_Kabuli_Chr07              | 6029991                        | (G/A)       |
| 12026       | CakSNP12026    | <i>Kabuli</i>    | Ca_Kabuli_Chr07              | 6029990                        | (C/G)       |
| 12027       | CakSNP12027    | <i>Kabuli</i>    | Ca_Kabuli_Chr07              | 6066322                        | (G/A)       |
| 12028       | CakSNP12028    | <i>Kabuli</i>    | Ca_Kabuli_Chr07              | 6074408                        | (T/A)       |
| 12029       | CakSNP12029    | <i>Kabuli</i>    | Ca_Kabuli_Chr07              | 6075124                        | (T/G)       |
| 12030       | CakSNP12030    | <i>Kabuli</i>    | Ca_Kabuli_Chr07              | 6075218                        | (C/G)       |
| 12031       | CakSNP12031    | <i>Kabuli</i>    | Ca_Kabuli_Chr07              | 6096238                        | (C/A)       |
| 12032       | CakSNP12032    | <i>Kabuli</i>    | Ca_Kabuli_Chr07              | 6096237                        | (C/G)       |
| 12033       | CakSNP12033    | <i>Kabuli</i>    | Ca_Kabuli_Chr07              | 6110019                        | (T/C)       |
| 12034       | CakSNP12034    | <i>Kabuli</i>    | Ca_Kabuli_Chr07              | 6132021                        | (G/A)       |
| 12035       | CakSNP12035    | <i>Kabuli</i>    | Ca_Kabuli_Chr07              | 6232777                        | (T/C)       |
| 12036       | CakSNP12036    | <i>Kabuli</i>    | Ca_Kabuli_Chr07              | 6282979                        | (C/A)       |
| 12037       | CakSNP12037    | <i>Kabuli</i>    | Ca_Kabuli_Chr07              | 6282974                        | (T/A)       |
| 12038       | CakSNP12038    | <i>Kabuli</i>    | Ca_Kabuli_Chr07              | 6282949                        | (T/A)       |
| 12039       | CakSNP12039    | <i>Kabuli</i>    | Ca_Kabuli_Chr07              | 6299248                        | (A/G)       |
| 12040       | CakSNP12040    | <i>Kabuli</i>    | Ca_Kabuli_Chr07              | 6299249                        | (C/G)       |
| 12041       | CakSNP12041    | <i>Kabuli</i>    | Ca_Kabuli_Chr07              | 6330237                        | (A/T)       |
| 12042       | CakSNP12042    | <i>Kabuli</i>    | Ca_Kabuli_Chr07              | 6340051                        | (A/G)       |
| 12043       | CakSNP12043    | <i>Kabuli</i>    | Ca_Kabuli_Chr07              | 6340064                        | (C/G)       |
| 12044       | CakSNP12044    | <i>Kabuli</i>    | Ca_Kabuli_Chr07              | 6340111                        | (C/G)       |
| 12045       | CakSNP12045    | <i>Kabuli</i>    | Ca_Kabuli_Chr07              | 6340113                        | (G/A)       |

| <b>S.N.</b> | <b>SNP IDs</b> | <b>Cultivars</b> | <b>Chromosomes/scaffolds</b> | <b>Physical positions (bp)</b> | <b>SNPs</b> |
|-------------|----------------|------------------|------------------------------|--------------------------------|-------------|
| 12046       | CakSNP12046    | <i>Kabuli</i>    | Ca_Kabuli_Chr07              | 6340167                        | (T/A)       |
| 12047       | CakSNP12047    | <i>Kabuli</i>    | Ca_Kabuli_Chr07              | 6340216                        | (T/C)       |
| 12048       | CakSNP12048    | <i>Kabuli</i>    | Ca_Kabuli_Chr07              | 6372037                        | (A/G)       |
| 12049       | CakSNP12049    | <i>Kabuli</i>    | Ca_Kabuli_Chr07              | 6393366                        | (G/A)       |
| 12050       | CakSNP12050    | <i>Kabuli</i>    | Ca_Kabuli_Chr07              | 6430396                        | (T/A)       |
| 12051       | CakSNP12051    | <i>Kabuli</i>    | Ca_Kabuli_Chr07              | 6433480                        | (C/G)       |
| 12052       | CakSNP12052    | <i>Kabuli</i>    | Ca_Kabuli_Chr07              | 6467903                        | (C/T)       |
| 12053       | CakSNP12053    | <i>Kabuli</i>    | Ca_Kabuli_Chr07              | 6540624                        | (A/G)       |
| 12054       | CakSNP12054    | <i>Kabuli</i>    | Ca_Kabuli_Chr07              | 6540602                        | (G/A)       |
| 12055       | CakSNP12055    | <i>Kabuli</i>    | Ca_Kabuli_Chr07              | 6540601                        | (G/C)       |
| 12056       | CakSNP12056    | <i>Kabuli</i>    | Ca_Kabuli_Chr07              | 6566322                        | (T/C)       |
| 12057       | CakSNP12057    | <i>Kabuli</i>    | Ca_Kabuli_Chr07              | 6654718                        | (C/T)       |
| 12058       | CakSNP12058    | <i>Kabuli</i>    | Ca_Kabuli_Chr07              | 6681050                        | (C/T)       |
| 12059       | CakSNP12059    | <i>Kabuli</i>    | Ca_Kabuli_Chr07              | 6682456                        | (T/A)       |
| 12060       | CakSNP12060    | <i>Kabuli</i>    | Ca_Kabuli_Chr07              | 6682454                        | (A/G)       |
| 12061       | CakSNP12061    | <i>Kabuli</i>    | Ca_Kabuli_Chr07              | 6682453                        | (G/T)       |
| 12062       | CakSNP12062    | <i>Kabuli</i>    | Ca_Kabuli_Chr07              | 6682448                        | (T/C)       |
| 12063       | CakSNP12063    | <i>Kabuli</i>    | Ca_Kabuli_Chr07              | 6682443                        | (C/T)       |
| 12064       | CakSNP12064    | <i>Kabuli</i>    | Ca_Kabuli_Chr07              | 6682439                        | (T/A)       |
| 12065       | CakSNP12065    | <i>Kabuli</i>    | Ca_Kabuli_Chr07              | 6682455                        | (G/T)       |
| 12066       | CakSNP12066    | <i>Kabuli</i>    | Ca_Kabuli_Chr07              | 6703759                        | (C/T)       |
| 12067       | CakSNP12067    | <i>Kabuli</i>    | Ca_Kabuli_Chr07              | 6703849                        | (G/T)       |
| 12068       | CakSNP12068    | <i>Kabuli</i>    | Ca_Kabuli_Chr07              | 6767204                        | (G/T)       |
| 12069       | CakSNP12069    | <i>Kabuli</i>    | Ca_Kabuli_Chr07              | 6769694                        | (T/G)       |
| 12070       | CakSNP12070    | <i>Kabuli</i>    | Ca_Kabuli_Chr07              | 6792352                        | (T/C)       |
| 12071       | CakSNP12071    | <i>Kabuli</i>    | Ca_Kabuli_Chr07              | 6792606                        | (T/G)       |
| 12072       | CakSNP12072    | <i>Kabuli</i>    | Ca_Kabuli_Chr07              | 6807817                        | (A/C)       |
| 12073       | CakSNP12073    | <i>Kabuli</i>    | Ca_Kabuli_Chr07              | 6814954                        | (G/T)       |
| 12074       | CakSNP12074    | <i>Kabuli</i>    | Ca_Kabuli_Chr07              | 6815151                        | (G/T)       |
| 12075       | CakSNP12075    | <i>Kabuli</i>    | Ca_Kabuli_Chr07              | 6815113                        | (T/C)       |
| 12076       | CakSNP12076    | <i>Kabuli</i>    | Ca_Kabuli_Chr07              | 6859511                        | (C/G)       |
| 12077       | CakSNP12077    | <i>Kabuli</i>    | Ca_Kabuli_Chr07              | 6904686                        | (G/C)       |
| 12078       | CakSNP12078    | <i>Kabuli</i>    | Ca_Kabuli_Chr07              | 7026448                        | (C/T)       |
| 12079       | CakSNP12079    | <i>Kabuli</i>    | Ca_Kabuli_Chr07              | 7026516                        | (T/C)       |
| 12080       | CakSNP12080    | <i>Kabuli</i>    | Ca_Kabuli_Chr07              | 7026500                        | (T/A)       |
| 12081       | CakSNP12081    | <i>Kabuli</i>    | Ca_Kabuli_Chr07              | 7072853                        | (G/A)       |
| 12082       | CakSNP12082    | <i>Kabuli</i>    | Ca_Kabuli_Chr07              | 7126974                        | (T/C)       |
| 12083       | CakSNP12083    | <i>Kabuli</i>    | Ca_Kabuli_Chr07              | 7126979                        | (C/G)       |



| <b>S.N.</b> | <b>SNP IDs</b> | <b>Cultivars</b> | <b>Chromosomes/scaffolds</b> | <b>Physical positions (bp)</b> | <b>SNPs</b> |
|-------------|----------------|------------------|------------------------------|--------------------------------|-------------|
| 12084       | CakSNP12084    | <i>Kabuli</i>    | Ca_Kabuli_Chr07              | 7127030                        | (G/A)       |
| 12085       | CakSNP12085    | <i>Kabuli</i>    | Ca_Kabuli_Chr07              | 7146159                        | (C/G)       |
| 12086       | CakSNP12086    | <i>Kabuli</i>    | Ca_Kabuli_Chr07              | 7147557                        | (A/G)       |
| 12087       | CakSNP12087    | <i>Kabuli</i>    | Ca_Kabuli_Chr07              | 7234422                        | (T/G)       |
| 12088       | CakSNP12088    | <i>Kabuli</i>    | Ca_Kabuli_Chr07              | 7234507                        | (T/C)       |
| 12089       | CakSNP12089    | <i>Kabuli</i>    | Ca_Kabuli_Chr07              | 7234484                        | (G/A)       |
| 12090       | CakSNP12090    | <i>Kabuli</i>    | Ca_Kabuli_Chr07              | 7234430                        | (C/T)       |
| 12091       | CakSNP12091    | <i>Kabuli</i>    | Ca_Kabuli_Chr07              | 7261971                        | (C/T)       |
| 12092       | CakSNP12092    | <i>Kabuli</i>    | Ca_Kabuli_Chr07              | 7261941                        | (T/C)       |
| 12093       | CakSNP12093    | <i>Kabuli</i>    | Ca_Kabuli_Chr07              | 7265386                        | (T/A)       |
| 12094       | CakSNP12094    | <i>Kabuli</i>    | Ca_Kabuli_Chr07              | 7277353                        | (G/A)       |
| 12095       | CakSNP12095    | <i>Kabuli</i>    | Ca_Kabuli_Chr07              | 7304614                        | (T/G)       |
| 12096       | CakSNP12096    | <i>Kabuli</i>    | Ca_Kabuli_Chr07              | 7304617                        | (T/G)       |
| 12097       | CakSNP12097    | <i>Kabuli</i>    | Ca_Kabuli_Chr07              | 7423419                        | (G/A)       |
| 12098       | CakSNP12098    | <i>Kabuli</i>    | Ca_Kabuli_Chr07              | 7433827                        | (A/T)       |
| 12099       | CakSNP12099    | <i>Kabuli</i>    | Ca_Kabuli_Chr07              | 7449489                        | (T/C)       |
| 12100       | CakSNP12100    | <i>Kabuli</i>    | Ca_Kabuli_Chr07              | 7451931                        | (G/C)       |
| 12101       | CakSNP12101    | <i>Kabuli</i>    | Ca_Kabuli_Chr07              | 7491960                        | (G/A)       |
| 12102       | CakSNP12102    | <i>Kabuli</i>    | Ca_Kabuli_Chr07              | 7498598                        | (C/T)       |
| 12103       | CakSNP12103    | <i>Kabuli</i>    | Ca_Kabuli_Chr07              | 7544142                        | (A/G)       |
| 12104       | CakSNP12104    | <i>Kabuli</i>    | Ca_Kabuli_Chr07              | 7573889                        | (C/G)       |
| 12105       | CakSNP12105    | <i>Kabuli</i>    | Ca_Kabuli_Chr07              | 7576668                        | (A/C)       |
| 12106       | CakSNP12106    | <i>Kabuli</i>    | Ca_Kabuli_Chr07              | 7580158                        | (T/C)       |
| 12107       | CakSNP12107    | <i>Kabuli</i>    | Ca_Kabuli_Chr07              | 7580147                        | (C/A)       |
| 12108       | CakSNP12108    | <i>Kabuli</i>    | Ca_Kabuli_Chr07              | 7580118                        | (G/A)       |
| 12109       | CakSNP12109    | <i>Kabuli</i>    | Ca_Kabuli_Chr07              | 7612046                        | (A/T)       |
| 12110       | CakSNP12110    | <i>Kabuli</i>    | Ca_Kabuli_Chr07              | 7624697                        | (G/A)       |
| 12111       | CakSNP12111    | <i>Kabuli</i>    | Ca_Kabuli_Chr07              | 7625226                        | (G/T)       |
| 12112       | CakSNP12112    | <i>Kabuli</i>    | Ca_Kabuli_Chr07              | 7625277                        | (A/T)       |
| 12113       | CakSNP12113    | <i>Kabuli</i>    | Ca_Kabuli_Chr07              | 7625901                        | (A/C)       |
| 12114       | CakSNP12114    | <i>Kabuli</i>    | Ca_Kabuli_Chr07              | 7625943                        | (C/G)       |
| 12115       | CakSNP12115    | <i>Kabuli</i>    | Ca_Kabuli_Chr07              | 7663564                        | (A/G)       |
| 12116       | CakSNP12116    | <i>Kabuli</i>    | Ca_Kabuli_Chr07              | 7706816                        | (A/G)       |
| 12117       | CakSNP12117    | <i>Kabuli</i>    | Ca_Kabuli_Chr07              | 7756455                        | (C/T)       |
| 12118       | CakSNP12118    | <i>Kabuli</i>    | Ca_Kabuli_Chr07              | 7756482                        | (G/A)       |
| 12119       | CakSNP12119    | <i>Kabuli</i>    | Ca_Kabuli_Chr07              | 7756566                        | (G/A)       |
| 12120       | CakSNP12120    | <i>Kabuli</i>    | Ca_Kabuli_Chr07              | 7809179                        | (T/G)       |
| 12121       | CakSNP12121    | <i>Kabuli</i>    | Ca_Kabuli_Chr07              | 7809192                        | (A/C)       |

| <b>S.N.</b> | <b>SNP IDs</b> | <b>Cultivars</b> | <b>Chromosomes/scaffolds</b> | <b>Physical positions (bp)</b> | <b>SNPs</b> |
|-------------|----------------|------------------|------------------------------|--------------------------------|-------------|
| 12122       | CakSNP12122    | <i>Kabuli</i>    | Ca_Kabuli_Chr07              | 7875189                        | (C/A)       |
| 12123       | CakSNP12123    | <i>Kabuli</i>    | Ca_Kabuli_Chr07              | 7876554                        | (G/A)       |
| 12124       | CakSNP12124    | <i>Kabuli</i>    | Ca_Kabuli_Chr07              | 7876561                        | (C/T)       |
| 12125       | CakSNP12125    | <i>Kabuli</i>    | Ca_Kabuli_Chr07              | 7876570                        | (C/A)       |
| 12126       | CakSNP12126    | <i>Kabuli</i>    | Ca_Kabuli_Chr07              | 7928398                        | (C/T)       |
| 12127       | CakSNP12127    | <i>Kabuli</i>    | Ca_Kabuli_Chr07              | 7982650                        | (G/T)       |
| 12128       | CakSNP12128    | <i>Kabuli</i>    | Ca_Kabuli_Chr07              | 7982871                        | (T/C)       |
| 12129       | CakSNP12129    | <i>Kabuli</i>    | Ca_Kabuli_Chr07              | 7982890                        | (T/A)       |
| 12130       | CakSNP12130    | <i>Kabuli</i>    | Ca_Kabuli_Chr07              | 7983519                        | (C/T)       |
| 12131       | CakSNP12131    | <i>Kabuli</i>    | Ca_Kabuli_Chr07              | 8041465                        | (T/G)       |
| 12132       | CakSNP12132    | <i>Kabuli</i>    | Ca_Kabuli_Chr07              | 8054489                        | (G/A)       |
| 12133       | CakSNP12133    | <i>Kabuli</i>    | Ca_Kabuli_Chr07              | 8061808                        | (A/G)       |
| 12134       | CakSNP12134    | <i>Kabuli</i>    | Ca_Kabuli_Chr07              | 8111735                        | (T/C)       |
| 12135       | CakSNP12135    | <i>Kabuli</i>    | Ca_Kabuli_Chr07              | 8111754                        | (A/C)       |
| 12136       | CakSNP12136    | <i>Kabuli</i>    | Ca_Kabuli_Chr07              | 8111759                        | (G/T)       |
| 12137       | CakSNP12137    | <i>Kabuli</i>    | Ca_Kabuli_Chr07              | 8169857                        | (A/G)       |
| 12138       | CakSNP12138    | <i>Kabuli</i>    | Ca_Kabuli_Chr07              | 8169866                        | (A/G)       |
| 12139       | CakSNP12139    | <i>Kabuli</i>    | Ca_Kabuli_Chr07              | 8169960                        | (A/T)       |
| 12140       | CakSNP12140    | <i>Kabuli</i>    | Ca_Kabuli_Chr07              | 8169947                        | (T/C)       |
| 12141       | CakSNP12141    | <i>Kabuli</i>    | Ca_Kabuli_Chr07              | 8187181                        | (G/A)       |
| 12142       | CakSNP12142    | <i>Kabuli</i>    | Ca_Kabuli_Chr07              | 8188004                        | (C/G)       |
| 12143       | CakSNP12143    | <i>Kabuli</i>    | Ca_Kabuli_Chr07              | 8210963                        | (G/A)       |
| 12144       | CakSNP12144    | <i>Kabuli</i>    | Ca_Kabuli_Chr07              | 8261062                        | (C/A)       |
| 12145       | CakSNP12145    | <i>Kabuli</i>    | Ca_Kabuli_Chr07              | 8286115                        | (A/T)       |
| 12146       | CakSNP12146    | <i>Kabuli</i>    | Ca_Kabuli_Chr07              | 8515092                        | (C/T)       |
| 12147       | CakSNP12147    | <i>Kabuli</i>    | Ca_Kabuli_Chr07              | 8535189                        | (C/T)       |
| 12148       | CakSNP12148    | <i>Kabuli</i>    | Ca_Kabuli_Chr07              | 8553114                        | (C/T)       |
| 12149       | CakSNP12149    | <i>Kabuli</i>    | Ca_Kabuli_Chr07              | 8569632                        | (A/G)       |
| 12150       | CakSNP12150    | <i>Kabuli</i>    | Ca_Kabuli_Chr07              | 8583890                        | (T/C)       |
| 12151       | CakSNP12151    | <i>Kabuli</i>    | Ca_Kabuli_Chr07              | 8609831                        | (A/T)       |
| 12152       | CakSNP12152    | <i>Kabuli</i>    | Ca_Kabuli_Chr07              | 8626840                        | (A/C)       |
| 12153       | CakSNP12153    | <i>Kabuli</i>    | Ca_Kabuli_Chr07              | 8626875                        | (A/T)       |
| 12154       | CakSNP12154    | <i>Kabuli</i>    | Ca_Kabuli_Chr07              | 8626916                        | (T/C)       |
| 12155       | CakSNP12155    | <i>Kabuli</i>    | Ca_Kabuli_Chr07              | 8741098                        | (T/C)       |
| 12156       | CakSNP12156    | <i>Kabuli</i>    | Ca_Kabuli_Chr07              | 8777670                        | (A/G)       |
| 12157       | CakSNP12157    | <i>Kabuli</i>    | Ca_Kabuli_Chr07              | 8777673                        | (A/G)       |
| 12158       | CakSNP12158    | <i>Kabuli</i>    | Ca_Kabuli_Chr07              | 8777690                        | (G/A)       |
| 12159       | CakSNP12159    | <i>Kabuli</i>    | Ca_Kabuli_Chr07              | 8824586                        | (A/G)       |

| <b>S.N.</b> | <b>SNP IDs</b> | <b>Cultivars</b> | <b>Chromosomes/scaffolds</b> | <b>Physical positions (bp)</b> | <b>SNPs</b> |
|-------------|----------------|------------------|------------------------------|--------------------------------|-------------|
| 12160       | CakSNP12160    | <i>Kabuli</i>    | Ca_Kabuli_Chr07              | 8824591                        | (C/T)       |
| 12161       | CakSNP12161    | <i>Kabuli</i>    | Ca_Kabuli_Chr07              | 8830772                        | (A/C)       |
| 12162       | CakSNP12162    | <i>Kabuli</i>    | Ca_Kabuli_Chr07              | 8830985                        | (A/G)       |
| 12163       | CakSNP12163    | <i>Kabuli</i>    | Ca_Kabuli_Chr07              | 8831024                        | (C/T)       |
| 12164       | CakSNP12164    | <i>Kabuli</i>    | Ca_Kabuli_Chr07              | 8831096                        | (G/A)       |
| 12165       | CakSNP12165    | <i>Kabuli</i>    | Ca_Kabuli_Chr07              | 8835601                        | (G/A)       |
| 12166       | CakSNP12166    | <i>Kabuli</i>    | Ca_Kabuli_Chr07              | 8835602                        | (A/G)       |
| 12167       | CakSNP12167    | <i>Kabuli</i>    | Ca_Kabuli_Chr07              | 8835610                        | (G/A)       |
| 12168       | CakSNP12168    | <i>Kabuli</i>    | Ca_Kabuli_Chr07              | 8835659                        | (G/T)       |
| 12169       | CakSNP12169    | <i>Kabuli</i>    | Ca_Kabuli_Chr07              | 8835757                        | (T/C)       |
| 12170       | CakSNP12170    | <i>Kabuli</i>    | Ca_Kabuli_Chr07              | 8835718                        | (T/G)       |
| 12171       | CakSNP12171    | <i>Kabuli</i>    | Ca_Kabuli_Chr07              | 8835705                        | (T/A)       |
| 12172       | CakSNP12172    | <i>Kabuli</i>    | Ca_Kabuli_Chr07              | 8844902                        | (C/T)       |
| 12173       | CakSNP12173    | <i>Kabuli</i>    | Ca_Kabuli_Chr07              | 8894362                        | (A/T)       |
| 12174       | CakSNP12174    | <i>Kabuli</i>    | Ca_Kabuli_Chr07              | 8895087                        | (T/C)       |
| 12175       | CakSNP12175    | <i>Kabuli</i>    | Ca_Kabuli_Chr07              | 8913092                        | (C/G)       |
| 12176       | CakSNP12176    | <i>Kabuli</i>    | Ca_Kabuli_Chr07              | 8937391                        | (A/G)       |
| 12177       | CakSNP12177    | <i>Kabuli</i>    | Ca_Kabuli_Chr07              | 8970387                        | (A/G)       |
| 12178       | CakSNP12178    | <i>Kabuli</i>    | Ca_Kabuli_Chr07              | 9128044                        | (A/G)       |
| 12179       | CakSNP12179    | <i>Kabuli</i>    | Ca_Kabuli_Chr07              | 9128050                        | (C/A)       |
| 12180       | CakSNP12180    | <i>Kabuli</i>    | Ca_Kabuli_Chr07              | 9147367                        | (A/T)       |
| 12181       | CakSNP12181    | <i>Kabuli</i>    | Ca_Kabuli_Chr07              | 9147366                        | (T/G)       |
| 12182       | CakSNP12182    | <i>Kabuli</i>    | Ca_Kabuli_Chr07              | 9147502                        | (C/T)       |
| 12183       | CakSNP12183    | <i>Kabuli</i>    | Ca_Kabuli_Chr07              | 9151709                        | (T/G)       |
| 12184       | CakSNP12184    | <i>Kabuli</i>    | Ca_Kabuli_Chr07              | 9151755                        | (C/T)       |
| 12185       | CakSNP12185    | <i>Kabuli</i>    | Ca_Kabuli_Chr07              | 9153104                        | (C/A)       |
| 12186       | CakSNP12186    | <i>Kabuli</i>    | Ca_Kabuli_Chr07              | 9153062                        | (G/A)       |
| 12187       | CakSNP12187    | <i>Kabuli</i>    | Ca_Kabuli_Chr07              | 9214457                        | (T/A)       |
| 12188       | CakSNP12188    | <i>Kabuli</i>    | Ca_Kabuli_Chr07              | 9214422                        | (C/T)       |
| 12189       | CakSNP12189    | <i>Kabuli</i>    | Ca_Kabuli_Chr07              | 9301825                        | (G/C)       |
| 12190       | CakSNP12190    | <i>Kabuli</i>    | Ca_Kabuli_Chr07              | 9301881                        | (C/T)       |
| 12191       | CakSNP12191    | <i>Kabuli</i>    | Ca_Kabuli_Chr07              | 9327709                        | (C/T)       |
| 12192       | CakSNP12192    | <i>Kabuli</i>    | Ca_Kabuli_Chr07              | 9327687                        | (G/A)       |
| 12193       | CakSNP12193    | <i>Kabuli</i>    | Ca_Kabuli_Chr07              | 9348281                        | (T/C)       |
| 12194       | CakSNP12194    | <i>Kabuli</i>    | Ca_Kabuli_Chr07              | 9350506                        | (T/G)       |
| 12195       | CakSNP12195    | <i>Kabuli</i>    | Ca_Kabuli_Chr07              | 9350535                        | (A/C)       |
| 12196       | CakSNP12196    | <i>Kabuli</i>    | Ca_Kabuli_Chr07              | 9351783                        | (C/G)       |
| 12197       | CakSNP12197    | <i>Kabuli</i>    | Ca_Kabuli_Chr07              | 9351863                        | (G/A)       |

| <b>S.N.</b> | <b>SNP IDs</b> | <b>Cultivars</b> | <b>Chromosomes/scaffolds</b> | <b>Physical positions (bp)</b> | <b>SNPs</b> |
|-------------|----------------|------------------|------------------------------|--------------------------------|-------------|
| 12198       | CakSNP12198    | <i>Kabuli</i>    | Ca_Kabuli_Chr07              | 9422842                        | (T/C)       |
| 12199       | CakSNP12199    | <i>Kabuli</i>    | Ca_Kabuli_Chr07              | 9422859                        | (T/C)       |
| 12200       | CakSNP12200    | <i>Kabuli</i>    | Ca_Kabuli_Chr07              | 9422876                        | (T/C)       |
| 12201       | CakSNP12201    | <i>Kabuli</i>    | Ca_Kabuli_Chr07              | 9422946                        | (G/C)       |
| 12202       | CakSNP12202    | <i>Kabuli</i>    | Ca_Kabuli_Chr07              | 9442836                        | (A/C)       |
| 12203       | CakSNP12203    | <i>Kabuli</i>    | Ca_Kabuli_Chr07              | 9475275                        | (T/G)       |
| 12204       | CakSNP12204    | <i>Kabuli</i>    | Ca_Kabuli_Chr07              | 9475817                        | (C/A)       |
| 12205       | CakSNP12205    | <i>Kabuli</i>    | Ca_Kabuli_Chr07              | 9475922                        | (A/G)       |
| 12206       | CakSNP12206    | <i>Kabuli</i>    | Ca_Kabuli_Chr07              | 9475874                        | (C/T)       |
| 12207       | CakSNP12207    | <i>Kabuli</i>    | Ca_Kabuli_Chr07              | 9523902                        | (C/T)       |
| 12208       | CakSNP12208    | <i>Kabuli</i>    | Ca_Kabuli_Chr07              | 9528324                        | (A/G)       |
| 12209       | CakSNP12209    | <i>Kabuli</i>    | Ca_Kabuli_Chr07              | 9536012                        | (C/T)       |
| 12210       | CakSNP12210    | <i>Kabuli</i>    | Ca_Kabuli_Chr07              | 9550284                        | (G/C)       |
| 12211       | CakSNP12211    | <i>Kabuli</i>    | Ca_Kabuli_Chr07              | 9550230                        | (C/T)       |
| 12212       | CakSNP12212    | <i>Kabuli</i>    | Ca_Kabuli_Chr07              | 9555319                        | (C/G)       |
| 12213       | CakSNP12213    | <i>Kabuli</i>    | Ca_Kabuli_Chr07              | 9577441                        | (G/A)       |
| 12214       | CakSNP12214    | <i>Kabuli</i>    | Ca_Kabuli_Chr07              | 9577424                        | (G/C)       |
| 12215       | CakSNP12215    | <i>Kabuli</i>    | Ca_Kabuli_Chr07              | 9593677                        | (C/T)       |
| 12216       | CakSNP12216    | <i>Kabuli</i>    | Ca_Kabuli_Chr07              | 9612558                        | (A/C)       |
| 12217       | CakSNP12217    | <i>Kabuli</i>    | Ca_Kabuli_Chr07              | 9616335                        | (G/A)       |
| 12218       | CakSNP12218    | <i>Kabuli</i>    | Ca_Kabuli_Chr07              | 9616347                        | (C/G)       |
| 12219       | CakSNP12219    | <i>Kabuli</i>    | Ca_Kabuli_Chr07              | 9616357                        | (C/T)       |
| 12220       | CakSNP12220    | <i>Kabuli</i>    | Ca_Kabuli_Chr07              | 9616363                        | (A/C)       |
| 12221       | CakSNP12221    | <i>Kabuli</i>    | Ca_Kabuli_Chr07              | 9616367                        | (C/G)       |
| 12222       | CakSNP12222    | <i>Kabuli</i>    | Ca_Kabuli_Chr07              | 9616378                        | (G/A)       |
| 12223       | CakSNP12223    | <i>Kabuli</i>    | Ca_Kabuli_Chr07              | 9637456                        | (C/T)       |
| 12224       | CakSNP12224    | <i>Kabuli</i>    | Ca_Kabuli_Chr07              | 9639993                        | (C/A)       |
| 12225       | CakSNP12225    | <i>Kabuli</i>    | Ca_Kabuli_Chr07              | 9661050                        | (A/C)       |
| 12226       | CakSNP12226    | <i>Kabuli</i>    | Ca_Kabuli_Chr07              | 9671210                        | (T/C)       |
| 12227       | CakSNP12227    | <i>Kabuli</i>    | Ca_Kabuli_Chr07              | 9696620                        | (A/G)       |
| 12228       | CakSNP12228    | <i>Kabuli</i>    | Ca_Kabuli_Chr07              | 9738801                        | (T/C)       |
| 12229       | CakSNP12229    | <i>Kabuli</i>    | Ca_Kabuli_Chr07              | 9744436                        | (G/T)       |
| 12230       | CakSNP12230    | <i>Kabuli</i>    | Ca_Kabuli_Chr07              | 9890779                        | (A/C)       |
| 12231       | CakSNP12231    | <i>Kabuli</i>    | Ca_Kabuli_Chr07              | 9890777                        | (A/G)       |
| 12232       | CakSNP12232    | <i>Kabuli</i>    | Ca_Kabuli_Chr07              | 9893688                        | (A/G)       |
| 12233       | CakSNP12233    | <i>Kabuli</i>    | Ca_Kabuli_Chr07              | 9897698                        | (T/G)       |
| 12234       | CakSNP12234    | <i>Kabuli</i>    | Ca_Kabuli_Chr07              | 9898718                        | (A/T)       |
| 12235       | CakSNP12235    | <i>Kabuli</i>    | Ca_Kabuli_Chr07              | 9899348                        | (C/T)       |

| <b>S.N.</b> | <b>SNP IDs</b> | <b>Cultivars</b> | <b>Chromosomes/scaffolds</b> | <b>Physical positions (bp)</b> | <b>SNPs</b> |
|-------------|----------------|------------------|------------------------------|--------------------------------|-------------|
| 12236       | CakSNP12236    | <i>Kabuli</i>    | Ca_Kabuli_Chr07              | 9914751                        | (G/A)       |
| 12237       | CakSNP12237    | <i>Kabuli</i>    | Ca_Kabuli_Chr07              | 9914764                        | (G/A)       |
| 12238       | CakSNP12238    | <i>Kabuli</i>    | Ca_Kabuli_Chr07              | 9914770                        | (T/C)       |
| 12239       | CakSNP12239    | <i>Kabuli</i>    | Ca_Kabuli_Chr07              | 9914785                        | (T/C)       |
| 12240       | CakSNP12240    | <i>Kabuli</i>    | Ca_Kabuli_Chr07              | 9914794                        | (G/A)       |
| 12241       | CakSNP12241    | <i>Kabuli</i>    | Ca_Kabuli_Chr07              | 9914737                        | (C/G)       |
| 12242       | CakSNP12242    | <i>Kabuli</i>    | Ca_Kabuli_Chr07              | 9914745                        | (T/C)       |
| 12243       | CakSNP12243    | <i>Kabuli</i>    | Ca_Kabuli_Chr07              | 9914856                        | (G/A)       |
| 12244       | CakSNP12244    | <i>Kabuli</i>    | Ca_Kabuli_Chr07              | 9914845                        | (A/C)       |
| 12245       | CakSNP12245    | <i>Kabuli</i>    | Ca_Kabuli_Chr07              | 9914832                        | (C/T)       |
| 12246       | CakSNP12246    | <i>Kabuli</i>    | Ca_Kabuli_Chr07              | 9914802                        | (T/G)       |
| 12247       | CakSNP12247    | <i>Kabuli</i>    | Ca_Kabuli_Chr07              | 9932369                        | (A/G)       |
| 12248       | CakSNP12248    | <i>Kabuli</i>    | Ca_Kabuli_Chr07              | 9936661                        | (C/T)       |
| 12249       | CakSNP12249    | <i>Kabuli</i>    | Ca_Kabuli_Chr07              | 9936854                        | (A/G)       |
| 12250       | CakSNP12250    | <i>Kabuli</i>    | Ca_Kabuli_Chr07              | 9938937                        | (T/C)       |
| 12251       | CakSNP12251    | <i>Kabuli</i>    | Ca_Kabuli_Chr07              | 10050020                       | (A/C)       |
| 12252       | CakSNP12252    | <i>Kabuli</i>    | Ca_Kabuli_Chr07              | 10049998                       | (T/A)       |
| 12253       | CakSNP12253    | <i>Kabuli</i>    | Ca_Kabuli_Chr07              | 10049996                       | (A/G)       |
| 12254       | CakSNP12254    | <i>Kabuli</i>    | Ca_Kabuli_Chr07              | 10089428                       | (T/C)       |
| 12255       | CakSNP12255    | <i>Kabuli</i>    | Ca_Kabuli_Chr07              | 10089539                       | (T/A)       |
| 12256       | CakSNP12256    | <i>Kabuli</i>    | Ca_Kabuli_Chr07              | 10106084                       | (C/G)       |
| 12257       | CakSNP12257    | <i>Kabuli</i>    | Ca_Kabuli_Chr07              | 10106065                       | (A/G)       |
| 12258       | CakSNP12258    | <i>Kabuli</i>    | Ca_Kabuli_Chr07              | 10106054                       | (G/C)       |
| 12259       | CakSNP12259    | <i>Kabuli</i>    | Ca_Kabuli_Chr07              | 10137842                       | (A/G)       |
| 12260       | CakSNP12260    | <i>Kabuli</i>    | Ca_Kabuli_Chr07              | 10137890                       | (A/G)       |
| 12261       | CakSNP12261    | <i>Kabuli</i>    | Ca_Kabuli_Chr07              | 10181630                       | (G/T)       |
| 12262       | CakSNP12262    | <i>Kabuli</i>    | Ca_Kabuli_Chr07              | 10208029                       | (T/C)       |
| 12263       | CakSNP12263    | <i>Kabuli</i>    | Ca_Kabuli_Chr07              | 10216813                       | (G/A)       |
| 12264       | CakSNP12264    | <i>Kabuli</i>    | Ca_Kabuli_Chr07              | 10223046                       | (C/T)       |
| 12265       | CakSNP12265    | <i>Kabuli</i>    | Ca_Kabuli_Chr07              | 10223068                       | (G/T)       |
| 12266       | CakSNP12266    | <i>Kabuli</i>    | Ca_Kabuli_Chr07              | 10223069                       | (G/T)       |
| 12267       | CakSNP12267    | <i>Kabuli</i>    | Ca_Kabuli_Chr07              | 10223071                       | (T/A)       |
| 12268       | CakSNP12268    | <i>Kabuli</i>    | Ca_Kabuli_Chr07              | 10223074                       | (G/T)       |
| 12269       | CakSNP12269    | <i>Kabuli</i>    | Ca_Kabuli_Chr07              | 10223075                       | (C/T)       |
| 12270       | CakSNP12270    | <i>Kabuli</i>    | Ca_Kabuli_Chr07              | 10322726                       | (T/C)       |
| 12271       | CakSNP12271    | <i>Kabuli</i>    | Ca_Kabuli_Chr07              | 10340199                       | (T/C)       |
| 12272       | CakSNP12272    | <i>Kabuli</i>    | Ca_Kabuli_Chr07              | 10435983                       | (C/A)       |
| 12273       | CakSNP12273    | <i>Kabuli</i>    | Ca_Kabuli_Chr07              | 10465140                       | (G/A)       |

| <b>S.N.</b> | <b>SNP IDs</b> | <b>Cultivars</b> | <b>Chromosomes/scaffolds</b> | <b>Physical positions (bp)</b> | <b>SNPs</b> |
|-------------|----------------|------------------|------------------------------|--------------------------------|-------------|
| 12274       | CakSNP12274    | <i>Kabuli</i>    | Ca_Kabuli_Chr07              | 10480401                       | (A/C)       |
| 12275       | CakSNP12275    | <i>Kabuli</i>    | Ca_Kabuli_Chr07              | 10480462                       | (A/G)       |
| 12276       | CakSNP12276    | <i>Kabuli</i>    | Ca_Kabuli_Chr07              | 10484200                       | (G/A)       |
| 12277       | CakSNP12277    | <i>Kabuli</i>    | Ca_Kabuli_Chr07              | 10484225                       | (C/A)       |
| 12278       | CakSNP12278    | <i>Kabuli</i>    | Ca_Kabuli_Chr07              | 10484196                       | (C/T)       |
| 12279       | CakSNP12279    | <i>Kabuli</i>    | Ca_Kabuli_Chr07              | 10485414                       | (C/T)       |
| 12280       | CakSNP12280    | <i>Kabuli</i>    | Ca_Kabuli_Chr07              | 10521423                       | (G/T)       |
| 12281       | CakSNP12281    | <i>Kabuli</i>    | Ca_Kabuli_Chr07              | 10521449                       | (C/A)       |
| 12282       | CakSNP12282    | <i>Kabuli</i>    | Ca_Kabuli_Chr07              | 10614159                       | (G/A)       |
| 12283       | CakSNP12283    | <i>Kabuli</i>    | Ca_Kabuli_Chr07              | 10658367                       | (A/T)       |
| 12284       | CakSNP12284    | <i>Kabuli</i>    | Ca_Kabuli_Chr07              | 10658446                       | (G/T)       |
| 12285       | CakSNP12285    | <i>Kabuli</i>    | Ca_Kabuli_Chr07              | 10688189                       | (T/G)       |
| 12286       | CakSNP12286    | <i>Kabuli</i>    | Ca_Kabuli_Chr07              | 10688401                       | (A/G)       |
| 12287       | CakSNP12287    | <i>Kabuli</i>    | Ca_Kabuli_Chr07              | 10688464                       | (G/A)       |
| 12288       | CakSNP12288    | <i>Kabuli</i>    | Ca_Kabuli_Chr07              | 10688434                       | (T/C)       |
| 12289       | CakSNP12289    | <i>Kabuli</i>    | Ca_Kabuli_Chr07              | 10688499                       | (T/C)       |
| 12290       | CakSNP12290    | <i>Kabuli</i>    | Ca_Kabuli_Chr07              | 10703569                       | (A/T)       |
| 12291       | CakSNP12291    | <i>Kabuli</i>    | Ca_Kabuli_Chr07              | 10703612                       | (A/C)       |
| 12292       | CakSNP12292    | <i>Kabuli</i>    | Ca_Kabuli_Chr07              | 10703704                       | (G/A)       |
| 12293       | CakSNP12293    | <i>Kabuli</i>    | Ca_Kabuli_Chr07              | 10703679                       | (T/C)       |
| 12294       | CakSNP12294    | <i>Kabuli</i>    | Ca_Kabuli_Chr07              | 10712202                       | (T/C)       |
| 12295       | CakSNP12295    | <i>Kabuli</i>    | Ca_Kabuli_Chr07              | 10712231                       | (G/A)       |
| 12296       | CakSNP12296    | <i>Kabuli</i>    | Ca_Kabuli_Chr07              | 10758973                       | (A/T)       |
| 12297       | CakSNP12297    | <i>Kabuli</i>    | Ca_Kabuli_Chr07              | 10759142                       | (T/G)       |
| 12298       | CakSNP12298    | <i>Kabuli</i>    | Ca_Kabuli_Chr07              | 10775881                       | (C/T)       |
| 12299       | CakSNP12299    | <i>Kabuli</i>    | Ca_Kabuli_Chr07              | 10775875                       | (A/G)       |
| 12300       | CakSNP12300    | <i>Kabuli</i>    | Ca_Kabuli_Chr07              | 10775851                       | (C/T)       |
| 12301       | CakSNP12301    | <i>Kabuli</i>    | Ca_Kabuli_Chr07              | 10775860                       | (A/G)       |
| 12302       | CakSNP12302    | <i>Kabuli</i>    | Ca_Kabuli_Chr07              | 10780680                       | (C/G)       |
| 12303       | CakSNP12303    | <i>Kabuli</i>    | Ca_Kabuli_Chr07              | 10780682                       | (G/A)       |
| 12304       | CakSNP12304    | <i>Kabuli</i>    | Ca_Kabuli_Chr07              | 10780686                       | (T/C)       |
| 12305       | CakSNP12305    | <i>Kabuli</i>    | Ca_Kabuli_Chr07              | 10797204                       | (T/C)       |
| 12306       | CakSNP12306    | <i>Kabuli</i>    | Ca_Kabuli_Chr07              | 10812617                       | (G/T)       |
| 12307       | CakSNP12307    | <i>Kabuli</i>    | Ca_Kabuli_Chr07              | 10816523                       | (T/G)       |
| 12308       | CakSNP12308    | <i>Kabuli</i>    | Ca_Kabuli_Chr07              | 10816674                       | (C/T)       |
| 12309       | CakSNP12309    | <i>Kabuli</i>    | Ca_Kabuli_Chr07              | 10816662                       | (T/A)       |
| 12310       | CakSNP12310    | <i>Kabuli</i>    | Ca_Kabuli_Chr07              | 10859907                       | (G/A)       |
| 12311       | CakSNP12311    | <i>Kabuli</i>    | Ca_Kabuli_Chr07              | 10859842                       | (G/T)       |

| <b>S.N.</b> | <b>SNP IDs</b> | <b>Cultivars</b> | <b>Chromosomes/scaffolds</b> | <b>Physical positions (bp)</b> | <b>SNPs</b> |
|-------------|----------------|------------------|------------------------------|--------------------------------|-------------|
| 12312       | CakSNP12312    | <i>Kabuli</i>    | Ca_Kabuli_Chr07              | 10900910                       | (T/C)       |
| 12313       | CakSNP12313    | <i>Kabuli</i>    | Ca_Kabuli_Chr07              | 11086047                       | (G/A)       |
| 12314       | CakSNP12314    | <i>Kabuli</i>    | Ca_Kabuli_Chr07              | 11086071                       | (A/T)       |
| 12315       | CakSNP12315    | <i>Kabuli</i>    | Ca_Kabuli_Chr07              | 11105847                       | (C/G)       |
| 12316       | CakSNP12316    | <i>Kabuli</i>    | Ca_Kabuli_Chr07              | 11105961                       | (A/C)       |
| 12317       | CakSNP12317    | <i>Kabuli</i>    | Ca_Kabuli_Chr07              | 11192667                       | (G/A)       |
| 12318       | CakSNP12318    | <i>Kabuli</i>    | Ca_Kabuli_Chr07              | 11192712                       | (C/T)       |
| 12319       | CakSNP12319    | <i>Kabuli</i>    | Ca_Kabuli_Chr07              | 11192703                       | (A/C)       |
| 12320       | CakSNP12320    | <i>Kabuli</i>    | Ca_Kabuli_Chr07              | 11261924                       | (G/A)       |
| 12321       | CakSNP12321    | <i>Kabuli</i>    | Ca_Kabuli_Chr07              | 11339511                       | (C/T)       |
| 12322       | CakSNP12322    | <i>Kabuli</i>    | Ca_Kabuli_Chr07              | 11393795                       | (A/G)       |
| 12323       | CakSNP12323    | <i>Kabuli</i>    | Ca_Kabuli_Chr07              | 11393986                       | (A/G)       |
| 12324       | CakSNP12324    | <i>Kabuli</i>    | Ca_Kabuli_Chr07              | 11473766                       | (A/G)       |
| 12325       | CakSNP12325    | <i>Kabuli</i>    | Ca_Kabuli_Chr07              | 11521694                       | (G/A)       |
| 12326       | CakSNP12326    | <i>Kabuli</i>    | Ca_Kabuli_Chr07              | 11527428                       | (G/A)       |
| 12327       | CakSNP12327    | <i>Kabuli</i>    | Ca_Kabuli_Chr07              | 11545846                       | (A/G)       |
| 12328       | CakSNP12328    | <i>Kabuli</i>    | Ca_Kabuli_Chr07              | 11568963                       | (T/A)       |
| 12329       | CakSNP12329    | <i>Kabuli</i>    | Ca_Kabuli_Chr07              | 11568945                       | (G/T)       |
| 12330       | CakSNP12330    | <i>Kabuli</i>    | Ca_Kabuli_Chr07              | 11590987                       | (A/C)       |
| 12331       | CakSNP12331    | <i>Kabuli</i>    | Ca_Kabuli_Chr07              | 11630509                       | (A/G)       |
| 12332       | CakSNP12332    | <i>Kabuli</i>    | Ca_Kabuli_Chr07              | 11630511                       | (C/T)       |
| 12333       | CakSNP12333    | <i>Kabuli</i>    | Ca_Kabuli_Chr07              | 11638885                       | (C/A)       |
| 12334       | CakSNP12334    | <i>Kabuli</i>    | Ca_Kabuli_Chr07              | 11639117                       | (C/G)       |
| 12335       | CakSNP12335    | <i>Kabuli</i>    | Ca_Kabuli_Chr07              | 11685818                       | (G/T)       |
| 12336       | CakSNP12336    | <i>Kabuli</i>    | Ca_Kabuli_Chr07              | 11685899                       | (A/G)       |
| 12337       | CakSNP12337    | <i>Kabuli</i>    | Ca_Kabuli_Chr07              | 11686238                       | (C/T)       |
| 12338       | CakSNP12338    | <i>Kabuli</i>    | Ca_Kabuli_Chr07              | 11725655                       | (G/A)       |
| 12339       | CakSNP12339    | <i>Kabuli</i>    | Ca_Kabuli_Chr07              | 11730926                       | (T/C)       |
| 12340       | CakSNP12340    | <i>Kabuli</i>    | Ca_Kabuli_Chr07              | 11730946                       | (A/C)       |
| 12341       | CakSNP12341    | <i>Kabuli</i>    | Ca_Kabuli_Chr07              | 11735177                       | (T/C)       |
| 12342       | CakSNP12342    | <i>Kabuli</i>    | Ca_Kabuli_Chr07              | 11735381                       | (T/C)       |
| 12343       | CakSNP12343    | <i>Kabuli</i>    | Ca_Kabuli_Chr07              | 11735368                       | (G/C)       |
| 12344       | CakSNP12344    | <i>Kabuli</i>    | Ca_Kabuli_Chr07              | 11736006                       | (C/A)       |
| 12345       | CakSNP12345    | <i>Kabuli</i>    | Ca_Kabuli_Chr07              | 11792042                       | (G/A)       |
| 12346       | CakSNP12346    | <i>Kabuli</i>    | Ca_Kabuli_Chr07              | 11792126                       | (T/A)       |
| 12347       | CakSNP12347    | <i>Kabuli</i>    | Ca_Kabuli_Chr07              | 11792136                       | (G/A)       |
| 12348       | CakSNP12348    | <i>Kabuli</i>    | Ca_Kabuli_Chr07              | 11803091                       | (T/G)       |
| 12349       | CakSNP12349    | <i>Kabuli</i>    | Ca_Kabuli_Chr07              | 11812410                       | (G/A)       |

| <b>S.N.</b> | <b>SNP IDs</b> | <b>Cultivars</b> | <b>Chromosomes/scaffolds</b> | <b>Physical positions (bp)</b> | <b>SNPs</b> |
|-------------|----------------|------------------|------------------------------|--------------------------------|-------------|
| 12350       | CakSNP12350    | <i>Kabuli</i>    | Ca_Kabuli_Chr07              | 11812441                       | (A/C)       |
| 12351       | CakSNP12351    | <i>Kabuli</i>    | Ca_Kabuli_Chr07              | 11858425                       | (C/T)       |
| 12352       | CakSNP12352    | <i>Kabuli</i>    | Ca_Kabuli_Chr07              | 11886954                       | (A/G)       |
| 12353       | CakSNP12353    | <i>Kabuli</i>    | Ca_Kabuli_Chr07              | 11902897                       | (A/G)       |
| 12354       | CakSNP12354    | <i>Kabuli</i>    | Ca_Kabuli_Chr07              | 11902985                       | (G/T)       |
| 12355       | CakSNP12355    | <i>Kabuli</i>    | Ca_Kabuli_Chr07              | 12010432                       | (G/A)       |
| 12356       | CakSNP12356    | <i>Kabuli</i>    | Ca_Kabuli_Chr07              | 12010471                       | (C/T)       |
| 12357       | CakSNP12357    | <i>Kabuli</i>    | Ca_Kabuli_Chr07              | 12010504                       | (G/A)       |
| 12358       | CakSNP12358    | <i>Kabuli</i>    | Ca_Kabuli_Chr07              | 12010499                       | (C/T)       |
| 12359       | CakSNP12359    | <i>Kabuli</i>    | Ca_Kabuli_Chr07              | 12010496                       | (G/A)       |
| 12360       | CakSNP12360    | <i>Kabuli</i>    | Ca_Kabuli_Chr07              | 12010494                       | (G/A)       |
| 12361       | CakSNP12361    | <i>Kabuli</i>    | Ca_Kabuli_Chr07              | 12010491                       | (G/T)       |
| 12362       | CakSNP12362    | <i>Kabuli</i>    | Ca_Kabuli_Chr07              | 12010483                       | (C/T)       |
| 12363       | CakSNP12363    | <i>Kabuli</i>    | Ca_Kabuli_Chr07              | 12010457                       | (C/T)       |
| 12364       | CakSNP12364    | <i>Kabuli</i>    | Ca_Kabuli_Chr07              | 12010544                       | (G/A)       |
| 12365       | CakSNP12365    | <i>Kabuli</i>    | Ca_Kabuli_Chr07              | 12010489                       | (C/T)       |
| 12366       | CakSNP12366    | <i>Kabuli</i>    | Ca_Kabuli_Chr07              | 12030080                       | (A/C)       |
| 12367       | CakSNP12367    | <i>Kabuli</i>    | Ca_Kabuli_Chr07              | 12071764                       | (T/C)       |
| 12368       | CakSNP12368    | <i>Kabuli</i>    | Ca_Kabuli_Chr07              | 12071773                       | (A/T)       |
| 12369       | CakSNP12369    | <i>Kabuli</i>    | Ca_Kabuli_Chr07              | 12203726                       | (T/G)       |
| 12370       | CakSNP12370    | <i>Kabuli</i>    | Ca_Kabuli_Chr07              | 12203722                       | (T/C)       |
| 12371       | CakSNP12371    | <i>Kabuli</i>    | Ca_Kabuli_Chr07              | 12203706                       | (T/C)       |
| 12372       | CakSNP12372    | <i>Kabuli</i>    | Ca_Kabuli_Chr07              | 12203690                       | (C/T)       |
| 12373       | CakSNP12373    | <i>Kabuli</i>    | Ca_Kabuli_Chr07              | 12244234                       | (C/T)       |
| 12374       | CakSNP12374    | <i>Kabuli</i>    | Ca_Kabuli_Chr07              | 12244259                       | (G/A)       |
| 12375       | CakSNP12375    | <i>Kabuli</i>    | Ca_Kabuli_Chr07              | 12284289                       | (T/A)       |
| 12376       | CakSNP12376    | <i>Kabuli</i>    | Ca_Kabuli_Chr07              | 12284304                       | (A/G)       |
| 12377       | CakSNP12377    | <i>Kabuli</i>    | Ca_Kabuli_Chr07              | 12385785                       | (C/T)       |
| 12378       | CakSNP12378    | <i>Kabuli</i>    | Ca_Kabuli_Chr07              | 12390774                       | (G/A)       |
| 12379       | CakSNP12379    | <i>Kabuli</i>    | Ca_Kabuli_Chr07              | 12481556                       | (G/C)       |
| 12380       | CakSNP12380    | <i>Kabuli</i>    | Ca_Kabuli_Chr07              | 12481627                       | (A/C)       |
| 12381       | CakSNP12381    | <i>Kabuli</i>    | Ca_Kabuli_Chr07              | 12481715                       | (A/G)       |
| 12382       | CakSNP12382    | <i>Kabuli</i>    | Ca_Kabuli_Chr07              | 12481835                       | (C/T)       |
| 12383       | CakSNP12383    | <i>Kabuli</i>    | Ca_Kabuli_Chr07              | 12482851                       | (G/A)       |
| 12384       | CakSNP12384    | <i>Kabuli</i>    | Ca_Kabuli_Chr07              | 12482822                       | (A/G)       |
| 12385       | CakSNP12385    | <i>Kabuli</i>    | Ca_Kabuli_Chr07              | 12482953                       | (A/C)       |
| 12386       | CakSNP12386    | <i>Kabuli</i>    | Ca_Kabuli_Chr07              | 12483290                       | (A/C)       |
| 12387       | CakSNP12387    | <i>Kabuli</i>    | Ca_Kabuli_Chr07              | 12492075                       | (G/A)       |



| <b>S.N.</b> | <b>SNP IDs</b> | <b>Cultivars</b> | <b>Chromosomes/scaffolds</b> | <b>Physical positions (bp)</b> | <b>SNPs</b> |
|-------------|----------------|------------------|------------------------------|--------------------------------|-------------|
| 12388       | CakSNP12388    | <i>Kabuli</i>    | Ca_Kabuli_Chr07              | 12492052                       | (C/T)       |
| 12389       | CakSNP12389    | <i>Kabuli</i>    | Ca_Kabuli_Chr07              | 12492046                       | (A/T)       |
| 12390       | CakSNP12390    | <i>Kabuli</i>    | Ca_Kabuli_Chr07              | 12616871                       | (T/C)       |
| 12391       | CakSNP12391    | <i>Kabuli</i>    | Ca_Kabuli_Chr07              | 12616870                       | (G/A)       |
| 12392       | CakSNP12392    | <i>Kabuli</i>    | Ca_Kabuli_Chr07              | 12616957                       | (C/T)       |
| 12393       | CakSNP12393    | <i>Kabuli</i>    | Ca_Kabuli_Chr07              | 12616937                       | (C/T)       |
| 12394       | CakSNP12394    | <i>Kabuli</i>    | Ca_Kabuli_Chr07              | 12623129                       | (T/C)       |
| 12395       | CakSNP12395    | <i>Kabuli</i>    | Ca_Kabuli_Chr07              | 12623128                       | (G/A)       |
| 12396       | CakSNP12396    | <i>Kabuli</i>    | Ca_Kabuli_Chr07              | 12623215                       | (C/T)       |
| 12397       | CakSNP12397    | <i>Kabuli</i>    | Ca_Kabuli_Chr07              | 12623195                       | (C/T)       |
| 12398       | CakSNP12398    | <i>Kabuli</i>    | Ca_Kabuli_Chr07              | 12628148                       | (A/G)       |
| 12399       | CakSNP12399    | <i>Kabuli</i>    | Ca_Kabuli_Chr07              | 12628211                       | (A/G)       |
| 12400       | CakSNP12400    | <i>Kabuli</i>    | Ca_Kabuli_Chr07              | 12628265                       | (T/A)       |
| 12401       | CakSNP12401    | <i>Kabuli</i>    | Ca_Kabuli_Chr07              | 12629986                       | (A/G)       |
| 12402       | CakSNP12402    | <i>Kabuli</i>    | Ca_Kabuli_Chr07              | 12633590                       | (A/C)       |
| 12403       | CakSNP12403    | <i>Kabuli</i>    | Ca_Kabuli_Chr07              | 12633642                       | (T/G)       |
| 12404       | CakSNP12404    | <i>Kabuli</i>    | Ca_Kabuli_Chr07              | 12633643                       | (A/T)       |
| 12405       | CakSNP12405    | <i>Kabuli</i>    | Ca_Kabuli_Chr07              | 12681440                       | (T/C)       |
| 12406       | CakSNP12406    | <i>Kabuli</i>    | Ca_Kabuli_Chr07              | 12718820                       | (C/G)       |
| 12407       | CakSNP12407    | <i>Kabuli</i>    | Ca_Kabuli_Chr07              | 12718853                       | (G/A)       |
| 12408       | CakSNP12408    | <i>Kabuli</i>    | Ca_Kabuli_Chr07              | 12730600                       | (C/A)       |
| 12409       | CakSNP12409    | <i>Kabuli</i>    | Ca_Kabuli_Chr07              | 12737516                       | (T/C)       |
| 12410       | CakSNP12410    | <i>Kabuli</i>    | Ca_Kabuli_Chr07              | 12893655                       | (C/T)       |
| 12411       | CakSNP12411    | <i>Kabuli</i>    | Ca_Kabuli_Chr07              | 12895182                       | (A/G)       |
| 12412       | CakSNP12412    | <i>Kabuli</i>    | Ca_Kabuli_Chr07              | 12898640                       | (A/C)       |
| 12413       | CakSNP12413    | <i>Kabuli</i>    | Ca_Kabuli_Chr07              | 12898709                       | (T/A)       |
| 12414       | CakSNP12414    | <i>Kabuli</i>    | Ca_Kabuli_Chr07              | 12898707                       | (G/A)       |
| 12415       | CakSNP12415    | <i>Kabuli</i>    | Ca_Kabuli_Chr07              | 12899398                       | (T/C)       |
| 12416       | CakSNP12416    | <i>Kabuli</i>    | Ca_Kabuli_Chr07              | 12913811                       | (T/A)       |
| 12417       | CakSNP12417    | <i>Kabuli</i>    | Ca_Kabuli_Chr07              | 13020788                       | (C/T)       |
| 12418       | CakSNP12418    | <i>Kabuli</i>    | Ca_Kabuli_Chr07              | 13020772                       | (A/G)       |
| 12419       | CakSNP12419    | <i>Kabuli</i>    | Ca_Kabuli_Chr07              | 13021047                       | (A/G)       |
| 12420       | CakSNP12420    | <i>Kabuli</i>    | Ca_Kabuli_Chr07              | 13021030                       | (A/G)       |
| 12421       | CakSNP12421    | <i>Kabuli</i>    | Ca_Kabuli_Chr07              | 13059710                       | (C/A)       |
| 12422       | CakSNP12422    | <i>Kabuli</i>    | Ca_Kabuli_Chr07              | 13059712                       | (C/A)       |
| 12423       | CakSNP12423    | <i>Kabuli</i>    | Ca_Kabuli_Chr07              | 13059717                       | (T/A)       |
| 12424       | CakSNP12424    | <i>Kabuli</i>    | Ca_Kabuli_Chr07              | 13059852                       | (G/A)       |
| 12425       | CakSNP12425    | <i>Kabuli</i>    | Ca_Kabuli_Chr07              | 13172542                       | (A/G)       |

| <b>S.N.</b> | <b>SNP IDs</b> | <b>Cultivars</b> | <b>Chromosomes/scaffolds</b> | <b>Physical positions (bp)</b> | <b>SNPs</b> |
|-------------|----------------|------------------|------------------------------|--------------------------------|-------------|
| 12426       | CakSNP12426    | <i>Kabuli</i>    | Ca_Kabuli_Chr07              | 13220439                       | (G/A)       |
| 12427       | CakSNP12427    | <i>Kabuli</i>    | Ca_Kabuli_Chr07              | 13220418                       | (A/G)       |
| 12428       | CakSNP12428    | <i>Kabuli</i>    | Ca_Kabuli_Chr07              | 13262430                       | (C/T)       |
| 12429       | CakSNP12429    | <i>Kabuli</i>    | Ca_Kabuli_Chr07              | 13281255                       | (T/C)       |
| 12430       | CakSNP12430    | <i>Kabuli</i>    | Ca_Kabuli_Chr07              | 13281290                       | (A/G)       |
| 12431       | CakSNP12431    | <i>Kabuli</i>    | Ca_Kabuli_Chr07              | 13281297                       | (C/G)       |
| 12432       | CakSNP12432    | <i>Kabuli</i>    | Ca_Kabuli_Chr07              | 13281307                       | (C/T)       |
| 12433       | CakSNP12433    | <i>Kabuli</i>    | Ca_Kabuli_Chr07              | 13281313                       | (T/C)       |
| 12434       | CakSNP12434    | <i>Kabuli</i>    | Ca_Kabuli_Chr07              | 13281314                       | (G/A)       |
| 12435       | CakSNP12435    | <i>Kabuli</i>    | Ca_Kabuli_Chr07              | 13281374                       | (G/T)       |
| 12436       | CakSNP12436    | <i>Kabuli</i>    | Ca_Kabuli_Chr07              | 13281351                       | (T/A)       |
| 12437       | CakSNP12437    | <i>Kabuli</i>    | Ca_Kabuli_Chr07              | 13288828                       | (G/A)       |
| 12438       | CakSNP12438    | <i>Kabuli</i>    | Ca_Kabuli_Chr07              | 13288813                       | (G/A)       |
| 12439       | CakSNP12439    | <i>Kabuli</i>    | Ca_Kabuli_Chr07              | 13288753                       | (A/C)       |
| 12440       | CakSNP12440    | <i>Kabuli</i>    | Ca_Kabuli_Chr07              | 13319871                       | (A/G)       |
| 12441       | CakSNP12441    | <i>Kabuli</i>    | Ca_Kabuli_Chr07              | 13514074                       | (C/T)       |
| 12442       | CakSNP12442    | <i>Kabuli</i>    | Ca_Kabuli_Chr07              | 13605200                       | (A/C)       |
| 12443       | CakSNP12443    | <i>Kabuli</i>    | Ca_Kabuli_Chr07              | 13605191                       | (A/C)       |
| 12444       | CakSNP12444    | <i>Kabuli</i>    | Ca_Kabuli_Chr07              | 13605188                       | (A/C)       |
| 12445       | CakSNP12445    | <i>Kabuli</i>    | Ca_Kabuli_Chr07              | 13605578                       | (C/G)       |
| 12446       | CakSNP12446    | <i>Kabuli</i>    | Ca_Kabuli_Chr07              | 13667102                       | (C/T)       |
| 12447       | CakSNP12447    | <i>Kabuli</i>    | Ca_Kabuli_Chr07              | 13667103                       | (T/G)       |
| 12448       | CakSNP12448    | <i>Kabuli</i>    | Ca_Kabuli_Chr07              | 13730350                       | (A/C)       |
| 12449       | CakSNP12449    | <i>Kabuli</i>    | Ca_Kabuli_Chr07              | 13757159                       | (A/C)       |
| 12450       | CakSNP12450    | <i>Kabuli</i>    | Ca_Kabuli_Chr07              | 13776110                       | (A/C)       |
| 12451       | CakSNP12451    | <i>Kabuli</i>    | Ca_Kabuli_Chr07              | 13781815                       | (T/C)       |
| 12452       | CakSNP12452    | <i>Kabuli</i>    | Ca_Kabuli_Chr07              | 13819387                       | (C/T)       |
| 12453       | CakSNP12453    | <i>Kabuli</i>    | Ca_Kabuli_Chr07              | 13881348                       | (G/A)       |
| 12454       | CakSNP12454    | <i>Kabuli</i>    | Ca_Kabuli_Chr07              | 13893199                       | (T/C)       |
| 12455       | CakSNP12455    | <i>Kabuli</i>    | Ca_Kabuli_Chr07              | 13893344                       | (G/C)       |
| 12456       | CakSNP12456    | <i>Kabuli</i>    | Ca_Kabuli_Chr07              | 13893382                       | (G/T)       |
| 12457       | CakSNP12457    | <i>Kabuli</i>    | Ca_Kabuli_Chr07              | 13893383                       | (C/T)       |
| 12458       | CakSNP12458    | <i>Kabuli</i>    | Ca_Kabuli_Chr07              | 13903980                       | (T/G)       |
| 12459       | CakSNP12459    | <i>Kabuli</i>    | Ca_Kabuli_Chr07              | 13904163                       | (T/C)       |
| 12460       | CakSNP12460    | <i>Kabuli</i>    | Ca_Kabuli_Chr07              | 13913735                       | (A/G)       |
| 12461       | CakSNP12461    | <i>Kabuli</i>    | Ca_Kabuli_Chr07              | 13921214                       | (C/T)       |
| 12462       | CakSNP12462    | <i>Kabuli</i>    | Ca_Kabuli_Chr07              | 13921289                       | (T/C)       |
| 12463       | CakSNP12463    | <i>Kabuli</i>    | Ca_Kabuli_Chr07              | 13949259                       | (A/G)       |

| <b>S.N.</b> | <b>SNP IDs</b> | <b>Cultivars</b> | <b>Chromosomes/scaffolds</b> | <b>Physical positions (bp)</b> | <b>SNPs</b> |
|-------------|----------------|------------------|------------------------------|--------------------------------|-------------|
| 12464       | CakSNP12464    | <i>Kabuli</i>    | Ca_Kabuli_Chr07              | 13949314                       | (G/A)       |
| 12465       | CakSNP12465    | <i>Kabuli</i>    | Ca_Kabuli_Chr07              | 13951874                       | (T/C)       |
| 12466       | CakSNP12466    | <i>Kabuli</i>    | Ca_Kabuli_Chr07              | 13951856                       | (T/C)       |
| 12467       | CakSNP12467    | <i>Kabuli</i>    | Ca_Kabuli_Chr07              | 14030136                       | (C/T)       |
| 12468       | CakSNP12468    | <i>Kabuli</i>    | Ca_Kabuli_Chr07              | 14051146                       | (G/T)       |
| 12469       | CakSNP12469    | <i>Kabuli</i>    | Ca_Kabuli_Chr07              | 14179629                       | (T/G)       |
| 12470       | CakSNP12470    | <i>Kabuli</i>    | Ca_Kabuli_Chr07              | 14179733                       | (C/A)       |
| 12471       | CakSNP12471    | <i>Kabuli</i>    | Ca_Kabuli_Chr07              | 14212570                       | (C/A)       |
| 12472       | CakSNP12472    | <i>Kabuli</i>    | Ca_Kabuli_Chr07              | 14212597                       | (C/G)       |
| 12473       | CakSNP12473    | <i>Kabuli</i>    | Ca_Kabuli_Chr07              | 14233343                       | (T/G)       |
| 12474       | CakSNP12474    | <i>Kabuli</i>    | Ca_Kabuli_Chr07              | 14233368                       | (T/C)       |
| 12475       | CakSNP12475    | <i>Kabuli</i>    | Ca_Kabuli_Chr07              | 14281993                       | (G/T)       |
| 12476       | CakSNP12476    | <i>Kabuli</i>    | Ca_Kabuli_Chr07              | 14282088                       | (T/C)       |
| 12477       | CakSNP12477    | <i>Kabuli</i>    | Ca_Kabuli_Chr07              | 14320216                       | (T/C)       |
| 12478       | CakSNP12478    | <i>Kabuli</i>    | Ca_Kabuli_Chr07              | 14328655                       | (T/C)       |
| 12479       | CakSNP12479    | <i>Kabuli</i>    | Ca_Kabuli_Chr07              | 14328649                       | (T/C)       |
| 12480       | CakSNP12480    | <i>Kabuli</i>    | Ca_Kabuli_Chr07              | 14329126                       | (C/T)       |
| 12481       | CakSNP12481    | <i>Kabuli</i>    | Ca_Kabuli_Chr07              | 14329175                       | (G/A)       |
| 12482       | CakSNP12482    | <i>Kabuli</i>    | Ca_Kabuli_Chr07              | 14329196                       | (G/A)       |
| 12483       | CakSNP12483    | <i>Kabuli</i>    | Ca_Kabuli_Chr07              | 14329217                       | (C/T)       |
| 12484       | CakSNP12484    | <i>Kabuli</i>    | Ca_Kabuli_Chr07              | 14329167                       | (A/T)       |
| 12485       | CakSNP12485    | <i>Kabuli</i>    | Ca_Kabuli_Chr07              | 14345827                       | (T/C)       |
| 12486       | CakSNP12486    | <i>Kabuli</i>    | Ca_Kabuli_Chr07              | 14345799                       | (T/A)       |
| 12487       | CakSNP12487    | <i>Kabuli</i>    | Ca_Kabuli_Chr07              | 14470549                       | (C/G)       |
| 12488       | CakSNP12488    | <i>Kabuli</i>    | Ca_Kabuli_Chr07              | 14518292                       | (A/T)       |
| 12489       | CakSNP12489    | <i>Kabuli</i>    | Ca_Kabuli_Chr07              | 14526546                       | (A/G)       |
| 12490       | CakSNP12490    | <i>Kabuli</i>    | Ca_Kabuli_Chr07              | 14526495                       | (T/C)       |
| 12491       | CakSNP12491    | <i>Kabuli</i>    | Ca_Kabuli_Chr07              | 14526493                       | (C/T)       |
| 12492       | CakSNP12492    | <i>Kabuli</i>    | Ca_Kabuli_Chr07              | 14526480                       | (T/C)       |
| 12493       | CakSNP12493    | <i>Kabuli</i>    | Ca_Kabuli_Chr07              | 14526478                       | (G/C)       |
| 12494       | CakSNP12494    | <i>Kabuli</i>    | Ca_Kabuli_Chr07              | 14558741                       | (C/A)       |
| 12495       | CakSNP12495    | <i>Kabuli</i>    | Ca_Kabuli_Chr07              | 14558785                       | (C/T)       |
| 12496       | CakSNP12496    | <i>Kabuli</i>    | Ca_Kabuli_Chr07              | 14559033                       | (G/A)       |
| 12497       | CakSNP12497    | <i>Kabuli</i>    | Ca_Kabuli_Chr07              | 14666535                       | (T/A)       |
| 12498       | CakSNP12498    | <i>Kabuli</i>    | Ca_Kabuli_Chr07              | 14668939                       | (G/A)       |
| 12499       | CakSNP12499    | <i>Kabuli</i>    | Ca_Kabuli_Chr07              | 14668922                       | (A/C)       |
| 12500       | CakSNP12500    | <i>Kabuli</i>    | Ca_Kabuli_Chr07              | 14685011                       | (G/C)       |
| 12501       | CakSNP12501    | <i>Kabuli</i>    | Ca_Kabuli_Chr07              | 14685017                       | (C/T)       |

| <b>S.N.</b> | <b>SNP IDs</b> | <b>Cultivars</b> | <b>Chromosomes/scaffolds</b> | <b>Physical positions (bp)</b> | <b>SNPs</b> |
|-------------|----------------|------------------|------------------------------|--------------------------------|-------------|
| 12502       | CakSNP12502    | <i>Kabuli</i>    | Ca_Kabuli_Chr07              | 14685024                       | (A/G)       |
| 12503       | CakSNP12503    | <i>Kabuli</i>    | Ca_Kabuli_Chr07              | 14685034                       | (T/G)       |
| 12504       | CakSNP12504    | <i>Kabuli</i>    | Ca_Kabuli_Chr07              | 14712518                       | (C/A)       |
| 12505       | CakSNP12505    | <i>Kabuli</i>    | Ca_Kabuli_Chr07              | 14712568                       | (C/A)       |
| 12506       | CakSNP12506    | <i>Kabuli</i>    | Ca_Kabuli_Chr07              | 14712596                       | (T/C)       |
| 12507       | CakSNP12507    | <i>Kabuli</i>    | Ca_Kabuli_Chr07              | 14712601                       | (C/T)       |
| 12508       | CakSNP12508    | <i>Kabuli</i>    | Ca_Kabuli_Chr07              | 14748257                       | (T/A)       |
| 12509       | CakSNP12509    | <i>Kabuli</i>    | Ca_Kabuli_Chr07              | 14775135                       | (C/G)       |
| 12510       | CakSNP12510    | <i>Kabuli</i>    | Ca_Kabuli_Chr07              | 14782453                       | (A/G)       |
| 12511       | CakSNP12511    | <i>Kabuli</i>    | Ca_Kabuli_Chr07              | 14899028                       | (C/A)       |
| 12512       | CakSNP12512    | <i>Kabuli</i>    | Ca_Kabuli_Chr07              | 14899101                       | (T/C)       |
| 12513       | CakSNP12513    | <i>Kabuli</i>    | Ca_Kabuli_Chr07              | 14933294                       | (T/C)       |
| 12514       | CakSNP12514    | <i>Kabuli</i>    | Ca_Kabuli_Chr07              | 14933286                       | (G/A)       |
| 12515       | CakSNP12515    | <i>Kabuli</i>    | Ca_Kabuli_Chr07              | 14983364                       | (T/G)       |
| 12516       | CakSNP12516    | <i>Kabuli</i>    | Ca_Kabuli_Chr07              | 14997794                       | (G/A)       |
| 12517       | CakSNP12517    | <i>Kabuli</i>    | Ca_Kabuli_Chr07              | 14997883                       | (T/C)       |
| 12518       | CakSNP12518    | <i>Kabuli</i>    | Ca_Kabuli_Chr07              | 15028182                       | (T/G)       |
| 12519       | CakSNP12519    | <i>Kabuli</i>    | Ca_Kabuli_Chr07              | 15039606                       | (T/A)       |
| 12520       | CakSNP12520    | <i>Kabuli</i>    | Ca_Kabuli_Chr07              | 15069817                       | (G/A)       |
| 12521       | CakSNP12521    | <i>Kabuli</i>    | Ca_Kabuli_Chr07              | 15070091                       | (T/A)       |
| 12522       | CakSNP12522    | <i>Kabuli</i>    | Ca_Kabuli_Chr07              | 15119205                       | (T/C)       |
| 12523       | CakSNP12523    | <i>Kabuli</i>    | Ca_Kabuli_Chr07              | 15125638                       | (G/C)       |
| 12524       | CakSNP12524    | <i>Kabuli</i>    | Ca_Kabuli_Chr07              | 15125619                       | (T/G)       |
| 12525       | CakSNP12525    | <i>Kabuli</i>    | Ca_Kabuli_Chr07              | 15185603                       | (A/G)       |
| 12526       | CakSNP12526    | <i>Kabuli</i>    | Ca_Kabuli_Chr07              | 15201600                       | (A/G)       |
| 12527       | CakSNP12527    | <i>Kabuli</i>    | Ca_Kabuli_Chr07              | 15399421                       | (T/C)       |
| 12528       | CakSNP12528    | <i>Kabuli</i>    | Ca_Kabuli_Chr07              | 15441316                       | (A/T)       |
| 12529       | CakSNP12529    | <i>Kabuli</i>    | Ca_Kabuli_Chr07              | 15463183                       | (G/T)       |
| 12530       | CakSNP12530    | <i>Kabuli</i>    | Ca_Kabuli_Chr07              | 15463170                       | (G/A)       |
| 12531       | CakSNP12531    | <i>Kabuli</i>    | Ca_Kabuli_Chr07              | 15463169                       | (G/A)       |
| 12532       | CakSNP12532    | <i>Kabuli</i>    | Ca_Kabuli_Chr07              | 15530329                       | (G/T)       |
| 12533       | CakSNP12533    | <i>Kabuli</i>    | Ca_Kabuli_Chr07              | 15530316                       | (G/A)       |
| 12534       | CakSNP12534    | <i>Kabuli</i>    | Ca_Kabuli_Chr07              | 15530315                       | (G/A)       |
| 12535       | CakSNP12535    | <i>Kabuli</i>    | Ca_Kabuli_Chr07              | 15568060                       | (G/T)       |
| 12536       | CakSNP12536    | <i>Kabuli</i>    | Ca_Kabuli_Chr07              | 15568047                       | (G/A)       |
| 12537       | CakSNP12537    | <i>Kabuli</i>    | Ca_Kabuli_Chr07              | 15568046                       | (G/A)       |
| 12538       | CakSNP12538    | <i>Kabuli</i>    | Ca_Kabuli_Chr07              | 15622247                       | (G/A)       |
| 12539       | CakSNP12539    | <i>Kabuli</i>    | Ca_Kabuli_Chr07              | 15622245                       | (T/A)       |

| <b>S.N.</b> | <b>SNP IDs</b> | <b>Cultivars</b> | <b>Chromosomes/scaffolds</b> | <b>Physical positions (bp)</b> | <b>SNPs</b> |
|-------------|----------------|------------------|------------------------------|--------------------------------|-------------|
| 12540       | CakSNP12540    | <i>Kabuli</i>    | Ca_Kabuli_Chr07              | 15762068                       | (A/T)       |
| 12541       | CakSNP12541    | <i>Kabuli</i>    | Ca_Kabuli_Chr07              | 15826588                       | (A/C)       |
| 12542       | CakSNP12542    | <i>Kabuli</i>    | Ca_Kabuli_Chr07              | 15856789                       | (A/G)       |
| 12543       | CakSNP12543    | <i>Kabuli</i>    | Ca_Kabuli_Chr07              | 15856955                       | (T/G)       |
| 12544       | CakSNP12544    | <i>Kabuli</i>    | Ca_Kabuli_Chr07              | 15860298                       | (T/C)       |
| 12545       | CakSNP12545    | <i>Kabuli</i>    | Ca_Kabuli_Chr07              | 15887790                       | (T/C)       |
| 12546       | CakSNP12546    | <i>Kabuli</i>    | Ca_Kabuli_Chr07              | 15966680                       | (A/G)       |
| 12547       | CakSNP12547    | <i>Kabuli</i>    | Ca_Kabuli_Chr07              | 15966714                       | (G/A)       |
| 12548       | CakSNP12548    | <i>Kabuli</i>    | Ca_Kabuli_Chr07              | 16008746                       | (T/C)       |
| 12549       | CakSNP12549    | <i>Kabuli</i>    | Ca_Kabuli_Chr07              | 16008733                       | (A/G)       |
| 12550       | CakSNP12550    | <i>Kabuli</i>    | Ca_Kabuli_Chr07              | 16289811                       | (C/T)       |
| 12551       | CakSNP12551    | <i>Kabuli</i>    | Ca_Kabuli_Chr07              | 16289802                       | (C/T)       |
| 12552       | CakSNP12552    | <i>Kabuli</i>    | Ca_Kabuli_Chr07              | 16289794                       | (G/T)       |
| 12553       | CakSNP12553    | <i>Kabuli</i>    | Ca_Kabuli_Chr07              | 16324985                       | (T/C)       |
| 12554       | CakSNP12554    | <i>Kabuli</i>    | Ca_Kabuli_Chr07              | 16331943                       | (A/G)       |
| 12555       | CakSNP12555    | <i>Kabuli</i>    | Ca_Kabuli_Chr07              | 16381854                       | (T/C)       |
| 12556       | CakSNP12556    | <i>Kabuli</i>    | Ca_Kabuli_Chr07              | 16381891                       | (T/G)       |
| 12557       | CakSNP12557    | <i>Kabuli</i>    | Ca_Kabuli_Chr07              | 16381934                       | (T/C)       |
| 12558       | CakSNP12558    | <i>Kabuli</i>    | Ca_Kabuli_Chr07              | 16466619                       | (T/C)       |
| 12559       | CakSNP12559    | <i>Kabuli</i>    | Ca_Kabuli_Chr07              | 16581695                       | (C/G)       |
| 12560       | CakSNP12560    | <i>Kabuli</i>    | Ca_Kabuli_Chr07              | 16626047                       | (T/G)       |
| 12561       | CakSNP12561    | <i>Kabuli</i>    | Ca_Kabuli_Chr07              | 16626703                       | (A/G)       |
| 12562       | CakSNP12562    | <i>Kabuli</i>    | Ca_Kabuli_Chr07              | 16665577                       | (A/G)       |
| 12563       | CakSNP12563    | <i>Kabuli</i>    | Ca_Kabuli_Chr07              | 16735437                       | (G/A)       |
| 12564       | CakSNP12564    | <i>Kabuli</i>    | Ca_Kabuli_Chr07              | 16735427                       | (A/G)       |
| 12565       | CakSNP12565    | <i>Kabuli</i>    | Ca_Kabuli_Chr07              | 16735423                       | (G/C)       |
| 12566       | CakSNP12566    | <i>Kabuli</i>    | Ca_Kabuli_Chr07              | 16816296                       | (G/C)       |
| 12567       | CakSNP12567    | <i>Kabuli</i>    | Ca_Kabuli_Chr07              | 16821274                       | (A/C)       |
| 12568       | CakSNP12568    | <i>Kabuli</i>    | Ca_Kabuli_Chr07              | 16829081                       | (C/A)       |
| 12569       | CakSNP12569    | <i>Kabuli</i>    | Ca_Kabuli_Chr07              | 16897329                       | (A/C)       |
| 12570       | CakSNP12570    | <i>Kabuli</i>    | Ca_Kabuli_Chr07              | 16897285                       | (T/C)       |
| 12571       | CakSNP12571    | <i>Kabuli</i>    | Ca_Kabuli_Chr07              | 16936123                       | (C/G)       |
| 12572       | CakSNP12572    | <i>Kabuli</i>    | Ca_Kabuli_Chr07              | 17017466                       | (C/G)       |
| 12573       | CakSNP12573    | <i>Kabuli</i>    | Ca_Kabuli_Chr07              | 17017453                       | (A/G)       |
| 12574       | CakSNP12574    | <i>Kabuli</i>    | Ca_Kabuli_Chr07              | 17017447                       | (A/G)       |
| 12575       | CakSNP12575    | <i>Kabuli</i>    | Ca_Kabuli_Chr07              | 17017438                       | (A/T)       |
| 12576       | CakSNP12576    | <i>Kabuli</i>    | Ca_Kabuli_Chr07              | 17017421                       | (G/A)       |
| 12577       | CakSNP12577    | <i>Kabuli</i>    | Ca_Kabuli_Chr07              | 17017418                       | (T/G)       |

| <b>S.N.</b> | <b>SNP IDs</b> | <b>Cultivars</b> | <b>Chromosomes/scaffolds</b> | <b>Physical positions (bp)</b> | <b>SNPs</b> |
|-------------|----------------|------------------|------------------------------|--------------------------------|-------------|
| 12578       | CakSNP12578    | <i>Kabuli</i>    | Ca_Kabuli_Chr07              | 17038317                       | (G/A)       |
| 12579       | CakSNP12579    | <i>Kabuli</i>    | Ca_Kabuli_Chr07              | 17064968                       | (T/C)       |
| 12580       | CakSNP12580    | <i>Kabuli</i>    | Ca_Kabuli_Chr07              | 17088603                       | (A/G)       |
| 12581       | CakSNP12581    | <i>Kabuli</i>    | Ca_Kabuli_Chr07              | 17140664                       | (C/T)       |
| 12582       | CakSNP12582    | <i>Kabuli</i>    | Ca_Kabuli_Chr07              | 17178847                       | (A/C)       |
| 12583       | CakSNP12583    | <i>Kabuli</i>    | Ca_Kabuli_Chr07              | 17181160                       | (G/C)       |
| 12584       | CakSNP12584    | <i>Kabuli</i>    | Ca_Kabuli_Chr07              | 17228904                       | (T/G)       |
| 12585       | CakSNP12585    | <i>Kabuli</i>    | Ca_Kabuli_Chr07              | 17318174                       | (G/T)       |
| 12586       | CakSNP12586    | <i>Kabuli</i>    | Ca_Kabuli_Chr07              | 17539110                       | (G/A)       |
| 12587       | CakSNP12587    | <i>Kabuli</i>    | Ca_Kabuli_Chr07              | 17539136                       | (C/A)       |
| 12588       | CakSNP12588    | <i>Kabuli</i>    | Ca_Kabuli_Chr07              | 17539207                       | (G/A)       |
| 12589       | CakSNP12589    | <i>Kabuli</i>    | Ca_Kabuli_Chr07              | 17586154                       | (C/T)       |
| 12590       | CakSNP12590    | <i>Kabuli</i>    | Ca_Kabuli_Chr07              | 17591798                       | (T/A)       |
| 12591       | CakSNP12591    | <i>Kabuli</i>    | Ca_Kabuli_Chr07              | 17591781                       | (G/A)       |
| 12592       | CakSNP12592    | <i>Kabuli</i>    | Ca_Kabuli_Chr07              | 17591843                       | (G/T)       |
| 12593       | CakSNP12593    | <i>Kabuli</i>    | Ca_Kabuli_Chr07              | 17591974                       | (A/G)       |
| 12594       | CakSNP12594    | <i>Kabuli</i>    | Ca_Kabuli_Chr07              | 17591971                       | (A/G)       |
| 12595       | CakSNP12595    | <i>Kabuli</i>    | Ca_Kabuli_Chr07              | 17591924                       | (T/C)       |
| 12596       | CakSNP12596    | <i>Kabuli</i>    | Ca_Kabuli_Chr07              | 17592701                       | (C/A)       |
| 12597       | CakSNP12597    | <i>Kabuli</i>    | Ca_Kabuli_Chr07              | 17597348                       | (T/C)       |
| 12598       | CakSNP12598    | <i>Kabuli</i>    | Ca_Kabuli_Chr07              | 17597421                       | (A/G)       |
| 12599       | CakSNP12599    | <i>Kabuli</i>    | Ca_Kabuli_Chr07              | 17597420                       | (C/T)       |
| 12600       | CakSNP12600    | <i>Kabuli</i>    | Ca_Kabuli_Chr07              | 17624143                       | (G/A)       |
| 12601       | CakSNP12601    | <i>Kabuli</i>    | Ca_Kabuli_Chr07              | 17624225                       | (T/C)       |
| 12602       | CakSNP12602    | <i>Kabuli</i>    | Ca_Kabuli_Chr07              | 17766520                       | (T/C)       |
| 12603       | CakSNP12603    | <i>Kabuli</i>    | Ca_Kabuli_Chr07              | 17766952                       | (T/A)       |
| 12604       | CakSNP12604    | <i>Kabuli</i>    | Ca_Kabuli_Chr07              | 17766914                       | (C/A)       |
| 12605       | CakSNP12605    | <i>Kabuli</i>    | Ca_Kabuli_Chr07              | 17779414                       | (A/G)       |
| 12606       | CakSNP12606    | <i>Kabuli</i>    | Ca_Kabuli_Chr07              | 17779594                       | (T/C)       |
| 12607       | CakSNP12607    | <i>Kabuli</i>    | Ca_Kabuli_Chr07              | 17779700                       | (A/T)       |
| 12608       | CakSNP12608    | <i>Kabuli</i>    | Ca_Kabuli_Chr07              | 17782558                       | (C/T)       |
| 12609       | CakSNP12609    | <i>Kabuli</i>    | Ca_Kabuli_Chr07              | 18011604                       | (G/C)       |
| 12610       | CakSNP12610    | <i>Kabuli</i>    | Ca_Kabuli_Chr07              | 18090289                       | (T/A)       |
| 12611       | CakSNP12611    | <i>Kabuli</i>    | Ca_Kabuli_Chr07              | 18265803                       | (A/C)       |
| 12612       | CakSNP12612    | <i>Kabuli</i>    | Ca_Kabuli_Chr07              | 18265791                       | (G/C)       |
| 12613       | CakSNP12613    | <i>Kabuli</i>    | Ca_Kabuli_Chr07              | 18265782                       | (G/C)       |
| 12614       | CakSNP12614    | <i>Kabuli</i>    | Ca_Kabuli_Chr07              | 18319049                       | (T/G)       |
| 12615       | CakSNP12615    | <i>Kabuli</i>    | Ca_Kabuli_Chr07              | 18319073                       | (T/G)       |

| <b>S.N.</b> | <b>SNP IDs</b> | <b>Cultivars</b> | <b>Chromosomes/scaffolds</b> | <b>Physical positions (bp)</b> | <b>SNPs</b> |
|-------------|----------------|------------------|------------------------------|--------------------------------|-------------|
| 12616       | CakSNP12616    | <i>Kabuli</i>    | Ca_Kabuli_Chr07              | 18365218                       | (G/A)       |
| 12617       | CakSNP12617    | <i>Kabuli</i>    | Ca_Kabuli_Chr07              | 18430468                       | (C/T)       |
| 12618       | CakSNP12618    | <i>Kabuli</i>    | Ca_Kabuli_Chr07              | 18469372                       | (G/A)       |
| 12619       | CakSNP12619    | <i>Kabuli</i>    | Ca_Kabuli_Chr07              | 18469422                       | (C/T)       |
| 12620       | CakSNP12620    | <i>Kabuli</i>    | Ca_Kabuli_Chr07              | 18638565                       | (A/G)       |
| 12621       | CakSNP12621    | <i>Kabuli</i>    | Ca_Kabuli_Chr07              | 18642538                       | (A/G)       |
| 12622       | CakSNP12622    | <i>Kabuli</i>    | Ca_Kabuli_Chr07              | 18658563                       | (C/G)       |
| 12623       | CakSNP12623    | <i>Kabuli</i>    | Ca_Kabuli_Chr07              | 18696645                       | (G/A)       |
| 12624       | CakSNP12624    | <i>Kabuli</i>    | Ca_Kabuli_Chr07              | 18796748                       | (T/C)       |
| 12625       | CakSNP12625    | <i>Kabuli</i>    | Ca_Kabuli_Chr07              | 18796768                       | (A/G)       |
| 12626       | CakSNP12626    | <i>Kabuli</i>    | Ca_Kabuli_Chr07              | 18910468                       | (A/G)       |
| 12627       | CakSNP12627    | <i>Kabuli</i>    | Ca_Kabuli_Chr07              | 19042183                       | (C/T)       |
| 12628       | CakSNP12628    | <i>Kabuli</i>    | Ca_Kabuli_Chr07              | 19189737                       | (A/C)       |
| 12629       | CakSNP12629    | <i>Kabuli</i>    | Ca_Kabuli_Chr07              | 19217501                       | (A/C)       |
| 12630       | CakSNP12630    | <i>Kabuli</i>    | Ca_Kabuli_Chr07              | 19217598                       | (G/C)       |
| 12631       | CakSNP12631    | <i>Kabuli</i>    | Ca_Kabuli_Chr07              | 19232818                       | (T/A)       |
| 12632       | CakSNP12632    | <i>Kabuli</i>    | Ca_Kabuli_Chr07              | 19290521                       | (G/A)       |
| 12633       | CakSNP12633    | <i>Kabuli</i>    | Ca_Kabuli_Chr07              | 19470527                       | (T/C)       |
| 12634       | CakSNP12634    | <i>Kabuli</i>    | Ca_Kabuli_Chr07              | 19472719                       | (G/A)       |
| 12635       | CakSNP12635    | <i>Kabuli</i>    | Ca_Kabuli_Chr07              | 19472689                       | (T/A)       |
| 12636       | CakSNP12636    | <i>Kabuli</i>    | Ca_Kabuli_Chr07              | 19542901                       | (A/G)       |
| 12637       | CakSNP12637    | <i>Kabuli</i>    | Ca_Kabuli_Chr07              | 19549636                       | (C/T)       |
| 12638       | CakSNP12638    | <i>Kabuli</i>    | Ca_Kabuli_Chr07              | 19707812                       | (T/A)       |
| 12639       | CakSNP12639    | <i>Kabuli</i>    | Ca_Kabuli_Chr07              | 19707842                       | (G/A)       |
| 12640       | CakSNP12640    | <i>Kabuli</i>    | Ca_Kabuli_Chr07              | 19818789                       | (C/A)       |
| 12641       | CakSNP12641    | <i>Kabuli</i>    | Ca_Kabuli_Chr07              | 19818770                       | (T/C)       |
| 12642       | CakSNP12642    | <i>Kabuli</i>    | Ca_Kabuli_Chr07              | 19818759                       | (G/C)       |
| 12643       | CakSNP12643    | <i>Kabuli</i>    | Ca_Kabuli_Chr07              | 19818757                       | (G/C)       |
| 12644       | CakSNP12644    | <i>Kabuli</i>    | Ca_Kabuli_Chr07              | 20031805                       | (T/C)       |
| 12645       | CakSNP12645    | <i>Kabuli</i>    | Ca_Kabuli_Chr07              | 20032205                       | (A/C)       |
| 12646       | CakSNP12646    | <i>Kabuli</i>    | Ca_Kabuli_Chr07              | 20082842                       | (T/C)       |
| 12647       | CakSNP12647    | <i>Kabuli</i>    | Ca_Kabuli_Chr07              | 20083040                       | (A/T)       |
| 12648       | CakSNP12648    | <i>Kabuli</i>    | Ca_Kabuli_Chr07              | 20099384                       | (C/T)       |
| 12649       | CakSNP12649    | <i>Kabuli</i>    | Ca_Kabuli_Chr07              | 20111019                       | (T/C)       |
| 12650       | CakSNP12650    | <i>Kabuli</i>    | Ca_Kabuli_Chr07              | 20111123                       | (T/C)       |
| 12651       | CakSNP12651    | <i>Kabuli</i>    | Ca_Kabuli_Chr07              | 20112897                       | (G/A)       |
| 12652       | CakSNP12652    | <i>Kabuli</i>    | Ca_Kabuli_Chr07              | 20135647                       | (C/G)       |
| 12653       | CakSNP12653    | <i>Kabuli</i>    | Ca_Kabuli_Chr07              | 20168870                       | (T/A)       |

| <b>S.N.</b> | <b>SNP IDs</b> | <b>Cultivars</b> | <b>Chromosomes/scaffolds</b> | <b>Physical positions (bp)</b> | <b>SNPs</b> |
|-------------|----------------|------------------|------------------------------|--------------------------------|-------------|
| 12654       | CakSNP12654    | <i>Kabuli</i>    | Ca_Kabuli_Chr07              | 20252133                       | (T/C)       |
| 12655       | CakSNP12655    | <i>Kabuli</i>    | Ca_Kabuli_Chr07              | 20252134                       | (G/A)       |
| 12656       | CakSNP12656    | <i>Kabuli</i>    | Ca_Kabuli_Chr07              | 20252135                       | (A/G)       |
| 12657       | CakSNP12657    | <i>Kabuli</i>    | Ca_Kabuli_Chr07              | 20252144                       | (G/A)       |
| 12658       | CakSNP12658    | <i>Kabuli</i>    | Ca_Kabuli_Chr07              | 20252145                       | (A/G)       |
| 12659       | CakSNP12659    | <i>Kabuli</i>    | Ca_Kabuli_Chr07              | 20252181                       | (C/T)       |
| 12660       | CakSNP12660    | <i>Kabuli</i>    | Ca_Kabuli_Chr07              | 20252192                       | (G/A)       |
| 12661       | CakSNP12661    | <i>Kabuli</i>    | Ca_Kabuli_Chr07              | 20252201                       | (C/A)       |
| 12662       | CakSNP12662    | <i>Kabuli</i>    | Ca_Kabuli_Chr07              | 20252212                       | (C/T)       |
| 12663       | CakSNP12663    | <i>Kabuli</i>    | Ca_Kabuli_Chr07              | 20252214                       | (C/G)       |
| 12664       | CakSNP12664    | <i>Kabuli</i>    | Ca_Kabuli_Chr07              | 20252236                       | (G/A)       |
| 12665       | CakSNP12665    | <i>Kabuli</i>    | Ca_Kabuli_Chr07              | 20252234                       | (A/C)       |
| 12666       | CakSNP12666    | <i>Kabuli</i>    | Ca_Kabuli_Chr07              | 20252233                       | (C/T)       |
| 12667       | CakSNP12667    | <i>Kabuli</i>    | Ca_Kabuli_Chr07              | 20252221                       | (T/C)       |
| 12668       | CakSNP12668    | <i>Kabuli</i>    | Ca_Kabuli_Chr07              | 20252209                       | (G/A)       |
| 12669       | CakSNP12669    | <i>Kabuli</i>    | Ca_Kabuli_Chr07              | 20252309                       | (C/T)       |
| 12670       | CakSNP12670    | <i>Kabuli</i>    | Ca_Kabuli_Chr07              | 20252334                       | (A/T)       |
| 12671       | CakSNP12671    | <i>Kabuli</i>    | Ca_Kabuli_Chr07              | 20252340                       | (A/G)       |
| 12672       | CakSNP12672    | <i>Kabuli</i>    | Ca_Kabuli_Chr07              | 20362883                       | (G/A)       |
| 12673       | CakSNP12673    | <i>Kabuli</i>    | Ca_Kabuli_Chr07              | 20362879                       | (C/T)       |
| 12674       | CakSNP12674    | <i>Kabuli</i>    | Ca_Kabuli_Chr07              | 20362876                       | (G/A)       |
| 12675       | CakSNP12675    | <i>Kabuli</i>    | Ca_Kabuli_Chr07              | 20362838                       | (T/C)       |
| 12676       | CakSNP12676    | <i>Kabuli</i>    | Ca_Kabuli_Chr07              | 20414653                       | (G/A)       |
| 12677       | CakSNP12677    | <i>Kabuli</i>    | Ca_Kabuli_Chr07              | 20414703                       | (C/A)       |
| 12678       | CakSNP12678    | <i>Kabuli</i>    | Ca_Kabuli_Chr07              | 20486247                       | (T/G)       |
| 12679       | CakSNP12679    | <i>Kabuli</i>    | Ca_Kabuli_Chr07              | 20486280                       | (G/C)       |
| 12680       | CakSNP12680    | <i>Kabuli</i>    | Ca_Kabuli_Chr07              | 20496378                       | (G/A)       |
| 12681       | CakSNP12681    | <i>Kabuli</i>    | Ca_Kabuli_Chr07              | 20496303                       | (C/T)       |
| 12682       | CakSNP12682    | <i>Kabuli</i>    | Ca_Kabuli_Chr07              | 20496438                       | (C/T)       |
| 12683       | CakSNP12683    | <i>Kabuli</i>    | Ca_Kabuli_Chr07              | 20498552                       | (T/C)       |
| 12684       | CakSNP12684    | <i>Kabuli</i>    | Ca_Kabuli_Chr07              | 20498626                       | (T/G)       |
| 12685       | CakSNP12685    | <i>Kabuli</i>    | Ca_Kabuli_Chr07              | 20540780                       | (C/T)       |
| 12686       | CakSNP12686    | <i>Kabuli</i>    | Ca_Kabuli_Chr07              | 20540791                       | (G/A)       |
| 12687       | CakSNP12687    | <i>Kabuli</i>    | Ca_Kabuli_Chr07              | 20543119                       | (T/C)       |
| 12688       | CakSNP12688    | <i>Kabuli</i>    | Ca_Kabuli_Chr07              | 20550563                       | (G/A)       |
| 12689       | CakSNP12689    | <i>Kabuli</i>    | Ca_Kabuli_Chr07              | 20550575                       | (C/G)       |
| 12690       | CakSNP12690    | <i>Kabuli</i>    | Ca_Kabuli_Chr07              | 20552041                       | (G/A)       |
| 12691       | CakSNP12691    | <i>Kabuli</i>    | Ca_Kabuli_Chr07              | 20552053                       | (C/G)       |



| <b>S.N.</b> | <b>SNP IDs</b> | <b>Cultivars</b> | <b>Chromosomes/scaffolds</b> | <b>Physical positions (bp)</b> | <b>SNPs</b> |
|-------------|----------------|------------------|------------------------------|--------------------------------|-------------|
| 12692       | CakSNP12692    | <i>Kabuli</i>    | Ca_Kabuli_Chr07              | 20556466                       | (G/C)       |
| 12693       | CakSNP12693    | <i>Kabuli</i>    | Ca_Kabuli_Chr07              | 20556576                       | (C/T)       |
| 12694       | CakSNP12694    | <i>Kabuli</i>    | Ca_Kabuli_Chr07              | 20563931                       | (G/A)       |
| 12695       | CakSNP12695    | <i>Kabuli</i>    | Ca_Kabuli_Chr07              | 20564024                       | (G/A)       |
| 12696       | CakSNP12696    | <i>Kabuli</i>    | Ca_Kabuli_Chr07              | 20564266                       | (G/A)       |
| 12697       | CakSNP12697    | <i>Kabuli</i>    | Ca_Kabuli_Chr07              | 20564269                       | (C/T)       |
| 12698       | CakSNP12698    | <i>Kabuli</i>    | Ca_Kabuli_Chr07              | 20564297                       | (A/G)       |
| 12699       | CakSNP12699    | <i>Kabuli</i>    | Ca_Kabuli_Chr07              | 20579963                       | (G/T)       |
| 12700       | CakSNP12700    | <i>Kabuli</i>    | Ca_Kabuli_Chr07              | 20579974                       | (A/T)       |
| 12701       | CakSNP12701    | <i>Kabuli</i>    | Ca_Kabuli_Chr07              | 20585997                       | (T/G)       |
| 12702       | CakSNP12702    | <i>Kabuli</i>    | Ca_Kabuli_Chr07              | 20605389                       | (G/A)       |
| 12703       | CakSNP12703    | <i>Kabuli</i>    | Ca_Kabuli_Chr07              | 20605384                       | (C/G)       |
| 12704       | CakSNP12704    | <i>Kabuli</i>    | Ca_Kabuli_Chr07              | 20605373                       | (C/A)       |
| 12705       | CakSNP12705    | <i>Kabuli</i>    | Ca_Kabuli_Chr07              | 20633040                       | (A/G)       |
| 12706       | CakSNP12706    | <i>Kabuli</i>    | Ca_Kabuli_Chr07              | 20637152                       | (G/A)       |
| 12707       | CakSNP12707    | <i>Kabuli</i>    | Ca_Kabuli_Chr07              | 20917747                       | (A/G)       |
| 12708       | CakSNP12708    | <i>Kabuli</i>    | Ca_Kabuli_Chr07              | 20917743                       | (T/G)       |
| 12709       | CakSNP12709    | <i>Kabuli</i>    | Ca_Kabuli_Chr07              | 20917740                       | (A/G)       |
| 12710       | CakSNP12710    | <i>Kabuli</i>    | Ca_Kabuli_Chr07              | 21073385                       | (A/C)       |
| 12711       | CakSNP12711    | <i>Kabuli</i>    | Ca_Kabuli_Chr07              | 21081969                       | (A/G)       |
| 12712       | CakSNP12712    | <i>Kabuli</i>    | Ca_Kabuli_Chr07              | 21099782                       | (G/T)       |
| 12713       | CakSNP12713    | <i>Kabuli</i>    | Ca_Kabuli_Chr07              | 21402075                       | (A/G)       |
| 12714       | CakSNP12714    | <i>Kabuli</i>    | Ca_Kabuli_Chr07              | 21402117                       | (A/C)       |
| 12715       | CakSNP12715    | <i>Kabuli</i>    | Ca_Kabuli_Chr07              | 21595525                       | (C/T)       |
| 12716       | CakSNP12716    | <i>Kabuli</i>    | Ca_Kabuli_Chr07              | 21595527                       | (T/G)       |
| 12717       | CakSNP12717    | <i>Kabuli</i>    | Ca_Kabuli_Chr07              | 21616285                       | (A/G)       |
| 12718       | CakSNP12718    | <i>Kabuli</i>    | Ca_Kabuli_Chr07              | 21616287                       | (T/G)       |
| 12719       | CakSNP12719    | <i>Kabuli</i>    | Ca_Kabuli_Chr07              | 21616294                       | (T/G)       |
| 12720       | CakSNP12720    | <i>Kabuli</i>    | Ca_Kabuli_Chr07              | 21626752                       | (T/C)       |
| 12721       | CakSNP12721    | <i>Kabuli</i>    | Ca_Kabuli_Chr07              | 21633103                       | (C/G)       |
| 12722       | CakSNP12722    | <i>Kabuli</i>    | Ca_Kabuli_Chr07              | 21639234                       | (G/A)       |
| 12723       | CakSNP12723    | <i>Kabuli</i>    | Ca_Kabuli_Chr07              | 21639238                       | (G/A)       |
| 12724       | CakSNP12724    | <i>Kabuli</i>    | Ca_Kabuli_Chr07              | 21639244                       | (T/G)       |
| 12725       | CakSNP12725    | <i>Kabuli</i>    | Ca_Kabuli_Chr07              | 21639251                       | (T/G)       |
| 12726       | CakSNP12726    | <i>Kabuli</i>    | Ca_Kabuli_Chr07              | 21639254                       | (T/G)       |
| 12727       | CakSNP12727    | <i>Kabuli</i>    | Ca_Kabuli_Chr07              | 21639375                       | (T/G)       |
| 12728       | CakSNP12728    | <i>Kabuli</i>    | Ca_Kabuli_Chr07              | 21644279                       | (C/T)       |
| 12729       | CakSNP12729    | <i>Kabuli</i>    | Ca_Kabuli_Chr07              | 21644342                       | (G/A)       |

| <b>S.N.</b> | <b>SNP IDs</b> | <b>Cultivars</b> | <b>Chromosomes/scaffolds</b> | <b>Physical positions (bp)</b> | <b>SNPs</b> |
|-------------|----------------|------------------|------------------------------|--------------------------------|-------------|
| 12730       | CakSNP12730    | <i>Kabuli</i>    | Ca_Kabuli_Chr07              | 21713147                       | (T/G)       |
| 12731       | CakSNP12731    | <i>Kabuli</i>    | Ca_Kabuli_Chr07              | 21744514                       | (T/C)       |
| 12732       | CakSNP12732    | <i>Kabuli</i>    | Ca_Kabuli_Chr07              | 21918052                       | (G/C)       |
| 12733       | CakSNP12733    | <i>Kabuli</i>    | Ca_Kabuli_Chr07              | 22707297                       | (T/C)       |
| 12734       | CakSNP12734    | <i>Kabuli</i>    | Ca_Kabuli_Chr07              | 22721356                       | (A/C)       |
| 12735       | CakSNP12735    | <i>Kabuli</i>    | Ca_Kabuli_Chr07              | 22738152                       | (C/G)       |
| 12736       | CakSNP12736    | <i>Kabuli</i>    | Ca_Kabuli_Chr07              | 22738307                       | (G/C)       |
| 12737       | CakSNP12737    | <i>Kabuli</i>    | Ca_Kabuli_Chr07              | 22738482                       | (A/G)       |
| 12738       | CakSNP12738    | <i>Kabuli</i>    | Ca_Kabuli_Chr07              | 22808696                       | (A/G)       |
| 12739       | CakSNP12739    | <i>Kabuli</i>    | Ca_Kabuli_Chr07              | 22808695                       | (C/T)       |
| 12740       | CakSNP12740    | <i>Kabuli</i>    | Ca_Kabuli_Chr07              | 22808687                       | (C/T)       |
| 12741       | CakSNP12741    | <i>Kabuli</i>    | Ca_Kabuli_Chr07              | 22808717                       | (C/T)       |
| 12742       | CakSNP12742    | <i>Kabuli</i>    | Ca_Kabuli_Chr07              | 22808679                       | (A/C)       |
| 12743       | CakSNP12743    | <i>Kabuli</i>    | Ca_Kabuli_Chr07              | 22839776                       | (G/A)       |
| 12744       | CakSNP12744    | <i>Kabuli</i>    | Ca_Kabuli_Chr07              | 22875652                       | (A/G)       |
| 12745       | CakSNP12745    | <i>Kabuli</i>    | Ca_Kabuli_Chr07              | 23087696                       | (T/C)       |
| 12746       | CakSNP12746    | <i>Kabuli</i>    | Ca_Kabuli_Chr07              | 23087732                       | (T/C)       |
| 12747       | CakSNP12747    | <i>Kabuli</i>    | Ca_Kabuli_Chr07              | 23439214                       | (A/G)       |
| 12748       | CakSNP12748    | <i>Kabuli</i>    | Ca_Kabuli_Chr07              | 23439225                       | (C/A)       |
| 12749       | CakSNP12749    | <i>Kabuli</i>    | Ca_Kabuli_Chr07              | 23574823                       | (C/T)       |
| 12750       | CakSNP12750    | <i>Kabuli</i>    | Ca_Kabuli_Chr07              | 23575629                       | (G/A)       |
| 12751       | CakSNP12751    | <i>Kabuli</i>    | Ca_Kabuli_Chr07              | 23616050                       | (A/G)       |
| 12752       | CakSNP12752    | <i>Kabuli</i>    | Ca_Kabuli_Chr07              | 24021690                       | (T/A)       |
| 12753       | CakSNP12753    | <i>Kabuli</i>    | Ca_Kabuli_Chr07              | 24181321                       | (G/A)       |
| 12754       | CakSNP12754    | <i>Kabuli</i>    | Ca_Kabuli_Chr07              | 24190633                       | (G/A)       |
| 12755       | CakSNP12755    | <i>Kabuli</i>    | Ca_Kabuli_Chr07              | 24190636                       | (G/A)       |
| 12756       | CakSNP12756    | <i>Kabuli</i>    | Ca_Kabuli_Chr07              | 24190645                       | (A/T)       |
| 12757       | CakSNP12757    | <i>Kabuli</i>    | Ca_Kabuli_Chr07              | 24190650                       | (G/A)       |
| 12758       | CakSNP12758    | <i>Kabuli</i>    | Ca_Kabuli_Chr07              | 24190671                       | (C/T)       |
| 12759       | CakSNP12759    | <i>Kabuli</i>    | Ca_Kabuli_Chr07              | 24245096                       | (C/T)       |
| 12760       | CakSNP12760    | <i>Kabuli</i>    | Ca_Kabuli_Chr07              | 24415819                       | (T/A)       |
| 12761       | CakSNP12761    | <i>Kabuli</i>    | Ca_Kabuli_Chr07              | 25218407                       | (C/T)       |
| 12762       | CakSNP12762    | <i>Kabuli</i>    | Ca_Kabuli_Chr07              | 25362272                       | (T/C)       |
| 12763       | CakSNP12763    | <i>Kabuli</i>    | Ca_Kabuli_Chr07              | 25428518                       | (T/C)       |
| 12764       | CakSNP12764    | <i>Kabuli</i>    | Ca_Kabuli_Chr07              | 25428525                       | (C/G)       |
| 12765       | CakSNP12765    | <i>Kabuli</i>    | Ca_Kabuli_Chr07              | 25428548                       | (G/T)       |
| 12766       | CakSNP12766    | <i>Kabuli</i>    | Ca_Kabuli_Chr07              | 25428566                       | (T/C)       |
| 12767       | CakSNP12767    | <i>Kabuli</i>    | Ca_Kabuli_Chr07              | 25428660                       | (G/A)       |

| <b>S.N.</b> | <b>SNP IDs</b> | <b>Cultivars</b> | <b>Chromosomes/scaffolds</b> | <b>Physical positions (bp)</b> | <b>SNPs</b> |
|-------------|----------------|------------------|------------------------------|--------------------------------|-------------|
| 12768       | CakSNP12768    | <i>Kabuli</i>    | Ca_Kabuli_Chr07              | 25569665                       | (T/G)       |
| 12769       | CakSNP12769    | <i>Kabuli</i>    | Ca_Kabuli_Chr07              | 25569657                       | (T/C)       |
| 12770       | CakSNP12770    | <i>Kabuli</i>    | Ca_Kabuli_Chr07              | 25740866                       | (G/T)       |
| 12771       | CakSNP12771    | <i>Kabuli</i>    | Ca_Kabuli_Chr07              | 26070513                       | (G/T)       |
| 12772       | CakSNP12772    | <i>Kabuli</i>    | Ca_Kabuli_Chr07              | 26070515                       | (A/G)       |
| 12773       | CakSNP12773    | <i>Kabuli</i>    | Ca_Kabuli_Chr07              | 26094578                       | (T/C)       |
| 12774       | CakSNP12774    | <i>Kabuli</i>    | Ca_Kabuli_Chr07              | 26094572                       | (C/T)       |
| 12775       | CakSNP12775    | <i>Kabuli</i>    | Ca_Kabuli_Chr07              | 26094562                       | (G/T)       |
| 12776       | CakSNP12776    | <i>Kabuli</i>    | Ca_Kabuli_Chr07              | 26094567                       | (G/A)       |
| 12777       | CakSNP12777    | <i>Kabuli</i>    | Ca_Kabuli_Chr07              | 26094609                       | (C/T)       |
| 12778       | CakSNP12778    | <i>Kabuli</i>    | Ca_Kabuli_Chr07              | 26137315                       | (T/C)       |
| 12779       | CakSNP12779    | <i>Kabuli</i>    | Ca_Kabuli_Chr07              | 26146779                       | (C/T)       |
| 12780       | CakSNP12780    | <i>Kabuli</i>    | Ca_Kabuli_Chr07              | 26226146                       | (G/C)       |
| 12781       | CakSNP12781    | <i>Kabuli</i>    | Ca_Kabuli_Chr07              | 26487440                       | (A/C)       |
| 12782       | CakSNP12782    | <i>Kabuli</i>    | Ca_Kabuli_Chr07              | 26692131                       | (T/G)       |
| 12783       | CakSNP12783    | <i>Kabuli</i>    | Ca_Kabuli_Chr07              | 26692130                       | (C/T)       |
| 12784       | CakSNP12784    | <i>Kabuli</i>    | Ca_Kabuli_Chr07              | 26692128                       | (A/C)       |
| 12785       | CakSNP12785    | <i>Kabuli</i>    | Ca_Kabuli_Chr07              | 26692194                       | (C/A)       |
| 12786       | CakSNP12786    | <i>Kabuli</i>    | Ca_Kabuli_Chr07              | 26692195                       | (G/T)       |
| 12787       | CakSNP12787    | <i>Kabuli</i>    | Ca_Kabuli_Chr07              | 26694365                       | (G/A)       |
| 12788       | CakSNP12788    | <i>Kabuli</i>    | Ca_Kabuli_Chr07              | 26694440                       | (C/A)       |
| 12789       | CakSNP12789    | <i>Kabuli</i>    | Ca_Kabuli_Chr07              | 26694441                       | (G/A)       |
| 12790       | CakSNP12790    | <i>Kabuli</i>    | Ca_Kabuli_Chr07              | 26897878                       | (A/G)       |
| 12791       | CakSNP12791    | <i>Kabuli</i>    | Ca_Kabuli_Chr07              | 26897910                       | (A/G)       |
| 12792       | CakSNP12792    | <i>Kabuli</i>    | Ca_Kabuli_Chr07              | 26897920                       | (A/G)       |
| 12793       | CakSNP12793    | <i>Kabuli</i>    | Ca_Kabuli_Chr07              | 26897923                       | (G/A)       |
| 12794       | CakSNP12794    | <i>Kabuli</i>    | Ca_Kabuli_Chr07              | 26897929                       | (T/C)       |
| 12795       | CakSNP12795    | <i>Kabuli</i>    | Ca_Kabuli_Chr07              | 26897940                       | (A/G)       |
| 12796       | CakSNP12796    | <i>Kabuli</i>    | Ca_Kabuli_Chr07              | 26897948                       | (A/T)       |
| 12797       | CakSNP12797    | <i>Kabuli</i>    | Ca_Kabuli_Chr07              | 26940917                       | (G/A)       |
| 12798       | CakSNP12798    | <i>Kabuli</i>    | Ca_Kabuli_Chr07              | 26940967                       | (A/G)       |
| 12799       | CakSNP12799    | <i>Kabuli</i>    | Ca_Kabuli_Chr07              | 26940979                       | (A/G)       |
| 12800       | CakSNP12800    | <i>Kabuli</i>    | Ca_Kabuli_Chr07              | 26940985                       | (T/G)       |
| 12801       | CakSNP12801    | <i>Kabuli</i>    | Ca_Kabuli_Chr07              | 27050259                       | (C/G)       |
| 12802       | CakSNP12802    | <i>Kabuli</i>    | Ca_Kabuli_Chr07              | 27176481                       | (C/A)       |
| 12803       | CakSNP12803    | <i>Kabuli</i>    | Ca_Kabuli_Chr07              | 27210919                       | (C/T)       |
| 12804       | CakSNP12804    | <i>Kabuli</i>    | Ca_Kabuli_Chr07              | 27210881                       | (C/T)       |
| 12805       | CakSNP12805    | <i>Kabuli</i>    | Ca_Kabuli_Chr07              | 27210871                       | (C/A)       |

| <b>S.N.</b> | <b>SNP IDs</b> | <b>Cultivars</b> | <b>Chromosomes/scaffolds</b> | <b>Physical positions (bp)</b> | <b>SNPs</b> |
|-------------|----------------|------------------|------------------------------|--------------------------------|-------------|
| 12806       | CakSNP12806    | <i>Kabuli</i>    | Ca_Kabuli_Chr07              | 27210865                       | (T/C)       |
| 12807       | CakSNP12807    | <i>Kabuli</i>    | Ca_Kabuli_Chr07              | 27210858                       | (C/T)       |
| 12808       | CakSNP12808    | <i>Kabuli</i>    | Ca_Kabuli_Chr07              | 27210853                       | (A/G)       |
| 12809       | CakSNP12809    | <i>Kabuli</i>    | Ca_Kabuli_Chr07              | 27210848                       | (A/T)       |
| 12810       | CakSNP12810    | <i>Kabuli</i>    | Ca_Kabuli_Chr07              | 27210951                       | (T/C)       |
| 12811       | CakSNP12811    | <i>Kabuli</i>    | Ca_Kabuli_Chr07              | 27210945                       | (C/T)       |
| 12812       | CakSNP12812    | <i>Kabuli</i>    | Ca_Kabuli_Chr07              | 27210988                       | (C/T)       |
| 12813       | CakSNP12813    | <i>Kabuli</i>    | Ca_Kabuli_Chr07              | 27210989                       | (C/T)       |
| 12814       | CakSNP12814    | <i>Kabuli</i>    | Ca_Kabuli_Chr07              | 27210992                       | (C/A)       |
| 12815       | CakSNP12815    | <i>Kabuli</i>    | Ca_Kabuli_Chr07              | 27211004                       | (T/C)       |
| 12816       | CakSNP12816    | <i>Kabuli</i>    | Ca_Kabuli_Chr07              | 27211036                       | (G/A)       |
| 12817       | CakSNP12817    | <i>Kabuli</i>    | Ca_Kabuli_Chr07              | 27211051                       | (C/A)       |
| 12818       | CakSNP12818    | <i>Kabuli</i>    | Ca_Kabuli_Chr07              | 27211084                       | (G/T)       |
| 12819       | CakSNP12819    | <i>Kabuli</i>    | Ca_Kabuli_Chr07              | 27211073                       | (C/T)       |
| 12820       | CakSNP12820    | <i>Kabuli</i>    | Ca_Kabuli_Chr07              | 27211060                       | (C/T)       |
| 12821       | CakSNP12821    | <i>Kabuli</i>    | Ca_Kabuli_Chr07              | 27633960                       | (C/A)       |
| 12822       | CakSNP12822    | <i>Kabuli</i>    | Ca_Kabuli_Chr07              | 27735234                       | (A/G)       |
| 12823       | CakSNP12823    | <i>Kabuli</i>    | Ca_Kabuli_Chr07              | 27899782                       | (T/C)       |
| 12824       | CakSNP12824    | <i>Kabuli</i>    | Ca_Kabuli_Chr07              | 27899743                       | (G/A)       |
| 12825       | CakSNP12825    | <i>Kabuli</i>    | Ca_Kabuli_Chr07              | 27971186                       | (T/G)       |
| 12826       | CakSNP12826    | <i>Kabuli</i>    | Ca_Kabuli_Chr07              | 28676139                       | (T/C)       |
| 12827       | CakSNP12827    | <i>Kabuli</i>    | Ca_Kabuli_Chr07              | 28931212                       | (A/C)       |
| 12828       | CakSNP12828    | <i>Kabuli</i>    | Ca_Kabuli_Chr07              | 28931223                       | (C/A)       |
| 12829       | CakSNP12829    | <i>Kabuli</i>    | Ca_Kabuli_Chr07              | 29150927                       | (A/C)       |
| 12830       | CakSNP12830    | <i>Kabuli</i>    | Ca_Kabuli_Chr07              | 29153994                       | (T/C)       |
| 12831       | CakSNP12831    | <i>Kabuli</i>    | Ca_Kabuli_Chr07              | 29154220                       | (C/A)       |
| 12832       | CakSNP12832    | <i>Kabuli</i>    | Ca_Kabuli_Chr07              | 29157286                       | (A/G)       |
| 12833       | CakSNP12833    | <i>Kabuli</i>    | Ca_Kabuli_Chr07              | 29168982                       | (G/A)       |
| 12834       | CakSNP12834    | <i>Kabuli</i>    | Ca_Kabuli_Chr07              | 29168980                       | (C/T)       |
| 12835       | CakSNP12835    | <i>Kabuli</i>    | Ca_Kabuli_Chr07              | 29190659                       | (T/G)       |
| 12836       | CakSNP12836    | <i>Kabuli</i>    | Ca_Kabuli_Chr07              | 29225385                       | (T/G)       |
| 12837       | CakSNP12837    | <i>Kabuli</i>    | Ca_Kabuli_Chr07              | 29225351                       | (T/G)       |
| 12838       | CakSNP12838    | <i>Kabuli</i>    | Ca_Kabuli_Chr07              | 29225348                       | (G/C)       |
| 12839       | CakSNP12839    | <i>Kabuli</i>    | Ca_Kabuli_Chr07              | 29229965                       | (A/G)       |
| 12840       | CakSNP12840    | <i>Kabuli</i>    | Ca_Kabuli_Chr07              | 29313114                       | (G/T)       |
| 12841       | CakSNP12841    | <i>Kabuli</i>    | Ca_Kabuli_Chr07              | 29313080                       | (T/C)       |
| 12842       | CakSNP12842    | <i>Kabuli</i>    | Ca_Kabuli_Chr07              | 29313067                       | (G/T)       |
| 12843       | CakSNP12843    | <i>Kabuli</i>    | Ca_Kabuli_Chr07              | 29313059                       | (G/A)       |

| <b>S.N.</b> | <b>SNP IDs</b> | <b>Cultivars</b> | <b>Chromosomes/scaffolds</b> | <b>Physical positions (bp)</b> | <b>SNPs</b> |
|-------------|----------------|------------------|------------------------------|--------------------------------|-------------|
| 12844       | CakSNP12844    | <i>Kabuli</i>    | Ca_Kabuli_Chr07              | 29313058                       | (T/C)       |
| 12845       | CakSNP12845    | <i>Kabuli</i>    | Ca_Kabuli_Chr07              | 29313051                       | (T/C)       |
| 12846       | CakSNP12846    | <i>Kabuli</i>    | Ca_Kabuli_Chr07              | 29313257                       | (G/A)       |
| 12847       | CakSNP12847    | <i>Kabuli</i>    | Ca_Kabuli_Chr07              | 29434818                       | (T/C)       |
| 12848       | CakSNP12848    | <i>Kabuli</i>    | Ca_Kabuli_Chr07              | 29482556                       | (G/A)       |
| 12849       | CakSNP12849    | <i>Kabuli</i>    | Ca_Kabuli_Chr07              | 29484304                       | (G/A)       |
| 12850       | CakSNP12850    | <i>Kabuli</i>    | Ca_Kabuli_Chr07              | 29607943                       | (C/T)       |
| 12851       | CakSNP12851    | <i>Kabuli</i>    | Ca_Kabuli_Chr07              | 29613699                       | (C/T)       |
| 12852       | CakSNP12852    | <i>Kabuli</i>    | Ca_Kabuli_Chr07              | 29625884                       | (T/C)       |
| 12853       | CakSNP12853    | <i>Kabuli</i>    | Ca_Kabuli_Chr07              | 29705531                       | (T/G)       |
| 12854       | CakSNP12854    | <i>Kabuli</i>    | Ca_Kabuli_Chr07              | 29705499                       | (T/C)       |
| 12855       | CakSNP12855    | <i>Kabuli</i>    | Ca_Kabuli_Chr07              | 29796564                       | (G/T)       |
| 12856       | CakSNP12856    | <i>Kabuli</i>    | Ca_Kabuli_Chr07              | 29801148                       | (A/G)       |
| 12857       | CakSNP12857    | <i>Kabuli</i>    | Ca_Kabuli_Chr07              | 29801154                       | (T/C)       |
| 12858       | CakSNP12858    | <i>Kabuli</i>    | Ca_Kabuli_Chr07              | 29837035                       | (G/A)       |
| 12859       | CakSNP12859    | <i>Kabuli</i>    | Ca_Kabuli_Chr07              | 29838073                       | (C/T)       |
| 12860       | CakSNP12860    | <i>Kabuli</i>    | Ca_Kabuli_Chr07              | 29848248                       | (T/C)       |
| 12861       | CakSNP12861    | <i>Kabuli</i>    | Ca_Kabuli_Chr07              | 29848433                       | (C/T)       |
| 12862       | CakSNP12862    | <i>Kabuli</i>    | Ca_Kabuli_Chr07              | 29849509                       | (C/T)       |
| 12863       | CakSNP12863    | <i>Kabuli</i>    | Ca_Kabuli_Chr07              | 29849544                       | (A/G)       |
| 12864       | CakSNP12864    | <i>Kabuli</i>    | Ca_Kabuli_Chr07              | 29884719                       | (G/T)       |
| 12865       | CakSNP12865    | <i>Kabuli</i>    | Ca_Kabuli_Chr07              | 29884718                       | (C/A)       |
| 12866       | CakSNP12866    | <i>Kabuli</i>    | Ca_Kabuli_Chr07              | 29925008                       | (G/A)       |
| 12867       | CakSNP12867    | <i>Kabuli</i>    | Ca_Kabuli_Chr07              | 30004767                       | (C/T)       |
| 12868       | CakSNP12868    | <i>Kabuli</i>    | Ca_Kabuli_Chr07              | 30004934                       | (A/C)       |
| 12869       | CakSNP12869    | <i>Kabuli</i>    | Ca_Kabuli_Chr07              | 30026039                       | (T/G)       |
| 12870       | CakSNP12870    | <i>Kabuli</i>    | Ca_Kabuli_Chr07              | 30026017                       | (C/T)       |
| 12871       | CakSNP12871    | <i>Kabuli</i>    | Ca_Kabuli_Chr07              | 30029793                       | (A/C)       |
| 12872       | CakSNP12872    | <i>Kabuli</i>    | Ca_Kabuli_Chr07              | 30029820                       | (T/C)       |
| 12873       | CakSNP12873    | <i>Kabuli</i>    | Ca_Kabuli_Chr07              | 30060299                       | (C/A)       |
| 12874       | CakSNP12874    | <i>Kabuli</i>    | Ca_Kabuli_Chr07              | 30085847                       | (C/T)       |
| 12875       | CakSNP12875    | <i>Kabuli</i>    | Ca_Kabuli_Chr07              | 30085883                       | (T/G)       |
| 12876       | CakSNP12876    | <i>Kabuli</i>    | Ca_Kabuli_Chr07              | 30085906                       | (C/T)       |
| 12877       | CakSNP12877    | <i>Kabuli</i>    | Ca_Kabuli_Chr07              | 30085910                       | (T/A)       |
| 12878       | CakSNP12878    | <i>Kabuli</i>    | Ca_Kabuli_Chr07              | 30099003                       | (C/T)       |
| 12879       | CakSNP12879    | <i>Kabuli</i>    | Ca_Kabuli_Chr07              | 30107340                       | (A/G)       |
| 12880       | CakSNP12880    | <i>Kabuli</i>    | Ca_Kabuli_Chr07              | 30398855                       | (A/C)       |
| 12881       | CakSNP12881    | <i>Kabuli</i>    | Ca_Kabuli_Chr07              | 30403615                       | (A/G)       |

| <b>S.N.</b> | <b>SNP IDs</b> | <b>Cultivars</b> | <b>Chromosomes/scaffolds</b> | <b>Physical positions (bp)</b> | <b>SNPs</b> |
|-------------|----------------|------------------|------------------------------|--------------------------------|-------------|
| 12882       | CakSNP12882    | <i>Kabuli</i>    | Ca_Kabuli_Chr07              | 30403618                       | (G/A)       |
| 12883       | CakSNP12883    | <i>Kabuli</i>    | Ca_Kabuli_Chr07              | 30403700                       | (C/T)       |
| 12884       | CakSNP12884    | <i>Kabuli</i>    | Ca_Kabuli_Chr07              | 30403692                       | (G/A)       |
| 12885       | CakSNP12885    | <i>Kabuli</i>    | Ca_Kabuli_Chr07              | 30403621                       | (G/T)       |
| 12886       | CakSNP12886    | <i>Kabuli</i>    | Ca_Kabuli_Chr07              | 30691324                       | (A/C)       |
| 12887       | CakSNP12887    | <i>Kabuli</i>    | Ca_Kabuli_Chr07              | 30691318                       | (A/C)       |
| 12888       | CakSNP12888    | <i>Kabuli</i>    | Ca_Kabuli_Chr07              | 30768315                       | (G/A)       |
| 12889       | CakSNP12889    | <i>Kabuli</i>    | Ca_Kabuli_Chr07              | 30850950                       | (A/C)       |
| 12890       | CakSNP12890    | <i>Kabuli</i>    | Ca_Kabuli_Chr07              | 31190059                       | (G/A)       |
| 12891       | CakSNP12891    | <i>Kabuli</i>    | Ca_Kabuli_Chr07              | 31193786                       | (T/G)       |
| 12892       | CakSNP12892    | <i>Kabuli</i>    | Ca_Kabuli_Chr07              | 31314421                       | (T/A)       |
| 12893       | CakSNP12893    | <i>Kabuli</i>    | Ca_Kabuli_Chr07              | 31324279                       | (A/G)       |
| 12894       | CakSNP12894    | <i>Kabuli</i>    | Ca_Kabuli_Chr07              | 31401807                       | (T/C)       |
| 12895       | CakSNP12895    | <i>Kabuli</i>    | Ca_Kabuli_Chr07              | 31442425                       | (A/C)       |
| 12896       | CakSNP12896    | <i>Kabuli</i>    | Ca_Kabuli_Chr07              | 31612697                       | (T/A)       |
| 12897       | CakSNP12897    | <i>Kabuli</i>    | Ca_Kabuli_Chr07              | 31639701                       | (C/T)       |
| 12898       | CakSNP12898    | <i>Kabuli</i>    | Ca_Kabuli_Chr07              | 31830238                       | (A/G)       |
| 12899       | CakSNP12899    | <i>Kabuli</i>    | Ca_Kabuli_Chr07              | 31851096                       | (T/A)       |
| 12900       | CakSNP12900    | <i>Kabuli</i>    | Ca_Kabuli_Chr07              | 31873079                       | (G/T)       |
| 12901       | CakSNP12901    | <i>Kabuli</i>    | Ca_Kabuli_Chr07              | 31996345                       | (A/C)       |
| 12902       | CakSNP12902    | <i>Kabuli</i>    | Ca_Kabuli_Chr07              | 32017294                       | (G/A)       |
| 12903       | CakSNP12903    | <i>Kabuli</i>    | Ca_Kabuli_Chr07              | 32017288                       | (G/T)       |
| 12904       | CakSNP12904    | <i>Kabuli</i>    | Ca_Kabuli_Chr07              | 32017286                       | (T/G)       |
| 12905       | CakSNP12905    | <i>Kabuli</i>    | Ca_Kabuli_Chr07              | 32017284                       | (C/T)       |
| 12906       | CakSNP12906    | <i>Kabuli</i>    | Ca_Kabuli_Chr07              | 32017253                       | (G/A)       |
| 12907       | CakSNP12907    | <i>Kabuli</i>    | Ca_Kabuli_Chr07              | 32017252                       | (G/A)       |
| 12908       | CakSNP12908    | <i>Kabuli</i>    | Ca_Kabuli_Chr07              | 32017238                       | (C/T)       |
| 12909       | CakSNP12909    | <i>Kabuli</i>    | Ca_Kabuli_Chr07              | 32017228                       | (G/A)       |
| 12910       | CakSNP12910    | <i>Kabuli</i>    | Ca_Kabuli_Chr07              | 32017221                       | (C/T)       |
| 12911       | CakSNP12911    | <i>Kabuli</i>    | Ca_Kabuli_Chr07              | 32017211                       | (C/A)       |
| 12912       | CakSNP12912    | <i>Kabuli</i>    | Ca_Kabuli_Chr07              | 32127288                       | (T/A)       |
| 12913       | CakSNP12913    | <i>Kabuli</i>    | Ca_Kabuli_Chr07              | 32283585                       | (T/G)       |
| 12914       | CakSNP12914    | <i>Kabuli</i>    | Ca_Kabuli_Chr07              | 32309397                       | (A/T)       |
| 12915       | CakSNP12915    | <i>Kabuli</i>    | Ca_Kabuli_Chr07              | 32309411                       | (G/T)       |
| 12916       | CakSNP12916    | <i>Kabuli</i>    | Ca_Kabuli_Chr07              | 32309415                       | (C/T)       |
| 12917       | CakSNP12917    | <i>Kabuli</i>    | Ca_Kabuli_Chr07              | 32309429                       | (C/T)       |
| 12918       | CakSNP12918    | <i>Kabuli</i>    | Ca_Kabuli_Chr07              | 32309377                       | (C/T)       |
| 12919       | CakSNP12919    | <i>Kabuli</i>    | Ca_Kabuli_Chr07              | 32309376                       | (C/G)       |

| <b>S.N.</b> | <b>SNP IDs</b> | <b>Cultivars</b> | <b>Chromosomes/scaffolds</b> | <b>Physical positions (bp)</b> | <b>SNPs</b> |
|-------------|----------------|------------------|------------------------------|--------------------------------|-------------|
| 12920       | CakSNP12920    | <i>Kabuli</i>    | Ca_Kabuli_Chr07              | 32399759                       | (C/T)       |
| 12921       | CakSNP12921    | <i>Kabuli</i>    | Ca_Kabuli_Chr07              | 32404932                       | (T/C)       |
| 12922       | CakSNP12922    | <i>Kabuli</i>    | Ca_Kabuli_Chr07              | 32451377                       | (A/C)       |
| 12923       | CakSNP12923    | <i>Kabuli</i>    | Ca_Kabuli_Chr07              | 32522201                       | (A/G)       |
| 12924       | CakSNP12924    | <i>Kabuli</i>    | Ca_Kabuli_Chr07              | 32522203                       | (A/G)       |
| 12925       | CakSNP12925    | <i>Kabuli</i>    | Ca_Kabuli_Chr07              | 32522207                       | (T/G)       |
| 12926       | CakSNP12926    | <i>Kabuli</i>    | Ca_Kabuli_Chr07              | 32522213                       | (A/G)       |
| 12927       | CakSNP12927    | <i>Kabuli</i>    | Ca_Kabuli_Chr07              | 32522230                       | (T/G)       |
| 12928       | CakSNP12928    | <i>Kabuli</i>    | Ca_Kabuli_Chr07              | 32557599                       | (G/A)       |
| 12929       | CakSNP12929    | <i>Kabuli</i>    | Ca_Kabuli_Chr07              | 32669570                       | (A/G)       |
| 12930       | CakSNP12930    | <i>Kabuli</i>    | Ca_Kabuli_Chr07              | 32754633                       | (T/G)       |
| 12931       | CakSNP12931    | <i>Kabuli</i>    | Ca_Kabuli_Chr07              | 32755647                       | (A/C)       |
| 12932       | CakSNP12932    | <i>Kabuli</i>    | Ca_Kabuli_Chr07              | 32755662                       | (G/T)       |
| 12933       | CakSNP12933    | <i>Kabuli</i>    | Ca_Kabuli_Chr07              | 32784903                       | (T/G)       |
| 12934       | CakSNP12934    | <i>Kabuli</i>    | Ca_Kabuli_Chr07              | 32799037                       | (A/G)       |
| 12935       | CakSNP12935    | <i>Kabuli</i>    | Ca_Kabuli_Chr07              | 32807457                       | (T/A)       |
| 12936       | CakSNP12936    | <i>Kabuli</i>    | Ca_Kabuli_Chr07              | 32807499                       | (A/G)       |
| 12937       | CakSNP12937    | <i>Kabuli</i>    | Ca_Kabuli_Chr07              | 32874847                       | (C/T)       |
| 12938       | CakSNP12938    | <i>Kabuli</i>    | Ca_Kabuli_Chr07              | 32874840                       | (C/T)       |
| 12939       | CakSNP12939    | <i>Kabuli</i>    | Ca_Kabuli_Chr07              | 32875799                       | (T/A)       |
| 12940       | CakSNP12940    | <i>Kabuli</i>    | Ca_Kabuli_Chr07              | 32942199                       | (A/G)       |
| 12941       | CakSNP12941    | <i>Kabuli</i>    | Ca_Kabuli_Chr07              | 32942951                       | (T/G)       |
| 12942       | CakSNP12942    | <i>Kabuli</i>    | Ca_Kabuli_Chr07              | 32989796                       | (T/A)       |
| 12943       | CakSNP12943    | <i>Kabuli</i>    | Ca_Kabuli_Chr07              | 32989838                       | (C/T)       |
| 12944       | CakSNP12944    | <i>Kabuli</i>    | Ca_Kabuli_Chr07              | 32989903                       | (A/G)       |
| 12945       | CakSNP12945    | <i>Kabuli</i>    | Ca_Kabuli_Chr07              | 32989902                       | (C/A)       |
| 12946       | CakSNP12946    | <i>Kabuli</i>    | Ca_Kabuli_Chr07              | 33065611                       | (G/T)       |
| 12947       | CakSNP12947    | <i>Kabuli</i>    | Ca_Kabuli_Chr07              | 33121674                       | (G/C)       |
| 12948       | CakSNP12948    | <i>Kabuli</i>    | Ca_Kabuli_Chr07              | 33121640                       | (C/A)       |
| 12949       | CakSNP12949    | <i>Kabuli</i>    | Ca_Kabuli_Chr07              | 33122473                       | (A/C)       |
| 12950       | CakSNP12950    | <i>Kabuli</i>    | Ca_Kabuli_Chr07              | 33182932                       | (G/A)       |
| 12951       | CakSNP12951    | <i>Kabuli</i>    | Ca_Kabuli_Chr07              | 33267485                       | (T/C)       |
| 12952       | CakSNP12952    | <i>Kabuli</i>    | Ca_Kabuli_Chr07              | 33267496                       | (T/A)       |
| 12953       | CakSNP12953    | <i>Kabuli</i>    | Ca_Kabuli_Chr07              | 33335978                       | (C/A)       |
| 12954       | CakSNP12954    | <i>Kabuli</i>    | Ca_Kabuli_Chr07              | 33364329                       | (C/T)       |
| 12955       | CakSNP12955    | <i>Kabuli</i>    | Ca_Kabuli_Chr07              | 33364354                       | (G/A)       |
| 12956       | CakSNP12956    | <i>Kabuli</i>    | Ca_Kabuli_Chr07              | 33378427                       | (C/T)       |
| 12957       | CakSNP12957    | <i>Kabuli</i>    | Ca_Kabuli_Chr07              | 33411746                       | (C/A)       |

| <b>S.N.</b> | <b>SNP IDs</b> | <b>Cultivars</b> | <b>Chromosomes/scaffolds</b> | <b>Physical positions (bp)</b> | <b>SNPs</b> |
|-------------|----------------|------------------|------------------------------|--------------------------------|-------------|
| 12958       | CakSNP12958    | <i>Kabuli</i>    | Ca_Kabuli_Chr07              | 33465828                       | (C/A)       |
| 12959       | CakSNP12959    | <i>Kabuli</i>    | Ca_Kabuli_Chr07              | 33465818                       | (G/A)       |
| 12960       | CakSNP12960    | <i>Kabuli</i>    | Ca_Kabuli_Chr07              | 33465805                       | (T/C)       |
| 12961       | CakSNP12961    | <i>Kabuli</i>    | Ca_Kabuli_Chr07              | 33465802                       | (C/A)       |
| 12962       | CakSNP12962    | <i>Kabuli</i>    | Ca_Kabuli_Chr07              | 33465800                       | (T/A)       |
| 12963       | CakSNP12963    | <i>Kabuli</i>    | Ca_Kabuli_Chr07              | 33465781                       | (G/T)       |
| 12964       | CakSNP12964    | <i>Kabuli</i>    | Ca_Kabuli_Chr07              | 33465855                       | (A/C)       |
| 12965       | CakSNP12965    | <i>Kabuli</i>    | Ca_Kabuli_Chr07              | 33480940                       | (C/T)       |
| 12966       | CakSNP12966    | <i>Kabuli</i>    | Ca_Kabuli_Chr07              | 33573605                       | (C/T)       |
| 12967       | CakSNP12967    | <i>Kabuli</i>    | Ca_Kabuli_Chr07              | 33573655                       | (A/C)       |
| 12968       | CakSNP12968    | <i>Kabuli</i>    | Ca_Kabuli_Chr07              | 33619268                       | (G/C)       |
| 12969       | CakSNP12969    | <i>Kabuli</i>    | Ca_Kabuli_Chr07              | 33641799                       | (G/T)       |
| 12970       | CakSNP12970    | <i>Kabuli</i>    | Ca_Kabuli_Chr07              | 33641882                       | (A/T)       |
| 12971       | CakSNP12971    | <i>Kabuli</i>    | Ca_Kabuli_Chr07              | 33674454                       | (T/C)       |
| 12972       | CakSNP12972    | <i>Kabuli</i>    | Ca_Kabuli_Chr07              | 33744521                       | (C/G)       |
| 12973       | CakSNP12973    | <i>Kabuli</i>    | Ca_Kabuli_Chr07              | 33753917                       | (G/A)       |
| 12974       | CakSNP12974    | <i>Kabuli</i>    | Ca_Kabuli_Chr07              | 33761944                       | (G/A)       |
| 12975       | CakSNP12975    | <i>Kabuli</i>    | Ca_Kabuli_Chr07              | 33762053                       | (T/G)       |
| 12976       | CakSNP12976    | <i>Kabuli</i>    | Ca_Kabuli_Chr07              | 33821658                       | (C/T)       |
| 12977       | CakSNP12977    | <i>Kabuli</i>    | Ca_Kabuli_Chr07              | 33865463                       | (T/C)       |
| 12978       | CakSNP12978    | <i>Kabuli</i>    | Ca_Kabuli_Chr07              | 33865475                       | (G/A)       |
| 12979       | CakSNP12979    | <i>Kabuli</i>    | Ca_Kabuli_Chr07              | 33867334                       | (C/T)       |
| 12980       | CakSNP12980    | <i>Kabuli</i>    | Ca_Kabuli_Chr07              | 33867491                       | (C/T)       |
| 12981       | CakSNP12981    | <i>Kabuli</i>    | Ca_Kabuli_Chr07              | 33867674                       | (C/T)       |
| 12982       | CakSNP12982    | <i>Kabuli</i>    | Ca_Kabuli_Chr07              | 33869367                       | (G/A)       |
| 12983       | CakSNP12983    | <i>Kabuli</i>    | Ca_Kabuli_Chr07              | 33879559                       | (C/G)       |
| 12984       | CakSNP12984    | <i>Kabuli</i>    | Ca_Kabuli_Chr07              | 33910324                       | (C/A)       |
| 12985       | CakSNP12985    | <i>Kabuli</i>    | Ca_Kabuli_Chr07              | 33910870                       | (C/A)       |
| 12986       | CakSNP12986    | <i>Kabuli</i>    | Ca_Kabuli_Chr07              | 33912719                       | (T/G)       |
| 12987       | CakSNP12987    | <i>Kabuli</i>    | Ca_Kabuli_Chr07              | 33912766                       | (G/T)       |
| 12988       | CakSNP12988    | <i>Kabuli</i>    | Ca_Kabuli_Chr07              | 33912866                       | (T/C)       |
| 12989       | CakSNP12989    | <i>Kabuli</i>    | Ca_Kabuli_Chr07              | 33912899                       | (T/A)       |
| 12990       | CakSNP12990    | <i>Kabuli</i>    | Ca_Kabuli_Chr07              | 33912902                       | (A/T)       |
| 12991       | CakSNP12991    | <i>Kabuli</i>    | Ca_Kabuli_Chr07              | 33912913                       | (A/T)       |
| 12992       | CakSNP12992    | <i>Kabuli</i>    | Ca_Kabuli_Chr07              | 33912916                       | (G/T)       |
| 12993       | CakSNP12993    | <i>Kabuli</i>    | Ca_Kabuli_Chr07              | 33912921                       | (T/G)       |
| 12994       | CakSNP12994    | <i>Kabuli</i>    | Ca_Kabuli_Chr07              | 33912950                       | (C/T)       |
| 12995       | CakSNP12995    | <i>Kabuli</i>    | Ca_Kabuli_Chr07              | 33912966                       | (T/C)       |



| <b>S.N.</b> | <b>SNP IDs</b> | <b>Cultivars</b> | <b>Chromosomes/scaffolds</b> | <b>Physical positions (bp)</b> | <b>SNPs</b> |
|-------------|----------------|------------------|------------------------------|--------------------------------|-------------|
| 12996       | CakSNP12996    | <i>Kabuli</i>    | Ca_Kabuli_Chr07              | 33913094                       | (A/G)       |
| 12997       | CakSNP12997    | <i>Kabuli</i>    | Ca_Kabuli_Chr07              | 33913047                       | (C/T)       |
| 12998       | CakSNP12998    | <i>Kabuli</i>    | Ca_Kabuli_Chr07              | 33913045                       | (G/T)       |
| 12999       | CakSNP12999    | <i>Kabuli</i>    | Ca_Kabuli_Chr07              | 34107603                       | (C/A)       |
| 13000       | CakSNP13000    | <i>Kabuli</i>    | Ca_Kabuli_Chr07              | 34152124                       | (G/C)       |
| 13001       | CakSNP13001    | <i>Kabuli</i>    | Ca_Kabuli_Chr07              | 34271486                       | (A/G)       |
| 13002       | CakSNP13002    | <i>Kabuli</i>    | Ca_Kabuli_Chr07              | 34277014                       | (G/T)       |
| 13003       | CakSNP13003    | <i>Kabuli</i>    | Ca_Kabuli_Chr07              | 34277010                       | (A/G)       |
| 13004       | CakSNP13004    | <i>Kabuli</i>    | Ca_Kabuli_Chr07              | 34279673                       | (G/A)       |
| 13005       | CakSNP13005    | <i>Kabuli</i>    | Ca_Kabuli_Chr07              | 34279725                       | (A/G)       |
| 13006       | CakSNP13006    | <i>Kabuli</i>    | Ca_Kabuli_Chr07              | 34279715                       | (A/C)       |
| 13007       | CakSNP13007    | <i>Kabuli</i>    | Ca_Kabuli_Chr07              | 34318860                       | (C/T)       |
| 13008       | CakSNP13008    | <i>Kabuli</i>    | Ca_Kabuli_Chr07              | 34318862                       | (A/G)       |
| 13009       | CakSNP13009    | <i>Kabuli</i>    | Ca_Kabuli_Chr07              | 34474614                       | (A/C)       |
| 13010       | CakSNP13010    | <i>Kabuli</i>    | Ca_Kabuli_Chr07              | 34801839                       | (A/T)       |
| 13011       | CakSNP13011    | <i>Kabuli</i>    | Ca_Kabuli_Chr07              | 34857693                       | (C/T)       |
| 13012       | CakSNP13012    | <i>Kabuli</i>    | Ca_Kabuli_Chr07              | 34947743                       | (A/C)       |
| 13013       | CakSNP13013    | <i>Kabuli</i>    | Ca_Kabuli_Chr07              | 35016516                       | (G/C)       |
| 13014       | CakSNP13014    | <i>Kabuli</i>    | Ca_Kabuli_Chr07              | 35072425                       | (A/T)       |
| 13015       | CakSNP13015    | <i>Kabuli</i>    | Ca_Kabuli_Chr07              | 35072407                       | (G/A)       |
| 13016       | CakSNP13016    | <i>Kabuli</i>    | Ca_Kabuli_Chr07              | 35072461                       | (A/T)       |
| 13017       | CakSNP13017    | <i>Kabuli</i>    | Ca_Kabuli_Chr07              | 35074345                       | (T/A)       |
| 13018       | CakSNP13018    | <i>Kabuli</i>    | Ca_Kabuli_Chr07              | 35074348                       | (T/C)       |
| 13019       | CakSNP13019    | <i>Kabuli</i>    | Ca_Kabuli_Chr07              | 35074362                       | (T/C)       |
| 13020       | CakSNP13020    | <i>Kabuli</i>    | Ca_Kabuli_Chr07              | 35112785                       | (T/C)       |
| 13021       | CakSNP13021    | <i>Kabuli</i>    | Ca_Kabuli_Chr07              | 35114049                       | (C/T)       |
| 13022       | CakSNP13022    | <i>Kabuli</i>    | Ca_Kabuli_Chr07              | 35134809                       | (A/C)       |
| 13023       | CakSNP13023    | <i>Kabuli</i>    | Ca_Kabuli_Chr07              | 35134863                       | (T/C)       |
| 13024       | CakSNP13024    | <i>Kabuli</i>    | Ca_Kabuli_Chr07              | 35181619                       | (T/G)       |
| 13025       | CakSNP13025    | <i>Kabuli</i>    | Ca_Kabuli_Chr07              | 35181661                       | (T/C)       |
| 13026       | CakSNP13026    | <i>Kabuli</i>    | Ca_Kabuli_Chr07              | 35181660                       | (G/A)       |
| 13027       | CakSNP13027    | <i>Kabuli</i>    | Ca_Kabuli_Chr07              | 35181635                       | (G/C)       |
| 13028       | CakSNP13028    | <i>Kabuli</i>    | Ca_Kabuli_Chr07              | 35227794                       | (A/C)       |
| 13029       | CakSNP13029    | <i>Kabuli</i>    | Ca_Kabuli_Chr07              | 35258029                       | (T/G)       |
| 13030       | CakSNP13030    | <i>Kabuli</i>    | Ca_Kabuli_Chr07              | 35263711                       | (A/T)       |
| 13031       | CakSNP13031    | <i>Kabuli</i>    | Ca_Kabuli_Chr07              | 35263712                       | (G/T)       |
| 13032       | CakSNP13032    | <i>Kabuli</i>    | Ca_Kabuli_Chr07              | 35263736                       | (C/G)       |
| 13033       | CakSNP13033    | <i>Kabuli</i>    | Ca_Kabuli_Chr07              | 35263758                       | (A/G)       |

| <b>S.N.</b> | <b>SNP IDs</b> | <b>Cultivars</b> | <b>Chromosomes/scaffolds</b> | <b>Physical positions (bp)</b> | <b>SNPs</b> |
|-------------|----------------|------------------|------------------------------|--------------------------------|-------------|
| 13034       | CakSNP13034    | <i>Kabuli</i>    | Ca_Kabuli_Chr07              | 35274368                       | (A/G)       |
| 13035       | CakSNP13035    | <i>Kabuli</i>    | Ca_Kabuli_Chr07              | 35274859                       | (T/G)       |
| 13036       | CakSNP13036    | <i>Kabuli</i>    | Ca_Kabuli_Chr07              | 35274858                       | (G/A)       |
| 13037       | CakSNP13037    | <i>Kabuli</i>    | Ca_Kabuli_Chr07              | 35274828                       | (A/G)       |
| 13038       | CakSNP13038    | <i>Kabuli</i>    | Ca_Kabuli_Chr07              | 35279675                       | (A/G)       |
| 13039       | CakSNP13039    | <i>Kabuli</i>    | Ca_Kabuli_Chr07              | 35280189                       | (G/A)       |
| 13040       | CakSNP13040    | <i>Kabuli</i>    | Ca_Kabuli_Chr07              | 35280167                       | (A/G)       |
| 13041       | CakSNP13041    | <i>Kabuli</i>    | Ca_Kabuli_Chr07              | 35576427                       | (C/A)       |
| 13042       | CakSNP13042    | <i>Kabuli</i>    | Ca_Kabuli_Chr07              | 35619530                       | (G/A)       |
| 13043       | CakSNP13043    | <i>Kabuli</i>    | Ca_Kabuli_Chr07              | 35619487                       | (G/A)       |
| 13044       | CakSNP13044    | <i>Kabuli</i>    | Ca_Kabuli_Chr07              | 35619518                       | (G/C)       |
| 13045       | CakSNP13045    | <i>Kabuli</i>    | Ca_Kabuli_Chr07              | 35622168                       | (A/G)       |
| 13046       | CakSNP13046    | <i>Kabuli</i>    | Ca_Kabuli_Chr07              | 35637056                       | (T/C)       |
| 13047       | CakSNP13047    | <i>Kabuli</i>    | Ca_Kabuli_Chr07              | 35680423                       | (A/C)       |
| 13048       | CakSNP13048    | <i>Kabuli</i>    | Ca_Kabuli_Chr07              | 35799096                       | (A/C)       |
| 13049       | CakSNP13049    | <i>Kabuli</i>    | Ca_Kabuli_Chr07              | 35799083                       | (T/A)       |
| 13050       | CakSNP13050    | <i>Kabuli</i>    | Ca_Kabuli_Chr07              | 35799074                       | (G/C)       |
| 13051       | CakSNP13051    | <i>Kabuli</i>    | Ca_Kabuli_Chr07              | 35799073                       | (T/C)       |
| 13052       | CakSNP13052    | <i>Kabuli</i>    | Ca_Kabuli_Chr07              | 35807000                       | (A/G)       |
| 13053       | CakSNP13053    | <i>Kabuli</i>    | Ca_Kabuli_Chr07              | 35806999                       | (C/G)       |
| 13054       | CakSNP13054    | <i>Kabuli</i>    | Ca_Kabuli_Chr07              | 35806990                       | (A/T)       |
| 13055       | CakSNP13055    | <i>Kabuli</i>    | Ca_Kabuli_Chr07              | 35806977                       | (T/G)       |
| 13056       | CakSNP13056    | <i>Kabuli</i>    | Ca_Kabuli_Chr07              | 35911620                       | (T/G)       |
| 13057       | CakSNP13057    | <i>Kabuli</i>    | Ca_Kabuli_Chr07              | 35911617                       | (A/C)       |
| 13058       | CakSNP13058    | <i>Kabuli</i>    | Ca_Kabuli_Chr07              | 35911615                       | (C/T)       |
| 13059       | CakSNP13059    | <i>Kabuli</i>    | Ca_Kabuli_Chr07              | 35911612                       | (T/G)       |
| 13060       | CakSNP13060    | <i>Kabuli</i>    | Ca_Kabuli_Chr07              | 35911606                       | (T/C)       |
| 13061       | CakSNP13061    | <i>Kabuli</i>    | Ca_Kabuli_Chr07              | 35947529                       | (T/C)       |
| 13062       | CakSNP13062    | <i>Kabuli</i>    | Ca_Kabuli_Chr07              | 35947550                       | (C/T)       |
| 13063       | CakSNP13063    | <i>Kabuli</i>    | Ca_Kabuli_Chr07              | 35947551                       | (A/G)       |
| 13064       | CakSNP13064    | <i>Kabuli</i>    | Ca_Kabuli_Chr07              | 35959805                       | (C/T)       |
| 13065       | CakSNP13065    | <i>Kabuli</i>    | Ca_Kabuli_Chr07              | 35959825                       | (G/A)       |
| 13066       | CakSNP13066    | <i>Kabuli</i>    | Ca_Kabuli_Chr07              | 35959878                       | (G/A)       |
| 13067       | CakSNP13067    | <i>Kabuli</i>    | Ca_Kabuli_Chr07              | 35959917                       | (C/T)       |
| 13068       | CakSNP13068    | <i>Kabuli</i>    | Ca_Kabuli_Chr07              | 35959865                       | (T/C)       |
| 13069       | CakSNP13069    | <i>Kabuli</i>    | Ca_Kabuli_Chr07              | 36711954                       | (C/A)       |
| 13070       | CakSNP13070    | <i>Kabuli</i>    | Ca_Kabuli_Chr07              | 36715249                       | (T/C)       |
| 13071       | CakSNP13071    | <i>Kabuli</i>    | Ca_Kabuli_Chr07              | 36745439                       | (T/G)       |

| <b>S.N.</b> | <b>SNP IDs</b> | <b>Cultivars</b> | <b>Chromosomes/scaffolds</b> | <b>Physical positions (bp)</b> | <b>SNPs</b> |
|-------------|----------------|------------------|------------------------------|--------------------------------|-------------|
| 13072       | CakSNP13072    | <i>Kabuli</i>    | Ca_Kabuli_Chr07              | 36916272                       | (T/G)       |
| 13073       | CakSNP13073    | <i>Kabuli</i>    | Ca_Kabuli_Chr07              | 36916273                       | (T/A)       |
| 13074       | CakSNP13074    | <i>Kabuli</i>    | Ca_Kabuli_Chr07              | 36998096                       | (T/C)       |
| 13075       | CakSNP13075    | <i>Kabuli</i>    | Ca_Kabuli_Chr07              | 36998113                       | (C/T)       |
| 13076       | CakSNP13076    | <i>Kabuli</i>    | Ca_Kabuli_Chr07              | 37058979                       | (C/T)       |
| 13077       | CakSNP13077    | <i>Kabuli</i>    | Ca_Kabuli_Chr07              | 37187439                       | (A/G)       |
| 13078       | CakSNP13078    | <i>Kabuli</i>    | Ca_Kabuli_Chr07              | 37626729                       | (G/T)       |
| 13079       | CakSNP13079    | <i>Kabuli</i>    | Ca_Kabuli_Chr07              | 37626653                       | (A/C)       |
| 13080       | CakSNP13080    | <i>Kabuli</i>    | Ca_Kabuli_Chr07              | 37626687                       | (A/G)       |
| 13081       | CakSNP13081    | <i>Kabuli</i>    | Ca_Kabuli_Chr07              | 37626666                       | (C/T)       |
| 13082       | CakSNP13082    | <i>Kabuli</i>    | Ca_Kabuli_Chr07              | 37703967                       | (G/A)       |
| 13083       | CakSNP13083    | <i>Kabuli</i>    | Ca_Kabuli_Chr07              | 37703966                       | (C/T)       |
| 13084       | CakSNP13084    | <i>Kabuli</i>    | Ca_Kabuli_Chr07              | 37703965                       | (C/T)       |
| 13085       | CakSNP13085    | <i>Kabuli</i>    | Ca_Kabuli_Chr07              | 37703921                       | (G/T)       |
| 13086       | CakSNP13086    | <i>Kabuli</i>    | Ca_Kabuli_Chr07              | 37703912                       | (G/A)       |
| 13087       | CakSNP13087    | <i>Kabuli</i>    | Ca_Kabuli_Chr07              | 37703913                       | (C/G)       |
| 13088       | CakSNP13088    | <i>Kabuli</i>    | Ca_Kabuli_Chr07              | 37703936                       | (C/T)       |
| 13089       | CakSNP13089    | <i>Kabuli</i>    | Ca_Kabuli_Chr07              | 37857936                       | (G/T)       |
| 13090       | CakSNP13090    | <i>Kabuli</i>    | Ca_Kabuli_Chr07              | 37857928                       | (A/T)       |
| 13091       | CakSNP13091    | <i>Kabuli</i>    | Ca_Kabuli_Chr07              | 37857917                       | (G/A)       |
| 13092       | CakSNP13092    | <i>Kabuli</i>    | Ca_Kabuli_Chr07              | 37857885                       | (C/T)       |
| 13093       | CakSNP13093    | <i>Kabuli</i>    | Ca_Kabuli_Chr07              | 38047374                       | (A/G)       |
| 13094       | CakSNP13094    | <i>Kabuli</i>    | Ca_Kabuli_Chr07              | 38047378                       | (C/A)       |
| 13095       | CakSNP13095    | <i>Kabuli</i>    | Ca_Kabuli_Chr07              | 38143361                       | (A/G)       |
| 13096       | CakSNP13096    | <i>Kabuli</i>    | Ca_Kabuli_Chr07              | 38143524                       | (T/A)       |
| 13097       | CakSNP13097    | <i>Kabuli</i>    | Ca_Kabuli_Chr07              | 38143452                       | (G/A)       |
| 13098       | CakSNP13098    | <i>Kabuli</i>    | Ca_Kabuli_Chr07              | 38460464                       | (G/A)       |
| 13099       | CakSNP13099    | <i>Kabuli</i>    | Ca_Kabuli_Chr07              | 38460452                       | (C/T)       |
| 13100       | CakSNP13100    | <i>Kabuli</i>    | Ca_Kabuli_Chr07              | 38460425                       | (G/A)       |
| 13101       | CakSNP13101    | <i>Kabuli</i>    | Ca_Kabuli_Chr07              | 38460394                       | (C/A)       |
| 13102       | CakSNP13102    | <i>Kabuli</i>    | Ca_Kabuli_Chr07              | 39181880                       | (G/A)       |
| 13103       | CakSNP13103    | <i>Kabuli</i>    | Ca_Kabuli_Chr07              | 39182564                       | (A/T)       |
| 13104       | CakSNP13104    | <i>Kabuli</i>    | Ca_Kabuli_Chr07              | 39339510                       | (T/G)       |
| 13105       | CakSNP13105    | <i>Kabuli</i>    | Ca_Kabuli_Chr07              | 39339509                       | (G/A)       |
| 13106       | CakSNP13106    | <i>Kabuli</i>    | Ca_Kabuli_Chr07              | 39339508                       | (G/A)       |
| 13107       | CakSNP13107    | <i>Kabuli</i>    | Ca_Kabuli_Chr07              | 39339503                       | (C/A)       |
| 13108       | CakSNP13108    | <i>Kabuli</i>    | Ca_Kabuli_Chr07              | 39339502                       | (C/A)       |
| 13109       | CakSNP13109    | <i>Kabuli</i>    | Ca_Kabuli_Chr07              | 39339501                       | (G/C)       |

| <b>S.N.</b> | <b>SNP IDs</b> | <b>Cultivars</b> | <b>Chromosomes/scaffolds</b> | <b>Physical positions (bp)</b> | <b>SNPs</b> |
|-------------|----------------|------------------|------------------------------|--------------------------------|-------------|
| 13110       | CakSNP13110    | <i>Kabuli</i>    | Ca_Kabuli_Chr07              | 39339500                       | (G/T)       |
| 13111       | CakSNP13111    | <i>Kabuli</i>    | Ca_Kabuli_Chr07              | 39339499                       | (C/T)       |
| 13112       | CakSNP13112    | <i>Kabuli</i>    | Ca_Kabuli_Chr07              | 39339498                       | (G/T)       |
| 13113       | CakSNP13113    | <i>Kabuli</i>    | Ca_Kabuli_Chr07              | 39339495                       | (G/T)       |
| 13114       | CakSNP13114    | <i>Kabuli</i>    | Ca_Kabuli_Chr07              | 39399280                       | (T/C)       |
| 13115       | CakSNP13115    | <i>Kabuli</i>    | Ca_Kabuli_Chr07              | 39680221                       | (A/C)       |
| 13116       | CakSNP13116    | <i>Kabuli</i>    | Ca_Kabuli_Chr07              | 39680222                       | (G/A)       |
| 13117       | CakSNP13117    | <i>Kabuli</i>    | Ca_Kabuli_Chr07              | 39768248                       | (T/C)       |
| 13118       | CakSNP13118    | <i>Kabuli</i>    | Ca_Kabuli_Chr07              | 39944444                       | (T/C)       |
| 13119       | CakSNP13119    | <i>Kabuli</i>    | Ca_Kabuli_Chr07              | 39944937                       | (T/C)       |
| 13120       | CakSNP13120    | <i>Kabuli</i>    | Ca_Kabuli_Chr07              | 39944889                       | (T/C)       |
| 13121       | CakSNP13121    | <i>Kabuli</i>    | Ca_Kabuli_Chr07              | 40092198                       | (G/A)       |
| 13122       | CakSNP13122    | <i>Kabuli</i>    | Ca_Kabuli_Chr07              | 40092181                       | (C/T)       |
| 13123       | CakSNP13123    | <i>Kabuli</i>    | Ca_Kabuli_Chr07              | 40092218                       | (A/T)       |
| 13124       | CakSNP13124    | <i>Kabuli</i>    | Ca_Kabuli_Chr07              | 40092213                       | (G/A)       |
| 13125       | CakSNP13125    | <i>Kabuli</i>    | Ca_Kabuli_Chr07              | 40092163                       | (T/C)       |
| 13126       | CakSNP13126    | <i>Kabuli</i>    | Ca_Kabuli_Chr07              | 40092155                       | (T/A)       |
| 13127       | CakSNP13127    | <i>Kabuli</i>    | Ca_Kabuli_Chr07              | 40092156                       | (C/A)       |
| 13128       | CakSNP13128    | <i>Kabuli</i>    | Ca_Kabuli_Chr07              | 40092168                       | (G/A)       |
| 13129       | CakSNP13129    | <i>Kabuli</i>    | Ca_Kabuli_Chr07              | 40092201                       | (G/A)       |
| 13130       | CakSNP13130    | <i>Kabuli</i>    | Ca_Kabuli_Chr07              | 40092203                       | (T/G)       |
| 13131       | CakSNP13131    | <i>Kabuli</i>    | Ca_Kabuli_Chr07              | 40092211                       | (C/T)       |
| 13132       | CakSNP13132    | <i>Kabuli</i>    | Ca_Kabuli_Chr07              | 40092214                       | (C/G)       |
| 13133       | CakSNP13133    | <i>Kabuli</i>    | Ca_Kabuli_Chr07              | 40092229                       | (C/A)       |
| 13134       | CakSNP13134    | <i>Kabuli</i>    | Ca_Kabuli_Chr07              | 40092237                       | (C/T)       |
| 13135       | CakSNP13135    | <i>Kabuli</i>    | Ca_Kabuli_Chr07              | 40092239                       | (G/A)       |
| 13136       | CakSNP13136    | <i>Kabuli</i>    | Ca_Kabuli_Chr07              | 40092250                       | (A/C)       |
| 13137       | CakSNP13137    | <i>Kabuli</i>    | Ca_Kabuli_Chr07              | 40092253                       | (C/T)       |
| 13138       | CakSNP13138    | <i>Kabuli</i>    | Ca_Kabuli_Chr07              | 40092256                       | (T/C)       |
| 13139       | CakSNP13139    | <i>Kabuli</i>    | Ca_Kabuli_Chr07              | 40092267                       | (G/C)       |
| 13140       | CakSNP13140    | <i>Kabuli</i>    | Ca_Kabuli_Chr07              | 40183449                       | (C/A)       |
| 13141       | CakSNP13141    | <i>Kabuli</i>    | Ca_Kabuli_Chr07              | 40183452                       | (A/C)       |
| 13142       | CakSNP13142    | <i>Kabuli</i>    | Ca_Kabuli_Chr07              | 40241674                       | (A/C)       |
| 13143       | CakSNP13143    | <i>Kabuli</i>    | Ca_Kabuli_Chr07              | 40242539                       | (A/G)       |
| 13144       | CakSNP13144    | <i>Kabuli</i>    | Ca_Kabuli_Chr07              | 40242765                       | (A/G)       |
| 13145       | CakSNP13145    | <i>Kabuli</i>    | Ca_Kabuli_Chr07              | 40243784                       | (G/A)       |
| 13146       | CakSNP13146    | <i>Kabuli</i>    | Ca_Kabuli_Chr07              | 40323213                       | (C/A)       |
| 13147       | CakSNP13147    | <i>Kabuli</i>    | Ca_Kabuli_Chr07              | 40323251                       | (T/A)       |

| <b>S.N.</b> | <b>SNP IDs</b> | <b>Cultivars</b> | <b>Chromosomes/scaffolds</b> | <b>Physical positions (bp)</b> | <b>SNPs</b> |
|-------------|----------------|------------------|------------------------------|--------------------------------|-------------|
| 13148       | CakSNP13148    | <i>Kabuli</i>    | Ca_Kabuli_Chr07              | 40429548                       | (A/G)       |
| 13149       | CakSNP13149    | <i>Kabuli</i>    | Ca_Kabuli_Chr07              | 40429552                       | (C/T)       |
| 13150       | CakSNP13150    | <i>Kabuli</i>    | Ca_Kabuli_Chr07              | 40429564                       | (G/T)       |
| 13151       | CakSNP13151    | <i>Kabuli</i>    | Ca_Kabuli_Chr07              | 40429573                       | (G/T)       |
| 13152       | CakSNP13152    | <i>Kabuli</i>    | Ca_Kabuli_Chr07              | 40429629                       | (G/T)       |
| 13153       | CakSNP13153    | <i>Kabuli</i>    | Ca_Kabuli_Chr07              | 40429621                       | (G/T)       |
| 13154       | CakSNP13154    | <i>Kabuli</i>    | Ca_Kabuli_Chr07              | 40429604                       | (C/T)       |
| 13155       | CakSNP13155    | <i>Kabuli</i>    | Ca_Kabuli_Chr07              | 40429600                       | (C/T)       |
| 13156       | CakSNP13156    | <i>Kabuli</i>    | Ca_Kabuli_Chr07              | 40429596                       | (G/A)       |
| 13157       | CakSNP13157    | <i>Kabuli</i>    | Ca_Kabuli_Chr07              | 40429567                       | (G/A)       |
| 13158       | CakSNP13158    | <i>Kabuli</i>    | Ca_Kabuli_Chr07              | 40456574                       | (T/C)       |
| 13159       | CakSNP13159    | <i>Kabuli</i>    | Ca_Kabuli_Chr07              | 40645278                       | (A/G)       |
| 13160       | CakSNP13160    | <i>Kabuli</i>    | Ca_Kabuli_Chr07              | 40645276                       | (A/G)       |
| 13161       | CakSNP13161    | <i>Kabuli</i>    | Ca_Kabuli_Chr07              | 40645208                       | (C/G)       |
| 13162       | CakSNP13162    | <i>Kabuli</i>    | Ca_Kabuli_Chr07              | 40889596                       | (A/C)       |
| 13163       | CakSNP13163    | <i>Kabuli</i>    | Ca_Kabuli_Chr07              | 40889598                       | (C/G)       |
| 13164       | CakSNP13164    | <i>Kabuli</i>    | Ca_Kabuli_Chr07              | 40889623                       | (G/A)       |
| 13165       | CakSNP13165    | <i>Kabuli</i>    | Ca_Kabuli_Chr07              | 40889632                       | (C/T)       |
| 13166       | CakSNP13166    | <i>Kabuli</i>    | Ca_Kabuli_Chr07              | 40889633                       | (G/A)       |
| 13167       | CakSNP13167    | <i>Kabuli</i>    | Ca_Kabuli_Chr07              | 40889640                       | (G/A)       |
| 13168       | CakSNP13168    | <i>Kabuli</i>    | Ca_Kabuli_Chr07              | 40889641                       | (C/T)       |
| 13169       | CakSNP13169    | <i>Kabuli</i>    | Ca_Kabuli_Chr07              | 40889643                       | (G/A)       |
| 13170       | CakSNP13170    | <i>Kabuli</i>    | Ca_Kabuli_Chr07              | 40889648                       | (T/A)       |
| 13171       | CakSNP13171    | <i>Kabuli</i>    | Ca_Kabuli_Chr07              | 40889649                       | (G/A)       |
| 13172       | CakSNP13172    | <i>Kabuli</i>    | Ca_Kabuli_Chr07              | 40889673                       | (C/A)       |
| 13173       | CakSNP13173    | <i>Kabuli</i>    | Ca_Kabuli_Chr07              | 40889670                       | (C/T)       |
| 13174       | CakSNP13174    | <i>Kabuli</i>    | Ca_Kabuli_Chr07              | 40889723                       | (C/G)       |
| 13175       | CakSNP13175    | <i>Kabuli</i>    | Ca_Kabuli_Chr07              | 40889684                       | (C/T)       |
| 13176       | CakSNP13176    | <i>Kabuli</i>    | Ca_Kabuli_Chr07              | 41282883                       | (A/T)       |
| 13177       | CakSNP13177    | <i>Kabuli</i>    | Ca_Kabuli_Chr07              | 41282961                       | (G/T)       |
| 13178       | CakSNP13178    | <i>Kabuli</i>    | Ca_Kabuli_Chr07              | 41282960                       | (A/C)       |
| 13179       | CakSNP13179    | <i>Kabuli</i>    | Ca_Kabuli_Chr07              | 41282957                       | (G/A)       |
| 13180       | CakSNP13180    | <i>Kabuli</i>    | Ca_Kabuli_Chr07              | 41325886                       | (A/G)       |
| 13181       | CakSNP13181    | <i>Kabuli</i>    | Ca_Kabuli_Chr07              | 41339748                       | (C/A)       |
| 13182       | CakSNP13182    | <i>Kabuli</i>    | Ca_Kabuli_Chr07              | 41349604                       | (T/C)       |
| 13183       | CakSNP13183    | <i>Kabuli</i>    | Ca_Kabuli_Chr07              | 41387509                       | (A/C)       |
| 13184       | CakSNP13184    | <i>Kabuli</i>    | Ca_Kabuli_Chr07              | 41387502                       | (A/C)       |
| 13185       | CakSNP13185    | <i>Kabuli</i>    | Ca_Kabuli_Chr07              | 41387475                       | (A/C)       |

| <b>S.N.</b> | <b>SNP IDs</b> | <b>Cultivars</b> | <b>Chromosomes/scaffolds</b> | <b>Physical positions (bp)</b> | <b>SNPs</b> |
|-------------|----------------|------------------|------------------------------|--------------------------------|-------------|
| 13186       | CakSNP13186    | <i>Kabuli</i>    | Ca_Kabuli_Chr07              | 41657180                       | (G/T)       |
| 13187       | CakSNP13187    | <i>Kabuli</i>    | Ca_Kabuli_Chr07              | 41657241                       | (T/C)       |
| 13188       | CakSNP13188    | <i>Kabuli</i>    | Ca_Kabuli_Chr07              | 41821410                       | (T/C)       |
| 13189       | CakSNP13189    | <i>Kabuli</i>    | Ca_Kabuli_Chr07              | 42166004                       | (C/T)       |
| 13190       | CakSNP13190    | <i>Kabuli</i>    | Ca_Kabuli_Chr07              | 42268628                       | (A/C)       |
| 13191       | CakSNP13191    | <i>Kabuli</i>    | Ca_Kabuli_Chr07              | 42272939                       | (G/C)       |
| 13192       | CakSNP13192    | <i>Kabuli</i>    | Ca_Kabuli_Chr07              | 42355002                       | (T/G)       |
| 13193       | CakSNP13193    | <i>Kabuli</i>    | Ca_Kabuli_Chr07              | 42354958                       | (G/A)       |
| 13194       | CakSNP13194    | <i>Kabuli</i>    | Ca_Kabuli_Chr07              | 42354938                       | (C/T)       |
| 13195       | CakSNP13195    | <i>Kabuli</i>    | Ca_Kabuli_Chr07              | 42354999                       | (C/T)       |
| 13196       | CakSNP13196    | <i>Kabuli</i>    | Ca_Kabuli_Chr07              | 42355011                       | (G/T)       |
| 13197       | CakSNP13197    | <i>Kabuli</i>    | Ca_Kabuli_Chr07              | 42566717                       | (A/G)       |
| 13198       | CakSNP13198    | <i>Kabuli</i>    | Ca_Kabuli_Chr07              | 42846882                       | (C/T)       |
| 13199       | CakSNP13199    | <i>Kabuli</i>    | Ca_Kabuli_Chr07              | 42851182                       | (T/C)       |
| 13200       | CakSNP13200    | <i>Kabuli</i>    | Ca_Kabuli_Chr07              | 43080817                       | (T/C)       |
| 13201       | CakSNP13201    | <i>Kabuli</i>    | Ca_Kabuli_Chr07              | 43118954                       | (A/C)       |
| 13202       | CakSNP13202    | <i>Kabuli</i>    | Ca_Kabuli_Chr07              | 43119266                       | (C/T)       |
| 13203       | CakSNP13203    | <i>Kabuli</i>    | Ca_Kabuli_Chr07              | 43210821                       | (A/T)       |
| 13204       | CakSNP13204    | <i>Kabuli</i>    | Ca_Kabuli_Chr07              | 43646117                       | (G/A)       |
| 13205       | CakSNP13205    | <i>Kabuli</i>    | Ca_Kabuli_Chr07              | 44232239                       | (G/A)       |
| 13206       | CakSNP13206    | <i>Kabuli</i>    | Ca_Kabuli_Chr07              | 44232204                       | (T/A)       |
| 13207       | CakSNP13207    | <i>Kabuli</i>    | Ca_Kabuli_Chr07              | 44232221                       | (C/T)       |
| 13208       | CakSNP13208    | <i>Kabuli</i>    | Ca_Kabuli_Chr07              | 44232266                       | (C/T)       |
| 13209       | CakSNP13209    | <i>Kabuli</i>    | Ca_Kabuli_Chr07              | 44540553                       | (T/G)       |
| 13210       | CakSNP13210    | <i>Kabuli</i>    | Ca_Kabuli_Chr07              | 44540595                       | (G/A)       |
| 13211       | CakSNP13211    | <i>Kabuli</i>    | Ca_Kabuli_Chr07              | 44540596                       | (C/A)       |
| 13212       | CakSNP13212    | <i>Kabuli</i>    | Ca_Kabuli_Chr07              | 44540629                       | (G/A)       |
| 13213       | CakSNP13213    | <i>Kabuli</i>    | Ca_Kabuli_Chr07              | 44540616                       | (C/A)       |
| 13214       | CakSNP13214    | <i>Kabuli</i>    | Ca_Kabuli_Chr07              | 44612651                       | (C/A)       |
| 13215       | CakSNP13215    | <i>Kabuli</i>    | Ca_Kabuli_Chr07              | 44747668                       | (C/T)       |
| 13216       | CakSNP13216    | <i>Kabuli</i>    | Ca_Kabuli_Chr07              | 44765450                       | (C/T)       |
| 13217       | CakSNP13217    | <i>Kabuli</i>    | Ca_Kabuli_Chr07              | 44765467                       | (G/T)       |
| 13218       | CakSNP13218    | <i>Kabuli</i>    | Ca_Kabuli_Chr07              | 44765522                       | (A/C)       |
| 13219       | CakSNP13219    | <i>Kabuli</i>    | Ca_Kabuli_Chr07              | 44877324                       | (A/C)       |
| 13220       | CakSNP13220    | <i>Kabuli</i>    | Ca_Kabuli_Chr07              | 44926768                       | (C/T)       |
| 13221       | CakSNP13221    | <i>Kabuli</i>    | Ca_Kabuli_Chr07              | 44926783                       | (C/A)       |
| 13222       | CakSNP13222    | <i>Kabuli</i>    | Ca_Kabuli_Chr07              | 44926815                       | (C/T)       |
| 13223       | CakSNP13223    | <i>Kabuli</i>    | Ca_Kabuli_Chr07              | 45147550                       | (A/G)       |

| <b>S.N.</b> | <b>SNP IDs</b> | <b>Cultivars</b> | <b>Chromosomes/scaffolds</b> | <b>Physical positions (bp)</b> | <b>SNPs</b> |
|-------------|----------------|------------------|------------------------------|--------------------------------|-------------|
| 13224       | CakSNP13224    | <i>Kabuli</i>    | Ca_Kabuli_Chr07              | 45280659                       | (T/A)       |
| 13225       | CakSNP13225    | <i>Kabuli</i>    | Ca_Kabuli_Chr07              | 45289633                       | (T/C)       |
| 13226       | CakSNP13226    | <i>Kabuli</i>    | Ca_Kabuli_Chr07              | 45936581                       | (C/A)       |
| 13227       | CakSNP13227    | <i>Kabuli</i>    | Ca_Kabuli_Chr07              | 46053109                       | (G/A)       |
| 13228       | CakSNP13228    | <i>Kabuli</i>    | Ca_Kabuli_Chr07              | 46394656                       | (A/G)       |
| 13229       | CakSNP13229    | <i>Kabuli</i>    | Ca_Kabuli_Chr07              | 46485934                       | (A/G)       |
| 13230       | CakSNP13230    | <i>Kabuli</i>    | Ca_Kabuli_Chr07              | 46747255                       | (A/C)       |
| 13231       | CakSNP13231    | <i>Kabuli</i>    | Ca_Kabuli_Chr07              | 46747283                       | (T/C)       |
| 13232       | CakSNP13232    | <i>Kabuli</i>    | Ca_Kabuli_Chr07              | 46747290                       | (G/T)       |
| 13233       | CakSNP13233    | <i>Kabuli</i>    | Ca_Kabuli_Chr07              | 46747295                       | (G/C)       |
| 13234       | CakSNP13234    | <i>Kabuli</i>    | Ca_Kabuli_Chr07              | 46747309                       | (C/T)       |
| 13235       | CakSNP13235    | <i>Kabuli</i>    | Ca_Kabuli_Chr07              | 46747330                       | (G/A)       |
| 13236       | CakSNP13236    | <i>Kabuli</i>    | Ca_Kabuli_Chr07              | 46823471                       | (T/G)       |
| 13237       | CakSNP13237    | <i>Kabuli</i>    | Ca_Kabuli_Chr07              | 46823949                       | (G/T)       |
| 13238       | CakSNP13238    | <i>Kabuli</i>    | Ca_Kabuli_Chr07              | 46826036                       | (T/A)       |
| 13239       | CakSNP13239    | <i>Kabuli</i>    | Ca_Kabuli_Chr07              | 46826030                       | (T/C)       |
| 13240       | CakSNP13240    | <i>Kabuli</i>    | Ca_Kabuli_Chr07              | 46826028                       | (C/A)       |
| 13241       | CakSNP13241    | <i>Kabuli</i>    | Ca_Kabuli_Chr07              | 46826020                       | (G/A)       |
| 13242       | CakSNP13242    | <i>Kabuli</i>    | Ca_Kabuli_Chr07              | 46826015                       | (G/A)       |
| 13243       | CakSNP13243    | <i>Kabuli</i>    | Ca_Kabuli_Chr07              | 46826008                       | (A/T)       |
| 13244       | CakSNP13244    | <i>Kabuli</i>    | Ca_Kabuli_Chr07              | 46825997                       | (A/G)       |
| 13245       | CakSNP13245    | <i>Kabuli</i>    | Ca_Kabuli_Chr07              | 46825992                       | (T/G)       |
| 13246       | CakSNP13246    | <i>Kabuli</i>    | Ca_Kabuli_Chr07              | 46825985                       | (T/G)       |
| 13247       | CakSNP13247    | <i>Kabuli</i>    | Ca_Kabuli_Chr07              | 46825957                       | (A/T)       |
| 13248       | CakSNP13248    | <i>Kabuli</i>    | Ca_Kabuli_Chr07              | 46825952                       | (A/G)       |
| 13249       | CakSNP13249    | <i>Kabuli</i>    | Ca_Kabuli_Chr07              | 47127331                       | (T/G)       |
| 13250       | CakSNP13250    | <i>Kabuli</i>    | Ca_Kabuli_Chr07              | 47127342                       | (T/G)       |
| 13251       | CakSNP13251    | <i>Kabuli</i>    | Ca_Kabuli_Chr07              | 47127343                       | (C/T)       |
| 13252       | CakSNP13252    | <i>Kabuli</i>    | Ca_Kabuli_Chr07              | 47159646                       | (A/C)       |
| 13253       | CakSNP13253    | <i>Kabuli</i>    | Ca_Kabuli_Chr07              | 47335940                       | (G/A)       |
| 13254       | CakSNP13254    | <i>Kabuli</i>    | Ca_Kabuli_Chr07              | 47335916                       | (C/G)       |
| 13255       | CakSNP13255    | <i>Kabuli</i>    | Ca_Kabuli_Chr07              | 47524173                       | (A/C)       |
| 13256       | CakSNP13256    | <i>Kabuli</i>    | Ca_Kabuli_Chr07              | 47554330                       | (C/G)       |
| 13257       | CakSNP13257    | <i>Kabuli</i>    | Ca_Kabuli_Chr07              | 47694706                       | (A/C)       |
| 13258       | CakSNP13258    | <i>Kabuli</i>    | Ca_Kabuli_Chr07              | 47839934                       | (G/A)       |
| 13259       | CakSNP13259    | <i>Kabuli</i>    | Ca_Kabuli_Chr07              | 47839952                       | (G/T)       |
| 13260       | CakSNP13260    | <i>Kabuli</i>    | Ca_Kabuli_Chr07              | 47840034                       | (A/G)       |
| 13261       | CakSNP13261    | <i>Kabuli</i>    | Ca_Kabuli_Chr07              | 47840092                       | (A/C)       |

| <b>S.N.</b> | <b>SNP IDs</b> | <b>Cultivars</b> | <b>Chromosomes/scaffolds</b> | <b>Physical positions (bp)</b> | <b>SNPs</b> |
|-------------|----------------|------------------|------------------------------|--------------------------------|-------------|
| 13262       | CakSNP13262    | <i>Kabuli</i>    | Ca_Kabuli_Chr07              | 48102586                       | (G/T)       |
| 13263       | CakSNP13263    | <i>Kabuli</i>    | Ca_Kabuli_Chr07              | 48200865                       | (A/G)       |
| 13264       | CakSNP13264    | <i>Kabuli</i>    | Ca_Kabuli_Chr07              | 48200852                       | (G/A)       |
| 13265       | CakSNP13265    | <i>Kabuli</i>    | Ca_Kabuli_Chr07              | 48200822                       | (G/A)       |
| 13266       | CakSNP13266    | <i>Kabuli</i>    | Ca_Kabuli_Chr07              | 48200820                       | (A/C)       |
| 13267       | CakSNP13267    | <i>Kabuli</i>    | Ca_Kabuli_Chr07              | 48200823                       | (G/A)       |
| 13268       | CakSNP13268    | <i>Kabuli</i>    | Ca_Kabuli_Chr07              | 48200848                       | (T/G)       |
| 13269       | CakSNP13269    | <i>Kabuli</i>    | Ca_Kabuli_Chr07              | 48509506                       | (G/T)       |
| 13270       | CakSNP13270    | <i>Kabuli</i>    | Ca_Kabuli_Chr08              | 54095                          | (A/C)       |
| 13271       | CakSNP13271    | <i>Kabuli</i>    | Ca_Kabuli_Chr08              | 85693                          | (T/G)       |
| 13272       | CakSNP13272    | <i>Kabuli</i>    | Ca_Kabuli_Chr08              | 85697                          | (G/A)       |
| 13273       | CakSNP13273    | <i>Kabuli</i>    | Ca_Kabuli_Chr08              | 85707                          | (C/A)       |
| 13274       | CakSNP13274    | <i>Kabuli</i>    | Ca_Kabuli_Chr08              | 85710                          | (C/A)       |
| 13275       | CakSNP13275    | <i>Kabuli</i>    | Ca_Kabuli_Chr08              | 158986                         | (C/G)       |
| 13276       | CakSNP13276    | <i>Kabuli</i>    | Ca_Kabuli_Chr08              | 177457                         | (C/T)       |
| 13277       | CakSNP13277    | <i>Kabuli</i>    | Ca_Kabuli_Chr08              | 177436                         | (A/G)       |
| 13278       | CakSNP13278    | <i>Kabuli</i>    | Ca_Kabuli_Chr08              | 177405                         | (G/A)       |
| 13279       | CakSNP13279    | <i>Kabuli</i>    | Ca_Kabuli_Chr08              | 184444                         | (G/A)       |
| 13280       | CakSNP13280    | <i>Kabuli</i>    | Ca_Kabuli_Chr08              | 218813                         | (C/T)       |
| 13281       | CakSNP13281    | <i>Kabuli</i>    | Ca_Kabuli_Chr08              | 218828                         | (T/G)       |
| 13282       | CakSNP13282    | <i>Kabuli</i>    | Ca_Kabuli_Chr08              | 218957                         | (G/T)       |
| 13283       | CakSNP13283    | <i>Kabuli</i>    | Ca_Kabuli_Chr08              | 218928                         | (A/G)       |
| 13284       | CakSNP13284    | <i>Kabuli</i>    | Ca_Kabuli_Chr08              | 249654                         | (A/C)       |
| 13285       | CakSNP13285    | <i>Kabuli</i>    | Ca_Kabuli_Chr08              | 253786                         | (G/A)       |
| 13286       | CakSNP13286    | <i>Kabuli</i>    | Ca_Kabuli_Chr08              | 281622                         | (G/A)       |
| 13287       | CakSNP13287    | <i>Kabuli</i>    | Ca_Kabuli_Chr08              | 281608                         | (T/A)       |
| 13288       | CakSNP13288    | <i>Kabuli</i>    | Ca_Kabuli_Chr08              | 281630                         | (A/C)       |
| 13289       | CakSNP13289    | <i>Kabuli</i>    | Ca_Kabuli_Chr08              | 283147                         | (C/T)       |
| 13290       | CakSNP13290    | <i>Kabuli</i>    | Ca_Kabuli_Chr08              | 285779                         | (G/A)       |
| 13291       | CakSNP13291    | <i>Kabuli</i>    | Ca_Kabuli_Chr08              | 356295                         | (A/T)       |
| 13292       | CakSNP13292    | <i>Kabuli</i>    | Ca_Kabuli_Chr08              | 411967                         | (G/A)       |
| 13293       | CakSNP13293    | <i>Kabuli</i>    | Ca_Kabuli_Chr08              | 499819                         | (A/C)       |
| 13294       | CakSNP13294    | <i>Kabuli</i>    | Ca_Kabuli_Chr08              | 499890                         | (T/C)       |
| 13295       | CakSNP13295    | <i>Kabuli</i>    | Ca_Kabuli_Chr08              | 510824                         | (G/A)       |
| 13296       | CakSNP13296    | <i>Kabuli</i>    | Ca_Kabuli_Chr08              | 560477                         | (C/T)       |
| 13297       | CakSNP13297    | <i>Kabuli</i>    | Ca_Kabuli_Chr08              | 560451                         | (C/T)       |
| 13298       | CakSNP13298    | <i>Kabuli</i>    | Ca_Kabuli_Chr08              | 560604                         | (T/G)       |
| 13299       | CakSNP13299    | <i>Kabuli</i>    | Ca_Kabuli_Chr08              | 560746                         | (A/G)       |



| <b>S.N.</b> | <b>SNP IDs</b> | <b>Cultivars</b> | <b>Chromosomes/scaffolds</b> | <b>Physical positions (bp)</b> | <b>SNPs</b> |
|-------------|----------------|------------------|------------------------------|--------------------------------|-------------|
| 13300       | CakSNP13300    | <i>Kabuli</i>    | Ca_Kabuli_Chr08              | 566112                         | (A/G)       |
| 13301       | CakSNP13301    | <i>Kabuli</i>    | Ca_Kabuli_Chr08              | 566107                         | (C/T)       |
| 13302       | CakSNP13302    | <i>Kabuli</i>    | Ca_Kabuli_Chr08              | 566094                         | (A/G)       |
| 13303       | CakSNP13303    | <i>Kabuli</i>    | Ca_Kabuli_Chr08              | 596171                         | (C/T)       |
| 13304       | CakSNP13304    | <i>Kabuli</i>    | Ca_Kabuli_Chr08              | 614324                         | (G/A)       |
| 13305       | CakSNP13305    | <i>Kabuli</i>    | Ca_Kabuli_Chr08              | 614301                         | (C/A)       |
| 13306       | CakSNP13306    | <i>Kabuli</i>    | Ca_Kabuli_Chr08              | 619605                         | (T/C)       |
| 13307       | CakSNP13307    | <i>Kabuli</i>    | Ca_Kabuli_Chr08              | 634862                         | (C/T)       |
| 13308       | CakSNP13308    | <i>Kabuli</i>    | Ca_Kabuli_Chr08              | 634843                         | (G/A)       |
| 13309       | CakSNP13309    | <i>Kabuli</i>    | Ca_Kabuli_Chr08              | 634818                         | (G/T)       |
| 13310       | CakSNP13310    | <i>Kabuli</i>    | Ca_Kabuli_Chr08              | 634921                         | (C/G)       |
| 13311       | CakSNP13311    | <i>Kabuli</i>    | Ca_Kabuli_Chr08              | 649491                         | (A/C)       |
| 13312       | CakSNP13312    | <i>Kabuli</i>    | Ca_Kabuli_Chr08              | 660610                         | (T/G)       |
| 13313       | CakSNP13313    | <i>Kabuli</i>    | Ca_Kabuli_Chr08              | 666294                         | (G/A)       |
| 13314       | CakSNP13314    | <i>Kabuli</i>    | Ca_Kabuli_Chr08              | 666288                         | (A/T)       |
| 13315       | CakSNP13315    | <i>Kabuli</i>    | Ca_Kabuli_Chr08              | 666284                         | (T/A)       |
| 13316       | CakSNP13316    | <i>Kabuli</i>    | Ca_Kabuli_Chr08              | 666274                         | (T/G)       |
| 13317       | CakSNP13317    | <i>Kabuli</i>    | Ca_Kabuli_Chr08              | 672962                         | (C/T)       |
| 13318       | CakSNP13318    | <i>Kabuli</i>    | Ca_Kabuli_Chr08              | 673820                         | (A/G)       |
| 13319       | CakSNP13319    | <i>Kabuli</i>    | Ca_Kabuli_Chr08              | 674902                         | (T/G)       |
| 13320       | CakSNP13320    | <i>Kabuli</i>    | Ca_Kabuli_Chr08              | 701803                         | (C/T)       |
| 13321       | CakSNP13321    | <i>Kabuli</i>    | Ca_Kabuli_Chr08              | 701811                         | (T/G)       |
| 13322       | CakSNP13322    | <i>Kabuli</i>    | Ca_Kabuli_Chr08              | 701837                         | (G/A)       |
| 13323       | CakSNP13323    | <i>Kabuli</i>    | Ca_Kabuli_Chr08              | 706514                         | (T/C)       |
| 13324       | CakSNP13324    | <i>Kabuli</i>    | Ca_Kabuli_Chr08              | 706482                         | (G/C)       |
| 13325       | CakSNP13325    | <i>Kabuli</i>    | Ca_Kabuli_Chr08              | 706614                         | (C/T)       |
| 13326       | CakSNP13326    | <i>Kabuli</i>    | Ca_Kabuli_Chr08              | 706793                         | (A/G)       |
| 13327       | CakSNP13327    | <i>Kabuli</i>    | Ca_Kabuli_Chr08              | 706800                         | (G/A)       |
| 13328       | CakSNP13328    | <i>Kabuli</i>    | Ca_Kabuli_Chr08              | 709063                         | (T/C)       |
| 13329       | CakSNP13329    | <i>Kabuli</i>    | Ca_Kabuli_Chr08              | 709094                         | (T/C)       |
| 13330       | CakSNP13330    | <i>Kabuli</i>    | Ca_Kabuli_Chr08              | 709124                         | (A/T)       |
| 13331       | CakSNP13331    | <i>Kabuli</i>    | Ca_Kabuli_Chr08              | 714967                         | (A/G)       |
| 13332       | CakSNP13332    | <i>Kabuli</i>    | Ca_Kabuli_Chr08              | 714974                         | (G/A)       |
| 13333       | CakSNP13333    | <i>Kabuli</i>    | Ca_Kabuli_Chr08              | 777760                         | (A/T)       |
| 13334       | CakSNP13334    | <i>Kabuli</i>    | Ca_Kabuli_Chr08              | 777772                         | (G/A)       |
| 13335       | CakSNP13335    | <i>Kabuli</i>    | Ca_Kabuli_Chr08              | 777776                         | (C/G)       |
| 13336       | CakSNP13336    | <i>Kabuli</i>    | Ca_Kabuli_Chr08              | 779589                         | (C/G)       |
| 13337       | CakSNP13337    | <i>Kabuli</i>    | Ca_Kabuli_Chr08              | 779611                         | (T/C)       |

| <b>S.N.</b> | <b>SNP IDs</b> | <b>Cultivars</b> | <b>Chromosomes/scaffolds</b> | <b>Physical positions (bp)</b> | <b>SNPs</b> |
|-------------|----------------|------------------|------------------------------|--------------------------------|-------------|
| 13338       | CakSNP13338    | <i>Kabuli</i>    | Ca_Kabuli_Chr08              | 779640                         | (T/C)       |
| 13339       | CakSNP13339    | <i>Kabuli</i>    | Ca_Kabuli_Chr08              | 817321                         | (T/G)       |
| 13340       | CakSNP13340    | <i>Kabuli</i>    | Ca_Kabuli_Chr08              | 822302                         | (A/G)       |
| 13341       | CakSNP13341    | <i>Kabuli</i>    | Ca_Kabuli_Chr08              | 822942                         | (T/G)       |
| 13342       | CakSNP13342    | <i>Kabuli</i>    | Ca_Kabuli_Chr08              | 822976                         | (C/T)       |
| 13343       | CakSNP13343    | <i>Kabuli</i>    | Ca_Kabuli_Chr08              | 839924                         | (C/G)       |
| 13344       | CakSNP13344    | <i>Kabuli</i>    | Ca_Kabuli_Chr08              | 855332                         | (G/A)       |
| 13345       | CakSNP13345    | <i>Kabuli</i>    | Ca_Kabuli_Chr08              | 866741                         | (A/C)       |
| 13346       | CakSNP13346    | <i>Kabuli</i>    | Ca_Kabuli_Chr08              | 871666                         | (C/G)       |
| 13347       | CakSNP13347    | <i>Kabuli</i>    | Ca_Kabuli_Chr08              | 875236                         | (T/G)       |
| 13348       | CakSNP13348    | <i>Kabuli</i>    | Ca_Kabuli_Chr08              | 894184                         | (C/A)       |
| 13349       | CakSNP13349    | <i>Kabuli</i>    | Ca_Kabuli_Chr08              | 895883                         | (G/A)       |
| 13350       | CakSNP13350    | <i>Kabuli</i>    | Ca_Kabuli_Chr08              | 895947                         | (C/T)       |
| 13351       | CakSNP13351    | <i>Kabuli</i>    | Ca_Kabuli_Chr08              | 897417                         | (T/C)       |
| 13352       | CakSNP13352    | <i>Kabuli</i>    | Ca_Kabuli_Chr08              | 898089                         | (C/T)       |
| 13353       | CakSNP13353    | <i>Kabuli</i>    | Ca_Kabuli_Chr08              | 898150                         | (C/A)       |
| 13354       | CakSNP13354    | <i>Kabuli</i>    | Ca_Kabuli_Chr08              | 898152                         | (A/G)       |
| 13355       | CakSNP13355    | <i>Kabuli</i>    | Ca_Kabuli_Chr08              | 898173                         | (G/T)       |
| 13356       | CakSNP13356    | <i>Kabuli</i>    | Ca_Kabuli_Chr08              | 898164                         | (G/T)       |
| 13357       | CakSNP13357    | <i>Kabuli</i>    | Ca_Kabuli_Chr08              | 898226                         | (C/G)       |
| 13358       | CakSNP13358    | <i>Kabuli</i>    | Ca_Kabuli_Chr08              | 898251                         | (G/T)       |
| 13359       | CakSNP13359    | <i>Kabuli</i>    | Ca_Kabuli_Chr08              | 919690                         | (T/C)       |
| 13360       | CakSNP13360    | <i>Kabuli</i>    | Ca_Kabuli_Chr08              | 923820                         | (T/C)       |
| 13361       | CakSNP13361    | <i>Kabuli</i>    | Ca_Kabuli_Chr08              | 924720                         | (G/T)       |
| 13362       | CakSNP13362    | <i>Kabuli</i>    | Ca_Kabuli_Chr08              | 924681                         | (C/T)       |
| 13363       | CakSNP13363    | <i>Kabuli</i>    | Ca_Kabuli_Chr08              | 924715                         | (A/G)       |
| 13364       | CakSNP13364    | <i>Kabuli</i>    | Ca_Kabuli_Chr08              | 924732                         | (G/T)       |
| 13365       | CakSNP13365    | <i>Kabuli</i>    | Ca_Kabuli_Chr08              | 974170                         | (T/C)       |
| 13366       | CakSNP13366    | <i>Kabuli</i>    | Ca_Kabuli_Chr08              | 974159                         | (T/G)       |
| 13367       | CakSNP13367    | <i>Kabuli</i>    | Ca_Kabuli_Chr08              | 1011333                        | (C/T)       |
| 13368       | CakSNP13368    | <i>Kabuli</i>    | Ca_Kabuli_Chr08              | 1011320                        | (G/T)       |
| 13369       | CakSNP13369    | <i>Kabuli</i>    | Ca_Kabuli_Chr08              | 1011327                        | (G/A)       |
| 13370       | CakSNP13370    | <i>Kabuli</i>    | Ca_Kabuli_Chr08              | 1043905                        | (T/C)       |
| 13371       | CakSNP13371    | <i>Kabuli</i>    | Ca_Kabuli_Chr08              | 1070728                        | (T/C)       |
| 13372       | CakSNP13372    | <i>Kabuli</i>    | Ca_Kabuli_Chr08              | 1077334                        | (C/T)       |
| 13373       | CakSNP13373    | <i>Kabuli</i>    | Ca_Kabuli_Chr08              | 1077430                        | (C/T)       |
| 13374       | CakSNP13374    | <i>Kabuli</i>    | Ca_Kabuli_Chr08              | 1119568                        | (T/C)       |
| 13375       | CakSNP13375    | <i>Kabuli</i>    | Ca_Kabuli_Chr08              | 1119781                        | (A/G)       |

| <b>S.N.</b> | <b>SNP IDs</b> | <b>Cultivars</b> | <b>Chromosomes/scaffolds</b> | <b>Physical positions (bp)</b> | <b>SNPs</b> |
|-------------|----------------|------------------|------------------------------|--------------------------------|-------------|
| 13376       | CakSNP13376    | <i>Kabuli</i>    | Ca_Kabuli_Chr08              | 1119773                        | (T/G)       |
| 13377       | CakSNP13377    | <i>Kabuli</i>    | Ca_Kabuli_Chr08              | 1119761                        | (G/T)       |
| 13378       | CakSNP13378    | <i>Kabuli</i>    | Ca_Kabuli_Chr08              | 1138275                        | (G/A)       |
| 13379       | CakSNP13379    | <i>Kabuli</i>    | Ca_Kabuli_Chr08              | 1138394                        | (A/G)       |
| 13380       | CakSNP13380    | <i>Kabuli</i>    | Ca_Kabuli_Chr08              | 1155597                        | (C/T)       |
| 13381       | CakSNP13381    | <i>Kabuli</i>    | Ca_Kabuli_Chr08              | 1155636                        | (T/C)       |
| 13382       | CakSNP13382    | <i>Kabuli</i>    | Ca_Kabuli_Chr08              | 1155639                        | (T/A)       |
| 13383       | CakSNP13383    | <i>Kabuli</i>    | Ca_Kabuli_Chr08              | 1155641                        | (C/G)       |
| 13384       | CakSNP13384    | <i>Kabuli</i>    | Ca_Kabuli_Chr08              | 1174369                        | (A/G)       |
| 13385       | CakSNP13385    | <i>Kabuli</i>    | Ca_Kabuli_Chr08              | 1193297                        | (C/T)       |
| 13386       | CakSNP13386    | <i>Kabuli</i>    | Ca_Kabuli_Chr08              | 1194886                        | (G/A)       |
| 13387       | CakSNP13387    | <i>Kabuli</i>    | Ca_Kabuli_Chr08              | 1194888                        | (A/G)       |
| 13388       | CakSNP13388    | <i>Kabuli</i>    | Ca_Kabuli_Chr08              | 1241739                        | (C/T)       |
| 13389       | CakSNP13389    | <i>Kabuli</i>    | Ca_Kabuli_Chr08              | 1262576                        | (T/C)       |
| 13390       | CakSNP13390    | <i>Kabuli</i>    | Ca_Kabuli_Chr08              | 1262561                        | (C/T)       |
| 13391       | CakSNP13391    | <i>Kabuli</i>    | Ca_Kabuli_Chr08              | 1262660                        | (C/A)       |
| 13392       | CakSNP13392    | <i>Kabuli</i>    | Ca_Kabuli_Chr08              | 1262686                        | (T/G)       |
| 13393       | CakSNP13393    | <i>Kabuli</i>    | Ca_Kabuli_Chr08              | 1265537                        | (G/A)       |
| 13394       | CakSNP13394    | <i>Kabuli</i>    | Ca_Kabuli_Chr08              | 1265535                        | (A/G)       |
| 13395       | CakSNP13395    | <i>Kabuli</i>    | Ca_Kabuli_Chr08              | 1265509                        | (T/C)       |
| 13396       | CakSNP13396    | <i>Kabuli</i>    | Ca_Kabuli_Chr08              | 1265595                        | (G/T)       |
| 13397       | CakSNP13397    | <i>Kabuli</i>    | Ca_Kabuli_Chr08              | 1265579                        | (A/G)       |
| 13398       | CakSNP13398    | <i>Kabuli</i>    | Ca_Kabuli_Chr08              | 1265577                        | (T/G)       |
| 13399       | CakSNP13399    | <i>Kabuli</i>    | Ca_Kabuli_Chr08              | 1382266                        | (G/A)       |
| 13400       | CakSNP13400    | <i>Kabuli</i>    | Ca_Kabuli_Chr08              | 1382433                        | (G/T)       |
| 13401       | CakSNP13401    | <i>Kabuli</i>    | Ca_Kabuli_Chr08              | 1382454                        | (A/C)       |
| 13402       | CakSNP13402    | <i>Kabuli</i>    | Ca_Kabuli_Chr08              | 1433436                        | (T/C)       |
| 13403       | CakSNP13403    | <i>Kabuli</i>    | Ca_Kabuli_Chr08              | 1477523                        | (T/C)       |
| 13404       | CakSNP13404    | <i>Kabuli</i>    | Ca_Kabuli_Chr08              | 1487202                        | (G/C)       |
| 13405       | CakSNP13405    | <i>Kabuli</i>    | Ca_Kabuli_Chr08              | 1503621                        | (C/T)       |
| 13406       | CakSNP13406    | <i>Kabuli</i>    | Ca_Kabuli_Chr08              | 1503595                        | (C/T)       |
| 13407       | CakSNP13407    | <i>Kabuli</i>    | Ca_Kabuli_Chr08              | 1503588                        | (T/C)       |
| 13408       | CakSNP13408    | <i>Kabuli</i>    | Ca_Kabuli_Chr08              | 1504859                        | (A/G)       |
| 13409       | CakSNP13409    | <i>Kabuli</i>    | Ca_Kabuli_Chr08              | 1507709                        | (T/G)       |
| 13410       | CakSNP13410    | <i>Kabuli</i>    | Ca_Kabuli_Chr08              | 1507782                        | (G/C)       |
| 13411       | CakSNP13411    | <i>Kabuli</i>    | Ca_Kabuli_Chr08              | 1518285                        | (A/C)       |
| 13412       | CakSNP13412    | <i>Kabuli</i>    | Ca_Kabuli_Chr08              | 1518297                        | (T/G)       |
| 13413       | CakSNP13413    | <i>Kabuli</i>    | Ca_Kabuli_Chr08              | 1518355                        | (G/A)       |

| <b>S.N.</b> | <b>SNP IDs</b> | <b>Cultivars</b> | <b>Chromosomes/scaffolds</b> | <b>Physical positions (bp)</b> | <b>SNPs</b> |
|-------------|----------------|------------------|------------------------------|--------------------------------|-------------|
| 13414       | CakSNP13414    | <i>Kabuli</i>    | Ca_Kabuli_Chr08              | 1534461                        | (A/C)       |
| 13415       | CakSNP13415    | <i>Kabuli</i>    | Ca_Kabuli_Chr08              | 1544916                        | (C/T)       |
| 13416       | CakSNP13416    | <i>Kabuli</i>    | Ca_Kabuli_Chr08              | 1552082                        | (T/A)       |
| 13417       | CakSNP13417    | <i>Kabuli</i>    | Ca_Kabuli_Chr08              | 1552143                        | (A/G)       |
| 13418       | CakSNP13418    | <i>Kabuli</i>    | Ca_Kabuli_Chr08              | 1554964                        | (T/C)       |
| 13419       | CakSNP13419    | <i>Kabuli</i>    | Ca_Kabuli_Chr08              | 1555017                        | (C/A)       |
| 13420       | CakSNP13420    | <i>Kabuli</i>    | Ca_Kabuli_Chr08              | 1555122                        | (A/G)       |
| 13421       | CakSNP13421    | <i>Kabuli</i>    | Ca_Kabuli_Chr08              | 1557492                        | (C/T)       |
| 13422       | CakSNP13422    | <i>Kabuli</i>    | Ca_Kabuli_Chr08              | 1573877                        | (G/T)       |
| 13423       | CakSNP13423    | <i>Kabuli</i>    | Ca_Kabuli_Chr08              | 1612107                        | (G/A)       |
| 13424       | CakSNP13424    | <i>Kabuli</i>    | Ca_Kabuli_Chr08              | 1612099                        | (A/G)       |
| 13425       | CakSNP13425    | <i>Kabuli</i>    | Ca_Kabuli_Chr08              | 1612221                        | (C/G)       |
| 13426       | CakSNP13426    | <i>Kabuli</i>    | Ca_Kabuli_Chr08              | 1667832                        | (T/C)       |
| 13427       | CakSNP13427    | <i>Kabuli</i>    | Ca_Kabuli_Chr08              | 1675895                        | (C/T)       |
| 13428       | CakSNP13428    | <i>Kabuli</i>    | Ca_Kabuli_Chr08              | 1675888                        | (C/T)       |
| 13429       | CakSNP13429    | <i>Kabuli</i>    | Ca_Kabuli_Chr08              | 1708743                        | (C/T)       |
| 13430       | CakSNP13430    | <i>Kabuli</i>    | Ca_Kabuli_Chr08              | 1708860                        | (T/C)       |
| 13431       | CakSNP13431    | <i>Kabuli</i>    | Ca_Kabuli_Chr08              | 1718032                        | (C/T)       |
| 13432       | CakSNP13432    | <i>Kabuli</i>    | Ca_Kabuli_Chr08              | 1723593                        | (G/A)       |
| 13433       | CakSNP13433    | <i>Kabuli</i>    | Ca_Kabuli_Chr08              | 1743097                        | (G/A)       |
| 13434       | CakSNP13434    | <i>Kabuli</i>    | Ca_Kabuli_Chr08              | 1747523                        | (T/A)       |
| 13435       | CakSNP13435    | <i>Kabuli</i>    | Ca_Kabuli_Chr08              | 1747522                        | (T/C)       |
| 13436       | CakSNP13436    | <i>Kabuli</i>    | Ca_Kabuli_Chr08              | 1782034                        | (C/G)       |
| 13437       | CakSNP13437    | <i>Kabuli</i>    | Ca_Kabuli_Chr08              | 1794755                        | (C/A)       |
| 13438       | CakSNP13438    | <i>Kabuli</i>    | Ca_Kabuli_Chr08              | 1794756                        | (G/T)       |
| 13439       | CakSNP13439    | <i>Kabuli</i>    | Ca_Kabuli_Chr08              | 1794759                        | (C/T)       |
| 13440       | CakSNP13440    | <i>Kabuli</i>    | Ca_Kabuli_Chr08              | 1794810                        | (G/A)       |
| 13441       | CakSNP13441    | <i>Kabuli</i>    | Ca_Kabuli_Chr08              | 1817388                        | (T/C)       |
| 13442       | CakSNP13442    | <i>Kabuli</i>    | Ca_Kabuli_Chr08              | 1830230                        | (A/T)       |
| 13443       | CakSNP13443    | <i>Kabuli</i>    | Ca_Kabuli_Chr08              | 1830348                        | (T/C)       |
| 13444       | CakSNP13444    | <i>Kabuli</i>    | Ca_Kabuli_Chr08              | 1846478                        | (A/G)       |
| 13445       | CakSNP13445    | <i>Kabuli</i>    | Ca_Kabuli_Chr08              | 1893613                        | (T/C)       |
| 13446       | CakSNP13446    | <i>Kabuli</i>    | Ca_Kabuli_Chr08              | 1932975                        | (T/C)       |
| 13447       | CakSNP13447    | <i>Kabuli</i>    | Ca_Kabuli_Chr08              | 1932981                        | (T/C)       |
| 13448       | CakSNP13448    | <i>Kabuli</i>    | Ca_Kabuli_Chr08              | 1932990                        | (A/C)       |
| 13449       | CakSNP13449    | <i>Kabuli</i>    | Ca_Kabuli_Chr08              | 1932993                        | (C/T)       |
| 13450       | CakSNP13450    | <i>Kabuli</i>    | Ca_Kabuli_Chr08              | 1932997                        | (G/T)       |
| 13451       | CakSNP13451    | <i>Kabuli</i>    | Ca_Kabuli_Chr08              | 1933026                        | (G/A)       |

| <b>S.N.</b> | <b>SNP IDs</b> | <b>Cultivars</b> | <b>Chromosomes/scaffolds</b> | <b>Physical positions (bp)</b> | <b>SNPs</b> |
|-------------|----------------|------------------|------------------------------|--------------------------------|-------------|
| 13452       | CakSNP13452    | <i>Kabuli</i>    | Ca_Kabuli_Chr08              | 1933064                        | (G/C)       |
| 13453       | CakSNP13453    | <i>Kabuli</i>    | Ca_Kabuli_Chr08              | 1933053                        | (G/A)       |
| 13454       | CakSNP13454    | <i>Kabuli</i>    | Ca_Kabuli_Chr08              | 1933052                        | (T/C)       |
| 13455       | CakSNP13455    | <i>Kabuli</i>    | Ca_Kabuli_Chr08              | 1933039                        | (G/T)       |
| 13456       | CakSNP13456    | <i>Kabuli</i>    | Ca_Kabuli_Chr08              | 1933035                        | (T/A)       |
| 13457       | CakSNP13457    | <i>Kabuli</i>    | Ca_Kabuli_Chr08              | 1958433                        | (G/C)       |
| 13458       | CakSNP13458    | <i>Kabuli</i>    | Ca_Kabuli_Chr08              | 1958415                        | (T/G)       |
| 13459       | CakSNP13459    | <i>Kabuli</i>    | Ca_Kabuli_Chr08              | 1978964                        | (G/C)       |
| 13460       | CakSNP13460    | <i>Kabuli</i>    | Ca_Kabuli_Chr08              | 1980189                        | (T/A)       |
| 13461       | CakSNP13461    | <i>Kabuli</i>    | Ca_Kabuli_Chr08              | 2004509                        | (A/G)       |
| 13462       | CakSNP13462    | <i>Kabuli</i>    | Ca_Kabuli_Chr08              | 2004577                        | (G/C)       |
| 13463       | CakSNP13463    | <i>Kabuli</i>    | Ca_Kabuli_Chr08              | 2029405                        | (C/A)       |
| 13464       | CakSNP13464    | <i>Kabuli</i>    | Ca_Kabuli_Chr08              | 2029384                        | (T/C)       |
| 13465       | CakSNP13465    | <i>Kabuli</i>    | Ca_Kabuli_Chr08              | 2052263                        | (T/G)       |
| 13466       | CakSNP13466    | <i>Kabuli</i>    | Ca_Kabuli_Chr08              | 2052286                        | (T/C)       |
| 13467       | CakSNP13467    | <i>Kabuli</i>    | Ca_Kabuli_Chr08              | 2070694                        | (G/T)       |
| 13468       | CakSNP13468    | <i>Kabuli</i>    | Ca_Kabuli_Chr08              | 2073807                        | (C/G)       |
| 13469       | CakSNP13469    | <i>Kabuli</i>    | Ca_Kabuli_Chr08              | 2074619                        | (T/G)       |
| 13470       | CakSNP13470    | <i>Kabuli</i>    | Ca_Kabuli_Chr08              | 2075296                        | (T/C)       |
| 13471       | CakSNP13471    | <i>Kabuli</i>    | Ca_Kabuli_Chr08              | 2075290                        | (G/T)       |
| 13472       | CakSNP13472    | <i>Kabuli</i>    | Ca_Kabuli_Chr08              | 2075278                        | (T/G)       |
| 13473       | CakSNP13473    | <i>Kabuli</i>    | Ca_Kabuli_Chr08              | 2079723                        | (A/G)       |
| 13474       | CakSNP13474    | <i>Kabuli</i>    | Ca_Kabuli_Chr08              | 2081228                        | (C/T)       |
| 13475       | CakSNP13475    | <i>Kabuli</i>    | Ca_Kabuli_Chr08              | 2088903                        | (T/C)       |
| 13476       | CakSNP13476    | <i>Kabuli</i>    | Ca_Kabuli_Chr08              | 2088892                        | (T/G)       |
| 13477       | CakSNP13477    | <i>Kabuli</i>    | Ca_Kabuli_Chr08              | 2090852                        | (A/G)       |
| 13478       | CakSNP13478    | <i>Kabuli</i>    | Ca_Kabuli_Chr08              | 2095607                        | (A/G)       |
| 13479       | CakSNP13479    | <i>Kabuli</i>    | Ca_Kabuli_Chr08              | 2107370                        | (C/T)       |
| 13480       | CakSNP13480    | <i>Kabuli</i>    | Ca_Kabuli_Chr08              | 2113823                        | (T/G)       |
| 13481       | CakSNP13481    | <i>Kabuli</i>    | Ca_Kabuli_Chr08              | 2113816                        | (T/C)       |
| 13482       | CakSNP13482    | <i>Kabuli</i>    | Ca_Kabuli_Chr08              | 2128450                        | (A/G)       |
| 13483       | CakSNP13483    | <i>Kabuli</i>    | Ca_Kabuli_Chr08              | 2194927                        | (G/A)       |
| 13484       | CakSNP13484    | <i>Kabuli</i>    | Ca_Kabuli_Chr08              | 2194898                        | (A/T)       |
| 13485       | CakSNP13485    | <i>Kabuli</i>    | Ca_Kabuli_Chr08              | 2250195                        | (C/G)       |
| 13486       | CakSNP13486    | <i>Kabuli</i>    | Ca_Kabuli_Chr08              | 2250148                        | (T/C)       |
| 13487       | CakSNP13487    | <i>Kabuli</i>    | Ca_Kabuli_Chr08              | 2264108                        | (G/A)       |
| 13488       | CakSNP13488    | <i>Kabuli</i>    | Ca_Kabuli_Chr08              | 2279413                        | (G/A)       |
| 13489       | CakSNP13489    | <i>Kabuli</i>    | Ca_Kabuli_Chr08              | 2309552                        | (C/G)       |

| <b>S.N.</b> | <b>SNP IDs</b> | <b>Cultivars</b> | <b>Chromosomes/scaffolds</b> | <b>Physical positions (bp)</b> | <b>SNPs</b> |
|-------------|----------------|------------------|------------------------------|--------------------------------|-------------|
| 13490       | CakSNP13490    | <i>Kabuli</i>    | Ca_Kabuli_Chr08              | 2309549                        | (A/G)       |
| 13491       | CakSNP13491    | <i>Kabuli</i>    | Ca_Kabuli_Chr08              | 2413731                        | (A/G)       |
| 13492       | CakSNP13492    | <i>Kabuli</i>    | Ca_Kabuli_Chr08              | 2456352                        | (T/C)       |
| 13493       | CakSNP13493    | <i>Kabuli</i>    | Ca_Kabuli_Chr08              | 2482834                        | (A/G)       |
| 13494       | CakSNP13494    | <i>Kabuli</i>    | Ca_Kabuli_Chr08              | 2482849                        | (T/C)       |
| 13495       | CakSNP13495    | <i>Kabuli</i>    | Ca_Kabuli_Chr08              | 2483021                        | (G/A)       |
| 13496       | CakSNP13496    | <i>Kabuli</i>    | Ca_Kabuli_Chr08              | 2488709                        | (A/G)       |
| 13497       | CakSNP13497    | <i>Kabuli</i>    | Ca_Kabuli_Chr08              | 2488769                        | (C/G)       |
| 13498       | CakSNP13498    | <i>Kabuli</i>    | Ca_Kabuli_Chr08              | 2488772                        | (A/G)       |
| 13499       | CakSNP13499    | <i>Kabuli</i>    | Ca_Kabuli_Chr08              | 2515612                        | (A/G)       |
| 13500       | CakSNP13500    | <i>Kabuli</i>    | Ca_Kabuli_Chr08              | 2524188                        | (A/G)       |
| 13501       | CakSNP13501    | <i>Kabuli</i>    | Ca_Kabuli_Chr08              | 2524148                        | (A/G)       |
| 13502       | CakSNP13502    | <i>Kabuli</i>    | Ca_Kabuli_Chr08              | 2539375                        | (G/A)       |
| 13503       | CakSNP13503    | <i>Kabuli</i>    | Ca_Kabuli_Chr08              | 2540644                        | (G/A)       |
| 13504       | CakSNP13504    | <i>Kabuli</i>    | Ca_Kabuli_Chr08              | 2540704                        | (A/T)       |
| 13505       | CakSNP13505    | <i>Kabuli</i>    | Ca_Kabuli_Chr08              | 2543156                        | (A/G)       |
| 13506       | CakSNP13506    | <i>Kabuli</i>    | Ca_Kabuli_Chr08              | 2545070                        | (T/A)       |
| 13507       | CakSNP13507    | <i>Kabuli</i>    | Ca_Kabuli_Chr08              | 2604759                        | (C/T)       |
| 13508       | CakSNP13508    | <i>Kabuli</i>    | Ca_Kabuli_Chr08              | 2605423                        | (A/T)       |
| 13509       | CakSNP13509    | <i>Kabuli</i>    | Ca_Kabuli_Chr08              | 2605460                        | (C/T)       |
| 13510       | CakSNP13510    | <i>Kabuli</i>    | Ca_Kabuli_Chr08              | 2621132                        | (T/A)       |
| 13511       | CakSNP13511    | <i>Kabuli</i>    | Ca_Kabuli_Chr08              | 2622009                        | (G/T)       |
| 13512       | CakSNP13512    | <i>Kabuli</i>    | Ca_Kabuli_Chr08              | 2621987                        | (C/G)       |
| 13513       | CakSNP13513    | <i>Kabuli</i>    | Ca_Kabuli_Chr08              | 2621973                        | (T/G)       |
| 13514       | CakSNP13514    | <i>Kabuli</i>    | Ca_Kabuli_Chr08              | 2651439                        | (G/T)       |
| 13515       | CakSNP13515    | <i>Kabuli</i>    | Ca_Kabuli_Chr08              | 2651425                        | (C/T)       |
| 13516       | CakSNP13516    | <i>Kabuli</i>    | Ca_Kabuli_Chr08              | 2651422                        | (T/C)       |
| 13517       | CakSNP13517    | <i>Kabuli</i>    | Ca_Kabuli_Chr08              | 2651393                        | (G/T)       |
| 13518       | CakSNP13518    | <i>Kabuli</i>    | Ca_Kabuli_Chr08              | 2651373                        | (G/T)       |
| 13519       | CakSNP13519    | <i>Kabuli</i>    | Ca_Kabuli_Chr08              | 2651921                        | (C/T)       |
| 13520       | CakSNP13520    | <i>Kabuli</i>    | Ca_Kabuli_Chr08              | 2664625                        | (T/C)       |
| 13521       | CakSNP13521    | <i>Kabuli</i>    | Ca_Kabuli_Chr08              | 2664711                        | (T/G)       |
| 13522       | CakSNP13522    | <i>Kabuli</i>    | Ca_Kabuli_Chr08              | 2722673                        | (C/A)       |
| 13523       | CakSNP13523    | <i>Kabuli</i>    | Ca_Kabuli_Chr08              | 2735849                        | (T/C)       |
| 13524       | CakSNP13524    | <i>Kabuli</i>    | Ca_Kabuli_Chr08              | 2743075                        | (T/C)       |
| 13525       | CakSNP13525    | <i>Kabuli</i>    | Ca_Kabuli_Chr08              | 2743088                        | (A/G)       |
| 13526       | CakSNP13526    | <i>Kabuli</i>    | Ca_Kabuli_Chr08              | 2743109                        | (G/C)       |
| 13527       | CakSNP13527    | <i>Kabuli</i>    | Ca_Kabuli_Chr08              | 2743139                        | (A/T)       |

| <b>S.N.</b> | <b>SNP IDs</b> | <b>Cultivars</b> | <b>Chromosomes/scaffolds</b> | <b>Physical positions (bp)</b> | <b>SNPs</b> |
|-------------|----------------|------------------|------------------------------|--------------------------------|-------------|
| 13528       | CakSNP13528    | <i>Kabuli</i>    | Ca_Kabuli_Chr08              | 2783576                        | (T/G)       |
| 13529       | CakSNP13529    | <i>Kabuli</i>    | Ca_Kabuli_Chr08              | 2783655                        | (G/C)       |
| 13530       | CakSNP13530    | <i>Kabuli</i>    | Ca_Kabuli_Chr08              | 2827822                        | (C/T)       |
| 13531       | CakSNP13531    | <i>Kabuli</i>    | Ca_Kabuli_Chr08              | 2827984                        | (T/C)       |
| 13532       | CakSNP13532    | <i>Kabuli</i>    | Ca_Kabuli_Chr08              | 2838179                        | (T/A)       |
| 13533       | CakSNP13533    | <i>Kabuli</i>    | Ca_Kabuli_Chr08              | 2871095                        | (G/A)       |
| 13534       | CakSNP13534    | <i>Kabuli</i>    | Ca_Kabuli_Chr08              | 2871064                        | (G/A)       |
| 13535       | CakSNP13535    | <i>Kabuli</i>    | Ca_Kabuli_Chr08              | 2888353                        | (G/T)       |
| 13536       | CakSNP13536    | <i>Kabuli</i>    | Ca_Kabuli_Chr08              | 2888317                        | (G/A)       |
| 13537       | CakSNP13537    | <i>Kabuli</i>    | Ca_Kabuli_Chr08              | 2943631                        | (G/T)       |
| 13538       | CakSNP13538    | <i>Kabuli</i>    | Ca_Kabuli_Chr08              | 2947498                        | (A/G)       |
| 13539       | CakSNP13539    | <i>Kabuli</i>    | Ca_Kabuli_Chr08              | 2974759                        | (G/C)       |
| 13540       | CakSNP13540    | <i>Kabuli</i>    | Ca_Kabuli_Chr08              | 2976709                        | (C/T)       |
| 13541       | CakSNP13541    | <i>Kabuli</i>    | Ca_Kabuli_Chr08              | 2977543                        | (T/C)       |
| 13542       | CakSNP13542    | <i>Kabuli</i>    | Ca_Kabuli_Chr08              | 2977628                        | (C/T)       |
| 13543       | CakSNP13543    | <i>Kabuli</i>    | Ca_Kabuli_Chr08              | 2977603                        | (T/A)       |
| 13544       | CakSNP13544    | <i>Kabuli</i>    | Ca_Kabuli_Chr08              | 3013928                        | (G/C)       |
| 13545       | CakSNP13545    | <i>Kabuli</i>    | Ca_Kabuli_Chr08              | 3013917                        | (G/A)       |
| 13546       | CakSNP13546    | <i>Kabuli</i>    | Ca_Kabuli_Chr08              | 3041947                        | (A/G)       |
| 13547       | CakSNP13547    | <i>Kabuli</i>    | Ca_Kabuli_Chr08              | 3041981                        | (A/G)       |
| 13548       | CakSNP13548    | <i>Kabuli</i>    | Ca_Kabuli_Chr08              | 3050452                        | (T/C)       |
| 13549       | CakSNP13549    | <i>Kabuli</i>    | Ca_Kabuli_Chr08              | 3064477                        | (G/A)       |
| 13550       | CakSNP13550    | <i>Kabuli</i>    | Ca_Kabuli_Chr08              | 3141617                        | (C/T)       |
| 13551       | CakSNP13551    | <i>Kabuli</i>    | Ca_Kabuli_Chr08              | 3171324                        | (C/T)       |
| 13552       | CakSNP13552    | <i>Kabuli</i>    | Ca_Kabuli_Chr08              | 3210879                        | (C/A)       |
| 13553       | CakSNP13553    | <i>Kabuli</i>    | Ca_Kabuli_Chr08              | 3248044                        | (A/G)       |
| 13554       | CakSNP13554    | <i>Kabuli</i>    | Ca_Kabuli_Chr08              | 3248104                        | (A/G)       |
| 13555       | CakSNP13555    | <i>Kabuli</i>    | Ca_Kabuli_Chr08              | 3250707                        | (C/T)       |
| 13556       | CakSNP13556    | <i>Kabuli</i>    | Ca_Kabuli_Chr08              | 3263822                        | (T/C)       |
| 13557       | CakSNP13557    | <i>Kabuli</i>    | Ca_Kabuli_Chr08              | 3269124                        | (G/A)       |
| 13558       | CakSNP13558    | <i>Kabuli</i>    | Ca_Kabuli_Chr08              | 3269118                        | (A/G)       |
| 13559       | CakSNP13559    | <i>Kabuli</i>    | Ca_Kabuli_Chr08              | 3269088                        | (A/C)       |
| 13560       | CakSNP13560    | <i>Kabuli</i>    | Ca_Kabuli_Chr08              | 3269085                        | (A/C)       |
| 13561       | CakSNP13561    | <i>Kabuli</i>    | Ca_Kabuli_Chr08              | 3297410                        | (T/C)       |
| 13562       | CakSNP13562    | <i>Kabuli</i>    | Ca_Kabuli_Chr08              | 3386165                        | (C/A)       |
| 13563       | CakSNP13563    | <i>Kabuli</i>    | Ca_Kabuli_Chr08              | 3386181                        | (C/A)       |
| 13564       | CakSNP13564    | <i>Kabuli</i>    | Ca_Kabuli_Chr08              | 3392929                        | (A/C)       |
| 13565       | CakSNP13565    | <i>Kabuli</i>    | Ca_Kabuli_Chr08              | 3394796                        | (A/C)       |

| <b>S.N.</b> | <b>SNP IDs</b> | <b>Cultivars</b> | <b>Chromosomes/scaffolds</b> | <b>Physical positions (bp)</b> | <b>SNPs</b> |
|-------------|----------------|------------------|------------------------------|--------------------------------|-------------|
| 13566       | CakSNP13566    | <i>Kabuli</i>    | Ca_Kabuli_Chr08              | 3394833                        | (T/C)       |
| 13567       | CakSNP13567    | <i>Kabuli</i>    | Ca_Kabuli_Chr08              | 3394931                        | (T/C)       |
| 13568       | CakSNP13568    | <i>Kabuli</i>    | Ca_Kabuli_Chr08              | 3396820                        | (T/C)       |
| 13569       | CakSNP13569    | <i>Kabuli</i>    | Ca_Kabuli_Chr08              | 3438274                        | (A/T)       |
| 13570       | CakSNP13570    | <i>Kabuli</i>    | Ca_Kabuli_Chr08              | 3445568                        | (G/T)       |
| 13571       | CakSNP13571    | <i>Kabuli</i>    | Ca_Kabuli_Chr08              | 3448194                        | (C/T)       |
| 13572       | CakSNP13572    | <i>Kabuli</i>    | Ca_Kabuli_Chr08              | 3460627                        | (G/A)       |
| 13573       | CakSNP13573    | <i>Kabuli</i>    | Ca_Kabuli_Chr08              | 3499010                        | (G/A)       |
| 13574       | CakSNP13574    | <i>Kabuli</i>    | Ca_Kabuli_Chr08              | 3539690                        | (A/G)       |
| 13575       | CakSNP13575    | <i>Kabuli</i>    | Ca_Kabuli_Chr08              | 3539723                        | (G/C)       |
| 13576       | CakSNP13576    | <i>Kabuli</i>    | Ca_Kabuli_Chr08              | 3539745                        | (T/C)       |
| 13577       | CakSNP13577    | <i>Kabuli</i>    | Ca_Kabuli_Chr08              | 3539851                        | (T/C)       |
| 13578       | CakSNP13578    | <i>Kabuli</i>    | Ca_Kabuli_Chr08              | 3539838                        | (T/G)       |
| 13579       | CakSNP13579    | <i>Kabuli</i>    | Ca_Kabuli_Chr08              | 3539832                        | (T/C)       |
| 13580       | CakSNP13580    | <i>Kabuli</i>    | Ca_Kabuli_Chr08              | 3560271                        | (G/A)       |
| 13581       | CakSNP13581    | <i>Kabuli</i>    | Ca_Kabuli_Chr08              | 3563692                        | (A/C)       |
| 13582       | CakSNP13582    | <i>Kabuli</i>    | Ca_Kabuli_Chr08              | 3563825                        | (G/T)       |
| 13583       | CakSNP13583    | <i>Kabuli</i>    | Ca_Kabuli_Chr08              | 3563824                        | (T/A)       |
| 13584       | CakSNP13584    | <i>Kabuli</i>    | Ca_Kabuli_Chr08              | 3599091                        | (G/C)       |
| 13585       | CakSNP13585    | <i>Kabuli</i>    | Ca_Kabuli_Chr08              | 3601517                        | (T/C)       |
| 13586       | CakSNP13586    | <i>Kabuli</i>    | Ca_Kabuli_Chr08              | 3605513                        | (T/C)       |
| 13587       | CakSNP13587    | <i>Kabuli</i>    | Ca_Kabuli_Chr08              | 3617810                        | (T/C)       |
| 13588       | CakSNP13588    | <i>Kabuli</i>    | Ca_Kabuli_Chr08              | 3617757                        | (G/C)       |
| 13589       | CakSNP13589    | <i>Kabuli</i>    | Ca_Kabuli_Chr08              | 3723085                        | (C/T)       |
| 13590       | CakSNP13590    | <i>Kabuli</i>    | Ca_Kabuli_Chr08              | 3730369                        | (A/C)       |
| 13591       | CakSNP13591    | <i>Kabuli</i>    | Ca_Kabuli_Chr08              | 3775945                        | (G/A)       |
| 13592       | CakSNP13592    | <i>Kabuli</i>    | Ca_Kabuli_Chr08              | 3775960                        | (T/C)       |
| 13593       | CakSNP13593    | <i>Kabuli</i>    | Ca_Kabuli_Chr08              | 3813978                        | (C/T)       |
| 13594       | CakSNP13594    | <i>Kabuli</i>    | Ca_Kabuli_Chr08              | 3829425                        | (C/G)       |
| 13595       | CakSNP13595    | <i>Kabuli</i>    | Ca_Kabuli_Chr08              | 3829576                        | (A/G)       |
| 13596       | CakSNP13596    | <i>Kabuli</i>    | Ca_Kabuli_Chr08              | 3837237                        | (A/G)       |
| 13597       | CakSNP13597    | <i>Kabuli</i>    | Ca_Kabuli_Chr08              | 3837306                        | (G/C)       |
| 13598       | CakSNP13598    | <i>Kabuli</i>    | Ca_Kabuli_Chr08              | 3868511                        | (A/C)       |
| 13599       | CakSNP13599    | <i>Kabuli</i>    | Ca_Kabuli_Chr08              | 3877130                        | (G/T)       |
| 13600       | CakSNP13600    | <i>Kabuli</i>    | Ca_Kabuli_Chr08              | 3877176                        | (T/G)       |
| 13601       | CakSNP13601    | <i>Kabuli</i>    | Ca_Kabuli_Chr08              | 3911930                        | (A/C)       |
| 13602       | CakSNP13602    | <i>Kabuli</i>    | Ca_Kabuli_Chr08              | 3911876                        | (G/C)       |
| 13603       | CakSNP13603    | <i>Kabuli</i>    | Ca_Kabuli_Chr08              | 3951767                        | (C/A)       |



| <b>S.N.</b> | <b>SNP IDs</b> | <b>Cultivars</b> | <b>Chromosomes/scaffolds</b> | <b>Physical positions (bp)</b> | <b>SNPs</b> |
|-------------|----------------|------------------|------------------------------|--------------------------------|-------------|
| 13604       | CakSNP13604    | <i>Kabuli</i>    | Ca_Kabuli_Chr08              | 3951768                        | (A/G)       |
| 13605       | CakSNP13605    | <i>Kabuli</i>    | Ca_Kabuli_Chr08              | 3954853                        | (T/A)       |
| 13606       | CakSNP13606    | <i>Kabuli</i>    | Ca_Kabuli_Chr08              | 4042166                        | (A/C)       |
| 13607       | CakSNP13607    | <i>Kabuli</i>    | Ca_Kabuli_Chr08              | 4042233                        | (G/A)       |
| 13608       | CakSNP13608    | <i>Kabuli</i>    | Ca_Kabuli_Chr08              | 4042424                        | (G/A)       |
| 13609       | CakSNP13609    | <i>Kabuli</i>    | Ca_Kabuli_Chr08              | 4052732                        | (C/T)       |
| 13610       | CakSNP13610    | <i>Kabuli</i>    | Ca_Kabuli_Chr08              | 4052702                        | (C/T)       |
| 13611       | CakSNP13611    | <i>Kabuli</i>    | Ca_Kabuli_Chr08              | 4073528                        | (C/T)       |
| 13612       | CakSNP13612    | <i>Kabuli</i>    | Ca_Kabuli_Chr08              | 4073603                        | (A/G)       |
| 13613       | CakSNP13613    | <i>Kabuli</i>    | Ca_Kabuli_Chr08              | 4074135                        | (T/C)       |
| 13614       | CakSNP13614    | <i>Kabuli</i>    | Ca_Kabuli_Chr08              | 4091946                        | (T/C)       |
| 13615       | CakSNP13615    | <i>Kabuli</i>    | Ca_Kabuli_Chr08              | 4092348                        | (T/A)       |
| 13616       | CakSNP13616    | <i>Kabuli</i>    | Ca_Kabuli_Chr08              | 4092350                        | (G/C)       |
| 13617       | CakSNP13617    | <i>Kabuli</i>    | Ca_Kabuli_Chr08              | 4095131                        | (A/C)       |
| 13618       | CakSNP13618    | <i>Kabuli</i>    | Ca_Kabuli_Chr08              | 4095119                        | (G/A)       |
| 13619       | CakSNP13619    | <i>Kabuli</i>    | Ca_Kabuli_Chr08              | 4106580                        | (T/C)       |
| 13620       | CakSNP13620    | <i>Kabuli</i>    | Ca_Kabuli_Chr08              | 4106583                        | (T/C)       |
| 13621       | CakSNP13621    | <i>Kabuli</i>    | Ca_Kabuli_Chr08              | 4106644                        | (C/T)       |
| 13622       | CakSNP13622    | <i>Kabuli</i>    | Ca_Kabuli_Chr08              | 4172342                        | (A/G)       |
| 13623       | CakSNP13623    | <i>Kabuli</i>    | Ca_Kabuli_Chr08              | 4172368                        | (T/C)       |
| 13624       | CakSNP13624    | <i>Kabuli</i>    | Ca_Kabuli_Chr08              | 4183744                        | (A/G)       |
| 13625       | CakSNP13625    | <i>Kabuli</i>    | Ca_Kabuli_Chr08              | 4183733                        | (G/A)       |
| 13626       | CakSNP13626    | <i>Kabuli</i>    | Ca_Kabuli_Chr08              | 4198214                        | (A/C)       |
| 13627       | CakSNP13627    | <i>Kabuli</i>    | Ca_Kabuli_Chr08              | 4201285                        | (A/G)       |
| 13628       | CakSNP13628    | <i>Kabuli</i>    | Ca_Kabuli_Chr08              | 4237620                        | (T/A)       |
| 13629       | CakSNP13629    | <i>Kabuli</i>    | Ca_Kabuli_Chr08              | 4271620                        | (T/A)       |
| 13630       | CakSNP13630    | <i>Kabuli</i>    | Ca_Kabuli_Chr08              | 4290690                        | (T/A)       |
| 13631       | CakSNP13631    | <i>Kabuli</i>    | Ca_Kabuli_Chr08              | 4322058                        | (A/G)       |
| 13632       | CakSNP13632    | <i>Kabuli</i>    | Ca_Kabuli_Chr08              | 4322202                        | (C/T)       |
| 13633       | CakSNP13633    | <i>Kabuli</i>    | Ca_Kabuli_Chr08              | 4344459                        | (C/A)       |
| 13634       | CakSNP13634    | <i>Kabuli</i>    | Ca_Kabuli_Chr08              | 4346552                        | (A/G)       |
| 13635       | CakSNP13635    | <i>Kabuli</i>    | Ca_Kabuli_Chr08              | 4346749                        | (A/G)       |
| 13636       | CakSNP13636    | <i>Kabuli</i>    | Ca_Kabuli_Chr08              | 4346811                        | (C/T)       |
| 13637       | CakSNP13637    | <i>Kabuli</i>    | Ca_Kabuli_Chr08              | 4346827                        | (A/C)       |
| 13638       | CakSNP13638    | <i>Kabuli</i>    | Ca_Kabuli_Chr08              | 4347535                        | (A/C)       |
| 13639       | CakSNP13639    | <i>Kabuli</i>    | Ca_Kabuli_Chr08              | 4351751                        | (G/A)       |
| 13640       | CakSNP13640    | <i>Kabuli</i>    | Ca_Kabuli_Chr08              | 4353397                        | (A/C)       |
| 13641       | CakSNP13641    | <i>Kabuli</i>    | Ca_Kabuli_Chr08              | 4355388                        | (G/T)       |

| <b>S.N.</b> | <b>SNP IDs</b> | <b>Cultivars</b> | <b>Chromosomes/scaffolds</b> | <b>Physical positions (bp)</b> | <b>SNPs</b> |
|-------------|----------------|------------------|------------------------------|--------------------------------|-------------|
| 13642       | CakSNP13642    | <i>Kabuli</i>    | Ca_Kabuli_Chr08              | 4355531                        | (A/C)       |
| 13643       | CakSNP13643    | <i>Kabuli</i>    | Ca_Kabuli_Chr08              | 4368163                        | (T/C)       |
| 13644       | CakSNP13644    | <i>Kabuli</i>    | Ca_Kabuli_Chr08              | 4368184                        | (T/C)       |
| 13645       | CakSNP13645    | <i>Kabuli</i>    | Ca_Kabuli_Chr08              | 4368213                        | (T/C)       |
| 13646       | CakSNP13646    | <i>Kabuli</i>    | Ca_Kabuli_Chr08              | 4368403                        | (G/A)       |
| 13647       | CakSNP13647    | <i>Kabuli</i>    | Ca_Kabuli_Chr08              | 4368463                        | (A/G)       |
| 13648       | CakSNP13648    | <i>Kabuli</i>    | Ca_Kabuli_Chr08              | 4392707                        | (T/C)       |
| 13649       | CakSNP13649    | <i>Kabuli</i>    | Ca_Kabuli_Chr08              | 4392767                        | (T/G)       |
| 13650       | CakSNP13650    | <i>Kabuli</i>    | Ca_Kabuli_Chr08              | 4392818                        | (C/A)       |
| 13651       | CakSNP13651    | <i>Kabuli</i>    | Ca_Kabuli_Chr08              | 4406956                        | (C/G)       |
| 13652       | CakSNP13652    | <i>Kabuli</i>    | Ca_Kabuli_Chr08              | 4421609                        | (A/G)       |
| 13653       | CakSNP13653    | <i>Kabuli</i>    | Ca_Kabuli_Chr08              | 4421629                        | (T/A)       |
| 13654       | CakSNP13654    | <i>Kabuli</i>    | Ca_Kabuli_Chr08              | 4472423                        | (A/T)       |
| 13655       | CakSNP13655    | <i>Kabuli</i>    | Ca_Kabuli_Chr08              | 4483130                        | (T/C)       |
| 13656       | CakSNP13656    | <i>Kabuli</i>    | Ca_Kabuli_Chr08              | 4483274                        | (T/C)       |
| 13657       | CakSNP13657    | <i>Kabuli</i>    | Ca_Kabuli_Chr08              | 4484606                        | (T/A)       |
| 13658       | CakSNP13658    | <i>Kabuli</i>    | Ca_Kabuli_Chr08              | 4507729                        | (G/T)       |
| 13659       | CakSNP13659    | <i>Kabuli</i>    | Ca_Kabuli_Chr08              | 4510845                        | (C/T)       |
| 13660       | CakSNP13660    | <i>Kabuli</i>    | Ca_Kabuli_Chr08              | 4510810                        | (A/G)       |
| 13661       | CakSNP13661    | <i>Kabuli</i>    | Ca_Kabuli_Chr08              | 4512311                        | (T/C)       |
| 13662       | CakSNP13662    | <i>Kabuli</i>    | Ca_Kabuli_Chr08              | 4512436                        | (G/A)       |
| 13663       | CakSNP13663    | <i>Kabuli</i>    | Ca_Kabuli_Chr08              | 4512492                        | (T/G)       |
| 13664       | CakSNP13664    | <i>Kabuli</i>    | Ca_Kabuli_Chr08              | 4524914                        | (C/T)       |
| 13665       | CakSNP13665    | <i>Kabuli</i>    | Ca_Kabuli_Chr08              | 4557334                        | (A/G)       |
| 13666       | CakSNP13666    | <i>Kabuli</i>    | Ca_Kabuli_Chr08              | 4557328                        | (T/C)       |
| 13667       | CakSNP13667    | <i>Kabuli</i>    | Ca_Kabuli_Chr08              | 4557401                        | (A/C)       |
| 13668       | CakSNP13668    | <i>Kabuli</i>    | Ca_Kabuli_Chr08              | 4557407                        | (A/C)       |
| 13669       | CakSNP13669    | <i>Kabuli</i>    | Ca_Kabuli_Chr08              | 4557440                        | (A/G)       |
| 13670       | CakSNP13670    | <i>Kabuli</i>    | Ca_Kabuli_Chr08              | 4557488                        | (C/T)       |
| 13671       | CakSNP13671    | <i>Kabuli</i>    | Ca_Kabuli_Chr08              | 4580363                        | (C/A)       |
| 13672       | CakSNP13672    | <i>Kabuli</i>    | Ca_Kabuli_Chr08              | 4588869                        | (T/C)       |
| 13673       | CakSNP13673    | <i>Kabuli</i>    | Ca_Kabuli_Chr08              | 4588915                        | (A/C)       |
| 13674       | CakSNP13674    | <i>Kabuli</i>    | Ca_Kabuli_Chr08              | 4611094                        | (C/T)       |
| 13675       | CakSNP13675    | <i>Kabuli</i>    | Ca_Kabuli_Chr08              | 4658502                        | (A/G)       |
| 13676       | CakSNP13676    | <i>Kabuli</i>    | Ca_Kabuli_Chr08              | 4714566                        | (G/A)       |
| 13677       | CakSNP13677    | <i>Kabuli</i>    | Ca_Kabuli_Chr08              | 4744388                        | (C/T)       |
| 13678       | CakSNP13678    | <i>Kabuli</i>    | Ca_Kabuli_Chr08              | 4767567                        | (A/C)       |
| 13679       | CakSNP13679    | <i>Kabuli</i>    | Ca_Kabuli_Chr08              | 4767586                        | (C/G)       |

| <b>S.N.</b> | <b>SNP IDs</b> | <b>Cultivars</b> | <b>Chromosomes/scaffolds</b> | <b>Physical positions (bp)</b> | <b>SNPs</b> |
|-------------|----------------|------------------|------------------------------|--------------------------------|-------------|
| 13680       | CakSNP13680    | <i>Kabuli</i>    | Ca_Kabuli_Chr08              | 4773205                        | (A/C)       |
| 13681       | CakSNP13681    | <i>Kabuli</i>    | Ca_Kabuli_Chr08              | 4810954                        | (A/C)       |
| 13682       | CakSNP13682    | <i>Kabuli</i>    | Ca_Kabuli_Chr08              | 4810968                        | (G/A)       |
| 13683       | CakSNP13683    | <i>Kabuli</i>    | Ca_Kabuli_Chr08              | 4810986                        | (A/C)       |
| 13684       | CakSNP13684    | <i>Kabuli</i>    | Ca_Kabuli_Chr08              | 4858262                        | (C/A)       |
| 13685       | CakSNP13685    | <i>Kabuli</i>    | Ca_Kabuli_Chr08              | 4899964                        | (T/G)       |
| 13686       | CakSNP13686    | <i>Kabuli</i>    | Ca_Kabuli_Chr08              | 4899983                        | (G/A)       |
| 13687       | CakSNP13687    | <i>Kabuli</i>    | Ca_Kabuli_Chr08              | 4980949                        | (A/T)       |
| 13688       | CakSNP13688    | <i>Kabuli</i>    | Ca_Kabuli_Chr08              | 4980916                        | (C/T)       |
| 13689       | CakSNP13689    | <i>Kabuli</i>    | Ca_Kabuli_Chr08              | 5044456                        | (T/C)       |
| 13690       | CakSNP13690    | <i>Kabuli</i>    | Ca_Kabuli_Chr08              | 5044423                        | (T/A)       |
| 13691       | CakSNP13691    | <i>Kabuli</i>    | Ca_Kabuli_Chr08              | 5096194                        | (T/G)       |
| 13692       | CakSNP13692    | <i>Kabuli</i>    | Ca_Kabuli_Chr08              | 5115451                        | (C/G)       |
| 13693       | CakSNP13693    | <i>Kabuli</i>    | Ca_Kabuli_Chr08              | 5115498                        | (A/T)       |
| 13694       | CakSNP13694    | <i>Kabuli</i>    | Ca_Kabuli_Chr08              | 5115512                        | (T/G)       |
| 13695       | CakSNP13695    | <i>Kabuli</i>    | Ca_Kabuli_Chr08              | 5115522                        | (G/C)       |
| 13696       | CakSNP13696    | <i>Kabuli</i>    | Ca_Kabuli_Chr08              | 5134706                        | (A/C)       |
| 13697       | CakSNP13697    | <i>Kabuli</i>    | Ca_Kabuli_Chr08              | 5184227                        | (C/G)       |
| 13698       | CakSNP13698    | <i>Kabuli</i>    | Ca_Kabuli_Chr08              | 5184276                        | (G/A)       |
| 13699       | CakSNP13699    | <i>Kabuli</i>    | Ca_Kabuli_Chr08              | 5197004                        | (G/T)       |
| 13700       | CakSNP13700    | <i>Kabuli</i>    | Ca_Kabuli_Chr08              | 5197254                        | (G/A)       |
| 13701       | CakSNP13701    | <i>Kabuli</i>    | Ca_Kabuli_Chr08              | 5204956                        | (A/G)       |
| 13702       | CakSNP13702    | <i>Kabuli</i>    | Ca_Kabuli_Chr08              | 5313792                        | (T/C)       |
| 13703       | CakSNP13703    | <i>Kabuli</i>    | Ca_Kabuli_Chr08              | 5313782                        | (T/G)       |
| 13704       | CakSNP13704    | <i>Kabuli</i>    | Ca_Kabuli_Chr08              | 5313774                        | (C/G)       |
| 13705       | CakSNP13705    | <i>Kabuli</i>    | Ca_Kabuli_Chr08              | 5313770                        | (A/T)       |
| 13706       | CakSNP13706    | <i>Kabuli</i>    | Ca_Kabuli_Chr08              | 5379556                        | (G/A)       |
| 13707       | CakSNP13707    | <i>Kabuli</i>    | Ca_Kabuli_Chr08              | 5390415                        | (C/T)       |
| 13708       | CakSNP13708    | <i>Kabuli</i>    | Ca_Kabuli_Chr08              | 5390602                        | (T/C)       |
| 13709       | CakSNP13709    | <i>Kabuli</i>    | Ca_Kabuli_Chr08              | 5399503                        | (G/A)       |
| 13710       | CakSNP13710    | <i>Kabuli</i>    | Ca_Kabuli_Chr08              | 5400188                        | (A/G)       |
| 13711       | CakSNP13711    | <i>Kabuli</i>    | Ca_Kabuli_Chr08              | 5412501                        | (A/G)       |
| 13712       | CakSNP13712    | <i>Kabuli</i>    | Ca_Kabuli_Chr08              | 5412489                        | (T/C)       |
| 13713       | CakSNP13713    | <i>Kabuli</i>    | Ca_Kabuli_Chr08              | 5434223                        | (C/T)       |
| 13714       | CakSNP13714    | <i>Kabuli</i>    | Ca_Kabuli_Chr08              | 5434225                        | (G/C)       |
| 13715       | CakSNP13715    | <i>Kabuli</i>    | Ca_Kabuli_Chr08              | 5434232                        | (A/G)       |
| 13716       | CakSNP13716    | <i>Kabuli</i>    | Ca_Kabuli_Chr08              | 5434238                        | (T/G)       |
| 13717       | CakSNP13717    | <i>Kabuli</i>    | Ca_Kabuli_Chr08              | 5434242                        | (T/A)       |

| <b>S.N.</b> | <b>SNP IDs</b> | <b>Cultivars</b> | <b>Chromosomes/scaffolds</b> | <b>Physical positions (bp)</b> | <b>SNPs</b> |
|-------------|----------------|------------------|------------------------------|--------------------------------|-------------|
| 13718       | CakSNP13718    | <i>Kabuli</i>    | Ca_Kabuli_Chr08              | 5487769                        | (G/A)       |
| 13719       | CakSNP13719    | <i>Kabuli</i>    | Ca_Kabuli_Chr08              | 5487830                        | (G/A)       |
| 13720       | CakSNP13720    | <i>Kabuli</i>    | Ca_Kabuli_Chr08              | 5536418                        | (T/G)       |
| 13721       | CakSNP13721    | <i>Kabuli</i>    | Ca_Kabuli_Chr08              | 5538696                        | (A/C)       |
| 13722       | CakSNP13722    | <i>Kabuli</i>    | Ca_Kabuli_Chr08              | 5538695                        | (T/C)       |
| 13723       | CakSNP13723    | <i>Kabuli</i>    | Ca_Kabuli_Chr08              | 5538683                        | (T/C)       |
| 13724       | CakSNP13724    | <i>Kabuli</i>    | Ca_Kabuli_Chr08              | 5539044                        | (C/T)       |
| 13725       | CakSNP13725    | <i>Kabuli</i>    | Ca_Kabuli_Chr08              | 5586106                        | (G/A)       |
| 13726       | CakSNP13726    | <i>Kabuli</i>    | Ca_Kabuli_Chr08              | 5591654                        | (T/C)       |
| 13727       | CakSNP13727    | <i>Kabuli</i>    | Ca_Kabuli_Chr08              | 5591788                        | (G/C)       |
| 13728       | CakSNP13728    | <i>Kabuli</i>    | Ca_Kabuli_Chr08              | 5650080                        | (C/G)       |
| 13729       | CakSNP13729    | <i>Kabuli</i>    | Ca_Kabuli_Chr08              | 5712245                        | (T/A)       |
| 13730       | CakSNP13730    | <i>Kabuli</i>    | Ca_Kabuli_Chr08              | 5811179                        | (G/C)       |
| 13731       | CakSNP13731    | <i>Kabuli</i>    | Ca_Kabuli_Chr08              | 5819008                        | (G/A)       |
| 13732       | CakSNP13732    | <i>Kabuli</i>    | Ca_Kabuli_Chr08              | 5840141                        | (G/A)       |
| 13733       | CakSNP13733    | <i>Kabuli</i>    | Ca_Kabuli_Chr08              | 5870455                        | (A/G)       |
| 13734       | CakSNP13734    | <i>Kabuli</i>    | Ca_Kabuli_Chr08              | 5870664                        | (T/C)       |
| 13735       | CakSNP13735    | <i>Kabuli</i>    | Ca_Kabuli_Chr08              | 5870749                        | (C/T)       |
| 13736       | CakSNP13736    | <i>Kabuli</i>    | Ca_Kabuli_Chr08              | 5871358                        | (G/C)       |
| 13737       | CakSNP13737    | <i>Kabuli</i>    | Ca_Kabuli_Chr08              | 5871361                        | (T/G)       |
| 13738       | CakSNP13738    | <i>Kabuli</i>    | Ca_Kabuli_Chr08              | 5871364                        | (T/C)       |
| 13739       | CakSNP13739    | <i>Kabuli</i>    | Ca_Kabuli_Chr08              | 5871367                        | (T/A)       |
| 13740       | CakSNP13740    | <i>Kabuli</i>    | Ca_Kabuli_Chr08              | 5871421                        | (A/G)       |
| 13741       | CakSNP13741    | <i>Kabuli</i>    | Ca_Kabuli_Chr08              | 5910629                        | (C/G)       |
| 13742       | CakSNP13742    | <i>Kabuli</i>    | Ca_Kabuli_Chr08              | 5927870                        | (G/T)       |
| 13743       | CakSNP13743    | <i>Kabuli</i>    | Ca_Kabuli_Chr08              | 5935435                        | (A/C)       |
| 13744       | CakSNP13744    | <i>Kabuli</i>    | Ca_Kabuli_Chr08              | 5963855                        | (T/A)       |
| 13745       | CakSNP13745    | <i>Kabuli</i>    | Ca_Kabuli_Chr08              | 5992761                        | (A/G)       |
| 13746       | CakSNP13746    | <i>Kabuli</i>    | Ca_Kabuli_Chr08              | 6084594                        | (G/A)       |
| 13747       | CakSNP13747    | <i>Kabuli</i>    | Ca_Kabuli_Chr08              | 6084591                        | (C/T)       |
| 13748       | CakSNP13748    | <i>Kabuli</i>    | Ca_Kabuli_Chr08              | 6115961                        | (T/G)       |
| 13749       | CakSNP13749    | <i>Kabuli</i>    | Ca_Kabuli_Chr08              | 6115965                        | (T/C)       |
| 13750       | CakSNP13750    | <i>Kabuli</i>    | Ca_Kabuli_Chr08              | 6116096                        | (C/T)       |
| 13751       | CakSNP13751    | <i>Kabuli</i>    | Ca_Kabuli_Chr08              | 6116097                        | (C/A)       |
| 13752       | CakSNP13752    | <i>Kabuli</i>    | Ca_Kabuli_Chr08              | 6116101                        | (G/A)       |
| 13753       | CakSNP13753    | <i>Kabuli</i>    | Ca_Kabuli_Chr08              | 6145326                        | (G/A)       |
| 13754       | CakSNP13754    | <i>Kabuli</i>    | Ca_Kabuli_Chr08              | 6149097                        | (A/C)       |
| 13755       | CakSNP13755    | <i>Kabuli</i>    | Ca_Kabuli_Chr08              | 6192944                        | (T/G)       |

| <b>S.N.</b> | <b>SNP IDs</b> | <b>Cultivars</b> | <b>Chromosomes/scaffolds</b> | <b>Physical positions (bp)</b> | <b>SNPs</b> |
|-------------|----------------|------------------|------------------------------|--------------------------------|-------------|
| 13756       | CakSNP13756    | <i>Kabuli</i>    | Ca_Kabuli_Chr08              | 6192986                        | (C/T)       |
| 13757       | CakSNP13757    | <i>Kabuli</i>    | Ca_Kabuli_Chr08              | 6193078                        | (G/A)       |
| 13758       | CakSNP13758    | <i>Kabuli</i>    | Ca_Kabuli_Chr08              | 6218250                        | (G/A)       |
| 13759       | CakSNP13759    | <i>Kabuli</i>    | Ca_Kabuli_Chr08              | 6218275                        | (C/T)       |
| 13760       | CakSNP13760    | <i>Kabuli</i>    | Ca_Kabuli_Chr08              | 6218298                        | (A/G)       |
| 13761       | CakSNP13761    | <i>Kabuli</i>    | Ca_Kabuli_Chr08              | 6218299                        | (T/A)       |
| 13762       | CakSNP13762    | <i>Kabuli</i>    | Ca_Kabuli_Chr08              | 6266432                        | (A/G)       |
| 13763       | CakSNP13763    | <i>Kabuli</i>    | Ca_Kabuli_Chr08              | 6372236                        | (A/T)       |
| 13764       | CakSNP13764    | <i>Kabuli</i>    | Ca_Kabuli_Chr08              | 6372230                        | (G/A)       |
| 13765       | CakSNP13765    | <i>Kabuli</i>    | Ca_Kabuli_Chr08              | 6372223                        | (G/A)       |
| 13766       | CakSNP13766    | <i>Kabuli</i>    | Ca_Kabuli_Chr08              | 6374794                        | (C/A)       |
| 13767       | CakSNP13767    | <i>Kabuli</i>    | Ca_Kabuli_Chr08              | 6437758                        | (T/G)       |
| 13768       | CakSNP13768    | <i>Kabuli</i>    | Ca_Kabuli_Chr08              | 6503723                        | (T/C)       |
| 13769       | CakSNP13769    | <i>Kabuli</i>    | Ca_Kabuli_Chr08              | 6525633                        | (A/T)       |
| 13770       | CakSNP13770    | <i>Kabuli</i>    | Ca_Kabuli_Chr08              | 6526612                        | (T/C)       |
| 13771       | CakSNP13771    | <i>Kabuli</i>    | Ca_Kabuli_Chr08              | 6544248                        | (G/T)       |
| 13772       | CakSNP13772    | <i>Kabuli</i>    | Ca_Kabuli_Chr08              | 6544278                        | (C/A)       |
| 13773       | CakSNP13773    | <i>Kabuli</i>    | Ca_Kabuli_Chr08              | 6624006                        | (C/T)       |
| 13774       | CakSNP13774    | <i>Kabuli</i>    | Ca_Kabuli_Chr08              | 6630663                        | (C/T)       |
| 13775       | CakSNP13775    | <i>Kabuli</i>    | Ca_Kabuli_Chr08              | 6630661                        | (T/C)       |
| 13776       | CakSNP13776    | <i>Kabuli</i>    | Ca_Kabuli_Chr08              | 6664509                        | (T/A)       |
| 13777       | CakSNP13777    | <i>Kabuli</i>    | Ca_Kabuli_Chr08              | 6673855                        | (C/T)       |
| 13778       | CakSNP13778    | <i>Kabuli</i>    | Ca_Kabuli_Chr08              | 6673891                        | (A/G)       |
| 13779       | CakSNP13779    | <i>Kabuli</i>    | Ca_Kabuli_Chr08              | 6674024                        | (G/A)       |
| 13780       | CakSNP13780    | <i>Kabuli</i>    | Ca_Kabuli_Chr08              | 6673956                        | (G/A)       |
| 13781       | CakSNP13781    | <i>Kabuli</i>    | Ca_Kabuli_Chr08              | 6708869                        | (G/T)       |
| 13782       | CakSNP13782    | <i>Kabuli</i>    | Ca_Kabuli_Chr08              | 6708945                        | (A/G)       |
| 13783       | CakSNP13783    | <i>Kabuli</i>    | Ca_Kabuli_Chr08              | 6747091                        | (T/C)       |
| 13784       | CakSNP13784    | <i>Kabuli</i>    | Ca_Kabuli_Chr08              | 6747995                        | (A/G)       |
| 13785       | CakSNP13785    | <i>Kabuli</i>    | Ca_Kabuli_Chr08              | 6748136                        | (C/T)       |
| 13786       | CakSNP13786    | <i>Kabuli</i>    | Ca_Kabuli_Chr08              | 6748294                        | (T/C)       |
| 13787       | CakSNP13787    | <i>Kabuli</i>    | Ca_Kabuli_Chr08              | 6780592                        | (T/G)       |
| 13788       | CakSNP13788    | <i>Kabuli</i>    | Ca_Kabuli_Chr08              | 6940139                        | (A/G)       |
| 13789       | CakSNP13789    | <i>Kabuli</i>    | Ca_Kabuli_Chr08              | 6942651                        | (G/T)       |
| 13790       | CakSNP13790    | <i>Kabuli</i>    | Ca_Kabuli_Chr08              | 6943710                        | (A/G)       |
| 13791       | CakSNP13791    | <i>Kabuli</i>    | Ca_Kabuli_Chr08              | 6968036                        | (A/G)       |
| 13792       | CakSNP13792    | <i>Kabuli</i>    | Ca_Kabuli_Chr08              | 6986090                        | (G/A)       |
| 13793       | CakSNP13793    | <i>Kabuli</i>    | Ca_Kabuli_Chr08              | 6986130                        | (A/G)       |

| <b>S.N.</b> | <b>SNP IDs</b> | <b>Cultivars</b> | <b>Chromosomes/scaffolds</b> | <b>Physical positions (bp)</b> | <b>SNPs</b> |
|-------------|----------------|------------------|------------------------------|--------------------------------|-------------|
| 13794       | CakSNP13794    | <i>Kabuli</i>    | Ca_Kabuli_Chr08              | 6987609                        | (G/T)       |
| 13795       | CakSNP13795    | <i>Kabuli</i>    | Ca_Kabuli_Chr08              | 6987615                        | (A/C)       |
| 13796       | CakSNP13796    | <i>Kabuli</i>    | Ca_Kabuli_Chr08              | 6989342                        | (G/T)       |
| 13797       | CakSNP13797    | <i>Kabuli</i>    | Ca_Kabuli_Chr08              | 6989433                        | (A/G)       |
| 13798       | CakSNP13798    | <i>Kabuli</i>    | Ca_Kabuli_Chr08              | 7013049                        | (G/A)       |
| 13799       | CakSNP13799    | <i>Kabuli</i>    | Ca_Kabuli_Chr08              | 7037715                        | (G/A)       |
| 13800       | CakSNP13800    | <i>Kabuli</i>    | Ca_Kabuli_Chr08              | 7041901                        | (A/C)       |
| 13801       | CakSNP13801    | <i>Kabuli</i>    | Ca_Kabuli_Chr08              | 7047509                        | (T/G)       |
| 13802       | CakSNP13802    | <i>Kabuli</i>    | Ca_Kabuli_Chr08              | 7047469                        | (T/A)       |
| 13803       | CakSNP13803    | <i>Kabuli</i>    | Ca_Kabuli_Chr08              | 7099455                        | (C/T)       |
| 13804       | CakSNP13804    | <i>Kabuli</i>    | Ca_Kabuli_Chr08              | 7099569                        | (T/C)       |
| 13805       | CakSNP13805    | <i>Kabuli</i>    | Ca_Kabuli_Chr08              | 7099530                        | (C/A)       |
| 13806       | CakSNP13806    | <i>Kabuli</i>    | Ca_Kabuli_Chr08              | 7099756                        | (A/G)       |
| 13807       | CakSNP13807    | <i>Kabuli</i>    | Ca_Kabuli_Chr08              | 7162826                        | (T/G)       |
| 13808       | CakSNP13808    | <i>Kabuli</i>    | Ca_Kabuli_Chr08              | 7162976                        | (A/G)       |
| 13809       | CakSNP13809    | <i>Kabuli</i>    | Ca_Kabuli_Chr08              | 7174066                        | (C/T)       |
| 13810       | CakSNP13810    | <i>Kabuli</i>    | Ca_Kabuli_Chr08              | 7175086                        | (A/C)       |
| 13811       | CakSNP13811    | <i>Kabuli</i>    | Ca_Kabuli_Chr08              | 7191825                        | (A/G)       |
| 13812       | CakSNP13812    | <i>Kabuli</i>    | Ca_Kabuli_Chr08              | 7193946                        | (C/T)       |
| 13813       | CakSNP13813    | <i>Kabuli</i>    | Ca_Kabuli_Chr08              | 7193960                        | (A/T)       |
| 13814       | CakSNP13814    | <i>Kabuli</i>    | Ca_Kabuli_Chr08              | 7295151                        | (T/C)       |
| 13815       | CakSNP13815    | <i>Kabuli</i>    | Ca_Kabuli_Chr08              | 7295206                        | (A/G)       |
| 13816       | CakSNP13816    | <i>Kabuli</i>    | Ca_Kabuli_Chr08              | 7295177                        | (G/T)       |
| 13817       | CakSNP13817    | <i>Kabuli</i>    | Ca_Kabuli_Chr08              | 7307737                        | (G/T)       |
| 13818       | CakSNP13818    | <i>Kabuli</i>    | Ca_Kabuli_Chr08              | 7307787                        | (A/T)       |
| 13819       | CakSNP13819    | <i>Kabuli</i>    | Ca_Kabuli_Chr08              | 7357621                        | (A/G)       |
| 13820       | CakSNP13820    | <i>Kabuli</i>    | Ca_Kabuli_Chr08              | 7357583                        | (T/C)       |
| 13821       | CakSNP13821    | <i>Kabuli</i>    | Ca_Kabuli_Chr08              | 7503013                        | (T/A)       |
| 13822       | CakSNP13822    | <i>Kabuli</i>    | Ca_Kabuli_Chr08              | 7503010                        | (T/C)       |
| 13823       | CakSNP13823    | <i>Kabuli</i>    | Ca_Kabuli_Chr08              | 7506004                        | (A/G)       |
| 13824       | CakSNP13824    | <i>Kabuli</i>    | Ca_Kabuli_Chr08              | 7519758                        | (C/A)       |
| 13825       | CakSNP13825    | <i>Kabuli</i>    | Ca_Kabuli_Chr08              | 7519815                        | (G/A)       |
| 13826       | CakSNP13826    | <i>Kabuli</i>    | Ca_Kabuli_Chr08              | 7526956                        | (A/G)       |
| 13827       | CakSNP13827    | <i>Kabuli</i>    | Ca_Kabuli_Chr08              | 7563385                        | (C/G)       |
| 13828       | CakSNP13828    | <i>Kabuli</i>    | Ca_Kabuli_Chr08              | 7563370                        | (T/C)       |
| 13829       | CakSNP13829    | <i>Kabuli</i>    | Ca_Kabuli_Chr08              | 7563373                        | (T/A)       |
| 13830       | CakSNP13830    | <i>Kabuli</i>    | Ca_Kabuli_Chr08              | 7566548                        | (T/C)       |
| 13831       | CakSNP13831    | <i>Kabuli</i>    | Ca_Kabuli_Chr08              | 7614202                        | (A/C)       |

| <b>S.N.</b> | <b>SNP IDs</b> | <b>Cultivars</b> | <b>Chromosomes/scaffolds</b> | <b>Physical positions (bp)</b> | <b>SNPs</b> |
|-------------|----------------|------------------|------------------------------|--------------------------------|-------------|
| 13832       | CakSNP13832    | <i>Kabuli</i>    | Ca_Kabuli_Chr08              | 7628690                        | (T/A)       |
| 13833       | CakSNP13833    | <i>Kabuli</i>    | Ca_Kabuli_Chr08              | 7665291                        | (T/C)       |
| 13834       | CakSNP13834    | <i>Kabuli</i>    | Ca_Kabuli_Chr08              | 7665383                        | (G/T)       |
| 13835       | CakSNP13835    | <i>Kabuli</i>    | Ca_Kabuli_Chr08              | 7694747                        | (A/G)       |
| 13836       | CakSNP13836    | <i>Kabuli</i>    | Ca_Kabuli_Chr08              | 7695990                        | (A/T)       |
| 13837       | CakSNP13837    | <i>Kabuli</i>    | Ca_Kabuli_Chr08              | 7695989                        | (T/A)       |
| 13838       | CakSNP13838    | <i>Kabuli</i>    | Ca_Kabuli_Chr08              | 7697886                        | (G/C)       |
| 13839       | CakSNP13839    | <i>Kabuli</i>    | Ca_Kabuli_Chr08              | 7726921                        | (G/A)       |
| 13840       | CakSNP13840    | <i>Kabuli</i>    | Ca_Kabuli_Chr08              | 7726894                        | (G/T)       |
| 13841       | CakSNP13841    | <i>Kabuli</i>    | Ca_Kabuli_Chr08              | 7726879                        | (A/G)       |
| 13842       | CakSNP13842    | <i>Kabuli</i>    | Ca_Kabuli_Chr08              | 7728085                        | (T/G)       |
| 13843       | CakSNP13843    | <i>Kabuli</i>    | Ca_Kabuli_Chr08              | 7728076                        | (T/C)       |
| 13844       | CakSNP13844    | <i>Kabuli</i>    | Ca_Kabuli_Chr08              | 7729693                        | (T/C)       |
| 13845       | CakSNP13845    | <i>Kabuli</i>    | Ca_Kabuli_Chr08              | 7733508                        | (C/T)       |
| 13846       | CakSNP13846    | <i>Kabuli</i>    | Ca_Kabuli_Chr08              | 7733573                        | (A/C)       |
| 13847       | CakSNP13847    | <i>Kabuli</i>    | Ca_Kabuli_Chr08              | 7733574                        | (G/A)       |
| 13848       | CakSNP13848    | <i>Kabuli</i>    | Ca_Kabuli_Chr08              | 7733670                        | (C/T)       |
| 13849       | CakSNP13849    | <i>Kabuli</i>    | Ca_Kabuli_Chr08              | 7733647                        | (G/T)       |
| 13850       | CakSNP13850    | <i>Kabuli</i>    | Ca_Kabuli_Chr08              | 7776466                        | (G/A)       |
| 13851       | CakSNP13851    | <i>Kabuli</i>    | Ca_Kabuli_Chr08              | 7776592                        | (T/C)       |
| 13852       | CakSNP13852    | <i>Kabuli</i>    | Ca_Kabuli_Chr08              | 7776897                        | (A/T)       |
| 13853       | CakSNP13853    | <i>Kabuli</i>    | Ca_Kabuli_Chr08              | 7776934                        | (G/T)       |
| 13854       | CakSNP13854    | <i>Kabuli</i>    | Ca_Kabuli_Chr08              | 7776970                        | (T/G)       |
| 13855       | CakSNP13855    | <i>Kabuli</i>    | Ca_Kabuli_Chr08              | 7777023                        | (G/A)       |
| 13856       | CakSNP13856    | <i>Kabuli</i>    | Ca_Kabuli_Chr08              | 7807065                        | (T/C)       |
| 13857       | CakSNP13857    | <i>Kabuli</i>    | Ca_Kabuli_Chr08              | 7978269                        | (C/T)       |
| 13858       | CakSNP13858    | <i>Kabuli</i>    | Ca_Kabuli_Chr08              | 8029283                        | (T/A)       |
| 13859       | CakSNP13859    | <i>Kabuli</i>    | Ca_Kabuli_Chr08              | 8039078                        | (A/T)       |
| 13860       | CakSNP13860    | <i>Kabuli</i>    | Ca_Kabuli_Chr08              | 8059732                        | (A/G)       |
| 13861       | CakSNP13861    | <i>Kabuli</i>    | Ca_Kabuli_Chr08              | 8066006                        | (C/A)       |
| 13862       | CakSNP13862    | <i>Kabuli</i>    | Ca_Kabuli_Chr08              | 8066005                        | (A/G)       |
| 13863       | CakSNP13863    | <i>Kabuli</i>    | Ca_Kabuli_Chr08              | 8104804                        | (G/T)       |
| 13864       | CakSNP13864    | <i>Kabuli</i>    | Ca_Kabuli_Chr08              | 8104801                        | (T/C)       |
| 13865       | CakSNP13865    | <i>Kabuli</i>    | Ca_Kabuli_Chr08              | 8104884                        | (T/A)       |
| 13866       | CakSNP13866    | <i>Kabuli</i>    | Ca_Kabuli_Chr08              | 8104892                        | (C/T)       |
| 13867       | CakSNP13867    | <i>Kabuli</i>    | Ca_Kabuli_Chr08              | 8106804                        | (A/G)       |
| 13868       | CakSNP13868    | <i>Kabuli</i>    | Ca_Kabuli_Chr08              | 8106851                        | (G/A)       |
| 13869       | CakSNP13869    | <i>Kabuli</i>    | Ca_Kabuli_Chr08              | 8114316                        | (A/C)       |

| <b>S.N.</b> | <b>SNP IDs</b> | <b>Cultivars</b> | <b>Chromosomes/scaffolds</b> | <b>Physical positions (bp)</b> | <b>SNPs</b> |
|-------------|----------------|------------------|------------------------------|--------------------------------|-------------|
| 13870       | CakSNP13870    | <i>Kabuli</i>    | Ca_Kabuli_Chr08              | 8194206                        | (C/T)       |
| 13871       | CakSNP13871    | <i>Kabuli</i>    | Ca_Kabuli_Chr08              | 8194232                        | (C/A)       |
| 13872       | CakSNP13872    | <i>Kabuli</i>    | Ca_Kabuli_Chr08              | 8194234                        | (C/A)       |
| 13873       | CakSNP13873    | <i>Kabuli</i>    | Ca_Kabuli_Chr08              | 8194342                        | (T/C)       |
| 13874       | CakSNP13874    | <i>Kabuli</i>    | Ca_Kabuli_Chr08              | 8194464                        | (A/G)       |
| 13875       | CakSNP13875    | <i>Kabuli</i>    | Ca_Kabuli_Chr08              | 8194436                        | (T/A)       |
| 13876       | CakSNP13876    | <i>Kabuli</i>    | Ca_Kabuli_Chr08              | 8202726                        | (G/A)       |
| 13877       | CakSNP13877    | <i>Kabuli</i>    | Ca_Kabuli_Chr08              | 8270488                        | (T/C)       |
| 13878       | CakSNP13878    | <i>Kabuli</i>    | Ca_Kabuli_Chr08              | 8288041                        | (A/G)       |
| 13879       | CakSNP13879    | <i>Kabuli</i>    | Ca_Kabuli_Chr08              | 8293716                        | (G/A)       |
| 13880       | CakSNP13880    | <i>Kabuli</i>    | Ca_Kabuli_Chr08              | 8293704                        | (T/C)       |
| 13881       | CakSNP13881    | <i>Kabuli</i>    | Ca_Kabuli_Chr08              | 8293693                        | (T/C)       |
| 13882       | CakSNP13882    | <i>Kabuli</i>    | Ca_Kabuli_Chr08              | 8318110                        | (A/G)       |
| 13883       | CakSNP13883    | <i>Kabuli</i>    | Ca_Kabuli_Chr08              | 8389117                        | (C/T)       |
| 13884       | CakSNP13884    | <i>Kabuli</i>    | Ca_Kabuli_Chr08              | 8458383                        | (G/A)       |
| 13885       | CakSNP13885    | <i>Kabuli</i>    | Ca_Kabuli_Chr08              | 8533479                        | (G/T)       |
| 13886       | CakSNP13886    | <i>Kabuli</i>    | Ca_Kabuli_Chr08              | 8533978                        | (G/A)       |
| 13887       | CakSNP13887    | <i>Kabuli</i>    | Ca_Kabuli_Chr08              | 8560330                        | (C/A)       |
| 13888       | CakSNP13888    | <i>Kabuli</i>    | Ca_Kabuli_Chr08              | 8560331                        | (C/G)       |
| 13889       | CakSNP13889    | <i>Kabuli</i>    | Ca_Kabuli_Chr08              | 8560332                        | (A/C)       |
| 13890       | CakSNP13890    | <i>Kabuli</i>    | Ca_Kabuli_Chr08              | 8560326                        | (G/T)       |
| 13891       | CakSNP13891    | <i>Kabuli</i>    | Ca_Kabuli_Chr08              | 8661327                        | (T/C)       |
| 13892       | CakSNP13892    | <i>Kabuli</i>    | Ca_Kabuli_Chr08              | 8670242                        | (T/G)       |
| 13893       | CakSNP13893    | <i>Kabuli</i>    | Ca_Kabuli_Chr08              | 8772131                        | (C/G)       |
| 13894       | CakSNP13894    | <i>Kabuli</i>    | Ca_Kabuli_Chr08              | 8772124                        | (G/A)       |
| 13895       | CakSNP13895    | <i>Kabuli</i>    | Ca_Kabuli_Chr08              | 8853602                        | (G/A)       |
| 13896       | CakSNP13896    | <i>Kabuli</i>    | Ca_Kabuli_Chr08              | 8853664                        | (A/G)       |
| 13897       | CakSNP13897    | <i>Kabuli</i>    | Ca_Kabuli_Chr08              | 8856046                        | (C/T)       |
| 13898       | CakSNP13898    | <i>Kabuli</i>    | Ca_Kabuli_Chr08              | 8856047                        | (C/T)       |
| 13899       | CakSNP13899    | <i>Kabuli</i>    | Ca_Kabuli_Chr08              | 8856150                        | (A/G)       |
| 13900       | CakSNP13900    | <i>Kabuli</i>    | Ca_Kabuli_Chr08              | 8856143                        | (G/A)       |
| 13901       | CakSNP13901    | <i>Kabuli</i>    | Ca_Kabuli_Chr08              | 8864079                        | (C/T)       |
| 13902       | CakSNP13902    | <i>Kabuli</i>    | Ca_Kabuli_Chr08              | 8864157                        | (G/A)       |
| 13903       | CakSNP13903    | <i>Kabuli</i>    | Ca_Kabuli_Chr08              | 8888412                        | (A/G)       |
| 13904       | CakSNP13904    | <i>Kabuli</i>    | Ca_Kabuli_Chr08              | 8888414                        | (G/T)       |
| 13905       | CakSNP13905    | <i>Kabuli</i>    | Ca_Kabuli_Chr08              | 8888426                        | (T/C)       |
| 13906       | CakSNP13906    | <i>Kabuli</i>    | Ca_Kabuli_Chr08              | 8888476                        | (A/C)       |
| 13907       | CakSNP13907    | <i>Kabuli</i>    | Ca_Kabuli_Chr08              | 8904346                        | (C/A)       |



| <b>S.N.</b> | <b>SNP IDs</b> | <b>Cultivars</b> | <b>Chromosomes/scaffolds</b> | <b>Physical positions (bp)</b> | <b>SNPs</b> |
|-------------|----------------|------------------|------------------------------|--------------------------------|-------------|
| 13908       | CakSNP13908    | <i>Kabuli</i>    | Ca_Kabuli_Chr08              | 8904366                        | (A/G)       |
| 13909       | CakSNP13909    | <i>Kabuli</i>    | Ca_Kabuli_Chr08              | 8914018                        | (A/C)       |
| 13910       | CakSNP13910    | <i>Kabuli</i>    | Ca_Kabuli_Chr08              | 9097585                        | (A/C)       |
| 13911       | CakSNP13911    | <i>Kabuli</i>    | Ca_Kabuli_Chr08              | 9099798                        | (G/T)       |
| 13912       | CakSNP13912    | <i>Kabuli</i>    | Ca_Kabuli_Chr08              | 9100111                        | (C/T)       |
| 13913       | CakSNP13913    | <i>Kabuli</i>    | Ca_Kabuli_Chr08              | 9109896                        | (T/A)       |
| 13914       | CakSNP13914    | <i>Kabuli</i>    | Ca_Kabuli_Chr08              | 9109907                        | (A/T)       |
| 13915       | CakSNP13915    | <i>Kabuli</i>    | Ca_Kabuli_Chr08              | 9109920                        | (C/A)       |
| 13916       | CakSNP13916    | <i>Kabuli</i>    | Ca_Kabuli_Chr08              | 9112178                        | (G/A)       |
| 13917       | CakSNP13917    | <i>Kabuli</i>    | Ca_Kabuli_Chr08              | 9112172                        | (A/C)       |
| 13918       | CakSNP13918    | <i>Kabuli</i>    | Ca_Kabuli_Chr08              | 9118582                        | (C/T)       |
| 13919       | CakSNP13919    | <i>Kabuli</i>    | Ca_Kabuli_Chr08              | 9118667                        | (A/G)       |
| 13920       | CakSNP13920    | <i>Kabuli</i>    | Ca_Kabuli_Chr08              | 9143840                        | (C/A)       |
| 13921       | CakSNP13921    | <i>Kabuli</i>    | Ca_Kabuli_Chr08              | 9151722                        | (G/T)       |
| 13922       | CakSNP13922    | <i>Kabuli</i>    | Ca_Kabuli_Chr08              | 9389347                        | (G/A)       |
| 13923       | CakSNP13923    | <i>Kabuli</i>    | Ca_Kabuli_Chr08              | 10004481                       | (T/C)       |
| 13924       | CakSNP13924    | <i>Kabuli</i>    | Ca_Kabuli_Chr08              | 10155981                       | (A/C)       |
| 13925       | CakSNP13925    | <i>Kabuli</i>    | Ca_Kabuli_Chr08              | 10258892                       | (T/G)       |
| 13926       | CakSNP13926    | <i>Kabuli</i>    | Ca_Kabuli_Chr08              | 10486601                       | (A/C)       |
| 13927       | CakSNP13927    | <i>Kabuli</i>    | Ca_Kabuli_Chr08              | 10556124                       | (T/C)       |
| 13928       | CakSNP13928    | <i>Kabuli</i>    | Ca_Kabuli_Chr08              | 10668422                       | (A/C)       |
| 13929       | CakSNP13929    | <i>Kabuli</i>    | Ca_Kabuli_Chr08              | 10728369                       | (G/C)       |
| 13930       | CakSNP13930    | <i>Kabuli</i>    | Ca_Kabuli_Chr08              | 10733404                       | (A/G)       |
| 13931       | CakSNP13931    | <i>Kabuli</i>    | Ca_Kabuli_Chr08              | 10733503                       | (C/T)       |
| 13932       | CakSNP13932    | <i>Kabuli</i>    | Ca_Kabuli_Chr08              | 10733661                       | (G/A)       |
| 13933       | CakSNP13933    | <i>Kabuli</i>    | Ca_Kabuli_Chr08              | 10733747                       | (C/T)       |
| 13934       | CakSNP13934    | <i>Kabuli</i>    | Ca_Kabuli_Chr08              | 10759078                       | (G/A)       |
| 13935       | CakSNP13935    | <i>Kabuli</i>    | Ca_Kabuli_Chr08              | 10759060                       | (G/A)       |
| 13936       | CakSNP13936    | <i>Kabuli</i>    | Ca_Kabuli_Chr08              | 10759056                       | (C/T)       |
| 13937       | CakSNP13937    | <i>Kabuli</i>    | Ca_Kabuli_Chr08              | 10759102                       | (C/T)       |
| 13938       | CakSNP13938    | <i>Kabuli</i>    | Ca_Kabuli_Chr08              | 10763656                       | (A/T)       |
| 13939       | CakSNP13939    | <i>Kabuli</i>    | Ca_Kabuli_Chr08              | 10953767                       | (C/T)       |
| 13940       | CakSNP13940    | <i>Kabuli</i>    | Ca_Kabuli_Chr08              | 11015680                       | (G/T)       |
| 13941       | CakSNP13941    | <i>Kabuli</i>    | Ca_Kabuli_Chr08              | 11015678                       | (C/G)       |
| 13942       | CakSNP13942    | <i>Kabuli</i>    | Ca_Kabuli_Chr08              | 11015666                       | (G/C)       |
| 13943       | CakSNP13943    | <i>Kabuli</i>    | Ca_Kabuli_Chr08              | 11066644                       | (C/T)       |
| 13944       | CakSNP13944    | <i>Kabuli</i>    | Ca_Kabuli_Chr08              | 11066728                       | (G/A)       |
| 13945       | CakSNP13945    | <i>Kabuli</i>    | Ca_Kabuli_Chr08              | 11087143                       | (A/G)       |

| <b>S.N.</b> | <b>SNP IDs</b> | <b>Cultivars</b> | <b>Chromosomes/scaffolds</b> | <b>Physical positions (bp)</b> | <b>SNPs</b> |
|-------------|----------------|------------------|------------------------------|--------------------------------|-------------|
| 13946       | CakSNP13946    | <i>Kabuli</i>    | Ca_Kabuli_Chr08              | 11087169                       | (C/T)       |
| 13947       | CakSNP13947    | <i>Kabuli</i>    | Ca_Kabuli_Chr08              | 11087302                       | (A/T)       |
| 13948       | CakSNP13948    | <i>Kabuli</i>    | Ca_Kabuli_Chr08              | 11087250                       | (T/C)       |
| 13949       | CakSNP13949    | <i>Kabuli</i>    | Ca_Kabuli_Chr08              | 11087247                       | (T/C)       |
| 13950       | CakSNP13950    | <i>Kabuli</i>    | Ca_Kabuli_Chr08              | 11186919                       | (C/G)       |
| 13951       | CakSNP13951    | <i>Kabuli</i>    | Ca_Kabuli_Chr08              | 11187037                       | (T/C)       |
| 13952       | CakSNP13952    | <i>Kabuli</i>    | Ca_Kabuli_Chr08              | 11186986                       | (A/C)       |
| 13953       | CakSNP13953    | <i>Kabuli</i>    | Ca_Kabuli_Chr08              | 11186974                       | (A/C)       |
| 13954       | CakSNP13954    | <i>Kabuli</i>    | Ca_Kabuli_Chr08              | 11231812                       | (A/G)       |
| 13955       | CakSNP13955    | <i>Kabuli</i>    | Ca_Kabuli_Chr08              | 11240258                       | (C/A)       |
| 13956       | CakSNP13956    | <i>Kabuli</i>    | Ca_Kabuli_Chr08              | 11243263                       | (A/C)       |
| 13957       | CakSNP13957    | <i>Kabuli</i>    | Ca_Kabuli_Chr08              | 11243256                       | (A/C)       |
| 13958       | CakSNP13958    | <i>Kabuli</i>    | Ca_Kabuli_Chr08              | 11266447                       | (G/A)       |
| 13959       | CakSNP13959    | <i>Kabuli</i>    | Ca_Kabuli_Chr08              | 11310460                       | (G/A)       |
| 13960       | CakSNP13960    | <i>Kabuli</i>    | Ca_Kabuli_Chr08              | 11310480                       | (T/A)       |
| 13961       | CakSNP13961    | <i>Kabuli</i>    | Ca_Kabuli_Chr08              | 11332934                       | (C/T)       |
| 13962       | CakSNP13962    | <i>Kabuli</i>    | Ca_Kabuli_Chr08              | 11332940                       | (T/C)       |
| 13963       | CakSNP13963    | <i>Kabuli</i>    | Ca_Kabuli_Chr08              | 11333057                       | (C/G)       |
| 13964       | CakSNP13964    | <i>Kabuli</i>    | Ca_Kabuli_Chr08              | 11334190                       | (A/T)       |
| 13965       | CakSNP13965    | <i>Kabuli</i>    | Ca_Kabuli_Chr08              | 11334210                       | (C/T)       |
| 13966       | CakSNP13966    | <i>Kabuli</i>    | Ca_Kabuli_Chr08              | 11349891                       | (T/A)       |
| 13967       | CakSNP13967    | <i>Kabuli</i>    | Ca_Kabuli_Chr08              | 11349995                       | (A/G)       |
| 13968       | CakSNP13968    | <i>Kabuli</i>    | Ca_Kabuli_Chr08              | 11403805                       | (G/A)       |
| 13969       | CakSNP13969    | <i>Kabuli</i>    | Ca_Kabuli_Chr08              | 11403754                       | (G/A)       |
| 13970       | CakSNP13970    | <i>Kabuli</i>    | Ca_Kabuli_Chr08              | 11562814                       | (A/C)       |
| 13971       | CakSNP13971    | <i>Kabuli</i>    | Ca_Kabuli_Chr08              | 11562833                       | (A/G)       |
| 13972       | CakSNP13972    | <i>Kabuli</i>    | Ca_Kabuli_Chr08              | 11631836                       | (C/T)       |
| 13973       | CakSNP13973    | <i>Kabuli</i>    | Ca_Kabuli_Chr08              | 11656700                       | (G/T)       |
| 13974       | CakSNP13974    | <i>Kabuli</i>    | Ca_Kabuli_Chr08              | 11656687                       | (A/G)       |
| 13975       | CakSNP13975    | <i>Kabuli</i>    | Ca_Kabuli_Chr08              | 11656675                       | (T/C)       |
| 13976       | CakSNP13976    | <i>Kabuli</i>    | Ca_Kabuli_Chr08              | 11656670                       | (A/G)       |
| 13977       | CakSNP13977    | <i>Kabuli</i>    | Ca_Kabuli_Chr08              | 11696021                       | (G/C)       |
| 13978       | CakSNP13978    | <i>Kabuli</i>    | Ca_Kabuli_Chr08              | 11735882                       | (A/C)       |
| 13979       | CakSNP13979    | <i>Kabuli</i>    | Ca_Kabuli_Chr08              | 11962280                       | (T/C)       |
| 13980       | CakSNP13980    | <i>Kabuli</i>    | Ca_Kabuli_Chr08              | 12875217                       | (A/G)       |
| 13981       | CakSNP13981    | <i>Kabuli</i>    | Ca_Kabuli_Chr08              | 13248268                       | (T/C)       |
| 13982       | CakSNP13982    | <i>Kabuli</i>    | Ca_Kabuli_Chr08              | 13745335                       | (A/G)       |
| 13983       | CakSNP13983    | <i>Kabuli</i>    | Ca_Kabuli_Chr08              | 13840865                       | (A/C)       |

| <b>S.N.</b> | <b>SNP IDs</b> | <b>Cultivars</b> | <b>Chromosomes/scaffolds</b> | <b>Physical positions (bp)</b> | <b>SNPs</b> |
|-------------|----------------|------------------|------------------------------|--------------------------------|-------------|
| 13984       | CakSNP13984    | <i>Kabuli</i>    | Ca_Kabuli_Chr08              | 13860922                       | (C/G)       |
| 13985       | CakSNP13985    | <i>Kabuli</i>    | Ca_Kabuli_Chr08              | 13864026                       | (T/G)       |
| 13986       | CakSNP13986    | <i>Kabuli</i>    | Ca_Kabuli_Chr08              | 13864077                       | (T/C)       |
| 13987       | CakSNP13987    | <i>Kabuli</i>    | Ca_Kabuli_Chr08              | 13997385                       | (C/T)       |
| 13988       | CakSNP13988    | <i>Kabuli</i>    | Ca_Kabuli_Chr08              | 13998102                       | (A/G)       |
| 13989       | CakSNP13989    | <i>Kabuli</i>    | Ca_Kabuli_Chr08              | 14006709                       | (G/A)       |
| 13990       | CakSNP13990    | <i>Kabuli</i>    | Ca_Kabuli_Chr08              | 14006694                       | (C/T)       |
| 13991       | CakSNP13991    | <i>Kabuli</i>    | Ca_Kabuli_Chr08              | 14007431                       | (A/G)       |
| 13992       | CakSNP13992    | <i>Kabuli</i>    | Ca_Kabuli_Chr08              | 14124588                       | (C/A)       |
| 13993       | CakSNP13993    | <i>Kabuli</i>    | Ca_Kabuli_Chr08              | 14129040                       | (G/A)       |
| 13994       | CakSNP13994    | <i>Kabuli</i>    | Ca_Kabuli_Chr08              | 14325980                       | (C/A)       |
| 13995       | CakSNP13995    | <i>Kabuli</i>    | Ca_Kabuli_Chr08              | 14437006                       | (C/A)       |
| 13996       | CakSNP13996    | <i>Kabuli</i>    | Ca_Kabuli_Chr08              | 14444424                       | (G/A)       |
| 13997       | CakSNP13997    | <i>Kabuli</i>    | Ca_Kabuli_Chr08              | 14444438                       | (A/C)       |
| 13998       | CakSNP13998    | <i>Kabuli</i>    | Ca_Kabuli_Chr08              | 14445205                       | (C/A)       |
| 13999       | CakSNP13999    | <i>Kabuli</i>    | Ca_Kabuli_Chr08              | 14460426                       | (T/C)       |
| 14000       | CakSNP14000    | <i>Kabuli</i>    | Ca_Kabuli_Chr08              | 14528882                       | (T/G)       |
| 14001       | CakSNP14001    | <i>Kabuli</i>    | Ca_Kabuli_Chr08              | 14528966                       | (C/G)       |
| 14002       | CakSNP14002    | <i>Kabuli</i>    | Ca_Kabuli_Chr08              | 14613302                       | (G/A)       |
| 14003       | CakSNP14003    | <i>Kabuli</i>    | Ca_Kabuli_Chr08              | 14640967                       | (A/C)       |
| 14004       | CakSNP14004    | <i>Kabuli</i>    | Ca_Kabuli_Chr08              | 14715495                       | (T/G)       |
| 14005       | CakSNP14005    | <i>Kabuli</i>    | Ca_Kabuli_Chr08              | 14753763                       | (T/C)       |
| 14006       | CakSNP14006    | <i>Kabuli</i>    | Ca_Kabuli_Chr08              | 14753750                       | (T/C)       |
| 14007       | CakSNP14007    | <i>Kabuli</i>    | Ca_Kabuli_Chr08              | 14754849                       | (A/T)       |
| 14008       | CakSNP14008    | <i>Kabuli</i>    | Ca_Kabuli_Chr08              | 14759784                       | (G/T)       |
| 14009       | CakSNP14009    | <i>Kabuli</i>    | Ca_Kabuli_Chr08              | 14760479                       | (C/G)       |
| 14010       | CakSNP14010    | <i>Kabuli</i>    | Ca_Kabuli_Chr08              | 14760497                       | (G/A)       |
| 14011       | CakSNP14011    | <i>Kabuli</i>    | Ca_Kabuli_Chr08              | 14760503                       | (A/T)       |
| 14012       | CakSNP14012    | <i>Kabuli</i>    | Ca_Kabuli_Chr08              | 14821416                       | (G/A)       |
| 14013       | CakSNP14013    | <i>Kabuli</i>    | Ca_Kabuli_Chr08              | 15000109                       | (A/G)       |
| 14014       | CakSNP14014    | <i>Kabuli</i>    | Ca_Kabuli_Chr08              | 15034465                       | (T/C)       |
| 14015       | CakSNP14015    | <i>Kabuli</i>    | Ca_Kabuli_Chr08              | 15131175                       | (G/A)       |
| 14016       | CakSNP14016    | <i>Kabuli</i>    | Ca_Kabuli_Chr08              | 15192125                       | (A/G)       |
| 14017       | CakSNP14017    | <i>Kabuli</i>    | Ca_Kabuli_Chr08              | 15207944                       | (C/T)       |
| 14018       | CakSNP14018    | <i>Kabuli</i>    | Ca_Kabuli_Chr08              | 15207976                       | (A/G)       |
| 14019       | CakSNP14019    | <i>Kabuli</i>    | Ca_Kabuli_Chr08              | 15220986                       | (C/G)       |
| 14020       | CakSNP14020    | <i>Kabuli</i>    | Ca_Kabuli_Chr08              | 15421764                       | (T/C)       |
| 14021       | CakSNP14021    | <i>Kabuli</i>    | Ca_Kabuli_Chr08              | 15421744                       | (T/G)       |

| <b>S.N.</b> | <b>SNP IDs</b> | <b>Cultivars</b> | <b>Chromosomes/scaffolds</b> | <b>Physical positions (bp)</b> | <b>SNPs</b> |
|-------------|----------------|------------------|------------------------------|--------------------------------|-------------|
| 14022       | CakSNP14022    | <i>Kabuli</i>    | Ca_Kabuli_Chr08              | 15421719                       | (C/G)       |
| 14023       | CakSNP14023    | <i>Kabuli</i>    | Ca_Kabuli_Chr08              | 15422163                       | (A/T)       |
| 14024       | CakSNP14024    | <i>Kabuli</i>    | Ca_Kabuli_Chr08              | 15546669                       | (T/C)       |
| 14025       | CakSNP14025    | <i>Kabuli</i>    | Ca_Kabuli_Chr08              | 15546671                       | (A/C)       |
| 14026       | CakSNP14026    | <i>Kabuli</i>    | Ca_Kabuli_Chr08              | 15546696                       | (C/T)       |
| 14027       | CakSNP14027    | <i>Kabuli</i>    | Ca_Kabuli_Chr08              | 15546710                       | (T/A)       |
| 14028       | CakSNP14028    | <i>Kabuli</i>    | Ca_Kabuli_Chr08              | 15546758                       | (G/C)       |
| 14029       | CakSNP14029    | <i>Kabuli</i>    | Ca_Kabuli_Chr08              | 15553251                       | (A/G)       |
| 14030       | CakSNP14030    | <i>Kabuli</i>    | Ca_Kabuli_Chr08              | 15555771                       | (A/C)       |
| 14031       | CakSNP14031    | <i>Kabuli</i>    | Ca_Kabuli_Chr08              | 15699220                       | (T/A)       |
| 14032       | CakSNP14032    | <i>Kabuli</i>    | Ca_Kabuli_Chr08              | 15699180                       | (T/C)       |
| 14033       | CakSNP14033    | <i>Kabuli</i>    | Ca_Kabuli_Chr08              | 15741863                       | (C/G)       |
| 14034       | CakSNP14034    | <i>Kabuli</i>    | Ca_Kabuli_Chr08              | 15764739                       | (C/T)       |
| 14035       | CakSNP14035    | <i>Kabuli</i>    | Ca_Kabuli_Chr08              | 15764748                       | (G/A)       |
| 14036       | CakSNP14036    | <i>Kabuli</i>    | Ca_Kabuli_Chr08              | 15764823                       | (G/A)       |
| 14037       | CakSNP14037    | <i>Kabuli</i>    | Ca_Kabuli_Chr08              | 15764808                       | (C/A)       |
| 14038       | CakSNP14038    | <i>Kabuli</i>    | Ca_Kabuli_Chr08              | 15764874                       | (G/A)       |
| 14039       | CakSNP14039    | <i>Kabuli</i>    | Ca_Kabuli_Chr08              | 15857176                       | (G/A)       |
| 14040       | CakSNP14040    | <i>Kabuli</i>    | Ca_Kabuli_Chr08              | 15857192                       | (A/G)       |
| 14041       | CakSNP14041    | <i>Kabuli</i>    | Ca_Kabuli_Chr08              | 15857359                       | (T/G)       |
| 14042       | CakSNP14042    | <i>Kabuli</i>    | Ca_Kabuli_Chr08              | 15863509                       | (T/C)       |
| 14043       | CakSNP14043    | <i>Kabuli</i>    | Ca_Kabuli_Chr08              | 15873071                       | (A/C)       |
| 14044       | CakSNP14044    | <i>Kabuli</i>    | Ca_Kabuli_Chr08              | 15873133                       | (A/G)       |
| 14045       | CakSNP14045    | <i>Kabuli</i>    | Ca_Kabuli_Chr08              | 16004976                       | (G/C)       |
| 14046       | CakSNP14046    | <i>Kabuli</i>    | Ca_Kabuli_Chr08              | 16005046                       | (C/T)       |
| 14047       | CakSNP14047    | <i>Kabuli</i>    | Ca_Kabuli_Chr08              | 16005078                       | (A/G)       |
| 14048       | CakSNP14048    | <i>Kabuli</i>    | Ca_Kabuli_Chr08              | 16005235                       | (A/G)       |
| 14049       | CakSNP14049    | <i>Kabuli</i>    | Ca_Kabuli_Chr08              | 16005253                       | (G/A)       |
| 14050       | CakSNP14050    | <i>Kabuli</i>    | Ca_Kabuli_Chr08              | 16020239                       | (C/A)       |
| 14051       | CakSNP14051    | <i>Kabuli</i>    | Ca_Kabuli_Chr08              | 16020277                       | (T/G)       |
| 14052       | CakSNP14052    | <i>Kabuli</i>    | Ca_Kabuli_Chr08              | 16020323                       | (G/T)       |
| 14053       | CakSNP14053    | <i>Kabuli</i>    | Ca_Kabuli_Chr08              | 16020305                       | (G/A)       |
| 14054       | CakSNP14054    | <i>Kabuli</i>    | Ca_Kabuli_Chr08              | 16022432                       | (C/T)       |
| 14055       | CakSNP14055    | <i>Kabuli</i>    | Ca_Kabuli_Chr08              | 16027974                       | (A/T)       |
| 14056       | CakSNP14056    | <i>Kabuli</i>    | Ca_Kabuli_Chr08              | 16028064                       | (G/T)       |
| 14057       | CakSNP14057    | <i>Kabuli</i>    | Ca_Kabuli_Chr08              | 16028062                       | (G/A)       |
| 14058       | CakSNP14058    | <i>Kabuli</i>    | Ca_Kabuli_Chr08              | 16028040                       | (A/G)       |
| 14059       | CakSNP14059    | <i>Kabuli</i>    | Ca_Kabuli_Chr08              | 16033779                       | (T/G)       |

| <b>S.N.</b> | <b>SNP IDs</b> | <b>Cultivars</b> | <b>Chromosomes/scaffolds</b> | <b>Physical positions (bp)</b> | <b>SNPs</b> |
|-------------|----------------|------------------|------------------------------|--------------------------------|-------------|
| 14060       | CakSNP14060    | <i>Kabuli</i>    | Ca_Kabuli_Chr08              | 16076161                       | (C/G)       |
| 14061       | CakSNP14061    | <i>Kabuli</i>    | Ca_Kabuli_Chr08              | 16076168                       | (A/G)       |
| 14062       | CakSNP14062    | <i>Kabuli</i>    | Ca_Kabuli_Chr08              | 16102413                       | (C/T)       |
| 14063       | CakSNP14063    | <i>Kabuli</i>    | Ca_Kabuli_Chr08              | 16102395                       | (G/A)       |
| 14064       | CakSNP14064    | <i>Kabuli</i>    | Ca_Kabuli_Chr08              | 16102363                       | (T/C)       |
| 14065       | CakSNP14065    | <i>Kabuli</i>    | Ca_Kabuli_Chr08              | 16102362                       | (G/T)       |
| 14066       | CakSNP14066    | <i>Kabuli</i>    | Ca_Kabuli_Chr08              | 16102348                       | (A/T)       |
| 14067       | CakSNP14067    | <i>Kabuli</i>    | Ca_Kabuli_Chr08              | 16102343                       | (C/T)       |
| 14068       | CakSNP14068    | <i>Kabuli</i>    | Ca_Kabuli_Chr08              | 16102335                       | (A/T)       |
| 14069       | CakSNP14069    | <i>Kabuli</i>    | Ca_Kabuli_Chr08              | 16102414                       | (G/T)       |
| 14070       | CakSNP14070    | <i>Kabuli</i>    | Ca_Kabuli_Chr08              | 16144279                       | (T/A)       |
| 14071       | CakSNP14071    | <i>Kabuli</i>    | Ca_Kabuli_Chr08              | 16145275                       | (A/G)       |
| 14072       | CakSNP14072    | <i>Kabuli</i>    | Ca_Kabuli_Chr08              | 16145419                       | (A/G)       |
| 14073       | CakSNP14073    | <i>Kabuli</i>    | Ca_Kabuli_Chr08              | 16145411                       | (C/G)       |
| 14074       | CakSNP14074    | <i>Kabuli</i>    | Ca_Kabuli_Chr08              | 16145370                       | (C/A)       |
| 14075       | CakSNP14075    | <i>Kabuli</i>    | Ca_Kabuli_Chr08              | 16157015                       | (C/T)       |
| 14076       | CakSNP14076    | <i>Kabuli</i>    | Ca_Kabuli_Chr08              | 16157134                       | (A/C)       |
| 14077       | CakSNP14077    | <i>Kabuli</i>    | Ca_Kabuli_Chr08              | 16158594                       | (A/C)       |
| 14078       | CakSNP14078    | <i>Kabuli</i>    | Ca_Kabuli_Chr08              | 16264310                       | (G/T)       |
| 14079       | CakSNP14079    | <i>Kabuli</i>    | Ca_Kabuli_Chr08              | 16268878                       | (T/C)       |
| 14080       | CakSNP14080    | <i>Kabuli</i>    | Ca_Kabuli_Chr08              | 16278758                       | (T/C)       |
| 14081       | CakSNP14081    | <i>Kabuli</i>    | Ca_Kabuli_Chr08              | 16283660                       | (C/T)       |
| 14082       | CakSNP14082    | <i>Kabuli</i>    | Ca_Kabuli_Chr08              | 16283661                       | (A/G)       |
| 14083       | CakSNP14083    | <i>Kabuli</i>    | Ca_Kabuli_Chr08              | 16283722                       | (A/G)       |
| 14084       | CakSNP14084    | <i>Kabuli</i>    | Ca_Kabuli_Chr08              | 16283738                       | (G/C)       |
| 14085       | CakSNP14085    | <i>Kabuli</i>    | Ca_Kabuli_Chr08              | 16283859                       | (T/C)       |
| 14086       | CakSNP14086    | <i>Kabuli</i>    | Ca_Kabuli_Chr08              | 16284269                       | (G/A)       |
| 14087       | CakSNP14087    | <i>Kabuli</i>    | Ca_Kabuli_Chr08              | 16284279                       | (A/C)       |
| 14088       | CakSNP14088    | <i>Kabuli</i>    | Ca_Kabuli_Chr08              | 16284306                       | (C/T)       |
| 14089       | CakSNP14089    | <i>Kabuli</i>    | Ca_Kabuli_Chr08              | 16309857                       | (G/T)       |
| 14090       | CakSNP14090    | <i>Kabuli</i>    | Ca_Kabuli_Chr08              | 16321524                       | (A/G)       |
| 14091       | CakSNP14091    | <i>Kabuli</i>    | Ca_Kabuli_Chr08              | 16321545                       | (G/T)       |
| 14092       | CakSNP14092    | <i>Kabuli</i>    | Ca_Kabuli_Chr08              | 16366490                       | (G/A)       |
| 14093       | CakSNP14093    | <i>Kabuli</i>    | Ca_Kabuli_Chr08              | 16381928                       | (T/G)       |
| 14094       | CakSNP14094    | <i>Kabuli</i>    | Ca_Kabuli_Chr08              | 16411550                       | (A/G)       |
| 14095       | CakSNP14095    | <i>Kabuli</i>    | Ca_Kabuli_Chr08              | 16412672                       | (T/C)       |
| 14096       | CakSNP14096    | <i>Kabuli</i>    | Ca_Kabuli_Chr08              | 16421407                       | (G/A)       |
| 14097       | CakSNP14097    | <i>Kabuli</i>    | Ca_Kabuli_Chr08              | 16421441                       | (C/A)       |

| <b>S.N.</b> | <b>SNP IDs</b> | <b>Cultivars</b> | <b>Chromosomes/scaffolds</b> | <b>Physical positions (bp)</b> | <b>SNPs</b> |
|-------------|----------------|------------------|------------------------------|--------------------------------|-------------|
| 14098       | CakSNP14098    | <i>Kabuli</i>    | Ca_Kabuli_Chr08              | 16421442                       | (C/G)       |
| 14099       | CakSNP14099    | <i>Kabuli</i>    | Ca_Kabuli_Chr08              | 16421545                       | (G/T)       |
| 14100       | CakSNP14100    | <i>Kabuli</i>    | Ca_Kabuli_Chr08              | 16421497                       | (C/T)       |
| 14101       | CakSNP14101    | <i>Kabuli</i>    | Ca_Kabuli_Chr08              | 16421595                       | (A/C)       |
| 14102       | CakSNP14102    | <i>Kabuli</i>    | Ca_Kabuli_Chr08              | 16432907                       | (T/G)       |
| 14103       | CakSNP14103    | <i>Kabuli</i>    | Ca_Kabuli_Chr08              | 16472919                       | (T/A)       |
| 14104       | CakSNP14104    | <i>Kabuli</i>    | Ca_Kabuli_Chr08              | 16472932                       | (C/T)       |
| 14105       | CakSNP14105    | <i>Kabuli</i>    | Ca_Kabuli_Chr08              | 16472933                       | (G/C)       |
| 14106       | CakSNP14106    | <i>Kabuli</i>    | Ca_Kabuli_Chr08              | 16472999                       | (A/C)       |
| 14107       | CakSNP14107    | <i>Kabuli</i>    | Ca_Kabuli_Chr08              | 16473047                       | (C/G)       |
| 14108       | CakSNP14108    | <i>Kabuli</i>    | Ca_Kabuli_Chr08              | 16473139                       | (C/T)       |
| 14109       | CakSNP14109    | <i>Kabuli</i>    | Ca_Kabuli_Chr08              | 16473154                       | (T/A)       |
| 14110       | CakSNP14110    | <i>Kabuli</i>    | Ca_Kabuli_Chr08              | 16473157                       | (C/T)       |
| 14111       | CakSNP14111    | <i>Kabuli</i>    | Ca_Kabuli_Chr08              | 16473311                       | (A/G)       |
| 14112       | CakSNP14112    | <i>Kabuli</i>    | Ca_Kabuli_Chr08              | 16473290                       | (A/G)       |
| 14113       | CakSNP14113    | <i>Kabuli</i>    | Ca_Kabuli_Chr08              | 16473920                       | (A/G)       |
| 14114       | CakSNP14114    | <i>Kabuli</i>    | Ca_Kabuli_Chr08              | 16473939                       | (A/G)       |
| 14115       | CakSNP14115    | <i>Kabuli</i>    | Ca_Kabuli_Chr08              | 16473987                       | (C/T)       |
| 14116       | CakSNP14116    | <i>Kabuli</i>    | Ca_Kabuli_C11058086          | 341                            | (G/A)       |
| 14117       | CakSNP14117    | <i>Kabuli</i>    | Ca_Kabuli_C11058274          | 143                            | (T/A)       |
| 14118       | CakSNP14118    | <i>Kabuli</i>    | Ca_Kabuli_C11062332          | 412                            | (G/A)       |
| 14119       | CakSNP14119    | <i>Kabuli</i>    | Ca_Kabuli_C11062436          | 381                            | (T/A)       |
| 14120       | CakSNP14120    | <i>Kabuli</i>    | Ca_Kabuli_C11062546          | 677                            | (G/T)       |
| 14121       | CakSNP14121    | <i>Kabuli</i>    | Ca_Kabuli_C11076702          | 989                            | (G/A)       |
| 14122       | CakSNP14122    | <i>Kabuli</i>    | Ca_Kabuli_C11078452          | 885                            | (G/A)       |
| 14123       | CakSNP14123    | <i>Kabuli</i>    | Ca_Kabuli_C11079766          | 1418                           | (A/C)       |
| 14124       | CakSNP14124    | <i>Kabuli</i>    | Ca_Kabuli_C11079766          | 1422                           | (G/C)       |
| 14125       | CakSNP14125    | <i>Kabuli</i>    | Ca_Kabuli_C11079766          | 1412                           | (A/T)       |
| 14126       | CakSNP14126    | <i>Kabuli</i>    | Ca_Kabuli_C11080716          | 1568                           | (A/C)       |
| 14127       | CakSNP14127    | <i>Kabuli</i>    | Ca_Kabuli_C11084624          | 656                            | (G/A)       |
| 14128       | CakSNP14128    | <i>Kabuli</i>    | Ca_Kabuli_C11084992          | 516                            | (A/G)       |
| 14129       | CakSNP14129    | <i>Kabuli</i>    | Ca_Kabuli_C11084992          | 537                            | (G/T)       |
| 14130       | CakSNP14130    | <i>Kabuli</i>    | Ca_Kabuli_C11086066          | 641                            | (A/C)       |
| 14131       | CakSNP14131    | <i>Kabuli</i>    | Ca_Kabuli_C11086066          | 624                            | (A/C)       |
| 14132       | CakSNP14132    | <i>Kabuli</i>    | Ca_Kabuli_C11088694          | 514                            | (G/C)       |
| 14133       | CakSNP14133    | <i>Kabuli</i>    | Ca_Kabuli_C11119498          | 682                            | (T/A)       |
| 14134       | CakSNP14134    | <i>Kabuli</i>    | Ca_Kabuli_C11119498          | 686                            | (C/A)       |
| 14135       | CakSNP14135    | <i>Kabuli</i>    | Ca_Kabuli_C11119498          | 689                            | (C/A)       |

| <b>S.N.</b> | <b>SNP IDs</b> | <b>Cultivars</b> | <b>Chromosomes/scaffolds</b> | <b>Physical positions (bp)</b> | <b>SNPs</b> |
|-------------|----------------|------------------|------------------------------|--------------------------------|-------------|
| 14136       | CakSNP14136    | <i>Kabuli</i>    | Ca_Kabuli_C11119498          | 693                            | (G/A)       |
| 14137       | CakSNP14137    | <i>Kabuli</i>    | Ca_Kabuli_C11132768          | 2177                           | (G/A)       |
| 14138       | CakSNP14138    | <i>Kabuli</i>    | Ca_Kabuli_C11142214          | 2902                           | (G/T)       |
| 14139       | CakSNP14139    | <i>Kabuli</i>    | Ca_Kabuli_C11142252          | 3299                           | (A/C)       |
| 14140       | CakSNP14140    | <i>Kabuli</i>    | Ca_Kabuli_C11143608          | 1389                           | (A/T)       |
| 14141       | CakSNP14141    | <i>Kabuli</i>    | Ca_Kabuli_C11147634          | 3004                           | (C/A)       |
| 14142       | CakSNP14142    | <i>Kabuli</i>    | Ca_Kabuli_C11147634          | 3028                           | (C/T)       |
| 14143       | CakSNP14143    | <i>Kabuli</i>    | Ca_Kabuli_C11149092          | 2181                           | (A/G)       |
| 14144       | CakSNP14144    | <i>Kabuli</i>    | Ca_Kabuli_C11149092          | 2281                           | (T/C)       |
| 14145       | CakSNP14145    | <i>Kabuli</i>    | Ca_Kabuli_C11149092          | 2474                           | (T/A)       |
| 14146       | CakSNP14146    | <i>Kabuli</i>    | Ca_Kabuli_C11149092          | 3190                           | (T/G)       |
| 14147       | CakSNP14147    | <i>Kabuli</i>    | Ca_Kabuli_C11149092          | 3284                           | (C/G)       |
| 14148       | CakSNP14148    | <i>Kabuli</i>    | Ca_Kabuli_C11153606          | 4275                           | (C/T)       |
| 14149       | CakSNP14149    | <i>Kabuli</i>    | Ca_Kabuli_C11157320          | 766                            | (C/G)       |
| 14150       | CakSNP14150    | <i>Kabuli</i>    | Ca_Kabuli_C11157320          | 2169                           | (T/A)       |
| 14151       | CakSNP14151    | <i>Kabuli</i>    | Ca_Kabuli_C11157320          | 2152                           | (G/C)       |
| 14152       | CakSNP14152    | <i>Kabuli</i>    | Ca_Kabuli_C11158050          | 2186                           | (A/T)       |
| 14153       | CakSNP14153    | <i>Kabuli</i>    | Ca_Kabuli_C11160518          | 4522                           | (A/G)       |
| 14154       | CakSNP14154    | <i>Kabuli</i>    | Ca_Kabuli_C11162020          | 3914                           | (C/T)       |
| 14155       | CakSNP14155    | <i>Kabuli</i>    | Ca_Kabuli_C11162020          | 3926                           | (T/G)       |
| 14156       | CakSNP14156    | <i>Kabuli</i>    | Ca_Kabuli_C11162020          | 5515                           | (G/A)       |
| 14157       | CakSNP14157    | <i>Kabuli</i>    | Ca_Kabuli_C11164954          | 5778                           | (T/A)       |
| 14158       | CakSNP14158    | <i>Kabuli</i>    | Ca_Kabuli_C11164954          | 5784                           | (G/A)       |
| 14159       | CakSNP14159    | <i>Kabuli</i>    | Ca_Kabuli_C11165474          | 6285                           | (T/A)       |
| 14160       | CakSNP14160    | <i>Kabuli</i>    | Ca_Kabuli_C11165890          | 154                            | (C/G)       |
| 14161       | CakSNP14161    | <i>Kabuli</i>    | Ca_Kabuli_C11174756          | 8931                           | (C/G)       |
| 14162       | CakSNP14162    | <i>Kabuli</i>    | Ca_Kabuli_C11175430          | 987                            | (A/G)       |
| 14163       | CakSNP14163    | <i>Kabuli</i>    | Ca_Kabuli_C11175430          | 3929                           | (T/G)       |
| 14164       | CakSNP14164    | <i>Kabuli</i>    | Ca_Kabuli_C11175430          | 3936                           | (G/T)       |
| 14165       | CakSNP14165    | <i>Kabuli</i>    | Ca_Kabuli_C11175430          | 3952                           | (T/C)       |
| 14166       | CakSNP14166    | <i>Kabuli</i>    | Ca_Kabuli_C11176688          | 4197                           | (G/C)       |
| 14167       | CakSNP14167    | <i>Kabuli</i>    | Ca_Kabuli_C11177172          | 2529                           | (T/G)       |
| 14168       | CakSNP14168    | <i>Kabuli</i>    | Ca_Kabuli_C11177172          | 2515                           | (T/A)       |
| 14169       | CakSNP14169    | <i>Kabuli</i>    | Ca_Kabuli_C11177172          | 5324                           | (G/A)       |
| 14170       | CakSNP14170    | <i>Kabuli</i>    | Ca_Kabuli_C11177748          | 1264                           | (T/A)       |
| 14171       | CakSNP14171    | <i>Kabuli</i>    | Ca_Kabuli_C11178532          | 2107                           | (A/T)       |
| 14172       | CakSNP14172    | <i>Kabuli</i>    | Ca_Kabuli_C11178532          | 3524                           | (A/G)       |
| 14173       | CakSNP14173    | <i>Kabuli</i>    | Ca_Kabuli_C11181782          | 6215                           | (A/G)       |

| <b>S.N.</b> | <b>SNP IDs</b> | <b>Cultivars</b> | <b>Chromosomes/scaffolds</b> | <b>Physical positions (bp)</b> | <b>SNPs</b> |
|-------------|----------------|------------------|------------------------------|--------------------------------|-------------|
| 14174       | CakSNP14174    | <i>Kabuli</i>    | Ca_Kabuli_C11181840          | 19192                          | (A/G)       |
| 14175       | CakSNP14175    | <i>Kabuli</i>    | Ca_Kabuli_C11181840          | 19202                          | (T/C)       |
| 14176       | CakSNP14176    | <i>Kabuli</i>    | Ca_Kabuli_Scaffold1006       | 40651                          | (T/A)       |
| 14177       | CakSNP14177    | <i>Kabuli</i>    | Ca_Kabuli_Scaffold1006       | 382579                         | (C/T)       |
| 14178       | CakSNP14178    | <i>Kabuli</i>    | Ca_Kabuli_Scaffold1006       | 436923                         | (T/C)       |
| 14179       | CakSNP14179    | <i>Kabuli</i>    | Ca_Kabuli_Scaffold1006       | 644893                         | (A/C)       |
| 14180       | CakSNP14180    | <i>Kabuli</i>    | Ca_Kabuli_Scaffold1006       | 667620                         | (A/G)       |
| 14181       | CakSNP14181    | <i>Kabuli</i>    | Ca_Kabuli_Scaffold1006       | 667713                         | (G/A)       |
| 14182       | CakSNP14182    | <i>Kabuli</i>    | Ca_Kabuli_Scaffold1006       | 674495                         | (A/G)       |
| 14183       | CakSNP14183    | <i>Kabuli</i>    | Ca_Kabuli_Scaffold1006       | 674823                         | (G/A)       |
| 14184       | CakSNP14184    | <i>Kabuli</i>    | Ca_Kabuli_Scaffold1006       | 674826                         | (C/T)       |
| 14185       | CakSNP14185    | <i>Kabuli</i>    | Ca_Kabuli_Scaffold1006       | 674844                         | (T/C)       |
| 14186       | CakSNP14186    | <i>Kabuli</i>    | Ca_Kabuli_Scaffold1006       | 674847                         | (T/G)       |
| 14187       | CakSNP14187    | <i>Kabuli</i>    | Ca_Kabuli_Scaffold1006       | 674862                         | (G/A)       |
| 14188       | CakSNP14188    | <i>Kabuli</i>    | Ca_Kabuli_Scaffold1006       | 674865                         | (T/C)       |
| 14189       | CakSNP14189    | <i>Kabuli</i>    | Ca_Kabuli_Scaffold1006       | 674871                         | (A/G)       |
| 14190       | CakSNP14190    | <i>Kabuli</i>    | Ca_Kabuli_Scaffold1006       | 674881                         | (G/A)       |
| 14191       | CakSNP14191    | <i>Kabuli</i>    | Ca_Kabuli_Scaffold1006       | 674981                         | (G/A)       |
| 14192       | CakSNP14192    | <i>Kabuli</i>    | Ca_Kabuli_Scaffold1006       | 674946                         | (G/A)       |
| 14193       | CakSNP14193    | <i>Kabuli</i>    | Ca_Kabuli_Scaffold1010       | 90092                          | (G/A)       |
| 14194       | CakSNP14194    | <i>Kabuli</i>    | Ca_Kabuli_Scaffold1013       | 56140                          | (G/A)       |
| 14195       | CakSNP14195    | <i>Kabuli</i>    | Ca_Kabuli_Scaffold1013       | 56116                          | (C/T)       |
| 14196       | CakSNP14196    | <i>Kabuli</i>    | Ca_Kabuli_Scaffold1013       | 56114                          | (C/A)       |
| 14197       | CakSNP14197    | <i>Kabuli</i>    | Ca_Kabuli_Scaffold1013       | 56075                          | (T/A)       |
| 14198       | CakSNP14198    | <i>Kabuli</i>    | Ca_Kabuli_Scaffold1013       | 56074                          | (C/T)       |
| 14199       | CakSNP14199    | <i>Kabuli</i>    | Ca_Kabuli_Scaffold1013       | 56069                          | (C/T)       |
| 14200       | CakSNP14200    | <i>Kabuli</i>    | Ca_Kabuli_Scaffold10186      | 416                            | (C/T)       |
| 14201       | CakSNP14201    | <i>Kabuli</i>    | Ca_Kabuli_Scaffold10186      | 410                            | (A/C)       |
| 14202       | CakSNP14202    | <i>Kabuli</i>    | Ca_Kabuli_Scaffold10186      | 378                            | (A/T)       |
| 14203       | CakSNP14203    | <i>Kabuli</i>    | Ca_Kabuli_Scaffold10186      | 354                            | (T/A)       |
| 14204       | CakSNP14204    | <i>Kabuli</i>    | Ca_Kabuli_Scaffold10186      | 397                            | (G/A)       |
| 14205       | CakSNP14205    | <i>Kabuli</i>    | Ca_Kabuli_Scaffold10186      | 573                            | (T/G)       |
| 14206       | CakSNP14206    | <i>Kabuli</i>    | Ca_Kabuli_Scaffold102        | 82102                          | (T/C)       |
| 14207       | CakSNP14207    | <i>Kabuli</i>    | Ca_Kabuli_Scaffold102        | 82107                          | (C/A)       |
| 14208       | CakSNP14208    | <i>Kabuli</i>    | Ca_Kabuli_Scaffold1027       | 256612                         | (A/C)       |
| 14209       | CakSNP14209    | <i>Kabuli</i>    | Ca_Kabuli_Scaffold1034       | 73684                          | (G/A)       |
| 14210       | CakSNP14210    | <i>Kabuli</i>    | Ca_Kabuli_Scaffold1034       | 73695                          | (G/T)       |
| 14211       | CakSNP14211    | <i>Kabuli</i>    | Ca_Kabuli_Scaffold10420      | 19974                          | (A/G)       |



| <b>S.N.</b> | <b>SNP IDs</b> | <b>Cultivars</b> | <b>Chromosomes/scaffolds</b> | <b>Physical positions (bp)</b> | <b>SNPs</b> |
|-------------|----------------|------------------|------------------------------|--------------------------------|-------------|
| 14212       | CakSNP14212    | <i>Kabuli</i>    | Ca_Kabuli_Scaffold10420      | 31513                          | (C/T)       |
| 14213       | CakSNP14213    | <i>Kabuli</i>    | Ca_Kabuli_Scaffold10420      | 31563                          | (A/G)       |
| 14214       | CakSNP14214    | <i>Kabuli</i>    | Ca_Kabuli_Scaffold10420      | 31817                          | (C/T)       |
| 14215       | CakSNP14215    | <i>Kabuli</i>    | Ca_Kabuli_Scaffold10420      | 40193                          | (G/T)       |
| 14216       | CakSNP14216    | <i>Kabuli</i>    | Ca_Kabuli_Scaffold1043       | 16328                          | (A/T)       |
| 14217       | CakSNP14217    | <i>Kabuli</i>    | Ca_Kabuli_Scaffold1043       | 16331                          | (G/T)       |
| 14218       | CakSNP14218    | <i>Kabuli</i>    | Ca_Kabuli_Scaffold1043       | 16333                          | (A/T)       |
| 14219       | CakSNP14219    | <i>Kabuli</i>    | Ca_Kabuli_Scaffold1043       | 16313                          | (A/G)       |
| 14220       | CakSNP14220    | <i>Kabuli</i>    | Ca_Kabuli_Scaffold1047       | 235352                         | (T/C)       |
| 14221       | CakSNP14221    | <i>Kabuli</i>    | Ca_Kabuli_Scaffold1047       | 577874                         | (T/G)       |
| 14222       | CakSNP14222    | <i>Kabuli</i>    | Ca_Kabuli_Scaffold1050       | 3398                           | (G/A)       |
| 14223       | CakSNP14223    | <i>Kabuli</i>    | Ca_Kabuli_Scaffold1050       | 3415                           | (C/T)       |
| 14224       | CakSNP14224    | <i>Kabuli</i>    | Ca_Kabuli_Scaffold1050       | 3463                           | (C/T)       |
| 14225       | CakSNP14225    | <i>Kabuli</i>    | Ca_Kabuli_Scaffold1050       | 14057                          | (C/A)       |
| 14226       | CakSNP14226    | <i>Kabuli</i>    | Ca_Kabuli_Scaffold1050       | 126986                         | (T/G)       |
| 14227       | CakSNP14227    | <i>Kabuli</i>    | Ca_Kabuli_Scaffold1050       | 127022                         | (G/A)       |
| 14228       | CakSNP14228    | <i>Kabuli</i>    | Ca_Kabuli_Scaffold1050       | 127023                         | (G/T)       |
| 14229       | CakSNP14229    | <i>Kabuli</i>    | Ca_Kabuli_Scaffold1050       | 127054                         | (C/T)       |
| 14230       | CakSNP14230    | <i>Kabuli</i>    | Ca_Kabuli_Scaffold1050       | 128763                         | (A/G)       |
| 14231       | CakSNP14231    | <i>Kabuli</i>    | Ca_Kabuli_Scaffold1055       | 344459                         | (G/A)       |
| 14232       | CakSNP14232    | <i>Kabuli</i>    | Ca_Kabuli_Scaffold1055       | 344443                         | (G/A)       |
| 14233       | CakSNP14233    | <i>Kabuli</i>    | Ca_Kabuli_Scaffold1055       | 344399                         | (C/T)       |
| 14234       | CakSNP14234    | <i>Kabuli</i>    | Ca_Kabuli_Scaffold1060       | 3278                           | (A/C)       |
| 14235       | CakSNP14235    | <i>Kabuli</i>    | Ca_Kabuli_Scaffold1060       | 3310                           | (G/T)       |
| 14236       | CakSNP14236    | <i>Kabuli</i>    | Ca_Kabuli_Scaffold1060       | 394867                         | (C/T)       |
| 14237       | CakSNP14237    | <i>Kabuli</i>    | Ca_Kabuli_Scaffold1060       | 395029                         | (C/T)       |
| 14238       | CakSNP14238    | <i>Kabuli</i>    | Ca_Kabuli_Scaffold1060       | 395042                         | (A/G)       |
| 14239       | CakSNP14239    | <i>Kabuli</i>    | Ca_Kabuli_Scaffold1061       | 63613                          | (A/G)       |
| 14240       | CakSNP14240    | <i>Kabuli</i>    | Ca_Kabuli_Scaffold1061       | 63620                          | (C/T)       |
| 14241       | CakSNP14241    | <i>Kabuli</i>    | Ca_Kabuli_Scaffold1065       | 142678                         | (A/C)       |
| 14242       | CakSNP14242    | <i>Kabuli</i>    | Ca_Kabuli_Scaffold1067       | 38623                          | (C/A)       |
| 14243       | CakSNP14243    | <i>Kabuli</i>    | Ca_Kabuli_Scaffold1081       | 768                            | (A/C)       |
| 14244       | CakSNP14244    | <i>Kabuli</i>    | Ca_Kabuli_Scaffold1081       | 798                            | (T/C)       |
| 14245       | CakSNP14245    | <i>Kabuli</i>    | Ca_Kabuli_Scaffold1081       | 800                            | (T/C)       |
| 14246       | CakSNP14246    | <i>Kabuli</i>    | Ca_Kabuli_Scaffold1081       | 805                            | (A/C)       |
| 14247       | CakSNP14247    | <i>Kabuli</i>    | Ca_Kabuli_Scaffold1081       | 818                            | (A/C)       |
| 14248       | CakSNP14248    | <i>Kabuli</i>    | Ca_Kabuli_Scaffold1089       | 1154                           | (C/A)       |
| 14249       | CakSNP14249    | <i>Kabuli</i>    | Ca_Kabuli_Scaffold1089       | 1240                           | (T/G)       |

| <b>S.N.</b> | <b>SNP IDs</b> | <b>Cultivars</b> | <b>Chromosomes/scaffolds</b> | <b>Physical positions (bp)</b> | <b>SNPs</b> |
|-------------|----------------|------------------|------------------------------|--------------------------------|-------------|
| 14250       | CakSNP14250    | <i>Kabuli</i>    | Ca_Kabuli_Scaffold1089       | 1281                           | (G/A)       |
| 14251       | CakSNP14251    | <i>Kabuli</i>    | Ca_Kabuli_Scaffold1089       | 1278                           | (T/C)       |
| 14252       | CakSNP14252    | <i>Kabuli</i>    | Ca_Kabuli_Scaffold1089       | 3160                           | (C/A)       |
| 14253       | CakSNP14253    | <i>Kabuli</i>    | Ca_Kabuli_Scaffold1089       | 3173                           | (G/T)       |
| 14254       | CakSNP14254    | <i>Kabuli</i>    | Ca_Kabuli_Scaffold1089       | 3204                           | (G/C)       |
| 14255       | CakSNP14255    | <i>Kabuli</i>    | Ca_Kabuli_Scaffold1089       | 3236                           | (T/G)       |
| 14256       | CakSNP14256    | <i>Kabuli</i>    | Ca_Kabuli_Scaffold1089       | 3249                           | (T/G)       |
| 14257       | CakSNP14257    | <i>Kabuli</i>    | Ca_Kabuli_Scaffold1089       | 3248                           | (C/T)       |
| 14258       | CakSNP14258    | <i>Kabuli</i>    | Ca_Kabuli_Scaffold1089       | 3240                           | (G/C)       |
| 14259       | CakSNP14259    | <i>Kabuli</i>    | Ca_Kabuli_Scaffold1089       | 3228                           | (C/T)       |
| 14260       | CakSNP14260    | <i>Kabuli</i>    | Ca_Kabuli_Scaffold1089       | 3191                           | (G/A)       |
| 14261       | CakSNP14261    | <i>Kabuli</i>    | Ca_Kabuli_Scaffold1089       | 3274                           | (T/C)       |
| 14262       | CakSNP14262    | <i>Kabuli</i>    | Ca_Kabuli_Scaffold1089       | 137675                         | (T/C)       |
| 14263       | CakSNP14263    | <i>Kabuli</i>    | Ca_Kabuli_Scaffold1089       | 137679                         | (G/T)       |
| 14264       | CakSNP14264    | <i>Kabuli</i>    | Ca_Kabuli_Scaffold109_1      | 156485                         | (C/T)       |
| 14265       | CakSNP14265    | <i>Kabuli</i>    | Ca_Kabuli_Scaffold109_1      | 230701                         | (G/C)       |
| 14266       | CakSNP14266    | <i>Kabuli</i>    | Ca_Kabuli_Scaffold109_1      | 244141                         | (A/C)       |
| 14267       | CakSNP14267    | <i>Kabuli</i>    | Ca_Kabuli_Scaffold109_1      | 244150                         | (C/T)       |
| 14268       | CakSNP14268    | <i>Kabuli</i>    | Ca_Kabuli_Scaffold109_1      | 244156                         | (A/C)       |
| 14269       | CakSNP14269    | <i>Kabuli</i>    | Ca_Kabuli_Scaffold109_1      | 244176                         | (A/T)       |
| 14270       | CakSNP14270    | <i>Kabuli</i>    | Ca_Kabuli_Scaffold109_1      | 328757                         | (C/T)       |
| 14271       | CakSNP14271    | <i>Kabuli</i>    | Ca_Kabuli_Scaffold109_1      | 343415                         | (G/A)       |
| 14272       | CakSNP14272    | <i>Kabuli</i>    | Ca_Kabuli_Scaffold109_1      | 343454                         | (G/A)       |
| 14273       | CakSNP14273    | <i>Kabuli</i>    | Ca_Kabuli_Scaffold109_1      | 385548                         | (T/C)       |
| 14274       | CakSNP14274    | <i>Kabuli</i>    | Ca_Kabuli_Scaffold109_1      | 385578                         | (C/G)       |
| 14275       | CakSNP14275    | <i>Kabuli</i>    | Ca_Kabuli_Scaffold109_1      | 385602                         | (C/T)       |
| 14276       | CakSNP14276    | <i>Kabuli</i>    | Ca_Kabuli_Scaffold109_1      | 385660                         | (G/A)       |
| 14277       | CakSNP14277    | <i>Kabuli</i>    | Ca_Kabuli_Scaffold109_1      | 385653                         | (C/T)       |
| 14278       | CakSNP14278    | <i>Kabuli</i>    | Ca_Kabuli_Scaffold109_1      | 442149                         | (A/T)       |
| 14279       | CakSNP14279    | <i>Kabuli</i>    | Ca_Kabuli_Scaffold109_1      | 535504                         | (G/C)       |
| 14280       | CakSNP14280    | <i>Kabuli</i>    | Ca_Kabuli_Scaffold109_1      | 586181                         | (A/C)       |
| 14281       | CakSNP14281    | <i>Kabuli</i>    | Ca_Kabuli_Scaffold109_1      | 586286                         | (C/T)       |
| 14282       | CakSNP14282    | <i>Kabuli</i>    | Ca_Kabuli_Scaffold109_1      | 696869                         | (A/C)       |
| 14283       | CakSNP14283    | <i>Kabuli</i>    | Ca_Kabuli_Scaffold109_1      | 734137                         | (G/A)       |
| 14284       | CakSNP14284    | <i>Kabuli</i>    | Ca_Kabuli_Scaffold109_1      | 734141                         | (C/T)       |
| 14285       | CakSNP14285    | <i>Kabuli</i>    | Ca_Kabuli_Scaffold109_1      | 741607                         | (G/A)       |
| 14286       | CakSNP14286    | <i>Kabuli</i>    | Ca_Kabuli_Scaffold109_1      | 763160                         | (G/A)       |
| 14287       | CakSNP14287    | <i>Kabuli</i>    | Ca_Kabuli_Scaffold1109       | 150672                         | (G/A)       |

| <b>S.N.</b> | <b>SNP IDs</b> | <b>Cultivars</b> | <b>Chromosomes/scaffolds</b> | <b>Physical positions (bp)</b> | <b>SNPs</b> |
|-------------|----------------|------------------|------------------------------|--------------------------------|-------------|
| 14288       | CakSNP14288    | <i>Kabuli</i>    | Ca_Kabuli_Scaffold1109       | 150720                         | (G/A)       |
| 14289       | CakSNP14289    | <i>Kabuli</i>    | Ca_Kabuli_Scaffold1109       | 150676                         | (C/T)       |
| 14290       | CakSNP14290    | <i>Kabuli</i>    | Ca_Kabuli_Scaffold1115       | 6234                           | (G/C)       |
| 14291       | CakSNP14291    | <i>Kabuli</i>    | Ca_Kabuli_Scaffold1115       | 131039                         | (G/A)       |
| 14292       | CakSNP14292    | <i>Kabuli</i>    | Ca_Kabuli_Scaffold1115       | 153349                         | (T/C)       |
| 14293       | CakSNP14293    | <i>Kabuli</i>    | Ca_Kabuli_Scaffold1118       | 2215                           | (T/C)       |
| 14294       | CakSNP14294    | <i>Kabuli</i>    | Ca_Kabuli_Scaffold1118       | 2224                           | (T/A)       |
| 14295       | CakSNP14295    | <i>Kabuli</i>    | Ca_Kabuli_Scaffold1118       | 2225                           | (C/T)       |
| 14296       | CakSNP14296    | <i>Kabuli</i>    | Ca_Kabuli_Scaffold1118       | 2226                           | (T/G)       |
| 14297       | CakSNP14297    | <i>Kabuli</i>    | Ca_Kabuli_Scaffold1118       | 2315                           | (T/C)       |
| 14298       | CakSNP14298    | <i>Kabuli</i>    | Ca_Kabuli_Scaffold1118       | 9568                           | (A/G)       |
| 14299       | CakSNP14299    | <i>Kabuli</i>    | Ca_Kabuli_Scaffold1118       | 9556                           | (C/T)       |
| 14300       | CakSNP14300    | <i>Kabuli</i>    | Ca_Kabuli_Scaffold1128       | 94196                          | (T/A)       |
| 14301       | CakSNP14301    | <i>Kabuli</i>    | Ca_Kabuli_Scaffold1128       | 112702                         | (G/A)       |
| 14302       | CakSNP14302    | <i>Kabuli</i>    | Ca_Kabuli_Scaffold1128       | 341416                         | (T/A)       |
| 14303       | CakSNP14303    | <i>Kabuli</i>    | Ca_Kabuli_Scaffold1128       | 360567                         | (T/A)       |
| 14304       | CakSNP14304    | <i>Kabuli</i>    | Ca_Kabuli_Scaffold1128       | 360529                         | (A/C)       |
| 14305       | CakSNP14305    | <i>Kabuli</i>    | Ca_Kabuli_Scaffold1128       | 423553                         | (A/G)       |
| 14306       | CakSNP14306    | <i>Kabuli</i>    | Ca_Kabuli_Scaffold1132       | 26497                          | (C/T)       |
| 14307       | CakSNP14307    | <i>Kabuli</i>    | Ca_Kabuli_Scaffold1132       | 26492                          | (G/A)       |
| 14308       | CakSNP14308    | <i>Kabuli</i>    | Ca_Kabuli_Scaffold1134       | 50630                          | (T/C)       |
| 14309       | CakSNP14309    | <i>Kabuli</i>    | Ca_Kabuli_Scaffold1151       | 228312                         | (C/G)       |
| 14310       | CakSNP14310    | <i>Kabuli</i>    | Ca_Kabuli_Scaffold1151       | 228304                         | (A/T)       |
| 14311       | CakSNP14311    | <i>Kabuli</i>    | Ca_Kabuli_Scaffold1151       | 228291                         | (C/T)       |
| 14312       | CakSNP14312    | <i>Kabuli</i>    | Ca_Kabuli_Scaffold1152       | 9541                           | (A/G)       |
| 14313       | CakSNP14313    | <i>Kabuli</i>    | Ca_Kabuli_Scaffold1176_2     | 52186                          | (C/T)       |
| 14314       | CakSNP14314    | <i>Kabuli</i>    | Ca_Kabuli_Scaffold1176_2     | 52146                          | (T/C)       |
| 14315       | CakSNP14315    | <i>Kabuli</i>    | Ca_Kabuli_Scaffold1176_2     | 52142                          | (G/T)       |
| 14316       | CakSNP14316    | <i>Kabuli</i>    | Ca_Kabuli_Scaffold1176_2     | 52125                          | (C/T)       |
| 14317       | CakSNP14317    | <i>Kabuli</i>    | Ca_Kabuli_Scaffold1176_2     | 52124                          | (C/T)       |
| 14318       | CakSNP14318    | <i>Kabuli</i>    | Ca_Kabuli_Scaffold1176_2     | 330840                         | (C/A)       |
| 14319       | CakSNP14319    | <i>Kabuli</i>    | Ca_Kabuli_Scaffold118        | 206562                         | (A/G)       |
| 14320       | CakSNP14320    | <i>Kabuli</i>    | Ca_Kabuli_Scaffold118        | 303784                         | (A/C)       |
| 14321       | CakSNP14321    | <i>Kabuli</i>    | Ca_Kabuli_Scaffold118        | 332673                         | (T/C)       |
| 14322       | CakSNP14322    | <i>Kabuli</i>    | Ca_Kabuli_Scaffold1180       | 114508                         | (C/A)       |
| 14323       | CakSNP14323    | <i>Kabuli</i>    | Ca_Kabuli_Scaffold1185       | 944                            | (G/A)       |
| 14324       | CakSNP14324    | <i>Kabuli</i>    | Ca_Kabuli_Scaffold1185       | 1110                           | (G/A)       |
| 14325       | CakSNP14325    | <i>Kabuli</i>    | Ca_Kabuli_Scaffold1185       | 1134                           | (T/A)       |

| <b>S.N.</b> | <b>SNP IDs</b> | <b>Cultivars</b> | <b>Chromosomes/scaffolds</b> | <b>Physical positions (bp)</b> | <b>SNPs</b> |
|-------------|----------------|------------------|------------------------------|--------------------------------|-------------|
| 14326       | CakSNP14326    | <i>Kabuli</i>    | Ca_Kabuli_Scaffold1185       | 1098                           | (T/C)       |
| 14327       | CakSNP14327    | <i>Kabuli</i>    | Ca_Kabuli_Scaffold119        | 12259                          | (A/G)       |
| 14328       | CakSNP14328    | <i>Kabuli</i>    | Ca_Kabuli_Scaffold119        | 12263                          | (C/A)       |
| 14329       | CakSNP14329    | <i>Kabuli</i>    | Ca_Kabuli_Scaffold119        | 12267                          | (C/A)       |
| 14330       | CakSNP14330    | <i>Kabuli</i>    | Ca_Kabuli_Scaffold119        | 12279                          | (G/A)       |
| 14331       | CakSNP14331    | <i>Kabuli</i>    | Ca_Kabuli_Scaffold1196       | 70506                          | (G/A)       |
| 14332       | CakSNP14332    | <i>Kabuli</i>    | Ca_Kabuli_Scaffold1196       | 70552                          | (A/C)       |
| 14333       | CakSNP14333    | <i>Kabuli</i>    | Ca_Kabuli_Scaffold1196       | 70549                          | (G/A)       |
| 14334       | CakSNP14334    | <i>Kabuli</i>    | Ca_Kabuli_Scaffold1196       | 70547                          | (G/C)       |
| 14335       | CakSNP14335    | <i>Kabuli</i>    | Ca_Kabuli_Scaffold1196       | 70535                          | (G/A)       |
| 14336       | CakSNP14336    | <i>Kabuli</i>    | Ca_Kabuli_Scaffold1196       | 70530                          | (C/T)       |
| 14337       | CakSNP14337    | <i>Kabuli</i>    | Ca_Kabuli_Scaffold1196       | 70526                          | (T/C)       |
| 14338       | CakSNP14338    | <i>Kabuli</i>    | Ca_Kabuli_Scaffold1196       | 70520                          | (G/A)       |
| 14339       | CakSNP14339    | <i>Kabuli</i>    | Ca_Kabuli_Scaffold1196       | 70503                          | (C/T)       |
| 14340       | CakSNP14340    | <i>Kabuli</i>    | Ca_Kabuli_Scaffold1196       | 203001                         | (G/A)       |
| 14341       | CakSNP14341    | <i>Kabuli</i>    | Ca_Kabuli_Scaffold1197       | 219637                         | (A/T)       |
| 14342       | CakSNP14342    | <i>Kabuli</i>    | Ca_Kabuli_Scaffold1197       | 344239                         | (A/C)       |
| 14343       | CakSNP14343    | <i>Kabuli</i>    | Ca_Kabuli_Scaffold1197       | 402506                         | (T/C)       |
| 14344       | CakSNP14344    | <i>Kabuli</i>    | Ca_Kabuli_Scaffold1197       | 407641                         | (G/A)       |
| 14345       | CakSNP14345    | <i>Kabuli</i>    | Ca_Kabuli_Scaffold1197       | 407658                         | (C/G)       |
| 14346       | CakSNP14346    | <i>Kabuli</i>    | Ca_Kabuli_Scaffold1197       | 407691                         | (T/C)       |
| 14347       | CakSNP14347    | <i>Kabuli</i>    | Ca_Kabuli_Scaffold1197       | 407695                         | (T/C)       |
| 14348       | CakSNP14348    | <i>Kabuli</i>    | Ca_Kabuli_Scaffold1197       | 447890                         | (C/T)       |
| 14349       | CakSNP14349    | <i>Kabuli</i>    | Ca_Kabuli_Scaffold1197       | 520164                         | (T/A)       |
| 14350       | CakSNP14350    | <i>Kabuli</i>    | Ca_Kabuli_Scaffold1197       | 520153                         | (C/G)       |
| 14351       | CakSNP14351    | <i>Kabuli</i>    | Ca_Kabuli_Scaffold1197       | 520148                         | (A/T)       |
| 14352       | CakSNP14352    | <i>Kabuli</i>    | Ca_Kabuli_Scaffold12         | 107756                         | (G/A)       |
| 14353       | CakSNP14353    | <i>Kabuli</i>    | Ca_Kabuli_Scaffold12         | 200573                         | (G/C)       |
| 14354       | CakSNP14354    | <i>Kabuli</i>    | Ca_Kabuli_Scaffold12         | 331877                         | (G/A)       |
| 14355       | CakSNP14355    | <i>Kabuli</i>    | Ca_Kabuli_Scaffold12         | 331890                         | (A/G)       |
| 14356       | CakSNP14356    | <i>Kabuli</i>    | Ca_Kabuli_Scaffold12         | 332909                         | (C/T)       |
| 14357       | CakSNP14357    | <i>Kabuli</i>    | Ca_Kabuli_Scaffold12         | 332921                         | (G/A)       |
| 14358       | CakSNP14358    | <i>Kabuli</i>    | Ca_Kabuli_Scaffold12         | 332963                         | (C/T)       |
| 14359       | CakSNP14359    | <i>Kabuli</i>    | Ca_Kabuli_Scaffold1202       | 46904                          | (C/T)       |
| 14360       | CakSNP14360    | <i>Kabuli</i>    | Ca_Kabuli_Scaffold1202       | 46945                          | (G/A)       |
| 14361       | CakSNP14361    | <i>Kabuli</i>    | Ca_Kabuli_Scaffold1215       | 40741                          | (G/T)       |
| 14362       | CakSNP14362    | <i>Kabuli</i>    | Ca_Kabuli_Scaffold1215       | 40793                          | (A/G)       |
| 14363       | CakSNP14363    | <i>Kabuli</i>    | Ca_Kabuli_Scaffold1215       | 40797                          | (A/T)       |

| <b>S.N.</b> | <b>SNP IDs</b> | <b>Cultivars</b> | <b>Chromosomes/scaffolds</b> | <b>Physical positions (bp)</b> | <b>SNPs</b> |
|-------------|----------------|------------------|------------------------------|--------------------------------|-------------|
| 14364       | CakSNP14364    | <i>Kabuli</i>    | Ca_Kabuli_Scaffold1215       | 40817                          | (G/A)       |
| 14365       | CakSNP14365    | <i>Kabuli</i>    | Ca_Kabuli_Scaffold1215       | 40814                          | (A/T)       |
| 14366       | CakSNP14366    | <i>Kabuli</i>    | Ca_Kabuli_Scaffold1219       | 34791                          | (G/A)       |
| 14367       | CakSNP14367    | <i>Kabuli</i>    | Ca_Kabuli_Scaffold1219       | 85015                          | (A/C)       |
| 14368       | CakSNP14368    | <i>Kabuli</i>    | Ca_Kabuli_Scaffold1259       | 71428                          | (C/T)       |
| 14369       | CakSNP14369    | <i>Kabuli</i>    | Ca_Kabuli_Scaffold1259       | 71574                          | (A/T)       |
| 14370       | CakSNP14370    | <i>Kabuli</i>    | Ca_Kabuli_Scaffold1259       | 71649                          | (C/T)       |
| 14371       | CakSNP14371    | <i>Kabuli</i>    | Ca_Kabuli_Scaffold127        | 28809                          | (A/T)       |
| 14372       | CakSNP14372    | <i>Kabuli</i>    | Ca_Kabuli_Scaffold127        | 28780                          | (G/A)       |
| 14373       | CakSNP14373    | <i>Kabuli</i>    | Ca_Kabuli_Scaffold127        | 28778                          | (C/T)       |
| 14374       | CakSNP14374    | <i>Kabuli</i>    | Ca_Kabuli_Scaffold127        | 28776                          | (T/G)       |
| 14375       | CakSNP14375    | <i>Kabuli</i>    | Ca_Kabuli_Scaffold127        | 28772                          | (G/A)       |
| 14376       | CakSNP14376    | <i>Kabuli</i>    | Ca_Kabuli_Scaffold1272       | 57303                          | (C/A)       |
| 14377       | CakSNP14377    | <i>Kabuli</i>    | Ca_Kabuli_Scaffold1272       | 57356                          | (C/G)       |
| 14378       | CakSNP14378    | <i>Kabuli</i>    | Ca_Kabuli_Scaffold128        | 19256                          | (A/C)       |
| 14379       | CakSNP14379    | <i>Kabuli</i>    | Ca_Kabuli_Scaffold128        | 19315                          | (C/T)       |
| 14380       | CakSNP14380    | <i>Kabuli</i>    | Ca_Kabuli_Scaffold128        | 52881                          | (G/A)       |
| 14381       | CakSNP14381    | <i>Kabuli</i>    | Ca_Kabuli_Scaffold128        | 52855                          | (G/C)       |
| 14382       | CakSNP14382    | <i>Kabuli</i>    | Ca_Kabuli_Scaffold128        | 52844                          | (A/T)       |
| 14383       | CakSNP14383    | <i>Kabuli</i>    | Ca_Kabuli_Scaffold128        | 263590                         | (G/T)       |
| 14384       | CakSNP14384    | <i>Kabuli</i>    | Ca_Kabuli_Scaffold128        | 263586                         | (T/A)       |
| 14385       | CakSNP14385    | <i>Kabuli</i>    | Ca_Kabuli_Scaffold128        | 263572                         | (T/A)       |
| 14386       | CakSNP14386    | <i>Kabuli</i>    | Ca_Kabuli_Scaffold128        | 334180                         | (G/T)       |
| 14387       | CakSNP14387    | <i>Kabuli</i>    | Ca_Kabuli_Scaffold128        | 334129                         | (G/A)       |
| 14388       | CakSNP14388    | <i>Kabuli</i>    | Ca_Kabuli_Scaffold128        | 593782                         | (T/C)       |
| 14389       | CakSNP14389    | <i>Kabuli</i>    | Ca_Kabuli_Scaffold128        | 860975                         | (G/A)       |
| 14390       | CakSNP14390    | <i>Kabuli</i>    | Ca_Kabuli_Scaffold128        | 860981                         | (T/A)       |
| 14391       | CakSNP14391    | <i>Kabuli</i>    | Ca_Kabuli_Scaffold128        | 860983                         | (A/T)       |
| 14392       | CakSNP14392    | <i>Kabuli</i>    | Ca_Kabuli_Scaffold128        | 860987                         | (C/T)       |
| 14393       | CakSNP14393    | <i>Kabuli</i>    | Ca_Kabuli_Scaffold128        | 861003                         | (C/A)       |
| 14394       | CakSNP14394    | <i>Kabuli</i>    | Ca_Kabuli_Scaffold128        | 861010                         | (C/T)       |
| 14395       | CakSNP14395    | <i>Kabuli</i>    | Ca_Kabuli_Scaffold128        | 861022                         | (T/C)       |
| 14396       | CakSNP14396    | <i>Kabuli</i>    | Ca_Kabuli_Scaffold128        | 861028                         | (T/C)       |
| 14397       | CakSNP14397    | <i>Kabuli</i>    | Ca_Kabuli_Scaffold128        | 861072                         | (G/T)       |
| 14398       | CakSNP14398    | <i>Kabuli</i>    | Ca_Kabuli_Scaffold128        | 861053                         | (G/A)       |
| 14399       | CakSNP14399    | <i>Kabuli</i>    | Ca_Kabuli_Scaffold128        | 861036                         | (G/A)       |
| 14400       | CakSNP14400    | <i>Kabuli</i>    | Ca_Kabuli_Scaffold128        | 861015                         | (C/T)       |
| 14401       | CakSNP14401    | <i>Kabuli</i>    | Ca_Kabuli_Scaffold1281       | 211456                         | (A/T)       |

| <b>S.N.</b> | <b>SNP IDs</b> | <b>Cultivars</b> | <b>Chromosomes/scaffolds</b> | <b>Physical positions (bp)</b> | <b>SNPs</b> |
|-------------|----------------|------------------|------------------------------|--------------------------------|-------------|
| 14402       | CakSNP14402    | <i>Kabuli</i>    | Ca_Kabuli_Scaffold1281       | 239742                         | (T/C)       |
| 14403       | CakSNP14403    | <i>Kabuli</i>    | Ca_Kabuli_Scaffold1281       | 244153                         | (A/C)       |
| 14404       | CakSNP14404    | <i>Kabuli</i>    | Ca_Kabuli_Scaffold1281       | 258565                         | (G/A)       |
| 14405       | CakSNP14405    | <i>Kabuli</i>    | Ca_Kabuli_Scaffold1281       | 316037                         | (A/G)       |
| 14406       | CakSNP14406    | <i>Kabuli</i>    | Ca_Kabuli_Scaffold1281       | 396888                         | (G/A)       |
| 14407       | CakSNP14407    | <i>Kabuli</i>    | Ca_Kabuli_Scaffold1281       | 396996                         | (C/T)       |
| 14408       | CakSNP14408    | <i>Kabuli</i>    | Ca_Kabuli_Scaffold1281       | 396992                         | (A/G)       |
| 14409       | CakSNP14409    | <i>Kabuli</i>    | Ca_Kabuli_Scaffold1281       | 398693                         | (G/A)       |
| 14410       | CakSNP14410    | <i>Kabuli</i>    | Ca_Kabuli_Scaffold1281       | 398729                         | (T/G)       |
| 14411       | CakSNP14411    | <i>Kabuli</i>    | Ca_Kabuli_Scaffold1281       | 398887                         | (G/A)       |
| 14412       | CakSNP14412    | <i>Kabuli</i>    | Ca_Kabuli_Scaffold1281       | 408214                         | (C/T)       |
| 14413       | CakSNP14413    | <i>Kabuli</i>    | Ca_Kabuli_Scaffold1281       | 408170                         | (C/T)       |
| 14414       | CakSNP14414    | <i>Kabuli</i>    | Ca_Kabuli_Scaffold1281       | 526446                         | (C/T)       |
| 14415       | CakSNP14415    | <i>Kabuli</i>    | Ca_Kabuli_Scaffold1281       | 526442                         | (T/C)       |
| 14416       | CakSNP14416    | <i>Kabuli</i>    | Ca_Kabuli_Scaffold1281       | 527012                         | (C/T)       |
| 14417       | CakSNP14417    | <i>Kabuli</i>    | Ca_Kabuli_Scaffold1281       | 527008                         | (T/C)       |
| 14418       | CakSNP14418    | <i>Kabuli</i>    | Ca_Kabuli_Scaffold1285       | 68330                          | (G/A)       |
| 14419       | CakSNP14419    | <i>Kabuli</i>    | Ca_Kabuli_Scaffold1285       | 68327                          | (G/T)       |
| 14420       | CakSNP14420    | <i>Kabuli</i>    | Ca_Kabuli_Scaffold1285       | 68324                          | (T/C)       |
| 14421       | CakSNP14421    | <i>Kabuli</i>    | Ca_Kabuli_Scaffold1285       | 68315                          | (T/C)       |
| 14422       | CakSNP14422    | <i>Kabuli</i>    | Ca_Kabuli_Scaffold1285       | 68311                          | (G/A)       |
| 14423       | CakSNP14423    | <i>Kabuli</i>    | Ca_Kabuli_Scaffold1285       | 96310                          | (A/C)       |
| 14424       | CakSNP14424    | <i>Kabuli</i>    | Ca_Kabuli_Scaffold1285       | 96358                          | (T/C)       |
| 14425       | CakSNP14425    | <i>Kabuli</i>    | Ca_Kabuli_Scaffold1285       | 96429                          | (C/T)       |
| 14426       | CakSNP14426    | <i>Kabuli</i>    | Ca_Kabuli_Scaffold1285       | 96428                          | (G/A)       |
| 14427       | CakSNP14427    | <i>Kabuli</i>    | Ca_Kabuli_Scaffold1285       | 96414                          | (C/T)       |
| 14428       | CakSNP14428    | <i>Kabuli</i>    | Ca_Kabuli_Scaffold1285       | 96411                          | (G/A)       |
| 14429       | CakSNP14429    | <i>Kabuli</i>    | Ca_Kabuli_Scaffold1285       | 96409                          | (C/T)       |
| 14430       | CakSNP14430    | <i>Kabuli</i>    | Ca_Kabuli_Scaffold1285       | 96399                          | (C/T)       |
| 14431       | CakSNP14431    | <i>Kabuli</i>    | Ca_Kabuli_Scaffold1285       | 105553                         | (T/C)       |
| 14432       | CakSNP14432    | <i>Kabuli</i>    | Ca_Kabuli_Scaffold1285       | 105507                         | (A/T)       |
| 14433       | CakSNP14433    | <i>Kabuli</i>    | Ca_Kabuli_Scaffold1285       | 105504                         | (G/A)       |
| 14434       | CakSNP14434    | <i>Kabuli</i>    | Ca_Kabuli_Scaffold1285       | 192068                         | (T/G)       |
| 14435       | CakSNP14435    | <i>Kabuli</i>    | Ca_Kabuli_Scaffold1285       | 240762                         | (C/T)       |
| 14436       | CakSNP14436    | <i>Kabuli</i>    | Ca_Kabuli_Scaffold1285       | 240735                         | (G/A)       |
| 14437       | CakSNP14437    | <i>Kabuli</i>    | Ca_Kabuli_Scaffold1285       | 240730                         | (T/C)       |
| 14438       | CakSNP14438    | <i>Kabuli</i>    | Ca_Kabuli_Scaffold1285       | 240723                         | (C/T)       |
| 14439       | CakSNP14439    | <i>Kabuli</i>    | Ca_Kabuli_Scaffold1301_1     | 43433                          | (T/C)       |

| <b>S.N.</b> | <b>SNP IDs</b> | <b>Cultivars</b> | <b>Chromosomes/scaffolds</b> | <b>Physical positions (bp)</b> | <b>SNPs</b> |
|-------------|----------------|------------------|------------------------------|--------------------------------|-------------|
| 14440       | CakSNP14440    | <i>Kabuli</i>    | Ca_Kabuli_Scaffold1301_1     | 45565                          | (A/C)       |
| 14441       | CakSNP14441    | <i>Kabuli</i>    | Ca_Kabuli_Scaffold1301_1     | 45566                          | (G/A)       |
| 14442       | CakSNP14442    | <i>Kabuli</i>    | Ca_Kabuli_Scaffold1301_1     | 58243                          | (A/G)       |
| 14443       | CakSNP14443    | <i>Kabuli</i>    | Ca_Kabuli_Scaffold1301_1     | 58337                          | (C/T)       |
| 14444       | CakSNP14444    | <i>Kabuli</i>    | Ca_Kabuli_Scaffold1301_1     | 58460                          | (A/T)       |
| 14445       | CakSNP14445    | <i>Kabuli</i>    | Ca_Kabuli_Scaffold1301_1     | 63148                          | (T/C)       |
| 14446       | CakSNP14446    | <i>Kabuli</i>    | Ca_Kabuli_Scaffold1301_1     | 95495                          | (G/A)       |
| 14447       | CakSNP14447    | <i>Kabuli</i>    | Ca_Kabuli_Scaffold1301_1     | 95497                          | (G/A)       |
| 14448       | CakSNP14448    | <i>Kabuli</i>    | Ca_Kabuli_Scaffold1301_1     | 95602                          | (T/C)       |
| 14449       | CakSNP14449    | <i>Kabuli</i>    | Ca_Kabuli_Scaffold1301_1     | 95533                          | (C/G)       |
| 14450       | CakSNP14450    | <i>Kabuli</i>    | Ca_Kabuli_Scaffold1301_1     | 122496                         | (T/A)       |
| 14451       | CakSNP14451    | <i>Kabuli</i>    | Ca_Kabuli_Scaffold1301_1     | 122563                         | (T/C)       |
| 14452       | CakSNP14452    | <i>Kabuli</i>    | Ca_Kabuli_Scaffold1301_1     | 154342                         | (A/C)       |
| 14453       | CakSNP14453    | <i>Kabuli</i>    | Ca_Kabuli_Scaffold1301_1     | 157390                         | (A/G)       |
| 14454       | CakSNP14454    | <i>Kabuli</i>    | Ca_Kabuli_Scaffold1301_1     | 218538                         | (G/A)       |
| 14455       | CakSNP14455    | <i>Kabuli</i>    | Ca_Kabuli_Scaffold1308       | 44260                          | (A/G)       |
| 14456       | CakSNP14456    | <i>Kabuli</i>    | Ca_Kabuli_Scaffold1309       | 49259                          | (G/A)       |
| 14457       | CakSNP14457    | <i>Kabuli</i>    | Ca_Kabuli_Scaffold1312       | 98400                          | (T/C)       |
| 14458       | CakSNP14458    | <i>Kabuli</i>    | Ca_Kabuli_Scaffold1313       | 18173                          | (A/G)       |
| 14459       | CakSNP14459    | <i>Kabuli</i>    | Ca_Kabuli_Scaffold1313       | 18412                          | (G/A)       |
| 14460       | CakSNP14460    | <i>Kabuli</i>    | Ca_Kabuli_Scaffold1313       | 227732                         | (G/A)       |
| 14461       | CakSNP14461    | <i>Kabuli</i>    | Ca_Kabuli_Scaffold1313       | 227744                         | (C/T)       |
| 14462       | CakSNP14462    | <i>Kabuli</i>    | Ca_Kabuli_Scaffold1315       | 115480                         | (G/A)       |
| 14463       | CakSNP14463    | <i>Kabuli</i>    | Ca_Kabuli_Scaffold1315       | 115476                         | (A/C)       |
| 14464       | CakSNP14464    | <i>Kabuli</i>    | Ca_Kabuli_Scaffold1315       | 115471                         | (G/A)       |
| 14465       | CakSNP14465    | <i>Kabuli</i>    | Ca_Kabuli_Scaffold1315       | 115446                         | (C/A)       |
| 14466       | CakSNP14466    | <i>Kabuli</i>    | Ca_Kabuli_Scaffold1315       | 115481                         | (G/T)       |
| 14467       | CakSNP14467    | <i>Kabuli</i>    | Ca_Kabuli_Scaffold132        | 153364                         | (A/G)       |
| 14468       | CakSNP14468    | <i>Kabuli</i>    | Ca_Kabuli_Scaffold132        | 153361                         | (A/G)       |
| 14469       | CakSNP14469    | <i>Kabuli</i>    | Ca_Kabuli_Scaffold1324       | 228151                         | (G/A)       |
| 14470       | CakSNP14470    | <i>Kabuli</i>    | Ca_Kabuli_Scaffold1324       | 228159                         | (A/C)       |
| 14471       | CakSNP14471    | <i>Kabuli</i>    | Ca_Kabuli_Scaffold1324       | 262208                         | (C/G)       |
| 14472       | CakSNP14472    | <i>Kabuli</i>    | Ca_Kabuli_Scaffold134        | 218290                         | (C/T)       |
| 14473       | CakSNP14473    | <i>Kabuli</i>    | Ca_Kabuli_Scaffold134        | 218352                         | (T/G)       |
| 14474       | CakSNP14474    | <i>Kabuli</i>    | Ca_Kabuli_Scaffold134        | 218336                         | (T/G)       |
| 14475       | CakSNP14475    | <i>Kabuli</i>    | Ca_Kabuli_Scaffold134        | 223318                         | (C/T)       |
| 14476       | CakSNP14476    | <i>Kabuli</i>    | Ca_Kabuli_Scaffold134        | 223303                         | (T/C)       |
| 14477       | CakSNP14477    | <i>Kabuli</i>    | Ca_Kabuli_Scaffold134        | 233007                         | (C/T)       |

| <b>S.N.</b> | <b>SNP IDs</b> | <b>Cultivars</b> | <b>Chromosomes/scaffolds</b> | <b>Physical positions (bp)</b> | <b>SNPs</b> |
|-------------|----------------|------------------|------------------------------|--------------------------------|-------------|
| 14478       | CakSNP14478    | <i>Kabuli</i>    | Ca_Kabuli_Scaffold134        | 275661                         | (T/A)       |
| 14479       | CakSNP14479    | <i>Kabuli</i>    | Ca_Kabuli_Scaffold1348_1     | 84644                          | (G/C)       |
| 14480       | CakSNP14480    | <i>Kabuli</i>    | Ca_Kabuli_Scaffold1348_1     | 134575                         | (T/C)       |
| 14481       | CakSNP14481    | <i>Kabuli</i>    | Ca_Kabuli_Scaffold1348_1     | 134572                         | (G/A)       |
| 14482       | CakSNP14482    | <i>Kabuli</i>    | Ca_Kabuli_Scaffold1348_1     | 294458                         | (A/G)       |
| 14483       | CakSNP14483    | <i>Kabuli</i>    | Ca_Kabuli_Scaffold1348_1     | 294456                         | (A/G)       |
| 14484       | CakSNP14484    | <i>Kabuli</i>    | Ca_Kabuli_Scaffold1348_1     | 380156                         | (A/T)       |
| 14485       | CakSNP14485    | <i>Kabuli</i>    | Ca_Kabuli_Scaffold1348_1     | 380225                         | (T/G)       |
| 14486       | CakSNP14486    | <i>Kabuli</i>    | Ca_Kabuli_Scaffold1348_1     | 380227                         | (C/G)       |
| 14487       | CakSNP14487    | <i>Kabuli</i>    | Ca_Kabuli_Scaffold1348_1     | 380244                         | (C/G)       |
| 14488       | CakSNP14488    | <i>Kabuli</i>    | Ca_Kabuli_Scaffold1348_1     | 380289                         | (C/T)       |
| 14489       | CakSNP14489    | <i>Kabuli</i>    | Ca_Kabuli_Scaffold1348_1     | 380336                         | (G/C)       |
| 14490       | CakSNP14490    | <i>Kabuli</i>    | Ca_Kabuli_Scaffold1348_1     | 381026                         | (G/T)       |
| 14491       | CakSNP14491    | <i>Kabuli</i>    | Ca_Kabuli_Scaffold1348_1     | 452011                         | (G/T)       |
| 14492       | CakSNP14492    | <i>Kabuli</i>    | Ca_Kabuli_Scaffold1348_1     | 454342                         | (G/T)       |
| 14493       | CakSNP14493    | <i>Kabuli</i>    | Ca_Kabuli_Scaffold1348_1     | 515602                         | (A/C)       |
| 14494       | CakSNP14494    | <i>Kabuli</i>    | Ca_Kabuli_Scaffold1348_1     | 535984                         | (G/T)       |
| 14495       | CakSNP14495    | <i>Kabuli</i>    | Ca_Kabuli_Scaffold1348_1     | 552192                         | (C/A)       |
| 14496       | CakSNP14496    | <i>Kabuli</i>    | Ca_Kabuli_Scaffold1348_1     | 552299                         | (T/C)       |
| 14497       | CakSNP14497    | <i>Kabuli</i>    | Ca_Kabuli_Scaffold1348_1     | 552342                         | (G/A)       |
| 14498       | CakSNP14498    | <i>Kabuli</i>    | Ca_Kabuli_Scaffold1348_1     | 552328                         | (A/G)       |
| 14499       | CakSNP14499    | <i>Kabuli</i>    | Ca_Kabuli_Scaffold1348_1     | 553863                         | (G/T)       |
| 14500       | CakSNP14500    | <i>Kabuli</i>    | Ca_Kabuli_Scaffold1348_1     | 553978                         | (C/T)       |
| 14501       | CakSNP14501    | <i>Kabuli</i>    | Ca_Kabuli_Scaffold1348_1     | 554003                         | (G/C)       |
| 14502       | CakSNP14502    | <i>Kabuli</i>    | Ca_Kabuli_Scaffold1348_1     | 554134                         | (A/G)       |
| 14503       | CakSNP14503    | <i>Kabuli</i>    | Ca_Kabuli_Scaffold1348_1     | 554215                         | (T/G)       |
| 14504       | CakSNP14504    | <i>Kabuli</i>    | Ca_Kabuli_Scaffold1348_1     | 651906                         | (A/T)       |
| 14505       | CakSNP14505    | <i>Kabuli</i>    | Ca_Kabuli_Scaffold1348_1     | 652067                         | (A/G)       |
| 14506       | CakSNP14506    | <i>Kabuli</i>    | Ca_Kabuli_Scaffold1348_1     | 667541                         | (A/C)       |
| 14507       | CakSNP14507    | <i>Kabuli</i>    | Ca_Kabuli_Scaffold1348_1     | 667504                         | (C/T)       |
| 14508       | CakSNP14508    | <i>Kabuli</i>    | Ca_Kabuli_Scaffold1348_1     | 679305                         | (T/C)       |
| 14509       | CakSNP14509    | <i>Kabuli</i>    | Ca_Kabuli_Scaffold1348_1     | 680734                         | (G/T)       |
| 14510       | CakSNP14510    | <i>Kabuli</i>    | Ca_Kabuli_Scaffold1348_1     | 680730                         | (C/T)       |
| 14511       | CakSNP14511    | <i>Kabuli</i>    | Ca_Kabuli_Scaffold1348_1     | 680718                         | (A/T)       |
| 14512       | CakSNP14512    | <i>Kabuli</i>    | Ca_Kabuli_Scaffold1348_1     | 708276                         | (G/A)       |
| 14513       | CakSNP14513    | <i>Kabuli</i>    | Ca_Kabuli_Scaffold1348_1     | 708302                         | (G/T)       |
| 14514       | CakSNP14514    | <i>Kabuli</i>    | Ca_Kabuli_Scaffold1348_1     | 708344                         | (G/A)       |
| 14515       | CakSNP14515    | <i>Kabuli</i>    | Ca_Kabuli_Scaffold1348_1     | 732450                         | (A/C)       |



| <b>S.N.</b> | <b>SNP IDs</b> | <b>Cultivars</b> | <b>Chromosomes/scaffolds</b> | <b>Physical positions (bp)</b> | <b>SNPs</b> |
|-------------|----------------|------------------|------------------------------|--------------------------------|-------------|
| 14516       | CakSNP14516    | <i>Kabuli</i>    | Ca_Kabuli_Scaffold1348_1     | 732454                         | (T/G)       |
| 14517       | CakSNP14517    | <i>Kabuli</i>    | Ca_Kabuli_Scaffold1348_1     | 732460                         | (T/A)       |
| 14518       | CakSNP14518    | <i>Kabuli</i>    | Ca_Kabuli_Scaffold1348_1     | 732496                         | (G/T)       |
| 14519       | CakSNP14519    | <i>Kabuli</i>    | Ca_Kabuli_Scaffold1348_1     | 735782                         | (C/T)       |
| 14520       | CakSNP14520    | <i>Kabuli</i>    | Ca_Kabuli_Scaffold1348_1     | 735812                         | (G/A)       |
| 14521       | CakSNP14521    | <i>Kabuli</i>    | Ca_Kabuli_Scaffold1348_1     | 750170                         | (C/A)       |
| 14522       | CakSNP14522    | <i>Kabuli</i>    | Ca_Kabuli_Scaffold1348_1     | 750162                         | (T/C)       |
| 14523       | CakSNP14523    | <i>Kabuli</i>    | Ca_Kabuli_Scaffold1348_1     | 750213                         | (C/A)       |
| 14524       | CakSNP14524    | <i>Kabuli</i>    | Ca_Kabuli_Scaffold1348_1     | 771029                         | (T/A)       |
| 14525       | CakSNP14525    | <i>Kabuli</i>    | Ca_Kabuli_Scaffold1348_1     | 871724                         | (G/A)       |
| 14526       | CakSNP14526    | <i>Kabuli</i>    | Ca_Kabuli_Scaffold1348_1     | 909909                         | (A/G)       |
| 14527       | CakSNP14527    | <i>Kabuli</i>    | Ca_Kabuli_Scaffold1348_1     | 909967                         | (C/G)       |
| 14528       | CakSNP14528    | <i>Kabuli</i>    | Ca_Kabuli_Scaffold1348_1     | 909965                         | (T/A)       |
| 14529       | CakSNP14529    | <i>Kabuli</i>    | Ca_Kabuli_Scaffold1348_1     | 909959                         | (A/C)       |
| 14530       | CakSNP14530    | <i>Kabuli</i>    | Ca_Kabuli_Scaffold1348_1     | 924164                         | (T/G)       |
| 14531       | CakSNP14531    | <i>Kabuli</i>    | Ca_Kabuli_Scaffold1348_1     | 934720                         | (C/A)       |
| 14532       | CakSNP14532    | <i>Kabuli</i>    | Ca_Kabuli_Scaffold1348_1     | 934791                         | (C/T)       |
| 14533       | CakSNP14533    | <i>Kabuli</i>    | Ca_Kabuli_Scaffold1348_1     | 950995                         | (A/G)       |
| 14534       | CakSNP14534    | <i>Kabuli</i>    | Ca_Kabuli_Scaffold1348_1     | 959608                         | (A/C)       |
| 14535       | CakSNP14535    | <i>Kabuli</i>    | Ca_Kabuli_Scaffold1348_1     | 959828                         | (G/A)       |
| 14536       | CakSNP14536    | <i>Kabuli</i>    | Ca_Kabuli_Scaffold1348_1     | 959780                         | (G/A)       |
| 14537       | CakSNP14537    | <i>Kabuli</i>    | Ca_Kabuli_Scaffold1348_1     | 970927                         | (A/G)       |
| 14538       | CakSNP14538    | <i>Kabuli</i>    | Ca_Kabuli_Scaffold1348_1     | 981964                         | (T/C)       |
| 14539       | CakSNP14539    | <i>Kabuli</i>    | Ca_Kabuli_Scaffold1348_1     | 983101                         | (T/G)       |
| 14540       | CakSNP14540    | <i>Kabuli</i>    | Ca_Kabuli_Scaffold1348_1     | 1020258                        | (C/T)       |
| 14541       | CakSNP14541    | <i>Kabuli</i>    | Ca_Kabuli_Scaffold1348_1     | 1023898                        | (G/A)       |
| 14542       | CakSNP14542    | <i>Kabuli</i>    | Ca_Kabuli_Scaffold1348_1     | 1023923                        | (G/A)       |
| 14543       | CakSNP14543    | <i>Kabuli</i>    | Ca_Kabuli_Scaffold1348_1     | 1023954                        | (G/C)       |
| 14544       | CakSNP14544    | <i>Kabuli</i>    | Ca_Kabuli_Scaffold1348_1     | 1066818                        | (A/C)       |
| 14545       | CakSNP14545    | <i>Kabuli</i>    | Ca_Kabuli_Scaffold1348_1     | 1066783                        | (C/T)       |
| 14546       | CakSNP14546    | <i>Kabuli</i>    | Ca_Kabuli_Scaffold1348_1     | 1066776                        | (T/C)       |
| 14547       | CakSNP14547    | <i>Kabuli</i>    | Ca_Kabuli_Scaffold1348_1     | 1072750                        | (C/T)       |
| 14548       | CakSNP14548    | <i>Kabuli</i>    | Ca_Kabuli_Scaffold1348_1     | 1145082                        | (A/C)       |
| 14549       | CakSNP14549    | <i>Kabuli</i>    | Ca_Kabuli_Scaffold1348_1     | 1145124                        | (T/C)       |
| 14550       | CakSNP14550    | <i>Kabuli</i>    | Ca_Kabuli_Scaffold1348_1     | 1207442                        | (G/A)       |
| 14551       | CakSNP14551    | <i>Kabuli</i>    | Ca_Kabuli_Scaffold1348_1     | 1236956                        | (A/G)       |
| 14552       | CakSNP14552    | <i>Kabuli</i>    | Ca_Kabuli_Scaffold1348_1     | 1263560                        | (T/G)       |
| 14553       | CakSNP14553    | <i>Kabuli</i>    | Ca_Kabuli_Scaffold1348_1     | 1265627                        | (T/C)       |

| <b>S.N.</b> | <b>SNP IDs</b> | <b>Cultivars</b> | <b>Chromosomes/scaffolds</b> | <b>Physical positions (bp)</b> | <b>SNPs</b> |
|-------------|----------------|------------------|------------------------------|--------------------------------|-------------|
| 14554       | CakSNP14554    | <i>Kabuli</i>    | Ca_Kabuli_Scaffold1348_1     | 1265635                        | (T/G)       |
| 14555       | CakSNP14555    | <i>Kabuli</i>    | Ca_Kabuli_Scaffold1348_1     | 1273341                        | (G/A)       |
| 14556       | CakSNP14556    | <i>Kabuli</i>    | Ca_Kabuli_Scaffold1348_1     | 1273388                        | (G/A)       |
| 14557       | CakSNP14557    | <i>Kabuli</i>    | Ca_Kabuli_Scaffold1348_1     | 1288448                        | (A/G)       |
| 14558       | CakSNP14558    | <i>Kabuli</i>    | Ca_Kabuli_Scaffold1348_1     | 1294675                        | (A/T)       |
| 14559       | CakSNP14559    | <i>Kabuli</i>    | Ca_Kabuli_Scaffold1348_1     | 1296453                        | (G/A)       |
| 14560       | CakSNP14560    | <i>Kabuli</i>    | Ca_Kabuli_Scaffold1348_1     | 1330256                        | (A/G)       |
| 14561       | CakSNP14561    | <i>Kabuli</i>    | Ca_Kabuli_Scaffold1348_1     | 1330288                        | (A/G)       |
| 14562       | CakSNP14562    | <i>Kabuli</i>    | Ca_Kabuli_Scaffold1348_1     | 1330400                        | (A/G)       |
| 14563       | CakSNP14563    | <i>Kabuli</i>    | Ca_Kabuli_Scaffold1348_1     | 1346914                        | (G/T)       |
| 14564       | CakSNP14564    | <i>Kabuli</i>    | Ca_Kabuli_Scaffold1348_1     | 1346943                        | (G/A)       |
| 14565       | CakSNP14565    | <i>Kabuli</i>    | Ca_Kabuli_Scaffold1348_1     | 1372535                        | (G/A)       |
| 14566       | CakSNP14566    | <i>Kabuli</i>    | Ca_Kabuli_Scaffold1348_1     | 1403452                        | (G/A)       |
| 14567       | CakSNP14567    | <i>Kabuli</i>    | Ca_Kabuli_Scaffold1348_1     | 1403480                        | (A/G)       |
| 14568       | CakSNP14568    | <i>Kabuli</i>    | Ca_Kabuli_Scaffold1351       | 172111                         | (G/A)       |
| 14569       | CakSNP14569    | <i>Kabuli</i>    | Ca_Kabuli_Scaffold1351       | 172110                         | (T/C)       |
| 14570       | CakSNP14570    | <i>Kabuli</i>    | Ca_Kabuli_Scaffold1351       | 177159                         | (G/A)       |
| 14571       | CakSNP14571    | <i>Kabuli</i>    | Ca_Kabuli_Scaffold1351       | 177172                         | (G/A)       |
| 14572       | CakSNP14572    | <i>Kabuli</i>    | Ca_Kabuli_Scaffold1351       | 177178                         | (T/C)       |
| 14573       | CakSNP14573    | <i>Kabuli</i>    | Ca_Kabuli_Scaffold1351       | 177181                         | (A/G)       |
| 14574       | CakSNP14574    | <i>Kabuli</i>    | Ca_Kabuli_Scaffold1351       | 177194                         | (G/A)       |
| 14575       | CakSNP14575    | <i>Kabuli</i>    | Ca_Kabuli_Scaffold1351       | 177202                         | (G/A)       |
| 14576       | CakSNP14576    | <i>Kabuli</i>    | Ca_Kabuli_Scaffold1351       | 177171                         | (T/G)       |
| 14577       | CakSNP14577    | <i>Kabuli</i>    | Ca_Kabuli_Scaffold1351       | 177193                         | (T/C)       |
| 14578       | CakSNP14578    | <i>Kabuli</i>    | Ca_Kabuli_Scaffold1351       | 177256                         | (T/G)       |
| 14579       | CakSNP14579    | <i>Kabuli</i>    | Ca_Kabuli_Scaffold1351       | 177248                         | (G/T)       |
| 14580       | CakSNP14580    | <i>Kabuli</i>    | Ca_Kabuli_Scaffold1351       | 177247                         | (G/A)       |
| 14581       | CakSNP14581    | <i>Kabuli</i>    | Ca_Kabuli_Scaffold1351       | 177242                         | (G/A)       |
| 14582       | CakSNP14582    | <i>Kabuli</i>    | Ca_Kabuli_Scaffold1351       | 177241                         | (T/G)       |
| 14583       | CakSNP14583    | <i>Kabuli</i>    | Ca_Kabuli_Scaffold1351       | 177240                         | (C/A)       |
| 14584       | CakSNP14584    | <i>Kabuli</i>    | Ca_Kabuli_Scaffold1351       | 177235                         | (G/T)       |
| 14585       | CakSNP14585    | <i>Kabuli</i>    | Ca_Kabuli_Scaffold1351       | 177234                         | (A/C)       |
| 14586       | CakSNP14586    | <i>Kabuli</i>    | Ca_Kabuli_Scaffold1351       | 177210                         | (T/A)       |
| 14587       | CakSNP14587    | <i>Kabuli</i>    | Ca_Kabuli_Scaffold1351       | 177200                         | (T/G)       |
| 14588       | CakSNP14588    | <i>Kabuli</i>    | Ca_Kabuli_Scaffold1351       | 177191                         | (C/T)       |
| 14589       | CakSNP14589    | <i>Kabuli</i>    | Ca_Kabuli_Scaffold1351       | 177188                         | (G/T)       |
| 14590       | CakSNP14590    | <i>Kabuli</i>    | Ca_Kabuli_Scaffold1351       | 204656                         | (C/A)       |
| 14591       | CakSNP14591    | <i>Kabuli</i>    | Ca_Kabuli_Scaffold1351       | 335227                         | (T/C)       |

| <b>S.N.</b> | <b>SNP IDs</b> | <b>Cultivars</b> | <b>Chromosomes/scaffolds</b> | <b>Physical positions (bp)</b> | <b>SNPs</b> |
|-------------|----------------|------------------|------------------------------|--------------------------------|-------------|
| 14592       | CakSNP14592    | <i>Kabuli</i>    | Ca_Kabuli_Scaffold1351       | 335239                         | (G/T)       |
| 14593       | CakSNP14593    | <i>Kabuli</i>    | Ca_Kabuli_Scaffold1351       | 367576                         | (A/G)       |
| 14594       | CakSNP14594    | <i>Kabuli</i>    | Ca_Kabuli_Scaffold1351       | 367578                         | (G/A)       |
| 14595       | CakSNP14595    | <i>Kabuli</i>    | Ca_Kabuli_Scaffold1351       | 367745                         | (G/A)       |
| 14596       | CakSNP14596    | <i>Kabuli</i>    | Ca_Kabuli_Scaffold1369       | 8015                           | (T/A)       |
| 14597       | CakSNP14597    | <i>Kabuli</i>    | Ca_Kabuli_Scaffold1369       | 8115                           | (T/G)       |
| 14598       | CakSNP14598    | <i>Kabuli</i>    | Ca_Kabuli_Scaffold1369       | 8154                           | (T/G)       |
| 14599       | CakSNP14599    | <i>Kabuli</i>    | Ca_Kabuli_Scaffold1369       | 8221                           | (T/G)       |
| 14600       | CakSNP14600    | <i>Kabuli</i>    | Ca_Kabuli_Scaffold1369       | 8327                           | (G/A)       |
| 14601       | CakSNP14601    | <i>Kabuli</i>    | Ca_Kabuli_Scaffold1369       | 31000                          | (A/G)       |
| 14602       | CakSNP14602    | <i>Kabuli</i>    | Ca_Kabuli_Scaffold1390       | 98354                          | (A/G)       |
| 14603       | CakSNP14603    | <i>Kabuli</i>    | Ca_Kabuli_Scaffold1401       | 89077                          | (T/C)       |
| 14604       | CakSNP14604    | <i>Kabuli</i>    | Ca_Kabuli_Scaffold1401       | 89074                          | (T/C)       |
| 14605       | CakSNP14605    | <i>Kabuli</i>    | Ca_Kabuli_Scaffold1417       | 4863                           | (A/G)       |
| 14606       | CakSNP14606    | <i>Kabuli</i>    | Ca_Kabuli_Scaffold1417       | 4906                           | (G/A)       |
| 14607       | CakSNP14607    | <i>Kabuli</i>    | Ca_Kabuli_Scaffold1417       | 4917                           | (G/T)       |
| 14608       | CakSNP14608    | <i>Kabuli</i>    | Ca_Kabuli_Scaffold1417       | 76627                          | (A/C)       |
| 14609       | CakSNP14609    | <i>Kabuli</i>    | Ca_Kabuli_Scaffold1417       | 230210                         | (T/G)       |
| 14610       | CakSNP14610    | <i>Kabuli</i>    | Ca_Kabuli_Scaffold1419       | 24845                          | (C/T)       |
| 14611       | CakSNP14611    | <i>Kabuli</i>    | Ca_Kabuli_Scaffold143        | 18492                          | (A/G)       |
| 14612       | CakSNP14612    | <i>Kabuli</i>    | Ca_Kabuli_Scaffold1439       | 242972                         | (A/G)       |
| 14613       | CakSNP14613    | <i>Kabuli</i>    | Ca_Kabuli_Scaffold1448       | 47306                          | (A/G)       |
| 14614       | CakSNP14614    | <i>Kabuli</i>    | Ca_Kabuli_Scaffold1448       | 74436                          | (C/T)       |
| 14615       | CakSNP14615    | <i>Kabuli</i>    | Ca_Kabuli_Scaffold1448       | 74434                          | (C/T)       |
| 14616       | CakSNP14616    | <i>Kabuli</i>    | Ca_Kabuli_Scaffold1448       | 74529                          | (C/T)       |
| 14617       | CakSNP14617    | <i>Kabuli</i>    | Ca_Kabuli_Scaffold1448       | 76809                          | (G/A)       |
| 14618       | CakSNP14618    | <i>Kabuli</i>    | Ca_Kabuli_Scaffold1449       | 55474                          | (T/G)       |
| 14619       | CakSNP14619    | <i>Kabuli</i>    | Ca_Kabuli_Scaffold1449       | 55529                          | (G/A)       |
| 14620       | CakSNP14620    | <i>Kabuli</i>    | Ca_Kabuli_Scaffold1449       | 55532                          | (G/A)       |
| 14621       | CakSNP14621    | <i>Kabuli</i>    | Ca_Kabuli_Scaffold1452       | 3501                           | (C/A)       |
| 14622       | CakSNP14622    | <i>Kabuli</i>    | Ca_Kabuli_Scaffold1452       | 3496                           | (A/T)       |
| 14623       | CakSNP14623    | <i>Kabuli</i>    | Ca_Kabuli_Scaffold1452       | 3495                           | (C/A)       |
| 14624       | CakSNP14624    | <i>Kabuli</i>    | Ca_Kabuli_Scaffold1452       | 3737                           | (C/A)       |
| 14625       | CakSNP14625    | <i>Kabuli</i>    | Ca_Kabuli_Scaffold1462       | 1556                           | (T/G)       |
| 14626       | CakSNP14626    | <i>Kabuli</i>    | Ca_Kabuli_Scaffold1466       | 90846                          | (C/A)       |
| 14627       | CakSNP14627    | <i>Kabuli</i>    | Ca_Kabuli_Scaffold1466       | 165472                         | (C/T)       |
| 14628       | CakSNP14628    | <i>Kabuli</i>    | Ca_Kabuli_Scaffold1466       | 322287                         | (G/A)       |
| 14629       | CakSNP14629    | <i>Kabuli</i>    | Ca_Kabuli_Scaffold1466       | 322315                         | (G/T)       |

| <b>S.N.</b> | <b>SNP IDs</b> | <b>Cultivars</b> | <b>Chromosomes/scaffolds</b> | <b>Physical positions (bp)</b> | <b>SNPs</b> |
|-------------|----------------|------------------|------------------------------|--------------------------------|-------------|
| 14630       | CakSNP14630    | <i>Kabuli</i>    | Ca_Kabuli_Scaffold1466       | 322450                         | (G/T)       |
| 14631       | CakSNP14631    | <i>Kabuli</i>    | Ca_Kabuli_Scaffold1466       | 322448                         | (T/G)       |
| 14632       | CakSNP14632    | <i>Kabuli</i>    | Ca_Kabuli_Scaffold1466       | 322421                         | (C/T)       |
| 14633       | CakSNP14633    | <i>Kabuli</i>    | Ca_Kabuli_Scaffold1466       | 322415                         | (G/A)       |
| 14634       | CakSNP14634    | <i>Kabuli</i>    | Ca_Kabuli_Scaffold1466       | 322414                         | (G/A)       |
| 14635       | CakSNP14635    | <i>Kabuli</i>    | Ca_Kabuli_Scaffold1466       | 322400                         | (C/T)       |
| 14636       | CakSNP14636    | <i>Kabuli</i>    | Ca_Kabuli_Scaffold1466       | 322390                         | (G/A)       |
| 14637       | CakSNP14637    | <i>Kabuli</i>    | Ca_Kabuli_Scaffold1466       | 322383                         | (C/T)       |
| 14638       | CakSNP14638    | <i>Kabuli</i>    | Ca_Kabuli_Scaffold1467       | 205779                         | (A/G)       |
| 14639       | CakSNP14639    | <i>Kabuli</i>    | Ca_Kabuli_Scaffold1467       | 205803                         | (C/T)       |
| 14640       | CakSNP14640    | <i>Kabuli</i>    | Ca_Kabuli_Scaffold1467       | 205833                         | (G/A)       |
| 14641       | CakSNP14641    | <i>Kabuli</i>    | Ca_Kabuli_Scaffold1467       | 205840                         | (G/A)       |
| 14642       | CakSNP14642    | <i>Kabuli</i>    | Ca_Kabuli_Scaffold1467       | 205845                         | (A/G)       |
| 14643       | CakSNP14643    | <i>Kabuli</i>    | Ca_Kabuli_Scaffold1467       | 206121                         | (G/A)       |
| 14644       | CakSNP14644    | <i>Kabuli</i>    | Ca_Kabuli_Scaffold1467       | 206118                         | (C/T)       |
| 14645       | CakSNP14645    | <i>Kabuli</i>    | Ca_Kabuli_Scaffold1467       | 206100                         | (G/A)       |
| 14646       | CakSNP14646    | <i>Kabuli</i>    | Ca_Kabuli_Scaffold1467       | 206094                         | (T/C)       |
| 14647       | CakSNP14647    | <i>Kabuli</i>    | Ca_Kabuli_Scaffold1467       | 206085                         | (T/C)       |
| 14648       | CakSNP14648    | <i>Kabuli</i>    | Ca_Kabuli_Scaffold1467       | 206068                         | (A/G)       |
| 14649       | CakSNP14649    | <i>Kabuli</i>    | Ca_Kabuli_Scaffold1467       | 206067                         | (T/G)       |
| 14650       | CakSNP14650    | <i>Kabuli</i>    | Ca_Kabuli_Scaffold1475       | 4820                           | (G/A)       |
| 14651       | CakSNP14651    | <i>Kabuli</i>    | Ca_Kabuli_Scaffold1475       | 4796                           | (C/T)       |
| 14652       | CakSNP14652    | <i>Kabuli</i>    | Ca_Kabuli_Scaffold1475       | 4794                           | (C/A)       |
| 14653       | CakSNP14653    | <i>Kabuli</i>    | Ca_Kabuli_Scaffold1475       | 4755                           | (T/A)       |
| 14654       | CakSNP14654    | <i>Kabuli</i>    | Ca_Kabuli_Scaffold1475       | 4754                           | (C/T)       |
| 14655       | CakSNP14655    | <i>Kabuli</i>    | Ca_Kabuli_Scaffold1475       | 4749                           | (C/T)       |
| 14656       | CakSNP14656    | <i>Kabuli</i>    | Ca_Kabuli_Scaffold1475       | 4873                           | (G/T)       |
| 14657       | CakSNP14657    | <i>Kabuli</i>    | Ca_Kabuli_Scaffold1475       | 4845                           | (A/T)       |
| 14658       | CakSNP14658    | <i>Kabuli</i>    | Ca_Kabuli_Scaffold1475       | 4833                           | (G/A)       |
| 14659       | CakSNP14659    | <i>Kabuli</i>    | Ca_Kabuli_Scaffold1475       | 4818                           | (C/T)       |
| 14660       | CakSNP14660    | <i>Kabuli</i>    | Ca_Kabuli_Scaffold1483       | 56686                          | (A/T)       |
| 14661       | CakSNP14661    | <i>Kabuli</i>    | Ca_Kabuli_Scaffold1483       | 56721                          | (G/C)       |
| 14662       | CakSNP14662    | <i>Kabuli</i>    | Ca_Kabuli_Scaffold1493       | 81740                          | (C/T)       |
| 14663       | CakSNP14663    | <i>Kabuli</i>    | Ca_Kabuli_Scaffold1493       | 81784                          | (C/A)       |
| 14664       | CakSNP14664    | <i>Kabuli</i>    | Ca_Kabuli_Scaffold1493       | 81789                          | (G/A)       |
| 14665       | CakSNP14665    | <i>Kabuli</i>    | Ca_Kabuli_Scaffold1496       | 289997                         | (G/T)       |
| 14666       | CakSNP14666    | <i>Kabuli</i>    | Ca_Kabuli_Scaffold1496       | 290018                         | (C/A)       |
| 14667       | CakSNP14667    | <i>Kabuli</i>    | Ca_Kabuli_Scaffold1498       | 3474                           | (A/C)       |

| <b>S.N.</b> | <b>SNP IDs</b> | <b>Cultivars</b> | <b>Chromosomes/scaffolds</b> | <b>Physical positions (bp)</b> | <b>SNPs</b> |
|-------------|----------------|------------------|------------------------------|--------------------------------|-------------|
| 14668       | CakSNP14668    | <i>Kabuli</i>    | Ca_Kabuli_Scaffold1498       | 3657                           | (C/T)       |
| 14669       | CakSNP14669    | <i>Kabuli</i>    | Ca_Kabuli_Scaffold1498       | 3641                           | (T/C)       |
| 14670       | CakSNP14670    | <i>Kabuli</i>    | Ca_Kabuli_Scaffold1504       | 160623                         | (G/T)       |
| 14671       | CakSNP14671    | <i>Kabuli</i>    | Ca_Kabuli_Scaffold1504       | 189700                         | (A/G)       |
| 14672       | CakSNP14672    | <i>Kabuli</i>    | Ca_Kabuli_Scaffold1504       | 189699                         | (C/T)       |
| 14673       | CakSNP14673    | <i>Kabuli</i>    | Ca_Kabuli_Scaffold1504       | 189681                         | (C/T)       |
| 14674       | CakSNP14674    | <i>Kabuli</i>    | Ca_Kabuli_Scaffold1504       | 189664                         | (G/A)       |
| 14675       | CakSNP14675    | <i>Kabuli</i>    | Ca_Kabuli_Scaffold1504       | 189663                         | (G/A)       |
| 14676       | CakSNP14676    | <i>Kabuli</i>    | Ca_Kabuli_Scaffold1504       | 197789                         | (G/A)       |
| 14677       | CakSNP14677    | <i>Kabuli</i>    | Ca_Kabuli_Scaffold1504       | 197790                         | (G/A)       |
| 14678       | CakSNP14678    | <i>Kabuli</i>    | Ca_Kabuli_Scaffold1504       | 197819                         | (T/G)       |
| 14679       | CakSNP14679    | <i>Kabuli</i>    | Ca_Kabuli_Scaffold1505       | 33297                          | (A/C)       |
| 14680       | CakSNP14680    | <i>Kabuli</i>    | Ca_Kabuli_Scaffold151        | 267060                         | (T/G)       |
| 14681       | CakSNP14681    | <i>Kabuli</i>    | Ca_Kabuli_Scaffold151        | 275743                         | (T/A)       |
| 14682       | CakSNP14682    | <i>Kabuli</i>    | Ca_Kabuli_Scaffold1521       | 20734                          | (C/A)       |
| 14683       | CakSNP14683    | <i>Kabuli</i>    | Ca_Kabuli_Scaffold1521       | 20779                          | (T/C)       |
| 14684       | CakSNP14684    | <i>Kabuli</i>    | Ca_Kabuli_Scaffold1521       | 20851                          | (C/T)       |
| 14685       | CakSNP14685    | <i>Kabuli</i>    | Ca_Kabuli_Scaffold1545       | 111476                         | (G/A)       |
| 14686       | CakSNP14686    | <i>Kabuli</i>    | Ca_Kabuli_Scaffold1545       | 113148                         | (T/C)       |
| 14687       | CakSNP14687    | <i>Kabuli</i>    | Ca_Kabuli_Scaffold1553       | 5078                           | (G/A)       |
| 14688       | CakSNP14688    | <i>Kabuli</i>    | Ca_Kabuli_Scaffold1553       | 5115                           | (C/T)       |
| 14689       | CakSNP14689    | <i>Kabuli</i>    | Ca_Kabuli_Scaffold1553       | 5125                           | (A/G)       |
| 14690       | CakSNP14690    | <i>Kabuli</i>    | Ca_Kabuli_Scaffold157        | 100228                         | (A/G)       |
| 14691       | CakSNP14691    | <i>Kabuli</i>    | Ca_Kabuli_Scaffold157        | 100529                         | (T/C)       |
| 14692       | CakSNP14692    | <i>Kabuli</i>    | Ca_Kabuli_Scaffold157        | 102779                         | (C/T)       |
| 14693       | CakSNP14693    | <i>Kabuli</i>    | Ca_Kabuli_Scaffold157        | 106331                         | (G/A)       |
| 14694       | CakSNP14694    | <i>Kabuli</i>    | Ca_Kabuli_Scaffold157        | 106349                         | (C/T)       |
| 14695       | CakSNP14695    | <i>Kabuli</i>    | Ca_Kabuli_Scaffold157        | 133602                         | (A/G)       |
| 14696       | CakSNP14696    | <i>Kabuli</i>    | Ca_Kabuli_Scaffold157        | 133583                         | (T/G)       |
| 14697       | CakSNP14697    | <i>Kabuli</i>    | Ca_Kabuli_Scaffold157        | 141880                         | (A/G)       |
| 14698       | CakSNP14698    | <i>Kabuli</i>    | Ca_Kabuli_Scaffold157        | 142444                         | (A/T)       |
| 14699       | CakSNP14699    | <i>Kabuli</i>    | Ca_Kabuli_Scaffold157        | 142455                         | (T/C)       |
| 14700       | CakSNP14700    | <i>Kabuli</i>    | Ca_Kabuli_Scaffold157        | 142470                         | (G/T)       |
| 14701       | CakSNP14701    | <i>Kabuli</i>    | Ca_Kabuli_Scaffold157        | 151081                         | (G/A)       |
| 14702       | CakSNP14702    | <i>Kabuli</i>    | Ca_Kabuli_Scaffold157        | 151199                         | (T/A)       |
| 14703       | CakSNP14703    | <i>Kabuli</i>    | Ca_Kabuli_Scaffold157        | 151192                         | (T/C)       |
| 14704       | CakSNP14704    | <i>Kabuli</i>    | Ca_Kabuli_Scaffold157        | 151177                         | (A/G)       |
| 14705       | CakSNP14705    | <i>Kabuli</i>    | Ca_Kabuli_Scaffold157        | 151131                         | (T/A)       |

| <b>S.N.</b> | <b>SNP IDs</b> | <b>Cultivars</b> | <b>Chromosomes/scaffolds</b> | <b>Physical positions (bp)</b> | <b>SNPs</b> |
|-------------|----------------|------------------|------------------------------|--------------------------------|-------------|
| 14706       | CakSNP14706    | <i>Kabuli</i>    | Ca_Kabuli_Scaffold157        | 213380                         | (C/G)       |
| 14707       | CakSNP14707    | <i>Kabuli</i>    | Ca_Kabuli_Scaffold157        | 213398                         | (T/G)       |
| 14708       | CakSNP14708    | <i>Kabuli</i>    | Ca_Kabuli_Scaffold157        | 213404                         | (T/G)       |
| 14709       | CakSNP14709    | <i>Kabuli</i>    | Ca_Kabuli_Scaffold157        | 213518                         | (T/C)       |
| 14710       | CakSNP14710    | <i>Kabuli</i>    | Ca_Kabuli_Scaffold157        | 213487                         | (G/C)       |
| 14711       | CakSNP14711    | <i>Kabuli</i>    | Ca_Kabuli_Scaffold157        | 213477                         | (G/A)       |
| 14712       | CakSNP14712    | <i>Kabuli</i>    | Ca_Kabuli_Scaffold157        | 229917                         | (G/A)       |
| 14713       | CakSNP14713    | <i>Kabuli</i>    | Ca_Kabuli_Scaffold157        | 229900                         | (G/A)       |
| 14714       | CakSNP14714    | <i>Kabuli</i>    | Ca_Kabuli_Scaffold157        | 321386                         | (C/T)       |
| 14715       | CakSNP14715    | <i>Kabuli</i>    | Ca_Kabuli_Scaffold157        | 326434                         | (A/G)       |
| 14716       | CakSNP14716    | <i>Kabuli</i>    | Ca_Kabuli_Scaffold157        | 326467                         | (C/T)       |
| 14717       | CakSNP14717    | <i>Kabuli</i>    | Ca_Kabuli_Scaffold157        | 326494                         | (A/G)       |
| 14718       | CakSNP14718    | <i>Kabuli</i>    | Ca_Kabuli_Scaffold157        | 326497                         | (A/G)       |
| 14719       | CakSNP14719    | <i>Kabuli</i>    | Ca_Kabuli_Scaffold157        | 352687                         | (C/T)       |
| 14720       | CakSNP14720    | <i>Kabuli</i>    | Ca_Kabuli_Scaffold157        | 352712                         | (G/A)       |
| 14721       | CakSNP14721    | <i>Kabuli</i>    | Ca_Kabuli_Scaffold157        | 352747                         | (T/C)       |
| 14722       | CakSNP14722    | <i>Kabuli</i>    | Ca_Kabuli_Scaffold157        | 355222                         | (G/A)       |
| 14723       | CakSNP14723    | <i>Kabuli</i>    | Ca_Kabuli_Scaffold157        | 469198                         | (A/C)       |
| 14724       | CakSNP14724    | <i>Kabuli</i>    | Ca_Kabuli_Scaffold157        | 535057                         | (T/G)       |
| 14725       | CakSNP14725    | <i>Kabuli</i>    | Ca_Kabuli_Scaffold1575       | 2230                           | (C/T)       |
| 14726       | CakSNP14726    | <i>Kabuli</i>    | Ca_Kabuli_Scaffold1580       | 71861                          | (G/T)       |
| 14727       | CakSNP14727    | <i>Kabuli</i>    | Ca_Kabuli_Scaffold1580       | 119410                         | (T/C)       |
| 14728       | CakSNP14728    | <i>Kabuli</i>    | Ca_Kabuli_Scaffold1580       | 119678                         | (T/C)       |
| 14729       | CakSNP14729    | <i>Kabuli</i>    | Ca_Kabuli_Scaffold1580       | 163148                         | (A/T)       |
| 14730       | CakSNP14730    | <i>Kabuli</i>    | Ca_Kabuli_Scaffold1580       | 163194                         | (T/C)       |
| 14731       | CakSNP14731    | <i>Kabuli</i>    | Ca_Kabuli_Scaffold1580       | 380649                         | (A/T)       |
| 14732       | CakSNP14732    | <i>Kabuli</i>    | Ca_Kabuli_Scaffold1585       | 59010                          | (C/A)       |
| 14733       | CakSNP14733    | <i>Kabuli</i>    | Ca_Kabuli_Scaffold1603       | 11828                          | (C/G)       |
| 14734       | CakSNP14734    | <i>Kabuli</i>    | Ca_Kabuli_Scaffold1607       | 107222                         | (T/C)       |
| 14735       | CakSNP14735    | <i>Kabuli</i>    | Ca_Kabuli_Scaffold1613       | 48917                          | (T/G)       |
| 14736       | CakSNP14736    | <i>Kabuli</i>    | Ca_Kabuli_Scaffold1613       | 107664                         | (T/A)       |
| 14737       | CakSNP14737    | <i>Kabuli</i>    | Ca_Kabuli_Scaffold1613       | 107750                         | (T/A)       |
| 14738       | CakSNP14738    | <i>Kabuli</i>    | Ca_Kabuli_Scaffold1631       | 202418                         | (A/G)       |
| 14739       | CakSNP14739    | <i>Kabuli</i>    | Ca_Kabuli_Scaffold1635       | 83227                          | (G/C)       |
| 14740       | CakSNP14740    | <i>Kabuli</i>    | Ca_Kabuli_Scaffold1635       | 83345                          | (A/T)       |
| 14741       | CakSNP14741    | <i>Kabuli</i>    | Ca_Kabuli_Scaffold1654       | 26432                          | (G/A)       |
| 14742       | CakSNP14742    | <i>Kabuli</i>    | Ca_Kabuli_Scaffold1659       | 303945                         | (T/G)       |
| 14743       | CakSNP14743    | <i>Kabuli</i>    | Ca_Kabuli_Scaffold1661       | 70434                          | (A/G)       |

| <b>S.N.</b> | <b>SNP IDs</b> | <b>Cultivars</b> | <b>Chromosomes/scaffolds</b> | <b>Physical positions (bp)</b> | <b>SNPs</b> |
|-------------|----------------|------------------|------------------------------|--------------------------------|-------------|
| 14744       | CakSNP14744    | <i>Kabuli</i>    | Ca_Kabuli_Scaffold1664       | 94989                          | (G/A)       |
| 14745       | CakSNP14745    | <i>Kabuli</i>    | Ca_Kabuli_Scaffold1664       | 94984                          | (A/T)       |
| 14746       | CakSNP14746    | <i>Kabuli</i>    | Ca_Kabuli_Scaffold1664       | 94930                          | (G/C)       |
| 14747       | CakSNP14747    | <i>Kabuli</i>    | Ca_Kabuli_Scaffold167        | 11018                          | (T/A)       |
| 14748       | CakSNP14748    | <i>Kabuli</i>    | Ca_Kabuli_Scaffold167        | 11009                          | (A/T)       |
| 14749       | CakSNP14749    | <i>Kabuli</i>    | Ca_Kabuli_Scaffold167        | 137869                         | (C/T)       |
| 14750       | CakSNP14750    | <i>Kabuli</i>    | Ca_Kabuli_Scaffold167        | 137848                         | (A/G)       |
| 14751       | CakSNP14751    | <i>Kabuli</i>    | Ca_Kabuli_Scaffold167        | 239687                         | (G/A)       |
| 14752       | CakSNP14752    | <i>Kabuli</i>    | Ca_Kabuli_Scaffold167        | 327829                         | (T/C)       |
| 14753       | CakSNP14753    | <i>Kabuli</i>    | Ca_Kabuli_Scaffold1687       | 82935                          | (A/C)       |
| 14754       | CakSNP14754    | <i>Kabuli</i>    | Ca_Kabuli_Scaffold1699       | 27556                          | (A/C)       |
| 14755       | CakSNP14755    | <i>Kabuli</i>    | Ca_Kabuli_Scaffold1699       | 27607                          | (T/G)       |
| 14756       | CakSNP14756    | <i>Kabuli</i>    | Ca_Kabuli_Scaffold1708       | 69664                          | (A/T)       |
| 14757       | CakSNP14757    | <i>Kabuli</i>    | Ca_Kabuli_Scaffold171        | 96763                          | (T/C)       |
| 14758       | CakSNP14758    | <i>Kabuli</i>    | Ca_Kabuli_Scaffold171        | 183718                         | (T/C)       |
| 14759       | CakSNP14759    | <i>Kabuli</i>    | Ca_Kabuli_Scaffold171        | 183720                         | (C/T)       |
| 14760       | CakSNP14760    | <i>Kabuli</i>    | Ca_Kabuli_Scaffold171        | 183721                         | (G/A)       |
| 14761       | CakSNP14761    | <i>Kabuli</i>    | Ca_Kabuli_Scaffold171        | 183727                         | (C/T)       |
| 14762       | CakSNP14762    | <i>Kabuli</i>    | Ca_Kabuli_Scaffold171        | 183759                         | (T/C)       |
| 14763       | CakSNP14763    | <i>Kabuli</i>    | Ca_Kabuli_Scaffold171        | 186125                         | (C/A)       |
| 14764       | CakSNP14764    | <i>Kabuli</i>    | Ca_Kabuli_Scaffold171        | 208050                         | (A/G)       |
| 14765       | CakSNP14765    | <i>Kabuli</i>    | Ca_Kabuli_Scaffold171        | 209964                         | (G/T)       |
| 14766       | CakSNP14766    | <i>Kabuli</i>    | Ca_Kabuli_Scaffold1718       | 302                            | (G/A)       |
| 14767       | CakSNP14767    | <i>Kabuli</i>    | Ca_Kabuli_Scaffold1718       | 295                            | (G/A)       |
| 14768       | CakSNP14768    | <i>Kabuli</i>    | Ca_Kabuli_Scaffold1718       | 289                            | (C/T)       |
| 14769       | CakSNP14769    | <i>Kabuli</i>    | Ca_Kabuli_Scaffold1718       | 268                            | (C/G)       |
| 14770       | CakSNP14770    | <i>Kabuli</i>    | Ca_Kabuli_Scaffold1718       | 3898                           | (G/C)       |
| 14771       | CakSNP14771    | <i>Kabuli</i>    | Ca_Kabuli_Scaffold1718       | 21521                          | (A/G)       |
| 14772       | CakSNP14772    | <i>Kabuli</i>    | Ca_Kabuli_Scaffold1718       | 40669                          | (T/C)       |
| 14773       | CakSNP14773    | <i>Kabuli</i>    | Ca_Kabuli_Scaffold1722       | 65999                          | (C/A)       |
| 14774       | CakSNP14774    | <i>Kabuli</i>    | Ca_Kabuli_Scaffold1722       | 135589                         | (C/T)       |
| 14775       | CakSNP14775    | <i>Kabuli</i>    | Ca_Kabuli_Scaffold1728       | 33301                          | (A/C)       |
| 14776       | CakSNP14776    | <i>Kabuli</i>    | Ca_Kabuli_Scaffold174        | 17761                          | (A/C)       |
| 14777       | CakSNP14777    | <i>Kabuli</i>    | Ca_Kabuli_Scaffold174        | 32366                          | (T/C)       |
| 14778       | CakSNP14778    | <i>Kabuli</i>    | Ca_Kabuli_Scaffold174        | 44014                          | (T/G)       |
| 14779       | CakSNP14779    | <i>Kabuli</i>    | Ca_Kabuli_Scaffold174        | 61454                          | (T/C)       |
| 14780       | CakSNP14780    | <i>Kabuli</i>    | Ca_Kabuli_Scaffold174        | 263899                         | (G/A)       |
| 14781       | CakSNP14781    | <i>Kabuli</i>    | Ca_Kabuli_Scaffold174        | 335077                         | (C/T)       |

| <b>S.N.</b> | <b>SNP IDs</b> | <b>Cultivars</b> | <b>Chromosomes/scaffolds</b> | <b>Physical positions (bp)</b> | <b>SNPs</b> |
|-------------|----------------|------------------|------------------------------|--------------------------------|-------------|
| 14782       | CakSNP14782    | <i>Kabuli</i>    | Ca_Kabuli_Scaffold174        | 341322                         | (C/T)       |
| 14783       | CakSNP14783    | <i>Kabuli</i>    | Ca_Kabuli_Scaffold174        | 457627                         | (G/A)       |
| 14784       | CakSNP14784    | <i>Kabuli</i>    | Ca_Kabuli_Scaffold1750       | 15510                          | (C/T)       |
| 14785       | CakSNP14785    | <i>Kabuli</i>    | Ca_Kabuli_Scaffold1750       | 137106                         | (A/C)       |
| 14786       | CakSNP14786    | <i>Kabuli</i>    | Ca_Kabuli_Scaffold1750       | 204638                         | (G/A)       |
| 14787       | CakSNP14787    | <i>Kabuli</i>    | Ca_Kabuli_Scaffold1751       | 189367                         | (T/G)       |
| 14788       | CakSNP14788    | <i>Kabuli</i>    | Ca_Kabuli_Scaffold1751       | 192417                         | (C/A)       |
| 14789       | CakSNP14789    | <i>Kabuli</i>    | Ca_Kabuli_Scaffold1751       | 192713                         | (G/T)       |
| 14790       | CakSNP14790    | <i>Kabuli</i>    | Ca_Kabuli_Scaffold1751       | 193026                         | (T/A)       |
| 14791       | CakSNP14791    | <i>Kabuli</i>    | Ca_Kabuli_Scaffold1751       | 193013                         | (T/G)       |
| 14792       | CakSNP14792    | <i>Kabuli</i>    | Ca_Kabuli_Scaffold1751       | 266583                         | (G/A)       |
| 14793       | CakSNP14793    | <i>Kabuli</i>    | Ca_Kabuli_Scaffold1751       | 496626                         | (G/A)       |
| 14794       | CakSNP14794    | <i>Kabuli</i>    | Ca_Kabuli_Scaffold1751       | 528896                         | (A/C)       |
| 14795       | CakSNP14795    | <i>Kabuli</i>    | Ca_Kabuli_Scaffold1751       | 529005                         | (C/T)       |
| 14796       | CakSNP14796    | <i>Kabuli</i>    | Ca_Kabuli_Scaffold1751       | 528979                         | (T/C)       |
| 14797       | CakSNP14797    | <i>Kabuli</i>    | Ca_Kabuli_Scaffold1751       | 528973                         | (C/G)       |
| 14798       | CakSNP14798    | <i>Kabuli</i>    | Ca_Kabuli_Scaffold1751       | 625364                         | (G/A)       |
| 14799       | CakSNP14799    | <i>Kabuli</i>    | Ca_Kabuli_Scaffold1751       | 625362                         | (C/T)       |
| 14800       | CakSNP14800    | <i>Kabuli</i>    | Ca_Kabuli_Scaffold1751       | 625355                         | (C/T)       |
| 14801       | CakSNP14801    | <i>Kabuli</i>    | Ca_Kabuli_Scaffold1751       | 625342                         | (C/T)       |
| 14802       | CakSNP14802    | <i>Kabuli</i>    | Ca_Kabuli_Scaffold1751       | 625335                         | (G/A)       |
| 14803       | CakSNP14803    | <i>Kabuli</i>    | Ca_Kabuli_Scaffold1751       | 625395                         | (A/G)       |
| 14804       | CakSNP14804    | <i>Kabuli</i>    | Ca_Kabuli_Scaffold1751       | 625394                         | (C/T)       |
| 14805       | CakSNP14805    | <i>Kabuli</i>    | Ca_Kabuli_Scaffold1751       | 625389                         | (A/C)       |
| 14806       | CakSNP14806    | <i>Kabuli</i>    | Ca_Kabuli_Scaffold1751       | 625378                         | (G/A)       |
| 14807       | CakSNP14807    | <i>Kabuli</i>    | Ca_Kabuli_Scaffold1751       | 625375                         | (G/A)       |
| 14808       | CakSNP14808    | <i>Kabuli</i>    | Ca_Kabuli_Scaffold1751       | 625366                         | (T/C)       |
| 14809       | CakSNP14809    | <i>Kabuli</i>    | Ca_Kabuli_Scaffold1751       | 625365                         | (T/C)       |
| 14810       | CakSNP14810    | <i>Kabuli</i>    | Ca_Kabuli_Scaffold1751       | 625332                         | (A/C)       |
| 14811       | CakSNP14811    | <i>Kabuli</i>    | Ca_Kabuli_Scaffold1751       | 625396                         | (G/A)       |
| 14812       | CakSNP14812    | <i>Kabuli</i>    | Ca_Kabuli_Scaffold1776       | 740                            | (C/T)       |
| 14813       | CakSNP14813    | <i>Kabuli</i>    | Ca_Kabuli_Scaffold1777       | 164715                         | (G/A)       |
| 14814       | CakSNP14814    | <i>Kabuli</i>    | Ca_Kabuli_Scaffold1777       | 164722                         | (C/G)       |
| 14815       | CakSNP14815    | <i>Kabuli</i>    | Ca_Kabuli_Scaffold1777       | 164747                         | (G/A)       |
| 14816       | CakSNP14816    | <i>Kabuli</i>    | Ca_Kabuli_Scaffold1777       | 164791                         | (T/G)       |
| 14817       | CakSNP14817    | <i>Kabuli</i>    | Ca_Kabuli_Scaffold1777       | 164758                         | (C/T)       |
| 14818       | CakSNP14818    | <i>Kabuli</i>    | Ca_Kabuli_Scaffold1777       | 164753                         | (A/G)       |
| 14819       | CakSNP14819    | <i>Kabuli</i>    | Ca_Kabuli_Scaffold1777       | 164730                         | (T/G)       |



| <b>S.N.</b> | <b>SNP IDs</b> | <b>Cultivars</b> | <b>Chromosomes/scaffolds</b> | <b>Physical positions (bp)</b> | <b>SNPs</b> |
|-------------|----------------|------------------|------------------------------|--------------------------------|-------------|
| 14820       | CakSNP14820    | <i>Kabuli</i>    | Ca_Kabuli_Scaffold1777       | 169037                         | (G/T)       |
| 14821       | CakSNP14821    | <i>Kabuli</i>    | Ca_Kabuli_Scaffold1777       | 343173                         | (C/T)       |
| 14822       | CakSNP14822    | <i>Kabuli</i>    | Ca_Kabuli_Scaffold1777       | 343185                         | (G/A)       |
| 14823       | CakSNP14823    | <i>Kabuli</i>    | Ca_Kabuli_Scaffold1777       | 448166                         | (A/G)       |
| 14824       | CakSNP14824    | <i>Kabuli</i>    | Ca_Kabuli_Scaffold1777       | 448176                         | (C/T)       |
| 14825       | CakSNP14825    | <i>Kabuli</i>    | Ca_Kabuli_Scaffold1777       | 448187                         | (G/T)       |
| 14826       | CakSNP14826    | <i>Kabuli</i>    | Ca_Kabuli_Scaffold1777       | 448216                         | (C/T)       |
| 14827       | CakSNP14827    | <i>Kabuli</i>    | Ca_Kabuli_Scaffold1779       | 957                            | (G/A)       |
| 14828       | CakSNP14828    | <i>Kabuli</i>    | Ca_Kabuli_Scaffold1779       | 896                            | (A/G)       |
| 14829       | CakSNP14829    | <i>Kabuli</i>    | Ca_Kabuli_Scaffold1779       | 890                            | (G/A)       |
| 14830       | CakSNP14830    | <i>Kabuli</i>    | Ca_Kabuli_Scaffold1802       | 17068                          | (A/G)       |
| 14831       | CakSNP14831    | <i>Kabuli</i>    | Ca_Kabuli_Scaffold1802       | 17033                          | (A/G)       |
| 14832       | CakSNP14832    | <i>Kabuli</i>    | Ca_Kabuli_Scaffold1802       | 17111                          | (C/T)       |
| 14833       | CakSNP14833    | <i>Kabuli</i>    | Ca_Kabuli_Scaffold1802       | 17117                          | (T/C)       |
| 14834       | CakSNP14834    | <i>Kabuli</i>    | Ca_Kabuli_Scaffold1802       | 17120                          | (C/T)       |
| 14835       | CakSNP14835    | <i>Kabuli</i>    | Ca_Kabuli_Scaffold1802       | 17123                          | (G/T)       |
| 14836       | CakSNP14836    | <i>Kabuli</i>    | Ca_Kabuli_Scaffold1802       | 17132                          | (C/T)       |
| 14837       | CakSNP14837    | <i>Kabuli</i>    | Ca_Kabuli_Scaffold1802       | 17150                          | (T/C)       |
| 14838       | CakSNP14838    | <i>Kabuli</i>    | Ca_Kabuli_Scaffold1802       | 17151                          | (T/C)       |
| 14839       | CakSNP14839    | <i>Kabuli</i>    | Ca_Kabuli_Scaffold1802       | 17168                          | (T/C)       |
| 14840       | CakSNP14840    | <i>Kabuli</i>    | Ca_Kabuli_Scaffold1802       | 17177                          | (T/A)       |
| 14841       | CakSNP14841    | <i>Kabuli</i>    | Ca_Kabuli_Scaffold1835       | 9398                           | (C/A)       |
| 14842       | CakSNP14842    | <i>Kabuli</i>    | Ca_Kabuli_Scaffold1835       | 10541                          | (C/G)       |
| 14843       | CakSNP14843    | <i>Kabuli</i>    | Ca_Kabuli_Scaffold1835       | 10563                          | (T/C)       |
| 14844       | CakSNP14844    | <i>Kabuli</i>    | Ca_Kabuli_Scaffold1844       | 41899                          | (C/A)       |
| 14845       | CakSNP14845    | <i>Kabuli</i>    | Ca_Kabuli_Scaffold1845       | 16292                          | (C/G)       |
| 14846       | CakSNP14846    | <i>Kabuli</i>    | Ca_Kabuli_Scaffold1845       | 16317                          | (C/G)       |
| 14847       | CakSNP14847    | <i>Kabuli</i>    | Ca_Kabuli_Scaffold1845       | 40886                          | (T/A)       |
| 14848       | CakSNP14848    | <i>Kabuli</i>    | Ca_Kabuli_Scaffold1845       | 40872                          | (T/G)       |
| 14849       | CakSNP14849    | <i>Kabuli</i>    | Ca_Kabuli_Scaffold1845       | 40871                          | (T/A)       |
| 14850       | CakSNP14850    | <i>Kabuli</i>    | Ca_Kabuli_Scaffold1845       | 40842                          | (T/G)       |
| 14851       | CakSNP14851    | <i>Kabuli</i>    | Ca_Kabuli_Scaffold1845       | 40821                          | (T/G)       |
| 14852       | CakSNP14852    | <i>Kabuli</i>    | Ca_Kabuli_Scaffold1848       | 583                            | (A/G)       |
| 14853       | CakSNP14853    | <i>Kabuli</i>    | Ca_Kabuli_Scaffold1848       | 565                            | (T/C)       |
| 14854       | CakSNP14854    | <i>Kabuli</i>    | Ca_Kabuli_Scaffold1848       | 562                            | (G/C)       |
| 14855       | CakSNP14855    | <i>Kabuli</i>    | Ca_Kabuli_Scaffold1848       | 532                            | (G/C)       |
| 14856       | CakSNP14856    | <i>Kabuli</i>    | Ca_Kabuli_Scaffold186        | 11965                          | (A/G)       |
| 14857       | CakSNP14857    | <i>Kabuli</i>    | Ca_Kabuli_Scaffold186        | 279942                         | (A/G)       |

| <b>S.N.</b> | <b>SNP IDs</b> | <b>Cultivars</b> | <b>Chromosomes/scaffolds</b> | <b>Physical positions (bp)</b> | <b>SNPs</b> |
|-------------|----------------|------------------|------------------------------|--------------------------------|-------------|
| 14858       | CakSNP14858    | <i>Kabuli</i>    | Ca_Kabuli_Scaffold186        | 280062                         | (T/C)       |
| 14859       | CakSNP14859    | <i>Kabuli</i>    | Ca_Kabuli_Scaffold186        | 280047                         | (A/G)       |
| 14860       | CakSNP14860    | <i>Kabuli</i>    | Ca_Kabuli_Scaffold186        | 280023                         | (C/T)       |
| 14861       | CakSNP14861    | <i>Kabuli</i>    | Ca_Kabuli_Scaffold186        | 280015                         | (T/C)       |
| 14862       | CakSNP14862    | <i>Kabuli</i>    | Ca_Kabuli_Scaffold186        | 280009                         | (G/T)       |
| 14863       | CakSNP14863    | <i>Kabuli</i>    | Ca_Kabuli_Scaffold1866       | 106318                         | (T/A)       |
| 14864       | CakSNP14864    | <i>Kabuli</i>    | Ca_Kabuli_Scaffold1866       | 106330                         | (A/T)       |
| 14865       | CakSNP14865    | <i>Kabuli</i>    | Ca_Kabuli_Scaffold1866       | 106371                         | (C/A)       |
| 14866       | CakSNP14866    | <i>Kabuli</i>    | Ca_Kabuli_Scaffold1866       | 106374                         | (A/T)       |
| 14867       | CakSNP14867    | <i>Kabuli</i>    | Ca_Kabuli_Scaffold1866       | 106402                         | (C/T)       |
| 14868       | CakSNP14868    | <i>Kabuli</i>    | Ca_Kabuli_Scaffold1866       | 110550                         | (A/G)       |
| 14869       | CakSNP14869    | <i>Kabuli</i>    | Ca_Kabuli_Scaffold1866       | 110570                         | (G/A)       |
| 14870       | CakSNP14870    | <i>Kabuli</i>    | Ca_Kabuli_Scaffold1866       | 110578                         | (C/A)       |
| 14871       | CakSNP14871    | <i>Kabuli</i>    | Ca_Kabuli_Scaffold1899       | 148                            | (T/G)       |
| 14872       | CakSNP14872    | <i>Kabuli</i>    | Ca_Kabuli_Scaffold1899       | 187                            | (A/G)       |
| 14873       | CakSNP14873    | <i>Kabuli</i>    | Ca_Kabuli_Scaffold1899       | 267                            | (T/A)       |
| 14874       | CakSNP14874    | <i>Kabuli</i>    | Ca_Kabuli_Scaffold1899       | 200                            | (G/A)       |
| 14875       | CakSNP14875    | <i>Kabuli</i>    | Ca_Kabuli_Scaffold1918       | 216231                         | (T/G)       |
| 14876       | CakSNP14876    | <i>Kabuli</i>    | Ca_Kabuli_Scaffold1918       | 216213                         | (T/C)       |
| 14877       | CakSNP14877    | <i>Kabuli</i>    | Ca_Kabuli_Scaffold1918       | 216180                         | (C/A)       |
| 14878       | CakSNP14878    | <i>Kabuli</i>    | Ca_Kabuli_Scaffold1918       | 237787                         | (G/A)       |
| 14879       | CakSNP14879    | <i>Kabuli</i>    | Ca_Kabuli_Scaffold1918       | 245929                         | (T/C)       |
| 14880       | CakSNP14880    | <i>Kabuli</i>    | Ca_Kabuli_Scaffold1928       | 103092                         | (A/G)       |
| 14881       | CakSNP14881    | <i>Kabuli</i>    | Ca_Kabuli_Scaffold1928       | 103114                         | (G/A)       |
| 14882       | CakSNP14882    | <i>Kabuli</i>    | Ca_Kabuli_Scaffold193        | 38279                          | (C/A)       |
| 14883       | CakSNP14883    | <i>Kabuli</i>    | Ca_Kabuli_Scaffold193        | 186538                         | (C/T)       |
| 14884       | CakSNP14884    | <i>Kabuli</i>    | Ca_Kabuli_Scaffold193        | 186523                         | (T/C)       |
| 14885       | CakSNP14885    | <i>Kabuli</i>    | Ca_Kabuli_Scaffold193        | 186515                         | (T/G)       |
| 14886       | CakSNP14886    | <i>Kabuli</i>    | Ca_Kabuli_Scaffold193        | 186510                         | (C/A)       |
| 14887       | CakSNP14887    | <i>Kabuli</i>    | Ca_Kabuli_Scaffold193        | 186584                         | (A/G)       |
| 14888       | CakSNP14888    | <i>Kabuli</i>    | Ca_Kabuli_Scaffold193        | 186582                         | (C/A)       |
| 14889       | CakSNP14889    | <i>Kabuli</i>    | Ca_Kabuli_Scaffold193        | 186587                         | (G/T)       |
| 14890       | CakSNP14890    | <i>Kabuli</i>    | Ca_Kabuli_Scaffold193        | 186588                         | (C/G)       |
| 14891       | CakSNP14891    | <i>Kabuli</i>    | Ca_Kabuli_Scaffold193        | 186595                         | (C/T)       |
| 14892       | CakSNP14892    | <i>Kabuli</i>    | Ca_Kabuli_Scaffold193        | 186598                         | (A/G)       |
| 14893       | CakSNP14893    | <i>Kabuli</i>    | Ca_Kabuli_Scaffold193        | 186611                         | (G/A)       |
| 14894       | CakSNP14894    | <i>Kabuli</i>    | Ca_Kabuli_Scaffold193        | 186639                         | (C/T)       |
| 14895       | CakSNP14895    | <i>Kabuli</i>    | Ca_Kabuli_Scaffold193        | 186651                         | (T/C)       |

| <b>S.N.</b> | <b>SNP IDs</b> | <b>Cultivars</b> | <b>Chromosomes/scaffolds</b> | <b>Physical positions (bp)</b> | <b>SNPs</b> |
|-------------|----------------|------------------|------------------------------|--------------------------------|-------------|
| 14896       | CakSNP14896    | <i>Kabuli</i>    | Ca_Kabuli_Scaffold193        | 186657                         | (G/A)       |
| 14897       | CakSNP14897    | <i>Kabuli</i>    | Ca_Kabuli_Scaffold193        | 186661                         | (T/C)       |
| 14898       | CakSNP14898    | <i>Kabuli</i>    | Ca_Kabuli_Scaffold193        | 242763                         | (T/C)       |
| 14899       | CakSNP14899    | <i>Kabuli</i>    | Ca_Kabuli_Scaffold193        | 242733                         | (G/T)       |
| 14900       | CakSNP14900    | <i>Kabuli</i>    | Ca_Kabuli_Scaffold193        | 244735                         | (T/G)       |
| 14901       | CakSNP14901    | <i>Kabuli</i>    | Ca_Kabuli_Scaffold1943       | 163784                         | (G/A)       |
| 14902       | CakSNP14902    | <i>Kabuli</i>    | Ca_Kabuli_Scaffold1943       | 163780                         | (C/T)       |
| 14903       | CakSNP14903    | <i>Kabuli</i>    | Ca_Kabuli_Scaffold1959       | 84160                          | (G/A)       |
| 14904       | CakSNP14904    | <i>Kabuli</i>    | Ca_Kabuli_Scaffold1964       | 54613                          | (G/A)       |
| 14905       | CakSNP14905    | <i>Kabuli</i>    | Ca_Kabuli_Scaffold1964       | 54604                          | (T/C)       |
| 14906       | CakSNP14906    | <i>Kabuli</i>    | Ca_Kabuli_Scaffold1964       | 67416                          | (G/C)       |
| 14907       | CakSNP14907    | <i>Kabuli</i>    | Ca_Kabuli_Scaffold198        | 631160                         | (G/A)       |
| 14908       | CakSNP14908    | <i>Kabuli</i>    | Ca_Kabuli_Scaffold198        | 631174                         | (C/T)       |
| 14909       | CakSNP14909    | <i>Kabuli</i>    | Ca_Kabuli_Scaffold198        | 631185                         | (G/A)       |
| 14910       | CakSNP14910    | <i>Kabuli</i>    | Ca_Kabuli_Scaffold198        | 641266                         | (C/T)       |
| 14911       | CakSNP14911    | <i>Kabuli</i>    | Ca_Kabuli_Scaffold198        | 641252                         | (A/G)       |
| 14912       | CakSNP14912    | <i>Kabuli</i>    | Ca_Kabuli_Scaffold198        | 641243                         | (A/G)       |
| 14913       | CakSNP14913    | <i>Kabuli</i>    | Ca_Kabuli_Scaffold1981       | 265110                         | (A/C)       |
| 14914       | CakSNP14914    | <i>Kabuli</i>    | Ca_Kabuli_Scaffold1981       | 265126                         | (G/T)       |
| 14915       | CakSNP14915    | <i>Kabuli</i>    | Ca_Kabuli_Scaffold1981       | 265216                         | (A/G)       |
| 14916       | CakSNP14916    | <i>Kabuli</i>    | Ca_Kabuli_Scaffold1981       | 265191                         | (T/G)       |
| 14917       | CakSNP14917    | <i>Kabuli</i>    | Ca_Kabuli_Scaffold1981       | 269879                         | (A/G)       |
| 14918       | CakSNP14918    | <i>Kabuli</i>    | Ca_Kabuli_Scaffold1981       | 385683                         | (T/A)       |
| 14919       | CakSNP14919    | <i>Kabuli</i>    | Ca_Kabuli_Scaffold1984       | 212011                         | (G/A)       |
| 14920       | CakSNP14920    | <i>Kabuli</i>    | Ca_Kabuli_Scaffold1984       | 215969                         | (G/C)       |
| 14921       | CakSNP14921    | <i>Kabuli</i>    | Ca_Kabuli_Scaffold1984       | 292507                         | (A/C)       |
| 14922       | CakSNP14922    | <i>Kabuli</i>    | Ca_Kabuli_Scaffold1984       | 292511                         | (G/C)       |
| 14923       | CakSNP14923    | <i>Kabuli</i>    | Ca_Kabuli_Scaffold1985       | 98611                          | (C/T)       |
| 14924       | CakSNP14924    | <i>Kabuli</i>    | Ca_Kabuli_Scaffold1985       | 98659                          | (C/T)       |
| 14925       | CakSNP14925    | <i>Kabuli</i>    | Ca_Kabuli_Scaffold1991       | 62009                          | (C/A)       |
| 14926       | CakSNP14926    | <i>Kabuli</i>    | Ca_Kabuli_Scaffold1991       | 62121                          | (G/A)       |
| 14927       | CakSNP14927    | <i>Kabuli</i>    | Ca_Kabuli_Scaffold1991       | 62085                          | (A/C)       |
| 14928       | CakSNP14928    | <i>Kabuli</i>    | Ca_Kabuli_Scaffold1991       | 62115                          | (G/A)       |
| 14929       | CakSNP14929    | <i>Kabuli</i>    | Ca_Kabuli_Scaffold1991       | 62131                          | (G/A)       |
| 14930       | CakSNP14930    | <i>Kabuli</i>    | Ca_Kabuli_Scaffold1991       | 62154                          | (T/A)       |
| 14931       | CakSNP14931    | <i>Kabuli</i>    | Ca_Kabuli_Scaffold1991       | 62147                          | (G/A)       |
| 14932       | CakSNP14932    | <i>Kabuli</i>    | Ca_Kabuli_Scaffold1991       | 62422                          | (G/A)       |
| 14933       | CakSNP14933    | <i>Kabuli</i>    | Ca_Kabuli_Scaffold2          | 137309                         | (T/G)       |

| <b>S.N.</b> | <b>SNP IDs</b> | <b>Cultivars</b> | <b>Chromosomes/scaffolds</b> | <b>Physical positions (bp)</b> | <b>SNPs</b> |
|-------------|----------------|------------------|------------------------------|--------------------------------|-------------|
| 14934       | CakSNP14934    | <i>Kabuli</i>    | Ca_Kabuli_Scaffold2          | 504258                         | (C/T)       |
| 14935       | CakSNP14935    | <i>Kabuli</i>    | Ca_Kabuli_Scaffold2          | 504253                         | (C/T)       |
| 14936       | CakSNP14936    | <i>Kabuli</i>    | Ca_Kabuli_Scaffold2          | 504248                         | (G/A)       |
| 14937       | CakSNP14937    | <i>Kabuli</i>    | Ca_Kabuli_Scaffold202        | 16084                          | (T/C)       |
| 14938       | CakSNP14938    | <i>Kabuli</i>    | Ca_Kabuli_Scaffold202        | 92532                          | (C/A)       |
| 14939       | CakSNP14939    | <i>Kabuli</i>    | Ca_Kabuli_Scaffold202        | 96456                          | (T/C)       |
| 14940       | CakSNP14940    | <i>Kabuli</i>    | Ca_Kabuli_Scaffold202        | 96444                          | (G/A)       |
| 14941       | CakSNP14941    | <i>Kabuli</i>    | Ca_Kabuli_Scaffold202        | 96532                          | (G/T)       |
| 14942       | CakSNP14942    | <i>Kabuli</i>    | Ca_Kabuli_Scaffold202        | 96589                          | (A/T)       |
| 14943       | CakSNP14943    | <i>Kabuli</i>    | Ca_Kabuli_Scaffold202        | 96580                          | (T/G)       |
| 14944       | CakSNP14944    | <i>Kabuli</i>    | Ca_Kabuli_Scaffold202        | 96576                          | (A/G)       |
| 14945       | CakSNP14945    | <i>Kabuli</i>    | Ca_Kabuli_Scaffold202        | 99123                          | (C/T)       |
| 14946       | CakSNP14946    | <i>Kabuli</i>    | Ca_Kabuli_Scaffold2027       | 100867                         | (G/C)       |
| 14947       | CakSNP14947    | <i>Kabuli</i>    | Ca_Kabuli_Scaffold2027       | 152763                         | (C/A)       |
| 14948       | CakSNP14948    | <i>Kabuli</i>    | Ca_Kabuli_Scaffold2030       | 13855                          | (G/A)       |
| 14949       | CakSNP14949    | <i>Kabuli</i>    | Ca_Kabuli_Scaffold2030       | 13822                          | (C/T)       |
| 14950       | CakSNP14950    | <i>Kabuli</i>    | Ca_Kabuli_Scaffold2030       | 13807                          | (G/A)       |
| 14951       | CakSNP14951    | <i>Kabuli</i>    | Ca_Kabuli_Scaffold2030       | 13889                          | (C/T)       |
| 14952       | CakSNP14952    | <i>Kabuli</i>    | Ca_Kabuli_Scaffold2030       | 13874                          | (G/T)       |
| 14953       | CakSNP14953    | <i>Kabuli</i>    | Ca_Kabuli_Scaffold2033       | 115044                         | (C/T)       |
| 14954       | CakSNP14954    | <i>Kabuli</i>    | Ca_Kabuli_Scaffold2033       | 118686                         | (C/T)       |
| 14955       | CakSNP14955    | <i>Kabuli</i>    | Ca_Kabuli_Scaffold2033       | 118779                         | (G/T)       |
| 14956       | CakSNP14956    | <i>Kabuli</i>    | Ca_Kabuli_Scaffold2033       | 118760                         | (T/G)       |
| 14957       | CakSNP14957    | <i>Kabuli</i>    | Ca_Kabuli_Scaffold2033       | 119057                         | (T/G)       |
| 14958       | CakSNP14958    | <i>Kabuli</i>    | Ca_Kabuli_Scaffold2033       | 119166                         | (T/C)       |
| 14959       | CakSNP14959    | <i>Kabuli</i>    | Ca_Kabuli_Scaffold2033       | 119645                         | (G/A)       |
| 14960       | CakSNP14960    | <i>Kabuli</i>    | Ca_Kabuli_Scaffold2033       | 119648                         | (G/A)       |
| 14961       | CakSNP14961    | <i>Kabuli</i>    | Ca_Kabuli_Scaffold2033       | 119703                         | (C/T)       |
| 14962       | CakSNP14962    | <i>Kabuli</i>    | Ca_Kabuli_Scaffold2033       | 119715                         | (G/T)       |
| 14963       | CakSNP14963    | <i>Kabuli</i>    | Ca_Kabuli_Scaffold2033       | 119728                         | (G/A)       |
| 14964       | CakSNP14964    | <i>Kabuli</i>    | Ca_Kabuli_Scaffold2039       | 116734                         | (A/G)       |
| 14965       | CakSNP14965    | <i>Kabuli</i>    | Ca_Kabuli_Scaffold2040       | 139597                         | (A/G)       |
| 14966       | CakSNP14966    | <i>Kabuli</i>    | Ca_Kabuli_Scaffold2040       | 139585                         | (A/C)       |
| 14967       | CakSNP14967    | <i>Kabuli</i>    | Ca_Kabuli_Scaffold2040       | 139584                         | (G/A)       |
| 14968       | CakSNP14968    | <i>Kabuli</i>    | Ca_Kabuli_Scaffold2040       | 139581                         | (G/A)       |
| 14969       | CakSNP14969    | <i>Kabuli</i>    | Ca_Kabuli_Scaffold2040       | 139560                         | (G/T)       |
| 14970       | CakSNP14970    | <i>Kabuli</i>    | Ca_Kabuli_Scaffold2040       | 139550                         | (G/A)       |
| 14971       | CakSNP14971    | <i>Kabuli</i>    | Ca_Kabuli_Scaffold2040       | 139548                         | (C/T)       |

| <b>S.N.</b> | <b>SNP IDs</b> | <b>Cultivars</b> | <b>Chromosomes/scaffolds</b> | <b>Physical positions (bp)</b> | <b>SNPs</b> |
|-------------|----------------|------------------|------------------------------|--------------------------------|-------------|
| 14972       | CakSNP14972    | <i>Kabuli</i>    | Ca_Kabuli_Scaffold2040       | 139544                         | (C/A)       |
| 14973       | CakSNP14973    | <i>Kabuli</i>    | Ca_Kabuli_Scaffold2040       | 139541                         | (T/C)       |
| 14974       | CakSNP14974    | <i>Kabuli</i>    | Ca_Kabuli_Scaffold2040       | 139538                         | (G/A)       |
| 14975       | CakSNP14975    | <i>Kabuli</i>    | Ca_Kabuli_Scaffold2040       | 139545                         | (G/A)       |
| 14976       | CakSNP14976    | <i>Kabuli</i>    | Ca_Kabuli_Scaffold2040       | 139603                         | (C/T)       |
| 14977       | CakSNP14977    | <i>Kabuli</i>    | Ca_Kabuli_Scaffold205        | 74448                          | (T/G)       |
| 14978       | CakSNP14978    | <i>Kabuli</i>    | Ca_Kabuli_Scaffold205        | 74430                          | (A/G)       |
| 14979       | CakSNP14979    | <i>Kabuli</i>    | Ca_Kabuli_Scaffold205        | 74397                          | (G/A)       |
| 14980       | CakSNP14980    | <i>Kabuli</i>    | Ca_Kabuli_Scaffold205        | 74399                          | (C/T)       |
| 14981       | CakSNP14981    | <i>Kabuli</i>    | Ca_Kabuli_Scaffold205        | 74424                          | (T/C)       |
| 14982       | CakSNP14982    | <i>Kabuli</i>    | Ca_Kabuli_Scaffold205        | 74432                          | (G/A)       |
| 14983       | CakSNP14983    | <i>Kabuli</i>    | Ca_Kabuli_Scaffold205        | 74433                          | (G/A)       |
| 14984       | CakSNP14984    | <i>Kabuli</i>    | Ca_Kabuli_Scaffold206        | 58349                          | (C/A)       |
| 14985       | CakSNP14985    | <i>Kabuli</i>    | Ca_Kabuli_Scaffold206        | 62985                          | (G/A)       |
| 14986       | CakSNP14986    | <i>Kabuli</i>    | Ca_Kabuli_Scaffold208        | 344503                         | (G/T)       |
| 14987       | CakSNP14987    | <i>Kabuli</i>    | Ca_Kabuli_Scaffold208        | 344515                         | (A/G)       |
| 14988       | CakSNP14988    | <i>Kabuli</i>    | Ca_Kabuli_Scaffold208        | 344519                         | (A/T)       |
| 14989       | CakSNP14989    | <i>Kabuli</i>    | Ca_Kabuli_Scaffold208        | 344533                         | (C/T)       |
| 14990       | CakSNP14990    | <i>Kabuli</i>    | Ca_Kabuli_Scaffold208        | 344556                         | (T/G)       |
| 14991       | CakSNP14991    | <i>Kabuli</i>    | Ca_Kabuli_Scaffold2097       | 54210                          | (A/C)       |
| 14992       | CakSNP14992    | <i>Kabuli</i>    | Ca_Kabuli_Scaffold210        | 293799                         | (G/A)       |
| 14993       | CakSNP14993    | <i>Kabuli</i>    | Ca_Kabuli_Scaffold210        | 355284                         | (G/T)       |
| 14994       | CakSNP14994    | <i>Kabuli</i>    | Ca_Kabuli_Scaffold210        | 533483                         | (G/A)       |
| 14995       | CakSNP14995    | <i>Kabuli</i>    | Ca_Kabuli_Scaffold210        | 533416                         | (G/A)       |
| 14996       | CakSNP14996    | <i>Kabuli</i>    | Ca_Kabuli_Scaffold210        | 617431                         | (T/A)       |
| 14997       | CakSNP14997    | <i>Kabuli</i>    | Ca_Kabuli_Scaffold2104       | 61757                          | (T/C)       |
| 14998       | CakSNP14998    | <i>Kabuli</i>    | Ca_Kabuli_Scaffold2104       | 61745                          | (T/G)       |
| 14999       | CakSNP14999    | <i>Kabuli</i>    | Ca_Kabuli_Scaffold2104       | 61734                          | (T/G)       |
| 15000       | CakSNP15000    | <i>Kabuli</i>    | Ca_Kabuli_Scaffold2104       | 61723                          | (G/A)       |
| 15001       | CakSNP15001    | <i>Kabuli</i>    | Ca_Kabuli_Scaffold2104       | 61710                          | (C/T)       |
| 15002       | CakSNP15002    | <i>Kabuli</i>    | Ca_Kabuli_Scaffold2104       | 61705                          | (C/T)       |
| 15003       | CakSNP15003    | <i>Kabuli</i>    | Ca_Kabuli_Scaffold2152       | 372404                         | (A/T)       |
| 15004       | CakSNP15004    | <i>Kabuli</i>    | Ca_Kabuli_Scaffold2166       | 228653                         | (G/C)       |
| 15005       | CakSNP15005    | <i>Kabuli</i>    | Ca_Kabuli_Scaffold2166       | 228710                         | (G/A)       |
| 15006       | CakSNP15006    | <i>Kabuli</i>    | Ca_Kabuli_Scaffold2170       | 4821                           | (G/A)       |
| 15007       | CakSNP15007    | <i>Kabuli</i>    | Ca_Kabuli_Scaffold2192       | 67485                          | (A/G)       |
| 15008       | CakSNP15008    | <i>Kabuli</i>    | Ca_Kabuli_Scaffold2192       | 67589                          | (A/C)       |
| 15009       | CakSNP15009    | <i>Kabuli</i>    | Ca_Kabuli_Scaffold221        | 53841                          | (T/G)       |

| <b>S.N.</b> | <b>SNP IDs</b> | <b>Cultivars</b> | <b>Chromosomes/scaffolds</b> | <b>Physical positions (bp)</b> | <b>SNPs</b> |
|-------------|----------------|------------------|------------------------------|--------------------------------|-------------|
| 15010       | CakSNP15010    | <i>Kabuli</i>    | Ca_Kabuli_Scaffold2248       | 5538                           | (A/T)       |
| 15011       | CakSNP15011    | <i>Kabuli</i>    | Ca_Kabuli_Scaffold2248       | 5562                           | (C/T)       |
| 15012       | CakSNP15012    | <i>Kabuli</i>    | Ca_Kabuli_Scaffold2248       | 5570                           | (T/C)       |
| 15013       | CakSNP15013    | <i>Kabuli</i>    | Ca_Kabuli_Scaffold2248       | 5520                           | (C/A)       |
| 15014       | CakSNP15014    | <i>Kabuli</i>    | Ca_Kabuli_Scaffold2249       | 4446                           | (A/C)       |
| 15015       | CakSNP15015    | <i>Kabuli</i>    | Ca_Kabuli_Scaffold2269       | 58091                          | (A/T)       |
| 15016       | CakSNP15016    | <i>Kabuli</i>    | Ca_Kabuli_Scaffold2269       | 123799                         | (A/C)       |
| 15017       | CakSNP15017    | <i>Kabuli</i>    | Ca_Kabuli_Scaffold2269       | 126013                         | (A/C)       |
| 15018       | CakSNP15018    | <i>Kabuli</i>    | Ca_Kabuli_Scaffold2301       | 70721                          | (A/G)       |
| 15019       | CakSNP15019    | <i>Kabuli</i>    | Ca_Kabuli_Scaffold2330       | 27894                          | (A/C)       |
| 15020       | CakSNP15020    | <i>Kabuli</i>    | Ca_Kabuli_Scaffold2330       | 64157                          | (T/C)       |
| 15021       | CakSNP15021    | <i>Kabuli</i>    | Ca_Kabuli_Scaffold2330       | 65482                          | (T/G)       |
| 15022       | CakSNP15022    | <i>Kabuli</i>    | Ca_Kabuli_Scaffold2330       | 65617                          | (G/A)       |
| 15023       | CakSNP15023    | <i>Kabuli</i>    | Ca_Kabuli_Scaffold2330       | 65650                          | (C/T)       |
| 15024       | CakSNP15024    | <i>Kabuli</i>    | Ca_Kabuli_Scaffold2330       | 83061                          | (C/T)       |
| 15025       | CakSNP15025    | <i>Kabuli</i>    | Ca_Kabuli_Scaffold2330       | 83064                          | (A/G)       |
| 15026       | CakSNP15026    | <i>Kabuli</i>    | Ca_Kabuli_Scaffold2330       | 83077                          | (G/C)       |
| 15027       | CakSNP15027    | <i>Kabuli</i>    | Ca_Kabuli_Scaffold2330       | 83112                          | (A/G)       |
| 15028       | CakSNP15028    | <i>Kabuli</i>    | Ca_Kabuli_Scaffold2330       | 83116                          | (G/T)       |
| 15029       | CakSNP15029    | <i>Kabuli</i>    | Ca_Kabuli_Scaffold235        | 67258                          | (G/T)       |
| 15030       | CakSNP15030    | <i>Kabuli</i>    | Ca_Kabuli_Scaffold2371       | 139149                         | (A/G)       |
| 15031       | CakSNP15031    | <i>Kabuli</i>    | Ca_Kabuli_Scaffold2373       | 3818                           | (A/G)       |
| 15032       | CakSNP15032    | <i>Kabuli</i>    | Ca_Kabuli_Scaffold2373       | 3815                           | (T/A)       |
| 15033       | CakSNP15033    | <i>Kabuli</i>    | Ca_Kabuli_Scaffold2373       | 3811                           | (C/T)       |
| 15034       | CakSNP15034    | <i>Kabuli</i>    | Ca_Kabuli_Scaffold2373       | 3793                           | (C/T)       |
| 15035       | CakSNP15035    | <i>Kabuli</i>    | Ca_Kabuli_Scaffold2373       | 3923                           | (T/C)       |
| 15036       | CakSNP15036    | <i>Kabuli</i>    | Ca_Kabuli_Scaffold2373       | 3871                           | (A/T)       |
| 15037       | CakSNP15037    | <i>Kabuli</i>    | Ca_Kabuli_Scaffold2373       | 3862                           | (C/T)       |
| 15038       | CakSNP15038    | <i>Kabuli</i>    | Ca_Kabuli_Scaffold2373       | 12916                          | (C/A)       |
| 15039       | CakSNP15039    | <i>Kabuli</i>    | Ca_Kabuli_Scaffold2373       | 12969                          | (G/C)       |
| 15040       | CakSNP15040    | <i>Kabuli</i>    | Ca_Kabuli_Scaffold2373       | 12978                          | (A/T)       |
| 15041       | CakSNP15041    | <i>Kabuli</i>    | Ca_Kabuli_Scaffold2373       | 62495                          | (C/T)       |
| 15042       | CakSNP15042    | <i>Kabuli</i>    | Ca_Kabuli_Scaffold2373       | 62494                          | (A/G)       |
| 15043       | CakSNP15043    | <i>Kabuli</i>    | Ca_Kabuli_Scaffold2373       | 62473                          | (G/A)       |
| 15044       | CakSNP15044    | <i>Kabuli</i>    | Ca_Kabuli_Scaffold2373       | 62434                          | (G/A)       |
| 15045       | CakSNP15045    | <i>Kabuli</i>    | Ca_Kabuli_Scaffold2373       | 62433                          | (A/G)       |
| 15046       | CakSNP15046    | <i>Kabuli</i>    | Ca_Kabuli_Scaffold2373       | 127884                         | (A/C)       |
| 15047       | CakSNP15047    | <i>Kabuli</i>    | Ca_Kabuli_Scaffold2373       | 127851                         | (C/T)       |

| <b>S.N.</b> | <b>SNP IDs</b> | <b>Cultivars</b> | <b>Chromosomes/scaffolds</b> | <b>Physical positions (bp)</b> | <b>SNPs</b> |
|-------------|----------------|------------------|------------------------------|--------------------------------|-------------|
| 15048       | CakSNP15048    | <i>Kabuli</i>    | Ca_Kabuli_Scaffold2373       | 127905                         | (C/T)       |
| 15049       | CakSNP15049    | <i>Kabuli</i>    | Ca_Kabuli_Scaffold2373       | 127870                         | (T/G)       |
| 15050       | CakSNP15050    | <i>Kabuli</i>    | Ca_Kabuli_Scaffold2373       | 127855                         | (A/C)       |
| 15051       | CakSNP15051    | <i>Kabuli</i>    | Ca_Kabuli_Scaffold2392       | 35402                          | (A/C)       |
| 15052       | CakSNP15052    | <i>Kabuli</i>    | Ca_Kabuli_Scaffold2392       | 198120                         | (G/T)       |
| 15053       | CakSNP15053    | <i>Kabuli</i>    | Ca_Kabuli_Scaffold2392       | 314304                         | (T/C)       |
| 15054       | CakSNP15054    | <i>Kabuli</i>    | Ca_Kabuli_Scaffold2392       | 314322                         | (T/C)       |
| 15055       | CakSNP15055    | <i>Kabuli</i>    | Ca_Kabuli_Scaffold2392       | 314323                         | (G/A)       |
| 15056       | CakSNP15056    | <i>Kabuli</i>    | Ca_Kabuli_Scaffold2392       | 314343                         | (G/A)       |
| 15057       | CakSNP15057    | <i>Kabuli</i>    | Ca_Kabuli_Scaffold2392       | 314344                         | (T/C)       |
| 15058       | CakSNP15058    | <i>Kabuli</i>    | Ca_Kabuli_Scaffold2392       | 314349                         | (C/G)       |
| 15059       | CakSNP15059    | <i>Kabuli</i>    | Ca_Kabuli_Scaffold2392       | 314353                         | (G/A)       |
| 15060       | CakSNP15060    | <i>Kabuli</i>    | Ca_Kabuli_Scaffold2392       | 314345                         | (G/A)       |
| 15061       | CakSNP15061    | <i>Kabuli</i>    | Ca_Kabuli_Scaffold2392       | 314401                         | (A/C)       |
| 15062       | CakSNP15062    | <i>Kabuli</i>    | Ca_Kabuli_Scaffold240        | 6231                           | (T/A)       |
| 15063       | CakSNP15063    | <i>Kabuli</i>    | Ca_Kabuli_Scaffold240        | 6193                           | (G/A)       |
| 15064       | CakSNP15064    | <i>Kabuli</i>    | Ca_Kabuli_Scaffold240        | 6152                           | (C/T)       |
| 15065       | CakSNP15065    | <i>Kabuli</i>    | Ca_Kabuli_Scaffold240        | 119157                         | (G/A)       |
| 15066       | CakSNP15066    | <i>Kabuli</i>    | Ca_Kabuli_Scaffold240        | 119301                         | (T/C)       |
| 15067       | CakSNP15067    | <i>Kabuli</i>    | Ca_Kabuli_Scaffold240        | 119297                         | (C/A)       |
| 15068       | CakSNP15068    | <i>Kabuli</i>    | Ca_Kabuli_Scaffold240        | 119278                         | (T/C)       |
| 15069       | CakSNP15069    | <i>Kabuli</i>    | Ca_Kabuli_Scaffold240        | 119269                         | (C/T)       |
| 15070       | CakSNP15070    | <i>Kabuli</i>    | Ca_Kabuli_Scaffold240        | 119267                         | (G/C)       |
| 15071       | CakSNP15071    | <i>Kabuli</i>    | Ca_Kabuli_Scaffold240        | 119265                         | (C/G)       |
| 15072       | CakSNP15072    | <i>Kabuli</i>    | Ca_Kabuli_Scaffold2415       | 117840                         | (A/G)       |
| 15073       | CakSNP15073    | <i>Kabuli</i>    | Ca_Kabuli_Scaffold2415       | 117871                         | (A/C)       |
| 15074       | CakSNP15074    | <i>Kabuli</i>    | Ca_Kabuli_Scaffold2415       | 117882                         | (A/G)       |
| 15075       | CakSNP15075    | <i>Kabuli</i>    | Ca_Kabuli_Scaffold2415       | 117970                         | (G/A)       |
| 15076       | CakSNP15076    | <i>Kabuli</i>    | Ca_Kabuli_Scaffold242        | 293872                         | (A/G)       |
| 15077       | CakSNP15077    | <i>Kabuli</i>    | Ca_Kabuli_Scaffold250        | 38270                          | (A/G)       |
| 15078       | CakSNP15078    | <i>Kabuli</i>    | Ca_Kabuli_Scaffold2501       | 287                            | (C/T)       |
| 15079       | CakSNP15079    | <i>Kabuli</i>    | Ca_Kabuli_Scaffold2501       | 282                            | (C/A)       |
| 15080       | CakSNP15080    | <i>Kabuli</i>    | Ca_Kabuli_Scaffold2501       | 251                            | (T/G)       |
| 15081       | CakSNP15081    | <i>Kabuli</i>    | Ca_Kabuli_Scaffold2501       | 242                            | (C/G)       |
| 15082       | CakSNP15082    | <i>Kabuli</i>    | Ca_Kabuli_Scaffold2516       | 58947                          | (T/C)       |
| 15083       | CakSNP15083    | <i>Kabuli</i>    | Ca_Kabuli_Scaffold2521       | 57762                          | (T/C)       |
| 15084       | CakSNP15084    | <i>Kabuli</i>    | Ca_Kabuli_Scaffold2521       | 57725                          | (G/A)       |
| 15085       | CakSNP15085    | <i>Kabuli</i>    | Ca_Kabuli_Scaffold2521       | 57709                          | (G/T)       |

| <b>S.N.</b> | <b>SNP IDs</b> | <b>Cultivars</b> | <b>Chromosomes/scaffolds</b> | <b>Physical positions (bp)</b> | <b>SNPs</b> |
|-------------|----------------|------------------|------------------------------|--------------------------------|-------------|
| 15086       | CakSNP15086    | <i>Kabuli</i>    | Ca_Kabuli_Scaffold2557       | 110378                         | (C/T)       |
| 15087       | CakSNP15087    | <i>Kabuli</i>    | Ca_Kabuli_Scaffold2557       | 110414                         | (T/G)       |
| 15088       | CakSNP15088    | <i>Kabuli</i>    | Ca_Kabuli_Scaffold2557       | 110437                         | (C/T)       |
| 15089       | CakSNP15089    | <i>Kabuli</i>    | Ca_Kabuli_Scaffold2557       | 110441                         | (T/A)       |
| 15090       | CakSNP15090    | <i>Kabuli</i>    | Ca_Kabuli_Scaffold2569       | 58152                          | (T/G)       |
| 15091       | CakSNP15091    | <i>Kabuli</i>    | Ca_Kabuli_Scaffold2575       | 101222                         | (C/T)       |
| 15092       | CakSNP15092    | <i>Kabuli</i>    | Ca_Kabuli_Scaffold2617       | 467848                         | (C/T)       |
| 15093       | CakSNP15093    | <i>Kabuli</i>    | Ca_Kabuli_Scaffold263        | 85006                          | (G/A)       |
| 15094       | CakSNP15094    | <i>Kabuli</i>    | Ca_Kabuli_Scaffold263        | 85003                          | (C/T)       |
| 15095       | CakSNP15095    | <i>Kabuli</i>    | Ca_Kabuli_Scaffold263        | 84998                          | (G/A)       |
| 15096       | CakSNP15096    | <i>Kabuli</i>    | Ca_Kabuli_Scaffold263        | 84976                          | (A/G)       |
| 15097       | CakSNP15097    | <i>Kabuli</i>    | Ca_Kabuli_Scaffold263        | 84970                          | (T/C)       |
| 15098       | CakSNP15098    | <i>Kabuli</i>    | Ca_Kabuli_Scaffold263        | 84952                          | (T/G)       |
| 15099       | CakSNP15099    | <i>Kabuli</i>    | Ca_Kabuli_Scaffold2720       | 30699                          | (C/T)       |
| 15100       | CakSNP15100    | <i>Kabuli</i>    | Ca_Kabuli_Scaffold2720       | 30701                          | (G/A)       |
| 15101       | CakSNP15101    | <i>Kabuli</i>    | Ca_Kabuli_Scaffold2720       | 30760                          | (T/C)       |
| 15102       | CakSNP15102    | <i>Kabuli</i>    | Ca_Kabuli_Scaffold2720       | 177550                         | (G/T)       |
| 15103       | CakSNP15103    | <i>Kabuli</i>    | Ca_Kabuli_Scaffold2720       | 177578                         | (T/C)       |
| 15104       | CakSNP15104    | <i>Kabuli</i>    | Ca_Kabuli_Scaffold2722       | 52416                          | (G/T)       |
| 15105       | CakSNP15105    | <i>Kabuli</i>    | Ca_Kabuli_Scaffold2722       | 52397                          | (G/T)       |
| 15106       | CakSNP15106    | <i>Kabuli</i>    | Ca_Kabuli_Scaffold2722       | 67309                          | (C/A)       |
| 15107       | CakSNP15107    | <i>Kabuli</i>    | Ca_Kabuli_Scaffold2722       | 75609                          | (A/G)       |
| 15108       | CakSNP15108    | <i>Kabuli</i>    | Ca_Kabuli_Scaffold2728       | 1371                           | (G/A)       |
| 15109       | CakSNP15109    | <i>Kabuli</i>    | Ca_Kabuli_Scaffold273        | 202514                         | (T/G)       |
| 15110       | CakSNP15110    | <i>Kabuli</i>    | Ca_Kabuli_Scaffold2738       | 1307                           | (G/A)       |
| 15111       | CakSNP15111    | <i>Kabuli</i>    | Ca_Kabuli_Scaffold275        | 208095                         | (G/A)       |
| 15112       | CakSNP15112    | <i>Kabuli</i>    | Ca_Kabuli_Scaffold275        | 208067                         | (C/A)       |
| 15113       | CakSNP15113    | <i>Kabuli</i>    | Ca_Kabuli_Scaffold275        | 208786                         | (G/C)       |
| 15114       | CakSNP15114    | <i>Kabuli</i>    | Ca_Kabuli_Scaffold275        | 230606                         | (A/G)       |
| 15115       | CakSNP15115    | <i>Kabuli</i>    | Ca_Kabuli_Scaffold275        | 347422                         | (C/A)       |
| 15116       | CakSNP15116    | <i>Kabuli</i>    | Ca_Kabuli_Scaffold275        | 347384                         | (G/A)       |
| 15117       | CakSNP15117    | <i>Kabuli</i>    | Ca_Kabuli_Scaffold275        | 347361                         | (C/T)       |
| 15118       | CakSNP15118    | <i>Kabuli</i>    | Ca_Kabuli_Scaffold275        | 479497                         | (C/T)       |
| 15119       | CakSNP15119    | <i>Kabuli</i>    | Ca_Kabuli_Scaffold275        | 562610                         | (C/T)       |
| 15120       | CakSNP15120    | <i>Kabuli</i>    | Ca_Kabuli_Scaffold2763       | 4688                           | (A/C)       |
| 15121       | CakSNP15121    | <i>Kabuli</i>    | Ca_Kabuli_Scaffold2763       | 4706                           | (G/T)       |
| 15122       | CakSNP15122    | <i>Kabuli</i>    | Ca_Kabuli_Scaffold2763       | 4719                           | (G/A)       |
| 15123       | CakSNP15123    | <i>Kabuli</i>    | Ca_Kabuli_Scaffold2763       | 4732                           | (C/G)       |



| <b>S.N.</b> | <b>SNP IDs</b> | <b>Cultivars</b> | <b>Chromosomes/scaffolds</b> | <b>Physical positions (bp)</b> | <b>SNPs</b> |
|-------------|----------------|------------------|------------------------------|--------------------------------|-------------|
| 15124       | CakSNP15124    | <i>Kabuli</i>    | Ca_Kabuli_Scaffold2763       | 4738                           | (C/G)       |
| 15125       | CakSNP15125    | <i>Kabuli</i>    | Ca_Kabuli_Scaffold2763       | 4804                           | (A/T)       |
| 15126       | CakSNP15126    | <i>Kabuli</i>    | Ca_Kabuli_Scaffold2763       | 4800                           | (T/A)       |
| 15127       | CakSNP15127    | <i>Kabuli</i>    | Ca_Kabuli_Scaffold2763       | 4787                           | (A/G)       |
| 15128       | CakSNP15128    | <i>Kabuli</i>    | Ca_Kabuli_Scaffold2763       | 4782                           | (C/T)       |
| 15129       | CakSNP15129    | <i>Kabuli</i>    | Ca_Kabuli_Scaffold2763       | 25756                          | (T/G)       |
| 15130       | CakSNP15130    | <i>Kabuli</i>    | Ca_Kabuli_Scaffold2763       | 25769                          | (A/G)       |
| 15131       | CakSNP15131    | <i>Kabuli</i>    | Ca_Kabuli_Scaffold2763       | 25771                          | (T/G)       |
| 15132       | CakSNP15132    | <i>Kabuli</i>    | Ca_Kabuli_Scaffold2763       | 43207                          | (G/A)       |
| 15133       | CakSNP15133    | <i>Kabuli</i>    | Ca_Kabuli_Scaffold2763       | 49533                          | (T/A)       |
| 15134       | CakSNP15134    | <i>Kabuli</i>    | Ca_Kabuli_Scaffold2763       | 82193                          | (C/A)       |
| 15135       | CakSNP15135    | <i>Kabuli</i>    | Ca_Kabuli_Scaffold2763       | 82232                          | (C/T)       |
| 15136       | CakSNP15136    | <i>Kabuli</i>    | Ca_Kabuli_Scaffold2763       | 82249                          | (G/A)       |
| 15137       | CakSNP15137    | <i>Kabuli</i>    | Ca_Kabuli_Scaffold2763       | 82250                          | (T/C)       |
| 15138       | CakSNP15138    | <i>Kabuli</i>    | Ca_Kabuli_Scaffold2763       | 82253                          | (G/C)       |
| 15139       | CakSNP15139    | <i>Kabuli</i>    | Ca_Kabuli_Scaffold2763       | 82262                          | (G/C)       |
| 15140       | CakSNP15140    | <i>Kabuli</i>    | Ca_Kabuli_Scaffold2763       | 82261                          | (C/G)       |
| 15141       | CakSNP15141    | <i>Kabuli</i>    | Ca_Kabuli_Scaffold2763       | 82265                          | (G/T)       |
| 15142       | CakSNP15142    | <i>Kabuli</i>    | Ca_Kabuli_Scaffold2763       | 82302                          | (T/A)       |
| 15143       | CakSNP15143    | <i>Kabuli</i>    | Ca_Kabuli_Scaffold2763       | 82319                          | (T/C)       |
| 15144       | CakSNP15144    | <i>Kabuli</i>    | Ca_Kabuli_Scaffold2763       | 82328                          | (A/G)       |
| 15145       | CakSNP15145    | <i>Kabuli</i>    | Ca_Kabuli_Scaffold2763       | 82342                          | (C/T)       |
| 15146       | CakSNP15146    | <i>Kabuli</i>    | Ca_Kabuli_Scaffold2763       | 82369                          | (G/A)       |
| 15147       | CakSNP15147    | <i>Kabuli</i>    | Ca_Kabuli_Scaffold2763       | 82417                          | (C/T)       |
| 15148       | CakSNP15148    | <i>Kabuli</i>    | Ca_Kabuli_Scaffold2763       | 82397                          | (T/C)       |
| 15149       | CakSNP15149    | <i>Kabuli</i>    | Ca_Kabuli_Scaffold2763       | 95823                          | (G/A)       |
| 15150       | CakSNP15150    | <i>Kabuli</i>    | Ca_Kabuli_Scaffold2763       | 99364                          | (A/G)       |
| 15151       | CakSNP15151    | <i>Kabuli</i>    | Ca_Kabuli_Scaffold2763       | 99368                          | (C/G)       |
| 15152       | CakSNP15152    | <i>Kabuli</i>    | Ca_Kabuli_Scaffold2763       | 99549                          | (C/A)       |
| 15153       | CakSNP15153    | <i>Kabuli</i>    | Ca_Kabuli_Scaffold2763       | 104549                         | (G/C)       |
| 15154       | CakSNP15154    | <i>Kabuli</i>    | Ca_Kabuli_Scaffold2763       | 104583                         | (T/C)       |
| 15155       | CakSNP15155    | <i>Kabuli</i>    | Ca_Kabuli_Scaffold2763       | 107087                         | (A/G)       |
| 15156       | CakSNP15156    | <i>Kabuli</i>    | Ca_Kabuli_Scaffold2763       | 107033                         | (T/A)       |
| 15157       | CakSNP15157    | <i>Kabuli</i>    | Ca_Kabuli_Scaffold2763       | 107314                         | (A/G)       |
| 15158       | CakSNP15158    | <i>Kabuli</i>    | Ca_Kabuli_Scaffold2763       | 107437                         | (T/C)       |
| 15159       | CakSNP15159    | <i>Kabuli</i>    | Ca_Kabuli_Scaffold2763       | 107376                         | (C/T)       |
| 15160       | CakSNP15160    | <i>Kabuli</i>    | Ca_Kabuli_Scaffold2763       | 107413                         | (A/G)       |
| 15161       | CakSNP15161    | <i>Kabuli</i>    | Ca_Kabuli_Scaffold2763       | 108560                         | (T/G)       |

| <b>S.N.</b> | <b>SNP IDs</b> | <b>Cultivars</b> | <b>Chromosomes/scaffolds</b> | <b>Physical positions (bp)</b> | <b>SNPs</b> |
|-------------|----------------|------------------|------------------------------|--------------------------------|-------------|
| 15162       | CakSNP15162    | <i>Kabuli</i>    | Ca_Kabuli_Scaffold2763       | 108599                         | (T/A)       |
| 15163       | CakSNP15163    | <i>Kabuli</i>    | Ca_Kabuli_Scaffold2763       | 108763                         | (T/G)       |
| 15164       | CakSNP15164    | <i>Kabuli</i>    | Ca_Kabuli_Scaffold2763       | 117440                         | (C/T)       |
| 15165       | CakSNP15165    | <i>Kabuli</i>    | Ca_Kabuli_Scaffold2763       | 117430                         | (A/C)       |
| 15166       | CakSNP15166    | <i>Kabuli</i>    | Ca_Kabuli_Scaffold2763       | 125716                         | (C/T)       |
| 15167       | CakSNP15167    | <i>Kabuli</i>    | Ca_Kabuli_Scaffold280        | 90875                          | (G/A)       |
| 15168       | CakSNP15168    | <i>Kabuli</i>    | Ca_Kabuli_Scaffold280        | 90950                          | (C/A)       |
| 15169       | CakSNP15169    | <i>Kabuli</i>    | Ca_Kabuli_Scaffold280        | 99357                          | (A/C)       |
| 15170       | CakSNP15170    | <i>Kabuli</i>    | Ca_Kabuli_Scaffold280        | 101752                         | (G/C)       |
| 15171       | CakSNP15171    | <i>Kabuli</i>    | Ca_Kabuli_Scaffold280        | 111160                         | (C/A)       |
| 15172       | CakSNP15172    | <i>Kabuli</i>    | Ca_Kabuli_Scaffold2812       | 56649                          | (C/T)       |
| 15173       | CakSNP15173    | <i>Kabuli</i>    | Ca_Kabuli_Scaffold2812       | 56658                          | (G/A)       |
| 15174       | CakSNP15174    | <i>Kabuli</i>    | Ca_Kabuli_Scaffold2812       | 56672                          | (C/G)       |
| 15175       | CakSNP15175    | <i>Kabuli</i>    | Ca_Kabuli_Scaffold2812       | 56702                          | (G/A)       |
| 15176       | CakSNP15176    | <i>Kabuli</i>    | Ca_Kabuli_Scaffold2812       | 56714                          | (G/C)       |
| 15177       | CakSNP15177    | <i>Kabuli</i>    | Ca_Kabuli_Scaffold2812       | 56648                          | (C/G)       |
| 15178       | CakSNP15178    | <i>Kabuli</i>    | Ca_Kabuli_Scaffold2812       | 89844                          | (A/C)       |
| 15179       | CakSNP15179    | <i>Kabuli</i>    | Ca_Kabuli_Scaffold2812       | 89940                          | (C/T)       |
| 15180       | CakSNP15180    | <i>Kabuli</i>    | Ca_Kabuli_Scaffold2812       | 89888                          | (T/A)       |
| 15181       | CakSNP15181    | <i>Kabuli</i>    | Ca_Kabuli_Scaffold2812       | 89887                          | (A/T)       |
| 15182       | CakSNP15182    | <i>Kabuli</i>    | Ca_Kabuli_Scaffold2815       | 25626                          | (C/G)       |
| 15183       | CakSNP15183    | <i>Kabuli</i>    | Ca_Kabuli_Scaffold2815       | 25655                          | (T/G)       |
| 15184       | CakSNP15184    | <i>Kabuli</i>    | Ca_Kabuli_Scaffold2815       | 25668                          | (T/G)       |
| 15185       | CakSNP15185    | <i>Kabuli</i>    | Ca_Kabuli_Scaffold2827       | 171                            | (C/T)       |
| 15186       | CakSNP15186    | <i>Kabuli</i>    | Ca_Kabuli_Scaffold2827       | 172                            | (G/A)       |
| 15187       | CakSNP15187    | <i>Kabuli</i>    | Ca_Kabuli_Scaffold2827       | 179                            | (T/G)       |
| 15188       | CakSNP15188    | <i>Kabuli</i>    | Ca_Kabuli_Scaffold2827       | 210                            | (A/G)       |
| 15189       | CakSNP15189    | <i>Kabuli</i>    | Ca_Kabuli_Scaffold2827       | 285                            | (T/G)       |
| 15190       | CakSNP15190    | <i>Kabuli</i>    | Ca_Kabuli_Scaffold2827       | 258                            | (T/C)       |
| 15191       | CakSNP15191    | <i>Kabuli</i>    | Ca_Kabuli_Scaffold2827       | 240                            | (T/G)       |
| 15192       | CakSNP15192    | <i>Kabuli</i>    | Ca_Kabuli_Scaffold2827       | 222                            | (C/T)       |
| 15193       | CakSNP15193    | <i>Kabuli</i>    | Ca_Kabuli_Scaffold284        | 242841                         | (A/T)       |
| 15194       | CakSNP15194    | <i>Kabuli</i>    | Ca_Kabuli_Scaffold284        | 242778                         | (T/C)       |
| 15195       | CakSNP15195    | <i>Kabuli</i>    | Ca_Kabuli_Scaffold284        | 522764                         | (T/G)       |
| 15196       | CakSNP15196    | <i>Kabuli</i>    | Ca_Kabuli_Scaffold284        | 613764                         | (G/A)       |
| 15197       | CakSNP15197    | <i>Kabuli</i>    | Ca_Kabuli_Scaffold284        | 613861                         | (C/T)       |
| 15198       | CakSNP15198    | <i>Kabuli</i>    | Ca_Kabuli_Scaffold284        | 613850                         | (C/T)       |
| 15199       | CakSNP15199    | <i>Kabuli</i>    | Ca_Kabuli_Scaffold284        | 613811                         | (G/A)       |

| <b>S.N.</b> | <b>SNP IDs</b> | <b>Cultivars</b> | <b>Chromosomes/scaffolds</b> | <b>Physical positions (bp)</b> | <b>SNPs</b> |
|-------------|----------------|------------------|------------------------------|--------------------------------|-------------|
| 15200       | CakSNP15200    | <i>Kabuli</i>    | Ca_Kabuli_Scaffold284        | 826690                         | (T/C)       |
| 15201       | CakSNP15201    | <i>Kabuli</i>    | Ca_Kabuli_Scaffold284        | 826644                         | (G/A)       |
| 15202       | CakSNP15202    | <i>Kabuli</i>    | Ca_Kabuli_Scaffold2845       | 7107                           | (G/A)       |
| 15203       | CakSNP15203    | <i>Kabuli</i>    | Ca_Kabuli_Scaffold2848       | 2403                           | (C/A)       |
| 15204       | CakSNP15204    | <i>Kabuli</i>    | Ca_Kabuli_Scaffold2848       | 2444                           | (C/A)       |
| 15205       | CakSNP15205    | <i>Kabuli</i>    | Ca_Kabuli_Scaffold2848       | 2517                           | (G/A)       |
| 15206       | CakSNP15206    | <i>Kabuli</i>    | Ca_Kabuli_Scaffold2848       | 2464                           | (A/G)       |
| 15207       | CakSNP15207    | <i>Kabuli</i>    | Ca_Kabuli_Scaffold2853       | 14852                          | (C/G)       |
| 15208       | CakSNP15208    | <i>Kabuli</i>    | Ca_Kabuli_Scaffold2853       | 14916                          | (A/G)       |
| 15209       | CakSNP15209    | <i>Kabuli</i>    | Ca_Kabuli_Scaffold2853       | 14917                          | (G/A)       |
| 15210       | CakSNP15210    | <i>Kabuli</i>    | Ca_Kabuli_Scaffold2853       | 15100                          | (T/C)       |
| 15211       | CakSNP15211    | <i>Kabuli</i>    | Ca_Kabuli_Scaffold2853       | 15086                          | (G/A)       |
| 15212       | CakSNP15212    | <i>Kabuli</i>    | Ca_Kabuli_Scaffold287        | 3224                           | (G/A)       |
| 15213       | CakSNP15213    | <i>Kabuli</i>    | Ca_Kabuli_Scaffold287        | 163600                         | (G/C)       |
| 15214       | CakSNP15214    | <i>Kabuli</i>    | Ca_Kabuli_Scaffold287        | 163591                         | (C/A)       |
| 15215       | CakSNP15215    | <i>Kabuli</i>    | Ca_Kabuli_Scaffold287        | 163576                         | (G/A)       |
| 15216       | CakSNP15216    | <i>Kabuli</i>    | Ca_Kabuli_Scaffold290        | 179998                         | (T/C)       |
| 15217       | CakSNP15217    | <i>Kabuli</i>    | Ca_Kabuli_Scaffold290        | 179993                         | (C/T)       |
| 15218       | CakSNP15218    | <i>Kabuli</i>    | Ca_Kabuli_Scaffold290        | 179984                         | (G/T)       |
| 15219       | CakSNP15219    | <i>Kabuli</i>    | Ca_Kabuli_Scaffold290        | 179940                         | (G/A)       |
| 15220       | CakSNP15220    | <i>Kabuli</i>    | Ca_Kabuli_Scaffold290        | 179937                         | (C/G)       |
| 15221       | CakSNP15221    | <i>Kabuli</i>    | Ca_Kabuli_Scaffold290        | 179969                         | (A/T)       |
| 15222       | CakSNP15222    | <i>Kabuli</i>    | Ca_Kabuli_Scaffold290        | 211634                         | (A/C)       |
| 15223       | CakSNP15223    | <i>Kabuli</i>    | Ca_Kabuli_Scaffold290        | 212536                         | (A/C)       |
| 15224       | CakSNP15224    | <i>Kabuli</i>    | Ca_Kabuli_Scaffold290        | 212514                         | (C/T)       |
| 15225       | CakSNP15225    | <i>Kabuli</i>    | Ca_Kabuli_Scaffold290        | 255161                         | (G/A)       |
| 15226       | CakSNP15226    | <i>Kabuli</i>    | Ca_Kabuli_Scaffold290        | 728010                         | (T/A)       |
| 15227       | CakSNP15227    | <i>Kabuli</i>    | Ca_Kabuli_Scaffold290        | 824906                         | (C/T)       |
| 15228       | CakSNP15228    | <i>Kabuli</i>    | Ca_Kabuli_Scaffold2907       | 31202                          | (G/A)       |
| 15229       | CakSNP15229    | <i>Kabuli</i>    | Ca_Kabuli_Scaffold2950       | 32650                          | (C/T)       |
| 15230       | CakSNP15230    | <i>Kabuli</i>    | Ca_Kabuli_Scaffold2950       | 32703                          | (A/C)       |
| 15231       | CakSNP15231    | <i>Kabuli</i>    | Ca_Kabuli_Scaffold2950       | 32739                          | (C/A)       |
| 15232       | CakSNP15232    | <i>Kabuli</i>    | Ca_Kabuli_Scaffold2950       | 32776                          | (T/A)       |
| 15233       | CakSNP15233    | <i>Kabuli</i>    | Ca_Kabuli_Scaffold2950       | 33081                          | (A/G)       |
| 15234       | CakSNP15234    | <i>Kabuli</i>    | Ca_Kabuli_Scaffold2950       | 33207                          | (C/T)       |
| 15235       | CakSNP15235    | <i>Kabuli</i>    | Ca_Kabuli_Scaffold296        | 41422                          | (T/G)       |
| 15236       | CakSNP15236    | <i>Kabuli</i>    | Ca_Kabuli_Scaffold296        | 59691                          | (G/A)       |
| 15237       | CakSNP15237    | <i>Kabuli</i>    | Ca_Kabuli_Scaffold296        | 59758                          | (A/G)       |

| <b>S.N.</b> | <b>SNP IDs</b> | <b>Cultivars</b> | <b>Chromosomes/scaffolds</b> | <b>Physical positions (bp)</b> | <b>SNPs</b> |
|-------------|----------------|------------------|------------------------------|--------------------------------|-------------|
| 15238       | CakSNP15238    | <i>Kabuli</i>    | Ca_Kabuli_Scaffold296        | 59883                          | (A/C)       |
| 15239       | CakSNP15239    | <i>Kabuli</i>    | Ca_Kabuli_Scaffold296        | 361664                         | (T/C)       |
| 15240       | CakSNP15240    | <i>Kabuli</i>    | Ca_Kabuli_Scaffold299        | 199050                         | (A/T)       |
| 15241       | CakSNP15241    | <i>Kabuli</i>    | Ca_Kabuli_Scaffold299        | 199067                         | (A/T)       |
| 15242       | CakSNP15242    | <i>Kabuli</i>    | Ca_Kabuli_Scaffold299        | 199068                         | (G/T)       |
| 15243       | CakSNP15243    | <i>Kabuli</i>    | Ca_Kabuli_Scaffold299        | 199087                         | (G/A)       |
| 15244       | CakSNP15244    | <i>Kabuli</i>    | Ca_Kabuli_Scaffold299        | 199073                         | (G/A)       |
| 15245       | CakSNP15245    | <i>Kabuli</i>    | Ca_Kabuli_Scaffold299        | 204540                         | (G/A)       |
| 15246       | CakSNP15246    | <i>Kabuli</i>    | Ca_Kabuli_Scaffold300        | 111914                         | (C/T)       |
| 15247       | CakSNP15247    | <i>Kabuli</i>    | Ca_Kabuli_Scaffold300        | 111924                         | (C/T)       |
| 15248       | CakSNP15248    | <i>Kabuli</i>    | Ca_Kabuli_Scaffold300        | 111926                         | (G/A)       |
| 15249       | CakSNP15249    | <i>Kabuli</i>    | Ca_Kabuli_Scaffold300        | 111933                         | (C/T)       |
| 15250       | CakSNP15250    | <i>Kabuli</i>    | Ca_Kabuli_Scaffold300        | 111936                         | (C/A)       |
| 15251       | CakSNP15251    | <i>Kabuli</i>    | Ca_Kabuli_Scaffold300        | 111972                         | (A/T)       |
| 15252       | CakSNP15252    | <i>Kabuli</i>    | Ca_Kabuli_Scaffold300        | 111973                         | (A/T)       |
| 15253       | CakSNP15253    | <i>Kabuli</i>    | Ca_Kabuli_Scaffold300        | 111976                         | (C/T)       |
| 15254       | CakSNP15254    | <i>Kabuli</i>    | Ca_Kabuli_Scaffold300        | 112011                         | (T/C)       |
| 15255       | CakSNP15255    | <i>Kabuli</i>    | Ca_Kabuli_Scaffold300        | 112006                         | (G/A)       |
| 15256       | CakSNP15256    | <i>Kabuli</i>    | Ca_Kabuli_Scaffold300        | 112005                         | (G/A)       |
| 15257       | CakSNP15257    | <i>Kabuli</i>    | Ca_Kabuli_Scaffold300        | 111959                         | (C/T)       |
| 15258       | CakSNP15258    | <i>Kabuli</i>    | Ca_Kabuli_Scaffold300        | 111964                         | (C/T)       |
| 15259       | CakSNP15259    | <i>Kabuli</i>    | Ca_Kabuli_Scaffold3016       | 32790                          | (C/T)       |
| 15260       | CakSNP15260    | <i>Kabuli</i>    | Ca_Kabuli_Scaffold303        | 18213                          | (G/A)       |
| 15261       | CakSNP15261    | <i>Kabuli</i>    | Ca_Kabuli_Scaffold305        | 49263                          | (G/A)       |
| 15262       | CakSNP15262    | <i>Kabuli</i>    | Ca_Kabuli_Scaffold305        | 49266                          | (T/G)       |
| 15263       | CakSNP15263    | <i>Kabuli</i>    | Ca_Kabuli_Scaffold305        | 49278                          | (C/A)       |
| 15264       | CakSNP15264    | <i>Kabuli</i>    | Ca_Kabuli_Scaffold305        | 138929                         | (G/A)       |
| 15265       | CakSNP15265    | <i>Kabuli</i>    | Ca_Kabuli_Scaffold306        | 15514                          | (C/T)       |
| 15266       | CakSNP15266    | <i>Kabuli</i>    | Ca_Kabuli_Scaffold306        | 19215                          | (C/A)       |
| 15267       | CakSNP15267    | <i>Kabuli</i>    | Ca_Kabuli_Scaffold306        | 85993                          | (T/A)       |
| 15268       | CakSNP15268    | <i>Kabuli</i>    | Ca_Kabuli_Scaffold306        | 88389                          | (T/A)       |
| 15269       | CakSNP15269    | <i>Kabuli</i>    | Ca_Kabuli_Scaffold3084       | 4409                           | (G/A)       |
| 15270       | CakSNP15270    | <i>Kabuli</i>    | Ca_Kabuli_Scaffold308_2      | 9421                           | (G/A)       |
| 15271       | CakSNP15271    | <i>Kabuli</i>    | Ca_Kabuli_Scaffold308_2      | 143696                         | (C/G)       |
| 15272       | CakSNP15272    | <i>Kabuli</i>    | Ca_Kabuli_Scaffold308_2      | 143813                         | (C/G)       |
| 15273       | CakSNP15273    | <i>Kabuli</i>    | Ca_Kabuli_Scaffold308_2      | 144354                         | (C/T)       |
| 15274       | CakSNP15274    | <i>Kabuli</i>    | Ca_Kabuli_Scaffold308_2      | 144508                         | (C/T)       |
| 15275       | CakSNP15275    | <i>Kabuli</i>    | Ca_Kabuli_Scaffold308_2      | 145639                         | (G/T)       |

| <b>S.N.</b> | <b>SNP IDs</b> | <b>Cultivars</b> | <b>Chromosomes/scaffolds</b> | <b>Physical positions (bp)</b> | <b>SNPs</b> |
|-------------|----------------|------------------|------------------------------|--------------------------------|-------------|
| 15276       | CakSNP15276    | <i>Kabuli</i>    | Ca_Kabuli_Scaffold308_2      | 152546                         | (A/G)       |
| 15277       | CakSNP15277    | <i>Kabuli</i>    | Ca_Kabuli_Scaffold308_2      | 152576                         | (G/T)       |
| 15278       | CakSNP15278    | <i>Kabuli</i>    | Ca_Kabuli_Scaffold311        | 86652                          | (C/A)       |
| 15279       | CakSNP15279    | <i>Kabuli</i>    | Ca_Kabuli_Scaffold311        | 86677                          | (C/T)       |
| 15280       | CakSNP15280    | <i>Kabuli</i>    | Ca_Kabuli_Scaffold311        | 86658                          | (C/T)       |
| 15281       | CakSNP15281    | <i>Kabuli</i>    | Ca_Kabuli_Scaffold311        | 86670                          | (G/A)       |
| 15282       | CakSNP15282    | <i>Kabuli</i>    | Ca_Kabuli_Scaffold3116       | 159                            | (T/G)       |
| 15283       | CakSNP15283    | <i>Kabuli</i>    | Ca_Kabuli_Scaffold314        | 432453                         | (T/C)       |
| 15284       | CakSNP15284    | <i>Kabuli</i>    | Ca_Kabuli_Scaffold314        | 432471                         | (A/G)       |
| 15285       | CakSNP15285    | <i>Kabuli</i>    | Ca_Kabuli_Scaffold314        | 535269                         | (A/C)       |
| 15286       | CakSNP15286    | <i>Kabuli</i>    | Ca_Kabuli_Scaffold314        | 535266                         | (A/C)       |
| 15287       | CakSNP15287    | <i>Kabuli</i>    | Ca_Kabuli_Scaffold314        | 535263                         | (T/C)       |
| 15288       | CakSNP15288    | <i>Kabuli</i>    | Ca_Kabuli_Scaffold314        | 610535                         | (C/G)       |
| 15289       | CakSNP15289    | <i>Kabuli</i>    | Ca_Kabuli_Scaffold314        | 624361                         | (C/T)       |
| 15290       | CakSNP15290    | <i>Kabuli</i>    | Ca_Kabuli_Scaffold3155       | 7438                           | (A/C)       |
| 15291       | CakSNP15291    | <i>Kabuli</i>    | Ca_Kabuli_Scaffold3155       | 7442                           | (T/C)       |
| 15292       | CakSNP15292    | <i>Kabuli</i>    | Ca_Kabuli_Scaffold3155       | 7443                           | (A/G)       |
| 15293       | CakSNP15293    | <i>Kabuli</i>    | Ca_Kabuli_Scaffold3155       | 7444                           | (A/G)       |
| 15294       | CakSNP15294    | <i>Kabuli</i>    | Ca_Kabuli_Scaffold3155       | 7455                           | (T/G)       |
| 15295       | CakSNP15295    | <i>Kabuli</i>    | Ca_Kabuli_Scaffold3155       | 7462                           | (A/G)       |
| 15296       | CakSNP15296    | <i>Kabuli</i>    | Ca_Kabuli_Scaffold3155       | 7464                           | (T/A)       |
| 15297       | CakSNP15297    | <i>Kabuli</i>    | Ca_Kabuli_Scaffold3155       | 7472                           | (A/G)       |
| 15298       | CakSNP15298    | <i>Kabuli</i>    | Ca_Kabuli_Scaffold3155       | 7477                           | (C/G)       |
| 15299       | CakSNP15299    | <i>Kabuli</i>    | Ca_Kabuli_Scaffold3155       | 7480                           | (G/A)       |
| 15300       | CakSNP15300    | <i>Kabuli</i>    | Ca_Kabuli_Scaffold3155       | 9404                           | (C/T)       |
| 15301       | CakSNP15301    | <i>Kabuli</i>    | Ca_Kabuli_Scaffold3155       | 9746                           | (A/T)       |
| 15302       | CakSNP15302    | <i>Kabuli</i>    | Ca_Kabuli_Scaffold3170       | 56261                          | (A/G)       |
| 15303       | CakSNP15303    | <i>Kabuli</i>    | Ca_Kabuli_Scaffold322        | 55475                          | (G/A)       |
| 15304       | CakSNP15304    | <i>Kabuli</i>    | Ca_Kabuli_Scaffold322        | 55479                          | (G/T)       |
| 15305       | CakSNP15305    | <i>Kabuli</i>    | Ca_Kabuli_Scaffold322        | 55589                          | (A/T)       |
| 15306       | CakSNP15306    | <i>Kabuli</i>    | Ca_Kabuli_Scaffold3228       | 2926                           | (C/T)       |
| 15307       | CakSNP15307    | <i>Kabuli</i>    | Ca_Kabuli_Scaffold3228       | 23138                          | (A/G)       |
| 15308       | CakSNP15308    | <i>Kabuli</i>    | Ca_Kabuli_Scaffold3228       | 23190                          | (G/C)       |
| 15309       | CakSNP15309    | <i>Kabuli</i>    | Ca_Kabuli_Scaffold3228       | 23315                          | (C/A)       |
| 15310       | CakSNP15310    | <i>Kabuli</i>    | Ca_Kabuli_Scaffold3228       | 23270                          | (A/C)       |
| 15311       | CakSNP15311    | <i>Kabuli</i>    | Ca_Kabuli_Scaffold324        | 15569                          | (A/C)       |
| 15312       | CakSNP15312    | <i>Kabuli</i>    | Ca_Kabuli_Scaffold324        | 15574                          | (G/A)       |
| 15313       | CakSNP15313    | <i>Kabuli</i>    | Ca_Kabuli_Scaffold324        | 15575                          | (G/C)       |

| <b>S.N.</b> | <b>SNP IDs</b> | <b>Cultivars</b> | <b>Chromosomes/scaffolds</b> | <b>Physical positions (bp)</b> | <b>SNPs</b> |
|-------------|----------------|------------------|------------------------------|--------------------------------|-------------|
| 15314       | CakSNP15314    | <i>Kabuli</i>    | Ca_Kabuli_Scaffold324        | 15581                          | (G/C)       |
| 15315       | CakSNP15315    | <i>Kabuli</i>    | Ca_Kabuli_Scaffold324        | 15590                          | (G/T)       |
| 15316       | CakSNP15316    | <i>Kabuli</i>    | Ca_Kabuli_Scaffold324        | 15593                          | (G/A)       |
| 15317       | CakSNP15317    | <i>Kabuli</i>    | Ca_Kabuli_Scaffold324        | 15594                          | (C/A)       |
| 15318       | CakSNP15318    | <i>Kabuli</i>    | Ca_Kabuli_Scaffold324        | 15614                          | (C/T)       |
| 15319       | CakSNP15319    | <i>Kabuli</i>    | Ca_Kabuli_Scaffold324        | 15619                          | (A/G)       |
| 15320       | CakSNP15320    | <i>Kabuli</i>    | Ca_Kabuli_Scaffold324        | 15636                          | (G/A)       |
| 15321       | CakSNP15321    | <i>Kabuli</i>    | Ca_Kabuli_Scaffold3254_2     | 15616                          | (A/G)       |
| 15322       | CakSNP15322    | <i>Kabuli</i>    | Ca_Kabuli_Scaffold3254_2     | 28089                          | (T/C)       |
| 15323       | CakSNP15323    | <i>Kabuli</i>    | Ca_Kabuli_Scaffold3254_2     | 31210                          | (T/A)       |
| 15324       | CakSNP15324    | <i>Kabuli</i>    | Ca_Kabuli_Scaffold3254_2     | 31217                          | (C/T)       |
| 15325       | CakSNP15325    | <i>Kabuli</i>    | Ca_Kabuli_Scaffold3254_2     | 31219                          | (A/C)       |
| 15326       | CakSNP15326    | <i>Kabuli</i>    | Ca_Kabuli_Scaffold3254_2     | 31224                          | (T/G)       |
| 15327       | CakSNP15327    | <i>Kabuli</i>    | Ca_Kabuli_Scaffold3254_2     | 31229                          | (G/T)       |
| 15328       | CakSNP15328    | <i>Kabuli</i>    | Ca_Kabuli_Scaffold3254_2     | 31242                          | (C/A)       |
| 15329       | CakSNP15329    | <i>Kabuli</i>    | Ca_Kabuli_Scaffold3254_2     | 31344                          | (A/G)       |
| 15330       | CakSNP15330    | <i>Kabuli</i>    | Ca_Kabuli_Scaffold3254_2     | 31325                          | (T/A)       |
| 15331       | CakSNP15331    | <i>Kabuli</i>    | Ca_Kabuli_Scaffold3254_2     | 31322                          | (G/A)       |
| 15332       | CakSNP15332    | <i>Kabuli</i>    | Ca_Kabuli_Scaffold3254_2     | 31311                          | (G/A)       |
| 15333       | CakSNP15333    | <i>Kabuli</i>    | Ca_Kabuli_Scaffold3254_2     | 31303                          | (T/C)       |
| 15334       | CakSNP15334    | <i>Kabuli</i>    | Ca_Kabuli_Scaffold3254_2     | 39157                          | (T/A)       |
| 15335       | CakSNP15335    | <i>Kabuli</i>    | Ca_Kabuli_Scaffold3254_2     | 46644                          | (G/A)       |
| 15336       | CakSNP15336    | <i>Kabuli</i>    | Ca_Kabuli_Scaffold3254_2     | 186218                         | (G/A)       |
| 15337       | CakSNP15337    | <i>Kabuli</i>    | Ca_Kabuli_Scaffold3254_2     | 186203                         | (C/G)       |
| 15338       | CakSNP15338    | <i>Kabuli</i>    | Ca_Kabuli_Scaffold3254_2     | 186243                         | (A/C)       |
| 15339       | CakSNP15339    | <i>Kabuli</i>    | Ca_Kabuli_Scaffold3284       | 2735                           | (T/C)       |
| 15340       | CakSNP15340    | <i>Kabuli</i>    | Ca_Kabuli_Scaffold332        | 203691                         | (T/A)       |
| 15341       | CakSNP15341    | <i>Kabuli</i>    | Ca_Kabuli_Scaffold332        | 204783                         | (A/G)       |
| 15342       | CakSNP15342    | <i>Kabuli</i>    | Ca_Kabuli_Scaffold332        | 204785                         | (G/A)       |
| 15343       | CakSNP15343    | <i>Kabuli</i>    | Ca_Kabuli_Scaffold332        | 204952                         | (G/A)       |
| 15344       | CakSNP15344    | <i>Kabuli</i>    | Ca_Kabuli_Scaffold3321       | 17935                          | (C/A)       |
| 15345       | CakSNP15345    | <i>Kabuli</i>    | Ca_Kabuli_Scaffold3337       | 17963                          | (C/T)       |
| 15346       | CakSNP15346    | <i>Kabuli</i>    | Ca_Kabuli_Scaffold3337       | 17999                          | (T/G)       |
| 15347       | CakSNP15347    | <i>Kabuli</i>    | Ca_Kabuli_Scaffold3337       | 18022                          | (C/T)       |
| 15348       | CakSNP15348    | <i>Kabuli</i>    | Ca_Kabuli_Scaffold3337       | 18026                          | (T/A)       |
| 15349       | CakSNP15349    | <i>Kabuli</i>    | Ca_Kabuli_Scaffold3337       | 17959                          | (A/G)       |
| 15350       | CakSNP15350    | <i>Kabuli</i>    | Ca_Kabuli_Scaffold3337       | 17956                          | (G/A)       |
| 15351       | CakSNP15351    | <i>Kabuli</i>    | Ca_Kabuli_Scaffold334        | 43160                          | (G/A)       |

| <b>S.N.</b> | <b>SNP IDs</b> | <b>Cultivars</b> | <b>Chromosomes/scaffolds</b> | <b>Physical positions (bp)</b> | <b>SNPs</b> |
|-------------|----------------|------------------|------------------------------|--------------------------------|-------------|
| 15352       | CakSNP15352    | <i>Kabuli</i>    | Ca_Kabuli_Scaffold335        | 60951                          | (T/C)       |
| 15353       | CakSNP15353    | <i>Kabuli</i>    | Ca_Kabuli_Scaffold335        | 60952                          | (T/C)       |
| 15354       | CakSNP15354    | <i>Kabuli</i>    | Ca_Kabuli_Scaffold335        | 60956                          | (T/C)       |
| 15355       | CakSNP15355    | <i>Kabuli</i>    | Ca_Kabuli_Scaffold335        | 60957                          | (T/C)       |
| 15356       | CakSNP15356    | <i>Kabuli</i>    | Ca_Kabuli_Scaffold335        | 60960                          | (T/C)       |
| 15357       | CakSNP15357    | <i>Kabuli</i>    | Ca_Kabuli_Scaffold335        | 60961                          | (C/T)       |
| 15358       | CakSNP15358    | <i>Kabuli</i>    | Ca_Kabuli_Scaffold335        | 60962                          | (T/G)       |
| 15359       | CakSNP15359    | <i>Kabuli</i>    | Ca_Kabuli_Scaffold335        | 60906                          | (T/G)       |
| 15360       | CakSNP15360    | <i>Kabuli</i>    | Ca_Kabuli_Scaffold335        | 135942                         | (T/A)       |
| 15361       | CakSNP15361    | <i>Kabuli</i>    | Ca_Kabuli_Scaffold335        | 136017                         | (C/G)       |
| 15362       | CakSNP15362    | <i>Kabuli</i>    | Ca_Kabuli_Scaffold335        | 135969                         | (C/T)       |
| 15363       | CakSNP15363    | <i>Kabuli</i>    | Ca_Kabuli_Scaffold335        | 135976                         | (C/T)       |
| 15364       | CakSNP15364    | <i>Kabuli</i>    | Ca_Kabuli_Scaffold335        | 136077                         | (G/C)       |
| 15365       | CakSNP15365    | <i>Kabuli</i>    | Ca_Kabuli_Scaffold335        | 136076                         | (G/C)       |
| 15366       | CakSNP15366    | <i>Kabuli</i>    | Ca_Kabuli_Scaffold335        | 136073                         | (G/A)       |
| 15367       | CakSNP15367    | <i>Kabuli</i>    | Ca_Kabuli_Scaffold335        | 136051                         | (T/A)       |
| 15368       | CakSNP15368    | <i>Kabuli</i>    | Ca_Kabuli_Scaffold335        | 136030                         | (G/A)       |
| 15369       | CakSNP15369    | <i>Kabuli</i>    | Ca_Kabuli_Scaffold335        | 136129                         | (T/C)       |
| 15370       | CakSNP15370    | <i>Kabuli</i>    | Ca_Kabuli_Scaffold335        | 136109                         | (G/T)       |
| 15371       | CakSNP15371    | <i>Kabuli</i>    | Ca_Kabuli_Scaffold335        | 136106                         | (G/A)       |
| 15372       | CakSNP15372    | <i>Kabuli</i>    | Ca_Kabuli_Scaffold335        | 136096                         | (T/C)       |
| 15373       | CakSNP15373    | <i>Kabuli</i>    | Ca_Kabuli_Scaffold335        | 136091                         | (G/A)       |
| 15374       | CakSNP15374    | <i>Kabuli</i>    | Ca_Kabuli_Scaffold336        | 468863                         | (T/A)       |
| 15375       | CakSNP15375    | <i>Kabuli</i>    | Ca_Kabuli_Scaffold336        | 563363                         | (C/T)       |
| 15376       | CakSNP15376    | <i>Kabuli</i>    | Ca_Kabuli_Scaffold336        | 618427                         | (C/T)       |
| 15377       | CakSNP15377    | <i>Kabuli</i>    | Ca_Kabuli_Scaffold336        | 771169                         | (C/T)       |
| 15378       | CakSNP15378    | <i>Kabuli</i>    | Ca_Kabuli_Scaffold336        | 771175                         | (C/T)       |
| 15379       | CakSNP15379    | <i>Kabuli</i>    | Ca_Kabuli_Scaffold3362       | 69878                          | (C/A)       |
| 15380       | CakSNP15380    | <i>Kabuli</i>    | Ca_Kabuli_Scaffold338        | 14666                          | (T/G)       |
| 15381       | CakSNP15381    | <i>Kabuli</i>    | Ca_Kabuli_Scaffold3397       | 45363                          | (T/C)       |
| 15382       | CakSNP15382    | <i>Kabuli</i>    | Ca_Kabuli_Scaffold342        | 311411                         | (G/A)       |
| 15383       | CakSNP15383    | <i>Kabuli</i>    | Ca_Kabuli_Scaffold342        | 311394                         | (A/C)       |
| 15384       | CakSNP15384    | <i>Kabuli</i>    | Ca_Kabuli_Scaffold342        | 359376                         | (A/C)       |
| 15385       | CakSNP15385    | <i>Kabuli</i>    | Ca_Kabuli_Scaffold3422       | 13376                          | (T/A)       |
| 15386       | CakSNP15386    | <i>Kabuli</i>    | Ca_Kabuli_Scaffold346_1      | 67110                          | (G/T)       |
| 15387       | CakSNP15387    | <i>Kabuli</i>    | Ca_Kabuli_Scaffold346_1      | 105461                         | (A/G)       |
| 15388       | CakSNP15388    | <i>Kabuli</i>    | Ca_Kabuli_Scaffold346_1      | 105521                         | (A/C)       |
| 15389       | CakSNP15389    | <i>Kabuli</i>    | Ca_Kabuli_Scaffold346_1      | 105523                         | (G/A)       |

| <b>S.N.</b> | <b>SNP IDs</b> | <b>Cultivars</b> | <b>Chromosomes/scaffolds</b> | <b>Physical positions (bp)</b> | <b>SNPs</b> |
|-------------|----------------|------------------|------------------------------|--------------------------------|-------------|
| 15390       | CakSNP15390    | <i>Kabuli</i>    | Ca_Kabuli_Scaffold346_1      | 105546                         | (C/T)       |
| 15391       | CakSNP15391    | <i>Kabuli</i>    | Ca_Kabuli_Scaffold349        | 51381                          | (A/T)       |
| 15392       | CakSNP15392    | <i>Kabuli</i>    | Ca_Kabuli_Scaffold349        | 51396                          | (G/A)       |
| 15393       | CakSNP15393    | <i>Kabuli</i>    | Ca_Kabuli_Scaffold349        | 51414                          | (C/T)       |
| 15394       | CakSNP15394    | <i>Kabuli</i>    | Ca_Kabuli_Scaffold349        | 51435                          | (C/T)       |
| 15395       | CakSNP15395    | <i>Kabuli</i>    | Ca_Kabuli_Scaffold349        | 51548                          | (T/C)       |
| 15396       | CakSNP15396    | <i>Kabuli</i>    | Ca_Kabuli_Scaffold349        | 51637                          | (T/A)       |
| 15397       | CakSNP15397    | <i>Kabuli</i>    | Ca_Kabuli_Scaffold349        | 51624                          | (G/A)       |
| 15398       | CakSNP15398    | <i>Kabuli</i>    | Ca_Kabuli_Scaffold349        | 174027                         | (G/C)       |
| 15399       | CakSNP15399    | <i>Kabuli</i>    | Ca_Kabuli_Scaffold349        | 174039                         | (A/T)       |
| 15400       | CakSNP15400    | <i>Kabuli</i>    | Ca_Kabuli_Scaffold3514       | 42134                          | (G/A)       |
| 15401       | CakSNP15401    | <i>Kabuli</i>    | Ca_Kabuli_Scaffold3514       | 42135                          | (G/T)       |
| 15402       | CakSNP15402    | <i>Kabuli</i>    | Ca_Kabuli_Scaffold3514       | 42156                          | (G/A)       |
| 15403       | CakSNP15403    | <i>Kabuli</i>    | Ca_Kabuli_Scaffold3514       | 42163                          | (T/C)       |
| 15404       | CakSNP15404    | <i>Kabuli</i>    | Ca_Kabuli_Scaffold3514       | 42164                          | (A/G)       |
| 15405       | CakSNP15405    | <i>Kabuli</i>    | Ca_Kabuli_Scaffold3514       | 42175                          | (G/A)       |
| 15406       | CakSNP15406    | <i>Kabuli</i>    | Ca_Kabuli_Scaffold352        | 22672                          | (C/T)       |
| 15407       | CakSNP15407    | <i>Kabuli</i>    | Ca_Kabuli_Scaffold352        | 22675                          | (G/A)       |
| 15408       | CakSNP15408    | <i>Kabuli</i>    | Ca_Kabuli_Scaffold352        | 22693                          | (C/T)       |
| 15409       | CakSNP15409    | <i>Kabuli</i>    | Ca_Kabuli_Scaffold352        | 22708                          | (A/G)       |
| 15410       | CakSNP15410    | <i>Kabuli</i>    | Ca_Kabuli_Scaffold352        | 22787                          | (A/G)       |
| 15411       | CakSNP15411    | <i>Kabuli</i>    | Ca_Kabuli_Scaffold352        | 22777                          | (T/G)       |
| 15412       | CakSNP15412    | <i>Kabuli</i>    | Ca_Kabuli_Scaffold352        | 22726                          | (A/C)       |
| 15413       | CakSNP15413    | <i>Kabuli</i>    | Ca_Kabuli_Scaffold36         | 167556                         | (C/T)       |
| 15414       | CakSNP15414    | <i>Kabuli</i>    | Ca_Kabuli_Scaffold36         | 226511                         | (A/G)       |
| 15415       | CakSNP15415    | <i>Kabuli</i>    | Ca_Kabuli_Scaffold362        | 84943                          | (A/G)       |
| 15416       | CakSNP15416    | <i>Kabuli</i>    | Ca_Kabuli_Scaffold362        | 84945                          | (T/C)       |
| 15417       | CakSNP15417    | <i>Kabuli</i>    | Ca_Kabuli_Scaffold362        | 84954                          | (T/C)       |
| 15418       | CakSNP15418    | <i>Kabuli</i>    | Ca_Kabuli_Scaffold362        | 84972                          | (C/A)       |
| 15419       | CakSNP15419    | <i>Kabuli</i>    | Ca_Kabuli_Scaffold362        | 84988                          | (T/G)       |
| 15420       | CakSNP15420    | <i>Kabuli</i>    | Ca_Kabuli_Scaffold362        | 84994                          | (G/A)       |
| 15421       | CakSNP15421    | <i>Kabuli</i>    | Ca_Kabuli_Scaffold362        | 164620                         | (C/T)       |
| 15422       | CakSNP15422    | <i>Kabuli</i>    | Ca_Kabuli_Scaffold362        | 164789                         | (T/C)       |
| 15423       | CakSNP15423    | <i>Kabuli</i>    | Ca_Kabuli_Scaffold362        | 164787                         | (C/T)       |
| 15424       | CakSNP15424    | <i>Kabuli</i>    | Ca_Kabuli_Scaffold362        | 196556                         | (G/A)       |
| 15425       | CakSNP15425    | <i>Kabuli</i>    | Ca_Kabuli_Scaffold362        | 219176                         | (T/C)       |
| 15426       | CakSNP15426    | <i>Kabuli</i>    | Ca_Kabuli_Scaffold366        | 61810                          | (C/T)       |
| 15427       | CakSNP15427    | <i>Kabuli</i>    | Ca_Kabuli_Scaffold369        | 162735                         | (T/G)       |



| <b>S.N.</b> | <b>SNP IDs</b> | <b>Cultivars</b> | <b>Chromosomes/scaffolds</b> | <b>Physical positions (bp)</b> | <b>SNPs</b> |
|-------------|----------------|------------------|------------------------------|--------------------------------|-------------|
| 15428       | CakSNP15428    | <i>Kabuli</i>    | Ca_Kabuli_Scaffold3693       | 81068                          | (C/T)       |
| 15429       | CakSNP15429    | <i>Kabuli</i>    | Ca_Kabuli_Scaffold3693       | 81080                          | (C/A)       |
| 15430       | CakSNP15430    | <i>Kabuli</i>    | Ca_Kabuli_Scaffold3693       | 81204                          | (C/T)       |
| 15431       | CakSNP15431    | <i>Kabuli</i>    | Ca_Kabuli_Scaffold3724       | 68378                          | (G/A)       |
| 15432       | CakSNP15432    | <i>Kabuli</i>    | Ca_Kabuli_Scaffold374        | 132907                         | (A/C)       |
| 15433       | CakSNP15433    | <i>Kabuli</i>    | Ca_Kabuli_Scaffold374        | 132896                         | (T/C)       |
| 15434       | CakSNP15434    | <i>Kabuli</i>    | Ca_Kabuli_Scaffold374        | 132873                         | (A/G)       |
| 15435       | CakSNP15435    | <i>Kabuli</i>    | Ca_Kabuli_Scaffold374        | 132859                         | (C/T)       |
| 15436       | CakSNP15436    | <i>Kabuli</i>    | Ca_Kabuli_Scaffold374        | 132858                         | (G/A)       |
| 15437       | CakSNP15437    | <i>Kabuli</i>    | Ca_Kabuli_Scaffold374        | 132849                         | (A/C)       |
| 15438       | CakSNP15438    | <i>Kabuli</i>    | Ca_Kabuli_Scaffold374        | 132843                         | (C/T)       |
| 15439       | CakSNP15439    | <i>Kabuli</i>    | Ca_Kabuli_Scaffold374        | 198368                         | (T/C)       |
| 15440       | CakSNP15440    | <i>Kabuli</i>    | Ca_Kabuli_Scaffold377        | 393535                         | (G/T)       |
| 15441       | CakSNP15441    | <i>Kabuli</i>    | Ca_Kabuli_Scaffold377        | 393538                         | (G/A)       |
| 15442       | CakSNP15442    | <i>Kabuli</i>    | Ca_Kabuli_Scaffold379        | 69075                          | (A/C)       |
| 15443       | CakSNP15443    | <i>Kabuli</i>    | Ca_Kabuli_Scaffold379        | 144442                         | (G/A)       |
| 15444       | CakSNP15444    | <i>Kabuli</i>    | Ca_Kabuli_Scaffold379        | 177306                         | (T/C)       |
| 15445       | CakSNP15445    | <i>Kabuli</i>    | Ca_Kabuli_Scaffold379        | 177354                         | (G/A)       |
| 15446       | CakSNP15446    | <i>Kabuli</i>    | Ca_Kabuli_Scaffold379        | 177340                         | (C/T)       |
| 15447       | CakSNP15447    | <i>Kabuli</i>    | Ca_Kabuli_Scaffold379        | 227608                         | (A/T)       |
| 15448       | CakSNP15448    | <i>Kabuli</i>    | Ca_Kabuli_Scaffold379        | 227604                         | (C/A)       |
| 15449       | CakSNP15449    | <i>Kabuli</i>    | Ca_Kabuli_Scaffold379        | 227597                         | (T/A)       |
| 15450       | CakSNP15450    | <i>Kabuli</i>    | Ca_Kabuli_Scaffold38         | 69499                          | (A/G)       |
| 15451       | CakSNP15451    | <i>Kabuli</i>    | Ca_Kabuli_Scaffold38         | 413691                         | (G/A)       |
| 15452       | CakSNP15452    | <i>Kabuli</i>    | Ca_Kabuli_Scaffold38         | 413713                         | (A/C)       |
| 15453       | CakSNP15453    | <i>Kabuli</i>    | Ca_Kabuli_Scaffold38         | 413719                         | (G/A)       |
| 15454       | CakSNP15454    | <i>Kabuli</i>    | Ca_Kabuli_Scaffold38         | 457392                         | (C/A)       |
| 15455       | CakSNP15455    | <i>Kabuli</i>    | Ca_Kabuli_Scaffold38         | 457596                         | (T/A)       |
| 15456       | CakSNP15456    | <i>Kabuli</i>    | Ca_Kabuli_Scaffold38         | 520372                         | (T/G)       |
| 15457       | CakSNP15457    | <i>Kabuli</i>    | Ca_Kabuli_Scaffold38         | 520311                         | (G/A)       |
| 15458       | CakSNP15458    | <i>Kabuli</i>    | Ca_Kabuli_Scaffold38         | 520377                         | (T/C)       |
| 15459       | CakSNP15459    | <i>Kabuli</i>    | Ca_Kabuli_Scaffold38         | 537059                         | (A/T)       |
| 15460       | CakSNP15460    | <i>Kabuli</i>    | Ca_Kabuli_Scaffold38         | 537063                         | (C/T)       |
| 15461       | CakSNP15461    | <i>Kabuli</i>    | Ca_Kabuli_Scaffold3819       | 450                            | (T/A)       |
| 15462       | CakSNP15462    | <i>Kabuli</i>    | Ca_Kabuli_Scaffold382        | 36686                          | (A/T)       |
| 15463       | CakSNP15463    | <i>Kabuli</i>    | Ca_Kabuli_Scaffold382        | 36703                          | (A/T)       |
| 15464       | CakSNP15464    | <i>Kabuli</i>    | Ca_Kabuli_Scaffold382        | 36704                          | (G/T)       |
| 15465       | CakSNP15465    | <i>Kabuli</i>    | Ca_Kabuli_Scaffold382        | 36709                          | (G/A)       |

| <b>S.N.</b> | <b>SNP IDs</b> | <b>Cultivars</b> | <b>Chromosomes/scaffolds</b> | <b>Physical positions (bp)</b> | <b>SNPs</b> |
|-------------|----------------|------------------|------------------------------|--------------------------------|-------------|
| 15466       | CakSNP15466    | <i>Kabuli</i>    | Ca_Kabuli_Scaffold382        | 36674                          | (G/A)       |
| 15467       | CakSNP15467    | <i>Kabuli</i>    | Ca_Kabuli_Scaffold3824       | 26207                          | (G/A)       |
| 15468       | CakSNP15468    | <i>Kabuli</i>    | Ca_Kabuli_Scaffold3824       | 26267                          | (G/A)       |
| 15469       | CakSNP15469    | <i>Kabuli</i>    | Ca_Kabuli_Scaffold3824       | 26327                          | (G/A)       |
| 15470       | CakSNP15470    | <i>Kabuli</i>    | Ca_Kabuli_Scaffold3824       | 26387                          | (G/A)       |
| 15471       | CakSNP15471    | <i>Kabuli</i>    | Ca_Kabuli_Scaffold3865       | 12265                          | (T/A)       |
| 15472       | CakSNP15472    | <i>Kabuli</i>    | Ca_Kabuli_Scaffold3865       | 65093                          | (T/C)       |
| 15473       | CakSNP15473    | <i>Kabuli</i>    | Ca_Kabuli_Scaffold3865       | 65127                          | (C/A)       |
| 15474       | CakSNP15474    | <i>Kabuli</i>    | Ca_Kabuli_Scaffold3865       | 65129                          | (T/A)       |
| 15475       | CakSNP15475    | <i>Kabuli</i>    | Ca_Kabuli_Scaffold387        | 3263                           | (G/A)       |
| 15476       | CakSNP15476    | <i>Kabuli</i>    | Ca_Kabuli_Scaffold387        | 3219                           | (C/A)       |
| 15477       | CakSNP15477    | <i>Kabuli</i>    | Ca_Kabuli_Scaffold387        | 3309                           | (T/C)       |
| 15478       | CakSNP15478    | <i>Kabuli</i>    | Ca_Kabuli_Scaffold387        | 3316                           | (G/A)       |
| 15479       | CakSNP15479    | <i>Kabuli</i>    | Ca_Kabuli_Scaffold3945       | 3367                           | (G/A)       |
| 15480       | CakSNP15480    | <i>Kabuli</i>    | Ca_Kabuli_Scaffold3945       | 3371                           | (G/A)       |
| 15481       | CakSNP15481    | <i>Kabuli</i>    | Ca_Kabuli_Scaffold3945       | 3880                           | (G/T)       |
| 15482       | CakSNP15482    | <i>Kabuli</i>    | Ca_Kabuli_Scaffold3945       | 3879                           | (T/C)       |
| 15483       | CakSNP15483    | <i>Kabuli</i>    | Ca_Kabuli_Scaffold3945       | 7260                           | (T/A)       |
| 15484       | CakSNP15484    | <i>Kabuli</i>    | Ca_Kabuli_Scaffold3945       | 13468                          | (C/T)       |
| 15485       | CakSNP15485    | <i>Kabuli</i>    | Ca_Kabuli_Scaffold3945       | 13440                          | (C/T)       |
| 15486       | CakSNP15486    | <i>Kabuli</i>    | Ca_Kabuli_Scaffold3945       | 13892                          | (C/G)       |
| 15487       | CakSNP15487    | <i>Kabuli</i>    | Ca_Kabuli_Scaffold3945       | 18891                          | (A/T)       |
| 15488       | CakSNP15488    | <i>Kabuli</i>    | Ca_Kabuli_Scaffold3945       | 18892                          | (G/C)       |
| 15489       | CakSNP15489    | <i>Kabuli</i>    | Ca_Kabuli_Scaffold3945       | 19359                          | (G/A)       |
| 15490       | CakSNP15490    | <i>Kabuli</i>    | Ca_Kabuli_Scaffold3945       | 19366                          | (G/T)       |
| 15491       | CakSNP15491    | <i>Kabuli</i>    | Ca_Kabuli_Scaffold3945       | 19367                          | (A/T)       |
| 15492       | CakSNP15492    | <i>Kabuli</i>    | Ca_Kabuli_Scaffold3945       | 19368                          | (A/C)       |
| 15493       | CakSNP15493    | <i>Kabuli</i>    | Ca_Kabuli_Scaffold396        | 130566                         | (T/C)       |
| 15494       | CakSNP15494    | <i>Kabuli</i>    | Ca_Kabuli_Scaffold396        | 130671                         | (A/G)       |
| 15495       | CakSNP15495    | <i>Kabuli</i>    | Ca_Kabuli_Scaffold396        | 130639                         | (C/A)       |
| 15496       | CakSNP15496    | <i>Kabuli</i>    | Ca_Kabuli_Scaffold396        | 130636                         | (G/A)       |
| 15497       | CakSNP15497    | <i>Kabuli</i>    | Ca_Kabuli_Scaffold396        | 130635                         | (G/T)       |
| 15498       | CakSNP15498    | <i>Kabuli</i>    | Ca_Kabuli_Scaffold396        | 130624                         | (A/G)       |
| 15499       | CakSNP15499    | <i>Kabuli</i>    | Ca_Kabuli_Scaffold396        | 130621                         | (C/A)       |
| 15500       | CakSNP15500    | <i>Kabuli</i>    | Ca_Kabuli_Scaffold396        | 195890                         | (A/G)       |
| 15501       | CakSNP15501    | <i>Kabuli</i>    | Ca_Kabuli_Scaffold396        | 297325                         | (G/C)       |
| 15502       | CakSNP15502    | <i>Kabuli</i>    | Ca_Kabuli_Scaffold398        | 246956                         | (C/T)       |
| 15503       | CakSNP15503    | <i>Kabuli</i>    | Ca_Kabuli_Scaffold398        | 247004                         | (C/T)       |

| <b>S.N.</b> | <b>SNP IDs</b> | <b>Cultivars</b> | <b>Chromosomes/scaffolds</b> | <b>Physical positions (bp)</b> | <b>SNPs</b> |
|-------------|----------------|------------------|------------------------------|--------------------------------|-------------|
| 15504       | CakSNP15504    | <i>Kabuli</i>    | Ca_Kabuli_Scaffold398        | 441570                         | (C/T)       |
| 15505       | CakSNP15505    | <i>Kabuli</i>    | Ca_Kabuli_Scaffold398        | 441605                         | (C/A)       |
| 15506       | CakSNP15506    | <i>Kabuli</i>    | Ca_Kabuli_Scaffold40         | 386189                         | (A/C)       |
| 15507       | CakSNP15507    | <i>Kabuli</i>    | Ca_Kabuli_Scaffold40         | 497729                         | (T/C)       |
| 15508       | CakSNP15508    | <i>Kabuli</i>    | Ca_Kabuli_Scaffold40         | 542951                         | (C/G)       |
| 15509       | CakSNP15509    | <i>Kabuli</i>    | Ca_Kabuli_Scaffold40         | 548453                         | (A/G)       |
| 15510       | CakSNP15510    | <i>Kabuli</i>    | Ca_Kabuli_Scaffold40         | 636910                         | (C/T)       |
| 15511       | CakSNP15511    | <i>Kabuli</i>    | Ca_Kabuli_Scaffold40         | 691226                         | (C/G)       |
| 15512       | CakSNP15512    | <i>Kabuli</i>    | Ca_Kabuli_Scaffold40         | 871303                         | (A/C)       |
| 15513       | CakSNP15513    | <i>Kabuli</i>    | Ca_Kabuli_Scaffold40         | 911602                         | (T/G)       |
| 15514       | CakSNP15514    | <i>Kabuli</i>    | Ca_Kabuli_Scaffold40         | 968798                         | (G/A)       |
| 15515       | CakSNP15515    | <i>Kabuli</i>    | Ca_Kabuli_Scaffold40         | 996604                         | (T/C)       |
| 15516       | CakSNP15516    | <i>Kabuli</i>    | Ca_Kabuli_Scaffold40         | 1014875                        | (G/A)       |
| 15517       | CakSNP15517    | <i>Kabuli</i>    | Ca_Kabuli_Scaffold40         | 1014834                        | (T/A)       |
| 15518       | CakSNP15518    | <i>Kabuli</i>    | Ca_Kabuli_Scaffold40         | 1014826                        | (C/T)       |
| 15519       | CakSNP15519    | <i>Kabuli</i>    | Ca_Kabuli_Scaffold40         | 1014805                        | (C/T)       |
| 15520       | CakSNP15520    | <i>Kabuli</i>    | Ca_Kabuli_Scaffold40         | 1039218                        | (T/C)       |
| 15521       | CakSNP15521    | <i>Kabuli</i>    | Ca_Kabuli_Scaffold40         | 1039233                        | (A/T)       |
| 15522       | CakSNP15522    | <i>Kabuli</i>    | Ca_Kabuli_Scaffold40         | 1049594                        | (G/A)       |
| 15523       | CakSNP15523    | <i>Kabuli</i>    | Ca_Kabuli_Scaffold40         | 1050111                        | (C/T)       |
| 15524       | CakSNP15524    | <i>Kabuli</i>    | Ca_Kabuli_Scaffold40         | 1050164                        | (C/T)       |
| 15525       | CakSNP15525    | <i>Kabuli</i>    | Ca_Kabuli_Scaffold40         | 1050255                        | (T/C)       |
| 15526       | CakSNP15526    | <i>Kabuli</i>    | Ca_Kabuli_Scaffold40         | 1050175                        | (G/C)       |
| 15527       | CakSNP15527    | <i>Kabuli</i>    | Ca_Kabuli_Scaffold40         | 1052597                        | (T/C)       |
| 15528       | CakSNP15528    | <i>Kabuli</i>    | Ca_Kabuli_Scaffold40         | 1052983                        | (G/A)       |
| 15529       | CakSNP15529    | <i>Kabuli</i>    | Ca_Kabuli_Scaffold40         | 1053215                        | (G/A)       |
| 15530       | CakSNP15530    | <i>Kabuli</i>    | Ca_Kabuli_Scaffold401        | 49065                          | (G/A)       |
| 15531       | CakSNP15531    | <i>Kabuli</i>    | Ca_Kabuli_Scaffold4011       | 93334                          | (T/C)       |
| 15532       | CakSNP15532    | <i>Kabuli</i>    | Ca_Kabuli_Scaffold4011       | 93347                          | (C/T)       |
| 15533       | CakSNP15533    | <i>Kabuli</i>    | Ca_Kabuli_Scaffold4011       | 96223                          | (G/C)       |
| 15534       | CakSNP15534    | <i>Kabuli</i>    | Ca_Kabuli_Scaffold4011       | 97602                          | (T/C)       |
| 15535       | CakSNP15535    | <i>Kabuli</i>    | Ca_Kabuli_Scaffold4011       | 130271                         | (G/A)       |
| 15536       | CakSNP15536    | <i>Kabuli</i>    | Ca_Kabuli_Scaffold4011       | 130213                         | (G/A)       |
| 15537       | CakSNP15537    | <i>Kabuli</i>    | Ca_Kabuli_Scaffold404        | 273203                         | (C/A)       |
| 15538       | CakSNP15538    | <i>Kabuli</i>    | Ca_Kabuli_Scaffold404        | 273209                         | (C/A)       |
| 15539       | CakSNP15539    | <i>Kabuli</i>    | Ca_Kabuli_Scaffold404        | 273220                         | (G/A)       |
| 15540       | CakSNP15540    | <i>Kabuli</i>    | Ca_Kabuli_Scaffold404        | 273245                         | (C/T)       |
| 15541       | CakSNP15541    | <i>Kabuli</i>    | Ca_Kabuli_Scaffold404        | 285941                         | (G/A)       |

| <b>S.N.</b> | <b>SNP IDs</b> | <b>Cultivars</b> | <b>Chromosomes/scaffolds</b> | <b>Physical positions (bp)</b> | <b>SNPs</b> |
|-------------|----------------|------------------|------------------------------|--------------------------------|-------------|
| 15542       | CakSNP15542    | <i>Kabuli</i>    | Ca_Kabuli_Scaffold404        | 285952                         | (T/C)       |
| 15543       | CakSNP15543    | <i>Kabuli</i>    | Ca_Kabuli_Scaffold404        | 285958                         | (C/G)       |
| 15544       | CakSNP15544    | <i>Kabuli</i>    | Ca_Kabuli_Scaffold404        | 285987                         | (G/A)       |
| 15545       | CakSNP15545    | <i>Kabuli</i>    | Ca_Kabuli_Scaffold404        | 285999                         | (T/G)       |
| 15546       | CakSNP15546    | <i>Kabuli</i>    | Ca_Kabuli_Scaffold404        | 286013                         | (T/A)       |
| 15547       | CakSNP15547    | <i>Kabuli</i>    | Ca_Kabuli_Scaffold404        | 355859                         | (G/A)       |
| 15548       | CakSNP15548    | <i>Kabuli</i>    | Ca_Kabuli_Scaffold4057       | 16503                          | (C/G)       |
| 15549       | CakSNP15549    | <i>Kabuli</i>    | Ca_Kabuli_Scaffold41         | 14657                          | (C/A)       |
| 15550       | CakSNP15550    | <i>Kabuli</i>    | Ca_Kabuli_Scaffold41         | 122583                         | (G/C)       |
| 15551       | CakSNP15551    | <i>Kabuli</i>    | Ca_Kabuli_Scaffold4102       | 1035                           | (C/G)       |
| 15552       | CakSNP15552    | <i>Kabuli</i>    | Ca_Kabuli_Scaffold4102       | 1136                           | (A/G)       |
| 15553       | CakSNP15553    | <i>Kabuli</i>    | Ca_Kabuli_Scaffold4102       | 1160                           | (T/C)       |
| 15554       | CakSNP15554    | <i>Kabuli</i>    | Ca_Kabuli_Scaffold4102       | 1163                           | (G/T)       |
| 15555       | CakSNP15555    | <i>Kabuli</i>    | Ca_Kabuli_Scaffold4102       | 1346                           | (C/T)       |
| 15556       | CakSNP15556    | <i>Kabuli</i>    | Ca_Kabuli_Scaffold411        | 60078                          | (C/T)       |
| 15557       | CakSNP15557    | <i>Kabuli</i>    | Ca_Kabuli_Scaffold411        | 323122                         | (T/C)       |
| 15558       | CakSNP15558    | <i>Kabuli</i>    | Ca_Kabuli_Scaffold411        | 323140                         | (T/C)       |
| 15559       | CakSNP15559    | <i>Kabuli</i>    | Ca_Kabuli_Scaffold411        | 323141                         | (G/A)       |
| 15560       | CakSNP15560    | <i>Kabuli</i>    | Ca_Kabuli_Scaffold411        | 323147                         | (T/C)       |
| 15561       | CakSNP15561    | <i>Kabuli</i>    | Ca_Kabuli_Scaffold411        | 323161                         | (G/A)       |
| 15562       | CakSNP15562    | <i>Kabuli</i>    | Ca_Kabuli_Scaffold411        | 323162                         | (T/C)       |
| 15563       | CakSNP15563    | <i>Kabuli</i>    | Ca_Kabuli_Scaffold411        | 323167                         | (C/G)       |
| 15564       | CakSNP15564    | <i>Kabuli</i>    | Ca_Kabuli_Scaffold411        | 323179                         | (T/G)       |
| 15565       | CakSNP15565    | <i>Kabuli</i>    | Ca_Kabuli_Scaffold411        | 323114                         | (C/G)       |
| 15566       | CakSNP15566    | <i>Kabuli</i>    | Ca_Kabuli_Scaffold411        | 323215                         | (T/C)       |
| 15567       | CakSNP15567    | <i>Kabuli</i>    | Ca_Kabuli_Scaffold415        | 8479                           | (A/C)       |
| 15568       | CakSNP15568    | <i>Kabuli</i>    | Ca_Kabuli_Scaffold415        | 8529                           | (G/A)       |
| 15569       | CakSNP15569    | <i>Kabuli</i>    | Ca_Kabuli_Scaffold418        | 6092                           | (C/G)       |
| 15570       | CakSNP15570    | <i>Kabuli</i>    | Ca_Kabuli_Scaffold418        | 6094                           | (T/G)       |
| 15571       | CakSNP15571    | <i>Kabuli</i>    | Ca_Kabuli_Scaffold418        | 13769                          | (T/G)       |
| 15572       | CakSNP15572    | <i>Kabuli</i>    | Ca_Kabuli_Scaffold418        | 13804                          | (T/G)       |
| 15573       | CakSNP15573    | <i>Kabuli</i>    | Ca_Kabuli_Scaffold418        | 13808                          | (A/G)       |
| 15574       | CakSNP15574    | <i>Kabuli</i>    | Ca_Kabuli_Scaffold418        | 13811                          | (G/A)       |
| 15575       | CakSNP15575    | <i>Kabuli</i>    | Ca_Kabuli_Scaffold418        | 13812                          | (C/A)       |
| 15576       | CakSNP15576    | <i>Kabuli</i>    | Ca_Kabuli_Scaffold418        | 151140                         | (G/T)       |
| 15577       | CakSNP15577    | <i>Kabuli</i>    | Ca_Kabuli_Scaffold418        | 151205                         | (C/T)       |
| 15578       | CakSNP15578    | <i>Kabuli</i>    | Ca_Kabuli_Scaffold418        | 151256                         | (G/A)       |
| 15579       | CakSNP15579    | <i>Kabuli</i>    | Ca_Kabuli_Scaffold419        | 73537                          | (T/G)       |

| <b>S.N.</b> | <b>SNP IDs</b> | <b>Cultivars</b> | <b>Chromosomes/scaffolds</b> | <b>Physical positions (bp)</b> | <b>SNPs</b> |
|-------------|----------------|------------------|------------------------------|--------------------------------|-------------|
| 15580       | CakSNP15580    | <i>Kabuli</i>    | Ca_Kabuli_Scaffold420        | 34145                          | (T/G)       |
| 15581       | CakSNP15581    | <i>Kabuli</i>    | Ca_Kabuli_Scaffold420        | 42532                          | (G/A)       |
| 15582       | CakSNP15582    | <i>Kabuli</i>    | Ca_Kabuli_Scaffold420        | 42739                          | (C/T)       |
| 15583       | CakSNP15583    | <i>Kabuli</i>    | Ca_Kabuli_Scaffold420        | 42811                          | (C/T)       |
| 15584       | CakSNP15584    | <i>Kabuli</i>    | Ca_Kabuli_Scaffold420        | 42877                          | (T/C)       |
| 15585       | CakSNP15585    | <i>Kabuli</i>    | Ca_Kabuli_Scaffold420        | 43372                          | (C/T)       |
| 15586       | CakSNP15586    | <i>Kabuli</i>    | Ca_Kabuli_Scaffold420        | 92756                          | (C/T)       |
| 15587       | CakSNP15587    | <i>Kabuli</i>    | Ca_Kabuli_Scaffold420        | 92759                          | (A/G)       |
| 15588       | CakSNP15588    | <i>Kabuli</i>    | Ca_Kabuli_Scaffold420        | 92784                          | (C/T)       |
| 15589       | CakSNP15589    | <i>Kabuli</i>    | Ca_Kabuli_Scaffold420        | 92813                          | (G/T)       |
| 15590       | CakSNP15590    | <i>Kabuli</i>    | Ca_Kabuli_Scaffold420        | 92865                          | (G/T)       |
| 15591       | CakSNP15591    | <i>Kabuli</i>    | Ca_Kabuli_Scaffold420        | 92846                          | (C/T)       |
| 15592       | CakSNP15592    | <i>Kabuli</i>    | Ca_Kabuli_Scaffold420        | 92801                          | (A/C)       |
| 15593       | CakSNP15593    | <i>Kabuli</i>    | Ca_Kabuli_Scaffold420        | 149744                         | (C/G)       |
| 15594       | CakSNP15594    | <i>Kabuli</i>    | Ca_Kabuli_Scaffold420        | 242536                         | (G/T)       |
| 15595       | CakSNP15595    | <i>Kabuli</i>    | Ca_Kabuli_Scaffold420        | 242503                         | (C/T)       |
| 15596       | CakSNP15596    | <i>Kabuli</i>    | Ca_Kabuli_Scaffold420        | 242487                         | (A/G)       |
| 15597       | CakSNP15597    | <i>Kabuli</i>    | Ca_Kabuli_Scaffold420        | 242922                         | (A/C)       |
| 15598       | CakSNP15598    | <i>Kabuli</i>    | Ca_Kabuli_Scaffold420        | 254661                         | (T/G)       |
| 15599       | CakSNP15599    | <i>Kabuli</i>    | Ca_Kabuli_Scaffold420        | 341146                         | (T/A)       |
| 15600       | CakSNP15600    | <i>Kabuli</i>    | Ca_Kabuli_Scaffold420        | 341184                         | (A/G)       |
| 15601       | CakSNP15601    | <i>Kabuli</i>    | Ca_Kabuli_Scaffold420        | 341202                         | (T/G)       |
| 15602       | CakSNP15602    | <i>Kabuli</i>    | Ca_Kabuli_Scaffold420        | 341206                         | (G/A)       |
| 15603       | CakSNP15603    | <i>Kabuli</i>    | Ca_Kabuli_Scaffold421_1      | 25389                          | (G/A)       |
| 15604       | CakSNP15604    | <i>Kabuli</i>    | Ca_Kabuli_Scaffold421_1      | 71804                          | (A/G)       |
| 15605       | CakSNP15605    | <i>Kabuli</i>    | Ca_Kabuli_Scaffold421_1      | 71770                          | (G/T)       |
| 15606       | CakSNP15606    | <i>Kabuli</i>    | Ca_Kabuli_Scaffold421_2      | 142859                         | (G/C)       |
| 15607       | CakSNP15607    | <i>Kabuli</i>    | Ca_Kabuli_Scaffold421_2      | 341095                         | (C/A)       |
| 15608       | CakSNP15608    | <i>Kabuli</i>    | Ca_Kabuli_Scaffold421_2      | 341136                         | (C/A)       |
| 15609       | CakSNP15609    | <i>Kabuli</i>    | Ca_Kabuli_Scaffold421_2      | 446961                         | (G/A)       |
| 15610       | CakSNP15610    | <i>Kabuli</i>    | Ca_Kabuli_Scaffold421_2      | 446976                         | (C/A)       |
| 15611       | CakSNP15611    | <i>Kabuli</i>    | Ca_Kabuli_Scaffold421_2      | 446979                         | (C/T)       |
| 15612       | CakSNP15612    | <i>Kabuli</i>    | Ca_Kabuli_Scaffold424        | 32402                          | (C/G)       |
| 15613       | CakSNP15613    | <i>Kabuli</i>    | Ca_Kabuli_Scaffold4331       | 4044                           | (T/G)       |
| 15614       | CakSNP15614    | <i>Kabuli</i>    | Ca_Kabuli_Scaffold44         | 66309                          | (A/C)       |
| 15615       | CakSNP15615    | <i>Kabuli</i>    | Ca_Kabuli_Scaffold44         | 66280                          | (G/A)       |
| 15616       | CakSNP15616    | <i>Kabuli</i>    | Ca_Kabuli_Scaffold44         | 87412                          | (G/A)       |
| 15617       | CakSNP15617    | <i>Kabuli</i>    | Ca_Kabuli_Scaffold4414       | 276                            | (C/T)       |

| <b>S.N.</b> | <b>SNP IDs</b> | <b>Cultivars</b> | <b>Chromosomes/scaffolds</b> | <b>Physical positions (bp)</b> | <b>SNPs</b> |
|-------------|----------------|------------------|------------------------------|--------------------------------|-------------|
| 15618       | CakSNP15618    | <i>Kabuli</i>    | Ca_Kabuli_Scaffold4452       | 20003                          | (G/A)       |
| 15619       | CakSNP15619    | <i>Kabuli</i>    | Ca_Kabuli_Scaffold4452       | 20005                          | (G/A)       |
| 15620       | CakSNP15620    | <i>Kabuli</i>    | Ca_Kabuli_Scaffold4452       | 20038                          | (A/G)       |
| 15621       | CakSNP15621    | <i>Kabuli</i>    | Ca_Kabuli_Scaffold4452       | 20010                          | (G/A)       |
| 15622       | CakSNP15622    | <i>Kabuli</i>    | Ca_Kabuli_Scaffold4452       | 29414                          | (G/T)       |
| 15623       | CakSNP15623    | <i>Kabuli</i>    | Ca_Kabuli_Scaffold4452       | 36715                          | (A/T)       |
| 15624       | CakSNP15624    | <i>Kabuli</i>    | Ca_Kabuli_Scaffold4452       | 69950                          | (A/C)       |
| 15625       | CakSNP15625    | <i>Kabuli</i>    | Ca_Kabuli_Scaffold4452       | 70041                          | (T/C)       |
| 15626       | CakSNP15626    | <i>Kabuli</i>    | Ca_Kabuli_Scaffold450        | 132367                         | (C/T)       |
| 15627       | CakSNP15627    | <i>Kabuli</i>    | Ca_Kabuli_Scaffold450        | 132427                         | (A/T)       |
| 15628       | CakSNP15628    | <i>Kabuli</i>    | Ca_Kabuli_Scaffold450        | 197287                         | (G/A)       |
| 15629       | CakSNP15629    | <i>Kabuli</i>    | Ca_Kabuli_Scaffold450        | 197272                         | (G/A)       |
| 15630       | CakSNP15630    | <i>Kabuli</i>    | Ca_Kabuli_Scaffold450        | 197262                         | (T/G)       |
| 15631       | CakSNP15631    | <i>Kabuli</i>    | Ca_Kabuli_Scaffold450        | 197230                         | (C/A)       |
| 15632       | CakSNP15632    | <i>Kabuli</i>    | Ca_Kabuli_Scaffold450        | 197226                         | (G/A)       |
| 15633       | CakSNP15633    | <i>Kabuli</i>    | Ca_Kabuli_Scaffold450        | 250303                         | (G/T)       |
| 15634       | CakSNP15634    | <i>Kabuli</i>    | Ca_Kabuli_Scaffold451        | 103555                         | (G/C)       |
| 15635       | CakSNP15635    | <i>Kabuli</i>    | Ca_Kabuli_Scaffold451        | 103596                         | (A/G)       |
| 15636       | CakSNP15636    | <i>Kabuli</i>    | Ca_Kabuli_Scaffold451        | 117231                         | (A/G)       |
| 15637       | CakSNP15637    | <i>Kabuli</i>    | Ca_Kabuli_Scaffold451        | 117300                         | (C/A)       |
| 15638       | CakSNP15638    | <i>Kabuli</i>    | Ca_Kabuli_Scaffold4511       | 40072                          | (C/A)       |
| 15639       | CakSNP15639    | <i>Kabuli</i>    | Ca_Kabuli_Scaffold4511       | 40014                          | (C/T)       |
| 15640       | CakSNP15640    | <i>Kabuli</i>    | Ca_Kabuli_Scaffold4511       | 40089                          | (C/T)       |
| 15641       | CakSNP15641    | <i>Kabuli</i>    | Ca_Kabuli_Scaffold452        | 1892                           | (G/A)       |
| 15642       | CakSNP15642    | <i>Kabuli</i>    | Ca_Kabuli_Scaffold452        | 1881                           | (A/G)       |
| 15643       | CakSNP15643    | <i>Kabuli</i>    | Ca_Kabuli_Scaffold452        | 1841                           | (A/G)       |
| 15644       | CakSNP15644    | <i>Kabuli</i>    | Ca_Kabuli_Scaffold452        | 1837                           | (A/C)       |
| 15645       | CakSNP15645    | <i>Kabuli</i>    | Ca_Kabuli_Scaffold452        | 1836                           | (A/G)       |
| 15646       | CakSNP15646    | <i>Kabuli</i>    | Ca_Kabuli_Scaffold452        | 1835                           | (C/T)       |
| 15647       | CakSNP15647    | <i>Kabuli</i>    | Ca_Kabuli_Scaffold453        | 303193                         | (T/C)       |
| 15648       | CakSNP15648    | <i>Kabuli</i>    | Ca_Kabuli_Scaffold453        | 303201                         | (G/C)       |
| 15649       | CakSNP15649    | <i>Kabuli</i>    | Ca_Kabuli_Scaffold453        | 303246                         | (A/G)       |
| 15650       | CakSNP15650    | <i>Kabuli</i>    | Ca_Kabuli_Scaffold453        | 303248                         | (C/T)       |
| 15651       | CakSNP15651    | <i>Kabuli</i>    | Ca_Kabuli_Scaffold453        | 303259                         | (C/G)       |
| 15652       | CakSNP15652    | <i>Kabuli</i>    | Ca_Kabuli_Scaffold46         | 39438                          | (C/A)       |
| 15653       | CakSNP15653    | <i>Kabuli</i>    | Ca_Kabuli_Scaffold46         | 39470                          | (C/T)       |
| 15654       | CakSNP15654    | <i>Kabuli</i>    | Ca_Kabuli_Scaffold461        | 20652                          | (C/A)       |
| 15655       | CakSNP15655    | <i>Kabuli</i>    | Ca_Kabuli_Scaffold461        | 20629                          | (A/T)       |

| <b>S.N.</b> | <b>SNP IDs</b> | <b>Cultivars</b> | <b>Chromosomes/scaffolds</b> | <b>Physical positions (bp)</b> | <b>SNPs</b> |
|-------------|----------------|------------------|------------------------------|--------------------------------|-------------|
| 15656       | CakSNP15656    | <i>Kabuli</i>    | Ca_Kabuli_Scaffold461        | 20603                          | (C/T)       |
| 15657       | CakSNP15657    | <i>Kabuli</i>    | Ca_Kabuli_Scaffold461        | 20599                          | (C/A)       |
| 15658       | CakSNP15658    | <i>Kabuli</i>    | Ca_Kabuli_Scaffold4620       | 2699                           | (T/C)       |
| 15659       | CakSNP15659    | <i>Kabuli</i>    | Ca_Kabuli_Scaffold4620       | 23442                          | (T/C)       |
| 15660       | CakSNP15660    | <i>Kabuli</i>    | Ca_Kabuli_Scaffold4641       | 511                            | (G/A)       |
| 15661       | CakSNP15661    | <i>Kabuli</i>    | Ca_Kabuli_Scaffold4641       | 547                            | (A/C)       |
| 15662       | CakSNP15662    | <i>Kabuli</i>    | Ca_Kabuli_Scaffold4641       | 553                            | (C/A)       |
| 15663       | CakSNP15663    | <i>Kabuli</i>    | Ca_Kabuli_Scaffold4641       | 556                            | (G/C)       |
| 15664       | CakSNP15664    | <i>Kabuli</i>    | Ca_Kabuli_Scaffold4662       | 7683                           | (T/C)       |
| 15665       | CakSNP15665    | <i>Kabuli</i>    | Ca_Kabuli_Scaffold4662       | 7651                           | (T/C)       |
| 15666       | CakSNP15666    | <i>Kabuli</i>    | Ca_Kabuli_Scaffold4662       | 7638                           | (C/T)       |
| 15667       | CakSNP15667    | <i>Kabuli</i>    | Ca_Kabuli_Scaffold4662       | 7632                           | (A/G)       |
| 15668       | CakSNP15668    | <i>Kabuli</i>    | Ca_Kabuli_Scaffold4695       | 5685                           | (A/G)       |
| 15669       | CakSNP15669    | <i>Kabuli</i>    | Ca_Kabuli_Scaffold470        | 7175                           | (A/G)       |
| 15670       | CakSNP15670    | <i>Kabuli</i>    | Ca_Kabuli_Scaffold473        | 24996                          | (G/A)       |
| 15671       | CakSNP15671    | <i>Kabuli</i>    | Ca_Kabuli_Scaffold473        | 24984                          | (T/C)       |
| 15672       | CakSNP15672    | <i>Kabuli</i>    | Ca_Kabuli_Scaffold473        | 24973                          | (T/C)       |
| 15673       | CakSNP15673    | <i>Kabuli</i>    | Ca_Kabuli_Scaffold475        | 135286                         | (C/A)       |
| 15674       | CakSNP15674    | <i>Kabuli</i>    | Ca_Kabuli_Scaffold475        | 135290                         | (G/A)       |
| 15675       | CakSNP15675    | <i>Kabuli</i>    | Ca_Kabuli_Scaffold477        | 51898                          | (C/T)       |
| 15676       | CakSNP15676    | <i>Kabuli</i>    | Ca_Kabuli_Scaffold4777       | 10546                          | (G/T)       |
| 15677       | CakSNP15677    | <i>Kabuli</i>    | Ca_Kabuli_Scaffold4777       | 16224                          | (A/T)       |
| 15678       | CakSNP15678    | <i>Kabuli</i>    | Ca_Kabuli_Scaffold4777       | 16239                          | (G/T)       |
| 15679       | CakSNP15679    | <i>Kabuli</i>    | Ca_Kabuli_Scaffold4777       | 55347                          | (G/T)       |
| 15680       | CakSNP15680    | <i>Kabuli</i>    | Ca_Kabuli_Scaffold4777       | 72624                          | (G/A)       |
| 15681       | CakSNP15681    | <i>Kabuli</i>    | Ca_Kabuli_Scaffold4777       | 76950                          | (C/A)       |
| 15682       | CakSNP15682    | <i>Kabuli</i>    | Ca_Kabuli_Scaffold4777       | 106820                         | (A/G)       |
| 15683       | CakSNP15683    | <i>Kabuli</i>    | Ca_Kabuli_Scaffold4777       | 112193                         | (A/C)       |
| 15684       | CakSNP15684    | <i>Kabuli</i>    | Ca_Kabuli_Scaffold48         | 261719                         | (A/G)       |
| 15685       | CakSNP15685    | <i>Kabuli</i>    | Ca_Kabuli_Scaffold48         | 420925                         | (A/G)       |
| 15686       | CakSNP15686    | <i>Kabuli</i>    | Ca_Kabuli_Scaffold480        | 67375                          | (T/C)       |
| 15687       | CakSNP15687    | <i>Kabuli</i>    | Ca_Kabuli_Scaffold4836       | 5866                           | (T/A)       |
| 15688       | CakSNP15688    | <i>Kabuli</i>    | Ca_Kabuli_Scaffold4836       | 5891                           | (A/T)       |
| 15689       | CakSNP15689    | <i>Kabuli</i>    | Ca_Kabuli_Scaffold4836       | 5909                           | (G/A)       |
| 15690       | CakSNP15690    | <i>Kabuli</i>    | Ca_Kabuli_Scaffold4836       | 5846                           | (C/T)       |
| 15691       | CakSNP15691    | <i>Kabuli</i>    | Ca_Kabuli_Scaffold484        | 203947                         | (C/T)       |
| 15692       | CakSNP15692    | <i>Kabuli</i>    | Ca_Kabuli_Scaffold484        | 209786                         | (A/C)       |
| 15693       | CakSNP15693    | <i>Kabuli</i>    | Ca_Kabuli_Scaffold484        | 243567                         | (C/T)       |

| <b>S.N.</b> | <b>SNP IDs</b> | <b>Cultivars</b> | <b>Chromosomes/scaffolds</b> | <b>Physical positions (bp)</b> | <b>SNPs</b> |
|-------------|----------------|------------------|------------------------------|--------------------------------|-------------|
| 15694       | CakSNP15694    | <i>Kabuli</i>    | Ca_Kabuli_Scaffold484        | 243575                         | (T/A)       |
| 15695       | CakSNP15695    | <i>Kabuli</i>    | Ca_Kabuli_Scaffold484        | 647868                         | (C/T)       |
| 15696       | CakSNP15696    | <i>Kabuli</i>    | Ca_Kabuli_Scaffold484        | 647866                         | (A/G)       |
| 15697       | CakSNP15697    | <i>Kabuli</i>    | Ca_Kabuli_Scaffold484        | 647809                         | (A/T)       |
| 15698       | CakSNP15698    | <i>Kabuli</i>    | Ca_Kabuli_Scaffold484        | 660749                         | (C/G)       |
| 15699       | CakSNP15699    | <i>Kabuli</i>    | Ca_Kabuli_Scaffold485        | 103572                         | (C/T)       |
| 15700       | CakSNP15700    | <i>Kabuli</i>    | Ca_Kabuli_Scaffold485        | 103546                         | (A/G)       |
| 15701       | CakSNP15701    | <i>Kabuli</i>    | Ca_Kabuli_Scaffold485        | 103528                         | (A/C)       |
| 15702       | CakSNP15702    | <i>Kabuli</i>    | Ca_Kabuli_Scaffold485        | 123578                         | (T/C)       |
| 15703       | CakSNP15703    | <i>Kabuli</i>    | Ca_Kabuli_Scaffold485        | 123642                         | (G/A)       |
| 15704       | CakSNP15704    | <i>Kabuli</i>    | Ca_Kabuli_Scaffold495        | 128200                         | (A/T)       |
| 15705       | CakSNP15705    | <i>Kabuli</i>    | Ca_Kabuli_Scaffold496        | 53652                          | (G/A)       |
| 15706       | CakSNP15706    | <i>Kabuli</i>    | Ca_Kabuli_Scaffold496        | 53657                          | (A/T)       |
| 15707       | CakSNP15707    | <i>Kabuli</i>    | Ca_Kabuli_Scaffold496        | 53616                          | (G/T)       |
| 15708       | CakSNP15708    | <i>Kabuli</i>    | Ca_Kabuli_Scaffold496        | 53587                          | (A/G)       |
| 15709       | CakSNP15709    | <i>Kabuli</i>    | Ca_Kabuli_Scaffold496        | 175429                         | (G/A)       |
| 15710       | CakSNP15710    | <i>Kabuli</i>    | Ca_Kabuli_Scaffold496        | 175493                         | (G/A)       |
| 15711       | CakSNP15711    | <i>Kabuli</i>    | Ca_Kabuli_Scaffold498        | 146772                         | (A/C)       |
| 15712       | CakSNP15712    | <i>Kabuli</i>    | Ca_Kabuli_Scaffold498        | 148658                         | (G/T)       |
| 15713       | CakSNP15713    | <i>Kabuli</i>    | Ca_Kabuli_Scaffold498        | 164638                         | (T/C)       |
| 15714       | CakSNP15714    | <i>Kabuli</i>    | Ca_Kabuli_Scaffold498        | 164615                         | (G/C)       |
| 15715       | CakSNP15715    | <i>Kabuli</i>    | Ca_Kabuli_Scaffold498        | 164590                         | (T/A)       |
| 15716       | CakSNP15716    | <i>Kabuli</i>    | Ca_Kabuli_Scaffold50         | 153593                         | (T/A)       |
| 15717       | CakSNP15717    | <i>Kabuli</i>    | Ca_Kabuli_Scaffold50         | 153599                         | (C/G)       |
| 15718       | CakSNP15718    | <i>Kabuli</i>    | Ca_Kabuli_Scaffold50         | 153631                         | (C/T)       |
| 15719       | CakSNP15719    | <i>Kabuli</i>    | Ca_Kabuli_Scaffold50         | 153734                         | (A/C)       |
| 15720       | CakSNP15720    | <i>Kabuli</i>    | Ca_Kabuli_Scaffold50         | 153851                         | (T/C)       |
| 15721       | CakSNP15721    | <i>Kabuli</i>    | Ca_Kabuli_Scaffold50         | 191625                         | (T/C)       |
| 15722       | CakSNP15722    | <i>Kabuli</i>    | Ca_Kabuli_Scaffold50         | 201219                         | (C/G)       |
| 15723       | CakSNP15723    | <i>Kabuli</i>    | Ca_Kabuli_Scaffold50         | 448866                         | (G/A)       |
| 15724       | CakSNP15724    | <i>Kabuli</i>    | Ca_Kabuli_Scaffold510        | 12378                          | (T/A)       |
| 15725       | CakSNP15725    | <i>Kabuli</i>    | Ca_Kabuli_Scaffold510        | 12383                          | (G/T)       |
| 15726       | CakSNP15726    | <i>Kabuli</i>    | Ca_Kabuli_Scaffold510        | 12394                          | (C/A)       |
| 15727       | CakSNP15727    | <i>Kabuli</i>    | Ca_Kabuli_Scaffold510        | 12414                          | (C/T)       |
| 15728       | CakSNP15728    | <i>Kabuli</i>    | Ca_Kabuli_Scaffold510        | 12434                          | (C/T)       |
| 15729       | CakSNP15729    | <i>Kabuli</i>    | Ca_Kabuli_Scaffold511        | 10450                          | (T/G)       |
| 15730       | CakSNP15730    | <i>Kabuli</i>    | Ca_Kabuli_Scaffold511        | 10520                          | (G/T)       |
| 15731       | CakSNP15731    | <i>Kabuli</i>    | Ca_Kabuli_Scaffold511        | 173376                         | (C/A)       |



| <b>S.N.</b> | <b>SNP IDs</b> | <b>Cultivars</b> | <b>Chromosomes/scaffolds</b> | <b>Physical positions (bp)</b> | <b>SNPs</b> |
|-------------|----------------|------------------|------------------------------|--------------------------------|-------------|
| 15732       | CakSNP15732    | <i>Kabuli</i>    | Ca_Kabuli_Scaffold511        | 173377                         | (A/G)       |
| 15733       | CakSNP15733    | <i>Kabuli</i>    | Ca_Kabuli_Scaffold511        | 173378                         | (G/A)       |
| 15734       | CakSNP15734    | <i>Kabuli</i>    | Ca_Kabuli_Scaffold513        | 7188                           | (A/C)       |
| 15735       | CakSNP15735    | <i>Kabuli</i>    | Ca_Kabuli_Scaffold5163       | 2301                           | (A/G)       |
| 15736       | CakSNP15736    | <i>Kabuli</i>    | Ca_Kabuli_Scaffold5185       | 1091                           | (G/A)       |
| 15737       | CakSNP15737    | <i>Kabuli</i>    | Ca_Kabuli_Scaffold520        | 143359                         | (C/T)       |
| 15738       | CakSNP15738    | <i>Kabuli</i>    | Ca_Kabuli_Scaffold520        | 143358                         | (G/A)       |
| 15739       | CakSNP15739    | <i>Kabuli</i>    | Ca_Kabuli_Scaffold520        | 143356                         | (C/G)       |
| 15740       | CakSNP15740    | <i>Kabuli</i>    | Ca_Kabuli_Scaffold520        | 143342                         | (G/A)       |
| 15741       | CakSNP15741    | <i>Kabuli</i>    | Ca_Kabuli_Scaffold520        | 143336                         | (T/C)       |
| 15742       | CakSNP15742    | <i>Kabuli</i>    | Ca_Kabuli_Scaffold520        | 143334                         | (G/A)       |
| 15743       | CakSNP15743    | <i>Kabuli</i>    | Ca_Kabuli_Scaffold520        | 143333                         | (A/T)       |
| 15744       | CakSNP15744    | <i>Kabuli</i>    | Ca_Kabuli_Scaffold520        | 143324                         | (G/A)       |
| 15745       | CakSNP15745    | <i>Kabuli</i>    | Ca_Kabuli_Scaffold520        | 143317                         | (T/A)       |
| 15746       | CakSNP15746    | <i>Kabuli</i>    | Ca_Kabuli_Scaffold520        | 143300                         | (G/A)       |
| 15747       | CakSNP15747    | <i>Kabuli</i>    | Ca_Kabuli_Scaffold520        | 143294                         | (G/A)       |
| 15748       | CakSNP15748    | <i>Kabuli</i>    | Ca_Kabuli_Scaffold520        | 143291                         | (G/A)       |
| 15749       | CakSNP15749    | <i>Kabuli</i>    | Ca_Kabuli_Scaffold520        | 143375                         | (G/A)       |
| 15750       | CakSNP15750    | <i>Kabuli</i>    | Ca_Kabuli_Scaffold520        | 143372                         | (G/A)       |
| 15751       | CakSNP15751    | <i>Kabuli</i>    | Ca_Kabuli_Scaffold520        | 143355                         | (C/T)       |
| 15752       | CakSNP15752    | <i>Kabuli</i>    | Ca_Kabuli_Scaffold520        | 143390                         | (A/G)       |
| 15753       | CakSNP15753    | <i>Kabuli</i>    | Ca_Kabuli_Scaffold520        | 143391                         | (A/C)       |
| 15754       | CakSNP15754    | <i>Kabuli</i>    | Ca_Kabuli_Scaffold528        | 191764                         | (A/G)       |
| 15755       | CakSNP15755    | <i>Kabuli</i>    | Ca_Kabuli_Scaffold528        | 191835                         | (A/G)       |
| 15756       | CakSNP15756    | <i>Kabuli</i>    | Ca_Kabuli_Scaffold528        | 232014                         | (A/C)       |
| 15757       | CakSNP15757    | <i>Kabuli</i>    | Ca_Kabuli_Scaffold53         | 49273                          | (A/G)       |
| 15758       | CakSNP15758    | <i>Kabuli</i>    | Ca_Kabuli_Scaffold53         | 123293                         | (C/A)       |
| 15759       | CakSNP15759    | <i>Kabuli</i>    | Ca_Kabuli_Scaffold531        | 2668                           | (C/T)       |
| 15760       | CakSNP15760    | <i>Kabuli</i>    | Ca_Kabuli_Scaffold531        | 2674                           | (C/T)       |
| 15761       | CakSNP15761    | <i>Kabuli</i>    | Ca_Kabuli_Scaffold531        | 65242                          | (T/G)       |
| 15762       | CakSNP15762    | <i>Kabuli</i>    | Ca_Kabuli_Scaffold531        | 101520                         | (C/G)       |
| 15763       | CakSNP15763    | <i>Kabuli</i>    | Ca_Kabuli_Scaffold531        | 124019                         | (T/G)       |
| 15764       | CakSNP15764    | <i>Kabuli</i>    | Ca_Kabuli_Scaffold5328       | 70                             | (G/A)       |
| 15765       | CakSNP15765    | <i>Kabuli</i>    | Ca_Kabuli_Scaffold5328       | 85                             | (C/T)       |
| 15766       | CakSNP15766    | <i>Kabuli</i>    | Ca_Kabuli_Scaffold5328       | 86                             | (C/T)       |
| 15767       | CakSNP15767    | <i>Kabuli</i>    | Ca_Kabuli_Scaffold5328       | 117                            | (C/T)       |
| 15768       | CakSNP15768    | <i>Kabuli</i>    | Ca_Kabuli_Scaffold535        | 156836                         | (G/A)       |
| 15769       | CakSNP15769    | <i>Kabuli</i>    | Ca_Kabuli_Scaffold5358       | 2561                           | (C/A)       |

| <b>S.N.</b> | <b>SNP IDs</b> | <b>Cultivars</b> | <b>Chromosomes/scaffolds</b> | <b>Physical positions (bp)</b> | <b>SNPs</b> |
|-------------|----------------|------------------|------------------------------|--------------------------------|-------------|
| 15770       | CakSNP15770    | <i>Kabuli</i>    | Ca_Kabuli_Scaffold5358       | 3329                           | (C/A)       |
| 15771       | CakSNP15771    | <i>Kabuli</i>    | Ca_Kabuli_Scaffold537        | 216656                         | (A/G)       |
| 15772       | CakSNP15772    | <i>Kabuli</i>    | Ca_Kabuli_Scaffold537        | 216669                         | (T/A)       |
| 15773       | CakSNP15773    | <i>Kabuli</i>    | Ca_Kabuli_Scaffold537        | 216846                         | (C/T)       |
| 15774       | CakSNP15774    | <i>Kabuli</i>    | Ca_Kabuli_Scaffold537        | 216829                         | (C/G)       |
| 15775       | CakSNP15775    | <i>Kabuli</i>    | Ca_Kabuli_Scaffold537        | 216778                         | (T/A)       |
| 15776       | CakSNP15776    | <i>Kabuli</i>    | Ca_Kabuli_Scaffold537        | 223108                         | (T/C)       |
| 15777       | CakSNP15777    | <i>Kabuli</i>    | Ca_Kabuli_Scaffold543        | 20780                          | (T/G)       |
| 15778       | CakSNP15778    | <i>Kabuli</i>    | Ca_Kabuli_Scaffold543        | 20819                          | (T/C)       |
| 15779       | CakSNP15779    | <i>Kabuli</i>    | Ca_Kabuli_Scaffold543        | 20827                          | (G/T)       |
| 15780       | CakSNP15780    | <i>Kabuli</i>    | Ca_Kabuli_Scaffold543        | 143169                         | (C/T)       |
| 15781       | CakSNP15781    | <i>Kabuli</i>    | Ca_Kabuli_Scaffold543        | 143182                         | (G/A)       |
| 15782       | CakSNP15782    | <i>Kabuli</i>    | Ca_Kabuli_Scaffold543        | 143185                         | (A/G)       |
| 15783       | CakSNP15783    | <i>Kabuli</i>    | Ca_Kabuli_Scaffold543        | 143191                         | (G/A)       |
| 15784       | CakSNP15784    | <i>Kabuli</i>    | Ca_Kabuli_Scaffold543        | 266748                         | (A/C)       |
| 15785       | CakSNP15785    | <i>Kabuli</i>    | Ca_Kabuli_Scaffold543        | 266729                         | (A/C)       |
| 15786       | CakSNP15786    | <i>Kabuli</i>    | Ca_Kabuli_Scaffold543        | 266848                         | (A/C)       |
| 15787       | CakSNP15787    | <i>Kabuli</i>    | Ca_Kabuli_Scaffold545        | 17699                          | (A/C)       |
| 15788       | CakSNP15788    | <i>Kabuli</i>    | Ca_Kabuli_Scaffold545        | 138848                         | (T/C)       |
| 15789       | CakSNP15789    | <i>Kabuli</i>    | Ca_Kabuli_Scaffold545        | 139118                         | (A/T)       |
| 15790       | CakSNP15790    | <i>Kabuli</i>    | Ca_Kabuli_Scaffold545        | 146720                         | (A/G)       |
| 15791       | CakSNP15791    | <i>Kabuli</i>    | Ca_Kabuli_Scaffold545        | 147549                         | (G/A)       |
| 15792       | CakSNP15792    | <i>Kabuli</i>    | Ca_Kabuli_Scaffold545        | 147568                         | (T/G)       |
| 15793       | CakSNP15793    | <i>Kabuli</i>    | Ca_Kabuli_Scaffold545        | 226799                         | (G/A)       |
| 15794       | CakSNP15794    | <i>Kabuli</i>    | Ca_Kabuli_Scaffold545        | 226769                         | (G/C)       |
| 15795       | CakSNP15795    | <i>Kabuli</i>    | Ca_Kabuli_Scaffold548        | 17462                          | (G/A)       |
| 15796       | CakSNP15796    | <i>Kabuli</i>    | Ca_Kabuli_Scaffold548        | 231396                         | (G/A)       |
| 15797       | CakSNP15797    | <i>Kabuli</i>    | Ca_Kabuli_Scaffold548        | 231338                         | (G/A)       |
| 15798       | CakSNP15798    | <i>Kabuli</i>    | Ca_Kabuli_Scaffold5511       | 353                            | (G/A)       |
| 15799       | CakSNP15799    | <i>Kabuli</i>    | Ca_Kabuli_Scaffold5511       | 361                            | (G/A)       |
| 15800       | CakSNP15800    | <i>Kabuli</i>    | Ca_Kabuli_Scaffold5511       | 366                            | (G/A)       |
| 15801       | CakSNP15801    | <i>Kabuli</i>    | Ca_Kabuli_Scaffold5511       | 376                            | (C/T)       |
| 15802       | CakSNP15802    | <i>Kabuli</i>    | Ca_Kabuli_Scaffold5511       | 387                            | (T/C)       |
| 15803       | CakSNP15803    | <i>Kabuli</i>    | Ca_Kabuli_Scaffold5511       | 388                            | (G/A)       |
| 15804       | CakSNP15804    | <i>Kabuli</i>    | Ca_Kabuli_Scaffold5511       | 365                            | (T/G)       |
| 15805       | CakSNP15805    | <i>Kabuli</i>    | Ca_Kabuli_Scaffold5511       | 396                            | (G/A)       |
| 15806       | CakSNP15806    | <i>Kabuli</i>    | Ca_Kabuli_Scaffold5511       | 458                            | (G/A)       |
| 15807       | CakSNP15807    | <i>Kabuli</i>    | Ca_Kabuli_Scaffold5511       | 447                            | (A/C)       |

| <b>S.N.</b> | <b>SNP IDs</b> | <b>Cultivars</b> | <b>Chromosomes/scaffolds</b> | <b>Physical positions (bp)</b> | <b>SNPs</b> |
|-------------|----------------|------------------|------------------------------|--------------------------------|-------------|
| 15808       | CakSNP15808    | <i>Kabuli</i>    | Ca_Kabuli_Scaffold5511       | 434                            | (C/T)       |
| 15809       | CakSNP15809    | <i>Kabuli</i>    | Ca_Kabuli_Scaffold5511       | 404                            | (T/G)       |
| 15810       | CakSNP15810    | <i>Kabuli</i>    | Ca_Kabuli_Scaffold553        | 302105                         | (T/C)       |
| 15811       | CakSNP15811    | <i>Kabuli</i>    | Ca_Kabuli_Scaffold553        | 302098                         | (T/C)       |
| 15812       | CakSNP15812    | <i>Kabuli</i>    | Ca_Kabuli_Scaffold553        | 310715                         | (A/G)       |
| 15813       | CakSNP15813    | <i>Kabuli</i>    | Ca_Kabuli_Scaffold553        | 310759                         | (T/A)       |
| 15814       | CakSNP15814    | <i>Kabuli</i>    | Ca_Kabuli_Scaffold553        | 402702                         | (T/C)       |
| 15815       | CakSNP15815    | <i>Kabuli</i>    | Ca_Kabuli_Scaffold553        | 441845                         | (T/C)       |
| 15816       | CakSNP15816    | <i>Kabuli</i>    | Ca_Kabuli_Scaffold553        | 441881                         | (T/C)       |
| 15817       | CakSNP15817    | <i>Kabuli</i>    | Ca_Kabuli_Scaffold553        | 441898                         | (G/A)       |
| 15818       | CakSNP15818    | <i>Kabuli</i>    | Ca_Kabuli_Scaffold553        | 550789                         | (G/C)       |
| 15819       | CakSNP15819    | <i>Kabuli</i>    | Ca_Kabuli_Scaffold553        | 607503                         | (G/T)       |
| 15820       | CakSNP15820    | <i>Kabuli</i>    | Ca_Kabuli_Scaffold553        | 607572                         | (T/C)       |
| 15821       | CakSNP15821    | <i>Kabuli</i>    | Ca_Kabuli_Scaffold553        | 794383                         | (A/G)       |
| 15822       | CakSNP15822    | <i>Kabuli</i>    | Ca_Kabuli_Scaffold553        | 794404                         | (G/A)       |
| 15823       | CakSNP15823    | <i>Kabuli</i>    | Ca_Kabuli_Scaffold553        | 794431                         | (T/C)       |
| 15824       | CakSNP15824    | <i>Kabuli</i>    | Ca_Kabuli_Scaffold553        | 794439                         | (G/T)       |
| 15825       | CakSNP15825    | <i>Kabuli</i>    | Ca_Kabuli_Scaffold561        | 46046                          | (T/G)       |
| 15826       | CakSNP15826    | <i>Kabuli</i>    | Ca_Kabuli_Scaffold561        | 49174                          | (G/A)       |
| 15827       | CakSNP15827    | <i>Kabuli</i>    | Ca_Kabuli_Scaffold561        | 95414                          | (A/C)       |
| 15828       | CakSNP15828    | <i>Kabuli</i>    | Ca_Kabuli_Scaffold561        | 95386                          | (G/A)       |
| 15829       | CakSNP15829    | <i>Kabuli</i>    | Ca_Kabuli_Scaffold562        | 221706                         | (T/C)       |
| 15830       | CakSNP15830    | <i>Kabuli</i>    | Ca_Kabuli_Scaffold562        | 221696                         | (T/G)       |
| 15831       | CakSNP15831    | <i>Kabuli</i>    | Ca_Kabuli_Scaffold562        | 221686                         | (C/A)       |
| 15832       | CakSNP15832    | <i>Kabuli</i>    | Ca_Kabuli_Scaffold562        | 221713                         | (G/A)       |
| 15833       | CakSNP15833    | <i>Kabuli</i>    | Ca_Kabuli_Scaffold562        | 221714                         | (C/T)       |
| 15834       | CakSNP15834    | <i>Kabuli</i>    | Ca_Kabuli_Scaffold562        | 221735                         | (G/A)       |
| 15835       | CakSNP15835    | <i>Kabuli</i>    | Ca_Kabuli_Scaffold562        | 221795                         | (C/T)       |
| 15836       | CakSNP15836    | <i>Kabuli</i>    | Ca_Kabuli_Scaffold562        | 221748                         | (C/A)       |
| 15837       | CakSNP15837    | <i>Kabuli</i>    | Ca_Kabuli_Scaffold562        | 221758                         | (G/A)       |
| 15838       | CakSNP15838    | <i>Kabuli</i>    | Ca_Kabuli_Scaffold562        | 221769                         | (T/A)       |
| 15839       | CakSNP15839    | <i>Kabuli</i>    | Ca_Kabuli_Scaffold562        | 221778                         | (G/A)       |
| 15840       | CakSNP15840    | <i>Kabuli</i>    | Ca_Kabuli_Scaffold562        | 221779                         | (G/A)       |
| 15841       | CakSNP15841    | <i>Kabuli</i>    | Ca_Kabuli_Scaffold562        | 221788                         | (G/A)       |
| 15842       | CakSNP15842    | <i>Kabuli</i>    | Ca_Kabuli_Scaffold562        | 221828                         | (T/A)       |
| 15843       | CakSNP15843    | <i>Kabuli</i>    | Ca_Kabuli_Scaffold562        | 221792                         | (C/A)       |
| 15844       | CakSNP15844    | <i>Kabuli</i>    | Ca_Kabuli_Scaffold562        | 255362                         | (G/A)       |
| 15845       | CakSNP15845    | <i>Kabuli</i>    | Ca_Kabuli_Scaffold562        | 255295                         | (G/A)       |

| <b>S.N.</b> | <b>SNP IDs</b> | <b>Cultivars</b> | <b>Chromosomes/scaffolds</b> | <b>Physical positions (bp)</b> | <b>SNPs</b> |
|-------------|----------------|------------------|------------------------------|--------------------------------|-------------|
| 15846       | CakSNP15846    | <i>Kabuli</i>    | Ca_Kabuli_Scaffold562        | 289080                         | (C/A)       |
| 15847       | CakSNP15847    | <i>Kabuli</i>    | Ca_Kabuli_Scaffold562        | 290071                         | (C/T)       |
| 15848       | CakSNP15848    | <i>Kabuli</i>    | Ca_Kabuli_Scaffold5714       | 24882                          | (A/C)       |
| 15849       | CakSNP15849    | <i>Kabuli</i>    | Ca_Kabuli_Scaffold5714       | 36359                          | (G/C)       |
| 15850       | CakSNP15850    | <i>Kabuli</i>    | Ca_Kabuli_Scaffold5730       | 239                            | (G/A)       |
| 15851       | CakSNP15851    | <i>Kabuli</i>    | Ca_Kabuli_Scaffold5730       | 192                            | (A/G)       |
| 15852       | CakSNP15852    | <i>Kabuli</i>    | Ca_Kabuli_Scaffold5730       | 227                            | (G/A)       |
| 15853       | CakSNP15853    | <i>Kabuli</i>    | Ca_Kabuli_Scaffold575        | 36084                          | (T/C)       |
| 15854       | CakSNP15854    | <i>Kabuli</i>    | Ca_Kabuli_Scaffold575        | 36135                          | (T/C)       |
| 15855       | CakSNP15855    | <i>Kabuli</i>    | Ca_Kabuli_Scaffold575        | 36238                          | (C/T)       |
| 15856       | CakSNP15856    | <i>Kabuli</i>    | Ca_Kabuli_Scaffold575        | 45254                          | (C/T)       |
| 15857       | CakSNP15857    | <i>Kabuli</i>    | Ca_Kabuli_Scaffold575        | 45250                          | (T/C)       |
| 15858       | CakSNP15858    | <i>Kabuli</i>    | Ca_Kabuli_Scaffold575        | 45239                          | (G/T)       |
| 15859       | CakSNP15859    | <i>Kabuli</i>    | Ca_Kabuli_Scaffold575        | 45236                          | (G/A)       |
| 15860       | CakSNP15860    | <i>Kabuli</i>    | Ca_Kabuli_Scaffold575        | 45233                          | (G/A)       |
| 15861       | CakSNP15861    | <i>Kabuli</i>    | Ca_Kabuli_Scaffold575        | 45215                          | (C/A)       |
| 15862       | CakSNP15862    | <i>Kabuli</i>    | Ca_Kabuli_Scaffold575        | 45192                          | (C/T)       |
| 15863       | CakSNP15863    | <i>Kabuli</i>    | Ca_Kabuli_Scaffold575        | 45279                          | (G/C)       |
| 15864       | CakSNP15864    | <i>Kabuli</i>    | Ca_Kabuli_Scaffold575        | 45245                          | (G/A)       |
| 15865       | CakSNP15865    | <i>Kabuli</i>    | Ca_Kabuli_Scaffold575        | 45237                          | (C/T)       |
| 15866       | CakSNP15866    | <i>Kabuli</i>    | Ca_Kabuli_Scaffold575        | 45234                          | (C/T)       |
| 15867       | CakSNP15867    | <i>Kabuli</i>    | Ca_Kabuli_Scaffold575        | 110772                         | (G/T)       |
| 15868       | CakSNP15868    | <i>Kabuli</i>    | Ca_Kabuli_Scaffold575        | 110785                         | (C/T)       |
| 15869       | CakSNP15869    | <i>Kabuli</i>    | Ca_Kabuli_Scaffold575        | 110765                         | (C/T)       |
| 15870       | CakSNP15870    | <i>Kabuli</i>    | Ca_Kabuli_Scaffold575        | 110759                         | (C/T)       |
| 15871       | CakSNP15871    | <i>Kabuli</i>    | Ca_Kabuli_Scaffold575        | 110753                         | (G/A)       |
| 15872       | CakSNP15872    | <i>Kabuli</i>    | Ca_Kabuli_Scaffold575        | 117287                         | (T/G)       |
| 15873       | CakSNP15873    | <i>Kabuli</i>    | Ca_Kabuli_Scaffold5792       | 65166                          | (A/C)       |
| 15874       | CakSNP15874    | <i>Kabuli</i>    | Ca_Kabuli_Scaffold5792       | 86779                          | (C/A)       |
| 15875       | CakSNP15875    | <i>Kabuli</i>    | Ca_Kabuli_Scaffold5792       | 86716                          | (T/C)       |
| 15876       | CakSNP15876    | <i>Kabuli</i>    | Ca_Kabuli_Scaffold584        | 53203                          | (G/T)       |
| 15877       | CakSNP15877    | <i>Kabuli</i>    | Ca_Kabuli_Scaffold589        | 72891                          | (T/G)       |
| 15878       | CakSNP15878    | <i>Kabuli</i>    | Ca_Kabuli_Scaffold590        | 88429                          | (A/T)       |
| 15879       | CakSNP15879    | <i>Kabuli</i>    | Ca_Kabuli_Scaffold590        | 88420                          | (T/C)       |
| 15880       | CakSNP15880    | <i>Kabuli</i>    | Ca_Kabuli_Scaffold598        | 300825                         | (A/C)       |
| 15881       | CakSNP15881    | <i>Kabuli</i>    | Ca_Kabuli_Scaffold598        | 300940                         | (C/T)       |
| 15882       | CakSNP15882    | <i>Kabuli</i>    | Ca_Kabuli_Scaffold598        | 404254                         | (G/C)       |
| 15883       | CakSNP15883    | <i>Kabuli</i>    | Ca_Kabuli_Scaffold598        | 404275                         | (G/T)       |

| <b>S.N.</b> | <b>SNP IDs</b> | <b>Cultivars</b> | <b>Chromosomes/scaffolds</b> | <b>Physical positions (bp)</b> | <b>SNPs</b> |
|-------------|----------------|------------------|------------------------------|--------------------------------|-------------|
| 15884       | CakSNP15884    | <i>Kabuli</i>    | Ca_Kabuli_Scaffold599        | 349605                         | (T/G)       |
| 15885       | CakSNP15885    | <i>Kabuli</i>    | Ca_Kabuli_Scaffold5997       | 742                            | (G/C)       |
| 15886       | CakSNP15886    | <i>Kabuli</i>    | Ca_Kabuli_Scaffold5997       | 679                            | (C/T)       |
| 15887       | CakSNP15887    | <i>Kabuli</i>    | Ca_Kabuli_Scaffold601        | 55483                          | (A/G)       |
| 15888       | CakSNP15888    | <i>Kabuli</i>    | Ca_Kabuli_Scaffold601        | 71998                          | (T/A)       |
| 15889       | CakSNP15889    | <i>Kabuli</i>    | Ca_Kabuli_Scaffold605        | 23769                          | (A/C)       |
| 15890       | CakSNP15890    | <i>Kabuli</i>    | Ca_Kabuli_Scaffold605        | 23773                          | (T/C)       |
| 15891       | CakSNP15891    | <i>Kabuli</i>    | Ca_Kabuli_Scaffold605        | 23774                          | (A/G)       |
| 15892       | CakSNP15892    | <i>Kabuli</i>    | Ca_Kabuli_Scaffold605        | 23775                          | (A/G)       |
| 15893       | CakSNP15893    | <i>Kabuli</i>    | Ca_Kabuli_Scaffold605        | 23793                          | (A/G)       |
| 15894       | CakSNP15894    | <i>Kabuli</i>    | Ca_Kabuli_Scaffold605        | 23795                          | (T/A)       |
| 15895       | CakSNP15895    | <i>Kabuli</i>    | Ca_Kabuli_Scaffold605        | 23803                          | (A/G)       |
| 15896       | CakSNP15896    | <i>Kabuli</i>    | Ca_Kabuli_Scaffold605        | 23808                          | (C/G)       |
| 15897       | CakSNP15897    | <i>Kabuli</i>    | Ca_Kabuli_Scaffold605        | 23811                          | (G/A)       |
| 15898       | CakSNP15898    | <i>Kabuli</i>    | Ca_Kabuli_Scaffold605        | 23816                          | (T/A)       |
| 15899       | CakSNP15899    | <i>Kabuli</i>    | Ca_Kabuli_Scaffold605        | 84761                          | (A/C)       |
| 15900       | CakSNP15900    | <i>Kabuli</i>    | Ca_Kabuli_Scaffold605        | 84765                          | (T/C)       |
| 15901       | CakSNP15901    | <i>Kabuli</i>    | Ca_Kabuli_Scaffold605        | 84766                          | (A/G)       |
| 15902       | CakSNP15902    | <i>Kabuli</i>    | Ca_Kabuli_Scaffold605        | 84767                          | (A/G)       |
| 15903       | CakSNP15903    | <i>Kabuli</i>    | Ca_Kabuli_Scaffold605        | 84785                          | (A/G)       |
| 15904       | CakSNP15904    | <i>Kabuli</i>    | Ca_Kabuli_Scaffold605        | 84787                          | (T/A)       |
| 15905       | CakSNP15905    | <i>Kabuli</i>    | Ca_Kabuli_Scaffold605        | 84795                          | (A/G)       |
| 15906       | CakSNP15906    | <i>Kabuli</i>    | Ca_Kabuli_Scaffold605        | 84800                          | (C/G)       |
| 15907       | CakSNP15907    | <i>Kabuli</i>    | Ca_Kabuli_Scaffold605        | 84803                          | (G/A)       |
| 15908       | CakSNP15908    | <i>Kabuli</i>    | Ca_Kabuli_Scaffold605        | 84807                          | (A/G)       |
| 15909       | CakSNP15909    | <i>Kabuli</i>    | Ca_Kabuli_Scaffold62         | 46079                          | (C/T)       |
| 15910       | CakSNP15910    | <i>Kabuli</i>    | Ca_Kabuli_Scaffold62         | 46085                          | (C/T)       |
| 15911       | CakSNP15911    | <i>Kabuli</i>    | Ca_Kabuli_Scaffold62         | 46087                          | (G/A)       |
| 15912       | CakSNP15912    | <i>Kabuli</i>    | Ca_Kabuli_Scaffold62         | 46088                          | (C/T)       |
| 15913       | CakSNP15913    | <i>Kabuli</i>    | Ca_Kabuli_Scaffold624        | 254901                         | (C/T)       |
| 15914       | CakSNP15914    | <i>Kabuli</i>    | Ca_Kabuli_Scaffold624        | 254950                         | (G/A)       |
| 15915       | CakSNP15915    | <i>Kabuli</i>    | Ca_Kabuli_Scaffold624        | 254959                         | (T/C)       |
| 15916       | CakSNP15916    | <i>Kabuli</i>    | Ca_Kabuli_Scaffold624        | 254971                         | (G/A)       |
| 15917       | CakSNP15917    | <i>Kabuli</i>    | Ca_Kabuli_Scaffold624        | 254992                         | (C/T)       |
| 15918       | CakSNP15918    | <i>Kabuli</i>    | Ca_Kabuli_Scaffold624        | 254942                         | (A/T)       |
| 15919       | CakSNP15919    | <i>Kabuli</i>    | Ca_Kabuli_Scaffold6339       | 190                            | (T/G)       |
| 15920       | CakSNP15920    | <i>Kabuli</i>    | Ca_Kabuli_Scaffold6367       | 6825                           | (G/T)       |
| 15921       | CakSNP15921    | <i>Kabuli</i>    | Ca_Kabuli_Scaffold6367       | 10856                          | (T/G)       |

| <b>S.N.</b> | <b>SNP IDs</b> | <b>Cultivars</b> | <b>Chromosomes/scaffolds</b> | <b>Physical positions (bp)</b> | <b>SNPs</b> |
|-------------|----------------|------------------|------------------------------|--------------------------------|-------------|
| 15922       | CakSNP15922    | <i>Kabuli</i>    | Ca_Kabuli_Scaffold6367       | 10842                          | (T/A)       |
| 15923       | CakSNP15923    | <i>Kabuli</i>    | Ca_Kabuli_Scaffold6367       | 13651                          | (G/A)       |
| 15924       | CakSNP15924    | <i>Kabuli</i>    | Ca_Kabuli_Scaffold6367       | 23667                          | (G/A)       |
| 15925       | CakSNP15925    | <i>Kabuli</i>    | Ca_Kabuli_Scaffold6367       | 25674                          | (T/C)       |
| 15926       | CakSNP15926    | <i>Kabuli</i>    | Ca_Kabuli_Scaffold637        | 107671                         | (G/C)       |
| 15927       | CakSNP15927    | <i>Kabuli</i>    | Ca_Kabuli_Scaffold637        | 107661                         | (A/C)       |
| 15928       | CakSNP15928    | <i>Kabuli</i>    | Ca_Kabuli_Scaffold637        | 107636                         | (T/C)       |
| 15929       | CakSNP15929    | <i>Kabuli</i>    | Ca_Kabuli_Scaffold637        | 107613                         | (C/G)       |
| 15930       | CakSNP15930    | <i>Kabuli</i>    | Ca_Kabuli_Scaffold6403       | 1553                           | (T/A)       |
| 15931       | CakSNP15931    | <i>Kabuli</i>    | Ca_Kabuli_Scaffold642        | 28715                          | (A/T)       |
| 15932       | CakSNP15932    | <i>Kabuli</i>    | Ca_Kabuli_Scaffold642        | 615176                         | (T/C)       |
| 15933       | CakSNP15933    | <i>Kabuli</i>    | Ca_Kabuli_Scaffold645        | 91908                          | (C/T)       |
| 15934       | CakSNP15934    | <i>Kabuli</i>    | Ca_Kabuli_Scaffold653        | 145231                         | (A/G)       |
| 15935       | CakSNP15935    | <i>Kabuli</i>    | Ca_Kabuli_Scaffold653        | 183054                         | (T/C)       |
| 15936       | CakSNP15936    | <i>Kabuli</i>    | Ca_Kabuli_Scaffold653        | 183063                         | (G/A)       |
| 15937       | CakSNP15937    | <i>Kabuli</i>    | Ca_Kabuli_Scaffold653        | 183069                         | (C/A)       |
| 15938       | CakSNP15938    | <i>Kabuli</i>    | Ca_Kabuli_Scaffold653        | 183074                         | (C/G)       |
| 15939       | CakSNP15939    | <i>Kabuli</i>    | Ca_Kabuli_Scaffold653        | 183078                         | (T/G)       |
| 15940       | CakSNP15940    | <i>Kabuli</i>    | Ca_Kabuli_Scaffold653        | 183091                         | (T/C)       |
| 15941       | CakSNP15941    | <i>Kabuli</i>    | Ca_Kabuli_Scaffold653        | 183143                         | (T/A)       |
| 15942       | CakSNP15942    | <i>Kabuli</i>    | Ca_Kabuli_Scaffold653        | 183135                         | (T/C)       |
| 15943       | CakSNP15943    | <i>Kabuli</i>    | Ca_Kabuli_Scaffold653        | 183112                         | (T/C)       |
| 15944       | CakSNP15944    | <i>Kabuli</i>    | Ca_Kabuli_Scaffold653        | 189129                         | (C/T)       |
| 15945       | CakSNP15945    | <i>Kabuli</i>    | Ca_Kabuli_Scaffold653        | 197878                         | (A/T)       |
| 15946       | CakSNP15946    | <i>Kabuli</i>    | Ca_Kabuli_Scaffold661        | 180364                         | (G/T)       |
| 15947       | CakSNP15947    | <i>Kabuli</i>    | Ca_Kabuli_Scaffold661        | 180362                         | (A/C)       |
| 15948       | CakSNP15948    | <i>Kabuli</i>    | Ca_Kabuli_Scaffold661        | 180348                         | (C/T)       |
| 15949       | CakSNP15949    | <i>Kabuli</i>    | Ca_Kabuli_Scaffold661        | 180302                         | (G/T)       |
| 15950       | CakSNP15950    | <i>Kabuli</i>    | Ca_Kabuli_Scaffold661        | 311222                         | (G/T)       |
| 15951       | CakSNP15951    | <i>Kabuli</i>    | Ca_Kabuli_Scaffold661        | 311182                         | (C/T)       |
| 15952       | CakSNP15952    | <i>Kabuli</i>    | Ca_Kabuli_Scaffold663        | 16068                          | (G/A)       |
| 15953       | CakSNP15953    | <i>Kabuli</i>    | Ca_Kabuli_Scaffold663        | 16042                          | (C/A)       |
| 15954       | CakSNP15954    | <i>Kabuli</i>    | Ca_Kabuli_Scaffold663        | 16029                          | (G/A)       |
| 15955       | CakSNP15955    | <i>Kabuli</i>    | Ca_Kabuli_Scaffold663        | 16056                          | (C/T)       |
| 15956       | CakSNP15956    | <i>Kabuli</i>    | Ca_Kabuli_Scaffold663        | 16059                          | (G/A)       |
| 15957       | CakSNP15957    | <i>Kabuli</i>    | Ca_Kabuli_Scaffold663        | 16061                          | (A/G)       |
| 15958       | CakSNP15958    | <i>Kabuli</i>    | Ca_Kabuli_Scaffold663        | 156613                         | (G/C)       |
| 15959       | CakSNP15959    | <i>Kabuli</i>    | Ca_Kabuli_Scaffold674        | 91979                          | (T/A)       |

| <b>S.N.</b> | <b>SNP IDs</b> | <b>Cultivars</b> | <b>Chromosomes/scaffolds</b> | <b>Physical positions (bp)</b> | <b>SNPs</b> |
|-------------|----------------|------------------|------------------------------|--------------------------------|-------------|
| 15960       | CakSNP15960    | <i>Kabuli</i>    | Ca_Kabuli_Scaffold674        | 360388                         | (C/T)       |
| 15961       | CakSNP15961    | <i>Kabuli</i>    | Ca_Kabuli_Scaffold674        | 360401                         | (A/G)       |
| 15962       | CakSNP15962    | <i>Kabuli</i>    | Ca_Kabuli_Scaffold674        | 360421                         | (G/A)       |
| 15963       | CakSNP15963    | <i>Kabuli</i>    | Ca_Kabuli_Scaffold674        | 360406                         | (C/T)       |
| 15964       | CakSNP15964    | <i>Kabuli</i>    | Ca_Kabuli_Scaffold674        | 360349                         | (G/A)       |
| 15965       | CakSNP15965    | <i>Kabuli</i>    | Ca_Kabuli_Scaffold674        | 360464                         | (G/A)       |
| 15966       | CakSNP15966    | <i>Kabuli</i>    | Ca_Kabuli_Scaffold674        | 360457                         | (G/C)       |
| 15967       | CakSNP15967    | <i>Kabuli</i>    | Ca_Kabuli_Scaffold674        | 360411                         | (G/A)       |
| 15968       | CakSNP15968    | <i>Kabuli</i>    | Ca_Kabuli_Scaffold674        | 360408                         | (G/T)       |
| 15969       | CakSNP15969    | <i>Kabuli</i>    | Ca_Kabuli_Scaffold674        | 608623                         | (T/G)       |
| 15970       | CakSNP15970    | <i>Kabuli</i>    | Ca_Kabuli_Scaffold674        | 652382                         | (G/A)       |
| 15971       | CakSNP15971    | <i>Kabuli</i>    | Ca_Kabuli_Scaffold674        | 652373                         | (A/G)       |
| 15972       | CakSNP15972    | <i>Kabuli</i>    | Ca_Kabuli_Scaffold674        | 826136                         | (T/C)       |
| 15973       | CakSNP15973    | <i>Kabuli</i>    | Ca_Kabuli_Scaffold681        | 18376                          | (C/G)       |
| 15974       | CakSNP15974    | <i>Kabuli</i>    | Ca_Kabuli_Scaffold682        | 157238                         | (G/C)       |
| 15975       | CakSNP15975    | <i>Kabuli</i>    | Ca_Kabuli_Scaffold682        | 578200                         | (T/G)       |
| 15976       | CakSNP15976    | <i>Kabuli</i>    | Ca_Kabuli_Scaffold684        | 78894                          | (G/A)       |
| 15977       | CakSNP15977    | <i>Kabuli</i>    | Ca_Kabuli_Scaffold684        | 78883                          | (T/G)       |
| 15978       | CakSNP15978    | <i>Kabuli</i>    | Ca_Kabuli_Scaffold684        | 78871                          | (C/G)       |
| 15979       | CakSNP15979    | <i>Kabuli</i>    | Ca_Kabuli_Scaffold684        | 78842                          | (G/A)       |
| 15980       | CakSNP15980    | <i>Kabuli</i>    | Ca_Kabuli_Scaffold684        | 78844                          | (A/G)       |
| 15981       | CakSNP15981    | <i>Kabuli</i>    | Ca_Kabuli_Scaffold684        | 78864                          | (C/T)       |
| 15982       | CakSNP15982    | <i>Kabuli</i>    | Ca_Kabuli_Scaffold684        | 78893                          | (C/T)       |
| 15983       | CakSNP15983    | <i>Kabuli</i>    | Ca_Kabuli_Scaffold686        | 206111                         | (G/A)       |
| 15984       | CakSNP15984    | <i>Kabuli</i>    | Ca_Kabuli_Scaffold686        | 206044                         | (T/C)       |
| 15985       | CakSNP15985    | <i>Kabuli</i>    | Ca_Kabuli_Scaffold686        | 206042                         | (A/G)       |
| 15986       | CakSNP15986    | <i>Kabuli</i>    | Ca_Kabuli_Scaffold702        | 247644                         | (G/C)       |
| 15987       | CakSNP15987    | <i>Kabuli</i>    | Ca_Kabuli_Scaffold711        | 153694                         | (C/T)       |
| 15988       | CakSNP15988    | <i>Kabuli</i>    | Ca_Kabuli_Scaffold711        | 153680                         | (C/A)       |
| 15989       | CakSNP15989    | <i>Kabuli</i>    | Ca_Kabuli_Scaffold711        | 153667                         | (G/A)       |
| 15990       | CakSNP15990    | <i>Kabuli</i>    | Ca_Kabuli_Scaffold711        | 153697                         | (G/A)       |
| 15991       | CakSNP15991    | <i>Kabuli</i>    | Ca_Kabuli_Scaffold711        | 153699                         | (A/G)       |
| 15992       | CakSNP15992    | <i>Kabuli</i>    | Ca_Kabuli_Scaffold711        | 153706                         | (G/A)       |
| 15993       | CakSNP15993    | <i>Kabuli</i>    | Ca_Kabuli_Scaffold7127       | 1878                           | (C/T)       |
| 15994       | CakSNP15994    | <i>Kabuli</i>    | Ca_Kabuli_Scaffold7144       | 234                            | (A/T)       |
| 15995       | CakSNP15995    | <i>Kabuli</i>    | Ca_Kabuli_Scaffold716        | 128208                         | (G/T)       |
| 15996       | CakSNP15996    | <i>Kabuli</i>    | Ca_Kabuli_Scaffold716        | 212326                         | (G/A)       |
| 15997       | CakSNP15997    | <i>Kabuli</i>    | Ca_Kabuli_Scaffold716        | 212374                         | (G/A)       |

| <b>S.N.</b> | <b>SNP IDs</b> | <b>Cultivars</b> | <b>Chromosomes/scaffolds</b> | <b>Physical positions (bp)</b> | <b>SNPs</b> |
|-------------|----------------|------------------|------------------------------|--------------------------------|-------------|
| 15998       | CakSNP15998    | <i>Kabuli</i>    | Ca_Kabuli_Scaffold716        | 269220                         | (T/C)       |
| 15999       | CakSNP15999    | <i>Kabuli</i>    | Ca_Kabuli_Scaffold716        | 269230                         | (A/C)       |
| 16000       | CakSNP16000    | <i>Kabuli</i>    | Ca_Kabuli_Scaffold716        | 269242                         | (A/G)       |
| 16001       | CakSNP16001    | <i>Kabuli</i>    | Ca_Kabuli_Scaffold716        | 269266                         | (G/T)       |
| 16002       | CakSNP16002    | <i>Kabuli</i>    | Ca_Kabuli_Scaffold716        | 269271                         | (G/A)       |
| 16003       | CakSNP16003    | <i>Kabuli</i>    | Ca_Kabuli_Scaffold716        | 269281                         | (T/G)       |
| 16004       | CakSNP16004    | <i>Kabuli</i>    | Ca_Kabuli_Scaffold716        | 269287                         | (G/A)       |
| 16005       | CakSNP16005    | <i>Kabuli</i>    | Ca_Kabuli_Scaffold716        | 269335                         | (G/A)       |
| 16006       | CakSNP16006    | <i>Kabuli</i>    | Ca_Kabuli_Scaffold716        | 269332                         | (C/T)       |
| 16007       | CakSNP16007    | <i>Kabuli</i>    | Ca_Kabuli_Scaffold716        | 269314                         | (G/A)       |
| 16008       | CakSNP16008    | <i>Kabuli</i>    | Ca_Kabuli_Scaffold716        | 269299                         | (T/C)       |
| 16009       | CakSNP16009    | <i>Kabuli</i>    | Ca_Kabuli_Scaffold719        | 11850                          | (C/T)       |
| 16010       | CakSNP16010    | <i>Kabuli</i>    | Ca_Kabuli_Scaffold720        | 60880                          | (G/A)       |
| 16011       | CakSNP16011    | <i>Kabuli</i>    | Ca_Kabuli_Scaffold720        | 370624                         | (T/G)       |
| 16012       | CakSNP16012    | <i>Kabuli</i>    | Ca_Kabuli_Scaffold720        | 370639                         | (T/A)       |
| 16013       | CakSNP16013    | <i>Kabuli</i>    | Ca_Kabuli_Scaffold720        | 370725                         | (G/A)       |
| 16014       | CakSNP16014    | <i>Kabuli</i>    | Ca_Kabuli_Scaffold724        | 25019                          | (G/A)       |
| 16015       | CakSNP16015    | <i>Kabuli</i>    | Ca_Kabuli_Scaffold724        | 25722                          | (G/C)       |
| 16016       | CakSNP16016    | <i>Kabuli</i>    | Ca_Kabuli_Scaffold731        | 315093                         | (G/A)       |
| 16017       | CakSNP16017    | <i>Kabuli</i>    | Ca_Kabuli_Scaffold731        | 315114                         | (C/T)       |
| 16018       | CakSNP16018    | <i>Kabuli</i>    | Ca_Kabuli_Scaffold731        | 315135                         | (G/T)       |
| 16019       | CakSNP16019    | <i>Kabuli</i>    | Ca_Kabuli_Scaffold731        | 315138                         | (C/T)       |
| 16020       | CakSNP16020    | <i>Kabuli</i>    | Ca_Kabuli_Scaffold731        | 315141                         | (G/A)       |
| 16021       | CakSNP16021    | <i>Kabuli</i>    | Ca_Kabuli_Scaffold731        | 332497                         | (G/A)       |
| 16022       | CakSNP16022    | <i>Kabuli</i>    | Ca_Kabuli_Scaffold731        | 332468                         | (G/T)       |
| 16023       | CakSNP16023    | <i>Kabuli</i>    | Ca_Kabuli_Scaffold731        | 332467                         | (G/C)       |
| 16024       | CakSNP16024    | <i>Kabuli</i>    | Ca_Kabuli_Scaffold731        | 332465                         | (T/A)       |
| 16025       | CakSNP16025    | <i>Kabuli</i>    | Ca_Kabuli_Scaffold731        | 332464                         | (G/T)       |
| 16026       | CakSNP16026    | <i>Kabuli</i>    | Ca_Kabuli_Scaffold731        | 332458                         | (A/T)       |
| 16027       | CakSNP16027    | <i>Kabuli</i>    | Ca_Kabuli_Scaffold731        | 332528                         | (G/C)       |
| 16028       | CakSNP16028    | <i>Kabuli</i>    | Ca_Kabuli_Scaffold731        | 357674                         | (G/A)       |
| 16029       | CakSNP16029    | <i>Kabuli</i>    | Ca_Kabuli_Scaffold731        | 357645                         | (G/T)       |
| 16030       | CakSNP16030    | <i>Kabuli</i>    | Ca_Kabuli_Scaffold731        | 357644                         | (G/C)       |
| 16031       | CakSNP16031    | <i>Kabuli</i>    | Ca_Kabuli_Scaffold731        | 357642                         | (T/A)       |
| 16032       | CakSNP16032    | <i>Kabuli</i>    | Ca_Kabuli_Scaffold731        | 357641                         | (G/T)       |
| 16033       | CakSNP16033    | <i>Kabuli</i>    | Ca_Kabuli_Scaffold731        | 357635                         | (A/T)       |
| 16034       | CakSNP16034    | <i>Kabuli</i>    | Ca_Kabuli_Scaffold731        | 357715                         | (A/T)       |
| 16035       | CakSNP16035    | <i>Kabuli</i>    | Ca_Kabuli_Scaffold731        | 362123                         | (G/A)       |



| <b>S.N.</b> | <b>SNP IDs</b> | <b>Cultivars</b> | <b>Chromosomes/scaffolds</b> | <b>Physical positions (bp)</b> | <b>SNPs</b> |
|-------------|----------------|------------------|------------------------------|--------------------------------|-------------|
| 16036       | CakSNP16036    | <i>Kabuli</i>    | Ca_Kabuli_Scaffold731        | 362118                         | (C/A)       |
| 16037       | CakSNP16037    | <i>Kabuli</i>    | Ca_Kabuli_Scaffold731        | 362114                         | (A/C)       |
| 16038       | CakSNP16038    | <i>Kabuli</i>    | Ca_Kabuli_Scaffold731        | 362548                         | (T/A)       |
| 16039       | CakSNP16039    | <i>Kabuli</i>    | Ca_Kabuli_Scaffold731        | 362553                         | (C/T)       |
| 16040       | CakSNP16040    | <i>Kabuli</i>    | Ca_Kabuli_Scaffold731        | 362554                         | (T/A)       |
| 16041       | CakSNP16041    | <i>Kabuli</i>    | Ca_Kabuli_Scaffold731        | 362555                         | (T/G)       |
| 16042       | CakSNP16042    | <i>Kabuli</i>    | Ca_Kabuli_Scaffold731        | 362556                         | (C/A)       |
| 16043       | CakSNP16043    | <i>Kabuli</i>    | Ca_Kabuli_Scaffold731        | 362574                         | (T/C)       |
| 16044       | CakSNP16044    | <i>Kabuli</i>    | Ca_Kabuli_Scaffold731        | 362581                         | (A/G)       |
| 16045       | CakSNP16045    | <i>Kabuli</i>    | Ca_Kabuli_Scaffold731        | 362582                         | (T/C)       |
| 16046       | CakSNP16046    | <i>Kabuli</i>    | Ca_Kabuli_Scaffold731        | 362594                         | (G/T)       |
| 16047       | CakSNP16047    | <i>Kabuli</i>    | Ca_Kabuli_Scaffold731        | 362610                         | (C/T)       |
| 16048       | CakSNP16048    | <i>Kabuli</i>    | Ca_Kabuli_Scaffold731        | 372255                         | (G/A)       |
| 16049       | CakSNP16049    | <i>Kabuli</i>    | Ca_Kabuli_Scaffold731        | 372253                         | (G/T)       |
| 16050       | CakSNP16050    | <i>Kabuli</i>    | Ca_Kabuli_Scaffold731        | 372250                         | (G/A)       |
| 16051       | CakSNP16051    | <i>Kabuli</i>    | Ca_Kabuli_Scaffold731        | 372244                         | (C/T)       |
| 16052       | CakSNP16052    | <i>Kabuli</i>    | Ca_Kabuli_Scaffold731        | 372243                         | (A/T)       |
| 16053       | CakSNP16053    | <i>Kabuli</i>    | Ca_Kabuli_Scaffold731        | 372215                         | (A/G)       |
| 16054       | CakSNP16054    | <i>Kabuli</i>    | Ca_Kabuli_Scaffold731        | 372209                         | (G/C)       |
| 16055       | CakSNP16055    | <i>Kabuli</i>    | Ca_Kabuli_Scaffold731        | 372183                         | (C/T)       |
| 16056       | CakSNP16056    | <i>Kabuli</i>    | Ca_Kabuli_Scaffold731        | 372959                         | (A/C)       |
| 16057       | CakSNP16057    | <i>Kabuli</i>    | Ca_Kabuli_Scaffold7355       | 1606                           | (C/G)       |
| 16058       | CakSNP16058    | <i>Kabuli</i>    | Ca_Kabuli_Scaffold7355       | 1690                           | (T/C)       |
| 16059       | CakSNP16059    | <i>Kabuli</i>    | Ca_Kabuli_Scaffold7355       | 3608                           | (A/G)       |
| 16060       | CakSNP16060    | <i>Kabuli</i>    | Ca_Kabuli_Scaffold7355       | 3602                           | (T/C)       |
| 16061       | CakSNP16061    | <i>Kabuli</i>    | Ca_Kabuli_Scaffold7355       | 3578                           | (C/T)       |
| 16062       | CakSNP16062    | <i>Kabuli</i>    | Ca_Kabuli_Scaffold7355       | 3572                           | (A/G)       |
| 16063       | CakSNP16063    | <i>Kabuli</i>    | Ca_Kabuli_Scaffold7355       | 3566                           | (C/T)       |
| 16064       | CakSNP16064    | <i>Kabuli</i>    | Ca_Kabuli_Scaffold752        | 382375                         | (G/A)       |
| 16065       | CakSNP16065    | <i>Kabuli</i>    | Ca_Kabuli_Scaffold752        | 497452                         | (T/A)       |
| 16066       | CakSNP16066    | <i>Kabuli</i>    | Ca_Kabuli_Scaffold752        | 497454                         | (A/G)       |
| 16067       | CakSNP16067    | <i>Kabuli</i>    | Ca_Kabuli_Scaffold753        | 8312                           | (A/G)       |
| 16068       | CakSNP16068    | <i>Kabuli</i>    | Ca_Kabuli_Scaffold758        | 16480                          | (G/T)       |
| 16069       | CakSNP16069    | <i>Kabuli</i>    | Ca_Kabuli_Scaffold7650       | 2686                           | (C/T)       |
| 16070       | CakSNP16070    | <i>Kabuli</i>    | Ca_Kabuli_Scaffold7715       | 3434                           | (A/T)       |
| 16071       | CakSNP16071    | <i>Kabuli</i>    | Ca_Kabuli_Scaffold772        | 53192                          | (C/T)       |
| 16072       | CakSNP16072    | <i>Kabuli</i>    | Ca_Kabuli_Scaffold772        | 53196                          | (C/T)       |
| 16073       | CakSNP16073    | <i>Kabuli</i>    | Ca_Kabuli_Scaffold775        | 89238                          | (T/C)       |

| <b>S.N.</b> | <b>SNP IDs</b> | <b>Cultivars</b> | <b>Chromosomes/scaffolds</b> | <b>Physical positions (bp)</b> | <b>SNPs</b> |
|-------------|----------------|------------------|------------------------------|--------------------------------|-------------|
| 16074       | CakSNP16074    | <i>Kabuli</i>    | Ca_Kabuli_Scaffold775        | 89239                          | (C/T)       |
| 16075       | CakSNP16075    | <i>Kabuli</i>    | Ca_Kabuli_Scaffold775        | 279828                         | (A/G)       |
| 16076       | CakSNP16076    | <i>Kabuli</i>    | Ca_Kabuli_Scaffold775        | 356107                         | (C/A)       |
| 16077       | CakSNP16077    | <i>Kabuli</i>    | Ca_Kabuli_Scaffold775        | 448604                         | (G/A)       |
| 16078       | CakSNP16078    | <i>Kabuli</i>    | Ca_Kabuli_Scaffold775        | 448743                         | (T/C)       |
| 16079       | CakSNP16079    | <i>Kabuli</i>    | Ca_Kabuli_Scaffold776        | 188906                         | (C/T)       |
| 16080       | CakSNP16080    | <i>Kabuli</i>    | Ca_Kabuli_Scaffold776        | 188895                         | (C/T)       |
| 16081       | CakSNP16081    | <i>Kabuli</i>    | Ca_Kabuli_Scaffold776        | 188888                         | (G/A)       |
| 16082       | CakSNP16082    | <i>Kabuli</i>    | Ca_Kabuli_Scaffold7765       | 503                            | (C/T)       |
| 16083       | CakSNP16083    | <i>Kabuli</i>    | Ca_Kabuli_Scaffold7765       | 536                            | (C/A)       |
| 16084       | CakSNP16084    | <i>Kabuli</i>    | Ca_Kabuli_Scaffold7765       | 549                            | (G/A)       |
| 16085       | CakSNP16085    | <i>Kabuli</i>    | Ca_Kabuli_Scaffold783        | 201617                         | (T/C)       |
| 16086       | CakSNP16086    | <i>Kabuli</i>    | Ca_Kabuli_Scaffold783        | 244209                         | (T/C)       |
| 16087       | CakSNP16087    | <i>Kabuli</i>    | Ca_Kabuli_Scaffold7842       | 727                            | (C/T)       |
| 16088       | CakSNP16088    | <i>Kabuli</i>    | Ca_Kabuli_Scaffold7842       | 1078                           | (G/A)       |
| 16089       | CakSNP16089    | <i>Kabuli</i>    | Ca_Kabuli_Scaffold7842       | 1075                           | (C/T)       |
| 16090       | CakSNP16090    | <i>Kabuli</i>    | Ca_Kabuli_Scaffold7842       | 1068                           | (C/A)       |
| 16091       | CakSNP16091    | <i>Kabuli</i>    | Ca_Kabuli_Scaffold7842       | 1042                           | (T/C)       |
| 16092       | CakSNP16092    | <i>Kabuli</i>    | Ca_Kabuli_Scaffold7842       | 1024                           | (T/G)       |
| 16093       | CakSNP16093    | <i>Kabuli</i>    | Ca_Kabuli_Scaffold787        | 4363                           | (A/G)       |
| 16094       | CakSNP16094    | <i>Kabuli</i>    | Ca_Kabuli_Scaffold794        | 50197                          | (T/G)       |
| 16095       | CakSNP16095    | <i>Kabuli</i>    | Ca_Kabuli_Scaffold794        | 50201                          | (T/G)       |
| 16096       | CakSNP16096    | <i>Kabuli</i>    | Ca_Kabuli_Scaffold794        | 50225                          | (C/G)       |
| 16097       | CakSNP16097    | <i>Kabuli</i>    | Ca_Kabuli_Scaffold794        | 50239                          | (G/A)       |
| 16098       | CakSNP16098    | <i>Kabuli</i>    | Ca_Kabuli_Scaffold794        | 50240                          | (C/A)       |
| 16099       | CakSNP16099    | <i>Kabuli</i>    | Ca_Kabuli_Scaffold794        | 50236                          | (A/G)       |
| 16100       | CakSNP16100    | <i>Kabuli</i>    | Ca_Kabuli_Scaffold799        | 3956                           | (G/A)       |
| 16101       | CakSNP16101    | <i>Kabuli</i>    | Ca_Kabuli_Scaffold799        | 3930                           | (A/G)       |
| 16102       | CakSNP16102    | <i>Kabuli</i>    | Ca_Kabuli_Scaffold799        | 3928                           | (C/T)       |
| 16103       | CakSNP16103    | <i>Kabuli</i>    | Ca_Kabuli_Scaffold801        | 67115                          | (C/T)       |
| 16104       | CakSNP16104    | <i>Kabuli</i>    | Ca_Kabuli_Scaffold806        | 129263                         | (A/G)       |
| 16105       | CakSNP16105    | <i>Kabuli</i>    | Ca_Kabuli_Scaffold806        | 129265                         | (G/T)       |
| 16106       | CakSNP16106    | <i>Kabuli</i>    | Ca_Kabuli_Scaffold809        | 48678                          | (T/C)       |
| 16107       | CakSNP16107    | <i>Kabuli</i>    | Ca_Kabuli_Scaffold809        | 48650                          | (C/A)       |
| 16108       | CakSNP16108    | <i>Kabuli</i>    | Ca_Kabuli_Scaffold809        | 53417                          | (C/G)       |
| 16109       | CakSNP16109    | <i>Kabuli</i>    | Ca_Kabuli_Scaffold809        | 53425                          | (T/C)       |
| 16110       | CakSNP16110    | <i>Kabuli</i>    | Ca_Kabuli_Scaffold809        | 53431                          | (G/A)       |
| 16111       | CakSNP16111    | <i>Kabuli</i>    | Ca_Kabuli_Scaffold809        | 53444                          | (G/A)       |

| <b>S.N.</b> | <b>SNP IDs</b> | <b>Cultivars</b> | <b>Chromosomes/scaffolds</b> | <b>Physical positions (bp)</b> | <b>SNPs</b> |
|-------------|----------------|------------------|------------------------------|--------------------------------|-------------|
| 16112       | CakSNP16112    | <i>Kabuli</i>    | Ca_Kabuli_Scaffold809        | 53474                          | (G/A)       |
| 16113       | CakSNP16113    | <i>Kabuli</i>    | Ca_Kabuli_Scaffold809        | 53464                          | (G/A)       |
| 16114       | CakSNP16114    | <i>Kabuli</i>    | Ca_Kabuli_Scaffold809        | 53470                          | (C/G)       |
| 16115       | CakSNP16115    | <i>Kabuli</i>    | Ca_Kabuli_Scaffold811        | 81373                          | (C/T)       |
| 16116       | CakSNP16116    | <i>Kabuli</i>    | Ca_Kabuli_Scaffold812        | 34686                          | (C/T)       |
| 16117       | CakSNP16117    | <i>Kabuli</i>    | Ca_Kabuli_Scaffold812        | 246208                         | (A/C)       |
| 16118       | CakSNP16118    | <i>Kabuli</i>    | Ca_Kabuli_Scaffold812        | 332746                         | (T/C)       |
| 16119       | CakSNP16119    | <i>Kabuli</i>    | Ca_Kabuli_Scaffold812        | 332758                         | (T/C)       |
| 16120       | CakSNP16120    | <i>Kabuli</i>    | Ca_Kabuli_Scaffold812        | 528815                         | (C/G)       |
| 16121       | CakSNP16121    | <i>Kabuli</i>    | Ca_Kabuli_Scaffold8226       | 21624                          | (G/A)       |
| 16122       | CakSNP16122    | <i>Kabuli</i>    | Ca_Kabuli_Scaffold8226       | 21592                          | (T/G)       |
| 16123       | CakSNP16123    | <i>Kabuli</i>    | Ca_Kabuli_Scaffold8226       | 21590                          | (T/C)       |
| 16124       | CakSNP16124    | <i>Kabuli</i>    | Ca_Kabuli_Scaffold8226       | 21572                          | (T/A)       |
| 16125       | CakSNP16125    | <i>Kabuli</i>    | Ca_Kabuli_Scaffold842        | 13898                          | (T/C)       |
| 16126       | CakSNP16126    | <i>Kabuli</i>    | Ca_Kabuli_Scaffold842        | 13905                          | (C/G)       |
| 16127       | CakSNP16127    | <i>Kabuli</i>    | Ca_Kabuli_Scaffold842        | 13928                          | (G/T)       |
| 16128       | CakSNP16128    | <i>Kabuli</i>    | Ca_Kabuli_Scaffold842        | 13946                          | (T/C)       |
| 16129       | CakSNP16129    | <i>Kabuli</i>    | Ca_Kabuli_Scaffold845        | 28172                          | (G/T)       |
| 16130       | CakSNP16130    | <i>Kabuli</i>    | Ca_Kabuli_Scaffold845        | 45557                          | (A/G)       |
| 16131       | CakSNP16131    | <i>Kabuli</i>    | Ca_Kabuli_Scaffold845        | 71041                          | (A/G)       |
| 16132       | CakSNP16132    | <i>Kabuli</i>    | Ca_Kabuli_Scaffold845        | 102612                         | (A/G)       |
| 16133       | CakSNP16133    | <i>Kabuli</i>    | Ca_Kabuli_Scaffold845        | 129326                         | (C/G)       |
| 16134       | CakSNP16134    | <i>Kabuli</i>    | Ca_Kabuli_Scaffold845        | 129370                         | (A/G)       |
| 16135       | CakSNP16135    | <i>Kabuli</i>    | Ca_Kabuli_Scaffold845        | 130569                         | (G/C)       |
| 16136       | CakSNP16136    | <i>Kabuli</i>    | Ca_Kabuli_Scaffold845        | 131911                         | (A/G)       |
| 16137       | CakSNP16137    | <i>Kabuli</i>    | Ca_Kabuli_Scaffold845        | 136796                         | (A/G)       |
| 16138       | CakSNP16138    | <i>Kabuli</i>    | Ca_Kabuli_Scaffold845        | 139268                         | (G/A)       |
| 16139       | CakSNP16139    | <i>Kabuli</i>    | Ca_Kabuli_Scaffold845        | 154556                         | (T/C)       |
| 16140       | CakSNP16140    | <i>Kabuli</i>    | Ca_Kabuli_Scaffold845        | 205934                         | (T/C)       |
| 16141       | CakSNP16141    | <i>Kabuli</i>    | Ca_Kabuli_Scaffold848        | 37282                          | (G/A)       |
| 16142       | CakSNP16142    | <i>Kabuli</i>    | Ca_Kabuli_Scaffold848        | 37309                          | (G/A)       |
| 16143       | CakSNP16143    | <i>Kabuli</i>    | Ca_Kabuli_Scaffold848        | 39934                          | (T/G)       |
| 16144       | CakSNP16144    | <i>Kabuli</i>    | Ca_Kabuli_Scaffold848        | 39968                          | (C/T)       |
| 16145       | CakSNP16145    | <i>Kabuli</i>    | Ca_Kabuli_Scaffold848        | 39984                          | (G/T)       |
| 16146       | CakSNP16146    | <i>Kabuli</i>    | Ca_Kabuli_Scaffold848        | 39985                          | (C/T)       |
| 16147       | CakSNP16147    | <i>Kabuli</i>    | Ca_Kabuli_Scaffold848        | 39990                          | (A/G)       |
| 16148       | CakSNP16148    | <i>Kabuli</i>    | Ca_Kabuli_Scaffold848        | 39994                          | (C/T)       |
| 16149       | CakSNP16149    | <i>Kabuli</i>    | Ca_Kabuli_Scaffold848        | 89976                          | (C/A)       |

| <b>S.N.</b> | <b>SNP IDs</b> | <b>Cultivars</b> | <b>Chromosomes/scaffolds</b> | <b>Physical positions (bp)</b> | <b>SNPs</b> |
|-------------|----------------|------------------|------------------------------|--------------------------------|-------------|
| 16150       | CakSNP16150    | <i>Kabuli</i>    | Ca_Kabuli_Scaffold848        | 114078                         | (T/C)       |
| 16151       | CakSNP16151    | <i>Kabuli</i>    | Ca_Kabuli_Scaffold848        | 158548                         | (T/C)       |
| 16152       | CakSNP16152    | <i>Kabuli</i>    | Ca_Kabuli_Scaffold848        | 158557                         | (G/A)       |
| 16153       | CakSNP16153    | <i>Kabuli</i>    | Ca_Kabuli_Scaffold848        | 158569                         | (C/T)       |
| 16154       | CakSNP16154    | <i>Kabuli</i>    | Ca_Kabuli_Scaffold848        | 158570                         | (A/G)       |
| 16155       | CakSNP16155    | <i>Kabuli</i>    | Ca_Kabuli_Scaffold848        | 158611                         | (C/T)       |
| 16156       | CakSNP16156    | <i>Kabuli</i>    | Ca_Kabuli_Scaffold848        | 158638                         | (G/A)       |
| 16157       | CakSNP16157    | <i>Kabuli</i>    | Ca_Kabuli_Scaffold848        | 158626                         | (G/T)       |
| 16158       | CakSNP16158    | <i>Kabuli</i>    | Ca_Kabuli_Scaffold848        | 158594                         | (A/G)       |
| 16159       | CakSNP16159    | <i>Kabuli</i>    | Ca_Kabuli_Scaffold857        | 5227                           | (G/A)       |
| 16160       | CakSNP16160    | <i>Kabuli</i>    | Ca_Kabuli_Scaffold8586       | 4415                           | (A/G)       |
| 16161       | CakSNP16161    | <i>Kabuli</i>    | Ca_Kabuli_Scaffold859        | 9382                           | (A/G)       |
| 16162       | CakSNP16162    | <i>Kabuli</i>    | Ca_Kabuli_Scaffold8641       | 502                            | (G/A)       |
| 16163       | CakSNP16163    | <i>Kabuli</i>    | Ca_Kabuli_Scaffold8641       | 472                            | (C/T)       |
| 16164       | CakSNP16164    | <i>Kabuli</i>    | Ca_Kabuli_Scaffold8641       | 466                            | (C/T)       |
| 16165       | CakSNP16165    | <i>Kabuli</i>    | Ca_Kabuli_Scaffold8641       | 460                            | (T/C)       |
| 16166       | CakSNP16166    | <i>Kabuli</i>    | Ca_Kabuli_Scaffold8646       | 2056                           | (A/T)       |
| 16167       | CakSNP16167    | <i>Kabuli</i>    | Ca_Kabuli_Scaffold8646       | 2073                           | (G/A)       |
| 16168       | CakSNP16168    | <i>Kabuli</i>    | Ca_Kabuli_Scaffold8648       | 3938                           | (C/T)       |
| 16169       | CakSNP16169    | <i>Kabuli</i>    | Ca_Kabuli_Scaffold8648       | 3977                           | (A/G)       |
| 16170       | CakSNP16170    | <i>Kabuli</i>    | Ca_Kabuli_Scaffold8648       | 4058                           | (C/A)       |
| 16171       | CakSNP16171    | <i>Kabuli</i>    | Ca_Kabuli_Scaffold8648       | 4050                           | (A/G)       |
| 16172       | CakSNP16172    | <i>Kabuli</i>    | Ca_Kabuli_Scaffold8648       | 4036                           | (A/C)       |
| 16173       | CakSNP16173    | <i>Kabuli</i>    | Ca_Kabuli_Scaffold8648       | 4013                           | (G/A)       |
| 16174       | CakSNP16174    | <i>Kabuli</i>    | Ca_Kabuli_Scaffold8648       | 3992                           | (G/A)       |
| 16175       | CakSNP16175    | <i>Kabuli</i>    | Ca_Kabuli_Scaffold866        | 27325                          | (C/T)       |
| 16176       | CakSNP16176    | <i>Kabuli</i>    | Ca_Kabuli_Scaffold866        | 27293                          | (T/G)       |
| 16177       | CakSNP16177    | <i>Kabuli</i>    | Ca_Kabuli_Scaffold866        | 27279                          | (C/T)       |
| 16178       | CakSNP16178    | <i>Kabuli</i>    | Ca_Kabuli_Scaffold87         | 182677                         | (C/G)       |
| 16179       | CakSNP16179    | <i>Kabuli</i>    | Ca_Kabuli_Scaffold87         | 182724                         | (G/A)       |
| 16180       | CakSNP16180    | <i>Kabuli</i>    | Ca_Kabuli_Scaffold87         | 182769                         | (G/C)       |
| 16181       | CakSNP16181    | <i>Kabuli</i>    | Ca_Kabuli_Scaffold87         | 182788                         | (A/C)       |
| 16182       | CakSNP16182    | <i>Kabuli</i>    | Ca_Kabuli_Scaffold873        | 265386                         | (C/T)       |
| 16183       | CakSNP16183    | <i>Kabuli</i>    | Ca_Kabuli_Scaffold873        | 265395                         | (C/A)       |
| 16184       | CakSNP16184    | <i>Kabuli</i>    | Ca_Kabuli_Scaffold873        | 265396                         | (C/T)       |
| 16185       | CakSNP16185    | <i>Kabuli</i>    | Ca_Kabuli_Scaffold873        | 265399                         | (C/A)       |
| 16186       | CakSNP16186    | <i>Kabuli</i>    | Ca_Kabuli_Scaffold873        | 265458                         | (C/T)       |
| 16187       | CakSNP16187    | <i>Kabuli</i>    | Ca_Kabuli_Scaffold873        | 265406                         | (T/C)       |

| <b>S.N.</b> | <b>SNP IDs</b> | <b>Cultivars</b> | <b>Chromosomes/scaffolds</b> | <b>Physical positions (bp)</b> | <b>SNPs</b> |
|-------------|----------------|------------------|------------------------------|--------------------------------|-------------|
| 16188       | CakSNP16188    | <i>Kabuli</i>    | Ca_Kabuli_Scaffold875        | 49179                          | (T/C)       |
| 16189       | CakSNP16189    | <i>Kabuli</i>    | Ca_Kabuli_Scaffold875        | 51703                          | (C/G)       |
| 16190       | CakSNP16190    | <i>Kabuli</i>    | Ca_Kabuli_Scaffold875        | 51702                          | (T/A)       |
| 16191       | CakSNP16191    | <i>Kabuli</i>    | Ca_Kabuli_Scaffold875        | 51701                          | (T/C)       |
| 16192       | CakSNP16192    | <i>Kabuli</i>    | Ca_Kabuli_Scaffold875        | 51714                          | (T/A)       |
| 16193       | CakSNP16193    | <i>Kabuli</i>    | Ca_Kabuli_Scaffold875        | 51704                          | (C/A)       |
| 16194       | CakSNP16194    | <i>Kabuli</i>    | Ca_Kabuli_Scaffold875        | 62738                          | (A/G)       |
| 16195       | CakSNP16195    | <i>Kabuli</i>    | Ca_Kabuli_Scaffold876        | 152311                         | (G/T)       |
| 16196       | CakSNP16196    | <i>Kabuli</i>    | Ca_Kabuli_Scaffold876        | 188605                         | (C/G)       |
| 16197       | CakSNP16197    | <i>Kabuli</i>    | Ca_Kabuli_Scaffold876        | 297059                         | (T/C)       |
| 16198       | CakSNP16198    | <i>Kabuli</i>    | Ca_Kabuli_Scaffold876        | 297024                         | (T/G)       |
| 16199       | CakSNP16199    | <i>Kabuli</i>    | Ca_Kabuli_Scaffold876        | 297023                         | (G/A)       |
| 16200       | CakSNP16200    | <i>Kabuli</i>    | Ca_Kabuli_Scaffold876        | 297022                         | (G/A)       |
| 16201       | CakSNP16201    | <i>Kabuli</i>    | Ca_Kabuli_Scaffold876        | 297003                         | (C/T)       |
| 16202       | CakSNP16202    | <i>Kabuli</i>    | Ca_Kabuli_Scaffold876        | 296995                         | (C/T)       |
| 16203       | CakSNP16203    | <i>Kabuli</i>    | Ca_Kabuli_Scaffold877        | 9813                           | (G/A)       |
| 16204       | CakSNP16204    | <i>Kabuli</i>    | Ca_Kabuli_Scaffold877        | 9851                           | (C/T)       |
| 16205       | CakSNP16205    | <i>Kabuli</i>    | Ca_Kabuli_Scaffold88         | 9982                           | (C/A)       |
| 16206       | CakSNP16206    | <i>Kabuli</i>    | Ca_Kabuli_Scaffold88         | 16398                          | (C/T)       |
| 16207       | CakSNP16207    | <i>Kabuli</i>    | Ca_Kabuli_Scaffold88         | 110743                         | (A/G)       |
| 16208       | CakSNP16208    | <i>Kabuli</i>    | Ca_Kabuli_Scaffold88         | 240551                         | (T/C)       |
| 16209       | CakSNP16209    | <i>Kabuli</i>    | Ca_Kabuli_Scaffold88         | 240550                         | (G/A)       |
| 16210       | CakSNP16210    | <i>Kabuli</i>    | Ca_Kabuli_Scaffold88         | 240525                         | (A/G)       |
| 16211       | CakSNP16211    | <i>Kabuli</i>    | Ca_Kabuli_Scaffold88         | 274006                         | (A/G)       |
| 16212       | CakSNP16212    | <i>Kabuli</i>    | Ca_Kabuli_Scaffold882        | 117376                         | (G/A)       |
| 16213       | CakSNP16213    | <i>Kabuli</i>    | Ca_Kabuli_Scaffold882        | 118266                         | (G/T)       |
| 16214       | CakSNP16214    | <i>Kabuli</i>    | Ca_Kabuli_Scaffold882        | 232549                         | (C/A)       |
| 16215       | CakSNP16215    | <i>Kabuli</i>    | Ca_Kabuli_Scaffold882        | 232570                         | (T/G)       |
| 16216       | CakSNP16216    | <i>Kabuli</i>    | Ca_Kabuli_Scaffold882        | 232605                         | (T/A)       |
| 16217       | CakSNP16217    | <i>Kabuli</i>    | Ca_Kabuli_Scaffold882        | 358449                         | (T/A)       |
| 16218       | CakSNP16218    | <i>Kabuli</i>    | Ca_Kabuli_Scaffold882        | 570871                         | (T/A)       |
| 16219       | CakSNP16219    | <i>Kabuli</i>    | Ca_Kabuli_Scaffold882        | 571210                         | (A/T)       |
| 16220       | CakSNP16220    | <i>Kabuli</i>    | Ca_Kabuli_Scaffold882        | 573367                         | (T/A)       |
| 16221       | CakSNP16221    | <i>Kabuli</i>    | Ca_Kabuli_Scaffold882        | 573706                         | (A/T)       |
| 16222       | CakSNP16222    | <i>Kabuli</i>    | Ca_Kabuli_Scaffold887_1      | 26025                          | (A/C)       |
| 16223       | CakSNP16223    | <i>Kabuli</i>    | Ca_Kabuli_Scaffold887_1      | 26134                          | (C/A)       |
| 16224       | CakSNP16224    | <i>Kabuli</i>    | Ca_Kabuli_Scaffold887_1      | 26121                          | (A/C)       |
| 16225       | CakSNP16225    | <i>Kabuli</i>    | Ca_Kabuli_Scaffold887_1      | 26108                          | (G/T)       |

| <b>S.N.</b> | <b>SNP IDs</b> | <b>Cultivars</b> | <b>Chromosomes/scaffolds</b> | <b>Physical positions (bp)</b> | <b>SNPs</b> |
|-------------|----------------|------------------|------------------------------|--------------------------------|-------------|
| 16226       | CakSNP16226    | <i>Kabuli</i>    | Ca_Kabuli_Scaffold887_1      | 139386                         | (T/C)       |
| 16227       | CakSNP16227    | <i>Kabuli</i>    | Ca_Kabuli_Scaffold887_1      | 139396                         | (G/C)       |
| 16228       | CakSNP16228    | <i>Kabuli</i>    | Ca_Kabuli_Scaffold887_1      | 139580                         | (G/T)       |
| 16229       | CakSNP16229    | <i>Kabuli</i>    | Ca_Kabuli_Scaffold887_1      | 144885                         | (T/C)       |
| 16230       | CakSNP16230    | <i>Kabuli</i>    | Ca_Kabuli_Scaffold887_1      | 260488                         | (A/C)       |
| 16231       | CakSNP16231    | <i>Kabuli</i>    | Ca_Kabuli_Scaffold892        | 24349                          | (T/C)       |
| 16232       | CakSNP16232    | <i>Kabuli</i>    | Ca_Kabuli_Scaffold892        | 24323                          | (A/G)       |
| 16233       | CakSNP16233    | <i>Kabuli</i>    | Ca_Kabuli_Scaffold892        | 24317                          | (G/T)       |
| 16234       | CakSNP16234    | <i>Kabuli</i>    | Ca_Kabuli_Scaffold892        | 24316                          | (T/A)       |
| 16235       | CakSNP16235    | <i>Kabuli</i>    | Ca_Kabuli_Scaffold892        | 35527                          | (T/C)       |
| 16236       | CakSNP16236    | <i>Kabuli</i>    | Ca_Kabuli_Scaffold892        | 35501                          | (A/G)       |
| 16237       | CakSNP16237    | <i>Kabuli</i>    | Ca_Kabuli_Scaffold892        | 35495                          | (G/T)       |
| 16238       | CakSNP16238    | <i>Kabuli</i>    | Ca_Kabuli_Scaffold892        | 35494                          | (T/A)       |
| 16239       | CakSNP16239    | <i>Kabuli</i>    | Ca_Kabuli_Scaffold892        | 35489                          | (A/G)       |
| 16240       | CakSNP16240    | <i>Kabuli</i>    | Ca_Kabuli_Scaffold892        | 35514                          | (G/T)       |
| 16241       | CakSNP16241    | <i>Kabuli</i>    | Ca_Kabuli_Scaffold895        | 18621                          | (C/A)       |
| 16242       | CakSNP16242    | <i>Kabuli</i>    | Ca_Kabuli_Scaffold895        | 18693                          | (G/C)       |
| 16243       | CakSNP16243    | <i>Kabuli</i>    | Ca_Kabuli_Scaffold895        | 20978                          | (T/C)       |
| 16244       | CakSNP16244    | <i>Kabuli</i>    | Ca_Kabuli_Scaffold895        | 158250                         | (A/G)       |
| 16245       | CakSNP16245    | <i>Kabuli</i>    | Ca_Kabuli_Scaffold901        | 91817                          | (C/T)       |
| 16246       | CakSNP16246    | <i>Kabuli</i>    | Ca_Kabuli_Scaffold901        | 91849                          | (T/C)       |
| 16247       | CakSNP16247    | <i>Kabuli</i>    | Ca_Kabuli_Scaffold908        | 15845                          | (C/A)       |
| 16248       | CakSNP16248    | <i>Kabuli</i>    | Ca_Kabuli_Scaffold908        | 15841                          | (G/A)       |
| 16249       | CakSNP16249    | <i>Kabuli</i>    | Ca_Kabuli_Scaffold908        | 15840                          | (G/A)       |
| 16250       | CakSNP16250    | <i>Kabuli</i>    | Ca_Kabuli_Scaffold908        | 15816                          | (C/T)       |
| 16251       | CakSNP16251    | <i>Kabuli</i>    | Ca_Kabuli_Scaffold908        | 15813                          | (G/T)       |
| 16252       | CakSNP16252    | <i>Kabuli</i>    | Ca_Kabuli_Scaffold908        | 15810                          | (A/G)       |
| 16253       | CakSNP16253    | <i>Kabuli</i>    | Ca_Kabuli_Scaffold908        | 15799                          | (C/T)       |
| 16254       | CakSNP16254    | <i>Kabuli</i>    | Ca_Kabuli_Scaffold908        | 15786                          | (G/A)       |
| 16255       | CakSNP16255    | <i>Kabuli</i>    | Ca_Kabuli_Scaffold908        | 15785                          | (G/A)       |
| 16256       | CakSNP16256    | <i>Kabuli</i>    | Ca_Kabuli_Scaffold908        | 15822                          | (C/T)       |
| 16257       | CakSNP16257    | <i>Kabuli</i>    | Ca_Kabuli_Scaffold908        | 15834                          | (C/A)       |
| 16258       | CakSNP16258    | <i>Kabuli</i>    | Ca_Kabuli_Scaffold913        | 14282                          | (A/C)       |
| 16259       | CakSNP16259    | <i>Kabuli</i>    | Ca_Kabuli_Scaffold913        | 332494                         | (G/C)       |
| 16260       | CakSNP16260    | <i>Kabuli</i>    | Ca_Kabuli_Scaffold913        | 403513                         | (G/A)       |
| 16261       | CakSNP16261    | <i>Kabuli</i>    | Ca_Kabuli_Scaffold913        | 403572                         | (C/G)       |
| 16262       | CakSNP16262    | <i>Kabuli</i>    | Ca_Kabuli_Scaffold913        | 403553                         | (T/C)       |
| 16263       | CakSNP16263    | <i>Kabuli</i>    | Ca_Kabuli_Scaffold913        | 403531                         | (A/C)       |

| <b>S.N.</b> | <b>SNP IDs</b> | <b>Cultivars</b> | <b>Chromosomes/scaffolds</b> | <b>Physical positions (bp)</b> | <b>SNPs</b> |
|-------------|----------------|------------------|------------------------------|--------------------------------|-------------|
| 16264       | CakSNP16264    | <i>Kabuli</i>    | Ca_Kabuli_Scaffold914        | 18826                          | (A/G)       |
| 16265       | CakSNP16265    | <i>Kabuli</i>    | Ca_Kabuli_Scaffold914        | 18810                          | (C/A)       |
| 16266       | CakSNP16266    | <i>Kabuli</i>    | Ca_Kabuli_Scaffold914        | 18809                          | (C/T)       |
| 16267       | CakSNP16267    | <i>Kabuli</i>    | Ca_Kabuli_Scaffold914        | 18750                          | (C/A)       |
| 16268       | CakSNP16268    | <i>Kabuli</i>    | Ca_Kabuli_Scaffold914        | 38792                          | (A/G)       |
| 16269       | CakSNP16269    | <i>Kabuli</i>    | Ca_Kabuli_Scaffold914        | 38776                          | (C/A)       |
| 16270       | CakSNP16270    | <i>Kabuli</i>    | Ca_Kabuli_Scaffold914        | 38775                          | (C/T)       |
| 16271       | CakSNP16271    | <i>Kabuli</i>    | Ca_Kabuli_Scaffold914        | 38716                          | (C/A)       |
| 16272       | CakSNP16272    | <i>Kabuli</i>    | Ca_Kabuli_Scaffold914        | 53125                          | (T/A)       |
| 16273       | CakSNP16273    | <i>Kabuli</i>    | Ca_Kabuli_Scaffold914        | 53132                          | (C/T)       |
| 16274       | CakSNP16274    | <i>Kabuli</i>    | Ca_Kabuli_Scaffold914        | 53270                          | (A/G)       |
| 16275       | CakSNP16275    | <i>Kabuli</i>    | Ca_Kabuli_Scaffold916        | 1036                           | (A/G)       |
| 16276       | CakSNP16276    | <i>Kabuli</i>    | Ca_Kabuli_Scaffold916        | 275497                         | (T/C)       |
| 16277       | CakSNP16277    | <i>Kabuli</i>    | Ca_Kabuli_Scaffold916        | 275510                         | (A/T)       |
| 16278       | CakSNP16278    | <i>Kabuli</i>    | Ca_Kabuli_Scaffold916        | 275512                         | (G/T)       |
| 16279       | CakSNP16279    | <i>Kabuli</i>    | Ca_Kabuli_Scaffold916        | 275519                         | (A/C)       |
| 16280       | CakSNP16280    | <i>Kabuli</i>    | Ca_Kabuli_Scaffold916        | 275493                         | (A/T)       |
| 16281       | CakSNP16281    | <i>Kabuli</i>    | Ca_Kabuli_Scaffold919        | 119274                         | (T/C)       |
| 16282       | CakSNP16282    | <i>Kabuli</i>    | Ca_Kabuli_Scaffold922        | 111921                         | (C/A)       |
| 16283       | CakSNP16283    | <i>Kabuli</i>    | Ca_Kabuli_Scaffold922        | 121629                         | (T/C)       |
| 16284       | CakSNP16284    | <i>Kabuli</i>    | Ca_Kabuli_Scaffold93         | 205677                         | (G/A)       |
| 16285       | CakSNP16285    | <i>Kabuli</i>    | Ca_Kabuli_Scaffold93         | 506983                         | (C/A)       |
| 16286       | CakSNP16286    | <i>Kabuli</i>    | Ca_Kabuli_Scaffold93         | 578138                         | (G/A)       |
| 16287       | CakSNP16287    | <i>Kabuli</i>    | Ca_Kabuli_Scaffold93         | 578146                         | (A/G)       |
| 16288       | CakSNP16288    | <i>Kabuli</i>    | Ca_Kabuli_Scaffold93         | 578158                         | (A/G)       |
| 16289       | CakSNP16289    | <i>Kabuli</i>    | Ca_Kabuli_Scaffold93         | 640373                         | (A/C)       |
| 16290       | CakSNP16290    | <i>Kabuli</i>    | Ca_Kabuli_Scaffold93         | 640389                         | (G/T)       |
| 16291       | CakSNP16291    | <i>Kabuli</i>    | Ca_Kabuli_Scaffold93         | 640430                         | (C/T)       |
| 16292       | CakSNP16292    | <i>Kabuli</i>    | Ca_Kabuli_Scaffold93         | 640487                         | (A/C)       |
| 16293       | CakSNP16293    | <i>Kabuli</i>    | Ca_Kabuli_Scaffold93         | 640459                         | (G/T)       |
| 16294       | CakSNP16294    | <i>Kabuli</i>    | Ca_Kabuli_Scaffold93         | 640448                         | (T/C)       |
| 16295       | CakSNP16295    | <i>Kabuli</i>    | Ca_Kabuli_Scaffold93         | 640445                         | (C/T)       |
| 16296       | CakSNP16296    | <i>Kabuli</i>    | Ca_Kabuli_Scaffold93         | 640444                         | (G/T)       |
| 16297       | CakSNP16297    | <i>Kabuli</i>    | Ca_Kabuli_Scaffold93         | 645328                         | (A/C)       |
| 16298       | CakSNP16298    | <i>Kabuli</i>    | Ca_Kabuli_Scaffold93         | 645344                         | (G/T)       |
| 16299       | CakSNP16299    | <i>Kabuli</i>    | Ca_Kabuli_Scaffold93         | 645442                         | (A/C)       |
| 16300       | CakSNP16300    | <i>Kabuli</i>    | Ca_Kabuli_Scaffold93         | 645414                         | (G/T)       |
| 16301       | CakSNP16301    | <i>Kabuli</i>    | Ca_Kabuli_Scaffold93         | 645403                         | (T/C)       |

| <b>S.N.</b> | <b>SNP IDs</b> | <b>Cultivars</b> | <b>Chromosomes/scaffolds</b> | <b>Physical positions (bp)</b> | <b>SNPs</b> |
|-------------|----------------|------------------|------------------------------|--------------------------------|-------------|
| 16302       | CakSNP16302    | <i>Kabuli</i>    | Ca_Kabuli_Scaffold93         | 645400                         | (C/T)       |
| 16303       | CakSNP16303    | <i>Kabuli</i>    | Ca_Kabuli_Scaffold93         | 645399                         | (G/T)       |
| 16304       | CakSNP16304    | <i>Kabuli</i>    | Ca_Kabuli_Scaffold93         | 645402                         | (G/A)       |
| 16305       | CakSNP16305    | <i>Kabuli</i>    | Ca_Kabuli_Scaffold93         | 651020                         | (C/T)       |
| 16306       | CakSNP16306    | <i>Kabuli</i>    | Ca_Kabuli_Scaffold93         | 651018                         | (C/T)       |
| 16307       | CakSNP16307    | <i>Kabuli</i>    | Ca_Kabuli_Scaffold93         | 651009                         | (A/G)       |
| 16308       | CakSNP16308    | <i>Kabuli</i>    | Ca_Kabuli_Scaffold93         | 650981                         | (T/C)       |
| 16309       | CakSNP16309    | <i>Kabuli</i>    | Ca_Kabuli_Scaffold93         | 650968                         | (G/A)       |
| 16310       | CakSNP16310    | <i>Kabuli</i>    | Ca_Kabuli_Scaffold93         | 650958                         | (G/A)       |
| 16311       | CakSNP16311    | <i>Kabuli</i>    | Ca_Kabuli_Scaffold93         | 650955                         | (T/C)       |
| 16312       | CakSNP16312    | <i>Kabuli</i>    | Ca_Kabuli_Scaffold931        | 13212                          | (T/C)       |
| 16313       | CakSNP16313    | <i>Kabuli</i>    | Ca_Kabuli_Scaffold9323       | 5263                           | (A/G)       |
| 16314       | CakSNP16314    | <i>Kabuli</i>    | Ca_Kabuli_Scaffold937        | 132087                         | (C/G)       |
| 16315       | CakSNP16315    | <i>Kabuli</i>    | Ca_Kabuli_Scaffold937        | 134580                         | (C/G)       |
| 16316       | CakSNP16316    | <i>Kabuli</i>    | Ca_Kabuli_Scaffold937        | 134707                         | (G/A)       |
| 16317       | CakSNP16317    | <i>Kabuli</i>    | Ca_Kabuli_Scaffold948        | 12188                          | (C/T)       |
| 16318       | CakSNP16318    | <i>Kabuli</i>    | Ca_Kabuli_Scaffold948        | 21152                          | (C/T)       |
| 16319       | CakSNP16319    | <i>Kabuli</i>    | Ca_Kabuli_Scaffold953        | 42329                          | (T/C)       |
| 16320       | CakSNP16320    | <i>Kabuli</i>    | Ca_Kabuli_Scaffold953        | 57413                          | (A/T)       |
| 16321       | CakSNP16321    | <i>Kabuli</i>    | Ca_Kabuli_Scaffold956        | 21441                          | (C/A)       |
| 16322       | CakSNP16322    | <i>Kabuli</i>    | Ca_Kabuli_Scaffold956        | 27612                          | (A/G)       |
| 16323       | CakSNP16323    | <i>Kabuli</i>    | Ca_Kabuli_Scaffold956        | 27710                          | (T/G)       |
| 16324       | CakSNP16324    | <i>Kabuli</i>    | Ca_Kabuli_Scaffold956        | 27693                          | (T/C)       |
| 16325       | CakSNP16325    | <i>Kabuli</i>    | Ca_Kabuli_Scaffold956        | 28015                          | (A/C)       |
| 16326       | CakSNP16326    | <i>Kabuli</i>    | Ca_Kabuli_Scaffold956        | 28014                          | (T/A)       |
| 16327       | CakSNP16327    | <i>Kabuli</i>    | Ca_Kabuli_Scaffold956        | 29736                          | (T/A)       |
| 16328       | CakSNP16328    | <i>Kabuli</i>    | Ca_Kabuli_Scaffold959        | 56173                          | (C/T)       |
| 16329       | CakSNP16329    | <i>Kabuli</i>    | Ca_Kabuli_Scaffold959        | 56159                          | (G/A)       |
| 16330       | CakSNP16330    | <i>Kabuli</i>    | Ca_Kabuli_Scaffold959        | 56156                          | (G/A)       |
| 16331       | CakSNP16331    | <i>Kabuli</i>    | Ca_Kabuli_Scaffold959        | 56117                          | (G/A)       |
| 16332       | CakSNP16332    | <i>Kabuli</i>    | Ca_Kabuli_Scaffold962        | 149524                         | (C/T)       |
| 16333       | CakSNP16333    | <i>Kabuli</i>    | Ca_Kabuli_Scaffold962        | 149545                         | (C/T)       |
| 16334       | CakSNP16334    | <i>Kabuli</i>    | Ca_Kabuli_Scaffold962        | 149580                         | (G/A)       |
| 16335       | CakSNP16335    | <i>Kabuli</i>    | Ca_Kabuli_Scaffold962        | 149585                         | (A/G)       |
| 16336       | CakSNP16336    | <i>Kabuli</i>    | Ca_Kabuli_Scaffold962        | 149645                         | (G/T)       |
| 16337       | CakSNP16337    | <i>Kabuli</i>    | Ca_Kabuli_Scaffold962        | 149631                         | (G/A)       |
| 16338       | CakSNP16338    | <i>Kabuli</i>    | Ca_Kabuli_Scaffold962        | 149589                         | (G/A)       |
| 16339       | CakSNP16339    | <i>Kabuli</i>    | Ca_Kabuli_Scaffold962        | 149583                         | (G/A)       |



| <b>S.N.</b> | <b>SNP IDs</b> | <b>Cultivars</b> | <b>Chromosomes/scaffolds</b> | <b>Physical positions (bp)</b> | <b>SNPs</b> |
|-------------|----------------|------------------|------------------------------|--------------------------------|-------------|
| 16340       | CakSNP16340    | <i>Kabuli</i>    | Ca_Kabuli_Scaffold962        | 149577                         | (G/T)       |
| 16341       | CakSNP16341    | <i>Kabuli</i>    | Ca_Kabuli_Scaffold962        | 149689                         | (G/A)       |
| 16342       | CakSNP16342    | <i>Kabuli</i>    | Ca_Kabuli_Scaffold962        | 149687                         | (A/T)       |
| 16343       | CakSNP16343    | <i>Kabuli</i>    | Ca_Kabuli_Scaffold962        | 149676                         | (T/C)       |
| 16344       | CakSNP16344    | <i>Kabuli</i>    | Ca_Kabuli_Scaffold962        | 149661                         | (G/A)       |
| 16345       | CakSNP16345    | <i>Kabuli</i>    | Ca_Kabuli_Scaffold962        | 149649                         | (C/T)       |
| 16346       | CakSNP16346    | <i>Kabuli</i>    | Ca_Kabuli_Scaffold962        | 149644                         | (C/T)       |
| 16347       | CakSNP16347    | <i>Kabuli</i>    | Ca_Kabuli_Scaffold962        | 149628                         | (G/A)       |
| 16348       | CakSNP16348    | <i>Kabuli</i>    | Ca_Kabuli_Scaffold962        | 149613                         | (G/T)       |
| 16349       | CakSNP16349    | <i>Kabuli</i>    | Ca_Kabuli_Scaffold963        | 77099                          | (C/T)       |
| 16350       | CakSNP16350    | <i>Kabuli</i>    | Ca_Kabuli_Scaffold98         | 287956                         | (T/A)       |
| 16351       | CakSNP16351    | <i>Kabuli</i>    | Ca_Kabuli_Scaffold98         | 287933                         | (T/C)       |
| 16352       | CakSNP16352    | <i>Kabuli</i>    | Ca_Kabuli_Scaffold98         | 388565                         | (T/C)       |
| 16353       | CakSNP16353    | <i>Kabuli</i>    | Ca_Kabuli_Scaffold98         | 434956                         | (A/G)       |
| 16354       | CakSNP16354    | <i>Kabuli</i>    | Ca_Kabuli_Scaffold98         | 440243                         | (G/C)       |
| 16355       | CakSNP16355    | <i>Kabuli</i>    | Ca_Kabuli_Scaffold98         | 447314                         | (G/C)       |
| 16356       | CakSNP16356    | <i>Kabuli</i>    | Ca_Kabuli_Scaffold98         | 447311                         | (G/A)       |
| 16357       | CakSNP16357    | <i>Kabuli</i>    | Ca_Kabuli_Scaffold98         | 485305                         | (G/C)       |
| 16358       | CakSNP16358    | <i>Kabuli</i>    | Ca_Kabuli_Scaffold98         | 485302                         | (G/A)       |
| 16359       | CakSNP16359    | <i>Kabuli</i>    | Ca_Kabuli_Scaffold98         | 533710                         | (T/C)       |
| 16360       | CakSNP16360    | <i>Kabuli</i>    | Ca_Kabuli_Scaffold98         | 533677                         | (T/A)       |
| 16361       | CakSNP16361    | <i>Kabuli</i>    | Ca_Kabuli_Scaffold98         | 533812                         | (G/C)       |
| 16362       | CakSNP16362    | <i>Kabuli</i>    | Ca_Kabuli_Scaffold98         | 562979                         | (G/A)       |
| 16363       | CakSNP16363    | <i>Kabuli</i>    | Ca_Kabuli_Scaffold98         | 563016                         | (T/C)       |
| 16364       | CakSNP16364    | <i>Kabuli</i>    | Ca_Kabuli_Scaffold98         | 563048                         | (A/C)       |
| 16365       | CakSNP16365    | <i>Kabuli</i>    | Ca_Kabuli_Scaffold981        | 84091                          | (G/A)       |
| 16366       | CakSNP16366    | <i>Kabuli</i>    | Ca_Kabuli_Scaffold981        | 84088                          | (C/G)       |
| 16367       | CakSNP16367    | <i>Kabuli</i>    | Ca_Kabuli_Scaffold981        | 84087                          | (C/A)       |
| 16368       | CakSNP16368    | <i>Kabuli</i>    | Ca_Kabuli_Scaffold981        | 84072                          | (G/A)       |
| 16369       | CakSNP16369    | <i>Kabuli</i>    | Ca_Kabuli_Scaffold981        | 84057                          | (A/G)       |
| 16370       | CakSNP16370    | <i>Kabuli</i>    | Ca_Kabuli_Scaffold981        | 84034                          | (C/T)       |
| 16371       | CakSNP16371    | <i>Kabuli</i>    | Ca_Kabuli_Scaffold981        | 84026                          | (G/C)       |
| 16372       | CakSNP16372    | <i>Kabuli</i>    | Ca_Kabuli_Scaffold981        | 84019                          | (C/T)       |
| 16373       | CakSNP16373    | <i>Kabuli</i>    | Ca_Kabuli_Scaffold981        | 84007                          | (C/G)       |
| 16374       | CakSNP16374    | <i>Kabuli</i>    | Ca_Kabuli_Scaffold999        | 77761                          | (A/T)       |
| 16375       | CakSNP16375    | <i>Kabuli</i>    | Ca_Kabuli_Scaffold999        | 77763                          | (C/T)       |
| 16376       | CakSNP16376    | <i>Kabuli</i>    | Ca_Kabuli_Scaffold999        | 77767                          | (A/T)       |
| 16377       | CakSNP16377    | <i>Kabuli</i>    | Ca_Kabuli_denovo             | 1061                           | (T/A)       |

| <b>S.N.</b> | <b>SNP IDs</b> | <b>Cultivars</b> | <b>Chromosomes/scaffolds</b> | <b>Physical positions (bp)</b> | <b>SNPs</b> |
|-------------|----------------|------------------|------------------------------|--------------------------------|-------------|
| 16378       | CakSNP16378    | <i>Kabuli</i>    | Ca_Kabuli_denovo             | 1965                           | (G/T)       |
| 16379       | CakSNP16379    | <i>Kabuli</i>    | Ca_Kabuli_denovo             | 1975                           | (G/A)       |
| 16380       | CakSNP16380    | <i>Kabuli</i>    | Ca_Kabuli_denovo             | 2003                           | (A/G)       |
| 16381       | CakSNP16381    | <i>Kabuli</i>    | Ca_Kabuli_denovo             | 2012                           | (T/G)       |
| 16382       | CakSNP16382    | <i>Kabuli</i>    | Ca_Kabuli_denovo             | 2047                           | (T/G)       |
| 16383       | CakSNP16383    | <i>Kabuli</i>    | Ca_Kabuli_denovo             | 3355                           | (C/A)       |
| 16384       | CakSNP16384    | <i>Kabuli</i>    | Ca_Kabuli_denovo             | 3357                           | (T/G)       |
| 16385       | CakSNP16385    | <i>Kabuli</i>    | Ca_Kabuli_denovo             | 3369                           | (C/G)       |
| 16386       | CakSNP16386    | <i>Kabuli</i>    | Ca_Kabuli_denovo             | 3376                           | (C/G)       |
| 16387       | CakSNP16387    | <i>Kabuli</i>    | Ca_Kabuli_denovo             | 3391                           | (A/G)       |
| 16388       | CakSNP16388    | <i>Kabuli</i>    | Ca_Kabuli_denovo             | 3398                           | (A/G)       |
| 16389       | CakSNP16389    | <i>Kabuli</i>    | Ca_Kabuli_denovo             | 3408                           | (C/G)       |
| 16390       | CakSNP16390    | <i>Kabuli</i>    | Ca_Kabuli_denovo             | 3410                           | (G/T)       |
| 16391       | CakSNP16391    | <i>Kabuli</i>    | Ca_Kabuli_denovo             | 3417                           | (G/A)       |
| 16392       | CakSNP16392    | <i>Kabuli</i>    | Ca_Kabuli_denovo             | 3427                           | (G/C)       |
| 16393       | CakSNP16393    | <i>Kabuli</i>    | Ca_Kabuli_denovo             | 3439                           | (C/G)       |
| 16394       | CakSNP16394    | <i>Kabuli</i>    | Ca_Kabuli_denovo             | 3710                           | (A/T)       |
| 16395       | CakSNP16395    | <i>Kabuli</i>    | Ca_Kabuli_denovo             | 3711                           | (T/G)       |
| 16396       | CakSNP16396    | <i>Kabuli</i>    | Ca_Kabuli_denovo             | 3712                           | (G/C)       |
| 16397       | CakSNP16397    | <i>Kabuli</i>    | Ca_Kabuli_denovo             | 3714                           | (C/G)       |
| 16398       | CakSNP16398    | <i>Kabuli</i>    | Ca_Kabuli_denovo             | 3715                           | (A/G)       |
| 16399       | CakSNP16399    | <i>Kabuli</i>    | Ca_Kabuli_denovo             | 3716                           | (G/A)       |
| 16400       | CakSNP16400    | <i>Kabuli</i>    | Ca_Kabuli_denovo             | 3717                           | (A/G)       |
| 16401       | CakSNP16401    | <i>Kabuli</i>    | Ca_Kabuli_denovo             | 3720                           | (G/T)       |
| 16402       | CakSNP16402    | <i>Kabuli</i>    | Ca_Kabuli_denovo             | 3721                           | (A/C)       |
| 16403       | CakSNP16403    | <i>Kabuli</i>    | Ca_Kabuli_denovo             | 3967                           | (G/A)       |
| 16404       | CakSNP16404    | <i>Kabuli</i>    | Ca_Kabuli_denovo             | 3968                           | (G/A)       |
| 16405       | CakSNP16405    | <i>Kabuli</i>    | Ca_Kabuli_denovo             | 3969                           | (A/G)       |
| 16406       | CakSNP16406    | <i>Kabuli</i>    | Ca_Kabuli_denovo             | 3970                           | (A/G)       |
| 16407       | CakSNP16407    | <i>Kabuli</i>    | Ca_Kabuli_denovo             | 3971                           | (G/A)       |
| 16408       | CakSNP16408    | <i>Kabuli</i>    | Ca_Kabuli_denovo             | 3972                           | (C/A)       |
| 16409       | CakSNP16409    | <i>Kabuli</i>    | Ca_Kabuli_denovo             | 3975                           | (T/G)       |
| 16410       | CakSNP16410    | <i>Kabuli</i>    | Ca_Kabuli_denovo             | 4061                           | (G/A)       |
| 16411       | CakSNP16411    | <i>Kabuli</i>    | Ca_Kabuli_denovo             | 4063                           | (G/A)       |
| 16412       | CakSNP16412    | <i>Kabuli</i>    | Ca_Kabuli_denovo             | 4064                           | (A/G)       |
| 16413       | CakSNP16413    | <i>Kabuli</i>    | Ca_Kabuli_denovo             | 4065                           | (G/C)       |
| 16414       | CakSNP16414    | <i>Kabuli</i>    | Ca_Kabuli_denovo             | 4066                           | (C/G)       |
| 16415       | CakSNP16415    | <i>Kabuli</i>    | Ca_Kabuli_denovo             | 4068                           | (T/G)       |

| <b>S.N.</b> | <b>SNP IDs</b> | <b>Cultivars</b> | <b>Chromosomes/scaffolds</b> | <b>Physical positions (bp)</b> | <b>SNPs</b> |
|-------------|----------------|------------------|------------------------------|--------------------------------|-------------|
| 16416       | CakSNP16416    | <i>Kabuli</i>    | Ca_Kabuli_denovo             | 4287                           | (C/G)       |
| 16417       | CakSNP16417    | <i>Kabuli</i>    | Ca_Kabuli_denovo             | 4288                           | (G/A)       |
| 16418       | CakSNP16418    | <i>Kabuli</i>    | Ca_Kabuli_denovo             | 4295                           | (A/G)       |
| 16419       | CakSNP16419    | <i>Kabuli</i>    | Ca_Kabuli_denovo             | 4299                           | (T/C)       |
| 16420       | CakSNP16420    | <i>Kabuli</i>    | Ca_Kabuli_denovo             | 4724                           | (A/G)       |
| 16421       | CakSNP16421    | <i>Kabuli</i>    | Ca_Kabuli_denovo             | 4725                           | (G/C)       |
| 16422       | CakSNP16422    | <i>Kabuli</i>    | Ca_Kabuli_denovo             | 4727                           | (G/A)       |
| 16423       | CakSNP16423    | <i>Kabuli</i>    | Ca_Kabuli_denovo             | 4728                           | (A/G)       |
| 16424       | CakSNP16424    | <i>Kabuli</i>    | Ca_Kabuli_denovo             | 4731                           | (C/A)       |
| 16425       | CakSNP16425    | <i>Kabuli</i>    | Ca_Kabuli_denovo             | 4732                           | (C/T)       |
| 16426       | CakSNP16426    | <i>Kabuli</i>    | Ca_Kabuli_denovo             | 5106                           | (C/G)       |
| 16427       | CakSNP16427    | <i>Kabuli</i>    | Ca_Kabuli_denovo             | 5108                           | (T/G)       |
| 16428       | CakSNP16428    | <i>Kabuli</i>    | Ca_Kabuli_denovo             | 5349                           | (T/G)       |
| 16429       | CakSNP16429    | <i>Kabuli</i>    | Ca_Kabuli_denovo             | 5394                           | (C/G)       |
| 16430       | CakSNP16430    | <i>Kabuli</i>    | Ca_Kabuli_denovo             | 5650                           | (C/G)       |
| 16431       | CakSNP16431    | <i>Kabuli</i>    | Ca_Kabuli_denovo             | 5652                           | (G/T)       |
| 16432       | CakSNP16432    | <i>Kabuli</i>    | Ca_Kabuli_denovo             | 5654                           | (C/T)       |
| 16433       | CakSNP16433    | <i>Kabuli</i>    | Ca_Kabuli_denovo             | 5655                           | (A/C)       |
| 16434       | CakSNP16434    | <i>Kabuli</i>    | Ca_Kabuli_denovo             | 5746                           | (G/C)       |
| 16435       | CakSNP16435    | <i>Kabuli</i>    | Ca_Kabuli_denovo             | 5747                           | (C/G)       |
| 16436       | CakSNP16436    | <i>Kabuli</i>    | Ca_Kabuli_denovo             | 5749                           | (G/T)       |
| 16437       | CakSNP16437    | <i>Kabuli</i>    | Ca_Kabuli_denovo             | 5751                           | (C/T)       |
| 16438       | CakSNP16438    | <i>Kabuli</i>    | Ca_Kabuli_denovo             | 5752                           | (A/C)       |
| 16439       | CakSNP16439    | <i>Kabuli</i>    | Ca_Kabuli_denovo             | 5851                           | (C/G)       |
| 16440       | CakSNP16440    | <i>Kabuli</i>    | Ca_Kabuli_denovo             | 5853                           | (G/T)       |
| 16441       | CakSNP16441    | <i>Kabuli</i>    | Ca_Kabuli_denovo             | 5855                           | (C/T)       |
| 16442       | CakSNP16442    | <i>Kabuli</i>    | Ca_Kabuli_denovo             | 5856                           | (A/C)       |
| 16443       | CakSNP16443    | <i>Kabuli</i>    | Ca_Kabuli_denovo             | 6702                           | (T/G)       |
| 16444       | CakSNP16444    | <i>Kabuli</i>    | Ca_Kabuli_denovo             | 6708                           | (C/G)       |
| 16445       | CakSNP16445    | <i>Kabuli</i>    | Ca_Kabuli_denovo             | 6727                           | (A/G)       |
| 16446       | CakSNP16446    | <i>Kabuli</i>    | Ca_Kabuli_denovo             | 6728                           | (C/G)       |
| 16447       | CakSNP16447    | <i>Kabuli</i>    | Ca_Kabuli_denovo             | 6739                           | (T/G)       |
| 16448       | CakSNP16448    | <i>Kabuli</i>    | Ca_Kabuli_denovo             | 6761                           | (T/G)       |
| 16449       | CakSNP16449    | <i>Kabuli</i>    | Ca_Kabuli_denovo             | 6773                           | (T/G)       |
| 16450       | CakSNP16450    | <i>Kabuli</i>    | Ca_Kabuli_denovo             | 7246                           | (C/A)       |
| 16451       | CakSNP16451    | <i>Kabuli</i>    | Ca_Kabuli_denovo             | 7247                           | (G/C)       |
| 16452       | CakSNP16452    | <i>Kabuli</i>    | Ca_Kabuli_denovo             | 7248                           | (A/C)       |
| 16453       | CakSNP16453    | <i>Kabuli</i>    | Ca_Kabuli_denovo             | 7251                           | (C/T)       |

| <b>S.N.</b> | <b>SNP IDs</b> | <b>Cultivars</b> | <b>Chromosomes/scaffolds</b> | <b>Physical positions (bp)</b> | <b>SNPs</b> |
|-------------|----------------|------------------|------------------------------|--------------------------------|-------------|
| 16454       | CakSNP16454    | <i>Kabuli</i>    | Ca_Kabuli_denovo             | 7253                           | (T/G)       |
| 16455       | CakSNP16455    | <i>Kabuli</i>    | Ca_Kabuli_denovo             | 7254                           | (C/A)       |
| 16456       | CakSNP16456    | <i>Kabuli</i>    | Ca_Kabuli_denovo             | 7255                           | (G/T)       |
| 16457       | CakSNP16457    | <i>Kabuli</i>    | Ca_Kabuli_denovo             | 7380                           | (A/T)       |
| 16458       | CakSNP16458    | <i>Kabuli</i>    | Ca_Kabuli_denovo             | 7690                           | (A/G)       |
| 16459       | CakSNP16459    | <i>Kabuli</i>    | Ca_Kabuli_denovo             | 7691                           | (C/G)       |
| 16460       | CakSNP16460    | <i>Kabuli</i>    | Ca_Kabuli_denovo             | 7883                           | (G/T)       |
| 16461       | CakSNP16461    | <i>Kabuli</i>    | Ca_Kabuli_denovo             | 7937                           | (C/G)       |
| 16462       | CakSNP16462    | <i>Kabuli</i>    | Ca_Kabuli_denovo             | 7944                           | (T/A)       |
| 16463       | CakSNP16463    | <i>Kabuli</i>    | Ca_Kabuli_denovo             | 7976                           | (T/G)       |
| 16464       | CakSNP16464    | <i>Kabuli</i>    | Ca_Kabuli_denovo             | 7999                           | (T/C)       |
| 16465       | CakSNP16465    | <i>Kabuli</i>    | Ca_Kabuli_denovo             | 8051                           | (C/A)       |
| 16466       | CakSNP16466    | <i>Kabuli</i>    | Ca_Kabuli_denovo             | 8069                           | (T/G)       |
| 16467       | CakSNP16467    | <i>Kabuli</i>    | Ca_Kabuli_denovo             | 8088                           | (C/A)       |
| 16468       | CakSNP16468    | <i>Kabuli</i>    | Ca_Kabuli_denovo             | 8136                           | (A/G)       |
| 16469       | CakSNP16469    | <i>Kabuli</i>    | Ca_Kabuli_denovo             | 8162                           | (T/G)       |
| 16470       | CakSNP16470    | <i>Kabuli</i>    | Ca_Kabuli_denovo             | 8537                           | (A/G)       |
| 16471       | CakSNP16471    | <i>Kabuli</i>    | Ca_Kabuli_denovo             | 8539                           | (A/C)       |
| 16472       | CakSNP16472    | <i>Kabuli</i>    | Ca_Kabuli_denovo             | 8541                           | (T/G)       |
| 16473       | CakSNP16473    | <i>Kabuli</i>    | Ca_Kabuli_denovo             | 9009                           | (G/A)       |
| 16474       | CakSNP16474    | <i>Kabuli</i>    | Ca_Kabuli_denovo             | 9010                           | (A/G)       |
| 16475       | CakSNP16475    | <i>Kabuli</i>    | Ca_Kabuli_denovo             | 9011                           | (A/G)       |
| 16476       | CakSNP16476    | <i>Kabuli</i>    | Ca_Kabuli_denovo             | 9012                           | (C/A)       |
| 16477       | CakSNP16477    | <i>Kabuli</i>    | Ca_Kabuli_denovo             | 11242                          | (C/G)       |
| 16478       | CakSNP16478    | <i>Kabuli</i>    | Ca_Kabuli_denovo             | 11244                          | (T/G)       |
| 16479       | CakSNP16479    | <i>Kabuli</i>    | Ca_Kabuli_denovo             | 11246                          | (C/T)       |
| 16480       | CakSNP16480    | <i>Kabuli</i>    | Ca_Kabuli_denovo             | 11711                          | (G/T)       |
| 16481       | CakSNP16481    | <i>Kabuli</i>    | Ca_Kabuli_denovo             | 12623                          | (A/G)       |
| 16482       | CakSNP16482    | <i>Kabuli</i>    | Ca_Kabuli_denovo             | 12624                          | (G/C)       |
| 16483       | CakSNP16483    | <i>Kabuli</i>    | Ca_Kabuli_denovo             | 12625                          | (C/G)       |
| 16484       | CakSNP16484    | <i>Kabuli</i>    | Ca_Kabuli_denovo             | 12627                          | (T/G)       |
| 16485       | CakSNP16485    | <i>Kabuli</i>    | Ca_Kabuli_denovo             | 12629                          | (C/T)       |
| 16486       | CakSNP16486    | <i>Kabuli</i>    | Ca_Kabuli_denovo             | 12630                          | (A/C)       |
| 16487       | CakSNP16487    | <i>Kabuli</i>    | Ca_Kabuli_denovo             | 13473                          | (G/A)       |
| 16488       | CakSNP16488    | <i>Kabuli</i>    | Ca_Kabuli_denovo             | 13475                          | (G/A)       |
| 16489       | CakSNP16489    | <i>Kabuli</i>    | Ca_Kabuli_denovo             | 13476                          | (A/G)       |
| 16490       | CakSNP16490    | <i>Kabuli</i>    | Ca_Kabuli_denovo             | 14124                          | (A/C)       |
| 16491       | CakSNP16491    | <i>Kabuli</i>    | Ca_Kabuli_denovo             | 14560                          | (C/A)       |

| <b>S.N.</b> | <b>SNP IDs</b> | <b>Cultivars</b> | <b>Chromosomes/scaffolds</b> | <b>Physical positions (bp)</b> | <b>SNPs</b> |
|-------------|----------------|------------------|------------------------------|--------------------------------|-------------|
| 16492       | CakSNP16492    | <i>Kabuli</i>    | Ca_Kabuli_denovo             | 14672                          | (G/A)       |
| 16493       | CakSNP16493    | <i>Kabuli</i>    | Ca_Kabuli_denovo             | 14674                          | (G/A)       |
| 16494       | CakSNP16494    | <i>Kabuli</i>    | Ca_Kabuli_denovo             | 15543                          | (G/A)       |
| 16495       | CakSNP16495    | <i>Kabuli</i>    | Ca_Kabuli_denovo             | 15553                          | (C/A)       |
| 16496       | CakSNP16496    | <i>Kabuli</i>    | Ca_Kabuli_denovo             | 15580                          | (G/A)       |
| 16497       | CakSNP16497    | <i>Kabuli</i>    | Ca_Kabuli_denovo             | 17223                          | (C/G)       |
| 16498       | CakSNP16498    | <i>Kabuli</i>    | Ca_Kabuli_denovo             | 17468                          | (A/G)       |
| 16499       | CakSNP16499    | <i>Kabuli</i>    | Ca_Kabuli_denovo             | 17469                          | (G/C)       |
| 16500       | CakSNP16500    | <i>Kabuli</i>    | Ca_Kabuli_denovo             | 17470                          | (C/G)       |
| 16501       | CakSNP16501    | <i>Kabuli</i>    | Ca_Kabuli_denovo             | 17472                          | (T/G)       |
| 16502       | CakSNP16502    | <i>Kabuli</i>    | Ca_Kabuli_denovo             | 17733                          | (G/C)       |
| 16503       | CakSNP16503    | <i>Kabuli</i>    | Ca_Kabuli_denovo             | 17734                          | (C/G)       |
| 16504       | CakSNP16504    | <i>Kabuli</i>    | Ca_Kabuli_denovo             | 17736                          | (T/G)       |
| 16505       | CakSNP16505    | <i>Kabuli</i>    | Ca_Kabuli_denovo             | 17738                          | (C/T)       |
| 16506       | CakSNP16506    | <i>Kabuli</i>    | Ca_Kabuli_denovo             | 18017                          | (G/A)       |
| 16507       | CakSNP16507    | <i>Kabuli</i>    | Ca_Kabuli_denovo             | 18019                          | (G/A)       |
| 16508       | CakSNP16508    | <i>Kabuli</i>    | Ca_Kabuli_denovo             | 18050                          | (G/C)       |
| 16509       | CakSNP16509    | <i>Kabuli</i>    | Ca_Kabuli_denovo             | 18291                          | (C/G)       |
| 16510       | CakSNP16510    | <i>Kabuli</i>    | Ca_Kabuli_denovo             | 18293                          | (G/T)       |
| 16511       | CakSNP16511    | <i>Kabuli</i>    | Ca_Kabuli_denovo             | 18295                          | (C/T)       |
| 16512       | CakSNP16512    | <i>Kabuli</i>    | Ca_Kabuli_denovo             | 18296                          | (A/C)       |
| 16513       | CakSNP16513    | <i>Kabuli</i>    | Ca_Kabuli_denovo             | 18297                          | (G/A)       |
| 16514       | CakSNP16514    | <i>Kabuli</i>    | Ca_Kabuli_denovo             | 18394                          | (T/G)       |
| 16515       | CakSNP16515    | <i>Kabuli</i>    | Ca_Kabuli_denovo             | 18450                          | (G/A)       |
| 16516       | CakSNP16516    | <i>Kabuli</i>    | Ca_Kabuli_denovo             | 19005                          | (C/T)       |
| 16517       | CakSNP16517    | <i>Kabuli</i>    | Ca_Kabuli_denovo             | 19041                          | (T/C)       |
| 16518       | CakSNP16518    | <i>Kabuli</i>    | Ca_Kabuli_denovo             | 19048                          | (G/C)       |
| 16519       | CakSNP16519    | <i>Kabuli</i>    | Ca_Kabuli_denovo             | 20080                          | (C/G)       |
| 16520       | CakSNP16520    | <i>Kabuli</i>    | Ca_Kabuli_denovo             | 20081                          | (G/A)       |
| 16521       | CakSNP16521    | <i>Kabuli</i>    | Ca_Kabuli_denovo             | 20082                          | (A/T)       |
| 16522       | CakSNP16522    | <i>Kabuli</i>    | Ca_Kabuli_denovo             | 20083                          | (G/C)       |
| 16523       | CakSNP16523    | <i>Kabuli</i>    | Ca_Kabuli_denovo             | 20084                          | (T/A)       |
| 16524       | CakSNP16524    | <i>Kabuli</i>    | Ca_Kabuli_denovo             | 20086                          | (G/C)       |
| 16525       | CakSNP16525    | <i>Kabuli</i>    | Ca_Kabuli_denovo             | 20087                          | (T/G)       |
| 16526       | CakSNP16526    | <i>Kabuli</i>    | Ca_Kabuli_denovo             | 21257                          | (C/A)       |
| 16527       | CakSNP16527    | <i>Kabuli</i>    | Ca_Kabuli_denovo             | 22000                          | (T/G)       |
| 16528       | CakSNP16528    | <i>Kabuli</i>    | Ca_Kabuli_denovo             | 22013                          | (A/G)       |
| 16529       | CakSNP16529    | <i>Kabuli</i>    | Ca_Kabuli_denovo             | 22039                          | (G/T)       |

| <b>S.N.</b> | <b>SNP IDs</b> | <b>Cultivars</b> | <b>Chromosomes/scaffolds</b> | <b>Physical positions (bp)</b> | <b>SNPs</b> |
|-------------|----------------|------------------|------------------------------|--------------------------------|-------------|
| 16530       | CakSNP16530    | <i>Kabuli</i>    | Ca_Kabuli_denovo             | 22242                          | (A/G)       |
| 16531       | CakSNP16531    | <i>Kabuli</i>    | Ca_Kabuli_denovo             | 22320                          | (T/A)       |
| 16532       | CakSNP16532    | <i>Kabuli</i>    | Ca_Kabuli_denovo             | 27708                          | (C/G)       |
| 16533       | CakSNP16533    | <i>Kabuli</i>    | Ca_Kabuli_denovo             | 27709                          | (G/A)       |
| 16534       | CakSNP16534    | <i>Kabuli</i>    | Ca_Kabuli_denovo             | 27710                          | (G/A)       |
| 16535       | CakSNP16535    | <i>Kabuli</i>    | Ca_Kabuli_denovo             | 27711                          | (A/G)       |
| 16536       | CakSNP16536    | <i>Kabuli</i>    | Ca_Kabuli_denovo             | 27712                          | (C/A)       |
| 16537       | CakSNP16537    | <i>Kabuli</i>    | Ca_Kabuli_denovo             | 27714                          | (G/C)       |
| 16538       | CakSNP16538    | <i>Kabuli</i>    | Ca_Kabuli_denovo             | 27715                          | (A/G)       |
| 16539       | CakSNP16539    | <i>Kabuli</i>    | Ca_Kabuli_denovo             | 28816                          | (G/T)       |
| 16540       | CakSNP16540    | <i>Kabuli</i>    | Ca_Kabuli_denovo             | 28818                          | (C/T)       |
| 16541       | CakSNP16541    | <i>Kabuli</i>    | Ca_Kabuli_denovo             | 29384                          | (A/G)       |
| 16542       | CakSNP16542    | <i>Kabuli</i>    | Ca_Kabuli_denovo             | 32328                          | (G/A)       |
| 16543       | CakSNP16543    | <i>Kabuli</i>    | Ca_Kabuli_denovo             | 32330                          | (G/A)       |
| 16544       | CakSNP16544    | <i>Kabuli</i>    | Ca_Kabuli_denovo             | 32331                          | (A/G)       |
| 16545       | CakSNP16545    | <i>Kabuli</i>    | Ca_Kabuli_denovo             | 33189                          | (G/A)       |
| 16546       | CakSNP16546    | <i>Kabuli</i>    | Ca_Kabuli_denovo             | 34679                          | (G/T)       |
| 16547       | CakSNP16547    | <i>Kabuli</i>    | Ca_Kabuli_denovo             | 34680                          | (C/G)       |
| 16548       | CakSNP16548    | <i>Kabuli</i>    | Ca_Kabuli_denovo             | 34682                          | (C/G)       |
| 16549       | CakSNP16549    | <i>Kabuli</i>    | Ca_Kabuli_denovo             | 34683                          | (G/A)       |
| 16550       | CakSNP16550    | <i>Kabuli</i>    | Ca_Kabuli_denovo             | 34684                          | (A/G)       |
| 16551       | CakSNP16551    | <i>Kabuli</i>    | Ca_Kabuli_denovo             | 34685                          | (G/A)       |
| 16552       | CakSNP16552    | <i>Kabuli</i>    | Ca_Kabuli_denovo             | 34858                          | (G/A)       |
| 16553       | CakSNP16553    | <i>Kabuli</i>    | Ca_Kabuli_denovo             | 34860                          | (G/A)       |
| 16554       | CakSNP16554    | <i>Kabuli</i>    | Ca_Kabuli_denovo             | 35627                          | (T/G)       |
| 16555       | CakSNP16555    | <i>Kabuli</i>    | Ca_Kabuli_denovo             | 35634                          | (A/G)       |
| 16556       | CakSNP16556    | <i>Kabuli</i>    | Ca_Kabuli_denovo             | 35645                          | (C/A)       |
| 16557       | CakSNP16557    | <i>Kabuli</i>    | Ca_Kabuli_denovo             | 35661                          | (G/A)       |
| 16558       | CakSNP16558    | <i>Kabuli</i>    | Ca_Kabuli_denovo             | 35679                          | (C/G)       |
| 16559       | CakSNP16559    | <i>Kabuli</i>    | Ca_Kabuli_denovo             | 36295                          | (C/G)       |
| 16560       | CakSNP16560    | <i>Kabuli</i>    | Ca_Kabuli_denovo             | 36358                          | (G/C)       |
| 16561       | CakSNP16561    | <i>Kabuli</i>    | Ca_Kabuli_denovo             | 36359                          | (T/A)       |
| 16562       | CakSNP16562    | <i>Kabuli</i>    | Ca_Kabuli_denovo             | 36361                          | (G/C)       |
| 16563       | CakSNP16563    | <i>Kabuli</i>    | Ca_Kabuli_denovo             | 36362                          | (T/G)       |
| 16564       | CakSNP16564    | <i>Kabuli</i>    | Ca_Kabuli_denovo             | 36544                          | (T/G)       |
| 16565       | CakSNP16565    | <i>Kabuli</i>    | Ca_Kabuli_denovo             | 36545                          | (G/C)       |
| 16566       | CakSNP16566    | <i>Kabuli</i>    | Ca_Kabuli_denovo             | 36547                          | (G/C)       |
| 16567       | CakSNP16567    | <i>Kabuli</i>    | Ca_Kabuli_denovo             | 36548                          | (A/G)       |

| <b>S.N.</b> | <b>SNP IDs</b> | <b>Cultivars</b> | <b>Chromosomes/scaffolds</b> | <b>Physical positions (bp)</b> | <b>SNPs</b> |
|-------------|----------------|------------------|------------------------------|--------------------------------|-------------|
| 16568       | CakSNP16568    | <i>Kabuli</i>    | Ca_Kabuli_denovo             | 36549                          | (G/A)       |
| 16569       | CakSNP16569    | <i>Kabuli</i>    | Ca_Kabuli_denovo             | 36550                          | (A/G)       |
| 16570       | CakSNP16570    | <i>Kabuli</i>    | Ca_Kabuli_denovo             | 36620                          | (G/C)       |
| 16571       | CakSNP16571    | <i>Kabuli</i>    | Ca_Kabuli_denovo             | 36621                          | (C/A)       |
| 16572       | CakSNP16572    | <i>Kabuli</i>    | Ca_Kabuli_denovo             | 36622                          | (A/G)       |
| 16573       | CakSNP16573    | <i>Kabuli</i>    | Ca_Kabuli_denovo             | 36624                          | (A/G)       |
| 16574       | CakSNP16574    | <i>Kabuli</i>    | Ca_Kabuli_denovo             | 36626                          | (T/A)       |
| 16575       | CakSNP16575    | <i>Kabuli</i>    | Ca_Kabuli_denovo             | 36627                          | (G/T)       |
| 16576       | CakSNP16576    | <i>Kabuli</i>    | Ca_Kabuli_denovo             | 36628                          | (C/G)       |
| 16577       | CakSNP16577    | <i>Kabuli</i>    | Ca_Kabuli_denovo             | 36630                          | (G/C)       |
| 16578       | CakSNP16578    | <i>Kabuli</i>    | Ca_Kabuli_denovo             | 37457                          | (G/C)       |
| 16579       | CakSNP16579    | <i>Kabuli</i>    | Ca_Kabuli_denovo             | 37458                          | (C/A)       |
| 16580       | CakSNP16580    | <i>Kabuli</i>    | Ca_Kabuli_denovo             | 37459                          | (A/G)       |
| 16581       | CakSNP16581    | <i>Kabuli</i>    | Ca_Kabuli_denovo             | 37461                          | (G/A)       |
| 16582       | CakSNP16582    | <i>Kabuli</i>    | Ca_Kabuli_denovo             | 37463                          | (A/T)       |
| 16583       | CakSNP16583    | <i>Kabuli</i>    | Ca_Kabuli_denovo             | 37464                          | (T/G)       |
| 16584       | CakSNP16584    | <i>Kabuli</i>    | Ca_Kabuli_denovo             | 37465                          | (C/G)       |
| 16585       | CakSNP16585    | <i>Kabuli</i>    | Ca_Kabuli_denovo             | 37467                          | (G/C)       |
| 16586       | CakSNP16586    | <i>Kabuli</i>    | Ca_Kabuli_denovo             | 37468                          | (A/G)       |
| 16587       | CakSNP16587    | <i>Kabuli</i>    | Ca_Kabuli_denovo             | 37469                          | (G/A)       |
| 16588       | CakSNP16588    | <i>Kabuli</i>    | Ca_Kabuli_denovo             | 38106                          | (G/A)       |
| 16589       | CakSNP16589    | <i>Kabuli</i>    | Ca_Kabuli_denovo             | 38108                          | (T/G)       |
| 16590       | CakSNP16590    | <i>Kabuli</i>    | Ca_Kabuli_denovo             | 38109                          | (T/A)       |
| 16591       | CakSNP16591    | <i>Kabuli</i>    | Ca_Kabuli_denovo             | 38110                          | (C/A)       |
| 16592       | CakSNP16592    | <i>Kabuli</i>    | Ca_Kabuli_denovo             | 38111                          | (T/A)       |
| 16593       | CakSNP16593    | <i>Kabuli</i>    | Ca_Kabuli_denovo             | 38114                          | (C/A)       |
| 16594       | CakSNP16594    | <i>Kabuli</i>    | Ca_Kabuli_denovo             | 38932                          | (G/A)       |
| 16595       | CakSNP16595    | <i>Kabuli</i>    | Ca_Kabuli_denovo             | 38934                          | (G/A)       |
| 16596       | CakSNP16596    | <i>Kabuli</i>    | Ca_Kabuli_denovo             | 40259                          | (A/G)       |
| 16597       | CakSNP16597    | <i>Kabuli</i>    | Ca_Kabuli_denovo             | 40260                          | (G/C)       |
| 16598       | CakSNP16598    | <i>Kabuli</i>    | Ca_Kabuli_denovo             | 40261                          | (C/A)       |
| 16599       | CakSNP16599    | <i>Kabuli</i>    | Ca_Kabuli_denovo             | 40262                          | (A/G)       |
| 16600       | CakSNP16600    | <i>Kabuli</i>    | Ca_Kabuli_denovo             | 40264                          | (G/A)       |
| 16601       | CakSNP16601    | <i>Kabuli</i>    | Ca_Kabuli_denovo             | 40266                          | (T/A)       |
| 16602       | CakSNP16602    | <i>Kabuli</i>    | Ca_Kabuli_denovo             | 40267                          | (G/T)       |
| 16603       | CakSNP16603    | <i>Kabuli</i>    | Ca_Kabuli_denovo             | 40268                          | (C/G)       |
| 16604       | CakSNP16604    | <i>Kabuli</i>    | Ca_Kabuli_denovo             | 40270                          | (G/C)       |
| 16605       | CakSNP16605    | <i>Kabuli</i>    | Ca_Kabuli_denovo             | 41456                          | (T/C)       |

| <b>S.N.</b> | <b>SNP IDs</b> | <b>Cultivars</b> | <b>Chromosomes/scaffolds</b> | <b>Physical positions (bp)</b> | <b>SNPs</b> |
|-------------|----------------|------------------|------------------------------|--------------------------------|-------------|
| 16606       | CakSNP16606    | <i>Kabuli</i>    | Ca_Kabuli_denovo             | 41457                          | (T/A)       |
| 16607       | CakSNP16607    | <i>Kabuli</i>    | Ca_Kabuli_denovo             | 41458                          | (G/C)       |
| 16608       | CakSNP16608    | <i>Kabuli</i>    | Ca_Kabuli_denovo             | 41460                          | (A/G)       |
| 16609       | CakSNP16609    | <i>Kabuli</i>    | Ca_Kabuli_denovo             | 41888                          | (A/T)       |
| 16610       | CakSNP16610    | <i>Kabuli</i>    | Ca_Kabuli_denovo             | 41895                          | (C/A)       |
| 16611       | CakSNP16611    | <i>Kabuli</i>    | Ca_Kabuli_denovo             | 44072                          | (T/G)       |
| 16612       | CakSNP16612    | <i>Kabuli</i>    | Ca_Kabuli_denovo             | 44074                          | (C/T)       |
| 16613       | CakSNP16613    | <i>Kabuli</i>    | Ca_Kabuli_denovo             | 45632                          | (A/C)       |
| 16614       | CakSNP16614    | <i>Kabuli</i>    | Ca_Kabuli_denovo             | 45635                          | (C/T)       |
| 16615       | CakSNP16615    | <i>Kabuli</i>    | Ca_Kabuli_denovo             | 45637                          | (T/G)       |
| 16616       | CakSNP16616    | <i>Kabuli</i>    | Ca_Kabuli_denovo             | 45639                          | (G/A)       |
| 16617       | CakSNP16617    | <i>Kabuli</i>    | Ca_Kabuli_denovo             | 48879                          | (T/G)       |
| 16618       | CakSNP16618    | <i>Kabuli</i>    | Ca_Kabuli_denovo             | 49259                          | (G/A)       |
| 16619       | CakSNP16619    | <i>Kabuli</i>    | Ca_Kabuli_denovo             | 49260                          | (A/G)       |
| 16620       | CakSNP16620    | <i>Kabuli</i>    | Ca_Kabuli_denovo             | 49261                          | (A/G)       |
| 16621       | CakSNP16621    | <i>Kabuli</i>    | Ca_Kabuli_denovo             | 49262                          | (G/A)       |
| 16622       | CakSNP16622    | <i>Kabuli</i>    | Ca_Kabuli_denovo             | 49263                          | (C/A)       |
| 16623       | CakSNP16623    | <i>Kabuli</i>    | Ca_Kabuli_denovo             | 49265                          | (G/C)       |
| 16624       | CakSNP16624    | <i>Kabuli</i>    | Ca_Kabuli_denovo             | 49932                          | (C/G)       |
| 16625       | CakSNP16625    | <i>Kabuli</i>    | Ca_Kabuli_denovo             | 49934                          | (T/G)       |
| 16626       | CakSNP16626    | <i>Kabuli</i>    | Ca_Kabuli_denovo             | 49936                          | (C/T)       |
| 16627       | CakSNP16627    | <i>Kabuli</i>    | Ca_Kabuli_denovo             | 50705                          | (T/G)       |
| 16628       | CakSNP16628    | <i>Kabuli</i>    | Ca_Kabuli_denovo             | 50712                          | (T/C)       |
| 16629       | CakSNP16629    | <i>Kabuli</i>    | Ca_Kabuli_denovo             | 50914                          | (G/A)       |
| 16630       | CakSNP16630    | <i>Kabuli</i>    | Ca_Kabuli_denovo             | 51290                          | (C/G)       |
| 16631       | CakSNP16631    | <i>Kabuli</i>    | Ca_Kabuli_denovo             | 51357                          | (T/G)       |
| 16632       | CakSNP16632    | <i>Kabuli</i>    | Ca_Kabuli_denovo             | 51491                          | (A/G)       |
| 16633       | CakSNP16633    | <i>Kabuli</i>    | Ca_Kabuli_denovo             | 51528                          | (T/C)       |
| 16634       | CakSNP16634    | <i>Kabuli</i>    | Ca_Kabuli_denovo             | 51691                          | (G/C)       |
| 16635       | CakSNP16635    | <i>Kabuli</i>    | Ca_Kabuli_denovo             | 51720                          | (T/G)       |
| 16636       | CakSNP16636    | <i>Kabuli</i>    | Ca_Kabuli_denovo             | 51737                          | (C/G)       |
| 16637       | CakSNP16637    | <i>Kabuli</i>    | Ca_Kabuli_denovo             | 51993                          | (T/G)       |
| 16638       | CakSNP16638    | <i>Kabuli</i>    | Ca_Kabuli_denovo             | 52004                          | (C/A)       |
| 16639       | CakSNP16639    | <i>Kabuli</i>    | Ca_Kabuli_denovo             | 52027                          | (G/T)       |
| 16640       | CakSNP16640    | <i>Kabuli</i>    | Ca_Kabuli_denovo             | 52098                          | (A/G)       |
| 16641       | CakSNP16641    | <i>Kabuli</i>    | Ca_Kabuli_denovo             | 52113                          | (G/T)       |
| 16642       | CakSNP16642    | <i>Kabuli</i>    | Ca_Kabuli_denovo             | 52290                          | (A/G)       |
| 16643       | CakSNP16643    | <i>Kabuli</i>    | Ca_Kabuli_denovo             | 52303                          | (A/C)       |



| <b>S.N.</b> | <b>SNP IDs</b> | <b>Cultivars</b> | <b>Chromosomes/scaffolds</b> | <b>Physical positions (bp)</b> | <b>SNPs</b> |
|-------------|----------------|------------------|------------------------------|--------------------------------|-------------|
| 16644       | CakSNP16644    | <i>Kabuli</i>    | Ca_Kabuli_denovo             | 53001                          | (C/A)       |
| 16645       | CakSNP16645    | <i>Kabuli</i>    | Ca_Kabuli_denovo             | 53002                          | (A/G)       |
| 16646       | CakSNP16646    | <i>Kabuli</i>    | Ca_Kabuli_denovo             | 53003                          | (G/C)       |
| 16647       | CakSNP16647    | <i>Kabuli</i>    | Ca_Kabuli_denovo             | 53207                          | (T/G)       |
| 16648       | CakSNP16648    | <i>Kabuli</i>    | Ca_Kabuli_denovo             | 53219                          | (C/A)       |
| 16649       | CakSNP16649    | <i>Kabuli</i>    | Ca_Kabuli_denovo             | 53399                          | (G/C)       |
| 16650       | CakSNP16650    | <i>Kabuli</i>    | Ca_Kabuli_denovo             | 53594                          | (G/A)       |
| 16651       | CakSNP16651    | <i>Kabuli</i>    | Ca_Kabuli_denovo             | 53782                          | (C/A)       |
| 16652       | CakSNP16652    | <i>Kabuli</i>    | Ca_Kabuli_denovo             | 53972                          | (G/A)       |
| 16653       | CakSNP16653    | <i>Kabuli</i>    | Ca_Kabuli_denovo             | 54229                          | (T/G)       |
| 16654       | CakSNP16654    | <i>Kabuli</i>    | Ca_Kabuli_denovo             | 54262                          | (A/G)       |
| 16655       | CakSNP16655    | <i>Kabuli</i>    | Ca_Kabuli_denovo             | 54267                          | (T/G)       |
| 16656       | CakSNP16656    | <i>Kabuli</i>    | Ca_Kabuli_denovo             | 54513                          | (C/G)       |
| 16657       | CakSNP16657    | <i>Kabuli</i>    | Ca_Kabuli_denovo             | 54540                          | (A/G)       |
| 16658       | CakSNP16658    | <i>Kabuli</i>    | Ca_Kabuli_denovo             | 54870                          | (A/C)       |
| 16659       | CakSNP16659    | <i>Kabuli</i>    | Ca_Kabuli_denovo             | 54877                          | (A/G)       |
| 16660       | CakSNP16660    | <i>Kabuli</i>    | Ca_Kabuli_denovo             | 54880                          | (T/C)       |
| 16661       | CakSNP16661    | <i>Kabuli</i>    | Ca_Kabuli_denovo             | 54888                          | (C/G)       |
| 16662       | CakSNP16662    | <i>Kabuli</i>    | Ca_Kabuli_denovo             | 54895                          | (T/G)       |
| 16663       | CakSNP16663    | <i>Kabuli</i>    | Ca_Kabuli_denovo             | 54900                          | (C/G)       |
| 16664       | CakSNP16664    | <i>Kabuli</i>    | Ca_Kabuli_denovo             | 54909                          | (T/G)       |
| 16665       | CakSNP16665    | <i>Kabuli</i>    | Ca_Kabuli_denovo             | 54910                          | (C/G)       |
| 16666       | CakSNP16666    | <i>Kabuli</i>    | Ca_Kabuli_denovo             | 54911                          | (A/G)       |
| 16667       | CakSNP16667    | <i>Kabuli</i>    | Ca_Kabuli_denovo             | 54915                          | (T/A)       |
| 16668       | CakSNP16668    | <i>Kabuli</i>    | Ca_Kabuli_denovo             | 54932                          | (T/G)       |
| 16669       | CakSNP16669    | <i>Kabuli</i>    | Ca_Kabuli_denovo             | 55406                          | (T/C)       |
| 16670       | CakSNP16670    | <i>Kabuli</i>    | Ca_Kabuli_denovo             | 55407                          | (T/A)       |
| 16671       | CakSNP16671    | <i>Kabuli</i>    | Ca_Kabuli_denovo             | 55408                          | (G/C)       |
| 16672       | CakSNP16672    | <i>Kabuli</i>    | Ca_Kabuli_denovo             | 55409                          | (C/A)       |
| 16673       | CakSNP16673    | <i>Kabuli</i>    | Ca_Kabuli_denovo             | 55504                          | (G/C)       |
| 16674       | CakSNP16674    | <i>Kabuli</i>    | Ca_Kabuli_denovo             | 55505                          | (G/A)       |
| 16675       | CakSNP16675    | <i>Kabuli</i>    | Ca_Kabuli_denovo             | 55506                          | (A/G)       |
| 16676       | CakSNP16676    | <i>Kabuli</i>    | Ca_Kabuli_denovo             | 56193                          | (T/G)       |
| 16677       | CakSNP16677    | <i>Kabuli</i>    | Ca_Kabuli_denovo             | 56223                          | (T/G)       |
| 16678       | CakSNP16678    | <i>Kabuli</i>    | Ca_Kabuli_denovo             | 56260                          | (G/C)       |
| 16679       | CakSNP16679    | <i>Kabuli</i>    | Ca_Kabuli_denovo             | 56261                          | (G/A)       |
| 16680       | CakSNP16680    | <i>Kabuli</i>    | Ca_Kabuli_denovo             | 56262                          | (A/C)       |
| 16681       | CakSNP16681    | <i>Kabuli</i>    | Ca_Kabuli_denovo             | 56263                          | (T/C)       |

| <b>S.N.</b> | <b>SNP IDs</b> | <b>Cultivars</b> | <b>Chromosomes/scaffolds</b> | <b>Physical positions (bp)</b> | <b>SNPs</b> |
|-------------|----------------|------------------|------------------------------|--------------------------------|-------------|
| 16682       | CakSNP16682    | <i>Kabuli</i>    | Ca_Kabuli_denovo             | 56264                          | (C/G)       |
| 16683       | CakSNP16683    | <i>Kabuli</i>    | Ca_Kabuli_denovo             | 56266                          | (C/T)       |
| 16684       | CakSNP16684    | <i>Kabuli</i>    | Ca_Kabuli_denovo             | 56344                          | (G/C)       |
| 16685       | CakSNP16685    | <i>Kabuli</i>    | Ca_Kabuli_denovo             | 56345                          | (A/G)       |
| 16686       | CakSNP16686    | <i>Kabuli</i>    | Ca_Kabuli_denovo             | 56442                          | (C/A)       |
| 16687       | CakSNP16687    | <i>Kabuli</i>    | Ca_Kabuli_denovo             | 56443                          | (G/C)       |
| 16688       | CakSNP16688    | <i>Kabuli</i>    | Ca_Kabuli_denovo             | 56444                          | (A/G)       |
| 16689       | CakSNP16689    | <i>Kabuli</i>    | Ca_Kabuli_denovo             | 56620                          | (C/A)       |
| 16690       | CakSNP16690    | <i>Kabuli</i>    | Ca_Kabuli_denovo             | 56621                          | (A/T)       |
| 16691       | CakSNP16691    | <i>Kabuli</i>    | Ca_Kabuli_denovo             | 56623                          | (G/C)       |
| 16692       | CakSNP16692    | <i>Kabuli</i>    | Ca_Kabuli_denovo             | 56624                          | (C/A)       |
| 16693       | CakSNP16693    | <i>Kabuli</i>    | Ca_Kabuli_denovo             | 56625                          | (G/A)       |
| 16694       | CakSNP16694    | <i>Kabuli</i>    | Ca_Kabuli_denovo             | 56721                          | (C/A)       |
| 16695       | CakSNP16695    | <i>Kabuli</i>    | Ca_Kabuli_denovo             | 56723                          | (C/G)       |
| 16696       | CakSNP16696    | <i>Kabuli</i>    | Ca_Kabuli_denovo             | 56724                          | (G/A)       |
| 16697       | CakSNP16697    | <i>Kabuli</i>    | Ca_Kabuli_denovo             | 56811                          | (A/T)       |
| 16698       | CakSNP16698    | <i>Kabuli</i>    | Ca_Kabuli_denovo             | 56812                          | (T/G)       |
| 16699       | CakSNP16699    | <i>Kabuli</i>    | Ca_Kabuli_denovo             | 56813                          | (G/C)       |
| 16700       | CakSNP16700    | <i>Kabuli</i>    | Ca_Kabuli_denovo             | 56815                          | (C/G)       |
| 16701       | CakSNP16701    | <i>Kabuli</i>    | Ca_Kabuli_denovo             | 56816                          | (G/A)       |
| 16702       | CakSNP16702    | <i>Kabuli</i>    | Ca_Kabuli_denovo             | 56817                          | (G/A)       |
| 16703       | CakSNP16703    | <i>Kabuli</i>    | Ca_Kabuli_denovo             | 56818                          | (A/G)       |
| 16704       | CakSNP16704    | <i>Kabuli</i>    | Ca_Kabuli_denovo             | 56900                          | (A/G)       |
| 16705       | CakSNP16705    | <i>Kabuli</i>    | Ca_Kabuli_denovo             | 56902                          | (G/A)       |
| 16706       | CakSNP16706    | <i>Kabuli</i>    | Ca_Kabuli_denovo             | 56904                          | (A/T)       |
| 16707       | CakSNP16707    | <i>Kabuli</i>    | Ca_Kabuli_denovo             | 56905                          | (T/G)       |
| 16708       | CakSNP16708    | <i>Kabuli</i>    | Ca_Kabuli_denovo             | 56906                          | (G/C)       |
| 16709       | CakSNP16709    | <i>Kabuli</i>    | Ca_Kabuli_denovo             | 56908                          | (C/G)       |
| 16710       | CakSNP16710    | <i>Kabuli</i>    | Ca_Kabuli_denovo             | 56909                          | (G/A)       |
| 16711       | CakSNP16711    | <i>Kabuli</i>    | Ca_Kabuli_denovo             | 56910                          | (A/G)       |
| 16712       | CakSNP16712    | <i>Kabuli</i>    | Ca_Kabuli_denovo             | 56911                          | (G/A)       |
| 16713       | CakSNP16713    | <i>Kabuli</i>    | Ca_Kabuli_denovo             | 56912                          | (A/C)       |
| 16714       | CakSNP16714    | <i>Kabuli</i>    | Ca_Kabuli_denovo             | 56913                          | (T/C)       |
| 16715       | CakSNP16715    | <i>Kabuli</i>    | Ca_Kabuli_denovo             | 56915                          | (G/C)       |
| 16716       | CakSNP16716    | <i>Kabuli</i>    | Ca_Kabuli_denovo             | 56916                          | (T/A)       |
| 16717       | CakSNP16717    | <i>Kabuli</i>    | Ca_Kabuli_denovo             | 57097                          | (T/G)       |
| 16718       | CakSNP16718    | <i>Kabuli</i>    | Ca_Kabuli_denovo             | 57098                          | (C/A)       |
| 16719       | CakSNP16719    | <i>Kabuli</i>    | Ca_Kabuli_denovo             | 57100                          | (C/T)       |

| <b>S.N.</b> | <b>SNP IDs</b> | <b>Cultivars</b> | <b>Chromosomes/scaffolds</b> | <b>Physical positions (bp)</b> | <b>SNPs</b> |
|-------------|----------------|------------------|------------------------------|--------------------------------|-------------|
| 16720       | CakSNP16720    | <i>Kabuli</i>    | Ca_Kabuli_denovo             | 57101                          | (G/C)       |
| 16721       | CakSNP16721    | <i>Kabuli</i>    | Ca_Kabuli_denovo             | 57170                          | (C/G)       |
| 16722       | CakSNP16722    | <i>Kabuli</i>    | Ca_Kabuli_denovo             | 57172                          | (G/T)       |
| 16723       | CakSNP16723    | <i>Kabuli</i>    | Ca_Kabuli_denovo             | 57174                          | (T/C)       |
| 16724       | CakSNP16724    | <i>Kabuli</i>    | Ca_Kabuli_denovo             | 57175                          | (C/A)       |
| 16725       | CakSNP16725    | <i>Kabuli</i>    | Ca_Kabuli_denovo             | 57176                          | (A/G)       |
| 16726       | CakSNP16726    | <i>Kabuli</i>    | Ca_Kabuli_denovo             | 57177                          | (C/G)       |
| 16727       | CakSNP16727    | <i>Kabuli</i>    | Ca_Kabuli_denovo             | 57178                          | (A/C)       |
| 16728       | CakSNP16728    | <i>Kabuli</i>    | Ca_Kabuli_denovo             | 57193                          | (G/T)       |
| 16729       | CakSNP16729    | <i>Kabuli</i>    | Ca_Kabuli_denovo             | 57194                          | (A/C)       |
| 16730       | CakSNP16730    | <i>Kabuli</i>    | Ca_Kabuli_denovo             | 57195                          | (T/G)       |
| 16731       | CakSNP16731    | <i>Kabuli</i>    | Ca_Kabuli_denovo             | 57196                          | (C/T)       |
| 16732       | CakSNP16732    | <i>Kabuli</i>    | Ca_Kabuli_denovo             | 57271                          | (C/A)       |
| 16733       | CakSNP16733    | <i>Kabuli</i>    | Ca_Kabuli_denovo             | 57272                          | (A/G)       |
| 16734       | CakSNP16734    | <i>Kabuli</i>    | Ca_Kabuli_denovo             | 57275                          | (A/G)       |
| 16735       | CakSNP16735    | <i>Kabuli</i>    | Ca_Kabuli_denovo             | 57276                          | (A/T)       |
| 16736       | CakSNP16736    | <i>Kabuli</i>    | Ca_Kabuli_denovo             | 57277                          | (G/T)       |
| 16737       | CakSNP16737    | <i>Kabuli</i>    | Ca_Kabuli_denovo             | 57278                          | (A/C)       |
| 16738       | CakSNP16738    | <i>Kabuli</i>    | Ca_Kabuli_denovo             | 57280                          | (C/G)       |
| 16739       | CakSNP16739    | <i>Kabuli</i>    | Ca_Kabuli_denovo             | 57281                          | (G/A)       |
| 16740       | CakSNP16740    | <i>Kabuli</i>    | Ca_Kabuli_denovo             | 57282                          | (A/G)       |
| 16741       | CakSNP16741    | <i>Kabuli</i>    | Ca_Kabuli_denovo             | 57283                          | (T/A)       |
| 16742       | CakSNP16742    | <i>Kabuli</i>    | Ca_Kabuli_denovo             | 57285                          | (T/C)       |
| 16743       | CakSNP16743    | <i>Kabuli</i>    | Ca_Kabuli_denovo             | 57286                          | (C/G)       |
| 16744       | CakSNP16744    | <i>Kabuli</i>    | Ca_Kabuli_denovo             | 57287                          | (G/A)       |
| 16745       | CakSNP16745    | <i>Kabuli</i>    | Ca_Kabuli_denovo             | 57289                          | (A/C)       |
| 16746       | CakSNP16746    | <i>Kabuli</i>    | Ca_Kabuli_denovo             | 57955                          | (A/G)       |
| 16747       | CakSNP16747    | <i>Kabuli</i>    | Ca_Kabuli_denovo             | 57990                          | (T/G)       |
| 16748       | CakSNP16748    | <i>Kabuli</i>    | Ca_Kabuli_denovo             | 58026                          | (A/C)       |
| 16749       | CakSNP16749    | <i>Kabuli</i>    | Ca_Kabuli_denovo             | 58029                          | (C/T)       |
| 16750       | CakSNP16750    | <i>Kabuli</i>    | Ca_Kabuli_denovo             | 58031                          | (T/G)       |
| 16751       | CakSNP16751    | <i>Kabuli</i>    | Ca_Kabuli_denovo             | 58032                          | (C/A)       |
| 16752       | CakSNP16752    | <i>Kabuli</i>    | Ca_Kabuli_denovo             | 58033                          | (G/T)       |
| 16753       | CakSNP16753    | <i>Kabuli</i>    | Ca_Kabuli_denovo             | 58046                          | (T/G)       |
| 16754       | CakSNP16754    | <i>Kabuli</i>    | Ca_Kabuli_denovo             | 58761                          | (G/A)       |
| 16755       | CakSNP16755    | <i>Kabuli</i>    | Ca_Kabuli_denovo             | 58763                          | (G/A)       |
| 16756       | CakSNP16756    | <i>Kabuli</i>    | Ca_Kabuli_denovo             | 58765                          | (G/A)       |
| 16757       | CakSNP16757    | <i>Kabuli</i>    | Ca_Kabuli_denovo             | 59113                          | (G/T)       |

| <b>S.N.</b> | <b>SNP IDs</b> | <b>Cultivars</b> | <b>Chromosomes/scaffolds</b> | <b>Physical positions (bp)</b> | <b>SNPs</b> |
|-------------|----------------|------------------|------------------------------|--------------------------------|-------------|
| 16758       | CakSNP16758    | <i>Kabuli</i>    | Ca_Kabuli_denovo             | 60062                          | (C/G)       |
| 16759       | CakSNP16759    | <i>Kabuli</i>    | Ca_Kabuli_denovo             | 60064                          | (T/G)       |
| 16760       | CakSNP16760    | <i>Kabuli</i>    | Ca_Kabuli_denovo             | 60066                          | (C/T)       |
| 16761       | CakSNP16761    | <i>Kabuli</i>    | Ca_Kabuli_denovo             | 60711                          | (G/A)       |
| 16762       | CakSNP16762    | <i>Kabuli</i>    | Ca_Kabuli_denovo             | 60712                          | (A/G)       |
| 16763       | CakSNP16763    | <i>Kabuli</i>    | Ca_Kabuli_denovo             | 62231                          | (G/A)       |
| 16764       | CakSNP16764    | <i>Kabuli</i>    | Ca_Kabuli_denovo             | 62282                          | (G/A)       |
| 16765       | CakSNP16765    | <i>Kabuli</i>    | Ca_Kabuli_denovo             | 62560                          | (G/A)       |
| 16766       | CakSNP16766    | <i>Kabuli</i>    | Ca_Kabuli_denovo             | 62562                          | (G/A)       |
| 16767       | CakSNP16767    | <i>Kabuli</i>    | Ca_Kabuli_denovo             | 63303                          | (C/G)       |
| 16768       | CakSNP16768    | <i>Kabuli</i>    | Ca_Kabuli_denovo             | 63305                          | (T/G)       |
| 16769       | CakSNP16769    | <i>Kabuli</i>    | Ca_Kabuli_denovo             | 63307                          | (C/T)       |
| 16770       | CakSNP16770    | <i>Kabuli</i>    | Ca_Kabuli_denovo             | 64427                          | (T/C)       |
| 16771       | CakSNP16771    | <i>Kabuli</i>    | Ca_Kabuli_denovo             | 64428                          | (T/A)       |
| 16772       | CakSNP16772    | <i>Kabuli</i>    | Ca_Kabuli_denovo             | 64429                          | (G/C)       |
| 16773       | CakSNP16773    | <i>Kabuli</i>    | Ca_Kabuli_denovo             | 64525                          | (C/G)       |
| 16774       | CakSNP16774    | <i>Kabuli</i>    | Ca_Kabuli_denovo             | 64526                          | (G/A)       |
| 16775       | CakSNP16775    | <i>Kabuli</i>    | Ca_Kabuli_denovo             | 66001                          | (G/A)       |
| 16776       | CakSNP16776    | <i>Kabuli</i>    | Ca_Kabuli_denovo             | 66003                          | (G/A)       |
| 16777       | CakSNP16777    | <i>Kabuli</i>    | Ca_Kabuli_denovo             | 66373                          | (G/A)       |
| 16778       | CakSNP16778    | <i>Kabuli</i>    | Ca_Kabuli_denovo             | 67505                          | (A/G)       |
| 16779       | CakSNP16779    | <i>Kabuli</i>    | Ca_Kabuli_denovo             | 67506                          | (C/G)       |
| 16780       | CakSNP16780    | <i>Kabuli</i>    | Ca_Kabuli_denovo             | 67912                          | (G/T)       |
| 16781       | CakSNP16781    | <i>Kabuli</i>    | Ca_Kabuli_denovo             | 68709                          | (G/A)       |
| 16782       | CakSNP16782    | <i>Kabuli</i>    | Ca_Kabuli_denovo             | 68710                          | (C/G)       |
| 16783       | CakSNP16783    | <i>Kabuli</i>    | Ca_Kabuli_denovo             | 68711                          | (A/C)       |
| 16784       | CakSNP16784    | <i>Kabuli</i>    | Ca_Kabuli_denovo             | 68712                          | (A/G)       |
| 16785       | CakSNP16785    | <i>Kabuli</i>    | Ca_Kabuli_denovo             | 68714                          | (G/A)       |
| 16786       | CakSNP16786    | <i>Kabuli</i>    | Ca_Kabuli_denovo             | 68716                          | (A/T)       |
| 16787       | CakSNP16787    | <i>Kabuli</i>    | Ca_Kabuli_denovo             | 69930                          | (C/G)       |
| 16788       | CakSNP16788    | <i>Kabuli</i>    | Ca_Kabuli_denovo             | 69932                          | (G/T)       |
| 16789       | CakSNP16789    | <i>Kabuli</i>    | Ca_Kabuli_denovo             | 69934                          | (C/T)       |
| 16790       | CakSNP16790    | <i>Kabuli</i>    | Ca_Kabuli_denovo             | 69935                          | (A/C)       |
| 16791       | CakSNP16791    | <i>Kabuli</i>    | Ca_Kabuli_denovo             | 69936                          | (G/A)       |
| 16792       | CakSNP16792    | <i>Kabuli</i>    | Ca_Kabuli_denovo             | 69937                          | (C/G)       |
| 16793       | CakSNP16793    | <i>Kabuli</i>    | Ca_Kabuli_denovo             | 71409                          | (G/A)       |
| 16794       | CakSNP16794    | <i>Kabuli</i>    | Ca_Kabuli_denovo             | 71411                          | (G/A)       |
| 16795       | CakSNP16795    | <i>Kabuli</i>    | Ca_Kabuli_denovo             | 72745                          | (G/T)       |

| <b>S.N.</b> | <b>SNP IDs</b> | <b>Cultivars</b> | <b>Chromosomes/scaffolds</b> | <b>Physical positions (bp)</b> | <b>SNPs</b> |
|-------------|----------------|------------------|------------------------------|--------------------------------|-------------|
| 16796       | CakSNP16796    | <i>Kabuli</i>    | Ca_Kabuli_denovo             | 74388                          | (G/C)       |
| 16797       | CakSNP16797    | <i>Kabuli</i>    | Ca_Kabuli_denovo             | 74389                          | (C/G)       |
| 16798       | CakSNP16798    | <i>Kabuli</i>    | Ca_Kabuli_denovo             | 74391                          | (T/G)       |
| 16799       | CakSNP16799    | <i>Kabuli</i>    | Ca_Kabuli_denovo             | 74393                          | (C/T)       |
| 16800       | CakSNP16800    | <i>Kabuli</i>    | Ca_Kabuli_denovo             | 74394                          | (A/C)       |
| 16801       | CakSNP16801    | <i>Kabuli</i>    | Ca_Kabuli_denovo             | 74952                          | (C/G)       |
| 16802       | CakSNP16802    | <i>Kabuli</i>    | Ca_Kabuli_denovo             | 74954                          | (G/T)       |
| 16803       | CakSNP16803    | <i>Kabuli</i>    | Ca_Kabuli_denovo             | 74956                          | (C/T)       |
| 16804       | CakSNP16804    | <i>Kabuli</i>    | Ca_Kabuli_denovo             | 74957                          | (A/C)       |
| 16805       | CakSNP16805    | <i>Kabuli</i>    | Ca_Kabuli_denovo             | 74958                          | (G/A)       |
| 16806       | CakSNP16806    | <i>Kabuli</i>    | Ca_Kabuli_denovo             | 74959                          | (C/G)       |
| 16807       | CakSNP16807    | <i>Kabuli</i>    | Ca_Kabuli_denovo             | 74972                          | (A/G)       |
| 16808       | CakSNP16808    | <i>Kabuli</i>    | Ca_Kabuli_denovo             | 75008                          | (G/A)       |
| 16809       | CakSNP16809    | <i>Kabuli</i>    | Ca_Kabuli_denovo             | 76173                          | (A/G)       |
| 16810       | CakSNP16810    | <i>Kabuli</i>    | Ca_Kabuli_denovo             | 76178                          | (G/A)       |
| 16811       | CakSNP16811    | <i>Kabuli</i>    | Ca_Kabuli_denovo             | 76193                          | (C/G)       |
| 16812       | CakSNP16812    | <i>Kabuli</i>    | Ca_Kabuli_denovo             | 76204                          | (C/G)       |
| 16813       | CakSNP16813    | <i>Kabuli</i>    | Ca_Kabuli_denovo             | 76218                          | (T/G)       |
| 16814       | CakSNP16814    | <i>Kabuli</i>    | Ca_Kabuli_denovo             | 76228                          | (G/C)       |
| 16815       | CakSNP16815    | <i>Kabuli</i>    | Ca_Kabuli_denovo             | 76288                          | (C/T)       |
| 16816       | CakSNP16816    | <i>Kabuli</i>    | Ca_Kabuli_denovo             | 76295                          | (G/T)       |
| 16817       | CakSNP16817    | <i>Kabuli</i>    | Ca_Kabuli_denovo             | 76452                          | (T/A)       |
| 16818       | CakSNP16818    | <i>Kabuli</i>    | Ca_Kabuli_denovo             | 76513                          | (A/G)       |
| 16819       | CakSNP16819    | <i>Kabuli</i>    | Ca_Kabuli_denovo             | 76517                          | (T/C)       |
| 16820       | CakSNP16820    | <i>Kabuli</i>    | Ca_Kabuli_denovo             | 76530                          | (T/G)       |
| 16821       | CakSNP16821    | <i>Kabuli</i>    | Ca_Kabuli_denovo             | 76561                          | (G/T)       |
| 16822       | CakSNP16822    | <i>Kabuli</i>    | Ca_Kabuli_denovo             | 76579                          | (G/A)       |
| 16823       | CakSNP16823    | <i>Kabuli</i>    | Ca_Kabuli_denovo             | 77007                          | (T/A)       |
| 16824       | CakSNP16824    | <i>Kabuli</i>    | Ca_Kabuli_denovo             | 77013                          | (A/T)       |
| 16825       | CakSNP16825    | <i>Kabuli</i>    | Ca_Kabuli_denovo             | 77051                          | (T/A)       |
| 16826       | CakSNP16826    | <i>Kabuli</i>    | Ca_Kabuli_denovo             | 77063                          | (A/G)       |
| 16827       | CakSNP16827    | <i>Kabuli</i>    | Ca_Kabuli_denovo             | 78895                          | (C/T)       |
| 16828       | CakSNP16828    | <i>Kabuli</i>    | Ca_Kabuli_denovo             | 78946                          | (C/T)       |
| 16829       | CakSNP16829    | <i>Kabuli</i>    | Ca_Kabuli_denovo             | 79307                          | (T/A)       |
| 16830       | CakSNP16830    | <i>Kabuli</i>    | Ca_Kabuli_denovo             | 79308                          | (T/G)       |
| 16831       | CakSNP16831    | <i>Kabuli</i>    | Ca_Kabuli_denovo             | 79309                          | (C/G)       |
| 16832       | CakSNP16832    | <i>Kabuli</i>    | Ca_Kabuli_denovo             | 79311                          | (A/G)       |
| 16833       | CakSNP16833    | <i>Kabuli</i>    | Ca_Kabuli_denovo             | 79312                          | (T/C)       |

| <b>S.N.</b> | <b>SNP IDs</b> | <b>Cultivars</b> | <b>Chromosomes/scaffolds</b> | <b>Physical positions (bp)</b> | <b>SNPs</b> |
|-------------|----------------|------------------|------------------------------|--------------------------------|-------------|
| 16834       | CakSNP16834    | <i>Kabuli</i>    | Ca_Kabuli_denovo             | 79313                          | (G/A)       |
| 16835       | CakSNP16835    | <i>Kabuli</i>    | Ca_Kabuli_denovo             | 83072                          | (C/T)       |
| 16836       | CakSNP16836    | <i>Kabuli</i>    | Ca_Kabuli_denovo             | 83103                          | (C/G)       |
| 16837       | CakSNP16837    | <i>Kabuli</i>    | Ca_Kabuli_denovo             | 83773                          | (C/G)       |
| 16838       | CakSNP16838    | <i>Kabuli</i>    | Ca_Kabuli_denovo             | 83775                          | (A/G)       |
| 16839       | CakSNP16839    | <i>Kabuli</i>    | Ca_Kabuli_denovo             | 83776                          | (T/C)       |
| 16840       | CakSNP16840    | <i>Kabuli</i>    | Ca_Kabuli_denovo             | 83777                          | (G/A)       |
| 16841       | CakSNP16841    | <i>Kabuli</i>    | Ca_Kabuli_denovo             | 83885                          | (A/C)       |
| 16842       | CakSNP16842    | <i>Kabuli</i>    | Ca_Kabuli_denovo             | 84999                          | (T/G)       |
| 16843       | CakSNP16843    | <i>Kabuli</i>    | Ca_Kabuli_denovo             | 85000                          | (G/A)       |
| 16844       | CakSNP16844    | <i>Kabuli</i>    | Ca_Kabuli_denovo             | 85001                          | (C/G)       |
| 16845       | CakSNP16845    | <i>Kabuli</i>    | Ca_Kabuli_denovo             | 85003                          | (G/C)       |
| 16846       | CakSNP16846    | <i>Kabuli</i>    | Ca_Kabuli_denovo             | 89165                          | (G/A)       |
| 16847       | CakSNP16847    | <i>Kabuli</i>    | Ca_Kabuli_denovo             | 89167                          | (G/A)       |
| 16848       | CakSNP16848    | <i>Kabuli</i>    | Ca_Kabuli_denovo             | 89731                          | (C/G)       |
| 16849       | CakSNP16849    | <i>Kabuli</i>    | Ca_Kabuli_denovo             | 89733                          | (A/G)       |
| 16850       | CakSNP16850    | <i>Kabuli</i>    | Ca_Kabuli_denovo             | 89829                          | (G/A)       |
| 16851       | CakSNP16851    | <i>Kabuli</i>    | Ca_Kabuli_denovo             | 89830                          | (G/A)       |
| 16852       | CakSNP16852    | <i>Kabuli</i>    | Ca_Kabuli_denovo             | 90103                          | (G/A)       |
| 16853       | CakSNP16853    | <i>Kabuli</i>    | Ca_Kabuli_denovo             | 90105                          | (G/A)       |
| 16854       | CakSNP16854    | <i>Kabuli</i>    | Ca_Kabuli_denovo             | 90106                          | (A/G)       |
| 16855       | CakSNP16855    | <i>Kabuli</i>    | Ca_Kabuli_denovo             | 90209                          | (A/C)       |
| 16856       | CakSNP16856    | <i>Kabuli</i>    | Ca_Kabuli_denovo             | 90210                          | (G/T)       |
| 16857       | CakSNP16857    | <i>Kabuli</i>    | Ca_Kabuli_denovo             | 90211                          | (A/G)       |
| 16858       | CakSNP16858    | <i>Kabuli</i>    | Ca_Kabuli_denovo             | 90488                          | (A/C)       |
| 16859       | CakSNP16859    | <i>Kabuli</i>    | Ca_Kabuli_denovo             | 92231                          | (G/A)       |
| 16860       | CakSNP16860    | <i>Kabuli</i>    | Ca_Kabuli_denovo             | 92233                          | (G/A)       |
| 16861       | CakSNP16861    | <i>Kabuli</i>    | Ca_Kabuli_denovo             | 92989                          | (T/A)       |
| 16862       | CakSNP16862    | <i>Kabuli</i>    | Ca_Kabuli_denovo             | 92990                          | (G/T)       |
| 16863       | CakSNP16863    | <i>Kabuli</i>    | Ca_Kabuli_denovo             | 94682                          | (G/A)       |
| 16864       | CakSNP16864    | <i>Kabuli</i>    | Ca_Kabuli_denovo             | 94731                          | (G/A)       |
| 16865       | CakSNP16865    | <i>Kabuli</i>    | Ca_Kabuli_denovo             | 96656                          | (C/T)       |
| 16866       | CakSNP16866    | <i>Kabuli</i>    | Ca_Kabuli_denovo             | 96658                          | (A/C)       |
| 16867       | CakSNP16867    | <i>Kabuli</i>    | Ca_Kabuli_denovo             | 96660                          | (G/A)       |
| 16868       | CakSNP16868    | <i>Kabuli</i>    | Ca_Kabuli_denovo             | 96989                          | (A/G)       |
| 16869       | CakSNP16869    | <i>Kabuli</i>    | Ca_Kabuli_denovo             | 96991                          | (A/G)       |
| 16870       | CakSNP16870    | <i>Kabuli</i>    | Ca_Kabuli_denovo             | 96993                          | (T/A)       |
| 16871       | CakSNP16871    | <i>Kabuli</i>    | Ca_Kabuli_denovo             | 96994                          | (G/T)       |

| <b>S.N.</b> | <b>SNP IDs</b> | <b>Cultivars</b> | <b>Chromosomes/scaffolds</b> | <b>Physical positions (bp)</b> | <b>SNPs</b> |
|-------------|----------------|------------------|------------------------------|--------------------------------|-------------|
| 16872       | CakSNP16872    | <i>Kabuli</i>    | Ca_Kabuli_denovo             | 96995                          | (C/G)       |
| 16873       | CakSNP16873    | <i>Kabuli</i>    | Ca_Kabuli_denovo             | 98504                          | (A/G)       |
| 16874       | CakSNP16874    | <i>Kabuli</i>    | Ca_Kabuli_denovo             | 98519                          | (A/G)       |
| 16875       | CakSNP16875    | <i>Kabuli</i>    | Ca_Kabuli_denovo             | 98520                          | (A/G)       |
| 16876       | CakSNP16876    | <i>Kabuli</i>    | Ca_Kabuli_denovo             | 98532                          | (G/A)       |
| 16877       | CakSNP16877    | <i>Kabuli</i>    | Ca_Kabuli_denovo             | 98534                          | (C/G)       |
| 16878       | CakSNP16878    | <i>Kabuli</i>    | Ca_Kabuli_denovo             | 98536                          | (C/G)       |
| 16879       | CakSNP16879    | <i>Kabuli</i>    | Ca_Kabuli_denovo             | 98537                          | (A/G)       |
| 16880       | CakSNP16880    | <i>Kabuli</i>    | Ca_Kabuli_denovo             | 98550                          | (A/C)       |
| 16881       | CakSNP16881    | <i>Kabuli</i>    | Ca_Kabuli_denovo             | 98564                          | (A/G)       |
| 16882       | CakSNP16882    | <i>Kabuli</i>    | Ca_Kabuli_denovo             | 98567                          | (A/G)       |
| 16883       | CakSNP16883    | <i>Kabuli</i>    | Ca_Kabuli_denovo             | 98874                          | (T/A)       |
| 16884       | CakSNP16884    | <i>Kabuli</i>    | Ca_Kabuli_denovo             | 98885                          | (T/C)       |
| 16885       | CakSNP16885    | <i>Kabuli</i>    | Ca_Kabuli_denovo             | 98887                          | (T/C)       |
| 16886       | CakSNP16886    | <i>Kabuli</i>    | Ca_Kabuli_denovo             | 98913                          | (G/T)       |
| 16887       | CakSNP16887    | <i>Kabuli</i>    | Ca_Kabuli_denovo             | 99120                          | (T/C)       |
| 16888       | CakSNP16888    | <i>Kabuli</i>    | Ca_Kabuli_denovo             | 99137                          | (A/G)       |
| 16889       | CakSNP16889    | <i>Kabuli</i>    | Ca_Kabuli_denovo             | 99210                          | (C/G)       |
| 16890       | CakSNP16890    | <i>Kabuli</i>    | Ca_Kabuli_denovo             | 99212                          | (T/G)       |
| 16891       | CakSNP16891    | <i>Kabuli</i>    | Ca_Kabuli_denovo             | 99214                          | (C/T)       |
| 16892       | CakSNP16892    | <i>Kabuli</i>    | Ca_Kabuli_denovo             | 99215                          | (A/C)       |
| 16893       | CakSNP16893    | <i>Kabuli</i>    | Ca_Kabuli_denovo             | 99985                          | (A/G)       |
| 16894       | CakSNP16894    | <i>Kabuli</i>    | Ca_Kabuli_denovo             | 99996                          | (A/G)       |
| 16895       | CakSNP16895    | <i>Kabuli</i>    | Ca_Kabuli_denovo             | 99997                          | (A/G)       |
| 16896       | CakSNP16896    | <i>Kabuli</i>    | Ca_Kabuli_denovo             | 100026                         | (C/G)       |
| 16897       | CakSNP16897    | <i>Kabuli</i>    | Ca_Kabuli_denovo             | 100032                         | (A/G)       |
| 16898       | CakSNP16898    | <i>Kabuli</i>    | Ca_Kabuli_denovo             | 100035                         | (A/T)       |
| 16899       | CakSNP16899    | <i>Kabuli</i>    | Ca_Kabuli_denovo             | 100038                         | (C/G)       |
| 16900       | CakSNP16900    | <i>Kabuli</i>    | Ca_Kabuli_denovo             | 100039                         | (C/G)       |
| 16901       | CakSNP16901    | <i>Kabuli</i>    | Ca_Kabuli_denovo             | 100051                         | (A/G)       |
| 16902       | CakSNP16902    | <i>Kabuli</i>    | Ca_Kabuli_denovo             | 100054                         | (A/G)       |
| 16903       | CakSNP16903    | <i>Kabuli</i>    | Ca_Kabuli_denovo             | 100063                         | (A/G)       |
| 16904       | CakSNP16904    | <i>Kabuli</i>    | Ca_Kabuli_denovo             | 101348                         | (T/G)       |
| 16905       | CakSNP16905    | <i>Kabuli</i>    | Ca_Kabuli_denovo             | 101357                         | (A/G)       |
| 16906       | CakSNP16906    | <i>Kabuli</i>    | Ca_Kabuli_denovo             | 101358                         | (A/C)       |
| 16907       | CakSNP16907    | <i>Kabuli</i>    | Ca_Kabuli_denovo             | 101359                         | (T/C)       |
| 16908       | CakSNP16908    | <i>Kabuli</i>    | Ca_Kabuli_denovo             | 101361                         | (A/C)       |
| 16909       | CakSNP16909    | <i>Kabuli</i>    | Ca_Kabuli_denovo             | 101362                         | (G/C)       |

| <b>S.N.</b> | <b>SNP IDs</b> | <b>Cultivars</b> | <b>Chromosomes/scaffolds</b> | <b>Physical positions (bp)</b> | <b>SNPs</b> |
|-------------|----------------|------------------|------------------------------|--------------------------------|-------------|
| 16910       | CakSNP16910    | <i>Kabuli</i>    | Ca_Kabuli_denovo             | 101363                         | (A/G)       |
| 16911       | CakSNP16911    | <i>Kabuli</i>    | Ca_Kabuli_denovo             | 101364                         | (C/A)       |
| 16912       | CakSNP16912    | <i>Kabuli</i>    | Ca_Kabuli_denovo             | 101367                         | (A/C)       |
| 16913       | CakSNP16913    | <i>Kabuli</i>    | Ca_Kabuli_denovo             | 101371                         | (C/T)       |
| 16914       | CakSNP16914    | <i>Kabuli</i>    | Ca_Kabuli_denovo             | 101919                         | (C/A)       |
| 16915       | CakSNP16915    | <i>Kabuli</i>    | Ca_Kabuli_denovo             | 101920                         | (C/T)       |
| 16916       | CakSNP16916    | <i>Kabuli</i>    | Ca_Kabuli_denovo             | 101921                         | (G/C)       |
| 16917       | CakSNP16917    | <i>Kabuli</i>    | Ca_Kabuli_denovo             | 102039                         | (A/G)       |
| 16918       | CakSNP16918    | <i>Kabuli</i>    | Ca_Kabuli_denovo             | 102047                         | (G/A)       |
| 16919       | CakSNP16919    | <i>Kabuli</i>    | Ca_Kabuli_denovo             | 102091                         | (A/C)       |
| 16920       | CakSNP16920    | <i>Kabuli</i>    | Ca_Kabuli_denovo             | 102099                         | (C/T)       |
| 16921       | CakSNP16921    | <i>Kabuli</i>    | Ca_Kabuli_denovo             | 102171                         | (G/A)       |
| 16922       | CakSNP16922    | <i>Kabuli</i>    | Ca_Kabuli_denovo             | 102173                         | (G/A)       |
| 16923       | CakSNP16923    | <i>Kabuli</i>    | Ca_Kabuli_denovo             | 105285                         | (C/G)       |
| 16924       | CakSNP16924    | <i>Kabuli</i>    | Ca_Kabuli_denovo             | 105303                         | (C/G)       |
| 16925       | CakSNP16925    | <i>Kabuli</i>    | Ca_Kabuli_denovo             | 105305                         | (T/C)       |
| 16926       | CakSNP16926    | <i>Kabuli</i>    | Ca_Kabuli_denovo             | 105319                         | (G/T)       |
| 16927       | CakSNP16927    | <i>Kabuli</i>    | Ca_Kabuli_denovo             | 105320                         | (T/G)       |
| 16928       | CakSNP16928    | <i>Kabuli</i>    | Ca_Kabuli_denovo             | 105321                         | (C/A)       |
| 16929       | CakSNP16929    | <i>Kabuli</i>    | Ca_Kabuli_denovo             | 105326                         | (T/G)       |
| 16930       | CakSNP16930    | <i>Kabuli</i>    | Ca_Kabuli_denovo             | 105336                         | (A/G)       |
| 16931       | CakSNP16931    | <i>Kabuli</i>    | Ca_Kabuli_denovo             | 105339                         | (C/G)       |
| 16932       | CakSNP16932    | <i>Kabuli</i>    | Ca_Kabuli_denovo             | 105790                         | (G/T)       |
| 16933       | CakSNP16933    | <i>Kabuli</i>    | Ca_Kabuli_denovo             | 105792                         | (T/C)       |
| 16934       | CakSNP16934    | <i>Kabuli</i>    | Ca_Kabuli_denovo             | 105795                         | (A/C)       |
| 16935       | CakSNP16935    | <i>Kabuli</i>    | Ca_Kabuli_denovo             | 105819                         | (G/T)       |
| 16936       | CakSNP16936    | <i>Kabuli</i>    | Ca_Kabuli_denovo             | 106278                         | (A/G)       |
| 16937       | CakSNP16937    | <i>Kabuli</i>    | Ca_Kabuli_denovo             | 106280                         | (C/G)       |
| 16938       | CakSNP16938    | <i>Kabuli</i>    | Ca_Kabuli_denovo             | 106282                         | (T/G)       |
| 16939       | CakSNP16939    | <i>Kabuli</i>    | Ca_Kabuli_denovo             | 106284                         | (C/T)       |
| 16940       | CakSNP16940    | <i>Kabuli</i>    | Ca_Kabuli_denovo             | 107119                         | (C/G)       |
| 16941       | CakSNP16941    | <i>Kabuli</i>    | Ca_Kabuli_denovo             | 107120                         | (A/C)       |
| 16942       | CakSNP16942    | <i>Kabuli</i>    | Ca_Kabuli_denovo             | 107121                         | (G/C)       |
| 16943       | CakSNP16943    | <i>Kabuli</i>    | Ca_Kabuli_denovo             | 107124                         | (G/A)       |
| 16944       | CakSNP16944    | <i>Kabuli</i>    | Ca_Kabuli_denovo             | 107125                         | (A/T)       |
| 16945       | CakSNP16945    | <i>Kabuli</i>    | Ca_Kabuli_denovo             | 110466                         | (G/A)       |
| 16946       | CakSNP16946    | <i>Kabuli</i>    | Ca_Kabuli_denovo             | 110468                         | (G/A)       |
| 16947       | CakSNP16947    | <i>Kabuli</i>    | Ca_Kabuli_denovo             | 111292                         | (C/G)       |



| <b>S.N.</b> | <b>SNP IDs</b> | <b>Cultivars</b> | <b>Chromosomes/scaffolds</b> | <b>Physical positions (bp)</b> | <b>SNPs</b> |
|-------------|----------------|------------------|------------------------------|--------------------------------|-------------|
| 16948       | CakSNP16948    | <i>Kabuli</i>    | Ca_Kabuli_denovo             | 111294                         | (T/G)       |
| 16949       | CakSNP16949    | <i>Kabuli</i>    | Ca_Kabuli_denovo             | 111296                         | (C/T)       |
| 16950       | CakSNP16950    | <i>Kabuli</i>    | Ca_Kabuli_denovo             | 115118                         | (A/C)       |
| 16951       | CakSNP16951    | <i>Kabuli</i>    | Ca_Kabuli_denovo             | 115119                         | (G/C)       |
| 16952       | CakSNP16952    | <i>Kabuli</i>    | Ca_Kabuli_denovo             | 115122                         | (G/A)       |
| 16953       | CakSNP16953    | <i>Kabuli</i>    | Ca_Kabuli_denovo             | 115123                         | (A/T)       |
| 16954       | CakSNP16954    | <i>Kabuli</i>    | Ca_Kabuli_denovo             | 115219                         | (G/C)       |
| 16955       | CakSNP16955    | <i>Kabuli</i>    | Ca_Kabuli_denovo             | 115220                         | (A/G)       |
| 16956       | CakSNP16956    | <i>Kabuli</i>    | Ca_Kabuli_denovo             | 115768                         | (C/A)       |
| 16957       | CakSNP16957    | <i>Kabuli</i>    | Ca_Kabuli_denovo             | 115769                         | (T/A)       |
| 16958       | CakSNP16958    | <i>Kabuli</i>    | Ca_Kabuli_denovo             | 115771                         | (C/G)       |
| 16959       | CakSNP16959    | <i>Kabuli</i>    | Ca_Kabuli_denovo             | 116794                         | (G/A)       |
| 16960       | CakSNP16960    | <i>Kabuli</i>    | Ca_Kabuli_denovo             | 116795                         | (A/T)       |
| 16961       | CakSNP16961    | <i>Kabuli</i>    | Ca_Kabuli_denovo             | 116796                         | (G/A)       |
| 16962       | CakSNP16962    | <i>Kabuli</i>    | Ca_Kabuli_denovo             | 116797                         | (C/T)       |
| 16963       | CakSNP16963    | <i>Kabuli</i>    | Ca_Kabuli_denovo             | 116798                         | (C/G)       |
| 16964       | CakSNP16964    | <i>Kabuli</i>    | Ca_Kabuli_denovo             | 116954                         | (A/G)       |
| 16965       | CakSNP16965    | <i>Kabuli</i>    | Ca_Kabuli_denovo             | 117155                         | (A/G)       |
| 16966       | CakSNP16966    | <i>Kabuli</i>    | Ca_Kabuli_denovo             | 117163                         | (T/C)       |
| 16967       | CakSNP16967    | <i>Kabuli</i>    | Ca_Kabuli_denovo             | 117344                         | (T/C)       |
| 16968       | CakSNP16968    | <i>Kabuli</i>    | Ca_Kabuli_denovo             | 117345                         | (T/A)       |
| 16969       | CakSNP16969    | <i>Kabuli</i>    | Ca_Kabuli_denovo             | 117346                         | (G/C)       |
| 16970       | CakSNP16970    | <i>Kabuli</i>    | Ca_Kabuli_denovo             | 117347                         | (G/A)       |
| 16971       | CakSNP16971    | <i>Kabuli</i>    | Ca_Kabuli_denovo             | 117802                         | (A/G)       |
| 16972       | CakSNP16972    | <i>Kabuli</i>    | Ca_Kabuli_denovo             | 117804                         | (A/G)       |
| 16973       | CakSNP16973    | <i>Kabuli</i>    | Ca_Kabuli_denovo             | 117806                         | (T/C)       |
| 16974       | CakSNP16974    | <i>Kabuli</i>    | Ca_Kabuli_denovo             | 117807                         | (T/G)       |
| 16975       | CakSNP16975    | <i>Kabuli</i>    | Ca_Kabuli_denovo             | 117901                         | (G/C)       |
| 16976       | CakSNP16976    | <i>Kabuli</i>    | Ca_Kabuli_denovo             | 117996                         | (T/G)       |
| 16977       | CakSNP16977    | <i>Kabuli</i>    | Ca_Kabuli_denovo             | 118000                         | (G/C)       |
| 16978       | CakSNP16978    | <i>Kabuli</i>    | Ca_Kabuli_denovo             | 118002                         | (A/G)       |
| 16979       | CakSNP16979    | <i>Kabuli</i>    | Ca_Kabuli_denovo             | 119682                         | (C/G)       |
| 16980       | CakSNP16980    | <i>Kabuli</i>    | Ca_Kabuli_denovo             | 119765                         | (A/G)       |
| 16981       | CakSNP16981    | <i>Kabuli</i>    | Ca_Kabuli_denovo             | 119767                         | (A/C)       |
| 16982       | CakSNP16982    | <i>Kabuli</i>    | Ca_Kabuli_denovo             | 122783                         | (T/C)       |
| 16983       | CakSNP16983    | <i>Kabuli</i>    | Ca_Kabuli_denovo             | 122839                         | (T/G)       |
| 16984       | CakSNP16984    | <i>Kabuli</i>    | Ca_Kabuli_denovo             | 124009                         | (G/T)       |
| 16985       | CakSNP16985    | <i>Kabuli</i>    | Ca_Kabuli_denovo             | 124031                         | (A/G)       |

| <b>S.N.</b> | <b>SNP IDs</b> | <b>Cultivars</b> | <b>Chromosomes/scaffolds</b> | <b>Physical positions (bp)</b> | <b>SNPs</b> |
|-------------|----------------|------------------|------------------------------|--------------------------------|-------------|
| 16986       | CakSNP16986    | <i>Kabuli</i>    | Ca_Kabuli_denovo             | 124227                         | (G/T)       |
| 16987       | CakSNP16987    | <i>Kabuli</i>    | Ca_Kabuli_denovo             | 124274                         | (G/A)       |
| 16988       | CakSNP16988    | <i>Kabuli</i>    | Ca_Kabuli_denovo             | 124738                         | (T/A)       |
| 16989       | CakSNP16989    | <i>Kabuli</i>    | Ca_Kabuli_denovo             | 124751                         | (T/A)       |
| 16990       | CakSNP16990    | <i>Kabuli</i>    | Ca_Kabuli_denovo             | 124772                         | (C/G)       |
| 16991       | CakSNP16991    | <i>Kabuli</i>    | Ca_Kabuli_denovo             | 124780                         | (A/G)       |
| 16992       | CakSNP16992    | <i>Kabuli</i>    | Ca_Kabuli_denovo             | 125616                         | (A/G)       |
| 16993       | CakSNP16993    | <i>Kabuli</i>    | Ca_Kabuli_denovo             | 125617                         | (T/G)       |
| 16994       | CakSNP16994    | <i>Kabuli</i>    | Ca_Kabuli_denovo             | 125618                         | (T/C)       |
| 16995       | CakSNP16995    | <i>Kabuli</i>    | Ca_Kabuli_denovo             | 127024                         | (A/G)       |
| 16996       | CakSNP16996    | <i>Kabuli</i>    | Ca_Kabuli_denovo             | 127401                         | (T/G)       |
| 16997       | CakSNP16997    | <i>Kabuli</i>    | Ca_Kabuli_denovo             | 127409                         | (G/T)       |
| 16998       | CakSNP16998    | <i>Kabuli</i>    | Ca_Kabuli_denovo             | 127410                         | (G/T)       |
| 16999       | CakSNP16999    | <i>Kabuli</i>    | Ca_Kabuli_denovo             | 127411                         | (G/C)       |
| 17000       | CakSNP17000    | <i>Kabuli</i>    | Ca_Kabuli_denovo             | 127493                         | (A/G)       |
| 17001       | CakSNP17001    | <i>Kabuli</i>    | Ca_Kabuli_denovo             | 127494                         | (A/G)       |
| 17002       | CakSNP17002    | <i>Kabuli</i>    | Ca_Kabuli_denovo             | 129540                         | (A/C)       |
| 17003       | CakSNP17003    | <i>Kabuli</i>    | Ca_Kabuli_denovo             | 129899                         | (T/G)       |
| 17004       | CakSNP17004    | <i>Kabuli</i>    | Ca_Kabuli_denovo             | 129902                         | (A/C)       |
| 17005       | CakSNP17005    | <i>Kabuli</i>    | Ca_Kabuli_denovo             | 129903                         | (G/A)       |
| 17006       | CakSNP17006    | <i>Kabuli</i>    | Ca_Kabuli_denovo             | 129904                         | (C/G)       |
| 17007       | CakSNP17007    | <i>Kabuli</i>    | Ca_Kabuli_denovo             | 129905                         | (C/A)       |
| 17008       | CakSNP17008    | <i>Kabuli</i>    | Ca_Kabuli_denovo             | 129906                         | (A/G)       |
| 17009       | CakSNP17009    | <i>Kabuli</i>    | Ca_Kabuli_denovo             | 129908                         | (G/A)       |
| 17010       | CakSNP17010    | <i>Kabuli</i>    | Ca_Kabuli_denovo             | 130839                         | (A/C)       |
| 17011       | CakSNP17011    | <i>Kabuli</i>    | Ca_Kabuli_denovo             | 130840                         | (T/G)       |
| 17012       | CakSNP17012    | <i>Kabuli</i>    | Ca_Kabuli_denovo             | 130841                         | (G/A)       |
| 17013       | CakSNP17013    | <i>Kabuli</i>    | Ca_Kabuli_denovo             | 130842                         | (C/T)       |
| 17014       | CakSNP17014    | <i>Kabuli</i>    | Ca_Kabuli_denovo             | 133633                         | (A/G)       |
| 17015       | CakSNP17015    | <i>Kabuli</i>    | Ca_Kabuli_denovo             | 133634                         | (A/G)       |
| 17016       | CakSNP17016    | <i>Kabuli</i>    | Ca_Kabuli_denovo             | 136132                         | (G/A)       |
| 17017       | CakSNP17017    | <i>Kabuli</i>    | Ca_Kabuli_denovo             | 136134                         | (G/A)       |
| 17018       | CakSNP17018    | <i>Kabuli</i>    | Ca_Kabuli_denovo             | 138972                         | (A/G)       |
| 17019       | CakSNP17019    | <i>Kabuli</i>    | Ca_Kabuli_denovo             | 139763                         | (T/G)       |
| 17020       | CakSNP17020    | <i>Kabuli</i>    | Ca_Kabuli_denovo             | 139764                         | (G/C)       |
| 17021       | CakSNP17021    | <i>Kabuli</i>    | Ca_Kabuli_denovo             | 140441                         | (G/T)       |
| 17022       | CakSNP17022    | <i>Kabuli</i>    | Ca_Kabuli_denovo             | 140457                         | (T/G)       |
| 17023       | CakSNP17023    | <i>Kabuli</i>    | Ca_Kabuli_denovo             | 140481                         | (A/G)       |

| <b>S.N.</b> | <b>SNP IDs</b> | <b>Cultivars</b> | <b>Chromosomes/scaffolds</b> | <b>Physical positions (bp)</b> | <b>SNPs</b> |
|-------------|----------------|------------------|------------------------------|--------------------------------|-------------|
| 17024       | CakSNP17024    | <i>Kabuli</i>    | Ca_Kabuli_denovo             | 143491                         | (C/G)       |
| 17025       | CakSNP17025    | <i>Kabuli</i>    | Ca_Kabuli_denovo             | 143493                         | (T/G)       |
| 17026       | CakSNP17026    | <i>Kabuli</i>    | Ca_Kabuli_denovo             | 143495                         | (C/T)       |
| 17027       | CakSNP17027    | <i>Kabuli</i>    | Ca_Kabuli_denovo             | 143496                         | (A/C)       |
| 17028       | CakSNP17028    | <i>Kabuli</i>    | Ca_Kabuli_denovo             | 143497                         | (G/A)       |
| 17029       | CakSNP17029    | <i>Kabuli</i>    | Ca_Kabuli_denovo             | 146274                         | (G/A)       |
| 17030       | CakSNP17030    | <i>Kabuli</i>    | Ca_Kabuli_denovo             | 146364                         | (A/G)       |
| 17031       | CakSNP17031    | <i>Kabuli</i>    | Ca_Kabuli_denovo             | 146747                         | (A/G)       |
| 17032       | CakSNP17032    | <i>Kabuli</i>    | Ca_Kabuli_denovo             | 146749                         | (G/A)       |
| 17033       | CakSNP17033    | <i>Kabuli</i>    | Ca_Kabuli_denovo             | 146751                         | (T/A)       |
| 17034       | CakSNP17034    | <i>Kabuli</i>    | Ca_Kabuli_denovo             | 146753                         | (C/G)       |
| 17035       | CakSNP17035    | <i>Kabuli</i>    | Ca_Kabuli_denovo             | 146755                         | (G/C)       |
| 17036       | CakSNP17036    | <i>Kabuli</i>    | Ca_Kabuli_denovo             | 147027                         | (A/G)       |
| 17037       | CakSNP17037    | <i>Kabuli</i>    | Ca_Kabuli_denovo             | 147029                         | (A/G)       |
| 17038       | CakSNP17038    | <i>Kabuli</i>    | Ca_Kabuli_denovo             | 147031                         | (A/T)       |
| 17039       | CakSNP17039    | <i>Kabuli</i>    | Ca_Kabuli_denovo             | 147032                         | (G/T)       |
| 17040       | CakSNP17040    | <i>Kabuli</i>    | Ca_Kabuli_denovo             | 147033                         | (C/G)       |
| 17041       | CakSNP17041    | <i>Kabuli</i>    | Ca_Kabuli_denovo             | 149439                         | (A/C)       |
| 17042       | CakSNP17042    | <i>Kabuli</i>    | Ca_Kabuli_denovo             | 149440                         | (G/T)       |
| 17043       | CakSNP17043    | <i>Kabuli</i>    | Ca_Kabuli_denovo             | 149628                         | (C/G)       |
| 17044       | CakSNP17044    | <i>Kabuli</i>    | Ca_Kabuli_denovo             | 149629                         | (C/A)       |
| 17045       | CakSNP17045    | <i>Kabuli</i>    | Ca_Kabuli_denovo             | 149632                         | (C/G)       |
| 17046       | CakSNP17046    | <i>Kabuli</i>    | Ca_Kabuli_denovo             | 149809                         | (A/G)       |
| 17047       | CakSNP17047    | <i>Kabuli</i>    | Ca_Kabuli_denovo             | 149811                         | (A/G)       |
| 17048       | CakSNP17048    | <i>Kabuli</i>    | Ca_Kabuli_denovo             | 149813                         | (T/A)       |
| 17049       | CakSNP17049    | <i>Kabuli</i>    | Ca_Kabuli_denovo             | 150092                         | (A/G)       |
| 17050       | CakSNP17050    | <i>Kabuli</i>    | Ca_Kabuli_denovo             | 150094                         | (G/A)       |
| 17051       | CakSNP17051    | <i>Kabuli</i>    | Ca_Kabuli_denovo             | 150096                         | (T/A)       |
| 17052       | CakSNP17052    | <i>Kabuli</i>    | Ca_Kabuli_denovo             | 150097                         | (G/T)       |
| 17053       | CakSNP17053    | <i>Kabuli</i>    | Ca_Kabuli_denovo             | 150098                         | (C/G)       |
| 17054       | CakSNP17054    | <i>Kabuli</i>    | Ca_Kabuli_denovo             | 150669                         | (A/G)       |
| 17055       | CakSNP17055    | <i>Kabuli</i>    | Ca_Kabuli_denovo             | 150688                         | (T/G)       |
| 17056       | CakSNP17056    | <i>Kabuli</i>    | Ca_Kabuli_denovo             | 150703                         | (A/G)       |
| 17057       | CakSNP17057    | <i>Kabuli</i>    | Ca_Kabuli_denovo             | 150706                         | (T/A)       |
| 17058       | CakSNP17058    | <i>Kabuli</i>    | Ca_Kabuli_denovo             | 150720                         | (A/G)       |
| 17059       | CakSNP17059    | <i>Kabuli</i>    | Ca_Kabuli_denovo             | 150730                         | (A/G)       |
| 17060       | CakSNP17060    | <i>Kabuli</i>    | Ca_Kabuli_denovo             | 150734                         | (G/A)       |
| 17061       | CakSNP17061    | <i>Kabuli</i>    | Ca_Kabuli_denovo             | 153852                         | (A/G)       |

| <b>S.N.</b> | <b>SNP IDs</b> | <b>Cultivars</b> | <b>Chromosomes/scaffolds</b> | <b>Physical positions (bp)</b> | <b>SNPs</b> |
|-------------|----------------|------------------|------------------------------|--------------------------------|-------------|
| 17062       | CakSNP17062    | <i>Kabuli</i>    | Ca_Kabuli_denovo             | 154095                         | (C/G)       |
| 17063       | CakSNP17063    | <i>Kabuli</i>    | Ca_Kabuli_denovo             | 154096                         | (G/A)       |
| 17064       | CakSNP17064    | <i>Kabuli</i>    | Ca_Kabuli_denovo             | 154097                         | (T/A)       |
| 17065       | CakSNP17065    | <i>Kabuli</i>    | Ca_Kabuli_denovo             | 154098                         | (C/T)       |
| 17066       | CakSNP17066    | <i>Kabuli</i>    | Ca_Kabuli_denovo             | 154640                         | (G/A)       |
| 17067       | CakSNP17067    | <i>Kabuli</i>    | Ca_Kabuli_denovo             | 155679                         | (A/G)       |
| 17068       | CakSNP17068    | <i>Kabuli</i>    | Ca_Kabuli_denovo             | 155681                         | (A/G)       |
| 17069       | CakSNP17069    | <i>Kabuli</i>    | Ca_Kabuli_denovo             | 155683                         | (A/T)       |
| 17070       | CakSNP17070    | <i>Kabuli</i>    | Ca_Kabuli_denovo             | 156229                         | (A/G)       |
| 17071       | CakSNP17071    | <i>Kabuli</i>    | Ca_Kabuli_denovo             | 156322                         | (T/G)       |
| 17072       | CakSNP17072    | <i>Kabuli</i>    | Ca_Kabuli_denovo             | 156323                         | (G/A)       |
| 17073       | CakSNP17073    | <i>Kabuli</i>    | Ca_Kabuli_denovo             | 156324                         | (C/G)       |
| 17074       | CakSNP17074    | <i>Kabuli</i>    | Ca_Kabuli_denovo             | 156325                         | (A/C)       |
| 17075       | CakSNP17075    | <i>Kabuli</i>    | Ca_Kabuli_denovo             | 156492                         | (A/G)       |
| 17076       | CakSNP17076    | <i>Kabuli</i>    | Ca_Kabuli_denovo             | 156493                         | (G/A)       |
| 17077       | CakSNP17077    | <i>Kabuli</i>    | Ca_Kabuli_denovo             | 156494                         | (C/G)       |
| 17078       | CakSNP17078    | <i>Kabuli</i>    | Ca_Kabuli_denovo             | 157819                         | (C/G)       |
| 17079       | CakSNP17079    | <i>Kabuli</i>    | Ca_Kabuli_denovo             | 157821                         | (G/A)       |
| 17080       | CakSNP17080    | <i>Kabuli</i>    | Ca_Kabuli_denovo             | 157822                         | (A/G)       |
| 17081       | CakSNP17081    | <i>Kabuli</i>    | Ca_Kabuli_denovo             | 157997                         | (G/C)       |
| 17082       | CakSNP17082    | <i>Kabuli</i>    | Ca_Kabuli_denovo             | 158850                         | (C/A)       |
| 17083       | CakSNP17083    | <i>Kabuli</i>    | Ca_Kabuli_denovo             | 159015                         | (G/A)       |
| 17084       | CakSNP17084    | <i>Kabuli</i>    | Ca_Kabuli_denovo             | 159016                         | (G/C)       |
| 17085       | CakSNP17085    | <i>Kabuli</i>    | Ca_Kabuli_denovo             | 159017                         | (A/C)       |
| 17086       | CakSNP17086    | <i>Kabuli</i>    | Ca_Kabuli_denovo             | 159018                         | (A/G)       |
| 17087       | CakSNP17087    | <i>Kabuli</i>    | Ca_Kabuli_denovo             | 159019                         | (T/A)       |
| 17088       | CakSNP17088    | <i>Kabuli</i>    | Ca_Kabuli_denovo             | 159020                         | (G/T)       |
| 17089       | CakSNP17089    | <i>Kabuli</i>    | Ca_Kabuli_denovo             | 164804                         | (T/G)       |
| 17090       | CakSNP17090    | <i>Kabuli</i>    | Ca_Kabuli_denovo             | 164847                         | (T/C)       |
| 17091       | CakSNP17091    | <i>Kabuli</i>    | Ca_Kabuli_denovo             | 164877                         | (A/G)       |
| 17092       | CakSNP17092    | <i>Kabuli</i>    | Ca_Kabuli_denovo             | 164886                         | (G/C)       |
| 17093       | CakSNP17093    | <i>Kabuli</i>    | Ca_Kabuli_denovo             | 165283                         | (C/G)       |
| 17094       | CakSNP17094    | <i>Kabuli</i>    | Ca_Kabuli_denovo             | 165296                         | (C/A)       |
| 17095       | CakSNP17095    | <i>Kabuli</i>    | Ca_Kabuli_denovo             | 165324                         | (A/G)       |
| 17096       | CakSNP17096    | <i>Kabuli</i>    | Ca_Kabuli_denovo             | 165355                         | (T/G)       |
| 17097       | CakSNP17097    | <i>Kabuli</i>    | Ca_Kabuli_denovo             | 166177                         | (A/G)       |
| 17098       | CakSNP17098    | <i>Kabuli</i>    | Ca_Kabuli_denovo             | 166179                         | (G/A)       |
| 17099       | CakSNP17099    | <i>Kabuli</i>    | Ca_Kabuli_denovo             | 166181                         | (T/A)       |

| <b>S.N.</b> | <b>SNP IDs</b> | <b>Cultivars</b> | <b>Chromosomes/scaffolds</b> | <b>Physical positions (bp)</b> | <b>SNPs</b> |
|-------------|----------------|------------------|------------------------------|--------------------------------|-------------|
| 17100       | CakSNP17100    | <i>Kabuli</i>    | Ca_Kabuli_denovo             | 166736                         | (C/G)       |
| 17101       | CakSNP17101    | <i>Kabuli</i>    | Ca_Kabuli_denovo             | 166737                         | (A/G)       |
| 17102       | CakSNP17102    | <i>Kabuli</i>    | Ca_Kabuli_denovo             | 166738                         | (G/A)       |
| 17103       | CakSNP17103    | <i>Kabuli</i>    | Ca_Kabuli_denovo             | 166758                         | (G/C)       |
| 17104       | CakSNP17104    | <i>Kabuli</i>    | Ca_Kabuli_denovo             | 166767                         | (A/G)       |
| 17105       | CakSNP17105    | <i>Kabuli</i>    | Ca_Kabuli_denovo             | 166786                         | (A/G)       |
| 17106       | CakSNP17106    | <i>Kabuli</i>    | Ca_Kabuli_denovo             | 166809                         | (A/G)       |
| 17107       | CakSNP17107    | <i>Kabuli</i>    | Ca_Kabuli_denovo             | 166828                         | (A/C)       |
| 17108       | CakSNP17108    | <i>Kabuli</i>    | Ca_Kabuli_denovo             | 166836                         | (A/C)       |
| 17109       | CakSNP17109    | <i>Kabuli</i>    | Ca_Kabuli_denovo             | 166843                         | (G/T)       |
| 17110       | CakSNP17110    | <i>Kabuli</i>    | Ca_Kabuli_denovo             | 167563                         | (G/C)       |
| 17111       | CakSNP17111    | <i>Kabuli</i>    | Ca_Kabuli_denovo             | 167564                         | (C/A)       |
| 17112       | CakSNP17112    | <i>Kabuli</i>    | Ca_Kabuli_denovo             | 167565                         | (A/G)       |
| 17113       | CakSNP17113    | <i>Kabuli</i>    | Ca_Kabuli_denovo             | 167567                         | (A/G)       |
| 17114       | CakSNP17114    | <i>Kabuli</i>    | Ca_Kabuli_denovo             | 167569                         | (T/A)       |
| 17115       | CakSNP17115    | <i>Kabuli</i>    | Ca_Kabuli_denovo             | 169044                         | (A/G)       |
| 17116       | CakSNP17116    | <i>Kabuli</i>    | Ca_Kabuli_denovo             | 169046                         | (A/G)       |
| 17117       | CakSNP17117    | <i>Kabuli</i>    | Ca_Kabuli_denovo             | 169047                         | (G/A)       |
| 17118       | CakSNP17118    | <i>Kabuli</i>    | Ca_Kabuli_denovo             | 171930                         | (G/A)       |
| 17119       | CakSNP17119    | <i>Kabuli</i>    | Ca_Kabuli_denovo             | 171932                         | (G/A)       |
| 17120       | CakSNP17120    | <i>Kabuli</i>    | Ca_Kabuli_denovo             | 171933                         | (A/G)       |
| 17121       | CakSNP17121    | <i>Kabuli</i>    | Ca_Kabuli_denovo             | 171983                         | (T/A)       |
| 17122       | CakSNP17122    | <i>Kabuli</i>    | Ca_Kabuli_denovo             | 171999                         | (G/T)       |
| 17123       | CakSNP17123    | <i>Kabuli</i>    | Ca_Kabuli_denovo             | 172017                         | (A/G)       |
| 17124       | CakSNP17124    | <i>Kabuli</i>    | Ca_Kabuli_denovo             | 172035                         | (T/A)       |
| 17125       | CakSNP17125    | <i>Kabuli</i>    | Ca_Kabuli_denovo             | 172044                         | (A/G)       |
| 17126       | CakSNP17126    | <i>Kabuli</i>    | Ca_Kabuli_denovo             | 173451                         | (A/G)       |
| 17127       | CakSNP17127    | <i>Kabuli</i>    | Ca_Kabuli_denovo             | 173462                         | (C/G)       |
| 17128       | CakSNP17128    | <i>Kabuli</i>    | Ca_Kabuli_denovo             | 173472                         | (C/G)       |
| 17129       | CakSNP17129    | <i>Kabuli</i>    | Ca_Kabuli_denovo             | 174632                         | (C/A)       |
| 17130       | CakSNP17130    | <i>Kabuli</i>    | Ca_Kabuli_denovo             | 174633                         | (A/G)       |
| 17131       | CakSNP17131    | <i>Kabuli</i>    | Ca_Kabuli_denovo             | 174635                         | (A/G)       |
| 17132       | CakSNP17132    | <i>Kabuli</i>    | Ca_Kabuli_denovo             | 175138                         | (C/G)       |
| 17133       | CakSNP17133    | <i>Kabuli</i>    | Ca_Kabuli_denovo             | 175160                         | (A/G)       |
| 17134       | CakSNP17134    | <i>Kabuli</i>    | Ca_Kabuli_denovo             | 175170                         | (T/G)       |
| 17135       | CakSNP17135    | <i>Kabuli</i>    | Ca_Kabuli_denovo             | 176799                         | (T/G)       |
| 17136       | CakSNP17136    | <i>Kabuli</i>    | Ca_Kabuli_denovo             | 176814                         | (T/A)       |
| 17137       | CakSNP17137    | <i>Kabuli</i>    | Ca_Kabuli_denovo             | 176822                         | (T/G)       |

| <b>S.N.</b> | <b>SNP IDs</b> | <b>Cultivars</b> | <b>Chromosomes/scaffolds</b> | <b>Physical positions (bp)</b> | <b>SNPs</b> |
|-------------|----------------|------------------|------------------------------|--------------------------------|-------------|
| 17138       | CakSNP17138    | <i>Kabuli</i>    | Ca_Kabuli_denovo             | 176824                         | (C/G)       |
| 17139       | CakSNP17139    | <i>Kabuli</i>    | Ca_Kabuli_denovo             | 176831                         | (T/G)       |
| 17140       | CakSNP17140    | <i>Kabuli</i>    | Ca_Kabuli_denovo             | 176835                         | (T/G)       |
| 17141       | CakSNP17141    | <i>Kabuli</i>    | Ca_Kabuli_denovo             | 176837                         | (A/G)       |
| 17142       | CakSNP17142    | <i>Kabuli</i>    | Ca_Kabuli_denovo             | 176839                         | (T/G)       |
| 17143       | CakSNP17143    | <i>Kabuli</i>    | Ca_Kabuli_denovo             | 176874                         | (T/A)       |
| 17144       | CakSNP17144    | <i>Kabuli</i>    | Ca_Kabuli_denovo             | 178198                         | (T/G)       |
| 17145       | CakSNP17145    | <i>Kabuli</i>    | Ca_Kabuli_denovo             | 178200                         | (T/G)       |
| 17146       | CakSNP17146    | <i>Kabuli</i>    | Ca_Kabuli_denovo             | 178205                         | (T/G)       |
| 17147       | CakSNP17147    | <i>Kabuli</i>    | Ca_Kabuli_denovo             | 178212                         | (C/T)       |
| 17148       | CakSNP17148    | <i>Kabuli</i>    | Ca_Kabuli_denovo             | 178217                         | (T/G)       |
| 17149       | CakSNP17149    | <i>Kabuli</i>    | Ca_Kabuli_denovo             | 178238                         | (C/G)       |
| 17150       | CakSNP17150    | <i>Kabuli</i>    | Ca_Kabuli_denovo             | 178243                         | (A/G)       |
| 17151       | CakSNP17151    | <i>Kabuli</i>    | Ca_Kabuli_denovo             | 178249                         | (T/G)       |
| 17152       | CakSNP17152    | <i>Kabuli</i>    | Ca_Kabuli_denovo             | 178251                         | (T/G)       |
| 17153       | CakSNP17153    | <i>Kabuli</i>    | Ca_Kabuli_denovo             | 178276                         | (T/C)       |
| 17154       | CakSNP17154    | <i>Kabuli</i>    | Ca_Kabuli_denovo             | 178736                         | (G/A)       |
| 17155       | CakSNP17155    | <i>Kabuli</i>    | Ca_Kabuli_denovo             | 178737                         | (C/T)       |
| 17156       | CakSNP17156    | <i>Kabuli</i>    | Ca_Kabuli_denovo             | 179759                         | (C/T)       |
| 17157       | CakSNP17157    | <i>Kabuli</i>    | Ca_Kabuli_denovo             | 180307                         | (C/A)       |
| 17158       | CakSNP17158    | <i>Kabuli</i>    | Ca_Kabuli_denovo             | 180309                         | (T/G)       |
| 17159       | CakSNP17159    | <i>Kabuli</i>    | Ca_Kabuli_denovo             | 180571                         | (G/A)       |
| 17160       | CakSNP17160    | <i>Kabuli</i>    | Ca_Kabuli_denovo             | 180573                         | (G/A)       |
| 17161       | CakSNP17161    | <i>Kabuli</i>    | Ca_Kabuli_denovo             | 180686                         | (A/G)       |
| 17162       | CakSNP17162    | <i>Kabuli</i>    | Ca_Kabuli_denovo             | 180689                         | (G/C)       |
| 17163       | CakSNP17163    | <i>Kabuli</i>    | Ca_Kabuli_denovo             | 181636                         | (T/A)       |
| 17164       | CakSNP17164    | <i>Kabuli</i>    | Ca_Kabuli_denovo             | 181639                         | (C/G)       |
| 17165       | CakSNP17165    | <i>Kabuli</i>    | Ca_Kabuli_denovo             | 181670                         | (A/G)       |
| 17166       | CakSNP17166    | <i>Kabuli</i>    | Ca_Kabuli_denovo             | 181675                         | (G/A)       |
| 17167       | CakSNP17167    | <i>Kabuli</i>    | Ca_Kabuli_denovo             | 181679                         | (G/A)       |
| 17168       | CakSNP17168    | <i>Kabuli</i>    | Ca_Kabuli_denovo             | 181698                         | (G/A)       |
| 17169       | CakSNP17169    | <i>Kabuli</i>    | Ca_Kabuli_denovo             | 181720                         | (C/G)       |
| 17170       | CakSNP17170    | <i>Kabuli</i>    | Ca_Kabuli_denovo             | 182277                         | (A/G)       |
| 17171       | CakSNP17171    | <i>Kabuli</i>    | Ca_Kabuli_denovo             | 182279                         | (A/T)       |
| 17172       | CakSNP17172    | <i>Kabuli</i>    | Ca_Kabuli_denovo             | 182280                         | (G/T)       |
| 17173       | CakSNP17173    | <i>Kabuli</i>    | Ca_Kabuli_denovo             | 182281                         | (C/G)       |
| 17174       | CakSNP17174    | <i>Kabuli</i>    | Ca_Kabuli_denovo             | 182628                         | (G/T)       |
| 17175       | CakSNP17175    | <i>Kabuli</i>    | Ca_Kabuli_denovo             | 183987                         | (G/C)       |

| <b>S.N.</b> | <b>SNP IDs</b> | <b>Cultivars</b> | <b>Chromosomes/scaffolds</b> | <b>Physical positions (bp)</b> | <b>SNPs</b> |
|-------------|----------------|------------------|------------------------------|--------------------------------|-------------|
| 17176       | CakSNP17176    | <i>Kabuli</i>    | Ca_Kabuli_denovo             | 183990                         | (A/G)       |
| 17177       | CakSNP17177    | <i>Kabuli</i>    | Ca_Kabuli_denovo             | 184118                         | (G/C)       |
| 17178       | CakSNP17178    | <i>Kabuli</i>    | Ca_Kabuli_denovo             | 184181                         | (T/G)       |
| 17179       | CakSNP17179    | <i>Kabuli</i>    | Ca_Kabuli_denovo             | 184211                         | (T/G)       |
| 17180       | CakSNP17180    | <i>Kabuli</i>    | Ca_Kabuli_denovo             | 184231                         | (C/A)       |
| 17181       | CakSNP17181    | <i>Kabuli</i>    | Ca_Kabuli_denovo             | 184333                         | (C/G)       |
| 17182       | CakSNP17182    | <i>Kabuli</i>    | Ca_Kabuli_denovo             | 184359                         | (G/T)       |
| 17183       | CakSNP17183    | <i>Kabuli</i>    | Ca_Kabuli_denovo             | 184367                         | (T/G)       |
| 17184       | CakSNP17184    | <i>Kabuli</i>    | Ca_Kabuli_denovo             | 184370                         | (C/G)       |
| 17185       | CakSNP17185    | <i>Kabuli</i>    | Ca_Kabuli_denovo             | 184372                         | (C/G)       |
| 17186       | CakSNP17186    | <i>Kabuli</i>    | Ca_Kabuli_denovo             | 184427                         | (C/G)       |
| 17187       | CakSNP17187    | <i>Kabuli</i>    | Ca_Kabuli_denovo             | 184440                         | (C/G)       |
| 17188       | CakSNP17188    | <i>Kabuli</i>    | Ca_Kabuli_denovo             | 184460                         | (T/G)       |
| 17189       | CakSNP17189    | <i>Kabuli</i>    | Ca_Kabuli_denovo             | 184487                         | (C/A)       |
| 17190       | CakSNP17190    | <i>Kabuli</i>    | Ca_Kabuli_denovo             | 184509                         | (C/T)       |
| 17191       | CakSNP17191    | <i>Kabuli</i>    | Ca_Kabuli_denovo             | 184521                         | (T/A)       |
| 17192       | CakSNP17192    | <i>Kabuli</i>    | Ca_Kabuli_denovo             | 184541                         | (C/G)       |
| 17193       | CakSNP17193    | <i>Kabuli</i>    | Ca_Kabuli_denovo             | 184553                         | (T/G)       |
| 17194       | CakSNP17194    | <i>Kabuli</i>    | Ca_Kabuli_denovo             | 184583                         | (T/G)       |
| 17195       | CakSNP17195    | <i>Kabuli</i>    | Ca_Kabuli_denovo             | 185564                         | (C/G)       |
| 17196       | CakSNP17196    | <i>Kabuli</i>    | Ca_Kabuli_denovo             | 185568                         | (T/G)       |
| 17197       | CakSNP17197    | <i>Kabuli</i>    | Ca_Kabuli_denovo             | 185573                         | (G/A)       |
| 17198       | CakSNP17198    | <i>Kabuli</i>    | Ca_Kabuli_denovo             | 185577                         | (T/G)       |
| 17199       | CakSNP17199    | <i>Kabuli</i>    | Ca_Kabuli_denovo             | 185579                         | (A/G)       |
| 17200       | CakSNP17200    | <i>Kabuli</i>    | Ca_Kabuli_denovo             | 185583                         | (A/G)       |
| 17201       | CakSNP17201    | <i>Kabuli</i>    | Ca_Kabuli_denovo             | 185634                         | (A/G)       |
| 17202       | CakSNP17202    | <i>Kabuli</i>    | Ca_Kabuli_denovo             | 185645                         | (C/G)       |
| 17203       | CakSNP17203    | <i>Kabuli</i>    | Ca_Kabuli_denovo             | 185653                         | (A/G)       |
| 17204       | CakSNP17204    | <i>Kabuli</i>    | Ca_Kabuli_denovo             | 185657                         | (C/G)       |
| 17205       | CakSNP17205    | <i>Kabuli</i>    | Ca_Kabuli_denovo             | 185669                         | (T/G)       |
| 17206       | CakSNP17206    | <i>Kabuli</i>    | Ca_Kabuli_denovo             | 185674                         | (C/G)       |
| 17207       | CakSNP17207    | <i>Kabuli</i>    | Ca_Kabuli_denovo             | 185679                         | (T/A)       |
| 17208       | CakSNP17208    | <i>Kabuli</i>    | Ca_Kabuli_denovo             | 185682                         | (T/G)       |
| 17209       | CakSNP17209    | <i>Kabuli</i>    | Ca_Kabuli_denovo             | 187188                         | (A/G)       |
| 17210       | CakSNP17210    | <i>Kabuli</i>    | Ca_Kabuli_denovo             | 188302                         | (G/A)       |
| 17211       | CakSNP17211    | <i>Kabuli</i>    | Ca_Kabuli_denovo             | 188305                         | (C/A)       |
| 17212       | CakSNP17212    | <i>Kabuli</i>    | Ca_Kabuli_denovo             | 188306                         | (A/G)       |
| 17213       | CakSNP17213    | <i>Kabuli</i>    | Ca_Kabuli_denovo             | 188308                         | (C/A)       |

| <b>S.N.</b> | <b>SNP IDs</b> | <b>Cultivars</b> | <b>Chromosomes/scaffolds</b> | <b>Physical positions (bp)</b> | <b>SNPs</b> |
|-------------|----------------|------------------|------------------------------|--------------------------------|-------------|
| 17214       | CakSNP17214    | <i>Kabuli</i>    | Ca_Kabuli_denovo             | 188310                         | (G/T)       |
| 17215       | CakSNP17215    | <i>Kabuli</i>    | Ca_Kabuli_denovo             | 188312                         | (A/C)       |
| 17216       | CakSNP17216    | <i>Kabuli</i>    | Ca_Kabuli_denovo             | 188313                         | (C/A)       |
| 17217       | CakSNP17217    | <i>Kabuli</i>    | Ca_Kabuli_denovo             | 190388                         | (C/G)       |
| 17218       | CakSNP17218    | <i>Kabuli</i>    | Ca_Kabuli_denovo             | 190404                         | (C/G)       |
| 17219       | CakSNP17219    | <i>Kabuli</i>    | Ca_Kabuli_denovo             | 194914                         | (A/G)       |
| 17220       | CakSNP17220    | <i>Kabuli</i>    | Ca_Kabuli_denovo             | 194915                         | (C/G)       |
| 17221       | CakSNP17221    | <i>Kabuli</i>    | Ca_Kabuli_denovo             | 195589                         | (A/G)       |
| 17222       | CakSNP17222    | <i>Kabuli</i>    | Ca_Kabuli_denovo             | 195605                         | (C/G)       |
| 17223       | CakSNP17223    | <i>Kabuli</i>    | Ca_Kabuli_denovo             | 195642                         | (C/G)       |
| 17224       | CakSNP17224    | <i>Kabuli</i>    | Ca_Kabuli_denovo             | 195663                         | (T/A)       |
| 17225       | CakSNP17225    | <i>Kabuli</i>    | Ca_Kabuli_denovo             | 195669                         | (T/G)       |
| 17226       | CakSNP17226    | <i>Kabuli</i>    | Ca_Kabuli_denovo             | 196773                         | (C/G)       |
| 17227       | CakSNP17227    | <i>Kabuli</i>    | Ca_Kabuli_denovo             | 196775                         | (T/G)       |
| 17228       | CakSNP17228    | <i>Kabuli</i>    | Ca_Kabuli_denovo             | 196777                         | (C/T)       |
| 17229       | CakSNP17229    | <i>Kabuli</i>    | Ca_Kabuli_denovo             | 197792                         | (A/G)       |
| 17230       | CakSNP17230    | <i>Kabuli</i>    | Ca_Kabuli_denovo             | 197793                         | (G/C)       |
| 17231       | CakSNP17231    | <i>Kabuli</i>    | Ca_Kabuli_denovo             | 197795                         | (A/G)       |
| 17232       | CakSNP17232    | <i>Kabuli</i>    | Ca_Kabuli_denovo             | 197796                         | (G/A)       |
| 17233       | CakSNP17233    | <i>Kabuli</i>    | Ca_Kabuli_denovo             | 197799                         | (C/A)       |
| 17234       | CakSNP17234    | <i>Kabuli</i>    | Ca_Kabuli_denovo             | 197800                         | (C/T)       |
| 17235       | CakSNP17235    | <i>Kabuli</i>    | Ca_Kabuli_denovo             | 197802                         | (A/C)       |
| 17236       | CakSNP17236    | <i>Kabuli</i>    | Ca_Kabuli_denovo             | 197991                         | (C/G)       |
| 17237       | CakSNP17237    | <i>Kabuli</i>    | Ca_Kabuli_denovo             | 197992                         | (G/A)       |
| 17238       | CakSNP17238    | <i>Kabuli</i>    | Ca_Kabuli_denovo             | 197993                         | (A/T)       |
| 17239       | CakSNP17239    | <i>Kabuli</i>    | Ca_Kabuli_denovo             | 197994                         | (C/T)       |
| 17240       | CakSNP17240    | <i>Kabuli</i>    | Ca_Kabuli_denovo             | 197995                         | (T/C)       |
| 17241       | CakSNP17241    | <i>Kabuli</i>    | Ca_Kabuli_denovo             | 197996                         | (C/T)       |
| 17242       | CakSNP17242    | <i>Kabuli</i>    | Ca_Kabuli_denovo             | 198162                         | (T/G)       |
| 17243       | CakSNP17243    | <i>Kabuli</i>    | Ca_Kabuli_denovo             | 198166                         | (C/G)       |
| 17244       | CakSNP17244    | <i>Kabuli</i>    | Ca_Kabuli_denovo             | 198168                         | (A/G)       |
| 17245       | CakSNP17245    | <i>Kabuli</i>    | Ca_Kabuli_denovo             | 198170                         | (G/A)       |
| 17246       | CakSNP17246    | <i>Kabuli</i>    | Ca_Kabuli_denovo             | 198171                         | (C/A)       |
| 17247       | CakSNP17247    | <i>Kabuli</i>    | Ca_Kabuli_denovo             | 198358                         | (T/G)       |
| 17248       | CakSNP17248    | <i>Kabuli</i>    | Ca_Kabuli_denovo             | 198365                         | (A/G)       |
| 17249       | CakSNP17249    | <i>Kabuli</i>    | Ca_Kabuli_denovo             | 198366                         | (C/A)       |
| 17250       | CakSNP17250    | <i>Kabuli</i>    | Ca_Kabuli_denovo             | 198367                         | (C/T)       |
| 17251       | CakSNP17251    | <i>Kabuli</i>    | Ca_Kabuli_denovo             | 198370                         | (C/T)       |



| <b>S.N.</b> | <b>SNP IDs</b> | <b>Cultivars</b> | <b>Chromosomes/scaffolds</b> | <b>Physical positions (bp)</b> | <b>SNPs</b> |
|-------------|----------------|------------------|------------------------------|--------------------------------|-------------|
| 17252       | CakSNP17252    | <i>Kabuli</i>    | Ca_Kabuli_denovo             | 198431                         | (G/A)       |
| 17253       | CakSNP17253    | <i>Kabuli</i>    | Ca_Kabuli_denovo             | 198433                         | (A/G)       |
| 17254       | CakSNP17254    | <i>Kabuli</i>    | Ca_Kabuli_denovo             | 198434                         | (G/A)       |
| 17255       | CakSNP17255    | <i>Kabuli</i>    | Ca_Kabuli_denovo             | 198435                         | (A/G)       |
| 17256       | CakSNP17256    | <i>Kabuli</i>    | Ca_Kabuli_denovo             | 198436                         | (G/C)       |
| 17257       | CakSNP17257    | <i>Kabuli</i>    | Ca_Kabuli_denovo             | 198437                         | (C/G)       |
| 17258       | CakSNP17258    | <i>Kabuli</i>    | Ca_Kabuli_denovo             | 198439                         | (G/T)       |
| 17259       | CakSNP17259    | <i>Kabuli</i>    | Ca_Kabuli_denovo             | 198441                         | (T/C)       |
| 17260       | CakSNP17260    | <i>Kabuli</i>    | Ca_Kabuli_denovo             | 198442                         | (C/A)       |
| 17261       | CakSNP17261    | <i>Kabuli</i>    | Ca_Kabuli_denovo             | 198443                         | (A/G)       |
| 17262       | CakSNP17262    | <i>Kabuli</i>    | Ca_Kabuli_denovo             | 198444                         | (G/C)       |
| 17263       | CakSNP17263    | <i>Kabuli</i>    | Ca_Kabuli_denovo             | 198445                         | (C/A)       |
| 17264       | CakSNP17264    | <i>Kabuli</i>    | Ca_Kabuli_denovo             | 198446                         | (A/G)       |
| 17265       | CakSNP17265    | <i>Kabuli</i>    | Ca_Kabuli_denovo             | 198448                         | (G/A)       |
| 17266       | CakSNP17266    | <i>Kabuli</i>    | Ca_Kabuli_denovo             | 198450                         | (A/T)       |
| 17267       | CakSNP17267    | <i>Kabuli</i>    | Ca_Kabuli_denovo             | 198451                         | (T/G)       |
| 17268       | CakSNP17268    | <i>Kabuli</i>    | Ca_Kabuli_denovo             | 198452                         | (G/C)       |
| 17269       | CakSNP17269    | <i>Kabuli</i>    | Ca_Kabuli_denovo             | 198454                         | (C/G)       |
| 17270       | CakSNP17270    | <i>Kabuli</i>    | Ca_Kabuli_denovo             | 198455                         | (G/A)       |
| 17271       | CakSNP17271    | <i>Kabuli</i>    | Ca_Kabuli_denovo             | 198456                         | (A/G)       |
| 17272       | CakSNP17272    | <i>Kabuli</i>    | Ca_Kabuli_denovo             | 198457                         | (G/A)       |
| 17273       | CakSNP17273    | <i>Kabuli</i>    | Ca_Kabuli_denovo             | 198458                         | (A/C)       |
| 17274       | CakSNP17274    | <i>Kabuli</i>    | Ca_Kabuli_denovo             | 198842                         | (T/G)       |
| 17275       | CakSNP17275    | <i>Kabuli</i>    | Ca_Kabuli_denovo             | 199140                         | (C/A)       |
| 17276       | CakSNP17276    | <i>Kabuli</i>    | Ca_Kabuli_denovo             | 199240                         | (T/C)       |
| 17277       | CakSNP17277    | <i>Kabuli</i>    | Ca_Kabuli_denovo             | 199747                         | (C/G)       |
| 17278       | CakSNP17278    | <i>Kabuli</i>    | Ca_Kabuli_denovo             | 200458                         | (A/G)       |
| 17279       | CakSNP17279    | <i>Kabuli</i>    | Ca_Kabuli_denovo             | 200459                         | (T/G)       |
| 17280       | CakSNP17280    | <i>Kabuli</i>    | Ca_Kabuli_denovo             | 200728                         | (T/C)       |
| 17281       | CakSNP17281    | <i>Kabuli</i>    | Ca_Kabuli_denovo             | 200743                         | (C/G)       |
| 17282       | CakSNP17282    | <i>Kabuli</i>    | Ca_Kabuli_denovo             | 200890                         | (T/A)       |
| 17283       | CakSNP17283    | <i>Kabuli</i>    | Ca_Kabuli_denovo             | 200910                         | (G/A)       |
| 17284       | CakSNP17284    | <i>Kabuli</i>    | Ca_Kabuli_denovo             | 201180                         | (G/T)       |
| 17285       | CakSNP17285    | <i>Kabuli</i>    | Ca_Kabuli_denovo             | 201201                         | (A/G)       |
| 17286       | CakSNP17286    | <i>Kabuli</i>    | Ca_Kabuli_denovo             | 201287                         | (A/C)       |
| 17287       | CakSNP17287    | <i>Kabuli</i>    | Ca_Kabuli_denovo             | 201365                         | (A/T)       |
| 17288       | CakSNP17288    | <i>Kabuli</i>    | Ca_Kabuli_denovo             | 201444                         | (T/G)       |
| 17289       | CakSNP17289    | <i>Kabuli</i>    | Ca_Kabuli_denovo             | 201979                         | (G/A)       |

| <b>S.N.</b> | <b>SNP IDs</b> | <b>Cultivars</b> | <b>Chromosomes/scaffolds</b> | <b>Physical positions (bp)</b> | <b>SNPs</b> |
|-------------|----------------|------------------|------------------------------|--------------------------------|-------------|
| 17290       | CakSNP17290    | <i>Kabuli</i>    | Ca_Kabuli_denovo             | 201981                         | (G/A)       |
| 17291       | CakSNP17291    | <i>Kabuli</i>    | Ca_Kabuli_denovo             | 201982                         | (A/G)       |
| 17292       | CakSNP17292    | <i>Kabuli</i>    | Ca_Kabuli_denovo             | 202419                         | (T/G)       |
| 17293       | CakSNP17293    | <i>Kabuli</i>    | Ca_Kabuli_denovo             | 202456                         | (T/G)       |
| 17294       | CakSNP17294    | <i>Kabuli</i>    | Ca_Kabuli_denovo             | 202459                         | (C/T)       |
| 17295       | CakSNP17295    | <i>Kabuli</i>    | Ca_Kabuli_denovo             | 202460                         | (G/C)       |
| 17296       | CakSNP17296    | <i>Kabuli</i>    | Ca_Kabuli_denovo             | 202461                         | (T/G)       |
| 17297       | CakSNP17297    | <i>Kabuli</i>    | Ca_Kabuli_denovo             | 202523                         | (G/A)       |
| 17298       | CakSNP17298    | <i>Kabuli</i>    | Ca_Kabuli_denovo             | 202525                         | (A/G)       |
| 17299       | CakSNP17299    | <i>Kabuli</i>    | Ca_Kabuli_denovo             | 202526                         | (G/A)       |
| 17300       | CakSNP17300    | <i>Kabuli</i>    | Ca_Kabuli_denovo             | 202527                         | (A/G)       |
| 17301       | CakSNP17301    | <i>Kabuli</i>    | Ca_Kabuli_denovo             | 202529                         | (C/G)       |
| 17302       | CakSNP17302    | <i>Kabuli</i>    | Ca_Kabuli_denovo             | 202531                         | (G/T)       |
| 17303       | CakSNP17303    | <i>Kabuli</i>    | Ca_Kabuli_denovo             | 202533                         | (T/C)       |
| 17304       | CakSNP17304    | <i>Kabuli</i>    | Ca_Kabuli_denovo             | 202534                         | (C/A)       |
| 17305       | CakSNP17305    | <i>Kabuli</i>    | Ca_Kabuli_denovo             | 202535                         | (A/G)       |
| 17306       | CakSNP17306    | <i>Kabuli</i>    | Ca_Kabuli_denovo             | 202536                         | (G/C)       |
| 17307       | CakSNP17307    | <i>Kabuli</i>    | Ca_Kabuli_denovo             | 202537                         | (C/A)       |
| 17308       | CakSNP17308    | <i>Kabuli</i>    | Ca_Kabuli_denovo             | 202538                         | (A/G)       |
| 17309       | CakSNP17309    | <i>Kabuli</i>    | Ca_Kabuli_denovo             | 202540                         | (G/A)       |
| 17310       | CakSNP17310    | <i>Kabuli</i>    | Ca_Kabuli_denovo             | 202542                         | (A/T)       |
| 17311       | CakSNP17311    | <i>Kabuli</i>    | Ca_Kabuli_denovo             | 202544                         | (G/C)       |
| 17312       | CakSNP17312    | <i>Kabuli</i>    | Ca_Kabuli_denovo             | 202546                         | (C/G)       |
| 17313       | CakSNP17313    | <i>Kabuli</i>    | Ca_Kabuli_denovo             | 202547                         | (G/A)       |
| 17314       | CakSNP17314    | <i>Kabuli</i>    | Ca_Kabuli_denovo             | 202548                         | (A/G)       |
| 17315       | CakSNP17315    | <i>Kabuli</i>    | Ca_Kabuli_denovo             | 202549                         | (G/A)       |
| 17316       | CakSNP17316    | <i>Kabuli</i>    | Ca_Kabuli_denovo             | 202550                         | (A/T)       |
| 17317       | CakSNP17317    | <i>Kabuli</i>    | Ca_Kabuli_denovo             | 202551                         | (C/A)       |
| 17318       | CakSNP17318    | <i>Kabuli</i>    | Ca_Kabuli_denovo             | 202553                         | (C/G)       |
| 17319       | CakSNP17319    | <i>Kabuli</i>    | Ca_Kabuli_denovo             | 204292                         | (A/G)       |
| 17320       | CakSNP17320    | <i>Kabuli</i>    | Ca_Kabuli_denovo             | 204293                         | (G/C)       |
| 17321       | CakSNP17321    | <i>Kabuli</i>    | Ca_Kabuli_denovo             | 207676                         | (T/A)       |
| 17322       | CakSNP17322    | <i>Kabuli</i>    | Ca_Kabuli_denovo             | 207681                         | (T/G)       |
| 17323       | CakSNP17323    | <i>Kabuli</i>    | Ca_Kabuli_denovo             | 207690                         | (C/G)       |
| 17324       | CakSNP17324    | <i>Kabuli</i>    | Ca_Kabuli_denovo             | 207698                         | (A/G)       |
| 17325       | CakSNP17325    | <i>Kabuli</i>    | Ca_Kabuli_denovo             | 207703                         | (T/A)       |
| 17326       | CakSNP17326    | <i>Kabuli</i>    | Ca_Kabuli_denovo             | 207712                         | (C/G)       |
| 17327       | CakSNP17327    | <i>Kabuli</i>    | Ca_Kabuli_denovo             | 207716                         | (C/G)       |

| <b>S.N.</b> | <b>SNP IDs</b> | <b>Cultivars</b> | <b>Chromosomes/scaffolds</b> | <b>Physical positions (bp)</b> | <b>SNPs</b> |
|-------------|----------------|------------------|------------------------------|--------------------------------|-------------|
| 17328       | CakSNP17328    | <i>Kabuli</i>    | Ca_Kabuli_denovo             | 207737                         | (T/G)       |
| 17329       | CakSNP17329    | <i>Kabuli</i>    | Ca_Kabuli_denovo             | 208035                         | (G/A)       |
| 17330       | CakSNP17330    | <i>Kabuli</i>    | Ca_Kabuli_denovo             | 208036                         | (A/T)       |
| 17331       | CakSNP17331    | <i>Kabuli</i>    | Ca_Kabuli_denovo             | 208037                         | (C/T)       |
| 17332       | CakSNP17332    | <i>Kabuli</i>    | Ca_Kabuli_denovo             | 208042                         | (A/T)       |
| 17333       | CakSNP17333    | <i>Kabuli</i>    | Ca_Kabuli_denovo             | 209330                         | (A/G)       |
| 17334       | CakSNP17334    | <i>Kabuli</i>    | Ca_Kabuli_denovo             | 209332                         | (C/T)       |
| 17335       | CakSNP17335    | <i>Kabuli</i>    | Ca_Kabuli_denovo             | 209333                         | (C/G)       |
| 17336       | CakSNP17336    | <i>Kabuli</i>    | Ca_Kabuli_denovo             | 209334                         | (G/C)       |
| 17337       | CakSNP17337    | <i>Kabuli</i>    | Ca_Kabuli_denovo             | 210208                         | (A/T)       |
| 17338       | CakSNP17338    | <i>Kabuli</i>    | Ca_Kabuli_denovo             | 210216                         | (T/C)       |
| 17339       | CakSNP17339    | <i>Kabuli</i>    | Ca_Kabuli_denovo             | 210225                         | (G/A)       |
| 17340       | CakSNP17340    | <i>Kabuli</i>    | Ca_Kabuli_denovo             | 210237                         | (A/T)       |
| 17341       | CakSNP17341    | <i>Kabuli</i>    | Ca_Kabuli_denovo             | 215170                         | (G/A)       |
| 17342       | CakSNP17342    | <i>Kabuli</i>    | Ca_Kabuli_denovo             | 215678                         | (T/G)       |
| 17343       | CakSNP17343    | <i>Kabuli</i>    | Ca_Kabuli_denovo             | 215689                         | (C/A)       |
| 17344       | CakSNP17344    | <i>Kabuli</i>    | Ca_Kabuli_denovo             | 215699                         | (A/G)       |
| 17345       | CakSNP17345    | <i>Kabuli</i>    | Ca_Kabuli_denovo             | 215705                         | (T/G)       |
| 17346       | CakSNP17346    | <i>Kabuli</i>    | Ca_Kabuli_denovo             | 215723                         | (A/G)       |
| 17347       | CakSNP17347    | <i>Kabuli</i>    | Ca_Kabuli_denovo             | 215731                         | (C/G)       |
| 17348       | CakSNP17348    | <i>Kabuli</i>    | Ca_Kabuli_denovo             | 215752                         | (G/A)       |
| 17349       | CakSNP17349    | <i>Kabuli</i>    | Ca_Kabuli_denovo             | 215757                         | (G/T)       |
| 17350       | CakSNP17350    | <i>Kabuli</i>    | Ca_Kabuli_denovo             | 217228                         | (C/A)       |
| 17351       | CakSNP17351    | <i>Kabuli</i>    | Ca_Kabuli_denovo             | 217229                         | (A/T)       |
| 17352       | CakSNP17352    | <i>Kabuli</i>    | Ca_Kabuli_denovo             | 217232                         | (C/A)       |
| 17353       | CakSNP17353    | <i>Kabuli</i>    | Ca_Kabuli_denovo             | 220674                         | (C/G)       |
| 17354       | CakSNP17354    | <i>Kabuli</i>    | Ca_Kabuli_denovo             | 220676                         | (T/G)       |
| 17355       | CakSNP17355    | <i>Kabuli</i>    | Ca_Kabuli_denovo             | 220678                         | (C/T)       |
| 17356       | CakSNP17356    | <i>Kabuli</i>    | Ca_Kabuli_denovo             | 220679                         | (A/C)       |
| 17357       | CakSNP17357    | <i>Kabuli</i>    | Ca_Kabuli_denovo             | 222258                         | (C/G)       |
| 17358       | CakSNP17358    | <i>Kabuli</i>    | Ca_Kabuli_denovo             | 222260                         | (T/G)       |
| 17359       | CakSNP17359    | <i>Kabuli</i>    | Ca_Kabuli_denovo             | 222262                         | (C/T)       |
| 17360       | CakSNP17360    | <i>Kabuli</i>    | Ca_Kabuli_denovo             | 223208                         | (C/A)       |
| 17361       | CakSNP17361    | <i>Kabuli</i>    | Ca_Kabuli_denovo             | 223209                         | (T/A)       |
| 17362       | CakSNP17362    | <i>Kabuli</i>    | Ca_Kabuli_denovo             | 223211                         | (C/G)       |
| 17363       | CakSNP17363    | <i>Kabuli</i>    | Ca_Kabuli_denovo             | 223224                         | (G/A)       |
| 17364       | CakSNP17364    | <i>Kabuli</i>    | Ca_Kabuli_denovo             | 223241                         | (T/G)       |
| 17365       | CakSNP17365    | <i>Kabuli</i>    | Ca_Kabuli_denovo             | 223243                         | (A/G)       |

| <b>S.N.</b> | <b>SNP IDs</b> | <b>Cultivars</b> | <b>Chromosomes/scaffolds</b> | <b>Physical positions (bp)</b> | <b>SNPs</b> |
|-------------|----------------|------------------|------------------------------|--------------------------------|-------------|
| 17366       | CakSNP17366    | <i>Kabuli</i>    | Ca_Kabuli_denovo             | 223248                         | (A/C)       |
| 17367       | CakSNP17367    | <i>Kabuli</i>    | Ca_Kabuli_denovo             | 223251                         | (T/G)       |
| 17368       | CakSNP17368    | <i>Kabuli</i>    | Ca_Kabuli_denovo             | 223258                         | (A/G)       |
| 17369       | CakSNP17369    | <i>Kabuli</i>    | Ca_Kabuli_denovo             | 223261                         | (G/A)       |
| 17370       | CakSNP17370    | <i>Kabuli</i>    | Ca_Kabuli_denovo             | 224544                         | (T/C)       |
| 17371       | CakSNP17371    | <i>Kabuli</i>    | Ca_Kabuli_denovo             | 224555                         | (G/A)       |
| 17372       | CakSNP17372    | <i>Kabuli</i>    | Ca_Kabuli_denovo             | 224557                         | (T/C)       |
| 17373       | CakSNP17373    | <i>Kabuli</i>    | Ca_Kabuli_denovo             | 224865                         | (C/A)       |
| 17374       | CakSNP17374    | <i>Kabuli</i>    | Ca_Kabuli_denovo             | 224867                         | (C/G)       |
| 17375       | CakSNP17375    | <i>Kabuli</i>    | Ca_Kabuli_denovo             | 224868                         | (G/A)       |
| 17376       | CakSNP17376    | <i>Kabuli</i>    | Ca_Kabuli_denovo             | 225042                         | (A/G)       |
| 17377       | CakSNP17377    | <i>Kabuli</i>    | Ca_Kabuli_denovo             | 225043                         | (A/G)       |
| 17378       | CakSNP17378    | <i>Kabuli</i>    | Ca_Kabuli_denovo             | 225408                         | (A/C)       |
| 17379       | CakSNP17379    | <i>Kabuli</i>    | Ca_Kabuli_denovo             | 225409                         | (C/A)       |
| 17380       | CakSNP17380    | <i>Kabuli</i>    | Ca_Kabuli_denovo             | 225414                         | (T/A)       |
| 17381       | CakSNP17381    | <i>Kabuli</i>    | Ca_Kabuli_denovo             | 225417                         | (G/T)       |
| 17382       | CakSNP17382    | <i>Kabuli</i>    | Ca_Kabuli_denovo             | 225422                         | (G/C)       |
| 17383       | CakSNP17383    | <i>Kabuli</i>    | Ca_Kabuli_denovo             | 225425                         | (T/G)       |
| 17384       | CakSNP17384    | <i>Kabuli</i>    | Ca_Kabuli_denovo             | 230711                         | (G/T)       |
| 17385       | CakSNP17385    | <i>Kabuli</i>    | Ca_Kabuli_denovo             | 230712                         | (C/T)       |
| 17386       | CakSNP17386    | <i>Kabuli</i>    | Ca_Kabuli_denovo             | 232397                         | (G/C)       |
| 17387       | CakSNP17387    | <i>Kabuli</i>    | Ca_Kabuli_denovo             | 232398                         | (C/G)       |
| 17388       | CakSNP17388    | <i>Kabuli</i>    | Ca_Kabuli_denovo             | 232399                         | (C/A)       |
| 17389       | CakSNP17389    | <i>Kabuli</i>    | Ca_Kabuli_denovo             | 232400                         | (T/G)       |
| 17390       | CakSNP17390    | <i>Kabuli</i>    | Ca_Kabuli_denovo             | 232401                         | (C/A)       |
| 17391       | CakSNP17391    | <i>Kabuli</i>    | Ca_Kabuli_denovo             | 235464                         | (C/A)       |
| 17392       | CakSNP17392    | <i>Kabuli</i>    | Ca_Kabuli_denovo             | 238447                         | (A/G)       |
| 17393       | CakSNP17393    | <i>Kabuli</i>    | Ca_Kabuli_denovo             | 238449                         | (A/G)       |
| 17394       | CakSNP17394    | <i>Kabuli</i>    | Ca_Kabuli_denovo             | 238451                         | (T/A)       |
| 17395       | CakSNP17395    | <i>Kabuli</i>    | Ca_Kabuli_denovo             | 238452                         | (G/T)       |
| 17396       | CakSNP17396    | <i>Kabuli</i>    | Ca_Kabuli_denovo             | 239728                         | (G/T)       |
| 17397       | CakSNP17397    | <i>Kabuli</i>    | Ca_Kabuli_denovo             | 240943                         | (C/T)       |
| 17398       | CakSNP17398    | <i>Kabuli</i>    | Ca_Kabuli_denovo             | 248697                         | (A/C)       |
| 17399       | CakSNP17399    | <i>Kabuli</i>    | Ca_Kabuli_denovo             | 248719                         | (T/C)       |
| 17400       | CakSNP17400    | <i>Kabuli</i>    | Ca_Kabuli_denovo             | 248775                         | (T/G)       |
| 17401       | CakSNP17401    | <i>Kabuli</i>    | Ca_Kabuli_denovo             | 256228                         | (A/G)       |
| 17402       | CakSNP17402    | <i>Kabuli</i>    | Ca_Kabuli_denovo             | 256262                         | (T/G)       |
| 17403       | CakSNP17403    | <i>Kabuli</i>    | Ca_Kabuli_denovo             | 256272                         | (G/A)       |

| <b>S.N.</b> | <b>SNP IDs</b> | <b>Cultivars</b> | <b>Chromosomes/scaffolds</b> | <b>Physical positions (bp)</b> | <b>SNPs</b> |
|-------------|----------------|------------------|------------------------------|--------------------------------|-------------|
| 17404       | CakSNP17404    | <i>Kabuli</i>    | Ca_Kabuli_denovo             | 264802                         | (G/C)       |
| 17405       | CakSNP17405    | <i>Kabuli</i>    | Ca_Kabuli_denovo             | 264812                         | (T/G)       |
| 17406       | CakSNP17406    | <i>Kabuli</i>    | Ca_Kabuli_denovo             | 264815                         | (C/G)       |
| 17407       | CakSNP17407    | <i>Kabuli</i>    | Ca_Kabuli_denovo             | 264817                         | (G/C)       |
| 17408       | CakSNP17408    | <i>Kabuli</i>    | Ca_Kabuli_denovo             | 264819                         | (A/G)       |
| 17409       | CakSNP17409    | <i>Kabuli</i>    | Ca_Kabuli_denovo             | 265972                         | (A/G)       |
| 17410       | CakSNP17410    | <i>Kabuli</i>    | Ca_Kabuli_denovo             | 268126                         | (G/T)       |
| 17411       | CakSNP17411    | <i>Kabuli</i>    | Ca_Kabuli_denovo             | 268171                         | (T/C)       |
| 17412       | CakSNP17412    | <i>Kabuli</i>    | Ca_Kabuli_denovo             | 273531                         | (A/G)       |
| 17413       | CakSNP17413    | <i>Kabuli</i>    | Ca_Kabuli_denovo             | 273541                         | (C/G)       |
| 17414       | CakSNP17414    | <i>Kabuli</i>    | Ca_Kabuli_denovo             | 273543                         | (G/C)       |
| 17415       | CakSNP17415    | <i>Kabuli</i>    | Ca_Kabuli_denovo             | 275658                         | (T/G)       |
| 17416       | CakSNP17416    | <i>Kabuli</i>    | Ca_Kabuli_denovo             | 275671                         | (A/G)       |
| 17417       | CakSNP17417    | <i>Kabuli</i>    | Ca_Kabuli_denovo             | 275698                         | (T/G)       |
| 17418       | CakSNP17418    | <i>Kabuli</i>    | Ca_Kabuli_denovo             | 281765                         | (C/G)       |
| 17419       | CakSNP17419    | <i>Kabuli</i>    | Ca_Kabuli_denovo             | 281766                         | (G/C)       |
| 17420       | CakSNP17420    | <i>Kabuli</i>    | Ca_Kabuli_denovo             | 281767                         | (G/A)       |
| 17421       | CakSNP17421    | <i>Kabuli</i>    | Ca_Kabuli_denovo             | 281768                         | (T/G)       |
| 17422       | CakSNP17422    | <i>Kabuli</i>    | Ca_Kabuli_denovo             | 281769                         | (T/G)       |
| 17423       | CakSNP17423    | <i>Kabuli</i>    | Ca_Kabuli_denovo             | 281770                         | (A/C)       |
| 17424       | CakSNP17424    | <i>Kabuli</i>    | Ca_Kabuli_denovo             | 290341                         | (T/A)       |
| 17425       | CakSNP17425    | <i>Kabuli</i>    | Ca_Kabuli_denovo             | 290342                         | (T/G)       |
| 17426       | CakSNP17426    | <i>Kabuli</i>    | Ca_Kabuli_denovo             | 290344                         | (C/T)       |
| 17427       | CakSNP17427    | <i>Kabuli</i>    | Ca_Kabuli_denovo             | 290345                         | (G/T)       |
| 17428       | CakSNP17428    | <i>Kabuli</i>    | Ca_Kabuli_denovo             | 299355                         | (A/T)       |
| 17429       | CakSNP17429    | <i>Kabuli</i>    | Ca_Kabuli_denovo             | 299356                         | (C/T)       |
| 17430       | CakSNP17430    | <i>Kabuli</i>    | Ca_Kabuli_denovo             | 300954                         | (A/G)       |
| 17431       | CakSNP17431    | <i>Kabuli</i>    | Ca_Kabuli_denovo             | 300963                         | (A/G)       |
| 17432       | CakSNP17432    | <i>Kabuli</i>    | Ca_Kabuli_denovo             | 300979                         | (A/G)       |
| 17433       | CakSNP17433    | <i>Kabuli</i>    | Ca_Kabuli_denovo             | 300980                         | (T/G)       |
| 17434       | CakSNP17434    | <i>Kabuli</i>    | Ca_Kabuli_denovo             | 300982                         | (T/G)       |
| 17435       | CakSNP17435    | <i>Kabuli</i>    | Ca_Kabuli_denovo             | 300994                         | (A/G)       |
| 17436       | CakSNP17436    | <i>Kabuli</i>    | Ca_Kabuli_denovo             | 301008                         | (A/G)       |
| 17437       | CakSNP17437    | <i>Kabuli</i>    | Ca_Kabuli_denovo             | 301011                         | (C/G)       |
| 17438       | CakSNP17438    | <i>Kabuli</i>    | Ca_Kabuli_denovo             | 301012                         | (C/G)       |
| 17439       | CakSNP17439    | <i>Kabuli</i>    | Ca_Kabuli_denovo             | 301021                         | (A/G)       |
| 17440       | CakSNP17440    | <i>Kabuli</i>    | Ca_Kabuli_denovo             | 301027                         | (A/G)       |
| 17441       | CakSNP17441    | <i>Kabuli</i>    | Ca_Kabuli_denovo             | 301037                         | (A/G)       |

| <b>S.N.</b> | <b>SNP IDs</b> | <b>Cultivars</b> | <b>Chromosomes/scaffolds</b> | <b>Physical positions (bp)</b> | <b>SNPs</b> |
|-------------|----------------|------------------|------------------------------|--------------------------------|-------------|
| 17442       | CakSNP17442    | <i>Kabuli</i>    | Ca_Kabuli_denovo             | 305833                         | (T/G)       |
| 17443       | CakSNP17443    | <i>Kabuli</i>    | Ca_Kabuli_denovo             | 309250                         | (C/G)       |
| 17444       | CakSNP17444    | <i>Kabuli</i>    | Ca_Kabuli_denovo             | 309283                         | (A/G)       |
| 17445       | CakSNP17445    | <i>Kabuli</i>    | Ca_Kabuli_denovo             | 309293                         | (C/G)       |
| 17446       | CakSNP17446    | <i>Kabuli</i>    | Ca_Kabuli_denovo             | 312821                         | (A/G)       |
| 17447       | CakSNP17447    | <i>Kabuli</i>    | Ca_Kabuli_denovo             | 313026                         | (T/G)       |
| 17448       | CakSNP17448    | <i>Kabuli</i>    | Ca_Kabuli_denovo             | 313030                         | (G/C)       |
| 17449       | CakSNP17449    | <i>Kabuli</i>    | Ca_Kabuli_denovo             | 313032                         | (A/G)       |
| 17450       | CakSNP17450    | <i>Kabuli</i>    | Ca_Kabuli_denovo             | 313033                         | (T/G)       |
| 17451       | CakSNP17451    | <i>Kabuli</i>    | Ca_Kabuli_denovo             | 313034                         | (G/A)       |
| 17452       | CakSNP17452    | <i>Kabuli</i>    | Ca_Kabuli_denovo             | 315534                         | (G/C)       |
| 17453       | CakSNP17453    | <i>Kabuli</i>    | Ca_Kabuli_denovo             | 315535                         | (C/G)       |
| 17454       | CakSNP17454    | <i>Kabuli</i>    | Ca_Kabuli_denovo             | 316184                         | (G/C)       |
| 17455       | CakSNP17455    | <i>Kabuli</i>    | Ca_Kabuli_denovo             | 319444                         | (A/G)       |
| 17456       | CakSNP17456    | <i>Kabuli</i>    | Ca_Kabuli_denovo             | 324057                         | (T/G)       |
| 17457       | CakSNP17457    | <i>Kabuli</i>    | Ca_Kabuli_denovo             | 325498                         | (A/G)       |
| 17458       | CakSNP17458    | <i>Kabuli</i>    | Ca_Kabuli_denovo             | 325500                         | (G/A)       |
| 17459       | CakSNP17459    | <i>Kabuli</i>    | Ca_Kabuli_denovo             | 327160                         | (G/A)       |
| 17460       | CakSNP17460    | <i>Kabuli</i>    | Ca_Kabuli_denovo             | 327161                         | (A/T)       |
| 17461       | CakSNP17461    | <i>Kabuli</i>    | Ca_Kabuli_denovo             | 327162                         | (G/A)       |
| 17462       | CakSNP17462    | <i>Kabuli</i>    | Ca_Kabuli_denovo             | 328553                         | (A/G)       |
| 17463       | CakSNP17463    | <i>Kabuli</i>    | Ca_Kabuli_denovo             | 328554                         | (A/G)       |
| 17464       | CakSNP17464    | <i>Kabuli</i>    | Ca_Kabuli_denovo             | 328555                         | (G/T)       |
| 17465       | CakSNP17465    | <i>Kabuli</i>    | Ca_Kabuli_denovo             | 328556                         | (A/C)       |
| 17466       | CakSNP17466    | <i>Kabuli</i>    | Ca_Kabuli_denovo             | 328867                         | (G/A)       |
| 17467       | CakSNP17467    | <i>Kabuli</i>    | Ca_Kabuli_denovo             | 328887                         | (A/G)       |
| 17468       | CakSNP17468    | <i>Kabuli</i>    | Ca_Kabuli_denovo             | 328899                         | (A/C)       |
| 17469       | CakSNP17469    | <i>Kabuli</i>    | Ca_Kabuli_denovo             | 328908                         | (C/A)       |
| 17470       | CakSNP17470    | <i>Kabuli</i>    | Ca_Kabuli_denovo             | 329973                         | (C/A)       |
| 17471       | CakSNP17471    | <i>Kabuli</i>    | Ca_Kabuli_denovo             | 329977                         | (A/G)       |
| 17472       | CakSNP17472    | <i>Kabuli</i>    | Ca_Kabuli_denovo             | 329986                         | (A/G)       |
| 17473       | CakSNP17473    | <i>Kabuli</i>    | Ca_Kabuli_denovo             | 329993                         | (T/G)       |
| 17474       | CakSNP17474    | <i>Kabuli</i>    | Ca_Kabuli_denovo             | 329999                         | (G/A)       |
| 17475       | CakSNP17475    | <i>Kabuli</i>    | Ca_Kabuli_denovo             | 330000                         | (A/G)       |
| 17476       | CakSNP17476    | <i>Kabuli</i>    | Ca_Kabuli_denovo             | 332747                         | (G/T)       |
| 17477       | CakSNP17477    | <i>Kabuli</i>    | Ca_Kabuli_denovo             | 332748                         | (A/C)       |
| 17478       | CakSNP17478    | <i>Kabuli</i>    | Ca_Kabuli_denovo             | 332751                         | (G/C)       |
| 17479       | CakSNP17479    | <i>Kabuli</i>    | Ca_Kabuli_denovo             | 332755                         | (G/C)       |

| <b>S.N.</b> | <b>SNP IDs</b> | <b>Cultivars</b> | <b>Chromosomes/scaffolds</b> | <b>Physical positions (bp)</b> | <b>SNPs</b> |
|-------------|----------------|------------------|------------------------------|--------------------------------|-------------|
| 17480       | CakSNP17480    | <i>Kabuli</i>    | Ca_Kabuli_denovo             | 337250                         | (T/C)       |
| 17481       | CakSNP17481    | <i>Kabuli</i>    | Ca_Kabuli_denovo             | 337257                         | (T/G)       |
| 17482       | CakSNP17482    | <i>Kabuli</i>    | Ca_Kabuli_denovo             | 337269                         | (T/G)       |
| 17483       | CakSNP17483    | <i>Kabuli</i>    | Ca_Kabuli_denovo             | 337289                         | (T/G)       |
| 17484       | CakSNP17484    | <i>Kabuli</i>    | Ca_Kabuli_denovo             | 337405                         | (T/C)       |
| 17485       | CakSNP17485    | <i>Kabuli</i>    | Ca_Kabuli_denovo             | 341733                         | (T/G)       |
| 17486       | CakSNP17486    | <i>Kabuli</i>    | Ca_Kabuli_denovo             | 341774                         | (A/G)       |
| 17487       | CakSNP17487    | <i>Kabuli</i>    | Ca_Kabuli_denovo             | 348683                         | (C/A)       |
| 17488       | CakSNP17488    | <i>Kabuli</i>    | Ca_Kabuli_denovo             | 348717                         | (C/G)       |
| 17489       | CakSNP17489    | <i>Kabuli</i>    | Ca_Kabuli_denovo             | 352430                         | (T/G)       |
| 17490       | CakSNP17490    | <i>Kabuli</i>    | Ca_Kabuli_denovo             | 352452                         | (T/G)       |
| 17491       | CakSNP17491    | <i>Kabuli</i>    | Ca_Kabuli_denovo             | 352471                         | (C/A)       |
| 17492       | CakSNP17492    | <i>Kabuli</i>    | Ca_Kabuli_denovo             | 356259                         | (G/A)       |
| 17493       | CakSNP17493    | <i>Kabuli</i>    | Ca_Kabuli_denovo             | 356260                         | (G/A)       |
| 17494       | CakSNP17494    | <i>Kabuli</i>    | Ca_Kabuli_denovo             | 356262                         | (T/G)       |
| 17495       | CakSNP17495    | <i>Kabuli</i>    | Ca_Kabuli_denovo             | 356264                         | (A/C)       |
| 17496       | CakSNP17496    | <i>Kabuli</i>    | Ca_Kabuli_denovo             | 356266                         | (A/C)       |
| 17497       | CakSNP17497    | <i>Kabuli</i>    | Ca_Kabuli_denovo             | 356835                         | (G/A)       |
| 17498       | CakSNP17498    | <i>Kabuli</i>    | Ca_Kabuli_denovo             | 356836                         | (T/A)       |
| 17499       | CakSNP17499    | <i>Kabuli</i>    | Ca_Kabuli_denovo             | 357513                         | (C/A)       |
| 17500       | CakSNP17500    | <i>Kabuli</i>    | Ca_Kabuli_denovo             | 357533                         | (T/G)       |
| 17501       | CakSNP17501    | <i>Kabuli</i>    | Ca_Kabuli_denovo             | 357578                         | (G/C)       |
| 17502       | CakSNP17502    | <i>Kabuli</i>    | Ca_Kabuli_denovo             | 357580                         | (G/A)       |
| 17503       | CakSNP17503    | <i>Kabuli</i>    | Ca_Kabuli_denovo             | 357581                         | (A/T)       |
| 17504       | CakSNP17504    | <i>Kabuli</i>    | Ca_Kabuli_denovo             | 357582                         | (C/A)       |
| 17505       | CakSNP17505    | <i>Kabuli</i>    | Ca_Kabuli_denovo             | 357583                         | (T/C)       |
| 17506       | CakSNP17506    | <i>Kabuli</i>    | Ca_Kabuli_denovo             | 357584                         | (C/G)       |
| 17507       | CakSNP17507    | <i>Kabuli</i>    | Ca_Kabuli_denovo             | 357585                         | (G/T)       |
| 17508       | CakSNP17508    | <i>Kabuli</i>    | Ca_Kabuli_denovo             | 357586                         | (T/C)       |
| 17509       | CakSNP17509    | <i>Kabuli</i>    | Ca_Kabuli_denovo             | 358284                         | (T/G)       |
| 17510       | CakSNP17510    | <i>Kabuli</i>    | Ca_Kabuli_denovo             | 358878                         | (C/G)       |
| 17511       | CakSNP17511    | <i>Kabuli</i>    | Ca_Kabuli_denovo             | 358879                         | (A/C)       |
| 17512       | CakSNP17512    | <i>Kabuli</i>    | Ca_Kabuli_denovo             | 358882                         | (C/G)       |
| 17513       | CakSNP17513    | <i>Kabuli</i>    | Ca_Kabuli_denovo             | 359691                         | (C/G)       |
| 17514       | CakSNP17514    | <i>Kabuli</i>    | Ca_Kabuli_denovo             | 359693                         | (G/A)       |
| 17515       | CakSNP17515    | <i>Kabuli</i>    | Ca_Kabuli_denovo             | 359695                         | (A/G)       |
| 17516       | CakSNP17516    | <i>Kabuli</i>    | Ca_Kabuli_denovo             | 359696                         | (G/A)       |
| 17517       | CakSNP17517    | <i>Kabuli</i>    | Ca_Kabuli_denovo             | 359697                         | (A/G)       |

| <b>S.N.</b> | <b>SNP IDs</b> | <b>Cultivars</b> | <b>Chromosomes/scaffolds</b> | <b>Physical positions (bp)</b> | <b>SNPs</b> |
|-------------|----------------|------------------|------------------------------|--------------------------------|-------------|
| 17518       | CakSNP17518    | <i>Kabuli</i>    | Ca_Kabuli_denovo             | 359698                         | (G/C)       |
| 17519       | CakSNP17519    | <i>Kabuli</i>    | Ca_Kabuli_denovo             | 359699                         | (C/G)       |
| 17520       | CakSNP17520    | <i>Kabuli</i>    | Ca_Kabuli_denovo             | 359701                         | (G/T)       |
| 17521       | CakSNP17521    | <i>Kabuli</i>    | Ca_Kabuli_denovo             | 359703                         | (T/C)       |
| 17522       | CakSNP17522    | <i>Kabuli</i>    | Ca_Kabuli_denovo             | 359704                         | (C/A)       |
| 17523       | CakSNP17523    | <i>Kabuli</i>    | Ca_Kabuli_denovo             | 359705                         | (A/G)       |
| 17524       | CakSNP17524    | <i>Kabuli</i>    | Ca_Kabuli_denovo             | 359706                         | (G/C)       |
| 17525       | CakSNP17525    | <i>Kabuli</i>    | Ca_Kabuli_denovo             | 359707                         | (C/A)       |
| 17526       | CakSNP17526    | <i>Kabuli</i>    | Ca_Kabuli_denovo             | 359708                         | (A/G)       |
| 17527       | CakSNP17527    | <i>Kabuli</i>    | Ca_Kabuli_denovo             | 359710                         | (G/A)       |
| 17528       | CakSNP17528    | <i>Kabuli</i>    | Ca_Kabuli_denovo             | 359712                         | (A/T)       |
| 17529       | CakSNP17529    | <i>Kabuli</i>    | Ca_Kabuli_denovo             | 359713                         | (T/G)       |
| 17530       | CakSNP17530    | <i>Kabuli</i>    | Ca_Kabuli_denovo             | 359714                         | (G/C)       |
| 17531       | CakSNP17531    | <i>Kabuli</i>    | Ca_Kabuli_denovo             | 359716                         | (C/G)       |
| 17532       | CakSNP17532    | <i>Kabuli</i>    | Ca_Kabuli_denovo             | 359717                         | (G/A)       |
| 17533       | CakSNP17533    | <i>Kabuli</i>    | Ca_Kabuli_denovo             | 359718                         | (A/G)       |
| 17534       | CakSNP17534    | <i>Kabuli</i>    | Ca_Kabuli_denovo             | 359719                         | (G/A)       |
| 17535       | CakSNP17535    | <i>Kabuli</i>    | Ca_Kabuli_denovo             | 359720                         | (A/C)       |
| 17536       | CakSNP17536    | <i>Kabuli</i>    | Ca_Kabuli_denovo             | 359722                         | (C/G)       |
| 17537       | CakSNP17537    | <i>Kabuli</i>    | Ca_Kabuli_denovo             | 359724                         | (G/T)       |
| 17538       | CakSNP17538    | <i>Kabuli</i>    | Ca_Kabuli_denovo             | 359725                         | (A/C)       |
| 17539       | CakSNP17539    | <i>Kabuli</i>    | Ca_Kabuli_denovo             | 364778                         | (T/G)       |
| 17540       | CakSNP17540    | <i>Kabuli</i>    | Ca_Kabuli_denovo             | 364839                         | (A/C)       |
| 17541       | CakSNP17541    | <i>Kabuli</i>    | Ca_Kabuli_denovo             | 366496                         | (A/G)       |
| 17542       | CakSNP17542    | <i>Kabuli</i>    | Ca_Kabuli_denovo             | 366498                         | (C/A)       |
| 17543       | CakSNP17543    | <i>Kabuli</i>    | Ca_Kabuli_denovo             | 369650                         | (A/G)       |
| 17544       | CakSNP17544    | <i>Kabuli</i>    | Ca_Kabuli_denovo             | 375270                         | (G/A)       |
| 17545       | CakSNP17545    | <i>Kabuli</i>    | Ca_Kabuli_denovo             | 375282                         | (T/G)       |
| 17546       | CakSNP17546    | <i>Kabuli</i>    | Ca_Kabuli_denovo             | 381255                         | (T/G)       |
| 17547       | CakSNP17547    | <i>Kabuli</i>    | Ca_Kabuli_denovo             | 381258                         | (T/G)       |
| 17548       | CakSNP17548    | <i>Kabuli</i>    | Ca_Kabuli_denovo             | 381275                         | (T/G)       |
| 17549       | CakSNP17549    | <i>Kabuli</i>    | Ca_Kabuli_denovo             | 382497                         | (G/A)       |
| 17550       | CakSNP17550    | <i>Kabuli</i>    | Ca_Kabuli_denovo             | 386867                         | (G/C)       |
| 17551       | CakSNP17551    | <i>Kabuli</i>    | Ca_Kabuli_denovo             | 386970                         | (G/C)       |
| 17552       | CakSNP17552    | <i>Kabuli</i>    | Ca_Kabuli_denovo             | 389031                         | (T/G)       |
| 17553       | CakSNP17553    | <i>Kabuli</i>    | Ca_Kabuli_denovo             | 389037                         | (A/G)       |
| 17554       | CakSNP17554    | <i>Kabuli</i>    | Ca_Kabuli_denovo             | 389049                         | (C/G)       |
| 17555       | CakSNP17555    | <i>Kabuli</i>    | Ca_Kabuli_denovo             | 389058                         | (T/G)       |



| <b>S.N.</b> | <b>SNP IDs</b> | <b>Cultivars</b> | <b>Chromosomes/scaffolds</b> | <b>Physical positions (bp)</b> | <b>SNPs</b> |
|-------------|----------------|------------------|------------------------------|--------------------------------|-------------|
| 17556       | CakSNP17556    | <i>Kabuli</i>    | Ca_Kabuli_denovo             | 389063                         | (T/G)       |
| 17557       | CakSNP17557    | <i>Kabuli</i>    | Ca_Kabuli_denovo             | 389071                         | (C/G)       |
| 17558       | CakSNP17558    | <i>Kabuli</i>    | Ca_Kabuli_denovo             | 389076                         | (A/G)       |
| 17559       | CakSNP17559    | <i>Kabuli</i>    | Ca_Kabuli_denovo             | 389084                         | (C/G)       |
| 17560       | CakSNP17560    | <i>Kabuli</i>    | Ca_Kabuli_denovo             | 392493                         | (T/G)       |
| 17561       | CakSNP17561    | <i>Kabuli</i>    | Ca_Kabuli_denovo             | 396462                         | (A/T)       |
| 17562       | CakSNP17562    | <i>Kabuli</i>    | Ca_Kabuli_denovo             | 396485                         | (T/G)       |
| 17563       | CakSNP17563    | <i>Kabuli</i>    | Ca_Kabuli_denovo             | 396487                         | (T/G)       |
| 17564       | CakSNP17564    | <i>Kabuli</i>    | Ca_Kabuli_denovo             | 396520                         | (T/G)       |
| 17565       | CakSNP17565    | <i>Kabuli</i>    | Ca_Kabuli_denovo             | 396522                         | (T/G)       |
| 17566       | CakSNP17566    | <i>Kabuli</i>    | Ca_Kabuli_denovo             | 396537                         | (T/A)       |
| 17567       | CakSNP17567    | <i>Kabuli</i>    | Ca_Kabuli_denovo             | 401937                         | (C/G)       |
| 17568       | CakSNP17568    | <i>Kabuli</i>    | Ca_Kabuli_denovo             | 401939                         | (C/G)       |
| 17569       | CakSNP17569    | <i>Kabuli</i>    | Ca_Kabuli_denovo             | 401940                         | (G/A)       |
| 17570       | CakSNP17570    | <i>Kabuli</i>    | Ca_Kabuli_denovo             | 401941                         | (A/G)       |
| 17571       | CakSNP17571    | <i>Kabuli</i>    | Ca_Kabuli_denovo             | 405694                         | (G/C)       |
| 17572       | CakSNP17572    | <i>Kabuli</i>    | Ca_Kabuli_denovo             | 408057                         | (A/G)       |
| 17573       | CakSNP17573    | <i>Kabuli</i>    | Ca_Kabuli_denovo             | 408058                         | (T/G)       |
| 17574       | CakSNP17574    | <i>Kabuli</i>    | Ca_Kabuli_denovo             | 408059                         | (T/C)       |
| 17575       | CakSNP17575    | <i>Kabuli</i>    | Ca_Kabuli_denovo             | 408060                         | (C/G)       |
| 17576       | CakSNP17576    | <i>Kabuli</i>    | Ca_Kabuli_denovo             | 409398                         | (A/G)       |
| 17577       | CakSNP17577    | <i>Kabuli</i>    | Ca_Kabuli_denovo             | 409408                         | (C/G)       |
| 17578       | CakSNP17578    | <i>Kabuli</i>    | Ca_Kabuli_denovo             | 409485                         | (A/G)       |
| 17579       | CakSNP17579    | <i>Kabuli</i>    | Ca_Kabuli_denovo             | 409491                         | (A/G)       |
| 17580       | CakSNP17580    | <i>Kabuli</i>    | Ca_Kabuli_denovo             | 409503                         | (A/G)       |
| 17581       | CakSNP17581    | <i>Kabuli</i>    | Ca_Kabuli_denovo             | 409516                         | (C/A)       |
| 17582       | CakSNP17582    | <i>Kabuli</i>    | Ca_Kabuli_denovo             | 409517                         | (C/G)       |
| 17583       | CakSNP17583    | <i>Kabuli</i>    | Ca_Kabuli_denovo             | 409538                         | (T/G)       |
| 17584       | CakSNP17584    | <i>Kabuli</i>    | Ca_Kabuli_denovo             | 412542                         | (A/G)       |
| 17585       | CakSNP17585    | <i>Kabuli</i>    | Ca_Kabuli_denovo             | 412543                         | (G/C)       |
| 17586       | CakSNP17586    | <i>Kabuli</i>    | Ca_Kabuli_denovo             | 412544                         | (A/C)       |
| 17587       | CakSNP17587    | <i>Kabuli</i>    | Ca_Kabuli_denovo             | 412545                         | (G/A)       |
| 17588       | CakSNP17588    | <i>Kabuli</i>    | Ca_Kabuli_denovo             | 416852                         | (C/G)       |
| 17589       | CakSNP17589    | <i>Kabuli</i>    | Ca_Kabuli_denovo             | 416855                         | (T/G)       |
| 17590       | CakSNP17590    | <i>Kabuli</i>    | Ca_Kabuli_denovo             | 416876                         | (T/G)       |
| 17591       | CakSNP17591    | <i>Kabuli</i>    | Ca_Kabuli_denovo             | 416887                         | (A/G)       |
| 17592       | CakSNP17592    | <i>Kabuli</i>    | Ca_Kabuli_denovo             | 416915                         | (A/G)       |
| 17593       | CakSNP17593    | <i>Kabuli</i>    | Ca_Kabuli_denovo             | 416999                         | (A/T)       |

| <b>S.N.</b> | <b>SNP IDs</b> | <b>Cultivars</b> | <b>Chromosomes/scaffolds</b> | <b>Physical positions (bp)</b> | <b>SNPs</b> |
|-------------|----------------|------------------|------------------------------|--------------------------------|-------------|
| 17594       | CakSNP17594    | <i>Kabuli</i>    | Ca_Kabuli_denovo             | 417000                         | (A/C)       |
| 17595       | CakSNP17595    | <i>Kabuli</i>    | Ca_Kabuli_denovo             | 420045                         | (A/G)       |
| 17596       | CakSNP17596    | <i>Kabuli</i>    | Ca_Kabuli_denovo             | 420049                         | (A/G)       |
| 17597       | CakSNP17597    | <i>Kabuli</i>    | Ca_Kabuli_denovo             | 420278                         | (A/G)       |
| 17598       | CakSNP17598    | <i>Kabuli</i>    | Ca_Kabuli_denovo             | 420290                         | (C/G)       |
| 17599       | CakSNP17599    | <i>Kabuli</i>    | Ca_Kabuli_denovo             | 420297                         | (C/G)       |
| 17600       | CakSNP17600    | <i>Kabuli</i>    | Ca_Kabuli_denovo             | 420313                         | (A/G)       |
| 17601       | CakSNP17601    | <i>Kabuli</i>    | Ca_Kabuli_denovo             | 420318                         | (C/G)       |
| 17602       | CakSNP17602    | <i>Kabuli</i>    | Ca_Kabuli_denovo             | 420329                         | (A/G)       |
| 17603       | CakSNP17603    | <i>Kabuli</i>    | Ca_Kabuli_denovo             | 420360                         | (A/G)       |
| 17604       | CakSNP17604    | <i>Kabuli</i>    | Ca_Kabuli_denovo             | 422246                         | (C/G)       |
| 17605       | CakSNP17605    | <i>Kabuli</i>    | Ca_Kabuli_denovo             | 422283                         | (G/A)       |
| 17606       | CakSNP17606    | <i>Kabuli</i>    | Ca_Kabuli_denovo             | 422291                         | (T/G)       |
| 17607       | CakSNP17607    | <i>Kabuli</i>    | Ca_Kabuli_denovo             | 422304                         | (C/A)       |
| 17608       | CakSNP17608    | <i>Kabuli</i>    | Ca_Kabuli_denovo             | 425114                         | (A/G)       |
| 17609       | CakSNP17609    | <i>Kabuli</i>    | Ca_Kabuli_denovo             | 425192                         | (A/G)       |
| 17610       | CakSNP17610    | <i>Kabuli</i>    | Ca_Kabuli_denovo             | 427123                         | (T/G)       |
| 17611       | CakSNP17611    | <i>Kabuli</i>    | Ca_Kabuli_denovo             | 440472                         | (A/G)       |
| 17612       | CakSNP17612    | <i>Kabuli</i>    | Ca_Kabuli_denovo             | 441668                         | (T/G)       |
| 17613       | CakSNP17613    | <i>Kabuli</i>    | Ca_Kabuli_denovo             | 442080                         | (T/G)       |
| 17614       | CakSNP17614    | <i>Kabuli</i>    | Ca_Kabuli_denovo             | 442120                         | (T/C)       |
| 17615       | CakSNP17615    | <i>Kabuli</i>    | Ca_Kabuli_denovo             | 442121                         | (C/A)       |
| 17616       | CakSNP17616    | <i>Kabuli</i>    | Ca_Kabuli_denovo             | 442122                         | (T/A)       |
| 17617       | CakSNP17617    | <i>Kabuli</i>    | Ca_Kabuli_denovo             | 442213                         | (C/T)       |
| 17618       | CakSNP17618    | <i>Kabuli</i>    | Ca_Kabuli_denovo             | 442216                         | (C/T)       |
| 17619       | CakSNP17619    | <i>Kabuli</i>    | Ca_Kabuli_denovo             | 442391                         | (G/C)       |
| 17620       | CakSNP17620    | <i>Kabuli</i>    | Ca_Kabuli_denovo             | 442393                         | (C/G)       |
| 17621       | CakSNP17621    | <i>Kabuli</i>    | Ca_Kabuli_denovo             | 442394                         | (G/A)       |
| 17622       | CakSNP17622    | <i>Kabuli</i>    | Ca_Kabuli_denovo             | 442395                         | (G/A)       |
| 17623       | CakSNP17623    | <i>Kabuli</i>    | Ca_Kabuli_denovo             | 442398                         | (C/T)       |
| 17624       | CakSNP17624    | <i>Kabuli</i>    | Ca_Kabuli_denovo             | 442399                         | (G/C)       |
| 17625       | CakSNP17625    | <i>Kabuli</i>    | Ca_Kabuli_denovo             | 442400                         | (A/G)       |
| 17626       | CakSNP17626    | <i>Kabuli</i>    | Ca_Kabuli_denovo             | 442402                         | (C/A)       |
| 17627       | CakSNP17627    | <i>Kabuli</i>    | Ca_Kabuli_denovo             | 443991                         | (T/G)       |
| 17628       | CakSNP17628    | <i>Kabuli</i>    | Ca_Kabuli_denovo             | 444015                         | (T/C)       |
| 17629       | CakSNP17629    | <i>Kabuli</i>    | Ca_Kabuli_denovo             | 444023                         | (T/G)       |
| 17630       | CakSNP17630    | <i>Kabuli</i>    | Ca_Kabuli_denovo             | 444031                         | (A/G)       |
| 17631       | CakSNP17631    | <i>Kabuli</i>    | Ca_Kabuli_denovo             | 453291                         | (C/G)       |

| <b>S.N.</b> | <b>SNP IDs</b> | <b>Cultivars</b> | <b>Chromosomes/scaffolds</b> | <b>Physical positions (bp)</b> | <b>SNPs</b> |
|-------------|----------------|------------------|------------------------------|--------------------------------|-------------|
| 17632       | CakSNP17632    | <i>Kabuli</i>    | Ca_Kabuli_denovo             | 453300                         | (A/G)       |
| 17633       | CakSNP17633    | <i>Kabuli</i>    | Ca_Kabuli_denovo             | 453318                         | (A/G)       |
| 17634       | CakSNP17634    | <i>Kabuli</i>    | Ca_Kabuli_denovo             | 453861                         | (G/A)       |
| 17635       | CakSNP17635    | <i>Kabuli</i>    | Ca_Kabuli_denovo             | 453862                         | (G/A)       |
| 17636       | CakSNP17636    | <i>Kabuli</i>    | Ca_Kabuli_denovo             | 453900                         | (G/A)       |
| 17637       | CakSNP17637    | <i>Kabuli</i>    | Ca_Kabuli_denovo             | 454466                         | (C/G)       |
| 17638       | CakSNP17638    | <i>Kabuli</i>    | Ca_Kabuli_denovo             | 468460                         | (G/A)       |
| 17639       | CakSNP17639    | <i>Kabuli</i>    | Ca_Kabuli_denovo             | 469180                         | (A/G)       |
| 17640       | CakSNP17640    | <i>Kabuli</i>    | Ca_Kabuli_denovo             | 476805                         | (G/C)       |
| 17641       | CakSNP17641    | <i>Kabuli</i>    | Ca_Kabuli_denovo             | 476807                         | (C/G)       |
| 17642       | CakSNP17642    | <i>Kabuli</i>    | Ca_Kabuli_denovo             | 476808                         | (A/G)       |
| 17643       | CakSNP17643    | <i>Kabuli</i>    | Ca_Kabuli_denovo             | 476809                         | (G/A)       |
| 17644       | CakSNP17644    | <i>Kabuli</i>    | Ca_Kabuli_denovo             | 476811                         | (C/A)       |
| 17645       | CakSNP17645    | <i>Kabuli</i>    | Ca_Kabuli_denovo             | 479038                         | (C/A)       |
| 17646       | CakSNP17646    | <i>Kabuli</i>    | Ca_Kabuli_denovo             | 479043                         | (A/G)       |
| 17647       | CakSNP17647    | <i>Kabuli</i>    | Ca_Kabuli_denovo             | 489994                         | (T/G)       |
| 17648       | CakSNP17648    | <i>Kabuli</i>    | Ca_Kabuli_denovo             | 490709                         | (G/C)       |
| 17649       | CakSNP17649    | <i>Kabuli</i>    | Ca_Kabuli_denovo             | 490829                         | (C/A)       |
| 17650       | CakSNP17650    | <i>Kabuli</i>    | Ca_Kabuli_denovo             | 490851                         | (A/C)       |
| 17651       | CakSNP17651    | <i>Kabuli</i>    | Ca_Kabuli_denovo             | 490863                         | (T/G)       |
| 17652       | CakSNP17652    | <i>Kabuli</i>    | Ca_Kabuli_denovo             | 490944                         | (C/A)       |
| 17653       | CakSNP17653    | <i>Kabuli</i>    | Ca_Kabuli_denovo             | 490945                         | (A/T)       |
| 17654       | CakSNP17654    | <i>Kabuli</i>    | Ca_Kabuli_denovo             | 490946                         | (G/T)       |
| 17655       | CakSNP17655    | <i>Kabuli</i>    | Ca_Kabuli_denovo             | 490947                         | (A/C)       |
| 17656       | CakSNP17656    | <i>Kabuli</i>    | Ca_Kabuli_denovo             | 491027                         | (G/T)       |
| 17657       | CakSNP17657    | <i>Kabuli</i>    | Ca_Kabuli_denovo             | 492735                         | (A/T)       |
| 17658       | CakSNP17658    | <i>Kabuli</i>    | Ca_Kabuli_denovo             | 500805                         | (A/C)       |
| 17659       | CakSNP17659    | <i>Kabuli</i>    | Ca_Kabuli_denovo             | 504532                         | (T/G)       |
| 17660       | CakSNP17660    | <i>Kabuli</i>    | Ca_Kabuli_denovo             | 504535                         | (C/G)       |
| 17661       | CakSNP17661    | <i>Kabuli</i>    | Ca_Kabuli_denovo             | 504543                         | (T/G)       |
| 17662       | CakSNP17662    | <i>Kabuli</i>    | Ca_Kabuli_denovo             | 504570                         | (A/G)       |
| 17663       | CakSNP17663    | <i>Kabuli</i>    | Ca_Kabuli_denovo             | 504576                         | (T/G)       |
| 17664       | CakSNP17664    | <i>Kabuli</i>    | Ca_Kabuli_denovo             | 504608                         | (G/A)       |
| 17665       | CakSNP17665    | <i>Kabuli</i>    | Ca_Kabuli_denovo             | 504615                         | (C/T)       |
| 17666       | CakSNP17666    | <i>Kabuli</i>    | Ca_Kabuli_denovo             | 514036                         | (G/C)       |
| 17667       | CakSNP17667    | <i>Kabuli</i>    | Ca_Kabuli_denovo             | 514044                         | (T/C)       |
| 17668       | CakSNP17668    | <i>Kabuli</i>    | Ca_Kabuli_denovo             | 520412                         | (A/G)       |
| 17669       | CakSNP17669    | <i>Kabuli</i>    | Ca_Kabuli_denovo             | 520413                         | (G/A)       |

| <b>S.N.</b> | <b>SNP IDs</b> | <b>Cultivars</b> | <b>Chromosomes/scaffolds</b> | <b>Physical positions (bp)</b> | <b>SNPs</b> |
|-------------|----------------|------------------|------------------------------|--------------------------------|-------------|
| 17670       | CakSNP17670    | <i>Kabuli</i>    | Ca_Kabuli_denovo             | 520414                         | (G/T)       |
| 17671       | CakSNP17671    | <i>Kabuli</i>    | Ca_Kabuli_denovo             | 520415                         | (A/C)       |
| 17672       | CakSNP17672    | <i>Kabuli</i>    | Ca_Kabuli_denovo             | 520883                         | (G/A)       |
| 17673       | CakSNP17673    | <i>Kabuli</i>    | Ca_Kabuli_denovo             | 523230                         | (A/G)       |
| 17674       | CakSNP17674    | <i>Kabuli</i>    | Ca_Kabuli_denovo             | 523242                         | (T/A)       |
| 17675       | CakSNP17675    | <i>Kabuli</i>    | Ca_Kabuli_denovo             | 525830                         | (C/A)       |
| 17676       | CakSNP17676    | <i>Kabuli</i>    | Ca_Kabuli_denovo             | 525854                         | (T/A)       |
| 17677       | CakSNP17677    | <i>Kabuli</i>    | Ca_Kabuli_denovo             | 525877                         | (G/C)       |
| 17678       | CakSNP17678    | <i>Kabuli</i>    | Ca_Kabuli_denovo             | 533049                         | (A/T)       |
| 17679       | CakSNP17679    | <i>Kabuli</i>    | Ca_Kabuli_denovo             | 533050                         | (G/T)       |
| 17680       | CakSNP17680    | <i>Kabuli</i>    | Ca_Kabuli_denovo             | 533054                         | (C/T)       |
| 17681       | CakSNP17681    | <i>Kabuli</i>    | Ca_Kabuli_denovo             | 534272                         | (A/G)       |
| 17682       | CakSNP17682    | <i>Kabuli</i>    | Ca_Kabuli_denovo             | 554834                         | (G/C)       |
| 17683       | CakSNP17683    | <i>Kabuli</i>    | Ca_Kabuli_denovo             | 554836                         | (A/G)       |
| 17684       | CakSNP17684    | <i>Kabuli</i>    | Ca_Kabuli_denovo             | 554837                         | (G/A)       |
| 17685       | CakSNP17685    | <i>Kabuli</i>    | Ca_Kabuli_denovo             | 554838                         | (G/A)       |
| 17686       | CakSNP17686    | <i>Kabuli</i>    | Ca_Kabuli_denovo             | 554839                         | (A/G)       |
| 17687       | CakSNP17687    | <i>Kabuli</i>    | Ca_Kabuli_denovo             | 565001                         | (C/G)       |
| 17688       | CakSNP17688    | <i>Kabuli</i>    | Ca_Kabuli_denovo             | 565008                         | (T/G)       |
| 17689       | CakSNP17689    | <i>Kabuli</i>    | Ca_Kabuli_denovo             | 565056                         | (A/G)       |
| 17690       | CakSNP17690    | <i>Kabuli</i>    | Ca_Kabuli_denovo             | 565065                         | (C/G)       |
| 17691       | CakSNP17691    | <i>Kabuli</i>    | Ca_Kabuli_denovo             | 566223                         | (A/G)       |
| 17692       | CakSNP17692    | <i>Kabuli</i>    | Ca_Kabuli_denovo             | 566225                         | (T/G)       |
| 17693       | CakSNP17693    | <i>Kabuli</i>    | Ca_Kabuli_denovo             | 566238                         | (C/A)       |
| 17694       | CakSNP17694    | <i>Kabuli</i>    | Ca_Kabuli_denovo             | 566255                         | (T/C)       |
| 17695       | CakSNP17695    | <i>Kabuli</i>    | Ca_Kabuli_denovo             | 575792                         | (T/G)       |
| 17696       | CakSNP17696    | <i>Kabuli</i>    | Ca_Kabuli_denovo             | 575809                         | (A/G)       |
| 17697       | CakSNP17697    | <i>Kabuli</i>    | Ca_Kabuli_denovo             | 736077                         | (A/C)       |
| 17698       | CakSNP17698    | <i>Kabuli</i>    | Ca_Kabuli_denovo             | 861305                         | (T/C)       |
| 17699       | CakSNP17699    | <i>Kabuli</i>    | Ca_Kabuli_denovo             | 861308                         | (G/C)       |
| 17700       | CakSNP17700    | <i>Kabuli</i>    | Ca_Kabuli_denovo             | 930198                         | (T/A)       |
| 17701       | CakSNP17701    | <i>Kabuli</i>    | Ca_Kabuli_denovo             | 930227                         | (T/G)       |
| 17702       | CakSNP17702    | <i>Kabuli</i>    | Ca_Kabuli_denovo             | 930235                         | (A/G)       |
| 17703       | CakSNP17703    | <i>Kabuli</i>    | Ca_Kabuli_denovo             | 930257                         | (T/G)       |
| 17704       | CakSNP17704    | <i>Kabuli</i>    | Ca_Kabuli_denovo             | 930278                         | (G/C)       |
| 17705       | CakSNP17705    | <i>Kabuli</i>    | Ca_Kabuli_denovo             | 930279                         | (G/A)       |
| 17706       | CakSNP17706    | <i>Kabuli</i>    | Ca_Kabuli_denovo             | 933718                         | (C/A)       |
| 17707       | CakSNP17707    | <i>Kabuli</i>    | Ca_Kabuli_denovo             | 933719                         | (T/G)       |

| <b>S.N.</b> | <b>SNP IDs</b> | <b>Cultivars</b> | <b>Chromosomes/scaffolds</b> | <b>Physical positions (bp)</b> | <b>SNPs</b> |
|-------------|----------------|------------------|------------------------------|--------------------------------|-------------|
| 17708       | CakSNP17708    | <i>Kabuli</i>    | Ca_Kabuli_denovo             | 933720                         | (C/A)       |
| 17709       | CakSNP17709    | <i>Kabuli</i>    | Ca_Kabuli_denovo             | 965223                         | (A/G)       |
| 17710       | CakSNP17710    | <i>Kabuli</i>    | Ca_Kabuli_denovo             | 1158419                        | (G/C)       |
| 17711       | CakSNP17711    | <i>Kabuli</i>    | Ca_Kabuli_denovo             | 1158466                        | (C/G)       |
| 17712       | CakSNP17712    | <i>Kabuli</i>    | Ca_Kabuli_denovo             | 1188058                        | (C/A)       |
| 17713       | CakSNP17713    | <i>Kabuli</i>    | Ca_Kabuli_denovo             | 1188059                        | (A/C)       |
| 17714       | CakSNP17714    | <i>Kabuli</i>    | Ca_Kabuli_denovo             | 1188060                        | (G/C)       |
| 17715       | CakSNP17715    | <i>Kabuli</i>    | Ca_Kabuli_denovo             | 1188063                        | (T/A)       |
| 17716       | CakSNP17716    | <i>Kabuli</i>    | Ca_Kabuli_denovo             | 1188064                        | (C/T)       |
| 17717       | CakSNP17717    | <i>Kabuli</i>    | Ca_Kabuli_denovo             | 1286765                        | (C/A)       |
| 17718       | CakSNP17718    | <i>Kabuli</i>    | Ca_Kabuli_denovo             | 1286799                        | (T/G)       |
| 17719       | CakSNP17719    | <i>Kabuli</i>    | Ca_Kabuli_denovo             | 1286839                        | (C/A)       |
| 17720       | CakSNP17720    | <i>Kabuli</i>    | Ca_Kabuli_denovo             | 1286848                        | (T/G)       |
| 17721       | CakSNP17721    | <i>Kabuli</i>    | Ca_Kabuli_denovo             | 1286873                        | (T/A)       |
| 17722       | CakSNP17722    | <i>Kabuli</i>    | Ca_Kabuli_denovo             | 1286885                        | (A/G)       |
| 17723       | CakSNP17723    | <i>Kabuli</i>    | Ca_Kabuli_denovo             | 1286892                        | (T/G)       |
| 17724       | CakSNP17724    | <i>Kabuli</i>    | Ca_Kabuli_denovo             | 1286899                        | (A/G)       |
| 17725       | CakSNP17725    | <i>Kabuli</i>    | Ca_Kabuli_denovo             | 1286901                        | (C/A)       |
| 17726       | CakSNP17726    | <i>Kabuli</i>    | Ca_Kabuli_denovo             | 1541967                        | (C/G)       |
| 17727       | CakSNP17727    | <i>Kabuli</i>    | Ca_Kabuli_denovo             | 1542153                        | (T/G)       |
| 17728       | CakSNP17728    | <i>Kabuli</i>    | Ca_Kabuli_denovo             | 1602962                        | (T/A)       |
| 17729       | CakSNP17729    | <i>Kabuli</i>    | Ca_Kabuli_denovo             | 1603019                        | (T/C)       |
| 17730       | CakSNP17730    | <i>Kabuli</i>    | Ca_Kabuli_denovo             | 1603020                        | (T/A)       |
| 17731       | CakSNP17731    | <i>Kabuli</i>    | Ca_Kabuli_denovo             | 1603038                        | (A/C)       |
| 17732       | CakSNP17732    | <i>Kabuli</i>    | Ca_Kabuli_denovo             | 1603067                        | (C/G)       |
| 17733       | CakSNP17733    | <i>Kabuli</i>    | Ca_Kabuli_denovo             | 1603073                        | (G/T)       |
| 17734       | CakSNP17734    | <i>Kabuli</i>    | Ca_Kabuli_denovo             | 1603120                        | (G/C)       |
| 17735       | CakSNP17735    | <i>Kabuli</i>    | Ca_Kabuli_denovo             | 1604436                        | (A/G)       |
| 17736       | CakSNP17736    | <i>Kabuli</i>    | Ca_Kabuli_denovo             | 1604633                        | (G/A)       |
| 17737       | CakSNP17737    | <i>Kabuli</i>    | Ca_Kabuli_denovo             | 1604645                        | (G/A)       |
| 17738       | CakSNP17738    | <i>Kabuli</i>    | Ca_Kabuli_denovo             | 1604682                        | (T/G)       |
| 17739       | CakSNP17739    | <i>Kabuli</i>    | Ca_Kabuli_denovo             | 1607526                        | (A/G)       |
| 17740       | CakSNP17740    | <i>Kabuli</i>    | Ca_Kabuli_denovo             | 1621430                        | (C/G)       |
| 17741       | CakSNP17741    | <i>Kabuli</i>    | Ca_Kabuli_denovo             | 1621431                        | (C/G)       |
| 17742       | CakSNP17742    | <i>Kabuli</i>    | Ca_Kabuli_denovo             | 1622000                        | (T/A)       |
| 17743       | CakSNP17743    | <i>Kabuli</i>    | Ca_Kabuli_denovo             | 1622001                        | (T/G)       |
| 17744       | CakSNP17744    | <i>Kabuli</i>    | Ca_Kabuli_denovo             | 1622005                        | (G/C)       |
| 17745       | CakSNP17745    | <i>Kabuli</i>    | Ca_Kabuli_denovo             | 1627804                        | (A/G)       |

| <b>S.N.</b> | <b>SNP IDs</b> | <b>Cultivars</b> | <b>Chromosomes/scaffolds</b> | <b>Physical positions (bp)</b> | <b>SNPs</b> |
|-------------|----------------|------------------|------------------------------|--------------------------------|-------------|
| 17746       | CakSNP17746    | <i>Kabuli</i>    | Ca_Kabuli_denovo             | 1627832                        | (C/G)       |
| 17747       | CakSNP17747    | <i>Kabuli</i>    | Ca_Kabuli_denovo             | 1627845                        | (C/G)       |
| 17748       | CakSNP17748    | <i>Kabuli</i>    | Ca_Kabuli_denovo             | 1629193                        | (C/G)       |
| 17749       | CakSNP17749    | <i>Kabuli</i>    | Ca_Kabuli_denovo             | 1629194                        | (G/T)       |
| 17750       | CakSNP17750    | <i>Kabuli</i>    | Ca_Kabuli_denovo             | 1629209                        | (C/G)       |
| 17751       | CakSNP17751    | <i>Kabuli</i>    | Ca_Kabuli_denovo             | 1629225                        | (T/G)       |
| 17752       | CakSNP17752    | <i>Kabuli</i>    | Ca_Kabuli_denovo             | 1645344                        | (A/C)       |
| 17753       | CakSNP17753    | <i>Kabuli</i>    | Ca_Kabuli_denovo             | 1646822                        | (T/A)       |
| 17754       | CakSNP17754    | <i>Kabuli</i>    | Ca_Kabuli_denovo             | 1646824                        | (C/G)       |
| 17755       | CakSNP17755    | <i>Kabuli</i>    | Ca_Kabuli_denovo             | 1646825                        | (C/A)       |
| 17756       | CakSNP17756    | <i>Kabuli</i>    | Ca_Kabuli_denovo             | 1646826                        | (C/G)       |
| 17757       | CakSNP17757    | <i>Kabuli</i>    | Ca_Kabuli_denovo             | 1651702                        | (C/G)       |
| 17758       | CakSNP17758    | <i>Kabuli</i>    | Ca_Kabuli_denovo             | 1651703                        | (G/A)       |
| 17759       | CakSNP17759    | <i>Kabuli</i>    | Ca_Kabuli_denovo             | 1651738                        | (A/G)       |
| 17760       | CakSNP17760    | <i>Kabuli</i>    | Ca_Kabuli_denovo             | 1657001                        | (C/G)       |
| 17761       | CakSNP17761    | <i>Kabuli</i>    | Ca_Kabuli_denovo             | 1657040                        | (T/G)       |
| 17762       | CakSNP17762    | <i>Kabuli</i>    | Ca_Kabuli_denovo             | 1662755                        | (C/G)       |
| 17763       | CakSNP17763    | <i>Kabuli</i>    | Ca_Kabuli_denovo             | 1662758                        | (A/G)       |
| 17764       | CakSNP17764    | <i>Kabuli</i>    | Ca_Kabuli_denovo             | 1662759                        | (T/G)       |
| 17765       | CakSNP17765    | <i>Kabuli</i>    | Ca_Kabuli_denovo             | 1662766                        | (G/A)       |
| 17766       | CakSNP17766    | <i>Kabuli</i>    | Ca_Kabuli_denovo             | 1662768                        | (A/G)       |
| 17767       | CakSNP17767    | <i>Kabuli</i>    | Ca_Kabuli_denovo             | 1662796                        | (G/A)       |
| 17768       | CakSNP17768    | <i>Kabuli</i>    | Ca_Kabuli_denovo             | 1664534                        | (T/G)       |
| 17769       | CakSNP17769    | <i>Kabuli</i>    | Ca_Kabuli_denovo             | 1664562                        | (T/G)       |
| 17770       | CakSNP17770    | <i>Kabuli</i>    | Ca_Kabuli_denovo             | 1664573                        | (A/G)       |
| 17771       | CakSNP17771    | <i>Kabuli</i>    | Ca_Kabuli_denovo             | 1665734                        | (A/G)       |
| 17772       | CakSNP17772    | <i>Kabuli</i>    | Ca_Kabuli_denovo             | 1665742                        | (G/A)       |
| 17773       | CakSNP17773    | <i>Kabuli</i>    | Ca_Kabuli_denovo             | 1665774                        | (C/G)       |
| 17774       | CakSNP17774    | <i>Kabuli</i>    | Ca_Kabuli_denovo             | 1665815                        | (T/G)       |
| 17775       | CakSNP17775    | <i>Kabuli</i>    | Ca_Kabuli_denovo             | 1670929                        | (C/T)       |
| 17776       | CakSNP17776    | <i>Kabuli</i>    | Ca_Kabuli_denovo             | 1670930                        | (C/G)       |
| 17777       | CakSNP17777    | <i>Kabuli</i>    | Ca_Kabuli_denovo             | 1670931                        | (G/C)       |
| 17778       | CakSNP17778    | <i>Kabuli</i>    | Ca_Kabuli_denovo             | 1670932                        | (A/C)       |
| 17779       | CakSNP17779    | <i>Kabuli</i>    | Ca_Kabuli_denovo             | 1674472                        | (T/G)       |
| 17780       | CakSNP17780    | <i>Kabuli</i>    | Ca_Kabuli_denovo             | 1674473                        | (T/G)       |
| 17781       | CakSNP17781    | <i>Kabuli</i>    | Ca_Kabuli_denovo             | 1674498                        | (G/A)       |
| 17782       | CakSNP17782    | <i>Kabuli</i>    | Ca_Kabuli_denovo             | 1674513                        | (A/G)       |
| 17783       | CakSNP17783    | <i>Kabuli</i>    | Ca_Kabuli_denovo             | 1674786                        | (T/G)       |

| <b>S.N.</b> | <b>SNP IDs</b> | <b>Cultivars</b> | <b>Chromosomes/scaffolds</b> | <b>Physical positions (bp)</b> | <b>SNPs</b> |
|-------------|----------------|------------------|------------------------------|--------------------------------|-------------|
| 17784       | CakSNP17784    | <i>Kabuli</i>    | Ca_Kabuli_denovo             | 1674794                        | (G/T)       |
| 17785       | CakSNP17785    | <i>Kabuli</i>    | Ca_Kabuli_denovo             | 1674824                        | (T/G)       |
| 17786       | CakSNP17786    | <i>Kabuli</i>    | Ca_Kabuli_denovo             | 1676619                        | (A/C)       |
| 17787       | CakSNP17787    | <i>Kabuli</i>    | Ca_Kabuli_denovo             | 1676622                        | (C/A)       |
| 17788       | CakSNP17788    | <i>Kabuli</i>    | Ca_Kabuli_denovo             | 1676628                        | (C/G)       |
| 17789       | CakSNP17789    | <i>Kabuli</i>    | Ca_Kabuli_denovo             | 1676641                        | (T/A)       |
| 17790       | CakSNP17790    | <i>Kabuli</i>    | Ca_Kabuli_denovo             | 1676642                        | (T/G)       |
| 17791       | CakSNP17791    | <i>Kabuli</i>    | Ca_Kabuli_denovo             | 1676643                        | (T/G)       |
| 17792       | CakSNP17792    | <i>Kabuli</i>    | Ca_Kabuli_denovo             | 1676647                        | (A/G)       |
| 17793       | CakSNP17793    | <i>Kabuli</i>    | Ca_Kabuli_denovo             | 1676665                        | (T/G)       |
| 17794       | CakSNP17794    | <i>Kabuli</i>    | Ca_Kabuli_denovo             | 1676692                        | (T/G)       |
| 17795       | CakSNP17795    | <i>Kabuli</i>    | Ca_Kabuli_denovo             | 1679945                        | (C/T)       |
| 17796       | CakSNP17796    | <i>Kabuli</i>    | Ca_Kabuli_denovo             | 1684919                        | (A/T)       |
| 17797       | CakSNP17797    | <i>Kabuli</i>    | Ca_Kabuli_denovo             | 1684920                        | (G/T)       |
| 17798       | CakSNP17798    | <i>Kabuli</i>    | Ca_Kabuli_denovo             | 1684923                        | (T/G)       |
| 17799       | CakSNP17799    | <i>Kabuli</i>    | Ca_Kabuli_denovo             | 1685743                        | (A/C)       |
| 17800       | CakSNP17800    | <i>Kabuli</i>    | Ca_Kabuli_denovo             | 1685744                        | (C/T)       |
| 17801       | CakSNP17801    | <i>Kabuli</i>    | Ca_Kabuli_denovo             | 1685745                        | (T/C)       |
| 17802       | CakSNP17802    | <i>Kabuli</i>    | Ca_Kabuli_denovo             | 1687665                        | (A/G)       |
| 17803       | CakSNP17803    | <i>Kabuli</i>    | Ca_Kabuli_denovo             | 1687667                        | (A/G)       |
| 17804       | CakSNP17804    | <i>Kabuli</i>    | Ca_Kabuli_denovo             | 1687669                        | (A/T)       |
| 17805       | CakSNP17805    | <i>Kabuli</i>    | Ca_Kabuli_denovo             | 1688595                        | (A/T)       |
| 17806       | CakSNP17806    | <i>Kabuli</i>    | Ca_Kabuli_denovo             | 1688596                        | (T/C)       |
| 17807       | CakSNP17807    | <i>Kabuli</i>    | Ca_Kabuli_denovo             | 1688598                        | (C/A)       |
| 17808       | CakSNP17808    | <i>Kabuli</i>    | Ca_Kabuli_denovo             | 1688599                        | (A/T)       |
| 17809       | CakSNP17809    | <i>Kabuli</i>    | Ca_Kabuli_denovo             | 1688600                        | (C/A)       |
| 17810       | CakSNP17810    | <i>Kabuli</i>    | Ca_Kabuli_denovo             | 1690593                        | (G/A)       |
| 17811       | CakSNP17811    | <i>Kabuli</i>    | Ca_Kabuli_denovo             | 1690595                        | (T/G)       |
| 17812       | CakSNP17812    | <i>Kabuli</i>    | Ca_Kabuli_denovo             | 1690605                        | (T/A)       |
| 17813       | CakSNP17813    | <i>Kabuli</i>    | Ca_Kabuli_denovo             | 1696698                        | (T/G)       |
| 17814       | CakSNP17814    | <i>Kabuli</i>    | Ca_Kabuli_denovo             | 1696705                        | (C/G)       |
| 17815       | CakSNP17815    | <i>Kabuli</i>    | Ca_Kabuli_denovo             | 1698932                        | (G/C)       |
| 17816       | CakSNP17816    | <i>Kabuli</i>    | Ca_Kabuli_denovo             | 1698934                        | (A/G)       |
| 17817       | CakSNP17817    | <i>Kabuli</i>    | Ca_Kabuli_denovo             | 1698960                        | (A/G)       |
| 17818       | CakSNP17818    | <i>Kabuli</i>    | Ca_Kabuli_denovo             | 1699496                        | (C/G)       |
| 17819       | CakSNP17819    | <i>Kabuli</i>    | Ca_Kabuli_denovo             | 1699498                        | (C/G)       |
| 17820       | CakSNP17820    | <i>Kabuli</i>    | Ca_Kabuli_denovo             | 1699521                        | (T/G)       |
| 17821       | CakSNP17821    | <i>Kabuli</i>    | Ca_Kabuli_denovo             | 1699556                        | (G/T)       |

| <b>S.N.</b> | <b>SNP IDs</b> | <b>Cultivars</b> | <b>Chromosomes/scaffolds</b> | <b>Physical positions (bp)</b> | <b>SNPs</b> |
|-------------|----------------|------------------|------------------------------|--------------------------------|-------------|
| 17822       | CakSNP17822    | <i>Kabuli</i>    | Ca_Kabuli_denovo             | 1699569                        | (A/T)       |
| 17823       | CakSNP17823    | <i>Kabuli</i>    | Ca_Kabuli_denovo             | 1707083                        | (C/A)       |
| 17824       | CakSNP17824    | <i>Kabuli</i>    | Ca_Kabuli_denovo             | 1707085                        | (C/G)       |
| 17825       | CakSNP17825    | <i>Kabuli</i>    | Ca_Kabuli_denovo             | 1707086                        | (A/T)       |
| 17826       | CakSNP17826    | <i>Kabuli</i>    | Ca_Kabuli_denovo             | 1707560                        | (C/A)       |
| 17827       | CakSNP17827    | <i>Kabuli</i>    | Ca_Kabuli_denovo             | 1707561                        | (A/G)       |
| 17828       | CakSNP17828    | <i>Kabuli</i>    | Ca_Kabuli_denovo             | 1707563                        | (A/G)       |
| 17829       | CakSNP17829    | <i>Kabuli</i>    | Ca_Kabuli_denovo             | 1707565                        | (T/A)       |
| 17830       | CakSNP17830    | <i>Kabuli</i>    | Ca_Kabuli_denovo             | 1732322                        | (A/G)       |
| 17831       | CakSNP17831    | <i>Kabuli</i>    | Ca_Kabuli_denovo             | 1732338                        | (C/T)       |
| 17832       | CakSNP17832    | <i>Kabuli</i>    | Ca_Kabuli_denovo             | 1734760                        | (G/C)       |
| 17833       | CakSNP17833    | <i>Kabuli</i>    | Ca_Kabuli_denovo             | 1735490                        | (C/G)       |
| 17834       | CakSNP17834    | <i>Kabuli</i>    | Ca_Kabuli_denovo             | 1735502                        | (C/T)       |
| 17835       | CakSNP17835    | <i>Kabuli</i>    | Ca_Kabuli_denovo             | 1735523                        | (T/C)       |
| 17836       | CakSNP17836    | <i>Kabuli</i>    | Ca_Kabuli_denovo             | 1735891                        | (T/G)       |
| 17837       | CakSNP17837    | <i>Kabuli</i>    | Ca_Kabuli_denovo             | 1735929                        | (T/A)       |
| 17838       | CakSNP17838    | <i>Kabuli</i>    | Ca_Kabuli_denovo             | 1735956                        | (G/C)       |
| 17839       | CakSNP17839    | <i>Kabuli</i>    | Ca_Kabuli_denovo             | 1735988                        | (A/G)       |
| 17840       | CakSNP17840    | <i>Kabuli</i>    | Ca_Kabuli_denovo             | 1737810                        | (A/G)       |
| 17841       | CakSNP17841    | <i>Kabuli</i>    | Ca_Kabuli_denovo             | 1737898                        | (T/G)       |
| 17842       | CakSNP17842    | <i>Kabuli</i>    | Ca_Kabuli_denovo             | 1737939                        | (G/A)       |
| 17843       | CakSNP17843    | <i>Kabuli</i>    | Ca_Kabuli_denovo             | 1737964                        | (C/A)       |
| 17844       | CakSNP17844    | <i>Kabuli</i>    | Ca_Kabuli_denovo             | 1739167                        | (G/C)       |
| 17845       | CakSNP17845    | <i>Kabuli</i>    | Ca_Kabuli_denovo             | 1739168                        | (A/C)       |
| 17846       | CakSNP17846    | <i>Kabuli</i>    | Ca_Kabuli_denovo             | 1739955                        | (G/A)       |
| 17847       | CakSNP17847    | <i>Kabuli</i>    | Ca_Kabuli_denovo             | 1740013                        | (T/G)       |
| 17848       | CakSNP17848    | <i>Kabuli</i>    | Ca_Kabuli_denovo             | 1741581                        | (G/A)       |
| 17849       | CakSNP17849    | <i>Kabuli</i>    | Ca_Kabuli_denovo             | 1745745                        | (C/T)       |
| 17850       | CakSNP17850    | <i>Kabuli</i>    | Ca_Kabuli_denovo             | 1745967                        | (G/T)       |
| 17851       | CakSNP17851    | <i>Kabuli</i>    | Ca_Kabuli_denovo             | 1773627                        | (C/T)       |
| 17852       | CakSNP17852    | <i>Kabuli</i>    | Ca_Kabuli_denovo             | 1773675                        | (T/G)       |
| 17853       | CakSNP17853    | <i>Kabuli</i>    | Ca_Kabuli_denovo             | 1778702                        | (T/A)       |
| 17854       | CakSNP17854    | <i>Kabuli</i>    | Ca_Kabuli_denovo             | 1778708                        | (G/A)       |
| 17855       | CakSNP17855    | <i>Kabuli</i>    | Ca_Kabuli_denovo             | 1782502                        | (C/T)       |
| 17856       | CakSNP17856    | <i>Kabuli</i>    | Ca_Kabuli_denovo             | 1782521                        | (T/C)       |
| 17857       | CakSNP17857    | <i>Kabuli</i>    | Ca_Kabuli_denovo             | 1785710                        | (T/C)       |
| 17858       | CakSNP17858    | <i>Kabuli</i>    | Ca_Kabuli_denovo             | 1799281                        | (G/T)       |
| 17859       | CakSNP17859    | <i>Kabuli</i>    | Ca_Kabuli_denovo             | 1835504                        | (G/A)       |



| <b>S.N.</b> | <b>SNP IDs</b> | <b>Cultivars</b> | <b>Chromosomes/scaffolds</b> | <b>Physical positions (bp)</b> | <b>SNPs</b> |
|-------------|----------------|------------------|------------------------------|--------------------------------|-------------|
| 17860       | CakSNP17860    | <i>Kabuli</i>    | Ca_Kabuli_denovo             | 1848623                        | (T/C)       |
| 17861       | CakSNP17861    | <i>Kabuli</i>    | Ca_Kabuli_denovo             | 1865044                        | (C/G)       |
| 17862       | CakSNP17862    | <i>Kabuli</i>    | Ca_Kabuli_denovo             | 1865051                        | (T/C)       |
| 17863       | CakSNP17863    | <i>Kabuli</i>    | Ca_Kabuli_denovo             | 1877655                        | (A/C)       |
| 17864       | CakSNP17864    | <i>Kabuli</i>    | Ca_Kabuli_denovo             | 1885551                        | (C/T)       |
| 17865       | CakSNP17865    | <i>Kabuli</i>    | Ca_Kabuli_denovo             | 1885575                        | (G/A)       |
| 17866       | CakSNP17866    | <i>Kabuli</i>    | Ca_Kabuli_denovo             | 1892464                        | (C/T)       |
| 17867       | CakSNP17867    | <i>Kabuli</i>    | Ca_Kabuli_denovo             | 1892470                        | (A/T)       |
| 17868       | CakSNP17868    | <i>Kabuli</i>    | Ca_Kabuli_denovo             | 1898838                        | (A/G)       |
| 17869       | CakSNP17869    | <i>Kabuli</i>    | Ca_Kabuli_denovo             | 1898842                        | (G/A)       |
| 17870       | CakSNP17870    | <i>Kabuli</i>    | Ca_Kabuli_denovo             | 1907169                        | (C/T)       |
| 17871       | CakSNP17871    | <i>Kabuli</i>    | Ca_Kabuli_denovo             | 1954938                        | (C/T)       |
| 17872       | CakSNP17872    | <i>Kabuli</i>    | Ca_Kabuli_denovo             | 1973101                        | (A/C)       |
| 17873       | CakSNP17873    | <i>Kabuli</i>    | Ca_Kabuli_denovo             | 1981659                        | (C/G)       |
| 17874       | CakSNP17874    | <i>Kabuli</i>    | Ca_Kabuli_denovo             | 1981685                        | (C/T)       |
| 17875       | CakSNP17875    | <i>Kabuli</i>    | Ca_Kabuli_denovo             | 2017269                        | (C/T)       |
| 17876       | CakSNP17876    | <i>Kabuli</i>    | Ca_Kabuli_denovo             | 2017293                        | (G/A)       |
| 17877       | CakSNP17877    | <i>Kabuli</i>    | Ca_Kabuli_denovo             | 2082507                        | (C/T)       |
| 17878       | CakSNP17878    | <i>Kabuli</i>    | Ca_Kabuli_denovo             | 2082510                        | (T/C)       |
| 17879       | CakSNP17879    | <i>Kabuli</i>    | Ca_Kabuli_denovo             | 2083031                        | (G/C)       |
| 17880       | CakSNP17880    | <i>Kabuli</i>    | Ca_Kabuli_denovo             | 2083034                        | (G/A)       |
| 17881       | CakSNP17881    | <i>Kabuli</i>    | Ca_Kabuli_denovo             | 2083043                        | (T/G)       |
| 17882       | CakSNP17882    | <i>Kabuli</i>    | Ca_Kabuli_denovo             | 2086223                        | (A/C)       |
| 17883       | CakSNP17883    | <i>Kabuli</i>    | Ca_Kabuli_denovo             | 2089458                        | (A/G)       |
| 17884       | CakSNP17884    | <i>Kabuli</i>    | Ca_Kabuli_denovo             | 2089483                        | (G/C)       |
| 17885       | CakSNP17885    | <i>Kabuli</i>    | Ca_Kabuli_denovo             | 2103496                        | (C/G)       |
| 17886       | CakSNP17886    | <i>Kabuli</i>    | Ca_Kabuli_denovo             | 2117543                        | (A/G)       |
| 17887       | CakSNP17887    | <i>Kabuli</i>    | Ca_Kabuli_denovo             | 2179176                        | (A/C)       |
| 17888       | CakSNP17888    | <i>Kabuli</i>    | Ca_Kabuli_denovo             | 2196538                        | (T/A)       |
| 17889       | CakSNP17889    | <i>Kabuli</i>    | Ca_Kabuli_denovo             | 2196959                        | (G/A)       |
| 17890       | CakSNP17890    | <i>Kabuli</i>    | Ca_Kabuli_denovo             | 2196969                        | (G/A)       |
| 17891       | CakSNP17891    | <i>Kabuli</i>    | Ca_Kabuli_denovo             | 2204023                        | (C/T)       |
| 17892       | CakSNP17892    | <i>Kabuli</i>    | Ca_Kabuli_denovo             | 2212621                        | (C/T)       |
| 17893       | CakSNP17893    | <i>Kabuli</i>    | Ca_Kabuli_denovo             | 2212895                        | (C/T)       |
| 17894       | CakSNP17894    | <i>Kabuli</i>    | Ca_Kabuli_denovo             | 2238931                        | (C/T)       |
| 17895       | CakSNP17895    | <i>Kabuli</i>    | Ca_Kabuli_denovo             | 2238976                        | (C/T)       |
| 17896       | CakSNP17896    | <i>Kabuli</i>    | Ca_Kabuli_denovo             | 2272968                        | (G/A)       |
| 17897       | CakSNP17897    | <i>Kabuli</i>    | Ca_Kabuli_denovo             | 2289863                        | (C/A)       |

| <b>S.N.</b> | <b>SNP IDs</b> | <b>Cultivars</b> | <b>Chromosomes/scaffolds</b> | <b>Physical positions (bp)</b> | <b>SNPs</b> |
|-------------|----------------|------------------|------------------------------|--------------------------------|-------------|
| 17898       | CakSNP17898    | <i>Kabuli</i>    | Ca_Kabuli_denovo             | 2329264                        | (G/A)       |
| 17899       | CakSNP17899    | <i>Kabuli</i>    | Ca_Kabuli_denovo             | 2339668                        | (G/A)       |
| 17900       | CakSNP17900    | <i>Kabuli</i>    | Ca_Kabuli_denovo             | 2345594                        | (A/T)       |
| 17901       | CakSNP17901    | <i>Kabuli</i>    | Ca_Kabuli_denovo             | 2349919                        | (G/T)       |
| 17902       | CakSNP17902    | <i>Kabuli</i>    | Ca_Kabuli_denovo             | 2349923                        | (T/G)       |
| 17903       | CakSNP17903    | <i>Kabuli</i>    | Ca_Kabuli_denovo             | 2352980                        | (T/G)       |
| 17904       | CakSNP17904    | <i>Kabuli</i>    | Ca_Kabuli_denovo             | 2368635                        | (A/T)       |
| 17905       | CakSNP17905    | <i>Kabuli</i>    | Ca_Kabuli_denovo             | 2377565                        | (G/T)       |
| 17906       | CakSNP17906    | <i>Kabuli</i>    | Ca_Kabuli_denovo             | 2378145                        | (G/A)       |
| 17907       | CakSNP17907    | <i>Kabuli</i>    | Ca_Kabuli_denovo             | 2422055                        | (G/A)       |
| 17908       | CakSNP17908    | <i>Kabuli</i>    | Ca_Kabuli_denovo             | 2424690                        | (C/T)       |
| 17909       | CakSNP17909    | <i>Kabuli</i>    | Ca_Kabuli_denovo             | 2436733                        | (T/G)       |
| 17910       | CakSNP17910    | <i>Kabuli</i>    | Ca_Kabuli_denovo             | 2442765                        | (G/C)       |
| 17911       | CakSNP17911    | <i>Kabuli</i>    | Ca_Kabuli_denovo             | 2472151                        | (C/G)       |
| 17912       | CakSNP17912    | <i>Kabuli</i>    | Ca_Kabuli_denovo             | 2472157                        | (T/C)       |
| 17913       | CakSNP17913    | <i>Kabuli</i>    | Ca_Kabuli_denovo             | 2472160                        | (A/C)       |
| 17914       | CakSNP17914    | <i>Kabuli</i>    | Ca_Kabuli_denovo             | 2481362                        | (C/G)       |
| 17915       | CakSNP17915    | <i>Kabuli</i>    | Ca_Kabuli_denovo             | 2481371                        | (G/C)       |
| 17916       | CakSNP17916    | <i>Kabuli</i>    | Ca_Kabuli_denovo             | 2484130                        | (G/C)       |
| 17917       | CakSNP17917    | <i>Kabuli</i>    | Ca_Kabuli_denovo             | 2493981                        | (A/C)       |
| 17918       | CakSNP17918    | <i>Kabuli</i>    | Ca_Kabuli_denovo             | 2521639                        | (T/C)       |
| 17919       | CakSNP17919    | <i>Kabuli</i>    | Ca_Kabuli_denovo             | 2532212                        | (C/T)       |
| 17920       | CakSNP17920    | <i>Kabuli</i>    | Ca_Kabuli_denovo             | 2534679                        | (T/C)       |
| 17921       | CakSNP17921    | <i>Kabuli</i>    | Ca_Kabuli_denovo             | 2543790                        | (C/G)       |
| 17922       | CakSNP17922    | <i>Kabuli</i>    | Ca_Kabuli_denovo             | 2543805                        | (G/A)       |
| 17923       | CakSNP17923    | <i>Kabuli</i>    | Ca_Kabuli_denovo             | 2557532                        | (T/G)       |
| 17924       | CakSNP17924    | <i>Kabuli</i>    | Ca_Kabuli_denovo             | 2566186                        | (C/T)       |
| 17925       | CakSNP17925    | <i>Kabuli</i>    | Ca_Kabuli_denovo             | 2586184                        | (T/C)       |
| 17926       | CakSNP17926    | <i>Kabuli</i>    | Ca_Kabuli_denovo             | 2596306                        | (G/A)       |
| 17927       | CakSNP17927    | <i>Kabuli</i>    | Ca_Kabuli_denovo             | 2599278                        | (C/T)       |
| 17928       | CakSNP17928    | <i>Kabuli</i>    | Ca_Kabuli_denovo             | 2599284                        | (T/C)       |
| 17929       | CakSNP17929    | <i>Kabuli</i>    | Ca_Kabuli_denovo             | 2810251                        | (C/G)       |
| 17930       | CakSNP17930    | <i>Kabuli</i>    | Ca_Kabuli_denovo             | 2822788                        | (C/T)       |
| 17931       | CakSNP17931    | <i>Kabuli</i>    | Ca_Kabuli_denovo             | 2822794                        | (G/A)       |
| 17932       | CakSNP17932    | <i>Kabuli</i>    | Ca_Kabuli_denovo             | 2841190                        | (C/G)       |
| 17933       | CakSNP17933    | <i>Kabuli</i>    | Ca_Kabuli_denovo             | 2899276                        | (A/G)       |
| 17934       | CakSNP17934    | <i>Kabuli</i>    | Ca_Kabuli_denovo             | 2905320                        | (A/C)       |
| 17935       | CakSNP17935    | <i>Kabuli</i>    | Ca_Kabuli_denovo             | 2920107                        | (A/C)       |

| <b>S.N.</b> | <b>SNP IDs</b> | <b>Cultivars</b> | <b>Chromosomes/scaffolds</b> | <b>Physical positions (bp)</b> | <b>SNPs</b> |
|-------------|----------------|------------------|------------------------------|--------------------------------|-------------|
| 17936       | CakSNP17936    | <i>Kabuli</i>    | Ca_Kabuli_denovo             | 2943170                        | (A/C)       |
| 17937       | CakSNP17937    | <i>Kabuli</i>    | Ca_Kabuli_denovo             | 2950044                        | (T/C)       |
| 17938       | CakSNP17938    | <i>Kabuli</i>    | Ca_Kabuli_denovo             | 2967013                        | (A/G)       |
| 17939       | CakSNP17939    | <i>Kabuli</i>    | Ca_Kabuli_denovo             | 2986733                        | (G/C)       |
| 17940       | CakSNP17940    | <i>Kabuli</i>    | Ca_Kabuli_denovo             | 2988473                        | (G/A)       |
| 17941       | CakSNP17941    | <i>Kabuli</i>    | Ca_Kabuli_denovo             | 3002912                        | (G/C)       |
| 17942       | CakSNP17942    | <i>Kabuli</i>    | Ca_Kabuli_denovo             | 3004600                        | (C/G)       |
| 17943       | CakSNP17943    | <i>Kabuli</i>    | Ca_Kabuli_denovo             | 3028757                        | (A/G)       |
| 17944       | CakSNP17944    | <i>Kabuli</i>    | Ca_Kabuli_denovo             | 3058052                        | (G/A)       |
| 17945       | CakSNP17945    | <i>Kabuli</i>    | Ca_Kabuli_denovo             | 3067960                        | (A/G)       |
| 17946       | CakSNP17946    | <i>Kabuli</i>    | Ca_Kabuli_denovo             | 3075746                        | (C/G)       |
| 17947       | CakSNP17947    | <i>Kabuli</i>    | Ca_Kabuli_denovo             | 3075749                        | (A/G)       |
| 17948       | CakSNP17948    | <i>Kabuli</i>    | Ca_Kabuli_denovo             | 3082312                        | (T/A)       |
| 17949       | CakSNP17949    | <i>Kabuli</i>    | Ca_Kabuli_denovo             | 3102755                        | (C/T)       |
| 17950       | CakSNP17950    | <i>Kabuli</i>    | Ca_Kabuli_denovo             | 3112730                        | (C/T)       |
| 17951       | CakSNP17951    | <i>Kabuli</i>    | Ca_Kabuli_denovo             | 3119860                        | (G/A)       |
| 17952       | CakSNP17952    | <i>Kabuli</i>    | Ca_Kabuli_denovo             | 3119864                        | (A/G)       |
| 17953       | CakSNP17953    | <i>Kabuli</i>    | Ca_Kabuli_denovo             | 3122405                        | (A/G)       |
| 17954       | CakSNP17954    | <i>Kabuli</i>    | Ca_Kabuli_denovo             | 3158126                        | (G/T)       |
| 17955       | CakSNP17955    | <i>Kabuli</i>    | Ca_Kabuli_denovo             | 3158176                        | (G/A)       |
| 17956       | CakSNP17956    | <i>Kabuli</i>    | Ca_Kabuli_denovo             | 3195629                        | (G/A)       |
| 17957       | CakSNP17957    | <i>Kabuli</i>    | Ca_Kabuli_denovo             | 3234354                        | (G/A)       |
| 17958       | CakSNP17958    | <i>Kabuli</i>    | Ca_Kabuli_denovo             | 3236873                        | (A/G)       |
| 17959       | CakSNP17959    | <i>Kabuli</i>    | Ca_Kabuli_denovo             | 3236875                        | (T/C)       |
| 17960       | CakSNP17960    | <i>Kabuli</i>    | Ca_Kabuli_denovo             | 3236878                        | (T/G)       |
| 17961       | CakSNP17961    | <i>Kabuli</i>    | Ca_Kabuli_denovo             | 3303558                        | (A/C)       |
| 17962       | CakSNP17962    | <i>Kabuli</i>    | Ca_Kabuli_denovo             | 3303631                        | (G/C)       |
| 17963       | CakSNP17963    | <i>Kabuli</i>    | Ca_Kabuli_denovo             | 3315370                        | (A/G)       |
| 17964       | CakSNP17964    | <i>Kabuli</i>    | Ca_Kabuli_denovo             | 3315379                        | (A/G)       |
| 17965       | CakSNP17965    | <i>Kabuli</i>    | Ca_Kabuli_denovo             | 3366344                        | (C/T)       |
| 17966       | CakSNP17966    | <i>Kabuli</i>    | Ca_Kabuli_denovo             | 3366389                        | (G/T)       |
| 17967       | CakSNP17967    | <i>Kabuli</i>    | Ca_Kabuli_denovo             | 3376003                        | (A/G)       |
| 17968       | CakSNP17968    | <i>Kabuli</i>    | Ca_Kabuli_denovo             | 3376309                        | (T/C)       |
| 17969       | CakSNP17969    | <i>Kabuli</i>    | Ca_Kabuli_denovo             | 3381616                        | (T/C)       |
| 17970       | CakSNP17970    | <i>Kabuli</i>    | Ca_Kabuli_denovo             | 3383148                        | (T/C)       |
| 17971       | CakSNP17971    | <i>Kabuli</i>    | Ca_Kabuli_denovo             | 3397038                        | (T/C)       |
| 17972       | CakSNP17972    | <i>Kabuli</i>    | Ca_Kabuli_denovo             | 3401848                        | (A/C)       |
| 17973       | CakSNP17973    | <i>Kabuli</i>    | Ca_Kabuli_denovo             | 3419633                        | (C/G)       |

| <b>S.N.</b> | <b>SNP IDs</b> | <b>Cultivars</b> | <b>Chromosomes/scaffolds</b> | <b>Physical positions (bp)</b> | <b>SNPs</b> |
|-------------|----------------|------------------|------------------------------|--------------------------------|-------------|
| 17974       | CakSNP17974    | <i>Kabuli</i>    | Ca_Kabuli_denovo             | 3427074                        | (A/G)       |
| 17975       | CakSNP17975    | <i>Kabuli</i>    | Ca_Kabuli_denovo             | 3438889                        | (C/T)       |
| 17976       | CakSNP17976    | <i>Kabuli</i>    | Ca_Kabuli_denovo             | 3520157                        | (T/C)       |
| 17977       | CakSNP17977    | <i>Kabuli</i>    | Ca_Kabuli_denovo             | 3520187                        | (A/G)       |
| 17978       | CakSNP17978    | <i>Kabuli</i>    | Ca_Kabuli_denovo             | 3563125                        | (C/T)       |
| 17979       | CakSNP17979    | <i>Kabuli</i>    | Ca_Kabuli_denovo             | 3569168                        | (A/G)       |
| 17980       | CakSNP17980    | <i>Kabuli</i>    | Ca_Kabuli_denovo             | 3569183                        | (A/G)       |
| 17981       | CakSNP17981    | <i>Kabuli</i>    | Ca_Kabuli_denovo             | 3593979                        | (G/T)       |
| 17982       | CakSNP17982    | <i>Kabuli</i>    | Ca_Kabuli_denovo             | 3608269                        | (C/T)       |
| 17983       | CakSNP17983    | <i>Kabuli</i>    | Ca_Kabuli_denovo             | 3608277                        | (G/T)       |
| 17984       | CakSNP17984    | <i>Kabuli</i>    | Ca_Kabuli_denovo             | 3619659                        | (C/T)       |
| 17985       | CakSNP17985    | <i>Kabuli</i>    | Ca_Kabuli_denovo             | 3619740                        | (A/G)       |
| 17986       | CakSNP17986    | <i>Kabuli</i>    | Ca_Kabuli_denovo             | 3621163                        | (G/A)       |
| 17987       | CakSNP17987    | <i>Kabuli</i>    | Ca_Kabuli_denovo             | 3621166                        | (T/G)       |
| 17988       | CakSNP17988    | <i>Kabuli</i>    | Ca_Kabuli_denovo             | 3627246                        | (T/A)       |
| 17989       | CakSNP17989    | <i>Kabuli</i>    | Ca_Kabuli_denovo             | 3640534                        | (G/A)       |
| 17990       | CakSNP17990    | <i>Kabuli</i>    | Ca_Kabuli_denovo             | 3640537                        | (A/G)       |
| 17991       | CakSNP17991    | <i>Kabuli</i>    | Ca_Kabuli_denovo             | 3643962                        | (C/T)       |
| 17992       | CakSNP17992    | <i>Kabuli</i>    | Ca_Kabuli_denovo             | 3649832                        | (T/G)       |
| 17993       | CakSNP17993    | <i>Kabuli</i>    | Ca_Kabuli_denovo             | 3649844                        | (A/G)       |
| 17994       | CakSNP17994    | <i>Kabuli</i>    | Ca_Kabuli_denovo             | 3656017                        | (A/C)       |
| 17995       | CakSNP17995    | <i>Kabuli</i>    | Ca_Kabuli_denovo             | 3733774                        | (C/T)       |
| 17996       | CakSNP17996    | <i>Kabuli</i>    | Ca_Kabuli_denovo             | 3733795                        | (C/G)       |
| 17997       | CakSNP17997    | <i>Kabuli</i>    | Ca_Kabuli_denovo             | 3733959                        | (G/A)       |
| 17998       | CakSNP17998    | <i>Kabuli</i>    | Ca_Kabuli_denovo             | 3865215                        | (A/G)       |
| 17999       | CakSNP17999    | <i>Kabuli</i>    | Ca_Kabuli_denovo             | 3882576                        | (G/A)       |
| 18000       | CakSNP18000    | <i>Kabuli</i>    | Ca_Kabuli_denovo             | 3882602                        | (G/C)       |
| 18001       | CakSNP18001    | <i>Kabuli</i>    | Ca_Kabuli_denovo             | 3891592                        | (A/G)       |
| 18002       | CakSNP18002    | <i>Kabuli</i>    | Ca_Kabuli_denovo             | 3926567                        | (T/C)       |
| 18003       | CakSNP18003    | <i>Kabuli</i>    | Ca_Kabuli_denovo             | 3932481                        | (T/A)       |
| 18004       | CakSNP18004    | <i>Kabuli</i>    | Ca_Kabuli_denovo             | 3962628                        | (C/A)       |
| 18005       | CakSNP18005    | <i>Kabuli</i>    | Ca_Kabuli_denovo             | 3971486                        | (C/G)       |
| 18006       | CakSNP18006    | <i>Kabuli</i>    | Ca_Kabuli_denovo             | 3971511                        | (T/C)       |
| 18007       | CakSNP18007    | <i>Kabuli</i>    | Ca_Kabuli_denovo             | 3985191                        | (G/A)       |
| 18008       | CakSNP18008    | <i>Kabuli</i>    | Ca_Kabuli_denovo             | 3985194                        | (C/T)       |
| 18009       | CakSNP18009    | <i>Kabuli</i>    | Ca_Kabuli_denovo             | 3988996                        | (G/C)       |
| 18010       | CakSNP18010    | <i>Kabuli</i>    | Ca_Kabuli_denovo             | 3989017                        | (G/A)       |
| 18011       | CakSNP18011    | <i>Kabuli</i>    | Ca_Kabuli_denovo             | 4058620                        | (G/C)       |

| <b>S.N.</b> | <b>SNP IDs</b> | <b>Cultivars</b> | <b>Chromosomes/scaffolds</b> | <b>Physical positions (bp)</b> | <b>SNPs</b> |
|-------------|----------------|------------------|------------------------------|--------------------------------|-------------|
| 18012       | CakSNP18012    | <i>Kabuli</i>    | Ca_Kabuli_denovo             | 4058680                        | (A/C)       |
| 18013       | CakSNP18013    | <i>Kabuli</i>    | Ca_Kabuli_denovo             | 4069641                        | (G/C)       |
| 18014       | CakSNP18014    | <i>Kabuli</i>    | Ca_Kabuli_denovo             | 4069659                        | (C/T)       |
| 18015       | CakSNP18015    | <i>Kabuli</i>    | Ca_Kabuli_denovo             | 4074763                        | (A/G)       |
| 18016       | CakSNP18016    | <i>Kabuli</i>    | Ca_Kabuli_denovo             | 4074764                        | (C/G)       |
| 18017       | CakSNP18017    | <i>Kabuli</i>    | Ca_Kabuli_denovo             | 4102951                        | (A/G)       |
| 18018       | CakSNP18018    | <i>Kabuli</i>    | Ca_Kabuli_denovo             | 4131618                        | (A/C)       |
| 18019       | CakSNP18019    | <i>Kabuli</i>    | Ca_Kabuli_denovo             | 4327961                        | (T/C)       |
| 18020       | CakSNP18020    | <i>Kabuli</i>    | Ca_Kabuli_denovo             | 4354794                        | (C/T)       |
| 18021       | CakSNP18021    | <i>Kabuli</i>    | Ca_Kabuli_denovo             | 4354804                        | (C/T)       |
| 18022       | CakSNP18022    | <i>Kabuli</i>    | Ca_Kabuli_denovo             | 4384538                        | (T/C)       |
| 18023       | CakSNP18023    | <i>Kabuli</i>    | Ca_Kabuli_denovo             | 4423469                        | (A/G)       |
| 18024       | CakSNP18024    | <i>Kabuli</i>    | Ca_Kabuli_denovo             | 4423478                        | (C/G)       |
| 18025       | CakSNP18025    | <i>Kabuli</i>    | Ca_Kabuli_denovo             | 4462086                        | (C/A)       |
| 18026       | CakSNP18026    | <i>Kabuli</i>    | Ca_Kabuli_denovo             | 4531890                        | (A/C)       |
| 18027       | CakSNP18027    | <i>Kabuli</i>    | Ca_Kabuli_denovo             | 4533618                        | (T/C)       |
| 18028       | CakSNP18028    | <i>Kabuli</i>    | Ca_Kabuli_denovo             | 4565146                        | (G/A)       |
| 18029       | CakSNP18029    | <i>Kabuli</i>    | Ca_Kabuli_denovo             | 4575382                        | (C/T)       |
| 18030       | CakSNP18030    | <i>Kabuli</i>    | Ca_Kabuli_denovo             | 4581997                        | (C/G)       |
| 18031       | CakSNP18031    | <i>Kabuli</i>    | Ca_Kabuli_denovo             | 4581998                        | (C/A)       |
| 18032       | CakSNP18032    | <i>Kabuli</i>    | Ca_Kabuli_denovo             | 4633334                        | (G/A)       |
| 18033       | CakSNP18033    | <i>Kabuli</i>    | Ca_Kabuli_denovo             | 4634189                        | (A/C)       |
| 18034       | CakSNP18034    | <i>Kabuli</i>    | Ca_Kabuli_denovo             | 4645619                        | (G/A)       |
| 18035       | CakSNP18035    | <i>Kabuli</i>    | Ca_Kabuli_denovo             | 4659307                        | (G/C)       |
| 18036       | CakSNP18036    | <i>Kabuli</i>    | Ca_Kabuli_denovo             | 4659309                        | (C/A)       |
| 18037       | CakSNP18037    | <i>Kabuli</i>    | Ca_Kabuli_denovo             | 4659328                        | (G/A)       |
| 18038       | CakSNP18038    | <i>Kabuli</i>    | Ca_Kabuli_denovo             | 4704245                        | (G/A)       |
| 18039       | CakSNP18039    | <i>Kabuli</i>    | Ca_Kabuli_denovo             | 4704305                        | (C/T)       |
| 18040       | CakSNP18040    | <i>Kabuli</i>    | Ca_Kabuli_denovo             | 4738377                        | (T/A)       |
| 18041       | CakSNP18041    | <i>Kabuli</i>    | Ca_Kabuli_denovo             | 4738379                        | (G/T)       |
| 18042       | CakSNP18042    | <i>Kabuli</i>    | Ca_Kabuli_denovo             | 4738831                        | (G/A)       |
| 18043       | CakSNP18043    | <i>Kabuli</i>    | Ca_Kabuli_denovo             | 4756479                        | (G/A)       |
| 18044       | CakSNP18044    | <i>Kabuli</i>    | Ca_Kabuli_denovo             | 4763483                        | (C/A)       |
| 18045       | CakSNP18045    | <i>Kabuli</i>    | Ca_Kabuli_denovo             | 4769505                        | (C/A)       |
| 18046       | CakSNP18046    | <i>Kabuli</i>    | Ca_Kabuli_denovo             | 4769506                        | (A/G)       |
| 18047       | CakSNP18047    | <i>Kabuli</i>    | Ca_Kabuli_denovo             | 4779386                        | (G/T)       |
| 18048       | CakSNP18048    | <i>Kabuli</i>    | Ca_Kabuli_denovo             | 4779389                        | (G/A)       |
| 18049       | CakSNP18049    | <i>Kabuli</i>    | Ca_Kabuli_denovo             | 4801328                        | (G/A)       |

| <b>S.N.</b> | <b>SNP IDs</b> | <b>Cultivars</b> | <b>Chromosomes/scaffolds</b> | <b>Physical positions (bp)</b> | <b>SNPs</b> |
|-------------|----------------|------------------|------------------------------|--------------------------------|-------------|
| 18050       | CakSNP18050    | <i>Kabuli</i>    | Ca_Kabuli_denovo             | 4801337                        | (G/A)       |
| 18051       | CakSNP18051    | <i>Kabuli</i>    | Ca_Kabuli_denovo             | 4801346                        | (C/T)       |
| 18052       | CakSNP18052    | <i>Kabuli</i>    | Ca_Kabuli_denovo             | 4804447                        | (A/G)       |
| 18053       | CakSNP18053    | <i>Kabuli</i>    | Ca_Kabuli_denovo             | 4829417                        | (G/C)       |
| 18054       | CakSNP18054    | <i>Kabuli</i>    | Ca_Kabuli_denovo             | 4829418                        | (T/C)       |
| 18055       | CakSNP18055    | <i>Kabuli</i>    | Ca_Kabuli_denovo             | 4837576                        | (C/T)       |
| 18056       | CakSNP18056    | <i>Kabuli</i>    | Ca_Kabuli_denovo             | 4848221                        | (C/T)       |
| 18057       | CakSNP18057    | <i>Kabuli</i>    | Ca_Kabuli_denovo             | 4848227                        | (G/A)       |
| 18058       | CakSNP18058    | <i>Kabuli</i>    | Ca_Kabuli_denovo             | 4849347                        | (C/G)       |
| 18059       | CakSNP18059    | <i>Kabuli</i>    | Ca_Kabuli_denovo             | 4870801                        | (G/A)       |
| 18060       | CakSNP18060    | <i>Kabuli</i>    | Ca_Kabuli_denovo             | 4910257                        | (G/A)       |
| 18061       | CakSNP18061    | <i>Kabuli</i>    | Ca_Kabuli_denovo             | 4931630                        | (C/T)       |
| 18062       | CakSNP18062    | <i>Kabuli</i>    | Ca_Kabuli_denovo             | 4956229                        | (A/G)       |
| 18063       | CakSNP18063    | <i>Kabuli</i>    | Ca_Kabuli_denovo             | 4970754                        | (A/C)       |
| 18064       | CakSNP18064    | <i>Kabuli</i>    | Ca_Kabuli_denovo             | 4984720                        | (G/A)       |
| 18065       | CakSNP18065    | <i>Kabuli</i>    | Ca_Kabuli_denovo             | 4984729                        | (C/T)       |
| 18066       | CakSNP18066    | <i>Kabuli</i>    | Ca_Kabuli_denovo             | 4986581                        | (T/C)       |
| 18067       | CakSNP18067    | <i>Kabuli</i>    | Ca_Kabuli_denovo             | 4997664                        | (G/A)       |
| 18068       | CakSNP18068    | <i>Kabuli</i>    | Ca_Kabuli_denovo             | 4999327                        | (A/G)       |
| 18069       | CakSNP18069    | <i>Kabuli</i>    | Ca_Kabuli_denovo             | 4999329                        | (G/A)       |
| 18070       | CakSNP18070    | <i>Kabuli</i>    | Ca_Kabuli_denovo             | 4999334                        | (G/C)       |
| 18071       | CakSNP18071    | <i>Kabuli</i>    | Ca_Kabuli_denovo             | 4999336                        | (C/G)       |
| 18072       | CakSNP18072    | <i>Kabuli</i>    | Ca_Kabuli_denovo             | 4999337                        | (A/C)       |
| 18073       | CakSNP18073    | <i>Kabuli</i>    | Ca_Kabuli_denovo             | 4999367                        | (T/G)       |
| 18074       | CakSNP18074    | <i>Kabuli</i>    | Ca_Kabuli_denovo             | 5021916                        | (A/T)       |
| 18075       | CakSNP18075    | <i>Kabuli</i>    | Ca_Kabuli_denovo             | 5021954                        | (C/T)       |
| 18076       | CakSNP18076    | <i>Kabuli</i>    | Ca_Kabuli_denovo             | 5036439                        | (C/A)       |
| 18077       | CakSNP18077    | <i>Kabuli</i>    | Ca_Kabuli_denovo             | 5085488                        | (C/T)       |
| 18078       | CakSNP18078    | <i>Kabuli</i>    | Ca_Kabuli_denovo             | 5104591                        | (A/G)       |
| 18079       | CakSNP18079    | <i>Kabuli</i>    | Ca_Kabuli_denovo             | 5109203                        | (T/C)       |
| 18080       | CakSNP18080    | <i>Kabuli</i>    | Ca_Kabuli_denovo             | 5128398                        | (C/G)       |
| 18081       | CakSNP18081    | <i>Kabuli</i>    | Ca_Kabuli_denovo             | 5128413                        | (A/G)       |
| 18082       | CakSNP18082    | <i>Kabuli</i>    | Ca_Kabuli_denovo             | 5154944                        | (C/G)       |
| 18083       | CakSNP18083    | <i>Kabuli</i>    | Ca_Kabuli_denovo             | 5155600                        | (C/G)       |
| 18084       | CakSNP18084    | <i>Kabuli</i>    | Ca_Kabuli_denovo             | 5191898                        | (C/T)       |
| 18085       | CakSNP18085    | <i>Kabuli</i>    | Ca_Kabuli_denovo             | 5196708                        | (T/A)       |
| 18086       | CakSNP18086    | <i>Kabuli</i>    | Ca_Kabuli_denovo             | 5229436                        | (G/C)       |
| 18087       | CakSNP18087    | <i>Kabuli</i>    | Ca_Kabuli_denovo             | 5230153                        | (C/G)       |

| <b>S.N.</b> | <b>SNP IDs</b> | <b>Cultivars</b> | <b>Chromosomes/scaffolds</b> | <b>Physical positions (bp)</b> | <b>SNPs</b> |
|-------------|----------------|------------------|------------------------------|--------------------------------|-------------|
| 18088       | CakSNP18088    | <i>Kabuli</i>    | Ca_Kabuli_denovo             | 5230160                        | (T/C)       |
| 18089       | CakSNP18089    | <i>Kabuli</i>    | Ca_Kabuli_denovo             | 5236751                        | (G/A)       |
| 18090       | CakSNP18090    | <i>Kabuli</i>    | Ca_Kabuli_denovo             | 5236789                        | (T/A)       |
| 18091       | CakSNP18091    | <i>Kabuli</i>    | Ca_Kabuli_denovo             | 5238535                        | (T/A)       |
| 18092       | CakSNP18092    | <i>Kabuli</i>    | Ca_Kabuli_denovo             | 5238598                        | (A/G)       |
| 18093       | CakSNP18093    | <i>Kabuli</i>    | Ca_Kabuli_denovo             | 5263444                        | (C/T)       |
| 18094       | CakSNP18094    | <i>Kabuli</i>    | Ca_Kabuli_denovo             | 5273594                        | (G/A)       |
| 18095       | CakSNP18095    | <i>Kabuli</i>    | Ca_Kabuli_denovo             | 5273656                        | (C/G)       |
| 18096       | CakSNP18096    | <i>Kabuli</i>    | Ca_Kabuli_denovo             | 5275340                        | (G/A)       |
| 18097       | CakSNP18097    | <i>Kabuli</i>    | Ca_Kabuli_denovo             | 5280137                        | (G/A)       |
| 18098       | CakSNP18098    | <i>Kabuli</i>    | Ca_Kabuli_denovo             | 5305760                        | (G/C)       |
| 18099       | CakSNP18099    | <i>Kabuli</i>    | Ca_Kabuli_denovo             | 5329084                        | (G/C)       |
| 18100       | CakSNP18100    | <i>Kabuli</i>    | Ca_Kabuli_denovo             | 5329559                        | (T/C)       |
| 18101       | CakSNP18101    | <i>Kabuli</i>    | Ca_Kabuli_denovo             | 5329562                        | (C/G)       |
| 18102       | CakSNP18102    | <i>Kabuli</i>    | Ca_Kabuli_denovo             | 5332558                        | (C/T)       |
| 18103       | CakSNP18103    | <i>Kabuli</i>    | Ca_Kabuli_denovo             | 5332561                        | (C/A)       |
| 18104       | CakSNP18104    | <i>Kabuli</i>    | Ca_Kabuli_denovo             | 5337094                        | (G/C)       |
| 18105       | CakSNP18105    | <i>Kabuli</i>    | Ca_Kabuli_denovo             | 5357564                        | (C/T)       |
| 18106       | CakSNP18106    | <i>Kabuli</i>    | Ca_Kabuli_denovo             | 5358806                        | (A/G)       |
| 18107       | CakSNP18107    | <i>Kabuli</i>    | Ca_Kabuli_denovo             | 5388664                        | (A/T)       |
| 18108       | CakSNP18108    | <i>Kabuli</i>    | Ca_Kabuli_denovo             | 5402790                        | (G/A)       |
| 18109       | CakSNP18109    | <i>Kabuli</i>    | Ca_Kabuli_denovo             | 5402793                        | (C/T)       |
| 18110       | CakSNP18110    | <i>Kabuli</i>    | Ca_Kabuli_denovo             | 5470445                        | (A/C)       |
| 18111       | CakSNP18111    | <i>Kabuli</i>    | Ca_Kabuli_denovo             | 5470446                        | (G/C)       |
| 18112       | CakSNP18112    | <i>Kabuli</i>    | Ca_Kabuli_denovo             | 5470447                        | (A/G)       |
| 18113       | CakSNP18113    | <i>Kabuli</i>    | Ca_Kabuli_denovo             | 5471395                        | (C/T)       |
| 18114       | CakSNP18114    | <i>Kabuli</i>    | Ca_Kabuli_denovo             | 5477856                        | (C/A)       |
| 18115       | CakSNP18115    | <i>Kabuli</i>    | Ca_Kabuli_denovo             | 5529333                        | (C/G)       |
| 18116       | CakSNP18116    | <i>Kabuli</i>    | Ca_Kabuli_denovo             | 5529359                        | (C/T)       |
| 18117       | CakSNP18117    | <i>Kabuli</i>    | Ca_Kabuli_denovo             | 5558990                        | (C/T)       |
| 18118       | CakSNP18118    | <i>Kabuli</i>    | Ca_Kabuli_denovo             | 5559026                        | (C/A)       |
| 18119       | CakSNP18119    | <i>Kabuli</i>    | Ca_Kabuli_denovo             | 5568535                        | (C/G)       |
| 18120       | CakSNP18120    | <i>Kabuli</i>    | Ca_Kabuli_denovo             | 5582991                        | (A/T)       |
| 18121       | CakSNP18121    | <i>Kabuli</i>    | Ca_Kabuli_denovo             | 5592088                        | (C/T)       |
| 18122       | CakSNP18122    | <i>Kabuli</i>    | Ca_Kabuli_denovo             | 5592090                        | (G/T)       |
| 18123       | CakSNP18123    | <i>Kabuli</i>    | Ca_Kabuli_denovo             | 5596926                        | (A/C)       |
| 18124       | CakSNP18124    | <i>Kabuli</i>    | Ca_Kabuli_denovo             | 5681190                        | (A/T)       |
| 18125       | CakSNP18125    | <i>Kabuli</i>    | Ca_Kabuli_denovo             | 5681191                        | (C/T)       |

| <b>S.N.</b> | <b>SNP IDs</b> | <b>Cultivars</b> | <b>Chromosomes/scaffolds</b> | <b>Physical positions (bp)</b> | <b>SNPs</b> |
|-------------|----------------|------------------|------------------------------|--------------------------------|-------------|
| 18126       | CakSNP18126    | <i>Kabuli</i>    | Ca_Kabuli_denovo             | 5725564                        | (C/T)       |
| 18127       | CakSNP18127    | <i>Kabuli</i>    | Ca_Kabuli_denovo             | 5725609                        | (G/A)       |
| 18128       | CakSNP18128    | <i>Kabuli</i>    | Ca_Kabuli_denovo             | 5766882                        | (T/G)       |
| 18129       | CakSNP18129    | <i>Kabuli</i>    | Ca_Kabuli_denovo             | 5766883                        | (T/A)       |
| 18130       | CakSNP18130    | <i>Kabuli</i>    | Ca_Kabuli_denovo             | 5773213                        | (C/T)       |
| 18131       | CakSNP18131    | <i>Kabuli</i>    | Ca_Kabuli_denovo             | 5781658                        | (C/G)       |
| 18132       | CakSNP18132    | <i>Kabuli</i>    | Ca_Kabuli_denovo             | 5806886                        | (T/C)       |
| 18133       | CakSNP18133    | <i>Kabuli</i>    | Ca_Kabuli_denovo             | 5816220                        | (A/C)       |
| 18134       | CakSNP18134    | <i>Kabuli</i>    | Ca_Kabuli_denovo             | 5819283                        | (G/C)       |
| 18135       | CakSNP18135    | <i>Kabuli</i>    | Ca_Kabuli_denovo             | 5848818                        | (T/A)       |
| 18136       | CakSNP18136    | <i>Kabuli</i>    | Ca_Kabuli_denovo             | 5856817                        | (G/A)       |
| 18137       | CakSNP18137    | <i>Kabuli</i>    | Ca_Kabuli_denovo             | 5863013                        | (C/A)       |
| 18138       | CakSNP18138    | <i>Kabuli</i>    | Ca_Kabuli_denovo             | 5863024                        | (G/A)       |
| 18139       | CakSNP18139    | <i>Kabuli</i>    | Ca_Kabuli_denovo             | 5864127                        | (G/A)       |
| 18140       | CakSNP18140    | <i>Kabuli</i>    | Ca_Kabuli_denovo             | 5864153                        | (G/C)       |
| 18141       | CakSNP18141    | <i>Kabuli</i>    | Ca_Kabuli_denovo             | 5873238                        | (C/A)       |
| 18142       | CakSNP18142    | <i>Kabuli</i>    | Ca_Kabuli_denovo             | 5873308                        | (A/G)       |
| 18143       | CakSNP18143    | <i>Kabuli</i>    | Ca_Kabuli_denovo             | 5879375                        | (G/T)       |
| 18144       | CakSNP18144    | <i>Kabuli</i>    | Ca_Kabuli_denovo             | 5879387                        | (C/G)       |
| 18145       | CakSNP18145    | <i>Kabuli</i>    | Ca_Kabuli_denovo             | 5879389                        | (C/A)       |
| 18146       | CakSNP18146    | <i>Kabuli</i>    | Ca_Kabuli_denovo             | 5879418                        | (T/G)       |
| 18147       | CakSNP18147    | <i>Kabuli</i>    | Ca_Kabuli_denovo             | 5879435                        | (C/A)       |
| 18148       | CakSNP18148    | <i>Kabuli</i>    | Ca_Kabuli_denovo             | 5879445                        | (G/T)       |
| 18149       | CakSNP18149    | <i>Kabuli</i>    | Ca_Kabuli_denovo             | 5879451                        | (C/A)       |
| 18150       | CakSNP18150    | <i>Kabuli</i>    | Ca_Kabuli_denovo             | 5890893                        | (T/A)       |
| 18151       | CakSNP18151    | <i>Kabuli</i>    | Ca_Kabuli_denovo             | 5890894                        | (G/A)       |
| 18152       | CakSNP18152    | <i>Kabuli</i>    | Ca_Kabuli_denovo             | 5890895                        | (G/T)       |
| 18153       | CakSNP18153    | <i>Kabuli</i>    | Ca_Kabuli_denovo             | 5890898                        | (C/T)       |
| 18154       | CakSNP18154    | <i>Kabuli</i>    | Ca_Kabuli_denovo             | 5890899                        | (A/T)       |
| 18155       | CakSNP18155    | <i>Kabuli</i>    | Ca_Kabuli_denovo             | 5919819                        | (C/G)       |
| 18156       | CakSNP18156    | <i>Kabuli</i>    | Ca_Kabuli_denovo             | 5952126                        | (A/G)       |
| 18157       | CakSNP18157    | <i>Kabuli</i>    | Ca_Kabuli_denovo             | 5952154                        | (A/C)       |
| 18158       | CakSNP18158    | <i>Kabuli</i>    | Ca_Kabuli_denovo             | 5952171                        | (A/G)       |
| 18159       | CakSNP18159    | <i>Kabuli</i>    | Ca_Kabuli_denovo             | 5963529                        | (G/A)       |
| 18160       | CakSNP18160    | <i>Kabuli</i>    | Ca_Kabuli_denovo             | 5963530                        | (T/A)       |
| 18161       | CakSNP18161    | <i>Kabuli</i>    | Ca_Kabuli_denovo             | 5963531                        | (T/C)       |
| 18162       | CakSNP18162    | <i>Kabuli</i>    | Ca_Kabuli_denovo             | 5963533                        | (G/A)       |
| 18163       | CakSNP18163    | <i>Kabuli</i>    | Ca_Kabuli_denovo             | 5971199                        | (T/G)       |



| <b>S.N.</b> | <b>SNP IDs</b> | <b>Cultivars</b> | <b>Chromosomes/scaffolds</b> | <b>Physical positions (bp)</b> | <b>SNPs</b> |
|-------------|----------------|------------------|------------------------------|--------------------------------|-------------|
| 18164       | CakSNP18164    | <i>Kabuli</i>    | Ca_Kabuli_denovo             | 6010227                        | (T/A)       |
| 18165       | CakSNP18165    | <i>Kabuli</i>    | Ca_Kabuli_denovo             | 6010251                        | (T/G)       |
| 18166       | CakSNP18166    | <i>Kabuli</i>    | Ca_Kabuli_denovo             | 6010287                        | (G/T)       |
| 18167       | CakSNP18167    | <i>Kabuli</i>    | Ca_Kabuli_denovo             | 6010311                        | (A/G)       |
| 18168       | CakSNP18168    | <i>Kabuli</i>    | Ca_Kabuli_denovo             | 6010573                        | (G/A)       |
| 18169       | CakSNP18169    | <i>Kabuli</i>    | Ca_Kabuli_denovo             | 6012251                        | (A/C)       |
| 18170       | CakSNP18170    | <i>Kabuli</i>    | Ca_Kabuli_denovo             | 6014521                        | (C/T)       |
| 18171       | CakSNP18171    | <i>Kabuli</i>    | Ca_Kabuli_denovo             | 6014733                        | (T/G)       |
| 18172       | CakSNP18172    | <i>Kabuli</i>    | Ca_Kabuli_denovo             | 6014753                        | (T/G)       |
| 18173       | CakSNP18173    | <i>Kabuli</i>    | Ca_Kabuli_denovo             | 6014754                        | (T/A)       |
| 18174       | CakSNP18174    | <i>Kabuli</i>    | Ca_Kabuli_denovo             | 6014921                        | (A/C)       |
| 18175       | CakSNP18175    | <i>Kabuli</i>    | Ca_Kabuli_denovo             | 6017294                        | (G/T)       |
| 18176       | CakSNP18176    | <i>Kabuli</i>    | Ca_Kabuli_denovo             | 6017306                        | (T/G)       |
| 18177       | CakSNP18177    | <i>Kabuli</i>    | Ca_Kabuli_denovo             | 6017326                        | (C/G)       |
| 18178       | CakSNP18178    | <i>Kabuli</i>    | Ca_Kabuli_denovo             | 6017328                        | (T/G)       |
| 18179       | CakSNP18179    | <i>Kabuli</i>    | Ca_Kabuli_denovo             | 6017335                        | (A/G)       |
| 18180       | CakSNP18180    | <i>Kabuli</i>    | Ca_Kabuli_denovo             | 6017341                        | (A/G)       |
| 18181       | CakSNP18181    | <i>Kabuli</i>    | Ca_Kabuli_denovo             | 6017344                        | (C/A)       |
| 18182       | CakSNP18182    | <i>Kabuli</i>    | Ca_Kabuli_denovo             | 6017345                        | (C/G)       |
| 18183       | CakSNP18183    | <i>Kabuli</i>    | Ca_Kabuli_denovo             | 6017348                        | (T/G)       |
| 18184       | CakSNP18184    | <i>Kabuli</i>    | Ca_Kabuli_denovo             | 6034062                        | (T/C)       |
| 18185       | CakSNP18185    | <i>Kabuli</i>    | Ca_Kabuli_denovo             | 6034071                        | (A/G)       |
| 18186       | CakSNP18186    | <i>Kabuli</i>    | Ca_Kabuli_denovo             | 6043616                        | (A/G)       |
| 18187       | CakSNP18187    | <i>Kabuli</i>    | Ca_Kabuli_denovo             | 6043627                        | (G/T)       |
| 18188       | CakSNP18188    | <i>Kabuli</i>    | Ca_Kabuli_denovo             | 6047989                        | (T/G)       |
| 18189       | CakSNP18189    | <i>Kabuli</i>    | Ca_Kabuli_denovo             | 6051272                        | (T/C)       |
| 18190       | CakSNP18190    | <i>Kabuli</i>    | Ca_Kabuli_denovo             | 6057777                        | (G/A)       |
| 18191       | CakSNP18191    | <i>Kabuli</i>    | Ca_Kabuli_denovo             | 6059536                        | (A/G)       |
| 18192       | CakSNP18192    | <i>Kabuli</i>    | Ca_Kabuli_denovo             | 6059551                        | (A/G)       |
| 18193       | CakSNP18193    | <i>Kabuli</i>    | Ca_Kabuli_denovo             | 6059588                        | (A/C)       |
| 18194       | CakSNP18194    | <i>Kabuli</i>    | Ca_Kabuli_denovo             | 6098413                        | (G/A)       |
| 18195       | CakSNP18195    | <i>Kabuli</i>    | Ca_Kabuli_denovo             | 6103875                        | (G/A)       |
| 18196       | CakSNP18196    | <i>Kabuli</i>    | Ca_Kabuli_denovo             | 6117175                        | (C/A)       |
| 18197       | CakSNP18197    | <i>Kabuli</i>    | Ca_Kabuli_denovo             | 6117188                        | (C/A)       |
| 18198       | CakSNP18198    | <i>Kabuli</i>    | Ca_Kabuli_denovo             | 6117213                        | (C/G)       |
| 18199       | CakSNP18199    | <i>Kabuli</i>    | Ca_Kabuli_denovo             | 6117215                        | (A/G)       |
| 18200       | CakSNP18200    | <i>Kabuli</i>    | Ca_Kabuli_denovo             | 6165667                        | (T/C)       |
| 18201       | CakSNP18201    | <i>Kabuli</i>    | Ca_Kabuli_denovo             | 6182275                        | (T/G)       |

| <b>S.N.</b> | <b>SNP IDs</b> | <b>Cultivars</b> | <b>Chromosomes/scaffolds</b> | <b>Physical positions (bp)</b> | <b>SNPs</b> |
|-------------|----------------|------------------|------------------------------|--------------------------------|-------------|
| 18202       | CakSNP18202    | <i>Kabuli</i>    | Ca_Kabuli_denovo             | 6182281                        | (G/C)       |
| 18203       | CakSNP18203    | <i>Kabuli</i>    | Ca_Kabuli_denovo             | 6190775                        | (T/C)       |
| 18204       | CakSNP18204    | <i>Kabuli</i>    | Ca_Kabuli_denovo             | 6191143                        | (G/C)       |
| 18205       | CakSNP18205    | <i>Kabuli</i>    | Ca_Kabuli_denovo             | 6191170                        | (G/A)       |
| 18206       | CakSNP18206    | <i>Kabuli</i>    | Ca_Kabuli_denovo             | 6237722                        | (G/A)       |
| 18207       | CakSNP18207    | <i>Kabuli</i>    | Ca_Kabuli_denovo             | 6258541                        | (C/G)       |
| 18208       | CakSNP18208    | <i>Kabuli</i>    | Ca_Kabuli_denovo             | 6264608                        | (C/T)       |
| 18209       | CakSNP18209    | <i>Kabuli</i>    | Ca_Kabuli_denovo             | 6300610                        | (A/G)       |
| 18210       | CakSNP18210    | <i>Kabuli</i>    | Ca_Kabuli_denovo             | 6300657                        | (T/C)       |
| 18211       | CakSNP18211    | <i>Kabuli</i>    | Ca_Kabuli_denovo             | 6310736                        | (G/C)       |
| 18212       | CakSNP18212    | <i>Kabuli</i>    | Ca_Kabuli_denovo             | 6310744                        | (T/C)       |
| 18213       | CakSNP18213    | <i>Kabuli</i>    | Ca_Kabuli_denovo             | 6321154                        | (G/A)       |
| 18214       | CakSNP18214    | <i>Kabuli</i>    | Ca_Kabuli_denovo             | 6355193                        | (T/G)       |
| 18215       | CakSNP18215    | <i>Kabuli</i>    | Ca_Kabuli_denovo             | 6368181                        | (G/A)       |
| 18216       | CakSNP18216    | <i>Kabuli</i>    | Ca_Kabuli_denovo             | 6377203                        | (C/G)       |
| 18217       | CakSNP18217    | <i>Kabuli</i>    | Ca_Kabuli_denovo             | 6399060                        | (G/A)       |
| 18218       | CakSNP18218    | <i>Kabuli</i>    | Ca_Kabuli_denovo             | 6402317                        | (G/C)       |
| 18219       | CakSNP18219    | <i>Kabuli</i>    | Ca_Kabuli_denovo             | 6402384                        | (C/T)       |
| 18220       | CakSNP18220    | <i>Kabuli</i>    | Ca_Kabuli_denovo             | 6402397                        | (A/C)       |
| 18221       | CakSNP18221    | <i>Kabuli</i>    | Ca_Kabuli_denovo             | 6409872                        | (T/A)       |
| 18222       | CakSNP18222    | <i>Kabuli</i>    | Ca_Kabuli_denovo             | 6411767                        | (C/G)       |
| 18223       | CakSNP18223    | <i>Kabuli</i>    | Ca_Kabuli_denovo             | 6411770                        | (C/T)       |
| 18224       | CakSNP18224    | <i>Kabuli</i>    | Ca_Kabuli_denovo             | 6419754                        | (G/A)       |
| 18225       | CakSNP18225    | <i>Kabuli</i>    | Ca_Kabuli_denovo             | 6427894                        | (T/C)       |
| 18226       | CakSNP18226    | <i>Kabuli</i>    | Ca_Kabuli_denovo             | 6462028                        | (C/T)       |
| 18227       | CakSNP18227    | <i>Kabuli</i>    | Ca_Kabuli_denovo             | 6475346                        | (G/A)       |
| 18228       | CakSNP18228    | <i>Kabuli</i>    | Ca_Kabuli_denovo             | 6475348                        | (T/C)       |
| 18229       | CakSNP18229    | <i>Kabuli</i>    | Ca_Kabuli_denovo             | 6480559                        | (A/G)       |
| 18230       | CakSNP18230    | <i>Kabuli</i>    | Ca_Kabuli_denovo             | 6480580                        | (C/G)       |
| 18231       | CakSNP18231    | <i>Kabuli</i>    | Ca_Kabuli_denovo             | 6486758                        | (G/A)       |
| 18232       | CakSNP18232    | <i>Kabuli</i>    | Ca_Kabuli_denovo             | 6486782                        | (C/T)       |
| 18233       | CakSNP18233    | <i>Kabuli</i>    | Ca_Kabuli_denovo             | 6526925                        | (A/C)       |
| 18234       | CakSNP18234    | <i>Kabuli</i>    | Ca_Kabuli_denovo             | 6531409                        | (T/C)       |
| 18235       | CakSNP18235    | <i>Kabuli</i>    | Ca_Kabuli_denovo             | 6545167                        | (G/C)       |
| 18236       | CakSNP18236    | <i>Kabuli</i>    | Ca_Kabuli_denovo             | 6545175                        | (A/G)       |
| 18237       | CakSNP18237    | <i>Kabuli</i>    | Ca_Kabuli_denovo             | 6552139                        | (C/T)       |
| 18238       | CakSNP18238    | <i>Kabuli</i>    | Ca_Kabuli_denovo             | 6552142                        | (G/T)       |
| 18239       | CakSNP18239    | <i>Kabuli</i>    | Ca_Kabuli_denovo             | 6552157                        | (G/T)       |

| <b>S.N.</b> | <b>SNP IDs</b> | <b>Cultivars</b> | <b>Chromosomes/scaffolds</b> | <b>Physical positions (bp)</b> | <b>SNPs</b> |
|-------------|----------------|------------------|------------------------------|--------------------------------|-------------|
| 18240       | CakSNP18240    | <i>Kabuli</i>    | Ca_Kabuli_denovo             | 6552161                        | (T/A)       |
| 18241       | CakSNP18241    | <i>Kabuli</i>    | Ca_Kabuli_denovo             | 6559984                        | (C/T)       |
| 18242       | CakSNP18242    | <i>Kabuli</i>    | Ca_Kabuli_denovo             | 6559996                        | (G/A)       |
| 18243       | CakSNP18243    | <i>Kabuli</i>    | Ca_Kabuli_denovo             | 6560006                        | (A/G)       |
| 18244       | CakSNP18244    | <i>Kabuli</i>    | Ca_Kabuli_denovo             | 6565348                        | (T/C)       |
| 18245       | CakSNP18245    | <i>Kabuli</i>    | Ca_Kabuli_denovo             | 6581608                        | (A/C)       |
| 18246       | CakSNP18246    | <i>Kabuli</i>    | Ca_Kabuli_denovo             | 6583973                        | (T/G)       |
| 18247       | CakSNP18247    | <i>Kabuli</i>    | Ca_Kabuli_denovo             | 6590097                        | (C/T)       |
| 18248       | CakSNP18248    | <i>Kabuli</i>    | Ca_Kabuli_denovo             | 6590129                        | (G/A)       |
| 18249       | CakSNP18249    | <i>Kabuli</i>    | Ca_Kabuli_denovo             | 6590156                        | (T/G)       |
| 18250       | CakSNP18250    | <i>Kabuli</i>    | Ca_Kabuli_denovo             | 6599573                        | (A/G)       |
| 18251       | CakSNP18251    | <i>Kabuli</i>    | Ca_Kabuli_denovo             | 6612721                        | (A/G)       |
| 18252       | CakSNP18252    | <i>Kabuli</i>    | Ca_Kabuli_denovo             | 6663521                        | (C/G)       |
| 18253       | CakSNP18253    | <i>Kabuli</i>    | Ca_Kabuli_denovo             | 6663527                        | (G/A)       |
| 18254       | CakSNP18254    | <i>Kabuli</i>    | Ca_Kabuli_denovo             | 6688010                        | (C/G)       |
| 18255       | CakSNP18255    | <i>Kabuli</i>    | Ca_Kabuli_denovo             | 6706345                        | (A/G)       |
| 18256       | CakSNP18256    | <i>Kabuli</i>    | Ca_Kabuli_denovo             | 6707272                        | (T/C)       |
| 18257       | CakSNP18257    | <i>Kabuli</i>    | Ca_Kabuli_denovo             | 6711061                        | (A/G)       |
| 18258       | CakSNP18258    | <i>Kabuli</i>    | Ca_Kabuli_denovo             | 6712133                        | (C/G)       |
| 18259       | CakSNP18259    | <i>Kabuli</i>    | Ca_Kabuli_denovo             | 6712135                        | (G/C)       |
| 18260       | CakSNP18260    | <i>Kabuli</i>    | Ca_Kabuli_denovo             | 6712138                        | (C/A)       |
| 18261       | CakSNP18261    | <i>Kabuli</i>    | Ca_Kabuli_denovo             | 6712141                        | (A/T)       |
| 18262       | CakSNP18262    | <i>Kabuli</i>    | Ca_Kabuli_denovo             | 6712146                        | (G/T)       |
| 18263       | CakSNP18263    | <i>Kabuli</i>    | Ca_Kabuli_denovo             | 6712147                        | (T/G)       |
| 18264       | CakSNP18264    | <i>Kabuli</i>    | Ca_Kabuli_denovo             | 6720667                        | (A/G)       |
| 18265       | CakSNP18265    | <i>Kabuli</i>    | Ca_Kabuli_denovo             | 6785596                        | (T/A)       |
| 18266       | CakSNP18266    | <i>Kabuli</i>    | Ca_Kabuli_denovo             | 6791052                        | (C/A)       |
| 18267       | CakSNP18267    | <i>Kabuli</i>    | Ca_Kabuli_denovo             | 6791071                        | (A/C)       |
| 18268       | CakSNP18268    | <i>Kabuli</i>    | Ca_Kabuli_denovo             | 6800910                        | (A/T)       |
| 18269       | CakSNP18269    | <i>Kabuli</i>    | Ca_Kabuli_denovo             | 6800913                        | (A/G)       |
| 18270       | CakSNP18270    | <i>Kabuli</i>    | Ca_Kabuli_denovo             | 6800915                        | (G/A)       |
| 18271       | CakSNP18271    | <i>Kabuli</i>    | Ca_Kabuli_denovo             | 6800927                        | (G/C)       |
| 18272       | CakSNP18272    | <i>Kabuli</i>    | Ca_Kabuli_denovo             | 6800944                        | (G/C)       |
| 18273       | CakSNP18273    | <i>Kabuli</i>    | Ca_Kabuli_denovo             | 6800949                        | (T/C)       |
| 18274       | CakSNP18274    | <i>Kabuli</i>    | Ca_Kabuli_denovo             | 6811156                        | (G/T)       |
| 18275       | CakSNP18275    | <i>Kabuli</i>    | Ca_Kabuli_denovo             | 6811456                        | (A/T)       |
| 18276       | CakSNP18276    | <i>Kabuli</i>    | Ca_Kabuli_denovo             | 6811472                        | (A/T)       |
| 18277       | CakSNP18277    | <i>Kabuli</i>    | Ca_Kabuli_denovo             | 6813703                        | (A/G)       |

| <b>S.N.</b> | <b>SNP IDs</b> | <b>Cultivars</b> | <b>Chromosomes/scaffolds</b> | <b>Physical positions (bp)</b> | <b>SNPs</b> |
|-------------|----------------|------------------|------------------------------|--------------------------------|-------------|
| 18278       | CakSNP18278    | <i>Kabuli</i>    | Ca_Kabuli_denovo             | 6861843                        | (T/C)       |
| 18279       | CakSNP18279    | <i>Kabuli</i>    | Ca_Kabuli_denovo             | 6861855                        | (G/A)       |
| 18280       | CakSNP18280    | <i>Kabuli</i>    | Ca_Kabuli_denovo             | 6869394                        | (T/C)       |
| 18281       | CakSNP18281    | <i>Kabuli</i>    | Ca_Kabuli_denovo             | 6870117                        | (C/T)       |
| 18282       | CakSNP18282    | <i>Kabuli</i>    | Ca_Kabuli_denovo             | 6870139                        | (G/A)       |
| 18283       | CakSNP18283    | <i>Kabuli</i>    | Ca_Kabuli_denovo             | 6873819                        | (A/T)       |
| 18284       | CakSNP18284    | <i>Kabuli</i>    | Ca_Kabuli_denovo             | 6873823                        | (T/G)       |
| 18285       | CakSNP18285    | <i>Kabuli</i>    | Ca_Kabuli_denovo             | 6873825                        | (T/C)       |
| 18286       | CakSNP18286    | <i>Kabuli</i>    | Ca_Kabuli_denovo             | 6873826                        | (C/T)       |
| 18287       | CakSNP18287    | <i>Kabuli</i>    | Ca_Kabuli_denovo             | 6874179                        | (C/A)       |
| 18288       | CakSNP18288    | <i>Kabuli</i>    | Ca_Kabuli_denovo             | 6874189                        | (G/T)       |
| 18289       | CakSNP18289    | <i>Kabuli</i>    | Ca_Kabuli_denovo             | 6877071                        | (G/A)       |
| 18290       | CakSNP18290    | <i>Kabuli</i>    | Ca_Kabuli_denovo             | 6882102                        | (C/G)       |
| 18291       | CakSNP18291    | <i>Kabuli</i>    | Ca_Kabuli_denovo             | 6882109                        | (T/C)       |
| 18292       | CakSNP18292    | <i>Kabuli</i>    | Ca_Kabuli_denovo             | 6882113                        | (T/A)       |
| 18293       | CakSNP18293    | <i>Kabuli</i>    | Ca_Kabuli_denovo             | 6882804                        | (T/A)       |
| 18294       | CakSNP18294    | <i>Kabuli</i>    | Ca_Kabuli_denovo             | 6894538                        | (C/G)       |
| 18295       | CakSNP18295    | <i>Kabuli</i>    | Ca_Kabuli_denovo             | 6894541                        | (A/G)       |
| 18296       | CakSNP18296    | <i>Kabuli</i>    | Ca_Kabuli_denovo             | 6894542                        | (C/A)       |
| 18297       | CakSNP18297    | <i>Kabuli</i>    | Ca_Kabuli_denovo             | 6898197                        | (A/G)       |
| 18298       | CakSNP18298    | <i>Kabuli</i>    | Ca_Kabuli_denovo             | 6907485                        | (T/A)       |
| 18299       | CakSNP18299    | <i>Kabuli</i>    | Ca_Kabuli_denovo             | 6907494                        | (A/G)       |
| 18300       | CakSNP18300    | <i>Kabuli</i>    | Ca_Kabuli_denovo             | 6916345                        | (C/G)       |
| 18301       | CakSNP18301    | <i>Kabuli</i>    | Ca_Kabuli_denovo             | 6916346                        | (T/A)       |
| 18302       | CakSNP18302    | <i>Kabuli</i>    | Ca_Kabuli_denovo             | 6916357                        | (C/T)       |
| 18303       | CakSNP18303    | <i>Kabuli</i>    | Ca_Kabuli_denovo             | 6916359                        | (T/C)       |
| 18304       | CakSNP18304    | <i>Kabuli</i>    | Ca_Kabuli_denovo             | 6918579                        | (A/G)       |
| 18305       | CakSNP18305    | <i>Kabuli</i>    | Ca_Kabuli_denovo             | 6918593                        | (C/G)       |
| 18306       | CakSNP18306    | <i>Kabuli</i>    | Ca_Kabuli_denovo             | 6923821                        | (A/T)       |
| 18307       | CakSNP18307    | <i>Kabuli</i>    | Ca_Kabuli_denovo             | 6929548                        | (A/T)       |
| 18308       | CakSNP18308    | <i>Kabuli</i>    | Ca_Kabuli_denovo             | 6939673                        | (G/A)       |
| 18309       | CakSNP18309    | <i>Kabuli</i>    | Ca_Kabuli_denovo             | 6939691                        | (A/T)       |
| 18310       | CakSNP18310    | <i>Kabuli</i>    | Ca_Kabuli_denovo             | 6944977                        | (A/C)       |
| 18311       | CakSNP18311    | <i>Kabuli</i>    | Ca_Kabuli_denovo             | 6945035                        | (C/G)       |
| 18312       | CakSNP18312    | <i>Kabuli</i>    | Ca_Kabuli_denovo             | 6945036                        | (A/G)       |
| 18313       | CakSNP18313    | <i>Kabuli</i>    | Ca_Kabuli_denovo             | 6956695                        | (C/T)       |
| 18314       | CakSNP18314    | <i>Kabuli</i>    | Ca_Kabuli_denovo             | 6956707                        | (A/G)       |
| 18315       | CakSNP18315    | <i>Kabuli</i>    | Ca_Kabuli_denovo             | 6959682                        | (C/G)       |

| <b>S.N.</b> | <b>SNP IDs</b> | <b>Cultivars</b> | <b>Chromosomes/scaffolds</b> | <b>Physical positions (bp)</b> | <b>SNPs</b> |
|-------------|----------------|------------------|------------------------------|--------------------------------|-------------|
| 18316       | CakSNP18316    | <i>Kabuli</i>    | Ca_Kabuli_denovo             | 6959727                        | (T/C)       |
| 18317       | CakSNP18317    | <i>Kabuli</i>    | Ca_Kabuli_denovo             | 6960786                        | (G/A)       |
| 18318       | CakSNP18318    | <i>Kabuli</i>    | Ca_Kabuli_denovo             | 6960796                        | (C/A)       |
| 18319       | CakSNP18319    | <i>Kabuli</i>    | Ca_Kabuli_denovo             | 6960820                        | (C/G)       |
| 18320       | CakSNP18320    | <i>Kabuli</i>    | Ca_Kabuli_denovo             | 6975387                        | (A/G)       |
| 18321       | CakSNP18321    | <i>Kabuli</i>    | Ca_Kabuli_denovo             | 6975388                        | (T/A)       |
| 18322       | CakSNP18322    | <i>Kabuli</i>    | Ca_Kabuli_denovo             | 6975430                        | (T/C)       |
| 18323       | CakSNP18323    | <i>Kabuli</i>    | Ca_Kabuli_denovo             | 6975851                        | (T/C)       |
| 18324       | CakSNP18324    | <i>Kabuli</i>    | Ca_Kabuli_denovo             | 6975869                        | (C/G)       |
| 18325       | CakSNP18325    | <i>Kabuli</i>    | Ca_Kabuli_denovo             | 6976418                        | (C/G)       |
| 18326       | CakSNP18326    | <i>Kabuli</i>    | Ca_Kabuli_denovo             | 6976441                        | (T/C)       |
| 18327       | CakSNP18327    | <i>Kabuli</i>    | Ca_Kabuli_denovo             | 6985651                        | (T/C)       |
| 18328       | CakSNP18328    | <i>Kabuli</i>    | Ca_Kabuli_denovo             | 6998248                        | (A/G)       |
| 18329       | CakSNP18329    | <i>Kabuli</i>    | Ca_Kabuli_denovo             | 6998250                        | (C/A)       |
| 18330       | CakSNP18330    | <i>Kabuli</i>    | Ca_Kabuli_denovo             | 7000764                        | (A/T)       |
| 18331       | CakSNP18331    | <i>Kabuli</i>    | Ca_Kabuli_denovo             | 7012691                        | (A/G)       |
| 18332       | CakSNP18332    | <i>Kabuli</i>    | Ca_Kabuli_denovo             | 7017046                        | (T/C)       |
| 18333       | CakSNP18333    | <i>Kabuli</i>    | Ca_Kabuli_denovo             | 7017051                        | (A/G)       |
| 18334       | CakSNP18334    | <i>Kabuli</i>    | Ca_Kabuli_denovo             | 7017052                        | (T/C)       |
| 18335       | CakSNP18335    | <i>Kabuli</i>    | Ca_Kabuli_denovo             | 7017053                        | (A/C)       |
| 18336       | CakSNP18336    | <i>Kabuli</i>    | Ca_Kabuli_denovo             | 7017058                        | (G/C)       |
| 18337       | CakSNP18337    | <i>Kabuli</i>    | Ca_Kabuli_denovo             | 7017061                        | (A/T)       |
| 18338       | CakSNP18338    | <i>Kabuli</i>    | Ca_Kabuli_denovo             | 7017065                        | (T/C)       |
| 18339       | CakSNP18339    | <i>Kabuli</i>    | Ca_Kabuli_denovo             | 7017071                        | (C/T)       |
| 18340       | CakSNP18340    | <i>Kabuli</i>    | Ca_Kabuli_denovo             | 7017079                        | (C/G)       |
| 18341       | CakSNP18341    | <i>Kabuli</i>    | Ca_Kabuli_denovo             | 7017080                        | (A/G)       |
| 18342       | CakSNP18342    | <i>Kabuli</i>    | Ca_Kabuli_denovo             | 7017081                        | (G/T)       |
| 18343       | CakSNP18343    | <i>Kabuli</i>    | Ca_Kabuli_denovo             | 7069247                        | (G/A)       |
| 18344       | CakSNP18344    | <i>Kabuli</i>    | Ca_Kabuli_denovo             | 7069273                        | (C/T)       |
| 18345       | CakSNP18345    | <i>Kabuli</i>    | Ca_Kabuli_denovo             | 7069930                        | (G/C)       |
| 18346       | CakSNP18346    | <i>Kabuli</i>    | Ca_Kabuli_denovo             | 7070108                        | (A/G)       |
| 18347       | CakSNP18347    | <i>Kabuli</i>    | Ca_Kabuli_denovo             | 7070110                        | (G/A)       |
| 18348       | CakSNP18348    | <i>Kabuli</i>    | Ca_Kabuli_denovo             | 7070111                        | (A/G)       |
| 18349       | CakSNP18349    | <i>Kabuli</i>    | Ca_Kabuli_denovo             | 7070113                        | (C/G)       |
| 18350       | CakSNP18350    | <i>Kabuli</i>    | Ca_Kabuli_denovo             | 7070115                        | (T/G)       |
| 18351       | CakSNP18351    | <i>Kabuli</i>    | Ca_Kabuli_denovo             | 7070117                        | (C/T)       |
| 18352       | CakSNP18352    | <i>Kabuli</i>    | Ca_Kabuli_denovo             | 7086244                        | (A/G)       |
| 18353       | CakSNP18353    | <i>Kabuli</i>    | Ca_Kabuli_denovo             | 7103380                        | (A/C)       |

| <b>S.N.</b> | <b>SNP IDs</b> | <b>Cultivars</b> | <b>Chromosomes/scaffolds</b> | <b>Physical positions (bp)</b> | <b>SNPs</b> |
|-------------|----------------|------------------|------------------------------|--------------------------------|-------------|
| 18354       | CakSNP18354    | <i>Kabuli</i>    | Ca_Kabuli_denovo             | 7127589                        | (G/A)       |
| 18355       | CakSNP18355    | <i>Kabuli</i>    | Ca_Kabuli_denovo             | 7131343                        | (G/A)       |
| 18356       | CakSNP18356    | <i>Kabuli</i>    | Ca_Kabuli_denovo             | 7141293                        | (A/G)       |
| 18357       | CakSNP18357    | <i>Kabuli</i>    | Ca_Kabuli_denovo             | 7141324                        | (A/G)       |
| 18358       | CakSNP18358    | <i>Kabuli</i>    | Ca_Kabuli_denovo             | 7143296                        | (G/A)       |
| 18359       | CakSNP18359    | <i>Kabuli</i>    | Ca_Kabuli_denovo             | 7143640                        | (G/A)       |
| 18360       | CakSNP18360    | <i>Kabuli</i>    | Ca_Kabuli_denovo             | 7143649                        | (G/A)       |
| 18361       | CakSNP18361    | <i>Kabuli</i>    | Ca_Kabuli_denovo             | 7143693                        | (T/C)       |
| 18362       | CakSNP18362    | <i>Kabuli</i>    | Ca_Kabuli_denovo             | 7146142                        | (C/T)       |
| 18363       | CakSNP18363    | <i>Kabuli</i>    | Ca_Kabuli_denovo             | 7146173                        | (C/T)       |
| 18364       | CakSNP18364    | <i>Kabuli</i>    | Ca_Kabuli_denovo             | 7149196                        | (C/T)       |
| 18365       | CakSNP18365    | <i>Kabuli</i>    | Ca_Kabuli_denovo             | 7152489                        | (C/T)       |
| 18366       | CakSNP18366    | <i>Kabuli</i>    | Ca_Kabuli_denovo             | 7183627                        | (A/G)       |
| 18367       | CakSNP18367    | <i>Kabuli</i>    | Ca_Kabuli_denovo             | 7191526                        | (C/T)       |
| 18368       | CakSNP18368    | <i>Kabuli</i>    | Ca_Kabuli_denovo             | 7246580                        | (C/T)       |
| 18369       | CakSNP18369    | <i>Kabuli</i>    | Ca_Kabuli_denovo             | 7254020                        | (C/G)       |
| 18370       | CakSNP18370    | <i>Kabuli</i>    | Ca_Kabuli_denovo             | 7254039                        | (T/C)       |
| 18371       | CakSNP18371    | <i>Kabuli</i>    | Ca_Kabuli_denovo             | 7257747                        | (G/C)       |
| 18372       | CakSNP18372    | <i>Kabuli</i>    | Ca_Kabuli_denovo             | 7267238                        | (C/T)       |
| 18373       | CakSNP18373    | <i>Kabuli</i>    | Ca_Kabuli_denovo             | 7267256                        | (C/A)       |
| 18374       | CakSNP18374    | <i>Kabuli</i>    | Ca_Kabuli_denovo             | 7267260                        | (A/T)       |
| 18375       | CakSNP18375    | <i>Kabuli</i>    | Ca_Kabuli_denovo             | 7311958                        | (G/A)       |
| 18376       | CakSNP18376    | <i>Kabuli</i>    | Ca_Kabuli_denovo             | 7328061                        | (A/G)       |
| 18377       | CakSNP18377    | <i>Kabuli</i>    | Ca_Kabuli_denovo             | 7344433                        | (T/A)       |
| 18378       | CakSNP18378    | <i>Kabuli</i>    | Ca_Kabuli_denovo             | 7369005                        | (G/A)       |
| 18379       | CakSNP18379    | <i>Kabuli</i>    | Ca_Kabuli_denovo             | 7375018                        | (T/C)       |
| 18380       | CakSNP18380    | <i>Kabuli</i>    | Ca_Kabuli_denovo             | 7382267                        | (T/C)       |
| 18381       | CakSNP18381    | <i>Kabuli</i>    | Ca_Kabuli_denovo             | 7382310                        | (G/T)       |
| 18382       | CakSNP18382    | <i>Kabuli</i>    | Ca_Kabuli_denovo             | 7391587                        | (C/G)       |
| 18383       | CakSNP18383    | <i>Kabuli</i>    | Ca_Kabuli_denovo             | 7391613                        | (T/G)       |
| 18384       | CakSNP18384    | <i>Kabuli</i>    | Ca_Kabuli_denovo             | 7391949                        | (C/T)       |
| 18385       | CakSNP18385    | <i>Kabuli</i>    | Ca_Kabuli_denovo             | 7401051                        | (C/G)       |
| 18386       | CakSNP18386    | <i>Kabuli</i>    | Ca_Kabuli_denovo             | 7401054                        | (G/T)       |
| 18387       | CakSNP18387    | <i>Kabuli</i>    | Ca_Kabuli_denovo             | 7401077                        | (A/G)       |
| 18388       | CakSNP18388    | <i>Kabuli</i>    | Ca_Kabuli_denovo             | 7401092                        | (G/A)       |
| 18389       | CakSNP18389    | <i>Kabuli</i>    | Ca_Kabuli_denovo             | 7401100                        | (A/G)       |
| 18390       | CakSNP18390    | <i>Kabuli</i>    | Ca_Kabuli_denovo             | 7401103                        | (C/T)       |
| 18391       | CakSNP18391    | <i>Kabuli</i>    | Ca_Kabuli_denovo             | 7401244                        | (T/A)       |

| <b>S.N.</b> | <b>SNP IDs</b> | <b>Cultivars</b> | <b>Chromosomes/scaffolds</b> | <b>Physical positions (bp)</b> | <b>SNPs</b> |
|-------------|----------------|------------------|------------------------------|--------------------------------|-------------|
| 18392       | CakSNP18392    | <i>Kabuli</i>    | Ca_Kabuli_denovo             | 7416312                        | (C/T)       |
| 18393       | CakSNP18393    | <i>Kabuli</i>    | Ca_Kabuli_denovo             | 7416345                        | (A/G)       |
| 18394       | CakSNP18394    | <i>Kabuli</i>    | Ca_Kabuli_denovo             | 7427788                        | (G/A)       |
| 18395       | CakSNP18395    | <i>Kabuli</i>    | Ca_Kabuli_denovo             | 7430435                        | (C/T)       |
| 18396       | CakSNP18396    | <i>Kabuli</i>    | Ca_Kabuli_denovo             | 7430455                        | (A/T)       |
| 18397       | CakSNP18397    | <i>Kabuli</i>    | Ca_Kabuli_denovo             | 7430464                        | (A/G)       |
| 18398       | CakSNP18398    | <i>Kabuli</i>    | Ca_Kabuli_denovo             | 7452895                        | (C/G)       |
| 18399       | CakSNP18399    | <i>Kabuli</i>    | Ca_Kabuli_denovo             | 7467529                        | (G/T)       |
| 18400       | CakSNP18400    | <i>Kabuli</i>    | Ca_Kabuli_denovo             | 7470943                        | (T/G)       |
| 18401       | CakSNP18401    | <i>Kabuli</i>    | Ca_Kabuli_denovo             | 7473234                        | (A/G)       |
| 18402       | CakSNP18402    | <i>Kabuli</i>    | Ca_Kabuli_denovo             | 7477213                        | (G/A)       |
| 18403       | CakSNP18403    | <i>Kabuli</i>    | Ca_Kabuli_denovo             | 7477273                        | (A/G)       |
| 18404       | CakSNP18404    | <i>Kabuli</i>    | Ca_Kabuli_denovo             | 7477350                        | (C/T)       |
| 18405       | CakSNP18405    | <i>Kabuli</i>    | Ca_Kabuli_denovo             | 7480213                        | (C/G)       |
| 18406       | CakSNP18406    | <i>Kabuli</i>    | Ca_Kabuli_denovo             | 7480219                        | (C/T)       |
| 18407       | CakSNP18407    | <i>Kabuli</i>    | Ca_Kabuli_denovo             | 7482161                        | (T/G)       |
| 18408       | CakSNP18408    | <i>Kabuli</i>    | Ca_Kabuli_denovo             | 7494282                        | (T/A)       |
| 18409       | CakSNP18409    | <i>Kabuli</i>    | Ca_Kabuli_denovo             | 7496672                        | (C/G)       |
| 18410       | CakSNP18410    | <i>Kabuli</i>    | Ca_Kabuli_denovo             | 7496846                        | (A/G)       |
| 18411       | CakSNP18411    | <i>Kabuli</i>    | Ca_Kabuli_denovo             | 7496849                        | (C/G)       |
| 18412       | CakSNP18412    | <i>Kabuli</i>    | Ca_Kabuli_denovo             | 7500180                        | (G/A)       |
| 18413       | CakSNP18413    | <i>Kabuli</i>    | Ca_Kabuli_denovo             | 7503626                        | (G/A)       |
| 18414       | CakSNP18414    | <i>Kabuli</i>    | Ca_Kabuli_denovo             | 7504369                        | (C/G)       |
| 18415       | CakSNP18415    | <i>Kabuli</i>    | Ca_Kabuli_denovo             | 7508116                        | (T/C)       |
| 18416       | CakSNP18416    | <i>Kabuli</i>    | Ca_Kabuli_denovo             | 7511720                        | (C/G)       |
| 18417       | CakSNP18417    | <i>Kabuli</i>    | Ca_Kabuli_denovo             | 7511741                        | (G/A)       |
| 18418       | CakSNP18418    | <i>Kabuli</i>    | Ca_Kabuli_denovo             | 7511744                        | (G/C)       |
| 18419       | CakSNP18419    | <i>Kabuli</i>    | Ca_Kabuli_denovo             | 7516002                        | (A/G)       |
| 18420       | CakSNP18420    | <i>Kabuli</i>    | Ca_Kabuli_denovo             | 7516053                        | (G/A)       |
| 18421       | CakSNP18421    | <i>Kabuli</i>    | Ca_Kabuli_denovo             | 7516067                        | (T/C)       |
| 18422       | CakSNP18422    | <i>Kabuli</i>    | Ca_Kabuli_denovo             | 7518038                        | (A/G)       |
| 18423       | CakSNP18423    | <i>Kabuli</i>    | Ca_Kabuli_denovo             | 7518231                        | (C/T)       |
| 18424       | CakSNP18424    | <i>Kabuli</i>    | Ca_Kabuli_denovo             | 7519248                        | (G/A)       |
| 18425       | CakSNP18425    | <i>Kabuli</i>    | Ca_Kabuli_denovo             | 7520456                        | (A/G)       |
| 18426       | CakSNP18426    | <i>Kabuli</i>    | Ca_Kabuli_denovo             | 7520467                        | (T/C)       |
| 18427       | CakSNP18427    | <i>Kabuli</i>    | Ca_Kabuli_denovo             | 7522835                        | (G/A)       |
| 18428       | CakSNP18428    | <i>Kabuli</i>    | Ca_Kabuli_denovo             | 7532746                        | (T/C)       |
| 18429       | CakSNP18429    | <i>Kabuli</i>    | Ca_Kabuli_denovo             | 7534604                        | (C/T)       |

| <b>S.N.</b> | <b>SNP IDs</b> | <b>Cultivars</b> | <b>Chromosomes/scaffolds</b> | <b>Physical positions (bp)</b> | <b>SNPs</b> |
|-------------|----------------|------------------|------------------------------|--------------------------------|-------------|
| 18430       | CakSNP18430    | <i>Kabuli</i>    | Ca_Kabuli_denovo             | 7537117                        | (G/A)       |
| 18431       | CakSNP18431    | <i>Kabuli</i>    | Ca_Kabuli_denovo             | 7537138                        | (C/T)       |
| 18432       | CakSNP18432    | <i>Kabuli</i>    | Ca_Kabuli_denovo             | 7539822                        | (C/T)       |
| 18433       | CakSNP18433    | <i>Kabuli</i>    | Ca_Kabuli_denovo             | 7539825                        | (C/G)       |
| 18434       | CakSNP18434    | <i>Kabuli</i>    | Ca_Kabuli_denovo             | 7546313                        | (A/G)       |
| 18435       | CakSNP18435    | <i>Kabuli</i>    | Ca_Kabuli_denovo             | 7548311                        | (A/G)       |
| 18436       | CakSNP18436    | <i>Kabuli</i>    | Ca_Kabuli_denovo             | 7549471                        | (T/C)       |
| 18437       | CakSNP18437    | <i>Kabuli</i>    | Ca_Kabuli_denovo             | 7549507                        | (T/G)       |
| 18438       | CakSNP18438    | <i>Kabuli</i>    | Ca_Kabuli_denovo             | 7553420                        | (A/G)       |
| 18439       | CakSNP18439    | <i>Kabuli</i>    | Ca_Kabuli_denovo             | 7557108                        | (C/G)       |
| 18440       | CakSNP18440    | <i>Kabuli</i>    | Ca_Kabuli_denovo             | 7557111                        | (G/C)       |
| 18441       | CakSNP18441    | <i>Kabuli</i>    | Ca_Kabuli_denovo             | 7563251                        | (A/G)       |
| 18442       | CakSNP18442    | <i>Kabuli</i>    | Ca_Kabuli_denovo             | 7563332                        | (C/G)       |
| 18443       | CakSNP18443    | <i>Kabuli</i>    | Ca_Kabuli_denovo             | 7569104                        | (T/A)       |
| 18444       | CakSNP18444    | <i>Kabuli</i>    | Ca_Kabuli_denovo             | 7569136                        | (A/C)       |
| 18445       | CakSNP18445    | <i>Kabuli</i>    | Ca_Kabuli_denovo             | 7571356                        | (C/G)       |
| 18446       | CakSNP18446    | <i>Kabuli</i>    | Ca_Kabuli_denovo             | 7581291                        | (T/C)       |
| 18447       | CakSNP18447    | <i>Kabuli</i>    | Ca_Kabuli_denovo             | 7583443                        | (T/G)       |
| 18448       | CakSNP18448    | <i>Kabuli</i>    | Ca_Kabuli_denovo             | 7586717                        | (T/C)       |
| 18449       | CakSNP18449    | <i>Kabuli</i>    | Ca_Kabuli_denovo             | 7587722                        | (T/G)       |
| 18450       | CakSNP18450    | <i>Kabuli</i>    | Ca_Kabuli_denovo             | 7590523                        | (A/G)       |
| 18451       | CakSNP18451    | <i>Kabuli</i>    | Ca_Kabuli_denovo             | 7597523                        | (G/A)       |
| 18452       | CakSNP18452    | <i>Kabuli</i>    | Ca_Kabuli_denovo             | 7597543                        | (G/T)       |
| 18453       | CakSNP18453    | <i>Kabuli</i>    | Ca_Kabuli_denovo             | 7599351                        | (A/G)       |
| 18454       | CakSNP18454    | <i>Kabuli</i>    | Ca_Kabuli_denovo             | 7599355                        | (G/A)       |
| 18455       | CakSNP18455    | <i>Kabuli</i>    | Ca_Kabuli_denovo             | 7607382                        | (C/T)       |
| 18456       | CakSNP18456    | <i>Kabuli</i>    | Ca_Kabuli_denovo             | 7619139                        | (G/A)       |
| 18457       | CakSNP18457    | <i>Kabuli</i>    | Ca_Kabuli_denovo             | 7619163                        | (G/A)       |
| 18458       | CakSNP18458    | <i>Kabuli</i>    | Ca_Kabuli_denovo             | 7621274                        | (A/G)       |
| 18459       | CakSNP18459    | <i>Kabuli</i>    | Ca_Kabuli_denovo             | 7621346                        | (T/C)       |
| 18460       | CakSNP18460    | <i>Kabuli</i>    | Ca_Kabuli_denovo             | 7632661                        | (A/G)       |
| 18461       | CakSNP18461    | <i>Kabuli</i>    | Ca_Kabuli_denovo             | 7632682                        | (C/T)       |
| 18462       | CakSNP18462    | <i>Kabuli</i>    | Ca_Kabuli_denovo             | 7634464                        | (G/A)       |
| 18463       | CakSNP18463    | <i>Kabuli</i>    | Ca_Kabuli_denovo             | 7638848                        | (C/G)       |
| 18464       | CakSNP18464    | <i>Kabuli</i>    | Ca_Kabuli_denovo             | 7638917                        | (A/C)       |
| 18465       | CakSNP18465    | <i>Kabuli</i>    | Ca_Kabuli_denovo             | 7642288                        | (A/G)       |
| 18466       | CakSNP18466    | <i>Kabuli</i>    | Ca_Kabuli_denovo             | 7644157                        | (G/A)       |
| 18467       | CakSNP18467    | <i>Kabuli</i>    | Ca_Kabuli_denovo             | 7644247                        | (C/G)       |



| <b>S.N.</b> | <b>SNP IDs</b> | <b>Cultivars</b> | <b>Chromosomes/scaffolds</b> | <b>Physical positions (bp)</b> | <b>SNPs</b> |
|-------------|----------------|------------------|------------------------------|--------------------------------|-------------|
| 18468       | CakSNP18468    | <i>Kabuli</i>    | Ca_Kabuli_denovo             | 7644265                        | (C/T)       |
| 18469       | CakSNP18469    | <i>Kabuli</i>    | Ca_Kabuli_denovo             | 7644275                        | (G/A)       |
| 18470       | CakSNP18470    | <i>Kabuli</i>    | Ca_Kabuli_denovo             | 7644306                        | (G/A)       |
| 18471       | CakSNP18471    | <i>Kabuli</i>    | Ca_Kabuli_denovo             | 7647077                        | (G/A)       |
| 18472       | CakSNP18472    | <i>Kabuli</i>    | Ca_Kabuli_denovo             | 7659948                        | (T/A)       |
| 18473       | CakSNP18473    | <i>Kabuli</i>    | Ca_Kabuli_denovo             | 7660004                        | (A/G)       |
| 18474       | CakSNP18474    | <i>Kabuli</i>    | Ca_Kabuli_denovo             | 7661617                        | (G/T)       |
| 18475       | CakSNP18475    | <i>Kabuli</i>    | Ca_Kabuli_denovo             | 7662572                        | (C/G)       |
| 18476       | CakSNP18476    | <i>Kabuli</i>    | Ca_Kabuli_denovo             | 7662608                        | (A/G)       |
| 18477       | CakSNP18477    | <i>Kabuli</i>    | Ca_Kabuli_denovo             | 7663940                        | (A/C)       |
| 18478       | CakSNP18478    | <i>Kabuli</i>    | Ca_Kabuli_denovo             | 7663942                        | (A/G)       |
| 18479       | CakSNP18479    | <i>Kabuli</i>    | Ca_Kabuli_denovo             | 7665276                        | (G/A)       |
| 18480       | CakSNP18480    | <i>Kabuli</i>    | Ca_Kabuli_denovo             | 7668261                        | (C/T)       |
| 18481       | CakSNP18481    | <i>Kabuli</i>    | Ca_Kabuli_denovo             | 7668301                        | (T/C)       |
| 18482       | CakSNP18482    | <i>Kabuli</i>    | Ca_Kabuli_denovo             | 7671493                        | (C/T)       |
| 18483       | CakSNP18483    | <i>Kabuli</i>    | Ca_Kabuli_denovo             | 7671508                        | (T/C)       |
| 18484       | CakSNP18484    | <i>Kabuli</i>    | Ca_Kabuli_denovo             | 7674683                        | (A/C)       |
| 18485       | CakSNP18485    | <i>Kabuli</i>    | Ca_Kabuli_denovo             | 7679874                        | (G/C)       |
| 18486       | CakSNP18486    | <i>Kabuli</i>    | Ca_Kabuli_denovo             | 7681981                        | (G/T)       |
| 18487       | CakSNP18487    | <i>Kabuli</i>    | Ca_Kabuli_denovo             | 7686913                        | (A/C)       |
| 18488       | CakSNP18488    | <i>Kabuli</i>    | Ca_Kabuli_denovo             | 7686915                        | (G/A)       |
| 18489       | CakSNP18489    | <i>Kabuli</i>    | Ca_Kabuli_denovo             | 7689434                        | (G/A)       |
| 18490       | CakSNP18490    | <i>Kabuli</i>    | Ca_Kabuli_denovo             | 7689491                        | (G/A)       |
| 18491       | CakSNP18491    | <i>Kabuli</i>    | Ca_Kabuli_denovo             | 7694767                        | (C/T)       |
| 18492       | CakSNP18492    | <i>Kabuli</i>    | Ca_Kabuli_denovo             | 7694773                        | (T/C)       |
| 18493       | CakSNP18493    | <i>Kabuli</i>    | Ca_Kabuli_denovo             | 7696282                        | (C/T)       |
| 18494       | CakSNP18494    | <i>Kabuli</i>    | Ca_Kabuli_denovo             | 7698789                        | (G/C)       |
| 18495       | CakSNP18495    | <i>Kabuli</i>    | Ca_Kabuli_denovo             | 7707323                        | (G/A)       |
| 18496       | CakSNP18496    | <i>Kabuli</i>    | Ca_Kabuli_denovo             | 7713250                        | (C/T)       |
| 18497       | CakSNP18497    | <i>Kabuli</i>    | Ca_Kabuli_denovo             | 7713283                        | (C/A)       |
| 18498       | CakSNP18498    | <i>Kabuli</i>    | Ca_Kabuli_denovo             | 7714197                        | (A/G)       |
| 18499       | CakSNP18499    | <i>Kabuli</i>    | Ca_Kabuli_denovo             | 7719731                        | (G/A)       |
| 18500       | CakSNP18500    | <i>Kabuli</i>    | Ca_Kabuli_denovo             | 7722023                        | (T/G)       |
| 18501       | CakSNP18501    | <i>Kabuli</i>    | Ca_Kabuli_denovo             | 7722035                        | (G/T)       |
| 18502       | CakSNP18502    | <i>Kabuli</i>    | Ca_Kabuli_denovo             | 7736605                        | (G/A)       |
| 18503       | CakSNP18503    | <i>Kabuli</i>    | Ca_Kabuli_denovo             | 7740036                        | (T/A)       |
| 18504       | CakSNP18504    | <i>Kabuli</i>    | Ca_Kabuli_denovo             | 7742921                        | (A/G)       |
| 18505       | CakSNP18505    | <i>Kabuli</i>    | Ca_Kabuli_denovo             | 7742924                        | (T/G)       |

| <b>S.N.</b> | <b>SNP IDs</b> | <b>Cultivars</b> | <b>Chromosomes/scaffolds</b> | <b>Physical positions (bp)</b> | <b>SNPs</b> |
|-------------|----------------|------------------|------------------------------|--------------------------------|-------------|
| 18506       | CakSNP18506    | <i>Kabuli</i>    | Ca_Kabuli_denovo             | 7744414                        | (C/T)       |
| 18507       | CakSNP18507    | <i>Kabuli</i>    | Ca_Kabuli_denovo             | 7749013                        | (C/T)       |
| 18508       | CakSNP18508    | <i>Kabuli</i>    | Ca_Kabuli_denovo             | 7755838                        | (A/G)       |
| 18509       | CakSNP18509    | <i>Kabuli</i>    | Ca_Kabuli_denovo             | 7757665                        | (G/T)       |
| 18510       | CakSNP18510    | <i>Kabuli</i>    | Ca_Kabuli_denovo             | 7763638                        | (A/C)       |
| 18511       | CakSNP18511    | <i>Kabuli</i>    | Ca_Kabuli_denovo             | 7763641                        | (T/A)       |
| 18512       | CakSNP18512    | <i>Kabuli</i>    | Ca_Kabuli_denovo             | 7773005                        | (C/G)       |
| 18513       | CakSNP18513    | <i>Kabuli</i>    | Ca_Kabuli_denovo             | 7773497                        | (C/T)       |
| 18514       | CakSNP18514    | <i>Kabuli</i>    | Ca_Kabuli_denovo             | 7775131                        | (C/A)       |
| 18515       | CakSNP18515    | <i>Kabuli</i>    | Ca_Kabuli_denovo             | 7777349                        | (G/A)       |
| 18516       | CakSNP18516    | <i>Kabuli</i>    | Ca_Kabuli_denovo             | 7777355                        | (C/G)       |
| 18517       | CakSNP18517    | <i>Kabuli</i>    | Ca_Kabuli_denovo             | 7780110                        | (T/C)       |
| 18518       | CakSNP18518    | <i>Kabuli</i>    | Ca_Kabuli_denovo             | 7780147                        | (T/C)       |
| 18519       | CakSNP18519    | <i>Kabuli</i>    | Ca_Kabuli_denovo             | 7780424                        | (T/G)       |
| 18520       | CakSNP18520    | <i>Kabuli</i>    | Ca_Kabuli_denovo             | 7783550                        | (T/C)       |
| 18521       | CakSNP18521    | <i>Kabuli</i>    | Ca_Kabuli_denovo             | 7784298                        | (A/G)       |
| 18522       | CakSNP18522    | <i>Kabuli</i>    | Ca_Kabuli_denovo             | 7784355                        | (G/A)       |
| 18523       | CakSNP18523    | <i>Kabuli</i>    | Ca_Kabuli_denovo             | 7786066                        | (A/G)       |
| 18524       | CakSNP18524    | <i>Kabuli</i>    | Ca_Kabuli_denovo             | 7786092                        | (T/C)       |
| 18525       | CakSNP18525    | <i>Kabuli</i>    | Ca_Kabuli_denovo             | 7788204                        | (T/C)       |
| 18526       | CakSNP18526    | <i>Kabuli</i>    | Ca_Kabuli_denovo             | 7789221                        | (T/C)       |
| 18527       | CakSNP18527    | <i>Kabuli</i>    | Ca_Kabuli_denovo             | 7789301                        | (C/T)       |
| 18528       | CakSNP18528    | <i>Kabuli</i>    | Ca_Kabuli_denovo             | 7793891                        | (G/C)       |
| 18529       | CakSNP18529    | <i>Kabuli</i>    | Ca_Kabuli_denovo             | 7793893                        | (C/A)       |
| 18530       | CakSNP18530    | <i>Kabuli</i>    | Ca_Kabuli_denovo             | 7797598                        | (A/G)       |
| 18531       | CakSNP18531    | <i>Kabuli</i>    | Ca_Kabuli_denovo             | 7801499                        | (T/C)       |
| 18532       | CakSNP18532    | <i>Kabuli</i>    | Ca_Kabuli_denovo             | 7803930                        | (G/A)       |
| 18533       | CakSNP18533    | <i>Kabuli</i>    | Ca_Kabuli_denovo             | 7803960                        | (T/C)       |
| 18534       | CakSNP18534    | <i>Kabuli</i>    | Ca_Kabuli_denovo             | 7808478                        | (T/C)       |
| 18535       | CakSNP18535    | <i>Kabuli</i>    | Ca_Kabuli_denovo             | 7811193                        | (T/C)       |
| 18536       | CakSNP18536    | <i>Kabuli</i>    | Ca_Kabuli_denovo             | 7811229                        | (T/C)       |
| 18537       | CakSNP18537    | <i>Kabuli</i>    | Ca_Kabuli_denovo             | 7815667                        | (G/T)       |
| 18538       | CakSNP18538    | <i>Kabuli</i>    | Ca_Kabuli_denovo             | 7817621                        | (G/C)       |
| 18539       | CakSNP18539    | <i>Kabuli</i>    | Ca_Kabuli_denovo             | 7817663                        | (T/C)       |
| 18540       | CakSNP18540    | <i>Kabuli</i>    | Ca_Kabuli_denovo             | 7819661                        | (A/G)       |
| 18541       | CakSNP18541    | <i>Kabuli</i>    | Ca_Kabuli_denovo             | 7819688                        | (C/T)       |
| 18542       | CakSNP18542    | <i>Kabuli</i>    | Ca_Kabuli_denovo             | 7821392                        | (A/T)       |
| 18543       | CakSNP18543    | <i>Kabuli</i>    | Ca_Kabuli_denovo             | 7822168                        | (T/C)       |

| <b>S.N.</b> | <b>SNP IDs</b> | <b>Cultivars</b> | <b>Chromosomes/scaffolds</b> | <b>Physical positions (bp)</b> | <b>SNPs</b> |
|-------------|----------------|------------------|------------------------------|--------------------------------|-------------|
| 18544       | CakSNP18544    | <i>Kabuli</i>    | Ca_Kabuli_denovo             | 7823280                        | (G/A)       |
| 18545       | CakSNP18545    | <i>Kabuli</i>    | Ca_Kabuli_denovo             | 7825450                        | (C/A)       |
| 18546       | CakSNP18546    | <i>Kabuli</i>    | Ca_Kabuli_denovo             | 7832200                        | (T/G)       |
| 18547       | CakSNP18547    | <i>Kabuli</i>    | Ca_Kabuli_denovo             | 7833031                        | (G/A)       |
| 18548       | CakSNP18548    | <i>Kabuli</i>    | Ca_Kabuli_denovo             | 7842059                        | (A/G)       |
| 18549       | CakSNP18549    | <i>Kabuli</i>    | Ca_Kabuli_denovo             | 7845807                        | (C/A)       |
| 18550       | CakSNP18550    | <i>Kabuli</i>    | Ca_Kabuli_denovo             | 7845827                        | (C/A)       |
| 18551       | CakSNP18551    | <i>Kabuli</i>    | Ca_Kabuli_denovo             | 7851012                        | (G/A)       |
| 18552       | CakSNP18552    | <i>Kabuli</i>    | Ca_Kabuli_denovo             | 7851036                        | (T/C)       |
| 18553       | CakSNP18553    | <i>Kabuli</i>    | Ca_Kabuli_denovo             | 7851360                        | (G/A)       |
| 18554       | CakSNP18554    | <i>Kabuli</i>    | Ca_Kabuli_denovo             | 7851364                        | (C/G)       |
| 18555       | CakSNP18555    | <i>Kabuli</i>    | Ca_Kabuli_denovo             | 7851413                        | (A/G)       |
| 18556       | CakSNP18556    | <i>Kabuli</i>    | Ca_Kabuli_denovo             | 7855438                        | (T/C)       |
| 18557       | CakSNP18557    | <i>Kabuli</i>    | Ca_Kabuli_denovo             | 7855500                        | (A/G)       |
| 18558       | CakSNP18558    | <i>Kabuli</i>    | Ca_Kabuli_denovo             | 7858167                        | (T/C)       |
| 18559       | CakSNP18559    | <i>Kabuli</i>    | Ca_Kabuli_denovo             | 7866944                        | (C/T)       |
| 18560       | CakSNP18560    | <i>Kabuli</i>    | Ca_Kabuli_denovo             | 7867542                        | (A/G)       |
| 18561       | CakSNP18561    | <i>Kabuli</i>    | Ca_Kabuli_denovo             | 7867799                        | (A/C)       |
| 18562       | CakSNP18562    | <i>Kabuli</i>    | Ca_Kabuli_denovo             | 7876080                        | (A/T)       |
| 18563       | CakSNP18563    | <i>Kabuli</i>    | Ca_Kabuli_denovo             | 7880716                        | (A/T)       |
| 18564       | CakSNP18564    | <i>Kabuli</i>    | Ca_Kabuli_denovo             | 7880717                        | (C/T)       |
| 18565       | CakSNP18565    | <i>Kabuli</i>    | Ca_Kabuli_denovo             | 7881296                        | (G/A)       |
| 18566       | CakSNP18566    | <i>Kabuli</i>    | Ca_Kabuli_denovo             | 7881314                        | (G/A)       |
| 18567       | CakSNP18567    | <i>Kabuli</i>    | Ca_Kabuli_denovo             | 7887564                        | (C/T)       |
| 18568       | CakSNP18568    | <i>Kabuli</i>    | Ca_Kabuli_denovo             | 7888564                        | (A/G)       |
| 18569       | CakSNP18569    | <i>Kabuli</i>    | Ca_Kabuli_denovo             | 7892719                        | (T/C)       |
| 18570       | CakSNP18570    | <i>Kabuli</i>    | Ca_Kabuli_denovo             | 7894702                        | (C/A)       |
| 18571       | CakSNP18571    | <i>Kabuli</i>    | Ca_Kabuli_denovo             | 7894708                        | (G/C)       |
| 18572       | CakSNP18572    | <i>Kabuli</i>    | Ca_Kabuli_denovo             | 7897351                        | (G/A)       |
| 18573       | CakSNP18573    | <i>Kabuli</i>    | Ca_Kabuli_denovo             | 7897373                        | (A/C)       |
| 18574       | CakSNP18574    | <i>Kabuli</i>    | Ca_Kabuli_denovo             | 7900400                        | (T/C)       |
| 18575       | CakSNP18575    | <i>Kabuli</i>    | Ca_Kabuli_denovo             | 7901584                        | (A/G)       |
| 18576       | CakSNP18576    | <i>Kabuli</i>    | Ca_Kabuli_denovo             | 7901585                        | (T/C)       |
| 18577       | CakSNP18577    | <i>Kabuli</i>    | Ca_Kabuli_denovo             | 7910500                        | (C/T)       |
| 18578       | CakSNP18578    | <i>Kabuli</i>    | Ca_Kabuli_denovo             | 7910554                        | (G/A)       |
| 18579       | CakSNP18579    | <i>Kabuli</i>    | Ca_Kabuli_denovo             | 7920197                        | (C/T)       |
| 18580       | CakSNP18580    | <i>Kabuli</i>    | Ca_Kabuli_denovo             | 7920209                        | (G/A)       |
| 18581       | CakSNP18581    | <i>Kabuli</i>    | Ca_Kabuli_denovo             | 7930088                        | (T/G)       |

| <b>S.N.</b> | <b>SNP IDs</b> | <b>Cultivars</b> | <b>Chromosomes/scaffolds</b> | <b>Physical positions (bp)</b> | <b>SNPs</b> |
|-------------|----------------|------------------|------------------------------|--------------------------------|-------------|
| 18582       | CakSNP18582    | <i>Kabuli</i>    | Ca_Kabuli_denovo             | 7936283                        | (C/T)       |
| 18583       | CakSNP18583    | <i>Kabuli</i>    | Ca_Kabuli_denovo             | 7936329                        | (T/G)       |
| 18584       | CakSNP18584    | <i>Kabuli</i>    | Ca_Kabuli_denovo             | 7941133                        | (C/T)       |
| 18585       | CakSNP18585    | <i>Kabuli</i>    | Ca_Kabuli_denovo             | 7941147                        | (T/C)       |
| 18586       | CakSNP18586    | <i>Kabuli</i>    | Ca_Kabuli_denovo             | 7945108                        | (G/A)       |
| 18587       | CakSNP18587    | <i>Kabuli</i>    | Ca_Kabuli_denovo             | 7949240                        | (G/C)       |
| 18588       | CakSNP18588    | <i>Kabuli</i>    | Ca_Kabuli_denovo             | 7949247                        | (G/C)       |
| 18589       | CakSNP18589    | <i>Kabuli</i>    | Ca_Kabuli_denovo             | 7952539                        | (A/G)       |
| 18590       | CakSNP18590    | <i>Kabuli</i>    | Ca_Kabuli_denovo             | 7952565                        | (T/C)       |
| 18591       | CakSNP18591    | <i>Kabuli</i>    | Ca_Kabuli_denovo             | 7953341                        | (G/C)       |
| 18592       | CakSNP18592    | <i>Kabuli</i>    | Ca_Kabuli_denovo             | 7955422                        | (T/C)       |
| 18593       | CakSNP18593    | <i>Kabuli</i>    | Ca_Kabuli_denovo             | 7955973                        | (G/C)       |
| 18594       | CakSNP18594    | <i>Kabuli</i>    | Ca_Kabuli_denovo             | 7955994                        | (G/T)       |
| 18595       | CakSNP18595    | <i>Kabuli</i>    | Ca_Kabuli_denovo             | 7956631                        | (T/C)       |
| 18596       | CakSNP18596    | <i>Kabuli</i>    | Ca_Kabuli_denovo             | 7960635                        | (C/T)       |
| 18597       | CakSNP18597    | <i>Kabuli</i>    | Ca_Kabuli_denovo             | 7962856                        | (C/T)       |
| 18598       | CakSNP18598    | <i>Kabuli</i>    | Ca_Kabuli_denovo             | 7962883                        | (G/C)       |
| 18599       | CakSNP18599    | <i>Kabuli</i>    | Ca_Kabuli_denovo             | 7963369                        | (A/G)       |
| 18600       | CakSNP18600    | <i>Kabuli</i>    | Ca_Kabuli_denovo             | 7963390                        | (G/C)       |
| 18601       | CakSNP18601    | <i>Kabuli</i>    | Ca_Kabuli_denovo             | 7970950                        | (G/C)       |
| 18602       | CakSNP18602    | <i>Kabuli</i>    | Ca_Kabuli_denovo             | 7974031                        | (G/C)       |
| 18603       | CakSNP18603    | <i>Kabuli</i>    | Ca_Kabuli_denovo             | 7974052                        | (C/G)       |
| 18604       | CakSNP18604    | <i>Kabuli</i>    | Ca_Kabuli_denovo             | 7982597                        | (A/G)       |
| 18605       | CakSNP18605    | <i>Kabuli</i>    | Ca_Kabuli_denovo             | 7988467                        | (G/A)       |
| 18606       | CakSNP18606    | <i>Kabuli</i>    | Ca_Kabuli_denovo             | 7995056                        | (A/G)       |
| 18607       | CakSNP18607    | <i>Kabuli</i>    | Ca_Kabuli_denovo             | 7995068                        | (C/T)       |
| 18608       | CakSNP18608    | <i>Kabuli</i>    | Ca_Kabuli_denovo             | 7997461                        | (T/C)       |
| 18609       | CakSNP18609    | <i>Kabuli</i>    | Ca_Kabuli_denovo             | 7999842                        | (T/G)       |
| 18610       | CakSNP18610    | <i>Kabuli</i>    | Ca_Kabuli_denovo             | 7999848                        | (T/A)       |
| 18611       | CakSNP18611    | <i>Kabuli</i>    | Ca_Kabuli_denovo             | 8001503                        | (T/C)       |
| 18612       | CakSNP18612    | <i>Kabuli</i>    | Ca_Kabuli_denovo             | 8003727                        | (A/G)       |
| 18613       | CakSNP18613    | <i>Kabuli</i>    | Ca_Kabuli_denovo             | 8003736                        | (A/G)       |
| 18614       | CakSNP18614    | <i>Kabuli</i>    | Ca_Kabuli_denovo             | 8011242                        | (G/C)       |
| 18615       | CakSNP18615    | <i>Kabuli</i>    | Ca_Kabuli_denovo             | 8011262                        | (C/T)       |
| 18616       | CakSNP18616    | <i>Kabuli</i>    | Ca_Kabuli_denovo             | 8013352                        | (C/T)       |
| 18617       | CakSNP18617    | <i>Kabuli</i>    | Ca_Kabuli_denovo             | 8019793                        | (C/A)       |
| 18618       | CakSNP18618    | <i>Kabuli</i>    | Ca_Kabuli_denovo             | 8022307                        | (G/A)       |
| 18619       | CakSNP18619    | <i>Kabuli</i>    | Ca_Kabuli_denovo             | 8022322                        | (C/G)       |

| <b>S.N.</b> | <b>SNP IDs</b> | <b>Cultivars</b> | <b>Chromosomes/scaffolds</b> | <b>Physical positions (bp)</b> | <b>SNPs</b> |
|-------------|----------------|------------------|------------------------------|--------------------------------|-------------|
| 18620       | CakSNP18620    | <i>Kabuli</i>    | Ca_Kabuli_denovo             | 8022996                        | (A/G)       |
| 18621       | CakSNP18621    | <i>Kabuli</i>    | Ca_Kabuli_denovo             | 8026787                        | (T/G)       |
| 18622       | CakSNP18622    | <i>Kabuli</i>    | Ca_Kabuli_denovo             | 8026830                        | (G/C)       |
| 18623       | CakSNP18623    | <i>Kabuli</i>    | Ca_Kabuli_denovo             | 8027198                        | (T/C)       |
| 18624       | CakSNP18624    | <i>Kabuli</i>    | Ca_Kabuli_denovo             | 8027199                        | (T/C)       |
| 18625       | CakSNP18625    | <i>Kabuli</i>    | Ca_Kabuli_denovo             | 8039817                        | (T/C)       |
| 18626       | CakSNP18626    | <i>Kabuli</i>    | Ca_Kabuli_denovo             | 8041747                        | (T/C)       |
| 18627       | CakSNP18627    | <i>Kabuli</i>    | Ca_Kabuli_denovo             | 8041759                        | (C/A)       |
| 18628       | CakSNP18628    | <i>Kabuli</i>    | Ca_Kabuli_denovo             | 8043209                        | (A/G)       |
| 18629       | CakSNP18629    | <i>Kabuli</i>    | Ca_Kabuli_denovo             | 8043253                        | (T/C)       |
| 18630       | CakSNP18630    | <i>Kabuli</i>    | Ca_Kabuli_denovo             | 8044069                        | (A/G)       |
| 18631       | CakSNP18631    | <i>Kabuli</i>    | Ca_Kabuli_denovo             | 8044129                        | (G/A)       |
| 18632       | CakSNP18632    | <i>Kabuli</i>    | Ca_Kabuli_denovo             | 8045895                        | (A/G)       |
| 18633       | CakSNP18633    | <i>Kabuli</i>    | Ca_Kabuli_denovo             | 8051714                        | (T/C)       |
| 18634       | CakSNP18634    | <i>Kabuli</i>    | Ca_Kabuli_denovo             | 8057562                        | (G/A)       |
| 18635       | CakSNP18635    | <i>Kabuli</i>    | Ca_Kabuli_denovo             | 8063940                        | (A/T)       |
| 18636       | CakSNP18636    | <i>Kabuli</i>    | Ca_Kabuli_denovo             | 8069087                        | (C/A)       |
| 18637       | CakSNP18637    | <i>Kabuli</i>    | Ca_Kabuli_denovo             | 8069369                        | (G/C)       |
| 18638       | CakSNP18638    | <i>Kabuli</i>    | Ca_Kabuli_denovo             | 8070193                        | (G/C)       |
| 18639       | CakSNP18639    | <i>Kabuli</i>    | Ca_Kabuli_denovo             | 8070240                        | (T/C)       |
| 18640       | CakSNP18640    | <i>Kabuli</i>    | Ca_Kabuli_denovo             | 8072550                        | (C/T)       |
| 18641       | CakSNP18641    | <i>Kabuli</i>    | Ca_Kabuli_denovo             | 8082932                        | (G/A)       |
| 18642       | CakSNP18642    | <i>Kabuli</i>    | Ca_Kabuli_denovo             | 8083232                        | (A/G)       |
| 18643       | CakSNP18643    | <i>Kabuli</i>    | Ca_Kabuli_denovo             | 8087512                        | (A/G)       |
| 18644       | CakSNP18644    | <i>Kabuli</i>    | Ca_Kabuli_denovo             | 8087573                        | (A/G)       |
| 18645       | CakSNP18645    | <i>Kabuli</i>    | Ca_Kabuli_denovo             | 8088037                        | (C/G)       |
| 18646       | CakSNP18646    | <i>Kabuli</i>    | Ca_Kabuli_denovo             | 8088041                        | (T/C)       |
| 18647       | CakSNP18647    | <i>Kabuli</i>    | Ca_Kabuli_denovo             | 8088319                        | (C/T)       |
| 18648       | CakSNP18648    | <i>Kabuli</i>    | Ca_Kabuli_denovo             | 8088322                        | (G/C)       |
| 18649       | CakSNP18649    | <i>Kabuli</i>    | Ca_Kabuli_denovo             | 8094162                        | (A/C)       |
| 18650       | CakSNP18650    | <i>Kabuli</i>    | Ca_Kabuli_denovo             | 8098520                        | (A/G)       |
| 18651       | CakSNP18651    | <i>Kabuli</i>    | Ca_Kabuli_denovo             | 8105899                        | (T/G)       |
| 18652       | CakSNP18652    | <i>Kabuli</i>    | Ca_Kabuli_denovo             | 8105968                        | (T/C)       |
| 18653       | CakSNP18653    | <i>Kabuli</i>    | Ca_Kabuli_denovo             | 8109763                        | (A/C)       |
| 18654       | CakSNP18654    | <i>Kabuli</i>    | Ca_Kabuli_denovo             | 8112263                        | (A/G)       |
| 18655       | CakSNP18655    | <i>Kabuli</i>    | Ca_Kabuli_denovo             | 8112296                        | (A/C)       |
| 18656       | CakSNP18656    | <i>Kabuli</i>    | Ca_Kabuli_denovo             | 8112297                        | (G/C)       |
| 18657       | CakSNP18657    | <i>Kabuli</i>    | Ca_Kabuli_denovo             | 8115320                        | (A/G)       |

| <b>S.N.</b> | <b>SNP IDs</b> | <b>Cultivars</b> | <b>Chromosomes/scaffolds</b> | <b>Physical positions (bp)</b> | <b>SNPs</b> |
|-------------|----------------|------------------|------------------------------|--------------------------------|-------------|
| 18658       | CakSNP18658    | <i>Kabuli</i>    | Ca_Kabuli_denovo             | 8122096                        | (T/C)       |
| 18659       | CakSNP18659    | <i>Kabuli</i>    | Ca_Kabuli_denovo             | 8130858                        | (G/A)       |
| 18660       | CakSNP18660    | <i>Kabuli</i>    | Ca_Kabuli_denovo             | 8130859                        | (C/G)       |
| 18661       | CakSNP18661    | <i>Kabuli</i>    | Ca_Kabuli_denovo             | 8137324                        | (C/T)       |
| 18662       | CakSNP18662    | <i>Kabuli</i>    | Ca_Kabuli_denovo             | 8137330                        | (T/G)       |
| 18663       | CakSNP18663    | <i>Kabuli</i>    | Ca_Kabuli_denovo             | 8141933                        | (A/G)       |
| 18664       | CakSNP18664    | <i>Kabuli</i>    | Ca_Kabuli_denovo             | 8144021                        | (A/C)       |
| 18665       | CakSNP18665    | <i>Kabuli</i>    | Ca_Kabuli_denovo             | 8144078                        | (G/A)       |
| 18666       | CakSNP18666    | <i>Kabuli</i>    | Ca_Kabuli_denovo             | 8148859                        | (G/A)       |
| 18667       | CakSNP18667    | <i>Kabuli</i>    | Ca_Kabuli_denovo             | 8148868                        | (C/A)       |
| 18668       | CakSNP18668    | <i>Kabuli</i>    | Ca_Kabuli_denovo             | 8149952                        | (C/G)       |
| 18669       | CakSNP18669    | <i>Kabuli</i>    | Ca_Kabuli_denovo             | 8149954                        | (A/G)       |
| 18670       | CakSNP18670    | <i>Kabuli</i>    | Ca_Kabuli_denovo             | 8154225                        | (C/A)       |
| 18671       | CakSNP18671    | <i>Kabuli</i>    | Ca_Kabuli_denovo             | 8158725                        | (C/T)       |
| 18672       | CakSNP18672    | <i>Kabuli</i>    | Ca_Kabuli_denovo             | 8158779                        | (T/C)       |
| 18673       | CakSNP18673    | <i>Kabuli</i>    | Ca_Kabuli_denovo             | 8159110                        | (A/G)       |
| 18674       | CakSNP18674    | <i>Kabuli</i>    | Ca_Kabuli_denovo             | 8159113                        | (A/G)       |
| 18675       | CakSNP18675    | <i>Kabuli</i>    | Ca_Kabuli_denovo             | 8168485                        | (A/G)       |
| 18676       | CakSNP18676    | <i>Kabuli</i>    | Ca_Kabuli_denovo             | 8169341                        | (C/G)       |
| 18677       | CakSNP18677    | <i>Kabuli</i>    | Ca_Kabuli_denovo             | 8171387                        | (G/C)       |
| 18678       | CakSNP18678    | <i>Kabuli</i>    | Ca_Kabuli_denovo             | 8178754                        | (T/C)       |
| 18679       | CakSNP18679    | <i>Kabuli</i>    | Ca_Kabuli_denovo             | 8184848                        | (C/A)       |
| 18680       | CakSNP18680    | <i>Kabuli</i>    | Ca_Kabuli_denovo             | 8189540                        | (A/C)       |
| 18681       | CakSNP18681    | <i>Kabuli</i>    | Ca_Kabuli_denovo             | 8196300                        | (T/C)       |
| 18682       | CakSNP18682    | <i>Kabuli</i>    | Ca_Kabuli_denovo             | 8196341                        | (C/G)       |
| 18683       | CakSNP18683    | <i>Kabuli</i>    | Ca_Kabuli_denovo             | 8203367                        | (G/A)       |
| 18684       | CakSNP18684    | <i>Kabuli</i>    | Ca_Kabuli_denovo             | 8207563                        | (C/T)       |
| 18685       | CakSNP18685    | <i>Kabuli</i>    | Ca_Kabuli_denovo             | 8210958                        | (C/G)       |
| 18686       | CakSNP18686    | <i>Kabuli</i>    | Ca_Kabuli_denovo             | 8211907                        | (A/G)       |
| 18687       | CakSNP18687    | <i>Kabuli</i>    | Ca_Kabuli_denovo             | 8214133                        | (A/G)       |
| 18688       | CakSNP18688    | <i>Kabuli</i>    | Ca_Kabuli_denovo             | 8214554                        | (T/C)       |
| 18689       | CakSNP18689    | <i>Kabuli</i>    | Ca_Kabuli_denovo             | 8214590                        | (A/G)       |
| 18690       | CakSNP18690    | <i>Kabuli</i>    | Ca_Kabuli_denovo             | 8217362                        | (A/G)       |
| 18691       | CakSNP18691    | <i>Kabuli</i>    | Ca_Kabuli_denovo             | 8218000                        | (C/G)       |
| 18692       | CakSNP18692    | <i>Kabuli</i>    | Ca_Kabuli_denovo             | 8218005                        | (A/C)       |
| 18693       | CakSNP18693    | <i>Kabuli</i>    | Ca_Kabuli_denovo             | 8219090                        | (G/T)       |
| 18694       | CakSNP18694    | <i>Kabuli</i>    | Ca_Kabuli_denovo             | 8223822                        | (C/G)       |
| 18695       | CakSNP18695    | <i>Kabuli</i>    | Ca_Kabuli_denovo             | 8226812                        | (C/T)       |

| <b>S.N.</b> | <b>SNP IDs</b> | <b>Cultivars</b> | <b>Chromosomes/scaffolds</b> | <b>Physical positions (bp)</b> | <b>SNPs</b> |
|-------------|----------------|------------------|------------------------------|--------------------------------|-------------|
| 18696       | CakSNP18696    | <i>Kabuli</i>    | Ca_Kabuli_denovo             | 8230958                        | (C/G)       |
| 18697       | CakSNP18697    | <i>Kabuli</i>    | Ca_Kabuli_denovo             | 8230966                        | (A/T)       |
| 18698       | CakSNP18698    | <i>Kabuli</i>    | Ca_Kabuli_denovo             | 8232844                        | (G/A)       |
| 18699       | CakSNP18699    | <i>Kabuli</i>    | Ca_Kabuli_denovo             | 8232880                        | (G/A)       |
| 18700       | CakSNP18700    | <i>Kabuli</i>    | Ca_Kabuli_denovo             | 8234144                        | (A/G)       |
| 18701       | CakSNP18701    | <i>Kabuli</i>    | Ca_Kabuli_denovo             | 8234153                        | (C/G)       |
| 18702       | CakSNP18702    | <i>Kabuli</i>    | Ca_Kabuli_denovo             | 8241946                        | (C/T)       |
| 18703       | CakSNP18703    | <i>Kabuli</i>    | Ca_Kabuli_denovo             | 8241952                        | (C/T)       |
| 18704       | CakSNP18704    | <i>Kabuli</i>    | Ca_Kabuli_denovo             | 8242371                        | (G/A)       |
| 18705       | CakSNP18705    | <i>Kabuli</i>    | Ca_Kabuli_denovo             | 8243836                        | (T/C)       |
| 18706       | CakSNP18706    | <i>Kabuli</i>    | Ca_Kabuli_denovo             | 8244667                        | (C/T)       |
| 18707       | CakSNP18707    | <i>Kabuli</i>    | Ca_Kabuli_denovo             | 8249352                        | (C/A)       |
| 18708       | CakSNP18708    | <i>Kabuli</i>    | Ca_Kabuli_denovo             | 8256558                        | (C/T)       |
| 18709       | CakSNP18709    | <i>Kabuli</i>    | Ca_Kabuli_denovo             | 8256561                        | (C/T)       |
| 18710       | CakSNP18710    | <i>Kabuli</i>    | Ca_Kabuli_denovo             | 8257059                        | (C/T)       |
| 18711       | CakSNP18711    | <i>Kabuli</i>    | Ca_Kabuli_denovo             | 8257088                        | (A/G)       |
| 18712       | CakSNP18712    | <i>Kabuli</i>    | Ca_Kabuli_denovo             | 8261284                        | (C/G)       |
| 18713       | CakSNP18713    | <i>Kabuli</i>    | Ca_Kabuli_denovo             | 8266889                        | (C/T)       |
| 18714       | CakSNP18714    | <i>Kabuli</i>    | Ca_Kabuli_denovo             | 8269821                        | (A/G)       |
| 18715       | CakSNP18715    | <i>Kabuli</i>    | Ca_Kabuli_denovo             | 8271190                        | (C/G)       |
| 18716       | CakSNP18716    | <i>Kabuli</i>    | Ca_Kabuli_denovo             | 8271195                        | (G/C)       |
| 18717       | CakSNP18717    | <i>Kabuli</i>    | Ca_Kabuli_denovo             | 8283720                        | (C/T)       |
| 18718       | CakSNP18718    | <i>Kabuli</i>    | Ca_Kabuli_denovo             | 8283723                        | (T/C)       |
| 18719       | CakSNP18719    | <i>Kabuli</i>    | Ca_Kabuli_denovo             | 8287800                        | (G/T)       |
| 18720       | CakSNP18720    | <i>Kabuli</i>    | Ca_Kabuli_denovo             | 8289104                        | (C/T)       |
| 18721       | CakSNP18721    | <i>Kabuli</i>    | Ca_Kabuli_denovo             | 8293206                        | (G/T)       |
| 18722       | CakSNP18722    | <i>Kabuli</i>    | Ca_Kabuli_denovo             | 8297749                        | (A/C)       |
| 18723       | CakSNP18723    | <i>Kabuli</i>    | Ca_Kabuli_denovo             | 8300470                        | (T/G)       |
| 18724       | CakSNP18724    | <i>Kabuli</i>    | Ca_Kabuli_denovo             | 8300931                        | (A/G)       |
| 18725       | CakSNP18725    | <i>Kabuli</i>    | Ca_Kabuli_denovo             | 8300939                        | (T/A)       |
| 18726       | CakSNP18726    | <i>Kabuli</i>    | Ca_Kabuli_denovo             | 8303497                        | (T/C)       |
| 18727       | CakSNP18727    | <i>Kabuli</i>    | Ca_Kabuli_denovo             | 8303505                        | (C/G)       |
| 18728       | CakSNP18728    | <i>Kabuli</i>    | Ca_Kabuli_denovo             | 8305655                        | (A/G)       |
| 18729       | CakSNP18729    | <i>Kabuli</i>    | Ca_Kabuli_denovo             | 8305661                        | (G/A)       |
| 18730       | CakSNP18730    | <i>Kabuli</i>    | Ca_Kabuli_denovo             | 8306153                        | (G/A)       |
| 18731       | CakSNP18731    | <i>Kabuli</i>    | Ca_Kabuli_denovo             | 8317400                        | (G/C)       |
| 18732       | CakSNP18732    | <i>Kabuli</i>    | Ca_Kabuli_denovo             | 8317564                        | (G/C)       |
| 18733       | CakSNP18733    | <i>Kabuli</i>    | Ca_Kabuli_denovo             | 8317582                        | (C/T)       |

| <b>S.N.</b> | <b>SNP IDs</b> | <b>Cultivars</b> | <b>Chromosomes/scaffolds</b> | <b>Physical positions (bp)</b> | <b>SNPs</b> |
|-------------|----------------|------------------|------------------------------|--------------------------------|-------------|
| 18734       | CakSNP18734    | <i>Kabuli</i>    | Ca_Kabuli_denovo             | 8321061                        | (C/T)       |
| 18735       | CakSNP18735    | <i>Kabuli</i>    | Ca_Kabuli_denovo             | 8322931                        | (G/A)       |
| 18736       | CakSNP18736    | <i>Kabuli</i>    | Ca_Kabuli_denovo             | 8325194                        | (C/T)       |
| 18737       | CakSNP18737    | <i>Kabuli</i>    | Ca_Kabuli_denovo             | 8325213                        | (C/A)       |
| 18738       | CakSNP18738    | <i>Kabuli</i>    | Ca_Kabuli_denovo             | 8327042                        | (C/T)       |
| 18739       | CakSNP18739    | <i>Kabuli</i>    | Ca_Kabuli_denovo             | 8327887                        | (A/G)       |
| 18740       | CakSNP18740    | <i>Kabuli</i>    | Ca_Kabuli_denovo             | 8327890                        | (A/G)       |
| 18741       | CakSNP18741    | <i>Kabuli</i>    | Ca_Kabuli_denovo             | 8328850                        | (G/A)       |
| 18742       | CakSNP18742    | <i>Kabuli</i>    | Ca_Kabuli_denovo             | 8329853                        | (G/T)       |
| 18743       | CakSNP18743    | <i>Kabuli</i>    | Ca_Kabuli_denovo             | 8329859                        | (G/A)       |
| 18744       | CakSNP18744    | <i>Kabuli</i>    | Ca_Kabuli_denovo             | 8331379                        | (C/T)       |
| 18745       | CakSNP18745    | <i>Kabuli</i>    | Ca_Kabuli_denovo             | 8335396                        | (T/C)       |
| 18746       | CakSNP18746    | <i>Kabuli</i>    | Ca_Kabuli_denovo             | 8335402                        | (T/G)       |
| 18747       | CakSNP18747    | <i>Kabuli</i>    | Ca_Kabuli_denovo             | 8336646                        | (G/C)       |
| 18748       | CakSNP18748    | <i>Kabuli</i>    | Ca_Kabuli_denovo             | 8336655                        | (T/C)       |
| 18749       | CakSNP18749    | <i>Kabuli</i>    | Ca_Kabuli_denovo             | 8336819                        | (G/A)       |
| 18750       | CakSNP18750    | <i>Kabuli</i>    | Ca_Kabuli_denovo             | 8336864                        | (A/G)       |
| 18751       | CakSNP18751    | <i>Kabuli</i>    | Ca_Kabuli_denovo             | 8337449                        | (T/G)       |
| 18752       | CakSNP18752    | <i>Kabuli</i>    | Ca_Kabuli_denovo             | 8343165                        | (A/G)       |
| 18753       | CakSNP18753    | <i>Kabuli</i>    | Ca_Kabuli_denovo             | 8349391                        | (G/C)       |
| 18754       | CakSNP18754    | <i>Kabuli</i>    | Ca_Kabuli_denovo             | 8349400                        | (C/T)       |
| 18755       | CakSNP18755    | <i>Kabuli</i>    | Ca_Kabuli_denovo             | 8350117                        | (T/G)       |
| 18756       | CakSNP18756    | <i>Kabuli</i>    | Ca_Kabuli_denovo             | 8350148                        | (C/G)       |
| 18757       | CakSNP18757    | <i>Kabuli</i>    | Ca_Kabuli_denovo             | 8353015                        | (G/T)       |
| 18758       | CakSNP18758    | <i>Kabuli</i>    | Ca_Kabuli_denovo             | 8354669                        | (A/T)       |
| 18759       | CakSNP18759    | <i>Kabuli</i>    | Ca_Kabuli_denovo             | 8354690                        | (T/C)       |
| 18760       | CakSNP18760    | <i>Kabuli</i>    | Ca_Kabuli_denovo             | 8355827                        | (T/G)       |
| 18761       | CakSNP18761    | <i>Kabuli</i>    | Ca_Kabuli_denovo             | 8360991                        | (C/A)       |
| 18762       | CakSNP18762    | <i>Kabuli</i>    | Ca_Kabuli_denovo             | 8361061                        | (G/A)       |
| 18763       | CakSNP18763    | <i>Kabuli</i>    | Ca_Kabuli_denovo             | 8365868                        | (T/C)       |
| 18764       | CakSNP18764    | <i>Kabuli</i>    | Ca_Kabuli_denovo             | 8365899                        | (G/A)       |
| 18765       | CakSNP18765    | <i>Kabuli</i>    | Ca_Kabuli_denovo             | 8379869                        | (A/C)       |
| 18766       | CakSNP18766    | <i>Kabuli</i>    | Ca_Kabuli_denovo             | 8380718                        | (C/G)       |
| 18767       | CakSNP18767    | <i>Kabuli</i>    | Ca_Kabuli_denovo             | 8380722                        | (G/A)       |
| 18768       | CakSNP18768    | <i>Kabuli</i>    | Ca_Kabuli_denovo             | 8391995                        | (A/G)       |
| 18769       | CakSNP18769    | <i>Kabuli</i>    | Ca_Kabuli_denovo             | 8392015                        | (A/C)       |
| 18770       | CakSNP18770    | <i>Kabuli</i>    | Ca_Kabuli_denovo             | 8400805                        | (C/T)       |
| 18771       | CakSNP18771    | <i>Kabuli</i>    | Ca_Kabuli_denovo             | 8405558                        | (A/G)       |



| <b>S.N.</b> | <b>SNP IDs</b> | <b>Cultivars</b> | <b>Chromosomes/scaffolds</b> | <b>Physical positions (bp)</b> | <b>SNPs</b> |
|-------------|----------------|------------------|------------------------------|--------------------------------|-------------|
| 18772       | CakSNP18772    | <i>Kabuli</i>    | Ca_Kabuli_denovo             | 8405615                        | (T/C)       |
| 18773       | CakSNP18773    | <i>Kabuli</i>    | Ca_Kabuli_denovo             | 8409196                        | (T/C)       |
| 18774       | CakSNP18774    | <i>Kabuli</i>    | Ca_Kabuli_denovo             | 8409374                        | (T/C)       |
| 18775       | CakSNP18775    | <i>Kabuli</i>    | Ca_Kabuli_denovo             | 8411035                        | (T/G)       |
| 18776       | CakSNP18776    | <i>Kabuli</i>    | Ca_Kabuli_denovo             | 8411059                        | (T/G)       |
| 18777       | CakSNP18777    | <i>Kabuli</i>    | Ca_Kabuli_denovo             | 8413267                        | (G/C)       |
| 18778       | CakSNP18778    | <i>Kabuli</i>    | Ca_Kabuli_denovo             | 8413291                        | (A/C)       |
| 18779       | CakSNP18779    | <i>Kabuli</i>    | Ca_Kabuli_denovo             | 8416177                        | (T/C)       |
| 18780       | CakSNP18780    | <i>Kabuli</i>    | Ca_Kabuli_denovo             | 8416180                        | (T/C)       |
| 18781       | CakSNP18781    | <i>Kabuli</i>    | Ca_Kabuli_denovo             | 8417405                        | (T/G)       |
| 18782       | CakSNP18782    | <i>Kabuli</i>    | Ca_Kabuli_denovo             | 8417948                        | (G/T)       |
| 18783       | CakSNP18783    | <i>Kabuli</i>    | Ca_Kabuli_denovo             | 8418116                        | (G/C)       |
| 18784       | CakSNP18784    | <i>Kabuli</i>    | Ca_Kabuli_denovo             | 8418159                        | (T/C)       |
| 18785       | CakSNP18785    | <i>Kabuli</i>    | Ca_Kabuli_denovo             | 8419456                        | (C/G)       |
| 18786       | CakSNP18786    | <i>Kabuli</i>    | Ca_Kabuli_denovo             | 8420072                        | (A/C)       |
| 18787       | CakSNP18787    | <i>Kabuli</i>    | Ca_Kabuli_denovo             | 8422556                        | (T/C)       |
| 18788       | CakSNP18788    | <i>Kabuli</i>    | Ca_Kabuli_denovo             | 8423156                        | (T/C)       |
| 18789       | CakSNP18789    | <i>Kabuli</i>    | Ca_Kabuli_denovo             | 8429766                        | (A/C)       |
| 18790       | CakSNP18790    | <i>Kabuli</i>    | Ca_Kabuli_denovo             | 8436507                        | (C/T)       |
| 18791       | CakSNP18791    | <i>Kabuli</i>    | Ca_Kabuli_denovo             | 8436561                        | (G/A)       |
| 18792       | CakSNP18792    | <i>Kabuli</i>    | Ca_Kabuli_denovo             | 8438196                        | (T/G)       |
| 18793       | CakSNP18793    | <i>Kabuli</i>    | Ca_Kabuli_denovo             | 8438207                        | (G/C)       |
| 18794       | CakSNP18794    | <i>Kabuli</i>    | Ca_Kabuli_denovo             | 8448425                        | (G/C)       |
| 18795       | CakSNP18795    | <i>Kabuli</i>    | Ca_Kabuli_denovo             | 8448815                        | (C/A)       |
| 18796       | CakSNP18796    | <i>Kabuli</i>    | Ca_Kabuli_denovo             | 8452890                        | (T/G)       |
| 18797       | CakSNP18797    | <i>Kabuli</i>    | Ca_Kabuli_denovo             | 8454266                        | (T/C)       |
| 18798       | CakSNP18798    | <i>Kabuli</i>    | Ca_Kabuli_denovo             | 8460560                        | (C/A)       |
| 18799       | CakSNP18799    | <i>Kabuli</i>    | Ca_Kabuli_denovo             | 8461914                        | (C/G)       |
| 18800       | CakSNP18800    | <i>Kabuli</i>    | Ca_Kabuli_denovo             | 8466689                        | (A/G)       |
| 18801       | CakSNP18801    | <i>Kabuli</i>    | Ca_Kabuli_denovo             | 8469963                        | (A/G)       |
| 18802       | CakSNP18802    | <i>Kabuli</i>    | Ca_Kabuli_denovo             | 8469975                        | (C/A)       |
| 18803       | CakSNP18803    | <i>Kabuli</i>    | Ca_Kabuli_denovo             | 8479007                        | (G/T)       |
| 18804       | CakSNP18804    | <i>Kabuli</i>    | Ca_Kabuli_denovo             | 8479010                        | (C/G)       |
| 18805       | CakSNP18805    | <i>Kabuli</i>    | Ca_Kabuli_denovo             | 8480432                        | (C/G)       |
| 18806       | CakSNP18806    | <i>Kabuli</i>    | Ca_Kabuli_denovo             | 8480589                        | (C/T)       |
| 18807       | CakSNP18807    | <i>Kabuli</i>    | Ca_Kabuli_denovo             | 8483863                        | (T/C)       |
| 18808       | CakSNP18808    | <i>Kabuli</i>    | Ca_Kabuli_denovo             | 8486588                        | (G/T)       |
| 18809       | CakSNP18809    | <i>Kabuli</i>    | Ca_Kabuli_denovo             | 8489504                        | (G/A)       |

| <b>S.N.</b> | <b>SNP IDs</b> | <b>Cultivars</b> | <b>Chromosomes/scaffolds</b> | <b>Physical positions (bp)</b> | <b>SNPs</b> |
|-------------|----------------|------------------|------------------------------|--------------------------------|-------------|
| 18810       | CakSNP18810    | <i>Kabuli</i>    | Ca_Kabuli_denovo             | 8492446                        | (C/G)       |
| 18811       | CakSNP18811    | <i>Kabuli</i>    | Ca_Kabuli_denovo             | 8492462                        | (A/T)       |
| 18812       | CakSNP18812    | <i>Kabuli</i>    | Ca_Kabuli_denovo             | 8496663                        | (T/G)       |
| 18813       | CakSNP18813    | <i>Kabuli</i>    | Ca_Kabuli_denovo             | 8503771                        | (T/C)       |
| 18814       | CakSNP18814    | <i>Kabuli</i>    | Ca_Kabuli_denovo             | 8503785                        | (T/G)       |
| 18815       | CakSNP18815    | <i>Kabuli</i>    | Ca_Kabuli_denovo             | 8503798                        | (A/G)       |
| 18816       | CakSNP18816    | <i>Kabuli</i>    | Ca_Kabuli_denovo             | 8505482                        | (T/C)       |
| 18817       | CakSNP18817    | <i>Kabuli</i>    | Ca_Kabuli_denovo             | 8505765                        | (G/A)       |
| 18818       | CakSNP18818    | <i>Kabuli</i>    | Ca_Kabuli_denovo             | 8509639                        | (A/G)       |
| 18819       | CakSNP18819    | <i>Kabuli</i>    | Ca_Kabuli_denovo             | 8509669                        | (G/A)       |
| 18820       | CakSNP18820    | <i>Kabuli</i>    | Ca_Kabuli_denovo             | 8513119                        | (A/C)       |
| 18821       | CakSNP18821    | <i>Kabuli</i>    | Ca_Kabuli_denovo             | 8530754                        | (T/C)       |
| 18822       | CakSNP18822    | <i>Kabuli</i>    | Ca_Kabuli_denovo             | 8530755                        | (T/G)       |
| 18823       | CakSNP18823    | <i>Kabuli</i>    | Ca_Kabuli_denovo             | 8531674                        | (C/T)       |
| 18824       | CakSNP18824    | <i>Kabuli</i>    | Ca_Kabuli_denovo             | 8531701                        | (A/T)       |
| 18825       | CakSNP18825    | <i>Kabuli</i>    | Ca_Kabuli_denovo             | 8531753                        | (G/C)       |
| 18826       | CakSNP18826    | <i>Kabuli</i>    | Ca_Kabuli_denovo             | 8531795                        | (G/A)       |
| 18827       | CakSNP18827    | <i>Kabuli</i>    | Ca_Kabuli_denovo             | 8533432                        | (C/T)       |
| 18828       | CakSNP18828    | <i>Kabuli</i>    | Ca_Kabuli_denovo             | 8533441                        | (A/C)       |
| 18829       | CakSNP18829    | <i>Kabuli</i>    | Ca_Kabuli_denovo             | 8533970                        | (A/C)       |
| 18830       | CakSNP18830    | <i>Kabuli</i>    | Ca_Kabuli_denovo             | 8533990                        | (T/C)       |
| 18831       | CakSNP18831    | <i>Kabuli</i>    | Ca_Kabuli_denovo             | 8534449                        | (G/A)       |
| 18832       | CakSNP18832    | <i>Kabuli</i>    | Ca_Kabuli_denovo             | 8550060                        | (A/G)       |
| 18833       | CakSNP18833    | <i>Kabuli</i>    | Ca_Kabuli_denovo             | 8554253                        | (A/T)       |
| 18834       | CakSNP18834    | <i>Kabuli</i>    | Ca_Kabuli_denovo             | 8554325                        | (G/A)       |
| 18835       | CakSNP18835    | <i>Kabuli</i>    | Ca_Kabuli_denovo             | 8556197                        | (G/T)       |
| 18836       | CakSNP18836    | <i>Kabuli</i>    | Ca_Kabuli_denovo             | 8556200                        | (A/G)       |
| 18837       | CakSNP18837    | <i>Kabuli</i>    | Ca_Kabuli_denovo             | 8556235                        | (C/T)       |
| 18838       | CakSNP18838    | <i>Kabuli</i>    | Ca_Kabuli_denovo             | 8560474                        | (C/G)       |
| 18839       | CakSNP18839    | <i>Kabuli</i>    | Ca_Kabuli_denovo             | 8560544                        | (A/C)       |
| 18840       | CakSNP18840    | <i>Kabuli</i>    | Ca_Kabuli_denovo             | 8562341                        | (G/C)       |
| 18841       | CakSNP18841    | <i>Kabuli</i>    | Ca_Kabuli_denovo             | 8566053                        | (G/T)       |
| 18842       | CakSNP18842    | <i>Kabuli</i>    | Ca_Kabuli_denovo             | 8566099                        | (C/T)       |
| 18843       | CakSNP18843    | <i>Kabuli</i>    | Ca_Kabuli_denovo             | 8571259                        | (A/G)       |
| 18844       | CakSNP18844    | <i>Kabuli</i>    | Ca_Kabuli_denovo             | 8573599                        | (A/T)       |
| 18845       | CakSNP18845    | <i>Kabuli</i>    | Ca_Kabuli_denovo             | 8578805                        | (A/C)       |
| 18846       | CakSNP18846    | <i>Kabuli</i>    | Ca_Kabuli_denovo             | 8580661                        | (G/C)       |
| 18847       | CakSNP18847    | <i>Kabuli</i>    | Ca_Kabuli_denovo             | 8580697                        | (G/T)       |

| <b>S.N.</b> | <b>SNP IDs</b> | <b>Cultivars</b> | <b>Chromosomes/scaffolds</b> | <b>Physical positions (bp)</b> | <b>SNPs</b> |
|-------------|----------------|------------------|------------------------------|--------------------------------|-------------|
| 18848       | CakSNP18848    | <i>Kabuli</i>    | Ca_Kabuli_denovo             | 8581281                        | (G/A)       |
| 18849       | CakSNP18849    | <i>Kabuli</i>    | Ca_Kabuli_denovo             | 8584477                        | (A/G)       |
| 18850       | CakSNP18850    | <i>Kabuli</i>    | Ca_Kabuli_denovo             | 8584479                        | (C/A)       |
| 18851       | CakSNP18851    | <i>Kabuli</i>    | Ca_Kabuli_denovo             | 8584858                        | (T/C)       |
| 18852       | CakSNP18852    | <i>Kabuli</i>    | Ca_Kabuli_denovo             | 8584877                        | (G/A)       |
| 18853       | CakSNP18853    | <i>Kabuli</i>    | Ca_Kabuli_denovo             | 8593352                        | (G/C)       |
| 18854       | CakSNP18854    | <i>Kabuli</i>    | Ca_Kabuli_denovo             | 8593359                        | (A/C)       |
| 18855       | CakSNP18855    | <i>Kabuli</i>    | Ca_Kabuli_denovo             | 8603638                        | (C/T)       |
| 18856       | CakSNP18856    | <i>Kabuli</i>    | Ca_Kabuli_denovo             | 8603707                        | (C/A)       |
| 18857       | CakSNP18857    | <i>Kabuli</i>    | Ca_Kabuli_denovo             | 8607036                        | (T/C)       |
| 18858       | CakSNP18858    | <i>Kabuli</i>    | Ca_Kabuli_denovo             | 8623968                        | (C/A)       |
| 18859       | CakSNP18859    | <i>Kabuli</i>    | Ca_Kabuli_denovo             | 8626120                        | (T/C)       |
| 18860       | CakSNP18860    | <i>Kabuli</i>    | Ca_Kabuli_denovo             | 8626123                        | (C/T)       |
| 18861       | CakSNP18861    | <i>Kabuli</i>    | Ca_Kabuli_denovo             | 8629836                        | (A/C)       |
| 18862       | CakSNP18862    | <i>Kabuli</i>    | Ca_Kabuli_denovo             | 8629837                        | (G/C)       |
| 18863       | CakSNP18863    | <i>Kabuli</i>    | Ca_Kabuli_denovo             | 8629839                        | (T/C)       |
| 18864       | CakSNP18864    | <i>Kabuli</i>    | Ca_Kabuli_denovo             | 8630141                        | (T/G)       |
| 18865       | CakSNP18865    | <i>Kabuli</i>    | Ca_Kabuli_denovo             | 8630199                        | (G/C)       |
| 18866       | CakSNP18866    | <i>Kabuli</i>    | Ca_Kabuli_denovo             | 8633226                        | (G/A)       |
| 18867       | CakSNP18867    | <i>Kabuli</i>    | Ca_Kabuli_denovo             | 8633271                        | (G/T)       |
| 18868       | CakSNP18868    | <i>Kabuli</i>    | Ca_Kabuli_denovo             | 8634180                        | (T/C)       |
| 18869       | CakSNP18869    | <i>Kabuli</i>    | Ca_Kabuli_denovo             | 8634188                        | (A/G)       |
| 18870       | CakSNP18870    | <i>Kabuli</i>    | Ca_Kabuli_denovo             | 8642988                        | (A/C)       |
| 18871       | CakSNP18871    | <i>Kabuli</i>    | Ca_Kabuli_denovo             | 8652511                        | (T/A)       |
| 18872       | CakSNP18872    | <i>Kabuli</i>    | Ca_Kabuli_denovo             | 8656524                        | (G/C)       |
| 18873       | CakSNP18873    | <i>Kabuli</i>    | Ca_Kabuli_denovo             | 8657680                        | (G/T)       |
| 18874       | CakSNP18874    | <i>Kabuli</i>    | Ca_Kabuli_denovo             | 8661307                        | (A/G)       |
| 18875       | CakSNP18875    | <i>Kabuli</i>    | Ca_Kabuli_denovo             | 8661312                        | (G/A)       |
| 18876       | CakSNP18876    | <i>Kabuli</i>    | Ca_Kabuli_denovo             | 8665424                        | (G/A)       |
| 18877       | CakSNP18877    | <i>Kabuli</i>    | Ca_Kabuli_denovo             | 8677202                        | (C/T)       |
| 18878       | CakSNP18878    | <i>Kabuli</i>    | Ca_Kabuli_denovo             | 8677253                        | (T/C)       |
| 18879       | CakSNP18879    | <i>Kabuli</i>    | Ca_Kabuli_denovo             | 8683447                        | (T/C)       |
| 18880       | CakSNP18880    | <i>Kabuli</i>    | Ca_Kabuli_denovo             | 8683473                        | (T/C)       |
| 18881       | CakSNP18881    | <i>Kabuli</i>    | Ca_Kabuli_denovo             | 8688554                        | (G/A)       |
| 18882       | CakSNP18882    | <i>Kabuli</i>    | Ca_Kabuli_denovo             | 8692558                        | (A/G)       |
| 18883       | CakSNP18883    | <i>Kabuli</i>    | Ca_Kabuli_denovo             | 8697009                        | (A/G)       |
| 18884       | CakSNP18884    | <i>Kabuli</i>    | Ca_Kabuli_denovo             | 8701182                        | (C/T)       |
| 18885       | CakSNP18885    | <i>Kabuli</i>    | Ca_Kabuli_denovo             | 8706399                        | (C/T)       |

| <b>S.N.</b> | <b>SNP IDs</b> | <b>Cultivars</b> | <b>Chromosomes/scaffolds</b> | <b>Physical positions (bp)</b> | <b>SNPs</b> |
|-------------|----------------|------------------|------------------------------|--------------------------------|-------------|
| 18886       | CakSNP18886    | <i>Kabuli</i>    | Ca_Kabuli_denovo             | 8712116                        | (C/T)       |
| 18887       | CakSNP18887    | <i>Kabuli</i>    | Ca_Kabuli_denovo             | 8712137                        | (C/G)       |
| 18888       | CakSNP18888    | <i>Kabuli</i>    | Ca_Kabuli_denovo             | 8713270                        | (C/A)       |
| 18889       | CakSNP18889    | <i>Kabuli</i>    | Ca_Kabuli_denovo             | 8713287                        | (T/G)       |
| 18890       | CakSNP18890    | <i>Kabuli</i>    | Ca_Kabuli_denovo             | 8714821                        | (G/A)       |
| 18891       | CakSNP18891    | <i>Kabuli</i>    | Ca_Kabuli_denovo             | 8717740                        | (T/C)       |
| 18892       | CakSNP18892    | <i>Kabuli</i>    | Ca_Kabuli_denovo             | 8717768                        | (G/C)       |
| 18893       | CakSNP18893    | <i>Kabuli</i>    | Ca_Kabuli_denovo             | 8718318                        | (T/G)       |
| 18894       | CakSNP18894    | <i>Kabuli</i>    | Ca_Kabuli_denovo             | 8723450                        | (C/T)       |
| 18895       | CakSNP18895    | <i>Kabuli</i>    | Ca_Kabuli_denovo             | 8728039                        | (C/T)       |
| 18896       | CakSNP18896    | <i>Kabuli</i>    | Ca_Kabuli_denovo             | 8728049                        | (T/G)       |
| 18897       | CakSNP18897    | <i>Kabuli</i>    | Ca_Kabuli_denovo             | 8733667                        | (G/T)       |
| 18898       | CakSNP18898    | <i>Kabuli</i>    | Ca_Kabuli_denovo             | 8737564                        | (A/G)       |
| 18899       | CakSNP18899    | <i>Kabuli</i>    | Ca_Kabuli_denovo             | 8740252                        | (C/T)       |
| 18900       | CakSNP18900    | <i>Kabuli</i>    | Ca_Kabuli_denovo             | 8741945                        | (G/A)       |
| 18901       | CakSNP18901    | <i>Kabuli</i>    | Ca_Kabuli_denovo             | 8743682                        | (C/A)       |
| 18902       | CakSNP18902    | <i>Kabuli</i>    | Ca_Kabuli_denovo             | 8745896                        | (T/G)       |
| 18903       | CakSNP18903    | <i>Kabuli</i>    | Ca_Kabuli_denovo             | 8746884                        | (A/G)       |
| 18904       | CakSNP18904    | <i>Kabuli</i>    | Ca_Kabuli_denovo             | 8749660                        | (G/A)       |
| 18905       | CakSNP18905    | <i>Kabuli</i>    | Ca_Kabuli_denovo             | 8749690                        | (C/G)       |
| 18906       | CakSNP18906    | <i>Kabuli</i>    | Ca_Kabuli_denovo             | 8751619                        | (C/A)       |
| 18907       | CakSNP18907    | <i>Kabuli</i>    | Ca_Kabuli_denovo             | 8751625                        | (C/T)       |
| 18908       | CakSNP18908    | <i>Kabuli</i>    | Ca_Kabuli_denovo             | 8754866                        | (C/G)       |
| 18909       | CakSNP18909    | <i>Kabuli</i>    | Ca_Kabuli_denovo             | 8756405                        | (T/A)       |
| 18910       | CakSNP18910    | <i>Kabuli</i>    | Ca_Kabuli_denovo             | 8762906                        | (T/C)       |
| 18911       | CakSNP18911    | <i>Kabuli</i>    | Ca_Kabuli_denovo             | 8764006                        | (C/G)       |
| 18912       | CakSNP18912    | <i>Kabuli</i>    | Ca_Kabuli_denovo             | 8773383                        | (C/A)       |
| 18913       | CakSNP18913    | <i>Kabuli</i>    | Ca_Kabuli_denovo             | 8783399                        | (C/T)       |
| 18914       | CakSNP18914    | <i>Kabuli</i>    | Ca_Kabuli_denovo             | 8785543                        | (T/A)       |
| 18915       | CakSNP18915    | <i>Kabuli</i>    | Ca_Kabuli_denovo             | 8785573                        | (G/A)       |
| 18916       | CakSNP18916    | <i>Kabuli</i>    | Ca_Kabuli_denovo             | 8785912                        | (A/G)       |
| 18917       | CakSNP18917    | <i>Kabuli</i>    | Ca_Kabuli_denovo             | 8785983                        | (A/C)       |
| 18918       | CakSNP18918    | <i>Kabuli</i>    | Ca_Kabuli_denovo             | 8786375                        | (C/T)       |
| 18919       | CakSNP18919    | <i>Kabuli</i>    | Ca_Kabuli_denovo             | 8786405                        | (T/C)       |
| 18920       | CakSNP18920    | <i>Kabuli</i>    | Ca_Kabuli_denovo             | 8790559                        | (G/A)       |
| 18921       | CakSNP18921    | <i>Kabuli</i>    | Ca_Kabuli_denovo             | 8793365                        | (T/C)       |
| 18922       | CakSNP18922    | <i>Kabuli</i>    | Ca_Kabuli_denovo             | 8797171                        | (C/A)       |
| 18923       | CakSNP18923    | <i>Kabuli</i>    | Ca_Kabuli_denovo             | 8797219                        | (T/C)       |

| <b>S.N.</b> | <b>SNP IDs</b> | <b>Cultivars</b> | <b>Chromosomes/scaffolds</b> | <b>Physical positions (bp)</b> | <b>SNPs</b> |
|-------------|----------------|------------------|------------------------------|--------------------------------|-------------|
| 18924       | CakSNP18924    | <i>Kabuli</i>    | Ca_Kabuli_denovo             | 8802899                        | (C/T)       |
| 18925       | CakSNP18925    | <i>Kabuli</i>    | Ca_Kabuli_denovo             | 8802968                        | (C/A)       |
| 18926       | CakSNP18926    | <i>Kabuli</i>    | Ca_Kabuli_denovo             | 8802970                        | (C/G)       |
| 18927       | CakSNP18927    | <i>Kabuli</i>    | Ca_Kabuli_denovo             | 8817440                        | (T/C)       |
| 18928       | CakSNP18928    | <i>Kabuli</i>    | Ca_Kabuli_denovo             | 8817510                        | (C/A)       |
| 18929       | CakSNP18929    | <i>Kabuli</i>    | Ca_Kabuli_denovo             | 8821101                        | (C/T)       |
| 18930       | CakSNP18930    | <i>Kabuli</i>    | Ca_Kabuli_denovo             | 8835782                        | (A/C)       |
| 18931       | CakSNP18931    | <i>Kabuli</i>    | Ca_Kabuli_denovo             | 8837267                        | (C/G)       |
| 18932       | CakSNP18932    | <i>Kabuli</i>    | Ca_Kabuli_denovo             | 8837276                        | (C/G)       |
| 18933       | CakSNP18933    | <i>Kabuli</i>    | Ca_Kabuli_denovo             | 8839300                        | (G/C)       |
| 18934       | CakSNP18934    | <i>Kabuli</i>    | Ca_Kabuli_denovo             | 8839943                        | (C/T)       |
| 18935       | CakSNP18935    | <i>Kabuli</i>    | Ca_Kabuli_denovo             | 8839950                        | (G/A)       |
| 18936       | CakSNP18936    | <i>Kabuli</i>    | Ca_Kabuli_denovo             | 8841891                        | (C/G)       |
| 18937       | CakSNP18937    | <i>Kabuli</i>    | Ca_Kabuli_denovo             | 8843216                        | (T/C)       |
| 18938       | CakSNP18938    | <i>Kabuli</i>    | Ca_Kabuli_denovo             | 8846463                        | (T/C)       |
| 18939       | CakSNP18939    | <i>Kabuli</i>    | Ca_Kabuli_denovo             | 8847644                        | (T/G)       |
| 18940       | CakSNP18940    | <i>Kabuli</i>    | Ca_Kabuli_denovo             | 8847757                        | (A/T)       |
| 18941       | CakSNP18941    | <i>Kabuli</i>    | Ca_Kabuli_denovo             | 8847796                        | (A/G)       |
| 18942       | CakSNP18942    | <i>Kabuli</i>    | Ca_Kabuli_denovo             | 8852097                        | (T/G)       |
| 18943       | CakSNP18943    | <i>Kabuli</i>    | Ca_Kabuli_denovo             | 8855774                        | (G/C)       |
| 18944       | CakSNP18944    | <i>Kabuli</i>    | Ca_Kabuli_denovo             | 8856170                        | (A/C)       |
| 18945       | CakSNP18945    | <i>Kabuli</i>    | Ca_Kabuli_denovo             | 8857655                        | (A/T)       |
| 18946       | CakSNP18946    | <i>Kabuli</i>    | Ca_Kabuli_denovo             | 8858498                        | (A/G)       |
| 18947       | CakSNP18947    | <i>Kabuli</i>    | Ca_Kabuli_denovo             | 8864720                        | (T/G)       |
| 18948       | CakSNP18948    | <i>Kabuli</i>    | Ca_Kabuli_denovo             | 8869813                        | (G/A)       |
| 18949       | CakSNP18949    | <i>Kabuli</i>    | Ca_Kabuli_denovo             | 8881500                        | (A/C)       |
| 18950       | CakSNP18950    | <i>Kabuli</i>    | Ca_Kabuli_denovo             | 8881501                        | (G/A)       |
| 18951       | CakSNP18951    | <i>Kabuli</i>    | Ca_Kabuli_denovo             | 8882179                        | (C/T)       |
| 18952       | CakSNP18952    | <i>Kabuli</i>    | Ca_Kabuli_denovo             | 8882231                        | (G/A)       |
| 18953       | CakSNP18953    | <i>Kabuli</i>    | Ca_Kabuli_denovo             | 8885140                        | (A/C)       |
| 18954       | CakSNP18954    | <i>Kabuli</i>    | Ca_Kabuli_denovo             | 8885204                        | (C/T)       |
| 18955       | CakSNP18955    | <i>Kabuli</i>    | Ca_Kabuli_denovo             | 8887438                        | (T/G)       |
| 18956       | CakSNP18956    | <i>Kabuli</i>    | Ca_Kabuli_denovo             | 8891101                        | (C/T)       |
| 18957       | CakSNP18957    | <i>Kabuli</i>    | Ca_Kabuli_denovo             | 8898477                        | (T/C)       |
| 18958       | CakSNP18958    | <i>Kabuli</i>    | Ca_Kabuli_denovo             | 8903642                        | (A/G)       |
| 18959       | CakSNP18959    | <i>Kabuli</i>    | Ca_Kabuli_denovo             | 8903702                        | (G/A)       |
| 18960       | CakSNP18960    | <i>Kabuli</i>    | Ca_Kabuli_denovo             | 8904259                        | (T/G)       |
| 18961       | CakSNP18961    | <i>Kabuli</i>    | Ca_Kabuli_denovo             | 8910990                        | (A/G)       |

| <b>S.N.</b> | <b>SNP IDs</b> | <b>Cultivars</b> | <b>Chromosomes/scaffolds</b> | <b>Physical positions (bp)</b> | <b>SNPs</b> |
|-------------|----------------|------------------|------------------------------|--------------------------------|-------------|
| 18962       | CakSNP18962    | <i>Kabuli</i>    | Ca_Kabuli_denovo             | 8911135                        | (G/A)       |
| 18963       | CakSNP18963    | <i>Kabuli</i>    | Ca_Kabuli_denovo             | 8911140                        | (G/A)       |
| 18964       | CakSNP18964    | <i>Kabuli</i>    | Ca_Kabuli_denovo             | 8916332                        | (C/A)       |
| 18965       | CakSNP18965    | <i>Kabuli</i>    | Ca_Kabuli_denovo             | 8918015                        | (A/G)       |
| 18966       | CakSNP18966    | <i>Kabuli</i>    | Ca_Kabuli_denovo             | 8918028                        | (C/T)       |
| 18967       | CakSNP18967    | <i>Kabuli</i>    | Ca_Kabuli_denovo             | 8918993                        | (C/T)       |
| 18968       | CakSNP18968    | <i>Kabuli</i>    | Ca_Kabuli_denovo             | 8922620                        | (C/G)       |
| 18969       | CakSNP18969    | <i>Kabuli</i>    | Ca_Kabuli_denovo             | 8922642                        | (T/G)       |
| 18970       | CakSNP18970    | <i>Kabuli</i>    | Ca_Kabuli_denovo             | 8923604                        | (A/G)       |
| 18971       | CakSNP18971    | <i>Kabuli</i>    | Ca_Kabuli_denovo             | 8935945                        | (G/T)       |
| 18972       | CakSNP18972    | <i>Kabuli</i>    | Ca_Kabuli_denovo             | 8941714                        | (G/A)       |
| 18973       | CakSNP18973    | <i>Kabuli</i>    | Ca_Kabuli_denovo             | 8941759                        | (G/A)       |
| 18974       | CakSNP18974    | <i>Kabuli</i>    | Ca_Kabuli_denovo             | 8946705                        | (C/T)       |
| 18975       | CakSNP18975    | <i>Kabuli</i>    | Ca_Kabuli_denovo             | 8946759                        | (C/T)       |
| 18976       | CakSNP18976    | <i>Kabuli</i>    | Ca_Kabuli_denovo             | 8955101                        | (C/T)       |
| 18977       | CakSNP18977    | <i>Kabuli</i>    | Ca_Kabuli_denovo             | 8956392                        | (T/C)       |
| 18978       | CakSNP18978    | <i>Kabuli</i>    | Ca_Kabuli_denovo             | 8956416                        | (A/G)       |
| 18979       | CakSNP18979    | <i>Kabuli</i>    | Ca_Kabuli_denovo             | 8958868                        | (C/A)       |
| 18980       | CakSNP18980    | <i>Kabuli</i>    | Ca_Kabuli_denovo             | 8962549                        | (T/C)       |
| 18981       | CakSNP18981    | <i>Kabuli</i>    | Ca_Kabuli_denovo             | 8969882                        | (C/G)       |
| 18982       | CakSNP18982    | <i>Kabuli</i>    | Ca_Kabuli_denovo             | 8969927                        | (G/A)       |
| 18983       | CakSNP18983    | <i>Kabuli</i>    | Ca_Kabuli_denovo             | 8972239                        | (C/G)       |
| 18984       | CakSNP18984    | <i>Kabuli</i>    | Ca_Kabuli_denovo             | 8979187                        | (A/G)       |
| 18985       | CakSNP18985    | <i>Kabuli</i>    | Ca_Kabuli_denovo             | 8991933                        | (T/C)       |
| 18986       | CakSNP18986    | <i>Kabuli</i>    | Ca_Kabuli_denovo             | 8998274                        | (C/T)       |
| 18987       | CakSNP18987    | <i>Kabuli</i>    | Ca_Kabuli_denovo             | 8998283                        | (G/C)       |
| 18988       | CakSNP18988    | <i>Kabuli</i>    | Ca_Kabuli_denovo             | 8998729                        | (C/G)       |
| 18989       | CakSNP18989    | <i>Kabuli</i>    | Ca_Kabuli_denovo             | 8998743                        | (G/T)       |
| 18990       | CakSNP18990    | <i>Kabuli</i>    | Ca_Kabuli_denovo             | 8999684                        | (C/T)       |
| 18991       | CakSNP18991    | <i>Kabuli</i>    | Ca_Kabuli_denovo             | 8999695                        | (T/C)       |
| 18992       | CakSNP18992    | <i>Kabuli</i>    | Ca_Kabuli_denovo             | 9007535                        | (C/A)       |
| 18993       | CakSNP18993    | <i>Kabuli</i>    | Ca_Kabuli_denovo             | 9007546                        | (A/C)       |
| 18994       | CakSNP18994    | <i>Kabuli</i>    | Ca_Kabuli_denovo             | 9008111                        | (G/A)       |
| 18995       | CakSNP18995    | <i>Kabuli</i>    | Ca_Kabuli_denovo             | 9008153                        | (A/G)       |
| 18996       | CakSNP18996    | <i>Kabuli</i>    | Ca_Kabuli_denovo             | 9009853                        | (T/G)       |
| 18997       | CakSNP18997    | <i>Kabuli</i>    | Ca_Kabuli_denovo             | 9010359                        | (T/C)       |
| 18998       | CakSNP18998    | <i>Kabuli</i>    | Ca_Kabuli_denovo             | 9016466                        | (A/C)       |
| 18999       | CakSNP18999    | <i>Kabuli</i>    | Ca_Kabuli_denovo             | 9016479                        | (C/T)       |

| <b>S.N.</b> | <b>SNP IDs</b> | <b>Cultivars</b> | <b>Chromosomes/scaffolds</b> | <b>Physical positions (bp)</b> | <b>SNPs</b> |
|-------------|----------------|------------------|------------------------------|--------------------------------|-------------|
| 19000       | CakSNP19000    | <i>Kabuli</i>    | Ca_Kabuli_denovo             | 9020583                        | (C/G)       |
| 19001       | CakSNP19001    | <i>Kabuli</i>    | Ca_Kabuli_denovo             | 9020621                        | (A/G)       |
| 19002       | CakSNP19002    | <i>Kabuli</i>    | Ca_Kabuli_denovo             | 9020928                        | (A/G)       |
| 19003       | CakSNP19003    | <i>Kabuli</i>    | Ca_Kabuli_denovo             | 9021373                        | (C/T)       |
| 19004       | CakSNP19004    | <i>Kabuli</i>    | Ca_Kabuli_denovo             | 9025243                        | (C/A)       |
| 19005       | CakSNP19005    | <i>Kabuli</i>    | Ca_Kabuli_denovo             | 9025246                        | (G/C)       |
| 19006       | CakSNP19006    | <i>Kabuli</i>    | Ca_Kabuli_denovo             | 9026799                        | (A/C)       |
| 19007       | CakSNP19007    | <i>Kabuli</i>    | Ca_Kabuli_denovo             | 9028405                        | (C/G)       |
| 19008       | CakSNP19008    | <i>Kabuli</i>    | Ca_Kabuli_denovo             | 9029661                        | (C/T)       |
| 19009       | CakSNP19009    | <i>Kabuli</i>    | Ca_Kabuli_denovo             | 9030509                        | (T/C)       |
| 19010       | CakSNP19010    | <i>Kabuli</i>    | Ca_Kabuli_denovo             | 9034404                        | (A/G)       |
| 19011       | CakSNP19011    | <i>Kabuli</i>    | Ca_Kabuli_denovo             | 9034429                        | (A/C)       |
| 19012       | CakSNP19012    | <i>Kabuli</i>    | Ca_Kabuli_denovo             | 9043273                        | (C/G)       |
| 19013       | CakSNP19013    | <i>Kabuli</i>    | Ca_Kabuli_denovo             | 9043321                        | (C/T)       |
| 19014       | CakSNP19014    | <i>Kabuli</i>    | Ca_Kabuli_denovo             | 9050711                        | (C/G)       |
| 19015       | CakSNP19015    | <i>Kabuli</i>    | Ca_Kabuli_denovo             | 9050747                        | (G/A)       |
| 19016       | CakSNP19016    | <i>Kabuli</i>    | Ca_Kabuli_denovo             | 9056377                        | (A/G)       |
| 19017       | CakSNP19017    | <i>Kabuli</i>    | Ca_Kabuli_denovo             | 9067796                        | (A/G)       |
| 19018       | CakSNP19018    | <i>Kabuli</i>    | Ca_Kabuli_denovo             | 9067797                        | (A/G)       |
| 19019       | CakSNP19019    | <i>Kabuli</i>    | Ca_Kabuli_denovo             | 9068479                        | (A/G)       |
| 19020       | CakSNP19020    | <i>Kabuli</i>    | Ca_Kabuli_denovo             | 9071784                        | (G/A)       |
| 19021       | CakSNP19021    | <i>Kabuli</i>    | Ca_Kabuli_denovo             | 9077263                        | (A/C)       |
| 19022       | CakSNP19022    | <i>Kabuli</i>    | Ca_Kabuli_denovo             | 9077474                        | (T/G)       |
| 19023       | CakSNP19023    | <i>Kabuli</i>    | Ca_Kabuli_denovo             | 9077488                        | (T/C)       |
| 19024       | CakSNP19024    | <i>Kabuli</i>    | Ca_Kabuli_denovo             | 9077513                        | (T/G)       |
| 19025       | CakSNP19025    | <i>Kabuli</i>    | Ca_Kabuli_denovo             | 9077529                        | (T/G)       |
| 19026       | CakSNP19026    | <i>Kabuli</i>    | Ca_Kabuli_denovo             | 9077813                        | (C/T)       |
| 19027       | CakSNP19027    | <i>Kabuli</i>    | Ca_Kabuli_denovo             | 9081380                        | (G/A)       |
| 19028       | CakSNP19028    | <i>Kabuli</i>    | Ca_Kabuli_denovo             | 9081383                        | (C/T)       |
| 19029       | CakSNP19029    | <i>Kabuli</i>    | Ca_Kabuli_denovo             | 9085000                        | (T/C)       |
| 19030       | CakSNP19030    | <i>Kabuli</i>    | Ca_Kabuli_denovo             | 9085051                        | (T/C)       |
| 19031       | CakSNP19031    | <i>Kabuli</i>    | Ca_Kabuli_denovo             | 9087707                        | (T/C)       |
| 19032       | CakSNP19032    | <i>Kabuli</i>    | Ca_Kabuli_denovo             | 9089170                        | (A/C)       |
| 19033       | CakSNP19033    | <i>Kabuli</i>    | Ca_Kabuli_denovo             | 9089960                        | (G/A)       |
| 19034       | CakSNP19034    | <i>Kabuli</i>    | Ca_Kabuli_denovo             | 9093663                        | (G/A)       |
| 19035       | CakSNP19035    | <i>Kabuli</i>    | Ca_Kabuli_denovo             | 9094477                        | (C/T)       |
| 19036       | CakSNP19036    | <i>Kabuli</i>    | Ca_Kabuli_denovo             | 9096275                        | (G/A)       |
| 19037       | CakSNP19037    | <i>Kabuli</i>    | Ca_Kabuli_denovo             | 9096314                        | (A/G)       |

| <b>S.N.</b> | <b>SNP IDs</b> | <b>Cultivars</b> | <b>Chromosomes/scaffolds</b> | <b>Physical positions (bp)</b> | <b>SNPs</b> |
|-------------|----------------|------------------|------------------------------|--------------------------------|-------------|
| 19038       | CakSNP19038    | <i>Kabuli</i>    | Ca_Kabuli_denovo             | 9099899                        | (G/C)       |
| 19039       | CakSNP19039    | <i>Kabuli</i>    | Ca_Kabuli_denovo             | 9099908                        | (C/G)       |
| 19040       | CakSNP19040    | <i>Kabuli</i>    | Ca_Kabuli_denovo             | 9101826                        | (A/G)       |
| 19041       | CakSNP19041    | <i>Kabuli</i>    | Ca_Kabuli_denovo             | 9110057                        | (T/G)       |
| 19042       | CakSNP19042    | <i>Kabuli</i>    | Ca_Kabuli_denovo             | 9116771                        | (G/A)       |
| 19043       | CakSNP19043    | <i>Kabuli</i>    | Ca_Kabuli_denovo             | 9116864                        | (C/T)       |
| 19044       | CakSNP19044    | <i>Kabuli</i>    | Ca_Kabuli_denovo             | 9116876                        | (C/G)       |
| 19045       | CakSNP19045    | <i>Kabuli</i>    | Ca_Kabuli_denovo             | 9118126                        | (A/G)       |
| 19046       | CakSNP19046    | <i>Kabuli</i>    | Ca_Kabuli_denovo             | 9119868                        | (A/C)       |
| 19047       | CakSNP19047    | <i>Kabuli</i>    | Ca_Kabuli_denovo             | 9119949                        | (G/A)       |
| 19048       | CakSNP19048    | <i>Kabuli</i>    | Ca_Kabuli_denovo             | 9120924                        | (C/T)       |
| 19049       | CakSNP19049    | <i>Kabuli</i>    | Ca_Kabuli_denovo             | 9120942                        | (C/G)       |
| 19050       | CakSNP19050    | <i>Kabuli</i>    | Ca_Kabuli_denovo             | 9124892                        | (A/G)       |
| 19051       | CakSNP19051    | <i>Kabuli</i>    | Ca_Kabuli_denovo             | 9124895                        | (G/T)       |
| 19052       | CakSNP19052    | <i>Kabuli</i>    | Ca_Kabuli_denovo             | 9125565                        | (C/T)       |
| 19053       | CakSNP19053    | <i>Kabuli</i>    | Ca_Kabuli_denovo             | 9128353                        | (A/G)       |
| 19054       | CakSNP19054    | <i>Kabuli</i>    | Ca_Kabuli_denovo             | 9128371                        | (C/T)       |
| 19055       | CakSNP19055    | <i>Kabuli</i>    | Ca_Kabuli_denovo             | 9130620                        | (G/T)       |
| 19056       | CakSNP19056    | <i>Kabuli</i>    | Ca_Kabuli_denovo             | 9140141                        | (G/A)       |
| 19057       | CakSNP19057    | <i>Kabuli</i>    | Ca_Kabuli_denovo             | 9140451                        | (G/C)       |
| 19058       | CakSNP19058    | <i>Kabuli</i>    | Ca_Kabuli_denovo             | 9140463                        | (A/G)       |
| 19059       | CakSNP19059    | <i>Kabuli</i>    | Ca_Kabuli_denovo             | 9142027                        | (T/C)       |
| 19060       | CakSNP19060    | <i>Kabuli</i>    | Ca_Kabuli_denovo             | 9147040                        | (G/C)       |
| 19061       | CakSNP19061    | <i>Kabuli</i>    | Ca_Kabuli_denovo             | 9147082                        | (G/C)       |
| 19062       | CakSNP19062    | <i>Kabuli</i>    | Ca_Kabuli_denovo             | 9148606                        | (G/C)       |
| 19063       | CakSNP19063    | <i>Kabuli</i>    | Ca_Kabuli_denovo             | 9150620                        | (G/C)       |
| 19064       | CakSNP19064    | <i>Kabuli</i>    | Ca_Kabuli_denovo             | 9156588                        | (G/T)       |
| 19065       | CakSNP19065    | <i>Kabuli</i>    | Ca_Kabuli_denovo             | 9156594                        | (C/T)       |
| 19066       | CakSNP19066    | <i>Kabuli</i>    | Ca_Kabuli_denovo             | 9158920                        | (T/G)       |
| 19067       | CakSNP19067    | <i>Kabuli</i>    | Ca_Kabuli_denovo             | 9160264                        | (G/C)       |
| 19068       | CakSNP19068    | <i>Kabuli</i>    | Ca_Kabuli_denovo             | 9160267                        | (T/G)       |
| 19069       | CakSNP19069    | <i>Kabuli</i>    | Ca_Kabuli_denovo             | 9172662                        | (A/C)       |
| 19070       | CakSNP19070    | <i>Kabuli</i>    | Ca_Kabuli_denovo             | 9173737                        | (C/T)       |
| 19071       | CakSNP19071    | <i>Kabuli</i>    | Ca_Kabuli_denovo             | 9173759                        | (C/A)       |
| 19072       | CakSNP19072    | <i>Kabuli</i>    | Ca_Kabuli_denovo             | 9176774                        | (A/C)       |
| 19073       | CakSNP19073    | <i>Kabuli</i>    | Ca_Kabuli_denovo             | 9176776                        | (A/G)       |
| 19074       | CakSNP19074    | <i>Kabuli</i>    | Ca_Kabuli_denovo             | 9177251                        | (T/G)       |
| 19075       | CakSNP19075    | <i>Kabuli</i>    | Ca_Kabuli_denovo             | 9177255                        | (A/C)       |



| <b>S.N.</b> | <b>SNP IDs</b> | <b>Cultivars</b> | <b>Chromosomes/scaffolds</b> | <b>Physical positions (bp)</b> | <b>SNPs</b> |
|-------------|----------------|------------------|------------------------------|--------------------------------|-------------|
| 19076       | CakSNP19076    | <i>Kabuli</i>    | Ca_Kabuli_denovo             | 9185606                        | (A/C)       |
| 19077       | CakSNP19077    | <i>Kabuli</i>    | Ca_Kabuli_denovo             | 9185607                        | (G/C)       |
| 19078       | CakSNP19078    | <i>Kabuli</i>    | Ca_Kabuli_denovo             | 9185932                        | (C/T)       |
| 19079       | CakSNP19079    | <i>Kabuli</i>    | Ca_Kabuli_denovo             | 9187737                        | (T/G)       |
| 19080       | CakSNP19080    | <i>Kabuli</i>    | Ca_Kabuli_denovo             | 9192222                        | (G/A)       |
| 19081       | CakSNP19081    | <i>Kabuli</i>    | Ca_Kabuli_denovo             | 9192798                        | (G/A)       |
| 19082       | CakSNP19082    | <i>Kabuli</i>    | Ca_Kabuli_denovo             | 9192851                        | (T/C)       |
| 19083       | CakSNP19083    | <i>Kabuli</i>    | Ca_Kabuli_denovo             | 9198550                        | (A/G)       |
| 19084       | CakSNP19084    | <i>Kabuli</i>    | Ca_Kabuli_denovo             | 9198616                        | (C/G)       |
| 19085       | CakSNP19085    | <i>Kabuli</i>    | Ca_Kabuli_denovo             | 9201182                        | (T/C)       |
| 19086       | CakSNP19086    | <i>Kabuli</i>    | Ca_Kabuli_denovo             | 9203603                        | (T/C)       |
| 19087       | CakSNP19087    | <i>Kabuli</i>    | Ca_Kabuli_denovo             | 9205951                        | (A/G)       |
| 19088       | CakSNP19088    | <i>Kabuli</i>    | Ca_Kabuli_denovo             | 9208178                        | (C/A)       |
| 19089       | CakSNP19089    | <i>Kabuli</i>    | Ca_Kabuli_denovo             | 9208179                        | (A/G)       |
| 19090       | CakSNP19090    | <i>Kabuli</i>    | Ca_Kabuli_denovo             | 9209336                        | (T/G)       |
| 19091       | CakSNP19091    | <i>Kabuli</i>    | Ca_Kabuli_denovo             | 9214280                        | (G/C)       |
| 19092       | CakSNP19092    | <i>Kabuli</i>    | Ca_Kabuli_denovo             | 9224701                        | (A/G)       |
| 19093       | CakSNP19093    | <i>Kabuli</i>    | Ca_Kabuli_denovo             | 9224756                        | (A/G)       |
| 19094       | CakSNP19094    | <i>Kabuli</i>    | Ca_Kabuli_denovo             | 9226486                        | (T/C)       |
| 19095       | CakSNP19095    | <i>Kabuli</i>    | Ca_Kabuli_denovo             | 9239246                        | (T/C)       |
| 19096       | CakSNP19096    | <i>Kabuli</i>    | Ca_Kabuli_denovo             | 9239264                        | (A/G)       |
| 19097       | CakSNP19097    | <i>Kabuli</i>    | Ca_Kabuli_denovo             | 9239699                        | (G/A)       |
| 19098       | CakSNP19098    | <i>Kabuli</i>    | Ca_Kabuli_denovo             | 9239708                        | (G/A)       |
| 19099       | CakSNP19099    | <i>Kabuli</i>    | Ca_Kabuli_denovo             | 9248504                        | (T/C)       |
| 19100       | CakSNP19100    | <i>Kabuli</i>    | Ca_Kabuli_denovo             | 9248531                        | (C/G)       |
| 19101       | CakSNP19101    | <i>Kabuli</i>    | Ca_Kabuli_denovo             | 9250624                        | (A/G)       |
| 19102       | CakSNP19102    | <i>Kabuli</i>    | Ca_Kabuli_denovo             | 9251558                        | (C/G)       |
| 19103       | CakSNP19103    | <i>Kabuli</i>    | Ca_Kabuli_denovo             | 9252627                        | (C/T)       |
| 19104       | CakSNP19104    | <i>Kabuli</i>    | Ca_Kabuli_denovo             | 9260377                        | (A/G)       |
| 19105       | CakSNP19105    | <i>Kabuli</i>    | Ca_Kabuli_denovo             | 9275027                        | (C/T)       |
| 19106       | CakSNP19106    | <i>Kabuli</i>    | Ca_Kabuli_denovo             | 9279086                        | (G/A)       |
| 19107       | CakSNP19107    | <i>Kabuli</i>    | Ca_Kabuli_denovo             | 9279103                        | (C/G)       |
| 19108       | CakSNP19108    | <i>Kabuli</i>    | Ca_Kabuli_denovo             | 9280476                        | (G/T)       |
| 19109       | CakSNP19109    | <i>Kabuli</i>    | Ca_Kabuli_denovo             | 9285521                        | (A/G)       |
| 19110       | CakSNP19110    | <i>Kabuli</i>    | Ca_Kabuli_denovo             | 9285552                        | (A/C)       |
| 19111       | CakSNP19111    | <i>Kabuli</i>    | Ca_Kabuli_denovo             | 9290097                        | (C/T)       |
| 19112       | CakSNP19112    | <i>Kabuli</i>    | Ca_Kabuli_denovo             | 9290124                        | (T/C)       |
| 19113       | CakSNP19113    | <i>Kabuli</i>    | Ca_Kabuli_denovo             | 9291022                        | (T/C)       |

| <b>S.N.</b> | <b>SNP IDs</b> | <b>Cultivars</b> | <b>Chromosomes/scaffolds</b> | <b>Physical positions (bp)</b> | <b>SNPs</b> |
|-------------|----------------|------------------|------------------------------|--------------------------------|-------------|
| 19114       | CakSNP19114    | <i>Kabuli</i>    | Ca_Kabuli_denovo             | 9291386                        | (G/T)       |
| 19115       | CakSNP19115    | <i>Kabuli</i>    | Ca_Kabuli_denovo             | 9295107                        | (C/T)       |
| 19116       | CakSNP19116    | <i>Kabuli</i>    | Ca_Kabuli_denovo             | 9302031                        | (A/G)       |
| 19117       | CakSNP19117    | <i>Kabuli</i>    | Ca_Kabuli_denovo             | 9303206                        | (G/C)       |
| 19118       | CakSNP19118    | <i>Kabuli</i>    | Ca_Kabuli_denovo             | 9303255                        | (G/A)       |
| 19119       | CakSNP19119    | <i>Kabuli</i>    | Ca_Kabuli_denovo             | 9306274                        | (T/C)       |
| 19120       | CakSNP19120    | <i>Kabuli</i>    | Ca_Kabuli_denovo             | 9311223                        | (T/C)       |
| 19121       | CakSNP19121    | <i>Kabuli</i>    | Ca_Kabuli_denovo             | 9311232                        | (T/C)       |
| 19122       | CakSNP19122    | <i>Kabuli</i>    | Ca_Kabuli_denovo             | 9313124                        | (G/A)       |
| 19123       | CakSNP19123    | <i>Kabuli</i>    | Ca_Kabuli_denovo             | 9313760                        | (A/C)       |
| 19124       | CakSNP19124    | <i>Kabuli</i>    | Ca_Kabuli_denovo             | 9313761                        | (G/C)       |
| 19125       | CakSNP19125    | <i>Kabuli</i>    | Ca_Kabuli_denovo             | 9313763                        | (T/A)       |
| 19126       | CakSNP19126    | <i>Kabuli</i>    | Ca_Kabuli_denovo             | 9313764                        | (C/T)       |
| 19127       | CakSNP19127    | <i>Kabuli</i>    | Ca_Kabuli_denovo             | 9323010                        | (A/G)       |
| 19128       | CakSNP19128    | <i>Kabuli</i>    | Ca_Kabuli_denovo             | 9325321                        | (G/A)       |
| 19129       | CakSNP19129    | <i>Kabuli</i>    | Ca_Kabuli_denovo             | 9326340                        | (C/G)       |
| 19130       | CakSNP19130    | <i>Kabuli</i>    | Ca_Kabuli_denovo             | 9326358                        | (C/T)       |
| 19131       | CakSNP19131    | <i>Kabuli</i>    | Ca_Kabuli_denovo             | 9327287                        | (G/A)       |
| 19132       | CakSNP19132    | <i>Kabuli</i>    | Ca_Kabuli_denovo             | 9329987                        | (A/G)       |
| 19133       | CakSNP19133    | <i>Kabuli</i>    | Ca_Kabuli_denovo             | 9331268                        | (T/A)       |
| 19134       | CakSNP19134    | <i>Kabuli</i>    | Ca_Kabuli_denovo             | 9331322                        | (G/A)       |
| 19135       | CakSNP19135    | <i>Kabuli</i>    | Ca_Kabuli_denovo             | 9336282                        | (C/T)       |
| 19136       | CakSNP19136    | <i>Kabuli</i>    | Ca_Kabuli_denovo             | 9336314                        | (A/G)       |
| 19137       | CakSNP19137    | <i>Kabuli</i>    | Ca_Kabuli_denovo             | 9337079                        | (A/G)       |
| 19138       | CakSNP19138    | <i>Kabuli</i>    | Ca_Kabuli_denovo             | 9337886                        | (G/A)       |
| 19139       | CakSNP19139    | <i>Kabuli</i>    | Ca_Kabuli_denovo             | 9337907                        | (G/A)       |
| 19140       | CakSNP19140    | <i>Kabuli</i>    | Ca_Kabuli_denovo             | 9341919                        | (G/A)       |
| 19141       | CakSNP19141    | <i>Kabuli</i>    | Ca_Kabuli_denovo             | 9343441                        | (C/T)       |
| 19142       | CakSNP19142    | <i>Kabuli</i>    | Ca_Kabuli_denovo             | 9343510                        | (A/C)       |
| 19143       | CakSNP19143    | <i>Kabuli</i>    | Ca_Kabuli_denovo             | 9343631                        | (G/A)       |
| 19144       | CakSNP19144    | <i>Kabuli</i>    | Ca_Kabuli_denovo             | 9349136                        | (G/A)       |
| 19145       | CakSNP19145    | <i>Kabuli</i>    | Ca_Kabuli_denovo             | 9349164                        | (C/T)       |
| 19146       | CakSNP19146    | <i>Kabuli</i>    | Ca_Kabuli_denovo             | 9360445                        | (T/C)       |
| 19147       | CakSNP19147    | <i>Kabuli</i>    | Ca_Kabuli_denovo             | 9360845                        | (C/G)       |
| 19148       | CakSNP19148    | <i>Kabuli</i>    | Ca_Kabuli_denovo             | 9361697                        | (A/G)       |
| 19149       | CakSNP19149    | <i>Kabuli</i>    | Ca_Kabuli_denovo             | 9362542                        | (T/G)       |
| 19150       | CakSNP19150    | <i>Kabuli</i>    | Ca_Kabuli_denovo             | 9364583                        | (A/G)       |
| 19151       | CakSNP19151    | <i>Kabuli</i>    | Ca_Kabuli_denovo             | 9364589                        | (C/G)       |

| <b>S.N.</b> | <b>SNP IDs</b> | <b>Cultivars</b> | <b>Chromosomes/scaffolds</b> | <b>Physical positions (bp)</b> | <b>SNPs</b> |
|-------------|----------------|------------------|------------------------------|--------------------------------|-------------|
| 19152       | CakSNP19152    | <i>Kabuli</i>    | Ca_Kabuli_denovo             | 9370733                        | (A/C)       |
| 19153       | CakSNP19153    | <i>Kabuli</i>    | Ca_Kabuli_denovo             | 9373782                        | (A/G)       |
| 19154       | CakSNP19154    | <i>Kabuli</i>    | Ca_Kabuli_denovo             | 9378726                        | (T/C)       |
| 19155       | CakSNP19155    | <i>Kabuli</i>    | Ca_Kabuli_denovo             | 9380666                        | (A/G)       |
| 19156       | CakSNP19156    | <i>Kabuli</i>    | Ca_Kabuli_denovo             | 9380693                        | (T/C)       |
| 19157       | CakSNP19157    | <i>Kabuli</i>    | Ca_Kabuli_denovo             | 9383066                        | (T/C)       |
| 19158       | CakSNP19158    | <i>Kabuli</i>    | Ca_Kabuli_denovo             | 9386351                        | (T/C)       |
| 19159       | CakSNP19159    | <i>Kabuli</i>    | Ca_Kabuli_denovo             | 9389346                        | (C/T)       |
| 19160       | CakSNP19160    | <i>Kabuli</i>    | Ca_Kabuli_denovo             | 9393532                        | (C/T)       |
| 19161       | CakSNP19161    | <i>Kabuli</i>    | Ca_Kabuli_denovo             | 9394058                        | (G/A)       |
| 19162       | CakSNP19162    | <i>Kabuli</i>    | Ca_Kabuli_denovo             | 9395983                        | (G/T)       |
| 19163       | CakSNP19163    | <i>Kabuli</i>    | Ca_Kabuli_denovo             | 9396052                        | (G/A)       |
| 19164       | CakSNP19164    | <i>Kabuli</i>    | Ca_Kabuli_denovo             | 9396286                        | (T/C)       |
| 19165       | CakSNP19165    | <i>Kabuli</i>    | Ca_Kabuli_denovo             | 9396295                        | (T/C)       |
| 19166       | CakSNP19166    | <i>Kabuli</i>    | Ca_Kabuli_denovo             | 9397435                        | (C/T)       |
| 19167       | CakSNP19167    | <i>Kabuli</i>    | Ca_Kabuli_denovo             | 9397440                        | (T/A)       |
| 19168       | CakSNP19168    | <i>Kabuli</i>    | Ca_Kabuli_denovo             | 9404461                        | (G/A)       |
| 19169       | CakSNP19169    | <i>Kabuli</i>    | Ca_Kabuli_denovo             | 9404509                        | (T/C)       |
| 19170       | CakSNP19170    | <i>Kabuli</i>    | Ca_Kabuli_denovo             | 9410160                        | (A/G)       |
| 19171       | CakSNP19171    | <i>Kabuli</i>    | Ca_Kabuli_denovo             | 9412751                        | (G/C)       |
| 19172       | CakSNP19172    | <i>Kabuli</i>    | Ca_Kabuli_denovo             | 9412760                        | (A/G)       |
| 19173       | CakSNP19173    | <i>Kabuli</i>    | Ca_Kabuli_denovo             | 9414379                        | (T/G)       |
| 19174       | CakSNP19174    | <i>Kabuli</i>    | Ca_Kabuli_denovo             | 9415076                        | (A/G)       |
| 19175       | CakSNP19175    | <i>Kabuli</i>    | Ca_Kabuli_denovo             | 9415133                        | (G/A)       |
| 19176       | CakSNP19176    | <i>Kabuli</i>    | Ca_Kabuli_denovo             | 9418681                        | (T/A)       |
| 19177       | CakSNP19177    | <i>Kabuli</i>    | Ca_Kabuli_denovo             | 9421464                        | (A/C)       |
| 19178       | CakSNP19178    | <i>Kabuli</i>    | Ca_Kabuli_denovo             | 9421521                        | (T/C)       |
| 19179       | CakSNP19179    | <i>Kabuli</i>    | Ca_Kabuli_denovo             | 9425870                        | (T/C)       |
| 19180       | CakSNP19180    | <i>Kabuli</i>    | Ca_Kabuli_denovo             | 9429363                        | (A/C)       |
| 19181       | CakSNP19181    | <i>Kabuli</i>    | Ca_Kabuli_denovo             | 9432400                        | (T/C)       |
| 19182       | CakSNP19182    | <i>Kabuli</i>    | Ca_Kabuli_denovo             | 9434348                        | (T/C)       |
| 19183       | CakSNP19183    | <i>Kabuli</i>    | Ca_Kabuli_denovo             | 9434372                        | (T/G)       |
| 19184       | CakSNP19184    | <i>Kabuli</i>    | Ca_Kabuli_denovo             | 9435488                        | (T/G)       |
| 19185       | CakSNP19185    | <i>Kabuli</i>    | Ca_Kabuli_denovo             | 9437375                        | (A/G)       |
| 19186       | CakSNP19186    | <i>Kabuli</i>    | Ca_Kabuli_denovo             | 9437396                        | (C/G)       |
| 19187       | CakSNP19187    | <i>Kabuli</i>    | Ca_Kabuli_denovo             | 9437960                        | (C/T)       |
| 19188       | CakSNP19188    | <i>Kabuli</i>    | Ca_Kabuli_denovo             | 9437977                        | (A/G)       |
| 19189       | CakSNP19189    | <i>Kabuli</i>    | Ca_Kabuli_denovo             | 9438865                        | (G/C)       |

| <b>S.N.</b> | <b>SNP IDs</b> | <b>Cultivars</b> | <b>Chromosomes/scaffolds</b> | <b>Physical positions (bp)</b> | <b>SNPs</b> |
|-------------|----------------|------------------|------------------------------|--------------------------------|-------------|
| 19190       | CakSNP19190    | <i>Kabuli</i>    | Ca_Kabuli_denovo             | 9442353                        | (G/C)       |
| 19191       | CakSNP19191    | <i>Kabuli</i>    | Ca_Kabuli_denovo             | 9442362                        | (A/G)       |
| 19192       | CakSNP19192    | <i>Kabuli</i>    | Ca_Kabuli_denovo             | 9444085                        | (T/C)       |
| 19193       | CakSNP19193    | <i>Kabuli</i>    | Ca_Kabuli_denovo             | 9448354                        | (G/T)       |
| 19194       | CakSNP19194    | <i>Kabuli</i>    | Ca_Kabuli_denovo             | 9452904                        | (G/A)       |
| 19195       | CakSNP19195    | <i>Kabuli</i>    | Ca_Kabuli_denovo             | 9456475                        | (T/C)       |
| 19196       | CakSNP19196    | <i>Kabuli</i>    | Ca_Kabuli_denovo             | 9456505                        | (T/G)       |
| 19197       | CakSNP19197    | <i>Kabuli</i>    | Ca_Kabuli_denovo             | 9457401                        | (G/C)       |
| 19198       | CakSNP19198    | <i>Kabuli</i>    | Ca_Kabuli_denovo             | 9462647                        | (A/G)       |
| 19199       | CakSNP19199    | <i>Kabuli</i>    | Ca_Kabuli_denovo             | 9462650                        | (C/G)       |
| 19200       | CakSNP19200    | <i>Kabuli</i>    | Ca_Kabuli_denovo             | 9469427                        | (G/C)       |
| 19201       | CakSNP19201    | <i>Kabuli</i>    | Ca_Kabuli_denovo             | 9475012                        | (A/G)       |
| 19202       | CakSNP19202    | <i>Kabuli</i>    | Ca_Kabuli_denovo             | 9479197                        | (G/C)       |
| 19203       | CakSNP19203    | <i>Kabuli</i>    | Ca_Kabuli_denovo             | 9479611                        | (A/T)       |
| 19204       | CakSNP19204    | <i>Kabuli</i>    | Ca_Kabuli_denovo             | 9482483                        | (T/C)       |
| 19205       | CakSNP19205    | <i>Kabuli</i>    | Ca_Kabuli_denovo             | 9493569                        | (T/G)       |
| 19206       | CakSNP19206    | <i>Kabuli</i>    | Ca_Kabuli_denovo             | 9493584                        | (T/G)       |
| 19207       | CakSNP19207    | <i>Kabuli</i>    | Ca_Kabuli_denovo             | 9495891                        | (C/G)       |
| 19208       | CakSNP19208    | <i>Kabuli</i>    | Ca_Kabuli_denovo             | 9495933                        | (T/G)       |
| 19209       | CakSNP19209    | <i>Kabuli</i>    | Ca_Kabuli_denovo             | 9501269                        | (T/C)       |
| 19210       | CakSNP19210    | <i>Kabuli</i>    | Ca_Kabuli_denovo             | 9503039                        | (G/T)       |
| 19211       | CakSNP19211    | <i>Kabuli</i>    | Ca_Kabuli_denovo             | 9510912                        | (A/G)       |
| 19212       | CakSNP19212    | <i>Kabuli</i>    | Ca_Kabuli_denovo             | 9511963                        | (C/T)       |
| 19213       | CakSNP19213    | <i>Kabuli</i>    | Ca_Kabuli_denovo             | 9511976                        | (G/A)       |
| 19214       | CakSNP19214    | <i>Kabuli</i>    | Ca_Kabuli_denovo             | 9513069                        | (C/T)       |
| 19215       | CakSNP19215    | <i>Kabuli</i>    | Ca_Kabuli_denovo             | 9513373                        | (T/C)       |
| 19216       | CakSNP19216    | <i>Kabuli</i>    | Ca_Kabuli_denovo             | 9513845                        | (G/A)       |
| 19217       | CakSNP19217    | <i>Kabuli</i>    | Ca_Kabuli_denovo             | 9518015                        | (G/A)       |
| 19218       | CakSNP19218    | <i>Kabuli</i>    | Ca_Kabuli_denovo             | 9519581                        | (C/T)       |
| 19219       | CakSNP19219    | <i>Kabuli</i>    | Ca_Kabuli_denovo             | 9519617                        | (C/T)       |
| 19220       | CakSNP19220    | <i>Kabuli</i>    | Ca_Kabuli_denovo             | 9519815                        | (A/G)       |
| 19221       | CakSNP19221    | <i>Kabuli</i>    | Ca_Kabuli_denovo             | 9519824                        | (A/G)       |
| 19222       | CakSNP19222    | <i>Kabuli</i>    | Ca_Kabuli_denovo             | 9522876                        | (C/G)       |
| 19223       | CakSNP19223    | <i>Kabuli</i>    | Ca_Kabuli_denovo             | 9523870                        | (C/G)       |
| 19224       | CakSNP19224    | <i>Kabuli</i>    | Ca_Kabuli_denovo             | 9523885                        | (C/T)       |
| 19225       | CakSNP19225    | <i>Kabuli</i>    | Ca_Kabuli_denovo             | 9523894                        | (C/A)       |
| 19226       | CakSNP19226    | <i>Kabuli</i>    | Ca_Kabuli_denovo             | 9524048                        | (A/G)       |
| 19227       | CakSNP19227    | <i>Kabuli</i>    | Ca_Kabuli_denovo             | 9527559                        | (T/A)       |

| <b>S.N.</b> | <b>SNP IDs</b> | <b>Cultivars</b> | <b>Chromosomes/scaffolds</b> | <b>Physical positions (bp)</b> | <b>SNPs</b> |
|-------------|----------------|------------------|------------------------------|--------------------------------|-------------|
| 19228       | CakSNP19228    | <i>Kabuli</i>    | Ca_Kabuli_denovo             | 9533107                        | (C/T)       |
| 19229       | CakSNP19229    | <i>Kabuli</i>    | Ca_Kabuli_denovo             | 9533143                        | (C/T)       |
| 19230       | CakSNP19230    | <i>Kabuli</i>    | Ca_Kabuli_denovo             | 9533629                        | (G/A)       |
| 19231       | CakSNP19231    | <i>Kabuli</i>    | Ca_Kabuli_denovo             | 9533635                        | (A/G)       |
| 19232       | CakSNP19232    | <i>Kabuli</i>    | Ca_Kabuli_denovo             | 9533903                        | (G/C)       |
| 19233       | CakSNP19233    | <i>Kabuli</i>    | Ca_Kabuli_denovo             | 9533953                        | (G/T)       |
| 19234       | CakSNP19234    | <i>Kabuli</i>    | Ca_Kabuli_denovo             | 9535405                        | (A/C)       |
| 19235       | CakSNP19235    | <i>Kabuli</i>    | Ca_Kabuli_denovo             | 9535430                        | (A/C)       |
| 19236       | CakSNP19236    | <i>Kabuli</i>    | Ca_Kabuli_denovo             | 9545146                        | (T/G)       |
| 19237       | CakSNP19237    | <i>Kabuli</i>    | Ca_Kabuli_denovo             | 9545486                        | (A/T)       |
| 19238       | CakSNP19238    | <i>Kabuli</i>    | Ca_Kabuli_denovo             | 9551035                        | (G/C)       |
| 19239       | CakSNP19239    | <i>Kabuli</i>    | Ca_Kabuli_denovo             | 9554120                        | (A/G)       |
| 19240       | CakSNP19240    | <i>Kabuli</i>    | Ca_Kabuli_denovo             | 9555017                        | (C/T)       |
| 19241       | CakSNP19241    | <i>Kabuli</i>    | Ca_Kabuli_denovo             | 9555080                        | (T/C)       |
| 19242       | CakSNP19242    | <i>Kabuli</i>    | Ca_Kabuli_denovo             | 9565532                        | (C/T)       |
| 19243       | CakSNP19243    | <i>Kabuli</i>    | Ca_Kabuli_denovo             | 9565561                        | (T/G)       |
| 19244       | CakSNP19244    | <i>Kabuli</i>    | Ca_Kabuli_denovo             | 9573858                        | (T/C)       |
| 19245       | CakSNP19245    | <i>Kabuli</i>    | Ca_Kabuli_denovo             | 9585179                        | (T/C)       |
| 19246       | CakSNP19246    | <i>Kabuli</i>    | Ca_Kabuli_denovo             | 9586184                        | (G/C)       |
| 19247       | CakSNP19247    | <i>Kabuli</i>    | Ca_Kabuli_denovo             | 9595407                        | (C/G)       |
| 19248       | CakSNP19248    | <i>Kabuli</i>    | Ca_Kabuli_denovo             | 9595430                        | (C/T)       |
| 19249       | CakSNP19249    | <i>Kabuli</i>    | Ca_Kabuli_denovo             | 9595612                        | (T/G)       |
| 19250       | CakSNP19250    | <i>Kabuli</i>    | Ca_Kabuli_denovo             | 9595624                        | (C/G)       |
| 19251       | CakSNP19251    | <i>Kabuli</i>    | Ca_Kabuli_denovo             | 9602675                        | (T/C)       |
| 19252       | CakSNP19252    | <i>Kabuli</i>    | Ca_Kabuli_denovo             | 9607619                        | (G/A)       |
| 19253       | CakSNP19253    | <i>Kabuli</i>    | Ca_Kabuli_denovo             | 9608629                        | (C/T)       |
| 19254       | CakSNP19254    | <i>Kabuli</i>    | Ca_Kabuli_denovo             | 9611662                        | (C/T)       |
| 19255       | CakSNP19255    | <i>Kabuli</i>    | Ca_Kabuli_denovo             | 9611695                        | (A/C)       |
| 19256       | CakSNP19256    | <i>Kabuli</i>    | Ca_Kabuli_denovo             | 9612481                        | (C/T)       |
| 19257       | CakSNP19257    | <i>Kabuli</i>    | Ca_Kabuli_denovo             | 9615028                        | (G/T)       |
| 19258       | CakSNP19258    | <i>Kabuli</i>    | Ca_Kabuli_denovo             | 9619205                        | (G/A)       |
| 19259       | CakSNP19259    | <i>Kabuli</i>    | Ca_Kabuli_denovo             | 9622636                        | (A/C)       |
| 19260       | CakSNP19260    | <i>Kabuli</i>    | Ca_Kabuli_denovo             | 9624793                        | (T/C)       |
| 19261       | CakSNP19261    | <i>Kabuli</i>    | Ca_Kabuli_denovo             | 9626464                        | (G/A)       |
| 19262       | CakSNP19262    | <i>Kabuli</i>    | Ca_Kabuli_denovo             | 9626469                        | (G/A)       |
| 19263       | CakSNP19263    | <i>Kabuli</i>    | Ca_Kabuli_denovo             | 9626640                        | (G/T)       |
| 19264       | CakSNP19264    | <i>Kabuli</i>    | Ca_Kabuli_denovo             | 9626684                        | (C/G)       |
| 19265       | CakSNP19265    | <i>Kabuli</i>    | Ca_Kabuli_denovo             | 9627699                        | (T/C)       |

| <b>S.N.</b> | <b>SNP IDs</b> | <b>Cultivars</b> | <b>Chromosomes/scaffolds</b> | <b>Physical positions (bp)</b> | <b>SNPs</b> |
|-------------|----------------|------------------|------------------------------|--------------------------------|-------------|
| 19266       | CakSNP19266    | <i>Kabuli</i>    | Ca_Kabuli_denovo             | 9628193                        | (A/G)       |
| 19267       | CakSNP19267    | <i>Kabuli</i>    | Ca_Kabuli_denovo             | 9628195                        | (T/G)       |
| 19268       | CakSNP19268    | <i>Kabuli</i>    | Ca_Kabuli_denovo             | 9633018                        | (A/C)       |
| 19269       | CakSNP19269    | <i>Kabuli</i>    | Ca_Kabuli_denovo             | 9633019                        | (G/A)       |
| 19270       | CakSNP19270    | <i>Kabuli</i>    | Ca_Kabuli_denovo             | 9634980                        | (C/G)       |
| 19271       | CakSNP19271    | <i>Kabuli</i>    | Ca_Kabuli_denovo             | 9634986                        | (C/T)       |
| 19272       | CakSNP19272    | <i>Kabuli</i>    | Ca_Kabuli_denovo             | 9635479                        | (G/A)       |
| 19273       | CakSNP19273    | <i>Kabuli</i>    | Ca_Kabuli_denovo             | 9639661                        | (A/G)       |
| 19274       | CakSNP19274    | <i>Kabuli</i>    | Ca_Kabuli_denovo             | 9639705                        | (C/A)       |
| 19275       | CakSNP19275    | <i>Kabuli</i>    | Ca_Kabuli_denovo             | 9648137                        | (G/A)       |
| 19276       | CakSNP19276    | <i>Kabuli</i>    | Ca_Kabuli_denovo             | 9650779                        | (A/G)       |
| 19277       | CakSNP19277    | <i>Kabuli</i>    | Ca_Kabuli_denovo             | 9653500                        | (G/A)       |
| 19278       | CakSNP19278    | <i>Kabuli</i>    | Ca_Kabuli_denovo             | 9653548                        | (G/T)       |
| 19279       | CakSNP19279    | <i>Kabuli</i>    | Ca_Kabuli_denovo             | 9655416                        | (G/C)       |
| 19280       | CakSNP19280    | <i>Kabuli</i>    | Ca_Kabuli_denovo             | 9655928                        | (C/G)       |
| 19281       | CakSNP19281    | <i>Kabuli</i>    | Ca_Kabuli_denovo             | 9658278                        | (G/A)       |
| 19282       | CakSNP19282    | <i>Kabuli</i>    | Ca_Kabuli_denovo             | 9660064                        | (C/G)       |
| 19283       | CakSNP19283    | <i>Kabuli</i>    | Ca_Kabuli_denovo             | 9661613                        | (G/C)       |
| 19284       | CakSNP19284    | <i>Kabuli</i>    | Ca_Kabuli_denovo             | 9664866                        | (C/T)       |
| 19285       | CakSNP19285    | <i>Kabuli</i>    | Ca_Kabuli_denovo             | 9664901                        | (G/C)       |
| 19286       | CakSNP19286    | <i>Kabuli</i>    | Ca_Kabuli_denovo             | 9668776                        | (G/T)       |
| 19287       | CakSNP19287    | <i>Kabuli</i>    | Ca_Kabuli_denovo             | 9672444                        | (T/C)       |
| 19288       | CakSNP19288    | <i>Kabuli</i>    | Ca_Kabuli_denovo             | 9672812                        | (G/A)       |
| 19289       | CakSNP19289    | <i>Kabuli</i>    | Ca_Kabuli_denovo             | 9678908                        | (A/G)       |
| 19290       | CakSNP19290    | <i>Kabuli</i>    | Ca_Kabuli_denovo             | 9678917                        | (C/T)       |
| 19291       | CakSNP19291    | <i>Kabuli</i>    | Ca_Kabuli_denovo             | 9679714                        | (T/G)       |
| 19292       | CakSNP19292    | <i>Kabuli</i>    | Ca_Kabuli_denovo             | 9681415                        | (G/C)       |
| 19293       | CakSNP19293    | <i>Kabuli</i>    | Ca_Kabuli_denovo             | 9685223                        | (G/C)       |
| 19294       | CakSNP19294    | <i>Kabuli</i>    | Ca_Kabuli_denovo             | 9689620                        | (A/G)       |
| 19295       | CakSNP19295    | <i>Kabuli</i>    | Ca_Kabuli_denovo             | 9689670                        | (A/G)       |
| 19296       | CakSNP19296    | <i>Kabuli</i>    | Ca_Kabuli_denovo             | 9699577                        | (C/T)       |
| 19297       | CakSNP19297    | <i>Kabuli</i>    | Ca_Kabuli_denovo             | 9702980                        | (T/C)       |
| 19298       | CakSNP19298    | <i>Kabuli</i>    | Ca_Kabuli_denovo             | 9702994                        | (T/C)       |
| 19299       | CakSNP19299    | <i>Kabuli</i>    | Ca_Kabuli_denovo             | 9718247                        | (G/A)       |
| 19300       | CakSNP19300    | <i>Kabuli</i>    | Ca_Kabuli_denovo             | 9718330                        | (C/A)       |
| 19301       | CakSNP19301    | <i>Kabuli</i>    | Ca_Kabuli_denovo             | 9718375                        | (C/T)       |
| 19302       | CakSNP19302    | <i>Kabuli</i>    | Ca_Kabuli_denovo             | 9719868                        | (T/C)       |
| 19303       | CakSNP19303    | <i>Kabuli</i>    | Ca_Kabuli_denovo             | 9720016                        | (T/C)       |

| <b>S.N.</b> | <b>SNP IDs</b> | <b>Cultivars</b> | <b>Chromosomes/scaffolds</b> | <b>Physical positions (bp)</b> | <b>SNPs</b> |
|-------------|----------------|------------------|------------------------------|--------------------------------|-------------|
| 19304       | CakSNP19304    | <i>Kabuli</i>    | Ca_Kabuli_denovo             | 9720034                        | (A/G)       |
| 19305       | CakSNP19305    | <i>Kabuli</i>    | Ca_Kabuli_denovo             | 9725329                        | (A/C)       |
| 19306       | CakSNP19306    | <i>Kabuli</i>    | Ca_Kabuli_denovo             | 9726829                        | (G/T)       |
| 19307       | CakSNP19307    | <i>Kabuli</i>    | Ca_Kabuli_denovo             | 9726834                        | (T/C)       |
| 19308       | CakSNP19308    | <i>Kabuli</i>    | Ca_Kabuli_denovo             | 9730519                        | (A/G)       |
| 19309       | CakSNP19309    | <i>Kabuli</i>    | Ca_Kabuli_denovo             | 9730534                        | (C/A)       |
| 19310       | CakSNP19310    | <i>Kabuli</i>    | Ca_Kabuli_denovo             | 9737591                        | (A/G)       |
| 19311       | CakSNP19311    | <i>Kabuli</i>    | Ca_Kabuli_denovo             | 9738624                        | (A/C)       |
| 19312       | CakSNP19312    | <i>Kabuli</i>    | Ca_Kabuli_denovo             | 9738660                        | (G/A)       |
| 19313       | CakSNP19313    | <i>Kabuli</i>    | Ca_Kabuli_denovo             | 9739260                        | (A/C)       |
| 19314       | CakSNP19314    | <i>Kabuli</i>    | Ca_Kabuli_denovo             | 9739831                        | (G/A)       |
| 19315       | CakSNP19315    | <i>Kabuli</i>    | Ca_Kabuli_denovo             | 9741292                        | (C/A)       |
| 19316       | CakSNP19316    | <i>Kabuli</i>    | Ca_Kabuli_denovo             | 9751264                        | (G/C)       |
| 19317       | CakSNP19317    | <i>Kabuli</i>    | Ca_Kabuli_denovo             | 9751267                        | (C/T)       |
| 19318       | CakSNP19318    | <i>Kabuli</i>    | Ca_Kabuli_denovo             | 9751700                        | (A/C)       |
| 19319       | CakSNP19319    | <i>Kabuli</i>    | Ca_Kabuli_denovo             | 9751701                        | (G/A)       |
| 19320       | CakSNP19320    | <i>Kabuli</i>    | Ca_Kabuli_denovo             | 9758471                        | (C/T)       |
| 19321       | CakSNP19321    | <i>Kabuli</i>    | Ca_Kabuli_denovo             | 9765484                        | (C/G)       |
| 19322       | CakSNP19322    | <i>Kabuli</i>    | Ca_Kabuli_denovo             | 9765523                        | (T/C)       |
| 19323       | CakSNP19323    | <i>Kabuli</i>    | Ca_Kabuli_denovo             | 9766654                        | (C/T)       |
| 19324       | CakSNP19324    | <i>Kabuli</i>    | Ca_Kabuli_denovo             | 9780824                        | (T/C)       |
| 19325       | CakSNP19325    | <i>Kabuli</i>    | Ca_Kabuli_denovo             | 9780872                        | (T/C)       |
| 19326       | CakSNP19326    | <i>Kabuli</i>    | Ca_Kabuli_denovo             | 9781196                        | (C/T)       |
| 19327       | CakSNP19327    | <i>Kabuli</i>    | Ca_Kabuli_denovo             | 9781236                        | (A/G)       |
| 19328       | CakSNP19328    | <i>Kabuli</i>    | Ca_Kabuli_denovo             | 9783341                        | (A/G)       |
| 19329       | CakSNP19329    | <i>Kabuli</i>    | Ca_Kabuli_denovo             | 9786959                        | (G/C)       |
| 19330       | CakSNP19330    | <i>Kabuli</i>    | Ca_Kabuli_denovo             | 9788350                        | (G/A)       |
| 19331       | CakSNP19331    | <i>Kabuli</i>    | Ca_Kabuli_denovo             | 9788437                        | (T/C)       |
| 19332       | CakSNP19332    | <i>Kabuli</i>    | Ca_Kabuli_denovo             | 9793854                        | (C/G)       |
| 19333       | CakSNP19333    | <i>Kabuli</i>    | Ca_Kabuli_denovo             | 9802771                        | (T/G)       |
| 19334       | CakSNP19334    | <i>Kabuli</i>    | Ca_Kabuli_denovo             | 9804090                        | (G/A)       |
| 19335       | CakSNP19335    | <i>Kabuli</i>    | Ca_Kabuli_denovo             | 9804109                        | (C/T)       |
| 19336       | CakSNP19336    | <i>Kabuli</i>    | Ca_Kabuli_denovo             | 9804576                        | (G/A)       |
| 19337       | CakSNP19337    | <i>Kabuli</i>    | Ca_Kabuli_denovo             | 9809489                        | (T/C)       |
| 19338       | CakSNP19338    | <i>Kabuli</i>    | Ca_Kabuli_denovo             | 9809493                        | (T/C)       |
| 19339       | CakSNP19339    | <i>Kabuli</i>    | Ca_Kabuli_denovo             | 9815146                        | (G/T)       |
| 19340       | CakSNP19340    | <i>Kabuli</i>    | Ca_Kabuli_denovo             | 9815151                        | (A/T)       |
| 19341       | CakSNP19341    | <i>Kabuli</i>    | Ca_Kabuli_denovo             | 9823378                        | (C/G)       |

| <b>S.N.</b> | <b>SNP IDs</b> | <b>Cultivars</b> | <b>Chromosomes/scaffolds</b> | <b>Physical positions (bp)</b> | <b>SNPs</b> |
|-------------|----------------|------------------|------------------------------|--------------------------------|-------------|
| 19342       | CakSNP19342    | <i>Kabuli</i>    | Ca_Kabuli_denovo             | 9830944                        | (C/T)       |
| 19343       | CakSNP19343    | <i>Kabuli</i>    | Ca_Kabuli_denovo             | 9830977                        | (T/C)       |
| 19344       | CakSNP19344    | <i>Kabuli</i>    | Ca_Kabuli_denovo             | 9832549                        | (G/A)       |
| 19345       | CakSNP19345    | <i>Kabuli</i>    | Ca_Kabuli_denovo             | 9833972                        | (G/A)       |
| 19346       | CakSNP19346    | <i>Kabuli</i>    | Ca_Kabuli_denovo             | 9836572                        | (G/T)       |
| 19347       | CakSNP19347    | <i>Kabuli</i>    | Ca_Kabuli_denovo             | 9845280                        | (A/C)       |
| 19348       | CakSNP19348    | <i>Kabuli</i>    | Ca_Kabuli_denovo             | 9845868                        | (T/C)       |
| 19349       | CakSNP19349    | <i>Kabuli</i>    | Ca_Kabuli_denovo             | 9847577                        | (C/A)       |
| 19350       | CakSNP19350    | <i>Kabuli</i>    | Ca_Kabuli_denovo             | 9847585                        | (G/A)       |
| 19351       | CakSNP19351    | <i>Kabuli</i>    | Ca_Kabuli_denovo             | 9848680                        | (G/C)       |
| 19352       | CakSNP19352    | <i>Kabuli</i>    | Ca_Kabuli_denovo             | 9850046                        | (A/G)       |
| 19353       | CakSNP19353    | <i>Kabuli</i>    | Ca_Kabuli_denovo             | 9853101                        | (A/C)       |
| 19354       | CakSNP19354    | <i>Kabuli</i>    | Ca_Kabuli_denovo             | 9863140                        | (A/G)       |
| 19355       | CakSNP19355    | <i>Kabuli</i>    | Ca_Kabuli_denovo             | 9863513                        | (T/C)       |
| 19356       | CakSNP19356    | <i>Kabuli</i>    | Ca_Kabuli_denovo             | 9863525                        | (G/C)       |
| 19357       | CakSNP19357    | <i>Kabuli</i>    | Ca_Kabuli_denovo             | 9865957                        | (C/T)       |
| 19358       | CakSNP19358    | <i>Kabuli</i>    | Ca_Kabuli_denovo             | 9870575                        | (T/C)       |
| 19359       | CakSNP19359    | <i>Kabuli</i>    | Ca_Kabuli_denovo             | 9872528                        | (T/G)       |
| 19360       | CakSNP19360    | <i>Kabuli</i>    | Ca_Kabuli_denovo             | 9872591                        | (C/G)       |
| 19361       | CakSNP19361    | <i>Kabuli</i>    | Ca_Kabuli_denovo             | 9878441                        | (A/G)       |
| 19362       | CakSNP19362    | <i>Kabuli</i>    | Ca_Kabuli_denovo             | 9880795                        | (C/G)       |
| 19363       | CakSNP19363    | <i>Kabuli</i>    | Ca_Kabuli_denovo             | 9881788                        | (G/T)       |
| 19364       | CakSNP19364    | <i>Kabuli</i>    | Ca_Kabuli_denovo             | 9881800                        | (A/G)       |
| 19365       | CakSNP19365    | <i>Kabuli</i>    | Ca_Kabuli_denovo             | 9884524                        | (T/G)       |
| 19366       | CakSNP19366    | <i>Kabuli</i>    | Ca_Kabuli_denovo             | 9885838                        | (G/C)       |
| 19367       | CakSNP19367    | <i>Kabuli</i>    | Ca_Kabuli_denovo             | 9889813                        | (T/C)       |
| 19368       | CakSNP19368    | <i>Kabuli</i>    | Ca_Kabuli_denovo             | 9891114                        | (G/T)       |
| 19369       | CakSNP19369    | <i>Kabuli</i>    | Ca_Kabuli_denovo             | 9891158                        | (T/C)       |
| 19370       | CakSNP19370    | <i>Kabuli</i>    | Ca_Kabuli_denovo             | 9891452                        | (A/G)       |
| 19371       | CakSNP19371    | <i>Kabuli</i>    | Ca_Kabuli_denovo             | 9896914                        | (G/A)       |
| 19372       | CakSNP19372    | <i>Kabuli</i>    | Ca_Kabuli_denovo             | 9896968                        | (G/A)       |
| 19373       | CakSNP19373    | <i>Kabuli</i>    | Ca_Kabuli_denovo             | 9899452                        | (C/G)       |
| 19374       | CakSNP19374    | <i>Kabuli</i>    | Ca_Kabuli_denovo             | 9901759                        | (C/T)       |
| 19375       | CakSNP19375    | <i>Kabuli</i>    | Ca_Kabuli_denovo             | 9901779                        | (G/C)       |
| 19376       | CakSNP19376    | <i>Kabuli</i>    | Ca_Kabuli_denovo             | 9908975                        | (T/C)       |
| 19377       | CakSNP19377    | <i>Kabuli</i>    | Ca_Kabuli_denovo             | 9913858                        | (G/T)       |
| 19378       | CakSNP19378    | <i>Kabuli</i>    | Ca_Kabuli_denovo             | 9913864                        | (G/A)       |
| 19379       | CakSNP19379    | <i>Kabuli</i>    | Ca_Kabuli_denovo             | 9914830                        | (G/T)       |



| <b>S.N.</b> | <b>SNP IDs</b> | <b>Cultivars</b> | <b>Chromosomes/scaffolds</b> | <b>Physical positions (bp)</b> | <b>SNPs</b> |
|-------------|----------------|------------------|------------------------------|--------------------------------|-------------|
| 19380       | CakSNP19380    | <i>Kabuli</i>    | Ca_Kabuli_denovo             | 9915716                        | (C/G)       |
| 19381       | CakSNP19381    | <i>Kabuli</i>    | Ca_Kabuli_denovo             | 9915762                        | (T/G)       |
| 19382       | CakSNP19382    | <i>Kabuli</i>    | Ca_Kabuli_denovo             | 9915772                        | (C/G)       |
| 19383       | CakSNP19383    | <i>Kabuli</i>    | Ca_Kabuli_denovo             | 9918090                        | (C/A)       |
| 19384       | CakSNP19384    | <i>Kabuli</i>    | Ca_Kabuli_denovo             | 9918838                        | (C/G)       |
| 19385       | CakSNP19385    | <i>Kabuli</i>    | Ca_Kabuli_denovo             | 9918841                        | (A/G)       |
| 19386       | CakSNP19386    | <i>Kabuli</i>    | Ca_Kabuli_denovo             | 9918853                        | (C/T)       |
| 19387       | CakSNP19387    | <i>Kabuli</i>    | Ca_Kabuli_denovo             | 9923995                        | (C/T)       |
| 19388       | CakSNP19388    | <i>Kabuli</i>    | Ca_Kabuli_denovo             | 9924598                        | (C/T)       |
| 19389       | CakSNP19389    | <i>Kabuli</i>    | Ca_Kabuli_denovo             | 9924640                        | (T/A)       |
| 19390       | CakSNP19390    | <i>Kabuli</i>    | Ca_Kabuli_denovo             | 9924819                        | (G/T)       |
| 19391       | CakSNP19391    | <i>Kabuli</i>    | Ca_Kabuli_denovo             | 9924862                        | (G/A)       |
| 19392       | CakSNP19392    | <i>Kabuli</i>    | Ca_Kabuli_denovo             | 9929093                        | (C/T)       |
| 19393       | CakSNP19393    | <i>Kabuli</i>    | Ca_Kabuli_denovo             | 9932690                        | (G/A)       |
| 19394       | CakSNP19394    | <i>Kabuli</i>    | Ca_Kabuli_denovo             | 9932696                        | (G/C)       |
| 19395       | CakSNP19395    | <i>Kabuli</i>    | Ca_Kabuli_denovo             | 9933865                        | (G/C)       |
| 19396       | CakSNP19396    | <i>Kabuli</i>    | Ca_Kabuli_denovo             | 9933889                        | (A/G)       |
| 19397       | CakSNP19397    | <i>Kabuli</i>    | Ca_Kabuli_denovo             | 9937838                        | (T/C)       |
| 19398       | CakSNP19398    | <i>Kabuli</i>    | Ca_Kabuli_denovo             | 9938641                        | (A/G)       |
| 19399       | CakSNP19399    | <i>Kabuli</i>    | Ca_Kabuli_denovo             | 9938665                        | (G/C)       |
| 19400       | CakSNP19400    | <i>Kabuli</i>    | Ca_Kabuli_denovo             | 9940609                        | (C/T)       |
| 19401       | CakSNP19401    | <i>Kabuli</i>    | Ca_Kabuli_denovo             | 9942826                        | (T/C)       |
| 19402       | CakSNP19402    | <i>Kabuli</i>    | Ca_Kabuli_denovo             | 9942846                        | (A/G)       |
| 19403       | CakSNP19403    | <i>Kabuli</i>    | Ca_Kabuli_denovo             | 9947560                        | (A/C)       |
| 19404       | CakSNP19404    | <i>Kabuli</i>    | Ca_Kabuli_denovo             | 9951000                        | (A/G)       |
| 19405       | CakSNP19405    | <i>Kabuli</i>    | Ca_Kabuli_denovo             | 9962011                        | (G/A)       |
| 19406       | CakSNP19406    | <i>Kabuli</i>    | Ca_Kabuli_denovo             | 9962035                        | (C/T)       |
| 19407       | CakSNP19407    | <i>Kabuli</i>    | Ca_Kabuli_denovo             | 9973611                        | (G/T)       |
| 19408       | CakSNP19408    | <i>Kabuli</i>    | Ca_Kabuli_denovo             | 9973617                        | (T/C)       |
| 19409       | CakSNP19409    | <i>Kabuli</i>    | Ca_Kabuli_denovo             | 9973620                        | (A/G)       |
| 19410       | CakSNP19410    | <i>Kabuli</i>    | Ca_Kabuli_denovo             | 9974899                        | (G/A)       |
| 19411       | CakSNP19411    | <i>Kabuli</i>    | Ca_Kabuli_denovo             | 9976962                        | (T/C)       |
| 19412       | CakSNP19412    | <i>Kabuli</i>    | Ca_Kabuli_denovo             | 9976966                        | (A/G)       |
| 19413       | CakSNP19413    | <i>Kabuli</i>    | Ca_Kabuli_denovo             | 9981376                        | (A/C)       |
| 19414       | CakSNP19414    | <i>Kabuli</i>    | Ca_Kabuli_denovo             | 9981406                        | (G/T)       |
| 19415       | CakSNP19415    | <i>Kabuli</i>    | Ca_Kabuli_denovo             | 9985529                        | (C/G)       |
| 19416       | CakSNP19416    | <i>Kabuli</i>    | Ca_Kabuli_denovo             | 9985544                        | (C/G)       |
| 19417       | CakSNP19417    | <i>Kabuli</i>    | Ca_Kabuli_denovo             | 9996966                        | (G/A)       |

| <b>S.N.</b> | <b>SNP IDs</b> | <b>Cultivars</b> | <b>Chromosomes/scaffolds</b> | <b>Physical positions (bp)</b> | <b>SNPs</b> |
|-------------|----------------|------------------|------------------------------|--------------------------------|-------------|
| 19418       | CakSNP19418    | <i>Kabuli</i>    | Ca_Kabuli_denovo             | 9996979                        | (G/T)       |
| 19419       | CakSNP19419    | <i>Kabuli</i>    | Ca_Kabuli_denovo             | 10003680                       | (G/T)       |
| 19420       | CakSNP19420    | <i>Kabuli</i>    | Ca_Kabuli_denovo             | 10008824                       | (T/C)       |
| 19421       | CakSNP19421    | <i>Kabuli</i>    | Ca_Kabuli_denovo             | 10009526                       | (T/C)       |
| 19422       | CakSNP19422    | <i>Kabuli</i>    | Ca_Kabuli_denovo             | 10012784                       | (A/G)       |
| 19423       | CakSNP19423    | <i>Kabuli</i>    | Ca_Kabuli_denovo             | 10012811                       | (G/C)       |
| 19424       | CakSNP19424    | <i>Kabuli</i>    | Ca_Kabuli_denovo             | 10013047                       | (C/T)       |
| 19425       | CakSNP19425    | <i>Kabuli</i>    | Ca_Kabuli_denovo             | 10013311                       | (A/C)       |
| 19426       | CakSNP19426    | <i>Kabuli</i>    | Ca_Kabuli_denovo             | 10013608                       | (T/C)       |
| 19427       | CakSNP19427    | <i>Kabuli</i>    | Ca_Kabuli_denovo             | 10013617                       | (T/G)       |
| 19428       | CakSNP19428    | <i>Kabuli</i>    | Ca_Kabuli_denovo             | 10015026                       | (C/G)       |
| 19429       | CakSNP19429    | <i>Kabuli</i>    | Ca_Kabuli_denovo             | 10015729                       | (T/G)       |
| 19430       | CakSNP19430    | <i>Kabuli</i>    | Ca_Kabuli_denovo             | 10016049                       | (C/A)       |
| 19431       | CakSNP19431    | <i>Kabuli</i>    | Ca_Kabuli_denovo             | 10019860                       | (A/G)       |
| 19432       | CakSNP19432    | <i>Kabuli</i>    | Ca_Kabuli_denovo             | 10019905                       | (A/G)       |
| 19433       | CakSNP19433    | <i>Kabuli</i>    | Ca_Kabuli_denovo             | 10022721                       | (T/C)       |
| 19434       | CakSNP19434    | <i>Kabuli</i>    | Ca_Kabuli_denovo             | 10022740                       | (C/A)       |
| 19435       | CakSNP19435    | <i>Kabuli</i>    | Ca_Kabuli_denovo             | 10032574                       | (T/C)       |
| 19436       | CakSNP19436    | <i>Kabuli</i>    | Ca_Kabuli_denovo             | 10032577                       | (T/G)       |
| 19437       | CakSNP19437    | <i>Kabuli</i>    | Ca_Kabuli_denovo             | 10039375                       | (C/G)       |
| 19438       | CakSNP19438    | <i>Kabuli</i>    | Ca_Kabuli_denovo             | 10039400                       | (C/T)       |
| 19439       | CakSNP19439    | <i>Kabuli</i>    | Ca_Kabuli_denovo             | 10040960                       | (T/C)       |
| 19440       | CakSNP19440    | <i>Kabuli</i>    | Ca_Kabuli_denovo             | 10041262                       | (T/G)       |
| 19441       | CakSNP19441    | <i>Kabuli</i>    | Ca_Kabuli_denovo             | 10043768                       | (T/C)       |
| 19442       | CakSNP19442    | <i>Kabuli</i>    | Ca_Kabuli_denovo             | 10045315                       | (A/G)       |
| 19443       | CakSNP19443    | <i>Kabuli</i>    | Ca_Kabuli_denovo             | 10045339                       | (C/G)       |
| 19444       | CakSNP19444    | <i>Kabuli</i>    | Ca_Kabuli_denovo             | 10061400                       | (T/C)       |
| 19445       | CakSNP19445    | <i>Kabuli</i>    | Ca_Kabuli_denovo             | 10061401                       | (T/C)       |
| 19446       | CakSNP19446    | <i>Kabuli</i>    | Ca_Kabuli_denovo             | 10061405                       | (C/G)       |
| 19447       | CakSNP19447    | <i>Kabuli</i>    | Ca_Kabuli_denovo             | 10068192                       | (T/C)       |
| 19448       | CakSNP19448    | <i>Kabuli</i>    | Ca_Kabuli_denovo             | 10070360                       | (G/C)       |
| 19449       | CakSNP19449    | <i>Kabuli</i>    | Ca_Kabuli_denovo             | 10077413                       | (C/T)       |
| 19450       | CakSNP19450    | <i>Kabuli</i>    | Ca_Kabuli_denovo             | 10077418                       | (C/T)       |
| 19451       | CakSNP19451    | <i>Kabuli</i>    | Ca_Kabuli_denovo             | 10078621                       | (C/T)       |
| 19452       | CakSNP19452    | <i>Kabuli</i>    | Ca_Kabuli_denovo             | 10084025                       | (T/C)       |
| 19453       | CakSNP19453    | <i>Kabuli</i>    | Ca_Kabuli_denovo             | 10086513                       | (A/G)       |
| 19454       | CakSNP19454    | <i>Kabuli</i>    | Ca_Kabuli_denovo             | 10086534                       | (C/T)       |
| 19455       | CakSNP19455    | <i>Kabuli</i>    | Ca_Kabuli_denovo             | 10088290                       | (T/C)       |

| <b>S.N.</b> | <b>SNP IDs</b> | <b>Cultivars</b> | <b>Chromosomes/scaffolds</b> | <b>Physical positions (bp)</b> | <b>SNPs</b> |
|-------------|----------------|------------------|------------------------------|--------------------------------|-------------|
| 19456       | CakSNP19456    | <i>Kabuli</i>    | Ca_Kabuli_denovo             | 10090741                       | (G/C)       |
| 19457       | CakSNP19457    | <i>Kabuli</i>    | Ca_Kabuli_denovo             | 10090793                       | (G/A)       |
| 19458       | CakSNP19458    | <i>Kabuli</i>    | Ca_Kabuli_denovo             | 10091452                       | (G/C)       |
| 19459       | CakSNP19459    | <i>Kabuli</i>    | Ca_Kabuli_denovo             | 10091458                       | (C/T)       |
| 19460       | CakSNP19460    | <i>Kabuli</i>    | Ca_Kabuli_denovo             | 10093966                       | (A/G)       |
| 19461       | CakSNP19461    | <i>Kabuli</i>    | Ca_Kabuli_denovo             | 10093969                       | (C/A)       |
| 19462       | CakSNP19462    | <i>Kabuli</i>    | Ca_Kabuli_denovo             | 10096801                       | (A/G)       |
| 19463       | CakSNP19463    | <i>Kabuli</i>    | Ca_Kabuli_denovo             | 10096810                       | (C/T)       |
| 19464       | CakSNP19464    | <i>Kabuli</i>    | Ca_Kabuli_denovo             | 10097986                       | (T/C)       |
| 19465       | CakSNP19465    | <i>Kabuli</i>    | Ca_Kabuli_denovo             | 10101482                       | (C/T)       |
| 19466       | CakSNP19466    | <i>Kabuli</i>    | Ca_Kabuli_denovo             | 10101496                       | (C/T)       |
| 19467       | CakSNP19467    | <i>Kabuli</i>    | Ca_Kabuli_denovo             | 10103354                       | (T/G)       |
| 19468       | CakSNP19468    | <i>Kabuli</i>    | Ca_Kabuli_denovo             | 10103399                       | (A/C)       |
| 19469       | CakSNP19469    | <i>Kabuli</i>    | Ca_Kabuli_denovo             | 10104830                       | (C/T)       |
| 19470       | CakSNP19470    | <i>Kabuli</i>    | Ca_Kabuli_denovo             | 10104864                       | (G/A)       |
| 19471       | CakSNP19471    | <i>Kabuli</i>    | Ca_Kabuli_denovo             | 10109044                       | (C/G)       |
| 19472       | CakSNP19472    | <i>Kabuli</i>    | Ca_Kabuli_denovo             | 10112518                       | (A/C)       |
| 19473       | CakSNP19473    | <i>Kabuli</i>    | Ca_Kabuli_denovo             | 10112928                       | (A/C)       |
| 19474       | CakSNP19474    | <i>Kabuli</i>    | Ca_Kabuli_denovo             | 10112950                       | (G/C)       |
| 19475       | CakSNP19475    | <i>Kabuli</i>    | Ca_Kabuli_denovo             | 10117322                       | (C/T)       |
| 19476       | CakSNP19476    | <i>Kabuli</i>    | Ca_Kabuli_denovo             | 10117331                       | (T/G)       |
| 19477       | CakSNP19477    | <i>Kabuli</i>    | Ca_Kabuli_denovo             | 10124748                       | (A/G)       |
| 19478       | CakSNP19478    | <i>Kabuli</i>    | Ca_Kabuli_denovo             | 10124801                       | (G/A)       |
| 19479       | CakSNP19479    | <i>Kabuli</i>    | Ca_Kabuli_denovo             | 10129566                       | (G/C)       |
| 19480       | CakSNP19480    | <i>Kabuli</i>    | Ca_Kabuli_denovo             | 10129575                       | (T/C)       |
| 19481       | CakSNP19481    | <i>Kabuli</i>    | Ca_Kabuli_denovo             | 10137026                       | (C/G)       |
| 19482       | CakSNP19482    | <i>Kabuli</i>    | Ca_Kabuli_denovo             | 10137050                       | (T/C)       |
| 19483       | CakSNP19483    | <i>Kabuli</i>    | Ca_Kabuli_denovo             | 10138779                       | (A/C)       |
| 19484       | CakSNP19484    | <i>Kabuli</i>    | Ca_Kabuli_denovo             | 10141306                       | (G/T)       |
| 19485       | CakSNP19485    | <i>Kabuli</i>    | Ca_Kabuli_denovo             | 10141307                       | (T/C)       |
| 19486       | CakSNP19486    | <i>Kabuli</i>    | Ca_Kabuli_denovo             | 10141954                       | (A/G)       |
| 19487       | CakSNP19487    | <i>Kabuli</i>    | Ca_Kabuli_denovo             | 10142443                       | (C/T)       |
| 19488       | CakSNP19488    | <i>Kabuli</i>    | Ca_Kabuli_denovo             | 10145154                       | (A/G)       |
| 19489       | CakSNP19489    | <i>Kabuli</i>    | Ca_Kabuli_denovo             | 10149666                       | (T/C)       |
| 19490       | CakSNP19490    | <i>Kabuli</i>    | Ca_Kabuli_denovo             | 10149781                       | (G/A)       |
| 19491       | CakSNP19491    | <i>Kabuli</i>    | Ca_Kabuli_denovo             | 10149790                       | (A/G)       |
| 19492       | CakSNP19492    | <i>Kabuli</i>    | Ca_Kabuli_denovo             | 10149841                       | (T/C)       |
| 19493       | CakSNP19493    | <i>Kabuli</i>    | Ca_Kabuli_denovo             | 10149869                       | (A/C)       |

| <b>S.N.</b> | <b>SNP IDs</b> | <b>Cultivars</b> | <b>Chromosomes/scaffolds</b> | <b>Physical positions (bp)</b> | <b>SNPs</b> |
|-------------|----------------|------------------|------------------------------|--------------------------------|-------------|
| 19494       | CakSNP19494    | <i>Kabuli</i>    | Ca_Kabuli_denovo             | 10156177                       | (T/C)       |
| 19495       | CakSNP19495    | <i>Kabuli</i>    | Ca_Kabuli_denovo             | 10156216                       | (G/C)       |
| 19496       | CakSNP19496    | <i>Kabuli</i>    | Ca_Kabuli_denovo             | 10168295                       | (G/A)       |
| 19497       | CakSNP19497    | <i>Kabuli</i>    | Ca_Kabuli_denovo             | 10168335                       | (A/G)       |
| 19498       | CakSNP19498    | <i>Kabuli</i>    | Ca_Kabuli_denovo             | 10169966                       | (G/A)       |
| 19499       | CakSNP19499    | <i>Kabuli</i>    | Ca_Kabuli_denovo             | 10169996                       | (A/G)       |
| 19500       | CakSNP19500    | <i>Kabuli</i>    | Ca_Kabuli_denovo             | 10171792                       | (A/C)       |
| 19501       | CakSNP19501    | <i>Kabuli</i>    | Ca_Kabuli_denovo             | 10171816                       | (A/G)       |
| 19502       | CakSNP19502    | <i>Kabuli</i>    | Ca_Kabuli_denovo             | 10175611                       | (A/C)       |
| 19503       | CakSNP19503    | <i>Kabuli</i>    | Ca_Kabuli_denovo             | 10177607                       | (A/G)       |
| 19504       | CakSNP19504    | <i>Kabuli</i>    | Ca_Kabuli_denovo             | 10177613                       | (T/C)       |
| 19505       | CakSNP19505    | <i>Kabuli</i>    | Ca_Kabuli_denovo             | 10178789                       | (G/C)       |
| 19506       | CakSNP19506    | <i>Kabuli</i>    | Ca_Kabuli_denovo             | 10178804                       | (C/T)       |
| 19507       | CakSNP19507    | <i>Kabuli</i>    | Ca_Kabuli_denovo             | 10190673                       | (A/G)       |
| 19508       | CakSNP19508    | <i>Kabuli</i>    | Ca_Kabuli_denovo             | 10194406                       | (C/T)       |
| 19509       | CakSNP19509    | <i>Kabuli</i>    | Ca_Kabuli_denovo             | 10194475                       | (A/G)       |
| 19510       | CakSNP19510    | <i>Kabuli</i>    | Ca_Kabuli_denovo             | 10205609                       | (G/A)       |
| 19511       | CakSNP19511    | <i>Kabuli</i>    | Ca_Kabuli_denovo             | 10210572                       | (G/T)       |
| 19512       | CakSNP19512    | <i>Kabuli</i>    | Ca_Kabuli_denovo             | 10213833                       | (A/C)       |
| 19513       | CakSNP19513    | <i>Kabuli</i>    | Ca_Kabuli_denovo             | 10217093                       | (C/G)       |
| 19514       | CakSNP19514    | <i>Kabuli</i>    | Ca_Kabuli_denovo             | 10217104                       | (A/C)       |
| 19515       | CakSNP19515    | <i>Kabuli</i>    | Ca_Kabuli_denovo             | 10225142                       | (C/T)       |
| 19516       | CakSNP19516    | <i>Kabuli</i>    | Ca_Kabuli_denovo             | 10225149                       | (G/A)       |
| 19517       | CakSNP19517    | <i>Kabuli</i>    | Ca_Kabuli_denovo             | 10228761                       | (A/G)       |
| 19518       | CakSNP19518    | <i>Kabuli</i>    | Ca_Kabuli_denovo             | 10228762                       | (G/A)       |
| 19519       | CakSNP19519    | <i>Kabuli</i>    | Ca_Kabuli_denovo             | 10230849                       | (G/T)       |
| 19520       | CakSNP19520    | <i>Kabuli</i>    | Ca_Kabuli_denovo             | 10230851                       | (T/C)       |
| 19521       | CakSNP19521    | <i>Kabuli</i>    | Ca_Kabuli_denovo             | 10236737                       | (C/T)       |
| 19522       | CakSNP19522    | <i>Kabuli</i>    | Ca_Kabuli_denovo             | 10254467                       | (C/T)       |
| 19523       | CakSNP19523    | <i>Kabuli</i>    | Ca_Kabuli_denovo             | 10255898                       | (A/G)       |
| 19524       | CakSNP19524    | <i>Kabuli</i>    | Ca_Kabuli_denovo             | 10256594                       | (C/G)       |
| 19525       | CakSNP19525    | <i>Kabuli</i>    | Ca_Kabuli_denovo             | 10257196                       | (A/G)       |
| 19526       | CakSNP19526    | <i>Kabuli</i>    | Ca_Kabuli_denovo             | 10261646                       | (T/C)       |
| 19527       | CakSNP19527    | <i>Kabuli</i>    | Ca_Kabuli_denovo             | 10261700                       | (G/C)       |
| 19528       | CakSNP19528    | <i>Kabuli</i>    | Ca_Kabuli_denovo             | 10262876                       | (C/T)       |
| 19529       | CakSNP19529    | <i>Kabuli</i>    | Ca_Kabuli_denovo             | 10263678                       | (A/G)       |
| 19530       | CakSNP19530    | <i>Kabuli</i>    | Ca_Kabuli_denovo             | 10265917                       | (C/T)       |
| 19531       | CakSNP19531    | <i>Kabuli</i>    | Ca_Kabuli_denovo             | 10265974                       | (C/A)       |

| <b>S.N.</b> | <b>SNP IDs</b> | <b>Cultivars</b> | <b>Chromosomes/scaffolds</b> | <b>Physical positions (bp)</b> | <b>SNPs</b> |
|-------------|----------------|------------------|------------------------------|--------------------------------|-------------|
| 19532       | CakSNP19532    | <i>Kabuli</i>    | Ca_Kabuli_denovo             | 10269550                       | (C/T)       |
| 19533       | CakSNP19533    | <i>Kabuli</i>    | Ca_Kabuli_denovo             | 10269607                       | (T/G)       |
| 19534       | CakSNP19534    | <i>Kabuli</i>    | Ca_Kabuli_denovo             | 10274756                       | (G/T)       |
| 19535       | CakSNP19535    | <i>Kabuli</i>    | Ca_Kabuli_denovo             | 10274772                       | (T/C)       |
| 19536       | CakSNP19536    | <i>Kabuli</i>    | Ca_Kabuli_denovo             | 10279030                       | (C/T)       |
| 19537       | CakSNP19537    | <i>Kabuli</i>    | Ca_Kabuli_denovo             | 10280444                       | (A/G)       |
| 19538       | CakSNP19538    | <i>Kabuli</i>    | Ca_Kabuli_denovo             | 10286367                       | (T/C)       |
| 19539       | CakSNP19539    | <i>Kabuli</i>    | Ca_Kabuli_denovo             | 10288899                       | (T/A)       |
| 19540       | CakSNP19540    | <i>Kabuli</i>    | Ca_Kabuli_denovo             | 10288969                       | (C/T)       |
| 19541       | CakSNP19541    | <i>Kabuli</i>    | Ca_Kabuli_denovo             | 10290935                       | (A/G)       |
| 19542       | CakSNP19542    | <i>Kabuli</i>    | Ca_Kabuli_denovo             | 10291504                       | (G/A)       |
| 19543       | CakSNP19543    | <i>Kabuli</i>    | Ca_Kabuli_denovo             | 10291534                       | (C/T)       |
| 19544       | CakSNP19544    | <i>Kabuli</i>    | Ca_Kabuli_denovo             | 10292621                       | (T/C)       |
| 19545       | CakSNP19545    | <i>Kabuli</i>    | Ca_Kabuli_denovo             | 10300039                       | (G/A)       |
| 19546       | CakSNP19546    | <i>Kabuli</i>    | Ca_Kabuli_denovo             | 10309223                       | (C/G)       |
| 19547       | CakSNP19547    | <i>Kabuli</i>    | Ca_Kabuli_denovo             | 10313066                       | (G/A)       |
| 19548       | CakSNP19548    | <i>Kabuli</i>    | Ca_Kabuli_denovo             | 10313087                       | (A/G)       |
| 19549       | CakSNP19549    | <i>Kabuli</i>    | Ca_Kabuli_denovo             | 10313600                       | (T/C)       |
| 19550       | CakSNP19550    | <i>Kabuli</i>    | Ca_Kabuli_denovo             | 10320550                       | (G/C)       |
| 19551       | CakSNP19551    | <i>Kabuli</i>    | Ca_Kabuli_denovo             | 10320553                       | (C/T)       |
| 19552       | CakSNP19552    | <i>Kabuli</i>    | Ca_Kabuli_denovo             | 10321987                       | (T/A)       |
| 19553       | CakSNP19553    | <i>Kabuli</i>    | Ca_Kabuli_denovo             | 10322002                       | (T/C)       |
| 19554       | CakSNP19554    | <i>Kabuli</i>    | Ca_Kabuli_denovo             | 10324130                       | (C/G)       |
| 19555       | CakSNP19555    | <i>Kabuli</i>    | Ca_Kabuli_denovo             | 10324205                       | (G/C)       |
| 19556       | CakSNP19556    | <i>Kabuli</i>    | Ca_Kabuli_denovo             | 10328878                       | (T/C)       |
| 19557       | CakSNP19557    | <i>Kabuli</i>    | Ca_Kabuli_denovo             | 10329076                       | (C/T)       |
| 19558       | CakSNP19558    | <i>Kabuli</i>    | Ca_Kabuli_denovo             | 10332868                       | (G/A)       |
| 19559       | CakSNP19559    | <i>Kabuli</i>    | Ca_Kabuli_denovo             | 10336212                       | (C/T)       |
| 19560       | CakSNP19560    | <i>Kabuli</i>    | Ca_Kabuli_denovo             | 10336214                       | (C/T)       |
| 19561       | CakSNP19561    | <i>Kabuli</i>    | Ca_Kabuli_denovo             | 10336794                       | (G/C)       |
| 19562       | CakSNP19562    | <i>Kabuli</i>    | Ca_Kabuli_denovo             | 10339873                       | (C/T)       |
| 19563       | CakSNP19563    | <i>Kabuli</i>    | Ca_Kabuli_denovo             | 10340283                       | (T/C)       |
| 19564       | CakSNP19564    | <i>Kabuli</i>    | Ca_Kabuli_denovo             | 10349134                       | (G/T)       |
| 19565       | CakSNP19565    | <i>Kabuli</i>    | Ca_Kabuli_denovo             | 10352881                       | (A/C)       |
| 19566       | CakSNP19566    | <i>Kabuli</i>    | Ca_Kabuli_denovo             | 10352883                       | (A/G)       |
| 19567       | CakSNP19567    | <i>Kabuli</i>    | Ca_Kabuli_denovo             | 10359340                       | (T/G)       |
| 19568       | CakSNP19568    | <i>Kabuli</i>    | Ca_Kabuli_denovo             | 10362271                       | (C/T)       |
| 19569       | CakSNP19569    | <i>Kabuli</i>    | Ca_Kabuli_denovo             | 10362307                       | (A/C)       |

| <b>S.N.</b> | <b>SNP IDs</b> | <b>Cultivars</b> | <b>Chromosomes/scaffolds</b> | <b>Physical positions (bp)</b> | <b>SNPs</b> |
|-------------|----------------|------------------|------------------------------|--------------------------------|-------------|
| 19570       | CakSNP19570    | <i>Kabuli</i>    | Ca_Kabuli_denovo             | 10371987                       | (T/G)       |
| 19571       | CakSNP19571    | <i>Kabuli</i>    | Ca_Kabuli_denovo             | 10382340                       | (G/C)       |
| 19572       | CakSNP19572    | <i>Kabuli</i>    | Ca_Kabuli_denovo             | 10382402                       | (T/C)       |
| 19573       | CakSNP19573    | <i>Kabuli</i>    | Ca_Kabuli_denovo             | 10386409                       | (C/T)       |
| 19574       | CakSNP19574    | <i>Kabuli</i>    | Ca_Kabuli_denovo             | 10387229                       | (G/A)       |
| 19575       | CakSNP19575    | <i>Kabuli</i>    | Ca_Kabuli_denovo             | 10388512                       | (A/G)       |
| 19576       | CakSNP19576    | <i>Kabuli</i>    | Ca_Kabuli_denovo             | 10389471                       | (G/A)       |
| 19577       | CakSNP19577    | <i>Kabuli</i>    | Ca_Kabuli_denovo             | 10397284                       | (C/T)       |
| 19578       | CakSNP19578    | <i>Kabuli</i>    | Ca_Kabuli_denovo             | 10397306                       | (C/G)       |
| 19579       | CakSNP19579    | <i>Kabuli</i>    | Ca_Kabuli_denovo             | 10398136                       | (C/T)       |
| 19580       | CakSNP19580    | <i>Kabuli</i>    | Ca_Kabuli_denovo             | 10400788                       | (G/C)       |
| 19581       | CakSNP19581    | <i>Kabuli</i>    | Ca_Kabuli_denovo             | 10404768                       | (A/G)       |
| 19582       | CakSNP19582    | <i>Kabuli</i>    | Ca_Kabuli_denovo             | 10404818                       | (G/A)       |
| 19583       | CakSNP19583    | <i>Kabuli</i>    | Ca_Kabuli_denovo             | 10407328                       | (C/G)       |
| 19584       | CakSNP19584    | <i>Kabuli</i>    | Ca_Kabuli_denovo             | 10413612                       | (A/G)       |
| 19585       | CakSNP19585    | <i>Kabuli</i>    | Ca_Kabuli_denovo             | 10415506                       | (T/C)       |
| 19586       | CakSNP19586    | <i>Kabuli</i>    | Ca_Kabuli_denovo             | 10417123                       | (G/C)       |
| 19587       | CakSNP19587    | <i>Kabuli</i>    | Ca_Kabuli_denovo             | 10417126                       | (A/G)       |
| 19588       | CakSNP19588    | <i>Kabuli</i>    | Ca_Kabuli_denovo             | 10420396                       | (C/T)       |
| 19589       | CakSNP19589    | <i>Kabuli</i>    | Ca_Kabuli_denovo             | 10420453                       | (T/G)       |
| 19590       | CakSNP19590    | <i>Kabuli</i>    | Ca_Kabuli_denovo             | 10421757                       | (G/A)       |
| 19591       | CakSNP19591    | <i>Kabuli</i>    | Ca_Kabuli_denovo             | 10421896                       | (C/A)       |
| 19592       | CakSNP19592    | <i>Kabuli</i>    | Ca_Kabuli_denovo             | 10423550                       | (C/T)       |
| 19593       | CakSNP19593    | <i>Kabuli</i>    | Ca_Kabuli_denovo             | 10423580                       | (T/C)       |
| 19594       | CakSNP19594    | <i>Kabuli</i>    | Ca_Kabuli_denovo             | 10426889                       | (T/C)       |
| 19595       | CakSNP19595    | <i>Kabuli</i>    | Ca_Kabuli_denovo             | 10426931                       | (G/A)       |
| 19596       | CakSNP19596    | <i>Kabuli</i>    | Ca_Kabuli_denovo             | 10427834                       | (G/C)       |
| 19597       | CakSNP19597    | <i>Kabuli</i>    | Ca_Kabuli_denovo             | 10427835                       | (C/T)       |
| 19598       | CakSNP19598    | <i>Kabuli</i>    | Ca_Kabuli_denovo             | 10427855                       | (T/C)       |
| 19599       | CakSNP19599    | <i>Kabuli</i>    | Ca_Kabuli_denovo             | 10428671                       | (G/A)       |
| 19600       | CakSNP19600    | <i>Kabuli</i>    | Ca_Kabuli_denovo             | 10428677                       | (G/T)       |
| 19601       | CakSNP19601    | <i>Kabuli</i>    | Ca_Kabuli_denovo             | 10433563                       | (T/G)       |
| 19602       | CakSNP19602    | <i>Kabuli</i>    | Ca_Kabuli_denovo             | 10434056                       | (G/A)       |
| 19603       | CakSNP19603    | <i>Kabuli</i>    | Ca_Kabuli_denovo             | 10434071                       | (G/T)       |
| 19604       | CakSNP19604    | <i>Kabuli</i>    | Ca_Kabuli_denovo             | 10434715                       | (T/C)       |
| 19605       | CakSNP19605    | <i>Kabuli</i>    | Ca_Kabuli_denovo             | 10438263                       | (A/C)       |
| 19606       | CakSNP19606    | <i>Kabuli</i>    | Ca_Kabuli_denovo             | 10438309                       | (A/C)       |
| 19607       | CakSNP19607    | <i>Kabuli</i>    | Ca_Kabuli_denovo             | 10449585                       | (A/T)       |

| <b>S.N.</b> | <b>SNP IDs</b> | <b>Cultivars</b> | <b>Chromosomes/scaffolds</b> | <b>Physical positions (bp)</b> | <b>SNPs</b> |
|-------------|----------------|------------------|------------------------------|--------------------------------|-------------|
| 19608       | CakSNP19608    | <i>Kabuli</i>    | Ca_Kabuli_denovo             | 10453372                       | (G/A)       |
| 19609       | CakSNP19609    | <i>Kabuli</i>    | Ca_Kabuli_denovo             | 10457782                       | (A/G)       |
| 19610       | CakSNP19610    | <i>Kabuli</i>    | Ca_Kabuli_denovo             | 10462185                       | (T/G)       |
| 19611       | CakSNP19611    | <i>Kabuli</i>    | Ca_Kabuli_denovo             | 10463932                       | (A/G)       |
| 19612       | CakSNP19612    | <i>Kabuli</i>    | Ca_Kabuli_denovo             | 10466745                       | (C/T)       |
| 19613       | CakSNP19613    | <i>Kabuli</i>    | Ca_Kabuli_denovo             | 10466768                       | (C/T)       |
| 19614       | CakSNP19614    | <i>Kabuli</i>    | Ca_Kabuli_denovo             | 10471964                       | (A/G)       |
| 19615       | CakSNP19615    | <i>Kabuli</i>    | Ca_Kabuli_denovo             | 10474267                       | (A/C)       |
| 19616       | CakSNP19616    | <i>Kabuli</i>    | Ca_Kabuli_denovo             | 10474993                       | (G/A)       |
| 19617       | CakSNP19617    | <i>Kabuli</i>    | Ca_Kabuli_denovo             | 10475020                       | (C/G)       |
| 19618       | CakSNP19618    | <i>Kabuli</i>    | Ca_Kabuli_denovo             | 10476143                       | (A/C)       |
| 19619       | CakSNP19619    | <i>Kabuli</i>    | Ca_Kabuli_denovo             | 10478166                       | (G/A)       |
| 19620       | CakSNP19620    | <i>Kabuli</i>    | Ca_Kabuli_denovo             | 10478171                       | (C/T)       |
| 19621       | CakSNP19621    | <i>Kabuli</i>    | Ca_Kabuli_denovo             | 10480186                       | (G/A)       |
| 19622       | CakSNP19622    | <i>Kabuli</i>    | Ca_Kabuli_denovo             | 10480247                       | (G/A)       |
| 19623       | CakSNP19623    | <i>Kabuli</i>    | Ca_Kabuli_denovo             | 10480562                       | (A/G)       |
| 19624       | CakSNP19624    | <i>Kabuli</i>    | Ca_Kabuli_denovo             | 10487489                       | (C/T)       |
| 19625       | CakSNP19625    | <i>Kabuli</i>    | Ca_Kabuli_denovo             | 10487501                       | (C/T)       |
| 19626       | CakSNP19626    | <i>Kabuli</i>    | Ca_Kabuli_denovo             | 10487719                       | (C/A)       |
| 19627       | CakSNP19627    | <i>Kabuli</i>    | Ca_Kabuli_denovo             | 10488191                       | (G/A)       |
| 19628       | CakSNP19628    | <i>Kabuli</i>    | Ca_Kabuli_denovo             | 10488218                       | (T/C)       |
| 19629       | CakSNP19629    | <i>Kabuli</i>    | Ca_Kabuli_denovo             | 10490833                       | (T/G)       |
| 19630       | CakSNP19630    | <i>Kabuli</i>    | Ca_Kabuli_denovo             | 10490857                       | (C/T)       |
| 19631       | CakSNP19631    | <i>Kabuli</i>    | Ca_Kabuli_denovo             | 10491343                       | (G/A)       |
| 19632       | CakSNP19632    | <i>Kabuli</i>    | Ca_Kabuli_denovo             | 10491421                       | (A/C)       |
| 19633       | CakSNP19633    | <i>Kabuli</i>    | Ca_Kabuli_denovo             | 10504586                       | (T/A)       |
| 19634       | CakSNP19634    | <i>Kabuli</i>    | Ca_Kabuli_denovo             | 10509436                       | (C/T)       |
| 19635       | CakSNP19635    | <i>Kabuli</i>    | Ca_Kabuli_denovo             | 10520172                       | (A/G)       |
| 19636       | CakSNP19636    | <i>Kabuli</i>    | Ca_Kabuli_denovo             | 10521045                       | (C/T)       |
| 19637       | CakSNP19637    | <i>Kabuli</i>    | Ca_Kabuli_denovo             | 10522423                       | (C/T)       |
| 19638       | CakSNP19638    | <i>Kabuli</i>    | Ca_Kabuli_denovo             | 10526136                       | (T/C)       |
| 19639       | CakSNP19639    | <i>Kabuli</i>    | Ca_Kabuli_denovo             | 10526145                       | (C/T)       |
| 19640       | CakSNP19640    | <i>Kabuli</i>    | Ca_Kabuli_denovo             | 10527066                       | (C/A)       |
| 19641       | CakSNP19641    | <i>Kabuli</i>    | Ca_Kabuli_denovo             | 10528013                       | (A/G)       |
| 19642       | CakSNP19642    | <i>Kabuli</i>    | Ca_Kabuli_denovo             | 10538248                       | (G/A)       |
| 19643       | CakSNP19643    | <i>Kabuli</i>    | Ca_Kabuli_denovo             | 10544632                       | (A/G)       |
| 19644       | CakSNP19644    | <i>Kabuli</i>    | Ca_Kabuli_denovo             | 10546885                       | (A/G)       |
| 19645       | CakSNP19645    | <i>Kabuli</i>    | Ca_Kabuli_denovo             | 10555780                       | (C/A)       |

| <b>S.N.</b> | <b>SNP IDs</b> | <b>Cultivars</b> | <b>Chromosomes/scaffolds</b> | <b>Physical positions (bp)</b> | <b>SNPs</b> |
|-------------|----------------|------------------|------------------------------|--------------------------------|-------------|
| 19646       | CakSNP19646    | <i>Kabuli</i>    | Ca_Kabuli_denovo             | 10558499                       | (C/T)       |
| 19647       | CakSNP19647    | <i>Kabuli</i>    | Ca_Kabuli_denovo             | 10558812                       | (T/C)       |
| 19648       | CakSNP19648    | <i>Kabuli</i>    | Ca_Kabuli_denovo             | 10559975                       | (A/G)       |
| 19649       | CakSNP19649    | <i>Kabuli</i>    | Ca_Kabuli_denovo             | 10563440                       | (G/A)       |
| 19650       | CakSNP19650    | <i>Kabuli</i>    | Ca_Kabuli_denovo             | 10566203                       | (C/G)       |
| 19651       | CakSNP19651    | <i>Kabuli</i>    | Ca_Kabuli_denovo             | 10580621                       | (G/A)       |
| 19652       | CakSNP19652    | <i>Kabuli</i>    | Ca_Kabuli_denovo             | 10583596                       | (G/A)       |
| 19653       | CakSNP19653    | <i>Kabuli</i>    | Ca_Kabuli_denovo             | 10586396                       | (G/A)       |
| 19654       | CakSNP19654    | <i>Kabuli</i>    | Ca_Kabuli_denovo             | 10586476                       | (A/G)       |
| 19655       | CakSNP19655    | <i>Kabuli</i>    | Ca_Kabuli_denovo             | 10587347                       | (T/C)       |
| 19656       | CakSNP19656    | <i>Kabuli</i>    | Ca_Kabuli_denovo             | 10587505                       | (C/G)       |
| 19657       | CakSNP19657    | <i>Kabuli</i>    | Ca_Kabuli_denovo             | 10597388                       | (C/G)       |
| 19658       | CakSNP19658    | <i>Kabuli</i>    | Ca_Kabuli_denovo             | 10597948                       | (T/C)       |
| 19659       | CakSNP19659    | <i>Kabuli</i>    | Ca_Kabuli_denovo             | 10601860                       | (C/T)       |
| 19660       | CakSNP19660    | <i>Kabuli</i>    | Ca_Kabuli_denovo             | 10602584                       | (A/G)       |
| 19661       | CakSNP19661    | <i>Kabuli</i>    | Ca_Kabuli_denovo             | 10604019                       | (C/T)       |
| 19662       | CakSNP19662    | <i>Kabuli</i>    | Ca_Kabuli_denovo             | 10608370                       | (C/T)       |
| 19663       | CakSNP19663    | <i>Kabuli</i>    | Ca_Kabuli_denovo             | 10609543                       | (G/A)       |
| 19664       | CakSNP19664    | <i>Kabuli</i>    | Ca_Kabuli_denovo             | 10612490                       | (G/A)       |
| 19665       | CakSNP19665    | <i>Kabuli</i>    | Ca_Kabuli_denovo             | 10613546                       | (T/G)       |
| 19666       | CakSNP19666    | <i>Kabuli</i>    | Ca_Kabuli_denovo             | 10614294                       | (C/T)       |
| 19667       | CakSNP19667    | <i>Kabuli</i>    | Ca_Kabuli_denovo             | 10614905                       | (G/A)       |
| 19668       | CakSNP19668    | <i>Kabuli</i>    | Ca_Kabuli_denovo             | 10619587                       | (G/A)       |
| 19669       | CakSNP19669    | <i>Kabuli</i>    | Ca_Kabuli_denovo             | 10623248                       | (A/G)       |
| 19670       | CakSNP19670    | <i>Kabuli</i>    | Ca_Kabuli_denovo             | 10625948                       | (C/A)       |
| 19671       | CakSNP19671    | <i>Kabuli</i>    | Ca_Kabuli_denovo             | 10625976                       | (A/T)       |
| 19672       | CakSNP19672    | <i>Kabuli</i>    | Ca_Kabuli_denovo             | 10633747                       | (C/T)       |
| 19673       | CakSNP19673    | <i>Kabuli</i>    | Ca_Kabuli_denovo             | 10634473                       | (A/G)       |
| 19674       | CakSNP19674    | <i>Kabuli</i>    | Ca_Kabuli_denovo             | 10634539                       | (C/G)       |
| 19675       | CakSNP19675    | <i>Kabuli</i>    | Ca_Kabuli_denovo             | 10635906                       | (G/A)       |
| 19676       | CakSNP19676    | <i>Kabuli</i>    | Ca_Kabuli_denovo             | 10636722                       | (T/G)       |
| 19677       | CakSNP19677    | <i>Kabuli</i>    | Ca_Kabuli_denovo             | 10636753                       | (T/C)       |
| 19678       | CakSNP19678    | <i>Kabuli</i>    | Ca_Kabuli_denovo             | 10638379                       | (C/T)       |
| 19679       | CakSNP19679    | <i>Kabuli</i>    | Ca_Kabuli_denovo             | 10638416                       | (C/T)       |
| 19680       | CakSNP19680    | <i>Kabuli</i>    | Ca_Kabuli_denovo             | 10639123                       | (T/C)       |
| 19681       | CakSNP19681    | <i>Kabuli</i>    | Ca_Kabuli_denovo             | 10639199                       | (A/C)       |
| 19682       | CakSNP19682    | <i>Kabuli</i>    | Ca_Kabuli_denovo             | 10639200                       | (G/T)       |
| 19683       | CakSNP19683    | <i>Kabuli</i>    | Ca_Kabuli_denovo             | 10639201                       | (A/C)       |



| <b>S.N.</b> | <b>SNP IDs</b> | <b>Cultivars</b> | <b>Chromosomes/scaffolds</b> | <b>Physical positions (bp)</b> | <b>SNPs</b> |
|-------------|----------------|------------------|------------------------------|--------------------------------|-------------|
| 19684       | CakSNP19684    | <i>Kabuli</i>    | Ca_Kabuli_denovo             | 10645075                       | (G/A)       |
| 19685       | CakSNP19685    | <i>Kabuli</i>    | Ca_Kabuli_denovo             | 10648894                       | (A/C)       |
| 19686       | CakSNP19686    | <i>Kabuli</i>    | Ca_Kabuli_denovo             | 10648964                       | (A/G)       |
| 19687       | CakSNP19687    | <i>Kabuli</i>    | Ca_Kabuli_denovo             | 10651838                       | (C/T)       |
| 19688       | CakSNP19688    | <i>Kabuli</i>    | Ca_Kabuli_denovo             | 10652481                       | (A/G)       |
| 19689       | CakSNP19689    | <i>Kabuli</i>    | Ca_Kabuli_denovo             | 10652486                       | (T/C)       |
| 19690       | CakSNP19690    | <i>Kabuli</i>    | Ca_Kabuli_denovo             | 10660520                       | (G/A)       |
| 19691       | CakSNP19691    | <i>Kabuli</i>    | Ca_Kabuli_denovo             | 10675025                       | (A/G)       |
| 19692       | CakSNP19692    | <i>Kabuli</i>    | Ca_Kabuli_denovo             | 10675052                       | (G/A)       |
| 19693       | CakSNP19693    | <i>Kabuli</i>    | Ca_Kabuli_denovo             | 10675879                       | (A/G)       |
| 19694       | CakSNP19694    | <i>Kabuli</i>    | Ca_Kabuli_denovo             | 10682359                       | (A/G)       |
| 19695       | CakSNP19695    | <i>Kabuli</i>    | Ca_Kabuli_denovo             | 10685319                       | (T/A)       |
| 19696       | CakSNP19696    | <i>Kabuli</i>    | Ca_Kabuli_denovo             | 10690207                       | (C/A)       |
| 19697       | CakSNP19697    | <i>Kabuli</i>    | Ca_Kabuli_denovo             | 10690236                       | (T/C)       |
| 19698       | CakSNP19698    | <i>Kabuli</i>    | Ca_Kabuli_denovo             | 10704771                       | (C/T)       |
| 19699       | CakSNP19699    | <i>Kabuli</i>    | Ca_Kabuli_denovo             | 10704772                       | (C/T)       |
| 19700       | CakSNP19700    | <i>Kabuli</i>    | Ca_Kabuli_denovo             | 10709211                       | (G/A)       |
| 19701       | CakSNP19701    | <i>Kabuli</i>    | Ca_Kabuli_denovo             | 10709212                       | (C/T)       |
| 19702       | CakSNP19702    | <i>Kabuli</i>    | Ca_Kabuli_denovo             | 10711513                       | (C/T)       |
| 19703       | CakSNP19703    | <i>Kabuli</i>    | Ca_Kabuli_denovo             | 10717240                       | (C/T)       |
| 19704       | CakSNP19704    | <i>Kabuli</i>    | Ca_Kabuli_denovo             | 10725261                       | (T/C)       |
| 19705       | CakSNP19705    | <i>Kabuli</i>    | Ca_Kabuli_denovo             | 10725280                       | (A/G)       |
| 19706       | CakSNP19706    | <i>Kabuli</i>    | Ca_Kabuli_denovo             | 10726837                       | (T/G)       |
| 19707       | CakSNP19707    | <i>Kabuli</i>    | Ca_Kabuli_denovo             | 10726857                       | (A/G)       |
| 19708       | CakSNP19708    | <i>Kabuli</i>    | Ca_Kabuli_denovo             | 10727523                       | (C/T)       |
| 19709       | CakSNP19709    | <i>Kabuli</i>    | Ca_Kabuli_denovo             | 10737510                       | (A/C)       |
| 19710       | CakSNP19710    | <i>Kabuli</i>    | Ca_Kabuli_denovo             | 10737559                       | (A/G)       |
| 19711       | CakSNP19711    | <i>Kabuli</i>    | Ca_Kabuli_denovo             | 10744775                       | (G/A)       |
| 19712       | CakSNP19712    | <i>Kabuli</i>    | Ca_Kabuli_denovo             | 10748089                       | (T/C)       |
| 19713       | CakSNP19713    | <i>Kabuli</i>    | Ca_Kabuli_denovo             | 10748469                       | (T/G)       |
| 19714       | CakSNP19714    | <i>Kabuli</i>    | Ca_Kabuli_denovo             | 10750888                       | (A/G)       |
| 19715       | CakSNP19715    | <i>Kabuli</i>    | Ca_Kabuli_denovo             | 10750911                       | (T/C)       |
| 19716       | CakSNP19716    | <i>Kabuli</i>    | Ca_Kabuli_denovo             | 10750941                       | (G/A)       |
| 19717       | CakSNP19717    | <i>Kabuli</i>    | Ca_Kabuli_denovo             | 10765332                       | (C/T)       |
| 19718       | CakSNP19718    | <i>Kabuli</i>    | Ca_Kabuli_denovo             | 10774154                       | (C/A)       |
| 19719       | CakSNP19719    | <i>Kabuli</i>    | Ca_Kabuli_denovo             | 10774193                       | (A/G)       |
| 19720       | CakSNP19720    | <i>Kabuli</i>    | Ca_Kabuli_denovo             | 10779799                       | (C/G)       |
| 19721       | CakSNP19721    | <i>Kabuli</i>    | Ca_Kabuli_denovo             | 10779817                       | (C/T)       |

| <b>S.N.</b> | <b>SNP IDs</b> | <b>Cultivars</b> | <b>Chromosomes/scaffolds</b> | <b>Physical positions (bp)</b> | <b>SNPs</b> |
|-------------|----------------|------------------|------------------------------|--------------------------------|-------------|
| 19722       | CakSNP19722    | <i>Kabuli</i>    | Ca_Kabuli_denovo             | 10784206                       | (C/G)       |
| 19723       | CakSNP19723    | <i>Kabuli</i>    | Ca_Kabuli_denovo             | 10785716                       | (C/G)       |
| 19724       | CakSNP19724    | <i>Kabuli</i>    | Ca_Kabuli_denovo             | 10793538                       | (C/T)       |
| 19725       | CakSNP19725    | <i>Kabuli</i>    | Ca_Kabuli_denovo             | 10801968                       | (C/G)       |
| 19726       | CakSNP19726    | <i>Kabuli</i>    | Ca_Kabuli_denovo             | 10802297                       | (T/C)       |
| 19727       | CakSNP19727    | <i>Kabuli</i>    | Ca_Kabuli_denovo             | 10802312                       | (A/G)       |
| 19728       | CakSNP19728    | <i>Kabuli</i>    | Ca_Kabuli_denovo             | 10804689                       | (A/C)       |
| 19729       | CakSNP19729    | <i>Kabuli</i>    | Ca_Kabuli_denovo             | 10804725                       | (A/C)       |
| 19730       | CakSNP19730    | <i>Kabuli</i>    | Ca_Kabuli_denovo             | 10815305                       | (C/T)       |
| 19731       | CakSNP19731    | <i>Kabuli</i>    | Ca_Kabuli_denovo             | 10816024                       | (A/G)       |
| 19732       | CakSNP19732    | <i>Kabuli</i>    | Ca_Kabuli_denovo             | 10820299                       | (T/C)       |
| 19733       | CakSNP19733    | <i>Kabuli</i>    | Ca_Kabuli_denovo             | 10820305                       | (T/G)       |
| 19734       | CakSNP19734    | <i>Kabuli</i>    | Ca_Kabuli_denovo             | 10827752                       | (T/C)       |
| 19735       | CakSNP19735    | <i>Kabuli</i>    | Ca_Kabuli_denovo             | 10827766                       | (C/G)       |
| 19736       | CakSNP19736    | <i>Kabuli</i>    | Ca_Kabuli_denovo             | 10829958                       | (G/C)       |
| 19737       | CakSNP19737    | <i>Kabuli</i>    | Ca_Kabuli_denovo             | 10830004                       | (C/T)       |
| 19738       | CakSNP19738    | <i>Kabuli</i>    | Ca_Kabuli_denovo             | 10836808                       | (T/G)       |
| 19739       | CakSNP19739    | <i>Kabuli</i>    | Ca_Kabuli_denovo             | 10837882                       | (A/G)       |
| 19740       | CakSNP19740    | <i>Kabuli</i>    | Ca_Kabuli_denovo             | 10837892                       | (A/C)       |
| 19741       | CakSNP19741    | <i>Kabuli</i>    | Ca_Kabuli_denovo             | 10843751                       | (G/A)       |
| 19742       | CakSNP19742    | <i>Kabuli</i>    | Ca_Kabuli_denovo             | 10852994                       | (G/T)       |
| 19743       | CakSNP19743    | <i>Kabuli</i>    | Ca_Kabuli_denovo             | 10853440                       | (C/A)       |
| 19744       | CakSNP19744    | <i>Kabuli</i>    | Ca_Kabuli_denovo             | 10855184                       | (A/C)       |
| 19745       | CakSNP19745    | <i>Kabuli</i>    | Ca_Kabuli_denovo             | 10859383                       | (A/G)       |
| 19746       | CakSNP19746    | <i>Kabuli</i>    | Ca_Kabuli_denovo             | 10859422                       | (C/T)       |
| 19747       | CakSNP19747    | <i>Kabuli</i>    | Ca_Kabuli_denovo             | 10863716                       | (A/C)       |
| 19748       | CakSNP19748    | <i>Kabuli</i>    | Ca_Kabuli_denovo             | 10863767                       | (C/T)       |
| 19749       | CakSNP19749    | <i>Kabuli</i>    | Ca_Kabuli_denovo             | 10867451                       | (C/A)       |
| 19750       | CakSNP19750    | <i>Kabuli</i>    | Ca_Kabuli_denovo             | 10868177                       | (C/T)       |
| 19751       | CakSNP19751    | <i>Kabuli</i>    | Ca_Kabuli_denovo             | 10871629                       | (C/T)       |
| 19752       | CakSNP19752    | <i>Kabuli</i>    | Ca_Kabuli_denovo             | 10871630                       | (G/A)       |
| 19753       | CakSNP19753    | <i>Kabuli</i>    | Ca_Kabuli_denovo             | 10872857                       | (C/A)       |
| 19754       | CakSNP19754    | <i>Kabuli</i>    | Ca_Kabuli_denovo             | 10872867                       | (T/G)       |
| 19755       | CakSNP19755    | <i>Kabuli</i>    | Ca_Kabuli_denovo             | 10873672                       | (G/C)       |
| 19756       | CakSNP19756    | <i>Kabuli</i>    | Ca_Kabuli_denovo             | 10879509                       | (A/G)       |
| 19757       | CakSNP19757    | <i>Kabuli</i>    | Ca_Kabuli_denovo             | 10880917                       | (G/C)       |
| 19758       | CakSNP19758    | <i>Kabuli</i>    | Ca_Kabuli_denovo             | 10882337                       | (C/G)       |
| 19759       | CakSNP19759    | <i>Kabuli</i>    | Ca_Kabuli_denovo             | 10884357                       | (A/G)       |

| <b>S.N.</b> | <b>SNP IDs</b> | <b>Cultivars</b> | <b>Chromosomes/scaffolds</b> | <b>Physical positions (bp)</b> | <b>SNPs</b> |
|-------------|----------------|------------------|------------------------------|--------------------------------|-------------|
| 19760       | CakSNP19760    | <i>Kabuli</i>    | Ca_Kabuli_denovo             | 10884407                       | (A/T)       |
| 19761       | CakSNP19761    | <i>Kabuli</i>    | Ca_Kabuli_denovo             | 10894351                       | (C/A)       |
| 19762       | CakSNP19762    | <i>Kabuli</i>    | Ca_Kabuli_denovo             | 10894895                       | (A/G)       |
| 19763       | CakSNP19763    | <i>Kabuli</i>    | Ca_Kabuli_denovo             | 10894913                       | (T/C)       |
| 19764       | CakSNP19764    | <i>Kabuli</i>    | Ca_Kabuli_denovo             | 10897663                       | (C/T)       |
| 19765       | CakSNP19765    | <i>Kabuli</i>    | Ca_Kabuli_denovo             | 10905659                       | (A/G)       |
| 19766       | CakSNP19766    | <i>Kabuli</i>    | Ca_Kabuli_denovo             | 10929918                       | (A/T)       |
| 19767       | CakSNP19767    | <i>Kabuli</i>    | Ca_Kabuli_denovo             | 10930163                       | (G/T)       |
| 19768       | CakSNP19768    | <i>Kabuli</i>    | Ca_Kabuli_denovo             | 10935880                       | (C/T)       |
| 19769       | CakSNP19769    | <i>Kabuli</i>    | Ca_Kabuli_denovo             | 10935937                       | (A/C)       |
| 19770       | CakSNP19770    | <i>Kabuli</i>    | Ca_Kabuli_denovo             | 10936993                       | (A/G)       |
| 19771       | CakSNP19771    | <i>Kabuli</i>    | Ca_Kabuli_denovo             | 10942394                       | (A/G)       |
| 19772       | CakSNP19772    | <i>Kabuli</i>    | Ca_Kabuli_denovo             | 10942431                       | (A/G)       |
| 19773       | CakSNP19773    | <i>Kabuli</i>    | Ca_Kabuli_denovo             | 10943375                       | (T/C)       |
| 19774       | CakSNP19774    | <i>Kabuli</i>    | Ca_Kabuli_denovo             | 10943443                       | (C/T)       |
| 19775       | CakSNP19775    | <i>Kabuli</i>    | Ca_Kabuli_denovo             | 10945287                       | (G/A)       |
| 19776       | CakSNP19776    | <i>Kabuli</i>    | Ca_Kabuli_denovo             | 10945318                       | (G/C)       |
| 19777       | CakSNP19777    | <i>Kabuli</i>    | Ca_Kabuli_denovo             | 10951393                       | (G/T)       |
| 19778       | CakSNP19778    | <i>Kabuli</i>    | Ca_Kabuli_denovo             | 10951395                       | (A/G)       |
| 19779       | CakSNP19779    | <i>Kabuli</i>    | Ca_Kabuli_denovo             | 10957310                       | (C/T)       |
| 19780       | CakSNP19780    | <i>Kabuli</i>    | Ca_Kabuli_denovo             | 10958307                       | (C/T)       |
| 19781       | CakSNP19781    | <i>Kabuli</i>    | Ca_Kabuli_denovo             | 10958312                       | (C/A)       |
| 19782       | CakSNP19782    | <i>Kabuli</i>    | Ca_Kabuli_denovo             | 10959965                       | (C/G)       |
| 19783       | CakSNP19783    | <i>Kabuli</i>    | Ca_Kabuli_denovo             | 10960754                       | (G/A)       |
| 19784       | CakSNP19784    | <i>Kabuli</i>    | Ca_Kabuli_denovo             | 10964203                       | (C/T)       |
| 19785       | CakSNP19785    | <i>Kabuli</i>    | Ca_Kabuli_denovo             | 10964227                       | (G/A)       |
| 19786       | CakSNP19786    | <i>Kabuli</i>    | Ca_Kabuli_denovo             | 10971033                       | (G/A)       |
| 19787       | CakSNP19787    | <i>Kabuli</i>    | Ca_Kabuli_denovo             | 10971053                       | (G/C)       |
| 19788       | CakSNP19788    | <i>Kabuli</i>    | Ca_Kabuli_denovo             | 10977079                       | (A/C)       |
| 19789       | CakSNP19789    | <i>Kabuli</i>    | Ca_Kabuli_denovo             | 10978239                       | (A/G)       |
| 19790       | CakSNP19790    | <i>Kabuli</i>    | Ca_Kabuli_denovo             | 10978244                       | (G/A)       |
| 19791       | CakSNP19791    | <i>Kabuli</i>    | Ca_Kabuli_denovo             | 10978256                       | (C/G)       |
| 19792       | CakSNP19792    | <i>Kabuli</i>    | Ca_Kabuli_denovo             | 10985386                       | (T/C)       |
| 19793       | CakSNP19793    | <i>Kabuli</i>    | Ca_Kabuli_denovo             | 10985566                       | (A/G)       |
| 19794       | CakSNP19794    | <i>Kabuli</i>    | Ca_Kabuli_denovo             | 10985567                       | (T/C)       |
| 19795       | CakSNP19795    | <i>Kabuli</i>    | Ca_Kabuli_denovo             | 10986704                       | (C/G)       |
| 19796       | CakSNP19796    | <i>Kabuli</i>    | Ca_Kabuli_denovo             | 10986710                       | (C/G)       |
| 19797       | CakSNP19797    | <i>Kabuli</i>    | Ca_Kabuli_denovo             | 10987146                       | (T/G)       |

| <b>S.N.</b> | <b>SNP IDs</b> | <b>Cultivars</b> | <b>Chromosomes/scaffolds</b> | <b>Physical positions (bp)</b> | <b>SNPs</b> |
|-------------|----------------|------------------|------------------------------|--------------------------------|-------------|
| 19798       | CakSNP19798    | <i>Kabuli</i>    | Ca_Kabuli_denovo             | 10987152                       | (T/A)       |
| 19799       | CakSNP19799    | <i>Kabuli</i>    | Ca_Kabuli_denovo             | 10989989                       | (T/G)       |
| 19800       | CakSNP19800    | <i>Kabuli</i>    | Ca_Kabuli_denovo             | 10994002                       | (C/T)       |
| 19801       | CakSNP19801    | <i>Kabuli</i>    | Ca_Kabuli_denovo             | 10994032                       | (T/C)       |
| 19802       | CakSNP19802    | <i>Kabuli</i>    | Ca_Kabuli_denovo             | 10996772                       | (C/T)       |
| 19803       | CakSNP19803    | <i>Kabuli</i>    | Ca_Kabuli_denovo             | 11000849                       | (G/C)       |
| 19804       | CakSNP19804    | <i>Kabuli</i>    | Ca_Kabuli_denovo             | 11000856                       | (C/G)       |
| 19805       | CakSNP19805    | <i>Kabuli</i>    | Ca_Kabuli_denovo             | 11009676                       | (C/T)       |
| 19806       | CakSNP19806    | <i>Kabuli</i>    | Ca_Kabuli_denovo             | 11015742                       | (G/A)       |
| 19807       | CakSNP19807    | <i>Kabuli</i>    | Ca_Kabuli_denovo             | 11018664                       | (C/A)       |
| 19808       | CakSNP19808    | <i>Kabuli</i>    | Ca_Kabuli_denovo             | 11018718                       | (C/G)       |
| 19809       | CakSNP19809    | <i>Kabuli</i>    | Ca_Kabuli_denovo             | 11022673                       | (C/G)       |
| 19810       | CakSNP19810    | <i>Kabuli</i>    | Ca_Kabuli_denovo             | 11022685                       | (T/C)       |
| 19811       | CakSNP19811    | <i>Kabuli</i>    | Ca_Kabuli_denovo             | 11022766                       | (C/T)       |
| 19812       | CakSNP19812    | <i>Kabuli</i>    | Ca_Kabuli_denovo             | 11025360                       | (A/C)       |
| 19813       | CakSNP19813    | <i>Kabuli</i>    | Ca_Kabuli_denovo             | 11025765                       | (C/G)       |
| 19814       | CakSNP19814    | <i>Kabuli</i>    | Ca_Kabuli_denovo             | 11035425                       | (C/T)       |
| 19815       | CakSNP19815    | <i>Kabuli</i>    | Ca_Kabuli_denovo             | 11035455                       | (C/G)       |
| 19816       | CakSNP19816    | <i>Kabuli</i>    | Ca_Kabuli_denovo             | 11038835                       | (C/G)       |
| 19817       | CakSNP19817    | <i>Kabuli</i>    | Ca_Kabuli_denovo             | 11038859                       | (T/C)       |
| 19818       | CakSNP19818    | <i>Kabuli</i>    | Ca_Kabuli_denovo             | 11041618                       | (G/A)       |
| 19819       | CakSNP19819    | <i>Kabuli</i>    | Ca_Kabuli_denovo             | 11041631                       | (A/G)       |
| 19820       | CakSNP19820    | <i>Kabuli</i>    | Ca_Kabuli_denovo             | 11049997                       | (A/G)       |
| 19821       | CakSNP19821    | <i>Kabuli</i>    | Ca_Kabuli_denovo             | 11050024                       | (G/A)       |
| 19822       | CakSNP19822    | <i>Kabuli</i>    | Ca_Kabuli_denovo             | 11052623                       | (T/G)       |
| 19823       | CakSNP19823    | <i>Kabuli</i>    | Ca_Kabuli_denovo             | 11052626                       | (T/C)       |
| 19824       | CakSNP19824    | <i>Kabuli</i>    | Ca_Kabuli_denovo             | 11059845                       | (G/A)       |
| 19825       | CakSNP19825    | <i>Kabuli</i>    | Ca_Kabuli_denovo             | 11060901                       | (G/C)       |
| 19826       | CakSNP19826    | <i>Kabuli</i>    | Ca_Kabuli_denovo             | 11063106                       | (T/A)       |
| 19827       | CakSNP19827    | <i>Kabuli</i>    | Ca_Kabuli_denovo             | 11078845                       | (G/C)       |
| 19828       | CakSNP19828    | <i>Kabuli</i>    | Ca_Kabuli_denovo             | 11081534                       | (T/C)       |
| 19829       | CakSNP19829    | <i>Kabuli</i>    | Ca_Kabuli_denovo             | 11081662                       | (C/T)       |
| 19830       | CakSNP19830    | <i>Kabuli</i>    | Ca_Kabuli_denovo             | 11083492                       | (G/A)       |
| 19831       | CakSNP19831    | <i>Kabuli</i>    | Ca_Kabuli_denovo             | 11083548                       | (G/A)       |
| 19832       | CakSNP19832    | <i>Kabuli</i>    | Ca_Kabuli_denovo             | 11086369                       | (G/A)       |
| 19833       | CakSNP19833    | <i>Kabuli</i>    | Ca_Kabuli_denovo             | 11099095                       | (G/A)       |
| 19834       | CakSNP19834    | <i>Kabuli</i>    | Ca_Kabuli_denovo             | 11101450                       | (A/G)       |
| 19835       | CakSNP19835    | <i>Kabuli</i>    | Ca_Kabuli_denovo             | 11101462                       | (T/C)       |

| <b>S.N.</b> | <b>SNP IDs</b> | <b>Cultivars</b> | <b>Chromosomes/scaffolds</b> | <b>Physical positions (bp)</b> | <b>SNPs</b> |
|-------------|----------------|------------------|------------------------------|--------------------------------|-------------|
| 19836       | CakSNP19836    | <i>Kabuli</i>    | Ca_Kabuli_denovo             | 11114537                       | (G/C)       |
| 19837       | CakSNP19837    | <i>Kabuli</i>    | Ca_Kabuli_denovo             | 11116590                       | (A/G)       |
| 19838       | CakSNP19838    | <i>Kabuli</i>    | Ca_Kabuli_denovo             | 11116620                       | (T/C)       |
| 19839       | CakSNP19839    | <i>Kabuli</i>    | Ca_Kabuli_denovo             | 11117655                       | (A/C)       |
| 19840       | CakSNP19840    | <i>Kabuli</i>    | Ca_Kabuli_denovo             | 11127124                       | (T/C)       |
| 19841       | CakSNP19841    | <i>Kabuli</i>    | Ca_Kabuli_denovo             | 11129839                       | (G/A)       |
| 19842       | CakSNP19842    | <i>Kabuli</i>    | Ca_Kabuli_denovo             | 11132036                       | (G/C)       |
| 19843       | CakSNP19843    | <i>Kabuli</i>    | Ca_Kabuli_denovo             | 11136790                       | (A/G)       |
| 19844       | CakSNP19844    | <i>Kabuli</i>    | Ca_Kabuli_denovo             | 11136841                       | (C/T)       |
| 19845       | CakSNP19845    | <i>Kabuli</i>    | Ca_Kabuli_denovo             | 11137317                       | (G/A)       |
| 19846       | CakSNP19846    | <i>Kabuli</i>    | Ca_Kabuli_denovo             | 11137921                       | (G/T)       |
| 19847       | CakSNP19847    | <i>Kabuli</i>    | Ca_Kabuli_denovo             | 11143568                       | (A/G)       |
| 19848       | CakSNP19848    | <i>Kabuli</i>    | Ca_Kabuli_denovo             | 11144773                       | (A/G)       |
| 19849       | CakSNP19849    | <i>Kabuli</i>    | Ca_Kabuli_denovo             | 11144842                       | (A/C)       |
| 19850       | CakSNP19850    | <i>Kabuli</i>    | Ca_Kabuli_denovo             | 11146079                       | (C/A)       |
| 19851       | CakSNP19851    | <i>Kabuli</i>    | Ca_Kabuli_denovo             | 11161889                       | (G/T)       |
| 19852       | CakSNP19852    | <i>Kabuli</i>    | Ca_Kabuli_denovo             | 11162483                       | (G/T)       |
| 19853       | CakSNP19853    | <i>Kabuli</i>    | Ca_Kabuli_denovo             | 11162500                       | (A/G)       |
| 19854       | CakSNP19854    | <i>Kabuli</i>    | Ca_Kabuli_denovo             | 11165328                       | (A/G)       |
| 19855       | CakSNP19855    | <i>Kabuli</i>    | Ca_Kabuli_denovo             | 11165347                       | (A/C)       |
| 19856       | CakSNP19856    | <i>Kabuli</i>    | Ca_Kabuli_denovo             | 11171823                       | (G/T)       |
| 19857       | CakSNP19857    | <i>Kabuli</i>    | Ca_Kabuli_denovo             | 11172625                       | (A/G)       |
| 19858       | CakSNP19858    | <i>Kabuli</i>    | Ca_Kabuli_denovo             | 11172634                       | (A/G)       |
| 19859       | CakSNP19859    | <i>Kabuli</i>    | Ca_Kabuli_denovo             | 11174544                       | (G/T)       |
| 19860       | CakSNP19860    | <i>Kabuli</i>    | Ca_Kabuli_denovo             | 11174567                       | (A/G)       |
| 19861       | CakSNP19861    | <i>Kabuli</i>    | Ca_Kabuli_denovo             | 11177330                       | (C/G)       |
| 19862       | CakSNP19862    | <i>Kabuli</i>    | Ca_Kabuli_denovo             | 11185106                       | (C/G)       |
| 19863       | CakSNP19863    | <i>Kabuli</i>    | Ca_Kabuli_denovo             | 11188583                       | (G/C)       |
| 19864       | CakSNP19864    | <i>Kabuli</i>    | Ca_Kabuli_denovo             | 11193535                       | (C/G)       |
| 19865       | CakSNP19865    | <i>Kabuli</i>    | Ca_Kabuli_denovo             | 11193573                       | (G/A)       |
| 19866       | CakSNP19866    | <i>Kabuli</i>    | Ca_Kabuli_denovo             | 11195851                       | (G/T)       |
| 19867       | CakSNP19867    | <i>Kabuli</i>    | Ca_Kabuli_denovo             | 11204126                       | (C/T)       |
| 19868       | CakSNP19868    | <i>Kabuli</i>    | Ca_Kabuli_denovo             | 11204171                       | (A/C)       |
| 19869       | CakSNP19869    | <i>Kabuli</i>    | Ca_Kabuli_denovo             | 11205211                       | (G/A)       |
| 19870       | CakSNP19870    | <i>Kabuli</i>    | Ca_Kabuli_denovo             | 11205220                       | (C/A)       |
| 19871       | CakSNP19871    | <i>Kabuli</i>    | Ca_Kabuli_denovo             | 11205976                       | (A/G)       |
| 19872       | CakSNP19872    | <i>Kabuli</i>    | Ca_Kabuli_denovo             | 11205991                       | (C/T)       |
| 19873       | CakSNP19873    | <i>Kabuli</i>    | Ca_Kabuli_denovo             | 11207799                       | (T/C)       |

| <b>S.N.</b> | <b>SNP IDs</b> | <b>Cultivars</b> | <b>Chromosomes/scaffolds</b> | <b>Physical positions (bp)</b> | <b>SNPs</b> |
|-------------|----------------|------------------|------------------------------|--------------------------------|-------------|
| 19874       | CakSNP19874    | <i>Kabuli</i>    | Ca_Kabuli_denovo             | 11210096                       | (T/C)       |
| 19875       | CakSNP19875    | <i>Kabuli</i>    | Ca_Kabuli_denovo             | 11212029                       | (T/C)       |
| 19876       | CakSNP19876    | <i>Kabuli</i>    | Ca_Kabuli_denovo             | 11212077                       | (A/G)       |
| 19877       | CakSNP19877    | <i>Kabuli</i>    | Ca_Kabuli_denovo             | 11212273                       | (G/C)       |
| 19878       | CakSNP19878    | <i>Kabuli</i>    | Ca_Kabuli_denovo             | 11212276                       | (A/G)       |
| 19879       | CakSNP19879    | <i>Kabuli</i>    | Ca_Kabuli_denovo             | 11226427                       | (A/G)       |
| 19880       | CakSNP19880    | <i>Kabuli</i>    | Ca_Kabuli_denovo             | 11226478                       | (C/G)       |
| 19881       | CakSNP19881    | <i>Kabuli</i>    | Ca_Kabuli_denovo             | 11232178                       | (C/A)       |
| 19882       | CakSNP19882    | <i>Kabuli</i>    | Ca_Kabuli_denovo             | 11232208                       | (T/C)       |
| 19883       | CakSNP19883    | <i>Kabuli</i>    | Ca_Kabuli_denovo             | 11235535                       | (T/C)       |
| 19884       | CakSNP19884    | <i>Kabuli</i>    | Ca_Kabuli_denovo             | 11238073                       | (G/A)       |
| 19885       | CakSNP19885    | <i>Kabuli</i>    | Ca_Kabuli_denovo             | 11238076                       | (C/G)       |
| 19886       | CakSNP19886    | <i>Kabuli</i>    | Ca_Kabuli_denovo             | 11243846                       | (C/T)       |
| 19887       | CakSNP19887    | <i>Kabuli</i>    | Ca_Kabuli_denovo             | 11247995                       | (G/A)       |
| 19888       | CakSNP19888    | <i>Kabuli</i>    | Ca_Kabuli_denovo             | 11251636                       | (A/G)       |
| 19889       | CakSNP19889    | <i>Kabuli</i>    | Ca_Kabuli_denovo             | 11253863                       | (C/T)       |
| 19890       | CakSNP19890    | <i>Kabuli</i>    | Ca_Kabuli_denovo             | 11253937                       | (C/T)       |
| 19891       | CakSNP19891    | <i>Kabuli</i>    | Ca_Kabuli_denovo             | 11253941                       | (G/T)       |
| 19892       | CakSNP19892    | <i>Kabuli</i>    | Ca_Kabuli_denovo             | 11254529                       | (C/A)       |
| 19893       | CakSNP19893    | <i>Kabuli</i>    | Ca_Kabuli_denovo             | 11254535                       | (G/C)       |
| 19894       | CakSNP19894    | <i>Kabuli</i>    | Ca_Kabuli_denovo             | 11257861                       | (A/G)       |
| 19895       | CakSNP19895    | <i>Kabuli</i>    | Ca_Kabuli_denovo             | 11257890                       | (T/C)       |
| 19896       | CakSNP19896    | <i>Kabuli</i>    | Ca_Kabuli_denovo             | 11260640                       | (C/T)       |
| 19897       | CakSNP19897    | <i>Kabuli</i>    | Ca_Kabuli_denovo             | 11261285                       | (T/G)       |
| 19898       | CakSNP19898    | <i>Kabuli</i>    | Ca_Kabuli_denovo             | 11263910                       | (C/T)       |
| 19899       | CakSNP19899    | <i>Kabuli</i>    | Ca_Kabuli_denovo             | 11264488                       | (A/G)       |
| 19900       | CakSNP19900    | <i>Kabuli</i>    | Ca_Kabuli_denovo             | 11266340                       | (C/G)       |
| 19901       | CakSNP19901    | <i>Kabuli</i>    | Ca_Kabuli_denovo             | 11268597                       | (A/G)       |
| 19902       | CakSNP19902    | <i>Kabuli</i>    | Ca_Kabuli_denovo             | 11269385                       | (C/A)       |
| 19903       | CakSNP19903    | <i>Kabuli</i>    | Ca_Kabuli_denovo             | 11274782                       | (G/A)       |
| 19904       | CakSNP19904    | <i>Kabuli</i>    | Ca_Kabuli_denovo             | 11274830                       | (A/G)       |
| 19905       | CakSNP19905    | <i>Kabuli</i>    | Ca_Kabuli_denovo             | 11276474                       | (C/T)       |
| 19906       | CakSNP19906    | <i>Kabuli</i>    | Ca_Kabuli_denovo             | 11281562                       | (A/G)       |
| 19907       | CakSNP19907    | <i>Kabuli</i>    | Ca_Kabuli_denovo             | 11282591                       | (A/T)       |
| 19908       | CakSNP19908    | <i>Kabuli</i>    | Ca_Kabuli_denovo             | 11284197                       | (C/T)       |
| 19909       | CakSNP19909    | <i>Kabuli</i>    | Ca_Kabuli_denovo             | 11284218                       | (A/G)       |
| 19910       | CakSNP19910    | <i>Kabuli</i>    | Ca_Kabuli_denovo             | 11294318                       | (T/C)       |
| 19911       | CakSNP19911    | <i>Kabuli</i>    | Ca_Kabuli_denovo             | 11294360                       | (T/C)       |

| <b>S.N.</b> | <b>SNP IDs</b> | <b>Cultivars</b> | <b>Chromosomes/scaffolds</b> | <b>Physical positions (bp)</b> | <b>SNPs</b> |
|-------------|----------------|------------------|------------------------------|--------------------------------|-------------|
| 19912       | CakSNP19912    | <i>Kabuli</i>    | Ca_Kabuli_denovo             | 11298034                       | (A/G)       |
| 19913       | CakSNP19913    | <i>Kabuli</i>    | Ca_Kabuli_denovo             | 11302009                       | (A/G)       |
| 19914       | CakSNP19914    | <i>Kabuli</i>    | Ca_Kabuli_denovo             | 11303066                       | (G/A)       |
| 19915       | CakSNP19915    | <i>Kabuli</i>    | Ca_Kabuli_denovo             | 11303067                       | (C/G)       |
| 19916       | CakSNP19916    | <i>Kabuli</i>    | Ca_Kabuli_denovo             | 11303075                       | (A/G)       |
| 19917       | CakSNP19917    | <i>Kabuli</i>    | Ca_Kabuli_denovo             | 11305242                       | (C/G)       |
| 19918       | CakSNP19918    | <i>Kabuli</i>    | Ca_Kabuli_denovo             | 11311346                       | (G/A)       |
| 19919       | CakSNP19919    | <i>Kabuli</i>    | Ca_Kabuli_denovo             | 11311355                       | (C/G)       |
| 19920       | CakSNP19920    | <i>Kabuli</i>    | Ca_Kabuli_denovo             | 11313010                       | (G/A)       |
| 19921       | CakSNP19921    | <i>Kabuli</i>    | Ca_Kabuli_denovo             | 11313019                       | (G/T)       |
| 19922       | CakSNP19922    | <i>Kabuli</i>    | Ca_Kabuli_denovo             | 11320821                       | (C/T)       |
| 19923       | CakSNP19923    | <i>Kabuli</i>    | Ca_Kabuli_denovo             | 11320852                       | (C/T)       |
| 19924       | CakSNP19924    | <i>Kabuli</i>    | Ca_Kabuli_denovo             | 11320859                       | (C/G)       |
| 19925       | CakSNP19925    | <i>Kabuli</i>    | Ca_Kabuli_denovo             | 11321893                       | (C/A)       |
| 19926       | CakSNP19926    | <i>Kabuli</i>    | Ca_Kabuli_denovo             | 11322134                       | (A/G)       |
| 19927       | CakSNP19927    | <i>Kabuli</i>    | Ca_Kabuli_denovo             | 11322171                       | (A/G)       |
| 19928       | CakSNP19928    | <i>Kabuli</i>    | Ca_Kabuli_denovo             | 11322424                       | (G/A)       |
| 19929       | CakSNP19929    | <i>Kabuli</i>    | Ca_Kabuli_denovo             | 11328453                       | (T/C)       |
| 19930       | CakSNP19930    | <i>Kabuli</i>    | Ca_Kabuli_denovo             | 11328457                       | (A/G)       |
| 19931       | CakSNP19931    | <i>Kabuli</i>    | Ca_Kabuli_denovo             | 11330932                       | (A/C)       |
| 19932       | CakSNP19932    | <i>Kabuli</i>    | Ca_Kabuli_denovo             | 11335776                       | (T/C)       |
| 19933       | CakSNP19933    | <i>Kabuli</i>    | Ca_Kabuli_denovo             | 11335791                       | (T/C)       |
| 19934       | CakSNP19934    | <i>Kabuli</i>    | Ca_Kabuli_denovo             | 11336858                       | (T/C)       |
| 19935       | CakSNP19935    | <i>Kabuli</i>    | Ca_Kabuli_denovo             | 11337191                       | (G/A)       |
| 19936       | CakSNP19936    | <i>Kabuli</i>    | Ca_Kabuli_denovo             | 11338105                       | (G/C)       |
| 19937       | CakSNP19937    | <i>Kabuli</i>    | Ca_Kabuli_denovo             | 11338164                       | (A/T)       |
| 19938       | CakSNP19938    | <i>Kabuli</i>    | Ca_Kabuli_denovo             | 11338385                       | (G/A)       |
| 19939       | CakSNP19939    | <i>Kabuli</i>    | Ca_Kabuli_denovo             | 11338391                       | (C/G)       |
| 19940       | CakSNP19940    | <i>Kabuli</i>    | Ca_Kabuli_denovo             | 11346296                       | (G/T)       |
| 19941       | CakSNP19941    | <i>Kabuli</i>    | Ca_Kabuli_denovo             | 11353664                       | (T/C)       |
| 19942       | CakSNP19942    | <i>Kabuli</i>    | Ca_Kabuli_denovo             | 11361169                       | (G/C)       |
| 19943       | CakSNP19943    | <i>Kabuli</i>    | Ca_Kabuli_denovo             | 11361193                       | (C/A)       |
| 19944       | CakSNP19944    | <i>Kabuli</i>    | Ca_Kabuli_denovo             | 11361211                       | (A/G)       |
| 19945       | CakSNP19945    | <i>Kabuli</i>    | Ca_Kabuli_denovo             | 11361500                       | (G/C)       |
| 19946       | CakSNP19946    | <i>Kabuli</i>    | Ca_Kabuli_denovo             | 11361520                       | (C/T)       |
| 19947       | CakSNP19947    | <i>Kabuli</i>    | Ca_Kabuli_denovo             | 11375757                       | (C/T)       |
| 19948       | CakSNP19948    | <i>Kabuli</i>    | Ca_Kabuli_denovo             | 11378866                       | (C/T)       |
| 19949       | CakSNP19949    | <i>Kabuli</i>    | Ca_Kabuli_denovo             | 11378886                       | (G/C)       |

| <b>S.N.</b> | <b>SNP IDs</b> | <b>Cultivars</b> | <b>Chromosomes/scaffolds</b> | <b>Physical positions (bp)</b> | <b>SNPs</b> |
|-------------|----------------|------------------|------------------------------|--------------------------------|-------------|
| 19950       | CakSNP19950    | <i>Kabuli</i>    | Ca_Kabuli_denovo             | 11386105                       | (C/T)       |
| 19951       | CakSNP19951    | <i>Kabuli</i>    | Ca_Kabuli_denovo             | 11386154                       | (C/G)       |
| 19952       | CakSNP19952    | <i>Kabuli</i>    | Ca_Kabuli_denovo             | 11389200                       | (G/C)       |
| 19953       | CakSNP19953    | <i>Kabuli</i>    | Ca_Kabuli_denovo             | 11393292                       | (C/T)       |
| 19954       | CakSNP19954    | <i>Kabuli</i>    | Ca_Kabuli_denovo             | 11400208                       | (C/G)       |
| 19955       | CakSNP19955    | <i>Kabuli</i>    | Ca_Kabuli_denovo             | 11400582                       | (C/A)       |
| 19956       | CakSNP19956    | <i>Kabuli</i>    | Ca_Kabuli_denovo             | 11402566                       | (C/T)       |
| 19957       | CakSNP19957    | <i>Kabuli</i>    | Ca_Kabuli_denovo             | 11403286                       | (A/G)       |
| 19958       | CakSNP19958    | <i>Kabuli</i>    | Ca_Kabuli_denovo             | 11407953                       | (A/G)       |
| 19959       | CakSNP19959    | <i>Kabuli</i>    | Ca_Kabuli_denovo             | 11416225                       | (A/G)       |
| 19960       | CakSNP19960    | <i>Kabuli</i>    | Ca_Kabuli_denovo             | 11430755                       | (A/G)       |
| 19961       | CakSNP19961    | <i>Kabuli</i>    | Ca_Kabuli_denovo             | 11434250                       | (T/G)       |
| 19962       | CakSNP19962    | <i>Kabuli</i>    | Ca_Kabuli_denovo             | 11441548                       | (G/C)       |
| 19963       | CakSNP19963    | <i>Kabuli</i>    | Ca_Kabuli_denovo             | 11441557                       | (T/C)       |
| 19964       | CakSNP19964    | <i>Kabuli</i>    | Ca_Kabuli_denovo             | 11452594                       | (T/C)       |
| 19965       | CakSNP19965    | <i>Kabuli</i>    | Ca_Kabuli_denovo             | 11452603                       | (A/G)       |
| 19966       | CakSNP19966    | <i>Kabuli</i>    | Ca_Kabuli_denovo             | 11455379                       | (G/T)       |
| 19967       | CakSNP19967    | <i>Kabuli</i>    | Ca_Kabuli_denovo             | 11455475                       | (T/C)       |
| 19968       | CakSNP19968    | <i>Kabuli</i>    | Ca_Kabuli_denovo             | 11455484                       | (C/G)       |
| 19969       | CakSNP19969    | <i>Kabuli</i>    | Ca_Kabuli_denovo             | 11467373                       | (G/A)       |
| 19970       | CakSNP19970    | <i>Kabuli</i>    | Ca_Kabuli_denovo             | 11483928                       | (G/A)       |
| 19971       | CakSNP19971    | <i>Kabuli</i>    | Ca_Kabuli_denovo             | 11485151                       | (G/A)       |
| 19972       | CakSNP19972    | <i>Kabuli</i>    | Ca_Kabuli_denovo             | 11485417                       | (C/A)       |
| 19973       | CakSNP19973    | <i>Kabuli</i>    | Ca_Kabuli_denovo             | 11489691                       | (A/G)       |
| 19974       | CakSNP19974    | <i>Kabuli</i>    | Ca_Kabuli_denovo             | 11489727                       | (A/G)       |
| 19975       | CakSNP19975    | <i>Kabuli</i>    | Ca_Kabuli_denovo             | 11492137                       | (T/C)       |
| 19976       | CakSNP19976    | <i>Kabuli</i>    | Ca_Kabuli_denovo             | 11500226                       | (C/T)       |
| 19977       | CakSNP19977    | <i>Kabuli</i>    | Ca_Kabuli_denovo             | 11500286                       | (A/G)       |
| 19978       | CakSNP19978    | <i>Kabuli</i>    | Ca_Kabuli_denovo             | 11500518                       | (C/T)       |
| 19979       | CakSNP19979    | <i>Kabuli</i>    | Ca_Kabuli_denovo             | 11500549                       | (G/A)       |
| 19980       | CakSNP19980    | <i>Kabuli</i>    | Ca_Kabuli_denovo             | 11509689                       | (A/G)       |
| 19981       | CakSNP19981    | <i>Kabuli</i>    | Ca_Kabuli_denovo             | 11509710                       | (T/A)       |
| 19982       | CakSNP19982    | <i>Kabuli</i>    | Ca_Kabuli_denovo             | 11520113                       | (T/C)       |
| 19983       | CakSNP19983    | <i>Kabuli</i>    | Ca_Kabuli_denovo             | 11520121                       | (T/G)       |
| 19984       | CakSNP19984    | <i>Kabuli</i>    | Ca_Kabuli_denovo             | 11522244                       | (T/C)       |
| 19985       | CakSNP19985    | <i>Kabuli</i>    | Ca_Kabuli_denovo             | 11522247                       | (G/A)       |
| 19986       | CakSNP19986    | <i>Kabuli</i>    | Ca_Kabuli_denovo             | 11524862                       | (A/G)       |
| 19987       | CakSNP19987    | <i>Kabuli</i>    | Ca_Kabuli_denovo             | 11524904                       | (A/G)       |



| <b>S.N.</b> | <b>SNP IDs</b> | <b>Cultivars</b> | <b>Chromosomes/scaffolds</b> | <b>Physical positions (bp)</b> | <b>SNPs</b> |
|-------------|----------------|------------------|------------------------------|--------------------------------|-------------|
| 19988       | CakSNP19988    | <i>Kabuli</i>    | Ca_Kabuli_denovo             | 11526181                       | (G/C)       |
| 19989       | CakSNP19989    | <i>Kabuli</i>    | Ca_Kabuli_denovo             | 11526429                       | (C/T)       |
| 19990       | CakSNP19990    | <i>Kabuli</i>    | Ca_Kabuli_denovo             | 11526440                       | (C/T)       |
| 19991       | CakSNP19991    | <i>Kabuli</i>    | Ca_Kabuli_denovo             | 11536624                       | (T/G)       |
| 19992       | CakSNP19992    | <i>Kabuli</i>    | Ca_Kabuli_denovo             | 11537381                       | (G/A)       |
| 19993       | CakSNP19993    | <i>Kabuli</i>    | Ca_Kabuli_denovo             | 11539912                       | (A/G)       |
| 19994       | CakSNP19994    | <i>Kabuli</i>    | Ca_Kabuli_denovo             | 11539928                       | (C/A)       |
| 19995       | CakSNP19995    | <i>Kabuli</i>    | Ca_Kabuli_denovo             | 11543736                       | (G/A)       |
| 19996       | CakSNP19996    | <i>Kabuli</i>    | Ca_Kabuli_denovo             | 11546270                       | (G/A)       |
| 19997       | CakSNP19997    | <i>Kabuli</i>    | Ca_Kabuli_denovo             | 11546282                       | (G/A)       |
| 19998       | CakSNP19998    | <i>Kabuli</i>    | Ca_Kabuli_denovo             | 11560747                       | (A/T)       |
| 19999       | CakSNP19999    | <i>Kabuli</i>    | Ca_Kabuli_denovo             | 11560777                       | (T/A)       |
| 20000       | CakSNP20000    | <i>Kabuli</i>    | Ca_Kabuli_denovo             | 11562092                       | (A/C)       |
| 20001       | CakSNP20001    | <i>Kabuli</i>    | Ca_Kabuli_denovo             | 11566483                       | (T/C)       |
| 20002       | CakSNP20002    | <i>Kabuli</i>    | Ca_Kabuli_denovo             | 11570439                       | (G/C)       |
| 20003       | CakSNP20003    | <i>Kabuli</i>    | Ca_Kabuli_denovo             | 11571669                       | (C/T)       |
| 20004       | CakSNP20004    | <i>Kabuli</i>    | Ca_Kabuli_denovo             | 11571683                       | (C/T)       |
| 20005       | CakSNP20005    | <i>Kabuli</i>    | Ca_Kabuli_denovo             | 11572107                       | (C/T)       |
| 20006       | CakSNP20006    | <i>Kabuli</i>    | Ca_Kabuli_denovo             | 11576597                       | (G/A)       |
| 20007       | CakSNP20007    | <i>Kabuli</i>    | Ca_Kabuli_denovo             | 11582680                       | (A/G)       |
| 20008       | CakSNP20008    | <i>Kabuli</i>    | Ca_Kabuli_denovo             | 11584675                       | (A/G)       |
| 20009       | CakSNP20009    | <i>Kabuli</i>    | Ca_Kabuli_denovo             | 11594624                       | (T/C)       |
| 20010       | CakSNP20010    | <i>Kabuli</i>    | Ca_Kabuli_denovo             | 11596364                       | (G/A)       |
| 20011       | CakSNP20011    | <i>Kabuli</i>    | Ca_Kabuli_denovo             | 11596442                       | (A/G)       |
| 20012       | CakSNP20012    | <i>Kabuli</i>    | Ca_Kabuli_denovo             | 11597952                       | (C/T)       |
| 20013       | CakSNP20013    | <i>Kabuli</i>    | Ca_Kabuli_denovo             | 11597994                       | (A/G)       |
| 20014       | CakSNP20014    | <i>Kabuli</i>    | Ca_Kabuli_denovo             | 11601006                       | (G/T)       |
| 20015       | CakSNP20015    | <i>Kabuli</i>    | Ca_Kabuli_denovo             | 11602335                       | (G/C)       |
| 20016       | CakSNP20016    | <i>Kabuli</i>    | Ca_Kabuli_denovo             | 11602781                       | (C/G)       |
| 20017       | CakSNP20017    | <i>Kabuli</i>    | Ca_Kabuli_denovo             | 11603266                       | (T/A)       |
| 20018       | CakSNP20018    | <i>Kabuli</i>    | Ca_Kabuli_denovo             | 11621388                       | (A/G)       |
| 20019       | CakSNP20019    | <i>Kabuli</i>    | Ca_Kabuli_denovo             | 11622352                       | (G/C)       |
| 20020       | CakSNP20020    | <i>Kabuli</i>    | Ca_Kabuli_denovo             | 11622365                       | (A/T)       |
| 20021       | CakSNP20021    | <i>Kabuli</i>    | Ca_Kabuli_denovo             | 11628118                       | (T/C)       |
| 20022       | CakSNP20022    | <i>Kabuli</i>    | Ca_Kabuli_denovo             | 11628136                       | (A/C)       |
| 20023       | CakSNP20023    | <i>Kabuli</i>    | Ca_Kabuli_denovo             | 11629142                       | (G/C)       |
| 20024       | CakSNP20024    | <i>Kabuli</i>    | Ca_Kabuli_denovo             | 11629160                       | (T/G)       |
| 20025       | CakSNP20025    | <i>Kabuli</i>    | Ca_Kabuli_denovo             | 11632641                       | (T/G)       |

| <b>S.N.</b> | <b>SNP IDs</b> | <b>Cultivars</b> | <b>Chromosomes/scaffolds</b> | <b>Physical positions (bp)</b> | <b>SNPs</b> |
|-------------|----------------|------------------|------------------------------|--------------------------------|-------------|
| 20026       | CakSNP20026    | <i>Kabuli</i>    | Ca_Kabuli_denovo             | 11632708                       | (T/C)       |
| 20027       | CakSNP20027    | <i>Kabuli</i>    | Ca_Kabuli_denovo             | 11633909                       | (A/G)       |
| 20028       | CakSNP20028    | <i>Kabuli</i>    | Ca_Kabuli_denovo             | 11635456                       | (T/C)       |
| 20029       | CakSNP20029    | <i>Kabuli</i>    | Ca_Kabuli_denovo             | 11635493                       | (G/C)       |
| 20030       | CakSNP20030    | <i>Kabuli</i>    | Ca_Kabuli_denovo             | 11637531                       | (C/T)       |
| 20031       | CakSNP20031    | <i>Kabuli</i>    | Ca_Kabuli_denovo             | 11647295                       | (G/A)       |
| 20032       | CakSNP20032    | <i>Kabuli</i>    | Ca_Kabuli_denovo             | 11647988                       | (A/G)       |
| 20033       | CakSNP20033    | <i>Kabuli</i>    | Ca_Kabuli_denovo             | 11653902                       | (C/A)       |
| 20034       | CakSNP20034    | <i>Kabuli</i>    | Ca_Kabuli_denovo             | 11654696                       | (G/T)       |
| 20035       | CakSNP20035    | <i>Kabuli</i>    | Ca_Kabuli_denovo             | 11654699                       | (G/A)       |
| 20036       | CakSNP20036    | <i>Kabuli</i>    | Ca_Kabuli_denovo             | 11657390                       | (G/A)       |
| 20037       | CakSNP20037    | <i>Kabuli</i>    | Ca_Kabuli_denovo             | 11657404                       | (G/A)       |
| 20038       | CakSNP20038    | <i>Kabuli</i>    | Ca_Kabuli_denovo             | 11657818                       | (C/T)       |
| 20039       | CakSNP20039    | <i>Kabuli</i>    | Ca_Kabuli_denovo             | 11657827                       | (C/G)       |
| 20040       | CakSNP20040    | <i>Kabuli</i>    | Ca_Kabuli_denovo             | 11658673                       | (G/C)       |
| 20041       | CakSNP20041    | <i>Kabuli</i>    | Ca_Kabuli_denovo             | 11658712                       | (G/T)       |
| 20042       | CakSNP20042    | <i>Kabuli</i>    | Ca_Kabuli_denovo             | 11658756                       | (C/G)       |
| 20043       | CakSNP20043    | <i>Kabuli</i>    | Ca_Kabuli_denovo             | 11659710                       | (C/G)       |
| 20044       | CakSNP20044    | <i>Kabuli</i>    | Ca_Kabuli_denovo             | 11663334                       | (T/C)       |
| 20045       | CakSNP20045    | <i>Kabuli</i>    | Ca_Kabuli_denovo             | 11665747                       | (C/T)       |
| 20046       | CakSNP20046    | <i>Kabuli</i>    | Ca_Kabuli_denovo             | 11672834                       | (T/C)       |
| 20047       | CakSNP20047    | <i>Kabuli</i>    | Ca_Kabuli_denovo             | 11672842                       | (G/A)       |
| 20048       | CakSNP20048    | <i>Kabuli</i>    | Ca_Kabuli_denovo             | 11676813                       | (G/C)       |
| 20049       | CakSNP20049    | <i>Kabuli</i>    | Ca_Kabuli_denovo             | 11677203                       | (G/T)       |
| 20050       | CakSNP20050    | <i>Kabuli</i>    | Ca_Kabuli_denovo             | 11677211                       | (C/T)       |
| 20051       | CakSNP20051    | <i>Kabuli</i>    | Ca_Kabuli_denovo             | 11677396                       | (A/G)       |
| 20052       | CakSNP20052    | <i>Kabuli</i>    | Ca_Kabuli_denovo             | 11678405                       | (A/G)       |
| 20053       | CakSNP20053    | <i>Kabuli</i>    | Ca_Kabuli_denovo             | 11681261                       | (C/A)       |
| 20054       | CakSNP20054    | <i>Kabuli</i>    | Ca_Kabuli_denovo             | 11681262                       | (T/G)       |
| 20055       | CakSNP20055    | <i>Kabuli</i>    | Ca_Kabuli_denovo             | 11691933                       | (A/G)       |
| 20056       | CakSNP20056    | <i>Kabuli</i>    | Ca_Kabuli_denovo             | 11691993                       | (C/A)       |
| 20057       | CakSNP20057    | <i>Kabuli</i>    | Ca_Kabuli_denovo             | 11700734                       | (G/A)       |
| 20058       | CakSNP20058    | <i>Kabuli</i>    | Ca_Kabuli_denovo             | 11705216                       | (A/C)       |
| 20059       | CakSNP20059    | <i>Kabuli</i>    | Ca_Kabuli_denovo             | 11705234                       | (G/A)       |
| 20060       | CakSNP20060    | <i>Kabuli</i>    | Ca_Kabuli_denovo             | 11718358                       | (T/G)       |
| 20061       | CakSNP20061    | <i>Kabuli</i>    | Ca_Kabuli_denovo             | 11727596                       | (A/G)       |
| 20062       | CakSNP20062    | <i>Kabuli</i>    | Ca_Kabuli_denovo             | 11729357                       | (A/T)       |
| 20063       | CakSNP20063    | <i>Kabuli</i>    | Ca_Kabuli_denovo             | 11729711                       | (C/A)       |

| <b>S.N.</b> | <b>SNP IDs</b> | <b>Cultivars</b> | <b>Chromosomes/scaffolds</b> | <b>Physical positions (bp)</b> | <b>SNPs</b> |
|-------------|----------------|------------------|------------------------------|--------------------------------|-------------|
| 20064       | CakSNP20064    | <i>Kabuli</i>    | Ca_Kabuli_denovo             | 11731601                       | (C/T)       |
| 20065       | CakSNP20065    | <i>Kabuli</i>    | Ca_Kabuli_denovo             | 11732939                       | (G/A)       |
| 20066       | CakSNP20066    | <i>Kabuli</i>    | Ca_Kabuli_denovo             | 11751802                       | (T/C)       |
| 20067       | CakSNP20067    | <i>Kabuli</i>    | Ca_Kabuli_denovo             | 11751841                       | (C/T)       |
| 20068       | CakSNP20068    | <i>Kabuli</i>    | Ca_Kabuli_denovo             | 11756035                       | (G/T)       |
| 20069       | CakSNP20069    | <i>Kabuli</i>    | Ca_Kabuli_denovo             | 11757946                       | (C/T)       |
| 20070       | CakSNP20070    | <i>Kabuli</i>    | Ca_Kabuli_denovo             | 11758845                       | (C/T)       |
| 20071       | CakSNP20071    | <i>Kabuli</i>    | Ca_Kabuli_denovo             | 11758846                       | (G/A)       |
| 20072       | CakSNP20072    | <i>Kabuli</i>    | Ca_Kabuli_denovo             | 11765477                       | (T/A)       |
| 20073       | CakSNP20073    | <i>Kabuli</i>    | Ca_Kabuli_denovo             | 11767720                       | (T/C)       |
| 20074       | CakSNP20074    | <i>Kabuli</i>    | Ca_Kabuli_denovo             | 11767747                       | (C/G)       |
| 20075       | CakSNP20075    | <i>Kabuli</i>    | Ca_Kabuli_denovo             | 11773745                       | (C/G)       |
| 20076       | CakSNP20076    | <i>Kabuli</i>    | Ca_Kabuli_denovo             | 11777816                       | (G/C)       |
| 20077       | CakSNP20077    | <i>Kabuli</i>    | Ca_Kabuli_denovo             | 11785619                       | (G/A)       |
| 20078       | CakSNP20078    | <i>Kabuli</i>    | Ca_Kabuli_denovo             | 11785637                       | (C/G)       |
| 20079       | CakSNP20079    | <i>Kabuli</i>    | Ca_Kabuli_denovo             | 11789993                       | (G/T)       |
| 20080       | CakSNP20080    | <i>Kabuli</i>    | Ca_Kabuli_denovo             | 11789999                       | (A/C)       |
| 20081       | CakSNP20081    | <i>Kabuli</i>    | Ca_Kabuli_denovo             | 11792609                       | (C/T)       |
| 20082       | CakSNP20082    | <i>Kabuli</i>    | Ca_Kabuli_denovo             | 11792678                       | (A/C)       |
| 20083       | CakSNP20083    | <i>Kabuli</i>    | Ca_Kabuli_denovo             | 11792680                       | (A/T)       |
| 20084       | CakSNP20084    | <i>Kabuli</i>    | Ca_Kabuli_denovo             | 11797038                       | (T/C)       |
| 20085       | CakSNP20085    | <i>Kabuli</i>    | Ca_Kabuli_denovo             | 11797045                       | (C/A)       |
| 20086       | CakSNP20086    | <i>Kabuli</i>    | Ca_Kabuli_denovo             | 11797720                       | (C/T)       |
| 20087       | CakSNP20087    | <i>Kabuli</i>    | Ca_Kabuli_denovo             | 11798474                       | (A/G)       |
| 20088       | CakSNP20088    | <i>Kabuli</i>    | Ca_Kabuli_denovo             | 11800425                       | (C/T)       |
| 20089       | CakSNP20089    | <i>Kabuli</i>    | Ca_Kabuli_denovo             | 11800433                       | (C/A)       |
| 20090       | CakSNP20090    | <i>Kabuli</i>    | Ca_Kabuli_denovo             | 11801910                       | (G/C)       |
| 20091       | CakSNP20091    | <i>Kabuli</i>    | Ca_Kabuli_denovo             | 11801949                       | (A/G)       |
| 20092       | CakSNP20092    | <i>Kabuli</i>    | Ca_Kabuli_denovo             | 11801959                       | (C/G)       |
| 20093       | CakSNP20093    | <i>Kabuli</i>    | Ca_Kabuli_denovo             | 11813358                       | (T/C)       |
| 20094       | CakSNP20094    | <i>Kabuli</i>    | Ca_Kabuli_denovo             | 11813400                       | (T/A)       |
| 20095       | CakSNP20095    | <i>Kabuli</i>    | Ca_Kabuli_denovo             | 11818388                       | (C/G)       |
| 20096       | CakSNP20096    | <i>Kabuli</i>    | Ca_Kabuli_denovo             | 11818997                       | (A/C)       |
| 20097       | CakSNP20097    | <i>Kabuli</i>    | Ca_Kabuli_denovo             | 11818999                       | (A/C)       |
| 20098       | CakSNP20098    | <i>Kabuli</i>    | Ca_Kabuli_denovo             | 11821809                       | (C/T)       |
| 20099       | CakSNP20099    | <i>Kabuli</i>    | Ca_Kabuli_denovo             | 11826617                       | (G/T)       |
| 20100       | CakSNP20100    | <i>Kabuli</i>    | Ca_Kabuli_denovo             | 11826835                       | (C/T)       |
| 20101       | CakSNP20101    | <i>Kabuli</i>    | Ca_Kabuli_denovo             | 11826865                       | (T/C)       |

| <b>S.N.</b> | <b>SNP IDs</b> | <b>Cultivars</b> | <b>Chromosomes/scaffolds</b> | <b>Physical positions (bp)</b> | <b>SNPs</b> |
|-------------|----------------|------------------|------------------------------|--------------------------------|-------------|
| 20102       | CakSNP20102    | <i>Kabuli</i>    | Ca_Kabuli_denovo             | 11828227                       | (C/A)       |
| 20103       | CakSNP20103    | <i>Kabuli</i>    | Ca_Kabuli_denovo             | 11832922                       | (A/G)       |
| 20104       | CakSNP20104    | <i>Kabuli</i>    | Ca_Kabuli_denovo             | 11836267                       | (T/C)       |
| 20105       | CakSNP20105    | <i>Kabuli</i>    | Ca_Kabuli_denovo             | 11836286                       | (C/T)       |
| 20106       | CakSNP20106    | <i>Kabuli</i>    | Ca_Kabuli_denovo             | 11839483                       | (T/C)       |
| 20107       | CakSNP20107    | <i>Kabuli</i>    | Ca_Kabuli_denovo             | 11841284                       | (A/G)       |
| 20108       | CakSNP20108    | <i>Kabuli</i>    | Ca_Kabuli_denovo             | 11842163                       | (T/C)       |
| 20109       | CakSNP20109    | <i>Kabuli</i>    | Ca_Kabuli_denovo             | 11842187                       | (T/C)       |
| 20110       | CakSNP20110    | <i>Kabuli</i>    | Ca_Kabuli_denovo             | 11844115                       | (G/C)       |
| 20111       | CakSNP20111    | <i>Kabuli</i>    | Ca_Kabuli_denovo             | 11848053                       | (T/C)       |
| 20112       | CakSNP20112    | <i>Kabuli</i>    | Ca_Kabuli_denovo             | 11850589                       | (C/G)       |
| 20113       | CakSNP20113    | <i>Kabuli</i>    | Ca_Kabuli_denovo             | 11851324                       | (T/C)       |
| 20114       | CakSNP20114    | <i>Kabuli</i>    | Ca_Kabuli_denovo             | 11851331                       | (G/A)       |
| 20115       | CakSNP20115    | <i>Kabuli</i>    | Ca_Kabuli_denovo             | 11853095                       | (T/A)       |
| 20116       | CakSNP20116    | <i>Kabuli</i>    | Ca_Kabuli_denovo             | 11855554                       | (A/G)       |
| 20117       | CakSNP20117    | <i>Kabuli</i>    | Ca_Kabuli_denovo             | 11855592                       | (A/T)       |
| 20118       | CakSNP20118    | <i>Kabuli</i>    | Ca_Kabuli_denovo             | 11857112                       | (A/G)       |
| 20119       | CakSNP20119    | <i>Kabuli</i>    | Ca_Kabuli_denovo             | 11858823                       | (C/G)       |
| 20120       | CakSNP20120    | <i>Kabuli</i>    | Ca_Kabuli_denovo             | 11858841                       | (C/T)       |
| 20121       | CakSNP20121    | <i>Kabuli</i>    | Ca_Kabuli_denovo             | 11867607                       | (G/A)       |
| 20122       | CakSNP20122    | <i>Kabuli</i>    | Ca_Kabuli_denovo             | 11868238                       | (A/G)       |
| 20123       | CakSNP20123    | <i>Kabuli</i>    | Ca_Kabuli_denovo             | 11868277                       | (C/T)       |
| 20124       | CakSNP20124    | <i>Kabuli</i>    | Ca_Kabuli_denovo             | 11870258                       | (T/C)       |
| 20125       | CakSNP20125    | <i>Kabuli</i>    | Ca_Kabuli_denovo             | 11879386                       | (A/C)       |
| 20126       | CakSNP20126    | <i>Kabuli</i>    | Ca_Kabuli_denovo             | 11879392                       | (T/C)       |
| 20127       | CakSNP20127    | <i>Kabuli</i>    | Ca_Kabuli_denovo             | 11887761                       | (T/C)       |
| 20128       | CakSNP20128    | <i>Kabuli</i>    | Ca_Kabuli_denovo             | 11887771                       | (T/C)       |
| 20129       | CakSNP20129    | <i>Kabuli</i>    | Ca_Kabuli_denovo             | 11888785                       | (T/C)       |
| 20130       | CakSNP20130    | <i>Kabuli</i>    | Ca_Kabuli_denovo             | 11888809                       | (T/C)       |
| 20131       | CakSNP20131    | <i>Kabuli</i>    | Ca_Kabuli_denovo             | 11901103                       | (A/T)       |
| 20132       | CakSNP20132    | <i>Kabuli</i>    | Ca_Kabuli_denovo             | 11904032                       | (G/T)       |
| 20133       | CakSNP20133    | <i>Kabuli</i>    | Ca_Kabuli_denovo             | 11905598                       | (T/A)       |
| 20134       | CakSNP20134    | <i>Kabuli</i>    | Ca_Kabuli_denovo             | 11905613                       | (C/G)       |
| 20135       | CakSNP20135    | <i>Kabuli</i>    | Ca_Kabuli_denovo             | 11909810                       | (G/C)       |
| 20136       | CakSNP20136    | <i>Kabuli</i>    | Ca_Kabuli_denovo             | 11913469                       | (A/G)       |
| 20137       | CakSNP20137    | <i>Kabuli</i>    | Ca_Kabuli_denovo             | 11917788                       | (G/C)       |
| 20138       | CakSNP20138    | <i>Kabuli</i>    | Ca_Kabuli_denovo             | 11918472                       | (T/C)       |
| 20139       | CakSNP20139    | <i>Kabuli</i>    | Ca_Kabuli_denovo             | 11921650                       | (T/C)       |

| <b>S.N.</b> | <b>SNP IDs</b> | <b>Cultivars</b> | <b>Chromosomes/scaffolds</b> | <b>Physical positions (bp)</b> | <b>SNPs</b> |
|-------------|----------------|------------------|------------------------------|--------------------------------|-------------|
| 20140       | CakSNP20140    | <i>Kabuli</i>    | Ca_Kabuli_denovo             | 11921653                       | (C/T)       |
| 20141       | CakSNP20141    | <i>Kabuli</i>    | Ca_Kabuli_denovo             | 11926343                       | (G/A)       |
| 20142       | CakSNP20142    | <i>Kabuli</i>    | Ca_Kabuli_denovo             | 11926414                       | (C/G)       |
| 20143       | CakSNP20143    | <i>Kabuli</i>    | Ca_Kabuli_denovo             | 11928286                       | (C/G)       |
| 20144       | CakSNP20144    | <i>Kabuli</i>    | Ca_Kabuli_denovo             | 11928288                       | (A/G)       |
| 20145       | CakSNP20145    | <i>Kabuli</i>    | Ca_Kabuli_denovo             | 11932767                       | (C/T)       |
| 20146       | CakSNP20146    | <i>Kabuli</i>    | Ca_Kabuli_denovo             | 11933776                       | (T/C)       |
| 20147       | CakSNP20147    | <i>Kabuli</i>    | Ca_Kabuli_denovo             | 11933779                       | (T/C)       |
| 20148       | CakSNP20148    | <i>Kabuli</i>    | Ca_Kabuli_denovo             | 11934806                       | (A/G)       |
| 20149       | CakSNP20149    | <i>Kabuli</i>    | Ca_Kabuli_denovo             | 11934835                       | (C/T)       |
| 20150       | CakSNP20150    | <i>Kabuli</i>    | Ca_Kabuli_denovo             | 11935833                       | (C/T)       |
| 20151       | CakSNP20151    | <i>Kabuli</i>    | Ca_Kabuli_denovo             | 11936229                       | (A/T)       |
| 20152       | CakSNP20152    | <i>Kabuli</i>    | Ca_Kabuli_denovo             | 11937312                       | (A/G)       |
| 20153       | CakSNP20153    | <i>Kabuli</i>    | Ca_Kabuli_denovo             | 11937322                       | (A/C)       |
| 20154       | CakSNP20154    | <i>Kabuli</i>    | Ca_Kabuli_denovo             | 11937520                       | (G/T)       |
| 20155       | CakSNP20155    | <i>Kabuli</i>    | Ca_Kabuli_denovo             | 11941139                       | (A/G)       |
| 20156       | CakSNP20156    | <i>Kabuli</i>    | Ca_Kabuli_denovo             | 11942242                       | (T/A)       |
| 20157       | CakSNP20157    | <i>Kabuli</i>    | Ca_Kabuli_denovo             | 11942299                       | (C/T)       |
| 20158       | CakSNP20158    | <i>Kabuli</i>    | Ca_Kabuli_denovo             | 11947730                       | (T/A)       |
| 20159       | CakSNP20159    | <i>Kabuli</i>    | Ca_Kabuli_denovo             | 11953049                       | (C/G)       |
| 20160       | CakSNP20160    | <i>Kabuli</i>    | Ca_Kabuli_denovo             | 11962838                       | (A/G)       |
| 20161       | CakSNP20161    | <i>Kabuli</i>    | Ca_Kabuli_denovo             | 11962840                       | (G/A)       |
| 20162       | CakSNP20162    | <i>Kabuli</i>    | Ca_Kabuli_denovo             | 11965507                       | (A/G)       |
| 20163       | CakSNP20163    | <i>Kabuli</i>    | Ca_Kabuli_denovo             | 11965510                       | (G/A)       |
| 20164       | CakSNP20164    | <i>Kabuli</i>    | Ca_Kabuli_denovo             | 11970885                       | (C/G)       |
| 20165       | CakSNP20165    | <i>Kabuli</i>    | Ca_Kabuli_denovo             | 11976757                       | (C/G)       |
| 20166       | CakSNP20166    | <i>Kabuli</i>    | Ca_Kabuli_denovo             | 11983367                       | (T/C)       |
| 20167       | CakSNP20167    | <i>Kabuli</i>    | Ca_Kabuli_denovo             | 11983391                       | (C/A)       |
| 20168       | CakSNP20168    | <i>Kabuli</i>    | Ca_Kabuli_denovo             | 11986506                       | (G/A)       |
| 20169       | CakSNP20169    | <i>Kabuli</i>    | Ca_Kabuli_denovo             | 11986536                       | (A/G)       |
| 20170       | CakSNP20170    | <i>Kabuli</i>    | Ca_Kabuli_denovo             | 11986557                       | (A/G)       |
| 20171       | CakSNP20171    | <i>Kabuli</i>    | Ca_Kabuli_denovo             | 11987561                       | (G/C)       |
| 20172       | CakSNP20172    | <i>Kabuli</i>    | Ca_Kabuli_denovo             | 11993728                       | (G/A)       |
| 20173       | CakSNP20173    | <i>Kabuli</i>    | Ca_Kabuli_denovo             | 12005056                       | (T/C)       |
| 20174       | CakSNP20174    | <i>Kabuli</i>    | Ca_Kabuli_denovo             | 12008099                       | (T/C)       |
| 20175       | CakSNP20175    | <i>Kabuli</i>    | Ca_Kabuli_denovo             | 12008111                       | (T/C)       |
| 20176       | CakSNP20176    | <i>Kabuli</i>    | Ca_Kabuli_denovo             | 12010534                       | (A/T)       |
| 20177       | CakSNP20177    | <i>Kabuli</i>    | Ca_Kabuli_denovo             | 12018239                       | (A/G)       |

| <b>S.N.</b> | <b>SNP IDs</b> | <b>Cultivars</b> | <b>Chromosomes/scaffolds</b> | <b>Physical positions (bp)</b> | <b>SNPs</b> |
|-------------|----------------|------------------|------------------------------|--------------------------------|-------------|
| 20178       | CakSNP20178    | <i>Kabuli</i>    | Ca_Kabuli_denovo             | 12019804                       | (C/T)       |
| 20179       | CakSNP20179    | <i>Kabuli</i>    | Ca_Kabuli_denovo             | 12024854                       | (T/G)       |
| 20180       | CakSNP20180    | <i>Kabuli</i>    | Ca_Kabuli_denovo             | 12027996                       | (C/G)       |
| 20181       | CakSNP20181    | <i>Kabuli</i>    | Ca_Kabuli_denovo             | 12028061                       | (A/G)       |
| 20182       | CakSNP20182    | <i>Kabuli</i>    | Ca_Kabuli_denovo             | 12033965                       | (G/A)       |
| 20183       | CakSNP20183    | <i>Kabuli</i>    | Ca_Kabuli_denovo             | 12033971                       | (C/T)       |
| 20184       | CakSNP20184    | <i>Kabuli</i>    | Ca_Kabuli_denovo             | 12036188                       | (A/G)       |
| 20185       | CakSNP20185    | <i>Kabuli</i>    | Ca_Kabuli_denovo             | 12036224                       | (T/A)       |
| 20186       | CakSNP20186    | <i>Kabuli</i>    | Ca_Kabuli_denovo             | 12037582                       | (A/G)       |
| 20187       | CakSNP20187    | <i>Kabuli</i>    | Ca_Kabuli_denovo             | 12037583                       | (T/C)       |
| 20188       | CakSNP20188    | <i>Kabuli</i>    | Ca_Kabuli_denovo             | 12041729                       | (T/G)       |
| 20189       | CakSNP20189    | <i>Kabuli</i>    | Ca_Kabuli_denovo             | 12049740                       | (G/A)       |
| 20190       | CakSNP20190    | <i>Kabuli</i>    | Ca_Kabuli_denovo             | 12054052                       | (T/G)       |
| 20191       | CakSNP20191    | <i>Kabuli</i>    | Ca_Kabuli_denovo             | 12063452                       | (G/A)       |
| 20192       | CakSNP20192    | <i>Kabuli</i>    | Ca_Kabuli_denovo             | 12063460                       | (C/T)       |
| 20193       | CakSNP20193    | <i>Kabuli</i>    | Ca_Kabuli_denovo             | 12065643                       | (T/G)       |
| 20194       | CakSNP20194    | <i>Kabuli</i>    | Ca_Kabuli_denovo             | 12066145                       | (T/C)       |
| 20195       | CakSNP20195    | <i>Kabuli</i>    | Ca_Kabuli_denovo             | 12075499                       | (A/T)       |
| 20196       | CakSNP20196    | <i>Kabuli</i>    | Ca_Kabuli_denovo             | 12075514                       | (A/T)       |
| 20197       | CakSNP20197    | <i>Kabuli</i>    | Ca_Kabuli_denovo             | 12075516                       | (C/G)       |
| 20198       | CakSNP20198    | <i>Kabuli</i>    | Ca_Kabuli_denovo             | 12075524                       | (C/G)       |
| 20199       | CakSNP20199    | <i>Kabuli</i>    | Ca_Kabuli_denovo             | 12076633                       | (T/C)       |
| 20200       | CakSNP20200    | <i>Kabuli</i>    | Ca_Kabuli_denovo             | 12076636                       | (A/G)       |
| 20201       | CakSNP20201    | <i>Kabuli</i>    | Ca_Kabuli_denovo             | 12077380                       | (C/T)       |
| 20202       | CakSNP20202    | <i>Kabuli</i>    | Ca_Kabuli_denovo             | 12079082                       | (G/A)       |
| 20203       | CakSNP20203    | <i>Kabuli</i>    | Ca_Kabuli_denovo             | 12079352                       | (G/A)       |
| 20204       | CakSNP20204    | <i>Kabuli</i>    | Ca_Kabuli_denovo             | 12079358                       | (G/C)       |
| 20205       | CakSNP20205    | <i>Kabuli</i>    | Ca_Kabuli_denovo             | 12083899                       | (T/C)       |
| 20206       | CakSNP20206    | <i>Kabuli</i>    | Ca_Kabuli_denovo             | 12083908                       | (G/T)       |
| 20207       | CakSNP20207    | <i>Kabuli</i>    | Ca_Kabuli_denovo             | 12090488                       | (C/G)       |
| 20208       | CakSNP20208    | <i>Kabuli</i>    | Ca_Kabuli_denovo             | 12100423                       | (C/T)       |
| 20209       | CakSNP20209    | <i>Kabuli</i>    | Ca_Kabuli_denovo             | 12100504                       | (C/A)       |
| 20210       | CakSNP20210    | <i>Kabuli</i>    | Ca_Kabuli_denovo             | 12105637                       | (T/C)       |
| 20211       | CakSNP20211    | <i>Kabuli</i>    | Ca_Kabuli_denovo             | 12105669                       | (G/A)       |
| 20212       | CakSNP20212    | <i>Kabuli</i>    | Ca_Kabuli_denovo             | 12108912                       | (G/A)       |
| 20213       | CakSNP20213    | <i>Kabuli</i>    | Ca_Kabuli_denovo             | 12118782                       | (G/T)       |
| 20214       | CakSNP20214    | <i>Kabuli</i>    | Ca_Kabuli_denovo             | 12118820                       | (T/A)       |
| 20215       | CakSNP20215    | <i>Kabuli</i>    | Ca_Kabuli_denovo             | 12123015                       | (A/C)       |

| <b>S.N.</b> | <b>SNP IDs</b> | <b>Cultivars</b> | <b>Chromosomes/scaffolds</b> | <b>Physical positions (bp)</b> | <b>SNPs</b> |
|-------------|----------------|------------------|------------------------------|--------------------------------|-------------|
| 20216       | CakSNP20216    | <i>Kabuli</i>    | Ca_Kabuli_denovo             | 12123016                       | (G/C)       |
| 20217       | CakSNP20217    | <i>Kabuli</i>    | Ca_Kabuli_denovo             | 12128221                       | (A/C)       |
| 20218       | CakSNP20218    | <i>Kabuli</i>    | Ca_Kabuli_denovo             | 12129661                       | (T/C)       |
| 20219       | CakSNP20219    | <i>Kabuli</i>    | Ca_Kabuli_denovo             | 12132152                       | (C/T)       |
| 20220       | CakSNP20220    | <i>Kabuli</i>    | Ca_Kabuli_denovo             | 12140555                       | (C/T)       |
| 20221       | CakSNP20221    | <i>Kabuli</i>    | Ca_Kabuli_denovo             | 12140573                       | (C/A)       |
| 20222       | CakSNP20222    | <i>Kabuli</i>    | Ca_Kabuli_denovo             | 12141836                       | (G/A)       |
| 20223       | CakSNP20223    | <i>Kabuli</i>    | Ca_Kabuli_denovo             | 12142574                       | (A/G)       |
| 20224       | CakSNP20224    | <i>Kabuli</i>    | Ca_Kabuli_denovo             | 12151348                       | (A/G)       |
| 20225       | CakSNP20225    | <i>Kabuli</i>    | Ca_Kabuli_denovo             | 12151375                       | (A/G)       |
| 20226       | CakSNP20226    | <i>Kabuli</i>    | Ca_Kabuli_denovo             | 12157446                       | (T/G)       |
| 20227       | CakSNP20227    | <i>Kabuli</i>    | Ca_Kabuli_denovo             | 12157447                       | (T/A)       |
| 20228       | CakSNP20228    | <i>Kabuli</i>    | Ca_Kabuli_denovo             | 12157570                       | (G/A)       |
| 20229       | CakSNP20229    | <i>Kabuli</i>    | Ca_Kabuli_denovo             | 12160442                       | (T/G)       |
| 20230       | CakSNP20230    | <i>Kabuli</i>    | Ca_Kabuli_denovo             | 12160463                       | (C/T)       |
| 20231       | CakSNP20231    | <i>Kabuli</i>    | Ca_Kabuli_denovo             | 12160547                       | (T/C)       |
| 20232       | CakSNP20232    | <i>Kabuli</i>    | Ca_Kabuli_denovo             | 12160588                       | (A/G)       |
| 20233       | CakSNP20233    | <i>Kabuli</i>    | Ca_Kabuli_denovo             | 12161049                       | (A/C)       |
| 20234       | CakSNP20234    | <i>Kabuli</i>    | Ca_Kabuli_denovo             | 12163984                       | (G/C)       |
| 20235       | CakSNP20235    | <i>Kabuli</i>    | Ca_Kabuli_denovo             | 12170666                       | (T/C)       |
| 20236       | CakSNP20236    | <i>Kabuli</i>    | Ca_Kabuli_denovo             | 12174208                       | (C/G)       |
| 20237       | CakSNP20237    | <i>Kabuli</i>    | Ca_Kabuli_denovo             | 12178363                       | (A/G)       |
| 20238       | CakSNP20238    | <i>Kabuli</i>    | Ca_Kabuli_denovo             | 12181987                       | (G/A)       |
| 20239       | CakSNP20239    | <i>Kabuli</i>    | Ca_Kabuli_denovo             | 12182026                       | (C/G)       |
| 20240       | CakSNP20240    | <i>Kabuli</i>    | Ca_Kabuli_denovo             | 12186730                       | (T/C)       |
| 20241       | CakSNP20241    | <i>Kabuli</i>    | Ca_Kabuli_denovo             | 12186760                       | (C/G)       |
| 20242       | CakSNP20242    | <i>Kabuli</i>    | Ca_Kabuli_denovo             | 12187344                       | (A/G)       |
| 20243       | CakSNP20243    | <i>Kabuli</i>    | Ca_Kabuli_denovo             | 12192872                       | (C/T)       |
| 20244       | CakSNP20244    | <i>Kabuli</i>    | Ca_Kabuli_denovo             | 12201334                       | (A/G)       |
| 20245       | CakSNP20245    | <i>Kabuli</i>    | Ca_Kabuli_denovo             | 12202915                       | (A/G)       |
| 20246       | CakSNP20246    | <i>Kabuli</i>    | Ca_Kabuli_denovo             | 12209776                       | (T/C)       |
| 20247       | CakSNP20247    | <i>Kabuli</i>    | Ca_Kabuli_denovo             | 12215372                       | (G/T)       |
| 20248       | CakSNP20248    | <i>Kabuli</i>    | Ca_Kabuli_denovo             | 12216070                       | (C/T)       |
| 20249       | CakSNP20249    | <i>Kabuli</i>    | Ca_Kabuli_denovo             | 12217982                       | (G/A)       |
| 20250       | CakSNP20250    | <i>Kabuli</i>    | Ca_Kabuli_denovo             | 12234821                       | (C/T)       |
| 20251       | CakSNP20251    | <i>Kabuli</i>    | Ca_Kabuli_denovo             | 12236422                       | (T/C)       |
| 20252       | CakSNP20252    | <i>Kabuli</i>    | Ca_Kabuli_denovo             | 12239018                       | (C/G)       |
| 20253       | CakSNP20253    | <i>Kabuli</i>    | Ca_Kabuli_denovo             | 12240512                       | (A/G)       |

| <b>S.N.</b> | <b>SNP IDs</b> | <b>Cultivars</b> | <b>Chromosomes/scaffolds</b> | <b>Physical positions (bp)</b> | <b>SNPs</b> |
|-------------|----------------|------------------|------------------------------|--------------------------------|-------------|
| 20254       | CakSNP20254    | <i>Kabuli</i>    | Ca_Kabuli_denovo             | 12240549                       | (A/G)       |
| 20255       | CakSNP20255    | <i>Kabuli</i>    | Ca_Kabuli_denovo             | 12243380                       | (A/G)       |
| 20256       | CakSNP20256    | <i>Kabuli</i>    | Ca_Kabuli_denovo             | 12248626                       | (A/G)       |
| 20257       | CakSNP20257    | <i>Kabuli</i>    | Ca_Kabuli_denovo             | 12251127                       | (C/A)       |
| 20258       | CakSNP20258    | <i>Kabuli</i>    | Ca_Kabuli_denovo             | 12252623                       | (A/G)       |
| 20259       | CakSNP20259    | <i>Kabuli</i>    | Ca_Kabuli_denovo             | 12257991                       | (T/C)       |
| 20260       | CakSNP20260    | <i>Kabuli</i>    | Ca_Kabuli_denovo             | 12257993                       | (T/G)       |
| 20261       | CakSNP20261    | <i>Kabuli</i>    | Ca_Kabuli_denovo             | 12264308                       | (G/T)       |
| 20262       | CakSNP20262    | <i>Kabuli</i>    | Ca_Kabuli_denovo             | 12266786                       | (A/G)       |
| 20263       | CakSNP20263    | <i>Kabuli</i>    | Ca_Kabuli_denovo             | 12269505                       | (G/C)       |
| 20264       | CakSNP20264    | <i>Kabuli</i>    | Ca_Kabuli_denovo             | 12292363                       | (G/C)       |
| 20265       | CakSNP20265    | <i>Kabuli</i>    | Ca_Kabuli_denovo             | 12298060                       | (C/G)       |
| 20266       | CakSNP20266    | <i>Kabuli</i>    | Ca_Kabuli_denovo             | 12298745                       | (C/T)       |
| 20267       | CakSNP20267    | <i>Kabuli</i>    | Ca_Kabuli_denovo             | 12301582                       | (A/C)       |
| 20268       | CakSNP20268    | <i>Kabuli</i>    | Ca_Kabuli_denovo             | 12309140                       | (G/A)       |
| 20269       | CakSNP20269    | <i>Kabuli</i>    | Ca_Kabuli_denovo             | 12309148                       | (A/G)       |
| 20270       | CakSNP20270    | <i>Kabuli</i>    | Ca_Kabuli_denovo             | 12318085                       | (T/C)       |
| 20271       | CakSNP20271    | <i>Kabuli</i>    | Ca_Kabuli_denovo             | 12318112                       | (T/C)       |
| 20272       | CakSNP20272    | <i>Kabuli</i>    | Ca_Kabuli_denovo             | 12319732                       | (G/C)       |
| 20273       | CakSNP20273    | <i>Kabuli</i>    | Ca_Kabuli_denovo             | 12323652                       | (G/C)       |
| 20274       | CakSNP20274    | <i>Kabuli</i>    | Ca_Kabuli_denovo             | 12329986                       | (G/A)       |
| 20275       | CakSNP20275    | <i>Kabuli</i>    | Ca_Kabuli_denovo             | 12329992                       | (C/T)       |
| 20276       | CakSNP20276    | <i>Kabuli</i>    | Ca_Kabuli_denovo             | 12331347                       | (C/G)       |
| 20277       | CakSNP20277    | <i>Kabuli</i>    | Ca_Kabuli_denovo             | 12331761                       | (G/C)       |
| 20278       | CakSNP20278    | <i>Kabuli</i>    | Ca_Kabuli_denovo             | 12331775                       | (C/G)       |
| 20279       | CakSNP20279    | <i>Kabuli</i>    | Ca_Kabuli_denovo             | 12343528                       | (T/C)       |
| 20280       | CakSNP20280    | <i>Kabuli</i>    | Ca_Kabuli_denovo             | 12343563                       | (T/C)       |
| 20281       | CakSNP20281    | <i>Kabuli</i>    | Ca_Kabuli_denovo             | 12348038                       | (C/G)       |
| 20282       | CakSNP20282    | <i>Kabuli</i>    | Ca_Kabuli_denovo             | 12348044                       | (C/G)       |
| 20283       | CakSNP20283    | <i>Kabuli</i>    | Ca_Kabuli_denovo             | 12356015                       | (T/C)       |
| 20284       | CakSNP20284    | <i>Kabuli</i>    | Ca_Kabuli_denovo             | 12360701                       | (T/G)       |
| 20285       | CakSNP20285    | <i>Kabuli</i>    | Ca_Kabuli_denovo             | 12360722                       | (C/T)       |
| 20286       | CakSNP20286    | <i>Kabuli</i>    | Ca_Kabuli_denovo             | 12364826                       | (G/T)       |
| 20287       | CakSNP20287    | <i>Kabuli</i>    | Ca_Kabuli_denovo             | 12365459                       | (A/C)       |
| 20288       | CakSNP20288    | <i>Kabuli</i>    | Ca_Kabuli_denovo             | 12368369                       | (C/T)       |
| 20289       | CakSNP20289    | <i>Kabuli</i>    | Ca_Kabuli_denovo             | 12380551                       | (A/T)       |
| 20290       | CakSNP20290    | <i>Kabuli</i>    | Ca_Kabuli_denovo             | 12380579                       | (G/C)       |
| 20291       | CakSNP20291    | <i>Kabuli</i>    | Ca_Kabuli_denovo             | 12381201                       | (C/T)       |



| <b>S.N.</b> | <b>SNP IDs</b> | <b>Cultivars</b> | <b>Chromosomes/scaffolds</b> | <b>Physical positions (bp)</b> | <b>SNPs</b> |
|-------------|----------------|------------------|------------------------------|--------------------------------|-------------|
| 20292       | CakSNP20292    | <i>Kabuli</i>    | Ca_Kabuli_denovo             | 12381391                       | (C/T)       |
| 20293       | CakSNP20293    | <i>Kabuli</i>    | Ca_Kabuli_denovo             | 12385312                       | (G/C)       |
| 20294       | CakSNP20294    | <i>Kabuli</i>    | Ca_Kabuli_denovo             | 12385354                       | (A/C)       |
| 20295       | CakSNP20295    | <i>Kabuli</i>    | Ca_Kabuli_denovo             | 12386113                       | (C/G)       |
| 20296       | CakSNP20296    | <i>Kabuli</i>    | Ca_Kabuli_denovo             | 12387661                       | (C/A)       |
| 20297       | CakSNP20297    | <i>Kabuli</i>    | Ca_Kabuli_denovo             | 12387670                       | (T/C)       |
| 20298       | CakSNP20298    | <i>Kabuli</i>    | Ca_Kabuli_denovo             | 12391385                       | (G/A)       |
| 20299       | CakSNP20299    | <i>Kabuli</i>    | Ca_Kabuli_denovo             | 12391414                       | (G/A)       |
| 20300       | CakSNP20300    | <i>Kabuli</i>    | Ca_Kabuli_denovo             | 12394679                       | (T/C)       |
| 20301       | CakSNP20301    | <i>Kabuli</i>    | Ca_Kabuli_denovo             | 12394728                       | (G/C)       |
| 20302       | CakSNP20302    | <i>Kabuli</i>    | Ca_Kabuli_denovo             | 12394732                       | (C/T)       |
| 20303       | CakSNP20303    | <i>Kabuli</i>    | Ca_Kabuli_denovo             | 12404927                       | (A/G)       |
| 20304       | CakSNP20304    | <i>Kabuli</i>    | Ca_Kabuli_denovo             | 12411157                       | (C/G)       |
| 20305       | CakSNP20305    | <i>Kabuli</i>    | Ca_Kabuli_denovo             | 12415971                       | (C/T)       |
| 20306       | CakSNP20306    | <i>Kabuli</i>    | Ca_Kabuli_denovo             | 12417288                       | (C/A)       |
| 20307       | CakSNP20307    | <i>Kabuli</i>    | Ca_Kabuli_denovo             | 12417294                       | (G/C)       |
| 20308       | CakSNP20308    | <i>Kabuli</i>    | Ca_Kabuli_denovo             | 12420048                       | (G/C)       |
| 20309       | CakSNP20309    | <i>Kabuli</i>    | Ca_Kabuli_denovo             | 12422409                       | (C/G)       |
| 20310       | CakSNP20310    | <i>Kabuli</i>    | Ca_Kabuli_denovo             | 12422413                       | (A/C)       |
| 20311       | CakSNP20311    | <i>Kabuli</i>    | Ca_Kabuli_denovo             | 12424936                       | (C/T)       |
| 20312       | CakSNP20312    | <i>Kabuli</i>    | Ca_Kabuli_denovo             | 12424968                       | (A/T)       |
| 20313       | CakSNP20313    | <i>Kabuli</i>    | Ca_Kabuli_denovo             | 12431462                       | (C/T)       |
| 20314       | CakSNP20314    | <i>Kabuli</i>    | Ca_Kabuli_denovo             | 12440976                       | (C/T)       |
| 20315       | CakSNP20315    | <i>Kabuli</i>    | Ca_Kabuli_denovo             | 12449927                       | (T/C)       |
| 20316       | CakSNP20316    | <i>Kabuli</i>    | Ca_Kabuli_denovo             | 12449999                       | (C/T)       |
| 20317       | CakSNP20317    | <i>Kabuli</i>    | Ca_Kabuli_denovo             | 12450760                       | (A/G)       |
| 20318       | CakSNP20318    | <i>Kabuli</i>    | Ca_Kabuli_denovo             | 12450818                       | (G/C)       |
| 20319       | CakSNP20319    | <i>Kabuli</i>    | Ca_Kabuli_denovo             | 12450967                       | (C/T)       |
| 20320       | CakSNP20320    | <i>Kabuli</i>    | Ca_Kabuli_denovo             | 12450989                       | (A/G)       |
| 20321       | CakSNP20321    | <i>Kabuli</i>    | Ca_Kabuli_denovo             | 12467411                       | (A/G)       |
| 20322       | CakSNP20322    | <i>Kabuli</i>    | Ca_Kabuli_denovo             | 12468098                       | (C/G)       |
| 20323       | CakSNP20323    | <i>Kabuli</i>    | Ca_Kabuli_denovo             | 12471420                       | (T/C)       |
| 20324       | CakSNP20324    | <i>Kabuli</i>    | Ca_Kabuli_denovo             | 12472768                       | (G/A)       |
| 20325       | CakSNP20325    | <i>Kabuli</i>    | Ca_Kabuli_denovo             | 12473457                       | (A/G)       |
| 20326       | CakSNP20326    | <i>Kabuli</i>    | Ca_Kabuli_denovo             | 12484829                       | (T/G)       |
| 20327       | CakSNP20327    | <i>Kabuli</i>    | Ca_Kabuli_denovo             | 12485751                       | (A/G)       |
| 20328       | CakSNP20328    | <i>Kabuli</i>    | Ca_Kabuli_denovo             | 12485766                       | (C/T)       |
| 20329       | CakSNP20329    | <i>Kabuli</i>    | Ca_Kabuli_denovo             | 12486851                       | (A/G)       |

| <b>S.N.</b> | <b>SNP IDs</b> | <b>Cultivars</b> | <b>Chromosomes/scaffolds</b> | <b>Physical positions (bp)</b> | <b>SNPs</b> |
|-------------|----------------|------------------|------------------------------|--------------------------------|-------------|
| 20330       | CakSNP20330    | <i>Kabuli</i>    | Ca_Kabuli_denovo             | 12486854                       | (G/A)       |
| 20331       | CakSNP20331    | <i>Kabuli</i>    | Ca_Kabuli_denovo             | 12487619                       | (C/T)       |
| 20332       | CakSNP20332    | <i>Kabuli</i>    | Ca_Kabuli_denovo             | 12487668                       | (A/G)       |
| 20333       | CakSNP20333    | <i>Kabuli</i>    | Ca_Kabuli_denovo             | 12496808                       | (C/T)       |
| 20334       | CakSNP20334    | <i>Kabuli</i>    | Ca_Kabuli_denovo             | 12500463                       | (G/A)       |
| 20335       | CakSNP20335    | <i>Kabuli</i>    | Ca_Kabuli_denovo             | 12500466                       | (G/C)       |
| 20336       | CakSNP20336    | <i>Kabuli</i>    | Ca_Kabuli_denovo             | 12502746                       | (A/T)       |
| 20337       | CakSNP20337    | <i>Kabuli</i>    | Ca_Kabuli_denovo             | 12505149                       | (G/T)       |
| 20338       | CakSNP20338    | <i>Kabuli</i>    | Ca_Kabuli_denovo             | 12506116                       | (A/C)       |
| 20339       | CakSNP20339    | <i>Kabuli</i>    | Ca_Kabuli_denovo             | 12506158                       | (A/G)       |
| 20340       | CakSNP20340    | <i>Kabuli</i>    | Ca_Kabuli_denovo             | 12507925                       | (C/T)       |
| 20341       | CakSNP20341    | <i>Kabuli</i>    | Ca_Kabuli_denovo             | 12514887                       | (A/C)       |
| 20342       | CakSNP20342    | <i>Kabuli</i>    | Ca_Kabuli_denovo             | 12527488                       | (G/C)       |
| 20343       | CakSNP20343    | <i>Kabuli</i>    | Ca_Kabuli_denovo             | 12529187                       | (A/G)       |
| 20344       | CakSNP20344    | <i>Kabuli</i>    | Ca_Kabuli_denovo             | 12530009                       | (C/T)       |
| 20345       | CakSNP20345    | <i>Kabuli</i>    | Ca_Kabuli_denovo             | 12539987                       | (C/T)       |
| 20346       | CakSNP20346    | <i>Kabuli</i>    | Ca_Kabuli_denovo             | 12541576                       | (C/G)       |
| 20347       | CakSNP20347    | <i>Kabuli</i>    | Ca_Kabuli_denovo             | 12550942                       | (C/T)       |
| 20348       | CakSNP20348    | <i>Kabuli</i>    | Ca_Kabuli_denovo             | 12562412                       | (C/T)       |
| 20349       | CakSNP20349    | <i>Kabuli</i>    | Ca_Kabuli_denovo             | 12562414                       | (G/A)       |
| 20350       | CakSNP20350    | <i>Kabuli</i>    | Ca_Kabuli_denovo             | 12567144                       | (T/C)       |
| 20351       | CakSNP20351    | <i>Kabuli</i>    | Ca_Kabuli_denovo             | 12568213                       | (A/G)       |
| 20352       | CakSNP20352    | <i>Kabuli</i>    | Ca_Kabuli_denovo             | 12568222                       | (G/A)       |
| 20353       | CakSNP20353    | <i>Kabuli</i>    | Ca_Kabuli_denovo             | 12572669                       | (A/C)       |
| 20354       | CakSNP20354    | <i>Kabuli</i>    | Ca_Kabuli_denovo             | 12572691                       | (C/T)       |
| 20355       | CakSNP20355    | <i>Kabuli</i>    | Ca_Kabuli_denovo             | 12578294                       | (T/C)       |
| 20356       | CakSNP20356    | <i>Kabuli</i>    | Ca_Kabuli_denovo             | 12578300                       | (A/C)       |
| 20357       | CakSNP20357    | <i>Kabuli</i>    | Ca_Kabuli_denovo             | 12583593                       | (T/C)       |
| 20358       | CakSNP20358    | <i>Kabuli</i>    | Ca_Kabuli_denovo             | 12588224                       | (G/A)       |
| 20359       | CakSNP20359    | <i>Kabuli</i>    | Ca_Kabuli_denovo             | 12597602                       | (C/T)       |
| 20360       | CakSNP20360    | <i>Kabuli</i>    | Ca_Kabuli_denovo             | 12597680                       | (C/T)       |
| 20361       | CakSNP20361    | <i>Kabuli</i>    | Ca_Kabuli_denovo             | 12597698                       | (A/G)       |
| 20362       | CakSNP20362    | <i>Kabuli</i>    | Ca_Kabuli_denovo             | 12598854                       | (G/A)       |
| 20363       | CakSNP20363    | <i>Kabuli</i>    | Ca_Kabuli_denovo             | 12614448                       | (C/G)       |
| 20364       | CakSNP20364    | <i>Kabuli</i>    | Ca_Kabuli_denovo             | 12614475                       | (T/G)       |
| 20365       | CakSNP20365    | <i>Kabuli</i>    | Ca_Kabuli_denovo             | 12620203                       | (T/G)       |
| 20366       | CakSNP20366    | <i>Kabuli</i>    | Ca_Kabuli_denovo             | 12625088                       | (G/A)       |
| 20367       | CakSNP20367    | <i>Kabuli</i>    | Ca_Kabuli_denovo             | 12630071                       | (G/A)       |

| <b>S.N.</b> | <b>SNP IDs</b> | <b>Cultivars</b> | <b>Chromosomes/scaffolds</b> | <b>Physical positions (bp)</b> | <b>SNPs</b> |
|-------------|----------------|------------------|------------------------------|--------------------------------|-------------|
| 20368       | CakSNP20368    | <i>Kabuli</i>    | Ca_Kabuli_denovo             | 12630136                       | (C/G)       |
| 20369       | CakSNP20369    | <i>Kabuli</i>    | Ca_Kabuli_denovo             | 12647378                       | (C/G)       |
| 20370       | CakSNP20370    | <i>Kabuli</i>    | Ca_Kabuli_denovo             | 12647381                       | (C/T)       |
| 20371       | CakSNP20371    | <i>Kabuli</i>    | Ca_Kabuli_denovo             | 12649202                       | (G/C)       |
| 20372       | CakSNP20372    | <i>Kabuli</i>    | Ca_Kabuli_denovo             | 12649208                       | (G/A)       |
| 20373       | CakSNP20373    | <i>Kabuli</i>    | Ca_Kabuli_denovo             | 12655462                       | (A/C)       |
| 20374       | CakSNP20374    | <i>Kabuli</i>    | Ca_Kabuli_denovo             | 12655487                       | (A/C)       |
| 20375       | CakSNP20375    | <i>Kabuli</i>    | Ca_Kabuli_denovo             | 12669133                       | (G/A)       |
| 20376       | CakSNP20376    | <i>Kabuli</i>    | Ca_Kabuli_denovo             | 12672676                       | (T/C)       |
| 20377       | CakSNP20377    | <i>Kabuli</i>    | Ca_Kabuli_denovo             | 12680590                       | (T/G)       |
| 20378       | CakSNP20378    | <i>Kabuli</i>    | Ca_Kabuli_denovo             | 12680643                       | (T/C)       |
| 20379       | CakSNP20379    | <i>Kabuli</i>    | Ca_Kabuli_denovo             | 12681610                       | (G/T)       |
| 20380       | CakSNP20380    | <i>Kabuli</i>    | Ca_Kabuli_denovo             | 12683863                       | (C/A)       |
| 20381       | CakSNP20381    | <i>Kabuli</i>    | Ca_Kabuli_denovo             | 12684098                       | (A/G)       |
| 20382       | CakSNP20382    | <i>Kabuli</i>    | Ca_Kabuli_denovo             | 12684100                       | (C/T)       |
| 20383       | CakSNP20383    | <i>Kabuli</i>    | Ca_Kabuli_denovo             | 12686753                       | (A/G)       |
| 20384       | CakSNP20384    | <i>Kabuli</i>    | Ca_Kabuli_denovo             | 12686758                       | (C/A)       |
| 20385       | CakSNP20385    | <i>Kabuli</i>    | Ca_Kabuli_denovo             | 12688024                       | (C/T)       |
| 20386       | CakSNP20386    | <i>Kabuli</i>    | Ca_Kabuli_denovo             | 12688476                       | (G/C)       |
| 20387       | CakSNP20387    | <i>Kabuli</i>    | Ca_Kabuli_denovo             | 12688489                       | (G/T)       |
| 20388       | CakSNP20388    | <i>Kabuli</i>    | Ca_Kabuli_denovo             | 12689864                       | (G/A)       |
| 20389       | CakSNP20389    | <i>Kabuli</i>    | Ca_Kabuli_denovo             | 12689914                       | (C/T)       |
| 20390       | CakSNP20390    | <i>Kabuli</i>    | Ca_Kabuli_denovo             | 12691912                       | (C/A)       |
| 20391       | CakSNP20391    | <i>Kabuli</i>    | Ca_Kabuli_denovo             | 12691926                       | (C/G)       |
| 20392       | CakSNP20392    | <i>Kabuli</i>    | Ca_Kabuli_denovo             | 12692387                       | (A/G)       |
| 20393       | CakSNP20393    | <i>Kabuli</i>    | Ca_Kabuli_denovo             | 12701219                       | (C/T)       |
| 20394       | CakSNP20394    | <i>Kabuli</i>    | Ca_Kabuli_denovo             | 12701233                       | (A/G)       |
| 20395       | CakSNP20395    | <i>Kabuli</i>    | Ca_Kabuli_denovo             | 12701423                       | (G/A)       |
| 20396       | CakSNP20396    | <i>Kabuli</i>    | Ca_Kabuli_denovo             | 12711354                       | (C/G)       |
| 20397       | CakSNP20397    | <i>Kabuli</i>    | Ca_Kabuli_denovo             | 12711370                       | (T/C)       |
| 20398       | CakSNP20398    | <i>Kabuli</i>    | Ca_Kabuli_denovo             | 12711403                       | (G/C)       |
| 20399       | CakSNP20399    | <i>Kabuli</i>    | Ca_Kabuli_denovo             | 12712367                       | (A/G)       |
| 20400       | CakSNP20400    | <i>Kabuli</i>    | Ca_Kabuli_denovo             | 12712436                       | (A/G)       |
| 20401       | CakSNP20401    | <i>Kabuli</i>    | Ca_Kabuli_denovo             | 12712492                       | (C/G)       |
| 20402       | CakSNP20402    | <i>Kabuli</i>    | Ca_Kabuli_denovo             | 12719308                       | (C/T)       |
| 20403       | CakSNP20403    | <i>Kabuli</i>    | Ca_Kabuli_denovo             | 12728194                       | (C/A)       |
| 20404       | CakSNP20404    | <i>Kabuli</i>    | Ca_Kabuli_denovo             | 12728235                       | (C/G)       |
| 20405       | CakSNP20405    | <i>Kabuli</i>    | Ca_Kabuli_denovo             | 12728761                       | (G/C)       |

| <b>S.N.</b> | <b>SNP IDs</b> | <b>Cultivars</b> | <b>Chromosomes/scaffolds</b> | <b>Physical positions (bp)</b> | <b>SNPs</b> |
|-------------|----------------|------------------|------------------------------|--------------------------------|-------------|
| 20406       | CakSNP20406    | <i>Kabuli</i>    | Ca_Kabuli_denovo             | 12728774                       | (G/C)       |
| 20407       | CakSNP20407    | <i>Kabuli</i>    | Ca_Kabuli_denovo             | 12730181                       | (C/T)       |
| 20408       | CakSNP20408    | <i>Kabuli</i>    | Ca_Kabuli_denovo             | 12735810                       | (A/G)       |
| 20409       | CakSNP20409    | <i>Kabuli</i>    | Ca_Kabuli_denovo             | 12735840                       | (G/A)       |
| 20410       | CakSNP20410    | <i>Kabuli</i>    | Ca_Kabuli_denovo             | 12738518                       | (C/T)       |
| 20411       | CakSNP20411    | <i>Kabuli</i>    | Ca_Kabuli_denovo             | 12738520                       | (T/C)       |
| 20412       | CakSNP20412    | <i>Kabuli</i>    | Ca_Kabuli_denovo             | 12739001                       | (C/G)       |
| 20413       | CakSNP20413    | <i>Kabuli</i>    | Ca_Kabuli_denovo             | 12739011                       | (G/C)       |
| 20414       | CakSNP20414    | <i>Kabuli</i>    | Ca_Kabuli_denovo             | 12739895                       | (T/G)       |
| 20415       | CakSNP20415    | <i>Kabuli</i>    | Ca_Kabuli_denovo             | 12740080                       | (T/G)       |
| 20416       | CakSNP20416    | <i>Kabuli</i>    | Ca_Kabuli_denovo             | 12740138                       | (G/C)       |
| 20417       | CakSNP20417    | <i>Kabuli</i>    | Ca_Kabuli_denovo             | 12748520                       | (T/C)       |
| 20418       | CakSNP20418    | <i>Kabuli</i>    | Ca_Kabuli_denovo             | 12754598                       | (G/A)       |
| 20419       | CakSNP20419    | <i>Kabuli</i>    | Ca_Kabuli_denovo             | 12760788                       | (G/T)       |
| 20420       | CakSNP20420    | <i>Kabuli</i>    | Ca_Kabuli_denovo             | 12763262                       | (C/T)       |
| 20421       | CakSNP20421    | <i>Kabuli</i>    | Ca_Kabuli_denovo             | 12765002                       | (G/C)       |
| 20422       | CakSNP20422    | <i>Kabuli</i>    | Ca_Kabuli_denovo             | 12765006                       | (G/A)       |
| 20423       | CakSNP20423    | <i>Kabuli</i>    | Ca_Kabuli_denovo             | 12767039                       | (A/G)       |
| 20424       | CakSNP20424    | <i>Kabuli</i>    | Ca_Kabuli_denovo             | 12769214                       | (A/T)       |
| 20425       | CakSNP20425    | <i>Kabuli</i>    | Ca_Kabuli_denovo             | 12770684                       | (A/G)       |
| 20426       | CakSNP20426    | <i>Kabuli</i>    | Ca_Kabuli_denovo             | 12770747                       | (C/G)       |
| 20427       | CakSNP20427    | <i>Kabuli</i>    | Ca_Kabuli_denovo             | 12772557                       | (A/G)       |
| 20428       | CakSNP20428    | <i>Kabuli</i>    | Ca_Kabuli_denovo             | 12772584                       | (T/C)       |
| 20429       | CakSNP20429    | <i>Kabuli</i>    | Ca_Kabuli_denovo             | 12776581                       | (G/A)       |
| 20430       | CakSNP20430    | <i>Kabuli</i>    | Ca_Kabuli_denovo             | 12780073                       | (C/A)       |
| 20431       | CakSNP20431    | <i>Kabuli</i>    | Ca_Kabuli_denovo             | 12785221                       | (C/A)       |
| 20432       | CakSNP20432    | <i>Kabuli</i>    | Ca_Kabuli_denovo             | 12785230                       | (G/C)       |
| 20433       | CakSNP20433    | <i>Kabuli</i>    | Ca_Kabuli_denovo             | 12785482                       | (C/G)       |
| 20434       | CakSNP20434    | <i>Kabuli</i>    | Ca_Kabuli_denovo             | 12785515                       | (A/G)       |
| 20435       | CakSNP20435    | <i>Kabuli</i>    | Ca_Kabuli_denovo             | 12791066                       | (A/G)       |
| 20436       | CakSNP20436    | <i>Kabuli</i>    | Ca_Kabuli_denovo             | 12791067                       | (A/G)       |
| 20437       | CakSNP20437    | <i>Kabuli</i>    | Ca_Kabuli_denovo             | 12793473                       | (T/C)       |
| 20438       | CakSNP20438    | <i>Kabuli</i>    | Ca_Kabuli_denovo             | 12793863                       | (G/A)       |
| 20439       | CakSNP20439    | <i>Kabuli</i>    | Ca_Kabuli_denovo             | 12793884                       | (C/G)       |
| 20440       | CakSNP20440    | <i>Kabuli</i>    | Ca_Kabuli_denovo             | 12795878                       | (C/T)       |
| 20441       | CakSNP20441    | <i>Kabuli</i>    | Ca_Kabuli_denovo             | 12805396                       | (T/C)       |
| 20442       | CakSNP20442    | <i>Kabuli</i>    | Ca_Kabuli_denovo             | 12812076                       | (C/G)       |
| 20443       | CakSNP20443    | <i>Kabuli</i>    | Ca_Kabuli_denovo             | 12812111                       | (A/C)       |

| <b>S.N.</b> | <b>SNP IDs</b> | <b>Cultivars</b> | <b>Chromosomes/scaffolds</b> | <b>Physical positions (bp)</b> | <b>SNPs</b> |
|-------------|----------------|------------------|------------------------------|--------------------------------|-------------|
| 20444       | CakSNP20444    | <i>Kabuli</i>    | Ca_Kabuli_denovo             | 12817660                       | (C/T)       |
| 20445       | CakSNP20445    | <i>Kabuli</i>    | Ca_Kabuli_denovo             | 12818175                       | (T/G)       |
| 20446       | CakSNP20446    | <i>Kabuli</i>    | Ca_Kabuli_denovo             | 12829473                       | (G/A)       |
| 20447       | CakSNP20447    | <i>Kabuli</i>    | Ca_Kabuli_denovo             | 12830550                       | (C/G)       |
| 20448       | CakSNP20448    | <i>Kabuli</i>    | Ca_Kabuli_denovo             | 12830559                       | (G/A)       |
| 20449       | CakSNP20449    | <i>Kabuli</i>    | Ca_Kabuli_denovo             | 12832898                       | (C/A)       |
| 20450       | CakSNP20450    | <i>Kabuli</i>    | Ca_Kabuli_denovo             | 12832925                       | (C/G)       |
| 20451       | CakSNP20451    | <i>Kabuli</i>    | Ca_Kabuli_denovo             | 12843699                       | (C/T)       |
| 20452       | CakSNP20452    | <i>Kabuli</i>    | Ca_Kabuli_denovo             | 12843736                       | (T/A)       |
| 20453       | CakSNP20453    | <i>Kabuli</i>    | Ca_Kabuli_denovo             | 12845113                       | (G/T)       |
| 20454       | CakSNP20454    | <i>Kabuli</i>    | Ca_Kabuli_denovo             | 12848545                       | (T/C)       |
| 20455       | CakSNP20455    | <i>Kabuli</i>    | Ca_Kabuli_denovo             | 12850100                       | (T/C)       |
| 20456       | CakSNP20456    | <i>Kabuli</i>    | Ca_Kabuli_denovo             | 12850561                       | (A/G)       |
| 20457       | CakSNP20457    | <i>Kabuli</i>    | Ca_Kabuli_denovo             | 12850591                       | (C/T)       |
| 20458       | CakSNP20458    | <i>Kabuli</i>    | Ca_Kabuli_denovo             | 12854008                       | (A/G)       |
| 20459       | CakSNP20459    | <i>Kabuli</i>    | Ca_Kabuli_denovo             | 12854011                       | (G/C)       |
| 20460       | CakSNP20460    | <i>Kabuli</i>    | Ca_Kabuli_denovo             | 12856834                       | (T/G)       |
| 20461       | CakSNP20461    | <i>Kabuli</i>    | Ca_Kabuli_denovo             | 12860525                       | (G/A)       |
| 20462       | CakSNP20462    | <i>Kabuli</i>    | Ca_Kabuli_denovo             | 12862348                       | (T/G)       |
| 20463       | CakSNP20463    | <i>Kabuli</i>    | Ca_Kabuli_denovo             | 12863560                       | (A/G)       |
| 20464       | CakSNP20464    | <i>Kabuli</i>    | Ca_Kabuli_denovo             | 12865448                       | (C/T)       |
| 20465       | CakSNP20465    | <i>Kabuli</i>    | Ca_Kabuli_denovo             | 12865468                       | (C/T)       |
| 20466       | CakSNP20466    | <i>Kabuli</i>    | Ca_Kabuli_denovo             | 12869255                       | (A/G)       |
| 20467       | CakSNP20467    | <i>Kabuli</i>    | Ca_Kabuli_denovo             | 12871791                       | (C/G)       |
| 20468       | CakSNP20468    | <i>Kabuli</i>    | Ca_Kabuli_denovo             | 12872788                       | (G/A)       |
| 20469       | CakSNP20469    | <i>Kabuli</i>    | Ca_Kabuli_denovo             | 12872842                       | (T/C)       |
| 20470       | CakSNP20470    | <i>Kabuli</i>    | Ca_Kabuli_denovo             | 12876043                       | (A/G)       |
| 20471       | CakSNP20471    | <i>Kabuli</i>    | Ca_Kabuli_denovo             | 12888592                       | (A/C)       |
| 20472       | CakSNP20472    | <i>Kabuli</i>    | Ca_Kabuli_denovo             | 12897255                       | (A/G)       |
| 20473       | CakSNP20473    | <i>Kabuli</i>    | Ca_Kabuli_denovo             | 12899024                       | (T/C)       |
| 20474       | CakSNP20474    | <i>Kabuli</i>    | Ca_Kabuli_denovo             | 12903398                       | (C/A)       |
| 20475       | CakSNP20475    | <i>Kabuli</i>    | Ca_Kabuli_denovo             | 12903437                       | (C/A)       |
| 20476       | CakSNP20476    | <i>Kabuli</i>    | Ca_Kabuli_denovo             | 12904085                       | (T/C)       |
| 20477       | CakSNP20477    | <i>Kabuli</i>    | Ca_Kabuli_denovo             | 12904118                       | (A/G)       |
| 20478       | CakSNP20478    | <i>Kabuli</i>    | Ca_Kabuli_denovo             | 12910271                       | (C/T)       |
| 20479       | CakSNP20479    | <i>Kabuli</i>    | Ca_Kabuli_denovo             | 12910286                       | (A/G)       |
| 20480       | CakSNP20480    | <i>Kabuli</i>    | Ca_Kabuli_denovo             | 12911244                       | (T/G)       |
| 20481       | CakSNP20481    | <i>Kabuli</i>    | Ca_Kabuli_denovo             | 12911275                       | (A/G)       |

| <b>S.N.</b> | <b>SNP IDs</b> | <b>Cultivars</b> | <b>Chromosomes/scaffolds</b> | <b>Physical positions (bp)</b> | <b>SNPs</b> |
|-------------|----------------|------------------|------------------------------|--------------------------------|-------------|
| 20482       | CakSNP20482    | <i>Kabuli</i>    | Ca_Kabuli_denovo             | 12914398                       | (C/T)       |
| 20483       | CakSNP20483    | <i>Kabuli</i>    | Ca_Kabuli_denovo             | 12914424                       | (C/A)       |
| 20484       | CakSNP20484    | <i>Kabuli</i>    | Ca_Kabuli_denovo             | 12927462                       | (A/G)       |
| 20485       | CakSNP20485    | <i>Kabuli</i>    | Ca_Kabuli_denovo             | 12933253                       | (T/C)       |
| 20486       | CakSNP20486    | <i>Kabuli</i>    | Ca_Kabuli_denovo             | 12935128                       | (T/C)       |
| 20487       | CakSNP20487    | <i>Kabuli</i>    | Ca_Kabuli_denovo             | 12935673                       | (C/G)       |
| 20488       | CakSNP20488    | <i>Kabuli</i>    | Ca_Kabuli_denovo             | 12936805                       | (T/C)       |
| 20489       | CakSNP20489    | <i>Kabuli</i>    | Ca_Kabuli_denovo             | 12939572                       | (T/C)       |
| 20490       | CakSNP20490    | <i>Kabuli</i>    | Ca_Kabuli_denovo             | 12939580                       | (G/A)       |
| 20491       | CakSNP20491    | <i>Kabuli</i>    | Ca_Kabuli_denovo             | 12974203                       | (T/C)       |
| 20492       | CakSNP20492    | <i>Kabuli</i>    | Ca_Kabuli_denovo             | 12975846                       | (T/C)       |
| 20493       | CakSNP20493    | <i>Kabuli</i>    | Ca_Kabuli_denovo             | 12976965                       | (C/G)       |
| 20494       | CakSNP20494    | <i>Kabuli</i>    | Ca_Kabuli_denovo             | 12977012                       | (C/G)       |
| 20495       | CakSNP20495    | <i>Kabuli</i>    | Ca_Kabuli_denovo             | 12980401                       | (G/A)       |
| 20496       | CakSNP20496    | <i>Kabuli</i>    | Ca_Kabuli_denovo             | 12980404                       | (G/C)       |
| 20497       | CakSNP20497    | <i>Kabuli</i>    | Ca_Kabuli_denovo             | 12981713                       | (C/T)       |
| 20498       | CakSNP20498    | <i>Kabuli</i>    | Ca_Kabuli_denovo             | 12983088                       | (A/G)       |
| 20499       | CakSNP20499    | <i>Kabuli</i>    | Ca_Kabuli_denovo             | 12997717                       | (G/A)       |
| 20500       | CakSNP20500    | <i>Kabuli</i>    | Ca_Kabuli_denovo             | 13000283                       | (A/C)       |
| 20501       | CakSNP20501    | <i>Kabuli</i>    | Ca_Kabuli_denovo             | 13013951                       | (A/C)       |
| 20502       | CakSNP20502    | <i>Kabuli</i>    | Ca_Kabuli_denovo             | 13013952                       | (G/A)       |
| 20503       | CakSNP20503    | <i>Kabuli</i>    | Ca_Kabuli_denovo             | 13013955                       | (C/T)       |
| 20504       | CakSNP20504    | <i>Kabuli</i>    | Ca_Kabuli_denovo             | 13014166                       | (T/C)       |
| 20505       | CakSNP20505    | <i>Kabuli</i>    | Ca_Kabuli_denovo             | 13016388                       | (C/T)       |
| 20506       | CakSNP20506    | <i>Kabuli</i>    | Ca_Kabuli_denovo             | 13016391                       | (G/C)       |
| 20507       | CakSNP20507    | <i>Kabuli</i>    | Ca_Kabuli_denovo             | 13020665                       | (G/A)       |
| 20508       | CakSNP20508    | <i>Kabuli</i>    | Ca_Kabuli_denovo             | 13021311                       | (G/A)       |
| 20509       | CakSNP20509    | <i>Kabuli</i>    | Ca_Kabuli_denovo             | 13028389                       | (A/G)       |
| 20510       | CakSNP20510    | <i>Kabuli</i>    | Ca_Kabuli_denovo             | 13028463                       | (G/A)       |
| 20511       | CakSNP20511    | <i>Kabuli</i>    | Ca_Kabuli_denovo             | 13030260                       | (G/A)       |
| 20512       | CakSNP20512    | <i>Kabuli</i>    | Ca_Kabuli_denovo             | 13031950                       | (A/C)       |
| 20513       | CakSNP20513    | <i>Kabuli</i>    | Ca_Kabuli_denovo             | 13032980                       | (G/A)       |
| 20514       | CakSNP20514    | <i>Kabuli</i>    | Ca_Kabuli_denovo             | 13033007                       | (C/T)       |
| 20515       | CakSNP20515    | <i>Kabuli</i>    | Ca_Kabuli_denovo             | 13044230                       | (G/C)       |
| 20516       | CakSNP20516    | <i>Kabuli</i>    | Ca_Kabuli_denovo             | 13047420                       | (G/A)       |
| 20517       | CakSNP20517    | <i>Kabuli</i>    | Ca_Kabuli_denovo             | 13048862                       | (C/T)       |
| 20518       | CakSNP20518    | <i>Kabuli</i>    | Ca_Kabuli_denovo             | 13049519                       | (T/C)       |
| 20519       | CakSNP20519    | <i>Kabuli</i>    | Ca_Kabuli_denovo             | 13051397                       | (C/G)       |

| <b>S.N.</b> | <b>SNP IDs</b> | <b>Cultivars</b> | <b>Chromosomes/scaffolds</b> | <b>Physical positions (bp)</b> | <b>SNPs</b> |
|-------------|----------------|------------------|------------------------------|--------------------------------|-------------|
| 20520       | CakSNP20520    | <i>Kabuli</i>    | Ca_Kabuli_denovo             | 13055832                       | (A/G)       |
| 20521       | CakSNP20521    | <i>Kabuli</i>    | Ca_Kabuli_denovo             | 13060385                       | (C/A)       |
| 20522       | CakSNP20522    | <i>Kabuli</i>    | Ca_Kabuli_denovo             | 13060407                       | (G/C)       |
| 20523       | CakSNP20523    | <i>Kabuli</i>    | Ca_Kabuli_denovo             | 13064433                       | (G/A)       |
| 20524       | CakSNP20524    | <i>Kabuli</i>    | Ca_Kabuli_denovo             | 13065262                       | (G/C)       |
| 20525       | CakSNP20525    | <i>Kabuli</i>    | Ca_Kabuli_denovo             | 13082032                       | (G/C)       |
| 20526       | CakSNP20526    | <i>Kabuli</i>    | Ca_Kabuli_denovo             | 13088614                       | (G/C)       |
| 20527       | CakSNP20527    | <i>Kabuli</i>    | Ca_Kabuli_denovo             | 13101486                       | (C/G)       |
| 20528       | CakSNP20528    | <i>Kabuli</i>    | Ca_Kabuli_denovo             | 13101540                       | (G/C)       |
| 20529       | CakSNP20529    | <i>Kabuli</i>    | Ca_Kabuli_denovo             | 13107551                       | (T/G)       |
| 20530       | CakSNP20530    | <i>Kabuli</i>    | Ca_Kabuli_denovo             | 13108297                       | (C/T)       |
| 20531       | CakSNP20531    | <i>Kabuli</i>    | Ca_Kabuli_denovo             | 13108376                       | (A/G)       |
| 20532       | CakSNP20532    | <i>Kabuli</i>    | Ca_Kabuli_denovo             | 13109480                       | (G/C)       |
| 20533       | CakSNP20533    | <i>Kabuli</i>    | Ca_Kabuli_denovo             | 13109533                       | (C/G)       |
| 20534       | CakSNP20534    | <i>Kabuli</i>    | Ca_Kabuli_denovo             | 13113390                       | (A/T)       |
| 20535       | CakSNP20535    | <i>Kabuli</i>    | Ca_Kabuli_denovo             | 13113393                       | (T/C)       |
| 20536       | CakSNP20536    | <i>Kabuli</i>    | Ca_Kabuli_denovo             | 13113408                       | (G/A)       |
| 20537       | CakSNP20537    | <i>Kabuli</i>    | Ca_Kabuli_denovo             | 13114873                       | (A/C)       |
| 20538       | CakSNP20538    | <i>Kabuli</i>    | Ca_Kabuli_denovo             | 13115242                       | (T/C)       |
| 20539       | CakSNP20539    | <i>Kabuli</i>    | Ca_Kabuli_denovo             | 13117588                       | (T/G)       |
| 20540       | CakSNP20540    | <i>Kabuli</i>    | Ca_Kabuli_denovo             | 13117614                       | (A/G)       |
| 20541       | CakSNP20541    | <i>Kabuli</i>    | Ca_Kabuli_denovo             | 13119370                       | (T/C)       |
| 20542       | CakSNP20542    | <i>Kabuli</i>    | Ca_Kabuli_denovo             | 13121866                       | (T/C)       |
| 20543       | CakSNP20543    | <i>Kabuli</i>    | Ca_Kabuli_denovo             | 13121875                       | (A/G)       |
| 20544       | CakSNP20544    | <i>Kabuli</i>    | Ca_Kabuli_denovo             | 13123297                       | (A/G)       |
| 20545       | CakSNP20545    | <i>Kabuli</i>    | Ca_Kabuli_denovo             | 13124552                       | (A/G)       |
| 20546       | CakSNP20546    | <i>Kabuli</i>    | Ca_Kabuli_denovo             | 13124612                       | (G/A)       |
| 20547       | CakSNP20547    | <i>Kabuli</i>    | Ca_Kabuli_denovo             | 13127534                       | (G/T)       |
| 20548       | CakSNP20548    | <i>Kabuli</i>    | Ca_Kabuli_denovo             | 13127558                       | (C/G)       |
| 20549       | CakSNP20549    | <i>Kabuli</i>    | Ca_Kabuli_denovo             | 13131624                       | (G/A)       |
| 20550       | CakSNP20550    | <i>Kabuli</i>    | Ca_Kabuli_denovo             | 13131674                       | (G/A)       |
| 20551       | CakSNP20551    | <i>Kabuli</i>    | Ca_Kabuli_denovo             | 13138680                       | (A/G)       |
| 20552       | CakSNP20552    | <i>Kabuli</i>    | Ca_Kabuli_denovo             | 13138756                       | (G/A)       |
| 20553       | CakSNP20553    | <i>Kabuli</i>    | Ca_Kabuli_denovo             | 13141952                       | (T/C)       |
| 20554       | CakSNP20554    | <i>Kabuli</i>    | Ca_Kabuli_denovo             | 13143666                       | (C/G)       |
| 20555       | CakSNP20555    | <i>Kabuli</i>    | Ca_Kabuli_denovo             | 13145752                       | (T/G)       |
| 20556       | CakSNP20556    | <i>Kabuli</i>    | Ca_Kabuli_denovo             | 13145765                       | (C/T)       |
| 20557       | CakSNP20557    | <i>Kabuli</i>    | Ca_Kabuli_denovo             | 13146212                       | (A/T)       |

| <b>S.N.</b> | <b>SNP IDs</b> | <b>Cultivars</b> | <b>Chromosomes/scaffolds</b> | <b>Physical positions (bp)</b> | <b>SNPs</b> |
|-------------|----------------|------------------|------------------------------|--------------------------------|-------------|
| 20558       | CakSNP20558    | <i>Kabuli</i>    | Ca_Kabuli_denovo             | 13146263                       | (T/A)       |
| 20559       | CakSNP20559    | <i>Kabuli</i>    | Ca_Kabuli_denovo             | 13147196                       | (A/G)       |
| 20560       | CakSNP20560    | <i>Kabuli</i>    | Ca_Kabuli_denovo             | 13147202                       | (G/A)       |
| 20561       | CakSNP20561    | <i>Kabuli</i>    | Ca_Kabuli_denovo             | 13155547                       | (G/T)       |
| 20562       | CakSNP20562    | <i>Kabuli</i>    | Ca_Kabuli_denovo             | 13162784                       | (G/C)       |
| 20563       | CakSNP20563    | <i>Kabuli</i>    | Ca_Kabuli_denovo             | 13169513                       | (C/T)       |
| 20564       | CakSNP20564    | <i>Kabuli</i>    | Ca_Kabuli_denovo             | 13169527                       | (C/T)       |
| 20565       | CakSNP20565    | <i>Kabuli</i>    | Ca_Kabuli_denovo             | 13171259                       | (A/G)       |
| 20566       | CakSNP20566    | <i>Kabuli</i>    | Ca_Kabuli_denovo             | 13171283                       | (A/G)       |
| 20567       | CakSNP20567    | <i>Kabuli</i>    | Ca_Kabuli_denovo             | 13172040                       | (A/G)       |
| 20568       | CakSNP20568    | <i>Kabuli</i>    | Ca_Kabuli_denovo             | 13173271                       | (C/T)       |
| 20569       | CakSNP20569    | <i>Kabuli</i>    | Ca_Kabuli_denovo             | 13173276                       | (G/A)       |
| 20570       | CakSNP20570    | <i>Kabuli</i>    | Ca_Kabuli_denovo             | 13178980                       | (C/G)       |
| 20571       | CakSNP20571    | <i>Kabuli</i>    | Ca_Kabuli_denovo             | 13179014                       | (C/G)       |
| 20572       | CakSNP20572    | <i>Kabuli</i>    | Ca_Kabuli_denovo             | 13182701                       | (C/G)       |
| 20573       | CakSNP20573    | <i>Kabuli</i>    | Ca_Kabuli_denovo             | 13184993                       | (G/C)       |
| 20574       | CakSNP20574    | <i>Kabuli</i>    | Ca_Kabuli_denovo             | 13187926                       | (C/T)       |
| 20575       | CakSNP20575    | <i>Kabuli</i>    | Ca_Kabuli_denovo             | 13189933                       | (A/G)       |
| 20576       | CakSNP20576    | <i>Kabuli</i>    | Ca_Kabuli_denovo             | 13194655                       | (A/C)       |
| 20577       | CakSNP20577    | <i>Kabuli</i>    | Ca_Kabuli_denovo             | 13198712                       | (T/C)       |
| 20578       | CakSNP20578    | <i>Kabuli</i>    | Ca_Kabuli_denovo             | 13198718                       | (C/T)       |
| 20579       | CakSNP20579    | <i>Kabuli</i>    | Ca_Kabuli_denovo             | 13203576                       | (T/G)       |
| 20580       | CakSNP20580    | <i>Kabuli</i>    | Ca_Kabuli_denovo             | 13205570                       | (T/C)       |
| 20581       | CakSNP20581    | <i>Kabuli</i>    | Ca_Kabuli_denovo             | 13205676                       | (A/C)       |
| 20582       | CakSNP20582    | <i>Kabuli</i>    | Ca_Kabuli_denovo             | 13206342                       | (G/C)       |
| 20583       | CakSNP20583    | <i>Kabuli</i>    | Ca_Kabuli_denovo             | 13208511                       | (A/C)       |
| 20584       | CakSNP20584    | <i>Kabuli</i>    | Ca_Kabuli_denovo             | 13208512                       | (G/A)       |
| 20585       | CakSNP20585    | <i>Kabuli</i>    | Ca_Kabuli_denovo             | 13211264                       | (A/G)       |
| 20586       | CakSNP20586    | <i>Kabuli</i>    | Ca_Kabuli_denovo             | 13219900                       | (G/T)       |
| 20587       | CakSNP20587    | <i>Kabuli</i>    | Ca_Kabuli_denovo             | 13220434                       | (C/T)       |
| 20588       | CakSNP20588    | <i>Kabuli</i>    | Ca_Kabuli_denovo             | 13220440                       | (A/G)       |
| 20589       | CakSNP20589    | <i>Kabuli</i>    | Ca_Kabuli_denovo             | 13223422                       | (C/G)       |
| 20590       | CakSNP20590    | <i>Kabuli</i>    | Ca_Kabuli_denovo             | 13223458                       | (C/T)       |
| 20591       | CakSNP20591    | <i>Kabuli</i>    | Ca_Kabuli_denovo             | 13233187                       | (T/A)       |
| 20592       | CakSNP20592    | <i>Kabuli</i>    | Ca_Kabuli_denovo             | 13233773                       | (C/T)       |
| 20593       | CakSNP20593    | <i>Kabuli</i>    | Ca_Kabuli_denovo             | 13236038                       | (A/C)       |
| 20594       | CakSNP20594    | <i>Kabuli</i>    | Ca_Kabuli_denovo             | 13236125                       | (T/C)       |
| 20595       | CakSNP20595    | <i>Kabuli</i>    | Ca_Kabuli_denovo             | 13236608                       | (A/G)       |



| <b>S.N.</b> | <b>SNP IDs</b> | <b>Cultivars</b> | <b>Chromosomes/scaffolds</b> | <b>Physical positions (bp)</b> | <b>SNPs</b> |
|-------------|----------------|------------------|------------------------------|--------------------------------|-------------|
| 20596       | CakSNP20596    | <i>Kabuli</i>    | Ca_Kabuli_denovo             | 13243606                       | (G/T)       |
| 20597       | CakSNP20597    | <i>Kabuli</i>    | Ca_Kabuli_denovo             | 13243624                       | (C/A)       |
| 20598       | CakSNP20598    | <i>Kabuli</i>    | Ca_Kabuli_denovo             | 13255115                       | (G/A)       |
| 20599       | CakSNP20599    | <i>Kabuli</i>    | Ca_Kabuli_denovo             | 13256716                       | (C/T)       |
| 20600       | CakSNP20600    | <i>Kabuli</i>    | Ca_Kabuli_denovo             | 13257182                       | (A/G)       |
| 20601       | CakSNP20601    | <i>Kabuli</i>    | Ca_Kabuli_denovo             | 13257218                       | (C/T)       |
| 20602       | CakSNP20602    | <i>Kabuli</i>    | Ca_Kabuli_denovo             | 13257741                       | (G/C)       |
| 20603       | CakSNP20603    | <i>Kabuli</i>    | Ca_Kabuli_denovo             | 13257752                       | (C/T)       |
| 20604       | CakSNP20604    | <i>Kabuli</i>    | Ca_Kabuli_denovo             | 13262646                       | (C/T)       |
| 20605       | CakSNP20605    | <i>Kabuli</i>    | Ca_Kabuli_denovo             | 13262682                       | (G/C)       |
| 20606       | CakSNP20606    | <i>Kabuli</i>    | Ca_Kabuli_denovo             | 13263857                       | (C/G)       |
| 20607       | CakSNP20607    | <i>Kabuli</i>    | Ca_Kabuli_denovo             | 13263881                       | (T/C)       |
| 20608       | CakSNP20608    | <i>Kabuli</i>    | Ca_Kabuli_denovo             | 13265069                       | (T/C)       |
| 20609       | CakSNP20609    | <i>Kabuli</i>    | Ca_Kabuli_denovo             | 13265087                       | (G/C)       |
| 20610       | CakSNP20610    | <i>Kabuli</i>    | Ca_Kabuli_denovo             | 13265898                       | (A/G)       |
| 20611       | CakSNP20611    | <i>Kabuli</i>    | Ca_Kabuli_denovo             | 13265931                       | (G/A)       |
| 20612       | CakSNP20612    | <i>Kabuli</i>    | Ca_Kabuli_denovo             | 13266100                       | (T/C)       |
| 20613       | CakSNP20613    | <i>Kabuli</i>    | Ca_Kabuli_denovo             | 13266130                       | (A/T)       |
| 20614       | CakSNP20614    | <i>Kabuli</i>    | Ca_Kabuli_denovo             | 13268055                       | (T/C)       |
| 20615       | CakSNP20615    | <i>Kabuli</i>    | Ca_Kabuli_denovo             | 13268076                       | (G/T)       |
| 20616       | CakSNP20616    | <i>Kabuli</i>    | Ca_Kabuli_denovo             | 13271245                       | (A/G)       |
| 20617       | CakSNP20617    | <i>Kabuli</i>    | Ca_Kabuli_denovo             | 13271253                       | (T/C)       |
| 20618       | CakSNP20618    | <i>Kabuli</i>    | Ca_Kabuli_denovo             | 13274178                       | (C/A)       |
| 20619       | CakSNP20619    | <i>Kabuli</i>    | Ca_Kabuli_denovo             | 13274216                       | (C/G)       |
| 20620       | CakSNP20620    | <i>Kabuli</i>    | Ca_Kabuli_denovo             | 13281091                       | (T/A)       |
| 20621       | CakSNP20621    | <i>Kabuli</i>    | Ca_Kabuli_denovo             | 13283664                       | (C/A)       |
| 20622       | CakSNP20622    | <i>Kabuli</i>    | Ca_Kabuli_denovo             | 13291126                       | (C/A)       |
| 20623       | CakSNP20623    | <i>Kabuli</i>    | Ca_Kabuli_denovo             | 13298005                       | (C/T)       |
| 20624       | CakSNP20624    | <i>Kabuli</i>    | Ca_Kabuli_denovo             | 13299371                       | (A/T)       |
| 20625       | CakSNP20625    | <i>Kabuli</i>    | Ca_Kabuli_denovo             | 13299943                       | (G/A)       |
| 20626       | CakSNP20626    | <i>Kabuli</i>    | Ca_Kabuli_denovo             | 13300502                       | (C/T)       |
| 20627       | CakSNP20627    | <i>Kabuli</i>    | Ca_Kabuli_denovo             | 13300525                       | (C/T)       |
| 20628       | CakSNP20628    | <i>Kabuli</i>    | Ca_Kabuli_denovo             | 13302088                       | (G/T)       |
| 20629       | CakSNP20629    | <i>Kabuli</i>    | Ca_Kabuli_denovo             | 13302097                       | (A/G)       |
| 20630       | CakSNP20630    | <i>Kabuli</i>    | Ca_Kabuli_denovo             | 13305822                       | (C/T)       |
| 20631       | CakSNP20631    | <i>Kabuli</i>    | Ca_Kabuli_denovo             | 13309255                       | (A/G)       |
| 20632       | CakSNP20632    | <i>Kabuli</i>    | Ca_Kabuli_denovo             | 13309265                       | (T/C)       |
| 20633       | CakSNP20633    | <i>Kabuli</i>    | Ca_Kabuli_denovo             | 13318048                       | (T/C)       |

| <b>S.N.</b> | <b>SNP IDs</b> | <b>Cultivars</b> | <b>Chromosomes/scaffolds</b> | <b>Physical positions (bp)</b> | <b>SNPs</b> |
|-------------|----------------|------------------|------------------------------|--------------------------------|-------------|
| 20634       | CakSNP20634    | <i>Kabuli</i>    | Ca_Kabuli_denovo             | 13321431                       | (G/C)       |
| 20635       | CakSNP20635    | <i>Kabuli</i>    | Ca_Kabuli_denovo             | 13321444                       | (T/A)       |
| 20636       | CakSNP20636    | <i>Kabuli</i>    | Ca_Kabuli_denovo             | 13326443                       | (T/A)       |
| 20637       | CakSNP20637    | <i>Kabuli</i>    | Ca_Kabuli_denovo             | 13326470                       | (A/G)       |
| 20638       | CakSNP20638    | <i>Kabuli</i>    | Ca_Kabuli_denovo             | 13331285                       | (A/G)       |
| 20639       | CakSNP20639    | <i>Kabuli</i>    | Ca_Kabuli_denovo             | 13331312                       | (C/G)       |
| 20640       | CakSNP20640    | <i>Kabuli</i>    | Ca_Kabuli_denovo             | 13338641                       | (A/C)       |
| 20641       | CakSNP20641    | <i>Kabuli</i>    | Ca_Kabuli_denovo             | 13338649                       | (T/G)       |
| 20642       | CakSNP20642    | <i>Kabuli</i>    | Ca_Kabuli_denovo             | 13342906                       | (A/G)       |
| 20643       | CakSNP20643    | <i>Kabuli</i>    | Ca_Kabuli_denovo             | 13347586                       | (G/C)       |
| 20644       | CakSNP20644    | <i>Kabuli</i>    | Ca_Kabuli_denovo             | 13347619                       | (C/T)       |
| 20645       | CakSNP20645    | <i>Kabuli</i>    | Ca_Kabuli_denovo             | 13350368                       | (G/C)       |
| 20646       | CakSNP20646    | <i>Kabuli</i>    | Ca_Kabuli_denovo             | 13350390                       | (A/G)       |
| 20647       | CakSNP20647    | <i>Kabuli</i>    | Ca_Kabuli_denovo             | 13350733                       | (A/G)       |
| 20648       | CakSNP20648    | <i>Kabuli</i>    | Ca_Kabuli_denovo             | 13350766                       | (T/C)       |
| 20649       | CakSNP20649    | <i>Kabuli</i>    | Ca_Kabuli_denovo             | 13351946                       | (A/G)       |
| 20650       | CakSNP20650    | <i>Kabuli</i>    | Ca_Kabuli_denovo             | 13354654                       | (C/G)       |
| 20651       | CakSNP20651    | <i>Kabuli</i>    | Ca_Kabuli_denovo             | 13361155                       | (T/C)       |
| 20652       | CakSNP20652    | <i>Kabuli</i>    | Ca_Kabuli_denovo             | 13368691                       | (G/T)       |
| 20653       | CakSNP20653    | <i>Kabuli</i>    | Ca_Kabuli_denovo             | 13373609                       | (C/T)       |
| 20654       | CakSNP20654    | <i>Kabuli</i>    | Ca_Kabuli_denovo             | 13373661                       | (G/A)       |
| 20655       | CakSNP20655    | <i>Kabuli</i>    | Ca_Kabuli_denovo             | 13375276                       | (T/C)       |
| 20656       | CakSNP20656    | <i>Kabuli</i>    | Ca_Kabuli_denovo             | 13376177                       | (C/T)       |
| 20657       | CakSNP20657    | <i>Kabuli</i>    | Ca_Kabuli_denovo             | 13376187                       | (C/T)       |
| 20658       | CakSNP20658    | <i>Kabuli</i>    | Ca_Kabuli_denovo             | 13390756                       | (T/C)       |
| 20659       | CakSNP20659    | <i>Kabuli</i>    | Ca_Kabuli_denovo             | 13390759                       | (A/G)       |
| 20660       | CakSNP20660    | <i>Kabuli</i>    | Ca_Kabuli_denovo             | 13400505                       | (T/C)       |
| 20661       | CakSNP20661    | <i>Kabuli</i>    | Ca_Kabuli_denovo             | 13400514                       | (C/A)       |
| 20662       | CakSNP20662    | <i>Kabuli</i>    | Ca_Kabuli_denovo             | 13402676                       | (C/T)       |
| 20663       | CakSNP20663    | <i>Kabuli</i>    | Ca_Kabuli_denovo             | 13402685                       | (C/T)       |
| 20664       | CakSNP20664    | <i>Kabuli</i>    | Ca_Kabuli_denovo             | 13402948                       | (T/C)       |
| 20665       | CakSNP20665    | <i>Kabuli</i>    | Ca_Kabuli_denovo             | 13402956                       | (G/C)       |
| 20666       | CakSNP20666    | <i>Kabuli</i>    | Ca_Kabuli_denovo             | 13402957                       | (C/T)       |
| 20667       | CakSNP20667    | <i>Kabuli</i>    | Ca_Kabuli_denovo             | 13403374                       | (C/T)       |
| 20668       | CakSNP20668    | <i>Kabuli</i>    | Ca_Kabuli_denovo             | 13404299                       | (C/T)       |
| 20669       | CakSNP20669    | <i>Kabuli</i>    | Ca_Kabuli_denovo             | 13405999                       | (T/C)       |
| 20670       | CakSNP20670    | <i>Kabuli</i>    | Ca_Kabuli_denovo             | 13408133                       | (G/A)       |
| 20671       | CakSNP20671    | <i>Kabuli</i>    | Ca_Kabuli_denovo             | 13413523                       | (C/T)       |

| <b>S.N.</b> | <b>SNP IDs</b> | <b>Cultivars</b> | <b>Chromosomes/scaffolds</b> | <b>Physical positions (bp)</b> | <b>SNPs</b> |
|-------------|----------------|------------------|------------------------------|--------------------------------|-------------|
| 20672       | CakSNP20672    | <i>Kabuli</i>    | Ca_Kabuli_denovo             | 13421129                       | (A/G)       |
| 20673       | CakSNP20673    | <i>Kabuli</i>    | Ca_Kabuli_denovo             | 13423674                       | (G/A)       |
| 20674       | CakSNP20674    | <i>Kabuli</i>    | Ca_Kabuli_denovo             | 13424125                       | (A/T)       |
| 20675       | CakSNP20675    | <i>Kabuli</i>    | Ca_Kabuli_denovo             | 13425959                       | (C/G)       |
| 20676       | CakSNP20676    | <i>Kabuli</i>    | Ca_Kabuli_denovo             | 13431139                       | (T/C)       |
| 20677       | CakSNP20677    | <i>Kabuli</i>    | Ca_Kabuli_denovo             | 13434517                       | (C/G)       |
| 20678       | CakSNP20678    | <i>Kabuli</i>    | Ca_Kabuli_denovo             | 13437430                       | (T/C)       |
| 20679       | CakSNP20679    | <i>Kabuli</i>    | Ca_Kabuli_denovo             | 13438296                       | (C/A)       |
| 20680       | CakSNP20680    | <i>Kabuli</i>    | Ca_Kabuli_denovo             | 13444653                       | (A/G)       |
| 20681       | CakSNP20681    | <i>Kabuli</i>    | Ca_Kabuli_denovo             | 13449681                       | (C/T)       |
| 20682       | CakSNP20682    | <i>Kabuli</i>    | Ca_Kabuli_denovo             | 13450012                       | (G/A)       |
| 20683       | CakSNP20683    | <i>Kabuli</i>    | Ca_Kabuli_denovo             | 13451539                       | (T/C)       |
| 20684       | CakSNP20684    | <i>Kabuli</i>    | Ca_Kabuli_denovo             | 13451572                       | (G/T)       |
| 20685       | CakSNP20685    | <i>Kabuli</i>    | Ca_Kabuli_denovo             | 13452839                       | (A/G)       |
| 20686       | CakSNP20686    | <i>Kabuli</i>    | Ca_Kabuli_denovo             | 13462372                       | (A/C)       |
| 20687       | CakSNP20687    | <i>Kabuli</i>    | Ca_Kabuli_denovo             | 13465634                       | (C/G)       |
| 20688       | CakSNP20688    | <i>Kabuli</i>    | Ca_Kabuli_denovo             | 13467173                       | (G/A)       |
| 20689       | CakSNP20689    | <i>Kabuli</i>    | Ca_Kabuli_denovo             | 13475729                       | (C/T)       |
| 20690       | CakSNP20690    | <i>Kabuli</i>    | Ca_Kabuli_denovo             | 13475780                       | (T/C)       |
| 20691       | CakSNP20691    | <i>Kabuli</i>    | Ca_Kabuli_denovo             | 13477849                       | (T/C)       |
| 20692       | CakSNP20692    | <i>Kabuli</i>    | Ca_Kabuli_denovo             | 13477879                       | (C/T)       |
| 20693       | CakSNP20693    | <i>Kabuli</i>    | Ca_Kabuli_denovo             | 13482416                       | (C/T)       |
| 20694       | CakSNP20694    | <i>Kabuli</i>    | Ca_Kabuli_denovo             | 13483653                       | (C/G)       |
| 20695       | CakSNP20695    | <i>Kabuli</i>    | Ca_Kabuli_denovo             | 13483915                       | (C/T)       |
| 20696       | CakSNP20696    | <i>Kabuli</i>    | Ca_Kabuli_denovo             | 13483957                       | (C/T)       |
| 20697       | CakSNP20697    | <i>Kabuli</i>    | Ca_Kabuli_denovo             | 13484597                       | (G/A)       |
| 20698       | CakSNP20698    | <i>Kabuli</i>    | Ca_Kabuli_denovo             | 13486160                       | (G/A)       |
| 20699       | CakSNP20699    | <i>Kabuli</i>    | Ca_Kabuli_denovo             | 13486322                       | (C/T)       |
| 20700       | CakSNP20700    | <i>Kabuli</i>    | Ca_Kabuli_denovo             | 13487264                       | (C/T)       |
| 20701       | CakSNP20701    | <i>Kabuli</i>    | Ca_Kabuli_denovo             | 13487276                       | (C/T)       |
| 20702       | CakSNP20702    | <i>Kabuli</i>    | Ca_Kabuli_denovo             | 13489767                       | (C/G)       |
| 20703       | CakSNP20703    | <i>Kabuli</i>    | Ca_Kabuli_denovo             | 13489770                       | (A/G)       |
| 20704       | CakSNP20704    | <i>Kabuli</i>    | Ca_Kabuli_denovo             | 13489794                       | (C/T)       |
| 20705       | CakSNP20705    | <i>Kabuli</i>    | Ca_Kabuli_denovo             | 13494557                       | (G/C)       |
| 20706       | CakSNP20706    | <i>Kabuli</i>    | Ca_Kabuli_denovo             | 13494571                       | (A/G)       |
| 20707       | CakSNP20707    | <i>Kabuli</i>    | Ca_Kabuli_denovo             | 13500382                       | (C/A)       |
| 20708       | CakSNP20708    | <i>Kabuli</i>    | Ca_Kabuli_denovo             | 13511809                       | (A/G)       |
| 20709       | CakSNP20709    | <i>Kabuli</i>    | Ca_Kabuli_denovo             | 13511857                       | (A/G)       |

| <b>S.N.</b> | <b>SNP IDs</b> | <b>Cultivars</b> | <b>Chromosomes/scaffolds</b> | <b>Physical positions (bp)</b> | <b>SNPs</b> |
|-------------|----------------|------------------|------------------------------|--------------------------------|-------------|
| 20710       | CakSNP20710    | <i>Kabuli</i>    | Ca_Kabuli_denovo             | 13515765                       | (T/C)       |
| 20711       | CakSNP20711    | <i>Kabuli</i>    | Ca_Kabuli_denovo             | 13528252                       | (G/A)       |
| 20712       | CakSNP20712    | <i>Kabuli</i>    | Ca_Kabuli_denovo             | 13528261                       | (G/A)       |
| 20713       | CakSNP20713    | <i>Kabuli</i>    | Ca_Kabuli_denovo             | 13536814                       | (A/G)       |
| 20714       | CakSNP20714    | <i>Kabuli</i>    | Ca_Kabuli_denovo             | 13536909                       | (C/T)       |
| 20715       | CakSNP20715    | <i>Kabuli</i>    | Ca_Kabuli_denovo             | 13536915                       | (G/C)       |
| 20716       | CakSNP20716    | <i>Kabuli</i>    | Ca_Kabuli_denovo             | 13539057                       | (G/C)       |
| 20717       | CakSNP20717    | <i>Kabuli</i>    | Ca_Kabuli_denovo             | 13544201                       | (G/A)       |
| 20718       | CakSNP20718    | <i>Kabuli</i>    | Ca_Kabuli_denovo             | 13550350                       | (T/C)       |
| 20719       | CakSNP20719    | <i>Kabuli</i>    | Ca_Kabuli_denovo             | 13560452                       | (G/A)       |
| 20720       | CakSNP20720    | <i>Kabuli</i>    | Ca_Kabuli_denovo             | 13565367                       | (C/G)       |
| 20721       | CakSNP20721    | <i>Kabuli</i>    | Ca_Kabuli_denovo             | 13565390                       | (A/G)       |
| 20722       | CakSNP20722    | <i>Kabuli</i>    | Ca_Kabuli_denovo             | 13575988                       | (T/C)       |
| 20723       | CakSNP20723    | <i>Kabuli</i>    | Ca_Kabuli_denovo             | 13576027                       | (G/T)       |
| 20724       | CakSNP20724    | <i>Kabuli</i>    | Ca_Kabuli_denovo             | 13602770                       | (G/T)       |
| 20725       | CakSNP20725    | <i>Kabuli</i>    | Ca_Kabuli_denovo             | 13604914                       | (T/C)       |
| 20726       | CakSNP20726    | <i>Kabuli</i>    | Ca_Kabuli_denovo             | 13604935                       | (C/T)       |
| 20727       | CakSNP20727    | <i>Kabuli</i>    | Ca_Kabuli_denovo             | 13606541                       | (A/G)       |
| 20728       | CakSNP20728    | <i>Kabuli</i>    | Ca_Kabuli_denovo             | 13613180                       | (T/C)       |
| 20729       | CakSNP20729    | <i>Kabuli</i>    | Ca_Kabuli_denovo             | 13613224                       | (A/G)       |
| 20730       | CakSNP20730    | <i>Kabuli</i>    | Ca_Kabuli_denovo             | 13613225                       | (A/G)       |
| 20731       | CakSNP20731    | <i>Kabuli</i>    | Ca_Kabuli_denovo             | 13613231                       | (C/G)       |
| 20732       | CakSNP20732    | <i>Kabuli</i>    | Ca_Kabuli_denovo             | 13617653                       | (C/T)       |
| 20733       | CakSNP20733    | <i>Kabuli</i>    | Ca_Kabuli_denovo             | 13617683                       | (A/T)       |
| 20734       | CakSNP20734    | <i>Kabuli</i>    | Ca_Kabuli_denovo             | 13623029                       | (G/A)       |
| 20735       | CakSNP20735    | <i>Kabuli</i>    | Ca_Kabuli_denovo             | 13623080                       | (G/C)       |
| 20736       | CakSNP20736    | <i>Kabuli</i>    | Ca_Kabuli_denovo             | 13625592                       | (C/G)       |
| 20737       | CakSNP20737    | <i>Kabuli</i>    | Ca_Kabuli_denovo             | 13625871                       | (G/T)       |
| 20738       | CakSNP20738    | <i>Kabuli</i>    | Ca_Kabuli_denovo             | 13626117                       | (C/T)       |
| 20739       | CakSNP20739    | <i>Kabuli</i>    | Ca_Kabuli_denovo             | 13629263                       | (T/C)       |
| 20740       | CakSNP20740    | <i>Kabuli</i>    | Ca_Kabuli_denovo             | 13629308                       | (C/T)       |
| 20741       | CakSNP20741    | <i>Kabuli</i>    | Ca_Kabuli_denovo             | 13632321                       | (T/C)       |
| 20742       | CakSNP20742    | <i>Kabuli</i>    | Ca_Kabuli_denovo             | 13632391                       | (A/G)       |
| 20743       | CakSNP20743    | <i>Kabuli</i>    | Ca_Kabuli_denovo             | 13641188                       | (A/G)       |
| 20744       | CakSNP20744    | <i>Kabuli</i>    | Ca_Kabuli_denovo             | 13641203                       | (G/A)       |
| 20745       | CakSNP20745    | <i>Kabuli</i>    | Ca_Kabuli_denovo             | 13641400                       | (G/A)       |
| 20746       | CakSNP20746    | <i>Kabuli</i>    | Ca_Kabuli_denovo             | 13643385                       | (G/C)       |
| 20747       | CakSNP20747    | <i>Kabuli</i>    | Ca_Kabuli_denovo             | 13643444                       | (A/G)       |

| <b>S.N.</b> | <b>SNP IDs</b> | <b>Cultivars</b> | <b>Chromosomes/scaffolds</b> | <b>Physical positions (bp)</b> | <b>SNPs</b> |
|-------------|----------------|------------------|------------------------------|--------------------------------|-------------|
| 20748       | CakSNP20748    | <i>Kabuli</i>    | Ca_Kabuli_denovo             | 13651337                       | (T/G)       |
| 20749       | CakSNP20749    | <i>Kabuli</i>    | Ca_Kabuli_denovo             | 13655503                       | (A/G)       |
| 20750       | CakSNP20750    | <i>Kabuli</i>    | Ca_Kabuli_denovo             | 13655518                       | (A/G)       |
| 20751       | CakSNP20751    | <i>Kabuli</i>    | Ca_Kabuli_denovo             | 13666470                       | (C/T)       |
| 20752       | CakSNP20752    | <i>Kabuli</i>    | Ca_Kabuli_denovo             | 13666480                       | (A/G)       |
| 20753       | CakSNP20753    | <i>Kabuli</i>    | Ca_Kabuli_denovo             | 13673377                       | (T/C)       |
| 20754       | CakSNP20754    | <i>Kabuli</i>    | Ca_Kabuli_denovo             | 13675125                       | (C/T)       |
| 20755       | CakSNP20755    | <i>Kabuli</i>    | Ca_Kabuli_denovo             | 13675292                       | (G/A)       |
| 20756       | CakSNP20756    | <i>Kabuli</i>    | Ca_Kabuli_denovo             | 13677592                       | (A/C)       |
| 20757       | CakSNP20757    | <i>Kabuli</i>    | Ca_Kabuli_denovo             | 13687869                       | (G/C)       |
| 20758       | CakSNP20758    | <i>Kabuli</i>    | Ca_Kabuli_denovo             | 13691846                       | (G/A)       |
| 20759       | CakSNP20759    | <i>Kabuli</i>    | Ca_Kabuli_denovo             | 13691919                       | (T/A)       |
| 20760       | CakSNP20760    | <i>Kabuli</i>    | Ca_Kabuli_denovo             | 13698536                       | (C/T)       |
| 20761       | CakSNP20761    | <i>Kabuli</i>    | Ca_Kabuli_denovo             | 13698551                       | (G/C)       |
| 20762       | CakSNP20762    | <i>Kabuli</i>    | Ca_Kabuli_denovo             | 13701338                       | (G/C)       |
| 20763       | CakSNP20763    | <i>Kabuli</i>    | Ca_Kabuli_denovo             | 13701377                       | (C/T)       |
| 20764       | CakSNP20764    | <i>Kabuli</i>    | Ca_Kabuli_denovo             | 13704680                       | (T/C)       |
| 20765       | CakSNP20765    | <i>Kabuli</i>    | Ca_Kabuli_denovo             | 13706750                       | (T/C)       |
| 20766       | CakSNP20766    | <i>Kabuli</i>    | Ca_Kabuli_denovo             | 13706908                       | (T/C)       |
| 20767       | CakSNP20767    | <i>Kabuli</i>    | Ca_Kabuli_denovo             | 13706944                       | (C/T)       |
| 20768       | CakSNP20768    | <i>Kabuli</i>    | Ca_Kabuli_denovo             | 13709609                       | (A/G)       |
| 20769       | CakSNP20769    | <i>Kabuli</i>    | Ca_Kabuli_denovo             | 13710121                       | (G/T)       |
| 20770       | CakSNP20770    | <i>Kabuli</i>    | Ca_Kabuli_denovo             | 13711298                       | (T/C)       |
| 20771       | CakSNP20771    | <i>Kabuli</i>    | Ca_Kabuli_denovo             | 13711325                       | (C/G)       |
| 20772       | CakSNP20772    | <i>Kabuli</i>    | Ca_Kabuli_denovo             | 13718021                       | (G/A)       |
| 20773       | CakSNP20773    | <i>Kabuli</i>    | Ca_Kabuli_denovo             | 13721788                       | (T/C)       |
| 20774       | CakSNP20774    | <i>Kabuli</i>    | Ca_Kabuli_denovo             | 13721815                       | (C/T)       |
| 20775       | CakSNP20775    | <i>Kabuli</i>    | Ca_Kabuli_denovo             | 13732598                       | (C/T)       |
| 20776       | CakSNP20776    | <i>Kabuli</i>    | Ca_Kabuli_denovo             | 13732658                       | (C/T)       |
| 20777       | CakSNP20777    | <i>Kabuli</i>    | Ca_Kabuli_denovo             | 13736037                       | (G/A)       |
| 20778       | CakSNP20778    | <i>Kabuli</i>    | Ca_Kabuli_denovo             | 13736092                       | (C/G)       |
| 20779       | CakSNP20779    | <i>Kabuli</i>    | Ca_Kabuli_denovo             | 13739207                       | (A/G)       |
| 20780       | CakSNP20780    | <i>Kabuli</i>    | Ca_Kabuli_denovo             | 13739213                       | (C/T)       |
| 20781       | CakSNP20781    | <i>Kabuli</i>    | Ca_Kabuli_denovo             | 13740208                       | (A/G)       |
| 20782       | CakSNP20782    | <i>Kabuli</i>    | Ca_Kabuli_denovo             | 13745703                       | (T/C)       |
| 20783       | CakSNP20783    | <i>Kabuli</i>    | Ca_Kabuli_denovo             | 13745704                       | (T/C)       |
| 20784       | CakSNP20784    | <i>Kabuli</i>    | Ca_Kabuli_denovo             | 13757579                       | (G/T)       |
| 20785       | CakSNP20785    | <i>Kabuli</i>    | Ca_Kabuli_denovo             | 13762433                       | (G/A)       |

| <b>S.N.</b> | <b>SNP IDs</b> | <b>Cultivars</b> | <b>Chromosomes/scaffolds</b> | <b>Physical positions (bp)</b> | <b>SNPs</b> |
|-------------|----------------|------------------|------------------------------|--------------------------------|-------------|
| 20786       | CakSNP20786    | <i>Kabuli</i>    | Ca_Kabuli_denovo             | 13762450                       | (C/T)       |
| 20787       | CakSNP20787    | <i>Kabuli</i>    | Ca_Kabuli_denovo             | 13764490                       | (C/A)       |
| 20788       | CakSNP20788    | <i>Kabuli</i>    | Ca_Kabuli_denovo             | 13770447                       | (C/T)       |
| 20789       | CakSNP20789    | <i>Kabuli</i>    | Ca_Kabuli_denovo             | 13770484                       | (T/C)       |
| 20790       | CakSNP20790    | <i>Kabuli</i>    | Ca_Kabuli_denovo             | 13788645                       | (T/G)       |
| 20791       | CakSNP20791    | <i>Kabuli</i>    | Ca_Kabuli_denovo             | 13788697                       | (G/A)       |
| 20792       | CakSNP20792    | <i>Kabuli</i>    | Ca_Kabuli_denovo             | 13788721                       | (T/C)       |
| 20793       | CakSNP20793    | <i>Kabuli</i>    | Ca_Kabuli_denovo             | 13794543                       | (T/C)       |
| 20794       | CakSNP20794    | <i>Kabuli</i>    | Ca_Kabuli_denovo             | 13799629                       | (G/C)       |
| 20795       | CakSNP20795    | <i>Kabuli</i>    | Ca_Kabuli_denovo             | 13799704                       | (T/C)       |
| 20796       | CakSNP20796    | <i>Kabuli</i>    | Ca_Kabuli_denovo             | 13817434                       | (G/A)       |
| 20797       | CakSNP20797    | <i>Kabuli</i>    | Ca_Kabuli_denovo             | 13819277                       | (C/A)       |
| 20798       | CakSNP20798    | <i>Kabuli</i>    | Ca_Kabuli_denovo             | 13819286                       | (G/C)       |
| 20799       | CakSNP20799    | <i>Kabuli</i>    | Ca_Kabuli_denovo             | 13820035                       | (C/T)       |
| 20800       | CakSNP20800    | <i>Kabuli</i>    | Ca_Kabuli_denovo             | 13826976                       | (G/T)       |
| 20801       | CakSNP20801    | <i>Kabuli</i>    | Ca_Kabuli_denovo             | 13826995                       | (G/A)       |
| 20802       | CakSNP20802    | <i>Kabuli</i>    | Ca_Kabuli_denovo             | 13831242                       | (A/T)       |
| 20803       | CakSNP20803    | <i>Kabuli</i>    | Ca_Kabuli_denovo             | 13838447                       | (T/C)       |
| 20804       | CakSNP20804    | <i>Kabuli</i>    | Ca_Kabuli_denovo             | 13841687                       | (C/T)       |
| 20805       | CakSNP20805    | <i>Kabuli</i>    | Ca_Kabuli_denovo             | 13841700                       | (A/G)       |
| 20806       | CakSNP20806    | <i>Kabuli</i>    | Ca_Kabuli_denovo             | 13841822                       | (T/G)       |
| 20807       | CakSNP20807    | <i>Kabuli</i>    | Ca_Kabuli_denovo             | 13849092                       | (C/T)       |
| 20808       | CakSNP20808    | <i>Kabuli</i>    | Ca_Kabuli_denovo             | 13851470                       | (A/G)       |
| 20809       | CakSNP20809    | <i>Kabuli</i>    | Ca_Kabuli_denovo             | 13854412                       | (G/C)       |
| 20810       | CakSNP20810    | <i>Kabuli</i>    | Ca_Kabuli_denovo             | 13868476                       | (A/C)       |
| 20811       | CakSNP20811    | <i>Kabuli</i>    | Ca_Kabuli_denovo             | 13868494                       | (C/G)       |
| 20812       | CakSNP20812    | <i>Kabuli</i>    | Ca_Kabuli_denovo             | 13868588                       | (G/A)       |
| 20813       | CakSNP20813    | <i>Kabuli</i>    | Ca_Kabuli_denovo             | 13870026                       | (T/C)       |
| 20814       | CakSNP20814    | <i>Kabuli</i>    | Ca_Kabuli_denovo             | 13870068                       | (A/C)       |
| 20815       | CakSNP20815    | <i>Kabuli</i>    | Ca_Kabuli_denovo             | 13878412                       | (A/C)       |
| 20816       | CakSNP20816    | <i>Kabuli</i>    | Ca_Kabuli_denovo             | 13879822                       | (G/T)       |
| 20817       | CakSNP20817    | <i>Kabuli</i>    | Ca_Kabuli_denovo             | 13882414                       | (G/A)       |
| 20818       | CakSNP20818    | <i>Kabuli</i>    | Ca_Kabuli_denovo             | 13882450                       | (T/C)       |
| 20819       | CakSNP20819    | <i>Kabuli</i>    | Ca_Kabuli_denovo             | 13884785                       | (T/C)       |
| 20820       | CakSNP20820    | <i>Kabuli</i>    | Ca_Kabuli_denovo             | 13885854                       | (T/C)       |
| 20821       | CakSNP20821    | <i>Kabuli</i>    | Ca_Kabuli_denovo             | 13892083                       | (A/G)       |
| 20822       | CakSNP20822    | <i>Kabuli</i>    | Ca_Kabuli_denovo             | 13892084                       | (C/A)       |
| 20823       | CakSNP20823    | <i>Kabuli</i>    | Ca_Kabuli_denovo             | 13898027                       | (G/A)       |

| <b>S.N.</b> | <b>SNP IDs</b> | <b>Cultivars</b> | <b>Chromosomes/scaffolds</b> | <b>Physical positions (bp)</b> | <b>SNPs</b> |
|-------------|----------------|------------------|------------------------------|--------------------------------|-------------|
| 20824       | CakSNP20824    | <i>Kabuli</i>    | Ca_Kabuli_denovo             | 13901395                       | (T/C)       |
| 20825       | CakSNP20825    | <i>Kabuli</i>    | Ca_Kabuli_denovo             | 13902570                       | (A/C)       |
| 20826       | CakSNP20826    | <i>Kabuli</i>    | Ca_Kabuli_denovo             | 13902571                       | (A/G)       |
| 20827       | CakSNP20827    | <i>Kabuli</i>    | Ca_Kabuli_denovo             | 13911052                       | (T/A)       |
| 20828       | CakSNP20828    | <i>Kabuli</i>    | Ca_Kabuli_denovo             | 13911082                       | (G/A)       |
| 20829       | CakSNP20829    | <i>Kabuli</i>    | Ca_Kabuli_denovo             | 13912343                       | (T/C)       |
| 20830       | CakSNP20830    | <i>Kabuli</i>    | Ca_Kabuli_denovo             | 13912361                       | (A/G)       |
| 20831       | CakSNP20831    | <i>Kabuli</i>    | Ca_Kabuli_denovo             | 13915445                       | (G/A)       |
| 20832       | CakSNP20832    | <i>Kabuli</i>    | Ca_Kabuli_denovo             | 13928830                       | (C/T)       |
| 20833       | CakSNP20833    | <i>Kabuli</i>    | Ca_Kabuli_denovo             | 13935332                       | (G/A)       |
| 20834       | CakSNP20834    | <i>Kabuli</i>    | Ca_Kabuli_denovo             | 13938219                       | (G/A)       |
| 20835       | CakSNP20835    | <i>Kabuli</i>    | Ca_Kabuli_denovo             | 13938220                       | (G/A)       |
| 20836       | CakSNP20836    | <i>Kabuli</i>    | Ca_Kabuli_denovo             | 13942437                       | (G/A)       |
| 20837       | CakSNP20837    | <i>Kabuli</i>    | Ca_Kabuli_denovo             | 13942467                       | (G/A)       |
| 20838       | CakSNP20838    | <i>Kabuli</i>    | Ca_Kabuli_denovo             | 13945517                       | (C/T)       |
| 20839       | CakSNP20839    | <i>Kabuli</i>    | Ca_Kabuli_denovo             | 13948830                       | (T/C)       |
| 20840       | CakSNP20840    | <i>Kabuli</i>    | Ca_Kabuli_denovo             | 13955773                       | (T/C)       |
| 20841       | CakSNP20841    | <i>Kabuli</i>    | Ca_Kabuli_denovo             | 13955776                       | (G/C)       |
| 20842       | CakSNP20842    | <i>Kabuli</i>    | Ca_Kabuli_denovo             | 13958314                       | (A/T)       |
| 20843       | CakSNP20843    | <i>Kabuli</i>    | Ca_Kabuli_denovo             | 13960720                       | (C/T)       |
| 20844       | CakSNP20844    | <i>Kabuli</i>    | Ca_Kabuli_denovo             | 13963694                       | (C/A)       |
| 20845       | CakSNP20845    | <i>Kabuli</i>    | Ca_Kabuli_denovo             | 13963760                       | (A/G)       |
| 20846       | CakSNP20846    | <i>Kabuli</i>    | Ca_Kabuli_denovo             | 13965291                       | (C/G)       |
| 20847       | CakSNP20847    | <i>Kabuli</i>    | Ca_Kabuli_denovo             | 13965316                       | (C/T)       |
| 20848       | CakSNP20848    | <i>Kabuli</i>    | Ca_Kabuli_denovo             | 13974263                       | (G/A)       |
| 20849       | CakSNP20849    | <i>Kabuli</i>    | Ca_Kabuli_denovo             | 13977184                       | (G/A)       |
| 20850       | CakSNP20850    | <i>Kabuli</i>    | Ca_Kabuli_denovo             | 13978845                       | (A/G)       |
| 20851       | CakSNP20851    | <i>Kabuli</i>    | Ca_Kabuli_denovo             | 13978865                       | (A/G)       |
| 20852       | CakSNP20852    | <i>Kabuli</i>    | Ca_Kabuli_denovo             | 13978866                       | (C/G)       |
| 20853       | CakSNP20853    | <i>Kabuli</i>    | Ca_Kabuli_denovo             | 13980992                       | (G/A)       |
| 20854       | CakSNP20854    | <i>Kabuli</i>    | Ca_Kabuli_denovo             | 13981007                       | (T/C)       |
| 20855       | CakSNP20855    | <i>Kabuli</i>    | Ca_Kabuli_denovo             | 13988791                       | (G/C)       |
| 20856       | CakSNP20856    | <i>Kabuli</i>    | Ca_Kabuli_denovo             | 13988810                       | (C/G)       |
| 20857       | CakSNP20857    | <i>Kabuli</i>    | Ca_Kabuli_denovo             | 13989848                       | (A/G)       |
| 20858       | CakSNP20858    | <i>Kabuli</i>    | Ca_Kabuli_denovo             | 13989891                       | (G/A)       |
| 20859       | CakSNP20859    | <i>Kabuli</i>    | Ca_Kabuli_denovo             | 13991399                       | (T/C)       |
| 20860       | CakSNP20860    | <i>Kabuli</i>    | Ca_Kabuli_denovo             | 13991444                       | (A/G)       |
| 20861       | CakSNP20861    | <i>Kabuli</i>    | Ca_Kabuli_denovo             | 13991699                       | (A/G)       |

| <b>S.N.</b> | <b>SNP IDs</b> | <b>Cultivars</b> | <b>Chromosomes/scaffolds</b> | <b>Physical positions (bp)</b> | <b>SNPs</b> |
|-------------|----------------|------------------|------------------------------|--------------------------------|-------------|
| 20862       | CakSNP20862    | <i>Kabuli</i>    | Ca_Kabuli_denovo             | 13993112                       | (G/A)       |
| 20863       | CakSNP20863    | <i>Kabuli</i>    | Ca_Kabuli_denovo             | 13994280                       | (C/T)       |
| 20864       | CakSNP20864    | <i>Kabuli</i>    | Ca_Kabuli_denovo             | 13994560                       | (C/G)       |
| 20865       | CakSNP20865    | <i>Kabuli</i>    | Ca_Kabuli_denovo             | 13994609                       | (A/G)       |
| 20866       | CakSNP20866    | <i>Kabuli</i>    | Ca_Kabuli_denovo             | 13997710                       | (C/A)       |
| 20867       | CakSNP20867    | <i>Kabuli</i>    | Ca_Kabuli_denovo             | 14013165                       | (T/C)       |
| 20868       | CakSNP20868    | <i>Kabuli</i>    | Ca_Kabuli_denovo             | 14024171                       | (A/G)       |
| 20869       | CakSNP20869    | <i>Kabuli</i>    | Ca_Kabuli_denovo             | 14024173                       | (T/C)       |
| 20870       | CakSNP20870    | <i>Kabuli</i>    | Ca_Kabuli_denovo             | 14031255                       | (G/C)       |
| 20871       | CakSNP20871    | <i>Kabuli</i>    | Ca_Kabuli_denovo             | 14031282                       | (A/G)       |
| 20872       | CakSNP20872    | <i>Kabuli</i>    | Ca_Kabuli_denovo             | 14038882                       | (A/G)       |
| 20873       | CakSNP20873    | <i>Kabuli</i>    | Ca_Kabuli_denovo             | 14047682                       | (A/G)       |
| 20874       | CakSNP20874    | <i>Kabuli</i>    | Ca_Kabuli_denovo             | 14047694                       | (G/A)       |
| 20875       | CakSNP20875    | <i>Kabuli</i>    | Ca_Kabuli_denovo             | 14051292                       | (C/A)       |
| 20876       | CakSNP20876    | <i>Kabuli</i>    | Ca_Kabuli_denovo             | 14054007                       | (C/T)       |
| 20877       | CakSNP20877    | <i>Kabuli</i>    | Ca_Kabuli_denovo             | 14054913                       | (C/T)       |
| 20878       | CakSNP20878    | <i>Kabuli</i>    | Ca_Kabuli_denovo             | 14063953                       | (G/C)       |
| 20879       | CakSNP20879    | <i>Kabuli</i>    | Ca_Kabuli_denovo             | 14069422                       | (A/G)       |
| 20880       | CakSNP20880    | <i>Kabuli</i>    | Ca_Kabuli_denovo             | 14069482                       | (C/T)       |
| 20881       | CakSNP20881    | <i>Kabuli</i>    | Ca_Kabuli_denovo             | 14070071                       | (A/G)       |
| 20882       | CakSNP20882    | <i>Kabuli</i>    | Ca_Kabuli_denovo             | 14070080                       | (T/C)       |
| 20883       | CakSNP20883    | <i>Kabuli</i>    | Ca_Kabuli_denovo             | 14090644                       | (C/G)       |
| 20884       | CakSNP20884    | <i>Kabuli</i>    | Ca_Kabuli_denovo             | 14094627                       | (C/T)       |
| 20885       | CakSNP20885    | <i>Kabuli</i>    | Ca_Kabuli_denovo             | 14094666                       | (A/G)       |
| 20886       | CakSNP20886    | <i>Kabuli</i>    | Ca_Kabuli_denovo             | 14095149                       | (T/G)       |
| 20887       | CakSNP20887    | <i>Kabuli</i>    | Ca_Kabuli_denovo             | 14097307                       | (T/G)       |
| 20888       | CakSNP20888    | <i>Kabuli</i>    | Ca_Kabuli_denovo             | 14097992                       | (G/A)       |
| 20889       | CakSNP20889    | <i>Kabuli</i>    | Ca_Kabuli_denovo             | 14099100                       | (A/G)       |
| 20890       | CakSNP20890    | <i>Kabuli</i>    | Ca_Kabuli_denovo             | 14101707                       | (G/C)       |
| 20891       | CakSNP20891    | <i>Kabuli</i>    | Ca_Kabuli_denovo             | 14102440                       | (C/T)       |
| 20892       | CakSNP20892    | <i>Kabuli</i>    | Ca_Kabuli_denovo             | 14102489                       | (G/T)       |
| 20893       | CakSNP20893    | <i>Kabuli</i>    | Ca_Kabuli_denovo             | 14104688                       | (T/A)       |
| 20894       | CakSNP20894    | <i>Kabuli</i>    | Ca_Kabuli_denovo             | 14109844                       | (G/A)       |
| 20895       | CakSNP20895    | <i>Kabuli</i>    | Ca_Kabuli_denovo             | 14109866                       | (A/C)       |
| 20896       | CakSNP20896    | <i>Kabuli</i>    | Ca_Kabuli_denovo             | 14109868                       | (A/C)       |
| 20897       | CakSNP20897    | <i>Kabuli</i>    | Ca_Kabuli_denovo             | 14112239                       | (C/T)       |
| 20898       | CakSNP20898    | <i>Kabuli</i>    | Ca_Kabuli_denovo             | 14112675                       | (G/T)       |
| 20899       | CakSNP20899    | <i>Kabuli</i>    | Ca_Kabuli_denovo             | 14112693                       | (C/T)       |



| <b>S.N.</b> | <b>SNP IDs</b> | <b>Cultivars</b> | <b>Chromosomes/scaffolds</b> | <b>Physical positions (bp)</b> | <b>SNPs</b> |
|-------------|----------------|------------------|------------------------------|--------------------------------|-------------|
| 20900       | CakSNP20900    | <i>Kabuli</i>    | Ca_Kabuli_denovo             | 14115751                       | (C/T)       |
| 20901       | CakSNP20901    | <i>Kabuli</i>    | Ca_Kabuli_denovo             | 14121780                       | (G/T)       |
| 20902       | CakSNP20902    | <i>Kabuli</i>    | Ca_Kabuli_denovo             | 14121828                       | (C/T)       |
| 20903       | CakSNP20903    | <i>Kabuli</i>    | Ca_Kabuli_denovo             | 14123266                       | (C/T)       |
| 20904       | CakSNP20904    | <i>Kabuli</i>    | Ca_Kabuli_denovo             | 14132147                       | (C/G)       |
| 20905       | CakSNP20905    | <i>Kabuli</i>    | Ca_Kabuli_denovo             | 14134459                       | (C/T)       |
| 20906       | CakSNP20906    | <i>Kabuli</i>    | Ca_Kabuli_denovo             | 14136009                       | (A/G)       |
| 20907       | CakSNP20907    | <i>Kabuli</i>    | Ca_Kabuli_denovo             | 14136078                       | (A/G)       |
| 20908       | CakSNP20908    | <i>Kabuli</i>    | Ca_Kabuli_denovo             | 14141764                       | (T/C)       |
| 20909       | CakSNP20909    | <i>Kabuli</i>    | Ca_Kabuli_denovo             | 14146205                       | (T/C)       |
| 20910       | CakSNP20910    | <i>Kabuli</i>    | Ca_Kabuli_denovo             | 14146512                       | (A/T)       |
| 20911       | CakSNP20911    | <i>Kabuli</i>    | Ca_Kabuli_denovo             | 14146533                       | (C/T)       |
| 20912       | CakSNP20912    | <i>Kabuli</i>    | Ca_Kabuli_denovo             | 14151634                       | (A/G)       |
| 20913       | CakSNP20913    | <i>Kabuli</i>    | Ca_Kabuli_denovo             | 14162150                       | (G/C)       |
| 20914       | CakSNP20914    | <i>Kabuli</i>    | Ca_Kabuli_denovo             | 14162186                       | (G/A)       |
| 20915       | CakSNP20915    | <i>Kabuli</i>    | Ca_Kabuli_denovo             | 14162459                       | (C/T)       |
| 20916       | CakSNP20916    | <i>Kabuli</i>    | Ca_Kabuli_denovo             | 14165612                       | (A/G)       |
| 20917       | CakSNP20917    | <i>Kabuli</i>    | Ca_Kabuli_denovo             | 14170796                       | (C/T)       |
| 20918       | CakSNP20918    | <i>Kabuli</i>    | Ca_Kabuli_denovo             | 14170853                       | (G/A)       |
| 20919       | CakSNP20919    | <i>Kabuli</i>    | Ca_Kabuli_denovo             | 14173237                       | (C/T)       |
| 20920       | CakSNP20920    | <i>Kabuli</i>    | Ca_Kabuli_denovo             | 14175735                       | (C/G)       |
| 20921       | CakSNP20921    | <i>Kabuli</i>    | Ca_Kabuli_denovo             | 14178519                       | (A/C)       |
| 20922       | CakSNP20922    | <i>Kabuli</i>    | Ca_Kabuli_denovo             | 14178529                       | (C/T)       |
| 20923       | CakSNP20923    | <i>Kabuli</i>    | Ca_Kabuli_denovo             | 14180447                       | (A/G)       |
| 20924       | CakSNP20924    | <i>Kabuli</i>    | Ca_Kabuli_denovo             | 14186276                       | (T/C)       |
| 20925       | CakSNP20925    | <i>Kabuli</i>    | Ca_Kabuli_denovo             | 14188666                       | (T/C)       |
| 20926       | CakSNP20926    | <i>Kabuli</i>    | Ca_Kabuli_denovo             | 14204954                       | (T/C)       |
| 20927       | CakSNP20927    | <i>Kabuli</i>    | Ca_Kabuli_denovo             | 14204970                       | (A/G)       |
| 20928       | CakSNP20928    | <i>Kabuli</i>    | Ca_Kabuli_denovo             | 14210876                       | (A/G)       |
| 20929       | CakSNP20929    | <i>Kabuli</i>    | Ca_Kabuli_denovo             | 14210938                       | (C/T)       |
| 20930       | CakSNP20930    | <i>Kabuli</i>    | Ca_Kabuli_denovo             | 14219449                       | (A/G)       |
| 20931       | CakSNP20931    | <i>Kabuli</i>    | Ca_Kabuli_denovo             | 14219489                       | (G/A)       |
| 20932       | CakSNP20932    | <i>Kabuli</i>    | Ca_Kabuli_denovo             | 14219623                       | (T/C)       |
| 20933       | CakSNP20933    | <i>Kabuli</i>    | Ca_Kabuli_denovo             | 14221319                       | (G/A)       |
| 20934       | CakSNP20934    | <i>Kabuli</i>    | Ca_Kabuli_denovo             | 14221501                       | (T/C)       |
| 20935       | CakSNP20935    | <i>Kabuli</i>    | Ca_Kabuli_denovo             | 14229007                       | (C/A)       |
| 20936       | CakSNP20936    | <i>Kabuli</i>    | Ca_Kabuli_denovo             | 14231935                       | (T/C)       |
| 20937       | CakSNP20937    | <i>Kabuli</i>    | Ca_Kabuli_denovo             | 14231950                       | (G/T)       |

| <b>S.N.</b> | <b>SNP IDs</b> | <b>Cultivars</b> | <b>Chromosomes/scaffolds</b> | <b>Physical positions (bp)</b> | <b>SNPs</b> |
|-------------|----------------|------------------|------------------------------|--------------------------------|-------------|
| 20938       | CakSNP20938    | <i>Kabuli</i>    | Ca_Kabuli_denovo             | 14235265                       | (T/G)       |
| 20939       | CakSNP20939    | <i>Kabuli</i>    | Ca_Kabuli_denovo             | 14237166                       | (G/A)       |
| 20940       | CakSNP20940    | <i>Kabuli</i>    | Ca_Kabuli_denovo             | 14237557                       | (A/C)       |
| 20941       | CakSNP20941    | <i>Kabuli</i>    | Ca_Kabuli_denovo             | 14241384                       | (A/G)       |
| 20942       | CakSNP20942    | <i>Kabuli</i>    | Ca_Kabuli_denovo             | 14244846                       | (A/G)       |
| 20943       | CakSNP20943    | <i>Kabuli</i>    | Ca_Kabuli_denovo             | 14246524                       | (T/G)       |
| 20944       | CakSNP20944    | <i>Kabuli</i>    | Ca_Kabuli_denovo             | 14251791                       | (G/C)       |
| 20945       | CakSNP20945    | <i>Kabuli</i>    | Ca_Kabuli_denovo             | 14251806                       | (A/G)       |
| 20946       | CakSNP20946    | <i>Kabuli</i>    | Ca_Kabuli_denovo             | 14255378                       | (G/A)       |
| 20947       | CakSNP20947    | <i>Kabuli</i>    | Ca_Kabuli_denovo             | 14257965                       | (C/A)       |
| 20948       | CakSNP20948    | <i>Kabuli</i>    | Ca_Kabuli_denovo             | 14264833                       | (G/C)       |
| 20949       | CakSNP20949    | <i>Kabuli</i>    | Ca_Kabuli_denovo             | 14264890                       | (T/C)       |
| 20950       | CakSNP20950    | <i>Kabuli</i>    | Ca_Kabuli_denovo             | 14265359                       | (A/G)       |
| 20951       | CakSNP20951    | <i>Kabuli</i>    | Ca_Kabuli_denovo             | 14275421                       | (G/T)       |
| 20952       | CakSNP20952    | <i>Kabuli</i>    | Ca_Kabuli_denovo             | 14276179                       | (C/T)       |
| 20953       | CakSNP20953    | <i>Kabuli</i>    | Ca_Kabuli_denovo             | 14276201                       | (G/A)       |
| 20954       | CakSNP20954    | <i>Kabuli</i>    | Ca_Kabuli_denovo             | 14282422                       | (T/G)       |
| 20955       | CakSNP20955    | <i>Kabuli</i>    | Ca_Kabuli_denovo             | 14282784                       | (G/A)       |
| 20956       | CakSNP20956    | <i>Kabuli</i>    | Ca_Kabuli_denovo             | 14282796                       | (G/A)       |
| 20957       | CakSNP20957    | <i>Kabuli</i>    | Ca_Kabuli_denovo             | 14286253                       | (T/C)       |
| 20958       | CakSNP20958    | <i>Kabuli</i>    | Ca_Kabuli_denovo             | 14286269                       | (T/C)       |
| 20959       | CakSNP20959    | <i>Kabuli</i>    | Ca_Kabuli_denovo             | 14289279                       | (C/G)       |
| 20960       | CakSNP20960    | <i>Kabuli</i>    | Ca_Kabuli_denovo             | 14289309                       | (A/G)       |
| 20961       | CakSNP20961    | <i>Kabuli</i>    | Ca_Kabuli_denovo             | 14292246                       | (C/G)       |
| 20962       | CakSNP20962    | <i>Kabuli</i>    | Ca_Kabuli_denovo             | 14296223                       | (C/T)       |
| 20963       | CakSNP20963    | <i>Kabuli</i>    | Ca_Kabuli_denovo             | 14297461                       | (G/C)       |
| 20964       | CakSNP20964    | <i>Kabuli</i>    | Ca_Kabuli_denovo             | 14297530                       | (G/C)       |
| 20965       | CakSNP20965    | <i>Kabuli</i>    | Ca_Kabuli_denovo             | 14303045                       | (C/T)       |
| 20966       | CakSNP20966    | <i>Kabuli</i>    | Ca_Kabuli_denovo             | 14307152                       | (A/G)       |
| 20967       | CakSNP20967    | <i>Kabuli</i>    | Ca_Kabuli_denovo             | 14308158                       | (C/G)       |
| 20968       | CakSNP20968    | <i>Kabuli</i>    | Ca_Kabuli_denovo             | 14308820                       | (C/T)       |
| 20969       | CakSNP20969    | <i>Kabuli</i>    | Ca_Kabuli_denovo             | 14310581                       | (A/C)       |
| 20970       | CakSNP20970    | <i>Kabuli</i>    | Ca_Kabuli_denovo             | 14310632                       | (T/C)       |
| 20971       | CakSNP20971    | <i>Kabuli</i>    | Ca_Kabuli_denovo             | 14311760                       | (A/G)       |
| 20972       | CakSNP20972    | <i>Kabuli</i>    | Ca_Kabuli_denovo             | 14313417                       | (C/G)       |
| 20973       | CakSNP20973    | <i>Kabuli</i>    | Ca_Kabuli_denovo             | 14320707                       | (G/A)       |
| 20974       | CakSNP20974    | <i>Kabuli</i>    | Ca_Kabuli_denovo             | 14320709                       | (T/A)       |
| 20975       | CakSNP20975    | <i>Kabuli</i>    | Ca_Kabuli_denovo             | 14328623                       | (A/C)       |

| <b>S.N.</b> | <b>SNP IDs</b> | <b>Cultivars</b> | <b>Chromosomes/scaffolds</b> | <b>Physical positions (bp)</b> | <b>SNPs</b> |
|-------------|----------------|------------------|------------------------------|--------------------------------|-------------|
| 20976       | CakSNP20976    | <i>Kabuli</i>    | Ca_Kabuli_denovo             | 14328917                       | (G/T)       |
| 20977       | CakSNP20977    | <i>Kabuli</i>    | Ca_Kabuli_denovo             | 14333931                       | (A/G)       |
| 20978       | CakSNP20978    | <i>Kabuli</i>    | Ca_Kabuli_denovo             | 14337745                       | (A/G)       |
| 20979       | CakSNP20979    | <i>Kabuli</i>    | Ca_Kabuli_denovo             | 14337746                       | (T/C)       |
| 20980       | CakSNP20980    | <i>Kabuli</i>    | Ca_Kabuli_denovo             | 14341574                       | (A/G)       |
| 20981       | CakSNP20981    | <i>Kabuli</i>    | Ca_Kabuli_denovo             | 14341617                       | (A/C)       |
| 20982       | CakSNP20982    | <i>Kabuli</i>    | Ca_Kabuli_denovo             | 14346701                       | (A/G)       |
| 20983       | CakSNP20983    | <i>Kabuli</i>    | Ca_Kabuli_denovo             | 14346747                       | (G/T)       |
| 20984       | CakSNP20984    | <i>Kabuli</i>    | Ca_Kabuli_denovo             | 14347271                       | (T/C)       |
| 20985       | CakSNP20985    | <i>Kabuli</i>    | Ca_Kabuli_denovo             | 14348435                       | (A/T)       |
| 20986       | CakSNP20986    | <i>Kabuli</i>    | Ca_Kabuli_denovo             | 14352328                       | (T/C)       |
| 20987       | CakSNP20987    | <i>Kabuli</i>    | Ca_Kabuli_denovo             | 14352669                       | (A/G)       |
| 20988       | CakSNP20988    | <i>Kabuli</i>    | Ca_Kabuli_denovo             | 14353348                       | (G/T)       |
| 20989       | CakSNP20989    | <i>Kabuli</i>    | Ca_Kabuli_denovo             | 14353366                       | (G/A)       |
| 20990       | CakSNP20990    | <i>Kabuli</i>    | Ca_Kabuli_denovo             | 14364703                       | (C/G)       |
| 20991       | CakSNP20991    | <i>Kabuli</i>    | Ca_Kabuli_denovo             | 14369102                       | (C/G)       |
| 20992       | CakSNP20992    | <i>Kabuli</i>    | Ca_Kabuli_denovo             | 14369921                       | (T/C)       |
| 20993       | CakSNP20993    | <i>Kabuli</i>    | Ca_Kabuli_denovo             | 14380810                       | (C/G)       |
| 20994       | CakSNP20994    | <i>Kabuli</i>    | Ca_Kabuli_denovo             | 14380823                       | (T/C)       |
| 20995       | CakSNP20995    | <i>Kabuli</i>    | Ca_Kabuli_denovo             | 14383046                       | (C/T)       |
| 20996       | CakSNP20996    | <i>Kabuli</i>    | Ca_Kabuli_denovo             | 14388649                       | (G/A)       |
| 20997       | CakSNP20997    | <i>Kabuli</i>    | Ca_Kabuli_denovo             | 14388663                       | (T/A)       |
| 20998       | CakSNP20998    | <i>Kabuli</i>    | Ca_Kabuli_denovo             | 14394158                       | (C/T)       |
| 20999       | CakSNP20999    | <i>Kabuli</i>    | Ca_Kabuli_denovo             | 14397942                       | (G/A)       |
| 21000       | CakSNP21000    | <i>Kabuli</i>    | Ca_Kabuli_denovo             | 14401170                       | (T/C)       |
| 21001       | CakSNP21001    | <i>Kabuli</i>    | Ca_Kabuli_denovo             | 14402239                       | (T/G)       |
| 21002       | CakSNP21002    | <i>Kabuli</i>    | Ca_Kabuli_denovo             | 14403229                       | (T/G)       |
| 21003       | CakSNP21003    | <i>Kabuli</i>    | Ca_Kabuli_denovo             | 14405364                       | (C/T)       |
| 21004       | CakSNP21004    | <i>Kabuli</i>    | Ca_Kabuli_denovo             | 14405406                       | (T/C)       |
| 21005       | CakSNP21005    | <i>Kabuli</i>    | Ca_Kabuli_denovo             | 14406925                       | (C/G)       |
| 21006       | CakSNP21006    | <i>Kabuli</i>    | Ca_Kabuli_denovo             | 14406958                       | (A/G)       |
| 21007       | CakSNP21007    | <i>Kabuli</i>    | Ca_Kabuli_denovo             | 14406974                       | (G/C)       |
| 21008       | CakSNP21008    | <i>Kabuli</i>    | Ca_Kabuli_denovo             | 14407215                       | (C/A)       |
| 21009       | CakSNP21009    | <i>Kabuli</i>    | Ca_Kabuli_denovo             | 14407218                       | (T/C)       |
| 21010       | CakSNP21010    | <i>Kabuli</i>    | Ca_Kabuli_denovo             | 14414831                       | (A/C)       |
| 21011       | CakSNP21011    | <i>Kabuli</i>    | Ca_Kabuli_denovo             | 14416795                       | (G/A)       |
| 21012       | CakSNP21012    | <i>Kabuli</i>    | Ca_Kabuli_denovo             | 14429719                       | (T/C)       |
| 21013       | CakSNP21013    | <i>Kabuli</i>    | Ca_Kabuli_denovo             | 14433591                       | (C/T)       |

| <b>S.N.</b> | <b>SNP IDs</b> | <b>Cultivars</b> | <b>Chromosomes/scaffolds</b> | <b>Physical positions (bp)</b> | <b>SNPs</b> |
|-------------|----------------|------------------|------------------------------|--------------------------------|-------------|
| 21014       | CakSNP21014    | <i>Kabuli</i>    | Ca_Kabuli_denovo             | 14437122                       | (T/G)       |
| 21015       | CakSNP21015    | <i>Kabuli</i>    | Ca_Kabuli_denovo             | 14437433                       | (T/C)       |
| 21016       | CakSNP21016    | <i>Kabuli</i>    | Ca_Kabuli_denovo             | 14442419                       | (T/C)       |
| 21017       | CakSNP21017    | <i>Kabuli</i>    | Ca_Kabuli_denovo             | 14442430                       | (C/T)       |
| 21018       | CakSNP21018    | <i>Kabuli</i>    | Ca_Kabuli_denovo             | 14443760                       | (T/G)       |
| 21019       | CakSNP21019    | <i>Kabuli</i>    | Ca_Kabuli_denovo             | 14443778                       | (A/G)       |
| 21020       | CakSNP21020    | <i>Kabuli</i>    | Ca_Kabuli_denovo             | 14444490                       | (T/C)       |
| 21021       | CakSNP21021    | <i>Kabuli</i>    | Ca_Kabuli_denovo             | 14444536                       | (C/G)       |
| 21022       | CakSNP21022    | <i>Kabuli</i>    | Ca_Kabuli_denovo             | 14445505                       | (A/C)       |
| 21023       | CakSNP21023    | <i>Kabuli</i>    | Ca_Kabuli_denovo             | 14448509                       | (T/G)       |
| 21024       | CakSNP21024    | <i>Kabuli</i>    | Ca_Kabuli_denovo             | 14449521                       | (A/T)       |
| 21025       | CakSNP21025    | <i>Kabuli</i>    | Ca_Kabuli_denovo             | 14449530                       | (G/A)       |
| 21026       | CakSNP21026    | <i>Kabuli</i>    | Ca_Kabuli_denovo             | 14452270                       | (T/C)       |
| 21027       | CakSNP21027    | <i>Kabuli</i>    | Ca_Kabuli_denovo             | 14457529                       | (C/T)       |
| 21028       | CakSNP21028    | <i>Kabuli</i>    | Ca_Kabuli_denovo             | 14467081                       | (T/G)       |
| 21029       | CakSNP21029    | <i>Kabuli</i>    | Ca_Kabuli_denovo             | 14469056                       | (T/C)       |
| 21030       | CakSNP21030    | <i>Kabuli</i>    | Ca_Kabuli_denovo             | 14469127                       | (C/G)       |
| 21031       | CakSNP21031    | <i>Kabuli</i>    | Ca_Kabuli_denovo             | 14469420                       | (A/G)       |
| 21032       | CakSNP21032    | <i>Kabuli</i>    | Ca_Kabuli_denovo             | 14483569                       | (C/T)       |
| 21033       | CakSNP21033    | <i>Kabuli</i>    | Ca_Kabuli_denovo             | 14495553                       | (A/G)       |
| 21034       | CakSNP21034    | <i>Kabuli</i>    | Ca_Kabuli_denovo             | 14495559                       | (T/G)       |
| 21035       | CakSNP21035    | <i>Kabuli</i>    | Ca_Kabuli_denovo             | 14513052                       | (T/C)       |
| 21036       | CakSNP21036    | <i>Kabuli</i>    | Ca_Kabuli_denovo             | 14513906                       | (G/T)       |
| 21037       | CakSNP21037    | <i>Kabuli</i>    | Ca_Kabuli_denovo             | 14514776                       | (T/A)       |
| 21038       | CakSNP21038    | <i>Kabuli</i>    | Ca_Kabuli_denovo             | 14514787                       | (T/C)       |
| 21039       | CakSNP21039    | <i>Kabuli</i>    | Ca_Kabuli_denovo             | 14515738                       | (G/C)       |
| 21040       | CakSNP21040    | <i>Kabuli</i>    | Ca_Kabuli_denovo             | 14530041                       | (A/C)       |
| 21041       | CakSNP21041    | <i>Kabuli</i>    | Ca_Kabuli_denovo             | 14537319                       | (T/C)       |
| 21042       | CakSNP21042    | <i>Kabuli</i>    | Ca_Kabuli_denovo             | 14543760                       | (C/T)       |
| 21043       | CakSNP21043    | <i>Kabuli</i>    | Ca_Kabuli_denovo             | 14546700                       | (A/G)       |
| 21044       | CakSNP21044    | <i>Kabuli</i>    | Ca_Kabuli_denovo             | 14547594                       | (C/T)       |
| 21045       | CakSNP21045    | <i>Kabuli</i>    | Ca_Kabuli_denovo             | 14550152                       | (G/A)       |
| 21046       | CakSNP21046    | <i>Kabuli</i>    | Ca_Kabuli_denovo             | 14551303                       | (G/T)       |
| 21047       | CakSNP21047    | <i>Kabuli</i>    | Ca_Kabuli_denovo             | 14561183                       | (A/G)       |
| 21048       | CakSNP21048    | <i>Kabuli</i>    | Ca_Kabuli_denovo             | 14562250                       | (C/T)       |
| 21049       | CakSNP21049    | <i>Kabuli</i>    | Ca_Kabuli_denovo             | 14566607                       | (A/G)       |
| 21050       | CakSNP21050    | <i>Kabuli</i>    | Ca_Kabuli_denovo             | 14570440                       | (C/G)       |
| 21051       | CakSNP21051    | <i>Kabuli</i>    | Ca_Kabuli_denovo             | 14570663                       | (G/T)       |

| <b>S.N.</b> | <b>SNP IDs</b> | <b>Cultivars</b> | <b>Chromosomes/scaffolds</b> | <b>Physical positions (bp)</b> | <b>SNPs</b> |
|-------------|----------------|------------------|------------------------------|--------------------------------|-------------|
| 21052       | CakSNP21052    | <i>Kabuli</i>    | Ca_Kabuli_denovo             | 14571952                       | (T/A)       |
| 21053       | CakSNP21053    | <i>Kabuli</i>    | Ca_Kabuli_denovo             | 14572744                       | (T/C)       |
| 21054       | CakSNP21054    | <i>Kabuli</i>    | Ca_Kabuli_denovo             | 14573976                       | (C/T)       |
| 21055       | CakSNP21055    | <i>Kabuli</i>    | Ca_Kabuli_denovo             | 14578027                       | (A/C)       |
| 21056       | CakSNP21056    | <i>Kabuli</i>    | Ca_Kabuli_denovo             | 14578231                       | (A/G)       |
| 21057       | CakSNP21057    | <i>Kabuli</i>    | Ca_Kabuli_denovo             | 14578249                       | (C/T)       |
| 21058       | CakSNP21058    | <i>Kabuli</i>    | Ca_Kabuli_denovo             | 14578273                       | (G/A)       |
| 21059       | CakSNP21059    | <i>Kabuli</i>    | Ca_Kabuli_denovo             | 14582337                       | (C/T)       |
| 21060       | CakSNP21060    | <i>Kabuli</i>    | Ca_Kabuli_denovo             | 14587510                       | (T/C)       |
| 21061       | CakSNP21061    | <i>Kabuli</i>    | Ca_Kabuli_denovo             | 14589670                       | (G/A)       |
| 21062       | CakSNP21062    | <i>Kabuli</i>    | Ca_Kabuli_denovo             | 14589693                       | (G/C)       |
| 21063       | CakSNP21063    | <i>Kabuli</i>    | Ca_Kabuli_denovo             | 14590243                       | (A/C)       |
| 21064       | CakSNP21064    | <i>Kabuli</i>    | Ca_Kabuli_denovo             | 14596822                       | (T/G)       |
| 21065       | CakSNP21065    | <i>Kabuli</i>    | Ca_Kabuli_denovo             | 14596886                       | (T/C)       |
| 21066       | CakSNP21066    | <i>Kabuli</i>    | Ca_Kabuli_denovo             | 14597698                       | (T/C)       |
| 21067       | CakSNP21067    | <i>Kabuli</i>    | Ca_Kabuli_denovo             | 14599704                       | (A/G)       |
| 21068       | CakSNP21068    | <i>Kabuli</i>    | Ca_Kabuli_denovo             | 14609759                       | (C/G)       |
| 21069       | CakSNP21069    | <i>Kabuli</i>    | Ca_Kabuli_denovo             | 14609792                       | (T/C)       |
| 21070       | CakSNP21070    | <i>Kabuli</i>    | Ca_Kabuli_denovo             | 14614842                       | (G/T)       |
| 21071       | CakSNP21071    | <i>Kabuli</i>    | Ca_Kabuli_denovo             | 14615031                       | (T/G)       |
| 21072       | CakSNP21072    | <i>Kabuli</i>    | Ca_Kabuli_denovo             | 14617523                       | (T/C)       |
| 21073       | CakSNP21073    | <i>Kabuli</i>    | Ca_Kabuli_denovo             | 14619462                       | (T/G)       |
| 21074       | CakSNP21074    | <i>Kabuli</i>    | Ca_Kabuli_denovo             | 14619490                       | (T/C)       |
| 21075       | CakSNP21075    | <i>Kabuli</i>    | Ca_Kabuli_denovo             | 14620013                       | (C/T)       |
| 21076       | CakSNP21076    | <i>Kabuli</i>    | Ca_Kabuli_denovo             | 14631563                       | (T/G)       |
| 21077       | CakSNP21077    | <i>Kabuli</i>    | Ca_Kabuli_denovo             | 14636201                       | (G/A)       |
| 21078       | CakSNP21078    | <i>Kabuli</i>    | Ca_Kabuli_denovo             | 14636204                       | (A/G)       |
| 21079       | CakSNP21079    | <i>Kabuli</i>    | Ca_Kabuli_denovo             | 14636266                       | (G/A)       |
| 21080       | CakSNP21080    | <i>Kabuli</i>    | Ca_Kabuli_denovo             | 14636270                       | (A/C)       |
| 21081       | CakSNP21081    | <i>Kabuli</i>    | Ca_Kabuli_denovo             | 14641177                       | (A/C)       |
| 21082       | CakSNP21082    | <i>Kabuli</i>    | Ca_Kabuli_denovo             | 14648080                       | (C/G)       |
| 21083       | CakSNP21083    | <i>Kabuli</i>    | Ca_Kabuli_denovo             | 14648723                       | (T/C)       |
| 21084       | CakSNP21084    | <i>Kabuli</i>    | Ca_Kabuli_denovo             | 14648727                       | (C/T)       |
| 21085       | CakSNP21085    | <i>Kabuli</i>    | Ca_Kabuli_denovo             | 14652198                       | (G/T)       |
| 21086       | CakSNP21086    | <i>Kabuli</i>    | Ca_Kabuli_denovo             | 14660915                       | (A/G)       |
| 21087       | CakSNP21087    | <i>Kabuli</i>    | Ca_Kabuli_denovo             | 14668713                       | (A/C)       |
| 21088       | CakSNP21088    | <i>Kabuli</i>    | Ca_Kabuli_denovo             | 14670691                       | (C/T)       |
| 21089       | CakSNP21089    | <i>Kabuli</i>    | Ca_Kabuli_denovo             | 14670709                       | (C/T)       |

| <b>S.N.</b> | <b>SNP IDs</b> | <b>Cultivars</b> | <b>Chromosomes/scaffolds</b> | <b>Physical positions (bp)</b> | <b>SNPs</b> |
|-------------|----------------|------------------|------------------------------|--------------------------------|-------------|
| 21090       | CakSNP21090    | <i>Kabuli</i>    | Ca_Kabuli_denovo             | 14673778                       | (T/C)       |
| 21091       | CakSNP21091    | <i>Kabuli</i>    | Ca_Kabuli_denovo             | 14682478                       | (C/G)       |
| 21092       | CakSNP21092    | <i>Kabuli</i>    | Ca_Kabuli_denovo             | 14682505                       | (T/C)       |
| 21093       | CakSNP21093    | <i>Kabuli</i>    | Ca_Kabuli_denovo             | 14685915                       | (G/A)       |
| 21094       | CakSNP21094    | <i>Kabuli</i>    | Ca_Kabuli_denovo             | 14689649                       | (G/C)       |
| 21095       | CakSNP21095    | <i>Kabuli</i>    | Ca_Kabuli_denovo             | 14696938                       | (A/G)       |
| 21096       | CakSNP21096    | <i>Kabuli</i>    | Ca_Kabuli_denovo             | 14698942                       | (T/C)       |
| 21097       | CakSNP21097    | <i>Kabuli</i>    | Ca_Kabuli_denovo             | 14703530                       | (C/G)       |
| 21098       | CakSNP21098    | <i>Kabuli</i>    | Ca_Kabuli_denovo             | 14703575                       | (A/G)       |
| 21099       | CakSNP21099    | <i>Kabuli</i>    | Ca_Kabuli_denovo             | 14704072                       | (T/C)       |
| 21100       | CakSNP21100    | <i>Kabuli</i>    | Ca_Kabuli_denovo             | 14704120                       | (T/C)       |
| 21101       | CakSNP21101    | <i>Kabuli</i>    | Ca_Kabuli_denovo             | 14704731                       | (C/T)       |
| 21102       | CakSNP21102    | <i>Kabuli</i>    | Ca_Kabuli_denovo             | 14704732                       | (T/C)       |
| 21103       | CakSNP21103    | <i>Kabuli</i>    | Ca_Kabuli_denovo             | 14715112                       | (A/G)       |
| 21104       | CakSNP21104    | <i>Kabuli</i>    | Ca_Kabuli_denovo             | 14715215                       | (G/A)       |
| 21105       | CakSNP21105    | <i>Kabuli</i>    | Ca_Kabuli_denovo             | 14715220                       | (C/G)       |
| 21106       | CakSNP21106    | <i>Kabuli</i>    | Ca_Kabuli_denovo             | 14726401                       | (A/G)       |
| 21107       | CakSNP21107    | <i>Kabuli</i>    | Ca_Kabuli_denovo             | 14728979                       | (G/T)       |
| 21108       | CakSNP21108    | <i>Kabuli</i>    | Ca_Kabuli_denovo             | 14729758                       | (C/G)       |
| 21109       | CakSNP21109    | <i>Kabuli</i>    | Ca_Kabuli_denovo             | 14729891                       | (A/T)       |
| 21110       | CakSNP21110    | <i>Kabuli</i>    | Ca_Kabuli_denovo             | 14735636                       | (T/G)       |
| 21111       | CakSNP21111    | <i>Kabuli</i>    | Ca_Kabuli_denovo             | 14736247                       | (A/G)       |
| 21112       | CakSNP21112    | <i>Kabuli</i>    | Ca_Kabuli_denovo             | 14736289                       | (C/T)       |
| 21113       | CakSNP21113    | <i>Kabuli</i>    | Ca_Kabuli_denovo             | 14741708                       | (A/C)       |
| 21114       | CakSNP21114    | <i>Kabuli</i>    | Ca_Kabuli_denovo             | 14743692                       | (C/G)       |
| 21115       | CakSNP21115    | <i>Kabuli</i>    | Ca_Kabuli_denovo             | 14743756                       | (T/A)       |
| 21116       | CakSNP21116    | <i>Kabuli</i>    | Ca_Kabuli_denovo             | 14745532                       | (A/C)       |
| 21117       | CakSNP21117    | <i>Kabuli</i>    | Ca_Kabuli_denovo             | 14746118                       | (A/G)       |
| 21118       | CakSNP21118    | <i>Kabuli</i>    | Ca_Kabuli_denovo             | 14746154                       | (A/G)       |
| 21119       | CakSNP21119    | <i>Kabuli</i>    | Ca_Kabuli_denovo             | 14748412                       | (G/A)       |
| 21120       | CakSNP21120    | <i>Kabuli</i>    | Ca_Kabuli_denovo             | 14748417                       | (G/C)       |
| 21121       | CakSNP21121    | <i>Kabuli</i>    | Ca_Kabuli_denovo             | 14749636                       | (G/A)       |
| 21122       | CakSNP21122    | <i>Kabuli</i>    | Ca_Kabuli_denovo             | 14749704                       | (T/G)       |
| 21123       | CakSNP21123    | <i>Kabuli</i>    | Ca_Kabuli_denovo             | 14749705                       | (G/T)       |
| 21124       | CakSNP21124    | <i>Kabuli</i>    | Ca_Kabuli_denovo             | 14752787                       | (T/C)       |
| 21125       | CakSNP21125    | <i>Kabuli</i>    | Ca_Kabuli_denovo             | 14755314                       | (C/T)       |
| 21126       | CakSNP21126    | <i>Kabuli</i>    | Ca_Kabuli_denovo             | 14757725                       | (C/G)       |
| 21127       | CakSNP21127    | <i>Kabuli</i>    | Ca_Kabuli_denovo             | 14759576                       | (C/T)       |

| <b>S.N.</b> | <b>SNP IDs</b> | <b>Cultivars</b> | <b>Chromosomes/scaffolds</b> | <b>Physical positions (bp)</b> | <b>SNPs</b> |
|-------------|----------------|------------------|------------------------------|--------------------------------|-------------|
| 21128       | CakSNP21128    | <i>Kabuli</i>    | Ca_Kabuli_denovo             | 14782372                       | (C/T)       |
| 21129       | CakSNP21129    | <i>Kabuli</i>    | Ca_Kabuli_denovo             | 14782399                       | (C/T)       |
| 21130       | CakSNP21130    | <i>Kabuli</i>    | Ca_Kabuli_denovo             | 14787071                       | (G/T)       |
| 21131       | CakSNP21131    | <i>Kabuli</i>    | Ca_Kabuli_denovo             | 14788336                       | (T/C)       |
| 21132       | CakSNP21132    | <i>Kabuli</i>    | Ca_Kabuli_denovo             | 14792248                       | (G/C)       |
| 21133       | CakSNP21133    | <i>Kabuli</i>    | Ca_Kabuli_denovo             | 14792775                       | (G/A)       |
| 21134       | CakSNP21134    | <i>Kabuli</i>    | Ca_Kabuli_denovo             | 14801212                       | (C/G)       |
| 21135       | CakSNP21135    | <i>Kabuli</i>    | Ca_Kabuli_denovo             | 14801218                       | (C/T)       |
| 21136       | CakSNP21136    | <i>Kabuli</i>    | Ca_Kabuli_denovo             | 14805457                       | (T/C)       |
| 21137       | CakSNP21137    | <i>Kabuli</i>    | Ca_Kabuli_denovo             | 14805477                       | (G/C)       |
| 21138       | CakSNP21138    | <i>Kabuli</i>    | Ca_Kabuli_denovo             | 14805855                       | (T/C)       |
| 21139       | CakSNP21139    | <i>Kabuli</i>    | Ca_Kabuli_denovo             | 14805865                       | (A/G)       |
| 21140       | CakSNP21140    | <i>Kabuli</i>    | Ca_Kabuli_denovo             | 14811884                       | (G/C)       |
| 21141       | CakSNP21141    | <i>Kabuli</i>    | Ca_Kabuli_denovo             | 14825428                       | (C/G)       |
| 21142       | CakSNP21142    | <i>Kabuli</i>    | Ca_Kabuli_denovo             | 14825440                       | (G/C)       |
| 21143       | CakSNP21143    | <i>Kabuli</i>    | Ca_Kabuli_denovo             | 14833055                       | (C/A)       |
| 21144       | CakSNP21144    | <i>Kabuli</i>    | Ca_Kabuli_denovo             | 14833103                       | (A/G)       |
| 21145       | CakSNP21145    | <i>Kabuli</i>    | Ca_Kabuli_denovo             | 14834045                       | (G/C)       |
| 21146       | CakSNP21146    | <i>Kabuli</i>    | Ca_Kabuli_denovo             | 14838314                       | (G/C)       |
| 21147       | CakSNP21147    | <i>Kabuli</i>    | Ca_Kabuli_denovo             | 14841355                       | (G/A)       |
| 21148       | CakSNP21148    | <i>Kabuli</i>    | Ca_Kabuli_denovo             | 14841976                       | (C/T)       |
| 21149       | CakSNP21149    | <i>Kabuli</i>    | Ca_Kabuli_denovo             | 14845633                       | (A/C)       |
| 21150       | CakSNP21150    | <i>Kabuli</i>    | Ca_Kabuli_denovo             | 14861241                       | (T/C)       |
| 21151       | CakSNP21151    | <i>Kabuli</i>    | Ca_Kabuli_denovo             | 14861255                       | (T/C)       |
| 21152       | CakSNP21152    | <i>Kabuli</i>    | Ca_Kabuli_denovo             | 14864054                       | (G/T)       |
| 21153       | CakSNP21153    | <i>Kabuli</i>    | Ca_Kabuli_denovo             | 14864425                       | (C/T)       |
| 21154       | CakSNP21154    | <i>Kabuli</i>    | Ca_Kabuli_denovo             | 14872625                       | (C/T)       |
| 21155       | CakSNP21155    | <i>Kabuli</i>    | Ca_Kabuli_denovo             | 14872631                       | (C/T)       |
| 21156       | CakSNP21156    | <i>Kabuli</i>    | Ca_Kabuli_denovo             | 14877101                       | (G/A)       |
| 21157       | CakSNP21157    | <i>Kabuli</i>    | Ca_Kabuli_denovo             | 14877962                       | (G/A)       |
| 21158       | CakSNP21158    | <i>Kabuli</i>    | Ca_Kabuli_denovo             | 14878041                       | (C/G)       |
| 21159       | CakSNP21159    | <i>Kabuli</i>    | Ca_Kabuli_denovo             | 14881946                       | (C/T)       |
| 21160       | CakSNP21160    | <i>Kabuli</i>    | Ca_Kabuli_denovo             | 14883255                       | (A/C)       |
| 21161       | CakSNP21161    | <i>Kabuli</i>    | Ca_Kabuli_denovo             | 14883746                       | (C/T)       |
| 21162       | CakSNP21162    | <i>Kabuli</i>    | Ca_Kabuli_denovo             | 14883748                       | (G/A)       |
| 21163       | CakSNP21163    | <i>Kabuli</i>    | Ca_Kabuli_denovo             | 14886823                       | (T/C)       |
| 21164       | CakSNP21164    | <i>Kabuli</i>    | Ca_Kabuli_denovo             | 14888070                       | (A/G)       |
| 21165       | CakSNP21165    | <i>Kabuli</i>    | Ca_Kabuli_denovo             | 14891224                       | (G/A)       |

| <b>S.N.</b> | <b>SNP IDs</b> | <b>Cultivars</b> | <b>Chromosomes/scaffolds</b> | <b>Physical positions (bp)</b> | <b>SNPs</b> |
|-------------|----------------|------------------|------------------------------|--------------------------------|-------------|
| 21166       | CakSNP21166    | <i>Kabuli</i>    | Ca_Kabuli_denovo             | 14893670                       | (A/C)       |
| 21167       | CakSNP21167    | <i>Kabuli</i>    | Ca_Kabuli_denovo             | 14893855                       | (T/G)       |
| 21168       | CakSNP21168    | <i>Kabuli</i>    | Ca_Kabuli_denovo             | 14895580                       | (A/C)       |
| 21169       | CakSNP21169    | <i>Kabuli</i>    | Ca_Kabuli_denovo             | 14898622                       | (C/T)       |
| 21170       | CakSNP21170    | <i>Kabuli</i>    | Ca_Kabuli_denovo             | 14898764                       | (C/A)       |
| 21171       | CakSNP21171    | <i>Kabuli</i>    | Ca_Kabuli_denovo             | 14899131                       | (T/G)       |
| 21172       | CakSNP21172    | <i>Kabuli</i>    | Ca_Kabuli_denovo             | 14899150                       | (T/C)       |
| 21173       | CakSNP21173    | <i>Kabuli</i>    | Ca_Kabuli_denovo             | 14899484                       | (T/C)       |
| 21174       | CakSNP21174    | <i>Kabuli</i>    | Ca_Kabuli_denovo             | 14905145                       | (C/G)       |
| 21175       | CakSNP21175    | <i>Kabuli</i>    | Ca_Kabuli_denovo             | 14906147                       | (C/G)       |
| 21176       | CakSNP21176    | <i>Kabuli</i>    | Ca_Kabuli_denovo             | 14907584                       | (C/T)       |
| 21177       | CakSNP21177    | <i>Kabuli</i>    | Ca_Kabuli_denovo             | 14909654                       | (T/G)       |
| 21178       | CakSNP21178    | <i>Kabuli</i>    | Ca_Kabuli_denovo             | 14909803                       | (T/G)       |
| 21179       | CakSNP21179    | <i>Kabuli</i>    | Ca_Kabuli_denovo             | 14912143                       | (A/G)       |
| 21180       | CakSNP21180    | <i>Kabuli</i>    | Ca_Kabuli_denovo             | 14912144                       | (A/G)       |
| 21181       | CakSNP21181    | <i>Kabuli</i>    | Ca_Kabuli_denovo             | 14913605                       | (C/T)       |
| 21182       | CakSNP21182    | <i>Kabuli</i>    | Ca_Kabuli_denovo             | 14914323                       | (G/A)       |
| 21183       | CakSNP21183    | <i>Kabuli</i>    | Ca_Kabuli_denovo             | 14916673                       | (T/C)       |
| 21184       | CakSNP21184    | <i>Kabuli</i>    | Ca_Kabuli_denovo             | 14916715                       | (A/G)       |
| 21185       | CakSNP21185    | <i>Kabuli</i>    | Ca_Kabuli_denovo             | 14918881                       | (G/C)       |
| 21186       | CakSNP21186    | <i>Kabuli</i>    | Ca_Kabuli_denovo             | 14926796                       | (A/G)       |
| 21187       | CakSNP21187    | <i>Kabuli</i>    | Ca_Kabuli_denovo             | 14927585                       | (T/C)       |
| 21188       | CakSNP21188    | <i>Kabuli</i>    | Ca_Kabuli_denovo             | 14929577                       | (A/C)       |
| 21189       | CakSNP21189    | <i>Kabuli</i>    | Ca_Kabuli_denovo             | 14935159                       | (C/A)       |
| 21190       | CakSNP21190    | <i>Kabuli</i>    | Ca_Kabuli_denovo             | 14942882                       | (A/G)       |
| 21191       | CakSNP21191    | <i>Kabuli</i>    | Ca_Kabuli_denovo             | 14942888                       | (A/C)       |
| 21192       | CakSNP21192    | <i>Kabuli</i>    | Ca_Kabuli_denovo             | 14943646                       | (G/A)       |
| 21193       | CakSNP21193    | <i>Kabuli</i>    | Ca_Kabuli_denovo             | 14950163                       | (T/G)       |
| 21194       | CakSNP21194    | <i>Kabuli</i>    | Ca_Kabuli_denovo             | 14962978                       | (T/C)       |
| 21195       | CakSNP21195    | <i>Kabuli</i>    | Ca_Kabuli_denovo             | 14968986                       | (C/A)       |
| 21196       | CakSNP21196    | <i>Kabuli</i>    | Ca_Kabuli_denovo             | 14971785                       | (C/T)       |
| 21197       | CakSNP21197    | <i>Kabuli</i>    | Ca_Kabuli_denovo             | 14974801                       | (G/A)       |
| 21198       | CakSNP21198    | <i>Kabuli</i>    | Ca_Kabuli_denovo             | 14974806                       | (G/A)       |
| 21199       | CakSNP21199    | <i>Kabuli</i>    | Ca_Kabuli_denovo             | 14977193                       | (T/C)       |
| 21200       | CakSNP21200    | <i>Kabuli</i>    | Ca_Kabuli_denovo             | 14978299                       | (A/C)       |
| 21201       | CakSNP21201    | <i>Kabuli</i>    | Ca_Kabuli_denovo             | 14981709                       | (C/T)       |
| 21202       | CakSNP21202    | <i>Kabuli</i>    | Ca_Kabuli_denovo             | 14981741                       | (A/G)       |
| 21203       | CakSNP21203    | <i>Kabuli</i>    | Ca_Kabuli_denovo             | 14982459                       | (G/A)       |



| <b>S.N.</b> | <b>SNP IDs</b> | <b>Cultivars</b> | <b>Chromosomes/scaffolds</b> | <b>Physical positions (bp)</b> | <b>SNPs</b> |
|-------------|----------------|------------------|------------------------------|--------------------------------|-------------|
| 21204       | CakSNP21204    | <i>Kabuli</i>    | Ca_Kabuli_denovo             | 14982465                       | (A/C)       |
| 21205       | CakSNP21205    | <i>Kabuli</i>    | Ca_Kabuli_denovo             | 14985193                       | (G/A)       |
| 21206       | CakSNP21206    | <i>Kabuli</i>    | Ca_Kabuli_denovo             | 14985249                       | (G/A)       |
| 21207       | CakSNP21207    | <i>Kabuli</i>    | Ca_Kabuli_denovo             | 14991461                       | (T/C)       |
| 21208       | CakSNP21208    | <i>Kabuli</i>    | Ca_Kabuli_denovo             | 14993274                       | (T/G)       |
| 21209       | CakSNP21209    | <i>Kabuli</i>    | Ca_Kabuli_denovo             | 14998061                       | (T/C)       |
| 21210       | CakSNP21210    | <i>Kabuli</i>    | Ca_Kabuli_denovo             | 15002955                       | (T/C)       |
| 21211       | CakSNP21211    | <i>Kabuli</i>    | Ca_Kabuli_denovo             | 15006029                       | (T/A)       |
| 21212       | CakSNP21212    | <i>Kabuli</i>    | Ca_Kabuli_denovo             | 15007070                       | (G/T)       |
| 21213       | CakSNP21213    | <i>Kabuli</i>    | Ca_Kabuli_denovo             | 15011020                       | (G/A)       |
| 21214       | CakSNP21214    | <i>Kabuli</i>    | Ca_Kabuli_denovo             | 15012544                       | (C/A)       |
| 21215       | CakSNP21215    | <i>Kabuli</i>    | Ca_Kabuli_denovo             | 15012589                       | (C/T)       |
| 21216       | CakSNP21216    | <i>Kabuli</i>    | Ca_Kabuli_denovo             | 15019523                       | (T/C)       |
| 21217       | CakSNP21217    | <i>Kabuli</i>    | Ca_Kabuli_denovo             | 15019572                       | (G/T)       |
| 21218       | CakSNP21218    | <i>Kabuli</i>    | Ca_Kabuli_denovo             | 15029564                       | (G/A)       |
| 21219       | CakSNP21219    | <i>Kabuli</i>    | Ca_Kabuli_denovo             | 15029594                       | (G/A)       |
| 21220       | CakSNP21220    | <i>Kabuli</i>    | Ca_Kabuli_denovo             | 15029893                       | (T/G)       |
| 21221       | CakSNP21221    | <i>Kabuli</i>    | Ca_Kabuli_denovo             | 15029901                       | (T/C)       |
| 21222       | CakSNP21222    | <i>Kabuli</i>    | Ca_Kabuli_denovo             | 15033418                       | (G/A)       |
| 21223       | CakSNP21223    | <i>Kabuli</i>    | Ca_Kabuli_denovo             | 15048640                       | (G/C)       |
| 21224       | CakSNP21224    | <i>Kabuli</i>    | Ca_Kabuli_denovo             | 15053938                       | (G/C)       |
| 21225       | CakSNP21225    | <i>Kabuli</i>    | Ca_Kabuli_denovo             | 15053965                       | (T/C)       |
| 21226       | CakSNP21226    | <i>Kabuli</i>    | Ca_Kabuli_denovo             | 15055093                       | (G/C)       |
| 21227       | CakSNP21227    | <i>Kabuli</i>    | Ca_Kabuli_denovo             | 15055828                       | (C/A)       |
| 21228       | CakSNP21228    | <i>Kabuli</i>    | Ca_Kabuli_denovo             | 15056085                       | (T/C)       |
| 21229       | CakSNP21229    | <i>Kabuli</i>    | Ca_Kabuli_denovo             | 15056124                       | (C/T)       |
| 21230       | CakSNP21230    | <i>Kabuli</i>    | Ca_Kabuli_denovo             | 15057672                       | (A/G)       |
| 21231       | CakSNP21231    | <i>Kabuli</i>    | Ca_Kabuli_denovo             | 15058226                       | (C/A)       |
| 21232       | CakSNP21232    | <i>Kabuli</i>    | Ca_Kabuli_denovo             | 15061165                       | (A/C)       |
| 21233       | CakSNP21233    | <i>Kabuli</i>    | Ca_Kabuli_denovo             | 15063461                       | (C/T)       |
| 21234       | CakSNP21234    | <i>Kabuli</i>    | Ca_Kabuli_denovo             | 15064384                       | (C/T)       |
| 21235       | CakSNP21235    | <i>Kabuli</i>    | Ca_Kabuli_denovo             | 15068536                       | (G/C)       |
| 21236       | CakSNP21236    | <i>Kabuli</i>    | Ca_Kabuli_denovo             | 15072879                       | (C/T)       |
| 21237       | CakSNP21237    | <i>Kabuli</i>    | Ca_Kabuli_denovo             | 15072882                       | (A/C)       |
| 21238       | CakSNP21238    | <i>Kabuli</i>    | Ca_Kabuli_denovo             | 15076991                       | (G/C)       |
| 21239       | CakSNP21239    | <i>Kabuli</i>    | Ca_Kabuli_denovo             | 15077061                       | (T/C)       |
| 21240       | CakSNP21240    | <i>Kabuli</i>    | Ca_Kabuli_denovo             | 15078562                       | (T/C)       |
| 21241       | CakSNP21241    | <i>Kabuli</i>    | Ca_Kabuli_denovo             | 15078586                       | (G/C)       |

| <b>S.N.</b> | <b>SNP IDs</b> | <b>Cultivars</b> | <b>Chromosomes/scaffolds</b> | <b>Physical positions (bp)</b> | <b>SNPs</b> |
|-------------|----------------|------------------|------------------------------|--------------------------------|-------------|
| 21242       | CakSNP21242    | <i>Kabuli</i>    | Ca_Kabuli_denovo             | 15078864                       | (A/G)       |
| 21243       | CakSNP21243    | <i>Kabuli</i>    | Ca_Kabuli_denovo             | 15079985                       | (C/A)       |
| 21244       | CakSNP21244    | <i>Kabuli</i>    | Ca_Kabuli_denovo             | 15079994                       | (A/G)       |
| 21245       | CakSNP21245    | <i>Kabuli</i>    | Ca_Kabuli_denovo             | 15080664                       | (G/A)       |
| 21246       | CakSNP21246    | <i>Kabuli</i>    | Ca_Kabuli_denovo             | 15081288                       | (C/T)       |
| 21247       | CakSNP21247    | <i>Kabuli</i>    | Ca_Kabuli_denovo             | 15081298                       | (G/A)       |
| 21248       | CakSNP21248    | <i>Kabuli</i>    | Ca_Kabuli_denovo             | 15084526                       | (C/T)       |
| 21249       | CakSNP21249    | <i>Kabuli</i>    | Ca_Kabuli_denovo             | 15084576                       | (C/T)       |
| 21250       | CakSNP21250    | <i>Kabuli</i>    | Ca_Kabuli_denovo             | 15097373                       | (A/C)       |
| 21251       | CakSNP21251    | <i>Kabuli</i>    | Ca_Kabuli_denovo             | 15101968                       | (T/C)       |
| 21252       | CakSNP21252    | <i>Kabuli</i>    | Ca_Kabuli_denovo             | 15109364                       | (G/A)       |
| 21253       | CakSNP21253    | <i>Kabuli</i>    | Ca_Kabuli_denovo             | 15111061                       | (T/C)       |
| 21254       | CakSNP21254    | <i>Kabuli</i>    | Ca_Kabuli_denovo             | 15121640                       | (T/C)       |
| 21255       | CakSNP21255    | <i>Kabuli</i>    | Ca_Kabuli_denovo             | 15122674                       | (A/C)       |
| 21256       | CakSNP21256    | <i>Kabuli</i>    | Ca_Kabuli_denovo             | 15125029                       | (A/C)       |
| 21257       | CakSNP21257    | <i>Kabuli</i>    | Ca_Kabuli_denovo             | 15125256                       | (A/G)       |
| 21258       | CakSNP21258    | <i>Kabuli</i>    | Ca_Kabuli_denovo             | 15128950                       | (C/G)       |
| 21259       | CakSNP21259    | <i>Kabuli</i>    | Ca_Kabuli_denovo             | 15136143                       | (G/A)       |
| 21260       | CakSNP21260    | <i>Kabuli</i>    | Ca_Kabuli_denovo             | 15146085                       | (T/C)       |
| 21261       | CakSNP21261    | <i>Kabuli</i>    | Ca_Kabuli_denovo             | 15146116                       | (C/G)       |
| 21262       | CakSNP21262    | <i>Kabuli</i>    | Ca_Kabuli_denovo             | 15147215                       | (G/C)       |
| 21263       | CakSNP21263    | <i>Kabuli</i>    | Ca_Kabuli_denovo             | 15148861                       | (A/C)       |
| 21264       | CakSNP21264    | <i>Kabuli</i>    | Ca_Kabuli_denovo             | 15148863                       | (A/C)       |
| 21265       | CakSNP21265    | <i>Kabuli</i>    | Ca_Kabuli_denovo             | 15149093                       | (G/T)       |
| 21266       | CakSNP21266    | <i>Kabuli</i>    | Ca_Kabuli_denovo             | 15149102                       | (C/T)       |
| 21267       | CakSNP21267    | <i>Kabuli</i>    | Ca_Kabuli_denovo             | 15162466                       | (C/G)       |
| 21268       | CakSNP21268    | <i>Kabuli</i>    | Ca_Kabuli_denovo             | 15162535                       | (C/G)       |
| 21269       | CakSNP21269    | <i>Kabuli</i>    | Ca_Kabuli_denovo             | 15172412                       | (A/G)       |
| 21270       | CakSNP21270    | <i>Kabuli</i>    | Ca_Kabuli_denovo             | 15173713                       | (G/T)       |
| 21271       | CakSNP21271    | <i>Kabuli</i>    | Ca_Kabuli_denovo             | 15173771                       | (T/G)       |
| 21272       | CakSNP21272    | <i>Kabuli</i>    | Ca_Kabuli_denovo             | 15175666                       | (T/C)       |
| 21273       | CakSNP21273    | <i>Kabuli</i>    | Ca_Kabuli_denovo             | 15178364                       | (A/C)       |
| 21274       | CakSNP21274    | <i>Kabuli</i>    | Ca_Kabuli_denovo             | 15178367                       | (C/T)       |
| 21275       | CakSNP21275    | <i>Kabuli</i>    | Ca_Kabuli_denovo             | 15181189                       | (C/G)       |
| 21276       | CakSNP21276    | <i>Kabuli</i>    | Ca_Kabuli_denovo             | 15193542                       | (A/G)       |
| 21277       | CakSNP21277    | <i>Kabuli</i>    | Ca_Kabuli_denovo             | 15193595                       | (T/G)       |
| 21278       | CakSNP21278    | <i>Kabuli</i>    | Ca_Kabuli_denovo             | 15194474                       | (A/C)       |
| 21279       | CakSNP21279    | <i>Kabuli</i>    | Ca_Kabuli_denovo             | 15194482                       | (A/G)       |

| <b>S.N.</b> | <b>SNP IDs</b> | <b>Cultivars</b> | <b>Chromosomes/scaffolds</b> | <b>Physical positions (bp)</b> | <b>SNPs</b> |
|-------------|----------------|------------------|------------------------------|--------------------------------|-------------|
| 21280       | CakSNP21280    | <i>Kabuli</i>    | Ca_Kabuli_denovo             | 15198160                       | (T/C)       |
| 21281       | CakSNP21281    | <i>Kabuli</i>    | Ca_Kabuli_denovo             | 15198174                       | (G/A)       |
| 21282       | CakSNP21282    | <i>Kabuli</i>    | Ca_Kabuli_denovo             | 15198245                       | (A/G)       |
| 21283       | CakSNP21283    | <i>Kabuli</i>    | Ca_Kabuli_denovo             | 15199468                       | (T/C)       |
| 21284       | CakSNP21284    | <i>Kabuli</i>    | Ca_Kabuli_denovo             | 15199489                       | (T/C)       |
| 21285       | CakSNP21285    | <i>Kabuli</i>    | Ca_Kabuli_denovo             | 15199495                       | (G/A)       |
| 21286       | CakSNP21286    | <i>Kabuli</i>    | Ca_Kabuli_denovo             | 15206923                       | (G/A)       |
| 21287       | CakSNP21287    | <i>Kabuli</i>    | Ca_Kabuli_denovo             | 15206935                       | (A/G)       |
| 21288       | CakSNP21288    | <i>Kabuli</i>    | Ca_Kabuli_denovo             | 15209330                       | (A/G)       |
| 21289       | CakSNP21289    | <i>Kabuli</i>    | Ca_Kabuli_denovo             | 15210193                       | (G/A)       |
| 21290       | CakSNP21290    | <i>Kabuli</i>    | Ca_Kabuli_denovo             | 15210344                       | (C/T)       |
| 21291       | CakSNP21291    | <i>Kabuli</i>    | Ca_Kabuli_denovo             | 15211610                       | (A/G)       |
| 21292       | CakSNP21292    | <i>Kabuli</i>    | Ca_Kabuli_denovo             | 15212128                       | (T/C)       |
| 21293       | CakSNP21293    | <i>Kabuli</i>    | Ca_Kabuli_denovo             | 15212149                       | (T/C)       |
| 21294       | CakSNP21294    | <i>Kabuli</i>    | Ca_Kabuli_denovo             | 15212161                       | (G/C)       |
| 21295       | CakSNP21295    | <i>Kabuli</i>    | Ca_Kabuli_denovo             | 15213006                       | (A/T)       |
| 21296       | CakSNP21296    | <i>Kabuli</i>    | Ca_Kabuli_denovo             | 15226225                       | (G/A)       |
| 21297       | CakSNP21297    | <i>Kabuli</i>    | Ca_Kabuli_denovo             | 15228338                       | (A/C)       |
| 21298       | CakSNP21298    | <i>Kabuli</i>    | Ca_Kabuli_denovo             | 15233099                       | (A/G)       |
| 21299       | CakSNP21299    | <i>Kabuli</i>    | Ca_Kabuli_denovo             | 15237165                       | (T/C)       |
| 21300       | CakSNP21300    | <i>Kabuli</i>    | Ca_Kabuli_denovo             | 15238403                       | (C/G)       |
| 21301       | CakSNP21301    | <i>Kabuli</i>    | Ca_Kabuli_denovo             | 15244019                       | (C/T)       |
| 21302       | CakSNP21302    | <i>Kabuli</i>    | Ca_Kabuli_denovo             | 15245249                       | (G/C)       |
| 21303       | CakSNP21303    | <i>Kabuli</i>    | Ca_Kabuli_denovo             | 15250791                       | (A/C)       |
| 21304       | CakSNP21304    | <i>Kabuli</i>    | Ca_Kabuli_denovo             | 15261871                       | (A/G)       |
| 21305       | CakSNP21305    | <i>Kabuli</i>    | Ca_Kabuli_denovo             | 15262432                       | (T/C)       |
| 21306       | CakSNP21306    | <i>Kabuli</i>    | Ca_Kabuli_denovo             | 15262463                       | (T/C)       |
| 21307       | CakSNP21307    | <i>Kabuli</i>    | Ca_Kabuli_denovo             | 15267483                       | (C/T)       |
| 21308       | CakSNP21308    | <i>Kabuli</i>    | Ca_Kabuli_denovo             | 15267510                       | (T/C)       |
| 21309       | CakSNP21309    | <i>Kabuli</i>    | Ca_Kabuli_denovo             | 15270517                       | (A/G)       |
| 21310       | CakSNP21310    | <i>Kabuli</i>    | Ca_Kabuli_denovo             | 15270541                       | (G/C)       |
| 21311       | CakSNP21311    | <i>Kabuli</i>    | Ca_Kabuli_denovo             | 15271966                       | (G/T)       |
| 21312       | CakSNP21312    | <i>Kabuli</i>    | Ca_Kabuli_denovo             | 15277962                       | (C/A)       |
| 21313       | CakSNP21313    | <i>Kabuli</i>    | Ca_Kabuli_denovo             | 15278013                       | (A/C)       |
| 21314       | CakSNP21314    | <i>Kabuli</i>    | Ca_Kabuli_denovo             | 15278377                       | (C/G)       |
| 21315       | CakSNP21315    | <i>Kabuli</i>    | Ca_Kabuli_denovo             | 15278389                       | (T/C)       |
| 21316       | CakSNP21316    | <i>Kabuli</i>    | Ca_Kabuli_denovo             | 15281124                       | (A/C)       |
| 21317       | CakSNP21317    | <i>Kabuli</i>    | Ca_Kabuli_denovo             | 15281657                       | (C/A)       |

| <b>S.N.</b> | <b>SNP IDs</b> | <b>Cultivars</b> | <b>Chromosomes/scaffolds</b> | <b>Physical positions (bp)</b> | <b>SNPs</b> |
|-------------|----------------|------------------|------------------------------|--------------------------------|-------------|
| 21318       | CakSNP21318    | <i>Kabuli</i>    | Ca_Kabuli_denovo             | 15281660                       | (C/G)       |
| 21319       | CakSNP21319    | <i>Kabuli</i>    | Ca_Kabuli_denovo             | 15285712                       | (T/A)       |
| 21320       | CakSNP21320    | <i>Kabuli</i>    | Ca_Kabuli_denovo             | 15286336                       | (C/T)       |
| 21321       | CakSNP21321    | <i>Kabuli</i>    | Ca_Kabuli_denovo             | 15289465                       | (C/T)       |
| 21322       | CakSNP21322    | <i>Kabuli</i>    | Ca_Kabuli_denovo             | 15289612                       | (A/G)       |
| 21323       | CakSNP21323    | <i>Kabuli</i>    | Ca_Kabuli_denovo             | 15298450                       | (G/T)       |
| 21324       | CakSNP21324    | <i>Kabuli</i>    | Ca_Kabuli_denovo             | 15298471                       | (T/A)       |
| 21325       | CakSNP21325    | <i>Kabuli</i>    | Ca_Kabuli_denovo             | 15301323                       | (C/T)       |
| 21326       | CakSNP21326    | <i>Kabuli</i>    | Ca_Kabuli_denovo             | 15301328                       | (C/T)       |
| 21327       | CakSNP21327    | <i>Kabuli</i>    | Ca_Kabuli_denovo             | 15307943                       | (G/C)       |
| 21328       | CakSNP21328    | <i>Kabuli</i>    | Ca_Kabuli_denovo             | 15308754                       | (C/G)       |
| 21329       | CakSNP21329    | <i>Kabuli</i>    | Ca_Kabuli_denovo             | 15310682                       | (A/C)       |
| 21330       | CakSNP21330    | <i>Kabuli</i>    | Ca_Kabuli_denovo             | 15310711                       | (T/C)       |
| 21331       | CakSNP21331    | <i>Kabuli</i>    | Ca_Kabuli_denovo             | 15310717                       | (G/A)       |
| 21332       | CakSNP21332    | <i>Kabuli</i>    | Ca_Kabuli_denovo             | 15311372                       | (A/T)       |
| 21333       | CakSNP21333    | <i>Kabuli</i>    | Ca_Kabuli_denovo             | 15321205                       | (G/A)       |
| 21334       | CakSNP21334    | <i>Kabuli</i>    | Ca_Kabuli_denovo             | 15325303                       | (C/G)       |
| 21335       | CakSNP21335    | <i>Kabuli</i>    | Ca_Kabuli_denovo             | 15325309                       | (A/C)       |
| 21336       | CakSNP21336    | <i>Kabuli</i>    | Ca_Kabuli_denovo             | 15328163                       | (G/C)       |
| 21337       | CakSNP21337    | <i>Kabuli</i>    | Ca_Kabuli_denovo             | 15339934                       | (C/T)       |
| 21338       | CakSNP21338    | <i>Kabuli</i>    | Ca_Kabuli_denovo             | 15341482                       | (A/G)       |
| 21339       | CakSNP21339    | <i>Kabuli</i>    | Ca_Kabuli_denovo             | 15342107                       | (G/A)       |
| 21340       | CakSNP21340    | <i>Kabuli</i>    | Ca_Kabuli_denovo             | 15343248                       | (C/G)       |
| 21341       | CakSNP21341    | <i>Kabuli</i>    | Ca_Kabuli_denovo             | 15343266                       | (A/G)       |
| 21342       | CakSNP21342    | <i>Kabuli</i>    | Ca_Kabuli_denovo             | 15345196                       | (T/C)       |
| 21343       | CakSNP21343    | <i>Kabuli</i>    | Ca_Kabuli_denovo             | 15345239                       | (T/A)       |
| 21344       | CakSNP21344    | <i>Kabuli</i>    | Ca_Kabuli_denovo             | 15349210                       | (C/T)       |
| 21345       | CakSNP21345    | <i>Kabuli</i>    | Ca_Kabuli_denovo             | 15349219                       | (C/T)       |
| 21346       | CakSNP21346    | <i>Kabuli</i>    | Ca_Kabuli_denovo             | 15350042                       | (C/T)       |
| 21347       | CakSNP21347    | <i>Kabuli</i>    | Ca_Kabuli_denovo             | 15350057                       | (C/G)       |
| 21348       | CakSNP21348    | <i>Kabuli</i>    | Ca_Kabuli_denovo             | 15352453                       | (G/A)       |
| 21349       | CakSNP21349    | <i>Kabuli</i>    | Ca_Kabuli_denovo             | 15352531                       | (A/G)       |
| 21350       | CakSNP21350    | <i>Kabuli</i>    | Ca_Kabuli_denovo             | 15357660                       | (G/C)       |
| 21351       | CakSNP21351    | <i>Kabuli</i>    | Ca_Kabuli_denovo             | 15357668                       | (C/T)       |
| 21352       | CakSNP21352    | <i>Kabuli</i>    | Ca_Kabuli_denovo             | 15358078                       | (C/T)       |
| 21353       | CakSNP21353    | <i>Kabuli</i>    | Ca_Kabuli_denovo             | 15358348                       | (C/T)       |
| 21354       | CakSNP21354    | <i>Kabuli</i>    | Ca_Kabuli_denovo             | 15361024                       | (C/T)       |
| 21355       | CakSNP21355    | <i>Kabuli</i>    | Ca_Kabuli_denovo             | 15361027                       | (A/G)       |

| <b>S.N.</b> | <b>SNP IDs</b> | <b>Cultivars</b> | <b>Chromosomes/scaffolds</b> | <b>Physical positions (bp)</b> | <b>SNPs</b> |
|-------------|----------------|------------------|------------------------------|--------------------------------|-------------|
| 21356       | CakSNP21356    | <i>Kabuli</i>    | Ca_Kabuli_denovo             | 15361033                       | (A/C)       |
| 21357       | CakSNP21357    | <i>Kabuli</i>    | Ca_Kabuli_denovo             | 15363103                       | (C/T)       |
| 21358       | CakSNP21358    | <i>Kabuli</i>    | Ca_Kabuli_denovo             | 15363133                       | (A/G)       |
| 21359       | CakSNP21359    | <i>Kabuli</i>    | Ca_Kabuli_denovo             | 15366397                       | (G/A)       |
| 21360       | CakSNP21360    | <i>Kabuli</i>    | Ca_Kabuli_denovo             | 15368258                       | (T/C)       |
| 21361       | CakSNP21361    | <i>Kabuli</i>    | Ca_Kabuli_denovo             | 15368306                       | (A/G)       |
| 21362       | CakSNP21362    | <i>Kabuli</i>    | Ca_Kabuli_denovo             | 15379238                       | (T/C)       |
| 21363       | CakSNP21363    | <i>Kabuli</i>    | Ca_Kabuli_denovo             | 15379241                       | (G/A)       |
| 21364       | CakSNP21364    | <i>Kabuli</i>    | Ca_Kabuli_denovo             | 15383419                       | (T/C)       |
| 21365       | CakSNP21365    | <i>Kabuli</i>    | Ca_Kabuli_denovo             | 15386024                       | (G/A)       |
| 21366       | CakSNP21366    | <i>Kabuli</i>    | Ca_Kabuli_denovo             | 15386083                       | (C/A)       |
| 21367       | CakSNP21367    | <i>Kabuli</i>    | Ca_Kabuli_denovo             | 15387519                       | (C/T)       |
| 21368       | CakSNP21368    | <i>Kabuli</i>    | Ca_Kabuli_denovo             | 15390193                       | (T/G)       |
| 21369       | CakSNP21369    | <i>Kabuli</i>    | Ca_Kabuli_denovo             | 15390614                       | (G/C)       |
| 21370       | CakSNP21370    | <i>Kabuli</i>    | Ca_Kabuli_denovo             | 15390631                       | (G/C)       |
| 21371       | CakSNP21371    | <i>Kabuli</i>    | Ca_Kabuli_denovo             | 15390776                       | (C/G)       |
| 21372       | CakSNP21372    | <i>Kabuli</i>    | Ca_Kabuli_denovo             | 15390791                       | (G/A)       |
| 21373       | CakSNP21373    | <i>Kabuli</i>    | Ca_Kabuli_denovo             | 15391286                       | (G/A)       |
| 21374       | CakSNP21374    | <i>Kabuli</i>    | Ca_Kabuli_denovo             | 15391314                       | (A/C)       |
| 21375       | CakSNP21375    | <i>Kabuli</i>    | Ca_Kabuli_denovo             | 15397292                       | (G/C)       |
| 21376       | CakSNP21376    | <i>Kabuli</i>    | Ca_Kabuli_denovo             | 15397334                       | (C/G)       |
| 21377       | CakSNP21377    | <i>Kabuli</i>    | Ca_Kabuli_denovo             | 15400127                       | (G/A)       |
| 21378       | CakSNP21378    | <i>Kabuli</i>    | Ca_Kabuli_denovo             | 15400133                       | (A/C)       |
| 21379       | CakSNP21379    | <i>Kabuli</i>    | Ca_Kabuli_denovo             | 15401000                       | (A/G)       |
| 21380       | CakSNP21380    | <i>Kabuli</i>    | Ca_Kabuli_denovo             | 15401033                       | (G/T)       |
| 21381       | CakSNP21381    | <i>Kabuli</i>    | Ca_Kabuli_denovo             | 15406282                       | (A/C)       |
| 21382       | CakSNP21382    | <i>Kabuli</i>    | Ca_Kabuli_denovo             | 15406287                       | (G/C)       |
| 21383       | CakSNP21383    | <i>Kabuli</i>    | Ca_Kabuli_denovo             | 15406288                       | (G/T)       |
| 21384       | CakSNP21384    | <i>Kabuli</i>    | Ca_Kabuli_denovo             | 15407414                       | (T/G)       |
| 21385       | CakSNP21385    | <i>Kabuli</i>    | Ca_Kabuli_denovo             | 15407444                       | (A/G)       |
| 21386       | CakSNP21386    | <i>Kabuli</i>    | Ca_Kabuli_denovo             | 15414998                       | (A/G)       |
| 21387       | CakSNP21387    | <i>Kabuli</i>    | Ca_Kabuli_denovo             | 15417467                       | (A/G)       |
| 21388       | CakSNP21388    | <i>Kabuli</i>    | Ca_Kabuli_denovo             | 15424718                       | (C/G)       |
| 21389       | CakSNP21389    | <i>Kabuli</i>    | Ca_Kabuli_denovo             | 15425714                       | (A/G)       |
| 21390       | CakSNP21390    | <i>Kabuli</i>    | Ca_Kabuli_denovo             | 15426125                       | (A/G)       |
| 21391       | CakSNP21391    | <i>Kabuli</i>    | Ca_Kabuli_denovo             | 15428336                       | (G/C)       |
| 21392       | CakSNP21392    | <i>Kabuli</i>    | Ca_Kabuli_denovo             | 15430885                       | (T/G)       |
| 21393       | CakSNP21393    | <i>Kabuli</i>    | Ca_Kabuli_denovo             | 15431873                       | (G/C)       |

| <b>S.N.</b> | <b>SNP IDs</b> | <b>Cultivars</b> | <b>Chromosomes/scaffolds</b> | <b>Physical positions (bp)</b> | <b>SNPs</b> |
|-------------|----------------|------------------|------------------------------|--------------------------------|-------------|
| 21394       | CakSNP21394    | <i>Kabuli</i>    | Ca_Kabuli_denovo             | 15431888                       | (C/T)       |
| 21395       | CakSNP21395    | <i>Kabuli</i>    | Ca_Kabuli_denovo             | 15431906                       | (C/G)       |
| 21396       | CakSNP21396    | <i>Kabuli</i>    | Ca_Kabuli_denovo             | 15431918                       | (C/T)       |
| 21397       | CakSNP21397    | <i>Kabuli</i>    | Ca_Kabuli_denovo             | 15440132                       | (A/C)       |
| 21398       | CakSNP21398    | <i>Kabuli</i>    | Ca_Kabuli_denovo             | 15441290                       | (A/C)       |
| 21399       | CakSNP21399    | <i>Kabuli</i>    | Ca_Kabuli_denovo             | 15441305                       | (A/G)       |
| 21400       | CakSNP21400    | <i>Kabuli</i>    | Ca_Kabuli_denovo             | 15455235                       | (G/T)       |
| 21401       | CakSNP21401    | <i>Kabuli</i>    | Ca_Kabuli_denovo             | 15455296                       | (C/G)       |
| 21402       | CakSNP21402    | <i>Kabuli</i>    | Ca_Kabuli_denovo             | 15456996                       | (G/A)       |
| 21403       | CakSNP21403    | <i>Kabuli</i>    | Ca_Kabuli_denovo             | 15458395                       | (C/T)       |
| 21404       | CakSNP21404    | <i>Kabuli</i>    | Ca_Kabuli_denovo             | 15458942                       | (G/A)       |
| 21405       | CakSNP21405    | <i>Kabuli</i>    | Ca_Kabuli_denovo             | 15460422                       | (A/G)       |
| 21406       | CakSNP21406    | <i>Kabuli</i>    | Ca_Kabuli_denovo             | 15460460                       | (G/A)       |
| 21407       | CakSNP21407    | <i>Kabuli</i>    | Ca_Kabuli_denovo             | 15464054                       | (C/T)       |
| 21408       | CakSNP21408    | <i>Kabuli</i>    | Ca_Kabuli_denovo             | 15464063                       | (A/G)       |
| 21409       | CakSNP21409    | <i>Kabuli</i>    | Ca_Kabuli_denovo             | 15464257                       | (C/T)       |
| 21410       | CakSNP21410    | <i>Kabuli</i>    | Ca_Kabuli_denovo             | 15464599                       | (A/G)       |
| 21411       | CakSNP21411    | <i>Kabuli</i>    | Ca_Kabuli_denovo             | 15468646                       | (C/T)       |
| 21412       | CakSNP21412    | <i>Kabuli</i>    | Ca_Kabuli_denovo             | 15469155                       | (C/T)       |
| 21413       | CakSNP21413    | <i>Kabuli</i>    | Ca_Kabuli_denovo             | 15474029                       | (A/G)       |
| 21414       | CakSNP21414    | <i>Kabuli</i>    | Ca_Kabuli_denovo             | 15474040                       | (T/G)       |
| 21415       | CakSNP21415    | <i>Kabuli</i>    | Ca_Kabuli_denovo             | 15474052                       | (C/A)       |
| 21416       | CakSNP21416    | <i>Kabuli</i>    | Ca_Kabuli_denovo             | 15474082                       | (G/T)       |
| 21417       | CakSNP21417    | <i>Kabuli</i>    | Ca_Kabuli_denovo             | 15475209                       | (C/G)       |
| 21418       | CakSNP21418    | <i>Kabuli</i>    | Ca_Kabuli_denovo             | 15475225                       | (T/C)       |
| 21419       | CakSNP21419    | <i>Kabuli</i>    | Ca_Kabuli_denovo             | 15478410                       | (T/G)       |
| 21420       | CakSNP21420    | <i>Kabuli</i>    | Ca_Kabuli_denovo             | 15480813                       | (C/T)       |
| 21421       | CakSNP21421    | <i>Kabuli</i>    | Ca_Kabuli_denovo             | 15480822                       | (C/T)       |
| 21422       | CakSNP21422    | <i>Kabuli</i>    | Ca_Kabuli_denovo             | 15491990                       | (T/C)       |
| 21423       | CakSNP21423    | <i>Kabuli</i>    | Ca_Kabuli_denovo             | 15491996                       | (G/A)       |
| 21424       | CakSNP21424    | <i>Kabuli</i>    | Ca_Kabuli_denovo             | 15499304                       | (G/T)       |
| 21425       | CakSNP21425    | <i>Kabuli</i>    | Ca_Kabuli_denovo             | 15499316                       | (T/C)       |
| 21426       | CakSNP21426    | <i>Kabuli</i>    | Ca_Kabuli_denovo             | 15499338                       | (T/G)       |
| 21427       | CakSNP21427    | <i>Kabuli</i>    | Ca_Kabuli_denovo             | 15506868                       | (C/T)       |
| 21428       | CakSNP21428    | <i>Kabuli</i>    | Ca_Kabuli_denovo             | 15507953                       | (G/T)       |
| 21429       | CakSNP21429    | <i>Kabuli</i>    | Ca_Kabuli_denovo             | 15507965                       | (A/G)       |
| 21430       | CakSNP21430    | <i>Kabuli</i>    | Ca_Kabuli_denovo             | 15521689                       | (T/C)       |
| 21431       | CakSNP21431    | <i>Kabuli</i>    | Ca_Kabuli_denovo             | 15522761                       | (G/A)       |

| <b>S.N.</b> | <b>SNP IDs</b> | <b>Cultivars</b> | <b>Chromosomes/scaffolds</b> | <b>Physical positions (bp)</b> | <b>SNPs</b> |
|-------------|----------------|------------------|------------------------------|--------------------------------|-------------|
| 21432       | CakSNP21432    | <i>Kabuli</i>    | Ca_Kabuli_denovo             | 15522773                       | (G/A)       |
| 21433       | CakSNP21433    | <i>Kabuli</i>    | Ca_Kabuli_denovo             | 15524716                       | (G/T)       |
| 21434       | CakSNP21434    | <i>Kabuli</i>    | Ca_Kabuli_denovo             | 15524717                       | (T/C)       |
| 21435       | CakSNP21435    | <i>Kabuli</i>    | Ca_Kabuli_denovo             | 15524990                       | (T/C)       |
| 21436       | CakSNP21436    | <i>Kabuli</i>    | Ca_Kabuli_denovo             | 15526190                       | (A/G)       |
| 21437       | CakSNP21437    | <i>Kabuli</i>    | Ca_Kabuli_denovo             | 15530285                       | (T/G)       |
| 21438       | CakSNP21438    | <i>Kabuli</i>    | Ca_Kabuli_denovo             | 15531595                       | (T/C)       |
| 21439       | CakSNP21439    | <i>Kabuli</i>    | Ca_Kabuli_denovo             | 15552032                       | (A/G)       |
| 21440       | CakSNP21440    | <i>Kabuli</i>    | Ca_Kabuli_denovo             | 15564979                       | (C/T)       |
| 21441       | CakSNP21441    | <i>Kabuli</i>    | Ca_Kabuli_denovo             | 15566724                       | (T/A)       |
| 21442       | CakSNP21442    | <i>Kabuli</i>    | Ca_Kabuli_denovo             | 15568183                       | (T/C)       |
| 21443       | CakSNP21443    | <i>Kabuli</i>    | Ca_Kabuli_denovo             | 15568192                       | (G/T)       |
| 21444       | CakSNP21444    | <i>Kabuli</i>    | Ca_Kabuli_denovo             | 15575379                       | (A/G)       |
| 21445       | CakSNP21445    | <i>Kabuli</i>    | Ca_Kabuli_denovo             | 15575382                       | (G/C)       |
| 21446       | CakSNP21446    | <i>Kabuli</i>    | Ca_Kabuli_denovo             | 15576520                       | (G/C)       |
| 21447       | CakSNP21447    | <i>Kabuli</i>    | Ca_Kabuli_denovo             | 15582787                       | (T/C)       |
| 21448       | CakSNP21448    | <i>Kabuli</i>    | Ca_Kabuli_denovo             | 15582800                       | (C/G)       |
| 21449       | CakSNP21449    | <i>Kabuli</i>    | Ca_Kabuli_denovo             | 15590817                       | (A/G)       |
| 21450       | CakSNP21450    | <i>Kabuli</i>    | Ca_Kabuli_denovo             | 15591832                       | (T/C)       |
| 21451       | CakSNP21451    | <i>Kabuli</i>    | Ca_Kabuli_denovo             | 15595473                       | (C/A)       |
| 21452       | CakSNP21452    | <i>Kabuli</i>    | Ca_Kabuli_denovo             | 15597791                       | (G/A)       |
| 21453       | CakSNP21453    | <i>Kabuli</i>    | Ca_Kabuli_denovo             | 15597799                       | (C/A)       |
| 21454       | CakSNP21454    | <i>Kabuli</i>    | Ca_Kabuli_denovo             | 15603179                       | (A/G)       |
| 21455       | CakSNP21455    | <i>Kabuli</i>    | Ca_Kabuli_denovo             | 15603193                       | (T/C)       |
| 21456       | CakSNP21456    | <i>Kabuli</i>    | Ca_Kabuli_denovo             | 15606500                       | (G/A)       |
| 21457       | CakSNP21457    | <i>Kabuli</i>    | Ca_Kabuli_denovo             | 15609823                       | (G/A)       |
| 21458       | CakSNP21458    | <i>Kabuli</i>    | Ca_Kabuli_denovo             | 15611115                       | (G/C)       |
| 21459       | CakSNP21459    | <i>Kabuli</i>    | Ca_Kabuli_denovo             | 15611121                       | (C/T)       |
| 21460       | CakSNP21460    | <i>Kabuli</i>    | Ca_Kabuli_denovo             | 15620902                       | (C/T)       |
| 21461       | CakSNP21461    | <i>Kabuli</i>    | Ca_Kabuli_denovo             | 15620920                       | (G/T)       |
| 21462       | CakSNP21462    | <i>Kabuli</i>    | Ca_Kabuli_denovo             | 15620944                       | (C/G)       |
| 21463       | CakSNP21463    | <i>Kabuli</i>    | Ca_Kabuli_denovo             | 15621127                       | (G/A)       |
| 21464       | CakSNP21464    | <i>Kabuli</i>    | Ca_Kabuli_denovo             | 15628387                       | (T/C)       |
| 21465       | CakSNP21465    | <i>Kabuli</i>    | Ca_Kabuli_denovo             | 15631264                       | (G/T)       |
| 21466       | CakSNP21466    | <i>Kabuli</i>    | Ca_Kabuli_denovo             | 15631270                       | (A/G)       |
| 21467       | CakSNP21467    | <i>Kabuli</i>    | Ca_Kabuli_denovo             | 15631562                       | (C/A)       |
| 21468       | CakSNP21468    | <i>Kabuli</i>    | Ca_Kabuli_denovo             | 15633158                       | (C/A)       |
| 21469       | CakSNP21469    | <i>Kabuli</i>    | Ca_Kabuli_denovo             | 15637429                       | (G/T)       |

| <b>S.N.</b> | <b>SNP IDs</b> | <b>Cultivars</b> | <b>Chromosomes/scaffolds</b> | <b>Physical positions (bp)</b> | <b>SNPs</b> |
|-------------|----------------|------------------|------------------------------|--------------------------------|-------------|
| 21470       | CakSNP21470    | <i>Kabuli</i>    | Ca_Kabuli_denovo             | 15638521                       | (C/G)       |
| 21471       | CakSNP21471    | <i>Kabuli</i>    | Ca_Kabuli_denovo             | 15638548                       | (A/G)       |
| 21472       | CakSNP21472    | <i>Kabuli</i>    | Ca_Kabuli_denovo             | 15640495                       | (C/T)       |
| 21473       | CakSNP21473    | <i>Kabuli</i>    | Ca_Kabuli_denovo             | 15643259                       | (G/A)       |
| 21474       | CakSNP21474    | <i>Kabuli</i>    | Ca_Kabuli_denovo             | 15643271                       | (T/C)       |
| 21475       | CakSNP21475    | <i>Kabuli</i>    | Ca_Kabuli_denovo             | 15643735                       | (C/T)       |
| 21476       | CakSNP21476    | <i>Kabuli</i>    | Ca_Kabuli_denovo             | 15643743                       | (A/G)       |
| 21477       | CakSNP21477    | <i>Kabuli</i>    | Ca_Kabuli_denovo             | 15643912                       | (T/C)       |
| 21478       | CakSNP21478    | <i>Kabuli</i>    | Ca_Kabuli_denovo             | 15643960                       | (C/T)       |
| 21479       | CakSNP21479    | <i>Kabuli</i>    | Ca_Kabuli_denovo             | 15644967                       | (A/C)       |
| 21480       | CakSNP21480    | <i>Kabuli</i>    | Ca_Kabuli_denovo             | 15647635                       | (A/G)       |
| 21481       | CakSNP21481    | <i>Kabuli</i>    | Ca_Kabuli_denovo             | 15650816                       | (G/A)       |
| 21482       | CakSNP21482    | <i>Kabuli</i>    | Ca_Kabuli_denovo             | 15656144                       | (T/C)       |
| 21483       | CakSNP21483    | <i>Kabuli</i>    | Ca_Kabuli_denovo             | 15662922                       | (A/G)       |
| 21484       | CakSNP21484    | <i>Kabuli</i>    | Ca_Kabuli_denovo             | 15662923                       | (A/G)       |
| 21485       | CakSNP21485    | <i>Kabuli</i>    | Ca_Kabuli_denovo             | 15668904                       | (C/G)       |
| 21486       | CakSNP21486    | <i>Kabuli</i>    | Ca_Kabuli_denovo             | 15672757                       | (G/A)       |
| 21487       | CakSNP21487    | <i>Kabuli</i>    | Ca_Kabuli_denovo             | 15672819                       | (C/A)       |
| 21488       | CakSNP21488    | <i>Kabuli</i>    | Ca_Kabuli_denovo             | 15676871                       | (A/G)       |
| 21489       | CakSNP21489    | <i>Kabuli</i>    | Ca_Kabuli_denovo             | 15679048                       | (C/T)       |
| 21490       | CakSNP21490    | <i>Kabuli</i>    | Ca_Kabuli_denovo             | 15682338                       | (A/G)       |
| 21491       | CakSNP21491    | <i>Kabuli</i>    | Ca_Kabuli_denovo             | 15686389                       | (G/A)       |
| 21492       | CakSNP21492    | <i>Kabuli</i>    | Ca_Kabuli_denovo             | 15689140                       | (T/G)       |
| 21493       | CakSNP21493    | <i>Kabuli</i>    | Ca_Kabuli_denovo             | 15689179                       | (A/G)       |
| 21494       | CakSNP21494    | <i>Kabuli</i>    | Ca_Kabuli_denovo             | 15693017                       | (A/G)       |
| 21495       | CakSNP21495    | <i>Kabuli</i>    | Ca_Kabuli_denovo             | 15693033                       | (A/C)       |
| 21496       | CakSNP21496    | <i>Kabuli</i>    | Ca_Kabuli_denovo             | 15696764                       | (T/G)       |
| 21497       | CakSNP21497    | <i>Kabuli</i>    | Ca_Kabuli_denovo             | 15710031                       | (A/C)       |
| 21498       | CakSNP21498    | <i>Kabuli</i>    | Ca_Kabuli_denovo             | 15724677                       | (T/C)       |
| 21499       | CakSNP21499    | <i>Kabuli</i>    | Ca_Kabuli_denovo             | 15729201                       | (C/T)       |
| 21500       | CakSNP21500    | <i>Kabuli</i>    | Ca_Kabuli_denovo             | 15730162                       | (T/C)       |
| 21501       | CakSNP21501    | <i>Kabuli</i>    | Ca_Kabuli_denovo             | 15731996                       | (T/C)       |
| 21502       | CakSNP21502    | <i>Kabuli</i>    | Ca_Kabuli_denovo             | 15732030                       | (C/T)       |
| 21503       | CakSNP21503    | <i>Kabuli</i>    | Ca_Kabuli_denovo             | 15737951                       | (G/C)       |
| 21504       | CakSNP21504    | <i>Kabuli</i>    | Ca_Kabuli_denovo             | 15738002                       | (A/G)       |
| 21505       | CakSNP21505    | <i>Kabuli</i>    | Ca_Kabuli_denovo             | 15738908                       | (T/C)       |
| 21506       | CakSNP21506    | <i>Kabuli</i>    | Ca_Kabuli_denovo             | 15738922                       | (T/C)       |
| 21507       | CakSNP21507    | <i>Kabuli</i>    | Ca_Kabuli_denovo             | 15742863                       | (C/T)       |



| <b>S.N.</b> | <b>SNP IDs</b> | <b>Cultivars</b> | <b>Chromosomes/scaffolds</b> | <b>Physical positions (bp)</b> | <b>SNPs</b> |
|-------------|----------------|------------------|------------------------------|--------------------------------|-------------|
| 21508       | CakSNP21508    | <i>Kabuli</i>    | Ca_Kabuli_denovo             | 15746595                       | (T/G)       |
| 21509       | CakSNP21509    | <i>Kabuli</i>    | Ca_Kabuli_denovo             | 15746721                       | (A/G)       |
| 21510       | CakSNP21510    | <i>Kabuli</i>    | Ca_Kabuli_denovo             | 15748786                       | (T/C)       |
| 21511       | CakSNP21511    | <i>Kabuli</i>    | Ca_Kabuli_denovo             | 15750852                       | (A/C)       |
| 21512       | CakSNP21512    | <i>Kabuli</i>    | Ca_Kabuli_denovo             | 15750903                       | (T/A)       |
| 21513       | CakSNP21513    | <i>Kabuli</i>    | Ca_Kabuli_denovo             | 15750933                       | (C/T)       |
| 21514       | CakSNP21514    | <i>Kabuli</i>    | Ca_Kabuli_denovo             | 15756831                       | (C/A)       |
| 21515       | CakSNP21515    | <i>Kabuli</i>    | Ca_Kabuli_denovo             | 15760646                       | (C/G)       |
| 21516       | CakSNP21516    | <i>Kabuli</i>    | Ca_Kabuli_denovo             | 15760923                       | (A/C)       |
| 21517       | CakSNP21517    | <i>Kabuli</i>    | Ca_Kabuli_denovo             | 15766715                       | (C/T)       |
| 21518       | CakSNP21518    | <i>Kabuli</i>    | Ca_Kabuli_denovo             | 15766718                       | (G/T)       |
| 21519       | CakSNP21519    | <i>Kabuli</i>    | Ca_Kabuli_denovo             | 15769597                       | (C/T)       |
| 21520       | CakSNP21520    | <i>Kabuli</i>    | Ca_Kabuli_denovo             | 15775001                       | (G/A)       |
| 21521       | CakSNP21521    | <i>Kabuli</i>    | Ca_Kabuli_denovo             | 15777288                       | (T/G)       |
| 21522       | CakSNP21522    | <i>Kabuli</i>    | Ca_Kabuli_denovo             | 15779882                       | (G/C)       |
| 21523       | CakSNP21523    | <i>Kabuli</i>    | Ca_Kabuli_denovo             | 15780781                       | (C/T)       |
| 21524       | CakSNP21524    | <i>Kabuli</i>    | Ca_Kabuli_denovo             | 15781142                       | (G/A)       |
| 21525       | CakSNP21525    | <i>Kabuli</i>    | Ca_Kabuli_denovo             | 15781160                       | (G/A)       |
| 21526       | CakSNP21526    | <i>Kabuli</i>    | Ca_Kabuli_denovo             | 15791427                       | (C/A)       |
| 21527       | CakSNP21527    | <i>Kabuli</i>    | Ca_Kabuli_denovo             | 15791472                       | (C/G)       |
| 21528       | CakSNP21528    | <i>Kabuli</i>    | Ca_Kabuli_denovo             | 15792255                       | (C/T)       |
| 21529       | CakSNP21529    | <i>Kabuli</i>    | Ca_Kabuli_denovo             | 15806405                       | (G/A)       |
| 21530       | CakSNP21530    | <i>Kabuli</i>    | Ca_Kabuli_denovo             | 15816444                       | (G/C)       |
| 21531       | CakSNP21531    | <i>Kabuli</i>    | Ca_Kabuli_denovo             | 15816474                       | (A/C)       |
| 21532       | CakSNP21532    | <i>Kabuli</i>    | Ca_Kabuli_denovo             | 15817830                       | (A/G)       |
| 21533       | CakSNP21533    | <i>Kabuli</i>    | Ca_Kabuli_denovo             | 15820384                       | (T/C)       |
| 21534       | CakSNP21534    | <i>Kabuli</i>    | Ca_Kabuli_denovo             | 15827646                       | (G/C)       |
| 21535       | CakSNP21535    | <i>Kabuli</i>    | Ca_Kabuli_denovo             | 15835243                       | (A/T)       |
| 21536       | CakSNP21536    | <i>Kabuli</i>    | Ca_Kabuli_denovo             | 15840418                       | (C/T)       |
| 21537       | CakSNP21537    | <i>Kabuli</i>    | Ca_Kabuli_denovo             | 15843233                       | (T/A)       |
| 21538       | CakSNP21538    | <i>Kabuli</i>    | Ca_Kabuli_denovo             | 15846580                       | (C/T)       |
| 21539       | CakSNP21539    | <i>Kabuli</i>    | Ca_Kabuli_denovo             | 15846593                       | (T/C)       |
| 21540       | CakSNP21540    | <i>Kabuli</i>    | Ca_Kabuli_denovo             | 15848981                       | (A/G)       |
| 21541       | CakSNP21541    | <i>Kabuli</i>    | Ca_Kabuli_denovo             | 15848984                       | (G/C)       |
| 21542       | CakSNP21542    | <i>Kabuli</i>    | Ca_Kabuli_denovo             | 15853479                       | (G/C)       |
| 21543       | CakSNP21543    | <i>Kabuli</i>    | Ca_Kabuli_denovo             | 15855332                       | (G/T)       |
| 21544       | CakSNP21544    | <i>Kabuli</i>    | Ca_Kabuli_denovo             | 15857901                       | (A/G)       |
| 21545       | CakSNP21545    | <i>Kabuli</i>    | Ca_Kabuli_denovo             | 15858482                       | (A/G)       |

| <b>S.N.</b> | <b>SNP IDs</b> | <b>Cultivars</b> | <b>Chromosomes/scaffolds</b> | <b>Physical positions (bp)</b> | <b>SNPs</b> |
|-------------|----------------|------------------|------------------------------|--------------------------------|-------------|
| 21546       | CakSNP21546    | <i>Kabuli</i>    | Ca_Kabuli_denovo             | 15858484                       | (C/G)       |
| 21547       | CakSNP21547    | <i>Kabuli</i>    | Ca_Kabuli_denovo             | 15866668                       | (A/G)       |
| 21548       | CakSNP21548    | <i>Kabuli</i>    | Ca_Kabuli_denovo             | 15867686                       | (T/G)       |
| 21549       | CakSNP21549    | <i>Kabuli</i>    | Ca_Kabuli_denovo             | 15873998                       | (C/T)       |
| 21550       | CakSNP21550    | <i>Kabuli</i>    | Ca_Kabuli_denovo             | 15874929                       | (G/A)       |
| 21551       | CakSNP21551    | <i>Kabuli</i>    | Ca_Kabuli_denovo             | 15874948                       | (A/G)       |
| 21552       | CakSNP21552    | <i>Kabuli</i>    | Ca_Kabuli_denovo             | 15875007                       | (G/A)       |
| 21553       | CakSNP21553    | <i>Kabuli</i>    | Ca_Kabuli_denovo             | 15876783                       | (A/G)       |
| 21554       | CakSNP21554    | <i>Kabuli</i>    | Ca_Kabuli_denovo             | 15884976                       | (C/G)       |
| 21555       | CakSNP21555    | <i>Kabuli</i>    | Ca_Kabuli_denovo             | 15887807                       | (G/A)       |
| 21556       | CakSNP21556    | <i>Kabuli</i>    | Ca_Kabuli_denovo             | 15892953                       | (T/C)       |
| 21557       | CakSNP21557    | <i>Kabuli</i>    | Ca_Kabuli_denovo             | 15893254                       | (T/C)       |
| 21558       | CakSNP21558    | <i>Kabuli</i>    | Ca_Kabuli_denovo             | 15893260                       | (A/G)       |
| 21559       | CakSNP21559    | <i>Kabuli</i>    | Ca_Kabuli_denovo             | 15893327                       | (A/C)       |
| 21560       | CakSNP21560    | <i>Kabuli</i>    | Ca_Kabuli_denovo             | 15893329                       | (A/C)       |
| 21561       | CakSNP21561    | <i>Kabuli</i>    | Ca_Kabuli_denovo             | 15897534                       | (A/G)       |
| 21562       | CakSNP21562    | <i>Kabuli</i>    | Ca_Kabuli_denovo             | 15897602                       | (C/T)       |
| 21563       | CakSNP21563    | <i>Kabuli</i>    | Ca_Kabuli_denovo             | 15903773                       | (G/T)       |
| 21564       | CakSNP21564    | <i>Kabuli</i>    | Ca_Kabuli_denovo             | 15903815                       | (A/G)       |
| 21565       | CakSNP21565    | <i>Kabuli</i>    | Ca_Kabuli_denovo             | 15905649                       | (C/G)       |
| 21566       | CakSNP21566    | <i>Kabuli</i>    | Ca_Kabuli_denovo             | 15907232                       | (T/C)       |
| 21567       | CakSNP21567    | <i>Kabuli</i>    | Ca_Kabuli_denovo             | 15908094                       | (G/C)       |
| 21568       | CakSNP21568    | <i>Kabuli</i>    | Ca_Kabuli_denovo             | 15911035                       | (T/C)       |
| 21569       | CakSNP21569    | <i>Kabuli</i>    | Ca_Kabuli_denovo             | 15924073                       | (C/T)       |
| 21570       | CakSNP21570    | <i>Kabuli</i>    | Ca_Kabuli_denovo             | 15929633                       | (T/A)       |
| 21571       | CakSNP21571    | <i>Kabuli</i>    | Ca_Kabuli_denovo             | 15929674                       | (T/C)       |
| 21572       | CakSNP21572    | <i>Kabuli</i>    | Ca_Kabuli_denovo             | 15930740                       | (G/A)       |
| 21573       | CakSNP21573    | <i>Kabuli</i>    | Ca_Kabuli_denovo             | 15930808                       | (C/T)       |
| 21574       | CakSNP21574    | <i>Kabuli</i>    | Ca_Kabuli_denovo             | 15931690                       | (C/G)       |
| 21575       | CakSNP21575    | <i>Kabuli</i>    | Ca_Kabuli_denovo             | 15931714                       | (G/T)       |
| 21576       | CakSNP21576    | <i>Kabuli</i>    | Ca_Kabuli_denovo             | 15932330                       | (A/G)       |
| 21577       | CakSNP21577    | <i>Kabuli</i>    | Ca_Kabuli_denovo             | 15934836                       | (C/T)       |
| 21578       | CakSNP21578    | <i>Kabuli</i>    | Ca_Kabuli_denovo             | 15937570                       | (A/G)       |
| 21579       | CakSNP21579    | <i>Kabuli</i>    | Ca_Kabuli_denovo             | 15951873                       | (G/A)       |
| 21580       | CakSNP21580    | <i>Kabuli</i>    | Ca_Kabuli_denovo             | 15952688                       | (A/G)       |
| 21581       | CakSNP21581    | <i>Kabuli</i>    | Ca_Kabuli_denovo             | 15952703                       | (A/G)       |
| 21582       | CakSNP21582    | <i>Kabuli</i>    | Ca_Kabuli_denovo             | 15970245                       | (G/A)       |
| 21583       | CakSNP21583    | <i>Kabuli</i>    | Ca_Kabuli_denovo             | 15972570                       | (G/T)       |

| <b>S.N.</b> | <b>SNP IDs</b> | <b>Cultivars</b> | <b>Chromosomes/scaffolds</b> | <b>Physical positions (bp)</b> | <b>SNPs</b> |
|-------------|----------------|------------------|------------------------------|--------------------------------|-------------|
| 21584       | CakSNP21584    | <i>Kabuli</i>    | Ca_Kabuli_denovo             | 15972591                       | (C/G)       |
| 21585       | CakSNP21585    | <i>Kabuli</i>    | Ca_Kabuli_denovo             | 15977624                       | (G/T)       |
| 21586       | CakSNP21586    | <i>Kabuli</i>    | Ca_Kabuli_denovo             | 15980240                       | (A/T)       |
| 21587       | CakSNP21587    | <i>Kabuli</i>    | Ca_Kabuli_denovo             | 15992568                       | (C/G)       |
| 21588       | CakSNP21588    | <i>Kabuli</i>    | Ca_Kabuli_denovo             | 15996800                       | (A/C)       |
| 21589       | CakSNP21589    | <i>Kabuli</i>    | Ca_Kabuli_denovo             | 15997796                       | (A/T)       |
| 21590       | CakSNP21590    | <i>Kabuli</i>    | Ca_Kabuli_denovo             | 15997817                       | (G/A)       |
| 21591       | CakSNP21591    | <i>Kabuli</i>    | Ca_Kabuli_denovo             | 16007356                       | (G/C)       |
| 21592       | CakSNP21592    | <i>Kabuli</i>    | Ca_Kabuli_denovo             | 16016229                       | (T/C)       |
| 21593       | CakSNP21593    | <i>Kabuli</i>    | Ca_Kabuli_denovo             | 16018177                       | (C/T)       |
| 21594       | CakSNP21594    | <i>Kabuli</i>    | Ca_Kabuli_denovo             | 16019462                       | (G/C)       |
| 21595       | CakSNP21595    | <i>Kabuli</i>    | Ca_Kabuli_denovo             | 16032952                       | (G/C)       |
| 21596       | CakSNP21596    | <i>Kabuli</i>    | Ca_Kabuli_denovo             | 16035104                       | (T/A)       |
| 21597       | CakSNP21597    | <i>Kabuli</i>    | Ca_Kabuli_denovo             | 16035142                       | (T/C)       |
| 21598       | CakSNP21598    | <i>Kabuli</i>    | Ca_Kabuli_denovo             | 16042128                       | (A/C)       |
| 21599       | CakSNP21599    | <i>Kabuli</i>    | Ca_Kabuli_denovo             | 16045168                       | (G/T)       |
| 21600       | CakSNP21600    | <i>Kabuli</i>    | Ca_Kabuli_denovo             | 16046908                       | (A/G)       |
| 21601       | CakSNP21601    | <i>Kabuli</i>    | Ca_Kabuli_denovo             | 16051304                       | (C/T)       |
| 21602       | CakSNP21602    | <i>Kabuli</i>    | Ca_Kabuli_denovo             | 16053222                       | (G/A)       |
| 21603       | CakSNP21603    | <i>Kabuli</i>    | Ca_Kabuli_denovo             | 16059216                       | (G/C)       |
| 21604       | CakSNP21604    | <i>Kabuli</i>    | Ca_Kabuli_denovo             | 16063343                       | (G/A)       |
| 21605       | CakSNP21605    | <i>Kabuli</i>    | Ca_Kabuli_denovo             | 16063447                       | (T/G)       |
| 21606       | CakSNP21606    | <i>Kabuli</i>    | Ca_Kabuli_denovo             | 16063460                       | (A/C)       |
| 21607       | CakSNP21607    | <i>Kabuli</i>    | Ca_Kabuli_denovo             | 16064860                       | (C/G)       |
| 21608       | CakSNP21608    | <i>Kabuli</i>    | Ca_Kabuli_denovo             | 16072684                       | (A/G)       |
| 21609       | CakSNP21609    | <i>Kabuli</i>    | Ca_Kabuli_denovo             | 16077406                       | (A/C)       |
| 21610       | CakSNP21610    | <i>Kabuli</i>    | Ca_Kabuli_denovo             | 16083241                       | (T/G)       |
| 21611       | CakSNP21611    | <i>Kabuli</i>    | Ca_Kabuli_denovo             | 16088745                       | (T/C)       |
| 21612       | CakSNP21612    | <i>Kabuli</i>    | Ca_Kabuli_denovo             | 16088999                       | (A/C)       |
| 21613       | CakSNP21613    | <i>Kabuli</i>    | Ca_Kabuli_denovo             | 16089001                       | (A/C)       |
| 21614       | CakSNP21614    | <i>Kabuli</i>    | Ca_Kabuli_denovo             | 16091858                       | (T/G)       |
| 21615       | CakSNP21615    | <i>Kabuli</i>    | Ca_Kabuli_denovo             | 16104177                       | (G/A)       |
| 21616       | CakSNP21616    | <i>Kabuli</i>    | Ca_Kabuli_denovo             | 16107450                       | (C/T)       |
| 21617       | CakSNP21617    | <i>Kabuli</i>    | Ca_Kabuli_denovo             | 16107506                       | (G/A)       |
| 21618       | CakSNP21618    | <i>Kabuli</i>    | Ca_Kabuli_denovo             | 16114582                       | (A/G)       |
| 21619       | CakSNP21619    | <i>Kabuli</i>    | Ca_Kabuli_denovo             | 16115155                       | (C/T)       |
| 21620       | CakSNP21620    | <i>Kabuli</i>    | Ca_Kabuli_denovo             | 16115164                       | (C/A)       |
| 21621       | CakSNP21621    | <i>Kabuli</i>    | Ca_Kabuli_denovo             | 16116836                       | (T/G)       |

| <b>S.N.</b> | <b>SNP IDs</b> | <b>Cultivars</b> | <b>Chromosomes/scaffolds</b> | <b>Physical positions (bp)</b> | <b>SNPs</b> |
|-------------|----------------|------------------|------------------------------|--------------------------------|-------------|
| 21622       | CakSNP21622    | <i>Kabuli</i>    | Ca_Kabuli_denovo             | 16116890                       | (T/G)       |
| 21623       | CakSNP21623    | <i>Kabuli</i>    | Ca_Kabuli_denovo             | 16118811                       | (T/C)       |
| 21624       | CakSNP21624    | <i>Kabuli</i>    | Ca_Kabuli_denovo             | 16118838                       | (G/A)       |
| 21625       | CakSNP21625    | <i>Kabuli</i>    | Ca_Kabuli_denovo             | 16119632                       | (A/G)       |
| 21626       | CakSNP21626    | <i>Kabuli</i>    | Ca_Kabuli_denovo             | 16134211                       | (G/A)       |
| 21627       | CakSNP21627    | <i>Kabuli</i>    | Ca_Kabuli_denovo             | 16134249                       | (G/A)       |
| 21628       | CakSNP21628    | <i>Kabuli</i>    | Ca_Kabuli_denovo             | 16134580                       | (G/A)       |
| 21629       | CakSNP21629    | <i>Kabuli</i>    | Ca_Kabuli_denovo             | 16143666                       | (A/G)       |
| 21630       | CakSNP21630    | <i>Kabuli</i>    | Ca_Kabuli_denovo             | 16144928                       | (A/G)       |
| 21631       | CakSNP21631    | <i>Kabuli</i>    | Ca_Kabuli_denovo             | 16146300                       | (C/G)       |
| 21632       | CakSNP21632    | <i>Kabuli</i>    | Ca_Kabuli_denovo             | 16152938                       | (G/A)       |
| 21633       | CakSNP21633    | <i>Kabuli</i>    | Ca_Kabuli_denovo             | 16159144                       | (T/C)       |
| 21634       | CakSNP21634    | <i>Kabuli</i>    | Ca_Kabuli_denovo             | 16165826                       | (C/G)       |
| 21635       | CakSNP21635    | <i>Kabuli</i>    | Ca_Kabuli_denovo             | 16165837                       | (G/A)       |
| 21636       | CakSNP21636    | <i>Kabuli</i>    | Ca_Kabuli_denovo             | 16167983                       | (C/T)       |
| 21637       | CakSNP21637    | <i>Kabuli</i>    | Ca_Kabuli_denovo             | 16171075                       | (G/A)       |
| 21638       | CakSNP21638    | <i>Kabuli</i>    | Ca_Kabuli_denovo             | 16173457                       | (T/G)       |
| 21639       | CakSNP21639    | <i>Kabuli</i>    | Ca_Kabuli_denovo             | 16173469                       | (A/G)       |
| 21640       | CakSNP21640    | <i>Kabuli</i>    | Ca_Kabuli_denovo             | 16180337                       | (A/T)       |
| 21641       | CakSNP21641    | <i>Kabuli</i>    | Ca_Kabuli_denovo             | 16180369                       | (G/C)       |
| 21642       | CakSNP21642    | <i>Kabuli</i>    | Ca_Kabuli_denovo             | 16180679                       | (T/C)       |
| 21643       | CakSNP21643    | <i>Kabuli</i>    | Ca_Kabuli_denovo             | 16180694                       | (G/A)       |
| 21644       | CakSNP21644    | <i>Kabuli</i>    | Ca_Kabuli_denovo             | 16180697                       | (G/A)       |
| 21645       | CakSNP21645    | <i>Kabuli</i>    | Ca_Kabuli_denovo             | 16192364                       | (T/G)       |
| 21646       | CakSNP21646    | <i>Kabuli</i>    | Ca_Kabuli_denovo             | 16195262                       | (A/G)       |
| 21647       | CakSNP21647    | <i>Kabuli</i>    | Ca_Kabuli_denovo             | 16195265                       | (C/A)       |
| 21648       | CakSNP21648    | <i>Kabuli</i>    | Ca_Kabuli_denovo             | 16202129                       | (C/G)       |
| 21649       | CakSNP21649    | <i>Kabuli</i>    | Ca_Kabuli_denovo             | 16202257                       | (G/T)       |
| 21650       | CakSNP21650    | <i>Kabuli</i>    | Ca_Kabuli_denovo             | 16203514                       | (A/G)       |
| 21651       | CakSNP21651    | <i>Kabuli</i>    | Ca_Kabuli_denovo             | 16212822                       | (A/G)       |
| 21652       | CakSNP21652    | <i>Kabuli</i>    | Ca_Kabuli_denovo             | 16212833                       | (G/T)       |
| 21653       | CakSNP21653    | <i>Kabuli</i>    | Ca_Kabuli_denovo             | 16223803                       | (C/T)       |
| 21654       | CakSNP21654    | <i>Kabuli</i>    | Ca_Kabuli_denovo             | 16223835                       | (A/T)       |
| 21655       | CakSNP21655    | <i>Kabuli</i>    | Ca_Kabuli_denovo             | 16226517                       | (T/G)       |
| 21656       | CakSNP21656    | <i>Kabuli</i>    | Ca_Kabuli_denovo             | 16226520                       | (A/C)       |
| 21657       | CakSNP21657    | <i>Kabuli</i>    | Ca_Kabuli_denovo             | 16228102                       | (T/G)       |
| 21658       | CakSNP21658    | <i>Kabuli</i>    | Ca_Kabuli_denovo             | 16231770                       | (C/T)       |
| 21659       | CakSNP21659    | <i>Kabuli</i>    | Ca_Kabuli_denovo             | 16232648                       | (C/A)       |

| <b>S.N.</b> | <b>SNP IDs</b> | <b>Cultivars</b> | <b>Chromosomes/scaffolds</b> | <b>Physical positions (bp)</b> | <b>SNPs</b> |
|-------------|----------------|------------------|------------------------------|--------------------------------|-------------|
| 21660       | CakSNP21660    | <i>Kabuli</i>    | Ca_Kabuli_denovo             | 16234566                       | (G/T)       |
| 21661       | CakSNP21661    | <i>Kabuli</i>    | Ca_Kabuli_denovo             | 16234575                       | (G/A)       |
| 21662       | CakSNP21662    | <i>Kabuli</i>    | Ca_Kabuli_denovo             | 16240526                       | (G/A)       |
| 21663       | CakSNP21663    | <i>Kabuli</i>    | Ca_Kabuli_denovo             | 16244719                       | (A/T)       |
| 21664       | CakSNP21664    | <i>Kabuli</i>    | Ca_Kabuli_denovo             | 16247333                       | (G/A)       |
| 21665       | CakSNP21665    | <i>Kabuli</i>    | Ca_Kabuli_denovo             | 16247374                       | (C/T)       |
| 21666       | CakSNP21666    | <i>Kabuli</i>    | Ca_Kabuli_denovo             | 16260126                       | (G/C)       |
| 21667       | CakSNP21667    | <i>Kabuli</i>    | Ca_Kabuli_denovo             | 16260137                       | (A/G)       |
| 21668       | CakSNP21668    | <i>Kabuli</i>    | Ca_Kabuli_denovo             | 16260601                       | (C/T)       |
| 21669       | CakSNP21669    | <i>Kabuli</i>    | Ca_Kabuli_denovo             | 16260619                       | (G/A)       |
| 21670       | CakSNP21670    | <i>Kabuli</i>    | Ca_Kabuli_denovo             | 16262566                       | (G/C)       |
| 21671       | CakSNP21671    | <i>Kabuli</i>    | Ca_Kabuli_denovo             | 16263211                       | (C/T)       |
| 21672       | CakSNP21672    | <i>Kabuli</i>    | Ca_Kabuli_denovo             | 16263606                       | (A/T)       |
| 21673       | CakSNP21673    | <i>Kabuli</i>    | Ca_Kabuli_denovo             | 16263609                       | (T/C)       |
| 21674       | CakSNP21674    | <i>Kabuli</i>    | Ca_Kabuli_denovo             | 16265172                       | (C/G)       |
| 21675       | CakSNP21675    | <i>Kabuli</i>    | Ca_Kabuli_denovo             | 16266042                       | (T/G)       |
| 21676       | CakSNP21676    | <i>Kabuli</i>    | Ca_Kabuli_denovo             | 16280261                       | (C/A)       |
| 21677       | CakSNP21677    | <i>Kabuli</i>    | Ca_Kabuli_denovo             | 16280269                       | (C/T)       |
| 21678       | CakSNP21678    | <i>Kabuli</i>    | Ca_Kabuli_denovo             | 16285150                       | (C/T)       |
| 21679       | CakSNP21679    | <i>Kabuli</i>    | Ca_Kabuli_denovo             | 16285196                       | (C/T)       |
| 21680       | CakSNP21680    | <i>Kabuli</i>    | Ca_Kabuli_denovo             | 16285228                       | (G/C)       |
| 21681       | CakSNP21681    | <i>Kabuli</i>    | Ca_Kabuli_denovo             | 16287350                       | (G/C)       |
| 21682       | CakSNP21682    | <i>Kabuli</i>    | Ca_Kabuli_denovo             | 16287361                       | (C/T)       |
| 21683       | CakSNP21683    | <i>Kabuli</i>    | Ca_Kabuli_denovo             | 16293927                       | (C/T)       |
| 21684       | CakSNP21684    | <i>Kabuli</i>    | Ca_Kabuli_denovo             | 16304638                       | (C/G)       |
| 21685       | CakSNP21685    | <i>Kabuli</i>    | Ca_Kabuli_denovo             | 16304644                       | (G/A)       |
| 21686       | CakSNP21686    | <i>Kabuli</i>    | Ca_Kabuli_denovo             | 16309405                       | (C/T)       |
| 21687       | CakSNP21687    | <i>Kabuli</i>    | Ca_Kabuli_denovo             | 16310098                       | (A/C)       |
| 21688       | CakSNP21688    | <i>Kabuli</i>    | Ca_Kabuli_denovo             | 16311865                       | (A/G)       |
| 21689       | CakSNP21689    | <i>Kabuli</i>    | Ca_Kabuli_denovo             | 16318334                       | (A/C)       |
| 21690       | CakSNP21690    | <i>Kabuli</i>    | Ca_Kabuli_denovo             | 16321322                       | (G/A)       |
| 21691       | CakSNP21691    | <i>Kabuli</i>    | Ca_Kabuli_denovo             | 16321357                       | (G/T)       |
| 21692       | CakSNP21692    | <i>Kabuli</i>    | Ca_Kabuli_denovo             | 16323646                       | (C/T)       |
| 21693       | CakSNP21693    | <i>Kabuli</i>    | Ca_Kabuli_denovo             | 16323653                       | (G/A)       |
| 21694       | CakSNP21694    | <i>Kabuli</i>    | Ca_Kabuli_denovo             | 16324174                       | (T/C)       |
| 21695       | CakSNP21695    | <i>Kabuli</i>    | Ca_Kabuli_denovo             | 16324198                       | (G/C)       |
| 21696       | CakSNP21696    | <i>Kabuli</i>    | Ca_Kabuli_denovo             | 16326296                       | (A/G)       |
| 21697       | CakSNP21697    | <i>Kabuli</i>    | Ca_Kabuli_denovo             | 16326326                       | (T/C)       |

| <b>S.N.</b> | <b>SNP IDs</b> | <b>Cultivars</b> | <b>Chromosomes/scaffolds</b> | <b>Physical positions (bp)</b> | <b>SNPs</b> |
|-------------|----------------|------------------|------------------------------|--------------------------------|-------------|
| 21698       | CakSNP21698    | <i>Kabuli</i>    | Ca_Kabuli_denovo             | 16327612                       | (G/T)       |
| 21699       | CakSNP21699    | <i>Kabuli</i>    | Ca_Kabuli_denovo             | 16329733                       | (T/G)       |
| 21700       | CakSNP21700    | <i>Kabuli</i>    | Ca_Kabuli_denovo             | 16329739                       | (T/C)       |
| 21701       | CakSNP21701    | <i>Kabuli</i>    | Ca_Kabuli_denovo             | 16331645                       | (T/C)       |
| 21702       | CakSNP21702    | <i>Kabuli</i>    | Ca_Kabuli_denovo             | 16332497                       | (A/G)       |
| 21703       | CakSNP21703    | <i>Kabuli</i>    | Ca_Kabuli_denovo             | 16335146                       | (A/G)       |
| 21704       | CakSNP21704    | <i>Kabuli</i>    | Ca_Kabuli_denovo             | 16337697                       | (A/C)       |
| 21705       | CakSNP21705    | <i>Kabuli</i>    | Ca_Kabuli_denovo             | 16338451                       | (T/C)       |
| 21706       | CakSNP21706    | <i>Kabuli</i>    | Ca_Kabuli_denovo             | 16338474                       | (T/G)       |
| 21707       | CakSNP21707    | <i>Kabuli</i>    | Ca_Kabuli_denovo             | 16345856                       | (C/G)       |
| 21708       | CakSNP21708    | <i>Kabuli</i>    | Ca_Kabuli_denovo             | 16360422                       | (C/T)       |
| 21709       | CakSNP21709    | <i>Kabuli</i>    | Ca_Kabuli_denovo             | 16366147                       | (A/C)       |
| 21710       | CakSNP21710    | <i>Kabuli</i>    | Ca_Kabuli_denovo             | 16366177                       | (T/C)       |
| 21711       | CakSNP21711    | <i>Kabuli</i>    | Ca_Kabuli_denovo             | 16374055                       | (C/T)       |
| 21712       | CakSNP21712    | <i>Kabuli</i>    | Ca_Kabuli_denovo             | 16374136                       | (C/A)       |
| 21713       | CakSNP21713    | <i>Kabuli</i>    | Ca_Kabuli_denovo             | 16379800                       | (G/A)       |
| 21714       | CakSNP21714    | <i>Kabuli</i>    | Ca_Kabuli_denovo             | 16380555                       | (A/G)       |
| 21715       | CakSNP21715    | <i>Kabuli</i>    | Ca_Kabuli_denovo             | 16382611                       | (C/T)       |
| 21716       | CakSNP21716    | <i>Kabuli</i>    | Ca_Kabuli_denovo             | 16386909                       | (T/G)       |
| 21717       | CakSNP21717    | <i>Kabuli</i>    | Ca_Kabuli_denovo             | 16386939                       | (A/G)       |
| 21718       | CakSNP21718    | <i>Kabuli</i>    | Ca_Kabuli_denovo             | 16395993                       | (A/C)       |
| 21719       | CakSNP21719    | <i>Kabuli</i>    | Ca_Kabuli_denovo             | 16395994                       | (G/A)       |
| 21720       | CakSNP21720    | <i>Kabuli</i>    | Ca_Kabuli_denovo             | 16396510                       | (A/G)       |
| 21721       | CakSNP21721    | <i>Kabuli</i>    | Ca_Kabuli_denovo             | 16396541                       | (A/G)       |
| 21722       | CakSNP21722    | <i>Kabuli</i>    | Ca_Kabuli_denovo             | 16399727                       | (C/G)       |
| 21723       | CakSNP21723    | <i>Kabuli</i>    | Ca_Kabuli_denovo             | 16400456                       | (A/C)       |
| 21724       | CakSNP21724    | <i>Kabuli</i>    | Ca_Kabuli_denovo             | 16400458                       | (A/G)       |
| 21725       | CakSNP21725    | <i>Kabuli</i>    | Ca_Kabuli_denovo             | 16403710                       | (T/G)       |
| 21726       | CakSNP21726    | <i>Kabuli</i>    | Ca_Kabuli_denovo             | 16407355                       | (T/G)       |
| 21727       | CakSNP21727    | <i>Kabuli</i>    | Ca_Kabuli_denovo             | 16407358                       | (G/C)       |
| 21728       | CakSNP21728    | <i>Kabuli</i>    | Ca_Kabuli_denovo             | 16408072                       | (T/C)       |
| 21729       | CakSNP21729    | <i>Kabuli</i>    | Ca_Kabuli_denovo             | 16419017                       | (G/T)       |
| 21730       | CakSNP21730    | <i>Kabuli</i>    | Ca_Kabuli_denovo             | 16419044                       | (T/C)       |
| 21731       | CakSNP21731    | <i>Kabuli</i>    | Ca_Kabuli_denovo             | 16422703                       | (G/C)       |
| 21732       | CakSNP21732    | <i>Kabuli</i>    | Ca_Kabuli_denovo             | 16423796                       | (C/G)       |
| 21733       | CakSNP21733    | <i>Kabuli</i>    | Ca_Kabuli_denovo             | 16431153                       | (A/G)       |
| 21734       | CakSNP21734    | <i>Kabuli</i>    | Ca_Kabuli_denovo             | 16431161                       | (G/A)       |
| 21735       | CakSNP21735    | <i>Kabuli</i>    | Ca_Kabuli_denovo             | 16432329                       | (A/G)       |

| <b>S.N.</b> | <b>SNP IDs</b> | <b>Cultivars</b> | <b>Chromosomes/scaffolds</b> | <b>Physical positions (bp)</b> | <b>SNPs</b> |
|-------------|----------------|------------------|------------------------------|--------------------------------|-------------|
| 21736       | CakSNP21736    | <i>Kabuli</i>    | Ca_Kabuli_denovo             | 16433327                       | (G/A)       |
| 21737       | CakSNP21737    | <i>Kabuli</i>    | Ca_Kabuli_denovo             | 16433379                       | (A/G)       |
| 21738       | CakSNP21738    | <i>Kabuli</i>    | Ca_Kabuli_denovo             | 16433532                       | (T/C)       |
| 21739       | CakSNP21739    | <i>Kabuli</i>    | Ca_Kabuli_denovo             | 16433951                       | (A/G)       |
| 21740       | CakSNP21740    | <i>Kabuli</i>    | Ca_Kabuli_denovo             | 16433958                       | (T/C)       |
| 21741       | CakSNP21741    | <i>Kabuli</i>    | Ca_Kabuli_denovo             | 16433964                       | (T/C)       |
| 21742       | CakSNP21742    | <i>Kabuli</i>    | Ca_Kabuli_denovo             | 16438515                       | (G/C)       |
| 21743       | CakSNP21743    | <i>Kabuli</i>    | Ca_Kabuli_denovo             | 16438572                       | (G/T)       |
| 21744       | CakSNP21744    | <i>Kabuli</i>    | Ca_Kabuli_denovo             | 16439398                       | (G/C)       |
| 21745       | CakSNP21745    | <i>Kabuli</i>    | Ca_Kabuli_denovo             | 16439416                       | (T/C)       |
| 21746       | CakSNP21746    | <i>Kabuli</i>    | Ca_Kabuli_denovo             | 16442634                       | (G/A)       |
| 21747       | CakSNP21747    | <i>Kabuli</i>    | Ca_Kabuli_denovo             | 16442868                       | (A/T)       |
| 21748       | CakSNP21748    | <i>Kabuli</i>    | Ca_Kabuli_denovo             | 16443463                       | (G/A)       |
| 21749       | CakSNP21749    | <i>Kabuli</i>    | Ca_Kabuli_denovo             | 16443487                       | (C/T)       |
| 21750       | CakSNP21750    | <i>Kabuli</i>    | Ca_Kabuli_denovo             | 16446001                       | (T/C)       |
| 21751       | CakSNP21751    | <i>Kabuli</i>    | Ca_Kabuli_denovo             | 16446028                       | (A/T)       |
| 21752       | CakSNP21752    | <i>Kabuli</i>    | Ca_Kabuli_denovo             | 16446612                       | (C/G)       |
| 21753       | CakSNP21753    | <i>Kabuli</i>    | Ca_Kabuli_denovo             | 16446660                       | (C/T)       |
| 21754       | CakSNP21754    | <i>Kabuli</i>    | Ca_Kabuli_denovo             | 16448652                       | (C/T)       |
| 21755       | CakSNP21755    | <i>Kabuli</i>    | Ca_Kabuli_denovo             | 16448673                       | (C/T)       |
| 21756       | CakSNP21756    | <i>Kabuli</i>    | Ca_Kabuli_denovo             | 16450928                       | (C/T)       |
| 21757       | CakSNP21757    | <i>Kabuli</i>    | Ca_Kabuli_denovo             | 16450936                       | (G/C)       |
| 21758       | CakSNP21758    | <i>Kabuli</i>    | Ca_Kabuli_denovo             | 16454737                       | (A/G)       |
| 21759       | CakSNP21759    | <i>Kabuli</i>    | Ca_Kabuli_denovo             | 16454742                       | (C/T)       |
| 21760       | CakSNP21760    | <i>Kabuli</i>    | Ca_Kabuli_denovo             | 16463528                       | (C/G)       |
| 21761       | CakSNP21761    | <i>Kabuli</i>    | Ca_Kabuli_denovo             | 16463533                       | (A/C)       |
| 21762       | CakSNP21762    | <i>Kabuli</i>    | Ca_Kabuli_denovo             | 16466561                       | (G/C)       |
| 21763       | CakSNP21763    | <i>Kabuli</i>    | Ca_Kabuli_denovo             | 16478129                       | (C/T)       |
| 21764       | CakSNP21764    | <i>Kabuli</i>    | Ca_Kabuli_denovo             | 16480207                       | (G/A)       |
| 21765       | CakSNP21765    | <i>Kabuli</i>    | Ca_Kabuli_denovo             | 16481213                       | (T/C)       |
| 21766       | CakSNP21766    | <i>Kabuli</i>    | Ca_Kabuli_denovo             | 16481216                       | (C/G)       |
| 21767       | CakSNP21767    | <i>Kabuli</i>    | Ca_Kabuli_denovo             | 16488089                       | (C/G)       |
| 21768       | CakSNP21768    | <i>Kabuli</i>    | Ca_Kabuli_denovo             | 16491339                       | (G/A)       |
| 21769       | CakSNP21769    | <i>Kabuli</i>    | Ca_Kabuli_denovo             | 16493110                       | (C/G)       |
| 21770       | CakSNP21770    | <i>Kabuli</i>    | Ca_Kabuli_denovo             | 16493176                       | (T/C)       |
| 21771       | CakSNP21771    | <i>Kabuli</i>    | Ca_Kabuli_denovo             | 16493859                       | (C/T)       |
| 21772       | CakSNP21772    | <i>Kabuli</i>    | Ca_Kabuli_denovo             | 16493864                       | (G/A)       |
| 21773       | CakSNP21773    | <i>Kabuli</i>    | Ca_Kabuli_denovo             | 16495795                       | (T/G)       |

| <b>S.N.</b> | <b>SNP IDs</b> | <b>Cultivars</b> | <b>Chromosomes/scaffolds</b> | <b>Physical positions (bp)</b> | <b>SNPs</b> |
|-------------|----------------|------------------|------------------------------|--------------------------------|-------------|
| 21774       | CakSNP21774    | <i>Kabuli</i>    | Ca_Kabuli_denovo             | 16495801                       | (A/G)       |
| 21775       | CakSNP21775    | <i>Kabuli</i>    | Ca_Kabuli_denovo             | 16499520                       | (A/G)       |
| 21776       | CakSNP21776    | <i>Kabuli</i>    | Ca_Kabuli_denovo             | 16499555                       | (C/A)       |
| 21777       | CakSNP21777    | <i>Kabuli</i>    | Ca_Kabuli_denovo             | 16500677                       | (A/G)       |
| 21778       | CakSNP21778    | <i>Kabuli</i>    | Ca_Kabuli_denovo             | 16500683                       | (A/G)       |
| 21779       | CakSNP21779    | <i>Kabuli</i>    | Ca_Kabuli_denovo             | 16501449                       | (T/G)       |
| 21780       | CakSNP21780    | <i>Kabuli</i>    | Ca_Kabuli_denovo             | 16503695                       | (G/C)       |
| 21781       | CakSNP21781    | <i>Kabuli</i>    | Ca_Kabuli_denovo             | 16506410                       | (C/G)       |
| 21782       | CakSNP21782    | <i>Kabuli</i>    | Ca_Kabuli_denovo             | 16506452                       | (C/T)       |
| 21783       | CakSNP21783    | <i>Kabuli</i>    | Ca_Kabuli_denovo             | 16506584                       | (C/G)       |
| 21784       | CakSNP21784    | <i>Kabuli</i>    | Ca_Kabuli_denovo             | 16506595                       | (A/C)       |
| 21785       | CakSNP21785    | <i>Kabuli</i>    | Ca_Kabuli_denovo             | 16506801                       | (C/T)       |
| 21786       | CakSNP21786    | <i>Kabuli</i>    | Ca_Kabuli_denovo             | 16506848                       | (T/G)       |
| 21787       | CakSNP21787    | <i>Kabuli</i>    | Ca_Kabuli_denovo             | 16507564                       | (T/G)       |
| 21788       | CakSNP21788    | <i>Kabuli</i>    | Ca_Kabuli_denovo             | 16507589                       | (T/G)       |
| 21789       | CakSNP21789    | <i>Kabuli</i>    | Ca_Kabuli_denovo             | 16511992                       | (G/A)       |
| 21790       | CakSNP21790    | <i>Kabuli</i>    | Ca_Kabuli_denovo             | 16516079                       | (T/C)       |
| 21791       | CakSNP21791    | <i>Kabuli</i>    | Ca_Kabuli_denovo             | 16518646                       | (A/G)       |
| 21792       | CakSNP21792    | <i>Kabuli</i>    | Ca_Kabuli_denovo             | 16521054                       | (G/C)       |
| 21793       | CakSNP21793    | <i>Kabuli</i>    | Ca_Kabuli_denovo             | 16523681                       | (A/G)       |
| 21794       | CakSNP21794    | <i>Kabuli</i>    | Ca_Kabuli_denovo             | 16527540                       | (A/G)       |
| 21795       | CakSNP21795    | <i>Kabuli</i>    | Ca_Kabuli_denovo             | 16527703                       | (T/C)       |
| 21796       | CakSNP21796    | <i>Kabuli</i>    | Ca_Kabuli_denovo             | 16527716                       | (G/A)       |
| 21797       | CakSNP21797    | <i>Kabuli</i>    | Ca_Kabuli_denovo             | 16531688                       | (G/C)       |
| 21798       | CakSNP21798    | <i>Kabuli</i>    | Ca_Kabuli_denovo             | 16531733                       | (G/C)       |
| 21799       | CakSNP21799    | <i>Kabuli</i>    | Ca_Kabuli_denovo             | 16535101                       | (C/A)       |
| 21800       | CakSNP21800    | <i>Kabuli</i>    | Ca_Kabuli_denovo             | 16537066                       | (C/A)       |
| 21801       | CakSNP21801    | <i>Kabuli</i>    | Ca_Kabuli_denovo             | 16538701                       | (C/T)       |
| 21802       | CakSNP21802    | <i>Kabuli</i>    | Ca_Kabuli_denovo             | 16538725                       | (G/T)       |
| 21803       | CakSNP21803    | <i>Kabuli</i>    | Ca_Kabuli_denovo             | 16540897                       | (G/T)       |
| 21804       | CakSNP21804    | <i>Kabuli</i>    | Ca_Kabuli_denovo             | 16540932                       | (T/C)       |
| 21805       | CakSNP21805    | <i>Kabuli</i>    | Ca_Kabuli_denovo             | 16541788                       | (T/C)       |
| 21806       | CakSNP21806    | <i>Kabuli</i>    | Ca_Kabuli_denovo             | 16541815                       | (C/G)       |
| 21807       | CakSNP21807    | <i>Kabuli</i>    | Ca_Kabuli_denovo             | 16541818                       | (C/T)       |
| 21808       | CakSNP21808    | <i>Kabuli</i>    | Ca_Kabuli_denovo             | 16542667                       | (T/C)       |
| 21809       | CakSNP21809    | <i>Kabuli</i>    | Ca_Kabuli_denovo             | 16543444                       | (T/C)       |
| 21810       | CakSNP21810    | <i>Kabuli</i>    | Ca_Kabuli_denovo             | 16548536                       | (G/A)       |
| 21811       | CakSNP21811    | <i>Kabuli</i>    | Ca_Kabuli_denovo             | 16548706                       | (T/G)       |



| <b>S.N.</b> | <b>SNP IDs</b> | <b>Cultivars</b> | <b>Chromosomes/scaffolds</b> | <b>Physical positions (bp)</b> | <b>SNPs</b> |
|-------------|----------------|------------------|------------------------------|--------------------------------|-------------|
| 21812       | CakSNP21812    | <i>Kabuli</i>    | Ca_Kabuli_denovo             | 16548709                       | (C/T)       |
| 21813       | CakSNP21813    | <i>Kabuli</i>    | Ca_Kabuli_denovo             | 16550594                       | (A/G)       |
| 21814       | CakSNP21814    | <i>Kabuli</i>    | Ca_Kabuli_denovo             | 16550597                       | (G/C)       |
| 21815       | CakSNP21815    | <i>Kabuli</i>    | Ca_Kabuli_denovo             | 16550753                       | (T/G)       |
| 21816       | CakSNP21816    | <i>Kabuli</i>    | Ca_Kabuli_denovo             | 16551596                       | (T/C)       |
| 21817       | CakSNP21817    | <i>Kabuli</i>    | Ca_Kabuli_denovo             | 16551608                       | (C/T)       |
| 21818       | CakSNP21818    | <i>Kabuli</i>    | Ca_Kabuli_denovo             | 16551984                       | (C/G)       |
| 21819       | CakSNP21819    | <i>Kabuli</i>    | Ca_Kabuli_denovo             | 16552001                       | (C/G)       |
| 21820       | CakSNP21820    | <i>Kabuli</i>    | Ca_Kabuli_denovo             | 16555320                       | (A/G)       |
| 21821       | CakSNP21821    | <i>Kabuli</i>    | Ca_Kabuli_denovo             | 16555331                       | (A/G)       |
| 21822       | CakSNP21822    | <i>Kabuli</i>    | Ca_Kabuli_denovo             | 16555347                       | (C/T)       |
| 21823       | CakSNP21823    | <i>Kabuli</i>    | Ca_Kabuli_denovo             | 16563232                       | (C/G)       |
| 21824       | CakSNP21824    | <i>Kabuli</i>    | Ca_Kabuli_denovo             | 16568993                       | (G/T)       |
| 21825       | CakSNP21825    | <i>Kabuli</i>    | Ca_Kabuli_denovo             | 16568994                       | (T/C)       |
| 21826       | CakSNP21826    | <i>Kabuli</i>    | Ca_Kabuli_denovo             | 16573820                       | (G/C)       |
| 21827       | CakSNP21827    | <i>Kabuli</i>    | Ca_Kabuli_denovo             | 16573891                       | (C/T)       |
| 21828       | CakSNP21828    | <i>Kabuli</i>    | Ca_Kabuli_denovo             | 16573900                       | (C/G)       |
| 21829       | CakSNP21829    | <i>Kabuli</i>    | Ca_Kabuli_denovo             | 16573903                       | (C/T)       |
| 21830       | CakSNP21830    | <i>Kabuli</i>    | Ca_Kabuli_denovo             | 16575551                       | (A/G)       |
| 21831       | CakSNP21831    | <i>Kabuli</i>    | Ca_Kabuli_denovo             | 16577951                       | (G/A)       |
| 21832       | CakSNP21832    | <i>Kabuli</i>    | Ca_Kabuli_denovo             | 16577959                       | (G/T)       |
| 21833       | CakSNP21833    | <i>Kabuli</i>    | Ca_Kabuli_denovo             | 16578568                       | (C/T)       |
| 21834       | CakSNP21834    | <i>Kabuli</i>    | Ca_Kabuli_denovo             | 16585761                       | (C/T)       |
| 21835       | CakSNP21835    | <i>Kabuli</i>    | Ca_Kabuli_denovo             | 16589452                       | (G/A)       |
| 21836       | CakSNP21836    | <i>Kabuli</i>    | Ca_Kabuli_denovo             | 16590210                       | (G/C)       |
| 21837       | CakSNP21837    | <i>Kabuli</i>    | Ca_Kabuli_denovo             | 16590229                       | (C/G)       |
| 21838       | CakSNP21838    | <i>Kabuli</i>    | Ca_Kabuli_denovo             | 16611748                       | (C/T)       |
| 21839       | CakSNP21839    | <i>Kabuli</i>    | Ca_Kabuli_denovo             | 16613548                       | (A/G)       |
| 21840       | CakSNP21840    | <i>Kabuli</i>    | Ca_Kabuli_denovo             | 16616090                       | (G/A)       |
| 21841       | CakSNP21841    | <i>Kabuli</i>    | Ca_Kabuli_denovo             | 16616105                       | (A/G)       |
| 21842       | CakSNP21842    | <i>Kabuli</i>    | Ca_Kabuli_denovo             | 16616806                       | (C/A)       |
| 21843       | CakSNP21843    | <i>Kabuli</i>    | Ca_Kabuli_denovo             | 16619801                       | (C/A)       |
| 21844       | CakSNP21844    | <i>Kabuli</i>    | Ca_Kabuli_denovo             | 16623076                       | (A/G)       |
| 21845       | CakSNP21845    | <i>Kabuli</i>    | Ca_Kabuli_denovo             | 16626028                       | (C/A)       |
| 21846       | CakSNP21846    | <i>Kabuli</i>    | Ca_Kabuli_denovo             | 16626043                       | (A/G)       |
| 21847       | CakSNP21847    | <i>Kabuli</i>    | Ca_Kabuli_denovo             | 16629782                       | (C/T)       |
| 21848       | CakSNP21848    | <i>Kabuli</i>    | Ca_Kabuli_denovo             | 16643323                       | (A/G)       |
| 21849       | CakSNP21849    | <i>Kabuli</i>    | Ca_Kabuli_denovo             | 16648155                       | (A/G)       |

| <b>S.N.</b> | <b>SNP IDs</b> | <b>Cultivars</b> | <b>Chromosomes/scaffolds</b> | <b>Physical positions (bp)</b> | <b>SNPs</b> |
|-------------|----------------|------------------|------------------------------|--------------------------------|-------------|
| 21850       | CakSNP21850    | <i>Kabuli</i>    | Ca_Kabuli_denovo             | 16653157                       | (T/C)       |
| 21851       | CakSNP21851    | <i>Kabuli</i>    | Ca_Kabuli_denovo             | 16665169                       | (T/C)       |
| 21852       | CakSNP21852    | <i>Kabuli</i>    | Ca_Kabuli_denovo             | 16669271                       | (T/G)       |
| 21853       | CakSNP21853    | <i>Kabuli</i>    | Ca_Kabuli_denovo             | 16669353                       | (G/C)       |
| 21854       | CakSNP21854    | <i>Kabuli</i>    | Ca_Kabuli_denovo             | 16669354                       | (G/C)       |
| 21855       | CakSNP21855    | <i>Kabuli</i>    | Ca_Kabuli_denovo             | 16672658                       | (C/G)       |
| 21856       | CakSNP21856    | <i>Kabuli</i>    | Ca_Kabuli_denovo             | 16673523                       | (C/T)       |
| 21857       | CakSNP21857    | <i>Kabuli</i>    | Ca_Kabuli_denovo             | 16673532                       | (T/A)       |
| 21858       | CakSNP21858    | <i>Kabuli</i>    | Ca_Kabuli_denovo             | 16673632                       | (C/A)       |
| 21859       | CakSNP21859    | <i>Kabuli</i>    | Ca_Kabuli_denovo             | 16678096                       | (A/G)       |
| 21860       | CakSNP21860    | <i>Kabuli</i>    | Ca_Kabuli_denovo             | 16678143                       | (G/T)       |
| 21861       | CakSNP21861    | <i>Kabuli</i>    | Ca_Kabuli_denovo             | 16691722                       | (T/A)       |
| 21862       | CakSNP21862    | <i>Kabuli</i>    | Ca_Kabuli_denovo             | 16700868                       | (G/C)       |
| 21863       | CakSNP21863    | <i>Kabuli</i>    | Ca_Kabuli_denovo             | 16706187                       | (G/C)       |
| 21864       | CakSNP21864    | <i>Kabuli</i>    | Ca_Kabuli_denovo             | 16706241                       | (G/A)       |
| 21865       | CakSNP21865    | <i>Kabuli</i>    | Ca_Kabuli_denovo             | 16707329                       | (G/A)       |
| 21866       | CakSNP21866    | <i>Kabuli</i>    | Ca_Kabuli_denovo             | 16707356                       | (A/C)       |
| 21867       | CakSNP21867    | <i>Kabuli</i>    | Ca_Kabuli_denovo             | 16708337                       | (A/G)       |
| 21868       | CakSNP21868    | <i>Kabuli</i>    | Ca_Kabuli_denovo             | 16715210                       | (A/G)       |
| 21869       | CakSNP21869    | <i>Kabuli</i>    | Ca_Kabuli_denovo             | 16715216                       | (A/C)       |
| 21870       | CakSNP21870    | <i>Kabuli</i>    | Ca_Kabuli_denovo             | 16720077                       | (T/G)       |
| 21871       | CakSNP21871    | <i>Kabuli</i>    | Ca_Kabuli_denovo             | 16720096                       | (C/A)       |
| 21872       | CakSNP21872    | <i>Kabuli</i>    | Ca_Kabuli_denovo             | 16723012                       | (G/A)       |
| 21873       | CakSNP21873    | <i>Kabuli</i>    | Ca_Kabuli_denovo             | 16724754                       | (A/G)       |
| 21874       | CakSNP21874    | <i>Kabuli</i>    | Ca_Kabuli_denovo             | 16724832                       | (T/C)       |
| 21875       | CakSNP21875    | <i>Kabuli</i>    | Ca_Kabuli_denovo             | 16725436                       | (T/C)       |
| 21876       | CakSNP21876    | <i>Kabuli</i>    | Ca_Kabuli_denovo             | 16728254                       | (A/C)       |
| 21877       | CakSNP21877    | <i>Kabuli</i>    | Ca_Kabuli_denovo             | 16734735                       | (A/G)       |
| 21878       | CakSNP21878    | <i>Kabuli</i>    | Ca_Kabuli_denovo             | 16738628                       | (C/T)       |
| 21879       | CakSNP21879    | <i>Kabuli</i>    | Ca_Kabuli_denovo             | 16741741                       | (T/C)       |
| 21880       | CakSNP21880    | <i>Kabuli</i>    | Ca_Kabuli_denovo             | 16745312                       | (T/G)       |
| 21881       | CakSNP21881    | <i>Kabuli</i>    | Ca_Kabuli_denovo             | 16745357                       | (C/T)       |
| 21882       | CakSNP21882    | <i>Kabuli</i>    | Ca_Kabuli_denovo             | 16749543                       | (C/T)       |
| 21883       | CakSNP21883    | <i>Kabuli</i>    | Ca_Kabuli_denovo             | 16753524                       | (T/C)       |
| 21884       | CakSNP21884    | <i>Kabuli</i>    | Ca_Kabuli_denovo             | 16756754                       | (T/G)       |
| 21885       | CakSNP21885    | <i>Kabuli</i>    | Ca_Kabuli_denovo             | 16756778                       | (C/G)       |
| 21886       | CakSNP21886    | <i>Kabuli</i>    | Ca_Kabuli_denovo             | 16759066                       | (A/C)       |
| 21887       | CakSNP21887    | <i>Kabuli</i>    | Ca_Kabuli_denovo             | 16763119                       | (G/C)       |

| <b>S.N.</b> | <b>SNP IDs</b> | <b>Cultivars</b> | <b>Chromosomes/scaffolds</b> | <b>Physical positions (bp)</b> | <b>SNPs</b> |
|-------------|----------------|------------------|------------------------------|--------------------------------|-------------|
| 21888       | CakSNP21888    | <i>Kabuli</i>    | Ca_Kabuli_denovo             | 16768916                       | (C/T)       |
| 21889       | CakSNP21889    | <i>Kabuli</i>    | Ca_Kabuli_denovo             | 16770864                       | (C/T)       |
| 21890       | CakSNP21890    | <i>Kabuli</i>    | Ca_Kabuli_denovo             | 16773167                       | (G/A)       |
| 21891       | CakSNP21891    | <i>Kabuli</i>    | Ca_Kabuli_denovo             | 16773169                       | (T/C)       |
| 21892       | CakSNP21892    | <i>Kabuli</i>    | Ca_Kabuli_denovo             | 16775909                       | (G/C)       |
| 21893       | CakSNP21893    | <i>Kabuli</i>    | Ca_Kabuli_denovo             | 16792384                       | (G/T)       |
| 21894       | CakSNP21894    | <i>Kabuli</i>    | Ca_Kabuli_denovo             | 16792385                       | (T/C)       |
| 21895       | CakSNP21895    | <i>Kabuli</i>    | Ca_Kabuli_denovo             | 16795334                       | (A/C)       |
| 21896       | CakSNP21896    | <i>Kabuli</i>    | Ca_Kabuli_denovo             | 16796009                       | (G/C)       |
| 21897       | CakSNP21897    | <i>Kabuli</i>    | Ca_Kabuli_denovo             | 16797381                       | (A/C)       |
| 21898       | CakSNP21898    | <i>Kabuli</i>    | Ca_Kabuli_denovo             | 16798070                       | (T/G)       |
| 21899       | CakSNP21899    | <i>Kabuli</i>    | Ca_Kabuli_denovo             | 16800967                       | (G/C)       |
| 21900       | CakSNP21900    | <i>Kabuli</i>    | Ca_Kabuli_denovo             | 16800982                       | (G/A)       |
| 21901       | CakSNP21901    | <i>Kabuli</i>    | Ca_Kabuli_denovo             | 16805285                       | (A/C)       |
| 21902       | CakSNP21902    | <i>Kabuli</i>    | Ca_Kabuli_denovo             | 16806851                       | (A/G)       |
| 21903       | CakSNP21903    | <i>Kabuli</i>    | Ca_Kabuli_denovo             | 16810319                       | (C/G)       |
| 21904       | CakSNP21904    | <i>Kabuli</i>    | Ca_Kabuli_denovo             | 16810328                       | (G/T)       |
| 21905       | CakSNP21905    | <i>Kabuli</i>    | Ca_Kabuli_denovo             | 16811019                       | (A/G)       |
| 21906       | CakSNP21906    | <i>Kabuli</i>    | Ca_Kabuli_denovo             | 16817728                       | (C/T)       |
| 21907       | CakSNP21907    | <i>Kabuli</i>    | Ca_Kabuli_denovo             | 16818477                       | (G/T)       |
| 21908       | CakSNP21908    | <i>Kabuli</i>    | Ca_Kabuli_denovo             | 16822925                       | (G/A)       |
| 21909       | CakSNP21909    | <i>Kabuli</i>    | Ca_Kabuli_denovo             | 16839161                       | (T/C)       |
| 21910       | CakSNP21910    | <i>Kabuli</i>    | Ca_Kabuli_denovo             | 16847104                       | (G/A)       |
| 21911       | CakSNP21911    | <i>Kabuli</i>    | Ca_Kabuli_denovo             | 16847905                       | (T/G)       |
| 21912       | CakSNP21912    | <i>Kabuli</i>    | Ca_Kabuli_denovo             | 16847915                       | (T/C)       |
| 21913       | CakSNP21913    | <i>Kabuli</i>    | Ca_Kabuli_denovo             | 16848678                       | (A/G)       |
| 21914       | CakSNP21914    | <i>Kabuli</i>    | Ca_Kabuli_denovo             | 16848818                       | (C/G)       |
| 21915       | CakSNP21915    | <i>Kabuli</i>    | Ca_Kabuli_denovo             | 16849886                       | (C/A)       |
| 21916       | CakSNP21916    | <i>Kabuli</i>    | Ca_Kabuli_denovo             | 16849916                       | (G/C)       |
| 21917       | CakSNP21917    | <i>Kabuli</i>    | Ca_Kabuli_denovo             | 16854862                       | (C/T)       |
| 21918       | CakSNP21918    | <i>Kabuli</i>    | Ca_Kabuli_denovo             | 16854880                       | (A/G)       |
| 21919       | CakSNP21919    | <i>Kabuli</i>    | Ca_Kabuli_denovo             | 16856071                       | (T/C)       |
| 21920       | CakSNP21920    | <i>Kabuli</i>    | Ca_Kabuli_denovo             | 16857724                       | (G/T)       |
| 21921       | CakSNP21921    | <i>Kabuli</i>    | Ca_Kabuli_denovo             | 16866134                       | (C/T)       |
| 21922       | CakSNP21922    | <i>Kabuli</i>    | Ca_Kabuli_denovo             | 16866191                       | (T/G)       |
| 21923       | CakSNP21923    | <i>Kabuli</i>    | Ca_Kabuli_denovo             | 16867690                       | (G/A)       |
| 21924       | CakSNP21924    | <i>Kabuli</i>    | Ca_Kabuli_denovo             | 16884460                       | (G/C)       |
| 21925       | CakSNP21925    | <i>Kabuli</i>    | Ca_Kabuli_denovo             | 16890964                       | (T/C)       |

| <b>S.N.</b> | <b>SNP IDs</b> | <b>Cultivars</b> | <b>Chromosomes/scaffolds</b> | <b>Physical positions (bp)</b> | <b>SNPs</b> |
|-------------|----------------|------------------|------------------------------|--------------------------------|-------------|
| 21926       | CakSNP21926    | <i>Kabuli</i>    | Ca_Kabuli_denovo             | 16890974                       | (A/G)       |
| 21927       | CakSNP21927    | <i>Kabuli</i>    | Ca_Kabuli_denovo             | 16900104                       | (G/A)       |
| 21928       | CakSNP21928    | <i>Kabuli</i>    | Ca_Kabuli_denovo             | 16900127                       | (G/A)       |
| 21929       | CakSNP21929    | <i>Kabuli</i>    | Ca_Kabuli_denovo             | 16901597                       | (T/G)       |
| 21930       | CakSNP21930    | <i>Kabuli</i>    | Ca_Kabuli_denovo             | 16901600                       | (T/A)       |
| 21931       | CakSNP21931    | <i>Kabuli</i>    | Ca_Kabuli_denovo             | 16901701                       | (C/T)       |
| 21932       | CakSNP21932    | <i>Kabuli</i>    | Ca_Kabuli_denovo             | 16904740                       | (A/C)       |
| 21933       | CakSNP21933    | <i>Kabuli</i>    | Ca_Kabuli_denovo             | 16909393                       | (C/G)       |
| 21934       | CakSNP21934    | <i>Kabuli</i>    | Ca_Kabuli_denovo             | 16909447                       | (C/A)       |
| 21935       | CakSNP21935    | <i>Kabuli</i>    | Ca_Kabuli_denovo             | 16913920                       | (G/T)       |
| 21936       | CakSNP21936    | <i>Kabuli</i>    | Ca_Kabuli_denovo             | 16917202                       | (G/C)       |
| 21937       | CakSNP21937    | <i>Kabuli</i>    | Ca_Kabuli_denovo             | 16917212                       | (G/A)       |
| 21938       | CakSNP21938    | <i>Kabuli</i>    | Ca_Kabuli_denovo             | 16921376                       | (A/G)       |
| 21939       | CakSNP21939    | <i>Kabuli</i>    | Ca_Kabuli_denovo             | 16929094                       | (C/T)       |
| 21940       | CakSNP21940    | <i>Kabuli</i>    | Ca_Kabuli_denovo             | 16930382                       | (T/C)       |
| 21941       | CakSNP21941    | <i>Kabuli</i>    | Ca_Kabuli_denovo             | 16936177                       | (A/G)       |
| 21942       | CakSNP21942    | <i>Kabuli</i>    | Ca_Kabuli_denovo             | 16938854                       | (T/C)       |
| 21943       | CakSNP21943    | <i>Kabuli</i>    | Ca_Kabuli_denovo             | 16938863                       | (A/G)       |
| 21944       | CakSNP21944    | <i>Kabuli</i>    | Ca_Kabuli_denovo             | 16947610                       | (G/A)       |
| 21945       | CakSNP21945    | <i>Kabuli</i>    | Ca_Kabuli_denovo             | 16947664                       | (T/C)       |
| 21946       | CakSNP21946    | <i>Kabuli</i>    | Ca_Kabuli_denovo             | 16947792                       | (G/A)       |
| 21947       | CakSNP21947    | <i>Kabuli</i>    | Ca_Kabuli_denovo             | 16950010                       | (T/C)       |
| 21948       | CakSNP21948    | <i>Kabuli</i>    | Ca_Kabuli_denovo             | 16959044                       | (C/G)       |
| 21949       | CakSNP21949    | <i>Kabuli</i>    | Ca_Kabuli_denovo             | 16959070                       | (C/G)       |
| 21950       | CakSNP21950    | <i>Kabuli</i>    | Ca_Kabuli_denovo             | 16959077                       | (G/A)       |
| 21951       | CakSNP21951    | <i>Kabuli</i>    | Ca_Kabuli_denovo             | 16972762                       | (T/C)       |
| 21952       | CakSNP21952    | <i>Kabuli</i>    | Ca_Kabuli_denovo             | 16973548                       | (C/T)       |
| 21953       | CakSNP21953    | <i>Kabuli</i>    | Ca_Kabuli_denovo             | 16973590                       | (C/G)       |
| 21954       | CakSNP21954    | <i>Kabuli</i>    | Ca_Kabuli_denovo             | 16984599                       | (C/G)       |
| 21955       | CakSNP21955    | <i>Kabuli</i>    | Ca_Kabuli_denovo             | 16984785                       | (C/G)       |
| 21956       | CakSNP21956    | <i>Kabuli</i>    | Ca_Kabuli_denovo             | 16984812                       | (T/C)       |
| 21957       | CakSNP21957    | <i>Kabuli</i>    | Ca_Kabuli_denovo             | 17004468                       | (G/A)       |
| 21958       | CakSNP21958    | <i>Kabuli</i>    | Ca_Kabuli_denovo             | 17004504                       | (C/T)       |
| 21959       | CakSNP21959    | <i>Kabuli</i>    | Ca_Kabuli_denovo             | 17004540                       | (C/T)       |
| 21960       | CakSNP21960    | <i>Kabuli</i>    | Ca_Kabuli_denovo             | 17005753                       | (G/A)       |
| 21961       | CakSNP21961    | <i>Kabuli</i>    | Ca_Kabuli_denovo             | 17005756                       | (A/G)       |
| 21962       | CakSNP21962    | <i>Kabuli</i>    | Ca_Kabuli_denovo             | 17016529                       | (C/T)       |
| 21963       | CakSNP21963    | <i>Kabuli</i>    | Ca_Kabuli_denovo             | 17016536                       | (G/T)       |

| <b>S.N.</b> | <b>SNP IDs</b> | <b>Cultivars</b> | <b>Chromosomes/scaffolds</b> | <b>Physical positions (bp)</b> | <b>SNPs</b> |
|-------------|----------------|------------------|------------------------------|--------------------------------|-------------|
| 21964       | CakSNP21964    | <i>Kabuli</i>    | Ca_Kabuli_denovo             | 17016995                       | (A/T)       |
| 21965       | CakSNP21965    | <i>Kabuli</i>    | Ca_Kabuli_denovo             | 17021436                       | (T/G)       |
| 21966       | CakSNP21966    | <i>Kabuli</i>    | Ca_Kabuli_denovo             | 17021442                       | (G/T)       |
| 21967       | CakSNP21967    | <i>Kabuli</i>    | Ca_Kabuli_denovo             | 17024552                       | (C/A)       |
| 21968       | CakSNP21968    | <i>Kabuli</i>    | Ca_Kabuli_denovo             | 17034564                       | (T/C)       |
| 21969       | CakSNP21969    | <i>Kabuli</i>    | Ca_Kabuli_denovo             | 17034585                       | (G/A)       |
| 21970       | CakSNP21970    | <i>Kabuli</i>    | Ca_Kabuli_denovo             | 17035472                       | (G/A)       |
| 21971       | CakSNP21971    | <i>Kabuli</i>    | Ca_Kabuli_denovo             | 17039549                       | (C/G)       |
| 21972       | CakSNP21972    | <i>Kabuli</i>    | Ca_Kabuli_denovo             | 17039551                       | (T/G)       |
| 21973       | CakSNP21973    | <i>Kabuli</i>    | Ca_Kabuli_denovo             | 17042770                       | (C/G)       |
| 21974       | CakSNP21974    | <i>Kabuli</i>    | Ca_Kabuli_denovo             | 17043941                       | (G/A)       |
| 21975       | CakSNP21975    | <i>Kabuli</i>    | Ca_Kabuli_denovo             | 17045500                       | (T/G)       |
| 21976       | CakSNP21976    | <i>Kabuli</i>    | Ca_Kabuli_denovo             | 17050364                       | (G/A)       |
| 21977       | CakSNP21977    | <i>Kabuli</i>    | Ca_Kabuli_denovo             | 17052384                       | (T/G)       |
| 21978       | CakSNP21978    | <i>Kabuli</i>    | Ca_Kabuli_denovo             | 17056471                       | (C/T)       |
| 21979       | CakSNP21979    | <i>Kabuli</i>    | Ca_Kabuli_denovo             | 17056477                       | (C/G)       |
| 21980       | CakSNP21980    | <i>Kabuli</i>    | Ca_Kabuli_denovo             | 17057732                       | (C/T)       |
| 21981       | CakSNP21981    | <i>Kabuli</i>    | Ca_Kabuli_denovo             | 17057823                       | (T/C)       |
| 21982       | CakSNP21982    | <i>Kabuli</i>    | Ca_Kabuli_denovo             | 17057850                       | (G/A)       |
| 21983       | CakSNP21983    | <i>Kabuli</i>    | Ca_Kabuli_denovo             | 17069033                       | (A/C)       |
| 21984       | CakSNP21984    | <i>Kabuli</i>    | Ca_Kabuli_denovo             | 17069653                       | (C/T)       |
| 21985       | CakSNP21985    | <i>Kabuli</i>    | Ca_Kabuli_denovo             | 17069674                       | (T/C)       |
| 21986       | CakSNP21986    | <i>Kabuli</i>    | Ca_Kabuli_denovo             | 17072513                       | (T/C)       |
| 21987       | CakSNP21987    | <i>Kabuli</i>    | Ca_Kabuli_denovo             | 17072515                       | (G/C)       |
| 21988       | CakSNP21988    | <i>Kabuli</i>    | Ca_Kabuli_denovo             | 17072813                       | (T/C)       |
| 21989       | CakSNP21989    | <i>Kabuli</i>    | Ca_Kabuli_denovo             | 17074228                       | (A/G)       |
| 21990       | CakSNP21990    | <i>Kabuli</i>    | Ca_Kabuli_denovo             | 17074250                       | (T/A)       |
| 21991       | CakSNP21991    | <i>Kabuli</i>    | Ca_Kabuli_denovo             | 17074307                       | (A/T)       |
| 21992       | CakSNP21992    | <i>Kabuli</i>    | Ca_Kabuli_denovo             | 17077410                       | (A/G)       |
| 21993       | CakSNP21993    | <i>Kabuli</i>    | Ca_Kabuli_denovo             | 17082462                       | (T/C)       |
| 21994       | CakSNP21994    | <i>Kabuli</i>    | Ca_Kabuli_denovo             | 17082822                       | (A/G)       |
| 21995       | CakSNP21995    | <i>Kabuli</i>    | Ca_Kabuli_denovo             | 17083441                       | (G/T)       |
| 21996       | CakSNP21996    | <i>Kabuli</i>    | Ca_Kabuli_denovo             | 17085224                       | (T/C)       |
| 21997       | CakSNP21997    | <i>Kabuli</i>    | Ca_Kabuli_denovo             | 17094726                       | (G/A)       |
| 21998       | CakSNP21998    | <i>Kabuli</i>    | Ca_Kabuli_denovo             | 17095757                       | (A/G)       |
| 21999       | CakSNP21999    | <i>Kabuli</i>    | Ca_Kabuli_denovo             | 17100012                       | (C/G)       |
| 22000       | CakSNP22000    | <i>Kabuli</i>    | Ca_Kabuli_denovo             | 17100020                       | (A/C)       |
| 22001       | CakSNP22001    | <i>Kabuli</i>    | Ca_Kabuli_denovo             | 17100026                       | (C/G)       |

| <b>S.N.</b> | <b>SNP IDs</b> | <b>Cultivars</b> | <b>Chromosomes/scaffolds</b> | <b>Physical positions (bp)</b> | <b>SNPs</b> |
|-------------|----------------|------------------|------------------------------|--------------------------------|-------------|
| 22002       | CakSNP22002    | <i>Kabuli</i>    | Ca_Kabuli_denovo             | 17100254                       | (A/T)       |
| 22003       | CakSNP22003    | <i>Kabuli</i>    | Ca_Kabuli_denovo             | 17100270                       | (C/G)       |
| 22004       | CakSNP22004    | <i>Kabuli</i>    | Ca_Kabuli_denovo             | 17100331                       | (T/C)       |
| 22005       | CakSNP22005    | <i>Kabuli</i>    | Ca_Kabuli_denovo             | 17105131                       | (T/G)       |
| 22006       | CakSNP22006    | <i>Kabuli</i>    | Ca_Kabuli_denovo             | 17124123                       | (G/C)       |
| 22007       | CakSNP22007    | <i>Kabuli</i>    | Ca_Kabuli_denovo             | 17124179                       | (G/A)       |
| 22008       | CakSNP22008    | <i>Kabuli</i>    | Ca_Kabuli_denovo             | 17135908                       | (C/G)       |
| 22009       | CakSNP22009    | <i>Kabuli</i>    | Ca_Kabuli_denovo             | 17135911                       | (T/C)       |
| 22010       | CakSNP22010    | <i>Kabuli</i>    | Ca_Kabuli_denovo             | 17137643                       | (A/C)       |
| 22011       | CakSNP22011    | <i>Kabuli</i>    | Ca_Kabuli_denovo             | 17145502                       | (C/T)       |
| 22012       | CakSNP22012    | <i>Kabuli</i>    | Ca_Kabuli_denovo             | 17149807                       | (C/G)       |
| 22013       | CakSNP22013    | <i>Kabuli</i>    | Ca_Kabuli_denovo             | 17153306                       | (G/A)       |
| 22014       | CakSNP22014    | <i>Kabuli</i>    | Ca_Kabuli_denovo             | 17153538                       | (A/G)       |
| 22015       | CakSNP22015    | <i>Kabuli</i>    | Ca_Kabuli_denovo             | 17153539                       | (T/C)       |
| 22016       | CakSNP22016    | <i>Kabuli</i>    | Ca_Kabuli_denovo             | 17158844                       | (T/G)       |
| 22017       | CakSNP22017    | <i>Kabuli</i>    | Ca_Kabuli_denovo             | 17158845                       | (C/A)       |
| 22018       | CakSNP22018    | <i>Kabuli</i>    | Ca_Kabuli_denovo             | 17164315                       | (G/T)       |
| 22019       | CakSNP22019    | <i>Kabuli</i>    | Ca_Kabuli_denovo             | 17169559                       | (C/T)       |
| 22020       | CakSNP22020    | <i>Kabuli</i>    | Ca_Kabuli_denovo             | 17173889                       | (C/T)       |
| 22021       | CakSNP22021    | <i>Kabuli</i>    | Ca_Kabuli_denovo             | 17175017                       | (C/G)       |
| 22022       | CakSNP22022    | <i>Kabuli</i>    | Ca_Kabuli_denovo             | 17175032                       | (C/T)       |
| 22023       | CakSNP22023    | <i>Kabuli</i>    | Ca_Kabuli_denovo             | 17183208                       | (C/T)       |
| 22024       | CakSNP22024    | <i>Kabuli</i>    | Ca_Kabuli_denovo             | 17183478                       | (C/G)       |
| 22025       | CakSNP22025    | <i>Kabuli</i>    | Ca_Kabuli_denovo             | 17183481                       | (T/C)       |
| 22026       | CakSNP22026    | <i>Kabuli</i>    | Ca_Kabuli_denovo             | 17191143                       | (A/C)       |
| 22027       | CakSNP22027    | <i>Kabuli</i>    | Ca_Kabuli_denovo             | 17191144                       | (G/A)       |
| 22028       | CakSNP22028    | <i>Kabuli</i>    | Ca_Kabuli_denovo             | 17193826                       | (G/A)       |
| 22029       | CakSNP22029    | <i>Kabuli</i>    | Ca_Kabuli_denovo             | 17194069                       | (G/T)       |
| 22030       | CakSNP22030    | <i>Kabuli</i>    | Ca_Kabuli_denovo             | 17197111                       | (T/G)       |
| 22031       | CakSNP22031    | <i>Kabuli</i>    | Ca_Kabuli_denovo             | 17197112                       | (C/T)       |
| 22032       | CakSNP22032    | <i>Kabuli</i>    | Ca_Kabuli_denovo             | 17211956                       | (G/A)       |
| 22033       | CakSNP22033    | <i>Kabuli</i>    | Ca_Kabuli_denovo             | 17221166                       | (T/C)       |
| 22034       | CakSNP22034    | <i>Kabuli</i>    | Ca_Kabuli_denovo             | 17222126                       | (G/T)       |
| 22035       | CakSNP22035    | <i>Kabuli</i>    | Ca_Kabuli_denovo             | 17228590                       | (A/G)       |
| 22036       | CakSNP22036    | <i>Kabuli</i>    | Ca_Kabuli_denovo             | 17228617                       | (C/G)       |
| 22037       | CakSNP22037    | <i>Kabuli</i>    | Ca_Kabuli_denovo             | 17229757                       | (T/C)       |
| 22038       | CakSNP22038    | <i>Kabuli</i>    | Ca_Kabuli_denovo             | 17229851                       | (A/G)       |
| 22039       | CakSNP22039    | <i>Kabuli</i>    | Ca_Kabuli_denovo             | 17229856                       | (T/C)       |

| <b>S.N.</b> | <b>SNP IDs</b> | <b>Cultivars</b> | <b>Chromosomes/scaffolds</b> | <b>Physical positions (bp)</b> | <b>SNPs</b> |
|-------------|----------------|------------------|------------------------------|--------------------------------|-------------|
| 22040       | CakSNP22040    | <i>Kabuli</i>    | Ca_Kabuli_denovo             | 17230023                       | (C/T)       |
| 22041       | CakSNP22041    | <i>Kabuli</i>    | Ca_Kabuli_denovo             | 17232772                       | (G/A)       |
| 22042       | CakSNP22042    | <i>Kabuli</i>    | Ca_Kabuli_denovo             | 17234123                       | (C/T)       |
| 22043       | CakSNP22043    | <i>Kabuli</i>    | Ca_Kabuli_denovo             | 17234152                       | (T/G)       |
| 22044       | CakSNP22044    | <i>Kabuli</i>    | Ca_Kabuli_denovo             | 17234682                       | (G/A)       |
| 22045       | CakSNP22045    | <i>Kabuli</i>    | Ca_Kabuli_denovo             | 17234713                       | (C/A)       |
| 22046       | CakSNP22046    | <i>Kabuli</i>    | Ca_Kabuli_denovo             | 17236651                       | (C/T)       |
| 22047       | CakSNP22047    | <i>Kabuli</i>    | Ca_Kabuli_denovo             | 17236681                       | (T/C)       |
| 22048       | CakSNP22048    | <i>Kabuli</i>    | Ca_Kabuli_denovo             | 17237146                       | (A/G)       |
| 22049       | CakSNP22049    | <i>Kabuli</i>    | Ca_Kabuli_denovo             | 17259898                       | (C/G)       |
| 22050       | CakSNP22050    | <i>Kabuli</i>    | Ca_Kabuli_denovo             | 17263412                       | (T/G)       |
| 22051       | CakSNP22051    | <i>Kabuli</i>    | Ca_Kabuli_denovo             | 17264715                       | (G/C)       |
| 22052       | CakSNP22052    | <i>Kabuli</i>    | Ca_Kabuli_denovo             | 17264725                       | (T/C)       |
| 22053       | CakSNP22053    | <i>Kabuli</i>    | Ca_Kabuli_denovo             | 17264921                       | (G/A)       |
| 22054       | CakSNP22054    | <i>Kabuli</i>    | Ca_Kabuli_denovo             | 17265470                       | (A/G)       |
| 22055       | CakSNP22055    | <i>Kabuli</i>    | Ca_Kabuli_denovo             | 17270108                       | (G/A)       |
| 22056       | CakSNP22056    | <i>Kabuli</i>    | Ca_Kabuli_denovo             | 17275057                       | (G/A)       |
| 22057       | CakSNP22057    | <i>Kabuli</i>    | Ca_Kabuli_denovo             | 17275063                       | (A/G)       |
| 22058       | CakSNP22058    | <i>Kabuli</i>    | Ca_Kabuli_denovo             | 17284324                       | (A/G)       |
| 22059       | CakSNP22059    | <i>Kabuli</i>    | Ca_Kabuli_denovo             | 17286294                       | (C/T)       |
| 22060       | CakSNP22060    | <i>Kabuli</i>    | Ca_Kabuli_denovo             | 17286314                       | (A/G)       |
| 22061       | CakSNP22061    | <i>Kabuli</i>    | Ca_Kabuli_denovo             | 17288522                       | (C/T)       |
| 22062       | CakSNP22062    | <i>Kabuli</i>    | Ca_Kabuli_denovo             | 17288523                       | (T/C)       |
| 22063       | CakSNP22063    | <i>Kabuli</i>    | Ca_Kabuli_denovo             | 17289626                       | (T/G)       |
| 22064       | CakSNP22064    | <i>Kabuli</i>    | Ca_Kabuli_denovo             | 17290132                       | (C/T)       |
| 22065       | CakSNP22065    | <i>Kabuli</i>    | Ca_Kabuli_denovo             | 17291686                       | (A/C)       |
| 22066       | CakSNP22066    | <i>Kabuli</i>    | Ca_Kabuli_denovo             | 17297188                       | (C/T)       |
| 22067       | CakSNP22067    | <i>Kabuli</i>    | Ca_Kabuli_denovo             | 17297200                       | (G/A)       |
| 22068       | CakSNP22068    | <i>Kabuli</i>    | Ca_Kabuli_denovo             | 17309055                       | (A/G)       |
| 22069       | CakSNP22069    | <i>Kabuli</i>    | Ca_Kabuli_denovo             | 17310208                       | (T/C)       |
| 22070       | CakSNP22070    | <i>Kabuli</i>    | Ca_Kabuli_denovo             | 17313517                       | (C/A)       |
| 22071       | CakSNP22071    | <i>Kabuli</i>    | Ca_Kabuli_denovo             | 17313528                       | (A/C)       |
| 22072       | CakSNP22072    | <i>Kabuli</i>    | Ca_Kabuli_denovo             | 17313529                       | (G/C)       |
| 22073       | CakSNP22073    | <i>Kabuli</i>    | Ca_Kabuli_denovo             | 17317567                       | (C/T)       |
| 22074       | CakSNP22074    | <i>Kabuli</i>    | Ca_Kabuli_denovo             | 17318919                       | (T/G)       |
| 22075       | CakSNP22075    | <i>Kabuli</i>    | Ca_Kabuli_denovo             | 17319872                       | (C/T)       |
| 22076       | CakSNP22076    | <i>Kabuli</i>    | Ca_Kabuli_denovo             | 17321416                       | (C/A)       |
| 22077       | CakSNP22077    | <i>Kabuli</i>    | Ca_Kabuli_denovo             | 17330189                       | (T/C)       |

| <b>S.N.</b> | <b>SNP IDs</b> | <b>Cultivars</b> | <b>Chromosomes/scaffolds</b> | <b>Physical positions (bp)</b> | <b>SNPs</b> |
|-------------|----------------|------------------|------------------------------|--------------------------------|-------------|
| 22078       | CakSNP22078    | <i>Kabuli</i>    | Ca_Kabuli_denovo             | 17330572                       | (T/G)       |
| 22079       | CakSNP22079    | <i>Kabuli</i>    | Ca_Kabuli_denovo             | 17335969                       | (T/C)       |
| 22080       | CakSNP22080    | <i>Kabuli</i>    | Ca_Kabuli_denovo             | 17335978                       | (C/T)       |
| 22081       | CakSNP22081    | <i>Kabuli</i>    | Ca_Kabuli_denovo             | 17336333                       | (C/T)       |
| 22082       | CakSNP22082    | <i>Kabuli</i>    | Ca_Kabuli_denovo             | 17336409                       | (T/C)       |
| 22083       | CakSNP22083    | <i>Kabuli</i>    | Ca_Kabuli_denovo             | 17339624                       | (A/G)       |
| 22084       | CakSNP22084    | <i>Kabuli</i>    | Ca_Kabuli_denovo             | 17347047                       | (G/T)       |
| 22085       | CakSNP22085    | <i>Kabuli</i>    | Ca_Kabuli_denovo             | 17347065                       | (G/C)       |
| 22086       | CakSNP22086    | <i>Kabuli</i>    | Ca_Kabuli_denovo             | 17349179                       | (C/A)       |
| 22087       | CakSNP22087    | <i>Kabuli</i>    | Ca_Kabuli_denovo             | 17350379                       | (C/T)       |
| 22088       | CakSNP22088    | <i>Kabuli</i>    | Ca_Kabuli_denovo             | 17350403                       | (G/C)       |
| 22089       | CakSNP22089    | <i>Kabuli</i>    | Ca_Kabuli_denovo             | 17355331                       | (C/T)       |
| 22090       | CakSNP22090    | <i>Kabuli</i>    | Ca_Kabuli_denovo             | 17355343                       | (T/G)       |
| 22091       | CakSNP22091    | <i>Kabuli</i>    | Ca_Kabuli_denovo             | 17363326                       | (A/G)       |
| 22092       | CakSNP22092    | <i>Kabuli</i>    | Ca_Kabuli_denovo             | 17363362                       | (C/G)       |
| 22093       | CakSNP22093    | <i>Kabuli</i>    | Ca_Kabuli_denovo             | 17363588                       | (G/C)       |
| 22094       | CakSNP22094    | <i>Kabuli</i>    | Ca_Kabuli_denovo             | 17363607                       | (G/A)       |
| 22095       | CakSNP22095    | <i>Kabuli</i>    | Ca_Kabuli_denovo             | 17365595                       | (A/G)       |
| 22096       | CakSNP22096    | <i>Kabuli</i>    | Ca_Kabuli_denovo             | 17367130                       | (T/G)       |
| 22097       | CakSNP22097    | <i>Kabuli</i>    | Ca_Kabuli_denovo             | 17372448                       | (G/A)       |
| 22098       | CakSNP22098    | <i>Kabuli</i>    | Ca_Kabuli_denovo             | 17372474                       | (G/T)       |
| 22099       | CakSNP22099    | <i>Kabuli</i>    | Ca_Kabuli_denovo             | 17374148                       | (T/C)       |
| 22100       | CakSNP22100    | <i>Kabuli</i>    | Ca_Kabuli_denovo             | 17374150                       | (G/A)       |
| 22101       | CakSNP22101    | <i>Kabuli</i>    | Ca_Kabuli_denovo             | 17374982                       | (C/G)       |
| 22102       | CakSNP22102    | <i>Kabuli</i>    | Ca_Kabuli_denovo             | 17383714                       | (G/C)       |
| 22103       | CakSNP22103    | <i>Kabuli</i>    | Ca_Kabuli_denovo             | 17390158                       | (C/T)       |
| 22104       | CakSNP22104    | <i>Kabuli</i>    | Ca_Kabuli_denovo             | 17391946                       | (G/A)       |
| 22105       | CakSNP22105    | <i>Kabuli</i>    | Ca_Kabuli_denovo             | 17392021                       | (A/G)       |
| 22106       | CakSNP22106    | <i>Kabuli</i>    | Ca_Kabuli_denovo             | 17396458                       | (G/A)       |
| 22107       | CakSNP22107    | <i>Kabuli</i>    | Ca_Kabuli_denovo             | 17400281                       | (G/C)       |
| 22108       | CakSNP22108    | <i>Kabuli</i>    | Ca_Kabuli_denovo             | 17418177                       | (G/A)       |
| 22109       | CakSNP22109    | <i>Kabuli</i>    | Ca_Kabuli_denovo             | 17418195                       | (G/A)       |
| 22110       | CakSNP22110    | <i>Kabuli</i>    | Ca_Kabuli_denovo             | 17423923                       | (A/C)       |
| 22111       | CakSNP22111    | <i>Kabuli</i>    | Ca_Kabuli_denovo             | 17425180                       | (T/A)       |
| 22112       | CakSNP22112    | <i>Kabuli</i>    | Ca_Kabuli_denovo             | 17425534                       | (G/C)       |
| 22113       | CakSNP22113    | <i>Kabuli</i>    | Ca_Kabuli_denovo             | 17426379                       | (C/T)       |
| 22114       | CakSNP22114    | <i>Kabuli</i>    | Ca_Kabuli_denovo             | 17427763                       | (A/G)       |
| 22115       | CakSNP22115    | <i>Kabuli</i>    | Ca_Kabuli_denovo             | 17427807                       | (G/A)       |



| <b>S.N.</b> | <b>SNP IDs</b> | <b>Cultivars</b> | <b>Chromosomes/scaffolds</b> | <b>Physical positions (bp)</b> | <b>SNPs</b> |
|-------------|----------------|------------------|------------------------------|--------------------------------|-------------|
| 22116       | CakSNP22116    | <i>Kabuli</i>    | Ca_Kabuli_denovo             | 17429423                       | (A/G)       |
| 22117       | CakSNP22117    | <i>Kabuli</i>    | Ca_Kabuli_denovo             | 17429444                       | (G/A)       |
| 22118       | CakSNP22118    | <i>Kabuli</i>    | Ca_Kabuli_denovo             | 17432893                       | (G/A)       |
| 22119       | CakSNP22119    | <i>Kabuli</i>    | Ca_Kabuli_denovo             | 17438905                       | (A/G)       |
| 22120       | CakSNP22120    | <i>Kabuli</i>    | Ca_Kabuli_denovo             | 17454408                       | (G/A)       |
| 22121       | CakSNP22121    | <i>Kabuli</i>    | Ca_Kabuli_denovo             | 17454527                       | (C/G)       |
| 22122       | CakSNP22122    | <i>Kabuli</i>    | Ca_Kabuli_denovo             | 17454584                       | (G/A)       |
| 22123       | CakSNP22123    | <i>Kabuli</i>    | Ca_Kabuli_denovo             | 17458338                       | (C/G)       |
| 22124       | CakSNP22124    | <i>Kabuli</i>    | Ca_Kabuli_denovo             | 17458378                       | (A/C)       |
| 22125       | CakSNP22125    | <i>Kabuli</i>    | Ca_Kabuli_denovo             | 17460854                       | (C/A)       |
| 22126       | CakSNP22126    | <i>Kabuli</i>    | Ca_Kabuli_denovo             | 17462015                       | (T/C)       |
| 22127       | CakSNP22127    | <i>Kabuli</i>    | Ca_Kabuli_denovo             | 17462108                       | (G/T)       |
| 22128       | CakSNP22128    | <i>Kabuli</i>    | Ca_Kabuli_denovo             | 17463999                       | (T/G)       |
| 22129       | CakSNP22129    | <i>Kabuli</i>    | Ca_Kabuli_denovo             | 17464342                       | (A/G)       |
| 22130       | CakSNP22130    | <i>Kabuli</i>    | Ca_Kabuli_denovo             | 17465423                       | (C/T)       |
| 22131       | CakSNP22131    | <i>Kabuli</i>    | Ca_Kabuli_denovo             | 17465429                       | (A/G)       |
| 22132       | CakSNP22132    | <i>Kabuli</i>    | Ca_Kabuli_denovo             | 17467389                       | (A/G)       |
| 22133       | CakSNP22133    | <i>Kabuli</i>    | Ca_Kabuli_denovo             | 17468575                       | (A/T)       |
| 22134       | CakSNP22134    | <i>Kabuli</i>    | Ca_Kabuli_denovo             | 17472963                       | (C/A)       |
| 22135       | CakSNP22135    | <i>Kabuli</i>    | Ca_Kabuli_denovo             | 17475553                       | (A/G)       |
| 22136       | CakSNP22136    | <i>Kabuli</i>    | Ca_Kabuli_denovo             | 17475769                       | (A/C)       |
| 22137       | CakSNP22137    | <i>Kabuli</i>    | Ca_Kabuli_denovo             | 17484863                       | (A/G)       |
| 22138       | CakSNP22138    | <i>Kabuli</i>    | Ca_Kabuli_denovo             | 17484890                       | (C/A)       |
| 22139       | CakSNP22139    | <i>Kabuli</i>    | Ca_Kabuli_denovo             | 17490392                       | (G/A)       |
| 22140       | CakSNP22140    | <i>Kabuli</i>    | Ca_Kabuli_denovo             | 17491797                       | (C/T)       |
| 22141       | CakSNP22141    | <i>Kabuli</i>    | Ca_Kabuli_denovo             | 17494871                       | (A/T)       |
| 22142       | CakSNP22142    | <i>Kabuli</i>    | Ca_Kabuli_denovo             | 17495308                       | (T/C)       |
| 22143       | CakSNP22143    | <i>Kabuli</i>    | Ca_Kabuli_denovo             | 17495506                       | (A/T)       |
| 22144       | CakSNP22144    | <i>Kabuli</i>    | Ca_Kabuli_denovo             | 17495658                       | (A/G)       |
| 22145       | CakSNP22145    | <i>Kabuli</i>    | Ca_Kabuli_denovo             | 17495911                       | (C/A)       |
| 22146       | CakSNP22146    | <i>Kabuli</i>    | Ca_Kabuli_denovo             | 17495980                       | (C/G)       |
| 22147       | CakSNP22147    | <i>Kabuli</i>    | Ca_Kabuli_denovo             | 17496047                       | (A/G)       |
| 22148       | CakSNP22148    | <i>Kabuli</i>    | Ca_Kabuli_denovo             | 17496086                       | (C/T)       |
| 22149       | CakSNP22149    | <i>Kabuli</i>    | Ca_Kabuli_denovo             | 17498540                       | (G/C)       |
| 22150       | CakSNP22150    | <i>Kabuli</i>    | Ca_Kabuli_denovo             | 17502327                       | (C/G)       |
| 22151       | CakSNP22151    | <i>Kabuli</i>    | Ca_Kabuli_denovo             | 17502354                       | (C/T)       |
| 22152       | CakSNP22152    | <i>Kabuli</i>    | Ca_Kabuli_denovo             | 17509865                       | (C/G)       |
| 22153       | CakSNP22153    | <i>Kabuli</i>    | Ca_Kabuli_denovo             | 17509874                       | (G/T)       |

| <b>S.N.</b> | <b>SNP IDs</b> | <b>Cultivars</b> | <b>Chromosomes/scaffolds</b> | <b>Physical positions (bp)</b> | <b>SNPs</b> |
|-------------|----------------|------------------|------------------------------|--------------------------------|-------------|
| 22154       | CakSNP22154    | <i>Kabuli</i>    | Ca_Kabuli_denovo             | 17512372                       | (G/C)       |
| 22155       | CakSNP22155    | <i>Kabuli</i>    | Ca_Kabuli_denovo             | 17512443                       | (A/G)       |
| 22156       | CakSNP22156    | <i>Kabuli</i>    | Ca_Kabuli_denovo             | 17514272                       | (T/G)       |
| 22157       | CakSNP22157    | <i>Kabuli</i>    | Ca_Kabuli_denovo             | 17514319                       | (A/C)       |
| 22158       | CakSNP22158    | <i>Kabuli</i>    | Ca_Kabuli_denovo             | 17515725                       | (T/C)       |
| 22159       | CakSNP22159    | <i>Kabuli</i>    | Ca_Kabuli_denovo             | 17515728                       | (A/G)       |
| 22160       | CakSNP22160    | <i>Kabuli</i>    | Ca_Kabuli_denovo             | 17516278                       | (A/G)       |
| 22161       | CakSNP22161    | <i>Kabuli</i>    | Ca_Kabuli_denovo             | 17517744                       | (A/G)       |
| 22162       | CakSNP22162    | <i>Kabuli</i>    | Ca_Kabuli_denovo             | 17519081                       | (A/G)       |
| 22163       | CakSNP22163    | <i>Kabuli</i>    | Ca_Kabuli_denovo             | 17519153                       | (C/G)       |
| 22164       | CakSNP22164    | <i>Kabuli</i>    | Ca_Kabuli_denovo             | 17522335                       | (A/G)       |
| 22165       | CakSNP22165    | <i>Kabuli</i>    | Ca_Kabuli_denovo             | 17522341                       | (C/G)       |
| 22166       | CakSNP22166    | <i>Kabuli</i>    | Ca_Kabuli_denovo             | 17543443                       | (A/G)       |
| 22167       | CakSNP22167    | <i>Kabuli</i>    | Ca_Kabuli_denovo             | 17554118                       | (A/G)       |
| 22168       | CakSNP22168    | <i>Kabuli</i>    | Ca_Kabuli_denovo             | 17554879                       | (G/A)       |
| 22169       | CakSNP22169    | <i>Kabuli</i>    | Ca_Kabuli_denovo             | 17555105                       | (G/A)       |
| 22170       | CakSNP22170    | <i>Kabuli</i>    | Ca_Kabuli_denovo             | 17555680                       | (C/T)       |
| 22171       | CakSNP22171    | <i>Kabuli</i>    | Ca_Kabuli_denovo             | 17563276                       | (A/C)       |
| 22172       | CakSNP22172    | <i>Kabuli</i>    | Ca_Kabuli_denovo             | 17563281                       | (G/A)       |
| 22173       | CakSNP22173    | <i>Kabuli</i>    | Ca_Kabuli_denovo             | 17568185                       | (A/G)       |
| 22174       | CakSNP22174    | <i>Kabuli</i>    | Ca_Kabuli_denovo             | 17568195                       | (A/G)       |
| 22175       | CakSNP22175    | <i>Kabuli</i>    | Ca_Kabuli_denovo             | 17568481                       | (A/C)       |
| 22176       | CakSNP22176    | <i>Kabuli</i>    | Ca_Kabuli_denovo             | 17568536                       | (A/G)       |
| 22177       | CakSNP22177    | <i>Kabuli</i>    | Ca_Kabuli_denovo             | 17569512                       | (C/G)       |
| 22178       | CakSNP22178    | <i>Kabuli</i>    | Ca_Kabuli_denovo             | 17571190                       | (T/C)       |
| 22179       | CakSNP22179    | <i>Kabuli</i>    | Ca_Kabuli_denovo             | 17575857                       | (G/C)       |
| 22180       | CakSNP22180    | <i>Kabuli</i>    | Ca_Kabuli_denovo             | 17575861                       | (A/G)       |
| 22181       | CakSNP22181    | <i>Kabuli</i>    | Ca_Kabuli_denovo             | 17575862                       | (A/G)       |
| 22182       | CakSNP22182    | <i>Kabuli</i>    | Ca_Kabuli_denovo             | 17575990                       | (A/G)       |
| 22183       | CakSNP22183    | <i>Kabuli</i>    | Ca_Kabuli_denovo             | 17576348                       | (T/C)       |
| 22184       | CakSNP22184    | <i>Kabuli</i>    | Ca_Kabuli_denovo             | 17577311                       | (G/T)       |
| 22185       | CakSNP22185    | <i>Kabuli</i>    | Ca_Kabuli_denovo             | 17577949                       | (T/G)       |
| 22186       | CakSNP22186    | <i>Kabuli</i>    | Ca_Kabuli_denovo             | 17578019                       | (C/G)       |
| 22187       | CakSNP22187    | <i>Kabuli</i>    | Ca_Kabuli_denovo             | 17587745                       | (A/G)       |
| 22188       | CakSNP22188    | <i>Kabuli</i>    | Ca_Kabuli_denovo             | 17587759                       | (A/G)       |
| 22189       | CakSNP22189    | <i>Kabuli</i>    | Ca_Kabuli_denovo             | 17588013                       | (C/A)       |
| 22190       | CakSNP22190    | <i>Kabuli</i>    | Ca_Kabuli_denovo             | 17588037                       | (A/G)       |
| 22191       | CakSNP22191    | <i>Kabuli</i>    | Ca_Kabuli_denovo             | 17588065                       | (C/T)       |

| <b>S.N.</b> | <b>SNP IDs</b> | <b>Cultivars</b> | <b>Chromosomes/scaffolds</b> | <b>Physical positions (bp)</b> | <b>SNPs</b> |
|-------------|----------------|------------------|------------------------------|--------------------------------|-------------|
| 22192       | CakSNP22192    | <i>Kabuli</i>    | Ca_Kabuli_denovo             | 17589665                       | (C/T)       |
| 22193       | CakSNP22193    | <i>Kabuli</i>    | Ca_Kabuli_denovo             | 17589862                       | (C/G)       |
| 22194       | CakSNP22194    | <i>Kabuli</i>    | Ca_Kabuli_denovo             | 17593933                       | (G/A)       |
| 22195       | CakSNP22195    | <i>Kabuli</i>    | Ca_Kabuli_denovo             | 17593960                       | (A/G)       |
| 22196       | CakSNP22196    | <i>Kabuli</i>    | Ca_Kabuli_denovo             | 17605730                       | (G/A)       |
| 22197       | CakSNP22197    | <i>Kabuli</i>    | Ca_Kabuli_denovo             | 17609678                       | (G/C)       |
| 22198       | CakSNP22198    | <i>Kabuli</i>    | Ca_Kabuli_denovo             | 17609709                       | (A/G)       |
| 22199       | CakSNP22199    | <i>Kabuli</i>    | Ca_Kabuli_denovo             | 17610652                       | (A/G)       |
| 22200       | CakSNP22200    | <i>Kabuli</i>    | Ca_Kabuli_denovo             | 17610664                       | (G/C)       |
| 22201       | CakSNP22201    | <i>Kabuli</i>    | Ca_Kabuli_denovo             | 17610812                       | (G/A)       |
| 22202       | CakSNP22202    | <i>Kabuli</i>    | Ca_Kabuli_denovo             | 17610820                       | (C/T)       |
| 22203       | CakSNP22203    | <i>Kabuli</i>    | Ca_Kabuli_denovo             | 17611216                       | (C/T)       |
| 22204       | CakSNP22204    | <i>Kabuli</i>    | Ca_Kabuli_denovo             | 17611222                       | (A/G)       |
| 22205       | CakSNP22205    | <i>Kabuli</i>    | Ca_Kabuli_denovo             | 17621283                       | (C/T)       |
| 22206       | CakSNP22206    | <i>Kabuli</i>    | Ca_Kabuli_denovo             | 17621351                       | (T/C)       |
| 22207       | CakSNP22207    | <i>Kabuli</i>    | Ca_Kabuli_denovo             | 17625679                       | (A/G)       |
| 22208       | CakSNP22208    | <i>Kabuli</i>    | Ca_Kabuli_denovo             | 17626513                       | (T/G)       |
| 22209       | CakSNP22209    | <i>Kabuli</i>    | Ca_Kabuli_denovo             | 17627257                       | (C/T)       |
| 22210       | CakSNP22210    | <i>Kabuli</i>    | Ca_Kabuli_denovo             | 17634324                       | (G/T)       |
| 22211       | CakSNP22211    | <i>Kabuli</i>    | Ca_Kabuli_denovo             | 17634364                       | (G/A)       |
| 22212       | CakSNP22212    | <i>Kabuli</i>    | Ca_Kabuli_denovo             | 17643307                       | (G/A)       |
| 22213       | CakSNP22213    | <i>Kabuli</i>    | Ca_Kabuli_denovo             | 17645604                       | (A/G)       |
| 22214       | CakSNP22214    | <i>Kabuli</i>    | Ca_Kabuli_denovo             | 17648275                       | (C/T)       |
| 22215       | CakSNP22215    | <i>Kabuli</i>    | Ca_Kabuli_denovo             | 17651790                       | (C/T)       |
| 22216       | CakSNP22216    | <i>Kabuli</i>    | Ca_Kabuli_denovo             | 17651792                       | (G/C)       |
| 22217       | CakSNP22217    | <i>Kabuli</i>    | Ca_Kabuli_denovo             | 17653212                       | (C/A)       |
| 22218       | CakSNP22218    | <i>Kabuli</i>    | Ca_Kabuli_denovo             | 17653385                       | (A/G)       |
| 22219       | CakSNP22219    | <i>Kabuli</i>    | Ca_Kabuli_denovo             | 17653412                       | (T/C)       |
| 22220       | CakSNP22220    | <i>Kabuli</i>    | Ca_Kabuli_denovo             | 17655910                       | (G/A)       |
| 22221       | CakSNP22221    | <i>Kabuli</i>    | Ca_Kabuli_denovo             | 17659610                       | (C/T)       |
| 22222       | CakSNP22222    | <i>Kabuli</i>    | Ca_Kabuli_denovo             | 17660788                       | (G/T)       |
| 22223       | CakSNP22223    | <i>Kabuli</i>    | Ca_Kabuli_denovo             | 17664464                       | (G/A)       |
| 22224       | CakSNP22224    | <i>Kabuli</i>    | Ca_Kabuli_denovo             | 17664469                       | (C/T)       |
| 22225       | CakSNP22225    | <i>Kabuli</i>    | Ca_Kabuli_denovo             | 17667464                       | (A/C)       |
| 22226       | CakSNP22226    | <i>Kabuli</i>    | Ca_Kabuli_denovo             | 17667796                       | (C/G)       |
| 22227       | CakSNP22227    | <i>Kabuli</i>    | Ca_Kabuli_denovo             | 17667823                       | (A/G)       |
| 22228       | CakSNP22228    | <i>Kabuli</i>    | Ca_Kabuli_denovo             | 17668198                       | (T/C)       |
| 22229       | CakSNP22229    | <i>Kabuli</i>    | Ca_Kabuli_denovo             | 17675941                       | (C/T)       |

| <b>S.N.</b> | <b>SNP IDs</b> | <b>Cultivars</b> | <b>Chromosomes/scaffolds</b> | <b>Physical positions (bp)</b> | <b>SNPs</b> |
|-------------|----------------|------------------|------------------------------|--------------------------------|-------------|
| 22230       | CakSNP22230    | <i>Kabuli</i>    | Ca_Kabuli_denovo             | 17675953                       | (C/G)       |
| 22231       | CakSNP22231    | <i>Kabuli</i>    | Ca_Kabuli_denovo             | 17681320                       | (T/C)       |
| 22232       | CakSNP22232    | <i>Kabuli</i>    | Ca_Kabuli_denovo             | 17686750                       | (C/T)       |
| 22233       | CakSNP22233    | <i>Kabuli</i>    | Ca_Kabuli_denovo             | 17686802                       | (C/T)       |
| 22234       | CakSNP22234    | <i>Kabuli</i>    | Ca_Kabuli_denovo             | 17690386                       | (A/G)       |
| 22235       | CakSNP22235    | <i>Kabuli</i>    | Ca_Kabuli_denovo             | 17690457                       | (T/G)       |
| 22236       | CakSNP22236    | <i>Kabuli</i>    | Ca_Kabuli_denovo             | 17695830                       | (T/C)       |
| 22237       | CakSNP22237    | <i>Kabuli</i>    | Ca_Kabuli_denovo             | 17696236                       | (A/G)       |
| 22238       | CakSNP22238    | <i>Kabuli</i>    | Ca_Kabuli_denovo             | 17703446                       | (C/T)       |
| 22239       | CakSNP22239    | <i>Kabuli</i>    | Ca_Kabuli_denovo             | 17707089                       | (T/G)       |
| 22240       | CakSNP22240    | <i>Kabuli</i>    | Ca_Kabuli_denovo             | 17714825                       | (A/C)       |
| 22241       | CakSNP22241    | <i>Kabuli</i>    | Ca_Kabuli_denovo             | 17719103                       | (A/C)       |
| 22242       | CakSNP22242    | <i>Kabuli</i>    | Ca_Kabuli_denovo             | 17729630                       | (G/A)       |
| 22243       | CakSNP22243    | <i>Kabuli</i>    | Ca_Kabuli_denovo             | 17729707                       | (G/T)       |
| 22244       | CakSNP22244    | <i>Kabuli</i>    | Ca_Kabuli_denovo             | 17730593                       | (G/C)       |
| 22245       | CakSNP22245    | <i>Kabuli</i>    | Ca_Kabuli_denovo             | 17730605                       | (A/C)       |
| 22246       | CakSNP22246    | <i>Kabuli</i>    | Ca_Kabuli_denovo             | 17730836                       | (A/C)       |
| 22247       | CakSNP22247    | <i>Kabuli</i>    | Ca_Kabuli_denovo             | 17737454                       | (G/A)       |
| 22248       | CakSNP22248    | <i>Kabuli</i>    | Ca_Kabuli_denovo             | 17737466                       | (A/G)       |
| 22249       | CakSNP22249    | <i>Kabuli</i>    | Ca_Kabuli_denovo             | 17741720                       | (G/C)       |
| 22250       | CakSNP22250    | <i>Kabuli</i>    | Ca_Kabuli_denovo             | 17743579                       | (C/T)       |
| 22251       | CakSNP22251    | <i>Kabuli</i>    | Ca_Kabuli_denovo             | 17745440                       | (T/C)       |
| 22252       | CakSNP22252    | <i>Kabuli</i>    | Ca_Kabuli_denovo             | 17745478                       | (C/T)       |
| 22253       | CakSNP22253    | <i>Kabuli</i>    | Ca_Kabuli_denovo             | 17746537                       | (T/G)       |
| 22254       | CakSNP22254    | <i>Kabuli</i>    | Ca_Kabuli_denovo             | 17749390                       | (C/G)       |
| 22255       | CakSNP22255    | <i>Kabuli</i>    | Ca_Kabuli_denovo             | 17749399                       | (T/C)       |
| 22256       | CakSNP22256    | <i>Kabuli</i>    | Ca_Kabuli_denovo             | 17753739                       | (T/A)       |
| 22257       | CakSNP22257    | <i>Kabuli</i>    | Ca_Kabuli_denovo             | 17760588                       | (A/G)       |
| 22258       | CakSNP22258    | <i>Kabuli</i>    | Ca_Kabuli_denovo             | 17760620                       | (C/T)       |
| 22259       | CakSNP22259    | <i>Kabuli</i>    | Ca_Kabuli_denovo             | 17760650                       | (T/G)       |
| 22260       | CakSNP22260    | <i>Kabuli</i>    | Ca_Kabuli_denovo             | 17761956                       | (G/A)       |
| 22261       | CakSNP22261    | <i>Kabuli</i>    | Ca_Kabuli_denovo             | 17765524                       | (G/T)       |
| 22262       | CakSNP22262    | <i>Kabuli</i>    | Ca_Kabuli_denovo             | 17765543                       | (G/C)       |
| 22263       | CakSNP22263    | <i>Kabuli</i>    | Ca_Kabuli_denovo             | 17781649                       | (G/C)       |
| 22264       | CakSNP22264    | <i>Kabuli</i>    | Ca_Kabuli_denovo             | 17785598                       | (G/C)       |
| 22265       | CakSNP22265    | <i>Kabuli</i>    | Ca_Kabuli_denovo             | 17785614                       | (T/G)       |
| 22266       | CakSNP22266    | <i>Kabuli</i>    | Ca_Kabuli_denovo             | 17785643                       | (T/C)       |
| 22267       | CakSNP22267    | <i>Kabuli</i>    | Ca_Kabuli_denovo             | 17787071                       | (A/G)       |

| <b>S.N.</b> | <b>SNP IDs</b> | <b>Cultivars</b> | <b>Chromosomes/scaffolds</b> | <b>Physical positions (bp)</b> | <b>SNPs</b> |
|-------------|----------------|------------------|------------------------------|--------------------------------|-------------|
| 22268       | CakSNP22268    | <i>Kabuli</i>    | Ca_Kabuli_denovo             | 17790731                       | (G/A)       |
| 22269       | CakSNP22269    | <i>Kabuli</i>    | Ca_Kabuli_denovo             | 17792770                       | (C/T)       |
| 22270       | CakSNP22270    | <i>Kabuli</i>    | Ca_Kabuli_denovo             | 17792777                       | (G/A)       |
| 22271       | CakSNP22271    | <i>Kabuli</i>    | Ca_Kabuli_denovo             | 17792957                       | (C/T)       |
| 22272       | CakSNP22272    | <i>Kabuli</i>    | Ca_Kabuli_denovo             | 17792964                       | (G/A)       |
| 22273       | CakSNP22273    | <i>Kabuli</i>    | Ca_Kabuli_denovo             | 17809880                       | (T/C)       |
| 22274       | CakSNP22274    | <i>Kabuli</i>    | Ca_Kabuli_denovo             | 17809913                       | (G/A)       |
| 22275       | CakSNP22275    | <i>Kabuli</i>    | Ca_Kabuli_denovo             | 17813020                       | (G/A)       |
| 22276       | CakSNP22276    | <i>Kabuli</i>    | Ca_Kabuli_denovo             | 17813023                       | (C/G)       |
| 22277       | CakSNP22277    | <i>Kabuli</i>    | Ca_Kabuli_denovo             | 17814716                       | (C/T)       |
| 22278       | CakSNP22278    | <i>Kabuli</i>    | Ca_Kabuli_denovo             | 17814788                       | (C/G)       |
| 22279       | CakSNP22279    | <i>Kabuli</i>    | Ca_Kabuli_denovo             | 17818318                       | (C/A)       |
| 22280       | CakSNP22280    | <i>Kabuli</i>    | Ca_Kabuli_denovo             | 17830073                       | (C/T)       |
| 22281       | CakSNP22281    | <i>Kabuli</i>    | Ca_Kabuli_denovo             | 17831657                       | (A/G)       |
| 22282       | CakSNP22282    | <i>Kabuli</i>    | Ca_Kabuli_denovo             | 17831663                       | (G/T)       |
| 22283       | CakSNP22283    | <i>Kabuli</i>    | Ca_Kabuli_denovo             | 17832301                       | (G/A)       |
| 22284       | CakSNP22284    | <i>Kabuli</i>    | Ca_Kabuli_denovo             | 17832314                       | (G/A)       |
| 22285       | CakSNP22285    | <i>Kabuli</i>    | Ca_Kabuli_denovo             | 17837354                       | (T/C)       |
| 22286       | CakSNP22286    | <i>Kabuli</i>    | Ca_Kabuli_denovo             | 17838454                       | (G/A)       |
| 22287       | CakSNP22287    | <i>Kabuli</i>    | Ca_Kabuli_denovo             | 17844685                       | (A/C)       |
| 22288       | CakSNP22288    | <i>Kabuli</i>    | Ca_Kabuli_denovo             | 17844706                       | (T/C)       |
| 22289       | CakSNP22289    | <i>Kabuli</i>    | Ca_Kabuli_denovo             | 17846171                       | (C/T)       |
| 22290       | CakSNP22290    | <i>Kabuli</i>    | Ca_Kabuli_denovo             | 17846249                       | (A/G)       |
| 22291       | CakSNP22291    | <i>Kabuli</i>    | Ca_Kabuli_denovo             | 17846303                       | (C/T)       |
| 22292       | CakSNP22292    | <i>Kabuli</i>    | Ca_Kabuli_denovo             | 17848306                       | (T/C)       |
| 22293       | CakSNP22293    | <i>Kabuli</i>    | Ca_Kabuli_denovo             | 17852659                       | (G/A)       |
| 22294       | CakSNP22294    | <i>Kabuli</i>    | Ca_Kabuli_denovo             | 17863496                       | (T/C)       |
| 22295       | CakSNP22295    | <i>Kabuli</i>    | Ca_Kabuli_denovo             | 17863520                       | (G/C)       |
| 22296       | CakSNP22296    | <i>Kabuli</i>    | Ca_Kabuli_denovo             | 17864834                       | (C/G)       |
| 22297       | CakSNP22297    | <i>Kabuli</i>    | Ca_Kabuli_denovo             | 17865968                       | (T/C)       |
| 22298       | CakSNP22298    | <i>Kabuli</i>    | Ca_Kabuli_denovo             | 17866529                       | (C/G)       |
| 22299       | CakSNP22299    | <i>Kabuli</i>    | Ca_Kabuli_denovo             | 17870735                       | (G/A)       |
| 22300       | CakSNP22300    | <i>Kabuli</i>    | Ca_Kabuli_denovo             | 17870747                       | (A/G)       |
| 22301       | CakSNP22301    | <i>Kabuli</i>    | Ca_Kabuli_denovo             | 17871285                       | (G/A)       |
| 22302       | CakSNP22302    | <i>Kabuli</i>    | Ca_Kabuli_denovo             | 17871294                       | (C/T)       |
| 22303       | CakSNP22303    | <i>Kabuli</i>    | Ca_Kabuli_denovo             | 17872306                       | (A/C)       |
| 22304       | CakSNP22304    | <i>Kabuli</i>    | Ca_Kabuli_denovo             | 17872945                       | (A/T)       |
| 22305       | CakSNP22305    | <i>Kabuli</i>    | Ca_Kabuli_denovo             | 17872976                       | (A/G)       |

| <b>S.N.</b> | <b>SNP IDs</b> | <b>Cultivars</b> | <b>Chromosomes/scaffolds</b> | <b>Physical positions (bp)</b> | <b>SNPs</b> |
|-------------|----------------|------------------|------------------------------|--------------------------------|-------------|
| 22306       | CakSNP22306    | <i>Kabuli</i>    | Ca_Kabuli_denovo             | 17884474                       | (T/G)       |
| 22307       | CakSNP22307    | <i>Kabuli</i>    | Ca_Kabuli_denovo             | 17889232                       | (G/C)       |
| 22308       | CakSNP22308    | <i>Kabuli</i>    | Ca_Kabuli_denovo             | 17889257                       | (A/G)       |
| 22309       | CakSNP22309    | <i>Kabuli</i>    | Ca_Kabuli_denovo             | 17891779                       | (T/C)       |
| 22310       | CakSNP22310    | <i>Kabuli</i>    | Ca_Kabuli_denovo             | 17892202                       | (T/C)       |
| 22311       | CakSNP22311    | <i>Kabuli</i>    | Ca_Kabuli_denovo             | 17901128                       | (C/T)       |
| 22312       | CakSNP22312    | <i>Kabuli</i>    | Ca_Kabuli_denovo             | 17901641                       | (A/G)       |
| 22313       | CakSNP22313    | <i>Kabuli</i>    | Ca_Kabuli_denovo             | 17901648                       | (T/A)       |
| 22314       | CakSNP22314    | <i>Kabuli</i>    | Ca_Kabuli_denovo             | 17910343                       | (A/G)       |
| 22315       | CakSNP22315    | <i>Kabuli</i>    | Ca_Kabuli_denovo             | 17910397                       | (A/C)       |
| 22316       | CakSNP22316    | <i>Kabuli</i>    | Ca_Kabuli_denovo             | 17913667                       | (A/G)       |
| 22317       | CakSNP22317    | <i>Kabuli</i>    | Ca_Kabuli_denovo             | 17913745                       | (T/C)       |
| 22318       | CakSNP22318    | <i>Kabuli</i>    | Ca_Kabuli_denovo             | 17919055                       | (A/C)       |
| 22319       | CakSNP22319    | <i>Kabuli</i>    | Ca_Kabuli_denovo             | 17925237                       | (G/A)       |
| 22320       | CakSNP22320    | <i>Kabuli</i>    | Ca_Kabuli_denovo             | 17925240                       | (T/G)       |
| 22321       | CakSNP22321    | <i>Kabuli</i>    | Ca_Kabuli_denovo             | 17928555                       | (G/T)       |
| 22322       | CakSNP22322    | <i>Kabuli</i>    | Ca_Kabuli_denovo             | 17928573                       | (C/G)       |
| 22323       | CakSNP22323    | <i>Kabuli</i>    | Ca_Kabuli_denovo             | 17932364                       | (C/T)       |
| 22324       | CakSNP22324    | <i>Kabuli</i>    | Ca_Kabuli_denovo             | 17935615                       | (C/A)       |
| 22325       | CakSNP22325    | <i>Kabuli</i>    | Ca_Kabuli_denovo             | 17935649                       | (T/G)       |
| 22326       | CakSNP22326    | <i>Kabuli</i>    | Ca_Kabuli_denovo             | 17935692                       | (C/T)       |
| 22327       | CakSNP22327    | <i>Kabuli</i>    | Ca_Kabuli_denovo             | 17935701                       | (A/G)       |
| 22328       | CakSNP22328    | <i>Kabuli</i>    | Ca_Kabuli_denovo             | 17942231                       | (A/G)       |
| 22329       | CakSNP22329    | <i>Kabuli</i>    | Ca_Kabuli_denovo             | 17949666                       | (A/G)       |
| 22330       | CakSNP22330    | <i>Kabuli</i>    | Ca_Kabuli_denovo             | 17950774                       | (A/G)       |
| 22331       | CakSNP22331    | <i>Kabuli</i>    | Ca_Kabuli_denovo             | 17957321                       | (C/A)       |
| 22332       | CakSNP22332    | <i>Kabuli</i>    | Ca_Kabuli_denovo             | 17957334                       | (C/G)       |
| 22333       | CakSNP22333    | <i>Kabuli</i>    | Ca_Kabuli_denovo             | 17963997                       | (T/G)       |
| 22334       | CakSNP22334    | <i>Kabuli</i>    | Ca_Kabuli_denovo             | 17968728                       | (G/A)       |
| 22335       | CakSNP22335    | <i>Kabuli</i>    | Ca_Kabuli_denovo             | 17969758                       | (G/C)       |
| 22336       | CakSNP22336    | <i>Kabuli</i>    | Ca_Kabuli_denovo             | 17971133                       | (G/C)       |
| 22337       | CakSNP22337    | <i>Kabuli</i>    | Ca_Kabuli_denovo             | 17971802                       | (G/T)       |
| 22338       | CakSNP22338    | <i>Kabuli</i>    | Ca_Kabuli_denovo             | 17971807                       | (G/C)       |
| 22339       | CakSNP22339    | <i>Kabuli</i>    | Ca_Kabuli_denovo             | 17972205                       | (A/G)       |
| 22340       | CakSNP22340    | <i>Kabuli</i>    | Ca_Kabuli_denovo             | 17974116                       | (G/A)       |
| 22341       | CakSNP22341    | <i>Kabuli</i>    | Ca_Kabuli_denovo             | 17974129                       | (C/T)       |
| 22342       | CakSNP22342    | <i>Kabuli</i>    | Ca_Kabuli_denovo             | 17985164                       | (C/T)       |
| 22343       | CakSNP22343    | <i>Kabuli</i>    | Ca_Kabuli_denovo             | 17986886                       | (T/A)       |

| <b>S.N.</b> | <b>SNP IDs</b> | <b>Cultivars</b> | <b>Chromosomes/scaffolds</b> | <b>Physical positions (bp)</b> | <b>SNPs</b> |
|-------------|----------------|------------------|------------------------------|--------------------------------|-------------|
| 22344       | CakSNP22344    | <i>Kabuli</i>    | Ca_Kabuli_denovo             | 17991233                       | (C/G)       |
| 22345       | CakSNP22345    | <i>Kabuli</i>    | Ca_Kabuli_denovo             | 17991279                       | (G/T)       |
| 22346       | CakSNP22346    | <i>Kabuli</i>    | Ca_Kabuli_denovo             | 17999993                       | (A/G)       |
| 22347       | CakSNP22347    | <i>Kabuli</i>    | Ca_Kabuli_denovo             | 18000376                       | (T/C)       |
| 22348       | CakSNP22348    | <i>Kabuli</i>    | Ca_Kabuli_denovo             | 18009494                       | (G/A)       |
| 22349       | CakSNP22349    | <i>Kabuli</i>    | Ca_Kabuli_denovo             | 18009530                       | (G/A)       |
| 22350       | CakSNP22350    | <i>Kabuli</i>    | Ca_Kabuli_denovo             | 18015260                       | (C/T)       |
| 22351       | CakSNP22351    | <i>Kabuli</i>    | Ca_Kabuli_denovo             | 18015266                       | (T/C)       |
| 22352       | CakSNP22352    | <i>Kabuli</i>    | Ca_Kabuli_denovo             | 18019036                       | (G/T)       |
| 22353       | CakSNP22353    | <i>Kabuli</i>    | Ca_Kabuli_denovo             | 18019054                       | (G/C)       |
| 22354       | CakSNP22354    | <i>Kabuli</i>    | Ca_Kabuli_denovo             | 18021175                       | (A/C)       |
| 22355       | CakSNP22355    | <i>Kabuli</i>    | Ca_Kabuli_denovo             | 18021208                       | (C/T)       |
| 22356       | CakSNP22356    | <i>Kabuli</i>    | Ca_Kabuli_denovo             | 18022504                       | (A/G)       |
| 22357       | CakSNP22357    | <i>Kabuli</i>    | Ca_Kabuli_denovo             | 18030218                       | (A/G)       |
| 22358       | CakSNP22358    | <i>Kabuli</i>    | Ca_Kabuli_denovo             | 18030245                       | (G/C)       |
| 22359       | CakSNP22359    | <i>Kabuli</i>    | Ca_Kabuli_denovo             | 18045236                       | (A/G)       |
| 22360       | CakSNP22360    | <i>Kabuli</i>    | Ca_Kabuli_denovo             | 18045254                       | (G/C)       |
| 22361       | CakSNP22361    | <i>Kabuli</i>    | Ca_Kabuli_denovo             | 18049288                       | (A/G)       |
| 22362       | CakSNP22362    | <i>Kabuli</i>    | Ca_Kabuli_denovo             | 18057460                       | (A/G)       |
| 22363       | CakSNP22363    | <i>Kabuli</i>    | Ca_Kabuli_denovo             | 18057493                       | (A/G)       |
| 22364       | CakSNP22364    | <i>Kabuli</i>    | Ca_Kabuli_denovo             | 18062095                       | (T/C)       |
| 22365       | CakSNP22365    | <i>Kabuli</i>    | Ca_Kabuli_denovo             | 18062116                       | (C/T)       |
| 22366       | CakSNP22366    | <i>Kabuli</i>    | Ca_Kabuli_denovo             | 18063677                       | (T/G)       |
| 22367       | CakSNP22367    | <i>Kabuli</i>    | Ca_Kabuli_denovo             | 18065873                       | (T/G)       |
| 22368       | CakSNP22368    | <i>Kabuli</i>    | Ca_Kabuli_denovo             | 18073526                       | (A/C)       |
| 22369       | CakSNP22369    | <i>Kabuli</i>    | Ca_Kabuli_denovo             | 18073553                       | (C/T)       |
| 22370       | CakSNP22370    | <i>Kabuli</i>    | Ca_Kabuli_denovo             | 18075293                       | (G/C)       |
| 22371       | CakSNP22371    | <i>Kabuli</i>    | Ca_Kabuli_denovo             | 18078197                       | (G/A)       |
| 22372       | CakSNP22372    | <i>Kabuli</i>    | Ca_Kabuli_denovo             | 18078269                       | (C/T)       |
| 22373       | CakSNP22373    | <i>Kabuli</i>    | Ca_Kabuli_denovo             | 18085071                       | (C/T)       |
| 22374       | CakSNP22374    | <i>Kabuli</i>    | Ca_Kabuli_denovo             | 18086849                       | (A/C)       |
| 22375       | CakSNP22375    | <i>Kabuli</i>    | Ca_Kabuli_denovo             | 18095969                       | (C/T)       |
| 22376       | CakSNP22376    | <i>Kabuli</i>    | Ca_Kabuli_denovo             | 18096648                       | (T/C)       |
| 22377       | CakSNP22377    | <i>Kabuli</i>    | Ca_Kabuli_denovo             | 18100045                       | (T/C)       |
| 22378       | CakSNP22378    | <i>Kabuli</i>    | Ca_Kabuli_denovo             | 18100062                       | (G/C)       |
| 22379       | CakSNP22379    | <i>Kabuli</i>    | Ca_Kabuli_denovo             | 18109396                       | (C/A)       |
| 22380       | CakSNP22380    | <i>Kabuli</i>    | Ca_Kabuli_denovo             | 18109402                       | (T/C)       |
| 22381       | CakSNP22381    | <i>Kabuli</i>    | Ca_Kabuli_denovo             | 18111873                       | (G/A)       |

| <b>S.N.</b> | <b>SNP IDs</b> | <b>Cultivars</b> | <b>Chromosomes/scaffolds</b> | <b>Physical positions (bp)</b> | <b>SNPs</b> |
|-------------|----------------|------------------|------------------------------|--------------------------------|-------------|
| 22382       | CakSNP22382    | <i>Kabuli</i>    | Ca_Kabuli_denovo             | 18111898                       | (C/T)       |
| 22383       | CakSNP22383    | <i>Kabuli</i>    | Ca_Kabuli_denovo             | 18113153                       | (C/A)       |
| 22384       | CakSNP22384    | <i>Kabuli</i>    | Ca_Kabuli_denovo             | 18113171                       | (G/A)       |
| 22385       | CakSNP22385    | <i>Kabuli</i>    | Ca_Kabuli_denovo             | 18113367                       | (C/A)       |
| 22386       | CakSNP22386    | <i>Kabuli</i>    | Ca_Kabuli_denovo             | 18113809                       | (G/A)       |
| 22387       | CakSNP22387    | <i>Kabuli</i>    | Ca_Kabuli_denovo             | 18115789                       | (T/A)       |
| 22388       | CakSNP22388    | <i>Kabuli</i>    | Ca_Kabuli_denovo             | 18115810                       | (G/C)       |
| 22389       | CakSNP22389    | <i>Kabuli</i>    | Ca_Kabuli_denovo             | 18116597                       | (T/C)       |
| 22390       | CakSNP22390    | <i>Kabuli</i>    | Ca_Kabuli_denovo             | 18116666                       | (A/T)       |
| 22391       | CakSNP22391    | <i>Kabuli</i>    | Ca_Kabuli_denovo             | 18118195                       | (T/G)       |
| 22392       | CakSNP22392    | <i>Kabuli</i>    | Ca_Kabuli_denovo             | 18120678                       | (A/C)       |
| 22393       | CakSNP22393    | <i>Kabuli</i>    | Ca_Kabuli_denovo             | 18126053                       | (T/C)       |
| 22394       | CakSNP22394    | <i>Kabuli</i>    | Ca_Kabuli_denovo             | 18127484                       | (G/C)       |
| 22395       | CakSNP22395    | <i>Kabuli</i>    | Ca_Kabuli_denovo             | 18130665                       | (G/A)       |
| 22396       | CakSNP22396    | <i>Kabuli</i>    | Ca_Kabuli_denovo             | 18131139                       | (C/A)       |
| 22397       | CakSNP22397    | <i>Kabuli</i>    | Ca_Kabuli_denovo             | 18131168                       | (G/A)       |
| 22398       | CakSNP22398    | <i>Kabuli</i>    | Ca_Kabuli_denovo             | 18132154                       | (A/G)       |
| 22399       | CakSNP22399    | <i>Kabuli</i>    | Ca_Kabuli_denovo             | 18136870                       | (T/G)       |
| 22400       | CakSNP22400    | <i>Kabuli</i>    | Ca_Kabuli_denovo             | 18136875                       | (G/C)       |
| 22401       | CakSNP22401    | <i>Kabuli</i>    | Ca_Kabuli_denovo             | 18143261                       | (C/T)       |
| 22402       | CakSNP22402    | <i>Kabuli</i>    | Ca_Kabuli_denovo             | 18145646                       | (T/C)       |
| 22403       | CakSNP22403    | <i>Kabuli</i>    | Ca_Kabuli_denovo             | 18145676                       | (C/T)       |
| 22404       | CakSNP22404    | <i>Kabuli</i>    | Ca_Kabuli_denovo             | 18150116                       | (A/G)       |
| 22405       | CakSNP22405    | <i>Kabuli</i>    | Ca_Kabuli_denovo             | 18150140                       | (G/T)       |
| 22406       | CakSNP22406    | <i>Kabuli</i>    | Ca_Kabuli_denovo             | 18152696                       | (G/C)       |
| 22407       | CakSNP22407    | <i>Kabuli</i>    | Ca_Kabuli_denovo             | 18155798                       | (A/G)       |
| 22408       | CakSNP22408    | <i>Kabuli</i>    | Ca_Kabuli_denovo             | 18155801                       | (A/G)       |
| 22409       | CakSNP22409    | <i>Kabuli</i>    | Ca_Kabuli_denovo             | 18157850                       | (A/C)       |
| 22410       | CakSNP22410    | <i>Kabuli</i>    | Ca_Kabuli_denovo             | 18159030                       | (C/T)       |
| 22411       | CakSNP22411    | <i>Kabuli</i>    | Ca_Kabuli_denovo             | 18161129                       | (C/G)       |
| 22412       | CakSNP22412    | <i>Kabuli</i>    | Ca_Kabuli_denovo             | 18164824                       | (T/A)       |
| 22413       | CakSNP22413    | <i>Kabuli</i>    | Ca_Kabuli_denovo             | 18166118                       | (G/C)       |
| 22414       | CakSNP22414    | <i>Kabuli</i>    | Ca_Kabuli_denovo             | 18166365                       | (T/C)       |
| 22415       | CakSNP22415    | <i>Kabuli</i>    | Ca_Kabuli_denovo             | 18166405                       | (G/A)       |
| 22416       | CakSNP22416    | <i>Kabuli</i>    | Ca_Kabuli_denovo             | 18167705                       | (A/T)       |
| 22417       | CakSNP22417    | <i>Kabuli</i>    | Ca_Kabuli_denovo             | 18169954                       | (C/T)       |
| 22418       | CakSNP22418    | <i>Kabuli</i>    | Ca_Kabuli_denovo             | 18170385                       | (A/G)       |
| 22419       | CakSNP22419    | <i>Kabuli</i>    | Ca_Kabuli_denovo             | 18173531                       | (C/T)       |



| <b>S.N.</b> | <b>SNP IDs</b> | <b>Cultivars</b> | <b>Chromosomes/scaffolds</b> | <b>Physical positions (bp)</b> | <b>SNPs</b> |
|-------------|----------------|------------------|------------------------------|--------------------------------|-------------|
| 22420       | CakSNP22420    | <i>Kabuli</i>    | Ca_Kabuli_denovo             | 18178644                       | (G/T)       |
| 22421       | CakSNP22421    | <i>Kabuli</i>    | Ca_Kabuli_denovo             | 18178846                       | (C/T)       |
| 22422       | CakSNP22422    | <i>Kabuli</i>    | Ca_Kabuli_denovo             | 18183712                       | (T/G)       |
| 22423       | CakSNP22423    | <i>Kabuli</i>    | Ca_Kabuli_denovo             | 18185898                       | (T/C)       |
| 22424       | CakSNP22424    | <i>Kabuli</i>    | Ca_Kabuli_denovo             | 18185916                       | (A/G)       |
| 22425       | CakSNP22425    | <i>Kabuli</i>    | Ca_Kabuli_denovo             | 18196616                       | (T/C)       |
| 22426       | CakSNP22426    | <i>Kabuli</i>    | Ca_Kabuli_denovo             | 18196660                       | (G/C)       |
| 22427       | CakSNP22427    | <i>Kabuli</i>    | Ca_Kabuli_denovo             | 18199026                       | (C/T)       |
| 22428       | CakSNP22428    | <i>Kabuli</i>    | Ca_Kabuli_denovo             | 18209704                       | (G/A)       |
| 22429       | CakSNP22429    | <i>Kabuli</i>    | Ca_Kabuli_denovo             | 18209734                       | (A/C)       |
| 22430       | CakSNP22430    | <i>Kabuli</i>    | Ca_Kabuli_denovo             | 18214361                       | (T/C)       |
| 22431       | CakSNP22431    | <i>Kabuli</i>    | Ca_Kabuli_denovo             | 18214422                       | (A/C)       |
| 22432       | CakSNP22432    | <i>Kabuli</i>    | Ca_Kabuli_denovo             | 18214627                       | (C/G)       |
| 22433       | CakSNP22433    | <i>Kabuli</i>    | Ca_Kabuli_denovo             | 18214630                       | (C/T)       |
| 22434       | CakSNP22434    | <i>Kabuli</i>    | Ca_Kabuli_denovo             | 18215680                       | (A/T)       |
| 22435       | CakSNP22435    | <i>Kabuli</i>    | Ca_Kabuli_denovo             | 18215725                       | (G/A)       |
| 22436       | CakSNP22436    | <i>Kabuli</i>    | Ca_Kabuli_denovo             | 18225599                       | (A/G)       |
| 22437       | CakSNP22437    | <i>Kabuli</i>    | Ca_Kabuli_denovo             | 18225626                       | (G/A)       |
| 22438       | CakSNP22438    | <i>Kabuli</i>    | Ca_Kabuli_denovo             | 18226822                       | (C/T)       |
| 22439       | CakSNP22439    | <i>Kabuli</i>    | Ca_Kabuli_denovo             | 18229442                       | (C/A)       |
| 22440       | CakSNP22440    | <i>Kabuli</i>    | Ca_Kabuli_denovo             | 18232712                       | (C/T)       |
| 22441       | CakSNP22441    | <i>Kabuli</i>    | Ca_Kabuli_denovo             | 18232715                       | (A/G)       |
| 22442       | CakSNP22442    | <i>Kabuli</i>    | Ca_Kabuli_denovo             | 18240760                       | (G/C)       |
| 22443       | CakSNP22443    | <i>Kabuli</i>    | Ca_Kabuli_denovo             | 18240772                       | (C/T)       |
| 22444       | CakSNP22444    | <i>Kabuli</i>    | Ca_Kabuli_denovo             | 18244217                       | (G/C)       |
| 22445       | CakSNP22445    | <i>Kabuli</i>    | Ca_Kabuli_denovo             | 18244244                       | (A/G)       |
| 22446       | CakSNP22446    | <i>Kabuli</i>    | Ca_Kabuli_denovo             | 18249035                       | (G/T)       |
| 22447       | CakSNP22447    | <i>Kabuli</i>    | Ca_Kabuli_denovo             | 18254434                       | (C/G)       |
| 22448       | CakSNP22448    | <i>Kabuli</i>    | Ca_Kabuli_denovo             | 18254479                       | (A/G)       |
| 22449       | CakSNP22449    | <i>Kabuli</i>    | Ca_Kabuli_denovo             | 18255571                       | (T/C)       |
| 22450       | CakSNP22450    | <i>Kabuli</i>    | Ca_Kabuli_denovo             | 18255580                       | (G/T)       |
| 22451       | CakSNP22451    | <i>Kabuli</i>    | Ca_Kabuli_denovo             | 18255938                       | (T/C)       |
| 22452       | CakSNP22452    | <i>Kabuli</i>    | Ca_Kabuli_denovo             | 18259685                       | (T/C)       |
| 22453       | CakSNP22453    | <i>Kabuli</i>    | Ca_Kabuli_denovo             | 18259712                       | (G/C)       |
| 22454       | CakSNP22454    | <i>Kabuli</i>    | Ca_Kabuli_denovo             | 18260199                       | (G/A)       |
| 22455       | CakSNP22455    | <i>Kabuli</i>    | Ca_Kabuli_denovo             | 18260208                       | (A/C)       |
| 22456       | CakSNP22456    | <i>Kabuli</i>    | Ca_Kabuli_denovo             | 18268558                       | (T/G)       |
| 22457       | CakSNP22457    | <i>Kabuli</i>    | Ca_Kabuli_denovo             | 18268564                       | (T/C)       |

| <b>S.N.</b> | <b>SNP IDs</b> | <b>Cultivars</b> | <b>Chromosomes/scaffolds</b> | <b>Physical positions (bp)</b> | <b>SNPs</b> |
|-------------|----------------|------------------|------------------------------|--------------------------------|-------------|
| 22458       | CakSNP22458    | <i>Kabuli</i>    | Ca_Kabuli_denovo             | 18269034                       | (A/G)       |
| 22459       | CakSNP22459    | <i>Kabuli</i>    | Ca_Kabuli_denovo             | 18270676                       | (T/C)       |
| 22460       | CakSNP22460    | <i>Kabuli</i>    | Ca_Kabuli_denovo             | 18270688                       | (T/G)       |
| 22461       | CakSNP22461    | <i>Kabuli</i>    | Ca_Kabuli_denovo             | 18270828                       | (G/A)       |
| 22462       | CakSNP22462    | <i>Kabuli</i>    | Ca_Kabuli_denovo             | 18270846                       | (C/G)       |
| 22463       | CakSNP22463    | <i>Kabuli</i>    | Ca_Kabuli_denovo             | 18274147                       | (T/C)       |
| 22464       | CakSNP22464    | <i>Kabuli</i>    | Ca_Kabuli_denovo             | 18275905                       | (T/C)       |
| 22465       | CakSNP22465    | <i>Kabuli</i>    | Ca_Kabuli_denovo             | 18276932                       | (A/G)       |
| 22466       | CakSNP22466    | <i>Kabuli</i>    | Ca_Kabuli_denovo             | 18279539                       | (C/T)       |
| 22467       | CakSNP22467    | <i>Kabuli</i>    | Ca_Kabuli_denovo             | 18284434                       | (G/A)       |
| 22468       | CakSNP22468    | <i>Kabuli</i>    | Ca_Kabuli_denovo             | 18284503                       | (G/C)       |
| 22469       | CakSNP22469    | <i>Kabuli</i>    | Ca_Kabuli_denovo             | 18288645                       | (T/C)       |
| 22470       | CakSNP22470    | <i>Kabuli</i>    | Ca_Kabuli_denovo             | 18292460                       | (G/A)       |
| 22471       | CakSNP22471    | <i>Kabuli</i>    | Ca_Kabuli_denovo             | 18293034                       | (A/G)       |
| 22472       | CakSNP22472    | <i>Kabuli</i>    | Ca_Kabuli_denovo             | 18303244                       | (T/C)       |
| 22473       | CakSNP22473    | <i>Kabuli</i>    | Ca_Kabuli_denovo             | 18312877                       | (G/A)       |
| 22474       | CakSNP22474    | <i>Kabuli</i>    | Ca_Kabuli_denovo             | 18315388                       | (T/C)       |
| 22475       | CakSNP22475    | <i>Kabuli</i>    | Ca_Kabuli_denovo             | 18326563                       | (C/G)       |
| 22476       | CakSNP22476    | <i>Kabuli</i>    | Ca_Kabuli_denovo             | 18326575                       | (C/T)       |
| 22477       | CakSNP22477    | <i>Kabuli</i>    | Ca_Kabuli_denovo             | 18326977                       | (G/A)       |
| 22478       | CakSNP22478    | <i>Kabuli</i>    | Ca_Kabuli_denovo             | 18330217                       | (T/C)       |
| 22479       | CakSNP22479    | <i>Kabuli</i>    | Ca_Kabuli_denovo             | 18330247                       | (C/T)       |
| 22480       | CakSNP22480    | <i>Kabuli</i>    | Ca_Kabuli_denovo             | 18349380                       | (C/G)       |
| 22481       | CakSNP22481    | <i>Kabuli</i>    | Ca_Kabuli_denovo             | 18351620                       | (T/G)       |
| 22482       | CakSNP22482    | <i>Kabuli</i>    | Ca_Kabuli_denovo             | 18352549                       | (T/C)       |
| 22483       | CakSNP22483    | <i>Kabuli</i>    | Ca_Kabuli_denovo             | 18352558                       | (A/C)       |
| 22484       | CakSNP22484    | <i>Kabuli</i>    | Ca_Kabuli_denovo             | 18354146                       | (A/G)       |
| 22485       | CakSNP22485    | <i>Kabuli</i>    | Ca_Kabuli_denovo             | 18354163                       | (T/C)       |
| 22486       | CakSNP22486    | <i>Kabuli</i>    | Ca_Kabuli_denovo             | 18357472                       | (A/G)       |
| 22487       | CakSNP22487    | <i>Kabuli</i>    | Ca_Kabuli_denovo             | 18368995                       | (G/A)       |
| 22488       | CakSNP22488    | <i>Kabuli</i>    | Ca_Kabuli_denovo             | 18369476                       | (G/T)       |
| 22489       | CakSNP22489    | <i>Kabuli</i>    | Ca_Kabuli_denovo             | 18369482                       | (T/C)       |
| 22490       | CakSNP22490    | <i>Kabuli</i>    | Ca_Kabuli_denovo             | 18371972                       | (A/C)       |
| 22491       | CakSNP22491    | <i>Kabuli</i>    | Ca_Kabuli_denovo             | 18371974                       | (T/C)       |
| 22492       | CakSNP22492    | <i>Kabuli</i>    | Ca_Kabuli_denovo             | 18378184                       | (A/G)       |
| 22493       | CakSNP22493    | <i>Kabuli</i>    | Ca_Kabuli_denovo             | 18378189                       | (G/A)       |
| 22494       | CakSNP22494    | <i>Kabuli</i>    | Ca_Kabuli_denovo             | 18379267                       | (G/A)       |
| 22495       | CakSNP22495    | <i>Kabuli</i>    | Ca_Kabuli_denovo             | 18380355                       | (A/G)       |

| <b>S.N.</b> | <b>SNP IDs</b> | <b>Cultivars</b> | <b>Chromosomes/scaffolds</b> | <b>Physical positions (bp)</b> | <b>SNPs</b> |
|-------------|----------------|------------------|------------------------------|--------------------------------|-------------|
| 22496       | CakSNP22496    | <i>Kabuli</i>    | Ca_Kabuli_denovo             | 18382345                       | (G/C)       |
| 22497       | CakSNP22497    | <i>Kabuli</i>    | Ca_Kabuli_denovo             | 18383189                       | (C/T)       |
| 22498       | CakSNP22498    | <i>Kabuli</i>    | Ca_Kabuli_denovo             | 18387158                       | (T/C)       |
| 22499       | CakSNP22499    | <i>Kabuli</i>    | Ca_Kabuli_denovo             | 18387172                       | (G/A)       |
| 22500       | CakSNP22500    | <i>Kabuli</i>    | Ca_Kabuli_denovo             | 18395703                       | (G/A)       |
| 22501       | CakSNP22501    | <i>Kabuli</i>    | Ca_Kabuli_denovo             | 18399965                       | (G/C)       |
| 22502       | CakSNP22502    | <i>Kabuli</i>    | Ca_Kabuli_denovo             | 18399994                       | (T/C)       |
| 22503       | CakSNP22503    | <i>Kabuli</i>    | Ca_Kabuli_denovo             | 18400927                       | (G/C)       |
| 22504       | CakSNP22504    | <i>Kabuli</i>    | Ca_Kabuli_denovo             | 18400934                       | (G/A)       |
| 22505       | CakSNP22505    | <i>Kabuli</i>    | Ca_Kabuli_denovo             | 18411242                       | (T/C)       |
| 22506       | CakSNP22506    | <i>Kabuli</i>    | Ca_Kabuli_denovo             | 18411256                       | (G/A)       |
| 22507       | CakSNP22507    | <i>Kabuli</i>    | Ca_Kabuli_denovo             | 18416998                       | (G/C)       |
| 22508       | CakSNP22508    | <i>Kabuli</i>    | Ca_Kabuli_denovo             | 18416999                       | (C/G)       |
| 22509       | CakSNP22509    | <i>Kabuli</i>    | Ca_Kabuli_denovo             | 18417740                       | (C/G)       |
| 22510       | CakSNP22510    | <i>Kabuli</i>    | Ca_Kabuli_denovo             | 18417754                       | (T/C)       |
| 22511       | CakSNP22511    | <i>Kabuli</i>    | Ca_Kabuli_denovo             | 18423214                       | (C/T)       |
| 22512       | CakSNP22512    | <i>Kabuli</i>    | Ca_Kabuli_denovo             | 18423619                       | (C/T)       |
| 22513       | CakSNP22513    | <i>Kabuli</i>    | Ca_Kabuli_denovo             | 18423628                       | (T/C)       |
| 22514       | CakSNP22514    | <i>Kabuli</i>    | Ca_Kabuli_denovo             | 18423994                       | (G/A)       |
| 22515       | CakSNP22515    | <i>Kabuli</i>    | Ca_Kabuli_denovo             | 18428416                       | (G/T)       |
| 22516       | CakSNP22516    | <i>Kabuli</i>    | Ca_Kabuli_denovo             | 18429367                       | (T/G)       |
| 22517       | CakSNP22517    | <i>Kabuli</i>    | Ca_Kabuli_denovo             | 18429383                       | (A/G)       |
| 22518       | CakSNP22518    | <i>Kabuli</i>    | Ca_Kabuli_denovo             | 18432130                       | (T/C)       |
| 22519       | CakSNP22519    | <i>Kabuli</i>    | Ca_Kabuli_denovo             | 18432188                       | (T/C)       |
| 22520       | CakSNP22520    | <i>Kabuli</i>    | Ca_Kabuli_denovo             | 18437366                       | (C/A)       |
| 22521       | CakSNP22521    | <i>Kabuli</i>    | Ca_Kabuli_denovo             | 18438204                       | (A/G)       |
| 22522       | CakSNP22522    | <i>Kabuli</i>    | Ca_Kabuli_denovo             | 18440440                       | (G/A)       |
| 22523       | CakSNP22523    | <i>Kabuli</i>    | Ca_Kabuli_denovo             | 18451604                       | (G/A)       |
| 22524       | CakSNP22524    | <i>Kabuli</i>    | Ca_Kabuli_denovo             | 18451622                       | (C/A)       |
| 22525       | CakSNP22525    | <i>Kabuli</i>    | Ca_Kabuli_denovo             | 18455332                       | (G/A)       |
| 22526       | CakSNP22526    | <i>Kabuli</i>    | Ca_Kabuli_denovo             | 18455350                       | (C/A)       |
| 22527       | CakSNP22527    | <i>Kabuli</i>    | Ca_Kabuli_denovo             | 18455356                       | (T/C)       |
| 22528       | CakSNP22528    | <i>Kabuli</i>    | Ca_Kabuli_denovo             | 18459497                       | (C/G)       |
| 22529       | CakSNP22529    | <i>Kabuli</i>    | Ca_Kabuli_denovo             | 18462101                       | (A/C)       |
| 22530       | CakSNP22530    | <i>Kabuli</i>    | Ca_Kabuli_denovo             | 18464620                       | (A/G)       |
| 22531       | CakSNP22531    | <i>Kabuli</i>    | Ca_Kabuli_denovo             | 18464648                       | (G/A)       |
| 22532       | CakSNP22532    | <i>Kabuli</i>    | Ca_Kabuli_denovo             | 18466527                       | (G/C)       |
| 22533       | CakSNP22533    | <i>Kabuli</i>    | Ca_Kabuli_denovo             | 18466539                       | (T/C)       |

| <b>S.N.</b> | <b>SNP IDs</b> | <b>Cultivars</b> | <b>Chromosomes/scaffolds</b> | <b>Physical positions (bp)</b> | <b>SNPs</b> |
|-------------|----------------|------------------|------------------------------|--------------------------------|-------------|
| 22534       | CakSNP22534    | <i>Kabuli</i>    | Ca_Kabuli_denovo             | 18469553                       | (G/T)       |
| 22535       | CakSNP22535    | <i>Kabuli</i>    | Ca_Kabuli_denovo             | 18470860                       | (T/C)       |
| 22536       | CakSNP22536    | <i>Kabuli</i>    | Ca_Kabuli_denovo             | 18474096                       | (A/G)       |
| 22537       | CakSNP22537    | <i>Kabuli</i>    | Ca_Kabuli_denovo             | 18476944                       | (T/G)       |
| 22538       | CakSNP22538    | <i>Kabuli</i>    | Ca_Kabuli_denovo             | 18477935                       | (A/G)       |
| 22539       | CakSNP22539    | <i>Kabuli</i>    | Ca_Kabuli_denovo             | 18479017                       | (G/C)       |
| 22540       | CakSNP22540    | <i>Kabuli</i>    | Ca_Kabuli_denovo             | 18484876                       | (C/T)       |
| 22541       | CakSNP22541    | <i>Kabuli</i>    | Ca_Kabuli_denovo             | 18492425                       | (G/C)       |
| 22542       | CakSNP22542    | <i>Kabuli</i>    | Ca_Kabuli_denovo             | 18492458                       | (A/G)       |
| 22543       | CakSNP22543    | <i>Kabuli</i>    | Ca_Kabuli_denovo             | 18492911                       | (G/C)       |
| 22544       | CakSNP22544    | <i>Kabuli</i>    | Ca_Kabuli_denovo             | 18497528                       | (G/A)       |
| 22545       | CakSNP22545    | <i>Kabuli</i>    | Ca_Kabuli_denovo             | 18497537                       | (T/C)       |
| 22546       | CakSNP22546    | <i>Kabuli</i>    | Ca_Kabuli_denovo             | 18501632                       | (G/A)       |
| 22547       | CakSNP22547    | <i>Kabuli</i>    | Ca_Kabuli_denovo             | 18501638                       | (G/A)       |
| 22548       | CakSNP22548    | <i>Kabuli</i>    | Ca_Kabuli_denovo             | 18504613                       | (C/A)       |
| 22549       | CakSNP22549    | <i>Kabuli</i>    | Ca_Kabuli_denovo             | 18509084                       | (C/T)       |
| 22550       | CakSNP22550    | <i>Kabuli</i>    | Ca_Kabuli_denovo             | 18512044                       | (A/C)       |
| 22551       | CakSNP22551    | <i>Kabuli</i>    | Ca_Kabuli_denovo             | 18512047                       | (G/A)       |
| 22552       | CakSNP22552    | <i>Kabuli</i>    | Ca_Kabuli_denovo             | 18512138                       | (A/G)       |
| 22553       | CakSNP22553    | <i>Kabuli</i>    | Ca_Kabuli_denovo             | 18515042                       | (A/G)       |
| 22554       | CakSNP22554    | <i>Kabuli</i>    | Ca_Kabuli_denovo             | 18518254                       | (A/C)       |
| 22555       | CakSNP22555    | <i>Kabuli</i>    | Ca_Kabuli_denovo             | 18520034                       | (C/G)       |
| 22556       | CakSNP22556    | <i>Kabuli</i>    | Ca_Kabuli_denovo             | 18520055                       | (T/C)       |
| 22557       | CakSNP22557    | <i>Kabuli</i>    | Ca_Kabuli_denovo             | 18524435                       | (C/T)       |
| 22558       | CakSNP22558    | <i>Kabuli</i>    | Ca_Kabuli_denovo             | 18524445                       | (A/C)       |
| 22559       | CakSNP22559    | <i>Kabuli</i>    | Ca_Kabuli_denovo             | 18524597                       | (C/G)       |
| 22560       | CakSNP22560    | <i>Kabuli</i>    | Ca_Kabuli_denovo             | 18529410                       | (T/C)       |
| 22561       | CakSNP22561    | <i>Kabuli</i>    | Ca_Kabuli_denovo             | 18539598                       | (C/A)       |
| 22562       | CakSNP22562    | <i>Kabuli</i>    | Ca_Kabuli_denovo             | 18542780                       | (T/A)       |
| 22563       | CakSNP22563    | <i>Kabuli</i>    | Ca_Kabuli_denovo             | 18543466                       | (C/G)       |
| 22564       | CakSNP22564    | <i>Kabuli</i>    | Ca_Kabuli_denovo             | 18543550                       | (G/T)       |
| 22565       | CakSNP22565    | <i>Kabuli</i>    | Ca_Kabuli_denovo             | 18543835                       | (T/C)       |
| 22566       | CakSNP22566    | <i>Kabuli</i>    | Ca_Kabuli_denovo             | 18545659                       | (A/G)       |
| 22567       | CakSNP22567    | <i>Kabuli</i>    | Ca_Kabuli_denovo             | 18552228                       | (C/G)       |
| 22568       | CakSNP22568    | <i>Kabuli</i>    | Ca_Kabuli_denovo             | 18558448                       | (C/A)       |
| 22569       | CakSNP22569    | <i>Kabuli</i>    | Ca_Kabuli_denovo             | 18559193                       | (C/T)       |
| 22570       | CakSNP22570    | <i>Kabuli</i>    | Ca_Kabuli_denovo             | 18559231                       | (G/A)       |
| 22571       | CakSNP22571    | <i>Kabuli</i>    | Ca_Kabuli_denovo             | 18559927                       | (G/A)       |

| <b>S.N.</b> | <b>SNP IDs</b> | <b>Cultivars</b> | <b>Chromosomes/scaffolds</b> | <b>Physical positions (bp)</b> | <b>SNPs</b> |
|-------------|----------------|------------------|------------------------------|--------------------------------|-------------|
| 22572       | CakSNP22572    | <i>Kabuli</i>    | Ca_Kabuli_denovo             | 18563930                       | (G/A)       |
| 22573       | CakSNP22573    | <i>Kabuli</i>    | Ca_Kabuli_denovo             | 18563978                       | (C/T)       |
| 22574       | CakSNP22574    | <i>Kabuli</i>    | Ca_Kabuli_denovo             | 18566071                       | (C/T)       |
| 22575       | CakSNP22575    | <i>Kabuli</i>    | Ca_Kabuli_denovo             | 18568152                       | (T/C)       |
| 22576       | CakSNP22576    | <i>Kabuli</i>    | Ca_Kabuli_denovo             | 18568157                       | (T/C)       |
| 22577       | CakSNP22577    | <i>Kabuli</i>    | Ca_Kabuli_denovo             | 18569485                       | (C/T)       |
| 22578       | CakSNP22578    | <i>Kabuli</i>    | Ca_Kabuli_denovo             | 18569488                       | (T/C)       |
| 22579       | CakSNP22579    | <i>Kabuli</i>    | Ca_Kabuli_denovo             | 18573632                       | (G/A)       |
| 22580       | CakSNP22580    | <i>Kabuli</i>    | Ca_Kabuli_denovo             | 18579933                       | (C/T)       |
| 22581       | CakSNP22581    | <i>Kabuli</i>    | Ca_Kabuli_denovo             | 18581122                       | (A/C)       |
| 22582       | CakSNP22582    | <i>Kabuli</i>    | Ca_Kabuli_denovo             | 18586183                       | (G/T)       |
| 22583       | CakSNP22583    | <i>Kabuli</i>    | Ca_Kabuli_denovo             | 18586211                       | (A/G)       |
| 22584       | CakSNP22584    | <i>Kabuli</i>    | Ca_Kabuli_denovo             | 18587105                       | (C/T)       |
| 22585       | CakSNP22585    | <i>Kabuli</i>    | Ca_Kabuli_denovo             | 18589602                       | (T/C)       |
| 22586       | CakSNP22586    | <i>Kabuli</i>    | Ca_Kabuli_denovo             | 18591097                       | (A/G)       |
| 22587       | CakSNP22587    | <i>Kabuli</i>    | Ca_Kabuli_denovo             | 18592866                       | (C/G)       |
| 22588       | CakSNP22588    | <i>Kabuli</i>    | Ca_Kabuli_denovo             | 18592869                       | (C/T)       |
| 22589       | CakSNP22589    | <i>Kabuli</i>    | Ca_Kabuli_denovo             | 18596290                       | (T/C)       |
| 22590       | CakSNP22590    | <i>Kabuli</i>    | Ca_Kabuli_denovo             | 18596296                       | (T/G)       |
| 22591       | CakSNP22591    | <i>Kabuli</i>    | Ca_Kabuli_denovo             | 18597427                       | (G/A)       |
| 22592       | CakSNP22592    | <i>Kabuli</i>    | Ca_Kabuli_denovo             | 18597485                       | (C/T)       |
| 22593       | CakSNP22593    | <i>Kabuli</i>    | Ca_Kabuli_denovo             | 18598249                       | (C/G)       |
| 22594       | CakSNP22594    | <i>Kabuli</i>    | Ca_Kabuli_denovo             | 18606359                       | (C/A)       |
| 22595       | CakSNP22595    | <i>Kabuli</i>    | Ca_Kabuli_denovo             | 18608180                       | (G/A)       |
| 22596       | CakSNP22596    | <i>Kabuli</i>    | Ca_Kabuli_denovo             | 18608195                       | (T/C)       |
| 22597       | CakSNP22597    | <i>Kabuli</i>    | Ca_Kabuli_denovo             | 18614037                       | (T/C)       |
| 22598       | CakSNP22598    | <i>Kabuli</i>    | Ca_Kabuli_denovo             | 18618464                       | (A/G)       |
| 22599       | CakSNP22599    | <i>Kabuli</i>    | Ca_Kabuli_denovo             | 18620233                       | (T/C)       |
| 22600       | CakSNP22600    | <i>Kabuli</i>    | Ca_Kabuli_denovo             | 18623050                       | (G/A)       |
| 22601       | CakSNP22601    | <i>Kabuli</i>    | Ca_Kabuli_denovo             | 18623064                       | (G/A)       |
| 22602       | CakSNP22602    | <i>Kabuli</i>    | Ca_Kabuli_denovo             | 18623808                       | (T/C)       |
| 22603       | CakSNP22603    | <i>Kabuli</i>    | Ca_Kabuli_denovo             | 18624662                       | (G/A)       |
| 22604       | CakSNP22604    | <i>Kabuli</i>    | Ca_Kabuli_denovo             | 18624688                       | (T/C)       |
| 22605       | CakSNP22605    | <i>Kabuli</i>    | Ca_Kabuli_denovo             | 18627935                       | (A/G)       |
| 22606       | CakSNP22606    | <i>Kabuli</i>    | Ca_Kabuli_denovo             | 18632591                       | (A/C)       |
| 22607       | CakSNP22607    | <i>Kabuli</i>    | Ca_Kabuli_denovo             | 18633248                       | (G/A)       |
| 22608       | CakSNP22608    | <i>Kabuli</i>    | Ca_Kabuli_denovo             | 18639938                       | (A/G)       |
| 22609       | CakSNP22609    | <i>Kabuli</i>    | Ca_Kabuli_denovo             | 18641122                       | (C/G)       |

| <b>S.N.</b> | <b>SNP IDs</b> | <b>Cultivars</b> | <b>Chromosomes/scaffolds</b> | <b>Physical positions (bp)</b> | <b>SNPs</b> |
|-------------|----------------|------------------|------------------------------|--------------------------------|-------------|
| 22610       | CakSNP22610    | <i>Kabuli</i>    | Ca_Kabuli_denovo             | 18641197                       | (C/G)       |
| 22611       | CakSNP22611    | <i>Kabuli</i>    | Ca_Kabuli_denovo             | 18645319                       | (C/T)       |
| 22612       | CakSNP22612    | <i>Kabuli</i>    | Ca_Kabuli_denovo             | 18646865                       | (T/C)       |
| 22613       | CakSNP22613    | <i>Kabuli</i>    | Ca_Kabuli_denovo             | 18650506                       | (G/A)       |
| 22614       | CakSNP22614    | <i>Kabuli</i>    | Ca_Kabuli_denovo             | 18651436                       | (C/A)       |
| 22615       | CakSNP22615    | <i>Kabuli</i>    | Ca_Kabuli_denovo             | 18651511                       | (T/C)       |
| 22616       | CakSNP22616    | <i>Kabuli</i>    | Ca_Kabuli_denovo             | 18663629                       | (G/A)       |
| 22617       | CakSNP22617    | <i>Kabuli</i>    | Ca_Kabuli_denovo             | 18663648                       | (T/A)       |
| 22618       | CakSNP22618    | <i>Kabuli</i>    | Ca_Kabuli_denovo             | 18670780                       | (T/G)       |
| 22619       | CakSNP22619    | <i>Kabuli</i>    | Ca_Kabuli_denovo             | 18671340                       | (T/C)       |
| 22620       | CakSNP22620    | <i>Kabuli</i>    | Ca_Kabuli_denovo             | 18671551                       | (A/G)       |
| 22621       | CakSNP22621    | <i>Kabuli</i>    | Ca_Kabuli_denovo             | 18671557                       | (G/C)       |
| 22622       | CakSNP22622    | <i>Kabuli</i>    | Ca_Kabuli_denovo             | 18675353                       | (A/G)       |
| 22623       | CakSNP22623    | <i>Kabuli</i>    | Ca_Kabuli_denovo             | 18675369                       | (G/C)       |
| 22624       | CakSNP22624    | <i>Kabuli</i>    | Ca_Kabuli_denovo             | 18676288                       | (G/A)       |
| 22625       | CakSNP22625    | <i>Kabuli</i>    | Ca_Kabuli_denovo             | 18676421                       | (T/C)       |
| 22626       | CakSNP22626    | <i>Kabuli</i>    | Ca_Kabuli_denovo             | 18676427                       | (T/C)       |
| 22627       | CakSNP22627    | <i>Kabuli</i>    | Ca_Kabuli_denovo             | 18678872                       | (A/G)       |
| 22628       | CakSNP22628    | <i>Kabuli</i>    | Ca_Kabuli_denovo             | 18680021                       | (C/T)       |
| 22629       | CakSNP22629    | <i>Kabuli</i>    | Ca_Kabuli_denovo             | 18680071                       | (C/A)       |
| 22630       | CakSNP22630    | <i>Kabuli</i>    | Ca_Kabuli_denovo             | 18680107                       | (A/C)       |
| 22631       | CakSNP22631    | <i>Kabuli</i>    | Ca_Kabuli_denovo             | 18685944                       | (A/C)       |
| 22632       | CakSNP22632    | <i>Kabuli</i>    | Ca_Kabuli_denovo             | 18690041                       | (C/A)       |
| 22633       | CakSNP22633    | <i>Kabuli</i>    | Ca_Kabuli_denovo             | 18690059                       | (A/T)       |
| 22634       | CakSNP22634    | <i>Kabuli</i>    | Ca_Kabuli_denovo             | 18696550                       | (C/T)       |
| 22635       | CakSNP22635    | <i>Kabuli</i>    | Ca_Kabuli_denovo             | 18696580                       | (G/A)       |
| 22636       | CakSNP22636    | <i>Kabuli</i>    | Ca_Kabuli_denovo             | 18700033                       | (G/C)       |
| 22637       | CakSNP22637    | <i>Kabuli</i>    | Ca_Kabuli_denovo             | 18704924                       | (A/C)       |
| 22638       | CakSNP22638    | <i>Kabuli</i>    | Ca_Kabuli_denovo             | 18705814                       | (A/C)       |
| 22639       | CakSNP22639    | <i>Kabuli</i>    | Ca_Kabuli_denovo             | 18712035                       | (G/T)       |
| 22640       | CakSNP22640    | <i>Kabuli</i>    | Ca_Kabuli_denovo             | 18713763                       | (A/T)       |
| 22641       | CakSNP22641    | <i>Kabuli</i>    | Ca_Kabuli_denovo             | 18713777                       | (G/A)       |
| 22642       | CakSNP22642    | <i>Kabuli</i>    | Ca_Kabuli_denovo             | 18713783                       | (T/C)       |
| 22643       | CakSNP22643    | <i>Kabuli</i>    | Ca_Kabuli_denovo             | 18716914                       | (A/G)       |
| 22644       | CakSNP22644    | <i>Kabuli</i>    | Ca_Kabuli_denovo             | 18722230                       | (G/T)       |
| 22645       | CakSNP22645    | <i>Kabuli</i>    | Ca_Kabuli_denovo             | 18724934                       | (G/A)       |
| 22646       | CakSNP22646    | <i>Kabuli</i>    | Ca_Kabuli_denovo             | 18726509                       | (A/G)       |
| 22647       | CakSNP22647    | <i>Kabuli</i>    | Ca_Kabuli_denovo             | 18727704                       | (A/G)       |

| <b>S.N.</b> | <b>SNP IDs</b> | <b>Cultivars</b> | <b>Chromosomes/scaffolds</b> | <b>Physical positions (bp)</b> | <b>SNPs</b> |
|-------------|----------------|------------------|------------------------------|--------------------------------|-------------|
| 22648       | CakSNP22648    | <i>Kabuli</i>    | Ca_Kabuli_denovo             | 18727738                       | (G/C)       |
| 22649       | CakSNP22649    | <i>Kabuli</i>    | Ca_Kabuli_denovo             | 18728749                       | (T/G)       |
| 22650       | CakSNP22650    | <i>Kabuli</i>    | Ca_Kabuli_denovo             | 18728774                       | (T/G)       |
| 22651       | CakSNP22651    | <i>Kabuli</i>    | Ca_Kabuli_denovo             | 18733070                       | (C/T)       |
| 22652       | CakSNP22652    | <i>Kabuli</i>    | Ca_Kabuli_denovo             | 18733079                       | (C/G)       |
| 22653       | CakSNP22653    | <i>Kabuli</i>    | Ca_Kabuli_denovo             | 18739407                       | (A/C)       |
| 22654       | CakSNP22654    | <i>Kabuli</i>    | Ca_Kabuli_denovo             | 18739408                       | (A/G)       |
| 22655       | CakSNP22655    | <i>Kabuli</i>    | Ca_Kabuli_denovo             | 18747163                       | (G/A)       |
| 22656       | CakSNP22656    | <i>Kabuli</i>    | Ca_Kabuli_denovo             | 18748718                       | (C/A)       |
| 22657       | CakSNP22657    | <i>Kabuli</i>    | Ca_Kabuli_denovo             | 18748786                       | (T/C)       |
| 22658       | CakSNP22658    | <i>Kabuli</i>    | Ca_Kabuli_denovo             | 18753052                       | (A/G)       |
| 22659       | CakSNP22659    | <i>Kabuli</i>    | Ca_Kabuli_denovo             | 18756362                       | (C/T)       |
| 22660       | CakSNP22660    | <i>Kabuli</i>    | Ca_Kabuli_denovo             | 18762726                       | (G/A)       |
| 22661       | CakSNP22661    | <i>Kabuli</i>    | Ca_Kabuli_denovo             | 18762744                       | (C/A)       |
| 22662       | CakSNP22662    | <i>Kabuli</i>    | Ca_Kabuli_denovo             | 18763792                       | (G/T)       |
| 22663       | CakSNP22663    | <i>Kabuli</i>    | Ca_Kabuli_denovo             | 18770479                       | (C/T)       |
| 22664       | CakSNP22664    | <i>Kabuli</i>    | Ca_Kabuli_denovo             | 18770536                       | (T/C)       |
| 22665       | CakSNP22665    | <i>Kabuli</i>    | Ca_Kabuli_denovo             | 18770586                       | (C/T)       |
| 22666       | CakSNP22666    | <i>Kabuli</i>    | Ca_Kabuli_denovo             | 18773521                       | (G/A)       |
| 22667       | CakSNP22667    | <i>Kabuli</i>    | Ca_Kabuli_denovo             | 18775835                       | (T/C)       |
| 22668       | CakSNP22668    | <i>Kabuli</i>    | Ca_Kabuli_denovo             | 18775837                       | (A/G)       |
| 22669       | CakSNP22669    | <i>Kabuli</i>    | Ca_Kabuli_denovo             | 18777081                       | (C/G)       |
| 22670       | CakSNP22670    | <i>Kabuli</i>    | Ca_Kabuli_denovo             | 18787985                       | (C/G)       |
| 22671       | CakSNP22671    | <i>Kabuli</i>    | Ca_Kabuli_denovo             | 18788003                       | (T/C)       |
| 22672       | CakSNP22672    | <i>Kabuli</i>    | Ca_Kabuli_denovo             | 18790370                       | (A/C)       |
| 22673       | CakSNP22673    | <i>Kabuli</i>    | Ca_Kabuli_denovo             | 18791098                       | (C/T)       |
| 22674       | CakSNP22674    | <i>Kabuli</i>    | Ca_Kabuli_denovo             | 18791101                       | (C/A)       |
| 22675       | CakSNP22675    | <i>Kabuli</i>    | Ca_Kabuli_denovo             | 18793121                       | (T/C)       |
| 22676       | CakSNP22676    | <i>Kabuli</i>    | Ca_Kabuli_denovo             | 18803897                       | (A/G)       |
| 22677       | CakSNP22677    | <i>Kabuli</i>    | Ca_Kabuli_denovo             | 18803935                       | (G/C)       |
| 22678       | CakSNP22678    | <i>Kabuli</i>    | Ca_Kabuli_denovo             | 18806483                       | (C/T)       |
| 22679       | CakSNP22679    | <i>Kabuli</i>    | Ca_Kabuli_denovo             | 18808206                       | (T/G)       |
| 22680       | CakSNP22680    | <i>Kabuli</i>    | Ca_Kabuli_denovo             | 18808227                       | (T/G)       |
| 22681       | CakSNP22681    | <i>Kabuli</i>    | Ca_Kabuli_denovo             | 18809542                       | (C/T)       |
| 22682       | CakSNP22682    | <i>Kabuli</i>    | Ca_Kabuli_denovo             | 18812003                       | (G/T)       |
| 22683       | CakSNP22683    | <i>Kabuli</i>    | Ca_Kabuli_denovo             | 18813549                       | (G/A)       |
| 22684       | CakSNP22684    | <i>Kabuli</i>    | Ca_Kabuli_denovo             | 18814122                       | (G/A)       |
| 22685       | CakSNP22685    | <i>Kabuli</i>    | Ca_Kabuli_denovo             | 18816705                       | (T/C)       |

| <b>S.N.</b> | <b>SNP IDs</b> | <b>Cultivars</b> | <b>Chromosomes/scaffolds</b> | <b>Physical positions (bp)</b> | <b>SNPs</b> |
|-------------|----------------|------------------|------------------------------|--------------------------------|-------------|
| 22686       | CakSNP22686    | <i>Kabuli</i>    | Ca_Kabuli_denovo             | 18816713                       | (G/A)       |
| 22687       | CakSNP22687    | <i>Kabuli</i>    | Ca_Kabuli_denovo             | 18828492                       | (G/A)       |
| 22688       | CakSNP22688    | <i>Kabuli</i>    | Ca_Kabuli_denovo             | 18829915                       | (C/A)       |
| 22689       | CakSNP22689    | <i>Kabuli</i>    | Ca_Kabuli_denovo             | 18829924                       | (A/G)       |
| 22690       | CakSNP22690    | <i>Kabuli</i>    | Ca_Kabuli_denovo             | 18832361                       | (G/T)       |
| 22691       | CakSNP22691    | <i>Kabuli</i>    | Ca_Kabuli_denovo             | 18832368                       | (G/C)       |
| 22692       | CakSNP22692    | <i>Kabuli</i>    | Ca_Kabuli_denovo             | 18834096                       | (C/G)       |
| 22693       | CakSNP22693    | <i>Kabuli</i>    | Ca_Kabuli_denovo             | 18835613                       | (T/C)       |
| 22694       | CakSNP22694    | <i>Kabuli</i>    | Ca_Kabuli_denovo             | 18836177                       | (C/T)       |
| 22695       | CakSNP22695    | <i>Kabuli</i>    | Ca_Kabuli_denovo             | 18841637                       | (A/G)       |
| 22696       | CakSNP22696    | <i>Kabuli</i>    | Ca_Kabuli_denovo             | 18841640                       | (T/G)       |
| 22697       | CakSNP22697    | <i>Kabuli</i>    | Ca_Kabuli_denovo             | 18849251                       | (G/A)       |
| 22698       | CakSNP22698    | <i>Kabuli</i>    | Ca_Kabuli_denovo             | 18850197                       | (A/G)       |
| 22699       | CakSNP22699    | <i>Kabuli</i>    | Ca_Kabuli_denovo             | 18850203                       | (C/T)       |
| 22700       | CakSNP22700    | <i>Kabuli</i>    | Ca_Kabuli_denovo             | 18850655                       | (G/A)       |
| 22701       | CakSNP22701    | <i>Kabuli</i>    | Ca_Kabuli_denovo             | 18850691                       | (G/C)       |
| 22702       | CakSNP22702    | <i>Kabuli</i>    | Ca_Kabuli_denovo             | 18852209                       | (A/G)       |
| 22703       | CakSNP22703    | <i>Kabuli</i>    | Ca_Kabuli_denovo             | 18852950                       | (A/G)       |
| 22704       | CakSNP22704    | <i>Kabuli</i>    | Ca_Kabuli_denovo             | 18856357                       | (T/C)       |
| 22705       | CakSNP22705    | <i>Kabuli</i>    | Ca_Kabuli_denovo             | 18857764                       | (C/T)       |
| 22706       | CakSNP22706    | <i>Kabuli</i>    | Ca_Kabuli_denovo             | 18857773                       | (T/C)       |
| 22707       | CakSNP22707    | <i>Kabuli</i>    | Ca_Kabuli_denovo             | 18860305                       | (A/G)       |
| 22708       | CakSNP22708    | <i>Kabuli</i>    | Ca_Kabuli_denovo             | 18867206                       | (A/G)       |
| 22709       | CakSNP22709    | <i>Kabuli</i>    | Ca_Kabuli_denovo             | 18869392                       | (G/A)       |
| 22710       | CakSNP22710    | <i>Kabuli</i>    | Ca_Kabuli_denovo             | 18869409                       | (A/C)       |
| 22711       | CakSNP22711    | <i>Kabuli</i>    | Ca_Kabuli_denovo             | 18872425                       | (C/T)       |
| 22712       | CakSNP22712    | <i>Kabuli</i>    | Ca_Kabuli_denovo             | 18872431                       | (T/C)       |
| 22713       | CakSNP22713    | <i>Kabuli</i>    | Ca_Kabuli_denovo             | 18872443                       | (T/C)       |
| 22714       | CakSNP22714    | <i>Kabuli</i>    | Ca_Kabuli_denovo             | 18873043                       | (G/A)       |
| 22715       | CakSNP22715    | <i>Kabuli</i>    | Ca_Kabuli_denovo             | 18873726                       | (T/C)       |
| 22716       | CakSNP22716    | <i>Kabuli</i>    | Ca_Kabuli_denovo             | 18873766                       | (G/A)       |
| 22717       | CakSNP22717    | <i>Kabuli</i>    | Ca_Kabuli_denovo             | 18878910                       | (T/A)       |
| 22718       | CakSNP22718    | <i>Kabuli</i>    | Ca_Kabuli_denovo             | 18879388                       | (G/T)       |
| 22719       | CakSNP22719    | <i>Kabuli</i>    | Ca_Kabuli_denovo             | 18880593                       | (T/C)       |
| 22720       | CakSNP22720    | <i>Kabuli</i>    | Ca_Kabuli_denovo             | 18881435                       | (T/G)       |
| 22721       | CakSNP22721    | <i>Kabuli</i>    | Ca_Kabuli_denovo             | 18882519                       | (T/C)       |
| 22722       | CakSNP22722    | <i>Kabuli</i>    | Ca_Kabuli_denovo             | 18891748                       | (T/G)       |
| 22723       | CakSNP22723    | <i>Kabuli</i>    | Ca_Kabuli_denovo             | 18891754                       | (T/C)       |



| <b>S.N.</b> | <b>SNP IDs</b> | <b>Cultivars</b> | <b>Chromosomes/scaffolds</b> | <b>Physical positions (bp)</b> | <b>SNPs</b> |
|-------------|----------------|------------------|------------------------------|--------------------------------|-------------|
| 22724       | CakSNP22724    | <i>Kabuli</i>    | Ca_Kabuli_denovo             | 18892953                       | (A/T)       |
| 22725       | CakSNP22725    | <i>Kabuli</i>    | Ca_Kabuli_denovo             | 18896152                       | (A/G)       |
| 22726       | CakSNP22726    | <i>Kabuli</i>    | Ca_Kabuli_denovo             | 18898353                       | (C/A)       |
| 22727       | CakSNP22727    | <i>Kabuli</i>    | Ca_Kabuli_denovo             | 18898800                       | (C/T)       |
| 22728       | CakSNP22728    | <i>Kabuli</i>    | Ca_Kabuli_denovo             | 18899861                       | (A/G)       |
| 22729       | CakSNP22729    | <i>Kabuli</i>    | Ca_Kabuli_denovo             | 18899909                       | (C/G)       |
| 22730       | CakSNP22730    | <i>Kabuli</i>    | Ca_Kabuli_denovo             | 18900482                       | (A/C)       |
| 22731       | CakSNP22731    | <i>Kabuli</i>    | Ca_Kabuli_denovo             | 18900483                       | (G/T)       |
| 22732       | CakSNP22732    | <i>Kabuli</i>    | Ca_Kabuli_denovo             | 18900484                       | (A/G)       |
| 22733       | CakSNP22733    | <i>Kabuli</i>    | Ca_Kabuli_denovo             | 18905479                       | (G/A)       |
| 22734       | CakSNP22734    | <i>Kabuli</i>    | Ca_Kabuli_denovo             | 18911372                       | (C/G)       |
| 22735       | CakSNP22735    | <i>Kabuli</i>    | Ca_Kabuli_denovo             | 18911381                       | (A/G)       |
| 22736       | CakSNP22736    | <i>Kabuli</i>    | Ca_Kabuli_denovo             | 18924368                       | (C/A)       |
| 22737       | CakSNP22737    | <i>Kabuli</i>    | Ca_Kabuli_denovo             | 18927874                       | (G/C)       |
| 22738       | CakSNP22738    | <i>Kabuli</i>    | Ca_Kabuli_denovo             | 18930752                       | (A/G)       |
| 22739       | CakSNP22739    | <i>Kabuli</i>    | Ca_Kabuli_denovo             | 18930761                       | (T/C)       |
| 22740       | CakSNP22740    | <i>Kabuli</i>    | Ca_Kabuli_denovo             | 18930885                       | (A/G)       |
| 22741       | CakSNP22741    | <i>Kabuli</i>    | Ca_Kabuli_denovo             | 18930894                       | (A/G)       |
| 22742       | CakSNP22742    | <i>Kabuli</i>    | Ca_Kabuli_denovo             | 18934921                       | (C/T)       |
| 22743       | CakSNP22743    | <i>Kabuli</i>    | Ca_Kabuli_denovo             | 18934964                       | (C/T)       |
| 22744       | CakSNP22744    | <i>Kabuli</i>    | Ca_Kabuli_denovo             | 18935278                       | (C/T)       |
| 22745       | CakSNP22745    | <i>Kabuli</i>    | Ca_Kabuli_denovo             | 18938911                       | (G/A)       |
| 22746       | CakSNP22746    | <i>Kabuli</i>    | Ca_Kabuli_denovo             | 18938964                       | (G/C)       |
| 22747       | CakSNP22747    | <i>Kabuli</i>    | Ca_Kabuli_denovo             | 18940227                       | (G/C)       |
| 22748       | CakSNP22748    | <i>Kabuli</i>    | Ca_Kabuli_denovo             | 18949813                       | (C/T)       |
| 22749       | CakSNP22749    | <i>Kabuli</i>    | Ca_Kabuli_denovo             | 18951660                       | (G/C)       |
| 22750       | CakSNP22750    | <i>Kabuli</i>    | Ca_Kabuli_denovo             | 18951699                       | (G/C)       |
| 22751       | CakSNP22751    | <i>Kabuli</i>    | Ca_Kabuli_denovo             | 18951736                       | (A/G)       |
| 22752       | CakSNP22752    | <i>Kabuli</i>    | Ca_Kabuli_denovo             | 18951760                       | (A/G)       |
| 22753       | CakSNP22753    | <i>Kabuli</i>    | Ca_Kabuli_denovo             | 18968953                       | (G/C)       |
| 22754       | CakSNP22754    | <i>Kabuli</i>    | Ca_Kabuli_denovo             | 18969406                       | (A/G)       |
| 22755       | CakSNP22755    | <i>Kabuli</i>    | Ca_Kabuli_denovo             | 18969451                       | (A/G)       |
| 22756       | CakSNP22756    | <i>Kabuli</i>    | Ca_Kabuli_denovo             | 18975086                       | (G/A)       |
| 22757       | CakSNP22757    | <i>Kabuli</i>    | Ca_Kabuli_denovo             | 18975094                       | (T/C)       |
| 22758       | CakSNP22758    | <i>Kabuli</i>    | Ca_Kabuli_denovo             | 18975107                       | (T/C)       |
| 22759       | CakSNP22759    | <i>Kabuli</i>    | Ca_Kabuli_denovo             | 18975761                       | (T/C)       |
| 22760       | CakSNP22760    | <i>Kabuli</i>    | Ca_Kabuli_denovo             | 18975813                       | (A/G)       |
| 22761       | CakSNP22761    | <i>Kabuli</i>    | Ca_Kabuli_denovo             | 18976289                       | (G/A)       |

| <b>S.N.</b> | <b>SNP IDs</b> | <b>Cultivars</b> | <b>Chromosomes/scaffolds</b> | <b>Physical positions (bp)</b> | <b>SNPs</b> |
|-------------|----------------|------------------|------------------------------|--------------------------------|-------------|
| 22762       | CakSNP22762    | <i>Kabuli</i>    | Ca_Kabuli_denovo             | 18976292                       | (G/A)       |
| 22763       | CakSNP22763    | <i>Kabuli</i>    | Ca_Kabuli_denovo             | 18977055                       | (C/G)       |
| 22764       | CakSNP22764    | <i>Kabuli</i>    | Ca_Kabuli_denovo             | 18978483                       | (T/C)       |
| 22765       | CakSNP22765    | <i>Kabuli</i>    | Ca_Kabuli_denovo             | 18981320                       | (T/C)       |
| 22766       | CakSNP22766    | <i>Kabuli</i>    | Ca_Kabuli_denovo             | 18987252                       | (G/T)       |
| 22767       | CakSNP22767    | <i>Kabuli</i>    | Ca_Kabuli_denovo             | 18992585                       | (G/A)       |
| 22768       | CakSNP22768    | <i>Kabuli</i>    | Ca_Kabuli_denovo             | 18997411                       | (T/C)       |
| 22769       | CakSNP22769    | <i>Kabuli</i>    | Ca_Kabuli_denovo             | 19005025                       | (A/C)       |
| 22770       | CakSNP22770    | <i>Kabuli</i>    | Ca_Kabuli_denovo             | 19005067                       | (G/T)       |
| 22771       | CakSNP22771    | <i>Kabuli</i>    | Ca_Kabuli_denovo             | 19006159                       | (T/C)       |
| 22772       | CakSNP22772    | <i>Kabuli</i>    | Ca_Kabuli_denovo             | 19008722                       | (A/T)       |
| 22773       | CakSNP22773    | <i>Kabuli</i>    | Ca_Kabuli_denovo             | 19010698                       | (T/C)       |
| 22774       | CakSNP22774    | <i>Kabuli</i>    | Ca_Kabuli_denovo             | 19010774                       | (G/A)       |
| 22775       | CakSNP22775    | <i>Kabuli</i>    | Ca_Kabuli_denovo             | 19016555                       | (G/A)       |
| 22776       | CakSNP22776    | <i>Kabuli</i>    | Ca_Kabuli_denovo             | 19016573                       | (A/G)       |
| 22777       | CakSNP22777    | <i>Kabuli</i>    | Ca_Kabuli_denovo             | 19017747                       | (T/G)       |
| 22778       | CakSNP22778    | <i>Kabuli</i>    | Ca_Kabuli_denovo             | 19019311                       | (C/G)       |
| 22779       | CakSNP22779    | <i>Kabuli</i>    | Ca_Kabuli_denovo             | 19026033                       | (A/C)       |
| 22780       | CakSNP22780    | <i>Kabuli</i>    | Ca_Kabuli_denovo             | 19026034                       | (G/C)       |
| 22781       | CakSNP22781    | <i>Kabuli</i>    | Ca_Kabuli_denovo             | 19032739                       | (G/A)       |
| 22782       | CakSNP22782    | <i>Kabuli</i>    | Ca_Kabuli_denovo             | 19034113                       | (A/T)       |
| 22783       | CakSNP22783    | <i>Kabuli</i>    | Ca_Kabuli_denovo             | 19040086                       | (T/C)       |
| 22784       | CakSNP22784    | <i>Kabuli</i>    | Ca_Kabuli_denovo             | 19040170                       | (G/T)       |
| 22785       | CakSNP22785    | <i>Kabuli</i>    | Ca_Kabuli_denovo             | 19045310                       | (G/A)       |
| 22786       | CakSNP22786    | <i>Kabuli</i>    | Ca_Kabuli_denovo             | 19049477                       | (T/C)       |
| 22787       | CakSNP22787    | <i>Kabuli</i>    | Ca_Kabuli_denovo             | 19050458                       | (A/T)       |
| 22788       | CakSNP22788    | <i>Kabuli</i>    | Ca_Kabuli_denovo             | 19056692                       | (A/G)       |
| 22789       | CakSNP22789    | <i>Kabuli</i>    | Ca_Kabuli_denovo             | 19056836                       | (C/T)       |
| 22790       | CakSNP22790    | <i>Kabuli</i>    | Ca_Kabuli_denovo             | 19056854                       | (G/C)       |
| 22791       | CakSNP22791    | <i>Kabuli</i>    | Ca_Kabuli_denovo             | 19063347                       | (C/G)       |
| 22792       | CakSNP22792    | <i>Kabuli</i>    | Ca_Kabuli_denovo             | 19066239                       | (C/A)       |
| 22793       | CakSNP22793    | <i>Kabuli</i>    | Ca_Kabuli_denovo             | 19069211                       | (T/C)       |
| 22794       | CakSNP22794    | <i>Kabuli</i>    | Ca_Kabuli_denovo             | 19069247                       | (A/G)       |
| 22795       | CakSNP22795    | <i>Kabuli</i>    | Ca_Kabuli_denovo             | 19069451                       | (T/C)       |
| 22796       | CakSNP22796    | <i>Kabuli</i>    | Ca_Kabuli_denovo             | 19079071                       | (C/T)       |
| 22797       | CakSNP22797    | <i>Kabuli</i>    | Ca_Kabuli_denovo             | 19079086                       | (C/G)       |
| 22798       | CakSNP22798    | <i>Kabuli</i>    | Ca_Kabuli_denovo             | 19087156                       | (T/G)       |
| 22799       | CakSNP22799    | <i>Kabuli</i>    | Ca_Kabuli_denovo             | 19088934                       | (C/G)       |

| <b>S.N.</b> | <b>SNP IDs</b> | <b>Cultivars</b> | <b>Chromosomes/scaffolds</b> | <b>Physical positions (bp)</b> | <b>SNPs</b> |
|-------------|----------------|------------------|------------------------------|--------------------------------|-------------|
| 22800       | CakSNP22800    | <i>Kabuli</i>    | Ca_Kabuli_denovo             | 19088942                       | (C/T)       |
| 22801       | CakSNP22801    | <i>Kabuli</i>    | Ca_Kabuli_denovo             | 19089410                       | (G/A)       |
| 22802       | CakSNP22802    | <i>Kabuli</i>    | Ca_Kabuli_denovo             | 19089454                       | (G/T)       |
| 22803       | CakSNP22803    | <i>Kabuli</i>    | Ca_Kabuli_denovo             | 19090604                       | (G/A)       |
| 22804       | CakSNP22804    | <i>Kabuli</i>    | Ca_Kabuli_denovo             | 19091010                       | (T/C)       |
| 22805       | CakSNP22805    | <i>Kabuli</i>    | Ca_Kabuli_denovo             | 19091040                       | (A/C)       |
| 22806       | CakSNP22806    | <i>Kabuli</i>    | Ca_Kabuli_denovo             | 19091083                       | (T/C)       |
| 22807       | CakSNP22807    | <i>Kabuli</i>    | Ca_Kabuli_denovo             | 19093687                       | (G/T)       |
| 22808       | CakSNP22808    | <i>Kabuli</i>    | Ca_Kabuli_denovo             | 19096458                       | (A/G)       |
| 22809       | CakSNP22809    | <i>Kabuli</i>    | Ca_Kabuli_denovo             | 19108084                       | (G/A)       |
| 22810       | CakSNP22810    | <i>Kabuli</i>    | Ca_Kabuli_denovo             | 19108134                       | (G/A)       |
| 22811       | CakSNP22811    | <i>Kabuli</i>    | Ca_Kabuli_denovo             | 19108151                       | (G/C)       |
| 22812       | CakSNP22812    | <i>Kabuli</i>    | Ca_Kabuli_denovo             | 19110319                       | (C/T)       |
| 22813       | CakSNP22813    | <i>Kabuli</i>    | Ca_Kabuli_denovo             | 19110332                       | (A/G)       |
| 22814       | CakSNP22814    | <i>Kabuli</i>    | Ca_Kabuli_denovo             | 19110398                       | (C/A)       |
| 22815       | CakSNP22815    | <i>Kabuli</i>    | Ca_Kabuli_denovo             | 19126783                       | (T/A)       |
| 22816       | CakSNP22816    | <i>Kabuli</i>    | Ca_Kabuli_denovo             | 19132339                       | (A/C)       |
| 22817       | CakSNP22817    | <i>Kabuli</i>    | Ca_Kabuli_denovo             | 19132396                       | (T/C)       |
| 22818       | CakSNP22818    | <i>Kabuli</i>    | Ca_Kabuli_denovo             | 19135975                       | (G/A)       |
| 22819       | CakSNP22819    | <i>Kabuli</i>    | Ca_Kabuli_denovo             | 19136023                       | (A/G)       |
| 22820       | CakSNP22820    | <i>Kabuli</i>    | Ca_Kabuli_denovo             | 19138028                       | (T/C)       |
| 22821       | CakSNP22821    | <i>Kabuli</i>    | Ca_Kabuli_denovo             | 19138056                       | (G/A)       |
| 22822       | CakSNP22822    | <i>Kabuli</i>    | Ca_Kabuli_denovo             | 19147683                       | (A/G)       |
| 22823       | CakSNP22823    | <i>Kabuli</i>    | Ca_Kabuli_denovo             | 19147701                       | (T/C)       |
| 22824       | CakSNP22824    | <i>Kabuli</i>    | Ca_Kabuli_denovo             | 19149268                       | (C/T)       |
| 22825       | CakSNP22825    | <i>Kabuli</i>    | Ca_Kabuli_denovo             | 19154228                       | (G/A)       |
| 22826       | CakSNP22826    | <i>Kabuli</i>    | Ca_Kabuli_denovo             | 19154258                       | (A/G)       |
| 22827       | CakSNP22827    | <i>Kabuli</i>    | Ca_Kabuli_denovo             | 19155218                       | (T/C)       |
| 22828       | CakSNP22828    | <i>Kabuli</i>    | Ca_Kabuli_denovo             | 19155611                       | (A/G)       |
| 22829       | CakSNP22829    | <i>Kabuli</i>    | Ca_Kabuli_denovo             | 19155614                       | (G/A)       |
| 22830       | CakSNP22830    | <i>Kabuli</i>    | Ca_Kabuli_denovo             | 19156125                       | (T/C)       |
| 22831       | CakSNP22831    | <i>Kabuli</i>    | Ca_Kabuli_denovo             | 19158322                       | (T/C)       |
| 22832       | CakSNP22832    | <i>Kabuli</i>    | Ca_Kabuli_denovo             | 19160518                       | (C/T)       |
| 22833       | CakSNP22833    | <i>Kabuli</i>    | Ca_Kabuli_denovo             | 19160524                       | (T/A)       |
| 22834       | CakSNP22834    | <i>Kabuli</i>    | Ca_Kabuli_denovo             | 19161853                       | (C/A)       |
| 22835       | CakSNP22835    | <i>Kabuli</i>    | Ca_Kabuli_denovo             | 19163941                       | (C/G)       |
| 22836       | CakSNP22836    | <i>Kabuli</i>    | Ca_Kabuli_denovo             | 19169207                       | (G/T)       |
| 22837       | CakSNP22837    | <i>Kabuli</i>    | Ca_Kabuli_denovo             | 19169216                       | (C/T)       |

| <b>S.N.</b> | <b>SNP IDs</b> | <b>Cultivars</b> | <b>Chromosomes/scaffolds</b> | <b>Physical positions (bp)</b> | <b>SNPs</b> |
|-------------|----------------|------------------|------------------------------|--------------------------------|-------------|
| 22838       | CakSNP22838    | <i>Kabuli</i>    | Ca_Kabuli_denovo             | 19171720                       | (G/A)       |
| 22839       | CakSNP22839    | <i>Kabuli</i>    | Ca_Kabuli_denovo             | 19171726                       | (A/G)       |
| 22840       | CakSNP22840    | <i>Kabuli</i>    | Ca_Kabuli_denovo             | 19177383                       | (C/A)       |
| 22841       | CakSNP22841    | <i>Kabuli</i>    | Ca_Kabuli_denovo             | 19177386                       | (C/A)       |
| 22842       | CakSNP22842    | <i>Kabuli</i>    | Ca_Kabuli_denovo             | 19184471                       | (C/T)       |
| 22843       | CakSNP22843    | <i>Kabuli</i>    | Ca_Kabuli_denovo             | 19185765                       | (A/G)       |
| 22844       | CakSNP22844    | <i>Kabuli</i>    | Ca_Kabuli_denovo             | 19185789                       | (A/G)       |
| 22845       | CakSNP22845    | <i>Kabuli</i>    | Ca_Kabuli_denovo             | 19191108                       | (A/C)       |
| 22846       | CakSNP22846    | <i>Kabuli</i>    | Ca_Kabuli_denovo             | 19191109                       | (A/G)       |
| 22847       | CakSNP22847    | <i>Kabuli</i>    | Ca_Kabuli_denovo             | 19192438                       | (G/A)       |
| 22848       | CakSNP22848    | <i>Kabuli</i>    | Ca_Kabuli_denovo             | 19192486                       | (C/T)       |
| 22849       | CakSNP22849    | <i>Kabuli</i>    | Ca_Kabuli_denovo             | 19195741                       | (A/G)       |
| 22850       | CakSNP22850    | <i>Kabuli</i>    | Ca_Kabuli_denovo             | 19195744                       | (G/A)       |
| 22851       | CakSNP22851    | <i>Kabuli</i>    | Ca_Kabuli_denovo             | 19198315                       | (T/C)       |
| 22852       | CakSNP22852    | <i>Kabuli</i>    | Ca_Kabuli_denovo             | 19198343                       | (T/G)       |
| 22853       | CakSNP22853    | <i>Kabuli</i>    | Ca_Kabuli_denovo             | 19200266                       | (A/G)       |
| 22854       | CakSNP22854    | <i>Kabuli</i>    | Ca_Kabuli_denovo             | 19201724                       | (T/G)       |
| 22855       | CakSNP22855    | <i>Kabuli</i>    | Ca_Kabuli_denovo             | 19206320                       | (T/C)       |
| 22856       | CakSNP22856    | <i>Kabuli</i>    | Ca_Kabuli_denovo             | 19223412                       | (C/T)       |
| 22857       | CakSNP22857    | <i>Kabuli</i>    | Ca_Kabuli_denovo             | 19223413                       | (G/T)       |
| 22858       | CakSNP22858    | <i>Kabuli</i>    | Ca_Kabuli_denovo             | 19229621                       | (A/G)       |
| 22859       | CakSNP22859    | <i>Kabuli</i>    | Ca_Kabuli_denovo             | 19234774                       | (T/C)       |
| 22860       | CakSNP22860    | <i>Kabuli</i>    | Ca_Kabuli_denovo             | 19238116                       | (A/C)       |
| 22861       | CakSNP22861    | <i>Kabuli</i>    | Ca_Kabuli_denovo             | 19238124                       | (C/G)       |
| 22862       | CakSNP22862    | <i>Kabuli</i>    | Ca_Kabuli_denovo             | 19238946                       | (C/T)       |
| 22863       | CakSNP22863    | <i>Kabuli</i>    | Ca_Kabuli_denovo             | 19240781                       | (T/C)       |
| 22864       | CakSNP22864    | <i>Kabuli</i>    | Ca_Kabuli_denovo             | 19240800                       | (G/A)       |
| 22865       | CakSNP22865    | <i>Kabuli</i>    | Ca_Kabuli_denovo             | 19247383                       | (G/C)       |
| 22866       | CakSNP22866    | <i>Kabuli</i>    | Ca_Kabuli_denovo             | 19248118                       | (A/C)       |
| 22867       | CakSNP22867    | <i>Kabuli</i>    | Ca_Kabuli_denovo             | 19251244                       | (C/T)       |
| 22868       | CakSNP22868    | <i>Kabuli</i>    | Ca_Kabuli_denovo             | 19254548                       | (C/A)       |
| 22869       | CakSNP22869    | <i>Kabuli</i>    | Ca_Kabuli_denovo             | 19254587                       | (A/G)       |
| 22870       | CakSNP22870    | <i>Kabuli</i>    | Ca_Kabuli_denovo             | 19256586                       | (C/T)       |
| 22871       | CakSNP22871    | <i>Kabuli</i>    | Ca_Kabuli_denovo             | 19274063                       | (T/G)       |
| 22872       | CakSNP22872    | <i>Kabuli</i>    | Ca_Kabuli_denovo             | 19275686                       | (C/T)       |
| 22873       | CakSNP22873    | <i>Kabuli</i>    | Ca_Kabuli_denovo             | 19275704                       | (T/C)       |
| 22874       | CakSNP22874    | <i>Kabuli</i>    | Ca_Kabuli_denovo             | 19279916                       | (T/G)       |
| 22875       | CakSNP22875    | <i>Kabuli</i>    | Ca_Kabuli_denovo             | 19284224                       | (A/G)       |

| <b>S.N.</b> | <b>SNP IDs</b> | <b>Cultivars</b> | <b>Chromosomes/scaffolds</b> | <b>Physical positions (bp)</b> | <b>SNPs</b> |
|-------------|----------------|------------------|------------------------------|--------------------------------|-------------|
| 22876       | CakSNP22876    | <i>Kabuli</i>    | Ca_Kabuli_denovo             | 19284257                       | (G/C)       |
| 22877       | CakSNP22877    | <i>Kabuli</i>    | Ca_Kabuli_denovo             | 19287074                       | (C/T)       |
| 22878       | CakSNP22878    | <i>Kabuli</i>    | Ca_Kabuli_denovo             | 19294446                       | (G/A)       |
| 22879       | CakSNP22879    | <i>Kabuli</i>    | Ca_Kabuli_denovo             | 19294650                       | (G/A)       |
| 22880       | CakSNP22880    | <i>Kabuli</i>    | Ca_Kabuli_denovo             | 19295751                       | (T/C)       |
| 22881       | CakSNP22881    | <i>Kabuli</i>    | Ca_Kabuli_denovo             | 19302256                       | (A/G)       |
| 22882       | CakSNP22882    | <i>Kabuli</i>    | Ca_Kabuli_denovo             | 19303277                       | (T/C)       |
| 22883       | CakSNP22883    | <i>Kabuli</i>    | Ca_Kabuli_denovo             | 19304858                       | (T/C)       |
| 22884       | CakSNP22884    | <i>Kabuli</i>    | Ca_Kabuli_denovo             | 19304894                       | (T/C)       |
| 22885       | CakSNP22885    | <i>Kabuli</i>    | Ca_Kabuli_denovo             | 19304897                       | (C/T)       |
| 22886       | CakSNP22886    | <i>Kabuli</i>    | Ca_Kabuli_denovo             | 19315474                       | (G/A)       |
| 22887       | CakSNP22887    | <i>Kabuli</i>    | Ca_Kabuli_denovo             | 19315480                       | (G/A)       |
| 22888       | CakSNP22888    | <i>Kabuli</i>    | Ca_Kabuli_denovo             | 19323757                       | (A/G)       |
| 22889       | CakSNP22889    | <i>Kabuli</i>    | Ca_Kabuli_denovo             | 19328354                       | (C/A)       |
| 22890       | CakSNP22890    | <i>Kabuli</i>    | Ca_Kabuli_denovo             | 19331804                       | (G/A)       |
| 22891       | CakSNP22891    | <i>Kabuli</i>    | Ca_Kabuli_denovo             | 19332683                       | (G/T)       |
| 22892       | CakSNP22892    | <i>Kabuli</i>    | Ca_Kabuli_denovo             | 19335471                       | (C/G)       |
| 22893       | CakSNP22893    | <i>Kabuli</i>    | Ca_Kabuli_denovo             | 19346404                       | (T/C)       |
| 22894       | CakSNP22894    | <i>Kabuli</i>    | Ca_Kabuli_denovo             | 19348192                       | (A/C)       |
| 22895       | CakSNP22895    | <i>Kabuli</i>    | Ca_Kabuli_denovo             | 19348233                       | (C/G)       |
| 22896       | CakSNP22896    | <i>Kabuli</i>    | Ca_Kabuli_denovo             | 19349645                       | (T/G)       |
| 22897       | CakSNP22897    | <i>Kabuli</i>    | Ca_Kabuli_denovo             | 19350085                       | (G/A)       |
| 22898       | CakSNP22898    | <i>Kabuli</i>    | Ca_Kabuli_denovo             | 19352147                       | (G/A)       |
| 22899       | CakSNP22899    | <i>Kabuli</i>    | Ca_Kabuli_denovo             | 19356539                       | (C/T)       |
| 22900       | CakSNP22900    | <i>Kabuli</i>    | Ca_Kabuli_denovo             | 19361046                       | (A/G)       |
| 22901       | CakSNP22901    | <i>Kabuli</i>    | Ca_Kabuli_denovo             | 19367179                       | (T/C)       |
| 22902       | CakSNP22902    | <i>Kabuli</i>    | Ca_Kabuli_denovo             | 19370551                       | (T/C)       |
| 22903       | CakSNP22903    | <i>Kabuli</i>    | Ca_Kabuli_denovo             | 19374728                       | (A/G)       |
| 22904       | CakSNP22904    | <i>Kabuli</i>    | Ca_Kabuli_denovo             | 19376336                       | (G/A)       |
| 22905       | CakSNP22905    | <i>Kabuli</i>    | Ca_Kabuli_denovo             | 19376363                       | (G/A)       |
| 22906       | CakSNP22906    | <i>Kabuli</i>    | Ca_Kabuli_denovo             | 19379073                       | (C/T)       |
| 22907       | CakSNP22907    | <i>Kabuli</i>    | Ca_Kabuli_denovo             | 19379306                       | (C/A)       |
| 22908       | CakSNP22908    | <i>Kabuli</i>    | Ca_Kabuli_denovo             | 19379735                       | (T/C)       |
| 22909       | CakSNP22909    | <i>Kabuli</i>    | Ca_Kabuli_denovo             | 19385230                       | (C/G)       |
| 22910       | CakSNP22910    | <i>Kabuli</i>    | Ca_Kabuli_denovo             | 19385511                       | (G/C)       |
| 22911       | CakSNP22911    | <i>Kabuli</i>    | Ca_Kabuli_denovo             | 19385523                       | (A/G)       |
| 22912       | CakSNP22912    | <i>Kabuli</i>    | Ca_Kabuli_denovo             | 19390162                       | (C/T)       |
| 22913       | CakSNP22913    | <i>Kabuli</i>    | Ca_Kabuli_denovo             | 19390333                       | (T/C)       |

| <b>S.N.</b> | <b>SNP IDs</b> | <b>Cultivars</b> | <b>Chromosomes/scaffolds</b> | <b>Physical positions (bp)</b> | <b>SNPs</b> |
|-------------|----------------|------------------|------------------------------|--------------------------------|-------------|
| 22914       | CakSNP22914    | <i>Kabuli</i>    | Ca_Kabuli_denovo             | 19391252                       | (C/T)       |
| 22915       | CakSNP22915    | <i>Kabuli</i>    | Ca_Kabuli_denovo             | 19398054                       | (C/A)       |
| 22916       | CakSNP22916    | <i>Kabuli</i>    | Ca_Kabuli_denovo             | 19398085                       | (T/C)       |
| 22917       | CakSNP22917    | <i>Kabuli</i>    | Ca_Kabuli_denovo             | 19398318                       | (G/A)       |
| 22918       | CakSNP22918    | <i>Kabuli</i>    | Ca_Kabuli_denovo             | 19400571                       | (C/T)       |
| 22919       | CakSNP22919    | <i>Kabuli</i>    | Ca_Kabuli_denovo             | 19401445                       | (G/C)       |
| 22920       | CakSNP22920    | <i>Kabuli</i>    | Ca_Kabuli_denovo             | 19401475                       | (A/G)       |
| 22921       | CakSNP22921    | <i>Kabuli</i>    | Ca_Kabuli_denovo             | 19402744                       | (C/G)       |
| 22922       | CakSNP22922    | <i>Kabuli</i>    | Ca_Kabuli_denovo             | 19407853                       | (C/G)       |
| 22923       | CakSNP22923    | <i>Kabuli</i>    | Ca_Kabuli_denovo             | 19416866                       | (C/T)       |
| 22924       | CakSNP22924    | <i>Kabuli</i>    | Ca_Kabuli_denovo             | 19421553                       | (C/T)       |
| 22925       | CakSNP22925    | <i>Kabuli</i>    | Ca_Kabuli_denovo             | 19421556                       | (A/G)       |
| 22926       | CakSNP22926    | <i>Kabuli</i>    | Ca_Kabuli_denovo             | 19422615                       | (G/A)       |
| 22927       | CakSNP22927    | <i>Kabuli</i>    | Ca_Kabuli_denovo             | 19422629                       | (G/A)       |
| 22928       | CakSNP22928    | <i>Kabuli</i>    | Ca_Kabuli_denovo             | 19429950                       | (T/G)       |
| 22929       | CakSNP22929    | <i>Kabuli</i>    | Ca_Kabuli_denovo             | 19429960                       | (G/A)       |
| 22930       | CakSNP22930    | <i>Kabuli</i>    | Ca_Kabuli_denovo             | 19430010                       | (C/G)       |
| 22931       | CakSNP22931    | <i>Kabuli</i>    | Ca_Kabuli_denovo             | 19430159                       | (G/A)       |
| 22932       | CakSNP22932    | <i>Kabuli</i>    | Ca_Kabuli_denovo             | 19430182                       | (C/A)       |
| 22933       | CakSNP22933    | <i>Kabuli</i>    | Ca_Kabuli_denovo             | 19432428                       | (G/T)       |
| 22934       | CakSNP22934    | <i>Kabuli</i>    | Ca_Kabuli_denovo             | 19434335                       | (A/G)       |
| 22935       | CakSNP22935    | <i>Kabuli</i>    | Ca_Kabuli_denovo             | 19435393                       | (G/T)       |
| 22936       | CakSNP22936    | <i>Kabuli</i>    | Ca_Kabuli_denovo             | 19435406                       | (T/C)       |
| 22937       | CakSNP22937    | <i>Kabuli</i>    | Ca_Kabuli_denovo             | 19446380                       | (G/C)       |
| 22938       | CakSNP22938    | <i>Kabuli</i>    | Ca_Kabuli_denovo             | 19449849                       | (A/G)       |
| 22939       | CakSNP22939    | <i>Kabuli</i>    | Ca_Kabuli_denovo             | 19459653                       | (A/G)       |
| 22940       | CakSNP22940    | <i>Kabuli</i>    | Ca_Kabuli_denovo             | 19459666                       | (G/C)       |
| 22941       | CakSNP22941    | <i>Kabuli</i>    | Ca_Kabuli_denovo             | 19461469                       | (A/G)       |
| 22942       | CakSNP22942    | <i>Kabuli</i>    | Ca_Kabuli_denovo             | 19467652                       | (C/G)       |
| 22943       | CakSNP22943    | <i>Kabuli</i>    | Ca_Kabuli_denovo             | 19482253                       | (T/C)       |
| 22944       | CakSNP22944    | <i>Kabuli</i>    | Ca_Kabuli_denovo             | 19482283                       | (G/C)       |
| 22945       | CakSNP22945    | <i>Kabuli</i>    | Ca_Kabuli_denovo             | 19490764                       | (A/G)       |
| 22946       | CakSNP22946    | <i>Kabuli</i>    | Ca_Kabuli_denovo             | 19490794                       | (G/A)       |
| 22947       | CakSNP22947    | <i>Kabuli</i>    | Ca_Kabuli_denovo             | 19494880                       | (C/T)       |
| 22948       | CakSNP22948    | <i>Kabuli</i>    | Ca_Kabuli_denovo             | 19496641                       | (C/G)       |
| 22949       | CakSNP22949    | <i>Kabuli</i>    | Ca_Kabuli_denovo             | 19496704                       | (C/T)       |
| 22950       | CakSNP22950    | <i>Kabuli</i>    | Ca_Kabuli_denovo             | 19497856                       | (G/A)       |
| 22951       | CakSNP22951    | <i>Kabuli</i>    | Ca_Kabuli_denovo             | 19497910                       | (C/T)       |

| <b>S.N.</b> | <b>SNP IDs</b> | <b>Cultivars</b> | <b>Chromosomes/scaffolds</b> | <b>Physical positions (bp)</b> | <b>SNPs</b> |
|-------------|----------------|------------------|------------------------------|--------------------------------|-------------|
| 22952       | CakSNP22952    | <i>Kabuli</i>    | Ca_Kabuli_denovo             | 19499330                       | (G/T)       |
| 22953       | CakSNP22953    | <i>Kabuli</i>    | Ca_Kabuli_denovo             | 19499333                       | (A/G)       |
| 22954       | CakSNP22954    | <i>Kabuli</i>    | Ca_Kabuli_denovo             | 19500292                       | (C/T)       |
| 22955       | CakSNP22955    | <i>Kabuli</i>    | Ca_Kabuli_denovo             | 19500454                       | (A/G)       |
| 22956       | CakSNP22956    | <i>Kabuli</i>    | Ca_Kabuli_denovo             | 19500513                       | (G/A)       |
| 22957       | CakSNP22957    | <i>Kabuli</i>    | Ca_Kabuli_denovo             | 19504817                       | (C/T)       |
| 22958       | CakSNP22958    | <i>Kabuli</i>    | Ca_Kabuli_denovo             | 19504856                       | (T/G)       |
| 22959       | CakSNP22959    | <i>Kabuli</i>    | Ca_Kabuli_denovo             | 19505980                       | (A/G)       |
| 22960       | CakSNP22960    | <i>Kabuli</i>    | Ca_Kabuli_denovo             | 19508060                       | (C/T)       |
| 22961       | CakSNP22961    | <i>Kabuli</i>    | Ca_Kabuli_denovo             | 19508077                       | (G/T)       |
| 22962       | CakSNP22962    | <i>Kabuli</i>    | Ca_Kabuli_denovo             | 19508114                       | (A/G)       |
| 22963       | CakSNP22963    | <i>Kabuli</i>    | Ca_Kabuli_denovo             | 19509112                       | (C/A)       |
| 22964       | CakSNP22964    | <i>Kabuli</i>    | Ca_Kabuli_denovo             | 19515877                       | (T/C)       |
| 22965       | CakSNP22965    | <i>Kabuli</i>    | Ca_Kabuli_denovo             | 19519198                       | (A/G)       |
| 22966       | CakSNP22966    | <i>Kabuli</i>    | Ca_Kabuli_denovo             | 19519203                       | (G/A)       |
| 22967       | CakSNP22967    | <i>Kabuli</i>    | Ca_Kabuli_denovo             | 19521213                       | (C/G)       |
| 22968       | CakSNP22968    | <i>Kabuli</i>    | Ca_Kabuli_denovo             | 19521958                       | (T/A)       |
| 22969       | CakSNP22969    | <i>Kabuli</i>    | Ca_Kabuli_denovo             | 19521965                       | (A/G)       |
| 22970       | CakSNP22970    | <i>Kabuli</i>    | Ca_Kabuli_denovo             | 19525451                       | (G/A)       |
| 22971       | CakSNP22971    | <i>Kabuli</i>    | Ca_Kabuli_denovo             | 19526859                       | (G/C)       |
| 22972       | CakSNP22972    | <i>Kabuli</i>    | Ca_Kabuli_denovo             | 19526871                       | (T/C)       |
| 22973       | CakSNP22973    | <i>Kabuli</i>    | Ca_Kabuli_denovo             | 19532983                       | (T/C)       |
| 22974       | CakSNP22974    | <i>Kabuli</i>    | Ca_Kabuli_denovo             | 19537330                       | (A/G)       |
| 22975       | CakSNP22975    | <i>Kabuli</i>    | Ca_Kabuli_denovo             | 19547897                       | (G/A)       |
| 22976       | CakSNP22976    | <i>Kabuli</i>    | Ca_Kabuli_denovo             | 19549075                       | (C/T)       |
| 22977       | CakSNP22977    | <i>Kabuli</i>    | Ca_Kabuli_denovo             | 19549145                       | (A/G)       |
| 22978       | CakSNP22978    | <i>Kabuli</i>    | Ca_Kabuli_denovo             | 19554267                       | (A/G)       |
| 22979       | CakSNP22979    | <i>Kabuli</i>    | Ca_Kabuli_denovo             | 19558394                       | (C/T)       |
| 22980       | CakSNP22980    | <i>Kabuli</i>    | Ca_Kabuli_denovo             | 19558883                       | (A/G)       |
| 22981       | CakSNP22981    | <i>Kabuli</i>    | Ca_Kabuli_denovo             | 19559530                       | (T/C)       |
| 22982       | CakSNP22982    | <i>Kabuli</i>    | Ca_Kabuli_denovo             | 19569592                       | (C/G)       |
| 22983       | CakSNP22983    | <i>Kabuli</i>    | Ca_Kabuli_denovo             | 19578021                       | (C/T)       |
| 22984       | CakSNP22984    | <i>Kabuli</i>    | Ca_Kabuli_denovo             | 19580031                       | (C/G)       |
| 22985       | CakSNP22985    | <i>Kabuli</i>    | Ca_Kabuli_denovo             | 19583318                       | (G/A)       |
| 22986       | CakSNP22986    | <i>Kabuli</i>    | Ca_Kabuli_denovo             | 19584237                       | (C/G)       |
| 22987       | CakSNP22987    | <i>Kabuli</i>    | Ca_Kabuli_denovo             | 19592563                       | (A/C)       |
| 22988       | CakSNP22988    | <i>Kabuli</i>    | Ca_Kabuli_denovo             | 19594005                       | (A/T)       |
| 22989       | CakSNP22989    | <i>Kabuli</i>    | Ca_Kabuli_denovo             | 19594048                       | (G/C)       |

| <b>S.N.</b> | <b>SNP IDs</b> | <b>Cultivars</b> | <b>Chromosomes/scaffolds</b> | <b>Physical positions (bp)</b> | <b>SNPs</b> |
|-------------|----------------|------------------|------------------------------|--------------------------------|-------------|
| 22990       | CakSNP22990    | <i>Kabuli</i>    | Ca_Kabuli_denovo             | 19596700                       | (C/G)       |
| 22991       | CakSNP22991    | <i>Kabuli</i>    | Ca_Kabuli_denovo             | 19596703                       | (G/A)       |
| 22992       | CakSNP22992    | <i>Kabuli</i>    | Ca_Kabuli_denovo             | 19596726                       | (G/C)       |
| 22993       | CakSNP22993    | <i>Kabuli</i>    | Ca_Kabuli_denovo             | 19599063                       | (G/A)       |
| 22994       | CakSNP22994    | <i>Kabuli</i>    | Ca_Kabuli_denovo             | 19607491                       | (A/C)       |
| 22995       | CakSNP22995    | <i>Kabuli</i>    | Ca_Kabuli_denovo             | 19607505                       | (G/C)       |
| 22996       | CakSNP22996    | <i>Kabuli</i>    | Ca_Kabuli_denovo             | 19607787                       | (T/C)       |
| 22997       | CakSNP22997    | <i>Kabuli</i>    | Ca_Kabuli_denovo             | 19607832                       | (G/A)       |
| 22998       | CakSNP22998    | <i>Kabuli</i>    | Ca_Kabuli_denovo             | 19609996                       | (C/T)       |
| 22999       | CakSNP22999    | <i>Kabuli</i>    | Ca_Kabuli_denovo             | 19610895                       | (C/G)       |
| 23000       | CakSNP23000    | <i>Kabuli</i>    | Ca_Kabuli_denovo             | 19613068                       | (C/T)       |
| 23001       | CakSNP23001    | <i>Kabuli</i>    | Ca_Kabuli_denovo             | 19629262                       | (A/C)       |
| 23002       | CakSNP23002    | <i>Kabuli</i>    | Ca_Kabuli_denovo             | 19630852                       | (G/A)       |
| 23003       | CakSNP23003    | <i>Kabuli</i>    | Ca_Kabuli_denovo             | 19632166                       | (T/C)       |
| 23004       | CakSNP23004    | <i>Kabuli</i>    | Ca_Kabuli_denovo             | 19632919                       | (C/T)       |
| 23005       | CakSNP23005    | <i>Kabuli</i>    | Ca_Kabuli_denovo             | 19634087                       | (T/C)       |
| 23006       | CakSNP23006    | <i>Kabuli</i>    | Ca_Kabuli_denovo             | 19640222                       | (A/G)       |
| 23007       | CakSNP23007    | <i>Kabuli</i>    | Ca_Kabuli_denovo             | 19640228                       | (C/T)       |
| 23008       | CakSNP23008    | <i>Kabuli</i>    | Ca_Kabuli_denovo             | 19645993                       | (C/T)       |
| 23009       | CakSNP23009    | <i>Kabuli</i>    | Ca_Kabuli_denovo             | 19652525                       | (G/A)       |
| 23010       | CakSNP23010    | <i>Kabuli</i>    | Ca_Kabuli_denovo             | 19657004                       | (G/A)       |
| 23011       | CakSNP23011    | <i>Kabuli</i>    | Ca_Kabuli_denovo             | 19658542                       | (T/C)       |
| 23012       | CakSNP23012    | <i>Kabuli</i>    | Ca_Kabuli_denovo             | 19659001                       | (T/C)       |
| 23013       | CakSNP23013    | <i>Kabuli</i>    | Ca_Kabuli_denovo             | 19661154                       | (C/G)       |
| 23014       | CakSNP23014    | <i>Kabuli</i>    | Ca_Kabuli_denovo             | 19664674                       | (T/A)       |
| 23015       | CakSNP23015    | <i>Kabuli</i>    | Ca_Kabuli_denovo             | 19664737                       | (T/G)       |
| 23016       | CakSNP23016    | <i>Kabuli</i>    | Ca_Kabuli_denovo             | 19666531                       | (A/C)       |
| 23017       | CakSNP23017    | <i>Kabuli</i>    | Ca_Kabuli_denovo             | 19666855                       | (A/G)       |
| 23018       | CakSNP23018    | <i>Kabuli</i>    | Ca_Kabuli_denovo             | 19666861                       | (C/A)       |
| 23019       | CakSNP23019    | <i>Kabuli</i>    | Ca_Kabuli_denovo             | 19670099                       | (G/C)       |
| 23020       | CakSNP23020    | <i>Kabuli</i>    | Ca_Kabuli_denovo             | 19687054                       | (T/C)       |
| 23021       | CakSNP23021    | <i>Kabuli</i>    | Ca_Kabuli_denovo             | 19692882                       | (G/T)       |
| 23022       | CakSNP23022    | <i>Kabuli</i>    | Ca_Kabuli_denovo             | 19692883                       | (A/C)       |
| 23023       | CakSNP23023    | <i>Kabuli</i>    | Ca_Kabuli_denovo             | 19694833                       | (A/G)       |
| 23024       | CakSNP23024    | <i>Kabuli</i>    | Ca_Kabuli_denovo             | 19694872                       | (G/T)       |
| 23025       | CakSNP23025    | <i>Kabuli</i>    | Ca_Kabuli_denovo             | 19695841                       | (C/T)       |
| 23026       | CakSNP23026    | <i>Kabuli</i>    | Ca_Kabuli_denovo             | 19695891                       | (C/T)       |
| 23027       | CakSNP23027    | <i>Kabuli</i>    | Ca_Kabuli_denovo             | 19699736                       | (G/A)       |



| <b>S.N.</b> | <b>SNP IDs</b> | <b>Cultivars</b> | <b>Chromosomes/scaffolds</b> | <b>Physical positions (bp)</b> | <b>SNPs</b> |
|-------------|----------------|------------------|------------------------------|--------------------------------|-------------|
| 23028       | CakSNP23028    | <i>Kabuli</i>    | Ca_Kabuli_denovo             | 19713310                       | (A/G)       |
| 23029       | CakSNP23029    | <i>Kabuli</i>    | Ca_Kabuli_denovo             | 19713350                       | (T/C)       |
| 23030       | CakSNP23030    | <i>Kabuli</i>    | Ca_Kabuli_denovo             | 19715189                       | (C/G)       |
| 23031       | CakSNP23031    | <i>Kabuli</i>    | Ca_Kabuli_denovo             | 19715195                       | (C/T)       |
| 23032       | CakSNP23032    | <i>Kabuli</i>    | Ca_Kabuli_denovo             | 19720566                       | (C/G)       |
| 23033       | CakSNP23033    | <i>Kabuli</i>    | Ca_Kabuli_denovo             | 19720598                       | (T/A)       |
| 23034       | CakSNP23034    | <i>Kabuli</i>    | Ca_Kabuli_denovo             | 19721704                       | (G/A)       |
| 23035       | CakSNP23035    | <i>Kabuli</i>    | Ca_Kabuli_denovo             | 19721717                       | (C/T)       |
| 23036       | CakSNP23036    | <i>Kabuli</i>    | Ca_Kabuli_denovo             | 19728777                       | (G/A)       |
| 23037       | CakSNP23037    | <i>Kabuli</i>    | Ca_Kabuli_denovo             | 19728792                       | (A/G)       |
| 23038       | CakSNP23038    | <i>Kabuli</i>    | Ca_Kabuli_denovo             | 19731087                       | (C/G)       |
| 23039       | CakSNP23039    | <i>Kabuli</i>    | Ca_Kabuli_denovo             | 19734795                       | (G/A)       |
| 23040       | CakSNP23040    | <i>Kabuli</i>    | Ca_Kabuli_denovo             | 19734828                       | (C/G)       |
| 23041       | CakSNP23041    | <i>Kabuli</i>    | Ca_Kabuli_denovo             | 19738169                       | (A/C)       |
| 23042       | CakSNP23042    | <i>Kabuli</i>    | Ca_Kabuli_denovo             | 19741005                       | (T/G)       |
| 23043       | CakSNP23043    | <i>Kabuli</i>    | Ca_Kabuli_denovo             | 19744691                       | (C/T)       |
| 23044       | CakSNP23044    | <i>Kabuli</i>    | Ca_Kabuli_denovo             | 19750612                       | (G/A)       |
| 23045       | CakSNP23045    | <i>Kabuli</i>    | Ca_Kabuli_denovo             | 19756173                       | (A/G)       |
| 23046       | CakSNP23046    | <i>Kabuli</i>    | Ca_Kabuli_denovo             | 19761671                       | (G/A)       |
| 23047       | CakSNP23047    | <i>Kabuli</i>    | Ca_Kabuli_denovo             | 19761695                       | (A/T)       |
| 23048       | CakSNP23048    | <i>Kabuli</i>    | Ca_Kabuli_denovo             | 19762343                       | (C/T)       |
| 23049       | CakSNP23049    | <i>Kabuli</i>    | Ca_Kabuli_denovo             | 19762346                       | (T/C)       |
| 23050       | CakSNP23050    | <i>Kabuli</i>    | Ca_Kabuli_denovo             | 19764134                       | (G/C)       |
| 23051       | CakSNP23051    | <i>Kabuli</i>    | Ca_Kabuli_denovo             | 19769234                       | (G/T)       |
| 23052       | CakSNP23052    | <i>Kabuli</i>    | Ca_Kabuli_denovo             | 19774332                       | (C/T)       |
| 23053       | CakSNP23053    | <i>Kabuli</i>    | Ca_Kabuli_denovo             | 19776405                       | (T/G)       |
| 23054       | CakSNP23054    | <i>Kabuli</i>    | Ca_Kabuli_denovo             | 19776889                       | (T/G)       |
| 23055       | CakSNP23055    | <i>Kabuli</i>    | Ca_Kabuli_denovo             | 19781120                       | (C/T)       |
| 23056       | CakSNP23056    | <i>Kabuli</i>    | Ca_Kabuli_denovo             | 19788782                       | (A/G)       |
| 23057       | CakSNP23057    | <i>Kabuli</i>    | Ca_Kabuli_denovo             | 19788806                       | (C/G)       |
| 23058       | CakSNP23058    | <i>Kabuli</i>    | Ca_Kabuli_denovo             | 19793263                       | (G/A)       |
| 23059       | CakSNP23059    | <i>Kabuli</i>    | Ca_Kabuli_denovo             | 19794417                       | (A/G)       |
| 23060       | CakSNP23060    | <i>Kabuli</i>    | Ca_Kabuli_denovo             | 19797482                       | (C/T)       |
| 23061       | CakSNP23061    | <i>Kabuli</i>    | Ca_Kabuli_denovo             | 19797497                       | (T/C)       |
| 23062       | CakSNP23062    | <i>Kabuli</i>    | Ca_Kabuli_denovo             | 19806614                       | (T/G)       |
| 23063       | CakSNP23063    | <i>Kabuli</i>    | Ca_Kabuli_denovo             | 19806651                       | (G/C)       |
| 23064       | CakSNP23064    | <i>Kabuli</i>    | Ca_Kabuli_denovo             | 19808095                       | (A/C)       |
| 23065       | CakSNP23065    | <i>Kabuli</i>    | Ca_Kabuli_denovo             | 19808101                       | (A/G)       |

| <b>S.N.</b> | <b>SNP IDs</b> | <b>Cultivars</b> | <b>Chromosomes/scaffolds</b> | <b>Physical positions (bp)</b> | <b>SNPs</b> |
|-------------|----------------|------------------|------------------------------|--------------------------------|-------------|
| 23066       | CakSNP23066    | <i>Kabuli</i>    | Ca_Kabuli_denovo             | 19814186                       | (C/A)       |
| 23067       | CakSNP23067    | <i>Kabuli</i>    | Ca_Kabuli_denovo             | 19825655                       | (A/G)       |
| 23068       | CakSNP23068    | <i>Kabuli</i>    | Ca_Kabuli_denovo             | 19825684                       | (C/G)       |
| 23069       | CakSNP23069    | <i>Kabuli</i>    | Ca_Kabuli_denovo             | 19831346                       | (T/C)       |
| 23070       | CakSNP23070    | <i>Kabuli</i>    | Ca_Kabuli_denovo             | 19831394                       | (A/G)       |
| 23071       | CakSNP23071    | <i>Kabuli</i>    | Ca_Kabuli_denovo             | 19833191                       | (C/T)       |
| 23072       | CakSNP23072    | <i>Kabuli</i>    | Ca_Kabuli_denovo             | 19835711                       | (C/T)       |
| 23073       | CakSNP23073    | <i>Kabuli</i>    | Ca_Kabuli_denovo             | 19837847                       | (T/C)       |
| 23074       | CakSNP23074    | <i>Kabuli</i>    | Ca_Kabuli_denovo             | 19837862                       | (C/A)       |
| 23075       | CakSNP23075    | <i>Kabuli</i>    | Ca_Kabuli_denovo             | 19838759                       | (T/C)       |
| 23076       | CakSNP23076    | <i>Kabuli</i>    | Ca_Kabuli_denovo             | 19842335                       | (T/G)       |
| 23077       | CakSNP23077    | <i>Kabuli</i>    | Ca_Kabuli_denovo             | 19842348                       | (G/A)       |
| 23078       | CakSNP23078    | <i>Kabuli</i>    | Ca_Kabuli_denovo             | 19848450                       | (G/C)       |
| 23079       | CakSNP23079    | <i>Kabuli</i>    | Ca_Kabuli_denovo             | 19848471                       | (T/C)       |
| 23080       | CakSNP23080    | <i>Kabuli</i>    | Ca_Kabuli_denovo             | 19852642                       | (C/T)       |
| 23081       | CakSNP23081    | <i>Kabuli</i>    | Ca_Kabuli_denovo             | 19852670                       | (C/G)       |
| 23082       | CakSNP23082    | <i>Kabuli</i>    | Ca_Kabuli_denovo             | 19857655                       | (C/T)       |
| 23083       | CakSNP23083    | <i>Kabuli</i>    | Ca_Kabuli_denovo             | 19857667                       | (T/C)       |
| 23084       | CakSNP23084    | <i>Kabuli</i>    | Ca_Kabuli_denovo             | 19858311                       | (C/G)       |
| 23085       | CakSNP23085    | <i>Kabuli</i>    | Ca_Kabuli_denovo             | 19858321                       | (G/C)       |
| 23086       | CakSNP23086    | <i>Kabuli</i>    | Ca_Kabuli_denovo             | 19866905                       | (G/C)       |
| 23087       | CakSNP23087    | <i>Kabuli</i>    | Ca_Kabuli_denovo             | 19873840                       | (C/A)       |
| 23088       | CakSNP23088    | <i>Kabuli</i>    | Ca_Kabuli_denovo             | 19873946                       | (T/C)       |
| 23089       | CakSNP23089    | <i>Kabuli</i>    | Ca_Kabuli_denovo             | 19875607                       | (T/C)       |
| 23090       | CakSNP23090    | <i>Kabuli</i>    | Ca_Kabuli_denovo             | 19878301                       | (T/A)       |
| 23091       | CakSNP23091    | <i>Kabuli</i>    | Ca_Kabuli_denovo             | 19878370                       | (C/T)       |
| 23092       | CakSNP23092    | <i>Kabuli</i>    | Ca_Kabuli_denovo             | 19879644                       | (A/G)       |
| 23093       | CakSNP23093    | <i>Kabuli</i>    | Ca_Kabuli_denovo             | 19879658                       | (C/T)       |
| 23094       | CakSNP23094    | <i>Kabuli</i>    | Ca_Kabuli_denovo             | 19880110                       | (G/A)       |
| 23095       | CakSNP23095    | <i>Kabuli</i>    | Ca_Kabuli_denovo             | 19888886                       | (T/G)       |
| 23096       | CakSNP23096    | <i>Kabuli</i>    | Ca_Kabuli_denovo             | 19895426                       | (C/T)       |
| 23097       | CakSNP23097    | <i>Kabuli</i>    | Ca_Kabuli_denovo             | 19895429                       | (C/T)       |
| 23098       | CakSNP23098    | <i>Kabuli</i>    | Ca_Kabuli_denovo             | 19896219                       | (A/G)       |
| 23099       | CakSNP23099    | <i>Kabuli</i>    | Ca_Kabuli_denovo             | 19897592                       | (A/G)       |
| 23100       | CakSNP23100    | <i>Kabuli</i>    | Ca_Kabuli_denovo             | 19898670                       | (C/T)       |
| 23101       | CakSNP23101    | <i>Kabuli</i>    | Ca_Kabuli_denovo             | 19900442                       | (G/A)       |
| 23102       | CakSNP23102    | <i>Kabuli</i>    | Ca_Kabuli_denovo             | 19901441                       | (A/G)       |
| 23103       | CakSNP23103    | <i>Kabuli</i>    | Ca_Kabuli_denovo             | 19904162                       | (G/C)       |

| <b>S.N.</b> | <b>SNP IDs</b> | <b>Cultivars</b> | <b>Chromosomes/scaffolds</b> | <b>Physical positions (bp)</b> | <b>SNPs</b> |
|-------------|----------------|------------------|------------------------------|--------------------------------|-------------|
| 23104       | CakSNP23104    | <i>Kabuli</i>    | Ca_Kabuli_denovo             | 19906133                       | (C/T)       |
| 23105       | CakSNP23105    | <i>Kabuli</i>    | Ca_Kabuli_denovo             | 19906160                       | (C/G)       |
| 23106       | CakSNP23106    | <i>Kabuli</i>    | Ca_Kabuli_denovo             | 19913298                       | (A/G)       |
| 23107       | CakSNP23107    | <i>Kabuli</i>    | Ca_Kabuli_denovo             | 19913325                       | (T/G)       |
| 23108       | CakSNP23108    | <i>Kabuli</i>    | Ca_Kabuli_denovo             | 19917542                       | (T/C)       |
| 23109       | CakSNP23109    | <i>Kabuli</i>    | Ca_Kabuli_denovo             | 19917611                       | (T/G)       |
| 23110       | CakSNP23110    | <i>Kabuli</i>    | Ca_Kabuli_denovo             | 19917912                       | (C/T)       |
| 23111       | CakSNP23111    | <i>Kabuli</i>    | Ca_Kabuli_denovo             | 19917922                       | (G/A)       |
| 23112       | CakSNP23112    | <i>Kabuli</i>    | Ca_Kabuli_denovo             | 19919217                       | (T/C)       |
| 23113       | CakSNP23113    | <i>Kabuli</i>    | Ca_Kabuli_denovo             | 19919234                       | (G/C)       |
| 23114       | CakSNP23114    | <i>Kabuli</i>    | Ca_Kabuli_denovo             | 19921011                       | (C/A)       |
| 23115       | CakSNP23115    | <i>Kabuli</i>    | Ca_Kabuli_denovo             | 19921041                       | (A/G)       |
| 23116       | CakSNP23116    | <i>Kabuli</i>    | Ca_Kabuli_denovo             | 19926525                       | (G/C)       |
| 23117       | CakSNP23117    | <i>Kabuli</i>    | Ca_Kabuli_denovo             | 19931580                       | (C/A)       |
| 23118       | CakSNP23118    | <i>Kabuli</i>    | Ca_Kabuli_denovo             | 19931658                       | (C/G)       |
| 23119       | CakSNP23119    | <i>Kabuli</i>    | Ca_Kabuli_denovo             | 19937324                       | (G/A)       |
| 23120       | CakSNP23120    | <i>Kabuli</i>    | Ca_Kabuli_denovo             | 19937333                       | (G/C)       |
| 23121       | CakSNP23121    | <i>Kabuli</i>    | Ca_Kabuli_denovo             | 19938269                       | (C/T)       |
| 23122       | CakSNP23122    | <i>Kabuli</i>    | Ca_Kabuli_denovo             | 19942267                       | (A/C)       |
| 23123       | CakSNP23123    | <i>Kabuli</i>    | Ca_Kabuli_denovo             | 19945803                       | (G/T)       |
| 23124       | CakSNP23124    | <i>Kabuli</i>    | Ca_Kabuli_denovo             | 19948365                       | (C/G)       |
| 23125       | CakSNP23125    | <i>Kabuli</i>    | Ca_Kabuli_denovo             | 19948387                       | (C/A)       |
| 23126       | CakSNP23126    | <i>Kabuli</i>    | Ca_Kabuli_denovo             | 19948522                       | (C/T)       |
| 23127       | CakSNP23127    | <i>Kabuli</i>    | Ca_Kabuli_denovo             | 19948538                       | (T/A)       |
| 23128       | CakSNP23128    | <i>Kabuli</i>    | Ca_Kabuli_denovo             | 19952071                       | (T/A)       |
| 23129       | CakSNP23129    | <i>Kabuli</i>    | Ca_Kabuli_denovo             | 19953836                       | (C/T)       |
| 23130       | CakSNP23130    | <i>Kabuli</i>    | Ca_Kabuli_denovo             | 19953839                       | (T/G)       |
| 23131       | CakSNP23131    | <i>Kabuli</i>    | Ca_Kabuli_denovo             | 19954188                       | (C/G)       |
| 23132       | CakSNP23132    | <i>Kabuli</i>    | Ca_Kabuli_denovo             | 19955948                       | (G/C)       |
| 23133       | CakSNP23133    | <i>Kabuli</i>    | Ca_Kabuli_denovo             | 19956797                       | (C/T)       |
| 23134       | CakSNP23134    | <i>Kabuli</i>    | Ca_Kabuli_denovo             | 19958097                       | (C/G)       |
| 23135       | CakSNP23135    | <i>Kabuli</i>    | Ca_Kabuli_denovo             | 19958902                       | (A/G)       |
| 23136       | CakSNP23136    | <i>Kabuli</i>    | Ca_Kabuli_denovo             | 19963409                       | (G/A)       |
| 23137       | CakSNP23137    | <i>Kabuli</i>    | Ca_Kabuli_denovo             | 19968457                       | (G/A)       |
| 23138       | CakSNP23138    | <i>Kabuli</i>    | Ca_Kabuli_denovo             | 19975434                       | (T/A)       |
| 23139       | CakSNP23139    | <i>Kabuli</i>    | Ca_Kabuli_denovo             | 19975893                       | (G/A)       |
| 23140       | CakSNP23140    | <i>Kabuli</i>    | Ca_Kabuli_denovo             | 19975905                       | (G/C)       |
| 23141       | CakSNP23141    | <i>Kabuli</i>    | Ca_Kabuli_denovo             | 19984691                       | (C/T)       |

| <b>S.N.</b> | <b>SNP IDs</b> | <b>Cultivars</b> | <b>Chromosomes/scaffolds</b> | <b>Physical positions (bp)</b> | <b>SNPs</b> |
|-------------|----------------|------------------|------------------------------|--------------------------------|-------------|
| 23142       | CakSNP23142    | <i>Kabuli</i>    | Ca_Kabuli_denovo             | 19989240                       | (G/A)       |
| 23143       | CakSNP23143    | <i>Kabuli</i>    | Ca_Kabuli_denovo             | 19989273                       | (A/G)       |
| 23144       | CakSNP23144    | <i>Kabuli</i>    | Ca_Kabuli_denovo             | 19997189                       | (A/C)       |
| 23145       | CakSNP23145    | <i>Kabuli</i>    | Ca_Kabuli_denovo             | 19997192                       | (C/G)       |
| 23146       | CakSNP23146    | <i>Kabuli</i>    | Ca_Kabuli_denovo             | 19998340                       | (T/C)       |
| 23147       | CakSNP23147    | <i>Kabuli</i>    | Ca_Kabuli_denovo             | 20000681                       | (G/A)       |
| 23148       | CakSNP23148    | <i>Kabuli</i>    | Ca_Kabuli_denovo             | 20000697                       | (T/C)       |
| 23149       | CakSNP23149    | <i>Kabuli</i>    | Ca_Kabuli_denovo             | 20000708                       | (T/C)       |
| 23150       | CakSNP23150    | <i>Kabuli</i>    | Ca_Kabuli_denovo             | 20005079                       | (G/A)       |
| 23151       | CakSNP23151    | <i>Kabuli</i>    | Ca_Kabuli_denovo             | 20017910                       | (C/G)       |
| 23152       | CakSNP23152    | <i>Kabuli</i>    | Ca_Kabuli_denovo             | 20017928                       | (T/C)       |
| 23153       | CakSNP23153    | <i>Kabuli</i>    | Ca_Kabuli_denovo             | 20018908                       | (C/G)       |
| 23154       | CakSNP23154    | <i>Kabuli</i>    | Ca_Kabuli_denovo             | 20018920                       | (C/T)       |
| 23155       | CakSNP23155    | <i>Kabuli</i>    | Ca_Kabuli_denovo             | 20024896                       | (C/G)       |
| 23156       | CakSNP23156    | <i>Kabuli</i>    | Ca_Kabuli_denovo             | 20024947                       | (C/A)       |
| 23157       | CakSNP23157    | <i>Kabuli</i>    | Ca_Kabuli_denovo             | 20025608                       | (A/G)       |
| 23158       | CakSNP23158    | <i>Kabuli</i>    | Ca_Kabuli_denovo             | 20025654                       | (G/A)       |
| 23159       | CakSNP23159    | <i>Kabuli</i>    | Ca_Kabuli_denovo             | 20026305                       | (T/C)       |
| 23160       | CakSNP23160    | <i>Kabuli</i>    | Ca_Kabuli_denovo             | 20027451                       | (G/C)       |
| 23161       | CakSNP23161    | <i>Kabuli</i>    | Ca_Kabuli_denovo             | 20035598                       | (C/T)       |
| 23162       | CakSNP23162    | <i>Kabuli</i>    | Ca_Kabuli_denovo             | 20035633                       | (G/C)       |
| 23163       | CakSNP23163    | <i>Kabuli</i>    | Ca_Kabuli_denovo             | 20038648                       | (G/C)       |
| 23164       | CakSNP23164    | <i>Kabuli</i>    | Ca_Kabuli_denovo             | 20038704                       | (A/G)       |
| 23165       | CakSNP23165    | <i>Kabuli</i>    | Ca_Kabuli_denovo             | 20040215                       | (T/A)       |
| 23166       | CakSNP23166    | <i>Kabuli</i>    | Ca_Kabuli_denovo             | 20042344                       | (T/C)       |
| 23167       | CakSNP23167    | <i>Kabuli</i>    | Ca_Kabuli_denovo             | 20044804                       | (C/G)       |
| 23168       | CakSNP23168    | <i>Kabuli</i>    | Ca_Kabuli_denovo             | 20044831                       | (C/T)       |
| 23169       | CakSNP23169    | <i>Kabuli</i>    | Ca_Kabuli_denovo             | 20048966                       | (G/A)       |
| 23170       | CakSNP23170    | <i>Kabuli</i>    | Ca_Kabuli_denovo             | 20056233                       | (G/C)       |
| 23171       | CakSNP23171    | <i>Kabuli</i>    | Ca_Kabuli_denovo             | 20063573                       | (G/A)       |
| 23172       | CakSNP23172    | <i>Kabuli</i>    | Ca_Kabuli_denovo             | 20068026                       | (G/C)       |
| 23173       | CakSNP23173    | <i>Kabuli</i>    | Ca_Kabuli_denovo             | 20069077                       | (C/G)       |
| 23174       | CakSNP23174    | <i>Kabuli</i>    | Ca_Kabuli_denovo             | 20074843                       | (C/A)       |
| 23175       | CakSNP23175    | <i>Kabuli</i>    | Ca_Kabuli_denovo             | 20078987                       | (G/T)       |
| 23176       | CakSNP23176    | <i>Kabuli</i>    | Ca_Kabuli_denovo             | 20081620                       | (C/A)       |
| 23177       | CakSNP23177    | <i>Kabuli</i>    | Ca_Kabuli_denovo             | 20083394                       | (T/A)       |
| 23178       | CakSNP23178    | <i>Kabuli</i>    | Ca_Kabuli_denovo             | 20083396                       | (T/C)       |
| 23179       | CakSNP23179    | <i>Kabuli</i>    | Ca_Kabuli_denovo             | 20085531                       | (T/C)       |

| <b>S.N.</b> | <b>SNP IDs</b> | <b>Cultivars</b> | <b>Chromosomes/scaffolds</b> | <b>Physical positions (bp)</b> | <b>SNPs</b> |
|-------------|----------------|------------------|------------------------------|--------------------------------|-------------|
| 23180       | CakSNP23180    | <i>Kabuli</i>    | Ca_Kabuli_denovo             | 20085546                       | (G/T)       |
| 23181       | CakSNP23181    | <i>Kabuli</i>    | Ca_Kabuli_denovo             | 20087213                       | (T/C)       |
| 23182       | CakSNP23182    | <i>Kabuli</i>    | Ca_Kabuli_denovo             | 20087214                       | (T/G)       |
| 23183       | CakSNP23183    | <i>Kabuli</i>    | Ca_Kabuli_denovo             | 20101340                       | (C/G)       |
| 23184       | CakSNP23184    | <i>Kabuli</i>    | Ca_Kabuli_denovo             | 20104647                       | (A/C)       |
| 23185       | CakSNP23185    | <i>Kabuli</i>    | Ca_Kabuli_denovo             | 20104648                       | (G/C)       |
| 23186       | CakSNP23186    | <i>Kabuli</i>    | Ca_Kabuli_denovo             | 20110626                       | (G/T)       |
| 23187       | CakSNP23187    | <i>Kabuli</i>    | Ca_Kabuli_denovo             | 20110644                       | (C/T)       |
| 23188       | CakSNP23188    | <i>Kabuli</i>    | Ca_Kabuli_denovo             | 20116483                       | (C/T)       |
| 23189       | CakSNP23189    | <i>Kabuli</i>    | Ca_Kabuli_denovo             | 20119877                       | (A/G)       |
| 23190       | CakSNP23190    | <i>Kabuli</i>    | Ca_Kabuli_denovo             | 20123545                       | (T/C)       |
| 23191       | CakSNP23191    | <i>Kabuli</i>    | Ca_Kabuli_denovo             | 20123553                       | (A/G)       |
| 23192       | CakSNP23192    | <i>Kabuli</i>    | Ca_Kabuli_denovo             | 20126594                       | (T/G)       |
| 23193       | CakSNP23193    | <i>Kabuli</i>    | Ca_Kabuli_denovo             | 20126610                       | (G/C)       |
| 23194       | CakSNP23194    | <i>Kabuli</i>    | Ca_Kabuli_denovo             | 20129287                       | (A/G)       |
| 23195       | CakSNP23195    | <i>Kabuli</i>    | Ca_Kabuli_denovo             | 20129288                       | (A/T)       |
| 23196       | CakSNP23196    | <i>Kabuli</i>    | Ca_Kabuli_denovo             | 20129305                       | (C/G)       |
| 23197       | CakSNP23197    | <i>Kabuli</i>    | Ca_Kabuli_denovo             | 20131006                       | (G/A)       |
| 23198       | CakSNP23198    | <i>Kabuli</i>    | Ca_Kabuli_denovo             | 20131170                       | (A/T)       |
| 23199       | CakSNP23199    | <i>Kabuli</i>    | Ca_Kabuli_denovo             | 20134798                       | (A/C)       |
| 23200       | CakSNP23200    | <i>Kabuli</i>    | Ca_Kabuli_denovo             | 20136511                       | (A/G)       |
| 23201       | CakSNP23201    | <i>Kabuli</i>    | Ca_Kabuli_denovo             | 20137771                       | (G/A)       |
| 23202       | CakSNP23202    | <i>Kabuli</i>    | Ca_Kabuli_denovo             | 20141248                       | (C/G)       |
| 23203       | CakSNP23203    | <i>Kabuli</i>    | Ca_Kabuli_denovo             | 20142644                       | (G/A)       |
| 23204       | CakSNP23204    | <i>Kabuli</i>    | Ca_Kabuli_denovo             | 20145625                       | (A/G)       |
| 23205       | CakSNP23205    | <i>Kabuli</i>    | Ca_Kabuli_denovo             | 20145669                       | (C/G)       |
| 23206       | CakSNP23206    | <i>Kabuli</i>    | Ca_Kabuli_denovo             | 20145687                       | (G/T)       |
| 23207       | CakSNP23207    | <i>Kabuli</i>    | Ca_Kabuli_denovo             | 20150919                       | (C/T)       |
| 23208       | CakSNP23208    | <i>Kabuli</i>    | Ca_Kabuli_denovo             | 20152100                       | (A/T)       |
| 23209       | CakSNP23209    | <i>Kabuli</i>    | Ca_Kabuli_denovo             | 20156472                       | (T/C)       |
| 23210       | CakSNP23210    | <i>Kabuli</i>    | Ca_Kabuli_denovo             | 20157125                       | (G/A)       |
| 23211       | CakSNP23211    | <i>Kabuli</i>    | Ca_Kabuli_denovo             | 20157152                       | (T/C)       |
| 23212       | CakSNP23212    | <i>Kabuli</i>    | Ca_Kabuli_denovo             | 20158810                       | (T/C)       |
| 23213       | CakSNP23213    | <i>Kabuli</i>    | Ca_Kabuli_denovo             | 20159644                       | (T/C)       |
| 23214       | CakSNP23214    | <i>Kabuli</i>    | Ca_Kabuli_denovo             | 20159683                       | (G/T)       |
| 23215       | CakSNP23215    | <i>Kabuli</i>    | Ca_Kabuli_denovo             | 20161993                       | (T/C)       |
| 23216       | CakSNP23216    | <i>Kabuli</i>    | Ca_Kabuli_denovo             | 20162803                       | (C/T)       |
| 23217       | CakSNP23217    | <i>Kabuli</i>    | Ca_Kabuli_denovo             | 20162851                       | (C/T)       |

| <b>S.N.</b> | <b>SNP IDs</b> | <b>Cultivars</b> | <b>Chromosomes/scaffolds</b> | <b>Physical positions (bp)</b> | <b>SNPs</b> |
|-------------|----------------|------------------|------------------------------|--------------------------------|-------------|
| 23218       | CakSNP23218    | <i>Kabuli</i>    | Ca_Kabuli_denovo             | 20164653                       | (T/C)       |
| 23219       | CakSNP23219    | <i>Kabuli</i>    | Ca_Kabuli_denovo             | 20164656                       | (G/A)       |
| 23220       | CakSNP23220    | <i>Kabuli</i>    | Ca_Kabuli_denovo             | 20170406                       | (A/G)       |
| 23221       | CakSNP23221    | <i>Kabuli</i>    | Ca_Kabuli_denovo             | 20170473                       | (A/C)       |
| 23222       | CakSNP23222    | <i>Kabuli</i>    | Ca_Kabuli_denovo             | 20180858                       | (T/G)       |
| 23223       | CakSNP23223    | <i>Kabuli</i>    | Ca_Kabuli_denovo             | 20194916                       | (G/C)       |
| 23224       | CakSNP23224    | <i>Kabuli</i>    | Ca_Kabuli_denovo             | 20194934                       | (A/C)       |
| 23225       | CakSNP23225    | <i>Kabuli</i>    | Ca_Kabuli_denovo             | 20196346                       | (T/C)       |
| 23226       | CakSNP23226    | <i>Kabuli</i>    | Ca_Kabuli_denovo             | 20200393                       | (T/C)       |
| 23227       | CakSNP23227    | <i>Kabuli</i>    | Ca_Kabuli_denovo             | 20202734                       | (A/T)       |
| 23228       | CakSNP23228    | <i>Kabuli</i>    | Ca_Kabuli_denovo             | 20202761                       | (A/G)       |
| 23229       | CakSNP23229    | <i>Kabuli</i>    | Ca_Kabuli_denovo             | 20212724                       | (A/G)       |
| 23230       | CakSNP23230    | <i>Kabuli</i>    | Ca_Kabuli_denovo             | 20212763                       | (G/A)       |
| 23231       | CakSNP23231    | <i>Kabuli</i>    | Ca_Kabuli_denovo             | 20219887                       | (G/A)       |
| 23232       | CakSNP23232    | <i>Kabuli</i>    | Ca_Kabuli_denovo             | 20220084                       | (G/A)       |
| 23233       | CakSNP23233    | <i>Kabuli</i>    | Ca_Kabuli_denovo             | 20220098                       | (C/G)       |
| 23234       | CakSNP23234    | <i>Kabuli</i>    | Ca_Kabuli_denovo             | 20230591                       | (C/T)       |
| 23235       | CakSNP23235    | <i>Kabuli</i>    | Ca_Kabuli_denovo             | 20230657                       | (C/T)       |
| 23236       | CakSNP23236    | <i>Kabuli</i>    | Ca_Kabuli_denovo             | 20236388                       | (A/G)       |
| 23237       | CakSNP23237    | <i>Kabuli</i>    | Ca_Kabuli_denovo             | 20240633                       | (T/G)       |
| 23238       | CakSNP23238    | <i>Kabuli</i>    | Ca_Kabuli_denovo             | 20240645                       | (C/G)       |
| 23239       | CakSNP23239    | <i>Kabuli</i>    | Ca_Kabuli_denovo             | 20241466                       | (T/C)       |
| 23240       | CakSNP23240    | <i>Kabuli</i>    | Ca_Kabuli_denovo             | 20241469                       | (G/A)       |
| 23241       | CakSNP23241    | <i>Kabuli</i>    | Ca_Kabuli_denovo             | 20244579                       | (G/A)       |
| 23242       | CakSNP23242    | <i>Kabuli</i>    | Ca_Kabuli_denovo             | 20249119                       | (C/A)       |
| 23243       | CakSNP23243    | <i>Kabuli</i>    | Ca_Kabuli_denovo             | 20249316                       | (T/C)       |
| 23244       | CakSNP23244    | <i>Kabuli</i>    | Ca_Kabuli_denovo             | 20249645                       | (T/C)       |
| 23245       | CakSNP23245    | <i>Kabuli</i>    | Ca_Kabuli_denovo             | 20249668                       | (C/A)       |
| 23246       | CakSNP23246    | <i>Kabuli</i>    | Ca_Kabuli_denovo             | 20257527                       | (C/G)       |
| 23247       | CakSNP23247    | <i>Kabuli</i>    | Ca_Kabuli_denovo             | 20257528                       | (G/A)       |
| 23248       | CakSNP23248    | <i>Kabuli</i>    | Ca_Kabuli_denovo             | 20260076                       | (C/G)       |
| 23249       | CakSNP23249    | <i>Kabuli</i>    | Ca_Kabuli_denovo             | 20260108                       | (G/A)       |
| 23250       | CakSNP23250    | <i>Kabuli</i>    | Ca_Kabuli_denovo             | 20264839                       | (T/C)       |
| 23251       | CakSNP23251    | <i>Kabuli</i>    | Ca_Kabuli_denovo             | 20269376                       | (C/T)       |
| 23252       | CakSNP23252    | <i>Kabuli</i>    | Ca_Kabuli_denovo             | 20269682                       | (T/G)       |
| 23253       | CakSNP23253    | <i>Kabuli</i>    | Ca_Kabuli_denovo             | 20272800                       | (A/C)       |
| 23254       | CakSNP23254    | <i>Kabuli</i>    | Ca_Kabuli_denovo             | 20272866                       | (C/G)       |
| 23255       | CakSNP23255    | <i>Kabuli</i>    | Ca_Kabuli_denovo             | 20274219                       | (C/T)       |

| <b>S.N.</b> | <b>SNP IDs</b> | <b>Cultivars</b> | <b>Chromosomes/scaffolds</b> | <b>Physical positions (bp)</b> | <b>SNPs</b> |
|-------------|----------------|------------------|------------------------------|--------------------------------|-------------|
| 23256       | CakSNP23256    | <i>Kabuli</i>    | Ca_Kabuli_denovo             | 20281838                       | (T/G)       |
| 23257       | CakSNP23257    | <i>Kabuli</i>    | Ca_Kabuli_denovo             | 20283791                       | (G/A)       |
| 23258       | CakSNP23258    | <i>Kabuli</i>    | Ca_Kabuli_denovo             | 20286365                       | (C/T)       |
| 23259       | CakSNP23259    | <i>Kabuli</i>    | Ca_Kabuli_denovo             | 20286656                       | (G/A)       |
| 23260       | CakSNP23260    | <i>Kabuli</i>    | Ca_Kabuli_denovo             | 20287498                       | (C/T)       |
| 23261       | CakSNP23261    | <i>Kabuli</i>    | Ca_Kabuli_denovo             | 20287522                       | (T/C)       |
| 23262       | CakSNP23262    | <i>Kabuli</i>    | Ca_Kabuli_denovo             | 20295694                       | (T/C)       |
| 23263       | CakSNP23263    | <i>Kabuli</i>    | Ca_Kabuli_denovo             | 20295877                       | (A/G)       |
| 23264       | CakSNP23264    | <i>Kabuli</i>    | Ca_Kabuli_denovo             | 20297276                       | (C/G)       |
| 23265       | CakSNP23265    | <i>Kabuli</i>    | Ca_Kabuli_denovo             | 20297287                       | (T/C)       |
| 23266       | CakSNP23266    | <i>Kabuli</i>    | Ca_Kabuli_denovo             | 20304659                       | (G/C)       |
| 23267       | CakSNP23267    | <i>Kabuli</i>    | Ca_Kabuli_denovo             | 20307614                       | (C/T)       |
| 23268       | CakSNP23268    | <i>Kabuli</i>    | Ca_Kabuli_denovo             | 20308015                       | (C/T)       |
| 23269       | CakSNP23269    | <i>Kabuli</i>    | Ca_Kabuli_denovo             | 20309478                       | (T/C)       |
| 23270       | CakSNP23270    | <i>Kabuli</i>    | Ca_Kabuli_denovo             | 20309524                       | (C/T)       |
| 23271       | CakSNP23271    | <i>Kabuli</i>    | Ca_Kabuli_denovo             | 20309582                       | (A/C)       |
| 23272       | CakSNP23272    | <i>Kabuli</i>    | Ca_Kabuli_denovo             | 20313491                       | (T/C)       |
| 23273       | CakSNP23273    | <i>Kabuli</i>    | Ca_Kabuli_denovo             | 20317455                       | (G/T)       |
| 23274       | CakSNP23274    | <i>Kabuli</i>    | Ca_Kabuli_denovo             | 20318783                       | (C/T)       |
| 23275       | CakSNP23275    | <i>Kabuli</i>    | Ca_Kabuli_denovo             | 20319883                       | (T/G)       |
| 23276       | CakSNP23276    | <i>Kabuli</i>    | Ca_Kabuli_denovo             | 20321059                       | (T/G)       |
| 23277       | CakSNP23277    | <i>Kabuli</i>    | Ca_Kabuli_denovo             | 20333539                       | (G/T)       |
| 23278       | CakSNP23278    | <i>Kabuli</i>    | Ca_Kabuli_denovo             | 20333593                       | (G/C)       |
| 23279       | CakSNP23279    | <i>Kabuli</i>    | Ca_Kabuli_denovo             | 20338885                       | (G/A)       |
| 23280       | CakSNP23280    | <i>Kabuli</i>    | Ca_Kabuli_denovo             | 20339572                       | (A/T)       |
| 23281       | CakSNP23281    | <i>Kabuli</i>    | Ca_Kabuli_denovo             | 20355762                       | (C/T)       |
| 23282       | CakSNP23282    | <i>Kabuli</i>    | Ca_Kabuli_denovo             | 20359839                       | (A/G)       |
| 23283       | CakSNP23283    | <i>Kabuli</i>    | Ca_Kabuli_denovo             | 20360563                       | (C/T)       |
| 23284       | CakSNP23284    | <i>Kabuli</i>    | Ca_Kabuli_denovo             | 20362457                       | (C/T)       |
| 23285       | CakSNP23285    | <i>Kabuli</i>    | Ca_Kabuli_denovo             | 20367494                       | (C/T)       |
| 23286       | CakSNP23286    | <i>Kabuli</i>    | Ca_Kabuli_denovo             | 20368379                       | (A/T)       |
| 23287       | CakSNP23287    | <i>Kabuli</i>    | Ca_Kabuli_denovo             | 20370821                       | (T/C)       |
| 23288       | CakSNP23288    | <i>Kabuli</i>    | Ca_Kabuli_denovo             | 20375797                       | (A/G)       |
| 23289       | CakSNP23289    | <i>Kabuli</i>    | Ca_Kabuli_denovo             | 20375808                       | (G/A)       |
| 23290       | CakSNP23290    | <i>Kabuli</i>    | Ca_Kabuli_denovo             | 20380039                       | (G/C)       |
| 23291       | CakSNP23291    | <i>Kabuli</i>    | Ca_Kabuli_denovo             | 20386266                       | (G/A)       |
| 23292       | CakSNP23292    | <i>Kabuli</i>    | Ca_Kabuli_denovo             | 20386332                       | (A/G)       |
| 23293       | CakSNP23293    | <i>Kabuli</i>    | Ca_Kabuli_denovo             | 20393328                       | (C/T)       |

| <b>S.N.</b> | <b>SNP IDs</b> | <b>Cultivars</b> | <b>Chromosomes/scaffolds</b> | <b>Physical positions (bp)</b> | <b>SNPs</b> |
|-------------|----------------|------------------|------------------------------|--------------------------------|-------------|
| 23294       | CakSNP23294    | <i>Kabuli</i>    | Ca_Kabuli_denovo             | 20396493                       | (A/G)       |
| 23295       | CakSNP23295    | <i>Kabuli</i>    | Ca_Kabuli_denovo             | 20407673                       | (G/C)       |
| 23296       | CakSNP23296    | <i>Kabuli</i>    | Ca_Kabuli_denovo             | 20407694                       | (C/G)       |
| 23297       | CakSNP23297    | <i>Kabuli</i>    | Ca_Kabuli_denovo             | 20411690                       | (A/G)       |
| 23298       | CakSNP23298    | <i>Kabuli</i>    | Ca_Kabuli_denovo             | 20416894                       | (G/A)       |
| 23299       | CakSNP23299    | <i>Kabuli</i>    | Ca_Kabuli_denovo             | 20416922                       | (T/C)       |
| 23300       | CakSNP23300    | <i>Kabuli</i>    | Ca_Kabuli_denovo             | 20418994                       | (G/A)       |
| 23301       | CakSNP23301    | <i>Kabuli</i>    | Ca_Kabuli_denovo             | 20424469                       | (A/G)       |
| 23302       | CakSNP23302    | <i>Kabuli</i>    | Ca_Kabuli_denovo             | 20424475                       | (T/G)       |
| 23303       | CakSNP23303    | <i>Kabuli</i>    | Ca_Kabuli_denovo             | 20426830                       | (C/G)       |
| 23304       | CakSNP23304    | <i>Kabuli</i>    | Ca_Kabuli_denovo             | 20426890                       | (G/C)       |
| 23305       | CakSNP23305    | <i>Kabuli</i>    | Ca_Kabuli_denovo             | 20450527                       | (C/T)       |
| 23306       | CakSNP23306    | <i>Kabuli</i>    | Ca_Kabuli_denovo             | 20450551                       | (T/C)       |
| 23307       | CakSNP23307    | <i>Kabuli</i>    | Ca_Kabuli_denovo             | 20462740                       | (T/C)       |
| 23308       | CakSNP23308    | <i>Kabuli</i>    | Ca_Kabuli_denovo             | 20463827                       | (T/C)       |
| 23309       | CakSNP23309    | <i>Kabuli</i>    | Ca_Kabuli_denovo             | 20463839                       | (C/T)       |
| 23310       | CakSNP23310    | <i>Kabuli</i>    | Ca_Kabuli_denovo             | 20464124                       | (C/T)       |
| 23311       | CakSNP23311    | <i>Kabuli</i>    | Ca_Kabuli_denovo             | 20464330                       | (G/T)       |
| 23312       | CakSNP23312    | <i>Kabuli</i>    | Ca_Kabuli_denovo             | 20464352                       | (G/A)       |
| 23313       | CakSNP23313    | <i>Kabuli</i>    | Ca_Kabuli_denovo             | 20466839                       | (C/T)       |
| 23314       | CakSNP23314    | <i>Kabuli</i>    | Ca_Kabuli_denovo             | 20471359                       | (G/C)       |
| 23315       | CakSNP23315    | <i>Kabuli</i>    | Ca_Kabuli_denovo             | 20473596                       | (G/A)       |
| 23316       | CakSNP23316    | <i>Kabuli</i>    | Ca_Kabuli_denovo             | 20473597                       | (T/C)       |
| 23317       | CakSNP23317    | <i>Kabuli</i>    | Ca_Kabuli_denovo             | 20474659                       | (A/G)       |
| 23318       | CakSNP23318    | <i>Kabuli</i>    | Ca_Kabuli_denovo             | 20474660                       | (G/A)       |
| 23319       | CakSNP23319    | <i>Kabuli</i>    | Ca_Kabuli_denovo             | 20486435                       | (C/A)       |
| 23320       | CakSNP23320    | <i>Kabuli</i>    | Ca_Kabuli_denovo             | 20486468                       | (A/G)       |
| 23321       | CakSNP23321    | <i>Kabuli</i>    | Ca_Kabuli_denovo             | 20490102                       | (C/A)       |
| 23322       | CakSNP23322    | <i>Kabuli</i>    | Ca_Kabuli_denovo             | 20501163                       | (C/T)       |
| 23323       | CakSNP23323    | <i>Kabuli</i>    | Ca_Kabuli_denovo             | 20511427                       | (A/C)       |
| 23324       | CakSNP23324    | <i>Kabuli</i>    | Ca_Kabuli_denovo             | 20511808                       | (G/A)       |
| 23325       | CakSNP23325    | <i>Kabuli</i>    | Ca_Kabuli_denovo             | 20516470                       | (C/T)       |
| 23326       | CakSNP23326    | <i>Kabuli</i>    | Ca_Kabuli_denovo             | 20517433                       | (C/T)       |
| 23327       | CakSNP23327    | <i>Kabuli</i>    | Ca_Kabuli_denovo             | 20522644                       | (C/T)       |
| 23328       | CakSNP23328    | <i>Kabuli</i>    | Ca_Kabuli_denovo             | 20522665                       | (T/A)       |
| 23329       | CakSNP23329    | <i>Kabuli</i>    | Ca_Kabuli_denovo             | 20541587                       | (C/G)       |
| 23330       | CakSNP23330    | <i>Kabuli</i>    | Ca_Kabuli_denovo             | 20542211                       | (A/G)       |
| 23331       | CakSNP23331    | <i>Kabuli</i>    | Ca_Kabuli_denovo             | 20546414                       | (A/G)       |



| <b>S.N.</b> | <b>SNP IDs</b> | <b>Cultivars</b> | <b>Chromosomes/scaffolds</b> | <b>Physical positions (bp)</b> | <b>SNPs</b> |
|-------------|----------------|------------------|------------------------------|--------------------------------|-------------|
| 23332       | CakSNP23332    | <i>Kabuli</i>    | Ca_Kabuli_denovo             | 20546702                       | (G/A)       |
| 23333       | CakSNP23333    | <i>Kabuli</i>    | Ca_Kabuli_denovo             | 20546714                       | (G/A)       |
| 23334       | CakSNP23334    | <i>Kabuli</i>    | Ca_Kabuli_denovo             | 20549051                       | (C/G)       |
| 23335       | CakSNP23335    | <i>Kabuli</i>    | Ca_Kabuli_denovo             | 20554469                       | (G/T)       |
| 23336       | CakSNP23336    | <i>Kabuli</i>    | Ca_Kabuli_denovo             | 20555467                       | (T/G)       |
| 23337       | CakSNP23337    | <i>Kabuli</i>    | Ca_Kabuli_denovo             | 20555488                       | (T/C)       |
| 23338       | CakSNP23338    | <i>Kabuli</i>    | Ca_Kabuli_denovo             | 20567620                       | (G/T)       |
| 23339       | CakSNP23339    | <i>Kabuli</i>    | Ca_Kabuli_denovo             | 20567674                       | (G/C)       |
| 23340       | CakSNP23340    | <i>Kabuli</i>    | Ca_Kabuli_denovo             | 20568646                       | (A/G)       |
| 23341       | CakSNP23341    | <i>Kabuli</i>    | Ca_Kabuli_denovo             | 20569289                       | (G/A)       |
| 23342       | CakSNP23342    | <i>Kabuli</i>    | Ca_Kabuli_denovo             | 20571818                       | (T/C)       |
| 23343       | CakSNP23343    | <i>Kabuli</i>    | Ca_Kabuli_denovo             | 20571867                       | (C/A)       |
| 23344       | CakSNP23344    | <i>Kabuli</i>    | Ca_Kabuli_denovo             | 20577212                       | (G/A)       |
| 23345       | CakSNP23345    | <i>Kabuli</i>    | Ca_Kabuli_denovo             | 20577218                       | (C/T)       |
| 23346       | CakSNP23346    | <i>Kabuli</i>    | Ca_Kabuli_denovo             | 20581578                       | (G/A)       |
| 23347       | CakSNP23347    | <i>Kabuli</i>    | Ca_Kabuli_denovo             | 20584509                       | (T/C)       |
| 23348       | CakSNP23348    | <i>Kabuli</i>    | Ca_Kabuli_denovo             | 20588181                       | (G/C)       |
| 23349       | CakSNP23349    | <i>Kabuli</i>    | Ca_Kabuli_denovo             | 20588184                       | (T/C)       |
| 23350       | CakSNP23350    | <i>Kabuli</i>    | Ca_Kabuli_denovo             | 20588933                       | (A/G)       |
| 23351       | CakSNP23351    | <i>Kabuli</i>    | Ca_Kabuli_denovo             | 20588955                       | (C/T)       |
| 23352       | CakSNP23352    | <i>Kabuli</i>    | Ca_Kabuli_denovo             | 20591069                       | (C/T)       |
| 23353       | CakSNP23353    | <i>Kabuli</i>    | Ca_Kabuli_denovo             | 20591637                       | (G/A)       |
| 23354       | CakSNP23354    | <i>Kabuli</i>    | Ca_Kabuli_denovo             | 20591679                       | (C/G)       |
| 23355       | CakSNP23355    | <i>Kabuli</i>    | Ca_Kabuli_denovo             | 20597291                       | (C/T)       |
| 23356       | CakSNP23356    | <i>Kabuli</i>    | Ca_Kabuli_denovo             | 20603510                       | (C/G)       |
| 23357       | CakSNP23357    | <i>Kabuli</i>    | Ca_Kabuli_denovo             | 20608014                       | (T/C)       |
| 23358       | CakSNP23358    | <i>Kabuli</i>    | Ca_Kabuli_denovo             | 20608016                       | (G/C)       |
| 23359       | CakSNP23359    | <i>Kabuli</i>    | Ca_Kabuli_denovo             | 20608286                       | (G/A)       |
| 23360       | CakSNP23360    | <i>Kabuli</i>    | Ca_Kabuli_denovo             | 20608691                       | (A/G)       |
| 23361       | CakSNP23361    | <i>Kabuli</i>    | Ca_Kabuli_denovo             | 20610844                       | (G/A)       |
| 23362       | CakSNP23362    | <i>Kabuli</i>    | Ca_Kabuli_denovo             | 20618225                       | (C/A)       |
| 23363       | CakSNP23363    | <i>Kabuli</i>    | Ca_Kabuli_denovo             | 20620363                       | (T/C)       |
| 23364       | CakSNP23364    | <i>Kabuli</i>    | Ca_Kabuli_denovo             | 20621301                       | (A/G)       |
| 23365       | CakSNP23365    | <i>Kabuli</i>    | Ca_Kabuli_denovo             | 20622012                       | (G/A)       |
| 23366       | CakSNP23366    | <i>Kabuli</i>    | Ca_Kabuli_denovo             | 20624246                       | (T/C)       |
| 23367       | CakSNP23367    | <i>Kabuli</i>    | Ca_Kabuli_denovo             | 20624249                       | (A/G)       |
| 23368       | CakSNP23368    | <i>Kabuli</i>    | Ca_Kabuli_denovo             | 20626274                       | (T/C)       |
| 23369       | CakSNP23369    | <i>Kabuli</i>    | Ca_Kabuli_denovo             | 20626284                       | (G/A)       |

| <b>S.N.</b> | <b>SNP IDs</b> | <b>Cultivars</b> | <b>Chromosomes/scaffolds</b> | <b>Physical positions (bp)</b> | <b>SNPs</b> |
|-------------|----------------|------------------|------------------------------|--------------------------------|-------------|
| 23370       | CakSNP23370    | <i>Kabuli</i>    | Ca_Kabuli_denovo             | 20629298                       | (G/A)       |
| 23371       | CakSNP23371    | <i>Kabuli</i>    | Ca_Kabuli_denovo             | 20629762                       | (T/C)       |
| 23372       | CakSNP23372    | <i>Kabuli</i>    | Ca_Kabuli_denovo             | 20629816                       | (C/T)       |
| 23373       | CakSNP23373    | <i>Kabuli</i>    | Ca_Kabuli_denovo             | 20629867                       | (T/C)       |
| 23374       | CakSNP23374    | <i>Kabuli</i>    | Ca_Kabuli_denovo             | 20631581                       | (A/C)       |
| 23375       | CakSNP23375    | <i>Kabuli</i>    | Ca_Kabuli_denovo             | 20632830                       | (A/T)       |
| 23376       | CakSNP23376    | <i>Kabuli</i>    | Ca_Kabuli_denovo             | 20632874                       | (G/A)       |
| 23377       | CakSNP23377    | <i>Kabuli</i>    | Ca_Kabuli_denovo             | 20644947                       | (G/A)       |
| 23378       | CakSNP23378    | <i>Kabuli</i>    | Ca_Kabuli_denovo             | 20647462                       | (G/A)       |
| 23379       | CakSNP23379    | <i>Kabuli</i>    | Ca_Kabuli_denovo             | 20647463                       | (T/A)       |
| 23380       | CakSNP23380    | <i>Kabuli</i>    | Ca_Kabuli_denovo             | 20649939                       | (C/T)       |
| 23381       | CakSNP23381    | <i>Kabuli</i>    | Ca_Kabuli_denovo             | 20649985                       | (G/A)       |
| 23382       | CakSNP23382    | <i>Kabuli</i>    | Ca_Kabuli_denovo             | 20651807                       | (T/C)       |
| 23383       | CakSNP23383    | <i>Kabuli</i>    | Ca_Kabuli_denovo             | 20652253                       | (G/A)       |
| 23384       | CakSNP23384    | <i>Kabuli</i>    | Ca_Kabuli_denovo             | 20652319                       | (C/G)       |
| 23385       | CakSNP23385    | <i>Kabuli</i>    | Ca_Kabuli_denovo             | 20655181                       | (A/G)       |
| 23386       | CakSNP23386    | <i>Kabuli</i>    | Ca_Kabuli_denovo             | 20655205                       | (C/T)       |
| 23387       | CakSNP23387    | <i>Kabuli</i>    | Ca_Kabuli_denovo             | 20658706                       | (G/C)       |
| 23388       | CakSNP23388    | <i>Kabuli</i>    | Ca_Kabuli_denovo             | 20659695                       | (A/G)       |
| 23389       | CakSNP23389    | <i>Kabuli</i>    | Ca_Kabuli_denovo             | 20660543                       | (A/G)       |
| 23390       | CakSNP23390    | <i>Kabuli</i>    | Ca_Kabuli_denovo             | 20661734                       | (G/A)       |
| 23391       | CakSNP23391    | <i>Kabuli</i>    | Ca_Kabuli_denovo             | 20663129                       | (C/T)       |
| 23392       | CakSNP23392    | <i>Kabuli</i>    | Ca_Kabuli_denovo             | 20663431                       | (A/G)       |
| 23393       | CakSNP23393    | <i>Kabuli</i>    | Ca_Kabuli_denovo             | 20663481                       | (G/C)       |
| 23394       | CakSNP23394    | <i>Kabuli</i>    | Ca_Kabuli_denovo             | 20664732                       | (A/G)       |
| 23395       | CakSNP23395    | <i>Kabuli</i>    | Ca_Kabuli_denovo             | 20666474                       | (G/A)       |
| 23396       | CakSNP23396    | <i>Kabuli</i>    | Ca_Kabuli_denovo             | 20666533                       | (T/C)       |
| 23397       | CakSNP23397    | <i>Kabuli</i>    | Ca_Kabuli_denovo             | 20671435                       | (G/T)       |
| 23398       | CakSNP23398    | <i>Kabuli</i>    | Ca_Kabuli_denovo             | 20671438                       | (T/C)       |
| 23399       | CakSNP23399    | <i>Kabuli</i>    | Ca_Kabuli_denovo             | 20671699                       | (G/A)       |
| 23400       | CakSNP23400    | <i>Kabuli</i>    | Ca_Kabuli_denovo             | 20674290                       | (T/C)       |
| 23401       | CakSNP23401    | <i>Kabuli</i>    | Ca_Kabuli_denovo             | 20674470                       | (G/T)       |
| 23402       | CakSNP23402    | <i>Kabuli</i>    | Ca_Kabuli_denovo             | 20674471                       | (G/T)       |
| 23403       | CakSNP23403    | <i>Kabuli</i>    | Ca_Kabuli_denovo             | 20674987                       | (G/T)       |
| 23404       | CakSNP23404    | <i>Kabuli</i>    | Ca_Kabuli_denovo             | 20675794                       | (T/G)       |
| 23405       | CakSNP23405    | <i>Kabuli</i>    | Ca_Kabuli_denovo             | 20675819                       | (T/G)       |
| 23406       | CakSNP23406    | <i>Kabuli</i>    | Ca_Kabuli_denovo             | 20676549                       | (T/C)       |
| 23407       | CakSNP23407    | <i>Kabuli</i>    | Ca_Kabuli_denovo             | 20679128                       | (T/G)       |

| <b>S.N.</b> | <b>SNP IDs</b> | <b>Cultivars</b> | <b>Chromosomes/scaffolds</b> | <b>Physical positions (bp)</b> | <b>SNPs</b> |
|-------------|----------------|------------------|------------------------------|--------------------------------|-------------|
| 23408       | CakSNP23408    | <i>Kabuli</i>    | Ca_Kabuli_denovo             | 20681826                       | (C/T)       |
| 23409       | CakSNP23409    | <i>Kabuli</i>    | Ca_Kabuli_denovo             | 20681874                       | (G/C)       |
| 23410       | CakSNP23410    | <i>Kabuli</i>    | Ca_Kabuli_denovo             | 20682581                       | (T/C)       |
| 23411       | CakSNP23411    | <i>Kabuli</i>    | Ca_Kabuli_denovo             | 20682638                       | (C/T)       |
| 23412       | CakSNP23412    | <i>Kabuli</i>    | Ca_Kabuli_denovo             | 20692335                       | (G/C)       |
| 23413       | CakSNP23413    | <i>Kabuli</i>    | Ca_Kabuli_denovo             | 20692407                       | (A/C)       |
| 23414       | CakSNP23414    | <i>Kabuli</i>    | Ca_Kabuli_denovo             | 20693892                       | (G/T)       |
| 23415       | CakSNP23415    | <i>Kabuli</i>    | Ca_Kabuli_denovo             | 20697315                       | (A/G)       |
| 23416       | CakSNP23416    | <i>Kabuli</i>    | Ca_Kabuli_denovo             | 20698586                       | (G/T)       |
| 23417       | CakSNP23417    | <i>Kabuli</i>    | Ca_Kabuli_denovo             | 20702486                       | (G/C)       |
| 23418       | CakSNP23418    | <i>Kabuli</i>    | Ca_Kabuli_denovo             | 20702493                       | (C/G)       |
| 23419       | CakSNP23419    | <i>Kabuli</i>    | Ca_Kabuli_denovo             | 20706779                       | (G/T)       |
| 23420       | CakSNP23420    | <i>Kabuli</i>    | Ca_Kabuli_denovo             | 20706816                       | (A/T)       |
| 23421       | CakSNP23421    | <i>Kabuli</i>    | Ca_Kabuli_denovo             | 20710940                       | (G/A)       |
| 23422       | CakSNP23422    | <i>Kabuli</i>    | Ca_Kabuli_denovo             | 20712713                       | (G/C)       |
| 23423       | CakSNP23423    | <i>Kabuli</i>    | Ca_Kabuli_denovo             | 20712728                       | (C/T)       |
| 23424       | CakSNP23424    | <i>Kabuli</i>    | Ca_Kabuli_denovo             | 20713275                       | (G/A)       |
| 23425       | CakSNP23425    | <i>Kabuli</i>    | Ca_Kabuli_denovo             | 20715271                       | (G/A)       |
| 23426       | CakSNP23426    | <i>Kabuli</i>    | Ca_Kabuli_denovo             | 20720557                       | (A/G)       |
| 23427       | CakSNP23427    | <i>Kabuli</i>    | Ca_Kabuli_denovo             | 20723873                       | (C/G)       |
| 23428       | CakSNP23428    | <i>Kabuli</i>    | Ca_Kabuli_denovo             | 20723876                       | (A/G)       |
| 23429       | CakSNP23429    | <i>Kabuli</i>    | Ca_Kabuli_denovo             | 20725341                       | (A/G)       |
| 23430       | CakSNP23430    | <i>Kabuli</i>    | Ca_Kabuli_denovo             | 20725359                       | (C/G)       |
| 23431       | CakSNP23431    | <i>Kabuli</i>    | Ca_Kabuli_denovo             | 20727759                       | (C/G)       |
| 23432       | CakSNP23432    | <i>Kabuli</i>    | Ca_Kabuli_denovo             | 20727764                       | (G/C)       |
| 23433       | CakSNP23433    | <i>Kabuli</i>    | Ca_Kabuli_denovo             | 20740597                       | (A/G)       |
| 23434       | CakSNP23434    | <i>Kabuli</i>    | Ca_Kabuli_denovo             | 20740642                       | (C/G)       |
| 23435       | CakSNP23435    | <i>Kabuli</i>    | Ca_Kabuli_denovo             | 20743843                       | (A/G)       |
| 23436       | CakSNP23436    | <i>Kabuli</i>    | Ca_Kabuli_denovo             | 20760598                       | (T/G)       |
| 23437       | CakSNP23437    | <i>Kabuli</i>    | Ca_Kabuli_denovo             | 20765039                       | (A/C)       |
| 23438       | CakSNP23438    | <i>Kabuli</i>    | Ca_Kabuli_denovo             | 20765041                       | (A/G)       |
| 23439       | CakSNP23439    | <i>Kabuli</i>    | Ca_Kabuli_denovo             | 20773882                       | (C/A)       |
| 23440       | CakSNP23440    | <i>Kabuli</i>    | Ca_Kabuli_denovo             | 20777272                       | (G/T)       |
| 23441       | CakSNP23441    | <i>Kabuli</i>    | Ca_Kabuli_denovo             | 20777274                       | (T/C)       |
| 23442       | CakSNP23442    | <i>Kabuli</i>    | Ca_Kabuli_denovo             | 20782360                       | (T/C)       |
| 23443       | CakSNP23443    | <i>Kabuli</i>    | Ca_Kabuli_denovo             | 20789033                       | (T/C)       |
| 23444       | CakSNP23444    | <i>Kabuli</i>    | Ca_Kabuli_denovo             | 20790116                       | (A/C)       |
| 23445       | CakSNP23445    | <i>Kabuli</i>    | Ca_Kabuli_denovo             | 20790127                       | (C/T)       |

| <b>S.N.</b> | <b>SNP IDs</b> | <b>Cultivars</b> | <b>Chromosomes/scaffolds</b> | <b>Physical positions (bp)</b> | <b>SNPs</b> |
|-------------|----------------|------------------|------------------------------|--------------------------------|-------------|
| 23446       | CakSNP23446    | <i>Kabuli</i>    | Ca_Kabuli_denovo             | 20800334                       | (G/C)       |
| 23447       | CakSNP23447    | <i>Kabuli</i>    | Ca_Kabuli_denovo             | 20801433                       | (G/A)       |
| 23448       | CakSNP23448    | <i>Kabuli</i>    | Ca_Kabuli_denovo             | 20801457                       | (A/C)       |
| 23449       | CakSNP23449    | <i>Kabuli</i>    | Ca_Kabuli_denovo             | 20806916                       | (G/A)       |
| 23450       | CakSNP23450    | <i>Kabuli</i>    | Ca_Kabuli_denovo             | 20820671                       | (G/A)       |
| 23451       | CakSNP23451    | <i>Kabuli</i>    | Ca_Kabuli_denovo             | 20820733                       | (T/C)       |
| 23452       | CakSNP23452    | <i>Kabuli</i>    | Ca_Kabuli_denovo             | 20822191                       | (C/G)       |
| 23453       | CakSNP23453    | <i>Kabuli</i>    | Ca_Kabuli_denovo             | 20827366                       | (C/G)       |
| 23454       | CakSNP23454    | <i>Kabuli</i>    | Ca_Kabuli_denovo             | 20827408                       | (C/G)       |
| 23455       | CakSNP23455    | <i>Kabuli</i>    | Ca_Kabuli_denovo             | 20828077                       | (G/T)       |
| 23456       | CakSNP23456    | <i>Kabuli</i>    | Ca_Kabuli_denovo             | 20840036                       | (A/T)       |
| 23457       | CakSNP23457    | <i>Kabuli</i>    | Ca_Kabuli_denovo             | 20848569                       | (C/T)       |
| 23458       | CakSNP23458    | <i>Kabuli</i>    | Ca_Kabuli_denovo             | 20850730                       | (C/G)       |
| 23459       | CakSNP23459    | <i>Kabuli</i>    | Ca_Kabuli_denovo             | 20858746                       | (C/T)       |
| 23460       | CakSNP23460    | <i>Kabuli</i>    | Ca_Kabuli_denovo             | 20858776                       | (G/T)       |
| 23461       | CakSNP23461    | <i>Kabuli</i>    | Ca_Kabuli_denovo             | 20859779                       | (C/G)       |
| 23462       | CakSNP23462    | <i>Kabuli</i>    | Ca_Kabuli_denovo             | 20859806                       | (A/C)       |
| 23463       | CakSNP23463    | <i>Kabuli</i>    | Ca_Kabuli_denovo             | 20865497                       | (C/T)       |
| 23464       | CakSNP23464    | <i>Kabuli</i>    | Ca_Kabuli_denovo             | 20869412                       | (A/G)       |
| 23465       | CakSNP23465    | <i>Kabuli</i>    | Ca_Kabuli_denovo             | 20870518                       | (G/T)       |
| 23466       | CakSNP23466    | <i>Kabuli</i>    | Ca_Kabuli_denovo             | 20870556                       | (T/C)       |
| 23467       | CakSNP23467    | <i>Kabuli</i>    | Ca_Kabuli_denovo             | 20877900                       | (G/C)       |
| 23468       | CakSNP23468    | <i>Kabuli</i>    | Ca_Kabuli_denovo             | 20881291                       | (A/C)       |
| 23469       | CakSNP23469    | <i>Kabuli</i>    | Ca_Kabuli_denovo             | 20889434                       | (C/T)       |
| 23470       | CakSNP23470    | <i>Kabuli</i>    | Ca_Kabuli_denovo             | 20889463                       | (A/G)       |
| 23471       | CakSNP23471    | <i>Kabuli</i>    | Ca_Kabuli_denovo             | 20890276                       | (G/A)       |
| 23472       | CakSNP23472    | <i>Kabuli</i>    | Ca_Kabuli_denovo             | 20890735                       | (C/G)       |
| 23473       | CakSNP23473    | <i>Kabuli</i>    | Ca_Kabuli_denovo             | 20891812                       | (G/T)       |
| 23474       | CakSNP23474    | <i>Kabuli</i>    | Ca_Kabuli_denovo             | 20896658                       | (T/C)       |
| 23475       | CakSNP23475    | <i>Kabuli</i>    | Ca_Kabuli_denovo             | 20899817                       | (G/A)       |
| 23476       | CakSNP23476    | <i>Kabuli</i>    | Ca_Kabuli_denovo             | 20899873                       | (C/T)       |
| 23477       | CakSNP23477    | <i>Kabuli</i>    | Ca_Kabuli_denovo             | 20901410                       | (G/A)       |
| 23478       | CakSNP23478    | <i>Kabuli</i>    | Ca_Kabuli_denovo             | 20902136                       | (G/T)       |
| 23479       | CakSNP23479    | <i>Kabuli</i>    | Ca_Kabuli_denovo             | 20902138                       | (C/G)       |
| 23480       | CakSNP23480    | <i>Kabuli</i>    | Ca_Kabuli_denovo             | 20905216                       | (C/G)       |
| 23481       | CakSNP23481    | <i>Kabuli</i>    | Ca_Kabuli_denovo             | 20909680                       | (A/G)       |
| 23482       | CakSNP23482    | <i>Kabuli</i>    | Ca_Kabuli_denovo             | 20918685                       | (A/G)       |
| 23483       | CakSNP23483    | <i>Kabuli</i>    | Ca_Kabuli_denovo             | 20920301                       | (T/C)       |

| <b>S.N.</b> | <b>SNP IDs</b> | <b>Cultivars</b> | <b>Chromosomes/scaffolds</b> | <b>Physical positions (bp)</b> | <b>SNPs</b> |
|-------------|----------------|------------------|------------------------------|--------------------------------|-------------|
| 23484       | CakSNP23484    | <i>Kabuli</i>    | Ca_Kabuli_denovo             | 20927066                       | (C/T)       |
| 23485       | CakSNP23485    | <i>Kabuli</i>    | Ca_Kabuli_denovo             | 20927075                       | (C/G)       |
| 23486       | CakSNP23486    | <i>Kabuli</i>    | Ca_Kabuli_denovo             | 20930235                       | (A/G)       |
| 23487       | CakSNP23487    | <i>Kabuli</i>    | Ca_Kabuli_denovo             | 20931160                       | (C/G)       |
| 23488       | CakSNP23488    | <i>Kabuli</i>    | Ca_Kabuli_denovo             | 20932009                       | (C/G)       |
| 23489       | CakSNP23489    | <i>Kabuli</i>    | Ca_Kabuli_denovo             | 20932069                       | (A/G)       |
| 23490       | CakSNP23490    | <i>Kabuli</i>    | Ca_Kabuli_denovo             | 20935272                       | (C/T)       |
| 23491       | CakSNP23491    | <i>Kabuli</i>    | Ca_Kabuli_denovo             | 20939058                       | (G/A)       |
| 23492       | CakSNP23492    | <i>Kabuli</i>    | Ca_Kabuli_denovo             | 20942369                       | (T/G)       |
| 23493       | CakSNP23493    | <i>Kabuli</i>    | Ca_Kabuli_denovo             | 20943817                       | (C/G)       |
| 23494       | CakSNP23494    | <i>Kabuli</i>    | Ca_Kabuli_denovo             | 20943829                       | (C/T)       |
| 23495       | CakSNP23495    | <i>Kabuli</i>    | Ca_Kabuli_denovo             | 20947352                       | (G/A)       |
| 23496       | CakSNP23496    | <i>Kabuli</i>    | Ca_Kabuli_denovo             | 20952554                       | (G/C)       |
| 23497       | CakSNP23497    | <i>Kabuli</i>    | Ca_Kabuli_denovo             | 20954312                       | (C/T)       |
| 23498       | CakSNP23498    | <i>Kabuli</i>    | Ca_Kabuli_denovo             | 20954315                       | (T/C)       |
| 23499       | CakSNP23499    | <i>Kabuli</i>    | Ca_Kabuli_denovo             | 20956282                       | (G/C)       |
| 23500       | CakSNP23500    | <i>Kabuli</i>    | Ca_Kabuli_denovo             | 20956459                       | (C/T)       |
| 23501       | CakSNP23501    | <i>Kabuli</i>    | Ca_Kabuli_denovo             | 20957959                       | (T/C)       |
| 23502       | CakSNP23502    | <i>Kabuli</i>    | Ca_Kabuli_denovo             | 20959789                       | (T/A)       |
| 23503       | CakSNP23503    | <i>Kabuli</i>    | Ca_Kabuli_denovo             | 20962222                       | (G/A)       |
| 23504       | CakSNP23504    | <i>Kabuli</i>    | Ca_Kabuli_denovo             | 20962285                       | (A/G)       |
| 23505       | CakSNP23505    | <i>Kabuli</i>    | Ca_Kabuli_denovo             | 20967037                       | (G/A)       |
| 23506       | CakSNP23506    | <i>Kabuli</i>    | Ca_Kabuli_denovo             | 20975342                       | (A/G)       |
| 23507       | CakSNP23507    | <i>Kabuli</i>    | Ca_Kabuli_denovo             | 20976175                       | (G/A)       |
| 23508       | CakSNP23508    | <i>Kabuli</i>    | Ca_Kabuli_denovo             | 20976187                       | (A/G)       |
| 23509       | CakSNP23509    | <i>Kabuli</i>    | Ca_Kabuli_denovo             | 20976285                       | (G/A)       |
| 23510       | CakSNP23510    | <i>Kabuli</i>    | Ca_Kabuli_denovo             | 20978728                       | (G/A)       |
| 23511       | CakSNP23511    | <i>Kabuli</i>    | Ca_Kabuli_denovo             | 20980830                       | (T/C)       |
| 23512       | CakSNP23512    | <i>Kabuli</i>    | Ca_Kabuli_denovo             | 20980872                       | (T/C)       |
| 23513       | CakSNP23513    | <i>Kabuli</i>    | Ca_Kabuli_denovo             | 20982688                       | (A/G)       |
| 23514       | CakSNP23514    | <i>Kabuli</i>    | Ca_Kabuli_denovo             | 20982709                       | (G/T)       |
| 23515       | CakSNP23515    | <i>Kabuli</i>    | Ca_Kabuli_denovo             | 20986531                       | (C/T)       |
| 23516       | CakSNP23516    | <i>Kabuli</i>    | Ca_Kabuli_denovo             | 20987836                       | (A/G)       |
| 23517       | CakSNP23517    | <i>Kabuli</i>    | Ca_Kabuli_denovo             | 20990243                       | (A/G)       |
| 23518       | CakSNP23518    | <i>Kabuli</i>    | Ca_Kabuli_denovo             | 20990278                       | (C/A)       |
| 23519       | CakSNP23519    | <i>Kabuli</i>    | Ca_Kabuli_denovo             | 20994487                       | (A/G)       |
| 23520       | CakSNP23520    | <i>Kabuli</i>    | Ca_Kabuli_denovo             | 20994648                       | (A/C)       |
| 23521       | CakSNP23521    | <i>Kabuli</i>    | Ca_Kabuli_denovo             | 20994656                       | (T/C)       |

| <b>S.N.</b> | <b>SNP IDs</b> | <b>Cultivars</b> | <b>Chromosomes/scaffolds</b> | <b>Physical positions (bp)</b> | <b>SNPs</b> |
|-------------|----------------|------------------|------------------------------|--------------------------------|-------------|
| 23522       | CakSNP23522    | <i>Kabuli</i>    | Ca_Kabuli_denovo             | 20996617                       | (A/G)       |
| 23523       | CakSNP23523    | <i>Kabuli</i>    | Ca_Kabuli_denovo             | 21002777                       | (T/C)       |
| 23524       | CakSNP23524    | <i>Kabuli</i>    | Ca_Kabuli_denovo             | 21005000                       | (G/A)       |
| 23525       | CakSNP23525    | <i>Kabuli</i>    | Ca_Kabuli_denovo             | 21005039                       | (G/A)       |
| 23526       | CakSNP23526    | <i>Kabuli</i>    | Ca_Kabuli_denovo             | 21005600                       | (G/C)       |
| 23527       | CakSNP23527    | <i>Kabuli</i>    | Ca_Kabuli_denovo             | 21005601                       | (C/T)       |
| 23528       | CakSNP23528    | <i>Kabuli</i>    | Ca_Kabuli_denovo             | 21008057                       | (T/G)       |
| 23529       | CakSNP23529    | <i>Kabuli</i>    | Ca_Kabuli_denovo             | 21008099                       | (G/C)       |
| 23530       | CakSNP23530    | <i>Kabuli</i>    | Ca_Kabuli_denovo             | 21008633                       | (A/C)       |
| 23531       | CakSNP23531    | <i>Kabuli</i>    | Ca_Kabuli_denovo             | 21008674                       | (C/G)       |
| 23532       | CakSNP23532    | <i>Kabuli</i>    | Ca_Kabuli_denovo             | 21012356                       | (C/T)       |
| 23533       | CakSNP23533    | <i>Kabuli</i>    | Ca_Kabuli_denovo             | 21012365                       | (C/T)       |
| 23534       | CakSNP23534    | <i>Kabuli</i>    | Ca_Kabuli_denovo             | 21017170                       | (C/G)       |
| 23535       | CakSNP23535    | <i>Kabuli</i>    | Ca_Kabuli_denovo             | 21017204                       | (G/A)       |
| 23536       | CakSNP23536    | <i>Kabuli</i>    | Ca_Kabuli_denovo             | 21017243                       | (A/G)       |
| 23537       | CakSNP23537    | <i>Kabuli</i>    | Ca_Kabuli_denovo             | 21020518                       | (G/A)       |
| 23538       | CakSNP23538    | <i>Kabuli</i>    | Ca_Kabuli_denovo             | 21020548                       | (A/T)       |
| 23539       | CakSNP23539    | <i>Kabuli</i>    | Ca_Kabuli_denovo             | 21024546                       | (T/C)       |
| 23540       | CakSNP23540    | <i>Kabuli</i>    | Ca_Kabuli_denovo             | 21030016                       | (C/T)       |
| 23541       | CakSNP23541    | <i>Kabuli</i>    | Ca_Kabuli_denovo             | 21044341                       | (C/T)       |
| 23542       | CakSNP23542    | <i>Kabuli</i>    | Ca_Kabuli_denovo             | 21047977                       | (T/C)       |
| 23543       | CakSNP23543    | <i>Kabuli</i>    | Ca_Kabuli_denovo             | 21061094                       | (T/A)       |
| 23544       | CakSNP23544    | <i>Kabuli</i>    | Ca_Kabuli_denovo             | 21068365                       | (G/C)       |
| 23545       | CakSNP23545    | <i>Kabuli</i>    | Ca_Kabuli_denovo             | 21068404                       | (G/T)       |
| 23546       | CakSNP23546    | <i>Kabuli</i>    | Ca_Kabuli_denovo             | 21071286                       | (C/T)       |
| 23547       | CakSNP23547    | <i>Kabuli</i>    | Ca_Kabuli_denovo             | 21077257                       | (A/G)       |
| 23548       | CakSNP23548    | <i>Kabuli</i>    | Ca_Kabuli_denovo             | 21077281                       | (T/C)       |
| 23549       | CakSNP23549    | <i>Kabuli</i>    | Ca_Kabuli_denovo             | 21082230                       | (G/T)       |
| 23550       | CakSNP23550    | <i>Kabuli</i>    | Ca_Kabuli_denovo             | 21082236                       | (G/T)       |
| 23551       | CakSNP23551    | <i>Kabuli</i>    | Ca_Kabuli_denovo             | 21082241                       | (T/G)       |
| 23552       | CakSNP23552    | <i>Kabuli</i>    | Ca_Kabuli_denovo             | 21082258                       | (T/G)       |
| 23553       | CakSNP23553    | <i>Kabuli</i>    | Ca_Kabuli_denovo             | 21084346                       | (T/G)       |
| 23554       | CakSNP23554    | <i>Kabuli</i>    | Ca_Kabuli_denovo             | 21084718                       | (T/G)       |
| 23555       | CakSNP23555    | <i>Kabuli</i>    | Ca_Kabuli_denovo             | 21084761                       | (A/G)       |
| 23556       | CakSNP23556    | <i>Kabuli</i>    | Ca_Kabuli_denovo             | 21090649                       | (T/C)       |
| 23557       | CakSNP23557    | <i>Kabuli</i>    | Ca_Kabuli_denovo             | 21090888                       | (C/G)       |
| 23558       | CakSNP23558    | <i>Kabuli</i>    | Ca_Kabuli_denovo             | 21090964                       | (T/G)       |
| 23559       | CakSNP23559    | <i>Kabuli</i>    | Ca_Kabuli_denovo             | 21090985                       | (G/A)       |

| <b>S.N.</b> | <b>SNP IDs</b> | <b>Cultivars</b> | <b>Chromosomes/scaffolds</b> | <b>Physical positions (bp)</b> | <b>SNPs</b> |
|-------------|----------------|------------------|------------------------------|--------------------------------|-------------|
| 23560       | CakSNP23560    | <i>Kabuli</i>    | Ca_Kabuli_denovo             | 21100610                       | (C/T)       |
| 23561       | CakSNP23561    | <i>Kabuli</i>    | Ca_Kabuli_denovo             | 21106642                       | (C/A)       |
| 23562       | CakSNP23562    | <i>Kabuli</i>    | Ca_Kabuli_denovo             | 21106699                       | (A/C)       |
| 23563       | CakSNP23563    | <i>Kabuli</i>    | Ca_Kabuli_denovo             | 21110848                       | (T/C)       |
| 23564       | CakSNP23564    | <i>Kabuli</i>    | Ca_Kabuli_denovo             | 21113900                       | (T/C)       |
| 23565       | CakSNP23565    | <i>Kabuli</i>    | Ca_Kabuli_denovo             | 21115327                       | (A/G)       |
| 23566       | CakSNP23566    | <i>Kabuli</i>    | Ca_Kabuli_denovo             | 21115333                       | (A/G)       |
| 23567       | CakSNP23567    | <i>Kabuli</i>    | Ca_Kabuli_denovo             | 21117191                       | (C/A)       |
| 23568       | CakSNP23568    | <i>Kabuli</i>    | Ca_Kabuli_denovo             | 21117193                       | (A/G)       |
| 23569       | CakSNP23569    | <i>Kabuli</i>    | Ca_Kabuli_denovo             | 21126652                       | (G/A)       |
| 23570       | CakSNP23570    | <i>Kabuli</i>    | Ca_Kabuli_denovo             | 21126679                       | (A/G)       |
| 23571       | CakSNP23571    | <i>Kabuli</i>    | Ca_Kabuli_denovo             | 21134870                       | (G/C)       |
| 23572       | CakSNP23572    | <i>Kabuli</i>    | Ca_Kabuli_denovo             | 21144962                       | (T/A)       |
| 23573       | CakSNP23573    | <i>Kabuli</i>    | Ca_Kabuli_denovo             | 21144985                       | (C/A)       |
| 23574       | CakSNP23574    | <i>Kabuli</i>    | Ca_Kabuli_denovo             | 21147449                       | (T/C)       |
| 23575       | CakSNP23575    | <i>Kabuli</i>    | Ca_Kabuli_denovo             | 21150332                       | (C/T)       |
| 23576       | CakSNP23576    | <i>Kabuli</i>    | Ca_Kabuli_denovo             | 21154187                       | (C/T)       |
| 23577       | CakSNP23577    | <i>Kabuli</i>    | Ca_Kabuli_denovo             | 21158231                       | (C/G)       |
| 23578       | CakSNP23578    | <i>Kabuli</i>    | Ca_Kabuli_denovo             | 21160880                       | (G/A)       |
| 23579       | CakSNP23579    | <i>Kabuli</i>    | Ca_Kabuli_denovo             | 21162260                       | (T/C)       |
| 23580       | CakSNP23580    | <i>Kabuli</i>    | Ca_Kabuli_denovo             | 21162266                       | (A/G)       |
| 23581       | CakSNP23581    | <i>Kabuli</i>    | Ca_Kabuli_denovo             | 21169177                       | (C/T)       |
| 23582       | CakSNP23582    | <i>Kabuli</i>    | Ca_Kabuli_denovo             | 21173866                       | (C/A)       |
| 23583       | CakSNP23583    | <i>Kabuli</i>    | Ca_Kabuli_denovo             | 21176854                       | (A/G)       |
| 23584       | CakSNP23584    | <i>Kabuli</i>    | Ca_Kabuli_denovo             | 21176884                       | (G/A)       |
| 23585       | CakSNP23585    | <i>Kabuli</i>    | Ca_Kabuli_denovo             | 21178432                       | (G/A)       |
| 23586       | CakSNP23586    | <i>Kabuli</i>    | Ca_Kabuli_denovo             | 21179437                       | (A/G)       |
| 23587       | CakSNP23587    | <i>Kabuli</i>    | Ca_Kabuli_denovo             | 21179446                       | (C/G)       |
| 23588       | CakSNP23588    | <i>Kabuli</i>    | Ca_Kabuli_denovo             | 21181786                       | (T/C)       |
| 23589       | CakSNP23589    | <i>Kabuli</i>    | Ca_Kabuli_denovo             | 21184619                       | (T/C)       |
| 23590       | CakSNP23590    | <i>Kabuli</i>    | Ca_Kabuli_denovo             | 21184628                       | (T/C)       |
| 23591       | CakSNP23591    | <i>Kabuli</i>    | Ca_Kabuli_denovo             | 21186065                       | (G/A)       |
| 23592       | CakSNP23592    | <i>Kabuli</i>    | Ca_Kabuli_denovo             | 21186539                       | (G/T)       |
| 23593       | CakSNP23593    | <i>Kabuli</i>    | Ca_Kabuli_denovo             | 21190874                       | (G/T)       |
| 23594       | CakSNP23594    | <i>Kabuli</i>    | Ca_Kabuli_denovo             | 21194997                       | (C/T)       |
| 23595       | CakSNP23595    | <i>Kabuli</i>    | Ca_Kabuli_denovo             | 21199835                       | (G/C)       |
| 23596       | CakSNP23596    | <i>Kabuli</i>    | Ca_Kabuli_denovo             | 21200833                       | (T/G)       |
| 23597       | CakSNP23597    | <i>Kabuli</i>    | Ca_Kabuli_denovo             | 21204235                       | (G/C)       |

| <b>S.N.</b> | <b>SNP IDs</b> | <b>Cultivars</b> | <b>Chromosomes/scaffolds</b> | <b>Physical positions (bp)</b> | <b>SNPs</b> |
|-------------|----------------|------------------|------------------------------|--------------------------------|-------------|
| 23598       | CakSNP23598    | <i>Kabuli</i>    | Ca_Kabuli_denovo             | 21208112                       | (C/A)       |
| 23599       | CakSNP23599    | <i>Kabuli</i>    | Ca_Kabuli_denovo             | 21208135                       | (A/G)       |
| 23600       | CakSNP23600    | <i>Kabuli</i>    | Ca_Kabuli_denovo             | 21213971                       | (C/T)       |
| 23601       | CakSNP23601    | <i>Kabuli</i>    | Ca_Kabuli_denovo             | 21221451                       | (T/G)       |
| 23602       | CakSNP23602    | <i>Kabuli</i>    | Ca_Kabuli_denovo             | 21225048                       | (C/G)       |
| 23603       | CakSNP23603    | <i>Kabuli</i>    | Ca_Kabuli_denovo             | 21225421                       | (G/C)       |
| 23604       | CakSNP23604    | <i>Kabuli</i>    | Ca_Kabuli_denovo             | 21231167                       | (T/G)       |
| 23605       | CakSNP23605    | <i>Kabuli</i>    | Ca_Kabuli_denovo             | 21232376                       | (C/T)       |
| 23606       | CakSNP23606    | <i>Kabuli</i>    | Ca_Kabuli_denovo             | 21232394                       | (C/T)       |
| 23607       | CakSNP23607    | <i>Kabuli</i>    | Ca_Kabuli_denovo             | 21244441                       | (C/T)       |
| 23608       | CakSNP23608    | <i>Kabuli</i>    | Ca_Kabuli_denovo             | 21250052                       | (G/A)       |
| 23609       | CakSNP23609    | <i>Kabuli</i>    | Ca_Kabuli_denovo             | 21250842                       | (G/A)       |
| 23610       | CakSNP23610    | <i>Kabuli</i>    | Ca_Kabuli_denovo             | 21251182                       | (T/G)       |
| 23611       | CakSNP23611    | <i>Kabuli</i>    | Ca_Kabuli_denovo             | 21254233                       | (T/C)       |
| 23612       | CakSNP23612    | <i>Kabuli</i>    | Ca_Kabuli_denovo             | 21255077                       | (G/A)       |
| 23613       | CakSNP23613    | <i>Kabuli</i>    | Ca_Kabuli_denovo             | 21255104                       | (G/C)       |
| 23614       | CakSNP23614    | <i>Kabuli</i>    | Ca_Kabuli_denovo             | 21256294                       | (T/C)       |
| 23615       | CakSNP23615    | <i>Kabuli</i>    | Ca_Kabuli_denovo             | 21262614                       | (C/G)       |
| 23616       | CakSNP23616    | <i>Kabuli</i>    | Ca_Kabuli_denovo             | 21262652                       | (T/C)       |
| 23617       | CakSNP23617    | <i>Kabuli</i>    | Ca_Kabuli_denovo             | 21267786                       | (A/G)       |
| 23618       | CakSNP23618    | <i>Kabuli</i>    | Ca_Kabuli_denovo             | 21270928                       | (G/A)       |
| 23619       | CakSNP23619    | <i>Kabuli</i>    | Ca_Kabuli_denovo             | 21271173                       | (G/A)       |
| 23620       | CakSNP23620    | <i>Kabuli</i>    | Ca_Kabuli_denovo             | 21271385                       | (C/A)       |
| 23621       | CakSNP23621    | <i>Kabuli</i>    | Ca_Kabuli_denovo             | 21272775                       | (A/G)       |
| 23622       | CakSNP23622    | <i>Kabuli</i>    | Ca_Kabuli_denovo             | 21277217                       | (C/T)       |
| 23623       | CakSNP23623    | <i>Kabuli</i>    | Ca_Kabuli_denovo             | 21277218                       | (C/T)       |
| 23624       | CakSNP23624    | <i>Kabuli</i>    | Ca_Kabuli_denovo             | 21279072                       | (C/T)       |
| 23625       | CakSNP23625    | <i>Kabuli</i>    | Ca_Kabuli_denovo             | 21279083                       | (A/G)       |
| 23626       | CakSNP23626    | <i>Kabuli</i>    | Ca_Kabuli_denovo             | 21282944                       | (G/A)       |
| 23627       | CakSNP23627    | <i>Kabuli</i>    | Ca_Kabuli_denovo             | 21283436                       | (C/T)       |
| 23628       | CakSNP23628    | <i>Kabuli</i>    | Ca_Kabuli_denovo             | 21284173                       | (C/G)       |
| 23629       | CakSNP23629    | <i>Kabuli</i>    | Ca_Kabuli_denovo             | 21295065                       | (G/C)       |
| 23630       | CakSNP23630    | <i>Kabuli</i>    | Ca_Kabuli_denovo             | 21295070                       | (T/C)       |
| 23631       | CakSNP23631    | <i>Kabuli</i>    | Ca_Kabuli_denovo             | 21296946                       | (T/A)       |
| 23632       | CakSNP23632    | <i>Kabuli</i>    | Ca_Kabuli_denovo             | 21296983                       | (G/A)       |
| 23633       | CakSNP23633    | <i>Kabuli</i>    | Ca_Kabuli_denovo             | 21298616                       | (T/C)       |
| 23634       | CakSNP23634    | <i>Kabuli</i>    | Ca_Kabuli_denovo             | 21307635                       | (G/A)       |
| 23635       | CakSNP23635    | <i>Kabuli</i>    | Ca_Kabuli_denovo             | 21308677                       | (T/G)       |



| <b>S.N.</b> | <b>SNP IDs</b> | <b>Cultivars</b> | <b>Chromosomes/scaffolds</b> | <b>Physical positions (bp)</b> | <b>SNPs</b> |
|-------------|----------------|------------------|------------------------------|--------------------------------|-------------|
| 23636       | CakSNP23636    | <i>Kabuli</i>    | Ca_Kabuli_denovo             | 21318213                       | (A/C)       |
| 23637       | CakSNP23637    | <i>Kabuli</i>    | Ca_Kabuli_denovo             | 21329472                       | (A/G)       |
| 23638       | CakSNP23638    | <i>Kabuli</i>    | Ca_Kabuli_denovo             | 21331823                       | (C/A)       |
| 23639       | CakSNP23639    | <i>Kabuli</i>    | Ca_Kabuli_denovo             | 21331826                       | (C/G)       |
| 23640       | CakSNP23640    | <i>Kabuli</i>    | Ca_Kabuli_denovo             | 21332074                       | (C/T)       |
| 23641       | CakSNP23641    | <i>Kabuli</i>    | Ca_Kabuli_denovo             | 21332076                       | (A/G)       |
| 23642       | CakSNP23642    | <i>Kabuli</i>    | Ca_Kabuli_denovo             | 21341423                       | (C/T)       |
| 23643       | CakSNP23643    | <i>Kabuli</i>    | Ca_Kabuli_denovo             | 21341964                       | (T/C)       |
| 23644       | CakSNP23644    | <i>Kabuli</i>    | Ca_Kabuli_denovo             | 21343141                       | (C/T)       |
| 23645       | CakSNP23645    | <i>Kabuli</i>    | Ca_Kabuli_denovo             | 21344835                       | (G/C)       |
| 23646       | CakSNP23646    | <i>Kabuli</i>    | Ca_Kabuli_denovo             | 21348438                       | (G/A)       |
| 23647       | CakSNP23647    | <i>Kabuli</i>    | Ca_Kabuli_denovo             | 21348450                       | (T/C)       |
| 23648       | CakSNP23648    | <i>Kabuli</i>    | Ca_Kabuli_denovo             | 21349005                       | (C/A)       |
| 23649       | CakSNP23649    | <i>Kabuli</i>    | Ca_Kabuli_denovo             | 21351422                       | (A/T)       |
| 23650       | CakSNP23650    | <i>Kabuli</i>    | Ca_Kabuli_denovo             | 21356826                       | (T/C)       |
| 23651       | CakSNP23651    | <i>Kabuli</i>    | Ca_Kabuli_denovo             | 21356851                       | (C/G)       |
| 23652       | CakSNP23652    | <i>Kabuli</i>    | Ca_Kabuli_denovo             | 21358482                       | (G/A)       |
| 23653       | CakSNP23653    | <i>Kabuli</i>    | Ca_Kabuli_denovo             | 21358524                       | (C/T)       |
| 23654       | CakSNP23654    | <i>Kabuli</i>    | Ca_Kabuli_denovo             | 21361581                       | (C/T)       |
| 23655       | CakSNP23655    | <i>Kabuli</i>    | Ca_Kabuli_denovo             | 21366756                       | (G/T)       |
| 23656       | CakSNP23656    | <i>Kabuli</i>    | Ca_Kabuli_denovo             | 21367515                       | (G/C)       |
| 23657       | CakSNP23657    | <i>Kabuli</i>    | Ca_Kabuli_denovo             | 21367533                       | (T/C)       |
| 23658       | CakSNP23658    | <i>Kabuli</i>    | Ca_Kabuli_denovo             | 21367537                       | (C/A)       |
| 23659       | CakSNP23659    | <i>Kabuli</i>    | Ca_Kabuli_denovo             | 21372130                       | (G/A)       |
| 23660       | CakSNP23660    | <i>Kabuli</i>    | Ca_Kabuli_denovo             | 21377916                       | (G/A)       |
| 23661       | CakSNP23661    | <i>Kabuli</i>    | Ca_Kabuli_denovo             | 21377970                       | (T/C)       |
| 23662       | CakSNP23662    | <i>Kabuli</i>    | Ca_Kabuli_denovo             | 21380467                       | (C/T)       |
| 23663       | CakSNP23663    | <i>Kabuli</i>    | Ca_Kabuli_denovo             | 21381098                       | (G/A)       |
| 23664       | CakSNP23664    | <i>Kabuli</i>    | Ca_Kabuli_denovo             | 21381144                       | (C/A)       |
| 23665       | CakSNP23665    | <i>Kabuli</i>    | Ca_Kabuli_denovo             | 21384365                       | (C/T)       |
| 23666       | CakSNP23666    | <i>Kabuli</i>    | Ca_Kabuli_denovo             | 21384367                       | (G/A)       |
| 23667       | CakSNP23667    | <i>Kabuli</i>    | Ca_Kabuli_denovo             | 21385344                       | (T/G)       |
| 23668       | CakSNP23668    | <i>Kabuli</i>    | Ca_Kabuli_denovo             | 21393480                       | (A/G)       |
| 23669       | CakSNP23669    | <i>Kabuli</i>    | Ca_Kabuli_denovo             | 21393528                       | (G/A)       |
| 23670       | CakSNP23670    | <i>Kabuli</i>    | Ca_Kabuli_denovo             | 21399407                       | (A/T)       |
| 23671       | CakSNP23671    | <i>Kabuli</i>    | Ca_Kabuli_denovo             | 21399412                       | (G/A)       |
| 23672       | CakSNP23672    | <i>Kabuli</i>    | Ca_Kabuli_denovo             | 21400517                       | (C/T)       |
| 23673       | CakSNP23673    | <i>Kabuli</i>    | Ca_Kabuli_denovo             | 21400573                       | (C/T)       |

| <b>S.N.</b> | <b>SNP IDs</b> | <b>Cultivars</b> | <b>Chromosomes/scaffolds</b> | <b>Physical positions (bp)</b> | <b>SNPs</b> |
|-------------|----------------|------------------|------------------------------|--------------------------------|-------------|
| 23674       | CakSNP23674    | <i>Kabuli</i>    | Ca_Kabuli_denovo             | 21407519                       | (A/G)       |
| 23675       | CakSNP23675    | <i>Kabuli</i>    | Ca_Kabuli_denovo             | 21421791                       | (A/G)       |
| 23676       | CakSNP23676    | <i>Kabuli</i>    | Ca_Kabuli_denovo             | 21424958                       | (T/G)       |
| 23677       | CakSNP23677    | <i>Kabuli</i>    | Ca_Kabuli_denovo             | 21440438                       | (T/G)       |
| 23678       | CakSNP23678    | <i>Kabuli</i>    | Ca_Kabuli_denovo             | 21445256                       | (G/A)       |
| 23679       | CakSNP23679    | <i>Kabuli</i>    | Ca_Kabuli_denovo             | 21445286                       | (A/G)       |
| 23680       | CakSNP23680    | <i>Kabuli</i>    | Ca_Kabuli_denovo             | 21451496                       | (T/C)       |
| 23681       | CakSNP23681    | <i>Kabuli</i>    | Ca_Kabuli_denovo             | 21452183                       | (A/G)       |
| 23682       | CakSNP23682    | <i>Kabuli</i>    | Ca_Kabuli_denovo             | 21455208                       | (T/C)       |
| 23683       | CakSNP23683    | <i>Kabuli</i>    | Ca_Kabuli_denovo             | 21455244                       | (C/A)       |
| 23684       | CakSNP23684    | <i>Kabuli</i>    | Ca_Kabuli_denovo             | 21459122                       | (C/A)       |
| 23685       | CakSNP23685    | <i>Kabuli</i>    | Ca_Kabuli_denovo             | 21459187                       | (G/A)       |
| 23686       | CakSNP23686    | <i>Kabuli</i>    | Ca_Kabuli_denovo             | 21467527                       | (T/G)       |
| 23687       | CakSNP23687    | <i>Kabuli</i>    | Ca_Kabuli_denovo             | 21467545                       | (C/T)       |
| 23688       | CakSNP23688    | <i>Kabuli</i>    | Ca_Kabuli_denovo             | 21475924                       | (A/G)       |
| 23689       | CakSNP23689    | <i>Kabuli</i>    | Ca_Kabuli_denovo             | 21478754                       | (G/A)       |
| 23690       | CakSNP23690    | <i>Kabuli</i>    | Ca_Kabuli_denovo             | 21482973                       | (G/C)       |
| 23691       | CakSNP23691    | <i>Kabuli</i>    | Ca_Kabuli_denovo             | 21484952                       | (C/T)       |
| 23692       | CakSNP23692    | <i>Kabuli</i>    | Ca_Kabuli_denovo             | 21490667                       | (C/T)       |
| 23693       | CakSNP23693    | <i>Kabuli</i>    | Ca_Kabuli_denovo             | 21491669                       | (C/G)       |
| 23694       | CakSNP23694    | <i>Kabuli</i>    | Ca_Kabuli_denovo             | 21493435                       | (C/A)       |
| 23695       | CakSNP23695    | <i>Kabuli</i>    | Ca_Kabuli_denovo             | 21501063                       | (A/G)       |
| 23696       | CakSNP23696    | <i>Kabuli</i>    | Ca_Kabuli_denovo             | 21503867                       | (A/G)       |
| 23697       | CakSNP23697    | <i>Kabuli</i>    | Ca_Kabuli_denovo             | 21505441                       | (A/T)       |
| 23698       | CakSNP23698    | <i>Kabuli</i>    | Ca_Kabuli_denovo             | 21506174                       | (G/A)       |
| 23699       | CakSNP23699    | <i>Kabuli</i>    | Ca_Kabuli_denovo             | 21506198                       | (C/T)       |
| 23700       | CakSNP23700    | <i>Kabuli</i>    | Ca_Kabuli_denovo             | 21510879                       | (G/C)       |
| 23701       | CakSNP23701    | <i>Kabuli</i>    | Ca_Kabuli_denovo             | 21512410                       | (G/A)       |
| 23702       | CakSNP23702    | <i>Kabuli</i>    | Ca_Kabuli_denovo             | 21512440                       | (T/C)       |
| 23703       | CakSNP23703    | <i>Kabuli</i>    | Ca_Kabuli_denovo             | 21517339                       | (T/C)       |
| 23704       | CakSNP23704    | <i>Kabuli</i>    | Ca_Kabuli_denovo             | 21517364                       | (G/A)       |
| 23705       | CakSNP23705    | <i>Kabuli</i>    | Ca_Kabuli_denovo             | 21521543                       | (T/C)       |
| 23706       | CakSNP23706    | <i>Kabuli</i>    | Ca_Kabuli_denovo             | 21529901                       | (C/T)       |
| 23707       | CakSNP23707    | <i>Kabuli</i>    | Ca_Kabuli_denovo             | 21533729                       | (C/A)       |
| 23708       | CakSNP23708    | <i>Kabuli</i>    | Ca_Kabuli_denovo             | 21536504                       | (G/A)       |
| 23709       | CakSNP23709    | <i>Kabuli</i>    | Ca_Kabuli_denovo             | 21536561                       | (C/G)       |
| 23710       | CakSNP23710    | <i>Kabuli</i>    | Ca_Kabuli_denovo             | 21536878                       | (T/C)       |
| 23711       | CakSNP23711    | <i>Kabuli</i>    | Ca_Kabuli_denovo             | 21541280                       | (C/T)       |

| <b>S.N.</b> | <b>SNP IDs</b> | <b>Cultivars</b> | <b>Chromosomes/scaffolds</b> | <b>Physical positions (bp)</b> | <b>SNPs</b> |
|-------------|----------------|------------------|------------------------------|--------------------------------|-------------|
| 23712       | CakSNP23712    | <i>Kabuli</i>    | Ca_Kabuli_denovo             | 21541298                       | (C/T)       |
| 23713       | CakSNP23713    | <i>Kabuli</i>    | Ca_Kabuli_denovo             | 21541870                       | (T/C)       |
| 23714       | CakSNP23714    | <i>Kabuli</i>    | Ca_Kabuli_denovo             | 21549651                       | (C/G)       |
| 23715       | CakSNP23715    | <i>Kabuli</i>    | Ca_Kabuli_denovo             | 21558166                       | (C/T)       |
| 23716       | CakSNP23716    | <i>Kabuli</i>    | Ca_Kabuli_denovo             | 21559750                       | (A/T)       |
| 23717       | CakSNP23717    | <i>Kabuli</i>    | Ca_Kabuli_denovo             | 21560733                       | (T/G)       |
| 23718       | CakSNP23718    | <i>Kabuli</i>    | Ca_Kabuli_denovo             | 21561543                       | (G/T)       |
| 23719       | CakSNP23719    | <i>Kabuli</i>    | Ca_Kabuli_denovo             | 21565201                       | (A/G)       |
| 23720       | CakSNP23720    | <i>Kabuli</i>    | Ca_Kabuli_denovo             | 21565213                       | (A/T)       |
| 23721       | CakSNP23721    | <i>Kabuli</i>    | Ca_Kabuli_denovo             | 21576483                       | (G/A)       |
| 23722       | CakSNP23722    | <i>Kabuli</i>    | Ca_Kabuli_denovo             | 21577694                       | (T/G)       |
| 23723       | CakSNP23723    | <i>Kabuli</i>    | Ca_Kabuli_denovo             | 21577730                       | (G/A)       |
| 23724       | CakSNP23724    | <i>Kabuli</i>    | Ca_Kabuli_denovo             | 21577736                       | (A/G)       |
| 23725       | CakSNP23725    | <i>Kabuli</i>    | Ca_Kabuli_denovo             | 21577930                       | (G/T)       |
| 23726       | CakSNP23726    | <i>Kabuli</i>    | Ca_Kabuli_denovo             | 21587730                       | (C/A)       |
| 23727       | CakSNP23727    | <i>Kabuli</i>    | Ca_Kabuli_denovo             | 21587742                       | (G/C)       |
| 23728       | CakSNP23728    | <i>Kabuli</i>    | Ca_Kabuli_denovo             | 21588175                       | (C/G)       |
| 23729       | CakSNP23729    | <i>Kabuli</i>    | Ca_Kabuli_denovo             | 21588402                       | (G/T)       |
| 23730       | CakSNP23730    | <i>Kabuli</i>    | Ca_Kabuli_denovo             | 21588479                       | (A/G)       |
| 23731       | CakSNP23731    | <i>Kabuli</i>    | Ca_Kabuli_denovo             | 21589510                       | (C/A)       |
| 23732       | CakSNP23732    | <i>Kabuli</i>    | Ca_Kabuli_denovo             | 21591421                       | (C/T)       |
| 23733       | CakSNP23733    | <i>Kabuli</i>    | Ca_Kabuli_denovo             | 21595077                       | (C/T)       |
| 23734       | CakSNP23734    | <i>Kabuli</i>    | Ca_Kabuli_denovo             | 21595111                       | (C/T)       |
| 23735       | CakSNP23735    | <i>Kabuli</i>    | Ca_Kabuli_denovo             | 21595640                       | (C/G)       |
| 23736       | CakSNP23736    | <i>Kabuli</i>    | Ca_Kabuli_denovo             | 21611670                       | (T/A)       |
| 23737       | CakSNP23737    | <i>Kabuli</i>    | Ca_Kabuli_denovo             | 21611698                       | (T/G)       |
| 23738       | CakSNP23738    | <i>Kabuli</i>    | Ca_Kabuli_denovo             | 21633676                       | (C/T)       |
| 23739       | CakSNP23739    | <i>Kabuli</i>    | Ca_Kabuli_denovo             | 21633691                       | (T/C)       |
| 23740       | CakSNP23740    | <i>Kabuli</i>    | Ca_Kabuli_denovo             | 21651168                       | (C/T)       |
| 23741       | CakSNP23741    | <i>Kabuli</i>    | Ca_Kabuli_denovo             | 21651210                       | (A/G)       |
| 23742       | CakSNP23742    | <i>Kabuli</i>    | Ca_Kabuli_denovo             | 21652622                       | (C/G)       |
| 23743       | CakSNP23743    | <i>Kabuli</i>    | Ca_Kabuli_denovo             | 21655049                       | (A/C)       |
| 23744       | CakSNP23744    | <i>Kabuli</i>    | Ca_Kabuli_denovo             | 21655050                       | (G/C)       |
| 23745       | CakSNP23745    | <i>Kabuli</i>    | Ca_Kabuli_denovo             | 21659196                       | (C/G)       |
| 23746       | CakSNP23746    | <i>Kabuli</i>    | Ca_Kabuli_denovo             | 21664740                       | (T/C)       |
| 23747       | CakSNP23747    | <i>Kabuli</i>    | Ca_Kabuli_denovo             | 21675772                       | (C/T)       |
| 23748       | CakSNP23748    | <i>Kabuli</i>    | Ca_Kabuli_denovo             | 21676093                       | (C/G)       |
| 23749       | CakSNP23749    | <i>Kabuli</i>    | Ca_Kabuli_denovo             | 21676147                       | (T/G)       |

| <b>S.N.</b> | <b>SNP IDs</b> | <b>Cultivars</b> | <b>Chromosomes/scaffolds</b> | <b>Physical positions (bp)</b> | <b>SNPs</b> |
|-------------|----------------|------------------|------------------------------|--------------------------------|-------------|
| 23750       | CakSNP23750    | <i>Kabuli</i>    | Ca_Kabuli_denovo             | 21676158                       | (T/G)       |
| 23751       | CakSNP23751    | <i>Kabuli</i>    | Ca_Kabuli_denovo             | 21683180                       | (A/T)       |
| 23752       | CakSNP23752    | <i>Kabuli</i>    | Ca_Kabuli_denovo             | 21683186                       | (G/A)       |
| 23753       | CakSNP23753    | <i>Kabuli</i>    | Ca_Kabuli_denovo             | 21690203                       | (T/G)       |
| 23754       | CakSNP23754    | <i>Kabuli</i>    | Ca_Kabuli_denovo             | 21691850                       | (T/C)       |
| 23755       | CakSNP23755    | <i>Kabuli</i>    | Ca_Kabuli_denovo             | 21691851                       | (T/C)       |
| 23756       | CakSNP23756    | <i>Kabuli</i>    | Ca_Kabuli_denovo             | 21701022                       | (C/G)       |
| 23757       | CakSNP23757    | <i>Kabuli</i>    | Ca_Kabuli_denovo             | 21702075                       | (G/A)       |
| 23758       | CakSNP23758    | <i>Kabuli</i>    | Ca_Kabuli_denovo             | 21702811                       | (T/G)       |
| 23759       | CakSNP23759    | <i>Kabuli</i>    | Ca_Kabuli_denovo             | 21705038                       | (C/G)       |
| 23760       | CakSNP23760    | <i>Kabuli</i>    | Ca_Kabuli_denovo             | 21707912                       | (C/A)       |
| 23761       | CakSNP23761    | <i>Kabuli</i>    | Ca_Kabuli_denovo             | 21713585                       | (T/C)       |
| 23762       | CakSNP23762    | <i>Kabuli</i>    | Ca_Kabuli_denovo             | 21713624                       | (A/G)       |
| 23763       | CakSNP23763    | <i>Kabuli</i>    | Ca_Kabuli_denovo             | 21717589                       | (T/C)       |
| 23764       | CakSNP23764    | <i>Kabuli</i>    | Ca_Kabuli_denovo             | 21717626                       | (A/G)       |
| 23765       | CakSNP23765    | <i>Kabuli</i>    | Ca_Kabuli_denovo             | 21724227                       | (A/G)       |
| 23766       | CakSNP23766    | <i>Kabuli</i>    | Ca_Kabuli_denovo             | 21724237                       | (T/C)       |
| 23767       | CakSNP23767    | <i>Kabuli</i>    | Ca_Kabuli_denovo             | 21725945                       | (A/C)       |
| 23768       | CakSNP23768    | <i>Kabuli</i>    | Ca_Kabuli_denovo             | 21725951                       | (A/G)       |
| 23769       | CakSNP23769    | <i>Kabuli</i>    | Ca_Kabuli_denovo             | 21726047                       | (C/A)       |
| 23770       | CakSNP23770    | <i>Kabuli</i>    | Ca_Kabuli_denovo             | 21726056                       | (C/T)       |
| 23771       | CakSNP23771    | <i>Kabuli</i>    | Ca_Kabuli_denovo             | 21726967                       | (G/A)       |
| 23772       | CakSNP23772    | <i>Kabuli</i>    | Ca_Kabuli_denovo             | 21729583                       | (A/G)       |
| 23773       | CakSNP23773    | <i>Kabuli</i>    | Ca_Kabuli_denovo             | 21730951                       | (C/T)       |
| 23774       | CakSNP23774    | <i>Kabuli</i>    | Ca_Kabuli_denovo             | 21730966                       | (C/T)       |
| 23775       | CakSNP23775    | <i>Kabuli</i>    | Ca_Kabuli_denovo             | 21745463                       | (A/T)       |
| 23776       | CakSNP23776    | <i>Kabuli</i>    | Ca_Kabuli_denovo             | 21745487                       | (T/C)       |
| 23777       | CakSNP23777    | <i>Kabuli</i>    | Ca_Kabuli_denovo             | 21748246                       | (C/T)       |
| 23778       | CakSNP23778    | <i>Kabuli</i>    | Ca_Kabuli_denovo             | 21748466                       | (G/C)       |
| 23779       | CakSNP23779    | <i>Kabuli</i>    | Ca_Kabuli_denovo             | 21759102                       | (T/G)       |
| 23780       | CakSNP23780    | <i>Kabuli</i>    | Ca_Kabuli_denovo             | 21759330                       | (C/T)       |
| 23781       | CakSNP23781    | <i>Kabuli</i>    | Ca_Kabuli_denovo             | 21759386                       | (C/T)       |
| 23782       | CakSNP23782    | <i>Kabuli</i>    | Ca_Kabuli_denovo             | 21761283                       | (T/C)       |
| 23783       | CakSNP23783    | <i>Kabuli</i>    | Ca_Kabuli_denovo             | 21762479                       | (A/C)       |
| 23784       | CakSNP23784    | <i>Kabuli</i>    | Ca_Kabuli_denovo             | 21764026                       | (C/G)       |
| 23785       | CakSNP23785    | <i>Kabuli</i>    | Ca_Kabuli_denovo             | 21765047                       | (G/A)       |
| 23786       | CakSNP23786    | <i>Kabuli</i>    | Ca_Kabuli_denovo             | 21768651                       | (C/A)       |
| 23787       | CakSNP23787    | <i>Kabuli</i>    | Ca_Kabuli_denovo             | 21768663                       | (G/A)       |

| <b>S.N.</b> | <b>SNP IDs</b> | <b>Cultivars</b> | <b>Chromosomes/scaffolds</b> | <b>Physical positions (bp)</b> | <b>SNPs</b> |
|-------------|----------------|------------------|------------------------------|--------------------------------|-------------|
| 23788       | CakSNP23788    | <i>Kabuli</i>    | Ca_Kabuli_denovo             | 21778525                       | (G/C)       |
| 23789       | CakSNP23789    | <i>Kabuli</i>    | Ca_Kabuli_denovo             | 21778543                       | (A/G)       |
| 23790       | CakSNP23790    | <i>Kabuli</i>    | Ca_Kabuli_denovo             | 21778657                       | (T/C)       |
| 23791       | CakSNP23791    | <i>Kabuli</i>    | Ca_Kabuli_denovo             | 21788450                       | (C/G)       |
| 23792       | CakSNP23792    | <i>Kabuli</i>    | Ca_Kabuli_denovo             | 21788489                       | (A/G)       |
| 23793       | CakSNP23793    | <i>Kabuli</i>    | Ca_Kabuli_denovo             | 21798025                       | (A/C)       |
| 23794       | CakSNP23794    | <i>Kabuli</i>    | Ca_Kabuli_denovo             | 21798919                       | (T/G)       |
| 23795       | CakSNP23795    | <i>Kabuli</i>    | Ca_Kabuli_denovo             | 21800681                       | (A/G)       |
| 23796       | CakSNP23796    | <i>Kabuli</i>    | Ca_Kabuli_denovo             | 21801770                       | (G/T)       |
| 23797       | CakSNP23797    | <i>Kabuli</i>    | Ca_Kabuli_denovo             | 21801797                       | (C/T)       |
| 23798       | CakSNP23798    | <i>Kabuli</i>    | Ca_Kabuli_denovo             | 21804246                       | (G/A)       |
| 23799       | CakSNP23799    | <i>Kabuli</i>    | Ca_Kabuli_denovo             | 21804254                       | (C/G)       |
| 23800       | CakSNP23800    | <i>Kabuli</i>    | Ca_Kabuli_denovo             | 21805673                       | (C/T)       |
| 23801       | CakSNP23801    | <i>Kabuli</i>    | Ca_Kabuli_denovo             | 21807860                       | (G/T)       |
| 23802       | CakSNP23802    | <i>Kabuli</i>    | Ca_Kabuli_denovo             | 21807880                       | (T/G)       |
| 23803       | CakSNP23803    | <i>Kabuli</i>    | Ca_Kabuli_denovo             | 21808391                       | (C/G)       |
| 23804       | CakSNP23804    | <i>Kabuli</i>    | Ca_Kabuli_denovo             | 21811794                       | (A/C)       |
| 23805       | CakSNP23805    | <i>Kabuli</i>    | Ca_Kabuli_denovo             | 21811800                       | (A/G)       |
| 23806       | CakSNP23806    | <i>Kabuli</i>    | Ca_Kabuli_denovo             | 21815122                       | (G/C)       |
| 23807       | CakSNP23807    | <i>Kabuli</i>    | Ca_Kabuli_denovo             | 21815146                       | (G/A)       |
| 23808       | CakSNP23808    | <i>Kabuli</i>    | Ca_Kabuli_denovo             | 21817157                       | (C/T)       |
| 23809       | CakSNP23809    | <i>Kabuli</i>    | Ca_Kabuli_denovo             | 21817167                       | (A/G)       |
| 23810       | CakSNP23810    | <i>Kabuli</i>    | Ca_Kabuli_denovo             | 21818738                       | (T/C)       |
| 23811       | CakSNP23811    | <i>Kabuli</i>    | Ca_Kabuli_denovo             | 21818765                       | (T/C)       |
| 23812       | CakSNP23812    | <i>Kabuli</i>    | Ca_Kabuli_denovo             | 21822406                       | (T/C)       |
| 23813       | CakSNP23813    | <i>Kabuli</i>    | Ca_Kabuli_denovo             | 21822476                       | (A/G)       |
| 23814       | CakSNP23814    | <i>Kabuli</i>    | Ca_Kabuli_denovo             | 21822488                       | (G/C)       |
| 23815       | CakSNP23815    | <i>Kabuli</i>    | Ca_Kabuli_denovo             | 21824609                       | (T/C)       |
| 23816       | CakSNP23816    | <i>Kabuli</i>    | Ca_Kabuli_denovo             | 21824648                       | (C/G)       |
| 23817       | CakSNP23817    | <i>Kabuli</i>    | Ca_Kabuli_denovo             | 21826085                       | (A/G)       |
| 23818       | CakSNP23818    | <i>Kabuli</i>    | Ca_Kabuli_denovo             | 21826147                       | (C/T)       |
| 23819       | CakSNP23819    | <i>Kabuli</i>    | Ca_Kabuli_denovo             | 21827387                       | (A/C)       |
| 23820       | CakSNP23820    | <i>Kabuli</i>    | Ca_Kabuli_denovo             | 21830766                       | (T/C)       |
| 23821       | CakSNP23821    | <i>Kabuli</i>    | Ca_Kabuli_denovo             | 21830792                       | (A/C)       |
| 23822       | CakSNP23822    | <i>Kabuli</i>    | Ca_Kabuli_denovo             | 21832533                       | (G/A)       |
| 23823       | CakSNP23823    | <i>Kabuli</i>    | Ca_Kabuli_denovo             | 21832563                       | (A/G)       |
| 23824       | CakSNP23824    | <i>Kabuli</i>    | Ca_Kabuli_denovo             | 21833724                       | (A/G)       |
| 23825       | CakSNP23825    | <i>Kabuli</i>    | Ca_Kabuli_denovo             | 21833757                       | (C/T)       |

| <b>S.N.</b> | <b>SNP IDs</b> | <b>Cultivars</b> | <b>Chromosomes/scaffolds</b> | <b>Physical positions (bp)</b> | <b>SNPs</b> |
|-------------|----------------|------------------|------------------------------|--------------------------------|-------------|
| 23826       | CakSNP23826    | <i>Kabuli</i>    | Ca_Kabuli_denovo             | 21833915                       | (T/C)       |
| 23827       | CakSNP23827    | <i>Kabuli</i>    | Ca_Kabuli_denovo             | 21839422                       | (A/G)       |
| 23828       | CakSNP23828    | <i>Kabuli</i>    | Ca_Kabuli_denovo             | 21842425                       | (C/T)       |
| 23829       | CakSNP23829    | <i>Kabuli</i>    | Ca_Kabuli_denovo             | 21857124                       | (G/A)       |
| 23830       | CakSNP23830    | <i>Kabuli</i>    | Ca_Kabuli_denovo             | 21860971                       | (C/G)       |
| 23831       | CakSNP23831    | <i>Kabuli</i>    | Ca_Kabuli_denovo             | 21860983                       | (G/T)       |
| 23832       | CakSNP23832    | <i>Kabuli</i>    | Ca_Kabuli_denovo             | 21862785                       | (A/G)       |
| 23833       | CakSNP23833    | <i>Kabuli</i>    | Ca_Kabuli_denovo             | 21863197                       | (T/G)       |
| 23834       | CakSNP23834    | <i>Kabuli</i>    | Ca_Kabuli_denovo             | 21863232                       | (A/G)       |
| 23835       | CakSNP23835    | <i>Kabuli</i>    | Ca_Kabuli_denovo             | 21868496                       | (C/T)       |
| 23836       | CakSNP23836    | <i>Kabuli</i>    | Ca_Kabuli_denovo             | 21876586                       | (T/C)       |
| 23837       | CakSNP23837    | <i>Kabuli</i>    | Ca_Kabuli_denovo             | 21876590                       | (G/C)       |
| 23838       | CakSNP23838    | <i>Kabuli</i>    | Ca_Kabuli_denovo             | 21876611                       | (G/A)       |
| 23839       | CakSNP23839    | <i>Kabuli</i>    | Ca_Kabuli_denovo             | 21880120                       | (C/T)       |
| 23840       | CakSNP23840    | <i>Kabuli</i>    | Ca_Kabuli_denovo             | 21880140                       | (G/C)       |
| 23841       | CakSNP23841    | <i>Kabuli</i>    | Ca_Kabuli_denovo             | 21882551                       | (C/T)       |
| 23842       | CakSNP23842    | <i>Kabuli</i>    | Ca_Kabuli_denovo             | 21883006                       | (C/G)       |
| 23843       | CakSNP23843    | <i>Kabuli</i>    | Ca_Kabuli_denovo             | 21883012                       | (G/T)       |
| 23844       | CakSNP23844    | <i>Kabuli</i>    | Ca_Kabuli_denovo             | 21885351                       | (G/C)       |
| 23845       | CakSNP23845    | <i>Kabuli</i>    | Ca_Kabuli_denovo             | 21886844                       | (G/A)       |
| 23846       | CakSNP23846    | <i>Kabuli</i>    | Ca_Kabuli_denovo             | 21886849                       | (C/T)       |
| 23847       | CakSNP23847    | <i>Kabuli</i>    | Ca_Kabuli_denovo             | 21888586                       | (G/A)       |
| 23848       | CakSNP23848    | <i>Kabuli</i>    | Ca_Kabuli_denovo             | 21893756                       | (C/T)       |
| 23849       | CakSNP23849    | <i>Kabuli</i>    | Ca_Kabuli_denovo             | 21894934                       | (T/C)       |
| 23850       | CakSNP23850    | <i>Kabuli</i>    | Ca_Kabuli_denovo             | 21894955                       | (A/G)       |
| 23851       | CakSNP23851    | <i>Kabuli</i>    | Ca_Kabuli_denovo             | 21898260                       | (G/A)       |
| 23852       | CakSNP23852    | <i>Kabuli</i>    | Ca_Kabuli_denovo             | 21898280                       | (A/G)       |
| 23853       | CakSNP23853    | <i>Kabuli</i>    | Ca_Kabuli_denovo             | 21903472                       | (C/G)       |
| 23854       | CakSNP23854    | <i>Kabuli</i>    | Ca_Kabuli_denovo             | 21903496                       | (T/C)       |
| 23855       | CakSNP23855    | <i>Kabuli</i>    | Ca_Kabuli_denovo             | 21905287                       | (A/G)       |
| 23856       | CakSNP23856    | <i>Kabuli</i>    | Ca_Kabuli_denovo             | 21905310                       | (G/A)       |
| 23857       | CakSNP23857    | <i>Kabuli</i>    | Ca_Kabuli_denovo             | 21907451                       | (A/C)       |
| 23858       | CakSNP23858    | <i>Kabuli</i>    | Ca_Kabuli_denovo             | 21907453                       | (A/C)       |
| 23859       | CakSNP23859    | <i>Kabuli</i>    | Ca_Kabuli_denovo             | 21913758                       | (T/C)       |
| 23860       | CakSNP23860    | <i>Kabuli</i>    | Ca_Kabuli_denovo             | 21915275                       | (G/A)       |
| 23861       | CakSNP23861    | <i>Kabuli</i>    | Ca_Kabuli_denovo             | 21915344                       | (A/T)       |
| 23862       | CakSNP23862    | <i>Kabuli</i>    | Ca_Kabuli_denovo             | 21916354                       | (G/C)       |
| 23863       | CakSNP23863    | <i>Kabuli</i>    | Ca_Kabuli_denovo             | 21916363                       | (G/C)       |

| <b>S.N.</b> | <b>SNP IDs</b> | <b>Cultivars</b> | <b>Chromosomes/scaffolds</b> | <b>Physical positions (bp)</b> | <b>SNPs</b> |
|-------------|----------------|------------------|------------------------------|--------------------------------|-------------|
| 23864       | CakSNP23864    | <i>Kabuli</i>    | Ca_Kabuli_denovo             | 21917642                       | (C/T)       |
| 23865       | CakSNP23865    | <i>Kabuli</i>    | Ca_Kabuli_denovo             | 21923496                       | (C/T)       |
| 23866       | CakSNP23866    | <i>Kabuli</i>    | Ca_Kabuli_denovo             | 21926068                       | (G/A)       |
| 23867       | CakSNP23867    | <i>Kabuli</i>    | Ca_Kabuli_denovo             | 21929425                       | (G/A)       |
| 23868       | CakSNP23868    | <i>Kabuli</i>    | Ca_Kabuli_denovo             | 21931570                       | (C/T)       |
| 23869       | CakSNP23869    | <i>Kabuli</i>    | Ca_Kabuli_denovo             | 21931574                       | (C/G)       |
| 23870       | CakSNP23870    | <i>Kabuli</i>    | Ca_Kabuli_denovo             | 21933266                       | (G/C)       |
| 23871       | CakSNP23871    | <i>Kabuli</i>    | Ca_Kabuli_denovo             | 21943045                       | (C/T)       |
| 23872       | CakSNP23872    | <i>Kabuli</i>    | Ca_Kabuli_denovo             | 21943062                       | (C/T)       |
| 23873       | CakSNP23873    | <i>Kabuli</i>    | Ca_Kabuli_denovo             | 21944105                       | (T/G)       |
| 23874       | CakSNP23874    | <i>Kabuli</i>    | Ca_Kabuli_denovo             | 21947457                       | (T/C)       |
| 23875       | CakSNP23875    | <i>Kabuli</i>    | Ca_Kabuli_denovo             | 21959356                       | (C/T)       |
| 23876       | CakSNP23876    | <i>Kabuli</i>    | Ca_Kabuli_denovo             | 21959383                       | (T/C)       |
| 23877       | CakSNP23877    | <i>Kabuli</i>    | Ca_Kabuli_denovo             | 21959872                       | (G/T)       |
| 23878       | CakSNP23878    | <i>Kabuli</i>    | Ca_Kabuli_denovo             | 21968331                       | (A/G)       |
| 23879       | CakSNP23879    | <i>Kabuli</i>    | Ca_Kabuli_denovo             | 21968856                       | (T/C)       |
| 23880       | CakSNP23880    | <i>Kabuli</i>    | Ca_Kabuli_denovo             | 21968860                       | (A/G)       |
| 23881       | CakSNP23881    | <i>Kabuli</i>    | Ca_Kabuli_denovo             | 21976577                       | (G/A)       |
| 23882       | CakSNP23882    | <i>Kabuli</i>    | Ca_Kabuli_denovo             | 21976623                       | (C/A)       |
| 23883       | CakSNP23883    | <i>Kabuli</i>    | Ca_Kabuli_denovo             | 21978703                       | (A/C)       |
| 23884       | CakSNP23884    | <i>Kabuli</i>    | Ca_Kabuli_denovo             | 21978727                       | (A/C)       |
| 23885       | CakSNP23885    | <i>Kabuli</i>    | Ca_Kabuli_denovo             | 21983999                       | (A/G)       |
| 23886       | CakSNP23886    | <i>Kabuli</i>    | Ca_Kabuli_denovo             | 21984023                       | (A/G)       |
| 23887       | CakSNP23887    | <i>Kabuli</i>    | Ca_Kabuli_denovo             | 21984026                       | (G/A)       |
| 23888       | CakSNP23888    | <i>Kabuli</i>    | Ca_Kabuli_denovo             | 21984665                       | (A/T)       |
| 23889       | CakSNP23889    | <i>Kabuli</i>    | Ca_Kabuli_denovo             | 21984673                       | (T/C)       |
| 23890       | CakSNP23890    | <i>Kabuli</i>    | Ca_Kabuli_denovo             | 21984871                       | (A/G)       |
| 23891       | CakSNP23891    | <i>Kabuli</i>    | Ca_Kabuli_denovo             | 21984916                       | (A/G)       |
| 23892       | CakSNP23892    | <i>Kabuli</i>    | Ca_Kabuli_denovo             | 21993694                       | (A/G)       |
| 23893       | CakSNP23893    | <i>Kabuli</i>    | Ca_Kabuli_denovo             | 21993700                       | (A/C)       |
| 23894       | CakSNP23894    | <i>Kabuli</i>    | Ca_Kabuli_denovo             | 21995519                       | (T/G)       |
| 23895       | CakSNP23895    | <i>Kabuli</i>    | Ca_Kabuli_denovo             | 21999081                       | (C/G)       |
| 23896       | CakSNP23896    | <i>Kabuli</i>    | Ca_Kabuli_denovo             | 21999091                       | (G/T)       |
| 23897       | CakSNP23897    | <i>Kabuli</i>    | Ca_Kabuli_denovo             | 22001325                       | (C/A)       |
| 23898       | CakSNP23898    | <i>Kabuli</i>    | Ca_Kabuli_denovo             | 22001329                       | (G/A)       |
| 23899       | CakSNP23899    | <i>Kabuli</i>    | Ca_Kabuli_denovo             | 22003126                       | (A/G)       |
| 23900       | CakSNP23900    | <i>Kabuli</i>    | Ca_Kabuli_denovo             | 22005228                       | (A/G)       |
| 23901       | CakSNP23901    | <i>Kabuli</i>    | Ca_Kabuli_denovo             | 22010799                       | (C/A)       |

| <b>S.N.</b> | <b>SNP IDs</b> | <b>Cultivars</b> | <b>Chromosomes/scaffolds</b> | <b>Physical positions (bp)</b> | <b>SNPs</b> |
|-------------|----------------|------------------|------------------------------|--------------------------------|-------------|
| 23902       | CakSNP23902    | <i>Kabuli</i>    | Ca_Kabuli_denovo             | 22010803                       | (A/C)       |
| 23903       | CakSNP23903    | <i>Kabuli</i>    | Ca_Kabuli_denovo             | 22011716                       | (T/G)       |
| 23904       | CakSNP23904    | <i>Kabuli</i>    | Ca_Kabuli_denovo             | 22011794                       | (C/T)       |
| 23905       | CakSNP23905    | <i>Kabuli</i>    | Ca_Kabuli_denovo             | 22016922                       | (A/C)       |
| 23906       | CakSNP23906    | <i>Kabuli</i>    | Ca_Kabuli_denovo             | 22020149                       | (C/T)       |
| 23907       | CakSNP23907    | <i>Kabuli</i>    | Ca_Kabuli_denovo             | 22020151                       | (G/A)       |
| 23908       | CakSNP23908    | <i>Kabuli</i>    | Ca_Kabuli_denovo             | 22026815                       | (G/A)       |
| 23909       | CakSNP23909    | <i>Kabuli</i>    | Ca_Kabuli_denovo             | 22027645                       | (C/T)       |
| 23910       | CakSNP23910    | <i>Kabuli</i>    | Ca_Kabuli_denovo             | 22028368                       | (C/T)       |
| 23911       | CakSNP23911    | <i>Kabuli</i>    | Ca_Kabuli_denovo             | 22028371                       | (A/G)       |
| 23912       | CakSNP23912    | <i>Kabuli</i>    | Ca_Kabuli_denovo             | 22028386                       | (T/C)       |
| 23913       | CakSNP23913    | <i>Kabuli</i>    | Ca_Kabuli_denovo             | 22028745                       | (T/G)       |
| 23914       | CakSNP23914    | <i>Kabuli</i>    | Ca_Kabuli_denovo             | 22031438                       | (T/G)       |
| 23915       | CakSNP23915    | <i>Kabuli</i>    | Ca_Kabuli_denovo             | 22040585                       | (G/T)       |
| 23916       | CakSNP23916    | <i>Kabuli</i>    | Ca_Kabuli_denovo             | 22044687                       | (C/T)       |
| 23917       | CakSNP23917    | <i>Kabuli</i>    | Ca_Kabuli_denovo             | 22048634                       | (C/A)       |
| 23918       | CakSNP23918    | <i>Kabuli</i>    | Ca_Kabuli_denovo             | 22048658                       | (G/A)       |
| 23919       | CakSNP23919    | <i>Kabuli</i>    | Ca_Kabuli_denovo             | 22054161                       | (A/G)       |
| 23920       | CakSNP23920    | <i>Kabuli</i>    | Ca_Kabuli_denovo             | 22057228                       | (T/C)       |
| 23921       | CakSNP23921    | <i>Kabuli</i>    | Ca_Kabuli_denovo             | 22059344                       | (C/G)       |
| 23922       | CakSNP23922    | <i>Kabuli</i>    | Ca_Kabuli_denovo             | 22059356                       | (A/G)       |
| 23923       | CakSNP23923    | <i>Kabuli</i>    | Ca_Kabuli_denovo             | 22070684                       | (T/G)       |
| 23924       | CakSNP23924    | <i>Kabuli</i>    | Ca_Kabuli_denovo             | 22071511                       | (G/A)       |
| 23925       | CakSNP23925    | <i>Kabuli</i>    | Ca_Kabuli_denovo             | 22072977                       | (T/G)       |
| 23926       | CakSNP23926    | <i>Kabuli</i>    | Ca_Kabuli_denovo             | 22074563                       | (A/T)       |
| 23927       | CakSNP23927    | <i>Kabuli</i>    | Ca_Kabuli_denovo             | 22078330                       | (T/C)       |
| 23928       | CakSNP23928    | <i>Kabuli</i>    | Ca_Kabuli_denovo             | 22078518                       | (T/C)       |
| 23929       | CakSNP23929    | <i>Kabuli</i>    | Ca_Kabuli_denovo             | 22078563                       | (G/C)       |
| 23930       | CakSNP23930    | <i>Kabuli</i>    | Ca_Kabuli_denovo             | 22082588                       | (T/C)       |
| 23931       | CakSNP23931    | <i>Kabuli</i>    | Ca_Kabuli_denovo             | 22082621                       | (C/T)       |
| 23932       | CakSNP23932    | <i>Kabuli</i>    | Ca_Kabuli_denovo             | 22083454                       | (C/T)       |
| 23933       | CakSNP23933    | <i>Kabuli</i>    | Ca_Kabuli_denovo             | 22086659                       | (T/G)       |
| 23934       | CakSNP23934    | <i>Kabuli</i>    | Ca_Kabuli_denovo             | 22093836                       | (G/A)       |
| 23935       | CakSNP23935    | <i>Kabuli</i>    | Ca_Kabuli_denovo             | 22095169                       | (C/T)       |
| 23936       | CakSNP23936    | <i>Kabuli</i>    | Ca_Kabuli_denovo             | 22099049                       | (A/T)       |
| 23937       | CakSNP23937    | <i>Kabuli</i>    | Ca_Kabuli_denovo             | 22099091                       | (G/A)       |
| 23938       | CakSNP23938    | <i>Kabuli</i>    | Ca_Kabuli_denovo             | 22105626                       | (T/C)       |
| 23939       | CakSNP23939    | <i>Kabuli</i>    | Ca_Kabuli_denovo             | 22109925                       | (C/G)       |



| <b>S.N.</b> | <b>SNP IDs</b> | <b>Cultivars</b> | <b>Chromosomes/scaffolds</b> | <b>Physical positions (bp)</b> | <b>SNPs</b> |
|-------------|----------------|------------------|------------------------------|--------------------------------|-------------|
| 23940       | CakSNP23940    | <i>Kabuli</i>    | Ca_Kabuli_denovo             | 22109955                       | (T/C)       |
| 23941       | CakSNP23941    | <i>Kabuli</i>    | Ca_Kabuli_denovo             | 22115972                       | (C/G)       |
| 23942       | CakSNP23942    | <i>Kabuli</i>    | Ca_Kabuli_denovo             | 22127527                       | (C/G)       |
| 23943       | CakSNP23943    | <i>Kabuli</i>    | Ca_Kabuli_denovo             | 22145936                       | (C/A)       |
| 23944       | CakSNP23944    | <i>Kabuli</i>    | Ca_Kabuli_denovo             | 22145951                       | (A/G)       |
| 23945       | CakSNP23945    | <i>Kabuli</i>    | Ca_Kabuli_denovo             | 22147873                       | (A/G)       |
| 23946       | CakSNP23946    | <i>Kabuli</i>    | Ca_Kabuli_denovo             | 22150196                       | (A/G)       |
| 23947       | CakSNP23947    | <i>Kabuli</i>    | Ca_Kabuli_denovo             | 22150199                       | (G/C)       |
| 23948       | CakSNP23948    | <i>Kabuli</i>    | Ca_Kabuli_denovo             | 22154593                       | (C/T)       |
| 23949       | CakSNP23949    | <i>Kabuli</i>    | Ca_Kabuli_denovo             | 22155073                       | (T/A)       |
| 23950       | CakSNP23950    | <i>Kabuli</i>    | Ca_Kabuli_denovo             | 22155343                       | (G/C)       |
| 23951       | CakSNP23951    | <i>Kabuli</i>    | Ca_Kabuli_denovo             | 22155358                       | (C/A)       |
| 23952       | CakSNP23952    | <i>Kabuli</i>    | Ca_Kabuli_denovo             | 22156352                       | (G/A)       |
| 23953       | CakSNP23953    | <i>Kabuli</i>    | Ca_Kabuli_denovo             | 22156384                       | (C/G)       |
| 23954       | CakSNP23954    | <i>Kabuli</i>    | Ca_Kabuli_denovo             | 22162484                       | (A/G)       |
| 23955       | CakSNP23955    | <i>Kabuli</i>    | Ca_Kabuli_denovo             | 22166305                       | (T/C)       |
| 23956       | CakSNP23956    | <i>Kabuli</i>    | Ca_Kabuli_denovo             | 22175865                       | (C/T)       |
| 23957       | CakSNP23957    | <i>Kabuli</i>    | Ca_Kabuli_denovo             | 22175884                       | (T/C)       |
| 23958       | CakSNP23958    | <i>Kabuli</i>    | Ca_Kabuli_denovo             | 22177441                       | (A/C)       |
| 23959       | CakSNP23959    | <i>Kabuli</i>    | Ca_Kabuli_denovo             | 22177732                       | (T/C)       |
| 23960       | CakSNP23960    | <i>Kabuli</i>    | Ca_Kabuli_denovo             | 22177762                       | (T/C)       |
| 23961       | CakSNP23961    | <i>Kabuli</i>    | Ca_Kabuli_denovo             | 22185743                       | (C/T)       |
| 23962       | CakSNP23962    | <i>Kabuli</i>    | Ca_Kabuli_denovo             | 22185763                       | (T/G)       |
| 23963       | CakSNP23963    | <i>Kabuli</i>    | Ca_Kabuli_denovo             | 22187682                       | (T/C)       |
| 23964       | CakSNP23964    | <i>Kabuli</i>    | Ca_Kabuli_denovo             | 22187734                       | (G/T)       |
| 23965       | CakSNP23965    | <i>Kabuli</i>    | Ca_Kabuli_denovo             | 22191206                       | (C/A)       |
| 23966       | CakSNP23966    | <i>Kabuli</i>    | Ca_Kabuli_denovo             | 22191233                       | (G/C)       |
| 23967       | CakSNP23967    | <i>Kabuli</i>    | Ca_Kabuli_denovo             | 22194019                       | (T/C)       |
| 23968       | CakSNP23968    | <i>Kabuli</i>    | Ca_Kabuli_denovo             | 22194078                       | (G/C)       |
| 23969       | CakSNP23969    | <i>Kabuli</i>    | Ca_Kabuli_denovo             | 22199275                       | (T/C)       |
| 23970       | CakSNP23970    | <i>Kabuli</i>    | Ca_Kabuli_denovo             | 22204436                       | (G/A)       |
| 23971       | CakSNP23971    | <i>Kabuli</i>    | Ca_Kabuli_denovo             | 22204475                       | (A/G)       |
| 23972       | CakSNP23972    | <i>Kabuli</i>    | Ca_Kabuli_denovo             | 22206003                       | (G/A)       |
| 23973       | CakSNP23973    | <i>Kabuli</i>    | Ca_Kabuli_denovo             | 22210115                       | (C/G)       |
| 23974       | CakSNP23974    | <i>Kabuli</i>    | Ca_Kabuli_denovo             | 22213095                       | (C/A)       |
| 23975       | CakSNP23975    | <i>Kabuli</i>    | Ca_Kabuli_denovo             | 22213116                       | (A/G)       |
| 23976       | CakSNP23976    | <i>Kabuli</i>    | Ca_Kabuli_denovo             | 22213901                       | (T/C)       |
| 23977       | CakSNP23977    | <i>Kabuli</i>    | Ca_Kabuli_denovo             | 22213930                       | (G/C)       |

| <b>S.N.</b> | <b>SNP IDs</b> | <b>Cultivars</b> | <b>Chromosomes/scaffolds</b> | <b>Physical positions (bp)</b> | <b>SNPs</b> |
|-------------|----------------|------------------|------------------------------|--------------------------------|-------------|
| 23978       | CakSNP23978    | <i>Kabuli</i>    | Ca_Kabuli_denovo             | 22216043                       | (A/G)       |
| 23979       | CakSNP23979    | <i>Kabuli</i>    | Ca_Kabuli_denovo             | 22223582                       | (G/A)       |
| 23980       | CakSNP23980    | <i>Kabuli</i>    | Ca_Kabuli_denovo             | 22223614                       | (T/C)       |
| 23981       | CakSNP23981    | <i>Kabuli</i>    | Ca_Kabuli_denovo             | 22223700                       | (T/A)       |
| 23982       | CakSNP23982    | <i>Kabuli</i>    | Ca_Kabuli_denovo             | 22223707                       | (A/C)       |
| 23983       | CakSNP23983    | <i>Kabuli</i>    | Ca_Kabuli_denovo             | 22224352                       | (G/T)       |
| 23984       | CakSNP23984    | <i>Kabuli</i>    | Ca_Kabuli_denovo             | 22224391                       | (G/T)       |
| 23985       | CakSNP23985    | <i>Kabuli</i>    | Ca_Kabuli_denovo             | 22236255                       | (C/T)       |
| 23986       | CakSNP23986    | <i>Kabuli</i>    | Ca_Kabuli_denovo             | 22236273                       | (T/G)       |
| 23987       | CakSNP23987    | <i>Kabuli</i>    | Ca_Kabuli_denovo             | 22237102                       | (G/A)       |
| 23988       | CakSNP23988    | <i>Kabuli</i>    | Ca_Kabuli_denovo             | 22242259                       | (C/T)       |
| 23989       | CakSNP23989    | <i>Kabuli</i>    | Ca_Kabuli_denovo             | 22242265                       | (C/T)       |
| 23990       | CakSNP23990    | <i>Kabuli</i>    | Ca_Kabuli_denovo             | 22258645                       | (A/G)       |
| 23991       | CakSNP23991    | <i>Kabuli</i>    | Ca_Kabuli_denovo             | 22266067                       | (G/C)       |
| 23992       | CakSNP23992    | <i>Kabuli</i>    | Ca_Kabuli_denovo             | 22274978                       | (T/C)       |
| 23993       | CakSNP23993    | <i>Kabuli</i>    | Ca_Kabuli_denovo             | 22277631                       | (G/C)       |
| 23994       | CakSNP23994    | <i>Kabuli</i>    | Ca_Kabuli_denovo             | 22277682                       | (C/T)       |
| 23995       | CakSNP23995    | <i>Kabuli</i>    | Ca_Kabuli_denovo             | 22279871                       | (C/A)       |
| 23996       | CakSNP23996    | <i>Kabuli</i>    | Ca_Kabuli_denovo             | 22279916                       | (C/T)       |
| 23997       | CakSNP23997    | <i>Kabuli</i>    | Ca_Kabuli_denovo             | 22280798                       | (G/A)       |
| 23998       | CakSNP23998    | <i>Kabuli</i>    | Ca_Kabuli_denovo             | 22288948                       | (T/C)       |
| 23999       | CakSNP23999    | <i>Kabuli</i>    | Ca_Kabuli_denovo             | 22290167                       | (C/A)       |
| 24000       | CakSNP24000    | <i>Kabuli</i>    | Ca_Kabuli_denovo             | 22290169                       | (A/G)       |
| 24001       | CakSNP24001    | <i>Kabuli</i>    | Ca_Kabuli_denovo             | 22297049                       | (C/A)       |
| 24002       | CakSNP24002    | <i>Kabuli</i>    | Ca_Kabuli_denovo             | 22297053                       | (G/C)       |
| 24003       | CakSNP24003    | <i>Kabuli</i>    | Ca_Kabuli_denovo             | 22297315                       | (T/C)       |
| 24004       | CakSNP24004    | <i>Kabuli</i>    | Ca_Kabuli_denovo             | 22297334                       | (A/G)       |
| 24005       | CakSNP24005    | <i>Kabuli</i>    | Ca_Kabuli_denovo             | 22302898                       | (G/A)       |
| 24006       | CakSNP24006    | <i>Kabuli</i>    | Ca_Kabuli_denovo             | 22309863                       | (A/C)       |
| 24007       | CakSNP24007    | <i>Kabuli</i>    | Ca_Kabuli_denovo             | 22315446                       | (A/T)       |
| 24008       | CakSNP24008    | <i>Kabuli</i>    | Ca_Kabuli_denovo             | 22315449                       | (A/C)       |
| 24009       | CakSNP24009    | <i>Kabuli</i>    | Ca_Kabuli_denovo             | 22324880                       | (T/G)       |
| 24010       | CakSNP24010    | <i>Kabuli</i>    | Ca_Kabuli_denovo             | 22324883                       | (G/A)       |
| 24011       | CakSNP24011    | <i>Kabuli</i>    | Ca_Kabuli_denovo             | 22328246                       | (A/G)       |
| 24012       | CakSNP24012    | <i>Kabuli</i>    | Ca_Kabuli_denovo             | 22328273                       | (C/T)       |
| 24013       | CakSNP24013    | <i>Kabuli</i>    | Ca_Kabuli_denovo             | 22332214                       | (G/T)       |
| 24014       | CakSNP24014    | <i>Kabuli</i>    | Ca_Kabuli_denovo             | 22337605                       | (C/A)       |
| 24015       | CakSNP24015    | <i>Kabuli</i>    | Ca_Kabuli_denovo             | 22340311                       | (C/A)       |

| <b>S.N.</b> | <b>SNP IDs</b> | <b>Cultivars</b> | <b>Chromosomes/scaffolds</b> | <b>Physical positions (bp)</b> | <b>SNPs</b> |
|-------------|----------------|------------------|------------------------------|--------------------------------|-------------|
| 24016       | CakSNP24016    | <i>Kabuli</i>    | Ca_Kabuli_denovo             | 22340317                       | (T/G)       |
| 24017       | CakSNP24017    | <i>Kabuli</i>    | Ca_Kabuli_denovo             | 22342839                       | (G/C)       |
| 24018       | CakSNP24018    | <i>Kabuli</i>    | Ca_Kabuli_denovo             | 22343917                       | (T/C)       |
| 24019       | CakSNP24019    | <i>Kabuli</i>    | Ca_Kabuli_denovo             | 22343947                       | (A/C)       |
| 24020       | CakSNP24020    | <i>Kabuli</i>    | Ca_Kabuli_denovo             | 22344811                       | (T/C)       |
| 24021       | CakSNP24021    | <i>Kabuli</i>    | Ca_Kabuli_denovo             | 22347675                       | (T/C)       |
| 24022       | CakSNP24022    | <i>Kabuli</i>    | Ca_Kabuli_denovo             | 22355630                       | (A/G)       |
| 24023       | CakSNP24023    | <i>Kabuli</i>    | Ca_Kabuli_denovo             | 22355651                       | (A/C)       |
| 24024       | CakSNP24024    | <i>Kabuli</i>    | Ca_Kabuli_denovo             | 22356787                       | (T/C)       |
| 24025       | CakSNP24025    | <i>Kabuli</i>    | Ca_Kabuli_denovo             | 22359477                       | (T/A)       |
| 24026       | CakSNP24026    | <i>Kabuli</i>    | Ca_Kabuli_denovo             | 22364608                       | (C/T)       |
| 24027       | CakSNP24027    | <i>Kabuli</i>    | Ca_Kabuli_denovo             | 22370629                       | (G/A)       |
| 24028       | CakSNP24028    | <i>Kabuli</i>    | Ca_Kabuli_denovo             | 22370640                       | (C/T)       |
| 24029       | CakSNP24029    | <i>Kabuli</i>    | Ca_Kabuli_denovo             | 22379899                       | (G/C)       |
| 24030       | CakSNP24030    | <i>Kabuli</i>    | Ca_Kabuli_denovo             | 22383680                       | (A/G)       |
| 24031       | CakSNP24031    | <i>Kabuli</i>    | Ca_Kabuli_denovo             | 22384415                       | (A/C)       |
| 24032       | CakSNP24032    | <i>Kabuli</i>    | Ca_Kabuli_denovo             | 22388447                       | (T/G)       |
| 24033       | CakSNP24033    | <i>Kabuli</i>    | Ca_Kabuli_denovo             | 22390212                       | (A/C)       |
| 24034       | CakSNP24034    | <i>Kabuli</i>    | Ca_Kabuli_denovo             | 22390214                       | (A/C)       |
| 24035       | CakSNP24035    | <i>Kabuli</i>    | Ca_Kabuli_denovo             | 22396027                       | (G/A)       |
| 24036       | CakSNP24036    | <i>Kabuli</i>    | Ca_Kabuli_denovo             | 22399918                       | (G/C)       |
| 24037       | CakSNP24037    | <i>Kabuli</i>    | Ca_Kabuli_denovo             | 22402729                       | (A/G)       |
| 24038       | CakSNP24038    | <i>Kabuli</i>    | Ca_Kabuli_denovo             | 22409040                       | (G/A)       |
| 24039       | CakSNP24039    | <i>Kabuli</i>    | Ca_Kabuli_denovo             | 22409090                       | (T/G)       |
| 24040       | CakSNP24040    | <i>Kabuli</i>    | Ca_Kabuli_denovo             | 22415065                       | (A/G)       |
| 24041       | CakSNP24041    | <i>Kabuli</i>    | Ca_Kabuli_denovo             | 22415068                       | (T/C)       |
| 24042       | CakSNP24042    | <i>Kabuli</i>    | Ca_Kabuli_denovo             | 22421870                       | (G/A)       |
| 24043       | CakSNP24043    | <i>Kabuli</i>    | Ca_Kabuli_denovo             | 22423241                       | (C/G)       |
| 24044       | CakSNP24044    | <i>Kabuli</i>    | Ca_Kabuli_denovo             | 22423263                       | (G/T)       |
| 24045       | CakSNP24045    | <i>Kabuli</i>    | Ca_Kabuli_denovo             | 22424926                       | (G/C)       |
| 24046       | CakSNP24046    | <i>Kabuli</i>    | Ca_Kabuli_denovo             | 22426360                       | (C/G)       |
| 24047       | CakSNP24047    | <i>Kabuli</i>    | Ca_Kabuli_denovo             | 22427046                       | (A/T)       |
| 24048       | CakSNP24048    | <i>Kabuli</i>    | Ca_Kabuli_denovo             | 22431626                       | (C/A)       |
| 24049       | CakSNP24049    | <i>Kabuli</i>    | Ca_Kabuli_denovo             | 22431652                       | (C/T)       |
| 24050       | CakSNP24050    | <i>Kabuli</i>    | Ca_Kabuli_denovo             | 22432380                       | (C/T)       |
| 24051       | CakSNP24051    | <i>Kabuli</i>    | Ca_Kabuli_denovo             | 22432382                       | (C/G)       |
| 24052       | CakSNP24052    | <i>Kabuli</i>    | Ca_Kabuli_denovo             | 22433280                       | (G/A)       |
| 24053       | CakSNP24053    | <i>Kabuli</i>    | Ca_Kabuli_denovo             | 22433295                       | (A/G)       |

| <b>S.N.</b> | <b>SNP IDs</b> | <b>Cultivars</b> | <b>Chromosomes/scaffolds</b> | <b>Physical positions (bp)</b> | <b>SNPs</b> |
|-------------|----------------|------------------|------------------------------|--------------------------------|-------------|
| 24054       | CakSNP24054    | <i>Kabuli</i>    | Ca_Kabuli_denovo             | 22436951                       | (C/G)       |
| 24055       | CakSNP24055    | <i>Kabuli</i>    | Ca_Kabuli_denovo             | 22436975                       | (T/G)       |
| 24056       | CakSNP24056    | <i>Kabuli</i>    | Ca_Kabuli_denovo             | 22439163                       | (C/T)       |
| 24057       | CakSNP24057    | <i>Kabuli</i>    | Ca_Kabuli_denovo             | 22443182                       | (T/C)       |
| 24058       | CakSNP24058    | <i>Kabuli</i>    | Ca_Kabuli_denovo             | 22444030                       | (C/G)       |
| 24059       | CakSNP24059    | <i>Kabuli</i>    | Ca_Kabuli_denovo             | 22449467                       | (G/T)       |
| 24060       | CakSNP24060    | <i>Kabuli</i>    | Ca_Kabuli_denovo             | 22449512                       | (C/G)       |
| 24061       | CakSNP24061    | <i>Kabuli</i>    | Ca_Kabuli_denovo             | 22450397                       | (C/G)       |
| 24062       | CakSNP24062    | <i>Kabuli</i>    | Ca_Kabuli_denovo             | 22451704                       | (C/T)       |
| 24063       | CakSNP24063    | <i>Kabuli</i>    | Ca_Kabuli_denovo             | 22452438                       | (A/G)       |
| 24064       | CakSNP24064    | <i>Kabuli</i>    | Ca_Kabuli_denovo             | 22452449                       | (C/G)       |
| 24065       | CakSNP24065    | <i>Kabuli</i>    | Ca_Kabuli_denovo             | 22453019                       | (T/C)       |
| 24066       | CakSNP24066    | <i>Kabuli</i>    | Ca_Kabuli_denovo             | 22453049                       | (A/G)       |
| 24067       | CakSNP24067    | <i>Kabuli</i>    | Ca_Kabuli_denovo             | 22453067                       | (G/A)       |
| 24068       | CakSNP24068    | <i>Kabuli</i>    | Ca_Kabuli_denovo             | 22454097                       | (A/G)       |
| 24069       | CakSNP24069    | <i>Kabuli</i>    | Ca_Kabuli_denovo             | 22454100                       | (G/A)       |
| 24070       | CakSNP24070    | <i>Kabuli</i>    | Ca_Kabuli_denovo             | 22462238                       | (C/G)       |
| 24071       | CakSNP24071    | <i>Kabuli</i>    | Ca_Kabuli_denovo             | 22462279                       | (T/C)       |
| 24072       | CakSNP24072    | <i>Kabuli</i>    | Ca_Kabuli_denovo             | 22463261                       | (G/C)       |
| 24073       | CakSNP24073    | <i>Kabuli</i>    | Ca_Kabuli_denovo             | 22464550                       | (C/A)       |
| 24074       | CakSNP24074    | <i>Kabuli</i>    | Ca_Kabuli_denovo             | 22464930                       | (T/C)       |
| 24075       | CakSNP24075    | <i>Kabuli</i>    | Ca_Kabuli_denovo             | 22464938                       | (G/C)       |
| 24076       | CakSNP24076    | <i>Kabuli</i>    | Ca_Kabuli_denovo             | 22465107                       | (T/C)       |
| 24077       | CakSNP24077    | <i>Kabuli</i>    | Ca_Kabuli_denovo             | 22465162                       | (A/G)       |
| 24078       | CakSNP24078    | <i>Kabuli</i>    | Ca_Kabuli_denovo             | 22466096                       | (G/T)       |
| 24079       | CakSNP24079    | <i>Kabuli</i>    | Ca_Kabuli_denovo             | 22476717                       | (A/C)       |
| 24080       | CakSNP24080    | <i>Kabuli</i>    | Ca_Kabuli_denovo             | 22476744                       | (T/C)       |
| 24081       | CakSNP24081    | <i>Kabuli</i>    | Ca_Kabuli_denovo             | 22479050                       | (A/G)       |
| 24082       | CakSNP24082    | <i>Kabuli</i>    | Ca_Kabuli_denovo             | 22479122                       | (T/C)       |
| 24083       | CakSNP24083    | <i>Kabuli</i>    | Ca_Kabuli_denovo             | 22480360                       | (C/T)       |
| 24084       | CakSNP24084    | <i>Kabuli</i>    | Ca_Kabuli_denovo             | 22480405                       | (C/T)       |
| 24085       | CakSNP24085    | <i>Kabuli</i>    | Ca_Kabuli_denovo             | 22486514                       | (G/A)       |
| 24086       | CakSNP24086    | <i>Kabuli</i>    | Ca_Kabuli_denovo             | 22486522                       | (C/T)       |
| 24087       | CakSNP24087    | <i>Kabuli</i>    | Ca_Kabuli_denovo             | 22493767                       | (T/C)       |
| 24088       | CakSNP24088    | <i>Kabuli</i>    | Ca_Kabuli_denovo             | 22504660                       | (C/T)       |
| 24089       | CakSNP24089    | <i>Kabuli</i>    | Ca_Kabuli_denovo             | 22514807                       | (C/A)       |
| 24090       | CakSNP24090    | <i>Kabuli</i>    | Ca_Kabuli_denovo             | 22516434                       | (A/G)       |
| 24091       | CakSNP24091    | <i>Kabuli</i>    | Ca_Kabuli_denovo             | 22520823                       | (G/C)       |

| <b>S.N.</b> | <b>SNP IDs</b> | <b>Cultivars</b> | <b>Chromosomes/scaffolds</b> | <b>Physical positions (bp)</b> | <b>SNPs</b> |
|-------------|----------------|------------------|------------------------------|--------------------------------|-------------|
| 24092       | CakSNP24092    | <i>Kabuli</i>    | Ca_Kabuli_denovo             | 22520875                       | (T/C)       |
| 24093       | CakSNP24093    | <i>Kabuli</i>    | Ca_Kabuli_denovo             | 22521766                       | (G/C)       |
| 24094       | CakSNP24094    | <i>Kabuli</i>    | Ca_Kabuli_denovo             | 22521796                       | (C/T)       |
| 24095       | CakSNP24095    | <i>Kabuli</i>    | Ca_Kabuli_denovo             | 22529928                       | (A/G)       |
| 24096       | CakSNP24096    | <i>Kabuli</i>    | Ca_Kabuli_denovo             | 22531422                       | (A/C)       |
| 24097       | CakSNP24097    | <i>Kabuli</i>    | Ca_Kabuli_denovo             | 22531463                       | (A/G)       |
| 24098       | CakSNP24098    | <i>Kabuli</i>    | Ca_Kabuli_denovo             | 22534289                       | (A/G)       |
| 24099       | CakSNP24099    | <i>Kabuli</i>    | Ca_Kabuli_denovo             | 22542381                       | (T/G)       |
| 24100       | CakSNP24100    | <i>Kabuli</i>    | Ca_Kabuli_denovo             | 22542441                       | (G/A)       |
| 24101       | CakSNP24101    | <i>Kabuli</i>    | Ca_Kabuli_denovo             | 22546566                       | (A/C)       |
| 24102       | CakSNP24102    | <i>Kabuli</i>    | Ca_Kabuli_denovo             | 22556801                       | (T/C)       |
| 24103       | CakSNP24103    | <i>Kabuli</i>    | Ca_Kabuli_denovo             | 22561762                       | (G/C)       |
| 24104       | CakSNP24104    | <i>Kabuli</i>    | Ca_Kabuli_denovo             | 22561771                       | (T/G)       |
| 24105       | CakSNP24105    | <i>Kabuli</i>    | Ca_Kabuli_denovo             | 22567017                       | (T/C)       |
| 24106       | CakSNP24106    | <i>Kabuli</i>    | Ca_Kabuli_denovo             | 22567026                       | (G/A)       |
| 24107       | CakSNP24107    | <i>Kabuli</i>    | Ca_Kabuli_denovo             | 22567059                       | (T/C)       |
| 24108       | CakSNP24108    | <i>Kabuli</i>    | Ca_Kabuli_denovo             | 22567219                       | (T/C)       |
| 24109       | CakSNP24109    | <i>Kabuli</i>    | Ca_Kabuli_denovo             | 22567221                       | (C/T)       |
| 24110       | CakSNP24110    | <i>Kabuli</i>    | Ca_Kabuli_denovo             | 22568144                       | (C/G)       |
| 24111       | CakSNP24111    | <i>Kabuli</i>    | Ca_Kabuli_denovo             | 22568186                       | (C/A)       |
| 24112       | CakSNP24112    | <i>Kabuli</i>    | Ca_Kabuli_denovo             | 22568434                       | (C/G)       |
| 24113       | CakSNP24113    | <i>Kabuli</i>    | Ca_Kabuli_denovo             | 22578643                       | (C/T)       |
| 24114       | CakSNP24114    | <i>Kabuli</i>    | Ca_Kabuli_denovo             | 22579945                       | (G/C)       |
| 24115       | CakSNP24115    | <i>Kabuli</i>    | Ca_Kabuli_denovo             | 22581626                       | (T/C)       |
| 24116       | CakSNP24116    | <i>Kabuli</i>    | Ca_Kabuli_denovo             | 22586002                       | (C/T)       |
| 24117       | CakSNP24117    | <i>Kabuli</i>    | Ca_Kabuli_denovo             | 22590746                       | (G/A)       |
| 24118       | CakSNP24118    | <i>Kabuli</i>    | Ca_Kabuli_denovo             | 22590761                       | (T/C)       |
| 24119       | CakSNP24119    | <i>Kabuli</i>    | Ca_Kabuli_denovo             | 22602100                       | (C/T)       |
| 24120       | CakSNP24120    | <i>Kabuli</i>    | Ca_Kabuli_denovo             | 22614086                       | (C/T)       |
| 24121       | CakSNP24121    | <i>Kabuli</i>    | Ca_Kabuli_denovo             | 22614088                       | (C/G)       |
| 24122       | CakSNP24122    | <i>Kabuli</i>    | Ca_Kabuli_denovo             | 22615811                       | (G/T)       |
| 24123       | CakSNP24123    | <i>Kabuli</i>    | Ca_Kabuli_denovo             | 22635214                       | (G/C)       |
| 24124       | CakSNP24124    | <i>Kabuli</i>    | Ca_Kabuli_denovo             | 22635612                       | (T/C)       |
| 24125       | CakSNP24125    | <i>Kabuli</i>    | Ca_Kabuli_denovo             | 22635633                       | (G/A)       |
| 24126       | CakSNP24126    | <i>Kabuli</i>    | Ca_Kabuli_denovo             | 22639106                       | (A/G)       |
| 24127       | CakSNP24127    | <i>Kabuli</i>    | Ca_Kabuli_denovo             | 22639177                       | (T/C)       |
| 24128       | CakSNP24128    | <i>Kabuli</i>    | Ca_Kabuli_denovo             | 22642069                       | (G/C)       |
| 24129       | CakSNP24129    | <i>Kabuli</i>    | Ca_Kabuli_denovo             | 22643291                       | (C/G)       |

| <b>S.N.</b> | <b>SNP IDs</b> | <b>Cultivars</b> | <b>Chromosomes/scaffolds</b> | <b>Physical positions (bp)</b> | <b>SNPs</b> |
|-------------|----------------|------------------|------------------------------|--------------------------------|-------------|
| 24130       | CakSNP24130    | <i>Kabuli</i>    | Ca_Kabuli_denovo             | 22643294                       | (C/G)       |
| 24131       | CakSNP24131    | <i>Kabuli</i>    | Ca_Kabuli_denovo             | 22647446                       | (C/G)       |
| 24132       | CakSNP24132    | <i>Kabuli</i>    | Ca_Kabuli_denovo             | 22647449                       | (T/C)       |
| 24133       | CakSNP24133    | <i>Kabuli</i>    | Ca_Kabuli_denovo             | 22650472                       | (A/G)       |
| 24134       | CakSNP24134    | <i>Kabuli</i>    | Ca_Kabuli_denovo             | 22651126                       | (A/G)       |
| 24135       | CakSNP24135    | <i>Kabuli</i>    | Ca_Kabuli_denovo             | 22651157                       | (A/G)       |
| 24136       | CakSNP24136    | <i>Kabuli</i>    | Ca_Kabuli_denovo             | 22658903                       | (C/T)       |
| 24137       | CakSNP24137    | <i>Kabuli</i>    | Ca_Kabuli_denovo             | 22658906                       | (C/T)       |
| 24138       | CakSNP24138    | <i>Kabuli</i>    | Ca_Kabuli_denovo             | 22663217                       | (G/C)       |
| 24139       | CakSNP24139    | <i>Kabuli</i>    | Ca_Kabuli_denovo             | 22663232                       | (T/C)       |
| 24140       | CakSNP24140    | <i>Kabuli</i>    | Ca_Kabuli_denovo             | 22665794                       | (C/G)       |
| 24141       | CakSNP24141    | <i>Kabuli</i>    | Ca_Kabuli_denovo             | 22667929                       | (T/C)       |
| 24142       | CakSNP24142    | <i>Kabuli</i>    | Ca_Kabuli_denovo             | 22698389                       | (C/G)       |
| 24143       | CakSNP24143    | <i>Kabuli</i>    | Ca_Kabuli_denovo             | 22701613                       | (A/T)       |
| 24144       | CakSNP24144    | <i>Kabuli</i>    | Ca_Kabuli_denovo             | 22701626                       | (C/T)       |
| 24145       | CakSNP24145    | <i>Kabuli</i>    | Ca_Kabuli_denovo             | 22704938                       | (C/G)       |
| 24146       | CakSNP24146    | <i>Kabuli</i>    | Ca_Kabuli_denovo             | 22706294                       | (A/G)       |
| 24147       | CakSNP24147    | <i>Kabuli</i>    | Ca_Kabuli_denovo             | 22706309                       | (G/A)       |
| 24148       | CakSNP24148    | <i>Kabuli</i>    | Ca_Kabuli_denovo             | 22711654                       | (T/C)       |
| 24149       | CakSNP24149    | <i>Kabuli</i>    | Ca_Kabuli_denovo             | 22712338                       | (G/C)       |
| 24150       | CakSNP24150    | <i>Kabuli</i>    | Ca_Kabuli_denovo             | 22722943                       | (T/C)       |
| 24151       | CakSNP24151    | <i>Kabuli</i>    | Ca_Kabuli_denovo             | 22722952                       | (G/C)       |
| 24152       | CakSNP24152    | <i>Kabuli</i>    | Ca_Kabuli_denovo             | 22725798                       | (G/C)       |
| 24153       | CakSNP24153    | <i>Kabuli</i>    | Ca_Kabuli_denovo             | 22725833                       | (G/T)       |
| 24154       | CakSNP24154    | <i>Kabuli</i>    | Ca_Kabuli_denovo             | 22733117                       | (A/G)       |
| 24155       | CakSNP24155    | <i>Kabuli</i>    | Ca_Kabuli_denovo             | 22733125                       | (C/G)       |
| 24156       | CakSNP24156    | <i>Kabuli</i>    | Ca_Kabuli_denovo             | 22735553                       | (A/G)       |
| 24157       | CakSNP24157    | <i>Kabuli</i>    | Ca_Kabuli_denovo             | 22735578                       | (A/G)       |
| 24158       | CakSNP24158    | <i>Kabuli</i>    | Ca_Kabuli_denovo             | 22749173                       | (G/T)       |
| 24159       | CakSNP24159    | <i>Kabuli</i>    | Ca_Kabuli_denovo             | 22749177                       | (G/C)       |
| 24160       | CakSNP24160    | <i>Kabuli</i>    | Ca_Kabuli_denovo             | 22749186                       | (T/G)       |
| 24161       | CakSNP24161    | <i>Kabuli</i>    | Ca_Kabuli_denovo             | 22762717                       | (C/G)       |
| 24162       | CakSNP24162    | <i>Kabuli</i>    | Ca_Kabuli_denovo             | 22762805                       | (T/G)       |
| 24163       | CakSNP24163    | <i>Kabuli</i>    | Ca_Kabuli_denovo             | 22762824                       | (G/T)       |
| 24164       | CakSNP24164    | <i>Kabuli</i>    | Ca_Kabuli_denovo             | 22762857                       | (C/G)       |
| 24165       | CakSNP24165    | <i>Kabuli</i>    | Ca_Kabuli_denovo             | 22767279                       | (T/G)       |
| 24166       | CakSNP24166    | <i>Kabuli</i>    | Ca_Kabuli_denovo             | 22767322                       | (C/A)       |
| 24167       | CakSNP24167    | <i>Kabuli</i>    | Ca_Kabuli_denovo             | 22770414                       | (T/C)       |

| <b>S.N.</b> | <b>SNP IDs</b> | <b>Cultivars</b> | <b>Chromosomes/scaffolds</b> | <b>Physical positions (bp)</b> | <b>SNPs</b> |
|-------------|----------------|------------------|------------------------------|--------------------------------|-------------|
| 24168       | CakSNP24168    | <i>Kabuli</i>    | Ca_Kabuli_denovo             | 22770468                       | (A/G)       |
| 24169       | CakSNP24169    | <i>Kabuli</i>    | Ca_Kabuli_denovo             | 22772193                       | (G/C)       |
| 24170       | CakSNP24170    | <i>Kabuli</i>    | Ca_Kabuli_denovo             | 22772208                       | (T/G)       |
| 24171       | CakSNP24171    | <i>Kabuli</i>    | Ca_Kabuli_denovo             | 22774872                       | (A/G)       |
| 24172       | CakSNP24172    | <i>Kabuli</i>    | Ca_Kabuli_denovo             | 22774887                       | (C/A)       |
| 24173       | CakSNP24173    | <i>Kabuli</i>    | Ca_Kabuli_denovo             | 22774929                       | (T/G)       |
| 24174       | CakSNP24174    | <i>Kabuli</i>    | Ca_Kabuli_denovo             | 22774938                       | (C/G)       |
| 24175       | CakSNP24175    | <i>Kabuli</i>    | Ca_Kabuli_denovo             | 22779099                       | (G/T)       |
| 24176       | CakSNP24176    | <i>Kabuli</i>    | Ca_Kabuli_denovo             | 22786218                       | (T/G)       |
| 24177       | CakSNP24177    | <i>Kabuli</i>    | Ca_Kabuli_denovo             | 22786232                       | (A/G)       |
| 24178       | CakSNP24178    | <i>Kabuli</i>    | Ca_Kabuli_denovo             | 22786258                       | (G/A)       |
| 24179       | CakSNP24179    | <i>Kabuli</i>    | Ca_Kabuli_denovo             | 22786269                       | (A/G)       |
| 24180       | CakSNP24180    | <i>Kabuli</i>    | Ca_Kabuli_denovo             | 23389902                       | (A/G)       |
| 24181       | CakSNP24181    | <i>Kabuli</i>    | Ca_Kabuli_denovo             | 26279213                       | (G/C)       |
| 24182       | CakSNP24182    | <i>Kabuli</i>    | Ca_Kabuli_denovo             | 26279215                       | (G/T)       |
| 24183       | CakSNP24183    | <i>Kabuli</i>    | Ca_Kabuli_denovo             | 26279249                       | (T/C)       |
| 24184       | CakSNP24184    | <i>Kabuli</i>    | Ca_Kabuli_denovo             | 28463588                       | (A/G)       |
| 24185       | CakSNP24185    | <i>Kabuli</i>    | Ca_Kabuli_denovo             | 28463605                       | (G/A)       |
| 24186       | CakSNP24186    | <i>Kabuli</i>    | Ca_Kabuli_denovo             | 30521758                       | (C/T)       |
| 24187       | CakSNP24187    | <i>Kabuli</i>    | Ca_Kabuli_denovo             | 30521760                       | (T/C)       |
| 24188       | CakSNP24188    | <i>Kabuli</i>    | Ca_Kabuli_denovo             | 30521761                       | (G/A)       |
| 24189       | CakSNP24189    | <i>Kabuli</i>    | Ca_Kabuli_denovo             | 30521763                       | (T/C)       |
| 24190       | CakSNP24190    | <i>Kabuli</i>    | Ca_Kabuli_denovo             | 30542416                       | (G/A)       |
| 24191       | CakSNP24191    | <i>Kabuli</i>    | Ca_Kabuli_denovo             | 30542450                       | (A/G)       |
| 24192       | CakSNP24192    | <i>Kabuli</i>    | Ca_Kabuli_denovo             | 30542467                       | (C/G)       |
| 24193       | CakSNP24193    | <i>Kabuli</i>    | Ca_Kabuli_denovo             | 30542477                       | (A/G)       |
| 24194       | CakSNP24194    | <i>Kabuli</i>    | Ca_Kabuli_denovo             | 30544320                       | (T/G)       |
| 24195       | CakSNP24195    | <i>Kabuli</i>    | Ca_Kabuli_denovo             | 30544340                       | (T/C)       |
| 24196       | CakSNP24196    | <i>Kabuli</i>    | Ca_Kabuli_denovo             | 30544349                       | (A/G)       |
| 24197       | CakSNP24197    | <i>Kabuli</i>    | Ca_Kabuli_denovo             | 30544978                       | (T/A)       |
| 24198       | CakSNP24198    | <i>Kabuli</i>    | Ca_Kabuli_denovo             | 30544987                       | (T/A)       |
| 24199       | CakSNP24199    | <i>Kabuli</i>    | Ca_Kabuli_denovo             | 30544997                       | (G/C)       |
| 24200       | CakSNP24200    | <i>Kabuli</i>    | Ca_Kabuli_denovo             | 30556074                       | (T/C)       |
| 24201       | CakSNP24201    | <i>Kabuli</i>    | Ca_Kabuli_denovo             | 30556076                       | (T/C)       |
| 24202       | CakSNP24202    | <i>Kabuli</i>    | Ca_Kabuli_denovo             | 30556080                       | (T/A)       |
| 24203       | CakSNP24203    | <i>Kabuli</i>    | Ca_Kabuli_denovo             | 30556081                       | (C/A)       |
| 24204       | CakSNP24204    | <i>Kabuli</i>    | Ca_Kabuli_denovo             | 30562605                       | (A/G)       |
| 24205       | CakSNP24205    | <i>Kabuli</i>    | Ca_Kabuli_denovo             | 30562663                       | (G/A)       |

| <b>S.N.</b> | <b>SNP IDs</b> | <b>Cultivars</b> | <b>Chromosomes/scaffolds</b> | <b>Physical positions (bp)</b> | <b>SNPs</b> |
|-------------|----------------|------------------|------------------------------|--------------------------------|-------------|
| 24206       | CakSNP24206    | <i>Kabuli</i>    | Ca_Kabuli_denovo             | 30564215                       | (C/G)       |
| 24207       | CakSNP24207    | <i>Kabuli</i>    | Ca_Kabuli_denovo             | 30564217                       | (T/G)       |
| 24208       | CakSNP24208    | <i>Kabuli</i>    | Ca_Kabuli_denovo             | 30565114                       | (T/G)       |
| 24209       | CakSNP24209    | <i>Kabuli</i>    | Ca_Kabuli_denovo             | 30565484                       | (C/A)       |
| 24210       | CakSNP24210    | <i>Kabuli</i>    | Ca_Kabuli_denovo             | 30565552                       | (G/T)       |
| 24211       | CakSNP24211    | <i>Kabuli</i>    | Ca_Kabuli_denovo             | 30585112                       | (C/G)       |
| 24212       | CakSNP24212    | <i>Kabuli</i>    | Ca_Kabuli_denovo             | 30595715                       | (C/G)       |
| 24213       | CakSNP24213    | <i>Kabuli</i>    | Ca_Kabuli_denovo             | 30595726                       | (C/G)       |
| 24214       | CakSNP24214    | <i>Kabuli</i>    | Ca_Kabuli_denovo             | 30595772                       | (A/G)       |
| 24215       | CakSNP24215    | <i>Kabuli</i>    | Ca_Kabuli_denovo             | 30595815                       | (C/A)       |
| 24216       | CakSNP24216    | <i>Kabuli</i>    | Ca_Kabuli_denovo             | 30595832                       | (T/A)       |
| 24217       | CakSNP24217    | <i>Kabuli</i>    | Ca_Kabuli_denovo             | 30608911                       | (G/A)       |
| 24218       | CakSNP24218    | <i>Kabuli</i>    | Ca_Kabuli_denovo             | 30608992                       | (G/T)       |
| 24219       | CakSNP24219    | <i>Kabuli</i>    | Ca_Kabuli_denovo             | 30608994                       | (T/C)       |
| 24220       | CakSNP24220    | <i>Kabuli</i>    | Ca_Kabuli_denovo             | 30624438                       | (A/T)       |
| 24221       | CakSNP24221    | <i>Kabuli</i>    | Ca_Kabuli_denovo             | 30624449                       | (G/A)       |
| 24222       | CakSNP24222    | <i>Kabuli</i>    | Ca_Kabuli_denovo             | 30654546                       | (A/G)       |
| 24223       | CakSNP24223    | <i>Kabuli</i>    | Ca_Kabuli_denovo             | 30654549                       | (A/C)       |
| 24224       | CakSNP24224    | <i>Kabuli</i>    | Ca_Kabuli_denovo             | 30654551                       | (C/G)       |
| 24225       | CakSNP24225    | <i>Kabuli</i>    | Ca_Kabuli_denovo             | 30654552                       | (T/G)       |
| 24226       | CakSNP24226    | <i>Kabuli</i>    | Ca_Kabuli_denovo             | 30689389                       | (C/T)       |
| 24227       | CakSNP24227    | <i>Kabuli</i>    | Ca_Kabuli_denovo             | 30692542                       | (C/T)       |
| 24228       | CakSNP24228    | <i>Kabuli</i>    | Ca_Kabuli_denovo             | 30701261                       | (G/A)       |
| 24229       | CakSNP24229    | <i>Kabuli</i>    | Ca_Kabuli_denovo             | 30701345                       | (T/A)       |
| 24230       | CakSNP24230    | <i>Kabuli</i>    | Ca_Kabuli_denovo             | 30713916                       | (A/G)       |
| 24231       | CakSNP24231    | <i>Kabuli</i>    | Ca_Kabuli_denovo             | 30713943                       | (A/G)       |
| 24232       | CakSNP24232    | <i>Kabuli</i>    | Ca_Kabuli_denovo             | 30717672                       | (T/G)       |
| 24233       | CakSNP24233    | <i>Kabuli</i>    | Ca_Kabuli_denovo             | 30720426                       | (T/G)       |
| 24234       | CakSNP24234    | <i>Kabuli</i>    | Ca_Kabuli_denovo             | 30720438                       | (G/T)       |
| 24235       | CakSNP24235    | <i>Kabuli</i>    | Ca_Kabuli_denovo             | 30720473                       | (A/G)       |
| 24236       | CakSNP24236    | <i>Kabuli</i>    | Ca_Kabuli_denovo             | 30722929                       | (G/T)       |
| 24237       | CakSNP24237    | <i>Kabuli</i>    | Ca_Kabuli_denovo             | 30722957                       | (T/G)       |
| 24238       | CakSNP24238    | <i>Kabuli</i>    | Ca_Kabuli_denovo             | 30722963                       | (A/G)       |
| 24239       | CakSNP24239    | <i>Kabuli</i>    | Ca_Kabuli_denovo             | 30722980                       | (G/A)       |
| 24240       | CakSNP24240    | <i>Kabuli</i>    | Ca_Kabuli_denovo             | 30726959                       | (G/A)       |
| 24241       | CakSNP24241    | <i>Kabuli</i>    | Ca_Kabuli_denovo             | 30726961                       | (G/A)       |
| 24242       | CakSNP24242    | <i>Kabuli</i>    | Ca_Kabuli_denovo             | 30726962                       | (A/G)       |
| 24243       | CakSNP24243    | <i>Kabuli</i>    | Ca_Kabuli_denovo             | 30726963                       | (G/A)       |



| <b>S.N.</b> | <b>SNP IDs</b> | <b>Cultivars</b> | <b>Chromosomes/scaffolds</b> | <b>Physical positions (bp)</b> | <b>SNPs</b> |
|-------------|----------------|------------------|------------------------------|--------------------------------|-------------|
| 24244       | CakSNP24244    | <i>Kabuli</i>    | Ca_Kabuli_denovo             | 30728437                       | (T/G)       |
| 24245       | CakSNP24245    | <i>Kabuli</i>    | Ca_Kabuli_denovo             | 30728439                       | (A/G)       |
| 24246       | CakSNP24246    | <i>Kabuli</i>    | Ca_Kabuli_denovo             | 30728469                       | (A/G)       |
| 24247       | CakSNP24247    | <i>Kabuli</i>    | Ca_Kabuli_denovo             | 30730294                       | (G/C)       |
| 24248       | CakSNP24248    | <i>Kabuli</i>    | Ca_Kabuli_denovo             | 30730741                       | (C/A)       |
| 24249       | CakSNP24249    | <i>Kabuli</i>    | Ca_Kabuli_denovo             | 30730742                       | (C/G)       |
| 24250       | CakSNP24250    | <i>Kabuli</i>    | Ca_Kabuli_denovo             | 30730743                       | (A/C)       |
| 24251       | CakSNP24251    | <i>Kabuli</i>    | Ca_Kabuli_denovo             | 30730744                       | (G/A)       |
| 24252       | CakSNP24252    | <i>Kabuli</i>    | Ca_Kabuli_denovo             | 30730790                       | (A/C)       |
| 24253       | CakSNP24253    | <i>Kabuli</i>    | Ca_Kabuli_denovo             | 30731368                       | (C/G)       |
| 24254       | CakSNP24254    | <i>Kabuli</i>    | Ca_Kabuli_denovo             | 30731905                       | (T/G)       |
| 24255       | CakSNP24255    | <i>Kabuli</i>    | Ca_Kabuli_denovo             | 30731938                       | (T/G)       |
| 24256       | CakSNP24256    | <i>Kabuli</i>    | Ca_Kabuli_denovo             | 30733630                       | (T/G)       |
| 24257       | CakSNP24257    | <i>Kabuli</i>    | Ca_Kabuli_denovo             | 30733690                       | (C/G)       |
| 24258       | CakSNP24258    | <i>Kabuli</i>    | Ca_Kabuli_denovo             | 30733694                       | (A/T)       |
| 24259       | CakSNP24259    | <i>Kabuli</i>    | Ca_Kabuli_denovo             | 30733703                       | (G/T)       |
| 24260       | CakSNP24260    | <i>Kabuli</i>    | Ca_Kabuli_denovo             | 30742989                       | (T/G)       |
| 24261       | CakSNP24261    | <i>Kabuli</i>    | Ca_Kabuli_denovo             | 30742991                       | (A/C)       |
| 24262       | CakSNP24262    | <i>Kabuli</i>    | Ca_Kabuli_denovo             | 30742993                       | (A/C)       |
| 24263       | CakSNP24263    | <i>Kabuli</i>    | Ca_Kabuli_denovo             | 30742994                       | (G/A)       |
| 24264       | CakSNP24264    | <i>Kabuli</i>    | Ca_Kabuli_denovo             | 30742995                       | (A/G)       |
| 24265       | CakSNP24265    | <i>Kabuli</i>    | Ca_Kabuli_denovo             | 30746022                       | (G/A)       |
| 24266       | CakSNP24266    | <i>Kabuli</i>    | Ca_Kabuli_denovo             | 30746046                       | (A/G)       |
| 24267       | CakSNP24267    | <i>Kabuli</i>    | Ca_Kabuli_denovo             | 30752607                       | (A/G)       |
| 24268       | CakSNP24268    | <i>Kabuli</i>    | Ca_Kabuli_denovo             | 30756090                       | (A/G)       |
| 24269       | CakSNP24269    | <i>Kabuli</i>    | Ca_Kabuli_denovo             | 30756108                       | (A/C)       |
| 24270       | CakSNP24270    | <i>Kabuli</i>    | Ca_Kabuli_denovo             | 30756117                       | (A/G)       |
| 24271       | CakSNP24271    | <i>Kabuli</i>    | Ca_Kabuli_denovo             | 30760173                       | (G/C)       |
| 24272       | CakSNP24272    | <i>Kabuli</i>    | Ca_Kabuli_denovo             | 30760215                       | (C/G)       |
| 24273       | CakSNP24273    | <i>Kabuli</i>    | Ca_Kabuli_denovo             | 30765681                       | (T/C)       |
| 24274       | CakSNP24274    | <i>Kabuli</i>    | Ca_Kabuli_denovo             | 30765682                       | (C/G)       |
| 24275       | CakSNP24275    | <i>Kabuli</i>    | Ca_Kabuli_denovo             | 30765685                       | (A/C)       |
| 24276       | CakSNP24276    | <i>Kabuli</i>    | Ca_Kabuli_denovo             | 30765686                       | (A/C)       |
| 24277       | CakSNP24277    | <i>Kabuli</i>    | Ca_Kabuli_denovo             | 30766057                       | (G/A)       |
| 24278       | CakSNP24278    | <i>Kabuli</i>    | Ca_Kabuli_denovo             | 30768470                       | (A/T)       |
| 24279       | CakSNP24279    | <i>Kabuli</i>    | Ca_Kabuli_denovo             | 30772256                       | (C/G)       |
| 24280       | CakSNP24280    | <i>Kabuli</i>    | Ca_Kabuli_denovo             | 30772258                       | (G/T)       |
| 24281       | CakSNP24281    | <i>Kabuli</i>    | Ca_Kabuli_denovo             | 30772260                       | (C/T)       |

| <b>S.N.</b> | <b>SNP IDs</b> | <b>Cultivars</b> | <b>Chromosomes/scaffolds</b> | <b>Physical positions (bp)</b> | <b>SNPs</b> |
|-------------|----------------|------------------|------------------------------|--------------------------------|-------------|
| 24282       | CakSNP24282    | <i>Kabuli</i>    | Ca_Kabuli_denovo             | 30772261                       | (A/C)       |
| 24283       | CakSNP24283    | <i>Kabuli</i>    | Ca_Kabuli_denovo             | 30772262                       | (G/A)       |
| 24284       | CakSNP24284    | <i>Kabuli</i>    | Ca_Kabuli_denovo             | 30774518                       | (A/G)       |
| 24285       | CakSNP24285    | <i>Kabuli</i>    | Ca_Kabuli_denovo             | 30774519                       | (G/A)       |
| 24286       | CakSNP24286    | <i>Kabuli</i>    | Ca_Kabuli_denovo             | 30774521                       | (A/C)       |
| 24287       | CakSNP24287    | <i>Kabuli</i>    | Ca_Kabuli_denovo             | 30774523                       | (G/A)       |
| 24288       | CakSNP24288    | <i>Kabuli</i>    | Ca_Kabuli_denovo             | 30774524                       | (T/A)       |
| 24289       | CakSNP24289    | <i>Kabuli</i>    | Ca_Kabuli_denovo             | 30774525                       | (C/A)       |
| 24290       | CakSNP24290    | <i>Kabuli</i>    | Ca_Kabuli_denovo             | 30775207                       | (A/G)       |
| 24291       | CakSNP24291    | <i>Kabuli</i>    | Ca_Kabuli_denovo             | 30775239                       | (A/G)       |
| 24292       | CakSNP24292    | <i>Kabuli</i>    | Ca_Kabuli_denovo             | 30775240                       | (T/G)       |
| 24293       | CakSNP24293    | <i>Kabuli</i>    | Ca_Kabuli_denovo             | 30775682                       | (C/G)       |
| 24294       | CakSNP24294    | <i>Kabuli</i>    | Ca_Kabuli_denovo             | 30775707                       | (C/G)       |
| 24295       | CakSNP24295    | <i>Kabuli</i>    | Ca_Kabuli_denovo             | 30775728                       | (A/G)       |
| 24296       | CakSNP24296    | <i>Kabuli</i>    | Ca_Kabuli_denovo             | 30776185                       | (C/G)       |
| 24297       | CakSNP24297    | <i>Kabuli</i>    | Ca_Kabuli_denovo             | 30776186                       | (A/G)       |
| 24298       | CakSNP24298    | <i>Kabuli</i>    | Ca_Kabuli_denovo             | 30776187                       | (A/T)       |
| 24299       | CakSNP24299    | <i>Kabuli</i>    | Ca_Kabuli_denovo             | 30776188                       | (C/T)       |
| 24300       | CakSNP24300    | <i>Kabuli</i>    | Ca_Kabuli_denovo             | 30780155                       | (C/A)       |
| 24301       | CakSNP24301    | <i>Kabuli</i>    | Ca_Kabuli_denovo             | 30780159                       | (A/G)       |
| 24302       | CakSNP24302    | <i>Kabuli</i>    | Ca_Kabuli_denovo             | 30780168                       | (T/G)       |
| 24303       | CakSNP24303    | <i>Kabuli</i>    | Ca_Kabuli_denovo             | 30780869                       | (T/G)       |
| 24304       | CakSNP24304    | <i>Kabuli</i>    | Ca_Kabuli_denovo             | 30780871                       | (C/G)       |
| 24305       | CakSNP24305    | <i>Kabuli</i>    | Ca_Kabuli_denovo             | 30780877                       | (A/G)       |
| 24306       | CakSNP24306    | <i>Kabuli</i>    | Ca_Kabuli_denovo             | 30780881                       | (C/G)       |
| 24307       | CakSNP24307    | <i>Kabuli</i>    | Ca_Kabuli_denovo             | 30780893                       | (T/G)       |
| 24308       | CakSNP24308    | <i>Kabuli</i>    | Ca_Kabuli_denovo             | 30786169                       | (A/G)       |
| 24309       | CakSNP24309    | <i>Kabuli</i>    | Ca_Kabuli_denovo             | 30786176                       | (G/A)       |
| 24310       | CakSNP24310    | <i>Kabuli</i>    | Ca_Kabuli_denovo             | 30786230                       | (T/G)       |
| 24311       | CakSNP24311    | <i>Kabuli</i>    | Ca_Kabuli_denovo             | 30786234                       | (A/G)       |
| 24312       | CakSNP24312    | <i>Kabuli</i>    | Ca_Kabuli_denovo             | 30792759                       | (T/C)       |
| 24313       | CakSNP24313    | <i>Kabuli</i>    | Ca_Kabuli_denovo             | 30792760                       | (A/C)       |
| 24314       | CakSNP24314    | <i>Kabuli</i>    | Ca_Kabuli_denovo             | 30792764                       | (A/C)       |
| 24315       | CakSNP24315    | <i>Kabuli</i>    | Ca_Kabuli_denovo             | 30792765                       | (A/G)       |
| 24316       | CakSNP24316    | <i>Kabuli</i>    | Ca_Kabuli_denovo             | 30797378                       | (T/G)       |
| 24317       | CakSNP24317    | <i>Kabuli</i>    | Ca_Kabuli_denovo             | 30797410                       | (A/G)       |
| 24318       | CakSNP24318    | <i>Kabuli</i>    | Ca_Kabuli_denovo             | 30798168                       | (C/G)       |
| 24319       | CakSNP24319    | <i>Kabuli</i>    | Ca_Kabuli_denovo             | 30798174                       | (A/G)       |

| <b>S.N.</b> | <b>SNP IDs</b> | <b>Cultivars</b> | <b>Chromosomes/scaffolds</b> | <b>Physical positions (bp)</b> | <b>SNPs</b> |
|-------------|----------------|------------------|------------------------------|--------------------------------|-------------|
| 24320       | CakSNP24320    | <i>Kabuli</i>    | Ca_Kabuli_denovo             | 30798186                       | (G/A)       |
| 24321       | CakSNP24321    | <i>Kabuli</i>    | Ca_Kabuli_denovo             | 30798221                       | (A/G)       |
| 24322       | CakSNP24322    | <i>Kabuli</i>    | Ca_Kabuli_denovo             | 30806118                       | (A/G)       |
| 24323       | CakSNP24323    | <i>Kabuli</i>    | Ca_Kabuli_denovo             | 30807009                       | (C/G)       |
| 24324       | CakSNP24324    | <i>Kabuli</i>    | Ca_Kabuli_denovo             | 30814984                       | (C/A)       |
| 24325       | CakSNP24325    | <i>Kabuli</i>    | Ca_Kabuli_denovo             | 30814986                       | (G/T)       |
| 24326       | CakSNP24326    | <i>Kabuli</i>    | Ca_Kabuli_denovo             | 30814988                       | (C/A)       |
| 24327       | CakSNP24327    | <i>Kabuli</i>    | Ca_Kabuli_denovo             | 30814989                       | (C/A)       |
| 24328       | CakSNP24328    | <i>Kabuli</i>    | Ca_Kabuli_denovo             | 30814991                       | (A/G)       |
| 24329       | CakSNP24329    | <i>Kabuli</i>    | Ca_Kabuli_denovo             | 30817556                       | (C/G)       |
| 24330       | CakSNP24330    | <i>Kabuli</i>    | Ca_Kabuli_denovo             | 30820587                       | (G/A)       |
| 24331       | CakSNP24331    | <i>Kabuli</i>    | Ca_Kabuli_denovo             | 30820674                       | (A/G)       |
| 24332       | CakSNP24332    | <i>Kabuli</i>    | Ca_Kabuli_denovo             | 30820693                       | (T/G)       |
| 24333       | CakSNP24333    | <i>Kabuli</i>    | Ca_Kabuli_denovo             | 30820725                       | (A/G)       |
| 24334       | CakSNP24334    | <i>Kabuli</i>    | Ca_Kabuli_denovo             | 30820857                       | (G/A)       |
| 24335       | CakSNP24335    | <i>Kabuli</i>    | Ca_Kabuli_denovo             | 30820885                       | (T/G)       |
| 24336       | CakSNP24336    | <i>Kabuli</i>    | Ca_Kabuli_denovo             | 30820935                       | (G/C)       |
| 24337       | CakSNP24337    | <i>Kabuli</i>    | Ca_Kabuli_denovo             | 30821907                       | (A/G)       |
| 24338       | CakSNP24338    | <i>Kabuli</i>    | Ca_Kabuli_denovo             | 30821961                       | (T/G)       |
| 24339       | CakSNP24339    | <i>Kabuli</i>    | Ca_Kabuli_denovo             | 30824952                       | (C/A)       |
| 24340       | CakSNP24340    | <i>Kabuli</i>    | Ca_Kabuli_denovo             | 30825037                       | (G/T)       |
| 24341       | CakSNP24341    | <i>Kabuli</i>    | Ca_Kabuli_denovo             | 30825073                       | (C/G)       |
| 24342       | CakSNP24342    | <i>Kabuli</i>    | Ca_Kabuli_denovo             | 30825087                       | (T/G)       |
| 24343       | CakSNP24343    | <i>Kabuli</i>    | Ca_Kabuli_denovo             | 30825459                       | (C/G)       |
| 24344       | CakSNP24344    | <i>Kabuli</i>    | Ca_Kabuli_denovo             | 30826626                       | (A/G)       |
| 24345       | CakSNP24345    | <i>Kabuli</i>    | Ca_Kabuli_denovo             | 30826708                       | (T/A)       |
| 24346       | CakSNP24346    | <i>Kabuli</i>    | Ca_Kabuli_denovo             | 30826821                       | (C/A)       |
| 24347       | CakSNP24347    | <i>Kabuli</i>    | Ca_Kabuli_denovo             | 30826826                       | (T/G)       |
| 24348       | CakSNP24348    | <i>Kabuli</i>    | Ca_Kabuli_denovo             | 30826840                       | (G/T)       |
| 24349       | CakSNP24349    | <i>Kabuli</i>    | Ca_Kabuli_denovo             | 30826859                       | (A/G)       |
| 24350       | CakSNP24350    | <i>Kabuli</i>    | Ca_Kabuli_denovo             | 30826896                       | (T/G)       |
| 24351       | CakSNP24351    | <i>Kabuli</i>    | Ca_Kabuli_denovo             | 30829200                       | (G/A)       |
| 24352       | CakSNP24352    | <i>Kabuli</i>    | Ca_Kabuli_denovo             | 30829213                       | (C/G)       |
| 24353       | CakSNP24353    | <i>Kabuli</i>    | Ca_Kabuli_denovo             | 30831665                       | (G/T)       |
| 24354       | CakSNP24354    | <i>Kabuli</i>    | Ca_Kabuli_denovo             | 30832766                       | (C/G)       |
| 24355       | CakSNP24355    | <i>Kabuli</i>    | Ca_Kabuli_denovo             | 30833069                       | (G/A)       |
| 24356       | CakSNP24356    | <i>Kabuli</i>    | Ca_Kabuli_denovo             | 30835039                       | (G/A)       |
| 24357       | CakSNP24357    | <i>Kabuli</i>    | Ca_Kabuli_denovo             | 30835060                       | (G/C)       |

| <b>S.N.</b> | <b>SNP IDs</b> | <b>Cultivars</b> | <b>Chromosomes/scaffolds</b> | <b>Physical positions (bp)</b> | <b>SNPs</b> |
|-------------|----------------|------------------|------------------------------|--------------------------------|-------------|
| 24358       | CakSNP24358    | <i>Kabuli</i>    | Ca_Kabuli_denovo             | 30836884                       | (A/G)       |
| 24359       | CakSNP24359    | <i>Kabuli</i>    | Ca_Kabuli_denovo             | 30836903                       | (T/C)       |
| 24360       | CakSNP24360    | <i>Kabuli</i>    | Ca_Kabuli_denovo             | 30836937                       | (T/A)       |
| 24361       | CakSNP24361    | <i>Kabuli</i>    | Ca_Kabuli_denovo             | 30836941                       | (A/C)       |
| 24362       | CakSNP24362    | <i>Kabuli</i>    | Ca_Kabuli_denovo             | 30846063                       | (T/G)       |
| 24363       | CakSNP24363    | <i>Kabuli</i>    | Ca_Kabuli_denovo             | 30846909                       | (T/G)       |
| 24364       | CakSNP24364    | <i>Kabuli</i>    | Ca_Kabuli_denovo             | 30886176                       | (A/G)       |
| 24365       | CakSNP24365    | <i>Kabuli</i>    | Ca_Kabuli_denovo             | 30886221                       | (C/T)       |
| 24366       | CakSNP24366    | <i>Kabuli</i>    | Ca_Kabuli_denovo             | 30914188                       | (A/T)       |
| 24367       | CakSNP24367    | <i>Kabuli</i>    | Ca_Kabuli_denovo             | 30914189                       | (T/C)       |
| 24368       | CakSNP24368    | <i>Kabuli</i>    | Ca_Kabuli_denovo             | 30914190                       | (C/G)       |
| 24369       | CakSNP24369    | <i>Kabuli</i>    | Ca_Kabuli_denovo             | 30914192                       | (A/G)       |
| 24370       | CakSNP24370    | <i>Kabuli</i>    | Ca_Kabuli_denovo             | 30914194                       | (G/A)       |
| 24371       | CakSNP24371    | <i>Kabuli</i>    | Ca_Kabuli_denovo             | 30914211                       | (T/A)       |
| 24372       | CakSNP24372    | <i>Kabuli</i>    | Ca_Kabuli_denovo             | 30914217                       | (G/A)       |
| 24373       | CakSNP24373    | <i>Kabuli</i>    | Ca_Kabuli_denovo             | 30914223                       | (T/C)       |
| 24374       | CakSNP24374    | <i>Kabuli</i>    | Ca_Kabuli_denovo             | 30914224                       | (C/T)       |
| 24375       | CakSNP24375    | <i>Kabuli</i>    | Ca_Kabuli_denovo             | 30915856                       | (G/A)       |
| 24376       | CakSNP24376    | <i>Kabuli</i>    | Ca_Kabuli_denovo             | 30920569                       | (C/A)       |
| 24377       | CakSNP24377    | <i>Kabuli</i>    | Ca_Kabuli_denovo             | 30920603                       | (A/G)       |
| 24378       | CakSNP24378    | <i>Kabuli</i>    | Ca_Kabuli_denovo             | 30920620                       | (C/G)       |
| 24379       | CakSNP24379    | <i>Kabuli</i>    | Ca_Kabuli_denovo             | 30920641                       | (T/G)       |
| 24380       | CakSNP24380    | <i>Kabuli</i>    | Ca_Kabuli_denovo             | 30948570                       | (A/G)       |
| 24381       | CakSNP24381    | <i>Kabuli</i>    | Ca_Kabuli_denovo             | 30948583                       | (C/T)       |
| 24382       | CakSNP24382    | <i>Kabuli</i>    | Ca_Kabuli_denovo             | 39369006                       | (C/G)       |
| 24383       | CakSNP24383    | <i>Kabuli</i>    | Ca_Kabuli_denovo             | 43194868                       | (T/A)       |
| 24384       | CakSNP24384    | <i>Kabuli</i>    | Ca_Kabuli_denovo             | 43209602                       | (C/T)       |
| 24385       | CakSNP24385    | <i>Kabuli</i>    | Ca_Kabuli_denovo             | 43209612                       | (T/G)       |
| 24386       | CakSNP24386    | <i>Kabuli</i>    | Ca_Kabuli_denovo             | 43706574                       | (C/T)       |
| 24387       | CakSNP24387    | <i>Kabuli</i>    | Ca_Kabuli_denovo             | 43711784                       | (A/C)       |
| 24388       | CakSNP24388    | <i>Kabuli</i>    | Ca_Kabuli_denovo             | 43711813                       | (A/G)       |
| 24389       | CakSNP24389    | <i>Kabuli</i>    | Ca_Kabuli_denovo             | 43990689                       | (T/C)       |
| 24390       | CakSNP24390    | <i>Kabuli</i>    | Ca_Kabuli_denovo             | 43990690                       | (C/G)       |
| 24391       | CakSNP24391    | <i>Kabuli</i>    | Ca_Kabuli_denovo             | 43990720                       | (C/A)       |
| 24392       | CakSNP24392    | <i>Kabuli</i>    | Ca_Kabuli_denovo             | 43990743                       | (G/A)       |
| 24393       | CakSNP24393    | <i>Kabuli</i>    | Ca_Kabuli_denovo             | 43990748                       | (T/G)       |
| 24394       | CakSNP24394    | <i>Kabuli</i>    | Ca_Kabuli_denovo             | 43990751                       | (C/T)       |
| 24395       | CakSNP24395    | <i>Kabuli</i>    | Ca_Kabuli_denovo             | 44029557                       | (G/C)       |

| <b>S.N.</b> | <b>SNP IDs</b> | <b>Cultivars</b> | <b>Chromosomes/scaffolds</b> | <b>Physical positions (bp)</b> | <b>SNPs</b> |
|-------------|----------------|------------------|------------------------------|--------------------------------|-------------|
| 24396       | CakSNP24396    | <i>Kabuli</i>    | Ca_Kabuli_denovo             | 44029593                       | (G/T)       |
| 24397       | CakSNP24397    | <i>Kabuli</i>    | Ca_Kabuli_denovo             | 44071541                       | (A/G)       |
| 24398       | CakSNP24398    | <i>Kabuli</i>    | Ca_Kabuli_denovo             | 44449557                       | (A/G)       |
| 24399       | CakSNP24399    | <i>Kabuli</i>    | Ca_Kabuli_denovo             | 44449575                       | (A/T)       |
| 24400       | CakSNP24400    | <i>Kabuli</i>    | Ca_Kabuli_denovo             | 44449577                       | (G/A)       |
| 24401       | CakSNP24401    | <i>Kabuli</i>    | Ca_Kabuli_denovo             | 44449597                       | (C/T)       |
| 24402       | CakSNP24402    | <i>Kabuli</i>    | Ca_Kabuli_denovo             | 67025915                       | (G/T)       |
| 24403       | CakSNP24403    | <i>Kabuli</i>    | Ca_Kabuli_denovo             | 67025928                       | (G/T)       |
| 24404       | CakSNP24404    | <i>Kabuli</i>    | Ca_Kabuli_denovo             | 67030173                       | (T/G)       |
| 24405       | CakSNP24405    | <i>Kabuli</i>    | Ca_Kabuli_denovo             | 67030216                       | (A/G)       |
| 24406       | CadSNP1        | <i>Desi</i>      | Ca_Desi_Chr01                | 179189                         | (A/C)       |
| 24407       | CadSNP2        | <i>Desi</i>      | Ca_Desi_Chr01                | 382862                         | (T/C)       |
| 24408       | CadSNP3        | <i>Desi</i>      | Ca_Desi_Chr01                | 382872                         | (G/A)       |
| 24409       | CadSNP4        | <i>Desi</i>      | Ca_Desi_Chr01                | 382898                         | (T/C)       |
| 24410       | CadSNP5        | <i>Desi</i>      | Ca_Desi_Chr01                | 436895                         | (A/C)       |
| 24411       | CadSNP6        | <i>Desi</i>      | Ca_Desi_Chr01                | 461870                         | (A/G)       |
| 24412       | CadSNP7        | <i>Desi</i>      | Ca_Desi_Chr01                | 498862                         | (A/G)       |
| 24413       | CadSNP8        | <i>Desi</i>      | Ca_Desi_Chr01                | 517512                         | (T/C)       |
| 24414       | CadSNP9        | <i>Desi</i>      | Ca_Desi_Chr01                | 517439                         | (A/G)       |
| 24415       | CadSNP10       | <i>Desi</i>      | Ca_Desi_Chr01                | 527099                         | (A/G)       |
| 24416       | CadSNP11       | <i>Desi</i>      | Ca_Desi_Chr01                | 527113                         | (G/T)       |
| 24417       | CadSNP12       | <i>Desi</i>      | Ca_Desi_Chr01                | 527118                         | (T/C)       |
| 24418       | CadSNP13       | <i>Desi</i>      | Ca_Desi_Chr01                | 527135                         | (G/A)       |
| 24419       | CadSNP14       | <i>Desi</i>      | Ca_Desi_Chr01                | 527142                         | (G/T)       |
| 24420       | CadSNP15       | <i>Desi</i>      | Ca_Desi_Chr01                | 527181                         | (C/A)       |
| 24421       | CadSNP16       | <i>Desi</i>      | Ca_Desi_Chr01                | 527176                         | (T/C)       |
| 24422       | CadSNP17       | <i>Desi</i>      | Ca_Desi_Chr01                | 527104                         | (G/T)       |
| 24423       | CadSNP18       | <i>Desi</i>      | Ca_Desi_Chr01                | 533122                         | (G/A)       |
| 24424       | CadSNP19       | <i>Desi</i>      | Ca_Desi_Chr01                | 533125                         | (C/T)       |
| 24425       | CadSNP20       | <i>Desi</i>      | Ca_Desi_Chr01                | 533127                         | (T/A)       |
| 24426       | CadSNP21       | <i>Desi</i>      | Ca_Desi_Chr01                | 533182                         | (T/A)       |
| 24427       | CadSNP22       | <i>Desi</i>      | Ca_Desi_Chr01                | 537937                         | (T/C)       |
| 24428       | CadSNP23       | <i>Desi</i>      | Ca_Desi_Chr01                | 537971                         | (A/G)       |
| 24429       | CadSNP24       | <i>Desi</i>      | Ca_Desi_Chr01                | 538012                         | (C/T)       |
| 24430       | CadSNP25       | <i>Desi</i>      | Ca_Desi_Chr01                | 538086                         | (G/T)       |
| 24431       | CadSNP26       | <i>Desi</i>      | Ca_Desi_Chr01                | 548203                         | (T/C)       |
| 24432       | CadSNP27       | <i>Desi</i>      | Ca_Desi_Chr01                | 551496                         | (T/G)       |
| 24433       | CadSNP28       | <i>Desi</i>      | Ca_Desi_Chr01                | 559934                         | (C/T)       |

| <b>S.N.</b> | <b>SNP IDs</b> | <b>Cultivars</b> | <b>Chromosomes/scaffolds</b> | <b>Physical positions (bp)</b> | <b>SNPs</b> |
|-------------|----------------|------------------|------------------------------|--------------------------------|-------------|
| 24434       | CadSNP29       | <i>Desi</i>      | Ca_Desig_Chr01               | 559964                         | (C/T)       |
| 24435       | CadSNP30       | <i>Desi</i>      | Ca_Desig_Chr01               | 620260                         | (T/G)       |
| 24436       | CadSNP31       | <i>Desi</i>      | Ca_Desig_Chr01               | 620310                         | (C/T)       |
| 24437       | CadSNP32       | <i>Desi</i>      | Ca_Desig_Chr01               | 647919                         | (G/T)       |
| 24438       | CadSNP33       | <i>Desi</i>      | Ca_Desig_Chr01               | 648015                         | (G/A)       |
| 24439       | CadSNP34       | <i>Desi</i>      | Ca_Desig_Chr01               | 664787                         | (T/G)       |
| 24440       | CadSNP35       | <i>Desi</i>      | Ca_Desig_Chr01               | 685373                         | (T/C)       |
| 24441       | CadSNP36       | <i>Desi</i>      | Ca_Desig_Chr01               | 704852                         | (A/G)       |
| 24442       | CadSNP37       | <i>Desi</i>      | Ca_Desig_Chr01               | 704814                         | (C/T)       |
| 24443       | CadSNP38       | <i>Desi</i>      | Ca_Desig_Chr01               | 704812                         | (C/G)       |
| 24444       | CadSNP39       | <i>Desi</i>      | Ca_Desig_Chr01               | 739330                         | (C/T)       |
| 24445       | CadSNP40       | <i>Desi</i>      | Ca_Desig_Chr01               | 739365                         | (G/A)       |
| 24446       | CadSNP41       | <i>Desi</i>      | Ca_Desig_Chr01               | 739371                         | (T/A)       |
| 24447       | CadSNP42       | <i>Desi</i>      | Ca_Desig_Chr01               | 739452                         | (T/C)       |
| 24448       | CadSNP43       | <i>Desi</i>      | Ca_Desig_Chr01               | 739437                         | (G/A)       |
| 24449       | CadSNP44       | <i>Desi</i>      | Ca_Desig_Chr01               | 756894                         | (A/G)       |
| 24450       | CadSNP45       | <i>Desi</i>      | Ca_Desig_Chr01               | 757353                         | (A/C)       |
| 24451       | CadSNP46       | <i>Desi</i>      | Ca_Desig_Chr01               | 757501                         | (T/A)       |
| 24452       | CadSNP47       | <i>Desi</i>      | Ca_Desig_Chr01               | 766231                         | (C/A)       |
| 24453       | CadSNP48       | <i>Desi</i>      | Ca_Desig_Chr01               | 766221                         | (T/C)       |
| 24454       | CadSNP49       | <i>Desi</i>      | Ca_Desig_Chr01               | 766202                         | (T/C)       |
| 24455       | CadSNP50       | <i>Desi</i>      | Ca_Desig_Chr01               | 766200                         | (A/G)       |
| 24456       | CadSNP51       | <i>Desi</i>      | Ca_Desig_Chr01               | 766199                         | (A/T)       |
| 24457       | CadSNP52       | <i>Desi</i>      | Ca_Desig_Chr01               | 785375                         | (C/A)       |
| 24458       | CadSNP53       | <i>Desi</i>      | Ca_Desig_Chr01               | 785650                         | (G/A)       |
| 24459       | CadSNP54       | <i>Desi</i>      | Ca_Desig_Chr01               | 786321                         | (A/T)       |
| 24460       | CadSNP55       | <i>Desi</i>      | Ca_Desig_Chr01               | 791180                         | (A/C)       |
| 24461       | CadSNP56       | <i>Desi</i>      | Ca_Desig_Chr01               | 807232                         | (T/C)       |
| 24462       | CadSNP57       | <i>Desi</i>      | Ca_Desig_Chr01               | 807195                         | (C/T)       |
| 24463       | CadSNP58       | <i>Desi</i>      | Ca_Desig_Chr01               | 836330                         | (G/T)       |
| 24464       | CadSNP59       | <i>Desi</i>      | Ca_Desig_Chr01               | 836351                         | (C/T)       |
| 24465       | CadSNP60       | <i>Desi</i>      | Ca_Desig_Chr01               | 836381                         | (T/C)       |
| 24466       | CadSNP61       | <i>Desi</i>      | Ca_Desig_Chr01               | 836365                         | (C/T)       |
| 24467       | CadSNP62       | <i>Desi</i>      | Ca_Desig_Chr01               | 836796                         | (C/G)       |
| 24468       | CadSNP63       | <i>Desi</i>      | Ca_Desig_Chr01               | 836859                         | (G/A)       |
| 24469       | CadSNP64       | <i>Desi</i>      | Ca_Desig_Chr01               | 836842                         | (T/G)       |
| 24470       | CadSNP65       | <i>Desi</i>      | Ca_Desig_Chr01               | 845508                         | (C/T)       |
| 24471       | CadSNP66       | <i>Desi</i>      | Ca_Desig_Chr01               | 872280                         | (C/T)       |

| <b>S.N.</b> | <b>SNP IDs</b> | <b>Cultivars</b> | <b>Chromosomes/scaffolds</b> | <b>Physical positions (bp)</b> | <b>SNPs</b> |
|-------------|----------------|------------------|------------------------------|--------------------------------|-------------|
| 24472       | CadSNP67       | <i>Desi</i>      | Ca_Desig_Chr01               | 872247                         | (G/A)       |
| 24473       | CadSNP68       | <i>Desi</i>      | Ca_Desig_Chr01               | 885647                         | (A/C)       |
| 24474       | CadSNP69       | <i>Desi</i>      | Ca_Desig_Chr01               | 885643                         | (C/T)       |
| 24475       | CadSNP70       | <i>Desi</i>      | Ca_Desig_Chr01               | 885745                         | (G/T)       |
| 24476       | CadSNP71       | <i>Desi</i>      | Ca_Desig_Chr01               | 965708                         | (T/C)       |
| 24477       | CadSNP72       | <i>Desi</i>      | Ca_Desig_Chr01               | 965885                         | (T/C)       |
| 24478       | CadSNP73       | <i>Desi</i>      | Ca_Desig_Chr01               | 965884                         | (G/A)       |
| 24479       | CadSNP74       | <i>Desi</i>      | Ca_Desig_Chr01               | 965854                         | (T/C)       |
| 24480       | CadSNP75       | <i>Desi</i>      | Ca_Desig_Chr01               | 968375                         | (T/C)       |
| 24481       | CadSNP76       | <i>Desi</i>      | Ca_Desig_Chr01               | 973945                         | (G/T)       |
| 24482       | CadSNP77       | <i>Desi</i>      | Ca_Desig_Chr01               | 973954                         | (C/T)       |
| 24483       | CadSNP78       | <i>Desi</i>      | Ca_Desig_Chr01               | 978116                         | (T/C)       |
| 24484       | CadSNP79       | <i>Desi</i>      | Ca_Desig_Chr01               | 978133                         | (T/A)       |
| 24485       | CadSNP80       | <i>Desi</i>      | Ca_Desig_Chr01               | 983043                         | (C/A)       |
| 24486       | CadSNP81       | <i>Desi</i>      | Ca_Desig_Chr01               | 983173                         | (G/A)       |
| 24487       | CadSNP82       | <i>Desi</i>      | Ca_Desig_Chr01               | 983203                         | (G/T)       |
| 24488       | CadSNP83       | <i>Desi</i>      | Ca_Desig_Chr01               | 992175                         | (G/A)       |
| 24489       | CadSNP84       | <i>Desi</i>      | Ca_Desig_Chr01               | 992174                         | (C/T)       |
| 24490       | CadSNP85       | <i>Desi</i>      | Ca_Desig_Chr01               | 999613                         | (T/C)       |
| 24491       | CadSNP86       | <i>Desi</i>      | Ca_Desig_Chr01               | 1025432                        | (T/C)       |
| 24492       | CadSNP87       | <i>Desi</i>      | Ca_Desig_Chr01               | 1025458                        | (C/T)       |
| 24493       | CadSNP88       | <i>Desi</i>      | Ca_Desig_Chr01               | 1025593                        | (C/A)       |
| 24494       | CadSNP89       | <i>Desi</i>      | Ca_Desig_Chr01               | 1025590                        | (A/G)       |
| 24495       | CadSNP90       | <i>Desi</i>      | Ca_Desig_Chr01               | 1069295                        | (A/C)       |
| 24496       | CadSNP91       | <i>Desi</i>      | Ca_Desig_Chr01               | 1069436                        | (G/A)       |
| 24497       | CadSNP92       | <i>Desi</i>      | Ca_Desig_Chr01               | 1069425                        | (A/C)       |
| 24498       | CadSNP93       | <i>Desi</i>      | Ca_Desig_Chr01               | 1069410                        | (A/T)       |
| 24499       | CadSNP94       | <i>Desi</i>      | Ca_Desig_Chr01               | 1069403                        | (A/G)       |
| 24500       | CadSNP95       | <i>Desi</i>      | Ca_Desig_Chr01               | 1071218                        | (C/T)       |
| 24501       | CadSNP96       | <i>Desi</i>      | Ca_Desig_Chr01               | 1071230                        | (C/T)       |
| 24502       | CadSNP97       | <i>Desi</i>      | Ca_Desig_Chr01               | 1071343                        | (G/A)       |
| 24503       | CadSNP98       | <i>Desi</i>      | Ca_Desig_Chr01               | 1071275                        | (T/C)       |
| 24504       | CadSNP99       | <i>Desi</i>      | Ca_Desig_Chr01               | 1072524                        | (A/T)       |
| 24505       | CadSNP100      | <i>Desi</i>      | Ca_Desig_Chr01               | 1072532                        | (C/T)       |
| 24506       | CadSNP101      | <i>Desi</i>      | Ca_Desig_Chr01               | 1072623                        | (G/A)       |
| 24507       | CadSNP102      | <i>Desi</i>      | Ca_Desig_Chr01               | 1072955                        | (A/G)       |
| 24508       | CadSNP103      | <i>Desi</i>      | Ca_Desig_Chr01               | 1072973                        | (T/C)       |
| 24509       | CadSNP104      | <i>Desi</i>      | Ca_Desig_Chr01               | 1072976                        | (A/G)       |

| <b>S.N.</b> | <b>SNP IDs</b> | <b>Cultivars</b> | <b>Chromosomes/scaffolds</b> | <b>Physical positions (bp)</b> | <b>SNPs</b> |
|-------------|----------------|------------------|------------------------------|--------------------------------|-------------|
| 24510       | CadSNP105      | <i>Desi</i>      | Ca_Desig_Chr01               | 1073000                        | (A/T)       |
| 24511       | CadSNP106      | <i>Desi</i>      | Ca_Desig_Chr01               | 1073059                        | (G/A)       |
| 24512       | CadSNP107      | <i>Desi</i>      | Ca_Desig_Chr01               | 1073054                        | (A/G)       |
| 24513       | CadSNP108      | <i>Desi</i>      | Ca_Desig_Chr01               | 1073048                        | (G/A)       |
| 24514       | CadSNP109      | <i>Desi</i>      | Ca_Desig_Chr01               | 1126922                        | (G/C)       |
| 24515       | CadSNP110      | <i>Desi</i>      | Ca_Desig_Chr01               | 1140358                        | (A/G)       |
| 24516       | CadSNP111      | <i>Desi</i>      | Ca_Desig_Chr01               | 1140485                        | (A/T)       |
| 24517       | CadSNP112      | <i>Desi</i>      | Ca_Desig_Chr01               | 1145410                        | (A/G)       |
| 24518       | CadSNP113      | <i>Desi</i>      | Ca_Desig_Chr01               | 1145493                        | (G/T)       |
| 24519       | CadSNP114      | <i>Desi</i>      | Ca_Desig_Chr01               | 1146141                        | (C/T)       |
| 24520       | CadSNP115      | <i>Desi</i>      | Ca_Desig_Chr01               | 1146138                        | (T/G)       |
| 24521       | CadSNP116      | <i>Desi</i>      | Ca_Desig_Chr01               | 1146211                        | (C/T)       |
| 24522       | CadSNP117      | <i>Desi</i>      | Ca_Desig_Chr01               | 1146466                        | (C/T)       |
| 24523       | CadSNP118      | <i>Desi</i>      | Ca_Desig_Chr01               | 1146471                        | (A/G)       |
| 24524       | CadSNP119      | <i>Desi</i>      | Ca_Desig_Chr01               | 1146489                        | (C/T)       |
| 24525       | CadSNP120      | <i>Desi</i>      | Ca_Desig_Chr01               | 1146490                        | (G/A)       |
| 24526       | CadSNP121      | <i>Desi</i>      | Ca_Desig_Chr01               | 1146659                        | (C/T)       |
| 24527       | CadSNP122      | <i>Desi</i>      | Ca_Desig_Chr01               | 1146626                        | (C/A)       |
| 24528       | CadSNP123      | <i>Desi</i>      | Ca_Desig_Chr01               | 1146611                        | (C/G)       |
| 24529       | CadSNP124      | <i>Desi</i>      | Ca_Desig_Chr01               | 1156112                        | (A/G)       |
| 24530       | CadSNP125      | <i>Desi</i>      | Ca_Desig_Chr01               | 1189681                        | (C/G)       |
| 24531       | CadSNP126      | <i>Desi</i>      | Ca_Desig_Chr01               | 1189628                        | (C/A)       |
| 24532       | CadSNP127      | <i>Desi</i>      | Ca_Desig_Chr01               | 1189627                        | (T/A)       |
| 24533       | CadSNP128      | <i>Desi</i>      | Ca_Desig_Chr01               | 1189626                        | (G/C)       |
| 24534       | CadSNP129      | <i>Desi</i>      | Ca_Desig_Chr01               | 1234998                        | (A/T)       |
| 24535       | CadSNP130      | <i>Desi</i>      | Ca_Desig_Chr01               | 1234995                        | (G/A)       |
| 24536       | CadSNP131      | <i>Desi</i>      | Ca_Desig_Chr01               | 1234986                        | (A/G)       |
| 24537       | CadSNP132      | <i>Desi</i>      | Ca_Desig_Chr01               | 1234985                        | (A/G)       |
| 24538       | CadSNP133      | <i>Desi</i>      | Ca_Desig_Chr01               | 1234977                        | (G/T)       |
| 24539       | CadSNP134      | <i>Desi</i>      | Ca_Desig_Chr01               | 1271491                        | (C/T)       |
| 24540       | CadSNP135      | <i>Desi</i>      | Ca_Desig_Chr01               | 1271498                        | (A/T)       |
| 24541       | CadSNP136      | <i>Desi</i>      | Ca_Desig_Chr01               | 1271686                        | (G/A)       |
| 24542       | CadSNP137      | <i>Desi</i>      | Ca_Desig_Chr01               | 1271654                        | (T/G)       |
| 24543       | CadSNP138      | <i>Desi</i>      | Ca_Desig_Chr01               | 1375921                        | (C/G)       |
| 24544       | CadSNP139      | <i>Desi</i>      | Ca_Desig_Chr01               | 1384553                        | (C/T)       |
| 24545       | CadSNP140      | <i>Desi</i>      | Ca_Desig_Chr01               | 1389951                        | (C/T)       |
| 24546       | CadSNP141      | <i>Desi</i>      | Ca_Desig_Chr01               | 1390763                        | (T/C)       |
| 24547       | CadSNP142      | <i>Desi</i>      | Ca_Desig_Chr01               | 1445548                        | (T/C)       |



| <b>S.N.</b> | <b>SNP IDs</b> | <b>Cultivars</b> | <b>Chromosomes/scaffolds</b> | <b>Physical positions (bp)</b> | <b>SNPs</b> |
|-------------|----------------|------------------|------------------------------|--------------------------------|-------------|
| 24548       | CadSNP143      | <i>Desi</i>      | Ca_Desig_Chr01               | 1451002                        | (A/G)       |
| 24549       | CadSNP144      | <i>Desi</i>      | Ca_Desig_Chr01               | 1451028                        | (A/T)       |
| 24550       | CadSNP145      | <i>Desi</i>      | Ca_Desig_Chr01               | 1463203                        | (T/C)       |
| 24551       | CadSNP146      | <i>Desi</i>      | Ca_Desig_Chr01               | 1463234                        | (C/T)       |
| 24552       | CadSNP147      | <i>Desi</i>      | Ca_Desig_Chr01               | 1463270                        | (A/C)       |
| 24553       | CadSNP148      | <i>Desi</i>      | Ca_Desig_Chr01               | 1463335                        | (C/T)       |
| 24554       | CadSNP149      | <i>Desi</i>      | Ca_Desig_Chr01               | 1479425                        | (T/C)       |
| 24555       | CadSNP150      | <i>Desi</i>      | Ca_Desig_Chr01               | 1479437                        | (T/C)       |
| 24556       | CadSNP151      | <i>Desi</i>      | Ca_Desig_Chr01               | 1480187                        | (T/C)       |
| 24557       | CadSNP152      | <i>Desi</i>      | Ca_Desig_Chr01               | 1486086                        | (G/C)       |
| 24558       | CadSNP153      | <i>Desi</i>      | Ca_Desig_Chr01               | 1486057                        | (A/C)       |
| 24559       | CadSNP154      | <i>Desi</i>      | Ca_Desig_Chr01               | 1522221                        | (T/C)       |
| 24560       | CadSNP155      | <i>Desi</i>      | Ca_Desig_Chr01               | 1526742                        | (G/T)       |
| 24561       | CadSNP156      | <i>Desi</i>      | Ca_Desig_Chr01               | 1526741                        | (C/A)       |
| 24562       | CadSNP157      | <i>Desi</i>      | Ca_Desig_Chr01               | 1553951                        | (A/G)       |
| 24563       | CadSNP158      | <i>Desi</i>      | Ca_Desig_Chr01               | 1553958                        | (A/G)       |
| 24564       | CadSNP159      | <i>Desi</i>      | Ca_Desig_Chr01               | 1598211                        | (C/T)       |
| 24565       | CadSNP160      | <i>Desi</i>      | Ca_Desig_Chr01               | 1627093                        | (G/T)       |
| 24566       | CadSNP161      | <i>Desi</i>      | Ca_Desig_Chr01               | 1632231                        | (G/A)       |
| 24567       | CadSNP162      | <i>Desi</i>      | Ca_Desig_Chr01               | 1638965                        | (T/A)       |
| 24568       | CadSNP163      | <i>Desi</i>      | Ca_Desig_Chr01               | 1639227                        | (C/G)       |
| 24569       | CadSNP164      | <i>Desi</i>      | Ca_Desig_Chr01               | 1727845                        | (T/A)       |
| 24570       | CadSNP165      | <i>Desi</i>      | Ca_Desig_Chr01               | 1787370                        | (A/T)       |
| 24571       | CadSNP166      | <i>Desi</i>      | Ca_Desig_Chr01               | 1815665                        | (T/C)       |
| 24572       | CadSNP167      | <i>Desi</i>      | Ca_Desig_Chr01               | 1826921                        | (A/G)       |
| 24573       | CadSNP168      | <i>Desi</i>      | Ca_Desig_Chr01               | 1828118                        | (A/G)       |
| 24574       | CadSNP169      | <i>Desi</i>      | Ca_Desig_Chr01               | 1828194                        | (C/G)       |
| 24575       | CadSNP170      | <i>Desi</i>      | Ca_Desig_Chr01               | 1828281                        | (A/C)       |
| 24576       | CadSNP171      | <i>Desi</i>      | Ca_Desig_Chr01               | 1838149                        | (C/G)       |
| 24577       | CadSNP172      | <i>Desi</i>      | Ca_Desig_Chr01               | 1839807                        | (A/G)       |
| 24578       | CadSNP173      | <i>Desi</i>      | Ca_Desig_Chr01               | 1842557                        | (C/T)       |
| 24579       | CadSNP174      | <i>Desi</i>      | Ca_Desig_Chr01               | 1842545                        | (T/C)       |
| 24580       | CadSNP175      | <i>Desi</i>      | Ca_Desig_Chr01               | 1851780                        | (A/T)       |
| 24581       | CadSNP176      | <i>Desi</i>      | Ca_Desig_Chr01               | 1881482                        | (A/G)       |
| 24582       | CadSNP177      | <i>Desi</i>      | Ca_Desig_Chr01               | 1881584                        | (A/G)       |
| 24583       | CadSNP178      | <i>Desi</i>      | Ca_Desig_Chr01               | 1904344                        | (T/C)       |
| 24584       | CadSNP179      | <i>Desi</i>      | Ca_Desig_Chr01               | 1904458                        | (G/A)       |
| 24585       | CadSNP180      | <i>Desi</i>      | Ca_Desig_Chr01               | 1904473                        | (C/T)       |

| <b>S.N.</b> | <b>SNP IDs</b> | <b>Cultivars</b> | <b>Chromosomes/scaffolds</b> | <b>Physical positions (bp)</b> | <b>SNPs</b> |
|-------------|----------------|------------------|------------------------------|--------------------------------|-------------|
| 24586       | CadSNP181      | <i>Desi</i>      | Ca_Desig_Chr01               | 1906298                        | (A/C)       |
| 24587       | CadSNP182      | <i>Desi</i>      | Ca_Desig_Chr01               | 1906300                        | (T/G)       |
| 24588       | CadSNP183      | <i>Desi</i>      | Ca_Desig_Chr01               | 1906308                        | (A/G)       |
| 24589       | CadSNP184      | <i>Desi</i>      | Ca_Desig_Chr01               | 1906324                        | (A/C)       |
| 24590       | CadSNP185      | <i>Desi</i>      | Ca_Desig_Chr01               | 1906333                        | (A/C)       |
| 24591       | CadSNP186      | <i>Desi</i>      | Ca_Desig_Chr01               | 1906363                        | (G/A)       |
| 24592       | CadSNP187      | <i>Desi</i>      | Ca_Desig_Chr01               | 1906417                        | (G/A)       |
| 24593       | CadSNP188      | <i>Desi</i>      | Ca_Desig_Chr01               | 1912864                        | (T/A)       |
| 24594       | CadSNP189      | <i>Desi</i>      | Ca_Desig_Chr01               | 1912850                        | (A/C)       |
| 24595       | CadSNP190      | <i>Desi</i>      | Ca_Desig_Chr01               | 1912820                        | (C/T)       |
| 24596       | CadSNP191      | <i>Desi</i>      | Ca_Desig_Chr01               | 1920014                        | (C/G)       |
| 24597       | CadSNP192      | <i>Desi</i>      | Ca_Desig_Chr01               | 1920100                        | (A/G)       |
| 24598       | CadSNP193      | <i>Desi</i>      | Ca_Desig_Chr01               | 1936976                        | (C/T)       |
| 24599       | CadSNP194      | <i>Desi</i>      | Ca_Desig_Chr01               | 1937117                        | (A/G)       |
| 24600       | CadSNP195      | <i>Desi</i>      | Ca_Desig_Chr01               | 1937351                        | (C/T)       |
| 24601       | CadSNP196      | <i>Desi</i>      | Ca_Desig_Chr01               | 1960896                        | (A/C)       |
| 24602       | CadSNP197      | <i>Desi</i>      | Ca_Desig_Chr01               | 1960988                        | (A/T)       |
| 24603       | CadSNP198      | <i>Desi</i>      | Ca_Desig_Chr01               | 1971575                        | (C/T)       |
| 24604       | CadSNP199      | <i>Desi</i>      | Ca_Desig_Chr01               | 1982239                        | (C/A)       |
| 24605       | CadSNP200      | <i>Desi</i>      | Ca_Desig_Chr01               | 1982267                        | (T/G)       |
| 24606       | CadSNP201      | <i>Desi</i>      | Ca_Desig_Chr01               | 2021813                        | (A/G)       |
| 24607       | CadSNP202      | <i>Desi</i>      | Ca_Desig_Chr01               | 2021754                        | (T/A)       |
| 24608       | CadSNP203      | <i>Desi</i>      | Ca_Desig_Chr01               | 2044121                        | (A/G)       |
| 24609       | CadSNP204      | <i>Desi</i>      | Ca_Desig_Chr01               | 2067290                        | (C/A)       |
| 24610       | CadSNP205      | <i>Desi</i>      | Ca_Desig_Chr01               | 2084464                        | (G/A)       |
| 24611       | CadSNP206      | <i>Desi</i>      | Ca_Desig_Chr01               | 2084449                        | (A/G)       |
| 24612       | CadSNP207      | <i>Desi</i>      | Ca_Desig_Chr01               | 2084396                        | (T/G)       |
| 24613       | CadSNP208      | <i>Desi</i>      | Ca_Desig_Chr01               | 2084474                        | (C/A)       |
| 24614       | CadSNP209      | <i>Desi</i>      | Ca_Desig_Chr01               | 2084506                        | (G/T)       |
| 24615       | CadSNP210      | <i>Desi</i>      | Ca_Desig_Chr01               | 2084548                        | (C/G)       |
| 24616       | CadSNP211      | <i>Desi</i>      | Ca_Desig_Chr01               | 2185003                        | (C/T)       |
| 24617       | CadSNP212      | <i>Desi</i>      | Ca_Desig_Chr01               | 2213640                        | (A/G)       |
| 24618       | CadSNP213      | <i>Desi</i>      | Ca_Desig_Chr01               | 2213694                        | (C/T)       |
| 24619       | CadSNP214      | <i>Desi</i>      | Ca_Desig_Chr01               | 2213700                        | (C/T)       |
| 24620       | CadSNP215      | <i>Desi</i>      | Ca_Desig_Chr01               | 2213762                        | (T/C)       |
| 24621       | CadSNP216      | <i>Desi</i>      | Ca_Desig_Chr01               | 2213817                        | (A/G)       |
| 24622       | CadSNP217      | <i>Desi</i>      | Ca_Desig_Chr01               | 2214078                        | (A/T)       |
| 24623       | CadSNP218      | <i>Desi</i>      | Ca_Desig_Chr01               | 2214038                        | (A/T)       |

| <b>S.N.</b> | <b>SNP IDs</b> | <b>Cultivars</b> | <b>Chromosomes/scaffolds</b> | <b>Physical positions (bp)</b> | <b>SNPs</b> |
|-------------|----------------|------------------|------------------------------|--------------------------------|-------------|
| 24624       | CadSNP219      | <i>Desi</i>      | Ca_Desig_Chr01               | 2214019                        | (A/G)       |
| 24625       | CadSNP220      | <i>Desi</i>      | Ca_Desig_Chr01               | 2249232                        | (A/G)       |
| 24626       | CadSNP221      | <i>Desi</i>      | Ca_Desig_Chr01               | 2263604                        | (C/A)       |
| 24627       | CadSNP222      | <i>Desi</i>      | Ca_Desig_Chr01               | 2281554                        | (T/C)       |
| 24628       | CadSNP223      | <i>Desi</i>      | Ca_Desig_Chr01               | 2281552                        | (C/T)       |
| 24629       | CadSNP224      | <i>Desi</i>      | Ca_Desig_Chr01               | 2292933                        | (T/C)       |
| 24630       | CadSNP225      | <i>Desi</i>      | Ca_Desig_Chr01               | 2322362                        | (G/A)       |
| 24631       | CadSNP226      | <i>Desi</i>      | Ca_Desig_Chr01               | 2322455                        | (A/C)       |
| 24632       | CadSNP227      | <i>Desi</i>      | Ca_Desig_Chr01               | 2327411                        | (T/G)       |
| 24633       | CadSNP228      | <i>Desi</i>      | Ca_Desig_Chr01               | 2349214                        | (C/A)       |
| 24634       | CadSNP229      | <i>Desi</i>      | Ca_Desig_Chr01               | 2349258                        | (G/A)       |
| 24635       | CadSNP230      | <i>Desi</i>      | Ca_Desig_Chr01               | 2349306                        | (C/T)       |
| 24636       | CadSNP231      | <i>Desi</i>      | Ca_Desig_Chr01               | 2350002                        | (T/C)       |
| 24637       | CadSNP232      | <i>Desi</i>      | Ca_Desig_Chr01               | 2356768                        | (A/G)       |
| 24638       | CadSNP233      | <i>Desi</i>      | Ca_Desig_Chr01               | 2356772                        | (A/T)       |
| 24639       | CadSNP234      | <i>Desi</i>      | Ca_Desig_Chr01               | 2438649                        | (T/A)       |
| 24640       | CadSNP235      | <i>Desi</i>      | Ca_Desig_Chr01               | 2438719                        | (T/A)       |
| 24641       | CadSNP236      | <i>Desi</i>      | Ca_Desig_Chr01               | 2440248                        | (C/T)       |
| 24642       | CadSNP237      | <i>Desi</i>      | Ca_Desig_Chr01               | 2448997                        | (C/T)       |
| 24643       | CadSNP238      | <i>Desi</i>      | Ca_Desig_Chr01               | 2456844                        | (T/G)       |
| 24644       | CadSNP239      | <i>Desi</i>      | Ca_Desig_Chr01               | 2457014                        | (A/C)       |
| 24645       | CadSNP240      | <i>Desi</i>      | Ca_Desig_Chr01               | 2471770                        | (G/T)       |
| 24646       | CadSNP241      | <i>Desi</i>      | Ca_Desig_Chr01               | 2471753                        | (G/A)       |
| 24647       | CadSNP242      | <i>Desi</i>      | Ca_Desig_Chr01               | 2471803                        | (A/G)       |
| 24648       | CadSNP243      | <i>Desi</i>      | Ca_Desig_Chr01               | 2471865                        | (T/C)       |
| 24649       | CadSNP244      | <i>Desi</i>      | Ca_Desig_Chr01               | 2471996                        | (G/A)       |
| 24650       | CadSNP245      | <i>Desi</i>      | Ca_Desig_Chr01               | 2471946                        | (C/A)       |
| 24651       | CadSNP246      | <i>Desi</i>      | Ca_Desig_Chr01               | 2471938                        | (G/T)       |
| 24652       | CadSNP247      | <i>Desi</i>      | Ca_Desig_Chr01               | 2471924                        | (G/A)       |
| 24653       | CadSNP248      | <i>Desi</i>      | Ca_Desig_Chr01               | 2471923                        | (C/A)       |
| 24654       | CadSNP249      | <i>Desi</i>      | Ca_Desig_Chr01               | 2491534                        | (T/C)       |
| 24655       | CadSNP250      | <i>Desi</i>      | Ca_Desig_Chr01               | 2491494                        | (G/A)       |
| 24656       | CadSNP251      | <i>Desi</i>      | Ca_Desig_Chr01               | 2491479                        | (T/C)       |
| 24657       | CadSNP252      | <i>Desi</i>      | Ca_Desig_Chr01               | 2536793                        | (A/G)       |
| 24658       | CadSNP253      | <i>Desi</i>      | Ca_Desig_Chr01               | 2541722                        | (T/C)       |
| 24659       | CadSNP254      | <i>Desi</i>      | Ca_Desig_Chr01               | 2553114                        | (C/T)       |
| 24660       | CadSNP255      | <i>Desi</i>      | Ca_Desig_Chr01               | 2553120                        | (A/C)       |
| 24661       | CadSNP256      | <i>Desi</i>      | Ca_Desig_Chr01               | 2553187                        | (A/G)       |

| <b>S.N.</b> | <b>SNP IDs</b> | <b>Cultivars</b> | <b>Chromosomes/scaffolds</b> | <b>Physical positions (bp)</b> | <b>SNPs</b> |
|-------------|----------------|------------------|------------------------------|--------------------------------|-------------|
| 24662       | CadSNP257      | <i>Desi</i>      | Ca_Desig_Chr01               | 2553150                        | (C/T)       |
| 24663       | CadSNP258      | <i>Desi</i>      | Ca_Desig_Chr01               | 2554326                        | (T/G)       |
| 24664       | CadSNP259      | <i>Desi</i>      | Ca_Desig_Chr01               | 2555171                        | (C/G)       |
| 24665       | CadSNP260      | <i>Desi</i>      | Ca_Desig_Chr01               | 2573180                        | (A/C)       |
| 24666       | CadSNP261      | <i>Desi</i>      | Ca_Desig_Chr01               | 2593870                        | (C/T)       |
| 24667       | CadSNP262      | <i>Desi</i>      | Ca_Desig_Chr01               | 2637647                        | (C/G)       |
| 24668       | CadSNP263      | <i>Desi</i>      | Ca_Desig_Chr01               | 2637591                        | (T/A)       |
| 24669       | CadSNP264      | <i>Desi</i>      | Ca_Desig_Chr01               | 2637890                        | (G/C)       |
| 24670       | CadSNP265      | <i>Desi</i>      | Ca_Desig_Chr01               | 2637849                        | (C/T)       |
| 24671       | CadSNP266      | <i>Desi</i>      | Ca_Desig_Chr01               | 2775191                        | (G/A)       |
| 24672       | CadSNP267      | <i>Desi</i>      | Ca_Desig_Chr01               | 2824614                        | (G/A)       |
| 24673       | CadSNP268      | <i>Desi</i>      | Ca_Desig_Chr01               | 2856666                        | (T/C)       |
| 24674       | CadSNP269      | <i>Desi</i>      | Ca_Desig_Chr01               | 2887261                        | (C/G)       |
| 24675       | CadSNP270      | <i>Desi</i>      | Ca_Desig_Chr01               | 3010959                        | (T/C)       |
| 24676       | CadSNP271      | <i>Desi</i>      | Ca_Desig_Chr01               | 3011053                        | (T/G)       |
| 24677       | CadSNP272      | <i>Desi</i>      | Ca_Desig_Chr01               | 3073657                        | (C/T)       |
| 24678       | CadSNP273      | <i>Desi</i>      | Ca_Desig_Chr01               | 3083080                        | (G/T)       |
| 24679       | CadSNP274      | <i>Desi</i>      | Ca_Desig_Chr01               | 3088883                        | (G/T)       |
| 24680       | CadSNP275      | <i>Desi</i>      | Ca_Desig_Chr01               | 3151378                        | (A/C)       |
| 24681       | CadSNP276      | <i>Desi</i>      | Ca_Desig_Chr01               | 3151834                        | (G/C)       |
| 24682       | CadSNP277      | <i>Desi</i>      | Ca_Desig_Chr01               | 3192625                        | (C/T)       |
| 24683       | CadSNP278      | <i>Desi</i>      | Ca_Desig_Chr01               | 3192622                        | (C/G)       |
| 24684       | CadSNP279      | <i>Desi</i>      | Ca_Desig_Chr01               | 3192562                        | (C/G)       |
| 24685       | CadSNP280      | <i>Desi</i>      | Ca_Desig_Chr01               | 3328510                        | (C/A)       |
| 24686       | CadSNP281      | <i>Desi</i>      | Ca_Desig_Chr01               | 3328604                        | (G/A)       |
| 24687       | CadSNP282      | <i>Desi</i>      | Ca_Desig_Chr01               | 3366300                        | (T/C)       |
| 24688       | CadSNP283      | <i>Desi</i>      | Ca_Desig_Chr01               | 3368165                        | (A/C)       |
| 24689       | CadSNP284      | <i>Desi</i>      | Ca_Desig_Chr01               | 3370851                        | (A/T)       |
| 24690       | CadSNP285      | <i>Desi</i>      | Ca_Desig_Chr01               | 3370914                        | (G/A)       |
| 24691       | CadSNP286      | <i>Desi</i>      | Ca_Desig_Chr01               | 3390238                        | (G/T)       |
| 24692       | CadSNP287      | <i>Desi</i>      | Ca_Desig_Chr01               | 3425891                        | (C/T)       |
| 24693       | CadSNP288      | <i>Desi</i>      | Ca_Desig_Chr01               | 3427492                        | (G/A)       |
| 24694       | CadSNP289      | <i>Desi</i>      | Ca_Desig_Chr01               | 3435226                        | (G/A)       |
| 24695       | CadSNP290      | <i>Desi</i>      | Ca_Desig_Chr01               | 3435227                        | (C/T)       |
| 24696       | CadSNP291      | <i>Desi</i>      | Ca_Desig_Chr01               | 3439224                        | (T/C)       |
| 24697       | CadSNP292      | <i>Desi</i>      | Ca_Desig_Chr01               | 3440875                        | (C/A)       |
| 24698       | CadSNP293      | <i>Desi</i>      | Ca_Desig_Chr01               | 3444610                        | (A/G)       |
| 24699       | CadSNP294      | <i>Desi</i>      | Ca_Desig_Chr01               | 3444681                        | (G/T)       |

| <b>S.N.</b> | <b>SNP IDs</b> | <b>Cultivars</b> | <b>Chromosomes/scaffolds</b> | <b>Physical positions (bp)</b> | <b>SNPs</b> |
|-------------|----------------|------------------|------------------------------|--------------------------------|-------------|
| 24700       | CadSNP295      | <i>Desi</i>      | Ca_Desig_Chr01               | 3444708                        | (T/C)       |
| 24701       | CadSNP296      | <i>Desi</i>      | Ca_Desig_Chr01               | 3444696                        | (C/A)       |
| 24702       | CadSNP297      | <i>Desi</i>      | Ca_Desig_Chr01               | 3452397                        | (C/T)       |
| 24703       | CadSNP298      | <i>Desi</i>      | Ca_Desig_Chr01               | 3545305                        | (T/G)       |
| 24704       | CadSNP299      | <i>Desi</i>      | Ca_Desig_Chr01               | 3545332                        | (T/G)       |
| 24705       | CadSNP300      | <i>Desi</i>      | Ca_Desig_Chr01               | 3585574                        | (G/T)       |
| 24706       | CadSNP301      | <i>Desi</i>      | Ca_Desig_Chr01               | 3606976                        | (C/T)       |
| 24707       | CadSNP302      | <i>Desi</i>      | Ca_Desig_Chr01               | 3633117                        | (T/C)       |
| 24708       | CadSNP303      | <i>Desi</i>      | Ca_Desig_Chr01               | 3674413                        | (A/C)       |
| 24709       | CadSNP304      | <i>Desi</i>      | Ca_Desig_Chr01               | 3674854                        | (A/C)       |
| 24710       | CadSNP305      | <i>Desi</i>      | Ca_Desig_Chr01               | 3675786                        | (T/C)       |
| 24711       | CadSNP306      | <i>Desi</i>      | Ca_Desig_Chr01               | 3677607                        | (G/A)       |
| 24712       | CadSNP307      | <i>Desi</i>      | Ca_Desig_Chr01               | 3743152                        | (G/A)       |
| 24713       | CadSNP308      | <i>Desi</i>      | Ca_Desig_Chr01               | 3771750                        | (C/T)       |
| 24714       | CadSNP309      | <i>Desi</i>      | Ca_Desig_Chr01               | 3771899                        | (T/C)       |
| 24715       | CadSNP310      | <i>Desi</i>      | Ca_Desig_Chr01               | 3783317                        | (G/A)       |
| 24716       | CadSNP311      | <i>Desi</i>      | Ca_Desig_Chr01               | 3786526                        | (T/C)       |
| 24717       | CadSNP312      | <i>Desi</i>      | Ca_Desig_Chr01               | 3786523                        | (C/T)       |
| 24718       | CadSNP313      | <i>Desi</i>      | Ca_Desig_Chr01               | 3804312                        | (G/T)       |
| 24719       | CadSNP314      | <i>Desi</i>      | Ca_Desig_Chr01               | 3877417                        | (G/A)       |
| 24720       | CadSNP315      | <i>Desi</i>      | Ca_Desig_Chr01               | 3877438                        | (A/T)       |
| 24721       | CadSNP316      | <i>Desi</i>      | Ca_Desig_Chr01               | 3911580                        | (A/G)       |
| 24722       | CadSNP317      | <i>Desi</i>      | Ca_Desig_Chr01               | 3953451                        | (C/T)       |
| 24723       | CadSNP318      | <i>Desi</i>      | Ca_Desig_Chr01               | 3963327                        | (T/C)       |
| 24724       | CadSNP319      | <i>Desi</i>      | Ca_Desig_Chr01               | 3993197                        | (C/T)       |
| 24725       | CadSNP320      | <i>Desi</i>      | Ca_Desig_Chr01               | 3993242                        | (T/G)       |
| 24726       | CadSNP321      | <i>Desi</i>      | Ca_Desig_Chr01               | 3994131                        | (G/A)       |
| 24727       | CadSNP322      | <i>Desi</i>      | Ca_Desig_Chr01               | 3995579                        | (C/T)       |
| 24728       | CadSNP323      | <i>Desi</i>      | Ca_Desig_Chr01               | 3996356                        | (C/T)       |
| 24729       | CadSNP324      | <i>Desi</i>      | Ca_Desig_Chr01               | 3996916                        | (C/T)       |
| 24730       | CadSNP325      | <i>Desi</i>      | Ca_Desig_Chr01               | 5004852                        | (G/A)       |
| 24731       | CadSNP326      | <i>Desi</i>      | Ca_Desig_Chr01               | 5004855                        | (A/C)       |
| 24732       | CadSNP327      | <i>Desi</i>      | Ca_Desig_Chr01               | 5004857                        | (G/C)       |
| 24733       | CadSNP328      | <i>Desi</i>      | Ca_Desig_Chr01               | 5004917                        | (C/A)       |
| 24734       | CadSNP329      | <i>Desi</i>      | Ca_Desig_Chr01               | 5022262                        | (G/T)       |
| 24735       | CadSNP330      | <i>Desi</i>      | Ca_Desig_Chr01               | 5022319                        | (G/A)       |
| 24736       | CadSNP331      | <i>Desi</i>      | Ca_Desig_Chr01               | 5022390                        | (C/T)       |
| 24737       | CadSNP332      | <i>Desi</i>      | Ca_Desig_Chr01               | 5039591                        | (A/G)       |

| <b>S.N.</b> | <b>SNP IDs</b> | <b>Cultivars</b> | <b>Chromosomes/scaffolds</b> | <b>Physical positions (bp)</b> | <b>SNPs</b> |
|-------------|----------------|------------------|------------------------------|--------------------------------|-------------|
| 24738       | CadSNP333      | <i>Desi</i>      | Ca_Desig_Chr01               | 5039614                        | (C/A)       |
| 24739       | CadSNP334      | <i>Desi</i>      | Ca_Desig_Chr01               | 5040610                        | (A/G)       |
| 24740       | CadSNP335      | <i>Desi</i>      | Ca_Desig_Chr01               | 5040663                        | (A/G)       |
| 24741       | CadSNP336      | <i>Desi</i>      | Ca_Desig_Chr01               | 5056212                        | (T/C)       |
| 24742       | CadSNP337      | <i>Desi</i>      | Ca_Desig_Chr01               | 5056260                        | (A/C)       |
| 24743       | CadSNP338      | <i>Desi</i>      | Ca_Desig_Chr01               | 5056328                        | (T/C)       |
| 24744       | CadSNP339      | <i>Desi</i>      | Ca_Desig_Chr01               | 5059326                        | (A/G)       |
| 24745       | CadSNP340      | <i>Desi</i>      | Ca_Desig_Chr01               | 5061066                        | (T/A)       |
| 24746       | CadSNP341      | <i>Desi</i>      | Ca_Desig_Chr01               | 5061125                        | (G/C)       |
| 24747       | CadSNP342      | <i>Desi</i>      | Ca_Desig_Chr01               | 5069716                        | (A/G)       |
| 24748       | CadSNP343      | <i>Desi</i>      | Ca_Desig_Chr01               | 5069743                        | (A/G)       |
| 24749       | CadSNP344      | <i>Desi</i>      | Ca_Desig_Chr01               | 5094757                        | (G/C)       |
| 24750       | CadSNP345      | <i>Desi</i>      | Ca_Desig_Chr01               | 5094752                        | (G/A)       |
| 24751       | CadSNP346      | <i>Desi</i>      | Ca_Desig_Chr01               | 5161857                        | (C/T)       |
| 24752       | CadSNP347      | <i>Desi</i>      | Ca_Desig_Chr01               | 5197254                        | (A/G)       |
| 24753       | CadSNP348      | <i>Desi</i>      | Ca_Desig_Chr01               | 5197445                        | (C/A)       |
| 24754       | CadSNP349      | <i>Desi</i>      | Ca_Desig_Chr01               | 5202104                        | (T/C)       |
| 24755       | CadSNP350      | <i>Desi</i>      | Ca_Desig_Chr01               | 5202057                        | (A/T)       |
| 24756       | CadSNP351      | <i>Desi</i>      | Ca_Desig_Chr01               | 5218664                        | (T/C)       |
| 24757       | CadSNP352      | <i>Desi</i>      | Ca_Desig_Chr01               | 5227055                        | (C/A)       |
| 24758       | CadSNP353      | <i>Desi</i>      | Ca_Desig_Chr01               | 5240171                        | (G/A)       |
| 24759       | CadSNP354      | <i>Desi</i>      | Ca_Desig_Chr01               | 5292807                        | (A/G)       |
| 24760       | CadSNP355      | <i>Desi</i>      | Ca_Desig_Chr01               | 5292810                        | (A/T)       |
| 24761       | CadSNP356      | <i>Desi</i>      | Ca_Desig_Chr01               | 5348734                        | (A/G)       |
| 24762       | CadSNP357      | <i>Desi</i>      | Ca_Desig_Chr01               | 5348941                        | (T/C)       |
| 24763       | CadSNP358      | <i>Desi</i>      | Ca_Desig_Chr01               | 5428980                        | (C/A)       |
| 24764       | CadSNP359      | <i>Desi</i>      | Ca_Desig_Chr01               | 5446596                        | (A/C)       |
| 24765       | CadSNP360      | <i>Desi</i>      | Ca_Desig_Chr01               | 5446549                        | (A/C)       |
| 24766       | CadSNP361      | <i>Desi</i>      | Ca_Desig_Chr01               | 5498868                        | (A/G)       |
| 24767       | CadSNP362      | <i>Desi</i>      | Ca_Desig_Chr01               | 5498890                        | (A/G)       |
| 24768       | CadSNP363      | <i>Desi</i>      | Ca_Desig_Chr01               | 5506578                        | (G/C)       |
| 24769       | CadSNP364      | <i>Desi</i>      | Ca_Desig_Chr01               | 5511110                        | (A/T)       |
| 24770       | CadSNP365      | <i>Desi</i>      | Ca_Desig_Chr01               | 5511140                        | (A/T)       |
| 24771       | CadSNP366      | <i>Desi</i>      | Ca_Desig_Chr01               | 5511162                        | (T/G)       |
| 24772       | CadSNP367      | <i>Desi</i>      | Ca_Desig_Chr01               | 5511149                        | (T/C)       |
| 24773       | CadSNP368      | <i>Desi</i>      | Ca_Desig_Chr01               | 5537208                        | (C/T)       |
| 24774       | CadSNP369      | <i>Desi</i>      | Ca_Desig_Chr01               | 5537211                        | (G/A)       |
| 24775       | CadSNP370      | <i>Desi</i>      | Ca_Desig_Chr01               | 5537394                        | (A/G)       |

| <b>S.N.</b> | <b>SNP IDs</b> | <b>Cultivars</b> | <b>Chromosomes/scaffolds</b> | <b>Physical positions (bp)</b> | <b>SNPs</b> |
|-------------|----------------|------------------|------------------------------|--------------------------------|-------------|
| 24776       | CadSNP371      | <i>Desi</i>      | Ca_Desig_Chr01               | 5537397                        | (T/A)       |
| 24777       | CadSNP372      | <i>Desi</i>      | Ca_Desig_Chr01               | 5537508                        | (C/T)       |
| 24778       | CadSNP373      | <i>Desi</i>      | Ca_Desig_Chr01               | 5555967                        | (C/T)       |
| 24779       | CadSNP374      | <i>Desi</i>      | Ca_Desig_Chr01               | 5556081                        | (G/A)       |
| 24780       | CadSNP375      | <i>Desi</i>      | Ca_Desig_Chr01               | 5568121                        | (A/C)       |
| 24781       | CadSNP376      | <i>Desi</i>      | Ca_Desig_Chr01               | 5580120                        | (C/T)       |
| 24782       | CadSNP377      | <i>Desi</i>      | Ca_Desig_Chr01               | 5580193                        | (C/T)       |
| 24783       | CadSNP378      | <i>Desi</i>      | Ca_Desig_Chr01               | 5605911                        | (G/C)       |
| 24784       | CadSNP379      | <i>Desi</i>      | Ca_Desig_Chr01               | 5605923                        | (G/T)       |
| 24785       | CadSNP380      | <i>Desi</i>      | Ca_Desig_Chr01               | 5613829                        | (C/A)       |
| 24786       | CadSNP381      | <i>Desi</i>      | Ca_Desig_Chr01               | 5644131                        | (G/C)       |
| 24787       | CadSNP382      | <i>Desi</i>      | Ca_Desig_Chr01               | 5645053                        | (C/T)       |
| 24788       | CadSNP383      | <i>Desi</i>      | Ca_Desig_Chr01               | 5645050                        | (T/C)       |
| 24789       | CadSNP384      | <i>Desi</i>      | Ca_Desig_Chr01               | 5645015                        | (T/C)       |
| 24790       | CadSNP385      | <i>Desi</i>      | Ca_Desig_Chr01               | 5667771                        | (A/G)       |
| 24791       | CadSNP386      | <i>Desi</i>      | Ca_Desig_Chr01               | 5676601                        | (T/C)       |
| 24792       | CadSNP387      | <i>Desi</i>      | Ca_Desig_Chr01               | 5704265                        | (C/A)       |
| 24793       | CadSNP388      | <i>Desi</i>      | Ca_Desig_Chr01               | 5753424                        | (G/A)       |
| 24794       | CadSNP389      | <i>Desi</i>      | Ca_Desig_Chr01               | 5753449                        | (T/G)       |
| 24795       | CadSNP390      | <i>Desi</i>      | Ca_Desig_Chr01               | 5753484                        | (T/G)       |
| 24796       | CadSNP391      | <i>Desi</i>      | Ca_Desig_Chr01               | 5776338                        | (C/A)       |
| 24797       | CadSNP392      | <i>Desi</i>      | Ca_Desig_Chr01               | 5776339                        | (A/G)       |
| 24798       | CadSNP393      | <i>Desi</i>      | Ca_Desig_Chr01               | 5776369                        | (T/C)       |
| 24799       | CadSNP394      | <i>Desi</i>      | Ca_Desig_Chr01               | 5776540                        | (T/C)       |
| 24800       | CadSNP395      | <i>Desi</i>      | Ca_Desig_Chr01               | 5778096                        | (C/G)       |
| 24801       | CadSNP396      | <i>Desi</i>      | Ca_Desig_Chr01               | 5807567                        | (C/G)       |
| 24802       | CadSNP397      | <i>Desi</i>      | Ca_Desig_Chr01               | 5807642                        | (G/A)       |
| 24803       | CadSNP398      | <i>Desi</i>      | Ca_Desig_Chr01               | 5823260                        | (C/T)       |
| 24804       | CadSNP399      | <i>Desi</i>      | Ca_Desig_Chr01               | 5853627                        | (T/A)       |
| 24805       | CadSNP400      | <i>Desi</i>      | Ca_Desig_Chr01               | 5853706                        | (G/A)       |
| 24806       | CadSNP401      | <i>Desi</i>      | Ca_Desig_Chr01               | 5854373                        | (C/T)       |
| 24807       | CadSNP402      | <i>Desi</i>      | Ca_Desig_Chr01               | 6037738                        | (T/G)       |
| 24808       | CadSNP403      | <i>Desi</i>      | Ca_Desig_Chr01               | 6072236                        | (A/G)       |
| 24809       | CadSNP404      | <i>Desi</i>      | Ca_Desig_Chr01               | 6072205                        | (A/G)       |
| 24810       | CadSNP405      | <i>Desi</i>      | Ca_Desig_Chr01               | 6080835                        | (G/C)       |
| 24811       | CadSNP406      | <i>Desi</i>      | Ca_Desig_Chr01               | 6080870                        | (T/C)       |
| 24812       | CadSNP407      | <i>Desi</i>      | Ca_Desig_Chr01               | 6084027                        | (C/T)       |
| 24813       | CadSNP408      | <i>Desi</i>      | Ca_Desig_Chr01               | 6083987                        | (T/G)       |

| <b>S.N.</b> | <b>SNP IDs</b> | <b>Cultivars</b> | <b>Chromosomes/scaffolds</b> | <b>Physical positions (bp)</b> | <b>SNPs</b> |
|-------------|----------------|------------------|------------------------------|--------------------------------|-------------|
| 24814       | CadSNP409      | <i>Desi</i>      | Ca_Desig_Chr01               | 6107667                        | (T/C)       |
| 24815       | CadSNP410      | <i>Desi</i>      | Ca_Desig_Chr01               | 6107673                        | (A/C)       |
| 24816       | CadSNP411      | <i>Desi</i>      | Ca_Desig_Chr01               | 6108004                        | (C/A)       |
| 24817       | CadSNP412      | <i>Desi</i>      | Ca_Desig_Chr01               | 6108008                        | (T/G)       |
| 24818       | CadSNP413      | <i>Desi</i>      | Ca_Desig_Chr01               | 6108016                        | (C/T)       |
| 24819       | CadSNP414      | <i>Desi</i>      | Ca_Desig_Chr01               | 6108035                        | (T/A)       |
| 24820       | CadSNP415      | <i>Desi</i>      | Ca_Desig_Chr01               | 6108091                        | (T/G)       |
| 24821       | CadSNP416      | <i>Desi</i>      | Ca_Desig_Chr01               | 6108094                        | (C/T)       |
| 24822       | CadSNP417      | <i>Desi</i>      | Ca_Desig_Chr01               | 6108141                        | (T/A)       |
| 24823       | CadSNP418      | <i>Desi</i>      | Ca_Desig_Chr01               | 6108140                        | (A/G)       |
| 24824       | CadSNP419      | <i>Desi</i>      | Ca_Desig_Chr01               | 6111677                        | (A/G)       |
| 24825       | CadSNP420      | <i>Desi</i>      | Ca_Desig_Chr01               | 6111732                        | (T/G)       |
| 24826       | CadSNP421      | <i>Desi</i>      | Ca_Desig_Chr01               | 6112469                        | (C/T)       |
| 24827       | CadSNP422      | <i>Desi</i>      | Ca_Desig_Chr01               | 6112462                        | (G/A)       |
| 24828       | CadSNP423      | <i>Desi</i>      | Ca_Desig_Chr01               | 6112461                        | (A/G)       |
| 24829       | CadSNP424      | <i>Desi</i>      | Ca_Desig_Chr01               | 6112451                        | (A/G)       |
| 24830       | CadSNP425      | <i>Desi</i>      | Ca_Desig_Chr01               | 6112443                        | (A/G)       |
| 24831       | CadSNP426      | <i>Desi</i>      | Ca_Desig_Chr01               | 6112435                        | (C/A)       |
| 24832       | CadSNP427      | <i>Desi</i>      | Ca_Desig_Chr01               | 6112434                        | (T/A)       |
| 24833       | CadSNP428      | <i>Desi</i>      | Ca_Desig_Chr01               | 6112419                        | (T/G)       |
| 24834       | CadSNP429      | <i>Desi</i>      | Ca_Desig_Chr01               | 6113487                        | (T/C)       |
| 24835       | CadSNP430      | <i>Desi</i>      | Ca_Desig_Chr01               | 6113445                        | (T/C)       |
| 24836       | CadSNP431      | <i>Desi</i>      | Ca_Desig_Chr01               | 6135902                        | (A/G)       |
| 24837       | CadSNP432      | <i>Desi</i>      | Ca_Desig_Chr01               | 6141133                        | (A/C)       |
| 24838       | CadSNP433      | <i>Desi</i>      | Ca_Desig_Chr01               | 6141126                        | (A/C)       |
| 24839       | CadSNP434      | <i>Desi</i>      | Ca_Desig_Chr01               | 6149357                        | (C/A)       |
| 24840       | CadSNP435      | <i>Desi</i>      | Ca_Desig_Chr01               | 6262953                        | (A/C)       |
| 24841       | CadSNP436      | <i>Desi</i>      | Ca_Desig_Chr01               | 6262893                        | (T/A)       |
| 24842       | CadSNP437      | <i>Desi</i>      | Ca_Desig_Chr01               | 6303938                        | (A/G)       |
| 24843       | CadSNP438      | <i>Desi</i>      | Ca_Desig_Chr01               | 6303965                        | (T/G)       |
| 24844       | CadSNP439      | <i>Desi</i>      | Ca_Desig_Chr01               | 6304541                        | (A/G)       |
| 24845       | CadSNP440      | <i>Desi</i>      | Ca_Desig_Chr01               | 6313746                        | (T/A)       |
| 24846       | CadSNP441      | <i>Desi</i>      | Ca_Desig_Chr01               | 6313759                        | (T/A)       |
| 24847       | CadSNP442      | <i>Desi</i>      | Ca_Desig_Chr01               | 6318871                        | (G/T)       |
| 24848       | CadSNP443      | <i>Desi</i>      | Ca_Desig_Chr01               | 6319012                        | (A/G)       |
| 24849       | CadSNP444      | <i>Desi</i>      | Ca_Desig_Chr01               | 6319042                        | (A/C)       |
| 24850       | CadSNP445      | <i>Desi</i>      | Ca_Desig_Chr01               | 6322174                        | (A/G)       |
| 24851       | CadSNP446      | <i>Desi</i>      | Ca_Desig_Chr01               | 6322202                        | (G/T)       |



| <b>S.N.</b> | <b>SNP IDs</b> | <b>Cultivars</b> | <b>Chromosomes/scaffolds</b> | <b>Physical positions (bp)</b> | <b>SNPs</b> |
|-------------|----------------|------------------|------------------------------|--------------------------------|-------------|
| 24852       | CadSNP447      | <i>Desi</i>      | Ca_Desig_Chr01               | 6333247                        | (A/G)       |
| 24853       | CadSNP448      | <i>Desi</i>      | Ca_Desig_Chr01               | 6333238                        | (C/T)       |
| 24854       | CadSNP449      | <i>Desi</i>      | Ca_Desig_Chr01               | 6333418                        | (G/A)       |
| 24855       | CadSNP450      | <i>Desi</i>      | Ca_Desig_Chr01               | 6341237                        | (C/T)       |
| 24856       | CadSNP451      | <i>Desi</i>      | Ca_Desig_Chr01               | 6341213                        | (A/C)       |
| 24857       | CadSNP452      | <i>Desi</i>      | Ca_Desig_Chr01               | 6351975                        | (T/C)       |
| 24858       | CadSNP453      | <i>Desi</i>      | Ca_Desig_Chr01               | 6379951                        | (G/A)       |
| 24859       | CadSNP454      | <i>Desi</i>      | Ca_Desig_Chr01               | 6399918                        | (C/T)       |
| 24860       | CadSNP455      | <i>Desi</i>      | Ca_Desig_Chr01               | 6399989                        | (C/T)       |
| 24861       | CadSNP456      | <i>Desi</i>      | Ca_Desig_Chr01               | 6400007                        | (C/T)       |
| 24862       | CadSNP457      | <i>Desi</i>      | Ca_Desig_Chr01               | 6747779                        | (C/T)       |
| 24863       | CadSNP458      | <i>Desi</i>      | Ca_Desig_Chr01               | 6750146                        | (A/G)       |
| 24864       | CadSNP459      | <i>Desi</i>      | Ca_Desig_Chr01               | 6836227                        | (A/T)       |
| 24865       | CadSNP460      | <i>Desi</i>      | Ca_Desig_Chr01               | 6858906                        | (T/A)       |
| 24866       | CadSNP461      | <i>Desi</i>      | Ca_Desig_Chr01               | 6858922                        | (C/T)       |
| 24867       | CadSNP462      | <i>Desi</i>      | Ca_Desig_Chr01               | 6858925                        | (C/T)       |
| 24868       | CadSNP463      | <i>Desi</i>      | Ca_Desig_Chr01               | 6858952                        | (A/C)       |
| 24869       | CadSNP464      | <i>Desi</i>      | Ca_Desig_Chr01               | 6858964                        | (A/C)       |
| 24870       | CadSNP465      | <i>Desi</i>      | Ca_Desig_Chr01               | 6859408                        | (C/A)       |
| 24871       | CadSNP466      | <i>Desi</i>      | Ca_Desig_Chr01               | 6859661                        | (C/A)       |
| 24872       | CadSNP467      | <i>Desi</i>      | Ca_Desig_Chr01               | 6859634                        | (T/C)       |
| 24873       | CadSNP468      | <i>Desi</i>      | Ca_Desig_Chr01               | 6859628                        | (G/A)       |
| 24874       | CadSNP469      | <i>Desi</i>      | Ca_Desig_Chr01               | 6859622                        | (A/G)       |
| 24875       | CadSNP470      | <i>Desi</i>      | Ca_Desig_Chr01               | 6861332                        | (T/A)       |
| 24876       | CadSNP471      | <i>Desi</i>      | Ca_Desig_Chr01               | 6862834                        | (C/A)       |
| 24877       | CadSNP472      | <i>Desi</i>      | Ca_Desig_Chr01               | 6862836                        | (T/G)       |
| 24878       | CadSNP473      | <i>Desi</i>      | Ca_Desig_Chr01               | 6862866                        | (A/G)       |
| 24879       | CadSNP474      | <i>Desi</i>      | Ca_Desig_Chr01               | 6862869                        | (C/T)       |
| 24880       | CadSNP475      | <i>Desi</i>      | Ca_Desig_Chr01               | 6862872                        | (A/T)       |
| 24881       | CadSNP476      | <i>Desi</i>      | Ca_Desig_Chr01               | 6862873                        | (A/C)       |
| 24882       | CadSNP477      | <i>Desi</i>      | Ca_Desig_Chr01               | 6862881                        | (A/C)       |
| 24883       | CadSNP478      | <i>Desi</i>      | Ca_Desig_Chr01               | 6862888                        | (T/A)       |
| 24884       | CadSNP479      | <i>Desi</i>      | Ca_Desig_Chr01               | 6862889                        | (A/C)       |
| 24885       | CadSNP480      | <i>Desi</i>      | Ca_Desig_Chr01               | 6862893                        | (T/C)       |
| 24886       | CadSNP481      | <i>Desi</i>      | Ca_Desig_Chr01               | 7013189                        | (A/G)       |
| 24887       | CadSNP482      | <i>Desi</i>      | Ca_Desig_Chr01               | 7142598                        | (C/T)       |
| 24888       | CadSNP483      | <i>Desi</i>      | Ca_Desig_Chr01               | 7168613                        | (G/A)       |
| 24889       | CadSNP484      | <i>Desi</i>      | Ca_Desig_Chr01               | 7274246                        | (C/T)       |

| <b>S.N.</b> | <b>SNP IDs</b> | <b>Cultivars</b> | <b>Chromosomes/scaffolds</b> | <b>Physical positions (bp)</b> | <b>SNPs</b> |
|-------------|----------------|------------------|------------------------------|--------------------------------|-------------|
| 24890       | CadSNP485      | <i>Desi</i>      | Ca_Desig_Chr01               | 7279148                        | (G/A)       |
| 24891       | CadSNP486      | <i>Desi</i>      | Ca_Desig_Chr01               | 7279147                        | (G/A)       |
| 24892       | CadSNP487      | <i>Desi</i>      | Ca_Desig_Chr01               | 7279116                        | (G/A)       |
| 24893       | CadSNP488      | <i>Desi</i>      | Ca_Desig_Chr01               | 7279115                        | (T/C)       |
| 24894       | CadSNP489      | <i>Desi</i>      | Ca_Desig_Chr01               | 7279106                        | (G/T)       |
| 24895       | CadSNP490      | <i>Desi</i>      | Ca_Desig_Chr01               | 7279097                        | (G/A)       |
| 24896       | CadSNP491      | <i>Desi</i>      | Ca_Desig_Chr01               | 7289926                        | (G/A)       |
| 24897       | CadSNP492      | <i>Desi</i>      | Ca_Desig_Chr01               | 7289965                        | (G/A)       |
| 24898       | CadSNP493      | <i>Desi</i>      | Ca_Desig_Chr01               | 7331882                        | (T/C)       |
| 24899       | CadSNP494      | <i>Desi</i>      | Ca_Desig_Chr01               | 7331912                        | (C/G)       |
| 24900       | CadSNP495      | <i>Desi</i>      | Ca_Desig_Chr01               | 7331936                        | (C/T)       |
| 24901       | CadSNP496      | <i>Desi</i>      | Ca_Desig_Chr01               | 7331994                        | (G/A)       |
| 24902       | CadSNP497      | <i>Desi</i>      | Ca_Desig_Chr01               | 7331987                        | (C/T)       |
| 24903       | CadSNP498      | <i>Desi</i>      | Ca_Desig_Chr01               | 7383196                        | (A/C)       |
| 24904       | CadSNP499      | <i>Desi</i>      | Ca_Desig_Chr01               | 7383206                        | (A/G)       |
| 24905       | CadSNP500      | <i>Desi</i>      | Ca_Desig_Chr01               | 7383207                        | (G/A)       |
| 24906       | CadSNP501      | <i>Desi</i>      | Ca_Desig_Chr01               | 7383208                        | (T/A)       |
| 24907       | CadSNP502      | <i>Desi</i>      | Ca_Desig_Chr01               | 7383224                        | (A/G)       |
| 24908       | CadSNP503      | <i>Desi</i>      | Ca_Desig_Chr01               | 7383225                        | (G/A)       |
| 24909       | CadSNP504      | <i>Desi</i>      | Ca_Desig_Chr01               | 7383226                        | (C/A)       |
| 24910       | CadSNP505      | <i>Desi</i>      | Ca_Desig_Chr01               | 7383229                        | (G/A)       |
| 24911       | CadSNP506      | <i>Desi</i>      | Ca_Desig_Chr01               | 7383232                        | (G/A)       |
| 24912       | CadSNP507      | <i>Desi</i>      | Ca_Desig_Chr01               | 7383255                        | (A/G)       |
| 24913       | CadSNP508      | <i>Desi</i>      | Ca_Desig_Chr01               | 7383256                        | (G/A)       |
| 24914       | CadSNP509      | <i>Desi</i>      | Ca_Desig_Chr01               | 7383259                        | (G/A)       |
| 24915       | CadSNP510      | <i>Desi</i>      | Ca_Desig_Chr01               | 7383265                        | (T/G)       |
| 24916       | CadSNP511      | <i>Desi</i>      | Ca_Desig_Chr01               | 7383271                        | (A/G)       |
| 24917       | CadSNP512      | <i>Desi</i>      | Ca_Desig_Chr01               | 7383274                        | (C/T)       |
| 24918       | CadSNP513      | <i>Desi</i>      | Ca_Desig_Chr01               | 7383281                        | (G/A)       |
| 24919       | CadSNP514      | <i>Desi</i>      | Ca_Desig_Chr01               | 7383437                        | (T/C)       |
| 24920       | CadSNP515      | <i>Desi</i>      | Ca_Desig_Chr01               | 7383436                        | (G/A)       |
| 24921       | CadSNP516      | <i>Desi</i>      | Ca_Desig_Chr01               | 7383433                        | (T/A)       |
| 24922       | CadSNP517      | <i>Desi</i>      | Ca_Desig_Chr01               | 7383406                        | (C/T)       |
| 24923       | CadSNP518      | <i>Desi</i>      | Ca_Desig_Chr01               | 7383808                        | (A/T)       |
| 24924       | CadSNP519      | <i>Desi</i>      | Ca_Desig_Chr01               | 7436170                        | (T/A)       |
| 24925       | CadSNP520      | <i>Desi</i>      | Ca_Desig_Chr01               | 7436190                        | (T/G)       |
| 24926       | CadSNP521      | <i>Desi</i>      | Ca_Desig_Chr01               | 7436196                        | (G/A)       |
| 24927       | CadSNP522      | <i>Desi</i>      | Ca_Desig_Chr01               | 7436205                        | (T/G)       |

| <b>S.N.</b> | <b>SNP IDs</b> | <b>Cultivars</b> | <b>Chromosomes/scaffolds</b> | <b>Physical positions (bp)</b> | <b>SNPs</b> |
|-------------|----------------|------------------|------------------------------|--------------------------------|-------------|
| 24928       | CadSNP523      | <i>Desi</i>      | Ca_Desig_Chr01               | 7448000                        | (C/G)       |
| 24929       | CadSNP524      | <i>Desi</i>      | Ca_Desig_Chr01               | 7489519                        | (T/A)       |
| 24930       | CadSNP525      | <i>Desi</i>      | Ca_Desig_Chr01               | 7489492                        | (T/A)       |
| 24931       | CadSNP526      | <i>Desi</i>      | Ca_Desig_Chr01               | 7489471                        | (T/A)       |
| 24932       | CadSNP527      | <i>Desi</i>      | Ca_Desig_Chr01               | 7489452                        | (T/G)       |
| 24933       | CadSNP528      | <i>Desi</i>      | Ca_Desig_Chr01               | 7489451                        | (A/T)       |
| 24934       | CadSNP529      | <i>Desi</i>      | Ca_Desig_Chr01               | 7489447                        | (C/A)       |
| 24935       | CadSNP530      | <i>Desi</i>      | Ca_Desig_Chr01               | 7606885                        | (C/G)       |
| 24936       | CadSNP531      | <i>Desi</i>      | Ca_Desig_Chr01               | 7606933                        | (C/T)       |
| 24937       | CadSNP532      | <i>Desi</i>      | Ca_Desig_Chr01               | 7632307                        | (A/G)       |
| 24938       | CadSNP533      | <i>Desi</i>      | Ca_Desig_Chr01               | 7632356                        | (C/T)       |
| 24939       | CadSNP534      | <i>Desi</i>      | Ca_Desig_Chr01               | 7668717                        | (G/A)       |
| 24940       | CadSNP535      | <i>Desi</i>      | Ca_Desig_Chr01               | 7669506                        | (G/C)       |
| 24941       | CadSNP536      | <i>Desi</i>      | Ca_Desig_Chr01               | 7669603                        | (G/C)       |
| 24942       | CadSNP537      | <i>Desi</i>      | Ca_Desig_Chr01               | 7671799                        | (A/G)       |
| 24943       | CadSNP538      | <i>Desi</i>      | Ca_Desig_Chr01               | 7671815                        | (G/A)       |
| 24944       | CadSNP539      | <i>Desi</i>      | Ca_Desig_Chr01               | 7671819                        | (T/C)       |
| 24945       | CadSNP540      | <i>Desi</i>      | Ca_Desig_Chr01               | 7671842                        | (A/T)       |
| 24946       | CadSNP541      | <i>Desi</i>      | Ca_Desig_Chr01               | 7671878                        | (T/G)       |
| 24947       | CadSNP542      | <i>Desi</i>      | Ca_Desig_Chr01               | 7671931                        | (C/A)       |
| 24948       | CadSNP543      | <i>Desi</i>      | Ca_Desig_Chr01               | 7671947                        | (C/T)       |
| 24949       | CadSNP544      | <i>Desi</i>      | Ca_Desig_Chr01               | 7671963                        | (C/T)       |
| 24950       | CadSNP545      | <i>Desi</i>      | Ca_Desig_Chr01               | 7676039                        | (G/C)       |
| 24951       | CadSNP546      | <i>Desi</i>      | Ca_Desig_Chr01               | 7680425                        | (A/G)       |
| 24952       | CadSNP547      | <i>Desi</i>      | Ca_Desig_Chr01               | 7680457                        | (C/T)       |
| 24953       | CadSNP548      | <i>Desi</i>      | Ca_Desig_Chr01               | 7680543                        | (C/T)       |
| 24954       | CadSNP549      | <i>Desi</i>      | Ca_Desig_Chr01               | 7712801                        | (A/C)       |
| 24955       | CadSNP550      | <i>Desi</i>      | Ca_Desig_Chr01               | 7712821                        | (C/T)       |
| 24956       | CadSNP551      | <i>Desi</i>      | Ca_Desig_Chr01               | 7956977                        | (T/G)       |
| 24957       | CadSNP552      | <i>Desi</i>      | Ca_Desig_Chr01               | 7957053                        | (G/A)       |
| 24958       | CadSNP553      | <i>Desi</i>      | Ca_Desig_Chr01               | 8163297                        | (C/A)       |
| 24959       | CadSNP554      | <i>Desi</i>      | Ca_Desig_Chr01               | 8173005                        | (T/C)       |
| 24960       | CadSNP555      | <i>Desi</i>      | Ca_Desig_Chr01               | 8219717                        | (A/G)       |
| 24961       | CadSNP556      | <i>Desi</i>      | Ca_Desig_Chr01               | 8220943                        | (G/A)       |
| 24962       | CadSNP557      | <i>Desi</i>      | Ca_Desig_Chr01               | 8220952                        | (C/T)       |
| 24963       | CadSNP558      | <i>Desi</i>      | Ca_Desig_Chr01               | 8221152                        | (G/A)       |
| 24964       | CadSNP559      | <i>Desi</i>      | Ca_Desig_Chr01               | 8279866                        | (T/G)       |
| 24965       | CadSNP560      | <i>Desi</i>      | Ca_Desig_Chr01               | 8280837                        | (C/A)       |

| <b>S.N.</b> | <b>SNP IDs</b> | <b>Cultivars</b> | <b>Chromosomes/scaffolds</b> | <b>Physical positions (bp)</b> | <b>SNPs</b> |
|-------------|----------------|------------------|------------------------------|--------------------------------|-------------|
| 24966       | CadSNP561      | <i>Desi</i>      | Ca_Desig_Chr01               | 8280838                        | (C/G)       |
| 24967       | CadSNP562      | <i>Desi</i>      | Ca_Desig_Chr01               | 8297933                        | (A/G)       |
| 24968       | CadSNP563      | <i>Desi</i>      | Ca_Desig_Chr01               | 8365636                        | (A/C)       |
| 24969       | CadSNP564      | <i>Desi</i>      | Ca_Desig_Chr01               | 8390528                        | (C/T)       |
| 24970       | CadSNP565      | <i>Desi</i>      | Ca_Desig_Chr01               | 8397872                        | (C/T)       |
| 24971       | CadSNP566      | <i>Desi</i>      | Ca_Desig_Chr01               | 8398204                        | (G/T)       |
| 24972       | CadSNP567      | <i>Desi</i>      | Ca_Desig_Chr01               | 8416775                        | (G/A)       |
| 24973       | CadSNP568      | <i>Desi</i>      | Ca_Desig_Chr01               | 8422096                        | (G/T)       |
| 24974       | CadSNP569      | <i>Desi</i>      | Ca_Desig_Chr01               | 8422113                        | (G/T)       |
| 24975       | CadSNP570      | <i>Desi</i>      | Ca_Desig_Chr01               | 8426569                        | (G/A)       |
| 24976       | CadSNP571      | <i>Desi</i>      | Ca_Desig_Chr01               | 8492439                        | (T/A)       |
| 24977       | CadSNP572      | <i>Desi</i>      | Ca_Desig_Chr01               | 8492480                        | (A/T)       |
| 24978       | CadSNP573      | <i>Desi</i>      | Ca_Desig_Chr01               | 8492496                        | (A/T)       |
| 24979       | CadSNP574      | <i>Desi</i>      | Ca_Desig_Chr01               | 8492493                        | (A/C)       |
| 24980       | CadSNP575      | <i>Desi</i>      | Ca_Desig_Chr01               | 8492492                        | (A/G)       |
| 24981       | CadSNP576      | <i>Desi</i>      | Ca_Desig_Chr01               | 8506952                        | (G/A)       |
| 24982       | CadSNP577      | <i>Desi</i>      | Ca_Desig_Chr01               | 8506982                        | (A/G)       |
| 24983       | CadSNP578      | <i>Desi</i>      | Ca_Desig_Chr01               | 8561851                        | (G/A)       |
| 24984       | CadSNP579      | <i>Desi</i>      | Ca_Desig_Chr01               | 8689520                        | (A/C)       |
| 24985       | CadSNP580      | <i>Desi</i>      | Ca_Desig_Chr01               | 8689473                        | (C/T)       |
| 24986       | CadSNP581      | <i>Desi</i>      | Ca_Desig_Chr01               | 8725597                        | (G/A)       |
| 24987       | CadSNP582      | <i>Desi</i>      | Ca_Desig_Chr01               | 8725599                        | (C/A)       |
| 24988       | CadSNP583      | <i>Desi</i>      | Ca_Desig_Chr01               | 8725654                        | (A/T)       |
| 24989       | CadSNP584      | <i>Desi</i>      | Ca_Desig_Chr01               | 8772201                        | (A/G)       |
| 24990       | CadSNP585      | <i>Desi</i>      | Ca_Desig_Chr01               | 8786857                        | (C/A)       |
| 24991       | CadSNP586      | <i>Desi</i>      | Ca_Desig_Chr01               | 8871945                        | (C/T)       |
| 24992       | CadSNP587      | <i>Desi</i>      | Ca_Desig_Chr01               | 8902125                        | (C/A)       |
| 24993       | CadSNP588      | <i>Desi</i>      | Ca_Desig_Chr01               | 8952943                        | (A/G)       |
| 24994       | CadSNP589      | <i>Desi</i>      | Ca_Desig_Chr01               | 8988064                        | (G/A)       |
| 24995       | CadSNP590      | <i>Desi</i>      | Ca_Desig_Chr01               | 8988049                        | (G/A)       |
| 24996       | CadSNP591      | <i>Desi</i>      | Ca_Desig_Chr01               | 9014610                        | (C/A)       |
| 24997       | CadSNP592      | <i>Desi</i>      | Ca_Desig_Chr01               | 9022986                        | (G/A)       |
| 24998       | CadSNP593      | <i>Desi</i>      | Ca_Desig_Chr01               | 9023240                        | (T/C)       |
| 24999       | CadSNP594      | <i>Desi</i>      | Ca_Desig_Chr01               | 9023290                        | (G/A)       |
| 25000       | CadSNP595      | <i>Desi</i>      | Ca_Desig_Chr01               | 9033783                        | (T/C)       |
| 25001       | CadSNP596      | <i>Desi</i>      | Ca_Desig_Chr01               | 9089686                        | (T/C)       |
| 25002       | CadSNP597      | <i>Desi</i>      | Ca_Desig_Chr01               | 9193835                        | (G/A)       |
| 25003       | CadSNP598      | <i>Desi</i>      | Ca_Desig_Chr01               | 9217460                        | (C/T)       |

| <b>S.N.</b> | <b>SNP IDs</b> | <b>Cultivars</b> | <b>Chromosomes/scaffolds</b> | <b>Physical positions (bp)</b> | <b>SNPs</b> |
|-------------|----------------|------------------|------------------------------|--------------------------------|-------------|
| 25004       | CadSNP599      | <i>Desi</i>      | Ca_Desig_Chr01               | 9217685                        | (A/G)       |
| 25005       | CadSNP600      | <i>Desi</i>      | Ca_Desig_Chr01               | 9217840                        | (G/T)       |
| 25006       | CadSNP601      | <i>Desi</i>      | Ca_Desig_Chr01               | 9218827                        | (T/G)       |
| 25007       | CadSNP602      | <i>Desi</i>      | Ca_Desig_Chr01               | 9218838                        | (A/C)       |
| 25008       | CadSNP603      | <i>Desi</i>      | Ca_Desig_Chr01               | 9218853                        | (G/A)       |
| 25009       | CadSNP604      | <i>Desi</i>      | Ca_Desig_Chr01               | 9218890                        | (C/A)       |
| 25010       | CadSNP605      | <i>Desi</i>      | Ca_Desig_Chr01               | 9298126                        | (T/G)       |
| 25011       | CadSNP606      | <i>Desi</i>      | Ca_Desig_Chr01               | 9298398                        | (A/G)       |
| 25012       | CadSNP607      | <i>Desi</i>      | Ca_Desig_Chr01               | 9306517                        | (A/C)       |
| 25013       | CadSNP608      | <i>Desi</i>      | Ca_Desig_Chr01               | 9308560                        | (T/C)       |
| 25014       | CadSNP609      | <i>Desi</i>      | Ca_Desig_Chr01               | 9308653                        | (C/T)       |
| 25015       | CadSNP610      | <i>Desi</i>      | Ca_Desig_Chr01               | 9354522                        | (G/A)       |
| 25016       | CadSNP611      | <i>Desi</i>      | Ca_Desig_Chr01               | 9354518                        | (T/G)       |
| 25017       | CadSNP612      | <i>Desi</i>      | Ca_Desig_Chr01               | 9361145                        | (G/T)       |
| 25018       | CadSNP613      | <i>Desi</i>      | Ca_Desig_Chr01               | 9362408                        | (G/A)       |
| 25019       | CadSNP614      | <i>Desi</i>      | Ca_Desig_Chr01               | 9761124                        | (A/G)       |
| 25020       | CadSNP615      | <i>Desi</i>      | Ca_Desig_Chr01               | 9761183                        | (A/G)       |
| 25021       | CadSNP616      | <i>Desi</i>      | Ca_Desig_Chr01               | 9761192                        | (T/G)       |
| 25022       | CadSNP617      | <i>Desi</i>      | Ca_Desig_Chr01               | 9761256                        | (T/C)       |
| 25023       | CadSNP618      | <i>Desi</i>      | Ca_Desig_Chr01               | 10000773                       | (T/C)       |
| 25024       | CadSNP619      | <i>Desi</i>      | Ca_Desig_Chr01               | 10002060                       | (A/C)       |
| 25025       | CadSNP620      | <i>Desi</i>      | Ca_Desig_Chr01               | 10012819                       | (T/C)       |
| 25026       | CadSNP621      | <i>Desi</i>      | Ca_Desig_Chr01               | 10012821                       | (G/A)       |
| 25027       | CadSNP622      | <i>Desi</i>      | Ca_Desig_Chr01               | 10039308                       | (T/A)       |
| 25028       | CadSNP623      | <i>Desi</i>      | Ca_Desig_Chr01               | 10078804                       | (A/G)       |
| 25029       | CadSNP624      | <i>Desi</i>      | Ca_Desig_Chr01               | 10106781                       | (G/C)       |
| 25030       | CadSNP625      | <i>Desi</i>      | Ca_Desig_Chr01               | 10311695                       | (T/C)       |
| 25031       | CadSNP626      | <i>Desi</i>      | Ca_Desig_Chr01               | 10322769                       | (C/T)       |
| 25032       | CadSNP627      | <i>Desi</i>      | Ca_Desig_Chr01               | 10331572                       | (A/G)       |
| 25033       | CadSNP628      | <i>Desi</i>      | Ca_Desig_Chr01               | 10331598                       | (G/A)       |
| 25034       | CadSNP629      | <i>Desi</i>      | Ca_Desig_Chr01               | 10371032                       | (G/A)       |
| 25035       | CadSNP630      | <i>Desi</i>      | Ca_Desig_Chr01               | 10441613                       | (G/A)       |
| 25036       | CadSNP631      | <i>Desi</i>      | Ca_Desig_Chr01               | 10441719                       | (A/G)       |
| 25037       | CadSNP632      | <i>Desi</i>      | Ca_Desig_Chr01               | 10441699                       | (G/A)       |
| 25038       | CadSNP633      | <i>Desi</i>      | Ca_Desig_Chr01               | 10441697                       | (A/C)       |
| 25039       | CadSNP634      | <i>Desi</i>      | Ca_Desig_Chr01               | 10441800                       | (C/A)       |
| 25040       | CadSNP635      | <i>Desi</i>      | Ca_Desig_Chr01               | 10441806                       | (C/A)       |
| 25041       | CadSNP636      | <i>Desi</i>      | Ca_Desig_Chr01               | 10441837                       | (G/A)       |

| <b>S.N.</b> | <b>SNP IDs</b> | <b>Cultivars</b> | <b>Chromosomes/scaffolds</b> | <b>Physical positions (bp)</b> | <b>SNPs</b> |
|-------------|----------------|------------------|------------------------------|--------------------------------|-------------|
| 25042       | CadSNP637      | <i>Desi</i>      | Ca_Desig_Chr01               | 10474199                       | (G/A)       |
| 25043       | CadSNP638      | <i>Desi</i>      | Ca_Desig_Chr01               | 10530999                       | (T/C)       |
| 25044       | CadSNP639      | <i>Desi</i>      | Ca_Desig_Chr01               | 10608390                       | (A/T)       |
| 25045       | CadSNP640      | <i>Desi</i>      | Ca_Desig_Chr01               | 10707824                       | (G/T)       |
| 25046       | CadSNP641      | <i>Desi</i>      | Ca_Desig_Chr01               | 10719893                       | (T/G)       |
| 25047       | CadSNP642      | <i>Desi</i>      | Ca_Desig_Chr01               | 10719894                       | (T/A)       |
| 25048       | CadSNP643      | <i>Desi</i>      | Ca_Desig_Chr01               | 10720003                       | (A/T)       |
| 25049       | CadSNP644      | <i>Desi</i>      | Ca_Desig_Chr01               | 10723301                       | (C/T)       |
| 25050       | CadSNP645      | <i>Desi</i>      | Ca_Desig_Chr01               | 10741069                       | (G/C)       |
| 25051       | CadSNP646      | <i>Desi</i>      | Ca_Desig_Chr01               | 10741089                       | (A/G)       |
| 25052       | CadSNP647      | <i>Desi</i>      | Ca_Desig_Chr01               | 10754555                       | (C/G)       |
| 25053       | CadSNP648      | <i>Desi</i>      | Ca_Desig_Chr01               | 10763266                       | (T/C)       |
| 25054       | CadSNP649      | <i>Desi</i>      | Ca_Desig_Chr01               | 10827427                       | (C/T)       |
| 25055       | CadSNP650      | <i>Desi</i>      | Ca_Desig_Chr01               | 10876770                       | (A/G)       |
| 25056       | CadSNP651      | <i>Desi</i>      | Ca_Desig_Chr01               | 10876828                       | (C/A)       |
| 25057       | CadSNP652      | <i>Desi</i>      | Ca_Desig_Chr01               | 10943212                       | (T/C)       |
| 25058       | CadSNP653      | <i>Desi</i>      | Ca_Desig_Chr01               | 10972557                       | (C/T)       |
| 25059       | CadSNP654      | <i>Desi</i>      | Ca_Desig_Chr01               | 10972556                       | (G/A)       |
| 25060       | CadSNP655      | <i>Desi</i>      | Ca_Desig_Chr01               | 11104634                       | (G/T)       |
| 25061       | CadSNP656      | <i>Desi</i>      | Ca_Desig_Chr01               | 11104890                       | (C/T)       |
| 25062       | CadSNP657      | <i>Desi</i>      | Ca_Desig_Chr01               | 11106063                       | (A/T)       |
| 25063       | CadSNP658      | <i>Desi</i>      | Ca_Desig_Chr01               | 11106278                       | (C/T)       |
| 25064       | CadSNP659      | <i>Desi</i>      | Ca_Desig_Chr01               | 11109156                       | (G/C)       |
| 25065       | CadSNP660      | <i>Desi</i>      | Ca_Desig_Chr01               | 11109187                       | (A/T)       |
| 25066       | CadSNP661      | <i>Desi</i>      | Ca_Desig_Chr01               | 11140259                       | (G/T)       |
| 25067       | CadSNP662      | <i>Desi</i>      | Ca_Desig_Chr01               | 11140249                       | (A/C)       |
| 25068       | CadSNP663      | <i>Desi</i>      | Ca_Desig_Chr01               | 11140319                       | (A/T)       |
| 25069       | CadSNP664      | <i>Desi</i>      | Ca_Desig_Chr01               | 11140333                       | (G/A)       |
| 25070       | CadSNP665      | <i>Desi</i>      | Ca_Desig_Chr01               | 11153637                       | (G/T)       |
| 25071       | CadSNP666      | <i>Desi</i>      | Ca_Desig_Chr01               | 11188515                       | (T/C)       |
| 25072       | CadSNP667      | <i>Desi</i>      | Ca_Desig_Chr01               | 11188519                       | (A/G)       |
| 25073       | CadSNP668      | <i>Desi</i>      | Ca_Desig_Chr01               | 11203214                       | (A/G)       |
| 25074       | CadSNP669      | <i>Desi</i>      | Ca_Desig_Chr01               | 11242051                       | (C/A)       |
| 25075       | CadSNP670      | <i>Desi</i>      | Ca_Desig_Chr01               | 11242086                       | (A/T)       |
| 25076       | CadSNP671      | <i>Desi</i>      | Ca_Desig_Chr01               | 11242117                       | (C/T)       |
| 25077       | CadSNP672      | <i>Desi</i>      | Ca_Desig_Chr01               | 11255650                       | (A/C)       |
| 25078       | CadSNP673      | <i>Desi</i>      | Ca_Desig_Chr01               | 11255645                       | (A/C)       |
| 25079       | CadSNP674      | <i>Desi</i>      | Ca_Desig_Chr01               | 11258827                       | (A/T)       |

| <b>S.N.</b> | <b>SNP IDs</b> | <b>Cultivars</b> | <b>Chromosomes/scaffolds</b> | <b>Physical positions (bp)</b> | <b>SNPs</b> |
|-------------|----------------|------------------|------------------------------|--------------------------------|-------------|
| 25080       | CadSNP675      | <i>Desi</i>      | Ca_Desig_Chr01               | 11302818                       | (G/A)       |
| 25081       | CadSNP676      | <i>Desi</i>      | Ca_Desig_Chr01               | 11302861                       | (G/A)       |
| 25082       | CadSNP677      | <i>Desi</i>      | Ca_Desig_Chr01               | 11302870                       | (A/G)       |
| 25083       | CadSNP678      | <i>Desi</i>      | Ca_Desig_Chr01               | 11305587                       | (T/G)       |
| 25084       | CadSNP679      | <i>Desi</i>      | Ca_Desig_Chr01               | 11368294                       | (C/A)       |
| 25085       | CadSNP680      | <i>Desi</i>      | Ca_Desig_Chr01               | 11411238                       | (A/G)       |
| 25086       | CadSNP681      | <i>Desi</i>      | Ca_Desig_Chr01               | 11411433                       | (G/C)       |
| 25087       | CadSNP682      | <i>Desi</i>      | Ca_Desig_Chr01               | 11447597                       | (C/T)       |
| 25088       | CadSNP683      | <i>Desi</i>      | Ca_Desig_Chr01               | 11447611                       | (C/T)       |
| 25089       | CadSNP684      | <i>Desi</i>      | Ca_Desig_Chr01               | 11447639                       | (T/C)       |
| 25090       | CadSNP685      | <i>Desi</i>      | Ca_Desig_Chr01               | 11447647                       | (C/T)       |
| 25091       | CadSNP686      | <i>Desi</i>      | Ca_Desig_Chr01               | 11447673                       | (T/C)       |
| 25092       | CadSNP687      | <i>Desi</i>      | Ca_Desig_Chr01               | 11470235                       | (A/G)       |
| 25093       | CadSNP688      | <i>Desi</i>      | Ca_Desig_Chr01               | 11479650                       | (A/T)       |
| 25094       | CadSNP689      | <i>Desi</i>      | Ca_Desig_Chr01               | 11520563                       | (T/A)       |
| 25095       | CadSNP690      | <i>Desi</i>      | Ca_Desig_Chr01               | 11520595                       | (T/C)       |
| 25096       | CadSNP691      | <i>Desi</i>      | Ca_Desig_Chr01               | 11568882                       | (C/T)       |
| 25097       | CadSNP692      | <i>Desi</i>      | Ca_Desig_Chr01               | 11569800                       | (A/G)       |
| 25098       | CadSNP693      | <i>Desi</i>      | Ca_Desig_Chr01               | 11569811                       | (A/C)       |
| 25099       | CadSNP694      | <i>Desi</i>      | Ca_Desig_Chr01               | 11586934                       | (G/T)       |
| 25100       | CadSNP695      | <i>Desi</i>      | Ca_Desig_Chr01               | 11588193                       | (C/T)       |
| 25101       | CadSNP696      | <i>Desi</i>      | Ca_Desig_Chr01               | 11588259                       | (G/A)       |
| 25102       | CadSNP697      | <i>Desi</i>      | Ca_Desig_Chr01               | 11900706                       | (G/C)       |
| 25103       | CadSNP698      | <i>Desi</i>      | Ca_Desig_Chr01               | 11906460                       | (A/C)       |
| 25104       | CadSNP699      | <i>Desi</i>      | Ca_Desig_Chr01               | 11909644                       | (A/C)       |
| 25105       | CadSNP700      | <i>Desi</i>      | Ca_Desig_Chr01               | 12045526                       | (G/A)       |
| 25106       | CadSNP701      | <i>Desi</i>      | Ca_Desig_Chr01               | 12155983                       | (T/G)       |
| 25107       | CadSNP702      | <i>Desi</i>      | Ca_Desig_Chr01               | 12159674                       | (A/C)       |
| 25108       | CadSNP703      | <i>Desi</i>      | Ca_Desig_Chr01               | 12163294                       | (C/A)       |
| 25109       | CadSNP704      | <i>Desi</i>      | Ca_Desig_Chr01               | 12171484                       | (A/G)       |
| 25110       | CadSNP705      | <i>Desi</i>      | Ca_Desig_Chr01               | 12171505                       | (T/C)       |
| 25111       | CadSNP706      | <i>Desi</i>      | Ca_Desig_Chr01               | 12191974                       | (C/T)       |
| 25112       | CadSNP707      | <i>Desi</i>      | Ca_Desig_Chr01               | 12192017                       | (G/C)       |
| 25113       | CadSNP708      | <i>Desi</i>      | Ca_Desig_Chr01               | 12192106                       | (A/C)       |
| 25114       | CadSNP709      | <i>Desi</i>      | Ca_Desig_Chr01               | 12192068                       | (C/G)       |
| 25115       | CadSNP710      | <i>Desi</i>      | Ca_Desig_Chr01               | 13563876                       | (T/G)       |
| 25116       | CadSNP711      | <i>Desi</i>      | Ca_Desig_Chr01               | 13585102                       | (C/G)       |
| 25117       | CadSNP712      | <i>Desi</i>      | Ca_Desig_Chr01               | 13585162                       | (T/A)       |

| <b>S.N.</b> | <b>SNP IDs</b> | <b>Cultivars</b> | <b>Chromosomes/scaffolds</b> | <b>Physical positions (bp)</b> | <b>SNPs</b> |
|-------------|----------------|------------------|------------------------------|--------------------------------|-------------|
| 25118       | CadSNP713      | <i>Desi</i>      | Ca_Desig_Chr01               | 13590335                       | (A/G)       |
| 25119       | CadSNP714      | <i>Desi</i>      | Ca_Desig_Chr01               | 13602425                       | (C/A)       |
| 25120       | CadSNP715      | <i>Desi</i>      | Ca_Desig_Chr01               | 13620048                       | (C/T)       |
| 25121       | CadSNP716      | <i>Desi</i>      | Ca_Desig_Chr01               | 13641367                       | (C/T)       |
| 25122       | CadSNP717      | <i>Desi</i>      | Ca_Desig_Chr01               | 13661302                       | (A/G)       |
| 25123       | CadSNP718      | <i>Desi</i>      | Ca_Desig_Chr01               | 13661337                       | (G/A)       |
| 25124       | CadSNP719      | <i>Desi</i>      | Ca_Desig_Chr01               | 13690923                       | (G/A)       |
| 25125       | CadSNP720      | <i>Desi</i>      | Ca_Desig_Chr01               | 13737053                       | (G/A)       |
| 25126       | CadSNP721      | <i>Desi</i>      | Ca_Desig_Chr01               | 13748421                       | (C/G)       |
| 25127       | CadSNP722      | <i>Desi</i>      | Ca_Desig_Chr01               | 13766314                       | (G/A)       |
| 25128       | CadSNP723      | <i>Desi</i>      | Ca_Desig_Chr01               | 13798808                       | (A/T)       |
| 25129       | CadSNP724      | <i>Desi</i>      | Ca_Desig_Chr01               | 13834782                       | (G/C)       |
| 25130       | CadSNP725      | <i>Desi</i>      | Ca_Desig_Chr01               | 13843833                       | (C/T)       |
| 25131       | CadSNP726      | <i>Desi</i>      | Ca_Desig_Chr01               | 13843906                       | (G/A)       |
| 25132       | CadSNP727      | <i>Desi</i>      | Ca_Desig_Chr01               | 13843980                       | (C/A)       |
| 25133       | CadSNP728      | <i>Desi</i>      | Ca_Desig_Chr01               | 13843964                       | (C/G)       |
| 25134       | CadSNP729      | <i>Desi</i>      | Ca_Desig_Chr01               | 13843940                       | (C/T)       |
| 25135       | CadSNP730      | <i>Desi</i>      | Ca_Desig_Chr01               | 13844080                       | (C/T)       |
| 25136       | CadSNP731      | <i>Desi</i>      | Ca_Desig_Chr01               | 13844081                       | (A/T)       |
| 25137       | CadSNP732      | <i>Desi</i>      | Ca_Desig_Chr01               | 13844082                       | (A/C)       |
| 25138       | CadSNP733      | <i>Desi</i>      | Ca_Desig_Chr01               | 13844150                       | (G/C)       |
| 25139       | CadSNP734      | <i>Desi</i>      | Ca_Desig_Chr01               | 13852748                       | (A/G)       |
| 25140       | CadSNP735      | <i>Desi</i>      | Ca_Desig_Chr01               | 13852733                       | (G/A)       |
| 25141       | CadSNP736      | <i>Desi</i>      | Ca_Desig_Chr01               | 13852713                       | (C/T)       |
| 25142       | CadSNP737      | <i>Desi</i>      | Ca_Desig_Chr01               | 13853257                       | (T/C)       |
| 25143       | CadSNP738      | <i>Desi</i>      | Ca_Desig_Chr01               | 13853344                       | (T/C)       |
| 25144       | CadSNP739      | <i>Desi</i>      | Ca_Desig_Chr01               | 13864949                       | (G/A)       |
| 25145       | CadSNP740      | <i>Desi</i>      | Ca_Desig_Chr01               | 13927517                       | (T/C)       |
| 25146       | CadSNP741      | <i>Desi</i>      | Ca_Desig_Chr01               | 13927520                       | (T/C)       |
| 25147       | CadSNP742      | <i>Desi</i>      | Ca_Desig_Chr01               | 13927698                       | (T/G)       |
| 25148       | CadSNP743      | <i>Desi</i>      | Ca_Desig_Chr01               | 13934729                       | (G/T)       |
| 25149       | CadSNP744      | <i>Desi</i>      | Ca_Desig_Chr01               | 13935583                       | (G/A)       |
| 25150       | CadSNP745      | <i>Desi</i>      | Ca_Desig_Chr01               | 13969163                       | (T/G)       |
| 25151       | CadSNP746      | <i>Desi</i>      | Ca_Desig_Chr01               | 13969143                       | (A/C)       |
| 25152       | CadSNP747      | <i>Desi</i>      | Ca_Desig_Chr01               | 14093206                       | (T/A)       |
| 25153       | CadSNP748      | <i>Desi</i>      | Ca_Desig_Chr01               | 14113511                       | (G/C)       |
| 25154       | CadSNP749      | <i>Desi</i>      | Ca_Desig_Chr01               | 14113485                       | (A/G)       |
| 25155       | CadSNP750      | <i>Desi</i>      | Ca_Desig_Chr01               | 14113598                       | (C/T)       |



| <b>S.N.</b> | <b>SNP IDs</b> | <b>Cultivars</b> | <b>Chromosomes/scaffolds</b> | <b>Physical positions (bp)</b> | <b>SNPs</b> |
|-------------|----------------|------------------|------------------------------|--------------------------------|-------------|
| 25156       | CadSNP751      | <i>Desi</i>      | Ca_Desig_Chr01               | 14114903                       | (A/C)       |
| 25157       | CadSNP752      | <i>Desi</i>      | Ca_Desig_Chr01               | 14128326                       | (T/G)       |
| 25158       | CadSNP753      | <i>Desi</i>      | Ca_Desig_Chr01               | 14161553                       | (G/T)       |
| 25159       | CadSNP754      | <i>Desi</i>      | Ca_Desig_Chr02               | 16503                          | (A/C)       |
| 25160       | CadSNP755      | <i>Desi</i>      | Ca_Desig_Chr02               | 16504                          | (G/A)       |
| 25161       | CadSNP756      | <i>Desi</i>      | Ca_Desig_Chr02               | 82708                          | (C/G)       |
| 25162       | CadSNP757      | <i>Desi</i>      | Ca_Desig_Chr02               | 179194                         | (C/G)       |
| 25163       | CadSNP758      | <i>Desi</i>      | Ca_Desig_Chr02               | 179173                         | (G/T)       |
| 25164       | CadSNP759      | <i>Desi</i>      | Ca_Desig_Chr02               | 179260                         | (T/A)       |
| 25165       | CadSNP760      | <i>Desi</i>      | Ca_Desig_Chr02               | 187800                         | (A/G)       |
| 25166       | CadSNP761      | <i>Desi</i>      | Ca_Desig_Chr02               | 201869                         | (T/C)       |
| 25167       | CadSNP762      | <i>Desi</i>      | Ca_Desig_Chr02               | 205617                         | (C/T)       |
| 25168       | CadSNP763      | <i>Desi</i>      | Ca_Desig_Chr02               | 281905                         | (T/C)       |
| 25169       | CadSNP764      | <i>Desi</i>      | Ca_Desig_Chr02               | 303118                         | (C/G)       |
| 25170       | CadSNP765      | <i>Desi</i>      | Ca_Desig_Chr02               | 303138                         | (A/G)       |
| 25171       | CadSNP766      | <i>Desi</i>      | Ca_Desig_Chr02               | 318397                         | (A/C)       |
| 25172       | CadSNP767      | <i>Desi</i>      | Ca_Desig_Chr02               | 318414                         | (A/G)       |
| 25173       | CadSNP768      | <i>Desi</i>      | Ca_Desig_Chr02               | 328850                         | (G/A)       |
| 25174       | CadSNP769      | <i>Desi</i>      | Ca_Desig_Chr02               | 328828                         | (C/T)       |
| 25175       | CadSNP770      | <i>Desi</i>      | Ca_Desig_Chr02               | 398016                         | (C/T)       |
| 25176       | CadSNP771      | <i>Desi</i>      | Ca_Desig_Chr02               | 429417                         | (T/C)       |
| 25177       | CadSNP772      | <i>Desi</i>      | Ca_Desig_Chr02               | 440499                         | (C/G)       |
| 25178       | CadSNP773      | <i>Desi</i>      | Ca_Desig_Chr02               | 440520                         | (G/A)       |
| 25179       | CadSNP774      | <i>Desi</i>      | Ca_Desig_Chr02               | 440592                         | (A/T)       |
| 25180       | CadSNP775      | <i>Desi</i>      | Ca_Desig_Chr02               | 440595                         | (T/C)       |
| 25181       | CadSNP776      | <i>Desi</i>      | Ca_Desig_Chr02               | 440600                         | (T/A)       |
| 25182       | CadSNP777      | <i>Desi</i>      | Ca_Desig_Chr02               | 440607                         | (A/G)       |
| 25183       | CadSNP778      | <i>Desi</i>      | Ca_Desig_Chr02               | 440754                         | (T/A)       |
| 25184       | CadSNP779      | <i>Desi</i>      | Ca_Desig_Chr02               | 440724                         | (C/T)       |
| 25185       | CadSNP780      | <i>Desi</i>      | Ca_Desig_Chr02               | 440718                         | (G/T)       |
| 25186       | CadSNP781      | <i>Desi</i>      | Ca_Desig_Chr02               | 527661                         | (G/A)       |
| 25187       | CadSNP782      | <i>Desi</i>      | Ca_Desig_Chr02               | 527635                         | (C/A)       |
| 25188       | CadSNP783      | <i>Desi</i>      | Ca_Desig_Chr02               | 527634                         | (C/A)       |
| 25189       | CadSNP784      | <i>Desi</i>      | Ca_Desig_Chr02               | 527633                         | (T/A)       |
| 25190       | CadSNP785      | <i>Desi</i>      | Ca_Desig_Chr02               | 575365                         | (T/G)       |
| 25191       | CadSNP786      | <i>Desi</i>      | Ca_Desig_Chr02               | 575518                         | (A/G)       |
| 25192       | CadSNP787      | <i>Desi</i>      | Ca_Desig_Chr02               | 576524                         | (G/A)       |
| 25193       | CadSNP788      | <i>Desi</i>      | Ca_Desig_Chr02               | 576624                         | (A/G)       |

| <b>S.N.</b> | <b>SNP IDs</b> | <b>Cultivars</b> | <b>Chromosomes/scaffolds</b> | <b>Physical positions (bp)</b> | <b>SNPs</b> |
|-------------|----------------|------------------|------------------------------|--------------------------------|-------------|
| 25194       | CadSNP789      | <i>Desi</i>      | Ca_Desig_Chr02               | 579705                         | (G/A)       |
| 25195       | CadSNP790      | <i>Desi</i>      | Ca_Desig_Chr02               | 580263                         | (C/T)       |
| 25196       | CadSNP791      | <i>Desi</i>      | Ca_Desig_Chr02               | 595836                         | (T/A)       |
| 25197       | CadSNP792      | <i>Desi</i>      | Ca_Desig_Chr02               | 595837                         | (C/A)       |
| 25198       | CadSNP793      | <i>Desi</i>      | Ca_Desig_Chr02               | 595842                         | (T/A)       |
| 25199       | CadSNP794      | <i>Desi</i>      | Ca_Desig_Chr02               | 595845                         | (G/A)       |
| 25200       | CadSNP795      | <i>Desi</i>      | Ca_Desig_Chr02               | 595850                         | (A/T)       |
| 25201       | CadSNP796      | <i>Desi</i>      | Ca_Desig_Chr02               | 595851                         | (T/A)       |
| 25202       | CadSNP797      | <i>Desi</i>      | Ca_Desig_Chr02               | 595853                         | (C/A)       |
| 25203       | CadSNP798      | <i>Desi</i>      | Ca_Desig_Chr02               | 595863                         | (G/A)       |
| 25204       | CadSNP799      | <i>Desi</i>      | Ca_Desig_Chr02               | 727262                         | (G/C)       |
| 25205       | CadSNP800      | <i>Desi</i>      | Ca_Desig_Chr02               | 749831                         | (C/G)       |
| 25206       | CadSNP801      | <i>Desi</i>      | Ca_Desig_Chr02               | 760148                         | (C/T)       |
| 25207       | CadSNP802      | <i>Desi</i>      | Ca_Desig_Chr02               | 842935                         | (T/C)       |
| 25208       | CadSNP803      | <i>Desi</i>      | Ca_Desig_Chr02               | 842908                         | (T/C)       |
| 25209       | CadSNP804      | <i>Desi</i>      | Ca_Desig_Chr02               | 842943                         | (T/C)       |
| 25210       | CadSNP805      | <i>Desi</i>      | Ca_Desig_Chr02               | 930040                         | (T/C)       |
| 25211       | CadSNP806      | <i>Desi</i>      | Ca_Desig_Chr02               | 972909                         | (A/T)       |
| 25212       | CadSNP807      | <i>Desi</i>      | Ca_Desig_Chr02               | 972918                         | (C/A)       |
| 25213       | CadSNP808      | <i>Desi</i>      | Ca_Desig_Chr02               | 972921                         | (T/C)       |
| 25214       | CadSNP809      | <i>Desi</i>      | Ca_Desig_Chr02               | 972930                         | (G/A)       |
| 25215       | CadSNP810      | <i>Desi</i>      | Ca_Desig_Chr02               | 972933                         | (A/G)       |
| 25216       | CadSNP811      | <i>Desi</i>      | Ca_Desig_Chr02               | 992292                         | (C/A)       |
| 25217       | CadSNP812      | <i>Desi</i>      | Ca_Desig_Chr02               | 1019748                        | (G/A)       |
| 25218       | CadSNP813      | <i>Desi</i>      | Ca_Desig_Chr02               | 1019708                        | (A/T)       |
| 25219       | CadSNP814      | <i>Desi</i>      | Ca_Desig_Chr02               | 1019692                        | (G/T)       |
| 25220       | CadSNP815      | <i>Desi</i>      | Ca_Desig_Chr02               | 1019793                        | (C/T)       |
| 25221       | CadSNP816      | <i>Desi</i>      | Ca_Desig_Chr02               | 1048681                        | (G/T)       |
| 25222       | CadSNP817      | <i>Desi</i>      | Ca_Desig_Chr02               | 1048657                        | (G/A)       |
| 25223       | CadSNP818      | <i>Desi</i>      | Ca_Desig_Chr02               | 1066639                        | (A/C)       |
| 25224       | CadSNP819      | <i>Desi</i>      | Ca_Desig_Chr02               | 1066693                        | (A/T)       |
| 25225       | CadSNP820      | <i>Desi</i>      | Ca_Desig_Chr02               | 1066672                        | (T/A)       |
| 25226       | CadSNP821      | <i>Desi</i>      | Ca_Desig_Chr02               | 1066647                        | (A/T)       |
| 25227       | CadSNP822      | <i>Desi</i>      | Ca_Desig_Chr02               | 1081581                        | (T/C)       |
| 25228       | CadSNP823      | <i>Desi</i>      | Ca_Desig_Chr02               | 1147386                        | (A/G)       |
| 25229       | CadSNP824      | <i>Desi</i>      | Ca_Desig_Chr02               | 1147402                        | (T/C)       |
| 25230       | CadSNP825      | <i>Desi</i>      | Ca_Desig_Chr02               | 1151458                        | (G/T)       |
| 25231       | CadSNP826      | <i>Desi</i>      | Ca_Desig_Chr02               | 1205892                        | (A/C)       |

| <b>S.N.</b> | <b>SNP IDs</b> | <b>Cultivars</b> | <b>Chromosomes/scaffolds</b> | <b>Physical positions (bp)</b> | <b>SNPs</b> |
|-------------|----------------|------------------|------------------------------|--------------------------------|-------------|
| 25232       | CadSNP827      | <i>Desi</i>      | Ca_Desig_Chr02               | 1220563                        | (G/C)       |
| 25233       | CadSNP828      | <i>Desi</i>      | Ca_Desig_Chr02               | 1367073                        | (C/A)       |
| 25234       | CadSNP829      | <i>Desi</i>      | Ca_Desig_Chr02               | 1369594                        | (G/T)       |
| 25235       | CadSNP830      | <i>Desi</i>      | Ca_Desig_Chr02               | 1369598                        | (G/T)       |
| 25236       | CadSNP831      | <i>Desi</i>      | Ca_Desig_Chr02               | 1521985                        | (A/C)       |
| 25237       | CadSNP832      | <i>Desi</i>      | Ca_Desig_Chr02               | 1521957                        | (A/C)       |
| 25238       | CadSNP833      | <i>Desi</i>      | Ca_Desig_Chr02               | 1557630                        | (G/T)       |
| 25239       | CadSNP834      | <i>Desi</i>      | Ca_Desig_Chr02               | 1565698                        | (G/A)       |
| 25240       | CadSNP835      | <i>Desi</i>      | Ca_Desig_Chr02               | 1565686                        | (A/G)       |
| 25241       | CadSNP836      | <i>Desi</i>      | Ca_Desig_Chr02               | 1565676                        | (C/T)       |
| 25242       | CadSNP837      | <i>Desi</i>      | Ca_Desig_Chr02               | 1621762                        | (C/A)       |
| 25243       | CadSNP838      | <i>Desi</i>      | Ca_Desig_Chr02               | 1846506                        | (G/T)       |
| 25244       | CadSNP839      | <i>Desi</i>      | Ca_Desig_Chr02               | 1857220                        | (G/A)       |
| 25245       | CadSNP840      | <i>Desi</i>      | Ca_Desig_Chr02               | 1857224                        | (A/G)       |
| 25246       | CadSNP841      | <i>Desi</i>      | Ca_Desig_Chr02               | 1861385                        | (A/G)       |
| 25247       | CadSNP842      | <i>Desi</i>      | Ca_Desig_Chr02               | 1861412                        | (G/A)       |
| 25248       | CadSNP843      | <i>Desi</i>      | Ca_Desig_Chr02               | 1861525                        | (G/A)       |
| 25249       | CadSNP844      | <i>Desi</i>      | Ca_Desig_Chr02               | 1861519                        | (C/T)       |
| 25250       | CadSNP845      | <i>Desi</i>      | Ca_Desig_Chr02               | 1868000                        | (A/G)       |
| 25251       | CadSNP846      | <i>Desi</i>      | Ca_Desig_Chr02               | 1883048                        | (A/G)       |
| 25252       | CadSNP847      | <i>Desi</i>      | Ca_Desig_Chr02               | 1883019                        | (A/G)       |
| 25253       | CadSNP848      | <i>Desi</i>      | Ca_Desig_Chr02               | 1894083                        | (A/T)       |
| 25254       | CadSNP849      | <i>Desi</i>      | Ca_Desig_Chr02               | 1954750                        | (A/C)       |
| 25255       | CadSNP850      | <i>Desi</i>      | Ca_Desig_Chr02               | 1958652                        | (A/C)       |
| 25256       | CadSNP851      | <i>Desi</i>      | Ca_Desig_Chr02               | 1959776                        | (C/T)       |
| 25257       | CadSNP852      | <i>Desi</i>      | Ca_Desig_Chr02               | 1996590                        | (T/C)       |
| 25258       | CadSNP853      | <i>Desi</i>      | Ca_Desig_Chr02               | 1996699                        | (G/A)       |
| 25259       | CadSNP854      | <i>Desi</i>      | Ca_Desig_Chr02               | 2100229                        | (C/T)       |
| 25260       | CadSNP855      | <i>Desi</i>      | Ca_Desig_Chr02               | 2308597                        | (A/G)       |
| 25261       | CadSNP856      | <i>Desi</i>      | Ca_Desig_Chr02               | 2308730                        | (G/A)       |
| 25262       | CadSNP857      | <i>Desi</i>      | Ca_Desig_Chr02               | 2326287                        | (G/C)       |
| 25263       | CadSNP858      | <i>Desi</i>      | Ca_Desig_Chr02               | 2344280                        | (G/A)       |
| 25264       | CadSNP859      | <i>Desi</i>      | Ca_Desig_Chr02               | 2344333                        | (T/C)       |
| 25265       | CadSNP860      | <i>Desi</i>      | Ca_Desig_Chr02               | 2361308                        | (G/A)       |
| 25266       | CadSNP861      | <i>Desi</i>      | Ca_Desig_Chr02               | 2361249                        | (T/C)       |
| 25267       | CadSNP862      | <i>Desi</i>      | Ca_Desig_Chr02               | 2363610                        | (C/G)       |
| 25268       | CadSNP863      | <i>Desi</i>      | Ca_Desig_Chr02               | 2379453                        | (A/G)       |
| 25269       | CadSNP864      | <i>Desi</i>      | Ca_Desig_Chr02               | 2406652                        | (A/G)       |

| <b>S.N.</b> | <b>SNP IDs</b> | <b>Cultivars</b> | <b>Chromosomes/scaffolds</b> | <b>Physical positions (bp)</b> | <b>SNPs</b> |
|-------------|----------------|------------------|------------------------------|--------------------------------|-------------|
| 25270       | CadSNP865      | <i>Desi</i>      | Ca_Desig_Chr02               | 2449541                        | (T/G)       |
| 25271       | CadSNP866      | <i>Desi</i>      | Ca_Desig_Chr02               | 2449576                        | (T/A)       |
| 25272       | CadSNP867      | <i>Desi</i>      | Ca_Desig_Chr02               | 2461994                        | (T/A)       |
| 25273       | CadSNP868      | <i>Desi</i>      | Ca_Desig_Chr02               | 2488147                        | (A/G)       |
| 25274       | CadSNP869      | <i>Desi</i>      | Ca_Desig_Chr02               | 2488151                        | (C/T)       |
| 25275       | CadSNP870      | <i>Desi</i>      | Ca_Desig_Chr02               | 2488181                        | (T/G)       |
| 25276       | CadSNP871      | <i>Desi</i>      | Ca_Desig_Chr02               | 2527417                        | (C/T)       |
| 25277       | CadSNP872      | <i>Desi</i>      | Ca_Desig_Chr02               | 2527461                        | (C/T)       |
| 25278       | CadSNP873      | <i>Desi</i>      | Ca_Desig_Chr02               | 2565668                        | (G/A)       |
| 25279       | CadSNP874      | <i>Desi</i>      | Ca_Desig_Chr02               | 2574544                        | (T/C)       |
| 25280       | CadSNP875      | <i>Desi</i>      | Ca_Desig_Chr02               | 2600740                        | (G/T)       |
| 25281       | CadSNP876      | <i>Desi</i>      | Ca_Desig_Chr02               | 2600744                        | (G/T)       |
| 25282       | CadSNP877      | <i>Desi</i>      | Ca_Desig_Chr02               | 2600751                        | (C/T)       |
| 25283       | CadSNP878      | <i>Desi</i>      | Ca_Desig_Chr02               | 2607635                        | (G/C)       |
| 25284       | CadSNP879      | <i>Desi</i>      | Ca_Desig_Chr02               | 2607620                        | (T/G)       |
| 25285       | CadSNP880      | <i>Desi</i>      | Ca_Desig_Chr02               | 2607603                        | (T/G)       |
| 25286       | CadSNP881      | <i>Desi</i>      | Ca_Desig_Chr02               | 2607737                        | (T/A)       |
| 25287       | CadSNP882      | <i>Desi</i>      | Ca_Desig_Chr02               | 2607804                        | (A/C)       |
| 25288       | CadSNP883      | <i>Desi</i>      | Ca_Desig_Chr02               | 2607820                        | (G/T)       |
| 25289       | CadSNP884      | <i>Desi</i>      | Ca_Desig_Chr02               | 2607827                        | (T/G)       |
| 25290       | CadSNP885      | <i>Desi</i>      | Ca_Desig_Chr02               | 2607828                        | (A/T)       |
| 25291       | CadSNP886      | <i>Desi</i>      | Ca_Desig_Chr02               | 2607993                        | (A/T)       |
| 25292       | CadSNP887      | <i>Desi</i>      | Ca_Desig_Chr02               | 2608058                        | (G/A)       |
| 25293       | CadSNP888      | <i>Desi</i>      | Ca_Desig_Chr02               | 2608080                        | (C/T)       |
| 25294       | CadSNP889      | <i>Desi</i>      | Ca_Desig_Chr02               | 2608756                        | (A/G)       |
| 25295       | CadSNP890      | <i>Desi</i>      | Ca_Desig_Chr02               | 2704878                        | (C/T)       |
| 25296       | CadSNP891      | <i>Desi</i>      | Ca_Desig_Chr02               | 2764423                        | (C/G)       |
| 25297       | CadSNP892      | <i>Desi</i>      | Ca_Desig_Chr02               | 2764465                        | (A/G)       |
| 25298       | CadSNP893      | <i>Desi</i>      | Ca_Desig_Chr02               | 2764476                        | (T/C)       |
| 25299       | CadSNP894      | <i>Desi</i>      | Ca_Desig_Chr02               | 2764617                        | (C/T)       |
| 25300       | CadSNP895      | <i>Desi</i>      | Ca_Desig_Chr02               | 2764833                        | (T/C)       |
| 25301       | CadSNP896      | <i>Desi</i>      | Ca_Desig_Chr02               | 2849625                        | (G/A)       |
| 25302       | CadSNP897      | <i>Desi</i>      | Ca_Desig_Chr02               | 2879030                        | (T/A)       |
| 25303       | CadSNP898      | <i>Desi</i>      | Ca_Desig_Chr02               | 2890359                        | (G/A)       |
| 25304       | CadSNP899      | <i>Desi</i>      | Ca_Desig_Chr02               | 2956401                        | (A/G)       |
| 25305       | CadSNP900      | <i>Desi</i>      | Ca_Desig_Chr02               | 3068073                        | (T/A)       |
| 25306       | CadSNP901      | <i>Desi</i>      | Ca_Desig_Chr02               | 3069887                        | (A/G)       |
| 25307       | CadSNP902      | <i>Desi</i>      | Ca_Desig_Chr02               | 3069889                        | (T/A)       |

| <b>S.N.</b> | <b>SNP IDs</b> | <b>Cultivars</b> | <b>Chromosomes/scaffolds</b> | <b>Physical positions (bp)</b> | <b>SNPs</b> |
|-------------|----------------|------------------|------------------------------|--------------------------------|-------------|
| 25308       | CadSNP903      | <i>Desi</i>      | Ca_Desig_Chr02               | 3118713                        | (T/G)       |
| 25309       | CadSNP904      | <i>Desi</i>      | Ca_Desig_Chr02               | 3331580                        | (G/T)       |
| 25310       | CadSNP905      | <i>Desi</i>      | Ca_Desig_Chr02               | 3360033                        | (A/T)       |
| 25311       | CadSNP906      | <i>Desi</i>      | Ca_Desig_Chr02               | 3589210                        | (C/T)       |
| 25312       | CadSNP907      | <i>Desi</i>      | Ca_Desig_Chr02               | 3589227                        | (G/A)       |
| 25313       | CadSNP908      | <i>Desi</i>      | Ca_Desig_Chr02               | 3589397                        | (G/A)       |
| 25314       | CadSNP909      | <i>Desi</i>      | Ca_Desig_Chr02               | 3604220                        | (C/A)       |
| 25315       | CadSNP910      | <i>Desi</i>      | Ca_Desig_Chr02               | 3604390                        | (G/A)       |
| 25316       | CadSNP911      | <i>Desi</i>      | Ca_Desig_Chr02               | 3604373                        | (A/G)       |
| 25317       | CadSNP912      | <i>Desi</i>      | Ca_Desig_Chr02               | 3604348                        | (G/A)       |
| 25318       | CadSNP913      | <i>Desi</i>      | Ca_Desig_Chr02               | 3604347                        | (T/C)       |
| 25319       | CadSNP914      | <i>Desi</i>      | Ca_Desig_Chr02               | 3604341                        | (G/A)       |
| 25320       | CadSNP915      | <i>Desi</i>      | Ca_Desig_Chr02               | 3604339                        | (A/C)       |
| 25321       | CadSNP916      | <i>Desi</i>      | Ca_Desig_Chr02               | 3604329                        | (G/A)       |
| 25322       | CadSNP917      | <i>Desi</i>      | Ca_Desig_Chr02               | 3604402                        | (A/C)       |
| 25323       | CadSNP918      | <i>Desi</i>      | Ca_Desig_Chr02               | 3604419                        | (T/C)       |
| 25324       | CadSNP919      | <i>Desi</i>      | Ca_Desig_Chr02               | 3722112                        | (T/C)       |
| 25325       | CadSNP920      | <i>Desi</i>      | Ca_Desig_Chr02               | 3722164                        | (T/A)       |
| 25326       | CadSNP921      | <i>Desi</i>      | Ca_Desig_Chr02               | 3722146                        | (A/G)       |
| 25327       | CadSNP922      | <i>Desi</i>      | Ca_Desig_Chr02               | 3750227                        | (C/A)       |
| 25328       | CadSNP923      | <i>Desi</i>      | Ca_Desig_Chr02               | 3750343                        | (T/A)       |
| 25329       | CadSNP924      | <i>Desi</i>      | Ca_Desig_Chr02               | 3750312                        | (A/G)       |
| 25330       | CadSNP925      | <i>Desi</i>      | Ca_Desig_Chr02               | 3750295                        | (T/C)       |
| 25331       | CadSNP926      | <i>Desi</i>      | Ca_Desig_Chr02               | 3756279                        | (C/A)       |
| 25332       | CadSNP927      | <i>Desi</i>      | Ca_Desig_Chr02               | 3756269                        | (A/C)       |
| 25333       | CadSNP928      | <i>Desi</i>      | Ca_Desig_Chr02               | 3756677                        | (T/C)       |
| 25334       | CadSNP929      | <i>Desi</i>      | Ca_Desig_Chr02               | 3854174                        | (C/T)       |
| 25335       | CadSNP930      | <i>Desi</i>      | Ca_Desig_Chr02               | 3854173                        | (A/T)       |
| 25336       | CadSNP931      | <i>Desi</i>      | Ca_Desig_Chr02               | 3930203                        | (C/G)       |
| 25337       | CadSNP932      | <i>Desi</i>      | Ca_Desig_Chr02               | 4041350                        | (C/T)       |
| 25338       | CadSNP933      | <i>Desi</i>      | Ca_Desig_Chr02               | 4041319                        | (A/G)       |
| 25339       | CadSNP934      | <i>Desi</i>      | Ca_Desig_Chr02               | 4058389                        | (G/A)       |
| 25340       | CadSNP935      | <i>Desi</i>      | Ca_Desig_Chr02               | 4125467                        | (G/A)       |
| 25341       | CadSNP936      | <i>Desi</i>      | Ca_Desig_Chr02               | 4185142                        | (A/G)       |
| 25342       | CadSNP937      | <i>Desi</i>      | Ca_Desig_Chr02               | 4185428                        | (T/A)       |
| 25343       | CadSNP938      | <i>Desi</i>      | Ca_Desig_Chr02               | 4185422                        | (T/C)       |
| 25344       | CadSNP939      | <i>Desi</i>      | Ca_Desig_Chr02               | 4185408                        | (A/G)       |
| 25345       | CadSNP940      | <i>Desi</i>      | Ca_Desig_Chr02               | 4185394                        | (A/T)       |

| <b>S.N.</b> | <b>SNP IDs</b> | <b>Cultivars</b> | <b>Chromosomes/scaffolds</b> | <b>Physical positions (bp)</b> | <b>SNPs</b> |
|-------------|----------------|------------------|------------------------------|--------------------------------|-------------|
| 25346       | CadSNP941      | <i>Desi</i>      | Ca_Desig_Chr02               | 4190614                        | (C/T)       |
| 25347       | CadSNP942      | <i>Desi</i>      | Ca_Desig_Chr02               | 4190767                        | (T/A)       |
| 25348       | CadSNP943      | <i>Desi</i>      | Ca_Desig_Chr02               | 4212810                        | (A/G)       |
| 25349       | CadSNP944      | <i>Desi</i>      | Ca_Desig_Chr02               | 4238261                        | (G/A)       |
| 25350       | CadSNP945      | <i>Desi</i>      | Ca_Desig_Chr02               | 4527225                        | (T/A)       |
| 25351       | CadSNP946      | <i>Desi</i>      | Ca_Desig_Chr02               | 4527227                        | (A/G)       |
| 25352       | CadSNP947      | <i>Desi</i>      | Ca_Desig_Chr02               | 4527234                        | (A/G)       |
| 25353       | CadSNP948      | <i>Desi</i>      | Ca_Desig_Chr02               | 4528767                        | (A/T)       |
| 25354       | CadSNP949      | <i>Desi</i>      | Ca_Desig_Chr02               | 4552112                        | (C/T)       |
| 25355       | CadSNP950      | <i>Desi</i>      | Ca_Desig_Chr02               | 4727092                        | (G/C)       |
| 25356       | CadSNP951      | <i>Desi</i>      | Ca_Desig_Chr02               | 5116790                        | (C/T)       |
| 25357       | CadSNP952      | <i>Desi</i>      | Ca_Desig_Chr02               | 5116882                        | (G/A)       |
| 25358       | CadSNP953      | <i>Desi</i>      | Ca_Desig_Chr02               | 5168628                        | (T/A)       |
| 25359       | CadSNP954      | <i>Desi</i>      | Ca_Desig_Chr02               | 5168645                        | (C/A)       |
| 25360       | CadSNP955      | <i>Desi</i>      | Ca_Desig_Chr02               | 5213222                        | (G/A)       |
| 25361       | CadSNP956      | <i>Desi</i>      | Ca_Desig_Chr02               | 5223443                        | (G/A)       |
| 25362       | CadSNP957      | <i>Desi</i>      | Ca_Desig_Chr02               | 5400370                        | (A/T)       |
| 25363       | CadSNP958      | <i>Desi</i>      | Ca_Desig_Chr02               | 5400364                        | (C/T)       |
| 25364       | CadSNP959      | <i>Desi</i>      | Ca_Desig_Chr02               | 5448589                        | (C/A)       |
| 25365       | CadSNP960      | <i>Desi</i>      | Ca_Desig_Chr02               | 5462566                        | (C/G)       |
| 25366       | CadSNP961      | <i>Desi</i>      | Ca_Desig_Chr02               | 5466959                        | (C/T)       |
| 25367       | CadSNP962      | <i>Desi</i>      | Ca_Desig_Chr02               | 5466961                        | (A/G)       |
| 25368       | CadSNP963      | <i>Desi</i>      | Ca_Desig_Chr02               | 5466969                        | (T/A)       |
| 25369       | CadSNP964      | <i>Desi</i>      | Ca_Desig_Chr02               | 5466993                        | (C/T)       |
| 25370       | CadSNP965      | <i>Desi</i>      | Ca_Desig_Chr02               | 5467020                        | (G/A)       |
| 25371       | CadSNP966      | <i>Desi</i>      | Ca_Desig_Chr02               | 5472865                        | (A/G)       |
| 25372       | CadSNP967      | <i>Desi</i>      | Ca_Desig_Chr02               | 5472802                        | (T/C)       |
| 25373       | CadSNP968      | <i>Desi</i>      | Ca_Desig_Chr02               | 5503519                        | (G/A)       |
| 25374       | CadSNP969      | <i>Desi</i>      | Ca_Desig_Chr02               | 5503511                        | (G/T)       |
| 25375       | CadSNP970      | <i>Desi</i>      | Ca_Desig_Chr02               | 5503509                        | (A/G)       |
| 25376       | CadSNP971      | <i>Desi</i>      | Ca_Desig_Chr02               | 5503507                        | (C/A)       |
| 25377       | CadSNP972      | <i>Desi</i>      | Ca_Desig_Chr02               | 5503492                        | (G/A)       |
| 25378       | CadSNP973      | <i>Desi</i>      | Ca_Desig_Chr02               | 5503490                        | (T/G)       |
| 25379       | CadSNP974      | <i>Desi</i>      | Ca_Desig_Chr02               | 5503486                        | (G/A)       |
| 25380       | CadSNP975      | <i>Desi</i>      | Ca_Desig_Chr02               | 5503637                        | (C/G)       |
| 25381       | CadSNP976      | <i>Desi</i>      | Ca_Desig_Chr02               | 5503732                        | (G/C)       |
| 25382       | CadSNP977      | <i>Desi</i>      | Ca_Desig_Chr02               | 5503727                        | (T/G)       |
| 25383       | CadSNP978      | <i>Desi</i>      | Ca_Desig_Chr02               | 5513741                        | (T/C)       |

| <b>S.N.</b> | <b>SNP IDs</b> | <b>Cultivars</b> | <b>Chromosomes/scaffolds</b> | <b>Physical positions (bp)</b> | <b>SNPs</b> |
|-------------|----------------|------------------|------------------------------|--------------------------------|-------------|
| 25384       | CadSNP979      | <i>Desi</i>      | Ca_Desig_Chr02               | 5530121                        | (C/T)       |
| 25385       | CadSNP980      | <i>Desi</i>      | Ca_Desig_Chr02               | 5548819                        | (G/A)       |
| 25386       | CadSNP981      | <i>Desi</i>      | Ca_Desig_Chr02               | 5548807                        | (C/G)       |
| 25387       | CadSNP982      | <i>Desi</i>      | Ca_Desig_Chr02               | 5549174                        | (G/A)       |
| 25388       | CadSNP983      | <i>Desi</i>      | Ca_Desig_Chr02               | 5549164                        | (T/C)       |
| 25389       | CadSNP984      | <i>Desi</i>      | Ca_Desig_Chr02               | 5549156                        | (T/A)       |
| 25390       | CadSNP985      | <i>Desi</i>      | Ca_Desig_Chr02               | 5549150                        | (C/A)       |
| 25391       | CadSNP986      | <i>Desi</i>      | Ca_Desig_Chr02               | 5549966                        | (A/T)       |
| 25392       | CadSNP987      | <i>Desi</i>      | Ca_Desig_Chr02               | 5550007                        | (G/A)       |
| 25393       | CadSNP988      | <i>Desi</i>      | Ca_Desig_Chr02               | 5550009                        | (A/C)       |
| 25394       | CadSNP989      | <i>Desi</i>      | Ca_Desig_Chr02               | 5577178                        | (A/T)       |
| 25395       | CadSNP990      | <i>Desi</i>      | Ca_Desig_Chr02               | 5632043                        | (A/G)       |
| 25396       | CadSNP991      | <i>Desi</i>      | Ca_Desig_Chr02               | 5635080                        | (T/C)       |
| 25397       | CadSNP992      | <i>Desi</i>      | Ca_Desig_Chr02               | 5635215                        | (A/C)       |
| 25398       | CadSNP993      | <i>Desi</i>      | Ca_Desig_Chr02               | 5635178                        | (A/T)       |
| 25399       | CadSNP994      | <i>Desi</i>      | Ca_Desig_Chr02               | 5648550                        | (A/G)       |
| 25400       | CadSNP995      | <i>Desi</i>      | Ca_Desig_Chr02               | 5661404                        | (C/T)       |
| 25401       | CadSNP996      | <i>Desi</i>      | Ca_Desig_Chr02               | 5661407                        | (A/G)       |
| 25402       | CadSNP997      | <i>Desi</i>      | Ca_Desig_Chr02               | 5661416                        | (A/G)       |
| 25403       | CadSNP998      | <i>Desi</i>      | Ca_Desig_Chr02               | 5661427                        | (A/G)       |
| 25404       | CadSNP999      | <i>Desi</i>      | Ca_Desig_Chr02               | 5661431                        | (G/T)       |
| 25405       | CadSNP1000     | <i>Desi</i>      | Ca_Desig_Chr02               | 5661464                        | (A/T)       |
| 25406       | CadSNP1001     | <i>Desi</i>      | Ca_Desig_Chr02               | 5661470                        | (A/T)       |
| 25407       | CadSNP1002     | <i>Desi</i>      | Ca_Desig_Chr02               | 5661482                        | (A/G)       |
| 25408       | CadSNP1003     | <i>Desi</i>      | Ca_Desig_Chr02               | 5661485                        | (G/C)       |
| 25409       | CadSNP1004     | <i>Desi</i>      | Ca_Desig_Chr02               | 5661500                        | (A/G)       |
| 25410       | CadSNP1005     | <i>Desi</i>      | Ca_Desig_Chr02               | 5661498                        | (T/C)       |
| 25411       | CadSNP1006     | <i>Desi</i>      | Ca_Desig_Chr02               | 5661494                        | (T/A)       |
| 25412       | CadSNP1007     | <i>Desi</i>      | Ca_Desig_Chr02               | 5694128                        | (G/T)       |
| 25413       | CadSNP1008     | <i>Desi</i>      | Ca_Desig_Chr02               | 5694127                        | (C/T)       |
| 25414       | CadSNP1009     | <i>Desi</i>      | Ca_Desig_Chr02               | 5694118                        | (T/C)       |
| 25415       | CadSNP1010     | <i>Desi</i>      | Ca_Desig_Chr02               | 5698170                        | (T/A)       |
| 25416       | CadSNP1011     | <i>Desi</i>      | Ca_Desig_Chr02               | 5698197                        | (G/A)       |
| 25417       | CadSNP1012     | <i>Desi</i>      | Ca_Desig_Chr02               | 5698994                        | (G/C)       |
| 25418       | CadSNP1013     | <i>Desi</i>      | Ca_Desig_Chr02               | 5698976                        | (C/T)       |
| 25419       | CadSNP1014     | <i>Desi</i>      | Ca_Desig_Chr02               | 5699101                        | (G/A)       |
| 25420       | CadSNP1015     | <i>Desi</i>      | Ca_Desig_Chr02               | 5699314                        | (A/G)       |
| 25421       | CadSNP1016     | <i>Desi</i>      | Ca_Desig_Chr02               | 5699361                        | (G/A)       |

| <b>S.N.</b> | <b>SNP IDs</b> | <b>Cultivars</b> | <b>Chromosomes/scaffolds</b> | <b>Physical positions (bp)</b> | <b>SNPs</b> |
|-------------|----------------|------------------|------------------------------|--------------------------------|-------------|
| 25422       | CadSNP1017     | <i>Desi</i>      | Ca_Desig_Chr02               | 5699391                        | (T/A)       |
| 25423       | CadSNP1018     | <i>Desi</i>      | Ca_Desig_Chr02               | 5699393                        | (G/A)       |
| 25424       | CadSNP1019     | <i>Desi</i>      | Ca_Desig_Chr02               | 5733756                        | (C/A)       |
| 25425       | CadSNP1020     | <i>Desi</i>      | Ca_Desig_Chr02               | 5740309                        | (C/A)       |
| 25426       | CadSNP1021     | <i>Desi</i>      | Ca_Desig_Chr02               | 5745142                        | (C/T)       |
| 25427       | CadSNP1022     | <i>Desi</i>      | Ca_Desig_Chr02               | 5917902                        | (G/A)       |
| 25428       | CadSNP1023     | <i>Desi</i>      | Ca_Desig_Chr02               | 5965393                        | (G/T)       |
| 25429       | CadSNP1024     | <i>Desi</i>      | Ca_Desig_Chr02               | 5965391                        | (C/T)       |
| 25430       | CadSNP1025     | <i>Desi</i>      | Ca_Desig_Chr02               | 5966192                        | (C/T)       |
| 25431       | CadSNP1026     | <i>Desi</i>      | Ca_Desig_Chr02               | 5988875                        | (T/A)       |
| 25432       | CadSNP1027     | <i>Desi</i>      | Ca_Desig_Chr02               | 6010840                        | (G/A)       |
| 25433       | CadSNP1028     | <i>Desi</i>      | Ca_Desig_Chr02               | 6011026                        | (G/A)       |
| 25434       | CadSNP1029     | <i>Desi</i>      | Ca_Desig_Chr02               | 6018033                        | (C/T)       |
| 25435       | CadSNP1030     | <i>Desi</i>      | Ca_Desig_Chr02               | 6019934                        | (G/T)       |
| 25436       | CadSNP1031     | <i>Desi</i>      | Ca_Desig_Chr02               | 6020224                        | (G/A)       |
| 25437       | CadSNP1032     | <i>Desi</i>      | Ca_Desig_Chr02               | 6022635                        | (G/A)       |
| 25438       | CadSNP1033     | <i>Desi</i>      | Ca_Desig_Chr02               | 6022627                        | (T/G)       |
| 25439       | CadSNP1034     | <i>Desi</i>      | Ca_Desig_Chr02               | 6022619                        | (C/T)       |
| 25440       | CadSNP1035     | <i>Desi</i>      | Ca_Desig_Chr02               | 6048386                        | (T/A)       |
| 25441       | CadSNP1036     | <i>Desi</i>      | Ca_Desig_Chr02               | 6053043                        | (A/T)       |
| 25442       | CadSNP1037     | <i>Desi</i>      | Ca_Desig_Chr02               | 6071359                        | (C/T)       |
| 25443       | CadSNP1038     | <i>Desi</i>      | Ca_Desig_Chr02               | 6088304                        | (C/T)       |
| 25444       | CadSNP1039     | <i>Desi</i>      | Ca_Desig_Chr02               | 6089048                        | (T/C)       |
| 25445       | CadSNP1040     | <i>Desi</i>      | Ca_Desig_Chr02               | 6089257                        | (G/A)       |
| 25446       | CadSNP1041     | <i>Desi</i>      | Ca_Desig_Chr02               | 6091962                        | (C/T)       |
| 25447       | CadSNP1042     | <i>Desi</i>      | Ca_Desig_Chr02               | 6091970                        | (A/C)       |
| 25448       | CadSNP1043     | <i>Desi</i>      | Ca_Desig_Chr02               | 6091973                        | (T/G)       |
| 25449       | CadSNP1044     | <i>Desi</i>      | Ca_Desig_Chr02               | 6092094                        | (A/G)       |
| 25450       | CadSNP1045     | <i>Desi</i>      | Ca_Desig_Chr02               | 6092092                        | (G/A)       |
| 25451       | CadSNP1046     | <i>Desi</i>      | Ca_Desig_Chr02               | 6092158                        | (G/C)       |
| 25452       | CadSNP1047     | <i>Desi</i>      | Ca_Desig_Chr02               | 6092265                        | (A/G)       |
| 25453       | CadSNP1048     | <i>Desi</i>      | Ca_Desig_Chr02               | 6092376                        | (T/C)       |
| 25454       | CadSNP1049     | <i>Desi</i>      | Ca_Desig_Chr02               | 6092347                        | (T/G)       |
| 25455       | CadSNP1050     | <i>Desi</i>      | Ca_Desig_Chr02               | 6092444                        | (C/T)       |
| 25456       | CadSNP1051     | <i>Desi</i>      | Ca_Desig_Chr02               | 6094379                        | (C/G)       |
| 25457       | CadSNP1052     | <i>Desi</i>      | Ca_Desig_Chr02               | 6103902                        | (T/C)       |
| 25458       | CadSNP1053     | <i>Desi</i>      | Ca_Desig_Chr02               | 6107446                        | (A/C)       |
| 25459       | CadSNP1054     | <i>Desi</i>      | Ca_Desig_Chr02               | 6107432                        | (G/T)       |



| <b>S.N.</b> | <b>SNP IDs</b> | <b>Cultivars</b> | <b>Chromosomes/scaffolds</b> | <b>Physical positions (bp)</b> | <b>SNPs</b> |
|-------------|----------------|------------------|------------------------------|--------------------------------|-------------|
| 25460       | CadSNP1055     | <i>Desi</i>      | Ca_Desig_Chr02               | 6131587                        | (T/C)       |
| 25461       | CadSNP1056     | <i>Desi</i>      | Ca_Desig_Chr02               | 6135210                        | (G/A)       |
| 25462       | CadSNP1057     | <i>Desi</i>      | Ca_Desig_Chr02               | 6138794                        | (T/G)       |
| 25463       | CadSNP1058     | <i>Desi</i>      | Ca_Desig_Chr02               | 6138861                        | (C/T)       |
| 25464       | CadSNP1059     | <i>Desi</i>      | Ca_Desig_Chr02               | 6138912                        | (C/T)       |
| 25465       | CadSNP1060     | <i>Desi</i>      | Ca_Desig_Chr02               | 6138975                        | (A/T)       |
| 25466       | CadSNP1061     | <i>Desi</i>      | Ca_Desig_Chr02               | 6138976                        | (G/T)       |
| 25467       | CadSNP1062     | <i>Desi</i>      | Ca_Desig_Chr02               | 6139045                        | (A/G)       |
| 25468       | CadSNP1063     | <i>Desi</i>      | Ca_Desig_Chr02               | 6140423                        | (G/A)       |
| 25469       | CadSNP1064     | <i>Desi</i>      | Ca_Desig_Chr02               | 6140387                        | (T/C)       |
| 25470       | CadSNP1065     | <i>Desi</i>      | Ca_Desig_Chr02               | 6145109                        | (C/T)       |
| 25471       | CadSNP1066     | <i>Desi</i>      | Ca_Desig_Chr02               | 6145149                        | (T/A)       |
| 25472       | CadSNP1067     | <i>Desi</i>      | Ca_Desig_Chr02               | 6145148                        | (C/A)       |
| 25473       | CadSNP1068     | <i>Desi</i>      | Ca_Desig_Chr02               | 6145235                        | (C/T)       |
| 25474       | CadSNP1069     | <i>Desi</i>      | Ca_Desig_Chr02               | 6145253                        | (G/A)       |
| 25475       | CadSNP1070     | <i>Desi</i>      | Ca_Desig_Chr02               | 6145263                        | (G/A)       |
| 25476       | CadSNP1071     | <i>Desi</i>      | Ca_Desig_Chr02               | 6179369                        | (A/C)       |
| 25477       | CadSNP1072     | <i>Desi</i>      | Ca_Desig_Chr02               | 6243184                        | (C/T)       |
| 25478       | CadSNP1073     | <i>Desi</i>      | Ca_Desig_Chr02               | 6243219                        | (T/G)       |
| 25479       | CadSNP1074     | <i>Desi</i>      | Ca_Desig_Chr02               | 6249860                        | (G/A)       |
| 25480       | CadSNP1075     | <i>Desi</i>      | Ca_Desig_Chr02               | 6249876                        | (C/T)       |
| 25481       | CadSNP1076     | <i>Desi</i>      | Ca_Desig_Chr02               | 6249888                        | (C/A)       |
| 25482       | CadSNP1077     | <i>Desi</i>      | Ca_Desig_Chr02               | 6249889                        | (A/C)       |
| 25483       | CadSNP1078     | <i>Desi</i>      | Ca_Desig_Chr02               | 6249975                        | (T/C)       |
| 25484       | CadSNP1079     | <i>Desi</i>      | Ca_Desig_Chr02               | 6255732                        | (T/C)       |
| 25485       | CadSNP1080     | <i>Desi</i>      | Ca_Desig_Chr02               | 6265666                        | (A/G)       |
| 25486       | CadSNP1081     | <i>Desi</i>      | Ca_Desig_Chr02               | 6275717                        | (C/T)       |
| 25487       | CadSNP1082     | <i>Desi</i>      | Ca_Desig_Chr02               | 6436332                        | (T/A)       |
| 25488       | CadSNP1083     | <i>Desi</i>      | Ca_Desig_Chr02               | 6436365                        | (A/C)       |
| 25489       | CadSNP1084     | <i>Desi</i>      | Ca_Desig_Chr02               | 6436390                        | (G/T)       |
| 25490       | CadSNP1085     | <i>Desi</i>      | Ca_Desig_Chr02               | 6436396                        | (G/T)       |
| 25491       | CadSNP1086     | <i>Desi</i>      | Ca_Desig_Chr02               | 6437062                        | (A/T)       |
| 25492       | CadSNP1087     | <i>Desi</i>      | Ca_Desig_Chr02               | 6437145                        | (T/C)       |
| 25493       | CadSNP1088     | <i>Desi</i>      | Ca_Desig_Chr02               | 6532962                        | (C/T)       |
| 25494       | CadSNP1089     | <i>Desi</i>      | Ca_Desig_Chr02               | 6532976                        | (G/T)       |
| 25495       | CadSNP1090     | <i>Desi</i>      | Ca_Desig_Chr02               | 6535217                        | (C/T)       |
| 25496       | CadSNP1091     | <i>Desi</i>      | Ca_Desig_Chr02               | 6589542                        | (A/G)       |
| 25497       | CadSNP1092     | <i>Desi</i>      | Ca_Desig_Chr02               | 6589551                        | (T/C)       |

| <b>S.N.</b> | <b>SNP IDs</b> | <b>Cultivars</b> | <b>Chromosomes/scaffolds</b> | <b>Physical positions (bp)</b> | <b>SNPs</b> |
|-------------|----------------|------------------|------------------------------|--------------------------------|-------------|
| 25498       | CadSNP1093     | <i>Desi</i>      | Ca_Desig_Chr02               | 6589573                        | (G/A)       |
| 25499       | CadSNP1094     | <i>Desi</i>      | Ca_Desig_Chr02               | 6601251                        | (T/A)       |
| 25500       | CadSNP1095     | <i>Desi</i>      | Ca_Desig_Chr02               | 6608684                        | (T/C)       |
| 25501       | CadSNP1096     | <i>Desi</i>      | Ca_Desig_Chr02               | 6608737                        | (G/A)       |
| 25502       | CadSNP1097     | <i>Desi</i>      | Ca_Desig_Chr02               | 6609027                        | (G/T)       |
| 25503       | CadSNP1098     | <i>Desi</i>      | Ca_Desig_Chr02               | 6609053                        | (A/T)       |
| 25504       | CadSNP1099     | <i>Desi</i>      | Ca_Desig_Chr02               | 6614650                        | (G/A)       |
| 25505       | CadSNP1100     | <i>Desi</i>      | Ca_Desig_Chr02               | 6614735                        | (T/G)       |
| 25506       | CadSNP1101     | <i>Desi</i>      | Ca_Desig_Chr02               | 6614685                        | (G/A)       |
| 25507       | CadSNP1102     | <i>Desi</i>      | Ca_Desig_Chr02               | 6614760                        | (G/C)       |
| 25508       | CadSNP1103     | <i>Desi</i>      | Ca_Desig_Chr02               | 6622281                        | (T/A)       |
| 25509       | CadSNP1104     | <i>Desi</i>      | Ca_Desig_Chr02               | 6622600                        | (A/G)       |
| 25510       | CadSNP1105     | <i>Desi</i>      | Ca_Desig_Chr02               | 6624856                        | (T/C)       |
| 25511       | CadSNP1106     | <i>Desi</i>      | Ca_Desig_Chr02               | 6624907                        | (C/G)       |
| 25512       | CadSNP1107     | <i>Desi</i>      | Ca_Desig_Chr02               | 6651178                        | (A/T)       |
| 25513       | CadSNP1108     | <i>Desi</i>      | Ca_Desig_Chr02               | 6653902                        | (C/T)       |
| 25514       | CadSNP1109     | <i>Desi</i>      | Ca_Desig_Chr02               | 6653887                        | (A/G)       |
| 25515       | CadSNP1110     | <i>Desi</i>      | Ca_Desig_Chr02               | 6653879                        | (G/T)       |
| 25516       | CadSNP1111     | <i>Desi</i>      | Ca_Desig_Chr02               | 6669823                        | (C/G)       |
| 25517       | CadSNP1112     | <i>Desi</i>      | Ca_Desig_Chr02               | 6671859                        | (A/G)       |
| 25518       | CadSNP1113     | <i>Desi</i>      | Ca_Desig_Chr02               | 6701392                        | (G/A)       |
| 25519       | CadSNP1114     | <i>Desi</i>      | Ca_Desig_Chr02               | 6701394                        | (G/A)       |
| 25520       | CadSNP1115     | <i>Desi</i>      | Ca_Desig_Chr02               | 6711702                        | (C/T)       |
| 25521       | CadSNP1116     | <i>Desi</i>      | Ca_Desig_Chr02               | 6711747                        | (C/T)       |
| 25522       | CadSNP1117     | <i>Desi</i>      | Ca_Desig_Chr02               | 6711829                        | (T/G)       |
| 25523       | CadSNP1118     | <i>Desi</i>      | Ca_Desig_Chr02               | 6713000                        | (T/A)       |
| 25524       | CadSNP1119     | <i>Desi</i>      | Ca_Desig_Chr02               | 6908990                        | (A/G)       |
| 25525       | CadSNP1120     | <i>Desi</i>      | Ca_Desig_Chr02               | 6968294                        | (T/G)       |
| 25526       | CadSNP1121     | <i>Desi</i>      | Ca_Desig_Chr02               | 6968382                        | (C/G)       |
| 25527       | CadSNP1122     | <i>Desi</i>      | Ca_Desig_Chr02               | 6992535                        | (A/G)       |
| 25528       | CadSNP1123     | <i>Desi</i>      | Ca_Desig_Chr02               | 7059796                        | (C/T)       |
| 25529       | CadSNP1124     | <i>Desi</i>      | Ca_Desig_Chr02               | 7059783                        | (G/C)       |
| 25530       | CadSNP1125     | <i>Desi</i>      | Ca_Desig_Chr02               | 7062006                        | (A/G)       |
| 25531       | CadSNP1126     | <i>Desi</i>      | Ca_Desig_Chr02               | 7062059                        | (G/A)       |
| 25532       | CadSNP1127     | <i>Desi</i>      | Ca_Desig_Chr02               | 7082429                        | (A/G)       |
| 25533       | CadSNP1128     | <i>Desi</i>      | Ca_Desig_Chr02               | 7082437                        | (T/C)       |
| 25534       | CadSNP1129     | <i>Desi</i>      | Ca_Desig_Chr02               | 7082452                        | (A/C)       |
| 25535       | CadSNP1130     | <i>Desi</i>      | Ca_Desig_Chr02               | 7082486                        | (A/C)       |

| <b>S.N.</b> | <b>SNP IDs</b> | <b>Cultivars</b> | <b>Chromosomes/scaffolds</b> | <b>Physical positions (bp)</b> | <b>SNPs</b> |
|-------------|----------------|------------------|------------------------------|--------------------------------|-------------|
| 25536       | CadSNP1131     | <i>Desi</i>      | Ca_Desig_Chr02               | 7082872                        | (A/C)       |
| 25537       | CadSNP1132     | <i>Desi</i>      | Ca_Desig_Chr02               | 7082948                        | (C/G)       |
| 25538       | CadSNP1133     | <i>Desi</i>      | Ca_Desig_Chr02               | 7085006                        | (A/G)       |
| 25539       | CadSNP1134     | <i>Desi</i>      | Ca_Desig_Chr02               | 7084987                        | (T/C)       |
| 25540       | CadSNP1135     | <i>Desi</i>      | Ca_Desig_Chr02               | 7084976                        | (A/C)       |
| 25541       | CadSNP1136     | <i>Desi</i>      | Ca_Desig_Chr02               | 7113287                        | (G/T)       |
| 25542       | CadSNP1137     | <i>Desi</i>      | Ca_Desig_Chr02               | 7113358                        | (G/T)       |
| 25543       | CadSNP1138     | <i>Desi</i>      | Ca_Desig_Chr02               | 7222282                        | (T/A)       |
| 25544       | CadSNP1139     | <i>Desi</i>      | Ca_Desig_Chr02               | 7222474                        | (T/G)       |
| 25545       | CadSNP1140     | <i>Desi</i>      | Ca_Desig_Chr02               | 7222511                        | (T/A)       |
| 25546       | CadSNP1141     | <i>Desi</i>      | Ca_Desig_Chr02               | 7241676                        | (G/A)       |
| 25547       | CadSNP1142     | <i>Desi</i>      | Ca_Desig_Chr02               | 7241824                        | (G/A)       |
| 25548       | CadSNP1143     | <i>Desi</i>      | Ca_Desig_Chr02               | 7242108                        | (A/G)       |
| 25549       | CadSNP1144     | <i>Desi</i>      | Ca_Desig_Chr02               | 7242124                        | (G/A)       |
| 25550       | CadSNP1145     | <i>Desi</i>      | Ca_Desig_Chr02               | 7316884                        | (A/T)       |
| 25551       | CadSNP1146     | <i>Desi</i>      | Ca_Desig_Chr02               | 7317863                        | (G/A)       |
| 25552       | CadSNP1147     | <i>Desi</i>      | Ca_Desig_Chr02               | 7317845                        | (A/G)       |
| 25553       | CadSNP1148     | <i>Desi</i>      | Ca_Desig_Chr02               | 7327612                        | (C/T)       |
| 25554       | CadSNP1149     | <i>Desi</i>      | Ca_Desig_Chr02               | 7327751                        | (T/C)       |
| 25555       | CadSNP1150     | <i>Desi</i>      | Ca_Desig_Chr02               | 7353195                        | (G/A)       |
| 25556       | CadSNP1151     | <i>Desi</i>      | Ca_Desig_Chr02               | 7358767                        | (C/A)       |
| 25557       | CadSNP1152     | <i>Desi</i>      | Ca_Desig_Chr02               | 7389166                        | (G/A)       |
| 25558       | CadSNP1153     | <i>Desi</i>      | Ca_Desig_Chr02               | 7397445                        | (T/A)       |
| 25559       | CadSNP1154     | <i>Desi</i>      | Ca_Desig_Chr02               | 7409824                        | (C/T)       |
| 25560       | CadSNP1155     | <i>Desi</i>      | Ca_Desig_Chr02               | 7419315                        | (A/G)       |
| 25561       | CadSNP1156     | <i>Desi</i>      | Ca_Desig_Chr02               | 7438626                        | (G/A)       |
| 25562       | CadSNP1157     | <i>Desi</i>      | Ca_Desig_Chr02               | 7457010                        | (C/T)       |
| 25563       | CadSNP1158     | <i>Desi</i>      | Ca_Desig_Chr02               | 7458342                        | (G/A)       |
| 25564       | CadSNP1159     | <i>Desi</i>      | Ca_Desig_Chr02               | 7459382                        | (G/A)       |
| 25565       | CadSNP1160     | <i>Desi</i>      | Ca_Desig_Chr02               | 7462051                        | (A/C)       |
| 25566       | CadSNP1161     | <i>Desi</i>      | Ca_Desig_Chr02               | 7471326                        | (T/C)       |
| 25567       | CadSNP1162     | <i>Desi</i>      | Ca_Desig_Chr02               | 7471357                        | (T/C)       |
| 25568       | CadSNP1163     | <i>Desi</i>      | Ca_Desig_Chr02               | 7585941                        | (G/A)       |
| 25569       | CadSNP1164     | <i>Desi</i>      | Ca_Desig_Chr02               | 7610221                        | (T/C)       |
| 25570       | CadSNP1165     | <i>Desi</i>      | Ca_Desig_Chr02               | 7610503                        | (T/C)       |
| 25571       | CadSNP1166     | <i>Desi</i>      | Ca_Desig_Chr02               | 7630044                        | (G/A)       |
| 25572       | CadSNP1167     | <i>Desi</i>      | Ca_Desig_Chr02               | 7659346                        | (C/T)       |
| 25573       | CadSNP1168     | <i>Desi</i>      | Ca_Desig_Chr02               | 7659312                        | (G/T)       |

| <b>S.N.</b> | <b>SNP IDs</b> | <b>Cultivars</b> | <b>Chromosomes/scaffolds</b> | <b>Physical positions (bp)</b> | <b>SNPs</b> |
|-------------|----------------|------------------|------------------------------|--------------------------------|-------------|
| 25574       | CadSNP1169     | <i>Desi</i>      | Ca_Desig_Chr02               | 7659401                        | (C/T)       |
| 25575       | CadSNP1170     | <i>Desi</i>      | Ca_Desig_Chr02               | 7659625                        | (T/C)       |
| 25576       | CadSNP1171     | <i>Desi</i>      | Ca_Desig_Chr02               | 7675697                        | (A/G)       |
| 25577       | CadSNP1172     | <i>Desi</i>      | Ca_Desig_Chr02               | 7697803                        | (G/C)       |
| 25578       | CadSNP1173     | <i>Desi</i>      | Ca_Desig_Chr02               | 7708782                        | (G/A)       |
| 25579       | CadSNP1174     | <i>Desi</i>      | Ca_Desig_Chr02               | 7708761                        | (C/T)       |
| 25580       | CadSNP1175     | <i>Desi</i>      | Ca_Desig_Chr02               | 7708760                        | (A/C)       |
| 25581       | CadSNP1176     | <i>Desi</i>      | Ca_Desig_Chr02               | 7708749                        | (G/A)       |
| 25582       | CadSNP1177     | <i>Desi</i>      | Ca_Desig_Chr02               | 7708765                        | (A/C)       |
| 25583       | CadSNP1178     | <i>Desi</i>      | Ca_Desig_Chr02               | 7709532                        | (C/T)       |
| 25584       | CadSNP1179     | <i>Desi</i>      | Ca_Desig_Chr02               | 7709745                        | (A/G)       |
| 25585       | CadSNP1180     | <i>Desi</i>      | Ca_Desig_Chr02               | 7709743                        | (A/G)       |
| 25586       | CadSNP1181     | <i>Desi</i>      | Ca_Desig_Chr02               | 7728470                        | (C/G)       |
| 25587       | CadSNP1182     | <i>Desi</i>      | Ca_Desig_Chr02               | 7728474                        | (A/G)       |
| 25588       | CadSNP1183     | <i>Desi</i>      | Ca_Desig_Chr02               | 7813999                        | (C/A)       |
| 25589       | CadSNP1184     | <i>Desi</i>      | Ca_Desig_Chr02               | 7813998                        | (T/A)       |
| 25590       | CadSNP1185     | <i>Desi</i>      | Ca_Desig_Chr02               | 7869084                        | (A/C)       |
| 25591       | CadSNP1186     | <i>Desi</i>      | Ca_Desig_Chr02               | 7875419                        | (A/G)       |
| 25592       | CadSNP1187     | <i>Desi</i>      | Ca_Desig_Chr02               | 7894116                        | (C/T)       |
| 25593       | CadSNP1188     | <i>Desi</i>      | Ca_Desig_Chr02               | 7897881                        | (C/A)       |
| 25594       | CadSNP1189     | <i>Desi</i>      | Ca_Desig_Chr02               | 7944911                        | (T/C)       |
| 25595       | CadSNP1190     | <i>Desi</i>      | Ca_Desig_Chr02               | 7956738                        | (T/C)       |
| 25596       | CadSNP1191     | <i>Desi</i>      | Ca_Desig_Chr02               | 7958321                        | (A/C)       |
| 25597       | CadSNP1192     | <i>Desi</i>      | Ca_Desig_Chr02               | 7958494                        | (C/T)       |
| 25598       | CadSNP1193     | <i>Desi</i>      | Ca_Desig_Chr02               | 7958522                        | (A/G)       |
| 25599       | CadSNP1194     | <i>Desi</i>      | Ca_Desig_Chr02               | 7958529                        | (T/A)       |
| 25600       | CadSNP1195     | <i>Desi</i>      | Ca_Desig_Chr02               | 7960966                        | (A/T)       |
| 25601       | CadSNP1196     | <i>Desi</i>      | Ca_Desig_Chr02               | 8013247                        | (C/T)       |
| 25602       | CadSNP1197     | <i>Desi</i>      | Ca_Desig_Chr02               | 8037211                        | (C/A)       |
| 25603       | CadSNP1198     | <i>Desi</i>      | Ca_Desig_Chr02               | 8065988                        | (C/A)       |
| 25604       | CadSNP1199     | <i>Desi</i>      | Ca_Desig_Chr02               | 8073314                        | (G/A)       |
| 25605       | CadSNP1200     | <i>Desi</i>      | Ca_Desig_Chr02               | 8113745                        | (G/T)       |
| 25606       | CadSNP1201     | <i>Desi</i>      | Ca_Desig_Chr02               | 8113738                        | (C/T)       |
| 25607       | CadSNP1202     | <i>Desi</i>      | Ca_Desig_Chr02               | 8113723                        | (C/T)       |
| 25608       | CadSNP1203     | <i>Desi</i>      | Ca_Desig_Chr02               | 8113708                        | (T/G)       |
| 25609       | CadSNP1204     | <i>Desi</i>      | Ca_Desig_Chr02               | 8113696                        | (C/G)       |
| 25610       | CadSNP1205     | <i>Desi</i>      | Ca_Desig_Chr02               | 8149881                        | (T/G)       |
| 25611       | CadSNP1206     | <i>Desi</i>      | Ca_Desig_Chr02               | 8160645                        | (C/A)       |

| <b>S.N.</b> | <b>SNP IDs</b> | <b>Cultivars</b> | <b>Chromosomes/scaffolds</b> | <b>Physical positions (bp)</b> | <b>SNPs</b> |
|-------------|----------------|------------------|------------------------------|--------------------------------|-------------|
| 25612       | CadSNP1207     | <i>Desi</i>      | Ca_Desig_Chr02               | 8160750                        | (G/A)       |
| 25613       | CadSNP1208     | <i>Desi</i>      | Ca_Desig_Chr02               | 8160737                        | (A/C)       |
| 25614       | CadSNP1209     | <i>Desi</i>      | Ca_Desig_Chr02               | 8160733                        | (C/T)       |
| 25615       | CadSNP1210     | <i>Desi</i>      | Ca_Desig_Chr02               | 8167177                        | (A/C)       |
| 25616       | CadSNP1211     | <i>Desi</i>      | Ca_Desig_Chr02               | 8167702                        | (T/C)       |
| 25617       | CadSNP1212     | <i>Desi</i>      | Ca_Desig_Chr02               | 8167708                        | (C/T)       |
| 25618       | CadSNP1213     | <i>Desi</i>      | Ca_Desig_Chr02               | 8167709                        | (C/T)       |
| 25619       | CadSNP1214     | <i>Desi</i>      | Ca_Desig_Chr02               | 8167714                        | (A/G)       |
| 25620       | CadSNP1215     | <i>Desi</i>      | Ca_Desig_Chr02               | 8167719                        | (T/C)       |
| 25621       | CadSNP1216     | <i>Desi</i>      | Ca_Desig_Chr02               | 8167720                        | (G/A)       |
| 25622       | CadSNP1217     | <i>Desi</i>      | Ca_Desig_Chr02               | 8167721                        | (A/C)       |
| 25623       | CadSNP1218     | <i>Desi</i>      | Ca_Desig_Chr02               | 8167724                        | (C/T)       |
| 25624       | CadSNP1219     | <i>Desi</i>      | Ca_Desig_Chr02               | 8167729                        | (A/G)       |
| 25625       | CadSNP1220     | <i>Desi</i>      | Ca_Desig_Chr02               | 8167735                        | (G/A)       |
| 25626       | CadSNP1221     | <i>Desi</i>      | Ca_Desig_Chr02               | 8167740                        | (C/A)       |
| 25627       | CadSNP1222     | <i>Desi</i>      | Ca_Desig_Chr02               | 8167744                        | (G/A)       |
| 25628       | CadSNP1223     | <i>Desi</i>      | Ca_Desig_Chr02               | 8167753                        | (G/A)       |
| 25629       | CadSNP1224     | <i>Desi</i>      | Ca_Desig_Chr02               | 8167754                        | (A/T)       |
| 25630       | CadSNP1225     | <i>Desi</i>      | Ca_Desig_Chr02               | 8167759                        | (C/G)       |
| 25631       | CadSNP1226     | <i>Desi</i>      | Ca_Desig_Chr02               | 8167760                        | (C/G)       |
| 25632       | CadSNP1227     | <i>Desi</i>      | Ca_Desig_Chr02               | 8167764                        | (G/A)       |
| 25633       | CadSNP1228     | <i>Desi</i>      | Ca_Desig_Chr02               | 8174448                        | (G/A)       |
| 25634       | CadSNP1229     | <i>Desi</i>      | Ca_Desig_Chr02               | 8174458                        | (C/T)       |
| 25635       | CadSNP1230     | <i>Desi</i>      | Ca_Desig_Chr02               | 8234099                        | (A/C)       |
| 25636       | CadSNP1231     | <i>Desi</i>      | Ca_Desig_Chr02               | 8294583                        | (T/C)       |
| 25637       | CadSNP1232     | <i>Desi</i>      | Ca_Desig_Chr02               | 8294721                        | (C/A)       |
| 25638       | CadSNP1233     | <i>Desi</i>      | Ca_Desig_Chr02               | 8294715                        | (C/T)       |
| 25639       | CadSNP1234     | <i>Desi</i>      | Ca_Desig_Chr02               | 8294709                        | (C/T)       |
| 25640       | CadSNP1235     | <i>Desi</i>      | Ca_Desig_Chr02               | 8294706                        | (C/T)       |
| 25641       | CadSNP1236     | <i>Desi</i>      | Ca_Desig_Chr02               | 8303613                        | (G/A)       |
| 25642       | CadSNP1237     | <i>Desi</i>      | Ca_Desig_Chr02               | 8322723                        | (A/G)       |
| 25643       | CadSNP1238     | <i>Desi</i>      | Ca_Desig_Chr02               | 8322740                        | (G/A)       |
| 25644       | CadSNP1239     | <i>Desi</i>      | Ca_Desig_Chr02               | 8322763                        | (A/G)       |
| 25645       | CadSNP1240     | <i>Desi</i>      | Ca_Desig_Chr02               | 8397884                        | (A/G)       |
| 25646       | CadSNP1241     | <i>Desi</i>      | Ca_Desig_Chr02               | 8397955                        | (G/C)       |
| 25647       | CadSNP1242     | <i>Desi</i>      | Ca_Desig_Chr02               | 8528763                        | (G/A)       |
| 25648       | CadSNP1243     | <i>Desi</i>      | Ca_Desig_Chr02               | 8530649                        | (C/T)       |
| 25649       | CadSNP1244     | <i>Desi</i>      | Ca_Desig_Chr02               | 9840097                        | (G/A)       |

| <b>S.N.</b> | <b>SNP IDs</b> | <b>Cultivars</b> | <b>Chromosomes/scaffolds</b> | <b>Physical positions (bp)</b> | <b>SNPs</b> |
|-------------|----------------|------------------|------------------------------|--------------------------------|-------------|
| 25650       | CadSNP1245     | <i>Desi</i>      | Ca_Desig_Chr02               | 9840141                        | (C/T)       |
| 25651       | CadSNP1246     | <i>Desi</i>      | Ca_Desig_Chr02               | 9845051                        | (A/C)       |
| 25652       | CadSNP1247     | <i>Desi</i>      | Ca_Desig_Chr02               | 9861790                        | (A/T)       |
| 25653       | CadSNP1248     | <i>Desi</i>      | Ca_Desig_Chr02               | 9861771                        | (A/C)       |
| 25654       | CadSNP1249     | <i>Desi</i>      | Ca_Desig_Chr02               | 9864788                        | (G/T)       |
| 25655       | CadSNP1250     | <i>Desi</i>      | Ca_Desig_Chr02               | 9873103                        | (A/C)       |
| 25656       | CadSNP1251     | <i>Desi</i>      | Ca_Desig_Chr02               | 9873154                        | (C/T)       |
| 25657       | CadSNP1252     | <i>Desi</i>      | Ca_Desig_Chr02               | 9886040                        | (C/T)       |
| 25658       | CadSNP1253     | <i>Desi</i>      | Ca_Desig_Chr02               | 10091173                       | (T/C)       |
| 25659       | CadSNP1254     | <i>Desi</i>      | Ca_Desig_Chr02               | 10091208                       | (C/T)       |
| 25660       | CadSNP1255     | <i>Desi</i>      | Ca_Desig_Chr02               | 10091494                       | (T/C)       |
| 25661       | CadSNP1256     | <i>Desi</i>      | Ca_Desig_Chr02               | 10091528                       | (A/G)       |
| 25662       | CadSNP1257     | <i>Desi</i>      | Ca_Desig_Chr02               | 10091558                       | (A/G)       |
| 25663       | CadSNP1258     | <i>Desi</i>      | Ca_Desig_Chr02               | 10091566                       | (C/A)       |
| 25664       | CadSNP1259     | <i>Desi</i>      | Ca_Desig_Chr02               | 10208337                       | (T/G)       |
| 25665       | CadSNP1260     | <i>Desi</i>      | Ca_Desig_Chr02               | 10286615                       | (C/G)       |
| 25666       | CadSNP1261     | <i>Desi</i>      | Ca_Desig_Chr02               | 10436482                       | (C/T)       |
| 25667       | CadSNP1262     | <i>Desi</i>      | Ca_Desig_Chr02               | 10436528                       | (T/C)       |
| 25668       | CadSNP1263     | <i>Desi</i>      | Ca_Desig_Chr02               | 10436644                       | (G/T)       |
| 25669       | CadSNP1264     | <i>Desi</i>      | Ca_Desig_Chr02               | 10439843                       | (G/A)       |
| 25670       | CadSNP1265     | <i>Desi</i>      | Ca_Desig_Chr02               | 10864591                       | (G/A)       |
| 25671       | CadSNP1266     | <i>Desi</i>      | Ca_Desig_Chr02               | 10864593                       | (A/T)       |
| 25672       | CadSNP1267     | <i>Desi</i>      | Ca_Desig_Chr02               | 10864609                       | (G/A)       |
| 25673       | CadSNP1268     | <i>Desi</i>      | Ca_Desig_Chr02               | 10864621                       | (T/A)       |
| 25674       | CadSNP1269     | <i>Desi</i>      | Ca_Desig_Chr02               | 10864624                       | (C/T)       |
| 25675       | CadSNP1270     | <i>Desi</i>      | Ca_Desig_Chr02               | 10864631                       | (C/T)       |
| 25676       | CadSNP1271     | <i>Desi</i>      | Ca_Desig_Chr02               | 10864664                       | (A/G)       |
| 25677       | CadSNP1272     | <i>Desi</i>      | Ca_Desig_Chr02               | 10864728                       | (C/A)       |
| 25678       | CadSNP1273     | <i>Desi</i>      | Ca_Desig_Chr02               | 10864722                       | (T/C)       |
| 25679       | CadSNP1274     | <i>Desi</i>      | Ca_Desig_Chr02               | 10864699                       | (G/A)       |
| 25680       | CadSNP1275     | <i>Desi</i>      | Ca_Desig_Chr02               | 10864698                       | (G/A)       |
| 25681       | CadSNP1276     | <i>Desi</i>      | Ca_Desig_Chr02               | 11110650                       | (A/T)       |
| 25682       | CadSNP1277     | <i>Desi</i>      | Ca_Desig_Chr02               | 11110651                       | (T/C)       |
| 25683       | CadSNP1278     | <i>Desi</i>      | Ca_Desig_Chr02               | 11170269                       | (C/T)       |
| 25684       | CadSNP1279     | <i>Desi</i>      | Ca_Desig_Chr02               | 11268822                       | (C/T)       |
| 25685       | CadSNP1280     | <i>Desi</i>      | Ca_Desig_Chr02               | 11276069                       | (G/A)       |
| 25686       | CadSNP1281     | <i>Desi</i>      | Ca_Desig_Chr02               | 11393742                       | (A/G)       |
| 25687       | CadSNP1282     | <i>Desi</i>      | Ca_Desig_Chr02               | 11393800                       | (C/T)       |

| <b>S.N.</b> | <b>SNP IDs</b> | <b>Cultivars</b> | <b>Chromosomes/scaffolds</b> | <b>Physical positions (bp)</b> | <b>SNPs</b> |
|-------------|----------------|------------------|------------------------------|--------------------------------|-------------|
| 25688       | CadSNP1283     | <i>Desi</i>      | Ca_Desig_Chr02               | 11393824                       | (C/T)       |
| 25689       | CadSNP1284     | <i>Desi</i>      | Ca_Desig_Chr02               | 11393816                       | (G/A)       |
| 25690       | CadSNP1285     | <i>Desi</i>      | Ca_Desig_Chr02               | 11393862                       | (C/G)       |
| 25691       | CadSNP1286     | <i>Desi</i>      | Ca_Desig_Chr02               | 11394075                       | (A/G)       |
| 25692       | CadSNP1287     | <i>Desi</i>      | Ca_Desig_Chr02               | 11394066                       | (G/A)       |
| 25693       | CadSNP1288     | <i>Desi</i>      | Ca_Desig_Chr02               | 11394036                       | (T/C)       |
| 25694       | CadSNP1289     | <i>Desi</i>      | Ca_Desig_Chr02               | 11394024                       | (A/G)       |
| 25695       | CadSNP1290     | <i>Desi</i>      | Ca_Desig_Chr02               | 11394153                       | (T/C)       |
| 25696       | CadSNP1291     | <i>Desi</i>      | Ca_Desig_Chr02               | 11394247                       | (G/A)       |
| 25697       | CadSNP1292     | <i>Desi</i>      | Ca_Desig_Chr02               | 11403900                       | (C/A)       |
| 25698       | CadSNP1293     | <i>Desi</i>      | Ca_Desig_Chr02               | 11404024                       | (A/G)       |
| 25699       | CadSNP1294     | <i>Desi</i>      | Ca_Desig_Chr02               | 11403986                       | (C/T)       |
| 25700       | CadSNP1295     | <i>Desi</i>      | Ca_Desig_Chr02               | 11405477                       | (C/T)       |
| 25701       | CadSNP1296     | <i>Desi</i>      | Ca_Desig_Chr02               | 11422984                       | (G/A)       |
| 25702       | CadSNP1297     | <i>Desi</i>      | Ca_Desig_Chr02               | 11423000                       | (C/A)       |
| 25703       | CadSNP1298     | <i>Desi</i>      | Ca_Desig_Chr02               | 11423014                       | (G/A)       |
| 25704       | CadSNP1299     | <i>Desi</i>      | Ca_Desig_Chr02               | 11423022                       | (T/C)       |
| 25705       | CadSNP1300     | <i>Desi</i>      | Ca_Desig_Chr02               | 11423023                       | (C/T)       |
| 25706       | CadSNP1301     | <i>Desi</i>      | Ca_Desig_Chr02               | 11423041                       | (T/G)       |
| 25707       | CadSNP1302     | <i>Desi</i>      | Ca_Desig_Chr02               | 11423053                       | (T/C)       |
| 25708       | CadSNP1303     | <i>Desi</i>      | Ca_Desig_Chr02               | 11423165                       | (A/T)       |
| 25709       | CadSNP1304     | <i>Desi</i>      | Ca_Desig_Chr02               | 11423145                       | (A/G)       |
| 25710       | CadSNP1305     | <i>Desi</i>      | Ca_Desig_Chr02               | 11636237                       | (T/A)       |
| 25711       | CadSNP1306     | <i>Desi</i>      | Ca_Desig_Chr02               | 11636243                       | (C/G)       |
| 25712       | CadSNP1307     | <i>Desi</i>      | Ca_Desig_Chr02               | 11636275                       | (C/T)       |
| 25713       | CadSNP1308     | <i>Desi</i>      | Ca_Desig_Chr02               | 11636378                       | (A/C)       |
| 25714       | CadSNP1309     | <i>Desi</i>      | Ca_Desig_Chr02               | 11636495                       | (T/C)       |
| 25715       | CadSNP1310     | <i>Desi</i>      | Ca_Desig_Chr02               | 11957822                       | (A/G)       |
| 25716       | CadSNP1311     | <i>Desi</i>      | Ca_Desig_Chr02               | 11957812                       | (C/T)       |
| 25717       | CadSNP1312     | <i>Desi</i>      | Ca_Desig_Chr02               | 11957805                       | (C/A)       |
| 25718       | CadSNP1313     | <i>Desi</i>      | Ca_Desig_Chr02               | 11957800                       | (T/C)       |
| 25719       | CadSNP1314     | <i>Desi</i>      | Ca_Desig_Chr02               | 11957789                       | (G/T)       |
| 25720       | CadSNP1315     | <i>Desi</i>      | Ca_Desig_Chr02               | 11957784                       | (T/C)       |
| 25721       | CadSNP1316     | <i>Desi</i>      | Ca_Desig_Chr02               | 11984016                       | (C/T)       |
| 25722       | CadSNP1317     | <i>Desi</i>      | Ca_Desig_Chr02               | 11985665                       | (A/C)       |
| 25723       | CadSNP1318     | <i>Desi</i>      | Ca_Desig_Chr02               | 11992316                       | (A/G)       |
| 25724       | CadSNP1319     | <i>Desi</i>      | Ca_Desig_Chr02               | 12071159                       | (T/C)       |
| 25725       | CadSNP1320     | <i>Desi</i>      | Ca_Desig_Chr02               | 12071213                       | (G/A)       |

| <b>S.N.</b> | <b>SNP IDs</b> | <b>Cultivars</b> | <b>Chromosomes/scaffolds</b> | <b>Physical positions (bp)</b> | <b>SNPs</b> |
|-------------|----------------|------------------|------------------------------|--------------------------------|-------------|
| 25726       | CadSNP1321     | <i>Desi</i>      | Ca_Desig_Chr02               | 12072110                       | (A/C)       |
| 25727       | CadSNP1322     | <i>Desi</i>      | Ca_Desig_Chr02               | 12357679                       | (A/G)       |
| 25728       | CadSNP1323     | <i>Desi</i>      | Ca_Desig_Chr02               | 12462629                       | (C/T)       |
| 25729       | CadSNP1324     | <i>Desi</i>      | Ca_Desig_Chr02               | 12462654                       | (G/T)       |
| 25730       | CadSNP1325     | <i>Desi</i>      | Ca_Desig_Chr02               | 12490110                       | (G/C)       |
| 25731       | CadSNP1326     | <i>Desi</i>      | Ca_Desig_Chr02               | 12490080                       | (A/G)       |
| 25732       | CadSNP1327     | <i>Desi</i>      | Ca_Desig_Chr02               | 12490043                       | (G/A)       |
| 25733       | CadSNP1328     | <i>Desi</i>      | Ca_Desig_Chr02               | 12518521                       | (G/T)       |
| 25734       | CadSNP1329     | <i>Desi</i>      | Ca_Desig_Chr02               | 12560789                       | (T/G)       |
| 25735       | CadSNP1330     | <i>Desi</i>      | Ca_Desig_Chr02               | 12726887                       | (A/G)       |
| 25736       | CadSNP1331     | <i>Desi</i>      | Ca_Desig_Chr02               | 12729502                       | (C/T)       |
| 25737       | CadSNP1332     | <i>Desi</i>      | Ca_Desig_Chr02               | 12737222                       | (G/T)       |
| 25738       | CadSNP1333     | <i>Desi</i>      | Ca_Desig_Chr02               | 12760068                       | (C/T)       |
| 25739       | CadSNP1334     | <i>Desi</i>      | Ca_Desig_Chr02               | 12797455                       | (A/T)       |
| 25740       | CadSNP1335     | <i>Desi</i>      | Ca_Desig_Chr02               | 12802226                       | (C/A)       |
| 25741       | CadSNP1336     | <i>Desi</i>      | Ca_Desig_Chr02               | 12802223                       | (T/C)       |
| 25742       | CadSNP1337     | <i>Desi</i>      | Ca_Desig_Chr02               | 12802202                       | (G/T)       |
| 25743       | CadSNP1338     | <i>Desi</i>      | Ca_Desig_Chr02               | 12827722                       | (C/T)       |
| 25744       | CadSNP1339     | <i>Desi</i>      | Ca_Desig_Chr02               | 12827705                       | (A/G)       |
| 25745       | CadSNP1340     | <i>Desi</i>      | Ca_Desig_Chr02               | 12830428                       | (A/C)       |
| 25746       | CadSNP1341     | <i>Desi</i>      | Ca_Desig_Chr02               | 12985136                       | (G/A)       |
| 25747       | CadSNP1342     | <i>Desi</i>      | Ca_Desig_Chr02               | 13036994                       | (G/C)       |
| 25748       | CadSNP1343     | <i>Desi</i>      | Ca_Desig_Chr02               | 13036951                       | (A/C)       |
| 25749       | CadSNP1344     | <i>Desi</i>      | Ca_Desig_Chr02               | 13039200                       | (T/C)       |
| 25750       | CadSNP1345     | <i>Desi</i>      | Ca_Desig_Chr02               | 13039869                       | (C/G)       |
| 25751       | CadSNP1346     | <i>Desi</i>      | Ca_Desig_Chr02               | 13040155                       | (C/T)       |
| 25752       | CadSNP1347     | <i>Desi</i>      | Ca_Desig_Chr02               | 13100484                       | (A/C)       |
| 25753       | CadSNP1348     | <i>Desi</i>      | Ca_Desig_Chr02               | 13122853                       | (T/G)       |
| 25754       | CadSNP1349     | <i>Desi</i>      | Ca_Desig_Chr02               | 13127113                       | (T/G)       |
| 25755       | CadSNP1350     | <i>Desi</i>      | Ca_Desig_Chr02               | 13147204                       | (A/T)       |
| 25756       | CadSNP1351     | <i>Desi</i>      | Ca_Desig_Chr02               | 13162836                       | (T/C)       |
| 25757       | CadSNP1352     | <i>Desi</i>      | Ca_Desig_Chr02               | 13162848                       | (G/C)       |
| 25758       | CadSNP1353     | <i>Desi</i>      | Ca_Desig_Chr02               | 13178463                       | (T/C)       |
| 25759       | CadSNP1354     | <i>Desi</i>      | Ca_Desig_Chr02               | 13260498                       | (G/A)       |
| 25760       | CadSNP1355     | <i>Desi</i>      | Ca_Desig_Chr02               | 13331702                       | (A/G)       |
| 25761       | CadSNP1356     | <i>Desi</i>      | Ca_Desig_Chr02               | 13379964                       | (A/T)       |
| 25762       | CadSNP1357     | <i>Desi</i>      | Ca_Desig_Chr02               | 13421370                       | (C/T)       |
| 25763       | CadSNP1358     | <i>Desi</i>      | Ca_Desig_Chr02               | 13572362                       | (G/A)       |



| <b>S.N.</b> | <b>SNP IDs</b> | <b>Cultivars</b> | <b>Chromosomes/scaffolds</b> | <b>Physical positions (bp)</b> | <b>SNPs</b> |
|-------------|----------------|------------------|------------------------------|--------------------------------|-------------|
| 25764       | CadSNP1359     | <i>Desi</i>      | Ca_Desig_Chr02               | 13840468                       | (T/G)       |
| 25765       | CadSNP1360     | <i>Desi</i>      | Ca_Desig_Chr02               | 13840749                       | (T/A)       |
| 25766       | CadSNP1361     | <i>Desi</i>      | Ca_Desig_Chr02               | 13900392                       | (A/G)       |
| 25767       | CadSNP1362     | <i>Desi</i>      | Ca_Desig_Chr02               | 13924598                       | (A/C)       |
| 25768       | CadSNP1363     | <i>Desi</i>      | Ca_Desig_Chr02               | 13924579                       | (A/T)       |
| 25769       | CadSNP1364     | <i>Desi</i>      | Ca_Desig_Chr02               | 14061466                       | (T/C)       |
| 25770       | CadSNP1365     | <i>Desi</i>      | Ca_Desig_Chr02               | 14064995                       | (G/T)       |
| 25771       | CadSNP1366     | <i>Desi</i>      | Ca_Desig_Chr02               | 14163542                       | (A/C)       |
| 25772       | CadSNP1367     | <i>Desi</i>      | Ca_Desig_Chr02               | 14163647                       | (C/T)       |
| 25773       | CadSNP1368     | <i>Desi</i>      | Ca_Desig_Chr02               | 14209016                       | (A/G)       |
| 25774       | CadSNP1369     | <i>Desi</i>      | Ca_Desig_Chr02               | 14215276                       | (G/A)       |
| 25775       | CadSNP1370     | <i>Desi</i>      | Ca_Desig_Chr02               | 14215293                       | (G/C)       |
| 25776       | CadSNP1371     | <i>Desi</i>      | Ca_Desig_Chr02               | 14215344                       | (A/T)       |
| 25777       | CadSNP1372     | <i>Desi</i>      | Ca_Desig_Chr02               | 14215466                       | (T/C)       |
| 25778       | CadSNP1373     | <i>Desi</i>      | Ca_Desig_Chr02               | 14215453                       | (A/T)       |
| 25779       | CadSNP1374     | <i>Desi</i>      | Ca_Desig_Chr02               | 14453533                       | (T/C)       |
| 25780       | CadSNP1375     | <i>Desi</i>      | Ca_Desig_Chr02               | 14453917                       | (T/C)       |
| 25781       | CadSNP1376     | <i>Desi</i>      | Ca_Desig_Chr02               | 14463390                       | (T/A)       |
| 25782       | CadSNP1377     | <i>Desi</i>      | Ca_Desig_Chr02               | 14474102                       | (C/T)       |
| 25783       | CadSNP1378     | <i>Desi</i>      | Ca_Desig_Chr02               | 14474157                       | (T/A)       |
| 25784       | CadSNP1379     | <i>Desi</i>      | Ca_Desig_Chr02               | 14474167                       | (A/T)       |
| 25785       | CadSNP1380     | <i>Desi</i>      | Ca_Desig_Chr02               | 14492206                       | (T/C)       |
| 25786       | CadSNP1381     | <i>Desi</i>      | Ca_Desig_Chr02               | 14492207                       | (A/G)       |
| 25787       | CadSNP1382     | <i>Desi</i>      | Ca_Desig_Chr02               | 14492297                       | (T/C)       |
| 25788       | CadSNP1383     | <i>Desi</i>      | Ca_Desig_Chr02               | 14493784                       | (T/A)       |
| 25789       | CadSNP1384     | <i>Desi</i>      | Ca_Desig_Chr02               | 14510462                       | (G/T)       |
| 25790       | CadSNP1385     | <i>Desi</i>      | Ca_Desig_Chr02               | 14510458                       | (C/A)       |
| 25791       | CadSNP1386     | <i>Desi</i>      | Ca_Desig_Chr02               | 14577347                       | (G/A)       |
| 25792       | CadSNP1387     | <i>Desi</i>      | Ca_Desig_Chr02               | 14577488                       | (C/T)       |
| 25793       | CadSNP1388     | <i>Desi</i>      | Ca_Desig_Chr02               | 14729007                       | (T/A)       |
| 25794       | CadSNP1389     | <i>Desi</i>      | Ca_Desig_Chr02               | 14765296                       | (T/C)       |
| 25795       | CadSNP1390     | <i>Desi</i>      | Ca_Desig_Chr02               | 14766612                       | (T/G)       |
| 25796       | CadSNP1391     | <i>Desi</i>      | Ca_Desig_Chr02               | 14766747                       | (G/A)       |
| 25797       | CadSNP1392     | <i>Desi</i>      | Ca_Desig_Chr02               | 14766780                       | (C/T)       |
| 25798       | CadSNP1393     | <i>Desi</i>      | Ca_Desig_Chr02               | 14784192                       | (C/T)       |
| 25799       | CadSNP1394     | <i>Desi</i>      | Ca_Desig_Chr02               | 14784195                       | (A/G)       |
| 25800       | CadSNP1395     | <i>Desi</i>      | Ca_Desig_Chr02               | 14784208                       | (G/C)       |
| 25801       | CadSNP1396     | <i>Desi</i>      | Ca_Desig_Chr02               | 14784243                       | (A/G)       |

| <b>S.N.</b> | <b>SNP IDs</b> | <b>Cultivars</b> | <b>Chromosomes/scaffolds</b> | <b>Physical positions (bp)</b> | <b>SNPs</b> |
|-------------|----------------|------------------|------------------------------|--------------------------------|-------------|
| 25802       | CadSNP1397     | <i>Desi</i>      | Ca_Desig_Chr02               | 14784247                       | (G/T)       |
| 25803       | CadSNP1398     | <i>Desi</i>      | Ca_Desig_Chr02               | 14811203                       | (A/G)       |
| 25804       | CadSNP1399     | <i>Desi</i>      | Ca_Desig_Chr02               | 14861116                       | (A/C)       |
| 25805       | CadSNP1400     | <i>Desi</i>      | Ca_Desig_Chr02               | 14861159                       | (T/G)       |
| 25806       | CadSNP1401     | <i>Desi</i>      | Ca_Desig_Chr02               | 14978631                       | (T/C)       |
| 25807       | CadSNP1402     | <i>Desi</i>      | Ca_Desig_Chr02               | 14978653                       | (C/T)       |
| 25808       | CadSNP1403     | <i>Desi</i>      | Ca_Desig_Chr02               | 15006255                       | (C/A)       |
| 25809       | CadSNP1404     | <i>Desi</i>      | Ca_Desig_Chr02               | 15006256                       | (G/T)       |
| 25810       | CadSNP1405     | <i>Desi</i>      | Ca_Desig_Chr02               | 15014922                       | (C/T)       |
| 25811       | CadSNP1406     | <i>Desi</i>      | Ca_Desig_Chr02               | 15222856                       | (C/T)       |
| 25812       | CadSNP1407     | <i>Desi</i>      | Ca_Desig_Chr02               | 15279307                       | (A/G)       |
| 25813       | CadSNP1408     | <i>Desi</i>      | Ca_Desig_Chr02               | 15284031                       | (T/A)       |
| 25814       | CadSNP1409     | <i>Desi</i>      | Ca_Desig_Chr02               | 15313773                       | (A/G)       |
| 25815       | CadSNP1410     | <i>Desi</i>      | Ca_Desig_Chr02               | 15318170                       | (C/T)       |
| 25816       | CadSNP1411     | <i>Desi</i>      | Ca_Desig_Chr02               | 15318202                       | (A/G)       |
| 25817       | CadSNP1412     | <i>Desi</i>      | Ca_Desig_Chr02               | 15391794                       | (T/C)       |
| 25818       | CadSNP1413     | <i>Desi</i>      | Ca_Desig_Chr02               | 15392614                       | (C/T)       |
| 25819       | CadSNP1414     | <i>Desi</i>      | Ca_Desig_Chr02               | 15392855                       | (T/G)       |
| 25820       | CadSNP1415     | <i>Desi</i>      | Ca_Desig_Chr02               | 15427877                       | (G/A)       |
| 25821       | CadSNP1416     | <i>Desi</i>      | Ca_Desig_Chr02               | 15438733                       | (A/C)       |
| 25822       | CadSNP1417     | <i>Desi</i>      | Ca_Desig_Chr02               | 15470642                       | (C/T)       |
| 25823       | CadSNP1418     | <i>Desi</i>      | Ca_Desig_Chr02               | 15488586                       | (G/A)       |
| 25824       | CadSNP1419     | <i>Desi</i>      | Ca_Desig_Chr02               | 15488553                       | (C/T)       |
| 25825       | CadSNP1420     | <i>Desi</i>      | Ca_Desig_Chr02               | 15502293                       | (T/C)       |
| 25826       | CadSNP1421     | <i>Desi</i>      | Ca_Desig_Chr02               | 15510668                       | (C/A)       |
| 25827       | CadSNP1422     | <i>Desi</i>      | Ca_Desig_Chr02               | 15510675                       | (G/A)       |
| 25828       | CadSNP1423     | <i>Desi</i>      | Ca_Desig_Chr02               | 15526715                       | (G/T)       |
| 25829       | CadSNP1424     | <i>Desi</i>      | Ca_Desig_Chr02               | 15526673                       | (G/A)       |
| 25830       | CadSNP1425     | <i>Desi</i>      | Ca_Desig_Chr02               | 15526670                       | (C/T)       |
| 25831       | CadSNP1426     | <i>Desi</i>      | Ca_Desig_Chr02               | 15551741                       | (T/C)       |
| 25832       | CadSNP1427     | <i>Desi</i>      | Ca_Desig_Chr02               | 15551733                       | (A/G)       |
| 25833       | CadSNP1428     | <i>Desi</i>      | Ca_Desig_Chr02               | 15575093                       | (A/G)       |
| 25834       | CadSNP1429     | <i>Desi</i>      | Ca_Desig_Chr02               | 15575141                       | (A/G)       |
| 25835       | CadSNP1430     | <i>Desi</i>      | Ca_Desig_Chr02               | 15627570                       | (T/G)       |
| 25836       | CadSNP1431     | <i>Desi</i>      | Ca_Desig_Chr02               | 15653215                       | (A/T)       |
| 25837       | CadSNP1432     | <i>Desi</i>      | Ca_Desig_Chr02               | 15656951                       | (C/T)       |
| 25838       | CadSNP1433     | <i>Desi</i>      | Ca_Desig_Chr02               | 15671766                       | (C/A)       |
| 25839       | CadSNP1434     | <i>Desi</i>      | Ca_Desig_Chr02               | 15677639                       | (C/T)       |

| <b>S.N.</b> | <b>SNP IDs</b> | <b>Cultivars</b> | <b>Chromosomes/scaffolds</b> | <b>Physical positions (bp)</b> | <b>SNPs</b> |
|-------------|----------------|------------------|------------------------------|--------------------------------|-------------|
| 25840       | CadSNP1435     | <i>Desi</i>      | Ca_Desig_Chr02               | 15757574                       | (T/A)       |
| 25841       | CadSNP1436     | <i>Desi</i>      | Ca_Desig_Chr02               | 15769880                       | (A/T)       |
| 25842       | CadSNP1437     | <i>Desi</i>      | Ca_Desig_Chr02               | 15769883                       | (A/C)       |
| 25843       | CadSNP1438     | <i>Desi</i>      | Ca_Desig_Chr02               | 15772497                       | (G/A)       |
| 25844       | CadSNP1439     | <i>Desi</i>      | Ca_Desig_Chr02               | 15786439                       | (G/A)       |
| 25845       | CadSNP1440     | <i>Desi</i>      | Ca_Desig_Chr02               | 15874395                       | (A/G)       |
| 25846       | CadSNP1441     | <i>Desi</i>      | Ca_Desig_Chr02               | 15878454                       | (C/A)       |
| 25847       | CadSNP1442     | <i>Desi</i>      | Ca_Desig_Chr02               | 15878469                       | (C/A)       |
| 25848       | CadSNP1443     | <i>Desi</i>      | Ca_Desig_Chr02               | 15878472                       | (A/T)       |
| 25849       | CadSNP1444     | <i>Desi</i>      | Ca_Desig_Chr02               | 15878509                       | (A/T)       |
| 25850       | CadSNP1445     | <i>Desi</i>      | Ca_Desig_Chr02               | 15905306                       | (T/C)       |
| 25851       | CadSNP1446     | <i>Desi</i>      | Ca_Desig_Chr02               | 15905388                       | (T/A)       |
| 25852       | CadSNP1447     | <i>Desi</i>      | Ca_Desig_Chr02               | 15959857                       | (A/G)       |
| 25853       | CadSNP1448     | <i>Desi</i>      | Ca_Desig_Chr02               | 15970026                       | (C/G)       |
| 25854       | CadSNP1449     | <i>Desi</i>      | Ca_Desig_Chr02               | 15970055                       | (T/C)       |
| 25855       | CadSNP1450     | <i>Desi</i>      | Ca_Desig_Chr02               | 15970076                       | (A/T)       |
| 25856       | CadSNP1451     | <i>Desi</i>      | Ca_Desig_Chr02               | 15970077                       | (A/G)       |
| 25857       | CadSNP1452     | <i>Desi</i>      | Ca_Desig_Chr02               | 15970117                       | (A/G)       |
| 25858       | CadSNP1453     | <i>Desi</i>      | Ca_Desig_Chr02               | 15970114                       | (A/G)       |
| 25859       | CadSNP1454     | <i>Desi</i>      | Ca_Desig_Chr02               | 16066784                       | (G/A)       |
| 25860       | CadSNP1455     | <i>Desi</i>      | Ca_Desig_Chr02               | 16066788                       | (C/T)       |
| 25861       | CadSNP1456     | <i>Desi</i>      | Ca_Desig_Chr02               | 16113340                       | (C/A)       |
| 25862       | CadSNP1457     | <i>Desi</i>      | Ca_Desig_Chr02               | 16114802                       | (T/C)       |
| 25863       | CadSNP1458     | <i>Desi</i>      | Ca_Desig_Chr02               | 16114821                       | (A/T)       |
| 25864       | CadSNP1459     | <i>Desi</i>      | Ca_Desig_Chr02               | 16116122                       | (C/G)       |
| 25865       | CadSNP1460     | <i>Desi</i>      | Ca_Desig_Chr02               | 16130330                       | (A/G)       |
| 25866       | CadSNP1461     | <i>Desi</i>      | Ca_Desig_Chr02               | 16136692                       | (A/T)       |
| 25867       | CadSNP1462     | <i>Desi</i>      | Ca_Desig_Chr02               | 16136703                       | (T/C)       |
| 25868       | CadSNP1463     | <i>Desi</i>      | Ca_Desig_Chr02               | 16136908                       | (C/T)       |
| 25869       | CadSNP1464     | <i>Desi</i>      | Ca_Desig_Chr02               | 16137005                       | (C/T)       |
| 25870       | CadSNP1465     | <i>Desi</i>      | Ca_Desig_Chr02               | 16138793                       | (T/C)       |
| 25871       | CadSNP1466     | <i>Desi</i>      | Ca_Desig_Chr02               | 16138943                       | (A/C)       |
| 25872       | CadSNP1467     | <i>Desi</i>      | Ca_Desig_Chr02               | 16140958                       | (A/C)       |
| 25873       | CadSNP1468     | <i>Desi</i>      | Ca_Desig_Chr02               | 16157597                       | (A/C)       |
| 25874       | CadSNP1469     | <i>Desi</i>      | Ca_Desig_Chr02               | 16172626                       | (G/A)       |
| 25875       | CadSNP1470     | <i>Desi</i>      | Ca_Desig_Chr02               | 16172603                       | (A/G)       |
| 25876       | CadSNP1471     | <i>Desi</i>      | Ca_Desig_Chr02               | 16310713                       | (C/G)       |
| 25877       | CadSNP1472     | <i>Desi</i>      | Ca_Desig_Chr02               | 16637277                       | (T/G)       |

| <b>S.N.</b> | <b>SNP IDs</b> | <b>Cultivars</b> | <b>Chromosomes/scaffolds</b> | <b>Physical positions (bp)</b> | <b>SNPs</b> |
|-------------|----------------|------------------|------------------------------|--------------------------------|-------------|
| 25878       | CadSNP1473     | <i>Desi</i>      | Ca_Desig_Chr02               | 16689981                       | (C/T)       |
| 25879       | CadSNP1474     | <i>Desi</i>      | Ca_Desig_Chr02               | 16690001                       | (T/G)       |
| 25880       | CadSNP1475     | <i>Desi</i>      | Ca_Desig_Chr02               | 16690008                       | (C/T)       |
| 25881       | CadSNP1476     | <i>Desi</i>      | Ca_Desig_Chr02               | 16690011                       | (A/T)       |
| 25882       | CadSNP1477     | <i>Desi</i>      | Ca_Desig_Chr02               | 16690097                       | (G/A)       |
| 25883       | CadSNP1478     | <i>Desi</i>      | Ca_Desig_Chr02               | 16712209                       | (A/G)       |
| 25884       | CadSNP1479     | <i>Desi</i>      | Ca_Desig_Chr02               | 16741302                       | (C/T)       |
| 25885       | CadSNP1480     | <i>Desi</i>      | Ca_Desig_Chr02               | 16741251                       | (C/T)       |
| 25886       | CadSNP1481     | <i>Desi</i>      | Ca_Desig_Chr02               | 16741238                       | (G/T)       |
| 25887       | CadSNP1482     | <i>Desi</i>      | Ca_Desig_Chr02               | 16748554                       | (G/T)       |
| 25888       | CadSNP1483     | <i>Desi</i>      | Ca_Desig_Chr02               | 16748556                       | (T/G)       |
| 25889       | CadSNP1484     | <i>Desi</i>      | Ca_Desig_Chr02               | 16748700                       | (G/A)       |
| 25890       | CadSNP1485     | <i>Desi</i>      | Ca_Desig_Chr02               | 16748679                       | (T/A)       |
| 25891       | CadSNP1486     | <i>Desi</i>      | Ca_Desig_Chr02               | 16748726                       | (T/A)       |
| 25892       | CadSNP1487     | <i>Desi</i>      | Ca_Desig_Chr02               | 16748758                       | (C/A)       |
| 25893       | CadSNP1488     | <i>Desi</i>      | Ca_Desig_Chr02               | 16748779                       | (T/A)       |
| 25894       | CadSNP1489     | <i>Desi</i>      | Ca_Desig_Chr02               | 16748803                       | (T/G)       |
| 25895       | CadSNP1490     | <i>Desi</i>      | Ca_Desig_Chr02               | 16838445                       | (C/G)       |
| 25896       | CadSNP1491     | <i>Desi</i>      | Ca_Desig_Chr02               | 16856357                       | (A/C)       |
| 25897       | CadSNP1492     | <i>Desi</i>      | Ca_Desig_Chr02               | 16872692                       | (T/G)       |
| 25898       | CadSNP1493     | <i>Desi</i>      | Ca_Desig_Chr02               | 16872691                       | (A/T)       |
| 25899       | CadSNP1494     | <i>Desi</i>      | Ca_Desig_Chr02               | 16872685                       | (A/G)       |
| 25900       | CadSNP1495     | <i>Desi</i>      | Ca_Desig_Chr02               | 16872684                       | (A/T)       |
| 25901       | CadSNP1496     | <i>Desi</i>      | Ca_Desig_Chr02               | 16872680                       | (T/A)       |
| 25902       | CadSNP1497     | <i>Desi</i>      | Ca_Desig_Chr02               | 16872674                       | (T/C)       |
| 25903       | CadSNP1498     | <i>Desi</i>      | Ca_Desig_Chr02               | 16872671                       | (A/G)       |
| 25904       | CadSNP1499     | <i>Desi</i>      | Ca_Desig_Chr02               | 16872665                       | (T/A)       |
| 25905       | CadSNP1500     | <i>Desi</i>      | Ca_Desig_Chr02               | 16872659                       | (T/C)       |
| 25906       | CadSNP1501     | <i>Desi</i>      | Ca_Desig_Chr02               | 16872657                       | (C/T)       |
| 25907       | CadSNP1502     | <i>Desi</i>      | Ca_Desig_Chr02               | 16872653                       | (C/T)       |
| 25908       | CadSNP1503     | <i>Desi</i>      | Ca_Desig_Chr02               | 16954914                       | (G/A)       |
| 25909       | CadSNP1504     | <i>Desi</i>      | Ca_Desig_Chr02               | 17060800                       | (T/C)       |
| 25910       | CadSNP1505     | <i>Desi</i>      | Ca_Desig_Chr02               | 17063464                       | (G/C)       |
| 25911       | CadSNP1506     | <i>Desi</i>      | Ca_Desig_Chr02               | 17063468                       | (T/C)       |
| 25912       | CadSNP1507     | <i>Desi</i>      | Ca_Desig_Chr02               | 17167481                       | (A/G)       |
| 25913       | CadSNP1508     | <i>Desi</i>      | Ca_Desig_Chr02               | 17184026                       | (C/T)       |
| 25914       | CadSNP1509     | <i>Desi</i>      | Ca_Desig_Chr02               | 17187208                       | (T/C)       |
| 25915       | CadSNP1510     | <i>Desi</i>      | Ca_Desig_Chr02               | 17187245                       | (G/C)       |

| <b>S.N.</b> | <b>SNP IDs</b> | <b>Cultivars</b> | <b>Chromosomes/scaffolds</b> | <b>Physical positions (bp)</b> | <b>SNPs</b> |
|-------------|----------------|------------------|------------------------------|--------------------------------|-------------|
| 25916       | CadSNP1511     | <i>Desi</i>      | Ca_Desig_Chr02               | 17187980                       | (C/A)       |
| 25917       | CadSNP1512     | <i>Desi</i>      | Ca_Desig_Chr03               | 44873                          | (T/G)       |
| 25918       | CadSNP1513     | <i>Desi</i>      | Ca_Desig_Chr03               | 44877                          | (T/C)       |
| 25919       | CadSNP1514     | <i>Desi</i>      | Ca_Desig_Chr03               | 45008                          | (C/T)       |
| 25920       | CadSNP1515     | <i>Desi</i>      | Ca_Desig_Chr03               | 45009                          | (C/A)       |
| 25921       | CadSNP1516     | <i>Desi</i>      | Ca_Desig_Chr03               | 45013                          | (G/A)       |
| 25922       | CadSNP1517     | <i>Desi</i>      | Ca_Desig_Chr03               | 76445                          | (G/A)       |
| 25923       | CadSNP1518     | <i>Desi</i>      | Ca_Desig_Chr03               | 80216                          | (A/C)       |
| 25924       | CadSNP1519     | <i>Desi</i>      | Ca_Desig_Chr03               | 126485                         | (T/G)       |
| 25925       | CadSNP1520     | <i>Desi</i>      | Ca_Desig_Chr03               | 126527                         | (C/T)       |
| 25926       | CadSNP1521     | <i>Desi</i>      | Ca_Desig_Chr03               | 126619                         | (G/A)       |
| 25927       | CadSNP1522     | <i>Desi</i>      | Ca_Desig_Chr03               | 335668                         | (T/C)       |
| 25928       | CadSNP1523     | <i>Desi</i>      | Ca_Desig_Chr03               | 347892                         | (C/T)       |
| 25929       | CadSNP1524     | <i>Desi</i>      | Ca_Desig_Chr03               | 347865                         | (C/A)       |
| 25930       | CadSNP1525     | <i>Desi</i>      | Ca_Desig_Chr03               | 645024                         | (A/C)       |
| 25931       | CadSNP1526     | <i>Desi</i>      | Ca_Desig_Chr03               | 669270                         | (C/T)       |
| 25932       | CadSNP1527     | <i>Desi</i>      | Ca_Desig_Chr03               | 684601                         | (T/C)       |
| 25933       | CadSNP1528     | <i>Desi</i>      | Ca_Desig_Chr03               | 684572                         | (G/A)       |
| 25934       | CadSNP1529     | <i>Desi</i>      | Ca_Desig_Chr03               | 690339                         | (G/A)       |
| 25935       | CadSNP1530     | <i>Desi</i>      | Ca_Desig_Chr03               | 690372                         | (G/C)       |
| 25936       | CadSNP1531     | <i>Desi</i>      | Ca_Desig_Chr03               | 691472                         | (C/T)       |
| 25937       | CadSNP1532     | <i>Desi</i>      | Ca_Desig_Chr03               | 693294                         | (G/A)       |
| 25938       | CadSNP1533     | <i>Desi</i>      | Ca_Desig_Chr03               | 695497                         | (C/T)       |
| 25939       | CadSNP1534     | <i>Desi</i>      | Ca_Desig_Chr03               | 695494                         | (T/A)       |
| 25940       | CadSNP1535     | <i>Desi</i>      | Ca_Desig_Chr03               | 697967                         | (T/G)       |
| 25941       | CadSNP1536     | <i>Desi</i>      | Ca_Desig_Chr03               | 698068                         | (G/A)       |
| 25942       | CadSNP1537     | <i>Desi</i>      | Ca_Desig_Chr03               | 698170                         | (T/G)       |
| 25943       | CadSNP1538     | <i>Desi</i>      | Ca_Desig_Chr03               | 753812                         | (T/G)       |
| 25944       | CadSNP1539     | <i>Desi</i>      | Ca_Desig_Chr03               | 762935                         | (G/A)       |
| 25945       | CadSNP1540     | <i>Desi</i>      | Ca_Desig_Chr03               | 768344                         | (G/A)       |
| 25946       | CadSNP1541     | <i>Desi</i>      | Ca_Desig_Chr03               | 768325                         | (C/G)       |
| 25947       | CadSNP1542     | <i>Desi</i>      | Ca_Desig_Chr03               | 768323                         | (A/T)       |
| 25948       | CadSNP1543     | <i>Desi</i>      | Ca_Desig_Chr03               | 782934                         | (C/T)       |
| 25949       | CadSNP1544     | <i>Desi</i>      | Ca_Desig_Chr03               | 786406                         | (A/G)       |
| 25950       | CadSNP1545     | <i>Desi</i>      | Ca_Desig_Chr03               | 854698                         | (C/T)       |
| 25951       | CadSNP1546     | <i>Desi</i>      | Ca_Desig_Chr03               | 954899                         | (T/C)       |
| 25952       | CadSNP1547     | <i>Desi</i>      | Ca_Desig_Chr03               | 993205                         | (A/G)       |
| 25953       | CadSNP1548     | <i>Desi</i>      | Ca_Desig_Chr03               | 993204                         | (G/A)       |

| <b>S.N.</b> | <b>SNP IDs</b> | <b>Cultivars</b> | <b>Chromosomes/scaffolds</b> | <b>Physical positions (bp)</b> | <b>SNPs</b> |
|-------------|----------------|------------------|------------------------------|--------------------------------|-------------|
| 25954       | CadSNP1549     | <i>Desi</i>      | Ca_Desig_Chr03               | 993159                         | (C/T)       |
| 25955       | CadSNP1550     | <i>Desi</i>      | Ca_Desig_Chr03               | 1000520                        | (T/G)       |
| 25956       | CadSNP1551     | <i>Desi</i>      | Ca_Desig_Chr03               | 1001326                        | (A/G)       |
| 25957       | CadSNP1552     | <i>Desi</i>      | Ca_Desig_Chr03               | 1006408                        | (C/T)       |
| 25958       | CadSNP1553     | <i>Desi</i>      | Ca_Desig_Chr03               | 1009680                        | (A/C)       |
| 25959       | CadSNP1554     | <i>Desi</i>      | Ca_Desig_Chr03               | 1037187                        | (A/G)       |
| 25960       | CadSNP1555     | <i>Desi</i>      | Ca_Desig_Chr03               | 1132867                        | (G/A)       |
| 25961       | CadSNP1556     | <i>Desi</i>      | Ca_Desig_Chr03               | 1138482                        | (A/G)       |
| 25962       | CadSNP1557     | <i>Desi</i>      | Ca_Desig_Chr03               | 1142176                        | (T/C)       |
| 25963       | CadSNP1558     | <i>Desi</i>      | Ca_Desig_Chr03               | 1142293                        | (C/A)       |
| 25964       | CadSNP1559     | <i>Desi</i>      | Ca_Desig_Chr03               | 1146163                        | (T/C)       |
| 25965       | CadSNP1560     | <i>Desi</i>      | Ca_Desig_Chr03               | 1147189                        | (C/T)       |
| 25966       | CadSNP1561     | <i>Desi</i>      | Ca_Desig_Chr03               | 1148157                        | (G/T)       |
| 25967       | CadSNP1562     | <i>Desi</i>      | Ca_Desig_Chr03               | 1148176                        | (T/G)       |
| 25968       | CadSNP1563     | <i>Desi</i>      | Ca_Desig_Chr03               | 1148257                        | (A/G)       |
| 25969       | CadSNP1564     | <i>Desi</i>      | Ca_Desig_Chr03               | 1148353                        | (A/C)       |
| 25970       | CadSNP1565     | <i>Desi</i>      | Ca_Desig_Chr03               | 1156273                        | (T/C)       |
| 25971       | CadSNP1566     | <i>Desi</i>      | Ca_Desig_Chr03               | 1156347                        | (G/C)       |
| 25972       | CadSNP1567     | <i>Desi</i>      | Ca_Desig_Chr03               | 1198705                        | (A/C)       |
| 25973       | CadSNP1568     | <i>Desi</i>      | Ca_Desig_Chr03               | 1198729                        | (T/C)       |
| 25974       | CadSNP1569     | <i>Desi</i>      | Ca_Desig_Chr03               | 1198799                        | (T/A)       |
| 25975       | CadSNP1570     | <i>Desi</i>      | Ca_Desig_Chr03               | 1199241                        | (C/A)       |
| 25976       | CadSNP1571     | <i>Desi</i>      | Ca_Desig_Chr03               | 1205701                        | (A/G)       |
| 25977       | CadSNP1572     | <i>Desi</i>      | Ca_Desig_Chr03               | 1205850                        | (A/T)       |
| 25978       | CadSNP1573     | <i>Desi</i>      | Ca_Desig_Chr03               | 1205847                        | (G/C)       |
| 25979       | CadSNP1574     | <i>Desi</i>      | Ca_Desig_Chr03               | 1205826                        | (T/G)       |
| 25980       | CadSNP1575     | <i>Desi</i>      | Ca_Desig_Chr03               | 1205824                        | (T/A)       |
| 25981       | CadSNP1576     | <i>Desi</i>      | Ca_Desig_Chr03               | 1205811                        | (T/A)       |
| 25982       | CadSNP1577     | <i>Desi</i>      | Ca_Desig_Chr03               | 1205789                        | (A/C)       |
| 25983       | CadSNP1578     | <i>Desi</i>      | Ca_Desig_Chr03               | 1208905                        | (A/G)       |
| 25984       | CadSNP1579     | <i>Desi</i>      | Ca_Desig_Chr03               | 1208869                        | (T/C)       |
| 25985       | CadSNP1580     | <i>Desi</i>      | Ca_Desig_Chr03               | 1223420                        | (C/A)       |
| 25986       | CadSNP1581     | <i>Desi</i>      | Ca_Desig_Chr03               | 1228195                        | (A/G)       |
| 25987       | CadSNP1582     | <i>Desi</i>      | Ca_Desig_Chr03               | 1228218                        | (T/C)       |
| 25988       | CadSNP1583     | <i>Desi</i>      | Ca_Desig_Chr03               | 1228231                        | (A/C)       |
| 25989       | CadSNP1584     | <i>Desi</i>      | Ca_Desig_Chr03               | 1233409                        | (A/C)       |
| 25990       | CadSNP1585     | <i>Desi</i>      | Ca_Desig_Chr03               | 1255515                        | (C/T)       |
| 25991       | CadSNP1586     | <i>Desi</i>      | Ca_Desig_Chr03               | 1267770                        | (T/C)       |

| <b>S.N.</b> | <b>SNP IDs</b> | <b>Cultivars</b> | <b>Chromosomes/scaffolds</b> | <b>Physical positions (bp)</b> | <b>SNPs</b> |
|-------------|----------------|------------------|------------------------------|--------------------------------|-------------|
| 25992       | CadSNP1587     | <i>Desi</i>      | Ca_Desig_Chr03               | 1286463                        | (T/C)       |
| 25993       | CadSNP1588     | <i>Desi</i>      | Ca_Desig_Chr03               | 1286513                        | (G/A)       |
| 25994       | CadSNP1589     | <i>Desi</i>      | Ca_Desig_Chr03               | 1298429                        | (G/T)       |
| 25995       | CadSNP1590     | <i>Desi</i>      | Ca_Desig_Chr03               | 1298524                        | (G/A)       |
| 25996       | CadSNP1591     | <i>Desi</i>      | Ca_Desig_Chr03               | 1298497                        | (C/T)       |
| 25997       | CadSNP1592     | <i>Desi</i>      | Ca_Desig_Chr03               | 1298488                        | (A/G)       |
| 25998       | CadSNP1593     | <i>Desi</i>      | Ca_Desig_Chr03               | 1348788                        | (C/G)       |
| 25999       | CadSNP1594     | <i>Desi</i>      | Ca_Desig_Chr03               | 1348911                        | (T/C)       |
| 26000       | CadSNP1595     | <i>Desi</i>      | Ca_Desig_Chr03               | 1392395                        | (A/G)       |
| 26001       | CadSNP1596     | <i>Desi</i>      | Ca_Desig_Chr03               | 1404434                        | (T/A)       |
| 26002       | CadSNP1597     | <i>Desi</i>      | Ca_Desig_Chr03               | 1404499                        | (A/G)       |
| 26003       | CadSNP1598     | <i>Desi</i>      | Ca_Desig_Chr03               | 1414321                        | (A/G)       |
| 26004       | CadSNP1599     | <i>Desi</i>      | Ca_Desig_Chr03               | 1416925                        | (C/T)       |
| 26005       | CadSNP1600     | <i>Desi</i>      | Ca_Desig_Chr03               | 1416904                        | (T/A)       |
| 26006       | CadSNP1601     | <i>Desi</i>      | Ca_Desig_Chr03               | 1416895                        | (A/T)       |
| 26007       | CadSNP1602     | <i>Desi</i>      | Ca_Desig_Chr03               | 1427742                        | (C/T)       |
| 26008       | CadSNP1603     | <i>Desi</i>      | Ca_Desig_Chr03               | 1427752                        | (C/T)       |
| 26009       | CadSNP1604     | <i>Desi</i>      | Ca_Desig_Chr03               | 1427760                        | (A/G)       |
| 26010       | CadSNP1605     | <i>Desi</i>      | Ca_Desig_Chr03               | 1427788                        | (C/T)       |
| 26011       | CadSNP1606     | <i>Desi</i>      | Ca_Desig_Chr03               | 1427793                        | (G/A)       |
| 26012       | CadSNP1607     | <i>Desi</i>      | Ca_Desig_Chr03               | 1427796                        | (A/G)       |
| 26013       | CadSNP1608     | <i>Desi</i>      | Ca_Desig_Chr03               | 1427799                        | (T/C)       |
| 26014       | CadSNP1609     | <i>Desi</i>      | Ca_Desig_Chr03               | 1427811                        | (A/T)       |
| 26015       | CadSNP1610     | <i>Desi</i>      | Ca_Desig_Chr03               | 1427822                        | (A/T)       |
| 26016       | CadSNP1611     | <i>Desi</i>      | Ca_Desig_Chr03               | 1427904                        | (A/G)       |
| 26017       | CadSNP1612     | <i>Desi</i>      | Ca_Desig_Chr03               | 1427901                        | (A/T)       |
| 26018       | CadSNP1613     | <i>Desi</i>      | Ca_Desig_Chr03               | 1427892                        | (A/T)       |
| 26019       | CadSNP1614     | <i>Desi</i>      | Ca_Desig_Chr03               | 1427874                        | (T/C)       |
| 26020       | CadSNP1615     | <i>Desi</i>      | Ca_Desig_Chr03               | 1427865                        | (T/C)       |
| 26021       | CadSNP1616     | <i>Desi</i>      | Ca_Desig_Chr03               | 1427862                        | (T/A)       |
| 26022       | CadSNP1617     | <i>Desi</i>      | Ca_Desig_Chr03               | 1427850                        | (A/G)       |
| 26023       | CadSNP1618     | <i>Desi</i>      | Ca_Desig_Chr03               | 1427826                        | (T/C)       |
| 26024       | CadSNP1619     | <i>Desi</i>      | Ca_Desig_Chr03               | 1427905                        | (T/C)       |
| 26025       | CadSNP1620     | <i>Desi</i>      | Ca_Desig_Chr03               | 1463047                        | (A/G)       |
| 26026       | CadSNP1621     | <i>Desi</i>      | Ca_Desig_Chr03               | 1503173                        | (A/T)       |
| 26027       | CadSNP1622     | <i>Desi</i>      | Ca_Desig_Chr03               | 1516868                        | (C/A)       |
| 26028       | CadSNP1623     | <i>Desi</i>      | Ca_Desig_Chr03               | 1533891                        | (A/C)       |
| 26029       | CadSNP1624     | <i>Desi</i>      | Ca_Desig_Chr03               | 1536663                        | (G/T)       |

| <b>S.N.</b> | <b>SNP IDs</b> | <b>Cultivars</b> | <b>Chromosomes/scaffolds</b> | <b>Physical positions (bp)</b> | <b>SNPs</b> |
|-------------|----------------|------------------|------------------------------|--------------------------------|-------------|
| 26030       | CadSNP1625     | <i>Desi</i>      | Ca_Desig_Chr03               | 1536675                        | (G/A)       |
| 26031       | CadSNP1626     | <i>Desi</i>      | Ca_Desig_Chr03               | 1536708                        | (A/G)       |
| 26032       | CadSNP1627     | <i>Desi</i>      | Ca_Desig_Chr03               | 1536748                        | (A/G)       |
| 26033       | CadSNP1628     | <i>Desi</i>      | Ca_Desig_Chr03               | 1536750                        | (A/G)       |
| 26034       | CadSNP1629     | <i>Desi</i>      | Ca_Desig_Chr03               | 1536753                        | (C/T)       |
| 26035       | CadSNP1630     | <i>Desi</i>      | Ca_Desig_Chr03               | 1536804                        | (A/T)       |
| 26036       | CadSNP1631     | <i>Desi</i>      | Ca_Desig_Chr03               | 1554464                        | (T/C)       |
| 26037       | CadSNP1632     | <i>Desi</i>      | Ca_Desig_Chr03               | 1554518                        | (T/C)       |
| 26038       | CadSNP1633     | <i>Desi</i>      | Ca_Desig_Chr03               | 1554578                        | (C/T)       |
| 26039       | CadSNP1634     | <i>Desi</i>      | Ca_Desig_Chr03               | 1633031                        | (T/A)       |
| 26040       | CadSNP1635     | <i>Desi</i>      | Ca_Desig_Chr03               | 1659975                        | (A/G)       |
| 26041       | CadSNP1636     | <i>Desi</i>      | Ca_Desig_Chr03               | 1667821                        | (C/T)       |
| 26042       | CadSNP1637     | <i>Desi</i>      | Ca_Desig_Chr03               | 1670337                        | (C/T)       |
| 26043       | CadSNP1638     | <i>Desi</i>      | Ca_Desig_Chr03               | 1686934                        | (G/C)       |
| 26044       | CadSNP1639     | <i>Desi</i>      | Ca_Desig_Chr03               | 1686974                        | (G/A)       |
| 26045       | CadSNP1640     | <i>Desi</i>      | Ca_Desig_Chr03               | 2660813                        | (A/G)       |
| 26046       | CadSNP1641     | <i>Desi</i>      | Ca_Desig_Chr03               | 2660782                        | (C/T)       |
| 26047       | CadSNP1642     | <i>Desi</i>      | Ca_Desig_Chr03               | 2672499                        | (G/A)       |
| 26048       | CadSNP1643     | <i>Desi</i>      | Ca_Desig_Chr03               | 2674284                        | (T/A)       |
| 26049       | CadSNP1644     | <i>Desi</i>      | Ca_Desig_Chr03               | 2674302                        | (A/G)       |
| 26050       | CadSNP1645     | <i>Desi</i>      | Ca_Desig_Chr03               | 2674439                        | (A/C)       |
| 26051       | CadSNP1646     | <i>Desi</i>      | Ca_Desig_Chr03               | 2679323                        | (A/G)       |
| 26052       | CadSNP1647     | <i>Desi</i>      | Ca_Desig_Chr03               | 2683637                        | (T/G)       |
| 26053       | CadSNP1648     | <i>Desi</i>      | Ca_Desig_Chr03               | 2693535                        | (C/G)       |
| 26054       | CadSNP1649     | <i>Desi</i>      | Ca_Desig_Chr03               | 2693537                        | (C/T)       |
| 26055       | CadSNP1650     | <i>Desi</i>      | Ca_Desig_Chr03               | 2700887                        | (T/C)       |
| 26056       | CadSNP1651     | <i>Desi</i>      | Ca_Desig_Chr03               | 2713239                        | (T/A)       |
| 26057       | CadSNP1652     | <i>Desi</i>      | Ca_Desig_Chr03               | 2713248                        | (A/C)       |
| 26058       | CadSNP1653     | <i>Desi</i>      | Ca_Desig_Chr03               | 2716549                        | (G/A)       |
| 26059       | CadSNP1654     | <i>Desi</i>      | Ca_Desig_Chr03               | 2718128                        | (G/C)       |
| 26060       | CadSNP1655     | <i>Desi</i>      | Ca_Desig_Chr03               | 2718129                        | (G/A)       |
| 26061       | CadSNP1656     | <i>Desi</i>      | Ca_Desig_Chr03               | 2718182                        | (A/T)       |
| 26062       | CadSNP1657     | <i>Desi</i>      | Ca_Desig_Chr03               | 2725750                        | (A/G)       |
| 26063       | CadSNP1658     | <i>Desi</i>      | Ca_Desig_Chr03               | 2729400                        | (A/G)       |
| 26064       | CadSNP1659     | <i>Desi</i>      | Ca_Desig_Chr03               | 2737288                        | (T/C)       |
| 26065       | CadSNP1660     | <i>Desi</i>      | Ca_Desig_Chr03               | 2754108                        | (C/T)       |
| 26066       | CadSNP1661     | <i>Desi</i>      | Ca_Desig_Chr03               | 2754162                        | (C/G)       |
| 26067       | CadSNP1662     | <i>Desi</i>      | Ca_Desig_Chr03               | 2758011                        | (G/T)       |



| <b>S.N.</b> | <b>SNP IDs</b> | <b>Cultivars</b> | <b>Chromosomes/scaffolds</b> | <b>Physical positions (bp)</b> | <b>SNPs</b> |
|-------------|----------------|------------------|------------------------------|--------------------------------|-------------|
| 26068       | CadSNP1663     | <i>Desi</i>      | Ca_Desig_Chr03               | 2758003                        | (A/C)       |
| 26069       | CadSNP1664     | <i>Desi</i>      | Ca_Desig_Chr03               | 2787196                        | (C/G)       |
| 26070       | CadSNP1665     | <i>Desi</i>      | Ca_Desig_Chr03               | 2787283                        | (G/C)       |
| 26071       | CadSNP1666     | <i>Desi</i>      | Ca_Desig_Chr03               | 2787268                        | (T/C)       |
| 26072       | CadSNP1667     | <i>Desi</i>      | Ca_Desig_Chr03               | 2787355                        | (G/C)       |
| 26073       | CadSNP1668     | <i>Desi</i>      | Ca_Desig_Chr03               | 2793058                        | (G/A)       |
| 26074       | CadSNP1669     | <i>Desi</i>      | Ca_Desig_Chr03               | 2795523                        | (C/T)       |
| 26075       | CadSNP1670     | <i>Desi</i>      | Ca_Desig_Chr03               | 2799304                        | (T/C)       |
| 26076       | CadSNP1671     | <i>Desi</i>      | Ca_Desig_Chr03               | 2803750                        | (A/G)       |
| 26077       | CadSNP1672     | <i>Desi</i>      | Ca_Desig_Chr03               | 2812122                        | (G/A)       |
| 26078       | CadSNP1673     | <i>Desi</i>      | Ca_Desig_Chr03               | 2814757                        | (A/G)       |
| 26079       | CadSNP1674     | <i>Desi</i>      | Ca_Desig_Chr03               | 2814908                        | (G/A)       |
| 26080       | CadSNP1675     | <i>Desi</i>      | Ca_Desig_Chr03               | 2840621                        | (G/A)       |
| 26081       | CadSNP1676     | <i>Desi</i>      | Ca_Desig_Chr03               | 2873563                        | (G/T)       |
| 26082       | CadSNP1677     | <i>Desi</i>      | Ca_Desig_Chr03               | 2920219                        | (A/G)       |
| 26083       | CadSNP1678     | <i>Desi</i>      | Ca_Desig_Chr03               | 2920379                        | (G/A)       |
| 26084       | CadSNP1679     | <i>Desi</i>      | Ca_Desig_Chr03               | 2953036                        | (C/T)       |
| 26085       | CadSNP1680     | <i>Desi</i>      | Ca_Desig_Chr03               | 2986236                        | (C/T)       |
| 26086       | CadSNP1681     | <i>Desi</i>      | Ca_Desig_Chr03               | 2986233                        | (T/C)       |
| 26087       | CadSNP1682     | <i>Desi</i>      | Ca_Desig_Chr03               | 2991036                        | (A/C)       |
| 26088       | CadSNP1683     | <i>Desi</i>      | Ca_Desig_Chr03               | 3002455                        | (A/C)       |
| 26089       | CadSNP1684     | <i>Desi</i>      | Ca_Desig_Chr03               | 3015825                        | (A/G)       |
| 26090       | CadSNP1685     | <i>Desi</i>      | Ca_Desig_Chr03               | 3015816                        | (A/G)       |
| 26091       | CadSNP1686     | <i>Desi</i>      | Ca_Desig_Chr03               | 3048193                        | (C/T)       |
| 26092       | CadSNP1687     | <i>Desi</i>      | Ca_Desig_Chr03               | 3048229                        | (T/C)       |
| 26093       | CadSNP1688     | <i>Desi</i>      | Ca_Desig_Chr03               | 3130784                        | (G/T)       |
| 26094       | CadSNP1689     | <i>Desi</i>      | Ca_Desig_Chr03               | 3179253                        | (C/T)       |
| 26095       | CadSNP1690     | <i>Desi</i>      | Ca_Desig_Chr03               | 3187918                        | (A/T)       |
| 26096       | CadSNP1691     | <i>Desi</i>      | Ca_Desig_Chr03               | 3218964                        | (A/G)       |
| 26097       | CadSNP1692     | <i>Desi</i>      | Ca_Desig_Chr03               | 3224433                        | (T/C)       |
| 26098       | CadSNP1693     | <i>Desi</i>      | Ca_Desig_Chr03               | 3254955                        | (C/T)       |
| 26099       | CadSNP1694     | <i>Desi</i>      | Ca_Desig_Chr03               | 3255060                        | (C/T)       |
| 26100       | CadSNP1695     | <i>Desi</i>      | Ca_Desig_Chr03               | 3255029                        | (C/T)       |
| 26101       | CadSNP1696     | <i>Desi</i>      | Ca_Desig_Chr03               | 3267987                        | (T/G)       |
| 26102       | CadSNP1697     | <i>Desi</i>      | Ca_Desig_Chr03               | 3295800                        | (T/A)       |
| 26103       | CadSNP1698     | <i>Desi</i>      | Ca_Desig_Chr03               | 3333129                        | (A/G)       |
| 26104       | CadSNP1699     | <i>Desi</i>      | Ca_Desig_Chr03               | 3398702                        | (A/G)       |
| 26105       | CadSNP1700     | <i>Desi</i>      | Ca_Desig_Chr03               | 3398708                        | (C/A)       |

| <b>S.N.</b> | <b>SNP IDs</b> | <b>Cultivars</b> | <b>Chromosomes/scaffolds</b> | <b>Physical positions (bp)</b> | <b>SNPs</b> |
|-------------|----------------|------------------|------------------------------|--------------------------------|-------------|
| 26106       | CadSNP1701     | <i>Desi</i>      | Ca_Desig_Chr03               | 3404200                        | (C/A)       |
| 26107       | CadSNP1702     | <i>Desi</i>      | Ca_Desig_Chr03               | 3424969                        | (T/C)       |
| 26108       | CadSNP1703     | <i>Desi</i>      | Ca_Desig_Chr03               | 3427256                        | (G/T)       |
| 26109       | CadSNP1704     | <i>Desi</i>      | Ca_Desig_Chr03               | 3455564                        | (G/A)       |
| 26110       | CadSNP1705     | <i>Desi</i>      | Ca_Desig_Chr03               | 3479333                        | (A/C)       |
| 26111       | CadSNP1706     | <i>Desi</i>      | Ca_Desig_Chr03               | 3488455                        | (C/A)       |
| 26112       | CadSNP1707     | <i>Desi</i>      | Ca_Desig_Chr03               | 3493823                        | (T/G)       |
| 26113       | CadSNP1708     | <i>Desi</i>      | Ca_Desig_Chr03               | 3493826                        | (C/T)       |
| 26114       | CadSNP1709     | <i>Desi</i>      | Ca_Desig_Chr03               | 3493840                        | (G/C)       |
| 26115       | CadSNP1710     | <i>Desi</i>      | Ca_Desig_Chr03               | 3495518                        | (T/A)       |
| 26116       | CadSNP1711     | <i>Desi</i>      | Ca_Desig_Chr03               | 3495509                        | (T/C)       |
| 26117       | CadSNP1712     | <i>Desi</i>      | Ca_Desig_Chr03               | 3495557                        | (A/G)       |
| 26118       | CadSNP1713     | <i>Desi</i>      | Ca_Desig_Chr03               | 3512869                        | (A/G)       |
| 26119       | CadSNP1714     | <i>Desi</i>      | Ca_Desig_Chr03               | 3523403                        | (T/C)       |
| 26120       | CadSNP1715     | <i>Desi</i>      | Ca_Desig_Chr03               | 3523411                        | (T/A)       |
| 26121       | CadSNP1716     | <i>Desi</i>      | Ca_Desig_Chr03               | 3524914                        | (A/G)       |
| 26122       | CadSNP1717     | <i>Desi</i>      | Ca_Desig_Chr03               | 3524855                        | (T/C)       |
| 26123       | CadSNP1718     | <i>Desi</i>      | Ca_Desig_Chr03               | 3524842                        | (C/T)       |
| 26124       | CadSNP1719     | <i>Desi</i>      | Ca_Desig_Chr03               | 3538547                        | (C/A)       |
| 26125       | CadSNP1720     | <i>Desi</i>      | Ca_Desig_Chr03               | 3567295                        | (T/C)       |
| 26126       | CadSNP1721     | <i>Desi</i>      | Ca_Desig_Chr03               | 3567298                        | (C/T)       |
| 26127       | CadSNP1722     | <i>Desi</i>      | Ca_Desig_Chr03               | 3567301                        | (C/T)       |
| 26128       | CadSNP1723     | <i>Desi</i>      | Ca_Desig_Chr03               | 3567305                        | (C/T)       |
| 26129       | CadSNP1724     | <i>Desi</i>      | Ca_Desig_Chr03               | 3567444                        | (C/T)       |
| 26130       | CadSNP1725     | <i>Desi</i>      | Ca_Desig_Chr03               | 3576516                        | (C/T)       |
| 26131       | CadSNP1726     | <i>Desi</i>      | Ca_Desig_Chr03               | 3576517                        | (T/C)       |
| 26132       | CadSNP1727     | <i>Desi</i>      | Ca_Desig_Chr03               | 3576686                        | (A/G)       |
| 26133       | CadSNP1728     | <i>Desi</i>      | Ca_Desig_Chr03               | 3580883                        | (T/C)       |
| 26134       | CadSNP1729     | <i>Desi</i>      | Ca_Desig_Chr03               | 3593781                        | (T/C)       |
| 26135       | CadSNP1730     | <i>Desi</i>      | Ca_Desig_Chr03               | 3593776                        | (A/G)       |
| 26136       | CadSNP1731     | <i>Desi</i>      | Ca_Desig_Chr03               | 3609578                        | (C/T)       |
| 26137       | CadSNP1732     | <i>Desi</i>      | Ca_Desig_Chr03               | 3621996                        | (T/C)       |
| 26138       | CadSNP1733     | <i>Desi</i>      | Ca_Desig_Chr03               | 3630551                        | (A/G)       |
| 26139       | CadSNP1734     | <i>Desi</i>      | Ca_Desig_Chr03               | 3631362                        | (C/T)       |
| 26140       | CadSNP1735     | <i>Desi</i>      | Ca_Desig_Chr03               | 3713712                        | (C/G)       |
| 26141       | CadSNP1736     | <i>Desi</i>      | Ca_Desig_Chr03               | 3773822                        | (A/G)       |
| 26142       | CadSNP1737     | <i>Desi</i>      | Ca_Desig_Chr03               | 3773865                        | (T/C)       |
| 26143       | CadSNP1738     | <i>Desi</i>      | Ca_Desig_Chr03               | 3774007                        | (A/T)       |

| <b>S.N.</b> | <b>SNP IDs</b> | <b>Cultivars</b> | <b>Chromosomes/scaffolds</b> | <b>Physical positions (bp)</b> | <b>SNPs</b> |
|-------------|----------------|------------------|------------------------------|--------------------------------|-------------|
| 26144       | CadSNP1739     | <i>Desi</i>      | Ca_Desig_Chr03               | 3794458                        | (A/G)       |
| 26145       | CadSNP1740     | <i>Desi</i>      | Ca_Desig_Chr03               | 3860790                        | (G/C)       |
| 26146       | CadSNP1741     | <i>Desi</i>      | Ca_Desig_Chr03               | 3860844                        | (G/A)       |
| 26147       | CadSNP1742     | <i>Desi</i>      | Ca_Desig_Chr03               | 3861051                        | (C/T)       |
| 26148       | CadSNP1743     | <i>Desi</i>      | Ca_Desig_Chr03               | 3884489                        | (A/C)       |
| 26149       | CadSNP1744     | <i>Desi</i>      | Ca_Desig_Chr03               | 3884665                        | (C/A)       |
| 26150       | CadSNP1745     | <i>Desi</i>      | Ca_Desig_Chr03               | 3913855                        | (G/A)       |
| 26151       | CadSNP1746     | <i>Desi</i>      | Ca_Desig_Chr03               | 3946342                        | (G/A)       |
| 26152       | CadSNP1747     | <i>Desi</i>      | Ca_Desig_Chr03               | 3946457                        | (G/T)       |
| 26153       | CadSNP1748     | <i>Desi</i>      | Ca_Desig_Chr03               | 3967388                        | (G/A)       |
| 26154       | CadSNP1749     | <i>Desi</i>      | Ca_Desig_Chr03               | 3967371                        | (G/T)       |
| 26155       | CadSNP1750     | <i>Desi</i>      | Ca_Desig_Chr03               | 3973351                        | (C/T)       |
| 26156       | CadSNP1751     | <i>Desi</i>      | Ca_Desig_Chr03               | 3973376                        | (T/C)       |
| 26157       | CadSNP1752     | <i>Desi</i>      | Ca_Desig_Chr03               | 3973381                        | (A/G)       |
| 26158       | CadSNP1753     | <i>Desi</i>      | Ca_Desig_Chr03               | 4015979                        | (G/A)       |
| 26159       | CadSNP1754     | <i>Desi</i>      | Ca_Desig_Chr03               | 4016158                        | (C/T)       |
| 26160       | CadSNP1755     | <i>Desi</i>      | Ca_Desig_Chr03               | 4016176                        | (A/C)       |
| 26161       | CadSNP1756     | <i>Desi</i>      | Ca_Desig_Chr03               | 4019445                        | (T/G)       |
| 26162       | CadSNP1757     | <i>Desi</i>      | Ca_Desig_Chr03               | 4019505                        | (T/C)       |
| 26163       | CadSNP1758     | <i>Desi</i>      | Ca_Desig_Chr03               | 4039042                        | (A/G)       |
| 26164       | CadSNP1759     | <i>Desi</i>      | Ca_Desig_Chr03               | 4053024                        | (G/A)       |
| 26165       | CadSNP1760     | <i>Desi</i>      | Ca_Desig_Chr03               | 4085844                        | (A/G)       |
| 26166       | CadSNP1761     | <i>Desi</i>      | Ca_Desig_Chr03               | 4086443                        | (T/C)       |
| 26167       | CadSNP1762     | <i>Desi</i>      | Ca_Desig_Chr03               | 4086479                        | (C/T)       |
| 26168       | CadSNP1763     | <i>Desi</i>      | Ca_Desig_Chr03               | 4087924                        | (T/C)       |
| 26169       | CadSNP1764     | <i>Desi</i>      | Ca_Desig_Chr03               | 4087934                        | (C/A)       |
| 26170       | CadSNP1765     | <i>Desi</i>      | Ca_Desig_Chr03               | 4098735                        | (T/A)       |
| 26171       | CadSNP1766     | <i>Desi</i>      | Ca_Desig_Chr03               | 4098784                        | (C/A)       |
| 26172       | CadSNP1767     | <i>Desi</i>      | Ca_Desig_Chr03               | 4100611                        | (T/C)       |
| 26173       | CadSNP1768     | <i>Desi</i>      | Ca_Desig_Chr03               | 4100608                        | (C/T)       |
| 26174       | CadSNP1769     | <i>Desi</i>      | Ca_Desig_Chr03               | 4100572                        | (C/T)       |
| 26175       | CadSNP1770     | <i>Desi</i>      | Ca_Desig_Chr03               | 4100651                        | (C/T)       |
| 26176       | CadSNP1771     | <i>Desi</i>      | Ca_Desig_Chr03               | 4100710                        | (C/T)       |
| 26177       | CadSNP1772     | <i>Desi</i>      | Ca_Desig_Chr03               | 4100757                        | (T/G)       |
| 26178       | CadSNP1773     | <i>Desi</i>      | Ca_Desig_Chr03               | 4100741                        | (G/A)       |
| 26179       | CadSNP1774     | <i>Desi</i>      | Ca_Desig_Chr03               | 4100725                        | (A/T)       |
| 26180       | CadSNP1775     | <i>Desi</i>      | Ca_Desig_Chr03               | 4118888                        | (G/A)       |
| 26181       | CadSNP1776     | <i>Desi</i>      | Ca_Desig_Chr03               | 4118883                        | (T/C)       |

| <b>S.N.</b> | <b>SNP IDs</b> | <b>Cultivars</b> | <b>Chromosomes/scaffolds</b> | <b>Physical positions (bp)</b> | <b>SNPs</b> |
|-------------|----------------|------------------|------------------------------|--------------------------------|-------------|
| 26182       | CadSNP1777     | <i>Desi</i>      | Ca_Desig_Chr03               | 4133177                        | (T/G)       |
| 26183       | CadSNP1778     | <i>Desi</i>      | Ca_Desig_Chr03               | 4133180                        | (T/C)       |
| 26184       | CadSNP1779     | <i>Desi</i>      | Ca_Desig_Chr03               | 4134312                        | (C/G)       |
| 26185       | CadSNP1780     | <i>Desi</i>      | Ca_Desig_Chr03               | 4135452                        | (G/T)       |
| 26186       | CadSNP1781     | <i>Desi</i>      | Ca_Desig_Chr03               | 4143474                        | (G/A)       |
| 26187       | CadSNP1782     | <i>Desi</i>      | Ca_Desig_Chr03               | 4145509                        | (T/C)       |
| 26188       | CadSNP1783     | <i>Desi</i>      | Ca_Desig_Chr03               | 4174824                        | (T/G)       |
| 26189       | CadSNP1784     | <i>Desi</i>      | Ca_Desig_Chr03               | 4174837                        | (A/G)       |
| 26190       | CadSNP1785     | <i>Desi</i>      | Ca_Desig_Chr03               | 4174863                        | (A/G)       |
| 26191       | CadSNP1786     | <i>Desi</i>      | Ca_Desig_Chr03               | 4175622                        | (A/C)       |
| 26192       | CadSNP1787     | <i>Desi</i>      | Ca_Desig_Chr03               | 4182312                        | (A/T)       |
| 26193       | CadSNP1788     | <i>Desi</i>      | Ca_Desig_Chr03               | 4182322                        | (G/A)       |
| 26194       | CadSNP1789     | <i>Desi</i>      | Ca_Desig_Chr03               | 4182356                        | (T/A)       |
| 26195       | CadSNP1790     | <i>Desi</i>      | Ca_Desig_Chr03               | 4187139                        | (G/A)       |
| 26196       | CadSNP1791     | <i>Desi</i>      | Ca_Desig_Chr03               | 4197023                        | (A/T)       |
| 26197       | CadSNP1792     | <i>Desi</i>      | Ca_Desig_Chr03               | 4197024                        | (A/T)       |
| 26198       | CadSNP1793     | <i>Desi</i>      | Ca_Desig_Chr03               | 4197306                        | (A/G)       |
| 26199       | CadSNP1794     | <i>Desi</i>      | Ca_Desig_Chr03               | 4197307                        | (C/T)       |
| 26200       | CadSNP1795     | <i>Desi</i>      | Ca_Desig_Chr03               | 4197439                        | (G/A)       |
| 26201       | CadSNP1796     | <i>Desi</i>      | Ca_Desig_Chr03               | 4197390                        | (G/T)       |
| 26202       | CadSNP1797     | <i>Desi</i>      | Ca_Desig_Chr03               | 4197482                        | (T/A)       |
| 26203       | CadSNP1798     | <i>Desi</i>      | Ca_Desig_Chr03               | 4197487                        | (T/A)       |
| 26204       | CadSNP1799     | <i>Desi</i>      | Ca_Desig_Chr03               | 4211457                        | (C/T)       |
| 26205       | CadSNP1800     | <i>Desi</i>      | Ca_Desig_Chr03               | 4211455                        | (C/T)       |
| 26206       | CadSNP1801     | <i>Desi</i>      | Ca_Desig_Chr03               | 4211441                        | (G/T)       |
| 26207       | CadSNP1802     | <i>Desi</i>      | Ca_Desig_Chr03               | 4211431                        | (G/C)       |
| 26208       | CadSNP1803     | <i>Desi</i>      | Ca_Desig_Chr03               | 4216738                        | (T/C)       |
| 26209       | CadSNP1804     | <i>Desi</i>      | Ca_Desig_Chr03               | 4229802                        | (C/A)       |
| 26210       | CadSNP1805     | <i>Desi</i>      | Ca_Desig_Chr03               | 4250045                        | (T/G)       |
| 26211       | CadSNP1806     | <i>Desi</i>      | Ca_Desig_Chr03               | 4261374                        | (A/G)       |
| 26212       | CadSNP1807     | <i>Desi</i>      | Ca_Desig_Chr03               | 4261410                        | (C/T)       |
| 26213       | CadSNP1808     | <i>Desi</i>      | Ca_Desig_Chr03               | 4261422                        | (C/T)       |
| 26214       | CadSNP1809     | <i>Desi</i>      | Ca_Desig_Chr03               | 4300046                        | (A/G)       |
| 26215       | CadSNP1810     | <i>Desi</i>      | Ca_Desig_Chr03               | 4300111                        | (T/C)       |
| 26216       | CadSNP1811     | <i>Desi</i>      | Ca_Desig_Chr03               | 4314473                        | (T/C)       |
| 26217       | CadSNP1812     | <i>Desi</i>      | Ca_Desig_Chr03               | 4316822                        | (T/A)       |
| 26218       | CadSNP1813     | <i>Desi</i>      | Ca_Desig_Chr03               | 4330756                        | (C/T)       |
| 26219       | CadSNP1814     | <i>Desi</i>      | Ca_Desig_Chr03               | 4347515                        | (G/T)       |

| <b>S.N.</b> | <b>SNP IDs</b> | <b>Cultivars</b> | <b>Chromosomes/scaffolds</b> | <b>Physical positions (bp)</b> | <b>SNPs</b> |
|-------------|----------------|------------------|------------------------------|--------------------------------|-------------|
| 26220       | CadSNP1815     | <i>Desi</i>      | Ca_Desig_Chr03               | 4347520                        | (C/G)       |
| 26221       | CadSNP1816     | <i>Desi</i>      | Ca_Desig_Chr03               | 4347579                        | (G/A)       |
| 26222       | CadSNP1817     | <i>Desi</i>      | Ca_Desig_Chr03               | 4356878                        | (A/T)       |
| 26223       | CadSNP1818     | <i>Desi</i>      | Ca_Desig_Chr03               | 4356995                        | (G/A)       |
| 26224       | CadSNP1819     | <i>Desi</i>      | Ca_Desig_Chr03               | 4356981                        | (C/T)       |
| 26225       | CadSNP1820     | <i>Desi</i>      | Ca_Desig_Chr03               | 4365790                        | (C/A)       |
| 26226       | CadSNP1821     | <i>Desi</i>      | Ca_Desig_Chr03               | 4389997                        | (T/C)       |
| 26227       | CadSNP1822     | <i>Desi</i>      | Ca_Desig_Chr03               | 4401074                        | (A/G)       |
| 26228       | CadSNP1823     | <i>Desi</i>      | Ca_Desig_Chr03               | 4415458                        | (G/A)       |
| 26229       | CadSNP1824     | <i>Desi</i>      | Ca_Desig_Chr03               | 4415548                        | (T/A)       |
| 26230       | CadSNP1825     | <i>Desi</i>      | Ca_Desig_Chr03               | 4415704                        | (T/A)       |
| 26231       | CadSNP1826     | <i>Desi</i>      | Ca_Desig_Chr03               | 4415709                        | (C/T)       |
| 26232       | CadSNP1827     | <i>Desi</i>      | Ca_Desig_Chr03               | 4451536                        | (A/C)       |
| 26233       | CadSNP1828     | <i>Desi</i>      | Ca_Desig_Chr03               | 4572951                        | (T/C)       |
| 26234       | CadSNP1829     | <i>Desi</i>      | Ca_Desig_Chr03               | 4573221                        | (A/T)       |
| 26235       | CadSNP1830     | <i>Desi</i>      | Ca_Desig_Chr03               | 4580231                        | (A/G)       |
| 26236       | CadSNP1831     | <i>Desi</i>      | Ca_Desig_Chr03               | 4581060                        | (G/A)       |
| 26237       | CadSNP1832     | <i>Desi</i>      | Ca_Desig_Chr03               | 4581079                        | (T/G)       |
| 26238       | CadSNP1833     | <i>Desi</i>      | Ca_Desig_Chr03               | 4664491                        | (G/A)       |
| 26239       | CadSNP1834     | <i>Desi</i>      | Ca_Desig_Chr03               | 4664461                        | (G/C)       |
| 26240       | CadSNP1835     | <i>Desi</i>      | Ca_Desig_Chr03               | 4698954                        | (A/G)       |
| 26241       | CadSNP1836     | <i>Desi</i>      | Ca_Desig_Chr03               | 4721302                        | (C/T)       |
| 26242       | CadSNP1837     | <i>Desi</i>      | Ca_Desig_Chr03               | 4736130                        | (A/T)       |
| 26243       | CadSNP1838     | <i>Desi</i>      | Ca_Desig_Chr03               | 4741278                        | (C/T)       |
| 26244       | CadSNP1839     | <i>Desi</i>      | Ca_Desig_Chr03               | 4741284                        | (C/T)       |
| 26245       | CadSNP1840     | <i>Desi</i>      | Ca_Desig_Chr03               | 4741395                        | (G/C)       |
| 26246       | CadSNP1841     | <i>Desi</i>      | Ca_Desig_Chr03               | 4787269                        | (G/T)       |
| 26247       | CadSNP1842     | <i>Desi</i>      | Ca_Desig_Chr03               | 4787368                        | (A/T)       |
| 26248       | CadSNP1843     | <i>Desi</i>      | Ca_Desig_Chr03               | 4801104                        | (T/C)       |
| 26249       | CadSNP1844     | <i>Desi</i>      | Ca_Desig_Chr03               | 4801073                        | (A/C)       |
| 26250       | CadSNP1845     | <i>Desi</i>      | Ca_Desig_Chr03               | 5804745                        | (G/C)       |
| 26251       | CadSNP1846     | <i>Desi</i>      | Ca_Desig_Chr03               | 5850077                        | (T/G)       |
| 26252       | CadSNP1847     | <i>Desi</i>      | Ca_Desig_Chr03               | 5851070                        | (C/T)       |
| 26253       | CadSNP1848     | <i>Desi</i>      | Ca_Desig_Chr03               | 5851142                        | (A/G)       |
| 26254       | CadSNP1849     | <i>Desi</i>      | Ca_Desig_Chr03               | 5944499                        | (G/T)       |
| 26255       | CadSNP1850     | <i>Desi</i>      | Ca_Desig_Chr03               | 5976239                        | (C/T)       |
| 26256       | CadSNP1851     | <i>Desi</i>      | Ca_Desig_Chr03               | 5990527                        | (G/A)       |
| 26257       | CadSNP1852     | <i>Desi</i>      | Ca_Desig_Chr03               | 5990581                        | (A/G)       |

| <b>S.N.</b> | <b>SNP IDs</b> | <b>Cultivars</b> | <b>Chromosomes/scaffolds</b> | <b>Physical positions (bp)</b> | <b>SNPs</b> |
|-------------|----------------|------------------|------------------------------|--------------------------------|-------------|
| 26258       | CadSNP1853     | <i>Desi</i>      | Ca_Desig_Chr03               | 5990565                        | (T/C)       |
| 26259       | CadSNP1854     | <i>Desi</i>      | Ca_Desig_Chr03               | 6018129                        | (A/G)       |
| 26260       | CadSNP1855     | <i>Desi</i>      | Ca_Desig_Chr03               | 6019858                        | (T/C)       |
| 26261       | CadSNP1856     | <i>Desi</i>      | Ca_Desig_Chr03               | 6027089                        | (A/G)       |
| 26262       | CadSNP1857     | <i>Desi</i>      | Ca_Desig_Chr03               | 6078359                        | (A/G)       |
| 26263       | CadSNP1858     | <i>Desi</i>      | Ca_Desig_Chr03               | 6078356                        | (A/G)       |
| 26264       | CadSNP1859     | <i>Desi</i>      | Ca_Desig_Chr03               | 6078513                        | (C/T)       |
| 26265       | CadSNP1860     | <i>Desi</i>      | Ca_Desig_Chr03               | 6078557                        | (A/C)       |
| 26266       | CadSNP1861     | <i>Desi</i>      | Ca_Desig_Chr03               | 6109024                        | (T/C)       |
| 26267       | CadSNP1862     | <i>Desi</i>      | Ca_Desig_Chr03               | 6108969                        | (T/C)       |
| 26268       | CadSNP1863     | <i>Desi</i>      | Ca_Desig_Chr03               | 6119240                        | (G/A)       |
| 26269       | CadSNP1864     | <i>Desi</i>      | Ca_Desig_Chr03               | 6119374                        | (G/T)       |
| 26270       | CadSNP1865     | <i>Desi</i>      | Ca_Desig_Chr03               | 6119459                        | (G/A)       |
| 26271       | CadSNP1866     | <i>Desi</i>      | Ca_Desig_Chr03               | 6120706                        | (C/T)       |
| 26272       | CadSNP1867     | <i>Desi</i>      | Ca_Desig_Chr03               | 6139595                        | (C/G)       |
| 26273       | CadSNP1868     | <i>Desi</i>      | Ca_Desig_Chr03               | 6139652                        | (A/T)       |
| 26274       | CadSNP1869     | <i>Desi</i>      | Ca_Desig_Chr03               | 6172165                        | (G/T)       |
| 26275       | CadSNP1870     | <i>Desi</i>      | Ca_Desig_Chr03               | 6172170                        | (A/G)       |
| 26276       | CadSNP1871     | <i>Desi</i>      | Ca_Desig_Chr03               | 6172185                        | (G/A)       |
| 26277       | CadSNP1872     | <i>Desi</i>      | Ca_Desig_Chr03               | 6172225                        | (A/T)       |
| 26278       | CadSNP1873     | <i>Desi</i>      | Ca_Desig_Chr03               | 6172249                        | (G/T)       |
| 26279       | CadSNP1874     | <i>Desi</i>      | Ca_Desig_Chr03               | 6172800                        | (C/A)       |
| 26280       | CadSNP1875     | <i>Desi</i>      | Ca_Desig_Chr03               | 6172834                        | (T/C)       |
| 26281       | CadSNP1876     | <i>Desi</i>      | Ca_Desig_Chr03               | 6195683                        | (A/G)       |
| 26282       | CadSNP1877     | <i>Desi</i>      | Ca_Desig_Chr03               | 6260072                        | (T/C)       |
| 26283       | CadSNP1878     | <i>Desi</i>      | Ca_Desig_Chr03               | 6260171                        | (C/A)       |
| 26284       | CadSNP1879     | <i>Desi</i>      | Ca_Desig_Chr03               | 6262005                        | (C/T)       |
| 26285       | CadSNP1880     | <i>Desi</i>      | Ca_Desig_Chr03               | 6295042                        | (T/A)       |
| 26286       | CadSNP1881     | <i>Desi</i>      | Ca_Desig_Chr03               | 6330548                        | (C/A)       |
| 26287       | CadSNP1882     | <i>Desi</i>      | Ca_Desig_Chr03               | 6330729                        | (C/T)       |
| 26288       | CadSNP1883     | <i>Desi</i>      | Ca_Desig_Chr03               | 6330673                        | (A/G)       |
| 26289       | CadSNP1884     | <i>Desi</i>      | Ca_Desig_Chr03               | 6390861                        | (A/G)       |
| 26290       | CadSNP1885     | <i>Desi</i>      | Ca_Desig_Chr03               | 6390842                        | (C/T)       |
| 26291       | CadSNP1886     | <i>Desi</i>      | Ca_Desig_Chr03               | 6390835                        | (C/T)       |
| 26292       | CadSNP1887     | <i>Desi</i>      | Ca_Desig_Chr03               | 6392638                        | (G/A)       |
| 26293       | CadSNP1888     | <i>Desi</i>      | Ca_Desig_Chr03               | 6408930                        | (C/T)       |
| 26294       | CadSNP1889     | <i>Desi</i>      | Ca_Desig_Chr03               | 6434624                        | (T/A)       |
| 26295       | CadSNP1890     | <i>Desi</i>      | Ca_Desig_Chr03               | 6434627                        | (G/T)       |

| <b>S.N.</b> | <b>SNP IDs</b> | <b>Cultivars</b> | <b>Chromosomes/scaffolds</b> | <b>Physical positions (bp)</b> | <b>SNPs</b> |
|-------------|----------------|------------------|------------------------------|--------------------------------|-------------|
| 26296       | CadSNP1891     | <i>Desi</i>      | Ca_Desig_Chr03               | 6434644                        | (T/C)       |
| 26297       | CadSNP1892     | <i>Desi</i>      | Ca_Desig_Chr03               | 6435914                        | (A/C)       |
| 26298       | CadSNP1893     | <i>Desi</i>      | Ca_Desig_Chr03               | 6435907                        | (T/G)       |
| 26299       | CadSNP1894     | <i>Desi</i>      | Ca_Desig_Chr03               | 6436024                        | (G/A)       |
| 26300       | CadSNP1895     | <i>Desi</i>      | Ca_Desig_Chr03               | 6435997                        | (A/G)       |
| 26301       | CadSNP1896     | <i>Desi</i>      | Ca_Desig_Chr03               | 6436085                        | (G/A)       |
| 26302       | CadSNP1897     | <i>Desi</i>      | Ca_Desig_Chr03               | 6436108                        | (A/C)       |
| 26303       | CadSNP1898     | <i>Desi</i>      | Ca_Desig_Chr03               | 6449814                        | (C/T)       |
| 26304       | CadSNP1899     | <i>Desi</i>      | Ca_Desig_Chr03               | 6449896                        | (C/T)       |
| 26305       | CadSNP1900     | <i>Desi</i>      | Ca_Desig_Chr03               | 6449881                        | (G/A)       |
| 26306       | CadSNP1901     | <i>Desi</i>      | Ca_Desig_Chr03               | 6485692                        | (A/G)       |
| 26307       | CadSNP1902     | <i>Desi</i>      | Ca_Desig_Chr03               | 6490909                        | (C/T)       |
| 26308       | CadSNP1903     | <i>Desi</i>      | Ca_Desig_Chr03               | 6499799                        | (A/C)       |
| 26309       | CadSNP1904     | <i>Desi</i>      | Ca_Desig_Chr03               | 6499971                        | (A/T)       |
| 26310       | CadSNP1905     | <i>Desi</i>      | Ca_Desig_Chr03               | 6499977                        | (A/G)       |
| 26311       | CadSNP1906     | <i>Desi</i>      | Ca_Desig_Chr03               | 6499989                        | (A/T)       |
| 26312       | CadSNP1907     | <i>Desi</i>      | Ca_Desig_Chr03               | 6499995                        | (A/G)       |
| 26313       | CadSNP1908     | <i>Desi</i>      | Ca_Desig_Chr03               | 6500010                        | (A/G)       |
| 26314       | CadSNP1909     | <i>Desi</i>      | Ca_Desig_Chr03               | 6500013                        | (A/C)       |
| 26315       | CadSNP1910     | <i>Desi</i>      | Ca_Desig_Chr03               | 6500019                        | (A/G)       |
| 26316       | CadSNP1911     | <i>Desi</i>      | Ca_Desig_Chr03               | 6500028                        | (A/G)       |
| 26317       | CadSNP1912     | <i>Desi</i>      | Ca_Desig_Chr03               | 6501197                        | (A/T)       |
| 26318       | CadSNP1913     | <i>Desi</i>      | Ca_Desig_Chr03               | 6501233                        | (T/A)       |
| 26319       | CadSNP1914     | <i>Desi</i>      | Ca_Desig_Chr03               | 6501239                        | (G/A)       |
| 26320       | CadSNP1915     | <i>Desi</i>      | Ca_Desig_Chr03               | 6501241                        | (T/C)       |
| 26321       | CadSNP1916     | <i>Desi</i>      | Ca_Desig_Chr03               | 6501247                        | (G/A)       |
| 26322       | CadSNP1917     | <i>Desi</i>      | Ca_Desig_Chr03               | 6501251                        | (C/T)       |
| 26323       | CadSNP1918     | <i>Desi</i>      | Ca_Desig_Chr03               | 6501259                        | (T/C)       |
| 26324       | CadSNP1919     | <i>Desi</i>      | Ca_Desig_Chr03               | 6501274                        | (C/A)       |
| 26325       | CadSNP1920     | <i>Desi</i>      | Ca_Desig_Chr03               | 6501442                        | (C/T)       |
| 26326       | CadSNP1921     | <i>Desi</i>      | Ca_Desig_Chr03               | 6501440                        | (T/A)       |
| 26327       | CadSNP1922     | <i>Desi</i>      | Ca_Desig_Chr03               | 6501431                        | (G/T)       |
| 26328       | CadSNP1923     | <i>Desi</i>      | Ca_Desig_Chr03               | 6501428                        | (C/T)       |
| 26329       | CadSNP1924     | <i>Desi</i>      | Ca_Desig_Chr03               | 6501410                        | (A/G)       |
| 26330       | CadSNP1925     | <i>Desi</i>      | Ca_Desig_Chr03               | 6501383                        | (G/A)       |
| 26331       | CadSNP1926     | <i>Desi</i>      | Ca_Desig_Chr03               | 6501376                        | (C/G)       |
| 26332       | CadSNP1927     | <i>Desi</i>      | Ca_Desig_Chr03               | 6501371                        | (G/A)       |
| 26333       | CadSNP1928     | <i>Desi</i>      | Ca_Desig_Chr03               | 6501368                        | (T/G)       |

| <b>S.N.</b> | <b>SNP IDs</b> | <b>Cultivars</b> | <b>Chromosomes/scaffolds</b> | <b>Physical positions (bp)</b> | <b>SNPs</b> |
|-------------|----------------|------------------|------------------------------|--------------------------------|-------------|
| 26334       | CadSNP1929     | <i>Desi</i>      | Ca_Desig_Chr03               | 6543102                        | (A/G)       |
| 26335       | CadSNP1930     | <i>Desi</i>      | Ca_Desig_Chr03               | 6543089                        | (A/T)       |
| 26336       | CadSNP1931     | <i>Desi</i>      | Ca_Desig_Chr03               | 6543414                        | (C/T)       |
| 26337       | CadSNP1932     | <i>Desi</i>      | Ca_Desig_Chr03               | 6544021                        | (T/A)       |
| 26338       | CadSNP1933     | <i>Desi</i>      | Ca_Desig_Chr03               | 6544048                        | (C/T)       |
| 26339       | CadSNP1934     | <i>Desi</i>      | Ca_Desig_Chr03               | 6544056                        | (A/G)       |
| 26340       | CadSNP1935     | <i>Desi</i>      | Ca_Desig_Chr03               | 6544127                        | (G/A)       |
| 26341       | CadSNP1936     | <i>Desi</i>      | Ca_Desig_Chr03               | 6547513                        | (A/G)       |
| 26342       | CadSNP1937     | <i>Desi</i>      | Ca_Desig_Chr03               | 6547617                        | (C/A)       |
| 26343       | CadSNP1938     | <i>Desi</i>      | Ca_Desig_Chr03               | 6592195                        | (A/G)       |
| 26344       | CadSNP1939     | <i>Desi</i>      | Ca_Desig_Chr03               | 6593914                        | (G/A)       |
| 26345       | CadSNP1940     | <i>Desi</i>      | Ca_Desig_Chr03               | 6593992                        | (A/G)       |
| 26346       | CadSNP1941     | <i>Desi</i>      | Ca_Desig_Chr03               | 6636057                        | (C/T)       |
| 26347       | CadSNP1942     | <i>Desi</i>      | Ca_Desig_Chr03               | 6641323                        | (G/A)       |
| 26348       | CadSNP1943     | <i>Desi</i>      | Ca_Desig_Chr03               | 6721053                        | (T/A)       |
| 26349       | CadSNP1944     | <i>Desi</i>      | Ca_Desig_Chr03               | 6723774                        | (T/A)       |
| 26350       | CadSNP1945     | <i>Desi</i>      | Ca_Desig_Chr03               | 6723852                        | (C/G)       |
| 26351       | CadSNP1946     | <i>Desi</i>      | Ca_Desig_Chr03               | 6723839                        | (G/A)       |
| 26352       | CadSNP1947     | <i>Desi</i>      | Ca_Desig_Chr03               | 6723814                        | (A/G)       |
| 26353       | CadSNP1948     | <i>Desi</i>      | Ca_Desig_Chr03               | 6738215                        | (A/T)       |
| 26354       | CadSNP1949     | <i>Desi</i>      | Ca_Desig_Chr03               | 6739004                        | (A/G)       |
| 26355       | CadSNP1950     | <i>Desi</i>      | Ca_Desig_Chr03               | 6738992                        | (G/A)       |
| 26356       | CadSNP1951     | <i>Desi</i>      | Ca_Desig_Chr03               | 6758389                        | (T/C)       |
| 26357       | CadSNP1952     | <i>Desi</i>      | Ca_Desig_Chr03               | 6758514                        | (T/C)       |
| 26358       | CadSNP1953     | <i>Desi</i>      | Ca_Desig_Chr03               | 6758461                        | (C/T)       |
| 26359       | CadSNP1954     | <i>Desi</i>      | Ca_Desig_Chr03               | 6776135                        | (G/A)       |
| 26360       | CadSNP1955     | <i>Desi</i>      | Ca_Desig_Chr03               | 6776192                        | (A/G)       |
| 26361       | CadSNP1956     | <i>Desi</i>      | Ca_Desig_Chr03               | 6776469                        | (T/C)       |
| 26362       | CadSNP1957     | <i>Desi</i>      | Ca_Desig_Chr03               | 6776529                        | (C/T)       |
| 26363       | CadSNP1958     | <i>Desi</i>      | Ca_Desig_Chr03               | 6790404                        | (G/A)       |
| 26364       | CadSNP1959     | <i>Desi</i>      | Ca_Desig_Chr03               | 6790441                        | (T/G)       |
| 26365       | CadSNP1960     | <i>Desi</i>      | Ca_Desig_Chr03               | 6790700                        | (G/A)       |
| 26366       | CadSNP1961     | <i>Desi</i>      | Ca_Desig_Chr03               | 6790766                        | (G/T)       |
| 26367       | CadSNP1962     | <i>Desi</i>      | Ca_Desig_Chr03               | 6799069                        | (G/A)       |
| 26368       | CadSNP1963     | <i>Desi</i>      | Ca_Desig_Chr03               | 6799079                        | (G/C)       |
| 26369       | CadSNP1964     | <i>Desi</i>      | Ca_Desig_Chr03               | 6799080                        | (A/G)       |
| 26370       | CadSNP1965     | <i>Desi</i>      | Ca_Desig_Chr03               | 6799092                        | (A/T)       |
| 26371       | CadSNP1966     | <i>Desi</i>      | Ca_Desig_Chr03               | 6799102                        | (C/T)       |



| <b>S.N.</b> | <b>SNP IDs</b> | <b>Cultivars</b> | <b>Chromosomes/scaffolds</b> | <b>Physical positions (bp)</b> | <b>SNPs</b> |
|-------------|----------------|------------------|------------------------------|--------------------------------|-------------|
| 26372       | CadSNP1967     | <i>Desi</i>      | Ca_Desig_Chr03               | 6799103                        | (C/T)       |
| 26373       | CadSNP1968     | <i>Desi</i>      | Ca_Desig_Chr03               | 6799104                        | (G/C)       |
| 26374       | CadSNP1969     | <i>Desi</i>      | Ca_Desig_Chr03               | 6799108                        | (A/G)       |
| 26375       | CadSNP1970     | <i>Desi</i>      | Ca_Desig_Chr03               | 6799122                        | (T/C)       |
| 26376       | CadSNP1971     | <i>Desi</i>      | Ca_Desig_Chr03               | 6799206                        | (G/A)       |
| 26377       | CadSNP1972     | <i>Desi</i>      | Ca_Desig_Chr03               | 6799167                        | (T/C)       |
| 26378       | CadSNP1973     | <i>Desi</i>      | Ca_Desig_Chr03               | 6812141                        | (C/T)       |
| 26379       | CadSNP1974     | <i>Desi</i>      | Ca_Desig_Chr03               | 6812138                        | (C/A)       |
| 26380       | CadSNP1975     | <i>Desi</i>      | Ca_Desig_Chr03               | 6812125                        | (C/T)       |
| 26381       | CadSNP1976     | <i>Desi</i>      | Ca_Desig_Chr03               | 6812111                        | (A/G)       |
| 26382       | CadSNP1977     | <i>Desi</i>      | Ca_Desig_Chr03               | 6812104                        | (C/G)       |
| 26383       | CadSNP1978     | <i>Desi</i>      | Ca_Desig_Chr03               | 6812091                        | (G/A)       |
| 26384       | CadSNP1979     | <i>Desi</i>      | Ca_Desig_Chr03               | 6812090                        | (C/T)       |
| 26385       | CadSNP1980     | <i>Desi</i>      | Ca_Desig_Chr03               | 6812089                        | (G/T)       |
| 26386       | CadSNP1981     | <i>Desi</i>      | Ca_Desig_Chr03               | 6812085                        | (G/A)       |
| 26387       | CadSNP1982     | <i>Desi</i>      | Ca_Desig_Chr03               | 6812195                        | (C/T)       |
| 26388       | CadSNP1983     | <i>Desi</i>      | Ca_Desig_Chr03               | 6812249                        | (G/A)       |
| 26389       | CadSNP1984     | <i>Desi</i>      | Ca_Desig_Chr03               | 6812306                        | (A/C)       |
| 26390       | CadSNP1985     | <i>Desi</i>      | Ca_Desig_Chr03               | 6812334                        | (G/A)       |
| 26391       | CadSNP1986     | <i>Desi</i>      | Ca_Desig_Chr03               | 6833787                        | (G/A)       |
| 26392       | CadSNP1987     | <i>Desi</i>      | Ca_Desig_Chr03               | 6833812                        | (C/A)       |
| 26393       | CadSNP1988     | <i>Desi</i>      | Ca_Desig_Chr03               | 6833831                        | (A/G)       |
| 26394       | CadSNP1989     | <i>Desi</i>      | Ca_Desig_Chr03               | 6833840                        | (G/T)       |
| 26395       | CadSNP1990     | <i>Desi</i>      | Ca_Desig_Chr03               | 7012818                        | (T/C)       |
| 26396       | CadSNP1991     | <i>Desi</i>      | Ca_Desig_Chr03               | 7012976                        | (A/G)       |
| 26397       | CadSNP1992     | <i>Desi</i>      | Ca_Desig_Chr03               | 7059071                        | (G/A)       |
| 26398       | CadSNP1993     | <i>Desi</i>      | Ca_Desig_Chr03               | 7059090                        | (A/G)       |
| 26399       | CadSNP1994     | <i>Desi</i>      | Ca_Desig_Chr03               | 7059208                        | (T/C)       |
| 26400       | CadSNP1995     | <i>Desi</i>      | Ca_Desig_Chr03               | 7101708                        | (G/T)       |
| 26401       | CadSNP1996     | <i>Desi</i>      | Ca_Desig_Chr03               | 7101702                        | (T/G)       |
| 26402       | CadSNP1997     | <i>Desi</i>      | Ca_Desig_Chr03               | 7104055                        | (G/A)       |
| 26403       | CadSNP1998     | <i>Desi</i>      | Ca_Desig_Chr03               | 7104519                        | (C/T)       |
| 26404       | CadSNP1999     | <i>Desi</i>      | Ca_Desig_Chr03               | 7104579                        | (T/A)       |
| 26405       | CadSNP2000     | <i>Desi</i>      | Ca_Desig_Chr03               | 7144144                        | (T/A)       |
| 26406       | CadSNP2001     | <i>Desi</i>      | Ca_Desig_Chr03               | 7144200                        | (T/G)       |
| 26407       | CadSNP2002     | <i>Desi</i>      | Ca_Desig_Chr03               | 7177530                        | (C/A)       |
| 26408       | CadSNP2003     | <i>Desi</i>      | Ca_Desig_Chr03               | 7207213                        | (C/G)       |
| 26409       | CadSNP2004     | <i>Desi</i>      | Ca_Desig_Chr03               | 7207239                        | (G/T)       |

| <b>S.N.</b> | <b>SNP IDs</b> | <b>Cultivars</b> | <b>Chromosomes/scaffolds</b> | <b>Physical positions (bp)</b> | <b>SNPs</b> |
|-------------|----------------|------------------|------------------------------|--------------------------------|-------------|
| 26410       | CadSNP2005     | <i>Desi</i>      | Ca_Desig_Chr03               | 7207240                        | (T/G)       |
| 26411       | CadSNP2006     | <i>Desi</i>      | Ca_Desig_Chr03               | 7207270                        | (T/C)       |
| 26412       | CadSNP2007     | <i>Desi</i>      | Ca_Desig_Chr03               | 7207273                        | (A/G)       |
| 26413       | CadSNP2008     | <i>Desi</i>      | Ca_Desig_Chr03               | 7207388                        | (A/C)       |
| 26414       | CadSNP2009     | <i>Desi</i>      | Ca_Desig_Chr03               | 7207370                        | (C/T)       |
| 26415       | CadSNP2010     | <i>Desi</i>      | Ca_Desig_Chr03               | 7207355                        | (A/G)       |
| 26416       | CadSNP2011     | <i>Desi</i>      | Ca_Desig_Chr03               | 7207306                        | (T/G)       |
| 26417       | CadSNP2012     | <i>Desi</i>      | Ca_Desig_Chr03               | 7212795                        | (T/C)       |
| 26418       | CadSNP2013     | <i>Desi</i>      | Ca_Desig_Chr03               | 7212796                        | (T/C)       |
| 26419       | CadSNP2014     | <i>Desi</i>      | Ca_Desig_Chr03               | 7218359                        | (A/C)       |
| 26420       | CadSNP2015     | <i>Desi</i>      | Ca_Desig_Chr03               | 7234381                        | (A/T)       |
| 26421       | CadSNP2016     | <i>Desi</i>      | Ca_Desig_Chr03               | 7241614                        | (G/A)       |
| 26422       | CadSNP2017     | <i>Desi</i>      | Ca_Desig_Chr03               | 7241639                        | (A/G)       |
| 26423       | CadSNP2018     | <i>Desi</i>      | Ca_Desig_Chr03               | 7241675                        | (G/T)       |
| 26424       | CadSNP2019     | <i>Desi</i>      | Ca_Desig_Chr03               | 8455273                        | (A/T)       |
| 26425       | CadSNP2020     | <i>Desi</i>      | Ca_Desig_Chr03               | 8456386                        | (C/A)       |
| 26426       | CadSNP2021     | <i>Desi</i>      | Ca_Desig_Chr03               | 8499689                        | (C/T)       |
| 26427       | CadSNP2022     | <i>Desi</i>      | Ca_Desig_Chr03               | 8540339                        | (T/A)       |
| 26428       | CadSNP2023     | <i>Desi</i>      | Ca_Desig_Chr03               | 8540535                        | (T/C)       |
| 26429       | CadSNP2024     | <i>Desi</i>      | Ca_Desig_Chr03               | 8548425                        | (C/T)       |
| 26430       | CadSNP2025     | <i>Desi</i>      | Ca_Desig_Chr03               | 8556886                        | (G/T)       |
| 26431       | CadSNP2026     | <i>Desi</i>      | Ca_Desig_Chr03               | 8556931                        | (G/T)       |
| 26432       | CadSNP2027     | <i>Desi</i>      | Ca_Desig_Chr03               | 8814590                        | (A/G)       |
| 26433       | CadSNP2028     | <i>Desi</i>      | Ca_Desig_Chr03               | 8815626                        | (A/T)       |
| 26434       | CadSNP2029     | <i>Desi</i>      | Ca_Desig_Chr03               | 8815663                        | (C/T)       |
| 26435       | CadSNP2030     | <i>Desi</i>      | Ca_Desig_Chr03               | 8815664                        | (G/A)       |
| 26436       | CadSNP2031     | <i>Desi</i>      | Ca_Desig_Chr03               | 8815694                        | (G/A)       |
| 26437       | CadSNP2032     | <i>Desi</i>      | Ca_Desig_Chr03               | 8826351                        | (G/C)       |
| 26438       | CadSNP2033     | <i>Desi</i>      | Ca_Desig_Chr03               | 8826641                        | (A/G)       |
| 26439       | CadSNP2034     | <i>Desi</i>      | Ca_Desig_Chr03               | 8828383                        | (C/T)       |
| 26440       | CadSNP2035     | <i>Desi</i>      | Ca_Desig_Chr03               | 8844120                        | (T/C)       |
| 26441       | CadSNP2036     | <i>Desi</i>      | Ca_Desig_Chr03               | 8844165                        | (G/A)       |
| 26442       | CadSNP2037     | <i>Desi</i>      | Ca_Desig_Chr03               | 8844171                        | (C/T)       |
| 26443       | CadSNP2038     | <i>Desi</i>      | Ca_Desig_Chr03               | 8844245                        | (C/A)       |
| 26444       | CadSNP2039     | <i>Desi</i>      | Ca_Desig_Chr03               | 8852584                        | (C/T)       |
| 26445       | CadSNP2040     | <i>Desi</i>      | Ca_Desig_Chr03               | 8907433                        | (T/G)       |
| 26446       | CadSNP2041     | <i>Desi</i>      | Ca_Desig_Chr03               | 8907468                        | (T/C)       |
| 26447       | CadSNP2042     | <i>Desi</i>      | Ca_Desig_Chr03               | 8907459                        | (A/G)       |

| <b>S.N.</b> | <b>SNP IDs</b> | <b>Cultivars</b> | <b>Chromosomes/scaffolds</b> | <b>Physical positions (bp)</b> | <b>SNPs</b> |
|-------------|----------------|------------------|------------------------------|--------------------------------|-------------|
| 26448       | CadSNP2043     | <i>Desi</i>      | Ca_Desig_Chr03               | 8907661                        | (C/T)       |
| 26449       | CadSNP2044     | <i>Desi</i>      | Ca_Desig_Chr03               | 8989825                        | (A/T)       |
| 26450       | CadSNP2045     | <i>Desi</i>      | Ca_Desig_Chr03               | 9852607                        | (T/A)       |
| 26451       | CadSNP2046     | <i>Desi</i>      | Ca_Desig_Chr03               | 9934450                        | (C/A)       |
| 26452       | CadSNP2047     | <i>Desi</i>      | Ca_Desig_Chr03               | 9934613                        | (A/G)       |
| 26453       | CadSNP2048     | <i>Desi</i>      | Ca_Desig_Chr03               | 9938011                        | (A/T)       |
| 26454       | CadSNP2049     | <i>Desi</i>      | Ca_Desig_Chr03               | 10075249                       | (G/A)       |
| 26455       | CadSNP2050     | <i>Desi</i>      | Ca_Desig_Chr03               | 10078325                       | (A/C)       |
| 26456       | CadSNP2051     | <i>Desi</i>      | Ca_Desig_Chr03               | 10247487                       | (C/G)       |
| 26457       | CadSNP2052     | <i>Desi</i>      | Ca_Desig_Chr03               | 10304204                       | (T/A)       |
| 26458       | CadSNP2053     | <i>Desi</i>      | Ca_Desig_Chr03               | 10304224                       | (A/T)       |
| 26459       | CadSNP2054     | <i>Desi</i>      | Ca_Desig_Chr03               | 10304244                       | (C/A)       |
| 26460       | CadSNP2055     | <i>Desi</i>      | Ca_Desig_Chr03               | 10308956                       | (A/C)       |
| 26461       | CadSNP2056     | <i>Desi</i>      | Ca_Desig_Chr03               | 10349421                       | (A/G)       |
| 26462       | CadSNP2057     | <i>Desi</i>      | Ca_Desig_Chr03               | 10350151                       | (C/T)       |
| 26463       | CadSNP2058     | <i>Desi</i>      | Ca_Desig_Chr03               | 10350133                       | (G/T)       |
| 26464       | CadSNP2059     | <i>Desi</i>      | Ca_Desig_Chr03               | 10387956                       | (A/G)       |
| 26465       | CadSNP2060     | <i>Desi</i>      | Ca_Desig_Chr03               | 10388061                       | (T/C)       |
| 26466       | CadSNP2061     | <i>Desi</i>      | Ca_Desig_Chr03               | 10389534                       | (T/G)       |
| 26467       | CadSNP2062     | <i>Desi</i>      | Ca_Desig_Chr03               | 10413004                       | (A/C)       |
| 26468       | CadSNP2063     | <i>Desi</i>      | Ca_Desig_Chr03               | 10468011                       | (C/T)       |
| 26469       | CadSNP2064     | <i>Desi</i>      | Ca_Desig_Chr03               | 10509285                       | (A/T)       |
| 26470       | CadSNP2065     | <i>Desi</i>      | Ca_Desig_Chr03               | 10509304                       | (T/C)       |
| 26471       | CadSNP2066     | <i>Desi</i>      | Ca_Desig_Chr03               | 10509352                       | (C/A)       |
| 26472       | CadSNP2067     | <i>Desi</i>      | Ca_Desig_Chr03               | 10509908                       | (T/G)       |
| 26473       | CadSNP2068     | <i>Desi</i>      | Ca_Desig_Chr03               | 10509938                       | (A/C)       |
| 26474       | CadSNP2069     | <i>Desi</i>      | Ca_Desig_Chr03               | 10597811                       | (T/G)       |
| 26475       | CadSNP2070     | <i>Desi</i>      | Ca_Desig_Chr03               | 10597847                       | (C/T)       |
| 26476       | CadSNP2071     | <i>Desi</i>      | Ca_Desig_Chr03               | 10641927                       | (G/A)       |
| 26477       | CadSNP2072     | <i>Desi</i>      | Ca_Desig_Chr03               | 10656917                       | (G/A)       |
| 26478       | CadSNP2073     | <i>Desi</i>      | Ca_Desig_Chr03               | 10676655                       | (G/A)       |
| 26479       | CadSNP2074     | <i>Desi</i>      | Ca_Desig_Chr03               | 10676659                       | (G/A)       |
| 26480       | CadSNP2075     | <i>Desi</i>      | Ca_Desig_Chr03               | 10811691                       | (G/T)       |
| 26481       | CadSNP2076     | <i>Desi</i>      | Ca_Desig_Chr03               | 10811721                       | (G/C)       |
| 26482       | CadSNP2077     | <i>Desi</i>      | Ca_Desig_Chr03               | 10812216                       | (G/A)       |
| 26483       | CadSNP2078     | <i>Desi</i>      | Ca_Desig_Chr03               | 10832501                       | (T/G)       |
| 26484       | CadSNP2079     | <i>Desi</i>      | Ca_Desig_Chr03               | 10869140                       | (G/A)       |
| 26485       | CadSNP2080     | <i>Desi</i>      | Ca_Desig_Chr03               | 10881083                       | (C/T)       |

| <b>S.N.</b> | <b>SNP IDs</b> | <b>Cultivars</b> | <b>Chromosomes/scaffolds</b> | <b>Physical positions (bp)</b> | <b>SNPs</b> |
|-------------|----------------|------------------|------------------------------|--------------------------------|-------------|
| 26486       | CadSNP2081     | <i>Desi</i>      | Ca_Desig_Chr03               | 10915073                       | (G/A)       |
| 26487       | CadSNP2082     | <i>Desi</i>      | Ca_Desig_Chr03               | 11064391                       | (C/G)       |
| 26488       | CadSNP2083     | <i>Desi</i>      | Ca_Desig_Chr03               | 11115658                       | (G/A)       |
| 26489       | CadSNP2084     | <i>Desi</i>      | Ca_Desig_Chr03               | 11121805                       | (G/T)       |
| 26490       | CadSNP2085     | <i>Desi</i>      | Ca_Desig_Chr03               | 11121776                       | (T/C)       |
| 26491       | CadSNP2086     | <i>Desi</i>      | Ca_Desig_Chr03               | 11146489                       | (T/C)       |
| 26492       | CadSNP2087     | <i>Desi</i>      | Ca_Desig_Chr03               | 11146442                       | (A/C)       |
| 26493       | CadSNP2088     | <i>Desi</i>      | Ca_Desig_Chr03               | 11147829                       | (G/C)       |
| 26494       | CadSNP2089     | <i>Desi</i>      | Ca_Desig_Chr03               | 11147853                       | (T/G)       |
| 26495       | CadSNP2090     | <i>Desi</i>      | Ca_Desig_Chr03               | 11148357                       | (C/T)       |
| 26496       | CadSNP2091     | <i>Desi</i>      | Ca_Desig_Chr03               | 11163988                       | (C/T)       |
| 26497       | CadSNP2092     | <i>Desi</i>      | Ca_Desig_Chr03               | 11220397                       | (T/C)       |
| 26498       | CadSNP2093     | <i>Desi</i>      | Ca_Desig_Chr03               | 11223968                       | (C/G)       |
| 26499       | CadSNP2094     | <i>Desi</i>      | Ca_Desig_Chr03               | 11251354                       | (C/T)       |
| 26500       | CadSNP2095     | <i>Desi</i>      | Ca_Desig_Chr03               | 11251333                       | (A/C)       |
| 26501       | CadSNP2096     | <i>Desi</i>      | Ca_Desig_Chr03               | 11295835                       | (C/T)       |
| 26502       | CadSNP2097     | <i>Desi</i>      | Ca_Desig_Chr03               | 11330443                       | (T/G)       |
| 26503       | CadSNP2098     | <i>Desi</i>      | Ca_Desig_Chr03               | 11370420                       | (G/A)       |
| 26504       | CadSNP2099     | <i>Desi</i>      | Ca_Desig_Chr03               | 11390003                       | (A/G)       |
| 26505       | CadSNP2100     | <i>Desi</i>      | Ca_Desig_Chr03               | 11390004                       | (T/C)       |
| 26506       | CadSNP2101     | <i>Desi</i>      | Ca_Desig_Chr03               | 11390007                       | (C/T)       |
| 26507       | CadSNP2102     | <i>Desi</i>      | Ca_Desig_Chr03               | 11390016                       | (C/A)       |
| 26508       | CadSNP2103     | <i>Desi</i>      | Ca_Desig_Chr03               | 11390049                       | (A/G)       |
| 26509       | CadSNP2104     | <i>Desi</i>      | Ca_Desig_Chr03               | 11390057                       | (A/G)       |
| 26510       | CadSNP2105     | <i>Desi</i>      | Ca_Desig_Chr03               | 11390970                       | (A/C)       |
| 26511       | CadSNP2106     | <i>Desi</i>      | Ca_Desig_Chr03               | 11392062                       | (A/G)       |
| 26512       | CadSNP2107     | <i>Desi</i>      | Ca_Desig_Chr03               | 11392061                       | (C/T)       |
| 26513       | CadSNP2108     | <i>Desi</i>      | Ca_Desig_Chr03               | 11392059                       | (G/A)       |
| 26514       | CadSNP2109     | <i>Desi</i>      | Ca_Desig_Chr03               | 11392056                       | (G/A)       |
| 26515       | CadSNP2110     | <i>Desi</i>      | Ca_Desig_Chr03               | 11392049                       | (A/G)       |
| 26516       | CadSNP2111     | <i>Desi</i>      | Ca_Desig_Chr03               | 11392045                       | (T/A)       |
| 26517       | CadSNP2112     | <i>Desi</i>      | Ca_Desig_Chr03               | 11392037                       | (T/C)       |
| 26518       | CadSNP2113     | <i>Desi</i>      | Ca_Desig_Chr03               | 11392024                       | (T/C)       |
| 26519       | CadSNP2114     | <i>Desi</i>      | Ca_Desig_Chr03               | 11396406                       | (A/C)       |
| 26520       | CadSNP2115     | <i>Desi</i>      | Ca_Desig_Chr03               | 11396407                       | (T/A)       |
| 26521       | CadSNP2116     | <i>Desi</i>      | Ca_Desig_Chr03               | 11400666                       | (A/C)       |
| 26522       | CadSNP2117     | <i>Desi</i>      | Ca_Desig_Chr03               | 11404484                       | (C/G)       |
| 26523       | CadSNP2118     | <i>Desi</i>      | Ca_Desig_Chr03               | 11404536                       | (G/A)       |

| <b>S.N.</b> | <b>SNP IDs</b> | <b>Cultivars</b> | <b>Chromosomes/scaffolds</b> | <b>Physical positions (bp)</b> | <b>SNPs</b> |
|-------------|----------------|------------------|------------------------------|--------------------------------|-------------|
| 26524       | CadSNP2119     | <i>Desi</i>      | Ca_Desig_Chr03               | 11418718                       | (G/A)       |
| 26525       | CadSNP2120     | <i>Desi</i>      | Ca_Desig_Chr03               | 11418716                       | (T/C)       |
| 26526       | CadSNP2121     | <i>Desi</i>      | Ca_Desig_Chr03               | 11418710                       | (C/A)       |
| 26527       | CadSNP2122     | <i>Desi</i>      | Ca_Desig_Chr03               | 11418707                       | (T/A)       |
| 26528       | CadSNP2123     | <i>Desi</i>      | Ca_Desig_Chr03               | 11418699                       | (T/C)       |
| 26529       | CadSNP2124     | <i>Desi</i>      | Ca_Desig_Chr03               | 11432450                       | (G/A)       |
| 26530       | CadSNP2125     | <i>Desi</i>      | Ca_Desig_Chr03               | 11437660                       | (A/C)       |
| 26531       | CadSNP2126     | <i>Desi</i>      | Ca_Desig_Chr03               | 11444564                       | (A/C)       |
| 26532       | CadSNP2127     | <i>Desi</i>      | Ca_Desig_Chr03               | 11457594                       | (C/G)       |
| 26533       | CadSNP2128     | <i>Desi</i>      | Ca_Desig_Chr03               | 11457591                       | (G/C)       |
| 26534       | CadSNP2129     | <i>Desi</i>      | Ca_Desig_Chr03               | 11457652                       | (A/C)       |
| 26535       | CadSNP2130     | <i>Desi</i>      | Ca_Desig_Chr03               | 11497356                       | (C/T)       |
| 26536       | CadSNP2131     | <i>Desi</i>      | Ca_Desig_Chr03               | 11547118                       | (A/G)       |
| 26537       | CadSNP2132     | <i>Desi</i>      | Ca_Desig_Chr03               | 11548485                       | (G/A)       |
| 26538       | CadSNP2133     | <i>Desi</i>      | Ca_Desig_Chr03               | 11567306                       | (G/A)       |
| 26539       | CadSNP2134     | <i>Desi</i>      | Ca_Desig_Chr03               | 11567364                       | (A/C)       |
| 26540       | CadSNP2135     | <i>Desi</i>      | Ca_Desig_Chr03               | 11569456                       | (C/T)       |
| 26541       | CadSNP2136     | <i>Desi</i>      | Ca_Desig_Chr03               | 11599239                       | (G/A)       |
| 26542       | CadSNP2137     | <i>Desi</i>      | Ca_Desig_Chr03               | 11599240                       | (A/T)       |
| 26543       | CadSNP2138     | <i>Desi</i>      | Ca_Desig_Chr03               | 11607367                       | (T/C)       |
| 26544       | CadSNP2139     | <i>Desi</i>      | Ca_Desig_Chr03               | 11624139                       | (T/C)       |
| 26545       | CadSNP2140     | <i>Desi</i>      | Ca_Desig_Chr03               | 11625131                       | (C/T)       |
| 26546       | CadSNP2141     | <i>Desi</i>      | Ca_Desig_Chr03               | 11625124                       | (G/A)       |
| 26547       | CadSNP2142     | <i>Desi</i>      | Ca_Desig_Chr03               | 11656953                       | (A/G)       |
| 26548       | CadSNP2143     | <i>Desi</i>      | Ca_Desig_Chr03               | 11656922                       | (T/G)       |
| 26549       | CadSNP2144     | <i>Desi</i>      | Ca_Desig_Chr03               | 11676785                       | (A/G)       |
| 26550       | CadSNP2145     | <i>Desi</i>      | Ca_Desig_Chr03               | 11676764                       | (A/G)       |
| 26551       | CadSNP2146     | <i>Desi</i>      | Ca_Desig_Chr03               | 11722037                       | (T/C)       |
| 26552       | CadSNP2147     | <i>Desi</i>      | Ca_Desig_Chr03               | 11728702                       | (A/C)       |
| 26553       | CadSNP2148     | <i>Desi</i>      | Ca_Desig_Chr03               | 11728698                       | (A/G)       |
| 26554       | CadSNP2149     | <i>Desi</i>      | Ca_Desig_Chr03               | 11740570                       | (C/T)       |
| 26555       | CadSNP2150     | <i>Desi</i>      | Ca_Desig_Chr03               | 11740579                       | (T/C)       |
| 26556       | CadSNP2151     | <i>Desi</i>      | Ca_Desig_Chr03               | 11740600                       | (C/A)       |
| 26557       | CadSNP2152     | <i>Desi</i>      | Ca_Desig_Chr03               | 11740672                       | (C/T)       |
| 26558       | CadSNP2153     | <i>Desi</i>      | Ca_Desig_Chr03               | 11740669                       | (A/G)       |
| 26559       | CadSNP2154     | <i>Desi</i>      | Ca_Desig_Chr03               | 11748297                       | (T/A)       |
| 26560       | CadSNP2155     | <i>Desi</i>      | Ca_Desig_Chr03               | 11781845                       | (C/T)       |
| 26561       | CadSNP2156     | <i>Desi</i>      | Ca_Desig_Chr03               | 11782814                       | (G/T)       |

| <b>S.N.</b> | <b>SNP IDs</b> | <b>Cultivars</b> | <b>Chromosomes/scaffolds</b> | <b>Physical positions (bp)</b> | <b>SNPs</b> |
|-------------|----------------|------------------|------------------------------|--------------------------------|-------------|
| 26562       | CadSNP2157     | <i>Desi</i>      | Ca_Desig_Chr03               | 11783341                       | (C/A)       |
| 26563       | CadSNP2158     | <i>Desi</i>      | Ca_Desig_Chr03               | 11783336                       | (C/A)       |
| 26564       | CadSNP2159     | <i>Desi</i>      | Ca_Desig_Chr03               | 11783335                       | (G/A)       |
| 26565       | CadSNP2160     | <i>Desi</i>      | Ca_Desig_Chr03               | 11783334                       | (T/C)       |
| 26566       | CadSNP2161     | <i>Desi</i>      | Ca_Desig_Chr03               | 11783331                       | (C/T)       |
| 26567       | CadSNP2162     | <i>Desi</i>      | Ca_Desig_Chr03               | 11783328                       | (C/T)       |
| 26568       | CadSNP2163     | <i>Desi</i>      | Ca_Desig_Chr03               | 11828957                       | (C/A)       |
| 26569       | CadSNP2164     | <i>Desi</i>      | Ca_Desig_Chr03               | 11900779                       | (G/A)       |
| 26570       | CadSNP2165     | <i>Desi</i>      | Ca_Desig_Chr03               | 11900840                       | (T/C)       |
| 26571       | CadSNP2166     | <i>Desi</i>      | Ca_Desig_Chr03               | 11900841                       | (G/A)       |
| 26572       | CadSNP2167     | <i>Desi</i>      | Ca_Desig_Chr03               | 11900930                       | (T/A)       |
| 26573       | CadSNP2168     | <i>Desi</i>      | Ca_Desig_Chr03               | 11900889                       | (A/G)       |
| 26574       | CadSNP2169     | <i>Desi</i>      | Ca_Desig_Chr03               | 11900887                       | (T/C)       |
| 26575       | CadSNP2170     | <i>Desi</i>      | Ca_Desig_Chr03               | 11974197                       | (T/C)       |
| 26576       | CadSNP2171     | <i>Desi</i>      | Ca_Desig_Chr03               | 11974244                       | (A/T)       |
| 26577       | CadSNP2172     | <i>Desi</i>      | Ca_Desig_Chr03               | 11974241                       | (G/T)       |
| 26578       | CadSNP2173     | <i>Desi</i>      | Ca_Desig_Chr03               | 11974238                       | (A/G)       |
| 26579       | CadSNP2174     | <i>Desi</i>      | Ca_Desig_Chr03               | 12051872                       | (G/C)       |
| 26580       | CadSNP2175     | <i>Desi</i>      | Ca_Desig_Chr03               | 12051878                       | (A/C)       |
| 26581       | CadSNP2176     | <i>Desi</i>      | Ca_Desig_Chr03               | 12095970                       | (G/T)       |
| 26582       | CadSNP2177     | <i>Desi</i>      | Ca_Desig_Chr03               | 12096007                       | (C/T)       |
| 26583       | CadSNP2178     | <i>Desi</i>      | Ca_Desig_Chr03               | 12096018                       | (G/T)       |
| 26584       | CadSNP2179     | <i>Desi</i>      | Ca_Desig_Chr03               | 12163332                       | (T/C)       |
| 26585       | CadSNP2180     | <i>Desi</i>      | Ca_Desig_Chr03               | 12163323                       | (G/A)       |
| 26586       | CadSNP2181     | <i>Desi</i>      | Ca_Desig_Chr03               | 12277447                       | (C/G)       |
| 26587       | CadSNP2182     | <i>Desi</i>      | Ca_Desig_Chr03               | 12277580                       | (A/G)       |
| 26588       | CadSNP2183     | <i>Desi</i>      | Ca_Desig_Chr03               | 12277558                       | (A/G)       |
| 26589       | CadSNP2184     | <i>Desi</i>      | Ca_Desig_Chr03               | 12353499                       | (A/G)       |
| 26590       | CadSNP2185     | <i>Desi</i>      | Ca_Desig_Chr03               | 12354035                       | (A/G)       |
| 26591       | CadSNP2186     | <i>Desi</i>      | Ca_Desig_Chr03               | 12385670                       | (G/T)       |
| 26592       | CadSNP2187     | <i>Desi</i>      | Ca_Desig_Chr03               | 12386707                       | (A/G)       |
| 26593       | CadSNP2188     | <i>Desi</i>      | Ca_Desig_Chr03               | 12387498                       | (G/T)       |
| 26594       | CadSNP2189     | <i>Desi</i>      | Ca_Desig_Chr03               | 12388427                       | (T/C)       |
| 26595       | CadSNP2190     | <i>Desi</i>      | Ca_Desig_Chr03               | 12388434                       | (C/T)       |
| 26596       | CadSNP2191     | <i>Desi</i>      | Ca_Desig_Chr03               | 12389294                       | (G/A)       |
| 26597       | CadSNP2192     | <i>Desi</i>      | Ca_Desig_Chr03               | 12389297                       | (G/A)       |
| 26598       | CadSNP2193     | <i>Desi</i>      | Ca_Desig_Chr03               | 12389303                       | (C/T)       |
| 26599       | CadSNP2194     | <i>Desi</i>      | Ca_Desig_Chr03               | 12399041                       | (C/T)       |

| <b>S.N.</b> | <b>SNP IDs</b> | <b>Cultivars</b> | <b>Chromosomes/scaffolds</b> | <b>Physical positions (bp)</b> | <b>SNPs</b> |
|-------------|----------------|------------------|------------------------------|--------------------------------|-------------|
| 26600       | CadSNP2195     | <i>Desi</i>      | Ca_Desig_Chr03               | 12399107                       | (T/A)       |
| 26601       | CadSNP2196     | <i>Desi</i>      | Ca_Desig_Chr03               | 12401439                       | (C/G)       |
| 26602       | CadSNP2197     | <i>Desi</i>      | Ca_Desig_Chr03               | 12401650                       | (T/C)       |
| 26603       | CadSNP2198     | <i>Desi</i>      | Ca_Desig_Chr03               | 12460531                       | (T/C)       |
| 26604       | CadSNP2199     | <i>Desi</i>      | Ca_Desig_Chr03               | 12472072                       | (G/A)       |
| 26605       | CadSNP2200     | <i>Desi</i>      | Ca_Desig_Chr03               | 12498074                       | (G/A)       |
| 26606       | CadSNP2201     | <i>Desi</i>      | Ca_Desig_Chr03               | 12535870                       | (T/C)       |
| 26607       | CadSNP2202     | <i>Desi</i>      | Ca_Desig_Chr03               | 12535887                       | (T/C)       |
| 26608       | CadSNP2203     | <i>Desi</i>      | Ca_Desig_Chr03               | 12535894                       | (C/T)       |
| 26609       | CadSNP2204     | <i>Desi</i>      | Ca_Desig_Chr03               | 12535919                       | (G/A)       |
| 26610       | CadSNP2205     | <i>Desi</i>      | Ca_Desig_Chr03               | 12543791                       | (G/A)       |
| 26611       | CadSNP2206     | <i>Desi</i>      | Ca_Desig_Chr03               | 12543837                       | (A/C)       |
| 26612       | CadSNP2207     | <i>Desi</i>      | Ca_Desig_Chr03               | 12863764                       | (C/T)       |
| 26613       | CadSNP2208     | <i>Desi</i>      | Ca_Desig_Chr03               | 12863779                       | (T/C)       |
| 26614       | CadSNP2209     | <i>Desi</i>      | Ca_Desig_Chr03               | 12863789                       | (C/A)       |
| 26615       | CadSNP2210     | <i>Desi</i>      | Ca_Desig_Chr03               | 12863810                       | (C/T)       |
| 26616       | CadSNP2211     | <i>Desi</i>      | Ca_Desig_Chr03               | 12863812                       | (C/T)       |
| 26617       | CadSNP2212     | <i>Desi</i>      | Ca_Desig_Chr03               | 12897333                       | (T/A)       |
| 26618       | CadSNP2213     | <i>Desi</i>      | Ca_Desig_Chr03               | 12897345                       | (C/G)       |
| 26619       | CadSNP2214     | <i>Desi</i>      | Ca_Desig_Chr03               | 12930500                       | (C/A)       |
| 26620       | CadSNP2215     | <i>Desi</i>      | Ca_Desig_Chr03               | 12930626                       | (C/T)       |
| 26621       | CadSNP2216     | <i>Desi</i>      | Ca_Desig_Chr03               | 12979506                       | (T/C)       |
| 26622       | CadSNP2217     | <i>Desi</i>      | Ca_Desig_Chr03               | 12979551                       | (C/A)       |
| 26623       | CadSNP2218     | <i>Desi</i>      | Ca_Desig_Chr03               | 13008395                       | (A/C)       |
| 26624       | CadSNP2219     | <i>Desi</i>      | Ca_Desig_Chr03               | 13191097                       | (A/T)       |
| 26625       | CadSNP2220     | <i>Desi</i>      | Ca_Desig_Chr03               | 13191072                       | (C/G)       |
| 26626       | CadSNP2221     | <i>Desi</i>      | Ca_Desig_Chr03               | 13191049                       | (A/G)       |
| 26627       | CadSNP2222     | <i>Desi</i>      | Ca_Desig_Chr03               | 13207036                       | (C/A)       |
| 26628       | CadSNP2223     | <i>Desi</i>      | Ca_Desig_Chr03               | 13208922                       | (T/G)       |
| 26629       | CadSNP2224     | <i>Desi</i>      | Ca_Desig_Chr03               | 13407432                       | (T/A)       |
| 26630       | CadSNP2225     | <i>Desi</i>      | Ca_Desig_Chr03               | 13407459                       | (T/G)       |
| 26631       | CadSNP2226     | <i>Desi</i>      | Ca_Desig_Chr03               | 13423127                       | (T/G)       |
| 26632       | CadSNP2227     | <i>Desi</i>      | Ca_Desig_Chr03               | 13517775                       | (T/C)       |
| 26633       | CadSNP2228     | <i>Desi</i>      | Ca_Desig_Chr03               | 13517888                       | (C/T)       |
| 26634       | CadSNP2229     | <i>Desi</i>      | Ca_Desig_Chr03               | 13518296                       | (A/G)       |
| 26635       | CadSNP2230     | <i>Desi</i>      | Ca_Desig_Chr03               | 13538576                       | (A/C)       |
| 26636       | CadSNP2231     | <i>Desi</i>      | Ca_Desig_Chr03               | 13664273                       | (G/A)       |
| 26637       | CadSNP2232     | <i>Desi</i>      | Ca_Desig_Chr03               | 13664267                       | (A/G)       |

| <b>S.N.</b> | <b>SNP IDs</b> | <b>Cultivars</b> | <b>Chromosomes/scaffolds</b> | <b>Physical positions (bp)</b> | <b>SNPs</b> |
|-------------|----------------|------------------|------------------------------|--------------------------------|-------------|
| 26638       | CadSNP2233     | <i>Desi</i>      | Ca_Desig_Chr03               | 13664213                       | (A/C)       |
| 26639       | CadSNP2234     | <i>Desi</i>      | Ca_Desig_Chr03               | 13825261                       | (G/A)       |
| 26640       | CadSNP2235     | <i>Desi</i>      | Ca_Desig_Chr03               | 13839597                       | (C/T)       |
| 26641       | CadSNP2236     | <i>Desi</i>      | Ca_Desig_Chr03               | 13841817                       | (T/C)       |
| 26642       | CadSNP2237     | <i>Desi</i>      | Ca_Desig_Chr03               | 13841895                       | (A/C)       |
| 26643       | CadSNP2238     | <i>Desi</i>      | Ca_Desig_Chr03               | 13866595                       | (G/T)       |
| 26644       | CadSNP2239     | <i>Desi</i>      | Ca_Desig_Chr03               | 13892242                       | (T/C)       |
| 26645       | CadSNP2240     | <i>Desi</i>      | Ca_Desig_Chr03               | 13894638                       | (T/A)       |
| 26646       | CadSNP2241     | <i>Desi</i>      | Ca_Desig_Chr03               | 13909204                       | (C/T)       |
| 26647       | CadSNP2242     | <i>Desi</i>      | Ca_Desig_Chr03               | 13909208                       | (A/C)       |
| 26648       | CadSNP2243     | <i>Desi</i>      | Ca_Desig_Chr03               | 13909226                       | (T/C)       |
| 26649       | CadSNP2244     | <i>Desi</i>      | Ca_Desig_Chr03               | 13909264                       | (A/T)       |
| 26650       | CadSNP2245     | <i>Desi</i>      | Ca_Desig_Chr03               | 13994137                       | (A/C)       |
| 26651       | CadSNP2246     | <i>Desi</i>      | Ca_Desig_Chr03               | 14005265                       | (C/T)       |
| 26652       | CadSNP2247     | <i>Desi</i>      | Ca_Desig_Chr03               | 14005543                       | (C/G)       |
| 26653       | CadSNP2248     | <i>Desi</i>      | Ca_Desig_Chr03               | 14005497                       | (T/C)       |
| 26654       | CadSNP2249     | <i>Desi</i>      | Ca_Desig_Chr03               | 14006868                       | (G/A)       |
| 26655       | CadSNP2250     | <i>Desi</i>      | Ca_Desig_Chr03               | 14006814                       | (T/G)       |
| 26656       | CadSNP2251     | <i>Desi</i>      | Ca_Desig_Chr03               | 14172661                       | (C/T)       |
| 26657       | CadSNP2252     | <i>Desi</i>      | Ca_Desig_Chr03               | 14172702                       | (G/A)       |
| 26658       | CadSNP2253     | <i>Desi</i>      | Ca_Desig_Chr03               | 14469822                       | (G/A)       |
| 26659       | CadSNP2254     | <i>Desi</i>      | Ca_Desig_Chr03               | 14469811                       | (T/C)       |
| 26660       | CadSNP2255     | <i>Desi</i>      | Ca_Desig_Chr03               | 14469806                       | (A/G)       |
| 26661       | CadSNP2256     | <i>Desi</i>      | Ca_Desig_Chr03               | 14469801                       | (G/A)       |
| 26662       | CadSNP2257     | <i>Desi</i>      | Ca_Desig_Chr03               | 14469790                       | (C/A)       |
| 26663       | CadSNP2258     | <i>Desi</i>      | Ca_Desig_Chr03               | 14469745                       | (A/T)       |
| 26664       | CadSNP2259     | <i>Desi</i>      | Ca_Desig_Chr03               | 14469761                       | (G/A)       |
| 26665       | CadSNP2260     | <i>Desi</i>      | Ca_Desig_Chr03               | 14490484                       | (C/T)       |
| 26666       | CadSNP2261     | <i>Desi</i>      | Ca_Desig_Chr03               | 14619725                       | (G/A)       |
| 26667       | CadSNP2262     | <i>Desi</i>      | Ca_Desig_Chr03               | 14672190                       | (A/G)       |
| 26668       | CadSNP2263     | <i>Desi</i>      | Ca_Desig_Chr03               | 14694727                       | (A/G)       |
| 26669       | CadSNP2264     | <i>Desi</i>      | Ca_Desig_Chr03               | 14702839                       | (C/T)       |
| 26670       | CadSNP2265     | <i>Desi</i>      | Ca_Desig_Chr03               | 14732794                       | (T/C)       |
| 26671       | CadSNP2266     | <i>Desi</i>      | Ca_Desig_Chr03               | 14733079                       | (G/C)       |
| 26672       | CadSNP2267     | <i>Desi</i>      | Ca_Desig_Chr03               | 14734975                       | (A/C)       |
| 26673       | CadSNP2268     | <i>Desi</i>      | Ca_Desig_Chr03               | 14790196                       | (C/T)       |
| 26674       | CadSNP2269     | <i>Desi</i>      | Ca_Desig_Chr03               | 14817852                       | (G/A)       |
| 26675       | CadSNP2270     | <i>Desi</i>      | Ca_Desig_Chr03               | 14828680                       | (T/A)       |



| <b>S.N.</b> | <b>SNP IDs</b> | <b>Cultivars</b> | <b>Chromosomes/scaffolds</b> | <b>Physical positions (bp)</b> | <b>SNPs</b> |
|-------------|----------------|------------------|------------------------------|--------------------------------|-------------|
| 26676       | CadSNP2271     | <i>Desi</i>      | Ca_Desig_Chr03               | 14828628                       | (T/C)       |
| 26677       | CadSNP2272     | <i>Desi</i>      | Ca_Desig_Chr03               | 14860205                       | (G/T)       |
| 26678       | CadSNP2273     | <i>Desi</i>      | Ca_Desig_Chr03               | 14860342                       | (T/C)       |
| 26679       | CadSNP2274     | <i>Desi</i>      | Ca_Desig_Chr03               | 14890519                       | (G/A)       |
| 26680       | CadSNP2275     | <i>Desi</i>      | Ca_Desig_Chr03               | 14890526                       | (A/G)       |
| 26681       | CadSNP2276     | <i>Desi</i>      | Ca_Desig_Chr03               | 14890671                       | (G/T)       |
| 26682       | CadSNP2277     | <i>Desi</i>      | Ca_Desig_Chr03               | 14890670                       | (T/A)       |
| 26683       | CadSNP2278     | <i>Desi</i>      | Ca_Desig_Chr03               | 14890662                       | (T/G)       |
| 26684       | CadSNP2279     | <i>Desi</i>      | Ca_Desig_Chr03               | 14890652                       | (G/A)       |
| 26685       | CadSNP2280     | <i>Desi</i>      | Ca_Desig_Chr03               | 14890643                       | (C/A)       |
| 26686       | CadSNP2281     | <i>Desi</i>      | Ca_Desig_Chr03               | 14890606                       | (G/T)       |
| 26687       | CadSNP2282     | <i>Desi</i>      | Ca_Desig_Chr03               | 14890599                       | (G/T)       |
| 26688       | CadSNP2283     | <i>Desi</i>      | Ca_Desig_Chr03               | 14927251                       | (G/A)       |
| 26689       | CadSNP2284     | <i>Desi</i>      | Ca_Desig_Chr03               | 15066955                       | (A/G)       |
| 26690       | CadSNP2285     | <i>Desi</i>      | Ca_Desig_Chr03               | 15101360                       | (G/A)       |
| 26691       | CadSNP2286     | <i>Desi</i>      | Ca_Desig_Chr03               | 15101362                       | (G/T)       |
| 26692       | CadSNP2287     | <i>Desi</i>      | Ca_Desig_Chr03               | 15101368                       | (A/G)       |
| 26693       | CadSNP2288     | <i>Desi</i>      | Ca_Desig_Chr03               | 15101369                       | (G/C)       |
| 26694       | CadSNP2289     | <i>Desi</i>      | Ca_Desig_Chr03               | 15101397                       | (G/A)       |
| 26695       | CadSNP2290     | <i>Desi</i>      | Ca_Desig_Chr03               | 15107917                       | (T/C)       |
| 26696       | CadSNP2291     | <i>Desi</i>      | Ca_Desig_Chr03               | 15115080                       | (G/A)       |
| 26697       | CadSNP2292     | <i>Desi</i>      | Ca_Desig_Chr03               | 15115083                       | (T/C)       |
| 26698       | CadSNP2293     | <i>Desi</i>      | Ca_Desig_Chr03               | 15115094                       | (C/T)       |
| 26699       | CadSNP2294     | <i>Desi</i>      | Ca_Desig_Chr03               | 15115099                       | (A/T)       |
| 26700       | CadSNP2295     | <i>Desi</i>      | Ca_Desig_Chr03               | 15115111                       | (C/T)       |
| 26701       | CadSNP2296     | <i>Desi</i>      | Ca_Desig_Chr03               | 15115114                       | (A/T)       |
| 26702       | CadSNP2297     | <i>Desi</i>      | Ca_Desig_Chr03               | 15115115                       | (C/T)       |
| 26703       | CadSNP2298     | <i>Desi</i>      | Ca_Desig_Chr03               | 15115122                       | (A/T)       |
| 26704       | CadSNP2299     | <i>Desi</i>      | Ca_Desig_Chr03               | 15115126                       | (T/C)       |
| 26705       | CadSNP2300     | <i>Desi</i>      | Ca_Desig_Chr03               | 15115128                       | (G/T)       |
| 26706       | CadSNP2301     | <i>Desi</i>      | Ca_Desig_Chr03               | 15115141                       | (T/A)       |
| 26707       | CadSNP2302     | <i>Desi</i>      | Ca_Desig_Chr03               | 15134512                       | (A/G)       |
| 26708       | CadSNP2303     | <i>Desi</i>      | Ca_Desig_Chr03               | 15134527                       | (T/C)       |
| 26709       | CadSNP2304     | <i>Desi</i>      | Ca_Desig_Chr03               | 15134699                       | (G/A)       |
| 26710       | CadSNP2305     | <i>Desi</i>      | Ca_Desig_Chr03               | 15140391                       | (A/G)       |
| 26711       | CadSNP2306     | <i>Desi</i>      | Ca_Desig_Chr03               | 15140451                       | (C/G)       |
| 26712       | CadSNP2307     | <i>Desi</i>      | Ca_Desig_Chr03               | 15140454                       | (A/G)       |
| 26713       | CadSNP2308     | <i>Desi</i>      | Ca_Desig_Chr03               | 15206796                       | (A/T)       |

| <b>S.N.</b> | <b>SNP IDs</b> | <b>Cultivars</b> | <b>Chromosomes/scaffolds</b> | <b>Physical positions (bp)</b> | <b>SNPs</b> |
|-------------|----------------|------------------|------------------------------|--------------------------------|-------------|
| 26714       | CadSNP2309     | <i>Desi</i>      | Ca_Desig_Chr03               | 15281781                       | (C/T)       |
| 26715       | CadSNP2310     | <i>Desi</i>      | Ca_Desig_Chr03               | 15281745                       | (T/C)       |
| 26716       | CadSNP2311     | <i>Desi</i>      | Ca_Desig_Chr03               | 15332475                       | (C/G)       |
| 26717       | CadSNP2312     | <i>Desi</i>      | Ca_Desig_Chr03               | 15332490                       | (C/G)       |
| 26718       | CadSNP2313     | <i>Desi</i>      | Ca_Desig_Chr03               | 15332493                       | (C/A)       |
| 26719       | CadSNP2314     | <i>Desi</i>      | Ca_Desig_Chr03               | 15332539                       | (G/A)       |
| 26720       | CadSNP2315     | <i>Desi</i>      | Ca_Desig_Chr03               | 15376304                       | (G/C)       |
| 26721       | CadSNP2316     | <i>Desi</i>      | Ca_Desig_Chr03               | 15385992                       | (G/C)       |
| 26722       | CadSNP2317     | <i>Desi</i>      | Ca_Desig_Chr03               | 15386093                       | (A/C)       |
| 26723       | CadSNP2318     | <i>Desi</i>      | Ca_Desig_Chr03               | 15386074                       | (T/C)       |
| 26724       | CadSNP2319     | <i>Desi</i>      | Ca_Desig_Chr03               | 15411640                       | (A/T)       |
| 26725       | CadSNP2320     | <i>Desi</i>      | Ca_Desig_Chr03               | 15411677                       | (A/G)       |
| 26726       | CadSNP2321     | <i>Desi</i>      | Ca_Desig_Chr03               | 15412922                       | (A/C)       |
| 26727       | CadSNP2322     | <i>Desi</i>      | Ca_Desig_Chr03               | 15445856                       | (A/G)       |
| 26728       | CadSNP2323     | <i>Desi</i>      | Ca_Desig_Chr03               | 15449309                       | (T/C)       |
| 26729       | CadSNP2324     | <i>Desi</i>      | Ca_Desig_Chr03               | 15458600                       | (C/T)       |
| 26730       | CadSNP2325     | <i>Desi</i>      | Ca_Desig_Chr03               | 15459712                       | (T/G)       |
| 26731       | CadSNP2326     | <i>Desi</i>      | Ca_Desig_Chr03               | 15459709                       | (T/C)       |
| 26732       | CadSNP2327     | <i>Desi</i>      | Ca_Desig_Chr03               | 15466277                       | (A/G)       |
| 26733       | CadSNP2328     | <i>Desi</i>      | Ca_Desig_Chr03               | 15487859                       | (A/T)       |
| 26734       | CadSNP2329     | <i>Desi</i>      | Ca_Desig_Chr03               | 15492126                       | (A/G)       |
| 26735       | CadSNP2330     | <i>Desi</i>      | Ca_Desig_Chr03               | 15497431                       | (A/G)       |
| 26736       | CadSNP2331     | <i>Desi</i>      | Ca_Desig_Chr03               | 15502488                       | (C/T)       |
| 26737       | CadSNP2332     | <i>Desi</i>      | Ca_Desig_Chr03               | 15506011                       | (A/G)       |
| 26738       | CadSNP2333     | <i>Desi</i>      | Ca_Desig_Chr03               | 15505991                       | (C/T)       |
| 26739       | CadSNP2334     | <i>Desi</i>      | Ca_Desig_Chr03               | 15505987                       | (C/A)       |
| 26740       | CadSNP2335     | <i>Desi</i>      | Ca_Desig_Chr03               | 15505983                       | (C/A)       |
| 26741       | CadSNP2336     | <i>Desi</i>      | Ca_Desig_Chr03               | 15813048                       | (C/T)       |
| 26742       | CadSNP2337     | <i>Desi</i>      | Ca_Desig_Chr03               | 15825478                       | (G/A)       |
| 26743       | CadSNP2338     | <i>Desi</i>      | Ca_Desig_Chr03               | 15828104                       | (C/A)       |
| 26744       | CadSNP2339     | <i>Desi</i>      | Ca_Desig_Chr03               | 15835391                       | (T/A)       |
| 26745       | CadSNP2340     | <i>Desi</i>      | Ca_Desig_Chr03               | 15875198                       | (A/G)       |
| 26746       | CadSNP2341     | <i>Desi</i>      | Ca_Desig_Chr03               | 15877087                       | (A/G)       |
| 26747       | CadSNP2342     | <i>Desi</i>      | Ca_Desig_Chr03               | 15877222                       | (T/G)       |
| 26748       | CadSNP2343     | <i>Desi</i>      | Ca_Desig_Chr03               | 15877185                       | (A/G)       |
| 26749       | CadSNP2344     | <i>Desi</i>      | Ca_Desig_Chr03               | 15879088                       | (T/G)       |
| 26750       | CadSNP2345     | <i>Desi</i>      | Ca_Desig_Chr03               | 15885833                       | (G/T)       |
| 26751       | CadSNP2346     | <i>Desi</i>      | Ca_Desig_Chr03               | 15885849                       | (G/T)       |

| <b>S.N.</b> | <b>SNP IDs</b> | <b>Cultivars</b> | <b>Chromosomes/scaffolds</b> | <b>Physical positions (bp)</b> | <b>SNPs</b> |
|-------------|----------------|------------------|------------------------------|--------------------------------|-------------|
| 26752       | CadSNP2347     | <i>Desi</i>      | Ca_Desig_Chr03               | 15946686                       | (T/G)       |
| 26753       | CadSNP2348     | <i>Desi</i>      | Ca_Desig_Chr03               | 15946765                       | (G/C)       |
| 26754       | CadSNP2349     | <i>Desi</i>      | Ca_Desig_Chr03               | 15991427                       | (C/T)       |
| 26755       | CadSNP2350     | <i>Desi</i>      | Ca_Desig_Chr03               | 15991589                       | (T/C)       |
| 26756       | CadSNP2351     | <i>Desi</i>      | Ca_Desig_Chr03               | 16001126                       | (T/A)       |
| 26757       | CadSNP2352     | <i>Desi</i>      | Ca_Desig_Chr03               | 16050465                       | (G/T)       |
| 26758       | CadSNP2353     | <i>Desi</i>      | Ca_Desig_Chr03               | 16050429                       | (G/A)       |
| 26759       | CadSNP2354     | <i>Desi</i>      | Ca_Desig_Chr03               | 16104825                       | (G/T)       |
| 26760       | CadSNP2355     | <i>Desi</i>      | Ca_Desig_Chr03               | 16108691                       | (A/G)       |
| 26761       | CadSNP2356     | <i>Desi</i>      | Ca_Desig_Chr03               | 16137168                       | (G/C)       |
| 26762       | CadSNP2357     | <i>Desi</i>      | Ca_Desig_Chr03               | 16139116                       | (C/T)       |
| 26763       | CadSNP2358     | <i>Desi</i>      | Ca_Desig_Chr03               | 16145409                       | (T/C)       |
| 26764       | CadSNP2359     | <i>Desi</i>      | Ca_Desig_Chr03               | 16145494                       | (C/T)       |
| 26765       | CadSNP2360     | <i>Desi</i>      | Ca_Desig_Chr03               | 16145469                       | (T/A)       |
| 26766       | CadSNP2361     | <i>Desi</i>      | Ca_Desig_Chr03               | 16181589                       | (G/C)       |
| 26767       | CadSNP2362     | <i>Desi</i>      | Ca_Desig_Chr03               | 16181578                       | (G/A)       |
| 26768       | CadSNP2363     | <i>Desi</i>      | Ca_Desig_Chr03               | 16209416                       | (G/A)       |
| 26769       | CadSNP2364     | <i>Desi</i>      | Ca_Desig_Chr03               | 16209498                       | (A/G)       |
| 26770       | CadSNP2365     | <i>Desi</i>      | Ca_Desig_Chr03               | 16218534                       | (T/C)       |
| 26771       | CadSNP2366     | <i>Desi</i>      | Ca_Desig_Chr03               | 16232554                       | (G/A)       |
| 26772       | CadSNP2367     | <i>Desi</i>      | Ca_Desig_Chr03               | 16307552                       | (C/T)       |
| 26773       | CadSNP2368     | <i>Desi</i>      | Ca_Desig_Chr03               | 16337251                       | (C/T)       |
| 26774       | CadSNP2369     | <i>Desi</i>      | Ca_Desig_Chr03               | 16373373                       | (C/A)       |
| 26775       | CadSNP2370     | <i>Desi</i>      | Ca_Desig_Chr03               | 16408351                       | (A/G)       |
| 26776       | CadSNP2371     | <i>Desi</i>      | Ca_Desig_Chr03               | 16408411                       | (A/G)       |
| 26777       | CadSNP2372     | <i>Desi</i>      | Ca_Desig_Chr03               | 16410820                       | (C/T)       |
| 26778       | CadSNP2373     | <i>Desi</i>      | Ca_Desig_Chr03               | 16423933                       | (T/C)       |
| 26779       | CadSNP2374     | <i>Desi</i>      | Ca_Desig_Chr03               | 16429296                       | (G/A)       |
| 26780       | CadSNP2375     | <i>Desi</i>      | Ca_Desig_Chr03               | 16429290                       | (A/G)       |
| 26781       | CadSNP2376     | <i>Desi</i>      | Ca_Desig_Chr03               | 16429260                       | (A/C)       |
| 26782       | CadSNP2377     | <i>Desi</i>      | Ca_Desig_Chr03               | 16429257                       | (A/C)       |
| 26783       | CadSNP2378     | <i>Desi</i>      | Ca_Desig_Chr03               | 16457210                       | (T/C)       |
| 26784       | CadSNP2379     | <i>Desi</i>      | Ca_Desig_Chr03               | 16546902                       | (G/A)       |
| 26785       | CadSNP2380     | <i>Desi</i>      | Ca_Desig_Chr03               | 16588500                       | (A/G)       |
| 26786       | CadSNP2381     | <i>Desi</i>      | Ca_Desig_Chr03               | 16588533                       | (G/C)       |
| 26787       | CadSNP2382     | <i>Desi</i>      | Ca_Desig_Chr03               | 16588555                       | (T/C)       |
| 26788       | CadSNP2383     | <i>Desi</i>      | Ca_Desig_Chr03               | 16588661                       | (T/C)       |
| 26789       | CadSNP2384     | <i>Desi</i>      | Ca_Desig_Chr03               | 16588648                       | (T/G)       |

| <b>S.N.</b> | <b>SNP IDs</b> | <b>Cultivars</b> | <b>Chromosomes/scaffolds</b> | <b>Physical positions (bp)</b> | <b>SNPs</b> |
|-------------|----------------|------------------|------------------------------|--------------------------------|-------------|
| 26790       | CadSNP2385     | <i>Desi</i>      | Ca_Desig_Chr03               | 16588642                       | (T/C)       |
| 26791       | CadSNP2386     | <i>Desi</i>      | Ca_Desig_Chr03               | 16608969                       | (G/A)       |
| 26792       | CadSNP2387     | <i>Desi</i>      | Ca_Desig_Chr03               | 16612390                       | (A/C)       |
| 26793       | CadSNP2388     | <i>Desi</i>      | Ca_Desig_Chr03               | 16612523                       | (G/T)       |
| 26794       | CadSNP2389     | <i>Desi</i>      | Ca_Desig_Chr03               | 16612522                       | (T/A)       |
| 26795       | CadSNP2390     | <i>Desi</i>      | Ca_Desig_Chr03               | 16647962                       | (G/C)       |
| 26796       | CadSNP2391     | <i>Desi</i>      | Ca_Desig_Chr03               | 16650388                       | (T/C)       |
| 26797       | CadSNP2392     | <i>Desi</i>      | Ca_Desig_Chr03               | 16654383                       | (T/C)       |
| 26798       | CadSNP2393     | <i>Desi</i>      | Ca_Desig_Chr03               | 16665981                       | (T/C)       |
| 26799       | CadSNP2394     | <i>Desi</i>      | Ca_Desig_Chr03               | 16665928                       | (G/C)       |
| 26800       | CadSNP2395     | <i>Desi</i>      | Ca_Desig_Chr03               | 16779590                       | (C/T)       |
| 26801       | CadSNP2396     | <i>Desi</i>      | Ca_Desig_Chr03               | 16786527                       | (A/C)       |
| 26802       | CadSNP2397     | <i>Desi</i>      | Ca_Desig_Chr03               | 16829269                       | (G/A)       |
| 26803       | CadSNP2398     | <i>Desi</i>      | Ca_Desig_Chr03               | 16829284                       | (T/C)       |
| 26804       | CadSNP2399     | <i>Desi</i>      | Ca_Desig_Chr03               | 16869021                       | (C/T)       |
| 26805       | CadSNP2400     | <i>Desi</i>      | Ca_Desig_Chr03               | 16885534                       | (C/G)       |
| 26806       | CadSNP2401     | <i>Desi</i>      | Ca_Desig_Chr03               | 16885685                       | (A/G)       |
| 26807       | CadSNP2402     | <i>Desi</i>      | Ca_Desig_Chr03               | 16894386                       | (A/G)       |
| 26808       | CadSNP2403     | <i>Desi</i>      | Ca_Desig_Chr03               | 16894455                       | (G/C)       |
| 26809       | CadSNP2404     | <i>Desi</i>      | Ca_Desig_Chr03               | 16925661                       | (A/C)       |
| 26810       | CadSNP2405     | <i>Desi</i>      | Ca_Desig_Chr03               | 16934270                       | (G/T)       |
| 26811       | CadSNP2406     | <i>Desi</i>      | Ca_Desig_Chr03               | 16934316                       | (T/G)       |
| 26812       | CadSNP2407     | <i>Desi</i>      | Ca_Desig_Chr03               | 16968147                       | (A/C)       |
| 26813       | CadSNP2408     | <i>Desi</i>      | Ca_Desig_Chr03               | 16968093                       | (G/C)       |
| 26814       | CadSNP2409     | <i>Desi</i>      | Ca_Desig_Chr03               | 17011107                       | (C/A)       |
| 26815       | CadSNP2410     | <i>Desi</i>      | Ca_Desig_Chr03               | 17011108                       | (A/G)       |
| 26816       | CadSNP2411     | <i>Desi</i>      | Ca_Desig_Chr03               | 17014193                       | (T/A)       |
| 26817       | CadSNP2412     | <i>Desi</i>      | Ca_Desig_Chr03               | 17088351                       | (A/C)       |
| 26818       | CadSNP2413     | <i>Desi</i>      | Ca_Desig_Chr03               | 17096881                       | (T/G)       |
| 26819       | CadSNP2414     | <i>Desi</i>      | Ca_Desig_Chr03               | 17117877                       | (T/G)       |
| 26820       | CadSNP2415     | <i>Desi</i>      | Ca_Desig_Chr03               | 17135055                       | (A/C)       |
| 26821       | CadSNP2416     | <i>Desi</i>      | Ca_Desig_Chr03               | 17151326                       | (A/T)       |
| 26822       | CadSNP2417     | <i>Desi</i>      | Ca_Desig_Chr03               | 17151439                       | (C/A)       |
| 26823       | CadSNP2418     | <i>Desi</i>      | Ca_Desig_Chr03               | 17160362                       | (G/C)       |
| 26824       | CadSNP2419     | <i>Desi</i>      | Ca_Desig_Chr03               | 17160394                       | (G/T)       |
| 26825       | CadSNP2420     | <i>Desi</i>      | Ca_Desig_Chr03               | 17202494                       | (A/G)       |
| 26826       | CadSNP2421     | <i>Desi</i>      | Ca_Desig_Chr03               | 17296670                       | (A/T)       |
| 26827       | CadSNP2422     | <i>Desi</i>      | Ca_Desig_Chr03               | 17619289                       | (G/C)       |

| <b>S.N.</b> | <b>SNP IDs</b> | <b>Cultivars</b> | <b>Chromosomes/scaffolds</b> | <b>Physical positions (bp)</b> | <b>SNPs</b> |
|-------------|----------------|------------------|------------------------------|--------------------------------|-------------|
| 26828       | CadSNP2423     | <i>Desi</i>      | Ca_Desig_Chr03               | 17619292                       | (T/C)       |
| 26829       | CadSNP2424     | <i>Desi</i>      | Ca_Desig_Chr03               | 17648928                       | (C/T)       |
| 26830       | CadSNP2425     | <i>Desi</i>      | Ca_Desig_Chr03               | 17664224                       | (C/T)       |
| 26831       | CadSNP2426     | <i>Desi</i>      | Ca_Desig_Chr03               | 17681284                       | (G/C)       |
| 26832       | CadSNP2427     | <i>Desi</i>      | Ca_Desig_Chr03               | 17681331                       | (A/G)       |
| 26833       | CadSNP2428     | <i>Desi</i>      | Ca_Desig_Chr03               | 17732900                       | (T/A)       |
| 26834       | CadSNP2429     | <i>Desi</i>      | Ca_Desig_Chr03               | 17732871                       | (C/T)       |
| 26835       | CadSNP2430     | <i>Desi</i>      | Ca_Desig_Chr03               | 17800447                       | (T/C)       |
| 26836       | CadSNP2431     | <i>Desi</i>      | Ca_Desig_Chr03               | 17815074                       | (A/C)       |
| 26837       | CadSNP2432     | <i>Desi</i>      | Ca_Desig_Chr03               | 17815081                       | (A/G)       |
| 26838       | CadSNP2433     | <i>Desi</i>      | Ca_Desig_Chr03               | 17821525                       | (G/A)       |
| 26839       | CadSNP2434     | <i>Desi</i>      | Ca_Desig_Chr03               | 17833336                       | (T/C)       |
| 26840       | CadSNP2435     | <i>Desi</i>      | Ca_Desig_Chr03               | 17838091                       | (T/C)       |
| 26841       | CadSNP2436     | <i>Desi</i>      | Ca_Desig_Chr03               | 17840051                       | (A/C)       |
| 26842       | CadSNP2437     | <i>Desi</i>      | Ca_Desig_Chr03               | 17840040                       | (A/G)       |
| 26843       | CadSNP2438     | <i>Desi</i>      | Ca_Desig_Chr03               | 17847712                       | (G/A)       |
| 26844       | CadSNP2439     | <i>Desi</i>      | Ca_Desig_Chr03               | 17848961                       | (T/C)       |
| 26845       | CadSNP2440     | <i>Desi</i>      | Ca_Desig_Chr03               | 17853430                       | (A/C)       |
| 26846       | CadSNP2441     | <i>Desi</i>      | Ca_Desig_Chr03               | 17853418                       | (C/A)       |
| 26847       | CadSNP2442     | <i>Desi</i>      | Ca_Desig_Chr03               | 17853412                       | (A/G)       |
| 26848       | CadSNP2443     | <i>Desi</i>      | Ca_Desig_Chr03               | 17854089                       | (A/C)       |
| 26849       | CadSNP2444     | <i>Desi</i>      | Ca_Desig_Chr03               | 17855179                       | (G/C)       |
| 26850       | CadSNP2445     | <i>Desi</i>      | Ca_Desig_Chr03               | 17858263                       | (C/A)       |
| 26851       | CadSNP2446     | <i>Desi</i>      | Ca_Desig_Chr03               | 17872943                       | (A/G)       |
| 26852       | CadSNP2447     | <i>Desi</i>      | Ca_Desig_Chr03               | 17872966                       | (A/C)       |
| 26853       | CadSNP2448     | <i>Desi</i>      | Ca_Desig_Chr03               | 17895451                       | (A/G)       |
| 26854       | CadSNP2449     | <i>Desi</i>      | Ca_Desig_Chr03               | 17895430                       | (G/T)       |
| 26855       | CadSNP2450     | <i>Desi</i>      | Ca_Desig_Chr03               | 17920666                       | (C/G)       |
| 26856       | CadSNP2451     | <i>Desi</i>      | Ca_Desig_Chr03               | 17920734                       | (T/C)       |
| 26857       | CadSNP2452     | <i>Desi</i>      | Ca_Desig_Chr03               | 17944044                       | (T/G)       |
| 26858       | CadSNP2453     | <i>Desi</i>      | Ca_Desig_Chr03               | 17944090                       | (A/G)       |
| 26859       | CadSNP2454     | <i>Desi</i>      | Ca_Desig_Chr03               | 17952424                       | (G/T)       |
| 26860       | CadSNP2455     | <i>Desi</i>      | Ca_Desig_Chr03               | 17974469                       | (G/A)       |
| 26861       | CadSNP2456     | <i>Desi</i>      | Ca_Desig_Chr03               | 17974517                       | (T/C)       |
| 26862       | CadSNP2457     | <i>Desi</i>      | Ca_Desig_Chr03               | 17974556                       | (T/G)       |
| 26863       | CadSNP2458     | <i>Desi</i>      | Ca_Desig_Chr03               | 17974550                       | (T/G)       |
| 26864       | CadSNP2459     | <i>Desi</i>      | Ca_Desig_Chr03               | 17974629                       | (A/G)       |
| 26865       | CadSNP2460     | <i>Desi</i>      | Ca_Desig_Chr03               | 17974623                       | (T/C)       |

| <b>S.N.</b> | <b>SNP IDs</b> | <b>Cultivars</b> | <b>Chromosomes/scaffolds</b> | <b>Physical positions (bp)</b> | <b>SNPs</b> |
|-------------|----------------|------------------|------------------------------|--------------------------------|-------------|
| 26866       | CadSNP2461     | <i>Desi</i>      | Ca_Desig_Chr03               | 18004723                       | (G/A)       |
| 26867       | CadSNP2462     | <i>Desi</i>      | Ca_Desig_Chr03               | 18017145                       | (A/C)       |
| 26868       | CadSNP2463     | <i>Desi</i>      | Ca_Desig_Chr03               | 18017201                       | (C/T)       |
| 26869       | CadSNP2464     | <i>Desi</i>      | Ca_Desig_Chr03               | 18017326                       | (A/G)       |
| 26870       | CadSNP2465     | <i>Desi</i>      | Ca_Desig_Chr03               | 18018792                       | (G/A)       |
| 26871       | CadSNP2466     | <i>Desi</i>      | Ca_Desig_Chr03               | 18018827                       | (T/C)       |
| 26872       | CadSNP2467     | <i>Desi</i>      | Ca_Desig_Chr03               | 18021905                       | (C/A)       |
| 26873       | CadSNP2468     | <i>Desi</i>      | Ca_Desig_Chr03               | 18045434                       | (A/T)       |
| 26874       | CadSNP2469     | <i>Desi</i>      | Ca_Desig_Chr03               | 18046766                       | (A/G)       |
| 26875       | CadSNP2470     | <i>Desi</i>      | Ca_Desig_Chr03               | 18046910                       | (A/G)       |
| 26876       | CadSNP2471     | <i>Desi</i>      | Ca_Desig_Chr03               | 18057610                       | (T/A)       |
| 26877       | CadSNP2472     | <i>Desi</i>      | Ca_Desig_Chr03               | 18101880                       | (A/T)       |
| 26878       | CadSNP2473     | <i>Desi</i>      | Ca_Desig_Chr03               | 18101900                       | (T/C)       |
| 26879       | CadSNP2474     | <i>Desi</i>      | Ca_Desig_Chr03               | 18140360                       | (A/C)       |
| 26880       | CadSNP2475     | <i>Desi</i>      | Ca_Desig_Chr03               | 18140427                       | (G/A)       |
| 26881       | CadSNP2476     | <i>Desi</i>      | Ca_Desig_Chr03               | 18140618                       | (G/A)       |
| 26882       | CadSNP2477     | <i>Desi</i>      | Ca_Desig_Chr03               | 18150924                       | (C/T)       |
| 26883       | CadSNP2478     | <i>Desi</i>      | Ca_Desig_Chr03               | 18150894                       | (C/T)       |
| 26884       | CadSNP2479     | <i>Desi</i>      | Ca_Desig_Chr03               | 18171597                       | (C/T)       |
| 26885       | CadSNP2480     | <i>Desi</i>      | Ca_Desig_Chr03               | 18171672                       | (A/G)       |
| 26886       | CadSNP2481     | <i>Desi</i>      | Ca_Desig_Chr03               | 18172204                       | (T/C)       |
| 26887       | CadSNP2482     | <i>Desi</i>      | Ca_Desig_Chr03               | 18192715                       | (T/C)       |
| 26888       | CadSNP2483     | <i>Desi</i>      | Ca_Desig_Chr03               | 18193117                       | (T/A)       |
| 26889       | CadSNP2484     | <i>Desi</i>      | Ca_Desig_Chr03               | 18193119                       | (G/C)       |
| 26890       | CadSNP2485     | <i>Desi</i>      | Ca_Desig_Chr03               | 18195900                       | (A/C)       |
| 26891       | CadSNP2486     | <i>Desi</i>      | Ca_Desig_Chr03               | 18195888                       | (G/A)       |
| 26892       | CadSNP2487     | <i>Desi</i>      | Ca_Desig_Chr03               | 18207344                       | (T/C)       |
| 26893       | CadSNP2488     | <i>Desi</i>      | Ca_Desig_Chr03               | 18207347                       | (T/C)       |
| 26894       | CadSNP2489     | <i>Desi</i>      | Ca_Desig_Chr03               | 18207408                       | (C/T)       |
| 26895       | CadSNP2490     | <i>Desi</i>      | Ca_Desig_Chr03               | 18273088                       | (A/G)       |
| 26896       | CadSNP2491     | <i>Desi</i>      | Ca_Desig_Chr03               | 18273114                       | (T/C)       |
| 26897       | CadSNP2492     | <i>Desi</i>      | Ca_Desig_Chr03               | 18285050                       | (A/G)       |
| 26898       | CadSNP2493     | <i>Desi</i>      | Ca_Desig_Chr03               | 18285039                       | (G/A)       |
| 26899       | CadSNP2494     | <i>Desi</i>      | Ca_Desig_Chr03               | 18299725                       | (A/C)       |
| 26900       | CadSNP2495     | <i>Desi</i>      | Ca_Desig_Chr03               | 18302796                       | (A/G)       |
| 26901       | CadSNP2496     | <i>Desi</i>      | Ca_Desig_Chr03               | 18340225                       | (T/A)       |
| 26902       | CadSNP2497     | <i>Desi</i>      | Ca_Desig_Chr03               | 18370632                       | (T/A)       |
| 26903       | CadSNP2498     | <i>Desi</i>      | Ca_Desig_Chr03               | 18416125                       | (A/G)       |

| <b>S.N.</b> | <b>SNP IDs</b> | <b>Cultivars</b> | <b>Chromosomes/scaffolds</b> | <b>Physical positions (bp)</b> | <b>SNPs</b> |
|-------------|----------------|------------------|------------------------------|--------------------------------|-------------|
| 26904       | CadSNP2499     | <i>Desi</i>      | Ca_Desig_Chr03               | 18416269                       | (C/T)       |
| 26905       | CadSNP2500     | <i>Desi</i>      | Ca_Desig_Chr03               | 18437879                       | (C/A)       |
| 26906       | CadSNP2501     | <i>Desi</i>      | Ca_Desig_Chr03               | 18439972                       | (A/G)       |
| 26907       | CadSNP2502     | <i>Desi</i>      | Ca_Desig_Chr03               | 18440169                       | (A/G)       |
| 26908       | CadSNP2503     | <i>Desi</i>      | Ca_Desig_Chr03               | 18440231                       | (C/T)       |
| 26909       | CadSNP2504     | <i>Desi</i>      | Ca_Desig_Chr03               | 18440247                       | (A/C)       |
| 26910       | CadSNP2505     | <i>Desi</i>      | Ca_Desig_Chr03               | 18440955                       | (A/C)       |
| 26911       | CadSNP2506     | <i>Desi</i>      | Ca_Desig_Chr03               | 18444954                       | (G/A)       |
| 26912       | CadSNP2507     | <i>Desi</i>      | Ca_Desig_Chr03               | 18444987                       | (C/T)       |
| 26913       | CadSNP2508     | <i>Desi</i>      | Ca_Desig_Chr03               | 18445034                       | (G/A)       |
| 26914       | CadSNP2509     | <i>Desi</i>      | Ca_Desig_Chr03               | 18445098                       | (G/A)       |
| 26915       | CadSNP2510     | <i>Desi</i>      | Ca_Desig_Chr03               | 18445067                       | (G/A)       |
| 26916       | CadSNP2511     | <i>Desi</i>      | Ca_Desig_Chr03               | 18446744                       | (A/C)       |
| 26917       | CadSNP2512     | <i>Desi</i>      | Ca_Desig_Chr03               | 18448735                       | (G/T)       |
| 26918       | CadSNP2513     | <i>Desi</i>      | Ca_Desig_Chr03               | 18448878                       | (A/C)       |
| 26919       | CadSNP2514     | <i>Desi</i>      | Ca_Desig_Chr03               | 18461505                       | (T/C)       |
| 26920       | CadSNP2515     | <i>Desi</i>      | Ca_Desig_Chr03               | 18461526                       | (T/C)       |
| 26921       | CadSNP2516     | <i>Desi</i>      | Ca_Desig_Chr03               | 18461555                       | (T/C)       |
| 26922       | CadSNP2517     | <i>Desi</i>      | Ca_Desig_Chr03               | 18461745                       | (G/A)       |
| 26923       | CadSNP2518     | <i>Desi</i>      | Ca_Desig_Chr03               | 18461805                       | (A/G)       |
| 26924       | CadSNP2519     | <i>Desi</i>      | Ca_Desig_Chr03               | 18486133                       | (T/C)       |
| 26925       | CadSNP2520     | <i>Desi</i>      | Ca_Desig_Chr03               | 18486193                       | (T/G)       |
| 26926       | CadSNP2521     | <i>Desi</i>      | Ca_Desig_Chr03               | 18486244                       | (C/A)       |
| 26927       | CadSNP2522     | <i>Desi</i>      | Ca_Desig_Chr03               | 18500277                       | (C/G)       |
| 26928       | CadSNP2523     | <i>Desi</i>      | Ca_Desig_Chr03               | 18530390                       | (A/G)       |
| 26929       | CadSNP2524     | <i>Desi</i>      | Ca_Desig_Chr03               | 18530461                       | (A/G)       |
| 26930       | CadSNP2525     | <i>Desi</i>      | Ca_Desig_Chr03               | 18573749                       | (A/C)       |
| 26931       | CadSNP2526     | <i>Desi</i>      | Ca_Desig_Chr03               | 18652129                       | (T/C)       |
| 26932       | CadSNP2527     | <i>Desi</i>      | Ca_Desig_Chr03               | 18667652                       | (A/G)       |
| 26933       | CadSNP2528     | <i>Desi</i>      | Ca_Desig_Chr03               | 18667770                       | (T/A)       |
| 26934       | CadSNP2529     | <i>Desi</i>      | Ca_Desig_Chr03               | 18682250                       | (A/G)       |
| 26935       | CadSNP2530     | <i>Desi</i>      | Ca_Desig_Chr03               | 18702954                       | (C/T)       |
| 26936       | CadSNP2531     | <i>Desi</i>      | Ca_Desig_Chr03               | 18703009                       | (G/T)       |
| 26937       | CadSNP2532     | <i>Desi</i>      | Ca_Desig_Chr03               | 18703008                       | (C/A)       |
| 26938       | CadSNP2533     | <i>Desi</i>      | Ca_Desig_Chr03               | 18703005                       | (G/A)       |
| 26939       | CadSNP2534     | <i>Desi</i>      | Ca_Desig_Chr03               | 18715729                       | (G/C)       |
| 26940       | CadSNP2535     | <i>Desi</i>      | Ca_Desig_Chr03               | 18818986                       | (A/C)       |
| 26941       | CadSNP2536     | <i>Desi</i>      | Ca_Desig_Chr03               | 18818967                       | (T/C)       |

| <b>S.N.</b> | <b>SNP IDs</b> | <b>Cultivars</b> | <b>Chromosomes/scaffolds</b> | <b>Physical positions (bp)</b> | <b>SNPs</b> |
|-------------|----------------|------------------|------------------------------|--------------------------------|-------------|
| 26942       | CadSNP2537     | <i>Desi</i>      | Ca_Desig_Chr03               | 18968448                       | (T/C)       |
| 26943       | CadSNP2538     | <i>Desi</i>      | Ca_Desig_Chr03               | 18976059                       | (C/T)       |
| 26944       | CadSNP2539     | <i>Desi</i>      | Ca_Desig_Chr03               | 18976309                       | (C/A)       |
| 26945       | CadSNP2540     | <i>Desi</i>      | Ca_Desig_Chr03               | 18976346                       | (A/C)       |
| 26946       | CadSNP2541     | <i>Desi</i>      | Ca_Desig_Chr03               | 18989078                       | (G/C)       |
| 26947       | CadSNP2542     | <i>Desi</i>      | Ca_Desig_Chr03               | 18989029                       | (C/T)       |
| 26948       | CadSNP2543     | <i>Desi</i>      | Ca_Desig_Chr03               | 19054144                       | (G/C)       |
| 26949       | CadSNP2544     | <i>Desi</i>      | Ca_Desig_Chr03               | 19061973                       | (G/A)       |
| 26950       | CadSNP2545     | <i>Desi</i>      | Ca_Desig_Chr03               | 19083604                       | (G/A)       |
| 26951       | CadSNP2546     | <i>Desi</i>      | Ca_Desig_Chr03               | 19113194                       | (A/G)       |
| 26952       | CadSNP2547     | <i>Desi</i>      | Ca_Desig_Chr03               | 19113403                       | (T/C)       |
| 26953       | CadSNP2548     | <i>Desi</i>      | Ca_Desig_Chr03               | 19113488                       | (C/T)       |
| 26954       | CadSNP2549     | <i>Desi</i>      | Ca_Desig_Chr03               | 19114097                       | (G/C)       |
| 26955       | CadSNP2550     | <i>Desi</i>      | Ca_Desig_Chr03               | 19114100                       | (T/G)       |
| 26956       | CadSNP2551     | <i>Desi</i>      | Ca_Desig_Chr03               | 19114103                       | (T/C)       |
| 26957       | CadSNP2552     | <i>Desi</i>      | Ca_Desig_Chr03               | 19114106                       | (T/A)       |
| 26958       | CadSNP2553     | <i>Desi</i>      | Ca_Desig_Chr03               | 19114160                       | (A/G)       |
| 26959       | CadSNP2554     | <i>Desi</i>      | Ca_Desig_Chr03               | 19148843                       | (C/G)       |
| 26960       | CadSNP2555     | <i>Desi</i>      | Ca_Desig_Chr03               | 19166405                       | (G/T)       |
| 26961       | CadSNP2556     | <i>Desi</i>      | Ca_Desig_Chr03               | 19172991                       | (A/C)       |
| 26962       | CadSNP2557     | <i>Desi</i>      | Ca_Desig_Chr03               | 19201730                       | (T/A)       |
| 26963       | CadSNP2558     | <i>Desi</i>      | Ca_Desig_Chr03               | 19562105                       | (C/T)       |
| 26964       | CadSNP2559     | <i>Desi</i>      | Ca_Desig_Chr03               | 19562079                       | (C/T)       |
| 26965       | CadSNP2560     | <i>Desi</i>      | Ca_Desig_Chr03               | 19562232                       | (T/G)       |
| 26966       | CadSNP2561     | <i>Desi</i>      | Ca_Desig_Chr03               | 19562374                       | (A/G)       |
| 26967       | CadSNP2562     | <i>Desi</i>      | Ca_Desig_Chr03               | 19567077                       | (A/G)       |
| 26968       | CadSNP2563     | <i>Desi</i>      | Ca_Desig_Chr03               | 19567072                       | (C/T)       |
| 26969       | CadSNP2564     | <i>Desi</i>      | Ca_Desig_Chr03               | 19567059                       | (A/G)       |
| 26970       | CadSNP2565     | <i>Desi</i>      | Ca_Desig_Chr03               | 19593350                       | (C/T)       |
| 26971       | CadSNP2566     | <i>Desi</i>      | Ca_Desig_Chr03               | 19612103                       | (G/A)       |
| 26972       | CadSNP2567     | <i>Desi</i>      | Ca_Desig_Chr03               | 19617421                       | (T/C)       |
| 26973       | CadSNP2568     | <i>Desi</i>      | Ca_Desig_Chr03               | 19634559                       | (C/T)       |
| 26974       | CadSNP2569     | <i>Desi</i>      | Ca_Desig_Chr03               | 19634540                       | (G/A)       |
| 26975       | CadSNP2570     | <i>Desi</i>      | Ca_Desig_Chr03               | 19634515                       | (G/T)       |
| 26976       | CadSNP2571     | <i>Desi</i>      | Ca_Desig_Chr03               | 19634618                       | (C/G)       |
| 26977       | CadSNP2572     | <i>Desi</i>      | Ca_Desig_Chr03               | 19649177                       | (A/C)       |
| 26978       | CadSNP2573     | <i>Desi</i>      | Ca_Desig_Chr03               | 19660296                       | (T/G)       |
| 26979       | CadSNP2574     | <i>Desi</i>      | Ca_Desig_Chr03               | 19666249                       | (G/A)       |



| <b>S.N.</b> | <b>SNP IDs</b> | <b>Cultivars</b> | <b>Chromosomes/scaffolds</b> | <b>Physical positions (bp)</b> | <b>SNPs</b> |
|-------------|----------------|------------------|------------------------------|--------------------------------|-------------|
| 26980       | CadSNP2575     | <i>Desi</i>      | Ca_Desig_Chr03               | 19666243                       | (A/T)       |
| 26981       | CadSNP2576     | <i>Desi</i>      | Ca_Desig_Chr03               | 19666239                       | (T/A)       |
| 26982       | CadSNP2577     | <i>Desi</i>      | Ca_Desig_Chr03               | 19666229                       | (T/G)       |
| 26983       | CadSNP2578     | <i>Desi</i>      | Ca_Desig_Chr03               | 19672916                       | (C/T)       |
| 26984       | CadSNP2579     | <i>Desi</i>      | Ca_Desig_Chr03               | 19673774                       | (A/G)       |
| 26985       | CadSNP2580     | <i>Desi</i>      | Ca_Desig_Chr03               | 19674856                       | (T/G)       |
| 26986       | CadSNP2581     | <i>Desi</i>      | Ca_Desig_Chr03               | 19702745                       | (C/T)       |
| 26987       | CadSNP2582     | <i>Desi</i>      | Ca_Desig_Chr03               | 19702753                       | (T/G)       |
| 26988       | CadSNP2583     | <i>Desi</i>      | Ca_Desig_Chr03               | 19702779                       | (G/A)       |
| 26989       | CadSNP2584     | <i>Desi</i>      | Ca_Desig_Chr03               | 19707456                       | (T/C)       |
| 26990       | CadSNP2585     | <i>Desi</i>      | Ca_Desig_Chr03               | 19707424                       | (G/C)       |
| 26991       | CadSNP2586     | <i>Desi</i>      | Ca_Desig_Chr03               | 19707556                       | (C/T)       |
| 26992       | CadSNP2587     | <i>Desi</i>      | Ca_Desig_Chr03               | 19707735                       | (A/G)       |
| 26993       | CadSNP2588     | <i>Desi</i>      | Ca_Desig_Chr03               | 19707742                       | (G/A)       |
| 26994       | CadSNP2589     | <i>Desi</i>      | Ca_Desig_Chr03               | 19710005                       | (T/C)       |
| 26995       | CadSNP2590     | <i>Desi</i>      | Ca_Desig_Chr03               | 19710036                       | (T/C)       |
| 26996       | CadSNP2591     | <i>Desi</i>      | Ca_Desig_Chr03               | 19710066                       | (A/T)       |
| 26997       | CadSNP2592     | <i>Desi</i>      | Ca_Desig_Chr03               | 19715908                       | (A/G)       |
| 26998       | CadSNP2593     | <i>Desi</i>      | Ca_Desig_Chr03               | 19715915                       | (G/A)       |
| 26999       | CadSNP2594     | <i>Desi</i>      | Ca_Desig_Chr03               | 19779276                       | (A/T)       |
| 27000       | CadSNP2595     | <i>Desi</i>      | Ca_Desig_Chr03               | 19779288                       | (G/A)       |
| 27001       | CadSNP2596     | <i>Desi</i>      | Ca_Desig_Chr03               | 19779292                       | (C/G)       |
| 27002       | CadSNP2597     | <i>Desi</i>      | Ca_Desig_Chr03               | 19781105                       | (C/G)       |
| 27003       | CadSNP2598     | <i>Desi</i>      | Ca_Desig_Chr03               | 19781127                       | (T/C)       |
| 27004       | CadSNP2599     | <i>Desi</i>      | Ca_Desig_Chr03               | 19781156                       | (T/C)       |
| 27005       | CadSNP2600     | <i>Desi</i>      | Ca_Desig_Chr03               | 19821918                       | (T/G)       |
| 27006       | CadSNP2601     | <i>Desi</i>      | Ca_Desig_Chr03               | 19826899                       | (A/G)       |
| 27007       | CadSNP2602     | <i>Desi</i>      | Ca_Desig_Chr03               | 19827539                       | (T/G)       |
| 27008       | CadSNP2603     | <i>Desi</i>      | Ca_Desig_Chr03               | 19827573                       | (C/T)       |
| 27009       | CadSNP2604     | <i>Desi</i>      | Ca_Desig_Chr03               | 19844515                       | (C/G)       |
| 27010       | CadSNP2605     | <i>Desi</i>      | Ca_Desig_Chr03               | 19857684                       | (G/A)       |
| 27011       | CadSNP2606     | <i>Desi</i>      | Ca_Desig_Chr03               | 19868544                       | (A/C)       |
| 27012       | CadSNP2607     | <i>Desi</i>      | Ca_Desig_Chr03               | 19873907                       | (C/G)       |
| 27013       | CadSNP2608     | <i>Desi</i>      | Ca_Desig_Chr03               | 19877477                       | (T/G)       |
| 27014       | CadSNP2609     | <i>Desi</i>      | Ca_Desig_Chr03               | 19895631                       | (C/A)       |
| 27015       | CadSNP2610     | <i>Desi</i>      | Ca_Desig_Chr03               | 19897330                       | (G/A)       |
| 27016       | CadSNP2611     | <i>Desi</i>      | Ca_Desig_Chr03               | 19897394                       | (C/T)       |
| 27017       | CadSNP2612     | <i>Desi</i>      | Ca_Desig_Chr03               | 19898864                       | (T/C)       |

| <b>S.N.</b> | <b>SNP IDs</b> | <b>Cultivars</b> | <b>Chromosomes/scaffolds</b> | <b>Physical positions (bp)</b> | <b>SNPs</b> |
|-------------|----------------|------------------|------------------------------|--------------------------------|-------------|
| 27018       | CadSNP2613     | <i>Desi</i>      | Ca_Desig_Chr03               | 19899536                       | (C/T)       |
| 27019       | CadSNP2614     | <i>Desi</i>      | Ca_Desig_Chr03               | 19899597                       | (C/A)       |
| 27020       | CadSNP2615     | <i>Desi</i>      | Ca_Desig_Chr03               | 19899599                       | (A/G)       |
| 27021       | CadSNP2616     | <i>Desi</i>      | Ca_Desig_Chr03               | 19899620                       | (G/T)       |
| 27022       | CadSNP2617     | <i>Desi</i>      | Ca_Desig_Chr03               | 19899611                       | (G/T)       |
| 27023       | CadSNP2618     | <i>Desi</i>      | Ca_Desig_Chr03               | 19899673                       | (C/G)       |
| 27024       | CadSNP2619     | <i>Desi</i>      | Ca_Desig_Chr03               | 19899698                       | (G/T)       |
| 27025       | CadSNP2620     | <i>Desi</i>      | Ca_Desig_Chr03               | 19921122                       | (T/C)       |
| 27026       | CadSNP2621     | <i>Desi</i>      | Ca_Desig_Chr03               | 19925033                       | (T/C)       |
| 27027       | CadSNP2622     | <i>Desi</i>      | Ca_Desig_Chr03               | 19925933                       | (G/T)       |
| 27028       | CadSNP2623     | <i>Desi</i>      | Ca_Desig_Chr03               | 19925894                       | (C/T)       |
| 27029       | CadSNP2624     | <i>Desi</i>      | Ca_Desig_Chr03               | 19925928                       | (A/G)       |
| 27030       | CadSNP2625     | <i>Desi</i>      | Ca_Desig_Chr03               | 19925945                       | (G/T)       |
| 27031       | CadSNP2626     | <i>Desi</i>      | Ca_Desig_Chr03               | 19965806                       | (T/C)       |
| 27032       | CadSNP2627     | <i>Desi</i>      | Ca_Desig_Chr03               | 19965795                       | (T/G)       |
| 27033       | CadSNP2628     | <i>Desi</i>      | Ca_Desig_Chr03               | 20002679                       | (C/T)       |
| 27034       | CadSNP2629     | <i>Desi</i>      | Ca_Desig_Chr03               | 20002666                       | (G/T)       |
| 27035       | CadSNP2630     | <i>Desi</i>      | Ca_Desig_Chr03               | 20002673                       | (G/A)       |
| 27036       | CadSNP2631     | <i>Desi</i>      | Ca_Desig_Chr03               | 20023325                       | (T/C)       |
| 27037       | CadSNP2632     | <i>Desi</i>      | Ca_Desig_Chr03               | 20023632                       | (T/A)       |
| 27038       | CadSNP2633     | <i>Desi</i>      | Ca_Desig_Chr03               | 20023610                       | (T/C)       |
| 27039       | CadSNP2634     | <i>Desi</i>      | Ca_Desig_Chr03               | 20023606                       | (G/T)       |
| 27040       | CadSNP2635     | <i>Desi</i>      | Ca_Desig_Chr03               | 20023598                       | (A/G)       |
| 27041       | CadSNP2636     | <i>Desi</i>      | Ca_Desig_Chr03               | 20023597                       | (C/T)       |
| 27042       | CadSNP2637     | <i>Desi</i>      | Ca_Desig_Chr03               | 20023592                       | (A/G)       |
| 27043       | CadSNP2638     | <i>Desi</i>      | Ca_Desig_Chr03               | 20023586                       | (G/T)       |
| 27044       | CadSNP2639     | <i>Desi</i>      | Ca_Desig_Chr03               | 20023572                       | (T/C)       |
| 27045       | CadSNP2640     | <i>Desi</i>      | Ca_Desig_Chr03               | 20040675                       | (A/G)       |
| 27046       | CadSNP2641     | <i>Desi</i>      | Ca_Desig_Chr03               | 20040669                       | (C/T)       |
| 27047       | CadSNP2642     | <i>Desi</i>      | Ca_Desig_Chr03               | 20040729                       | (T/A)       |
| 27048       | CadSNP2643     | <i>Desi</i>      | Ca_Desig_Chr03               | 20085780                       | (T/C)       |
| 27049       | CadSNP2644     | <i>Desi</i>      | Ca_Desig_Chr03               | 20085993                       | (A/G)       |
| 27050       | CadSNP2645     | <i>Desi</i>      | Ca_Desig_Chr03               | 20085985                       | (T/G)       |
| 27051       | CadSNP2646     | <i>Desi</i>      | Ca_Desig_Chr03               | 20085973                       | (G/T)       |
| 27052       | CadSNP2647     | <i>Desi</i>      | Ca_Desig_Chr03               | 20103164                       | (G/A)       |
| 27053       | CadSNP2648     | <i>Desi</i>      | Ca_Desig_Chr03               | 20103283                       | (A/G)       |
| 27054       | CadSNP2649     | <i>Desi</i>      | Ca_Desig_Chr03               | 20120485                       | (C/T)       |
| 27055       | CadSNP2650     | <i>Desi</i>      | Ca_Desig_Chr03               | 20120524                       | (T/C)       |

| <b>S.N.</b> | <b>SNP IDs</b> | <b>Cultivars</b> | <b>Chromosomes/scaffolds</b> | <b>Physical positions (bp)</b> | <b>SNPs</b> |
|-------------|----------------|------------------|------------------------------|--------------------------------|-------------|
| 27056       | CadSNP2651     | <i>Desi</i>      | Ca_Desig_Chr03               | 20120527                       | (T/A)       |
| 27057       | CadSNP2652     | <i>Desi</i>      | Ca_Desig_Chr03               | 20120529                       | (C/G)       |
| 27058       | CadSNP2653     | <i>Desi</i>      | Ca_Desig_Chr03               | 20139253                       | (A/G)       |
| 27059       | CadSNP2654     | <i>Desi</i>      | Ca_Desig_Chr03               | 20159856                       | (C/T)       |
| 27060       | CadSNP2655     | <i>Desi</i>      | Ca_Desig_Chr03               | 20161445                       | (G/A)       |
| 27061       | CadSNP2656     | <i>Desi</i>      | Ca_Desig_Chr03               | 20161447                       | (A/G)       |
| 27062       | CadSNP2657     | <i>Desi</i>      | Ca_Desig_Chr03               | 20205815                       | (T/C)       |
| 27063       | CadSNP2658     | <i>Desi</i>      | Ca_Desig_Chr03               | 20241816                       | (T/C)       |
| 27064       | CadSNP2659     | <i>Desi</i>      | Ca_Desig_Chr03               | 20251494                       | (G/C)       |
| 27065       | CadSNP2660     | <i>Desi</i>      | Ca_Desig_Chr03               | 20263158                       | (C/T)       |
| 27066       | CadSNP2661     | <i>Desi</i>      | Ca_Desig_Chr03               | 20263132                       | (C/T)       |
| 27067       | CadSNP2662     | <i>Desi</i>      | Ca_Desig_Chr03               | 20263125                       | (T/C)       |
| 27068       | CadSNP2663     | <i>Desi</i>      | Ca_Desig_Chr03               | 20264396                       | (A/G)       |
| 27069       | CadSNP2664     | <i>Desi</i>      | Ca_Desig_Chr03               | 20267244                       | (T/G)       |
| 27070       | CadSNP2665     | <i>Desi</i>      | Ca_Desig_Chr03               | 20267317                       | (G/C)       |
| 27071       | CadSNP2666     | <i>Desi</i>      | Ca_Desig_Chr03               | 20276932                       | (A/C)       |
| 27072       | CadSNP2667     | <i>Desi</i>      | Ca_Desig_Chr03               | 20276944                       | (T/G)       |
| 27073       | CadSNP2668     | <i>Desi</i>      | Ca_Desig_Chr03               | 20277002                       | (G/A)       |
| 27074       | CadSNP2669     | <i>Desi</i>      | Ca_Desig_Chr03               | 20293230                       | (A/C)       |
| 27075       | CadSNP2670     | <i>Desi</i>      | Ca_Desig_Chr03               | 20303278                       | (C/T)       |
| 27076       | CadSNP2671     | <i>Desi</i>      | Ca_Desig_Chr03               | 20313862                       | (T/A)       |
| 27077       | CadSNP2672     | <i>Desi</i>      | Ca_Desig_Chr03               | 20313923                       | (A/G)       |
| 27078       | CadSNP2673     | <i>Desi</i>      | Ca_Desig_Chr03               | 20316744                       | (T/C)       |
| 27079       | CadSNP2674     | <i>Desi</i>      | Ca_Desig_Chr03               | 20316797                       | (C/A)       |
| 27080       | CadSNP2675     | <i>Desi</i>      | Ca_Desig_Chr03               | 20316902                       | (A/G)       |
| 27081       | CadSNP2676     | <i>Desi</i>      | Ca_Desig_Chr03               | 20319272                       | (C/T)       |
| 27082       | CadSNP2677     | <i>Desi</i>      | Ca_Desig_Chr03               | 20335521                       | (G/T)       |
| 27083       | CadSNP2678     | <i>Desi</i>      | Ca_Desig_Chr03               | 20372617                       | (G/A)       |
| 27084       | CadSNP2679     | <i>Desi</i>      | Ca_Desig_Chr03               | 20372609                       | (A/G)       |
| 27085       | CadSNP2680     | <i>Desi</i>      | Ca_Desig_Chr03               | 20372731                       | (C/G)       |
| 27086       | CadSNP2681     | <i>Desi</i>      | Ca_Desig_Chr03               | 20418933                       | (T/C)       |
| 27087       | CadSNP2682     | <i>Desi</i>      | Ca_Desig_Chr03               | 20439532                       | (A/T)       |
| 27088       | CadSNP2683     | <i>Desi</i>      | Ca_Desig_Chr03               | 20440511                       | (T/C)       |
| 27089       | CadSNP2684     | <i>Desi</i>      | Ca_Desig_Chr03               | 20603607                       | (C/T)       |
| 27090       | CadSNP2685     | <i>Desi</i>      | Ca_Desig_Chr03               | 20614613                       | (T/G)       |
| 27091       | CadSNP2686     | <i>Desi</i>      | Ca_Desig_Chr03               | 20614542                       | (A/G)       |
| 27092       | CadSNP2687     | <i>Desi</i>      | Ca_Desig_Chr03               | 21029404                       | (G/A)       |
| 27093       | CadSNP2688     | <i>Desi</i>      | Ca_Desig_Chr03               | 21054058                       | (G/A)       |

| <b>S.N.</b> | <b>SNP IDs</b> | <b>Cultivars</b> | <b>Chromosomes/scaffolds</b> | <b>Physical positions (bp)</b> | <b>SNPs</b> |
|-------------|----------------|------------------|------------------------------|--------------------------------|-------------|
| 27094       | CadSNP2689     | <i>Desi</i>      | Ca_Desig_Chr03               | 21058243                       | (A/C)       |
| 27095       | CadSNP2690     | <i>Desi</i>      | Ca_Desig_Chr03               | 21063851                       | (T/G)       |
| 27096       | CadSNP2691     | <i>Desi</i>      | Ca_Desig_Chr03               | 21063811                       | (T/A)       |
| 27097       | CadSNP2692     | <i>Desi</i>      | Ca_Desig_Chr03               | 21114837                       | (C/T)       |
| 27098       | CadSNP2693     | <i>Desi</i>      | Ca_Desig_Chr03               | 21114951                       | (T/C)       |
| 27099       | CadSNP2694     | <i>Desi</i>      | Ca_Desig_Chr03               | 21114912                       | (C/A)       |
| 27100       | CadSNP2695     | <i>Desi</i>      | Ca_Desig_Chr03               | 21115138                       | (A/G)       |
| 27101       | CadSNP2696     | <i>Desi</i>      | Ca_Desig_Chr03               | 21180741                       | (T/G)       |
| 27102       | CadSNP2697     | <i>Desi</i>      | Ca_Desig_Chr03               | 21180891                       | (A/G)       |
| 27103       | CadSNP2698     | <i>Desi</i>      | Ca_Desig_Chr03               | 21191983                       | (C/T)       |
| 27104       | CadSNP2699     | <i>Desi</i>      | Ca_Desig_Chr03               | 21193003                       | (A/C)       |
| 27105       | CadSNP2700     | <i>Desi</i>      | Ca_Desig_Chr03               | 21209721                       | (A/G)       |
| 27106       | CadSNP2701     | <i>Desi</i>      | Ca_Desig_Chr03               | 21211842                       | (C/T)       |
| 27107       | CadSNP2702     | <i>Desi</i>      | Ca_Desig_Chr03               | 21211856                       | (A/T)       |
| 27108       | CadSNP2703     | <i>Desi</i>      | Ca_Desig_Chr03               | 21278570                       | (T/A)       |
| 27109       | CadSNP2704     | <i>Desi</i>      | Ca_Desig_Chr03               | 21278620                       | (C/A)       |
| 27110       | CadSNP2705     | <i>Desi</i>      | Ca_Desig_Chr03               | 21291151                       | (T/C)       |
| 27111       | CadSNP2706     | <i>Desi</i>      | Ca_Desig_Chr03               | 21291180                       | (C/A)       |
| 27112       | CadSNP2707     | <i>Desi</i>      | Ca_Desig_Chr03               | 21291206                       | (A/G)       |
| 27113       | CadSNP2708     | <i>Desi</i>      | Ca_Desig_Chr03               | 21393593                       | (T/C)       |
| 27114       | CadSNP2709     | <i>Desi</i>      | Ca_Desig_Chr03               | 21419859                       | (A/G)       |
| 27115       | CadSNP2710     | <i>Desi</i>      | Ca_Desig_Chr03               | 21419848                       | (A/G)       |
| 27116       | CadSNP2711     | <i>Desi</i>      | Ca_Desig_Chr03               | 21419836                       | (C/T)       |
| 27117       | CadSNP2712     | <i>Desi</i>      | Ca_Desig_Chr03               | 21425246                       | (T/C)       |
| 27118       | CadSNP2713     | <i>Desi</i>      | Ca_Desig_Chr03               | 21437976                       | (A/G)       |
| 27119       | CadSNP2714     | <i>Desi</i>      | Ca_Desig_Chr03               | 21516245                       | (A/G)       |
| 27120       | CadSNP2715     | <i>Desi</i>      | Ca_Desig_Chr03               | 21588139                       | (G/A)       |
| 27121       | CadSNP2716     | <i>Desi</i>      | Ca_Desig_Chr03               | 21588162                       | (C/A)       |
| 27122       | CadSNP2717     | <i>Desi</i>      | Ca_Desig_Chr03               | 21588165                       | (A/T)       |
| 27123       | CadSNP2718     | <i>Desi</i>      | Ca_Desig_Chr03               | 21588301                       | (G/A)       |
| 27124       | CadSNP2719     | <i>Desi</i>      | Ca_Desig_Chr03               | 21588236                       | (T/G)       |
| 27125       | CadSNP2720     | <i>Desi</i>      | Ca_Desig_Chr03               | 21592448                       | (A/G)       |
| 27126       | CadSNP2721     | <i>Desi</i>      | Ca_Desig_Chr03               | 21593645                       | (T/C)       |
| 27127       | CadSNP2722     | <i>Desi</i>      | Ca_Desig_Chr03               | 21593630                       | (C/A)       |
| 27128       | CadSNP2723     | <i>Desi</i>      | Ca_Desig_Chr03               | 21593603                       | (C/T)       |
| 27129       | CadSNP2724     | <i>Desi</i>      | Ca_Desig_Chr03               | 21622499                       | (C/G)       |
| 27130       | CadSNP2725     | <i>Desi</i>      | Ca_Desig_Chr03               | 21624396                       | (T/A)       |
| 27131       | CadSNP2726     | <i>Desi</i>      | Ca_Desig_Chr03               | 21624397                       | (A/T)       |

| <b>S.N.</b> | <b>SNP IDs</b> | <b>Cultivars</b> | <b>Chromosomes/scaffolds</b> | <b>Physical positions (bp)</b> | <b>SNPs</b> |
|-------------|----------------|------------------|------------------------------|--------------------------------|-------------|
| 27132       | CadSNP2727     | <i>Desi</i>      | Ca_Desig_Chr03               | 21658230                       | (C/A)       |
| 27133       | CadSNP2728     | <i>Desi</i>      | Ca_Desig_Chr03               | 21658322                       | (A/G)       |
| 27134       | CadSNP2729     | <i>Desi</i>      | Ca_Desig_Chr03               | 21761580                       | (T/A)       |
| 27135       | CadSNP2730     | <i>Desi</i>      | Ca_Desig_Chr03               | 21762576                       | (A/G)       |
| 27136       | CadSNP2731     | <i>Desi</i>      | Ca_Desig_Chr03               | 21762720                       | (A/G)       |
| 27137       | CadSNP2732     | <i>Desi</i>      | Ca_Desig_Chr03               | 21762712                       | (C/G)       |
| 27138       | CadSNP2733     | <i>Desi</i>      | Ca_Desig_Chr03               | 21762671                       | (C/A)       |
| 27139       | CadSNP2734     | <i>Desi</i>      | Ca_Desig_Chr03               | 21774308                       | (C/T)       |
| 27140       | CadSNP2735     | <i>Desi</i>      | Ca_Desig_Chr03               | 21867155                       | (G/T)       |
| 27141       | CadSNP2736     | <i>Desi</i>      | Ca_Desig_Chr03               | 21871721                       | (T/C)       |
| 27142       | CadSNP2737     | <i>Desi</i>      | Ca_Desig_Chr03               | 21881134                       | (T/C)       |
| 27143       | CadSNP2738     | <i>Desi</i>      | Ca_Desig_Chr03               | 21886035                       | (C/T)       |
| 27144       | CadSNP2739     | <i>Desi</i>      | Ca_Desig_Chr03               | 21886036                       | (A/G)       |
| 27145       | CadSNP2740     | <i>Desi</i>      | Ca_Desig_Chr03               | 21886097                       | (A/G)       |
| 27146       | CadSNP2741     | <i>Desi</i>      | Ca_Desig_Chr03               | 21886113                       | (G/C)       |
| 27147       | CadSNP2742     | <i>Desi</i>      | Ca_Desig_Chr03               | 21886234                       | (T/C)       |
| 27148       | CadSNP2743     | <i>Desi</i>      | Ca_Desig_Chr03               | 21886644                       | (G/A)       |
| 27149       | CadSNP2744     | <i>Desi</i>      | Ca_Desig_Chr03               | 21886654                       | (A/C)       |
| 27150       | CadSNP2745     | <i>Desi</i>      | Ca_Desig_Chr03               | 21886681                       | (C/T)       |
| 27151       | CadSNP2746     | <i>Desi</i>      | Ca_Desig_Chr03               | 21920950                       | (A/G)       |
| 27152       | CadSNP2747     | <i>Desi</i>      | Ca_Desig_Chr03               | 21920971                       | (G/T)       |
| 27153       | CadSNP2748     | <i>Desi</i>      | Ca_Desig_Chr03               | 21974573                       | (T/G)       |
| 27154       | CadSNP2749     | <i>Desi</i>      | Ca_Desig_Chr03               | 22003711                       | (A/G)       |
| 27155       | CadSNP2750     | <i>Desi</i>      | Ca_Desig_Chr03               | 22004833                       | (T/C)       |
| 27156       | CadSNP2751     | <i>Desi</i>      | Ca_Desig_Chr03               | 22023174                       | (T/G)       |
| 27157       | CadSNP2752     | <i>Desi</i>      | Ca_Desig_Chr03               | 22571666                       | (T/C)       |
| 27158       | CadSNP2753     | <i>Desi</i>      | Ca_Desig_Chr03               | 22571728                       | (T/G)       |
| 27159       | CadSNP2754     | <i>Desi</i>      | Ca_Desig_Chr03               | 22581290                       | (A/G)       |
| 27160       | CadSNP2755     | <i>Desi</i>      | Ca_Desig_Chr03               | 22670433                       | (G/C)       |
| 27161       | CadSNP2756     | <i>Desi</i>      | Ca_Desig_Chr03               | 22670503                       | (C/T)       |
| 27162       | CadSNP2757     | <i>Desi</i>      | Ca_Desig_Chr03               | 22670535                       | (A/G)       |
| 27163       | CadSNP2758     | <i>Desi</i>      | Ca_Desig_Chr03               | 22670692                       | (A/G)       |
| 27164       | CadSNP2759     | <i>Desi</i>      | Ca_Desig_Chr03               | 22670710                       | (G/A)       |
| 27165       | CadSNP2760     | <i>Desi</i>      | Ca_Desig_Chr03               | 22685623                       | (C/A)       |
| 27166       | CadSNP2761     | <i>Desi</i>      | Ca_Desig_Chr03               | 22685641                       | (C/A)       |
| 27167       | CadSNP2762     | <i>Desi</i>      | Ca_Desig_Chr03               | 22685662                       | (T/G)       |
| 27168       | CadSNP2763     | <i>Desi</i>      | Ca_Desig_Chr03               | 22687823                       | (C/T)       |
| 27169       | CadSNP2764     | <i>Desi</i>      | Ca_Desig_Chr03               | 22693336                       | (A/T)       |

| <b>S.N.</b> | <b>SNP IDs</b> | <b>Cultivars</b> | <b>Chromosomes/scaffolds</b> | <b>Physical positions (bp)</b> | <b>SNPs</b> |
|-------------|----------------|------------------|------------------------------|--------------------------------|-------------|
| 27170       | CadSNP2765     | <i>Desi</i>      | Ca_Desig_Chr03               | 22693426                       | (G/T)       |
| 27171       | CadSNP2766     | <i>Desi</i>      | Ca_Desig_Chr03               | 22693424                       | (G/A)       |
| 27172       | CadSNP2767     | <i>Desi</i>      | Ca_Desig_Chr03               | 22693402                       | (A/G)       |
| 27173       | CadSNP2768     | <i>Desi</i>      | Ca_Desig_Chr03               | 22698803                       | (T/G)       |
| 27174       | CadSNP2769     | <i>Desi</i>      | Ca_Desig_Chr03               | 22737981                       | (G/A)       |
| 27175       | CadSNP2770     | <i>Desi</i>      | Ca_Desig_Chr03               | 22837612                       | (T/A)       |
| 27176       | CadSNP2771     | <i>Desi</i>      | Ca_Desig_Chr03               | 22837572                       | (T/C)       |
| 27177       | CadSNP2772     | <i>Desi</i>      | Ca_Desig_Chr03               | 22880880                       | (C/G)       |
| 27178       | CadSNP2773     | <i>Desi</i>      | Ca_Desig_Chr03               | 22903529                       | (C/T)       |
| 27179       | CadSNP2774     | <i>Desi</i>      | Ca_Desig_Chr03               | 22903538                       | (G/A)       |
| 27180       | CadSNP2775     | <i>Desi</i>      | Ca_Desig_Chr03               | 22903613                       | (G/A)       |
| 27181       | CadSNP2776     | <i>Desi</i>      | Ca_Desig_Chr03               | 22903598                       | (C/A)       |
| 27182       | CadSNP2777     | <i>Desi</i>      | Ca_Desig_Chr03               | 22903664                       | (G/A)       |
| 27183       | CadSNP2778     | <i>Desi</i>      | Ca_Desig_Chr03               | 22973073                       | (T/C)       |
| 27184       | CadSNP2779     | <i>Desi</i>      | Ca_Desig_Chr03               | 22980522                       | (G/A)       |
| 27185       | CadSNP2780     | <i>Desi</i>      | Ca_Desig_Chr03               | 22980534                       | (C/G)       |
| 27186       | CadSNP2781     | <i>Desi</i>      | Ca_Desig_Chr03               | 22980578                       | (A/G)       |
| 27187       | CadSNP2782     | <i>Desi</i>      | Ca_Desig_Chr03               | 22984947                       | (G/C)       |
| 27188       | CadSNP2783     | <i>Desi</i>      | Ca_Desig_Chr03               | 22985057                       | (C/T)       |
| 27189       | CadSNP2784     | <i>Desi</i>      | Ca_Desig_Chr03               | 22992410                       | (G/A)       |
| 27190       | CadSNP2785     | <i>Desi</i>      | Ca_Desig_Chr03               | 22992503                       | (G/A)       |
| 27191       | CadSNP2786     | <i>Desi</i>      | Ca_Desig_Chr03               | 22992745                       | (G/A)       |
| 27192       | CadSNP2787     | <i>Desi</i>      | Ca_Desig_Chr03               | 22992748                       | (C/T)       |
| 27193       | CadSNP2788     | <i>Desi</i>      | Ca_Desig_Chr03               | 22992776                       | (A/G)       |
| 27194       | CadSNP2789     | <i>Desi</i>      | Ca_Desig_Chr03               | 23024245                       | (G/A)       |
| 27195       | CadSNP2790     | <i>Desi</i>      | Ca_Desig_Chr03               | 23024242                       | (T/G)       |
| 27196       | CadSNP2791     | <i>Desi</i>      | Ca_Desig_Chr03               | 23025239                       | (A/C)       |
| 27197       | CadSNP2792     | <i>Desi</i>      | Ca_Desig_Chr03               | 23052262                       | (A/G)       |
| 27198       | CadSNP2793     | <i>Desi</i>      | Ca_Desig_Chr03               | 23056374                       | (G/A)       |
| 27199       | CadSNP2794     | <i>Desi</i>      | Ca_Desig_Chr03               | 23108909                       | (G/A)       |
| 27200       | CadSNP2795     | <i>Desi</i>      | Ca_Desig_Chr03               | 23108971                       | (A/G)       |
| 27201       | CadSNP2796     | <i>Desi</i>      | Ca_Desig_Chr03               | 23111353                       | (C/T)       |
| 27202       | CadSNP2797     | <i>Desi</i>      | Ca_Desig_Chr03               | 23111354                       | (C/T)       |
| 27203       | CadSNP2798     | <i>Desi</i>      | Ca_Desig_Chr03               | 23111457                       | (A/G)       |
| 27204       | CadSNP2799     | <i>Desi</i>      | Ca_Desig_Chr03               | 23111450                       | (G/A)       |
| 27205       | CadSNP2800     | <i>Desi</i>      | Ca_Desig_Chr03               | 23119386                       | (C/T)       |
| 27206       | CadSNP2801     | <i>Desi</i>      | Ca_Desig_Chr03               | 23119464                       | (G/A)       |
| 27207       | CadSNP2802     | <i>Desi</i>      | Ca_Desig_Chr03               | 23144183                       | (A/G)       |

| <b>S.N.</b> | <b>SNP IDs</b> | <b>Cultivars</b> | <b>Chromosomes/scaffolds</b> | <b>Physical positions (bp)</b> | <b>SNPs</b> |
|-------------|----------------|------------------|------------------------------|--------------------------------|-------------|
| 27208       | CadSNP2803     | <i>Desi</i>      | Ca_Desig_Chr03               | 23144185                       | (G/T)       |
| 27209       | CadSNP2804     | <i>Desi</i>      | Ca_Desig_Chr03               | 23144197                       | (T/C)       |
| 27210       | CadSNP2805     | <i>Desi</i>      | Ca_Desig_Chr03               | 23144247                       | (A/C)       |
| 27211       | CadSNP2806     | <i>Desi</i>      | Ca_Desig_Chr03               | 23157641                       | (C/A)       |
| 27212       | CadSNP2807     | <i>Desi</i>      | Ca_Desig_Chr03               | 23157661                       | (A/G)       |
| 27213       | CadSNP2808     | <i>Desi</i>      | Ca_Desig_Chr03               | 23164333                       | (A/G)       |
| 27214       | CadSNP2809     | <i>Desi</i>      | Ca_Desig_Chr03               | 23164356                       | (T/C)       |
| 27215       | CadSNP2810     | <i>Desi</i>      | Ca_Desig_Chr03               | 23164362                       | (G/C)       |
| 27216       | CadSNP2811     | <i>Desi</i>      | Ca_Desig_Chr03               | 23164363                       | (T/C)       |
| 27217       | CadSNP2812     | <i>Desi</i>      | Ca_Desig_Chr03               | 23164365                       | (A/T)       |
| 27218       | CadSNP2813     | <i>Desi</i>      | Ca_Desig_Chr03               | 23164372                       | (A/C)       |
| 27219       | CadSNP2814     | <i>Desi</i>      | Ca_Desig_Chr03               | 23164373                       | (G/T)       |
| 27220       | CadSNP2815     | <i>Desi</i>      | Ca_Desig_Chr03               | 23164374                       | (G/T)       |
| 27221       | CadSNP2816     | <i>Desi</i>      | Ca_Desig_Chr03               | 23164375                       | (T/G)       |
| 27222       | CadSNP2817     | <i>Desi</i>      | Ca_Desig_Chr03               | 23164380                       | (G/A)       |
| 27223       | CadSNP2818     | <i>Desi</i>      | Ca_Desig_Chr03               | 23164474                       | (A/G)       |
| 27224       | CadSNP2819     | <i>Desi</i>      | Ca_Desig_Chr03               | 23164499                       | (T/C)       |
| 27225       | CadSNP2820     | <i>Desi</i>      | Ca_Desig_Chr03               | 23167177                       | (A/C)       |
| 27226       | CadSNP2821     | <i>Desi</i>      | Ca_Desig_Chr03               | 23325891                       | (C/A)       |
| 27227       | CadSNP2822     | <i>Desi</i>      | Ca_Desig_Chr03               | 23330342                       | (G/A)       |
| 27228       | CadSNP2823     | <i>Desi</i>      | Ca_Desig_Chr04               | 35399                          | (C/T)       |
| 27229       | CadSNP2824     | <i>Desi</i>      | Ca_Desig_Chr04               | 35603                          | (T/C)       |
| 27230       | CadSNP2825     | <i>Desi</i>      | Ca_Desig_Chr04               | 35602                          | (C/A)       |
| 27231       | CadSNP2826     | <i>Desi</i>      | Ca_Desig_Chr04               | 35675                          | (A/G)       |
| 27232       | CadSNP2827     | <i>Desi</i>      | Ca_Desig_Chr04               | 35763                          | (G/T)       |
| 27233       | CadSNP2828     | <i>Desi</i>      | Ca_Desig_Chr04               | 122917                         | (C/T)       |
| 27234       | CadSNP2829     | <i>Desi</i>      | Ca_Desig_Chr04               | 123046                         | (A/G)       |
| 27235       | CadSNP2830     | <i>Desi</i>      | Ca_Desig_Chr04               | 145927                         | (G/A)       |
| 27236       | CadSNP2831     | <i>Desi</i>      | Ca_Desig_Chr04               | 151462                         | (G/C)       |
| 27237       | CadSNP2832     | <i>Desi</i>      | Ca_Desig_Chr04               | 156944                         | (C/T)       |
| 27238       | CadSNP2833     | <i>Desi</i>      | Ca_Desig_Chr04               | 198665                         | (C/T)       |
| 27239       | CadSNP2834     | <i>Desi</i>      | Ca_Desig_Chr04               | 198670                         | (C/T)       |
| 27240       | CadSNP2835     | <i>Desi</i>      | Ca_Desig_Chr04               | 198796                         | (T/C)       |
| 27241       | CadSNP2836     | <i>Desi</i>      | Ca_Desig_Chr04               | 208481                         | (C/A)       |
| 27242       | CadSNP2837     | <i>Desi</i>      | Ca_Desig_Chr04               | 223008                         | (A/G)       |
| 27243       | CadSNP2838     | <i>Desi</i>      | Ca_Desig_Chr04               | 223012                         | (G/T)       |
| 27244       | CadSNP2839     | <i>Desi</i>      | Ca_Desig_Chr04               | 223059                         | (A/C)       |
| 27245       | CadSNP2840     | <i>Desi</i>      | Ca_Desig_Chr04               | 223101                         | (C/G)       |

| <b>S.N.</b> | <b>SNP IDs</b> | <b>Cultivars</b> | <b>Chromosomes/scaffolds</b> | <b>Physical positions (bp)</b> | <b>SNPs</b> |
|-------------|----------------|------------------|------------------------------|--------------------------------|-------------|
| 27246       | CadSNP2841     | <i>Desi</i>      | Ca_Desig_Chr04               | 232316                         | (A/T)       |
| 27247       | CadSNP2842     | <i>Desi</i>      | Ca_Desig_Chr04               | 232426                         | (G/T)       |
| 27248       | CadSNP2843     | <i>Desi</i>      | Ca_Desig_Chr04               | 241125                         | (G/A)       |
| 27249       | CadSNP2844     | <i>Desi</i>      | Ca_Desig_Chr04               | 242163                         | (C/A)       |
| 27250       | CadSNP2845     | <i>Desi</i>      | Ca_Desig_Chr04               | 242343                         | (G/A)       |
| 27251       | CadSNP2846     | <i>Desi</i>      | Ca_Desig_Chr04               | 256346                         | (G/C)       |
| 27252       | CadSNP2847     | <i>Desi</i>      | Ca_Desig_Chr04               | 334848                         | (T/C)       |
| 27253       | CadSNP2848     | <i>Desi</i>      | Ca_Desig_Chr04               | 334789                         | (G/C)       |
| 27254       | CadSNP2849     | <i>Desi</i>      | Ca_Desig_Chr04               | 340829                         | (A/G)       |
| 27255       | CadSNP2850     | <i>Desi</i>      | Ca_Desig_Chr04               | 345799                         | (T/C)       |
| 27256       | CadSNP2851     | <i>Desi</i>      | Ca_Desig_Chr04               | 345813                         | (G/A)       |
| 27257       | CadSNP2852     | <i>Desi</i>      | Ca_Desig_Chr04               | 348344                         | (A/G)       |
| 27258       | CadSNP2853     | <i>Desi</i>      | Ca_Desig_Chr04               | 348384                         | (T/C)       |
| 27259       | CadSNP2854     | <i>Desi</i>      | Ca_Desig_Chr04               | 348629                         | (G/A)       |
| 27260       | CadSNP2855     | <i>Desi</i>      | Ca_Desig_Chr04               | 348850                         | (C/T)       |
| 27261       | CadSNP2856     | <i>Desi</i>      | Ca_Desig_Chr04               | 354150                         | (A/T)       |
| 27262       | CadSNP2857     | <i>Desi</i>      | Ca_Desig_Chr04               | 367835                         | (A/C)       |
| 27263       | CadSNP2858     | <i>Desi</i>      | Ca_Desig_Chr04               | 367829                         | (A/C)       |
| 27264       | CadSNP2859     | <i>Desi</i>      | Ca_Desig_Chr04               | 367860                         | (A/G)       |
| 27265       | CadSNP2860     | <i>Desi</i>      | Ca_Desig_Chr04               | 367869                         | (G/A)       |
| 27266       | CadSNP2861     | <i>Desi</i>      | Ca_Desig_Chr04               | 367943                         | (G/A)       |
| 27267       | CadSNP2862     | <i>Desi</i>      | Ca_Desig_Chr04               | 368237                         | (C/T)       |
| 27268       | CadSNP2863     | <i>Desi</i>      | Ca_Desig_Chr04               | 368285                         | (G/C)       |
| 27269       | CadSNP2864     | <i>Desi</i>      | Ca_Desig_Chr04               | 368270                         | (A/G)       |
| 27270       | CadSNP2865     | <i>Desi</i>      | Ca_Desig_Chr04               | 368472                         | (C/T)       |
| 27271       | CadSNP2866     | <i>Desi</i>      | Ca_Desig_Chr04               | 368438                         | (T/G)       |
| 27272       | CadSNP2867     | <i>Desi</i>      | Ca_Desig_Chr04               | 368435                         | (T/A)       |
| 27273       | CadSNP2868     | <i>Desi</i>      | Ca_Desig_Chr04               | 368416                         | (T/C)       |
| 27274       | CadSNP2869     | <i>Desi</i>      | Ca_Desig_Chr04               | 371659                         | (G/T)       |
| 27275       | CadSNP2870     | <i>Desi</i>      | Ca_Desig_Chr04               | 371710                         | (C/A)       |
| 27276       | CadSNP2871     | <i>Desi</i>      | Ca_Desig_Chr04               | 371754                         | (A/T)       |
| 27277       | CadSNP2872     | <i>Desi</i>      | Ca_Desig_Chr04               | 372646                         | (G/T)       |
| 27278       | CadSNP2873     | <i>Desi</i>      | Ca_Desig_Chr04               | 372810                         | (G/C)       |
| 27279       | CadSNP2874     | <i>Desi</i>      | Ca_Desig_Chr04               | 372806                         | (T/C)       |
| 27280       | CadSNP2875     | <i>Desi</i>      | Ca_Desig_Chr04               | 372779                         | (G/A)       |
| 27281       | CadSNP2876     | <i>Desi</i>      | Ca_Desig_Chr04               | 404560                         | (T/G)       |
| 27282       | CadSNP2877     | <i>Desi</i>      | Ca_Desig_Chr04               | 404617                         | (T/C)       |
| 27283       | CadSNP2878     | <i>Desi</i>      | Ca_Desig_Chr04               | 404656                         | (T/C)       |



| <b>S.N.</b> | <b>SNP IDs</b> | <b>Cultivars</b> | <b>Chromosomes/scaffolds</b> | <b>Physical positions (bp)</b> | <b>SNPs</b> |
|-------------|----------------|------------------|------------------------------|--------------------------------|-------------|
| 27284       | CadSNP2879     | <i>Desi</i>      | Ca_Desig_Chr04               | 404703                         | (G/T)       |
| 27285       | CadSNP2880     | <i>Desi</i>      | Ca_Desig_Chr04               | 677321                         | (A/G)       |
| 27286       | CadSNP2881     | <i>Desi</i>      | Ca_Desig_Chr04               | 682478                         | (T/C)       |
| 27287       | CadSNP2882     | <i>Desi</i>      | Ca_Desig_Chr04               | 682574                         | (G/A)       |
| 27288       | CadSNP2883     | <i>Desi</i>      | Ca_Desig_Chr04               | 682894                         | (C/G)       |
| 27289       | CadSNP2884     | <i>Desi</i>      | Ca_Desig_Chr04               | 708922                         | (C/T)       |
| 27290       | CadSNP2885     | <i>Desi</i>      | Ca_Desig_Chr04               | 719446                         | (G/A)       |
| 27291       | CadSNP2886     | <i>Desi</i>      | Ca_Desig_Chr04               | 719505                         | (G/A)       |
| 27292       | CadSNP2887     | <i>Desi</i>      | Ca_Desig_Chr04               | 719593                         | (G/A)       |
| 27293       | CadSNP2888     | <i>Desi</i>      | Ca_Desig_Chr04               | 719545                         | (A/C)       |
| 27294       | CadSNP2889     | <i>Desi</i>      | Ca_Desig_Chr04               | 725822                         | (G/A)       |
| 27295       | CadSNP2890     | <i>Desi</i>      | Ca_Desig_Chr04               | 725870                         | (C/T)       |
| 27296       | CadSNP2891     | <i>Desi</i>      | Ca_Desig_Chr04               | 748245                         | (A/G)       |
| 27297       | CadSNP2892     | <i>Desi</i>      | Ca_Desig_Chr04               | 748557                         | (A/T)       |
| 27298       | CadSNP2893     | <i>Desi</i>      | Ca_Desig_Chr04               | 748659                         | (G/A)       |
| 27299       | CadSNP2894     | <i>Desi</i>      | Ca_Desig_Chr04               | 771325                         | (C/T)       |
| 27300       | CadSNP2895     | <i>Desi</i>      | Ca_Desig_Chr04               | 856351                         | (C/T)       |
| 27301       | CadSNP2896     | <i>Desi</i>      | Ca_Desig_Chr04               | 856412                         | (C/T)       |
| 27302       | CadSNP2897     | <i>Desi</i>      | Ca_Desig_Chr04               | 889515                         | (C/G)       |
| 27303       | CadSNP2898     | <i>Desi</i>      | Ca_Desig_Chr04               | 889499                         | (C/T)       |
| 27304       | CadSNP2899     | <i>Desi</i>      | Ca_Desig_Chr04               | 1022009                        | (A/G)       |
| 27305       | CadSNP2900     | <i>Desi</i>      | Ca_Desig_Chr04               | 1050852                        | (T/C)       |
| 27306       | CadSNP2901     | <i>Desi</i>      | Ca_Desig_Chr04               | 1104716                        | (C/T)       |
| 27307       | CadSNP2902     | <i>Desi</i>      | Ca_Desig_Chr04               | 1104683                        | (A/C)       |
| 27308       | CadSNP2903     | <i>Desi</i>      | Ca_Desig_Chr04               | 1105304                        | (T/C)       |
| 27309       | CadSNP2904     | <i>Desi</i>      | Ca_Desig_Chr04               | 1105335                        | (A/G)       |
| 27310       | CadSNP2905     | <i>Desi</i>      | Ca_Desig_Chr04               | 1150567                        | (A/G)       |
| 27311       | CadSNP2906     | <i>Desi</i>      | Ca_Desig_Chr04               | 1153521                        | (A/G)       |
| 27312       | CadSNP2907     | <i>Desi</i>      | Ca_Desig_Chr04               | 1183727                        | (T/G)       |
| 27313       | CadSNP2908     | <i>Desi</i>      | Ca_Desig_Chr04               | 1183987                        | (G/A)       |
| 27314       | CadSNP2909     | <i>Desi</i>      | Ca_Desig_Chr04               | 1183972                        | (G/A)       |
| 27315       | CadSNP2910     | <i>Desi</i>      | Ca_Desig_Chr04               | 1224856                        | (C/T)       |
| 27316       | CadSNP2911     | <i>Desi</i>      | Ca_Desig_Chr04               | 1225164                        | (G/A)       |
| 27317       | CadSNP2912     | <i>Desi</i>      | Ca_Desig_Chr04               | 1225211                        | (G/A)       |
| 27318       | CadSNP2913     | <i>Desi</i>      | Ca_Desig_Chr04               | 1225209                        | (A/G)       |
| 27319       | CadSNP2914     | <i>Desi</i>      | Ca_Desig_Chr04               | 1226846                        | (C/G)       |
| 27320       | CadSNP2915     | <i>Desi</i>      | Ca_Desig_Chr04               | 1227014                        | (A/G)       |
| 27321       | CadSNP2916     | <i>Desi</i>      | Ca_Desig_Chr04               | 1228391                        | (G/A)       |

| <b>S.N.</b> | <b>SNP IDs</b> | <b>Cultivars</b> | <b>Chromosomes/scaffolds</b> | <b>Physical positions (bp)</b> | <b>SNPs</b> |
|-------------|----------------|------------------|------------------------------|--------------------------------|-------------|
| 27322       | CadSNP2917     | <i>Desi</i>      | Ca_Desig_Chr04               | 1248441                        | (T/G)       |
| 27323       | CadSNP2918     | <i>Desi</i>      | Ca_Desig_Chr04               | 1248476                        | (A/G)       |
| 27324       | CadSNP2919     | <i>Desi</i>      | Ca_Desig_Chr04               | 1248565                        | (A/T)       |
| 27325       | CadSNP2920     | <i>Desi</i>      | Ca_Desig_Chr04               | 1323302                        | (A/C)       |
| 27326       | CadSNP2921     | <i>Desi</i>      | Ca_Desig_Chr04               | 1324126                        | (G/A)       |
| 27327       | CadSNP2922     | <i>Desi</i>      | Ca_Desig_Chr04               | 1324195                        | (C/T)       |
| 27328       | CadSNP2923     | <i>Desi</i>      | Ca_Desig_Chr04               | 1324173                        | (C/T)       |
| 27329       | CadSNP2924     | <i>Desi</i>      | Ca_Desig_Chr04               | 1770479                        | (A/C)       |
| 27330       | CadSNP2925     | <i>Desi</i>      | Ca_Desig_Chr04               | 1770493                        | (T/G)       |
| 27331       | CadSNP2926     | <i>Desi</i>      | Ca_Desig_Chr04               | 1829731                        | (T/C)       |
| 27332       | CadSNP2927     | <i>Desi</i>      | Ca_Desig_Chr04               | 1988478                        | (T/C)       |
| 27333       | CadSNP2928     | <i>Desi</i>      | Ca_Desig_Chr04               | 2040839                        | (A/G)       |
| 27334       | CadSNP2929     | <i>Desi</i>      | Ca_Desig_Chr04               | 2042524                        | (T/A)       |
| 27335       | CadSNP2930     | <i>Desi</i>      | Ca_Desig_Chr04               | 2042496                        | (T/C)       |
| 27336       | CadSNP2931     | <i>Desi</i>      | Ca_Desig_Chr04               | 2051133                        | (T/A)       |
| 27337       | CadSNP2932     | <i>Desi</i>      | Ca_Desig_Chr04               | 2057260                        | (G/C)       |
| 27338       | CadSNP2933     | <i>Desi</i>      | Ca_Desig_Chr04               | 2174628                        | (C/T)       |
| 27339       | CadSNP2934     | <i>Desi</i>      | Ca_Desig_Chr04               | 2175016                        | (A/G)       |
| 27340       | CadSNP2935     | <i>Desi</i>      | Ca_Desig_Chr04               | 2391129                        | (C/A)       |
| 27341       | CadSNP2936     | <i>Desi</i>      | Ca_Desig_Chr04               | 2391146                        | (T/C)       |
| 27342       | CadSNP2937     | <i>Desi</i>      | Ca_Desig_Chr04               | 2391174                        | (A/G)       |
| 27343       | CadSNP2938     | <i>Desi</i>      | Ca_Desig_Chr04               | 2391186                        | (A/T)       |
| 27344       | CadSNP2939     | <i>Desi</i>      | Ca_Desig_Chr04               | 2391194                        | (A/T)       |
| 27345       | CadSNP2940     | <i>Desi</i>      | Ca_Desig_Chr04               | 2391342                        | (C/G)       |
| 27346       | CadSNP2941     | <i>Desi</i>      | Ca_Desig_Chr04               | 2391280                        | (C/T)       |
| 27347       | CadSNP2942     | <i>Desi</i>      | Ca_Desig_Chr04               | 2391276                        | (A/G)       |
| 27348       | CadSNP2943     | <i>Desi</i>      | Ca_Desig_Chr04               | 2396211                        | (A/G)       |
| 27349       | CadSNP2944     | <i>Desi</i>      | Ca_Desig_Chr04               | 2396485                        | (G/A)       |
| 27350       | CadSNP2945     | <i>Desi</i>      | Ca_Desig_Chr04               | 2397043                        | (C/A)       |
| 27351       | CadSNP2946     | <i>Desi</i>      | Ca_Desig_Chr04               | 2410917                        | (C/G)       |
| 27352       | CadSNP2947     | <i>Desi</i>      | Ca_Desig_Chr04               | 2410923                        | (C/A)       |
| 27353       | CadSNP2948     | <i>Desi</i>      | Ca_Desig_Chr04               | 2451203                        | (G/C)       |
| 27354       | CadSNP2949     | <i>Desi</i>      | Ca_Desig_Chr04               | 2451209                        | (A/G)       |
| 27355       | CadSNP2950     | <i>Desi</i>      | Ca_Desig_Chr04               | 2451219                        | (C/G)       |
| 27356       | CadSNP2951     | <i>Desi</i>      | Ca_Desig_Chr04               | 2451258                        | (A/G)       |
| 27357       | CadSNP2952     | <i>Desi</i>      | Ca_Desig_Chr04               | 2474344                        | (A/G)       |
| 27358       | CadSNP2953     | <i>Desi</i>      | Ca_Desig_Chr04               | 2474361                        | (A/T)       |
| 27359       | CadSNP2954     | <i>Desi</i>      | Ca_Desig_Chr04               | 2474371                        | (G/T)       |

| <b>S.N.</b> | <b>SNP IDs</b> | <b>Cultivars</b> | <b>Chromosomes/scaffolds</b> | <b>Physical positions (bp)</b> | <b>SNPs</b> |
|-------------|----------------|------------------|------------------------------|--------------------------------|-------------|
| 27360       | CadSNP2955     | <i>Desi</i>      | Ca_Desig_Chr04               | 2474428                        | (A/G)       |
| 27361       | CadSNP2956     | <i>Desi</i>      | Ca_Desig_Chr04               | 2474439                        | (G/A)       |
| 27362       | CadSNP2957     | <i>Desi</i>      | Ca_Desig_Chr04               | 2474445                        | (T/C)       |
| 27363       | CadSNP2958     | <i>Desi</i>      | Ca_Desig_Chr04               | 2474458                        | (T/C)       |
| 27364       | CadSNP2959     | <i>Desi</i>      | Ca_Desig_Chr04               | 2474472                        | (G/T)       |
| 27365       | CadSNP2960     | <i>Desi</i>      | Ca_Desig_Chr04               | 2511853                        | (C/T)       |
| 27366       | CadSNP2961     | <i>Desi</i>      | Ca_Desig_Chr04               | 2511841                        | (G/T)       |
| 27367       | CadSNP2962     | <i>Desi</i>      | Ca_Desig_Chr04               | 2511815                        | (T/C)       |
| 27368       | CadSNP2963     | <i>Desi</i>      | Ca_Desig_Chr04               | 2548463                        | (G/A)       |
| 27369       | CadSNP2964     | <i>Desi</i>      | Ca_Desig_Chr04               | 2620978                        | (G/A)       |
| 27370       | CadSNP2965     | <i>Desi</i>      | Ca_Desig_Chr04               | 2620974                        | (A/G)       |
| 27371       | CadSNP2966     | <i>Desi</i>      | Ca_Desig_Chr04               | 2620933                        | (T/A)       |
| 27372       | CadSNP2967     | <i>Desi</i>      | Ca_Desig_Chr04               | 2750818                        | (T/C)       |
| 27373       | CadSNP2968     | <i>Desi</i>      | Ca_Desig_Chr04               | 2750844                        | (G/A)       |
| 27374       | CadSNP2969     | <i>Desi</i>      | Ca_Desig_Chr04               | 2750863                        | (A/C)       |
| 27375       | CadSNP2970     | <i>Desi</i>      | Ca_Desig_Chr04               | 2751571                        | (G/T)       |
| 27376       | CadSNP2971     | <i>Desi</i>      | Ca_Desig_Chr04               | 2761588                        | (C/T)       |
| 27377       | CadSNP2972     | <i>Desi</i>      | Ca_Desig_Chr04               | 2761592                        | (G/A)       |
| 27378       | CadSNP2973     | <i>Desi</i>      | Ca_Desig_Chr04               | 2761601                        | (A/G)       |
| 27379       | CadSNP2974     | <i>Desi</i>      | Ca_Desig_Chr04               | 2761640                        | (A/G)       |
| 27380       | CadSNP2975     | <i>Desi</i>      | Ca_Desig_Chr04               | 2761644                        | (A/C)       |
| 27381       | CadSNP2976     | <i>Desi</i>      | Ca_Desig_Chr04               | 2761654                        | (G/C)       |
| 27382       | CadSNP2977     | <i>Desi</i>      | Ca_Desig_Chr04               | 2873185                        | (C/T)       |
| 27383       | CadSNP2978     | <i>Desi</i>      | Ca_Desig_Chr04               | 2873186                        | (G/A)       |
| 27384       | CadSNP2979     | <i>Desi</i>      | Ca_Desig_Chr04               | 2882647                        | (G/A)       |
| 27385       | CadSNP2980     | <i>Desi</i>      | Ca_Desig_Chr04               | 2906750                        | (T/G)       |
| 27386       | CadSNP2981     | <i>Desi</i>      | Ca_Desig_Chr04               | 2977378                        | (C/T)       |
| 27387       | CadSNP2982     | <i>Desi</i>      | Ca_Desig_Chr04               | 2977367                        | (G/A)       |
| 27388       | CadSNP2983     | <i>Desi</i>      | Ca_Desig_Chr04               | 2999779                        | (T/C)       |
| 27389       | CadSNP2984     | <i>Desi</i>      | Ca_Desig_Chr04               | 2999849                        | (T/C)       |
| 27390       | CadSNP2985     | <i>Desi</i>      | Ca_Desig_Chr04               | 3006532                        | (A/G)       |
| 27391       | CadSNP2986     | <i>Desi</i>      | Ca_Desig_Chr04               | 3006693                        | (C/T)       |
| 27392       | CadSNP2987     | <i>Desi</i>      | Ca_Desig_Chr04               | 3006687                        | (C/G)       |
| 27393       | CadSNP2988     | <i>Desi</i>      | Ca_Desig_Chr04               | 3006631                        | (C/A)       |
| 27394       | CadSNP2989     | <i>Desi</i>      | Ca_Desig_Chr04               | 3006619                        | (A/G)       |
| 27395       | CadSNP2990     | <i>Desi</i>      | Ca_Desig_Chr04               | 3010593                        | (A/G)       |
| 27396       | CadSNP2991     | <i>Desi</i>      | Ca_Desig_Chr04               | 3010706                        | (C/T)       |
| 27397       | CadSNP2992     | <i>Desi</i>      | Ca_Desig_Chr04               | 3010670                        | (T/A)       |

| <b>S.N.</b> | <b>SNP IDs</b> | <b>Cultivars</b> | <b>Chromosomes/scaffolds</b> | <b>Physical positions (bp)</b> | <b>SNPs</b> |
|-------------|----------------|------------------|------------------------------|--------------------------------|-------------|
| 27398       | CadSNP2993     | <i>Desi</i>      | Ca_Desig_Chr04               | 3055686                        | (A/C)       |
| 27399       | CadSNP2994     | <i>Desi</i>      | Ca_Desig_Chr04               | 3055720                        | (G/A)       |
| 27400       | CadSNP2995     | <i>Desi</i>      | Ca_Desig_Chr04               | 3063731                        | (C/T)       |
| 27401       | CadSNP2996     | <i>Desi</i>      | Ca_Desig_Chr04               | 3063862                        | (C/A)       |
| 27402       | CadSNP2997     | <i>Desi</i>      | Ca_Desig_Chr04               | 3063854                        | (G/A)       |
| 27403       | CadSNP2998     | <i>Desi</i>      | Ca_Desig_Chr04               | 3063852                        | (A/G)       |
| 27404       | CadSNP2999     | <i>Desi</i>      | Ca_Desig_Chr04               | 3063851                        | (G/T)       |
| 27405       | CadSNP3000     | <i>Desi</i>      | Ca_Desig_Chr04               | 3063807                        | (T/C)       |
| 27406       | CadSNP3001     | <i>Desi</i>      | Ca_Desig_Chr04               | 3070824                        | (G/A)       |
| 27407       | CadSNP3002     | <i>Desi</i>      | Ca_Desig_Chr04               | 3070931                        | (G/A)       |
| 27408       | CadSNP3003     | <i>Desi</i>      | Ca_Desig_Chr04               | 3070862                        | (C/T)       |
| 27409       | CadSNP3004     | <i>Desi</i>      | Ca_Desig_Chr04               | 3070859                        | (T/G)       |
| 27410       | CadSNP3005     | <i>Desi</i>      | Ca_Desig_Chr04               | 3070853                        | (C/T)       |
| 27411       | CadSNP3006     | <i>Desi</i>      | Ca_Desig_Chr04               | 3137877                        | (T/C)       |
| 27412       | CadSNP3007     | <i>Desi</i>      | Ca_Desig_Chr04               | 3163309                        | (A/G)       |
| 27413       | CadSNP3008     | <i>Desi</i>      | Ca_Desig_Chr04               | 3163344                        | (G/C)       |
| 27414       | CadSNP3009     | <i>Desi</i>      | Ca_Desig_Chr04               | 3180685                        | (T/C)       |
| 27415       | CadSNP3010     | <i>Desi</i>      | Ca_Desig_Chr04               | 3180657                        | (A/C)       |
| 27416       | CadSNP3011     | <i>Desi</i>      | Ca_Desig_Chr04               | 3248892                        | (C/T)       |
| 27417       | CadSNP3012     | <i>Desi</i>      | Ca_Desig_Chr04               | 3248872                        | (G/C)       |
| 27418       | CadSNP3013     | <i>Desi</i>      | Ca_Desig_Chr04               | 3343694                        | (C/T)       |
| 27419       | CadSNP3014     | <i>Desi</i>      | Ca_Desig_Chr04               | 3343721                        | (A/T)       |
| 27420       | CadSNP3015     | <i>Desi</i>      | Ca_Desig_Chr04               | 3343723                        | (A/G)       |
| 27421       | CadSNP3016     | <i>Desi</i>      | Ca_Desig_Chr04               | 3343827                        | (G/A)       |
| 27422       | CadSNP3017     | <i>Desi</i>      | Ca_Desig_Chr04               | 3379061                        | (A/G)       |
| 27423       | CadSNP3018     | <i>Desi</i>      | Ca_Desig_Chr04               | 3379084                        | (C/T)       |
| 27424       | CadSNP3019     | <i>Desi</i>      | Ca_Desig_Chr04               | 3379088                        | (T/C)       |
| 27425       | CadSNP3020     | <i>Desi</i>      | Ca_Desig_Chr04               | 3379091                        | (A/T)       |
| 27426       | CadSNP3021     | <i>Desi</i>      | Ca_Desig_Chr04               | 3379100                        | (C/T)       |
| 27427       | CadSNP3022     | <i>Desi</i>      | Ca_Desig_Chr04               | 3379109                        | (C/T)       |
| 27428       | CadSNP3023     | <i>Desi</i>      | Ca_Desig_Chr04               | 3379122                        | (T/C)       |
| 27429       | CadSNP3024     | <i>Desi</i>      | Ca_Desig_Chr04               | 3393909                        | (C/T)       |
| 27430       | CadSNP3025     | <i>Desi</i>      | Ca_Desig_Chr04               | 3414945                        | (G/T)       |
| 27431       | CadSNP3026     | <i>Desi</i>      | Ca_Desig_Chr04               | 3417271                        | (T/C)       |
| 27432       | CadSNP3027     | <i>Desi</i>      | Ca_Desig_Chr04               | 3417366                        | (T/C)       |
| 27433       | CadSNP3028     | <i>Desi</i>      | Ca_Desig_Chr04               | 3440152                        | (T/A)       |
| 27434       | CadSNP3029     | <i>Desi</i>      | Ca_Desig_Chr04               | 3475260                        | (A/T)       |
| 27435       | CadSNP3030     | <i>Desi</i>      | Ca_Desig_Chr04               | 3584126                        | (C/T)       |

| <b>S.N.</b> | <b>SNP IDs</b> | <b>Cultivars</b> | <b>Chromosomes/scaffolds</b> | <b>Physical positions (bp)</b> | <b>SNPs</b> |
|-------------|----------------|------------------|------------------------------|--------------------------------|-------------|
| 27436       | CadSNP3031     | <i>Desi</i>      | Ca_Desig_Chr04               | 3596680                        | (T/G)       |
| 27437       | CadSNP3032     | <i>Desi</i>      | Ca_Desig_Chr04               | 3596678                        | (T/C)       |
| 27438       | CadSNP3033     | <i>Desi</i>      | Ca_Desig_Chr04               | 3638644                        | (A/G)       |
| 27439       | CadSNP3034     | <i>Desi</i>      | Ca_Desig_Chr04               | 3638688                        | (T/C)       |
| 27440       | CadSNP3035     | <i>Desi</i>      | Ca_Desig_Chr04               | 3638662                        | (G/T)       |
| 27441       | CadSNP3036     | <i>Desi</i>      | Ca_Desig_Chr04               | 3638653                        | (A/G)       |
| 27442       | CadSNP3037     | <i>Desi</i>      | Ca_Desig_Chr04               | 3765015                        | (G/A)       |
| 27443       | CadSNP3038     | <i>Desi</i>      | Ca_Desig_Chr04               | 3765009                        | (T/C)       |
| 27444       | CadSNP3039     | <i>Desi</i>      | Ca_Desig_Chr04               | 3765003                        | (G/A)       |
| 27445       | CadSNP3040     | <i>Desi</i>      | Ca_Desig_Chr04               | 3764979                        | (A/G)       |
| 27446       | CadSNP3041     | <i>Desi</i>      | Ca_Desig_Chr04               | 3764973                        | (T/C)       |
| 27447       | CadSNP3042     | <i>Desi</i>      | Ca_Desig_Chr04               | 3766974                        | (G/C)       |
| 27448       | CadSNP3043     | <i>Desi</i>      | Ca_Desig_Chr04               | 3766890                        | (A/G)       |
| 27449       | CadSNP3044     | <i>Desi</i>      | Ca_Desig_Chr04               | 3789531                        | (C/G)       |
| 27450       | CadSNP3045     | <i>Desi</i>      | Ca_Desig_Chr04               | 3789535                        | (G/A)       |
| 27451       | CadSNP3046     | <i>Desi</i>      | Ca_Desig_Chr04               | 3798421                        | (T/G)       |
| 27452       | CadSNP3047     | <i>Desi</i>      | Ca_Desig_Chr04               | 3798614                        | (G/A)       |
| 27453       | CadSNP3048     | <i>Desi</i>      | Ca_Desig_Chr04               | 3802820                        | (C/T)       |
| 27454       | CadSNP3049     | <i>Desi</i>      | Ca_Desig_Chr04               | 3859366                        | (G/A)       |
| 27455       | CadSNP3050     | <i>Desi</i>      | Ca_Desig_Chr04               | 3859391                        | (C/G)       |
| 27456       | CadSNP3051     | <i>Desi</i>      | Ca_Desig_Chr04               | 3859443                        | (T/G)       |
| 27457       | CadSNP3052     | <i>Desi</i>      | Ca_Desig_Chr04               | 3870983                        | (T/C)       |
| 27458       | CadSNP3053     | <i>Desi</i>      | Ca_Desig_Chr04               | 3870991                        | (C/G)       |
| 27459       | CadSNP3054     | <i>Desi</i>      | Ca_Desig_Chr04               | 3875100                        | (C/A)       |
| 27460       | CadSNP3055     | <i>Desi</i>      | Ca_Desig_Chr04               | 3904156                        | (G/A)       |
| 27461       | CadSNP3056     | <i>Desi</i>      | Ca_Desig_Chr04               | 3904138                        | (G/A)       |
| 27462       | CadSNP3057     | <i>Desi</i>      | Ca_Desig_Chr04               | 3920146                        | (A/C)       |
| 27463       | CadSNP3058     | <i>Desi</i>      | Ca_Desig_Chr04               | 3920243                        | (T/C)       |
| 27464       | CadSNP3059     | <i>Desi</i>      | Ca_Desig_Chr04               | 3973039                        | (A/G)       |
| 27465       | CadSNP3060     | <i>Desi</i>      | Ca_Desig_Chr04               | 3973090                        | (G/A)       |
| 27466       | CadSNP3061     | <i>Desi</i>      | Ca_Desig_Chr04               | 3973244                        | (C/A)       |
| 27467       | CadSNP3062     | <i>Desi</i>      | Ca_Desig_Chr04               | 3973229                        | (A/G)       |
| 27468       | CadSNP3063     | <i>Desi</i>      | Ca_Desig_Chr04               | 3973220                        | (T/C)       |
| 27469       | CadSNP3064     | <i>Desi</i>      | Ca_Desig_Chr04               | 3973216                        | (T/C)       |
| 27470       | CadSNP3065     | <i>Desi</i>      | Ca_Desig_Chr04               | 4013701                        | (G/T)       |
| 27471       | CadSNP3066     | <i>Desi</i>      | Ca_Desig_Chr04               | 4013641                        | (C/T)       |
| 27472       | CadSNP3067     | <i>Desi</i>      | Ca_Desig_Chr04               | 4013759                        | (T/A)       |
| 27473       | CadSNP3068     | <i>Desi</i>      | Ca_Desig_Chr04               | 4013760                        | (C/A)       |

| <b>S.N.</b> | <b>SNP IDs</b> | <b>Cultivars</b> | <b>Chromosomes/scaffolds</b> | <b>Physical positions (bp)</b> | <b>SNPs</b> |
|-------------|----------------|------------------|------------------------------|--------------------------------|-------------|
| 27474       | CadSNP3069     | <i>Desi</i>      | Ca_Desig_Chr04               | 4013761                        | (T/A)       |
| 27475       | CadSNP3070     | <i>Desi</i>      | Ca_Desig_Chr04               | 4013763                        | (T/A)       |
| 27476       | CadSNP3071     | <i>Desi</i>      | Ca_Desig_Chr04               | 4013764                        | (G/T)       |
| 27477       | CadSNP3072     | <i>Desi</i>      | Ca_Desig_Chr04               | 4013765                        | (A/G)       |
| 27478       | CadSNP3073     | <i>Desi</i>      | Ca_Desig_Chr04               | 4013888                        | (G/C)       |
| 27479       | CadSNP3074     | <i>Desi</i>      | Ca_Desig_Chr04               | 4013840                        | (G/C)       |
| 27480       | CadSNP3075     | <i>Desi</i>      | Ca_Desig_Chr04               | 4018698                        | (A/T)       |
| 27481       | CadSNP3076     | <i>Desi</i>      | Ca_Desig_Chr04               | 4018706                        | (T/C)       |
| 27482       | CadSNP3077     | <i>Desi</i>      | Ca_Desig_Chr04               | 4018747                        | (G/A)       |
| 27483       | CadSNP3078     | <i>Desi</i>      | Ca_Desig_Chr04               | 4018828                        | (G/C)       |
| 27484       | CadSNP3079     | <i>Desi</i>      | Ca_Desig_Chr04               | 4018839                        | (A/T)       |
| 27485       | CadSNP3080     | <i>Desi</i>      | Ca_Desig_Chr04               | 4018936                        | (A/G)       |
| 27486       | CadSNP3081     | <i>Desi</i>      | Ca_Desig_Chr04               | 4018921                        | (G/A)       |
| 27487       | CadSNP3082     | <i>Desi</i>      | Ca_Desig_Chr04               | 4028673                        | (A/G)       |
| 27488       | CadSNP3083     | <i>Desi</i>      | Ca_Desig_Chr04               | 4053311                        | (G/A)       |
| 27489       | CadSNP3084     | <i>Desi</i>      | Ca_Desig_Chr04               | 4053260                        | (A/G)       |
| 27490       | CadSNP3085     | <i>Desi</i>      | Ca_Desig_Chr04               | 4053359                        | (G/A)       |
| 27491       | CadSNP3086     | <i>Desi</i>      | Ca_Desig_Chr04               | 4053361                        | (G/T)       |
| 27492       | CadSNP3087     | <i>Desi</i>      | Ca_Desig_Chr04               | 4053362                        | (G/T)       |
| 27493       | CadSNP3088     | <i>Desi</i>      | Ca_Desig_Chr04               | 4053386                        | (T/C)       |
| 27494       | CadSNP3089     | <i>Desi</i>      | Ca_Desig_Chr04               | 4086122                        | (G/A)       |
| 27495       | CadSNP3090     | <i>Desi</i>      | Ca_Desig_Chr04               | 4087351                        | (A/G)       |
| 27496       | CadSNP3091     | <i>Desi</i>      | Ca_Desig_Chr04               | 4087415                        | (T/C)       |
| 27497       | CadSNP3092     | <i>Desi</i>      | Ca_Desig_Chr04               | 4087412                        | (G/A)       |
| 27498       | CadSNP3093     | <i>Desi</i>      | Ca_Desig_Chr04               | 4087353                        | (T/A)       |
| 27499       | CadSNP3094     | <i>Desi</i>      | Ca_Desig_Chr04               | 4102649                        | (C/G)       |
| 27500       | CadSNP3095     | <i>Desi</i>      | Ca_Desig_Chr04               | 4102650                        | (T/A)       |
| 27501       | CadSNP3096     | <i>Desi</i>      | Ca_Desig_Chr04               | 4102656                        | (T/C)       |
| 27502       | CadSNP3097     | <i>Desi</i>      | Ca_Desig_Chr04               | 4102682                        | (C/A)       |
| 27503       | CadSNP3098     | <i>Desi</i>      | Ca_Desig_Chr04               | 4102698                        | (T/C)       |
| 27504       | CadSNP3099     | <i>Desi</i>      | Ca_Desig_Chr04               | 4102704                        | (C/T)       |
| 27505       | CadSNP3100     | <i>Desi</i>      | Ca_Desig_Chr04               | 4102739                        | (A/G)       |
| 27506       | CadSNP3101     | <i>Desi</i>      | Ca_Desig_Chr04               | 4102711                        | (A/G)       |
| 27507       | CadSNP3102     | <i>Desi</i>      | Ca_Desig_Chr04               | 4102802                        | (T/C)       |
| 27508       | CadSNP3103     | <i>Desi</i>      | Ca_Desig_Chr04               | 4102808                        | (T/A)       |
| 27509       | CadSNP3104     | <i>Desi</i>      | Ca_Desig_Chr04               | 4102814                        | (T/C)       |
| 27510       | CadSNP3105     | <i>Desi</i>      | Ca_Desig_Chr04               | 4102817                        | (A/T)       |
| 27511       | CadSNP3106     | <i>Desi</i>      | Ca_Desig_Chr04               | 4102845                        | (G/A)       |

| <b>S.N.</b> | <b>SNP IDs</b> | <b>Cultivars</b> | <b>Chromosomes/scaffolds</b> | <b>Physical positions (bp)</b> | <b>SNPs</b> |
|-------------|----------------|------------------|------------------------------|--------------------------------|-------------|
| 27512       | CadSNP3107     | <i>Desi</i>      | Ca_Desig_Chr04               | 4102847                        | (G/T)       |
| 27513       | CadSNP3108     | <i>Desi</i>      | Ca_Desig_Chr04               | 4120065                        | (C/T)       |
| 27514       | CadSNP3109     | <i>Desi</i>      | Ca_Desig_Chr04               | 4120091                        | (T/G)       |
| 27515       | CadSNP3110     | <i>Desi</i>      | Ca_Desig_Chr04               | 4177588                        | (T/C)       |
| 27516       | CadSNP3111     | <i>Desi</i>      | Ca_Desig_Chr04               | 4218981                        | (A/C)       |
| 27517       | CadSNP3112     | <i>Desi</i>      | Ca_Desig_Chr04               | 4219063                        | (A/G)       |
| 27518       | CadSNP3113     | <i>Desi</i>      | Ca_Desig_Chr04               | 4219039                        | (G/A)       |
| 27519       | CadSNP3114     | <i>Desi</i>      | Ca_Desig_Chr04               | 4219027                        | (A/C)       |
| 27520       | CadSNP3115     | <i>Desi</i>      | Ca_Desig_Chr04               | 4271851                        | (C/T)       |
| 27521       | CadSNP3116     | <i>Desi</i>      | Ca_Desig_Chr04               | 4271993                        | (C/T)       |
| 27522       | CadSNP3117     | <i>Desi</i>      | Ca_Desig_Chr04               | 4272034                        | (T/G)       |
| 27523       | CadSNP3118     | <i>Desi</i>      | Ca_Desig_Chr04               | 4273233                        | (A/C)       |
| 27524       | CadSNP3119     | <i>Desi</i>      | Ca_Desig_Chr04               | 4273166                        | (T/C)       |
| 27525       | CadSNP3120     | <i>Desi</i>      | Ca_Desig_Chr04               | 4277475                        | (T/A)       |
| 27526       | CadSNP3121     | <i>Desi</i>      | Ca_Desig_Chr04               | 4412994                        | (C/A)       |
| 27527       | CadSNP3122     | <i>Desi</i>      | Ca_Desig_Chr04               | 4424794                        | (C/A)       |
| 27528       | CadSNP3123     | <i>Desi</i>      | Ca_Desig_Chr04               | 4424788                        | (C/T)       |
| 27529       | CadSNP3124     | <i>Desi</i>      | Ca_Desig_Chr04               | 4442419                        | (A/G)       |
| 27530       | CadSNP3125     | <i>Desi</i>      | Ca_Desig_Chr04               | 4468697                        | (A/G)       |
| 27531       | CadSNP3126     | <i>Desi</i>      | Ca_Desig_Chr04               | 4468755                        | (T/C)       |
| 27532       | CadSNP3127     | <i>Desi</i>      | Ca_Desig_Chr04               | 4482302                        | (C/T)       |
| 27533       | CadSNP3128     | <i>Desi</i>      | Ca_Desig_Chr04               | 4482370                        | (G/C)       |
| 27534       | CadSNP3129     | <i>Desi</i>      | Ca_Desig_Chr04               | 4556180                        | (C/T)       |
| 27535       | CadSNP3130     | <i>Desi</i>      | Ca_Desig_Chr04               | 4556221                        | (A/T)       |
| 27536       | CadSNP3131     | <i>Desi</i>      | Ca_Desig_Chr04               | 4592602                        | (G/A)       |
| 27537       | CadSNP3132     | <i>Desi</i>      | Ca_Desig_Chr04               | 4592738                        | (T/A)       |
| 27538       | CadSNP3133     | <i>Desi</i>      | Ca_Desig_Chr04               | 4592785                        | (T/C)       |
| 27539       | CadSNP3134     | <i>Desi</i>      | Ca_Desig_Chr04               | 4613329                        | (A/G)       |
| 27540       | CadSNP3135     | <i>Desi</i>      | Ca_Desig_Chr04               | 4652983                        | (A/G)       |
| 27541       | CadSNP3136     | <i>Desi</i>      | Ca_Desig_Chr04               | 4652989                        | (A/G)       |
| 27542       | CadSNP3137     | <i>Desi</i>      | Ca_Desig_Chr04               | 4653036                        | (A/C)       |
| 27543       | CadSNP3138     | <i>Desi</i>      | Ca_Desig_Chr04               | 4687385                        | (T/C)       |
| 27544       | CadSNP3139     | <i>Desi</i>      | Ca_Desig_Chr04               | 4687388                        | (C/G)       |
| 27545       | CadSNP3140     | <i>Desi</i>      | Ca_Desig_Chr04               | 4690525                        | (A/C)       |
| 27546       | CadSNP3141     | <i>Desi</i>      | Ca_Desig_Chr04               | 4701443                        | (T/A)       |
| 27547       | CadSNP3142     | <i>Desi</i>      | Ca_Desig_Chr04               | 4701465                        | (G/C)       |
| 27548       | CadSNP3143     | <i>Desi</i>      | Ca_Desig_Chr04               | 4701545                        | (C/G)       |
| 27549       | CadSNP3144     | <i>Desi</i>      | Ca_Desig_Chr04               | 4701605                        | (G/A)       |

| <b>S.N.</b> | <b>SNP IDs</b> | <b>Cultivars</b> | <b>Chromosomes/scaffolds</b> | <b>Physical positions (bp)</b> | <b>SNPs</b> |
|-------------|----------------|------------------|------------------------------|--------------------------------|-------------|
| 27550       | CadSNP3145     | <i>Desi</i>      | Ca_Desig_Chr04               | 4701701                        | (G/A)       |
| 27551       | CadSNP3146     | <i>Desi</i>      | Ca_Desig_Chr04               | 4701677                        | (G/A)       |
| 27552       | CadSNP3147     | <i>Desi</i>      | Ca_Desig_Chr04               | 4714703                        | (G/A)       |
| 27553       | CadSNP3148     | <i>Desi</i>      | Ca_Desig_Chr04               | 4765057                        | (T/G)       |
| 27554       | CadSNP3149     | <i>Desi</i>      | Ca_Desig_Chr04               | 4768397                        | (C/A)       |
| 27555       | CadSNP3150     | <i>Desi</i>      | Ca_Desig_Chr04               | 4768373                        | (C/T)       |
| 27556       | CadSNP3151     | <i>Desi</i>      | Ca_Desig_Chr04               | 4768426                        | (A/C)       |
| 27557       | CadSNP3152     | <i>Desi</i>      | Ca_Desig_Chr04               | 4768507                        | (A/C)       |
| 27558       | CadSNP3153     | <i>Desi</i>      | Ca_Desig_Chr04               | 4769476                        | (G/A)       |
| 27559       | CadSNP3154     | <i>Desi</i>      | Ca_Desig_Chr04               | 4769498                        | (G/A)       |
| 27560       | CadSNP3155     | <i>Desi</i>      | Ca_Desig_Chr04               | 4769516                        | (G/C)       |
| 27561       | CadSNP3156     | <i>Desi</i>      | Ca_Desig_Chr04               | 4769524                        | (G/A)       |
| 27562       | CadSNP3157     | <i>Desi</i>      | Ca_Desig_Chr04               | 4769541                        | (A/T)       |
| 27563       | CadSNP3158     | <i>Desi</i>      | Ca_Desig_Chr04               | 4769570                        | (A/G)       |
| 27564       | CadSNP3159     | <i>Desi</i>      | Ca_Desig_Chr04               | 4769567                        | (G/A)       |
| 27565       | CadSNP3160     | <i>Desi</i>      | Ca_Desig_Chr04               | 4769546                        | (C/T)       |
| 27566       | CadSNP3161     | <i>Desi</i>      | Ca_Desig_Chr04               | 4817421                        | (C/T)       |
| 27567       | CadSNP3162     | <i>Desi</i>      | Ca_Desig_Chr04               | 4817433                        | (G/C)       |
| 27568       | CadSNP3163     | <i>Desi</i>      | Ca_Desig_Chr04               | 4817665                        | (C/T)       |
| 27569       | CadSNP3164     | <i>Desi</i>      | Ca_Desig_Chr04               | 4837373                        | (G/T)       |
| 27570       | CadSNP3165     | <i>Desi</i>      | Ca_Desig_Chr04               | 4837427                        | (C/G)       |
| 27571       | CadSNP3166     | <i>Desi</i>      | Ca_Desig_Chr04               | 4837616                        | (G/A)       |
| 27572       | CadSNP3167     | <i>Desi</i>      | Ca_Desig_Chr04               | 4837602                        | (G/A)       |
| 27573       | CadSNP3168     | <i>Desi</i>      | Ca_Desig_Chr04               | 4837547                        | (T/A)       |
| 27574       | CadSNP3169     | <i>Desi</i>      | Ca_Desig_Chr04               | 4878370                        | (A/T)       |
| 27575       | CadSNP3170     | <i>Desi</i>      | Ca_Desig_Chr04               | 4878419                        | (C/T)       |
| 27576       | CadSNP3171     | <i>Desi</i>      | Ca_Desig_Chr04               | 4878512                        | (G/C)       |
| 27577       | CadSNP3172     | <i>Desi</i>      | Ca_Desig_Chr04               | 4909312                        | (C/A)       |
| 27578       | CadSNP3173     | <i>Desi</i>      | Ca_Desig_Chr04               | 4936836                        | (G/A)       |
| 27579       | CadSNP3174     | <i>Desi</i>      | Ca_Desig_Chr04               | 5028157                        | (C/T)       |
| 27580       | CadSNP3175     | <i>Desi</i>      | Ca_Desig_Chr04               | 5028184                        | (T/C)       |
| 27581       | CadSNP3176     | <i>Desi</i>      | Ca_Desig_Chr04               | 5032143                        | (A/G)       |
| 27582       | CadSNP3177     | <i>Desi</i>      | Ca_Desig_Chr04               | 5032208                        | (C/T)       |
| 27583       | CadSNP3178     | <i>Desi</i>      | Ca_Desig_Chr04               | 5075690                        | (A/T)       |
| 27584       | CadSNP3179     | <i>Desi</i>      | Ca_Desig_Chr04               | 5075689                        | (A/T)       |
| 27585       | CadSNP3180     | <i>Desi</i>      | Ca_Desig_Chr04               | 5075688                        | (A/T)       |
| 27586       | CadSNP3181     | <i>Desi</i>      | Ca_Desig_Chr04               | 5097092                        | (A/G)       |
| 27587       | CadSNP3182     | <i>Desi</i>      | Ca_Desig_Chr04               | 5097123                        | (C/G)       |



| <b>S.N.</b> | <b>SNP IDs</b> | <b>Cultivars</b> | <b>Chromosomes/scaffolds</b> | <b>Physical positions (bp)</b> | <b>SNPs</b> |
|-------------|----------------|------------------|------------------------------|--------------------------------|-------------|
| 27588       | CadSNP3183     | <i>Desi</i>      | Ca_Desig_Chr04               | 5097133                        | (C/T)       |
| 27589       | CadSNP3184     | <i>Desi</i>      | Ca_Desig_Chr04               | 5097230                        | (G/C)       |
| 27590       | CadSNP3185     | <i>Desi</i>      | Ca_Desig_Chr04               | 5097212                        | (A/C)       |
| 27591       | CadSNP3186     | <i>Desi</i>      | Ca_Desig_Chr04               | 5097206                        | (A/C)       |
| 27592       | CadSNP3187     | <i>Desi</i>      | Ca_Desig_Chr04               | 5408962                        | (C/T)       |
| 27593       | CadSNP3188     | <i>Desi</i>      | Ca_Desig_Chr04               | 5409140                        | (A/G)       |
| 27594       | CadSNP3189     | <i>Desi</i>      | Ca_Desig_Chr04               | 5410884                        | (C/T)       |
| 27595       | CadSNP3190     | <i>Desi</i>      | Ca_Desig_Chr04               | 5450691                        | (C/A)       |
| 27596       | CadSNP3191     | <i>Desi</i>      | Ca_Desig_Chr04               | 5450850                        | (C/T)       |
| 27597       | CadSNP3192     | <i>Desi</i>      | Ca_Desig_Chr04               | 5533435                        | (T/G)       |
| 27598       | CadSNP3193     | <i>Desi</i>      | Ca_Desig_Chr04               | 5533572                        | (A/C)       |
| 27599       | CadSNP3194     | <i>Desi</i>      | Ca_Desig_Chr04               | 5537247                        | (A/G)       |
| 27600       | CadSNP3195     | <i>Desi</i>      | Ca_Desig_Chr04               | 5537277                        | (A/G)       |
| 27601       | CadSNP3196     | <i>Desi</i>      | Ca_Desig_Chr04               | 5547317                        | (A/T)       |
| 27602       | CadSNP3197     | <i>Desi</i>      | Ca_Desig_Chr04               | 5571273                        | (G/A)       |
| 27603       | CadSNP3198     | <i>Desi</i>      | Ca_Desig_Chr04               | 5580087                        | (T/C)       |
| 27604       | CadSNP3199     | <i>Desi</i>      | Ca_Desig_Chr04               | 5610496                        | (A/G)       |
| 27605       | CadSNP3200     | <i>Desi</i>      | Ca_Desig_Chr04               | 5610487                        | (C/T)       |
| 27606       | CadSNP3201     | <i>Desi</i>      | Ca_Desig_Chr04               | 5610468                        | (G/T)       |
| 27607       | CadSNP3202     | <i>Desi</i>      | Ca_Desig_Chr04               | 5610436                        | (T/C)       |
| 27608       | CadSNP3203     | <i>Desi</i>      | Ca_Desig_Chr04               | 5610430                        | (C/T)       |
| 27609       | CadSNP3204     | <i>Desi</i>      | Ca_Desig_Chr04               | 5610427                        | (T/C)       |
| 27610       | CadSNP3205     | <i>Desi</i>      | Ca_Desig_Chr04               | 5610421                        | (A/G)       |
| 27611       | CadSNP3206     | <i>Desi</i>      | Ca_Desig_Chr04               | 5610412                        | (C/T)       |
| 27612       | CadSNP3207     | <i>Desi</i>      | Ca_Desig_Chr04               | 5678590                        | (G/A)       |
| 27613       | CadSNP3208     | <i>Desi</i>      | Ca_Desig_Chr04               | 5678708                        | (T/A)       |
| 27614       | CadSNP3209     | <i>Desi</i>      | Ca_Desig_Chr04               | 5678706                        | (T/G)       |
| 27615       | CadSNP3210     | <i>Desi</i>      | Ca_Desig_Chr04               | 5678705                        | (T/A)       |
| 27616       | CadSNP3211     | <i>Desi</i>      | Ca_Desig_Chr04               | 5949743                        | (T/G)       |
| 27617       | CadSNP3212     | <i>Desi</i>      | Ca_Desig_Chr04               | 6008718                        | (C/G)       |
| 27618       | CadSNP3213     | <i>Desi</i>      | Ca_Desig_Chr04               | 6017153                        | (T/G)       |
| 27619       | CadSNP3214     | <i>Desi</i>      | Ca_Desig_Chr04               | 6188718                        | (C/T)       |
| 27620       | CadSNP3215     | <i>Desi</i>      | Ca_Desig_Chr04               | 6278573                        | (C/A)       |
| 27621       | CadSNP3216     | <i>Desi</i>      | Ca_Desig_Chr04               | 6325277                        | (T/G)       |
| 27622       | CadSNP3217     | <i>Desi</i>      | Ca_Desig_Chr04               | 6326257                        | (C/T)       |
| 27623       | CadSNP3218     | <i>Desi</i>      | Ca_Desig_Chr04               | 6512019                        | (G/A)       |
| 27624       | CadSNP3219     | <i>Desi</i>      | Ca_Desig_Chr04               | 6512198                        | (T/G)       |
| 27625       | CadSNP3220     | <i>Desi</i>      | Ca_Desig_Chr04               | 7034202                        | (C/T)       |

| <b>S.N.</b> | <b>SNP IDs</b> | <b>Cultivars</b> | <b>Chromosomes/scaffolds</b> | <b>Physical positions (bp)</b> | <b>SNPs</b> |
|-------------|----------------|------------------|------------------------------|--------------------------------|-------------|
| 27626       | CadSNP3221     | <i>Desi</i>      | Ca_Desig_Chr04               | 7035566                        | (C/T)       |
| 27627       | CadSNP3222     | <i>Desi</i>      | Ca_Desig_Chr04               | 7035565                        | (A/G)       |
| 27628       | CadSNP3223     | <i>Desi</i>      | Ca_Desig_Chr04               | 7035560                        | (C/A)       |
| 27629       | CadSNP3224     | <i>Desi</i>      | Ca_Desig_Chr04               | 7082605                        | (C/T)       |
| 27630       | CadSNP3225     | <i>Desi</i>      | Ca_Desig_Chr04               | 7082610                        | (C/T)       |
| 27631       | CadSNP3226     | <i>Desi</i>      | Ca_Desig_Chr04               | 7175365                        | (A/T)       |
| 27632       | CadSNP3227     | <i>Desi</i>      | Ca_Desig_Chr04               | 7176085                        | (T/G)       |
| 27633       | CadSNP3228     | <i>Desi</i>      | Ca_Desig_Chr04               | 7258905                        | (G/A)       |
| 27634       | CadSNP3229     | <i>Desi</i>      | Ca_Desig_Chr04               | 7261485                        | (A/G)       |
| 27635       | CadSNP3230     | <i>Desi</i>      | Ca_Desig_Chr04               | 7262099                        | (A/G)       |
| 27636       | CadSNP3231     | <i>Desi</i>      | Ca_Desig_Chr04               | 7267132                        | (G/A)       |
| 27637       | CadSNP3232     | <i>Desi</i>      | Ca_Desig_Chr04               | 7267139                        | (C/T)       |
| 27638       | CadSNP3233     | <i>Desi</i>      | Ca_Desig_Chr04               | 7345014                        | (G/A)       |
| 27639       | CadSNP3234     | <i>Desi</i>      | Ca_Desig_Chr04               | 7345027                        | (T/G)       |
| 27640       | CadSNP3235     | <i>Desi</i>      | Ca_Desig_Chr04               | 7359134                        | (T/C)       |
| 27641       | CadSNP3236     | <i>Desi</i>      | Ca_Desig_Chr04               | 7386701                        | (T/C)       |
| 27642       | CadSNP3237     | <i>Desi</i>      | Ca_Desig_Chr04               | 7386713                        | (G/A)       |
| 27643       | CadSNP3238     | <i>Desi</i>      | Ca_Desig_Chr04               | 7411522                        | (A/T)       |
| 27644       | CadSNP3239     | <i>Desi</i>      | Ca_Desig_Chr04               | 7491353                        | (A/T)       |
| 27645       | CadSNP3240     | <i>Desi</i>      | Ca_Desig_Chr04               | 7491358                        | (C/A)       |
| 27646       | CadSNP3241     | <i>Desi</i>      | Ca_Desig_Chr04               | 7491365                        | (T/G)       |
| 27647       | CadSNP3242     | <i>Desi</i>      | Ca_Desig_Chr04               | 7509469                        | (T/C)       |
| 27648       | CadSNP3243     | <i>Desi</i>      | Ca_Desig_Chr04               | 7509510                        | (A/G)       |
| 27649       | CadSNP3244     | <i>Desi</i>      | Ca_Desig_Chr04               | 7509523                        | (A/T)       |
| 27650       | CadSNP3245     | <i>Desi</i>      | Ca_Desig_Chr04               | 7509540                        | (C/T)       |
| 27651       | CadSNP3246     | <i>Desi</i>      | Ca_Desig_Chr04               | 7522422                        | (A/G)       |
| 27652       | CadSNP3247     | <i>Desi</i>      | Ca_Desig_Chr04               | 7601501                        | (A/G)       |
| 27653       | CadSNP3248     | <i>Desi</i>      | Ca_Desig_Chr04               | 7601504                        | (G/T)       |
| 27654       | CadSNP3249     | <i>Desi</i>      | Ca_Desig_Chr04               | 7601564                        | (G/A)       |
| 27655       | CadSNP3250     | <i>Desi</i>      | Ca_Desig_Chr04               | 7601698                        | (A/C)       |
| 27656       | CadSNP3251     | <i>Desi</i>      | Ca_Desig_Chr04               | 7602569                        | (A/T)       |
| 27657       | CadSNP3252     | <i>Desi</i>      | Ca_Desig_Chr04               | 7632892                        | (T/G)       |
| 27658       | CadSNP3253     | <i>Desi</i>      | Ca_Desig_Chr04               | 7643273                        | (C/T)       |
| 27659       | CadSNP3254     | <i>Desi</i>      | Ca_Desig_Chr04               | 7643413                        | (C/T)       |
| 27660       | CadSNP3255     | <i>Desi</i>      | Ca_Desig_Chr04               | 7647357                        | (C/T)       |
| 27661       | CadSNP3256     | <i>Desi</i>      | Ca_Desig_Chr04               | 7647362                        | (T/C)       |
| 27662       | CadSNP3257     | <i>Desi</i>      | Ca_Desig_Chr04               | 7647369                        | (T/C)       |
| 27663       | CadSNP3258     | <i>Desi</i>      | Ca_Desig_Chr04               | 7647405                        | (C/G)       |

| <b>S.N.</b> | <b>SNP IDs</b> | <b>Cultivars</b> | <b>Chromosomes/scaffolds</b> | <b>Physical positions (bp)</b> | <b>SNPs</b> |
|-------------|----------------|------------------|------------------------------|--------------------------------|-------------|
| 27664       | CadSNP3259     | <i>Desi</i>      | Ca_Desig_Chr04               | 7647636                        | (A/G)       |
| 27665       | CadSNP3260     | <i>Desi</i>      | Ca_Desig_Chr04               | 7647647                        | (T/A)       |
| 27666       | CadSNP3261     | <i>Desi</i>      | Ca_Desig_Chr04               | 7647648                        | (T/A)       |
| 27667       | CadSNP3262     | <i>Desi</i>      | Ca_Desig_Chr04               | 7680278                        | (T/C)       |
| 27668       | CadSNP3263     | <i>Desi</i>      | Ca_Desig_Chr04               | 7680254                        | (A/C)       |
| 27669       | CadSNP3264     | <i>Desi</i>      | Ca_Desig_Chr04               | 7680251                        | (A/C)       |
| 27670       | CadSNP3265     | <i>Desi</i>      | Ca_Desig_Chr04               | 7734129                        | (G/A)       |
| 27671       | CadSNP3266     | <i>Desi</i>      | Ca_Desig_Chr04               | 7744960                        | (C/T)       |
| 27672       | CadSNP3267     | <i>Desi</i>      | Ca_Desig_Chr04               | 7744977                        | (G/T)       |
| 27673       | CadSNP3268     | <i>Desi</i>      | Ca_Desig_Chr04               | 7745006                        | (T/C)       |
| 27674       | CadSNP3269     | <i>Desi</i>      | Ca_Desig_Chr04               | 7745012                        | (A/C)       |
| 27675       | CadSNP3270     | <i>Desi</i>      | Ca_Desig_Chr04               | 7745024                        | (C/A)       |
| 27676       | CadSNP3271     | <i>Desi</i>      | Ca_Desig_Chr04               | 7745029                        | (A/G)       |
| 27677       | CadSNP3272     | <i>Desi</i>      | Ca_Desig_Chr04               | 7745021                        | (C/T)       |
| 27678       | CadSNP3273     | <i>Desi</i>      | Ca_Desig_Chr04               | 7778312                        | (T/G)       |
| 27679       | CadSNP3274     | <i>Desi</i>      | Ca_Desig_Chr04               | 7789296                        | (C/T)       |
| 27680       | CadSNP3275     | <i>Desi</i>      | Ca_Desig_Chr04               | 7789300                        | (T/C)       |
| 27681       | CadSNP3276     | <i>Desi</i>      | Ca_Desig_Chr04               | 7789365                        | (C/A)       |
| 27682       | CadSNP3277     | <i>Desi</i>      | Ca_Desig_Chr04               | 7797154                        | (C/G)       |
| 27683       | CadSNP3278     | <i>Desi</i>      | Ca_Desig_Chr04               | 7804249                        | (C/A)       |
| 27684       | CadSNP3279     | <i>Desi</i>      | Ca_Desig_Chr04               | 7804240                        | (C/G)       |
| 27685       | CadSNP3280     | <i>Desi</i>      | Ca_Desig_Chr04               | 7804466                        | (A/G)       |
| 27686       | CadSNP3281     | <i>Desi</i>      | Ca_Desig_Chr04               | 7804446                        | (C/G)       |
| 27687       | CadSNP3282     | <i>Desi</i>      | Ca_Desig_Chr04               | 7804437                        | (C/G)       |
| 27688       | CadSNP3283     | <i>Desi</i>      | Ca_Desig_Chr04               | 7823630                        | (C/T)       |
| 27689       | CadSNP3284     | <i>Desi</i>      | Ca_Desig_Chr04               | 7823601                        | (G/C)       |
| 27690       | CadSNP3285     | <i>Desi</i>      | Ca_Desig_Chr04               | 7823585                        | (G/A)       |
| 27691       | CadSNP3286     | <i>Desi</i>      | Ca_Desig_Chr04               | 7823970                        | (G/T)       |
| 27692       | CadSNP3287     | <i>Desi</i>      | Ca_Desig_Chr04               | 7864254                        | (C/T)       |
| 27693       | CadSNP3288     | <i>Desi</i>      | Ca_Desig_Chr04               | 7886492                        | (T/C)       |
| 27694       | CadSNP3289     | <i>Desi</i>      | Ca_Desig_Chr04               | 7889802                        | (C/T)       |
| 27695       | CadSNP3290     | <i>Desi</i>      | Ca_Desig_Chr04               | 7889847                        | (C/T)       |
| 27696       | CadSNP3291     | <i>Desi</i>      | Ca_Desig_Chr04               | 7889963                        | (A/G)       |
| 27697       | CadSNP3292     | <i>Desi</i>      | Ca_Desig_Chr04               | 7897697                        | (A/T)       |
| 27698       | CadSNP3293     | <i>Desi</i>      | Ca_Desig_Chr04               | 7901647                        | (G/C)       |
| 27699       | CadSNP3294     | <i>Desi</i>      | Ca_Desig_Chr04               | 7934989                        | (G/A)       |
| 27700       | CadSNP3295     | <i>Desi</i>      | Ca_Desig_Chr04               | 7934938                        | (A/G)       |
| 27701       | CadSNP3296     | <i>Desi</i>      | Ca_Desig_Chr04               | 7968926                        | (G/C)       |

| <b>S.N.</b> | <b>SNP IDs</b> | <b>Cultivars</b> | <b>Chromosomes/scaffolds</b> | <b>Physical positions (bp)</b> | <b>SNPs</b> |
|-------------|----------------|------------------|------------------------------|--------------------------------|-------------|
| 27702       | CadSNP3297     | <i>Desi</i>      | Ca_Desig_Chr04               | 7979277                        | (A/T)       |
| 27703       | CadSNP3298     | <i>Desi</i>      | Ca_Desig_Chr04               | 7983120                        | (C/T)       |
| 27704       | CadSNP3299     | <i>Desi</i>      | Ca_Desig_Chr04               | 7992015                        | (A/G)       |
| 27705       | CadSNP3300     | <i>Desi</i>      | Ca_Desig_Chr04               | 7992027                        | (T/G)       |
| 27706       | CadSNP3301     | <i>Desi</i>      | Ca_Desig_Chr04               | 8001938                        | (T/C)       |
| 27707       | CadSNP3302     | <i>Desi</i>      | Ca_Desig_Chr04               | 8009916                        | (C/G)       |
| 27708       | CadSNP3303     | <i>Desi</i>      | Ca_Desig_Chr04               | 8027509                        | (T/A)       |
| 27709       | CadSNP3304     | <i>Desi</i>      | Ca_Desig_Chr04               | 8043670                        | (G/C)       |
| 27710       | CadSNP3305     | <i>Desi</i>      | Ca_Desig_Chr04               | 8066452                        | (A/C)       |
| 27711       | CadSNP3306     | <i>Desi</i>      | Ca_Desig_Chr04               | 8081990                        | (T/C)       |
| 27712       | CadSNP3307     | <i>Desi</i>      | Ca_Desig_Chr04               | 8104376                        | (G/T)       |
| 27713       | CadSNP3308     | <i>Desi</i>      | Ca_Desig_Chr04               | 8104348                        | (G/T)       |
| 27714       | CadSNP3309     | <i>Desi</i>      | Ca_Desig_Chr04               | 8131383                        | (G/T)       |
| 27715       | CadSNP3310     | <i>Desi</i>      | Ca_Desig_Chr04               | 8131392                        | (T/C)       |
| 27716       | CadSNP3311     | <i>Desi</i>      | Ca_Desig_Chr04               | 8131407                        | (C/T)       |
| 27717       | CadSNP3312     | <i>Desi</i>      | Ca_Desig_Chr04               | 8131419                        | (G/T)       |
| 27718       | CadSNP3313     | <i>Desi</i>      | Ca_Desig_Chr04               | 8141345                        | (T/C)       |
| 27719       | CadSNP3314     | <i>Desi</i>      | Ca_Desig_Chr04               | 8150669                        | (A/G)       |
| 27720       | CadSNP3315     | <i>Desi</i>      | Ca_Desig_Chr04               | 8155204                        | (T/C)       |
| 27721       | CadSNP3316     | <i>Desi</i>      | Ca_Desig_Chr04               | 8155339                        | (G/T)       |
| 27722       | CadSNP3317     | <i>Desi</i>      | Ca_Desig_Chr04               | 8155324                        | (G/A)       |
| 27723       | CadSNP3318     | <i>Desi</i>      | Ca_Desig_Chr04               | 8251863                        | (A/G)       |
| 27724       | CadSNP3319     | <i>Desi</i>      | Ca_Desig_Chr04               | 8296526                        | (T/A)       |
| 27725       | CadSNP3320     | <i>Desi</i>      | Ca_Desig_Chr04               | 8313944                        | (A/C)       |
| 27726       | CadSNP3321     | <i>Desi</i>      | Ca_Desig_Chr04               | 8314012                        | (T/C)       |
| 27727       | CadSNP3322     | <i>Desi</i>      | Ca_Desig_Chr04               | 8314163                        | (G/A)       |
| 27728       | CadSNP3323     | <i>Desi</i>      | Ca_Desig_Chr04               | 8413892                        | (A/T)       |
| 27729       | CadSNP3324     | <i>Desi</i>      | Ca_Desig_Chr04               | 8413986                        | (A/T)       |
| 27730       | CadSNP3325     | <i>Desi</i>      | Ca_Desig_Chr04               | 8436236                        | (T/C)       |
| 27731       | CadSNP3326     | <i>Desi</i>      | Ca_Desig_Chr04               | 8436247                        | (T/A)       |
| 27732       | CadSNP3327     | <i>Desi</i>      | Ca_Desig_Chr04               | 8450693                        | (T/G)       |
| 27733       | CadSNP3328     | <i>Desi</i>      | Ca_Desig_Chr04               | 8450676                        | (G/A)       |
| 27734       | CadSNP3329     | <i>Desi</i>      | Ca_Desig_Chr04               | 8875920                        | (T/G)       |
| 27735       | CadSNP3330     | <i>Desi</i>      | Ca_Desig_Chr04               | 8876149                        | (A/G)       |
| 27736       | CadSNP3331     | <i>Desi</i>      | Ca_Desig_Chr04               | 8884501                        | (A/T)       |
| 27737       | CadSNP3332     | <i>Desi</i>      | Ca_Desig_Chr04               | 8884795                        | (T/G)       |
| 27738       | CadSNP3333     | <i>Desi</i>      | Ca_Desig_Chr04               | 8908491                        | (T/A)       |
| 27739       | CadSNP3334     | <i>Desi</i>      | Ca_Desig_Chr04               | 9006140                        | (G/T)       |

| <b>S.N.</b> | <b>SNP IDs</b> | <b>Cultivars</b> | <b>Chromosomes/scaffolds</b> | <b>Physical positions (bp)</b> | <b>SNPs</b> |
|-------------|----------------|------------------|------------------------------|--------------------------------|-------------|
| 27740       | CadSNP3335     | <i>Desi</i>      | Ca_Desig_Chr04               | 9007157                        | (A/G)       |
| 27741       | CadSNP3336     | <i>Desi</i>      | Ca_Desig_Chr04               | 9098812                        | (T/C)       |
| 27742       | CadSNP3337     | <i>Desi</i>      | Ca_Desig_Chr04               | 9098866                        | (A/G)       |
| 27743       | CadSNP3338     | <i>Desi</i>      | Ca_Desig_Chr04               | 9109135                        | (C/T)       |
| 27744       | CadSNP3339     | <i>Desi</i>      | Ca_Desig_Chr04               | 9109128                        | (C/T)       |
| 27745       | CadSNP3340     | <i>Desi</i>      | Ca_Desig_Chr04               | 9153019                        | (G/T)       |
| 27746       | CadSNP3341     | <i>Desi</i>      | Ca_Desig_Chr04               | 9152979                        | (T/C)       |
| 27747       | CadSNP3342     | <i>Desi</i>      | Ca_Desig_Chr04               | 9158606                        | (T/C)       |
| 27748       | CadSNP3343     | <i>Desi</i>      | Ca_Desig_Chr04               | 9158587                        | (C/T)       |
| 27749       | CadSNP3344     | <i>Desi</i>      | Ca_Desig_Chr04               | 9172047                        | (C/G)       |
| 27750       | CadSNP3345     | <i>Desi</i>      | Ca_Desig_Chr04               | 9179853                        | (A/C)       |
| 27751       | CadSNP3346     | <i>Desi</i>      | Ca_Desig_Chr04               | 9187933                        | (T/A)       |
| 27752       | CadSNP3347     | <i>Desi</i>      | Ca_Desig_Chr04               | 9187876                        | (A/C)       |
| 27753       | CadSNP3348     | <i>Desi</i>      | Ca_Desig_Chr04               | 9187868                        | (A/G)       |
| 27754       | CadSNP3349     | <i>Desi</i>      | Ca_Desig_Chr04               | 9188480                        | (G/A)       |
| 27755       | CadSNP3350     | <i>Desi</i>      | Ca_Desig_Chr04               | 9188502                        | (A/G)       |
| 27756       | CadSNP3351     | <i>Desi</i>      | Ca_Desig_Chr04               | 9205484                        | (A/G)       |
| 27757       | CadSNP3352     | <i>Desi</i>      | Ca_Desig_Chr04               | 9208810                        | (C/T)       |
| 27758       | CadSNP3353     | <i>Desi</i>      | Ca_Desig_Chr04               | 9222526                        | (C/T)       |
| 27759       | CadSNP3354     | <i>Desi</i>      | Ca_Desig_Chr04               | 9222554                        | (T/A)       |
| 27760       | CadSNP3355     | <i>Desi</i>      | Ca_Desig_Chr04               | 9224339                        | (A/G)       |
| 27761       | CadSNP3356     | <i>Desi</i>      | Ca_Desig_Chr04               | 9224369                        | (A/G)       |
| 27762       | CadSNP3357     | <i>Desi</i>      | Ca_Desig_Chr04               | 9224381                        | (G/A)       |
| 27763       | CadSNP3358     | <i>Desi</i>      | Ca_Desig_Chr04               | 9224405                        | (C/G)       |
| 27764       | CadSNP3359     | <i>Desi</i>      | Ca_Desig_Chr04               | 9224420                        | (C/T)       |
| 27765       | CadSNP3360     | <i>Desi</i>      | Ca_Desig_Chr04               | 9224520                        | (A/G)       |
| 27766       | CadSNP3361     | <i>Desi</i>      | Ca_Desig_Chr04               | 9224646                        | (C/T)       |
| 27767       | CadSNP3362     | <i>Desi</i>      | Ca_Desig_Chr04               | 9224613                        | (C/A)       |
| 27768       | CadSNP3363     | <i>Desi</i>      | Ca_Desig_Chr04               | 9224592                        | (T/G)       |
| 27769       | CadSNP3364     | <i>Desi</i>      | Ca_Desig_Chr04               | 9225522                        | (C/A)       |
| 27770       | CadSNP3365     | <i>Desi</i>      | Ca_Desig_Chr04               | 9225697                        | (T/C)       |
| 27771       | CadSNP3366     | <i>Desi</i>      | Ca_Desig_Chr04               | 9296293                        | (T/G)       |
| 27772       | CadSNP3367     | <i>Desi</i>      | Ca_Desig_Chr04               | 9345307                        | (A/G)       |
| 27773       | CadSNP3368     | <i>Desi</i>      | Ca_Desig_Chr04               | 9345752                        | (T/A)       |
| 27774       | CadSNP3369     | <i>Desi</i>      | Ca_Desig_Chr04               | 9347802                        | (A/G)       |
| 27775       | CadSNP3370     | <i>Desi</i>      | Ca_Desig_Chr04               | 9385964                        | (G/A)       |
| 27776       | CadSNP3371     | <i>Desi</i>      | Ca_Desig_Chr04               | 9432561                        | (T/C)       |
| 27777       | CadSNP3372     | <i>Desi</i>      | Ca_Desig_Chr04               | 9471392                        | (G/A)       |

| <b>S.N.</b> | <b>SNP IDs</b> | <b>Cultivars</b> | <b>Chromosomes/scaffolds</b> | <b>Physical positions (bp)</b> | <b>SNPs</b> |
|-------------|----------------|------------------|------------------------------|--------------------------------|-------------|
| 27778       | CadSNP3373     | <i>Desi</i>      | Ca_Desig_Chr04               | 9480757                        | (T/C)       |
| 27779       | CadSNP3374     | <i>Desi</i>      | Ca_Desig_Chr04               | 9480764                        | (A/T)       |
| 27780       | CadSNP3375     | <i>Desi</i>      | Ca_Desig_Chr04               | 9480774                        | (C/T)       |
| 27781       | CadSNP3376     | <i>Desi</i>      | Ca_Desig_Chr04               | 9480890                        | (T/G)       |
| 27782       | CadSNP3377     | <i>Desi</i>      | Ca_Desig_Chr04               | 9494492                        | (T/G)       |
| 27783       | CadSNP3378     | <i>Desi</i>      | Ca_Desig_Chr04               | 9494632                        | (C/G)       |
| 27784       | CadSNP3379     | <i>Desi</i>      | Ca_Desig_Chr04               | 9504450                        | (T/G)       |
| 27785       | CadSNP3380     | <i>Desi</i>      | Ca_Desig_Chr04               | 9513671                        | (T/G)       |
| 27786       | CadSNP3381     | <i>Desi</i>      | Ca_Desig_Chr04               | 9513733                        | (T/C)       |
| 27787       | CadSNP3382     | <i>Desi</i>      | Ca_Desig_Chr04               | 9532292                        | (G/A)       |
| 27788       | CadSNP3383     | <i>Desi</i>      | Ca_Desig_Chr04               | 9540199                        | (G/A)       |
| 27789       | CadSNP3384     | <i>Desi</i>      | Ca_Desig_Chr04               | 9540235                        | (T/C)       |
| 27790       | CadSNP3385     | <i>Desi</i>      | Ca_Desig_Chr04               | 9546623                        | (C/T)       |
| 27791       | CadSNP3386     | <i>Desi</i>      | Ca_Desig_Chr04               | 9546624                        | (T/C)       |
| 27792       | CadSNP3387     | <i>Desi</i>      | Ca_Desig_Chr04               | 9561852                        | (T/G)       |
| 27793       | CadSNP3388     | <i>Desi</i>      | Ca_Desig_Chr04               | 9585248                        | (G/T)       |
| 27794       | CadSNP3389     | <i>Desi</i>      | Ca_Desig_Chr04               | 9594060                        | (T/G)       |
| 27795       | CadSNP3390     | <i>Desi</i>      | Ca_Desig_Chr04               | 9621755                        | (G/A)       |
| 27796       | CadSNP3391     | <i>Desi</i>      | Ca_Desig_Chr04               | 9621758                        | (G/A)       |
| 27797       | CadSNP3392     | <i>Desi</i>      | Ca_Desig_Chr04               | 9621769                        | (C/T)       |
| 27798       | CadSNP3393     | <i>Desi</i>      | Ca_Desig_Chr04               | 9621770                        | (G/A)       |
| 27799       | CadSNP3394     | <i>Desi</i>      | Ca_Desig_Chr04               | 9621810                        | (G/T)       |
| 27800       | CadSNP3395     | <i>Desi</i>      | Ca_Desig_Chr04               | 9637332                        | (T/C)       |
| 27801       | CadSNP3396     | <i>Desi</i>      | Ca_Desig_Chr04               | 9662593                        | (T/C)       |
| 27802       | CadSNP3397     | <i>Desi</i>      | Ca_Desig_Chr04               | 9713866                        | (C/T)       |
| 27803       | CadSNP3398     | <i>Desi</i>      | Ca_Desig_Chr04               | 9742719                        | (C/T)       |
| 27804       | CadSNP3399     | <i>Desi</i>      | Ca_Desig_Chr04               | 9747972                        | (G/C)       |
| 27805       | CadSNP3400     | <i>Desi</i>      | Ca_Desig_Chr04               | 9748039                        | (T/G)       |
| 27806       | CadSNP3401     | <i>Desi</i>      | Ca_Desig_Chr04               | 9773879                        | (A/G)       |
| 27807       | CadSNP3402     | <i>Desi</i>      | Ca_Desig_Chr04               | 9793407                        | (T/C)       |
| 27808       | CadSNP3403     | <i>Desi</i>      | Ca_Desig_Chr04               | 9793409                        | (C/A)       |
| 27809       | CadSNP3404     | <i>Desi</i>      | Ca_Desig_Chr04               | 9793410                        | (T/G)       |
| 27810       | CadSNP3405     | <i>Desi</i>      | Ca_Desig_Chr04               | 9793430                        | (A/G)       |
| 27811       | CadSNP3406     | <i>Desi</i>      | Ca_Desig_Chr04               | 9851330                        | (A/T)       |
| 27812       | CadSNP3407     | <i>Desi</i>      | Ca_Desig_Chr04               | 9851366                        | (T/G)       |
| 27813       | CadSNP3408     | <i>Desi</i>      | Ca_Desig_Chr04               | 9851424                        | (T/A)       |
| 27814       | CadSNP3409     | <i>Desi</i>      | Ca_Desig_Chr04               | 9855603                        | (T/C)       |
| 27815       | CadSNP3410     | <i>Desi</i>      | Ca_Desig_Chr04               | 9855664                        | (C/A)       |

| <b>S.N.</b> | <b>SNP IDs</b> | <b>Cultivars</b> | <b>Chromosomes/scaffolds</b> | <b>Physical positions (bp)</b> | <b>SNPs</b> |
|-------------|----------------|------------------|------------------------------|--------------------------------|-------------|
| 27816       | CadSNP3411     | <i>Desi</i>      | Ca_Desig_Chr04               | 9856520                        | (A/G)       |
| 27817       | CadSNP3412     | <i>Desi</i>      | Ca_Desig_Chr04               | 9856753                        | (T/C)       |
| 27818       | CadSNP3413     | <i>Desi</i>      | Ca_Desig_Chr04               | 9856777                        | (G/T)       |
| 27819       | CadSNP3414     | <i>Desi</i>      | Ca_Desig_Chr04               | 9856813                        | (A/T)       |
| 27820       | CadSNP3415     | <i>Desi</i>      | Ca_Desig_Chr04               | 9857710                        | (T/C)       |
| 27821       | CadSNP3416     | <i>Desi</i>      | Ca_Desig_Chr04               | 9857716                        | (C/T)       |
| 27822       | CadSNP3417     | <i>Desi</i>      | Ca_Desig_Chr04               | 9858208                        | (T/C)       |
| 27823       | CadSNP3418     | <i>Desi</i>      | Ca_Desig_Chr04               | 9858763                        | (C/A)       |
| 27824       | CadSNP3419     | <i>Desi</i>      | Ca_Desig_Chr04               | 9873306                        | (A/G)       |
| 27825       | CadSNP3420     | <i>Desi</i>      | Ca_Desig_Chr04               | 9873329                        | (C/A)       |
| 27826       | CadSNP3421     | <i>Desi</i>      | Ca_Desig_Chr04               | 9873334                        | (A/T)       |
| 27827       | CadSNP3422     | <i>Desi</i>      | Ca_Desig_Chr04               | 10003288                       | (T/C)       |
| 27828       | CadSNP3423     | <i>Desi</i>      | Ca_Desig_Chr04               | 10034782                       | (G/A)       |
| 27829       | CadSNP3424     | <i>Desi</i>      | Ca_Desig_Chr04               | 10162763                       | (A/C)       |
| 27830       | CadSNP3425     | <i>Desi</i>      | Ca_Desig_Chr04               | 10162777                       | (G/A)       |
| 27831       | CadSNP3426     | <i>Desi</i>      | Ca_Desig_Chr04               | 10237119                       | (G/C)       |
| 27832       | CadSNP3427     | <i>Desi</i>      | Ca_Desig_Chr04               | 10249253                       | (C/T)       |
| 27833       | CadSNP3428     | <i>Desi</i>      | Ca_Desig_Chr04               | 10249225                       | (T/C)       |
| 27834       | CadSNP3429     | <i>Desi</i>      | Ca_Desig_Chr04               | 10297272                       | (T/C)       |
| 27835       | CadSNP3430     | <i>Desi</i>      | Ca_Desig_Chr04               | 10297329                       | (C/T)       |
| 27836       | CadSNP3431     | <i>Desi</i>      | Ca_Desig_Chr04               | 10339397                       | (G/A)       |
| 27837       | CadSNP3432     | <i>Desi</i>      | Ca_Desig_Chr04               | 10365321                       | (G/T)       |
| 27838       | CadSNP3433     | <i>Desi</i>      | Ca_Desig_Chr04               | 10365308                       | (G/C)       |
| 27839       | CadSNP3434     | <i>Desi</i>      | Ca_Desig_Chr04               | 10376604                       | (G/C)       |
| 27840       | CadSNP3435     | <i>Desi</i>      | Ca_Desig_Chr04               | 10563760                       | (C/T)       |
| 27841       | CadSNP3436     | <i>Desi</i>      | Ca_Desig_Chr04               | 10563793                       | (G/C)       |
| 27842       | CadSNP3437     | <i>Desi</i>      | Ca_Desig_Chr04               | 10563835                       | (T/C)       |
| 27843       | CadSNP3438     | <i>Desi</i>      | Ca_Desig_Chr04               | 10613225                       | (A/G)       |
| 27844       | CadSNP3439     | <i>Desi</i>      | Ca_Desig_Chr04               | 10613246                       | (T/G)       |
| 27845       | CadSNP3440     | <i>Desi</i>      | Ca_Desig_Chr04               | 10652669                       | (A/C)       |
| 27846       | CadSNP3441     | <i>Desi</i>      | Ca_Desig_Chr04               | 10653797                       | (C/T)       |
| 27847       | CadSNP3442     | <i>Desi</i>      | Ca_Desig_Chr04               | 10675156                       | (T/C)       |
| 27848       | CadSNP3443     | <i>Desi</i>      | Ca_Desig_Chr04               | 10675154                       | (C/G)       |
| 27849       | CadSNP3444     | <i>Desi</i>      | Ca_Desig_Chr04               | 10675085                       | (C/T)       |
| 27850       | CadSNP3445     | <i>Desi</i>      | Ca_Desig_Chr04               | 10679808                       | (G/A)       |
| 27851       | CadSNP3446     | <i>Desi</i>      | Ca_Desig_Chr04               | 10679809                       | (G/A)       |
| 27852       | CadSNP3447     | <i>Desi</i>      | Ca_Desig_Chr04               | 10735618                       | (C/T)       |
| 27853       | CadSNP3448     | <i>Desi</i>      | Ca_Desig_Chr04               | 10735644                       | (C/T)       |

| <b>S.N.</b> | <b>SNP IDs</b> | <b>Cultivars</b> | <b>Chromosomes/scaffolds</b> | <b>Physical positions (bp)</b> | <b>SNPs</b> |
|-------------|----------------|------------------|------------------------------|--------------------------------|-------------|
| 27854       | CadSNP3449     | <i>Desi</i>      | Ca_Desig_Chr04               | 10774368                       | (C/A)       |
| 27855       | CadSNP3450     | <i>Desi</i>      | Ca_Desig_Chr04               | 10774538                       | (C/T)       |
| 27856       | CadSNP3451     | <i>Desi</i>      | Ca_Desig_Chr04               | 10777966                       | (A/G)       |
| 27857       | CadSNP3452     | <i>Desi</i>      | Ca_Desig_Chr04               | 10777980                       | (T/C)       |
| 27858       | CadSNP3453     | <i>Desi</i>      | Ca_Desig_Chr04               | 10777994                       | (G/C)       |
| 27859       | CadSNP3454     | <i>Desi</i>      | Ca_Desig_Chr04               | 10778121                       | (G/A)       |
| 27860       | CadSNP3455     | <i>Desi</i>      | Ca_Desig_Chr04               | 10840349                       | (C/A)       |
| 27861       | CadSNP3456     | <i>Desi</i>      | Ca_Desig_Chr04               | 10848826                       | (G/A)       |
| 27862       | CadSNP3457     | <i>Desi</i>      | Ca_Desig_Chr04               | 10931914                       | (C/T)       |
| 27863       | CadSNP3458     | <i>Desi</i>      | Ca_Desig_Chr04               | 10946181                       | (A/G)       |
| 27864       | CadSNP3459     | <i>Desi</i>      | Ca_Desig_Chr04               | 11013040                       | (G/C)       |
| 27865       | CadSNP3460     | <i>Desi</i>      | Ca_Desig_Chr04               | 11072174                       | (G/A)       |
| 27866       | CadSNP3461     | <i>Desi</i>      | Ca_Desig_Chr04               | 11072150                       | (C/T)       |
| 27867       | CadSNP3462     | <i>Desi</i>      | Ca_Desig_Chr04               | 11089813                       | (A/T)       |
| 27868       | CadSNP3463     | <i>Desi</i>      | Ca_Desig_Chr04               | 11089940                       | (C/T)       |
| 27869       | CadSNP3464     | <i>Desi</i>      | Ca_Desig_Chr04               | 11089936                       | (A/C)       |
| 27870       | CadSNP3465     | <i>Desi</i>      | Ca_Desig_Chr04               | 11108907                       | (A/T)       |
| 27871       | CadSNP3466     | <i>Desi</i>      | Ca_Desig_Chr04               | 11108985                       | (G/A)       |
| 27872       | CadSNP3467     | <i>Desi</i>      | Ca_Desig_Chr04               | 11141025                       | (A/G)       |
| 27873       | CadSNP3468     | <i>Desi</i>      | Ca_Desig_Chr04               | 11151839                       | (G/A)       |
| 27874       | CadSNP3469     | <i>Desi</i>      | Ca_Desig_Chr04               | 11228779                       | (G/A)       |
| 27875       | CadSNP3470     | <i>Desi</i>      | Ca_Desig_Chr04               | 11299550                       | (T/A)       |
| 27876       | CadSNP3471     | <i>Desi</i>      | Ca_Desig_Chr04               | 11328592                       | (G/T)       |
| 27877       | CadSNP3472     | <i>Desi</i>      | Ca_Desig_Chr04               | 11387866                       | (C/T)       |
| 27878       | CadSNP3473     | <i>Desi</i>      | Ca_Desig_Chr04               | 11399103                       | (C/T)       |
| 27879       | CadSNP3474     | <i>Desi</i>      | Ca_Desig_Chr04               | 11407181                       | (T/G)       |
| 27880       | CadSNP3475     | <i>Desi</i>      | Ca_Desig_Chr04               | 11407191                       | (T/G)       |
| 27881       | CadSNP3476     | <i>Desi</i>      | Ca_Desig_Chr04               | 11407349                       | (G/A)       |
| 27882       | CadSNP3477     | <i>Desi</i>      | Ca_Desig_Chr04               | 11407317                       | (T/C)       |
| 27883       | CadSNP3478     | <i>Desi</i>      | Ca_Desig_Chr04               | 11444490                       | (A/G)       |
| 27884       | CadSNP3479     | <i>Desi</i>      | Ca_Desig_Chr04               | 11444591                       | (A/G)       |
| 27885       | CadSNP3480     | <i>Desi</i>      | Ca_Desig_Chr04               | 11444656                       | (G/A)       |
| 27886       | CadSNP3481     | <i>Desi</i>      | Ca_Desig_Chr04               | 11459017                       | (A/C)       |
| 27887       | CadSNP3482     | <i>Desi</i>      | Ca_Desig_Chr04               | 11459978                       | (T/C)       |
| 27888       | CadSNP3483     | <i>Desi</i>      | Ca_Desig_Chr04               | 11491003                       | (A/G)       |
| 27889       | CadSNP3484     | <i>Desi</i>      | Ca_Desig_Chr04               | 11491028                       | (C/T)       |
| 27890       | CadSNP3485     | <i>Desi</i>      | Ca_Desig_Chr04               | 11538965                       | (C/G)       |
| 27891       | CadSNP3486     | <i>Desi</i>      | Ca_Desig_Chr04               | 11539242                       | (C/T)       |



| <b>S.N.</b> | <b>SNP IDs</b> | <b>Cultivars</b> | <b>Chromosomes/scaffolds</b> | <b>Physical positions (bp)</b> | <b>SNPs</b> |
|-------------|----------------|------------------|------------------------------|--------------------------------|-------------|
| 27892       | CadSNP3487     | <i>Desi</i>      | Ca_Desig_Chr04               | 11539401                       | (T/C)       |
| 27893       | CadSNP3488     | <i>Desi</i>      | Ca_Desig_Chr04               | 11540055                       | (A/G)       |
| 27894       | CadSNP3489     | <i>Desi</i>      | Ca_Desig_Chr04               | 11540126                       | (G/C)       |
| 27895       | CadSNP3490     | <i>Desi</i>      | Ca_Desig_Chr04               | 11541368                       | (A/G)       |
| 27896       | CadSNP3491     | <i>Desi</i>      | Ca_Desig_Chr04               | 11542258                       | (A/G)       |
| 27897       | CadSNP3492     | <i>Desi</i>      | Ca_Desig_Chr04               | 11543134                       | (T/A)       |
| 27898       | CadSNP3493     | <i>Desi</i>      | Ca_Desig_Chr04               | 11543211                       | (G/A)       |
| 27899       | CadSNP3494     | <i>Desi</i>      | Ca_Desig_Chr04               | 11570353                       | (G/A)       |
| 27900       | CadSNP3495     | <i>Desi</i>      | Ca_Desig_Chr04               | 11570362                       | (C/T)       |
| 27901       | CadSNP3496     | <i>Desi</i>      | Ca_Desig_Chr04               | 11570433                       | (C/T)       |
| 27902       | CadSNP3497     | <i>Desi</i>      | Ca_Desig_Chr04               | 11572131                       | (C/A)       |
| 27903       | CadSNP3498     | <i>Desi</i>      | Ca_Desig_Chr04               | 11572192                       | (A/C)       |
| 27904       | CadSNP3499     | <i>Desi</i>      | Ca_Desig_Chr04               | 11585312                       | (G/A)       |
| 27905       | CadSNP3500     | <i>Desi</i>      | Ca_Desig_Chr04               | 11585310                       | (T/C)       |
| 27906       | CadSNP3501     | <i>Desi</i>      | Ca_Desig_Chr04               | 11585305                       | (T/C)       |
| 27907       | CadSNP3502     | <i>Desi</i>      | Ca_Desig_Chr04               | 11586043                       | (A/C)       |
| 27908       | CadSNP3503     | <i>Desi</i>      | Ca_Desig_Chr04               | 11586046                       | (T/A)       |
| 27909       | CadSNP3504     | <i>Desi</i>      | Ca_Desig_Chr04               | 11586049                       | (G/C)       |
| 27910       | CadSNP3505     | <i>Desi</i>      | Ca_Desig_Chr04               | 11618929                       | (A/C)       |
| 27911       | CadSNP3506     | <i>Desi</i>      | Ca_Desig_Chr04               | 11655818                       | (G/A)       |
| 27912       | CadSNP3507     | <i>Desi</i>      | Ca_Desig_Chr04               | 11666148                       | (A/T)       |
| 27913       | CadSNP3508     | <i>Desi</i>      | Ca_Desig_Chr04               | 11666475                       | (C/A)       |
| 27914       | CadSNP3509     | <i>Desi</i>      | Ca_Desig_Chr04               | 11674624                       | (A/C)       |
| 27915       | CadSNP3510     | <i>Desi</i>      | Ca_Desig_Chr04               | 11674619                       | (A/C)       |
| 27916       | CadSNP3511     | <i>Desi</i>      | Ca_Desig_Chr04               | 11674615                       | (C/A)       |
| 27917       | CadSNP3512     | <i>Desi</i>      | Ca_Desig_Chr04               | 11674605                       | (G/A)       |
| 27918       | CadSNP3513     | <i>Desi</i>      | Ca_Desig_Chr04               | 11674597                       | (A/C)       |
| 27919       | CadSNP3514     | <i>Desi</i>      | Ca_Desig_Chr04               | 11674590                       | (T/C)       |
| 27920       | CadSNP3515     | <i>Desi</i>      | Ca_Desig_Chr04               | 11674576                       | (A/T)       |
| 27921       | CadSNP3516     | <i>Desi</i>      | Ca_Desig_Chr04               | 11704367                       | (T/G)       |
| 27922       | CadSNP3517     | <i>Desi</i>      | Ca_Desig_Chr04               | 11704768                       | (T/C)       |
| 27923       | CadSNP3518     | <i>Desi</i>      | Ca_Desig_Chr04               | 11784887                       | (G/A)       |
| 27924       | CadSNP3519     | <i>Desi</i>      | Ca_Desig_Chr04               | 11784873                       | (T/C)       |
| 27925       | CadSNP3520     | <i>Desi</i>      | Ca_Desig_Chr04               | 11985023                       | (T/C)       |
| 27926       | CadSNP3521     | <i>Desi</i>      | Ca_Desig_Chr04               | 11984982                       | (C/T)       |
| 27927       | CadSNP3522     | <i>Desi</i>      | Ca_Desig_Chr04               | 11995878                       | (T/C)       |
| 27928       | CadSNP3523     | <i>Desi</i>      | Ca_Desig_Chr04               | 11997055                       | (A/G)       |
| 27929       | CadSNP3524     | <i>Desi</i>      | Ca_Desig_Chr04               | 11997017                       | (G/C)       |

| <b>S.N.</b> | <b>SNP IDs</b> | <b>Cultivars</b> | <b>Chromosomes/scaffolds</b> | <b>Physical positions (bp)</b> | <b>SNPs</b> |
|-------------|----------------|------------------|------------------------------|--------------------------------|-------------|
| 27930       | CadSNP3525     | <i>Desi</i>      | Ca_Desig_Chr04               | 11999317                       | (C/A)       |
| 27931       | CadSNP3526     | <i>Desi</i>      | Ca_Desig_Chr04               | 12039170                       | (A/G)       |
| 27932       | CadSNP3527     | <i>Desi</i>      | Ca_Desig_Chr04               | 12096227                       | (C/T)       |
| 27933       | CadSNP3528     | <i>Desi</i>      | Ca_Desig_Chr04               | 12097965                       | (T/C)       |
| 27934       | CadSNP3529     | <i>Desi</i>      | Ca_Desig_Chr04               | 12119441                       | (T/A)       |
| 27935       | CadSNP3530     | <i>Desi</i>      | Ca_Desig_Chr04               | 12119463                       | (A/G)       |
| 27936       | CadSNP3531     | <i>Desi</i>      | Ca_Desig_Chr04               | 12119500                       | (T/C)       |
| 27937       | CadSNP3532     | <i>Desi</i>      | Ca_Desig_Chr04               | 12119513                       | (T/A)       |
| 27938       | CadSNP3533     | <i>Desi</i>      | Ca_Desig_Chr04               | 12130950                       | (G/T)       |
| 27939       | CadSNP3534     | <i>Desi</i>      | Ca_Desig_Chr04               | 12135151                       | (C/A)       |
| 27940       | CadSNP3535     | <i>Desi</i>      | Ca_Desig_Chr04               | 12135294                       | (A/C)       |
| 27941       | CadSNP3536     | <i>Desi</i>      | Ca_Desig_Chr04               | 12140662                       | (T/A)       |
| 27942       | CadSNP3537     | <i>Desi</i>      | Ca_Desig_Chr04               | 12269598                       | (C/G)       |
| 27943       | CadSNP3538     | <i>Desi</i>      | Ca_Desig_Chr04               | 12271908                       | (C/T)       |
| 27944       | CadSNP3539     | <i>Desi</i>      | Ca_Desig_Chr04               | 12298911                       | (A/G)       |
| 27945       | CadSNP3540     | <i>Desi</i>      | Ca_Desig_Chr04               | 12298993                       | (C/T)       |
| 27946       | CadSNP3541     | <i>Desi</i>      | Ca_Desig_Chr04               | 12299035                       | (T/A)       |
| 27947       | CadSNP3542     | <i>Desi</i>      | Ca_Desig_Chr04               | 12299174                       | (T/C)       |
| 27948       | CadSNP3543     | <i>Desi</i>      | Ca_Desig_Chr04               | 12299128                       | (C/T)       |
| 27949       | CadSNP3544     | <i>Desi</i>      | Ca_Desig_Chr04               | 12299214                       | (C/A)       |
| 27950       | CadSNP3545     | <i>Desi</i>      | Ca_Desig_Chr04               | 12301681                       | (G/A)       |
| 27951       | CadSNP3546     | <i>Desi</i>      | Ca_Desig_Chr04               | 12304961                       | (G/A)       |
| 27952       | CadSNP3547     | <i>Desi</i>      | Ca_Desig_Chr04               | 12304989                       | (G/T)       |
| 27953       | CadSNP3548     | <i>Desi</i>      | Ca_Desig_Chr04               | 12309308                       | (A/C)       |
| 27954       | CadSNP3549     | <i>Desi</i>      | Ca_Desig_Chr04               | 12315934                       | (G/A)       |
| 27955       | CadSNP3550     | <i>Desi</i>      | Ca_Desig_Chr04               | 12321545                       | (A/G)       |
| 27956       | CadSNP3551     | <i>Desi</i>      | Ca_Desig_Chr04               | 12384834                       | (T/C)       |
| 27957       | CadSNP3552     | <i>Desi</i>      | Ca_Desig_Chr04               | 12413541                       | (A/T)       |
| 27958       | CadSNP3553     | <i>Desi</i>      | Ca_Desig_Chr04               | 12415544                       | (A/C)       |
| 27959       | CadSNP3554     | <i>Desi</i>      | Ca_Desig_Chr04               | 12415630                       | (C/G)       |
| 27960       | CadSNP3555     | <i>Desi</i>      | Ca_Desig_Chr04               | 12528593                       | (A/C)       |
| 27961       | CadSNP3556     | <i>Desi</i>      | Ca_Desig_Chr04               | 12528566                       | (A/T)       |
| 27962       | CadSNP3557     | <i>Desi</i>      | Ca_Desig_Chr04               | 12528565                       | (T/G)       |
| 27963       | CadSNP3558     | <i>Desi</i>      | Ca_Desig_Chr04               | 12564742                       | (A/G)       |
| 27964       | CadSNP3559     | <i>Desi</i>      | Ca_Desig_Chr04               | 12564773                       | (A/C)       |
| 27965       | CadSNP3560     | <i>Desi</i>      | Ca_Desig_Chr04               | 12564866                       | (C/A)       |
| 27966       | CadSNP3561     | <i>Desi</i>      | Ca_Desig_Chr04               | 12564855                       | (C/A)       |
| 27967       | CadSNP3562     | <i>Desi</i>      | Ca_Desig_Chr04               | 12564957                       | (G/A)       |

| <b>S.N.</b> | <b>SNP IDs</b> | <b>Cultivars</b> | <b>Chromosomes/scaffolds</b> | <b>Physical positions (bp)</b> | <b>SNPs</b> |
|-------------|----------------|------------------|------------------------------|--------------------------------|-------------|
| 27968       | CadSNP3563     | <i>Desi</i>      | Ca_Desig_Chr04               | 12574174                       | (C/T)       |
| 27969       | CadSNP3564     | <i>Desi</i>      | Ca_Desig_Chr04               | 12629545                       | (C/T)       |
| 27970       | CadSNP3565     | <i>Desi</i>      | Ca_Desig_Chr04               | 12662794                       | (A/C)       |
| 27971       | CadSNP3566     | <i>Desi</i>      | Ca_Desig_Chr04               | 12662792                       | (A/T)       |
| 27972       | CadSNP3567     | <i>Desi</i>      | Ca_Desig_Chr04               | 12663614                       | (T/A)       |
| 27973       | CadSNP3568     | <i>Desi</i>      | Ca_Desig_Chr04               | 12663616                       | (A/G)       |
| 27974       | CadSNP3569     | <i>Desi</i>      | Ca_Desig_Chr04               | 12663750                       | (G/T)       |
| 27975       | CadSNP3570     | <i>Desi</i>      | Ca_Desig_Chr04               | 12663740                       | (C/T)       |
| 27976       | CadSNP3571     | <i>Desi</i>      | Ca_Desig_Chr04               | 12663732                       | (C/A)       |
| 27977       | CadSNP3572     | <i>Desi</i>      | Ca_Desig_Chr04               | 12713249                       | (T/C)       |
| 27978       | CadSNP3573     | <i>Desi</i>      | Ca_Desig_Chr04               | 12713219                       | (A/C)       |
| 27979       | CadSNP3574     | <i>Desi</i>      | Ca_Desig_Chr04               | 12752895                       | (T/A)       |
| 27980       | CadSNP3575     | <i>Desi</i>      | Ca_Desig_Chr04               | 12791262                       | (A/C)       |
| 27981       | CadSNP3576     | <i>Desi</i>      | Ca_Desig_Chr04               | 12814460                       | (A/C)       |
| 27982       | CadSNP3577     | <i>Desi</i>      | Ca_Desig_Chr04               | 12814458                       | (C/A)       |
| 27983       | CadSNP3578     | <i>Desi</i>      | Ca_Desig_Chr04               | 12814456                       | (T/G)       |
| 27984       | CadSNP3579     | <i>Desi</i>      | Ca_Desig_Chr04               | 12814386                       | (G/T)       |
| 27985       | CadSNP3580     | <i>Desi</i>      | Ca_Desig_Chr04               | 12848886                       | (T/C)       |
| 27986       | CadSNP3581     | <i>Desi</i>      | Ca_Desig_Chr04               | 12848914                       | (C/T)       |
| 27987       | CadSNP3582     | <i>Desi</i>      | Ca_Desig_Chr04               | 12848968                       | (T/A)       |
| 27988       | CadSNP3583     | <i>Desi</i>      | Ca_Desig_Chr04               | 12915127                       | (G/A)       |
| 27989       | CadSNP3584     | <i>Desi</i>      | Ca_Desig_Chr04               | 12991328                       | (C/T)       |
| 27990       | CadSNP3585     | <i>Desi</i>      | Ca_Desig_Chr04               | 12991368                       | (C/T)       |
| 27991       | CadSNP3586     | <i>Desi</i>      | Ca_Desig_Chr04               | 15802555                       | (G/A)       |
| 27992       | CadSNP3587     | <i>Desi</i>      | Ca_Desig_Chr04               | 15802546                       | (A/C)       |
| 27993       | CadSNP3588     | <i>Desi</i>      | Ca_Desig_Chr04               | 15813365                       | (T/G)       |
| 27994       | CadSNP3589     | <i>Desi</i>      | Ca_Desig_Chr04               | 15813383                       | (G/C)       |
| 27995       | CadSNP3590     | <i>Desi</i>      | Ca_Desig_Chr04               | 15867143                       | (C/T)       |
| 27996       | CadSNP3591     | <i>Desi</i>      | Ca_Desig_Chr04               | 15867148                       | (C/T)       |
| 27997       | CadSNP3592     | <i>Desi</i>      | Ca_Desig_Chr04               | 15875005                       | (T/C)       |
| 27998       | CadSNP3593     | <i>Desi</i>      | Ca_Desig_Chr04               | 15874938                       | (T/A)       |
| 27999       | CadSNP3594     | <i>Desi</i>      | Ca_Desig_Chr04               | 15957930                       | (C/A)       |
| 28000       | CadSNP3595     | <i>Desi</i>      | Ca_Desig_Chr04               | 15957928                       | (G/A)       |
| 28001       | CadSNP3596     | <i>Desi</i>      | Ca_Desig_Chr04               | 15957923                       | (C/A)       |
| 28002       | CadSNP3597     | <i>Desi</i>      | Ca_Desig_Chr04               | 15957956                       | (T/G)       |
| 28003       | CadSNP3598     | <i>Desi</i>      | Ca_Desig_Chr04               | 16029782                       | (G/A)       |
| 28004       | CadSNP3599     | <i>Desi</i>      | Ca_Desig_Chr04               | 16033309                       | (T/C)       |
| 28005       | CadSNP3600     | <i>Desi</i>      | Ca_Desig_Chr04               | 16061799                       | (A/T)       |

| <b>S.N.</b> | <b>SNP IDs</b> | <b>Cultivars</b> | <b>Chromosomes/scaffolds</b> | <b>Physical positions (bp)</b> | <b>SNPs</b> |
|-------------|----------------|------------------|------------------------------|--------------------------------|-------------|
| 28006       | CadSNP3601     | <i>Desi</i>      | Ca_Desig_Chr04               | 16061797                       | (A/G)       |
| 28007       | CadSNP3602     | <i>Desi</i>      | Ca_Desig_Chr04               | 16079954                       | (C/G)       |
| 28008       | CadSNP3603     | <i>Desi</i>      | Ca_Desig_Chr04               | 16119549                       | (T/C)       |
| 28009       | CadSNP3604     | <i>Desi</i>      | Ca_Desig_Chr04               | 16140046                       | (A/G)       |
| 28010       | CadSNP3605     | <i>Desi</i>      | Ca_Desig_Chr04               | 16174595                       | (T/G)       |
| 28011       | CadSNP3606     | <i>Desi</i>      | Ca_Desig_Chr04               | 16206440                       | (A/C)       |
| 28012       | CadSNP3607     | <i>Desi</i>      | Ca_Desig_Chr04               | 16206773                       | (C/T)       |
| 28013       | CadSNP3608     | <i>Desi</i>      | Ca_Desig_Chr04               | 16219603                       | (C/A)       |
| 28014       | CadSNP3609     | <i>Desi</i>      | Ca_Desig_Chr04               | 16219684                       | (G/A)       |
| 28015       | CadSNP3610     | <i>Desi</i>      | Ca_Desig_Chr04               | 16283662                       | (A/C)       |
| 28016       | CadSNP3611     | <i>Desi</i>      | Ca_Desig_Chr04               | 16303827                       | (C/T)       |
| 28017       | CadSNP3612     | <i>Desi</i>      | Ca_Desig_Chr04               | 16318820                       | (G/A)       |
| 28018       | CadSNP3613     | <i>Desi</i>      | Ca_Desig_Chr04               | 16318794                       | (C/T)       |
| 28019       | CadSNP3614     | <i>Desi</i>      | Ca_Desig_Chr04               | 16362424                       | (T/G)       |
| 28020       | CadSNP3615     | <i>Desi</i>      | Ca_Desig_Chr04               | 16364589                       | (A/G)       |
| 28021       | CadSNP3616     | <i>Desi</i>      | Ca_Desig_Chr04               | 16420044                       | (A/G)       |
| 28022       | CadSNP3617     | <i>Desi</i>      | Ca_Desig_Chr04               | 16447632                       | (T/C)       |
| 28023       | CadSNP3618     | <i>Desi</i>      | Ca_Desig_Chr04               | 16467205                       | (G/A)       |
| 28024       | CadSNP3619     | <i>Desi</i>      | Ca_Desig_Chr04               | 16467235                       | (C/G)       |
| 28025       | CadSNP3620     | <i>Desi</i>      | Ca_Desig_Chr04               | 16541771                       | (T/C)       |
| 28026       | CadSNP3621     | <i>Desi</i>      | Ca_Desig_Chr04               | 16557321                       | (T/C)       |
| 28027       | CadSNP3622     | <i>Desi</i>      | Ca_Desig_Chr04               | 16557315                       | (C/G)       |
| 28028       | CadSNP3623     | <i>Desi</i>      | Ca_Desig_Chr04               | 16565082                       | (G/A)       |
| 28029       | CadSNP3624     | <i>Desi</i>      | Ca_Desig_Chr04               | 16568515                       | (T/C)       |
| 28030       | CadSNP3625     | <i>Desi</i>      | Ca_Desig_Chr04               | 16591970                       | (C/T)       |
| 28031       | CadSNP3626     | <i>Desi</i>      | Ca_Desig_Chr04               | 16706724                       | (G/A)       |
| 28032       | CadSNP3627     | <i>Desi</i>      | Ca_Desig_Chr04               | 16706770                       | (G/T)       |
| 28033       | CadSNP3628     | <i>Desi</i>      | Ca_Desig_Chr04               | 16716002                       | (A/C)       |
| 28034       | CadSNP3629     | <i>Desi</i>      | Ca_Desig_Chr04               | 16723042                       | (T/C)       |
| 28035       | CadSNP3630     | <i>Desi</i>      | Ca_Desig_Chr04               | 16729870                       | (T/C)       |
| 28036       | CadSNP3631     | <i>Desi</i>      | Ca_Desig_Chr04               | 16729998                       | (G/A)       |
| 28037       | CadSNP3632     | <i>Desi</i>      | Ca_Desig_Chr04               | 16791453                       | (G/A)       |
| 28038       | CadSNP3633     | <i>Desi</i>      | Ca_Desig_Chr04               | 16795445                       | (C/A)       |
| 28039       | CadSNP3634     | <i>Desi</i>      | Ca_Desig_Chr04               | 16818323                       | (A/G)       |
| 28040       | CadSNP3635     | <i>Desi</i>      | Ca_Desig_Chr04               | 16818333                       | (G/A)       |
| 28041       | CadSNP3636     | <i>Desi</i>      | Ca_Desig_Chr04               | 16818359                       | (G/A)       |
| 28042       | CadSNP3637     | <i>Desi</i>      | Ca_Desig_Chr04               | 16818409                       | (A/T)       |
| 28043       | CadSNP3638     | <i>Desi</i>      | Ca_Desig_Chr04               | 16894642                       | (C/A)       |

| <b>S.N.</b> | <b>SNP IDs</b> | <b>Cultivars</b> | <b>Chromosomes/scaffolds</b> | <b>Physical positions (bp)</b> | <b>SNPs</b> |
|-------------|----------------|------------------|------------------------------|--------------------------------|-------------|
| 28044       | CadSNP3639     | <i>Desi</i>      | Ca_Desig_Chr04               | 16894732                       | (T/G)       |
| 28045       | CadSNP3640     | <i>Desi</i>      | Ca_Desig_Chr04               | 16900160                       | (T/C)       |
| 28046       | CadSNP3641     | <i>Desi</i>      | Ca_Desig_Chr04               | 16900349                       | (A/G)       |
| 28047       | CadSNP3642     | <i>Desi</i>      | Ca_Desig_Chr04               | 16931700                       | (C/G)       |
| 28048       | CadSNP3643     | <i>Desi</i>      | Ca_Desig_Chr04               | 16950056                       | (C/T)       |
| 28049       | CadSNP3644     | <i>Desi</i>      | Ca_Desig_Chr04               | 16950110                       | (A/G)       |
| 28050       | CadSNP3645     | <i>Desi</i>      | Ca_Desig_Chr04               | 17026028                       | (T/G)       |
| 28051       | CadSNP3646     | <i>Desi</i>      | Ca_Desig_Chr04               | 17026071                       | (T/A)       |
| 28052       | CadSNP3647     | <i>Desi</i>      | Ca_Desig_Chr04               | 17919274                       | (C/T)       |
| 28053       | CadSNP3648     | <i>Desi</i>      | Ca_Desig_Chr04               | 17919244                       | (G/A)       |
| 28054       | CadSNP3649     | <i>Desi</i>      | Ca_Desig_Chr04               | 17931749                       | (T/A)       |
| 28055       | CadSNP3650     | <i>Desi</i>      | Ca_Desig_Chr04               | 17931752                       | (T/C)       |
| 28056       | CadSNP3651     | <i>Desi</i>      | Ca_Desig_Chr04               | 17931776                       | (A/C)       |
| 28057       | CadSNP3652     | <i>Desi</i>      | Ca_Desig_Chr04               | 17996121                       | (G/A)       |
| 28058       | CadSNP3653     | <i>Desi</i>      | Ca_Desig_Chr04               | 18064741                       | (G/A)       |
| 28059       | CadSNP3654     | <i>Desi</i>      | Ca_Desig_Chr04               | 18129339                       | (A/T)       |
| 28060       | CadSNP3655     | <i>Desi</i>      | Ca_Desig_Chr04               | 18131298                       | (C/G)       |
| 28061       | CadSNP3656     | <i>Desi</i>      | Ca_Desig_Chr04               | 18193185                       | (T/G)       |
| 28062       | CadSNP3657     | <i>Desi</i>      | Ca_Desig_Chr04               | 18198300                       | (G/T)       |
| 28063       | CadSNP3658     | <i>Desi</i>      | Ca_Desig_Chr04               | 18198339                       | (G/T)       |
| 28064       | CadSNP3659     | <i>Desi</i>      | Ca_Desig_Chr04               | 18199245                       | (A/G)       |
| 28065       | CadSNP3660     | <i>Desi</i>      | Ca_Desig_Chr04               | 18199714                       | (T/C)       |
| 28066       | CadSNP3661     | <i>Desi</i>      | Ca_Desig_Chr04               | 18227621                       | (T/C)       |
| 28067       | CadSNP3662     | <i>Desi</i>      | Ca_Desig_Chr04               | 18227647                       | (A/G)       |
| 28068       | CadSNP3663     | <i>Desi</i>      | Ca_Desig_Chr04               | 18267493                       | (G/A)       |
| 28069       | CadSNP3664     | <i>Desi</i>      | Ca_Desig_Chr04               | 18268355                       | (T/C)       |
| 28070       | CadSNP3665     | <i>Desi</i>      | Ca_Desig_Chr04               | 18268350                       | (C/T)       |
| 28071       | CadSNP3666     | <i>Desi</i>      | Ca_Desig_Chr04               | 18280066                       | (C/G)       |
| 28072       | CadSNP3667     | <i>Desi</i>      | Ca_Desig_Chr04               | 18280119                       | (C/T)       |
| 28073       | CadSNP3668     | <i>Desi</i>      | Ca_Desig_Chr04               | 18280131                       | (C/G)       |
| 28074       | CadSNP3669     | <i>Desi</i>      | Ca_Desig_Chr04               | 18291914                       | (G/C)       |
| 28075       | CadSNP3670     | <i>Desi</i>      | Ca_Desig_Chr04               | 18291889                       | (C/T)       |
| 28076       | CadSNP3671     | <i>Desi</i>      | Ca_Desig_Chr04               | 18313138                       | (T/C)       |
| 28077       | CadSNP3672     | <i>Desi</i>      | Ca_Desig_Chr04               | 18313400                       | (T/C)       |
| 28078       | CadSNP3673     | <i>Desi</i>      | Ca_Desig_Chr04               | 18313421                       | (G/A)       |
| 28079       | CadSNP3674     | <i>Desi</i>      | Ca_Desig_Chr04               | 18313486                       | (T/C)       |
| 28080       | CadSNP3675     | <i>Desi</i>      | Ca_Desig_Chr04               | 18323557                       | (G/C)       |
| 28081       | CadSNP3676     | <i>Desi</i>      | Ca_Desig_Chr04               | 18339785                       | (T/C)       |

| <b>S.N.</b> | <b>SNP IDs</b> | <b>Cultivars</b> | <b>Chromosomes/scaffolds</b> | <b>Physical positions (bp)</b> | <b>SNPs</b> |
|-------------|----------------|------------------|------------------------------|--------------------------------|-------------|
| 28082       | CadSNP3677     | <i>Desi</i>      | Ca_Desig_Chr04               | 18339893                       | (A/G)       |
| 28083       | CadSNP3678     | <i>Desi</i>      | Ca_Desig_Chr04               | 18339940                       | (C/T)       |
| 28084       | CadSNP3679     | <i>Desi</i>      | Ca_Desig_Chr04               | 18352810                       | (G/A)       |
| 28085       | CadSNP3680     | <i>Desi</i>      | Ca_Desig_Chr04               | 18366659                       | (G/A)       |
| 28086       | CadSNP3681     | <i>Desi</i>      | Ca_Desig_Chr04               | 18368255                       | (C/T)       |
| 28087       | CadSNP3682     | <i>Desi</i>      | Ca_Desig_Chr04               | 18369011                       | (A/G)       |
| 28088       | CadSNP3683     | <i>Desi</i>      | Ca_Desig_Chr04               | 18368995                       | (T/C)       |
| 28089       | CadSNP3684     | <i>Desi</i>      | Ca_Desig_Chr04               | 18369344                       | (G/C)       |
| 28090       | CadSNP3685     | <i>Desi</i>      | Ca_Desig_Chr04               | 18369484                       | (C/A)       |
| 28091       | CadSNP3686     | <i>Desi</i>      | Ca_Desig_Chr04               | 18369480                       | (C/T)       |
| 28092       | CadSNP3687     | <i>Desi</i>      | Ca_Desig_Chr04               | 18372411                       | (T/C)       |
| 28093       | CadSNP3688     | <i>Desi</i>      | Ca_Desig_Chr04               | 18392366                       | (G/C)       |
| 28094       | CadSNP3689     | <i>Desi</i>      | Ca_Desig_Chr04               | 18445805                       | (T/G)       |
| 28095       | CadSNP3690     | <i>Desi</i>      | Ca_Desig_Chr04               | 18445893                       | (C/T)       |
| 28096       | CadSNP3691     | <i>Desi</i>      | Ca_Desig_Chr04               | 18471741                       | (A/C)       |
| 28097       | CadSNP3692     | <i>Desi</i>      | Ca_Desig_Chr04               | 18508185                       | (A/G)       |
| 28098       | CadSNP3693     | <i>Desi</i>      | Ca_Desig_Chr04               | 18522039                       | (A/C)       |
| 28099       | CadSNP3694     | <i>Desi</i>      | Ca_Desig_Chr04               | 18523888                       | (G/A)       |
| 28100       | CadSNP3695     | <i>Desi</i>      | Ca_Desig_Chr04               | 18523926                       | (T/A)       |
| 28101       | CadSNP3696     | <i>Desi</i>      | Ca_Desig_Chr04               | 18625876                       | (T/A)       |
| 28102       | CadSNP3697     | <i>Desi</i>      | Ca_Desig_Chr04               | 18632718                       | (A/G)       |
| 28103       | CadSNP3698     | <i>Desi</i>      | Ca_Desig_Chr04               | 18663101                       | (T/A)       |
| 28104       | CadSNP3699     | <i>Desi</i>      | Ca_Desig_Chr04               | 18687591                       | (C/T)       |
| 28105       | CadSNP3700     | <i>Desi</i>      | Ca_Desig_Chr04               | 18760748                       | (T/C)       |
| 28106       | CadSNP3701     | <i>Desi</i>      | Ca_Desig_Chr04               | 18778220                       | (C/T)       |
| 28107       | CadSNP3702     | <i>Desi</i>      | Ca_Desig_Chr04               | 18790423                       | (T/C)       |
| 28108       | CadSNP3703     | <i>Desi</i>      | Ca_Desig_Chr04               | 18846789                       | (G/A)       |
| 28109       | CadSNP3704     | <i>Desi</i>      | Ca_Desig_Chr04               | 18846807                       | (C/T)       |
| 28110       | CadSNP3705     | <i>Desi</i>      | Ca_Desig_Chr04               | 18855366                       | (A/G)       |
| 28111       | CadSNP3706     | <i>Desi</i>      | Ca_Desig_Chr04               | 18855408                       | (C/G)       |
| 28112       | CadSNP3707     | <i>Desi</i>      | Ca_Desig_Chr04               | 18911805                       | (G/C)       |
| 28113       | CadSNP3708     | <i>Desi</i>      | Ca_Desig_Chr04               | 18924112                       | (G/T)       |
| 28114       | CadSNP3709     | <i>Desi</i>      | Ca_Desig_Chr04               | 18941507                       | (C/T)       |
| 28115       | CadSNP3710     | <i>Desi</i>      | Ca_Desig_Chr04               | 18941645                       | (A/G)       |
| 28116       | CadSNP3711     | <i>Desi</i>      | Ca_Desig_Chr04               | 20339221                       | (T/C)       |
| 28117       | CadSNP3712     | <i>Desi</i>      | Ca_Desig_Chr04               | 20360977                       | (C/T)       |
| 28118       | CadSNP3713     | <i>Desi</i>      | Ca_Desig_Chr04               | 20361078                       | (T/C)       |
| 28119       | CadSNP3714     | <i>Desi</i>      | Ca_Desig_Chr04               | 20369971                       | (T/C)       |

| <b>S.N.</b> | <b>SNP IDs</b> | <b>Cultivars</b> | <b>Chromosomes/scaffolds</b> | <b>Physical positions (bp)</b> | <b>SNPs</b> |
|-------------|----------------|------------------|------------------------------|--------------------------------|-------------|
| 28120       | CadSNP3715     | <i>Desi</i>      | Ca_Desig_Chr04               | 20386141                       | (T/C)       |
| 28121       | CadSNP3716     | <i>Desi</i>      | Ca_Desig_Chr04               | 20386231                       | (T/A)       |
| 28122       | CadSNP3717     | <i>Desi</i>      | Ca_Desig_Chr04               | 20386593                       | (C/G)       |
| 28123       | CadSNP3718     | <i>Desi</i>      | Ca_Desig_Chr04               | 20388518                       | (A/C)       |
| 28124       | CadSNP3719     | <i>Desi</i>      | Ca_Desig_Chr04               | 20388677                       | (A/G)       |
| 28125       | CadSNP3720     | <i>Desi</i>      | Ca_Desig_Chr04               | 20396629                       | (G/C)       |
| 28126       | CadSNP3721     | <i>Desi</i>      | Ca_Desig_Chr04               | 20405127                       | (C/T)       |
| 28127       | CadSNP3722     | <i>Desi</i>      | Ca_Desig_Chr04               | 20518130                       | (C/T)       |
| 28128       | CadSNP3723     | <i>Desi</i>      | Ca_Desig_Chr04               | 20518568                       | (C/T)       |
| 28129       | CadSNP3724     | <i>Desi</i>      | Ca_Desig_Chr04               | 20557265                       | (A/C)       |
| 28130       | CadSNP3725     | <i>Desi</i>      | Ca_Desig_Chr04               | 20574910                       | (T/G)       |
| 28131       | CadSNP3726     | <i>Desi</i>      | Ca_Desig_Chr04               | 20574891                       | (C/T)       |
| 28132       | CadSNP3727     | <i>Desi</i>      | Ca_Desig_Chr04               | 20580196                       | (T/G)       |
| 28133       | CadSNP3728     | <i>Desi</i>      | Ca_Desig_Chr04               | 20580207                       | (G/A)       |
| 28134       | CadSNP3729     | <i>Desi</i>      | Ca_Desig_Chr04               | 20580215                       | (C/T)       |
| 28135       | CadSNP3730     | <i>Desi</i>      | Ca_Desig_Chr04               | 20580218                       | (G/A)       |
| 28136       | CadSNP3731     | <i>Desi</i>      | Ca_Desig_Chr04               | 20580284                       | (C/T)       |
| 28137       | CadSNP3732     | <i>Desi</i>      | Ca_Desig_Chr04               | 20582382                       | (G/A)       |
| 28138       | CadSNP3733     | <i>Desi</i>      | Ca_Desig_Chr04               | 20582394                       | (A/C)       |
| 28139       | CadSNP3734     | <i>Desi</i>      | Ca_Desig_Chr04               | 20582489                       | (T/C)       |
| 28140       | CadSNP3735     | <i>Desi</i>      | Ca_Desig_Chr04               | 20585887                       | (T/G)       |
| 28141       | CadSNP3736     | <i>Desi</i>      | Ca_Desig_Chr04               | 20586515                       | (A/T)       |
| 28142       | CadSNP3737     | <i>Desi</i>      | Ca_Desig_Chr04               | 20614978                       | (A/G)       |
| 28143       | CadSNP3738     | <i>Desi</i>      | Ca_Desig_Chr04               | 20625667                       | (A/G)       |
| 28144       | CadSNP3739     | <i>Desi</i>      | Ca_Desig_Chr04               | 20625729                       | (C/A)       |
| 28145       | CadSNP3740     | <i>Desi</i>      | Ca_Desig_Chr04               | 20633467                       | (A/G)       |
| 28146       | CadSNP3741     | <i>Desi</i>      | Ca_Desig_Chr04               | 20661901                       | (A/G)       |
| 28147       | CadSNP3742     | <i>Desi</i>      | Ca_Desig_Chr04               | 20676423                       | (G/A)       |
| 28148       | CadSNP3743     | <i>Desi</i>      | Ca_Desig_Chr04               | 20710946                       | (T/C)       |
| 28149       | CadSNP3744     | <i>Desi</i>      | Ca_Desig_Chr04               | 20711005                       | (G/A)       |
| 28150       | CadSNP3745     | <i>Desi</i>      | Ca_Desig_Chr04               | 20711087                       | (C/G)       |
| 28151       | CadSNP3746     | <i>Desi</i>      | Ca_Desig_Chr04               | 20748169                       | (G/A)       |
| 28152       | CadSNP3747     | <i>Desi</i>      | Ca_Desig_Chr04               | 20748239                       | (G/C)       |
| 28153       | CadSNP3748     | <i>Desi</i>      | Ca_Desig_Chr04               | 20753169                       | (C/T)       |
| 28154       | CadSNP3749     | <i>Desi</i>      | Ca_Desig_Chr04               | 20753163                       | (C/T)       |
| 28155       | CadSNP3750     | <i>Desi</i>      | Ca_Desig_Chr04               | 20757214                       | (T/A)       |
| 28156       | CadSNP3751     | <i>Desi</i>      | Ca_Desig_Chr04               | 20757259                       | (C/T)       |
| 28157       | CadSNP3752     | <i>Desi</i>      | Ca_Desig_Chr04               | 20823263                       | (A/T)       |

| <b>S.N.</b> | <b>SNP IDs</b> | <b>Cultivars</b> | <b>Chromosomes/scaffolds</b> | <b>Physical positions (bp)</b> | <b>SNPs</b> |
|-------------|----------------|------------------|------------------------------|--------------------------------|-------------|
| 28158       | CadSNP3753     | <i>Desi</i>      | Ca_Desig_Chr04               | 20823265                       | (C/A)       |
| 28159       | CadSNP3754     | <i>Desi</i>      | Ca_Desig_Chr04               | 20823319                       | (C/T)       |
| 28160       | CadSNP3755     | <i>Desi</i>      | Ca_Desig_Chr04               | 20826023                       | (C/G)       |
| 28161       | CadSNP3756     | <i>Desi</i>      | Ca_Desig_Chr04               | 20841166                       | (C/G)       |
| 28162       | CadSNP3757     | <i>Desi</i>      | Ca_Desig_Chr04               | 20852160                       | (G/A)       |
| 28163       | CadSNP3758     | <i>Desi</i>      | Ca_Desig_Chr04               | 20855255                       | (T/C)       |
| 28164       | CadSNP3759     | <i>Desi</i>      | Ca_Desig_Chr04               | 20855302                       | (T/C)       |
| 28165       | CadSNP3760     | <i>Desi</i>      | Ca_Desig_Chr04               | 20855381                       | (A/G)       |
| 28166       | CadSNP3761     | <i>Desi</i>      | Ca_Desig_Chr04               | 20855389                       | (A/C)       |
| 28167       | CadSNP3762     | <i>Desi</i>      | Ca_Desig_Chr04               | 20870761                       | (T/C)       |
| 28168       | CadSNP3763     | <i>Desi</i>      | Ca_Desig_Chr04               | 20870767                       | (A/T)       |
| 28169       | CadSNP3764     | <i>Desi</i>      | Ca_Desig_Chr04               | 20870774                       | (A/G)       |
| 28170       | CadSNP3765     | <i>Desi</i>      | Ca_Desig_Chr04               | 20872345                       | (A/C)       |
| 28171       | CadSNP3766     | <i>Desi</i>      | Ca_Desig_Chr04               | 20879043                       | (T/C)       |
| 28172       | CadSNP3767     | <i>Desi</i>      | Ca_Desig_Chr04               | 20879169                       | (A/G)       |
| 28173       | CadSNP3768     | <i>Desi</i>      | Ca_Desig_Chr04               | 20879666                       | (T/C)       |
| 28174       | CadSNP3769     | <i>Desi</i>      | Ca_Desig_Chr04               | 20907979                       | (C/A)       |
| 28175       | CadSNP3770     | <i>Desi</i>      | Ca_Desig_Chr04               | 20922429                       | (T/C)       |
| 28176       | CadSNP3771     | <i>Desi</i>      | Ca_Desig_Chr04               | 20922435                       | (G/A)       |
| 28177       | CadSNP3772     | <i>Desi</i>      | Ca_Desig_Chr04               | 20922440                       | (A/G)       |
| 28178       | CadSNP3773     | <i>Desi</i>      | Ca_Desig_Chr04               | 20977274                       | (G/A)       |
| 28179       | CadSNP3774     | <i>Desi</i>      | Ca_Desig_Chr04               | 20996839                       | (G/C)       |
| 28180       | CadSNP3775     | <i>Desi</i>      | Ca_Desig_Chr04               | 21010335                       | (A/G)       |
| 28181       | CadSNP3776     | <i>Desi</i>      | Ca_Desig_Chr04               | 21010292                       | (T/G)       |
| 28182       | CadSNP3777     | <i>Desi</i>      | Ca_Desig_Chr04               | 21010291                       | (A/C)       |
| 28183       | CadSNP3778     | <i>Desi</i>      | Ca_Desig_Chr04               | 21045593                       | (T/C)       |
| 28184       | CadSNP3779     | <i>Desi</i>      | Ca_Desig_Chr04               | 21081471                       | (C/T)       |
| 28185       | CadSNP3780     | <i>Desi</i>      | Ca_Desig_Chr04               | 21144276                       | (A/G)       |
| 28186       | CadSNP3781     | <i>Desi</i>      | Ca_Desig_Chr04               | 21145277                       | (G/C)       |
| 28187       | CadSNP3782     | <i>Desi</i>      | Ca_Desig_Chr04               | 21145219                       | (C/G)       |
| 28188       | CadSNP3783     | <i>Desi</i>      | Ca_Desig_Chr04               | 21145724                       | (G/A)       |
| 28189       | CadSNP3784     | <i>Desi</i>      | Ca_Desig_Chr04               | 21145680                       | (A/G)       |
| 28190       | CadSNP3785     | <i>Desi</i>      | Ca_Desig_Chr04               | 21155495                       | (T/C)       |
| 28191       | CadSNP3786     | <i>Desi</i>      | Ca_Desig_Chr04               | 21157578                       | (C/T)       |
| 28192       | CadSNP3787     | <i>Desi</i>      | Ca_Desig_Chr04               | 21181520                       | (A/C)       |
| 28193       | CadSNP3788     | <i>Desi</i>      | Ca_Desig_Chr04               | 21181656                       | (G/C)       |
| 28194       | CadSNP3789     | <i>Desi</i>      | Ca_Desig_Chr04               | 21181685                       | (A/G)       |
| 28195       | CadSNP3790     | <i>Desi</i>      | Ca_Desig_Chr04               | 21181712                       | (C/T)       |



| <b>S.N.</b> | <b>SNP IDs</b> | <b>Cultivars</b> | <b>Chromosomes/scaffolds</b> | <b>Physical positions (bp)</b> | <b>SNPs</b> |
|-------------|----------------|------------------|------------------------------|--------------------------------|-------------|
| 28196       | CadSNP3791     | <i>Desi</i>      | Ca_Desig_Chr04               | 21181961                       | (G/A)       |
| 28197       | CadSNP3792     | <i>Desi</i>      | Ca_Desig_Chr04               | 21182067                       | (A/C)       |
| 28198       | CadSNP3793     | <i>Desi</i>      | Ca_Desig_Chr04               | 21187810                       | (G/T)       |
| 28199       | CadSNP3794     | <i>Desi</i>      | Ca_Desig_Chr04               | 21191223                       | (T/C)       |
| 28200       | CadSNP3795     | <i>Desi</i>      | Ca_Desig_Chr04               | 21221287                       | (A/G)       |
| 28201       | CadSNP3796     | <i>Desi</i>      | Ca_Desig_Chr04               | 21227078                       | (A/C)       |
| 28202       | CadSNP3797     | <i>Desi</i>      | Ca_Desig_Chr04               | 21238854                       | (T/C)       |
| 28203       | CadSNP3798     | <i>Desi</i>      | Ca_Desig_Chr04               | 21380341                       | (T/C)       |
| 28204       | CadSNP3799     | <i>Desi</i>      | Ca_Desig_Chr04               | 21382115                       | (A/G)       |
| 28205       | CadSNP3800     | <i>Desi</i>      | Ca_Desig_Chr04               | 21385541                       | (T/C)       |
| 28206       | CadSNP3801     | <i>Desi</i>      | Ca_Desig_Chr04               | 21398679                       | (A/C)       |
| 28207       | CadSNP3802     | <i>Desi</i>      | Ca_Desig_Chr04               | 21650184                       | (A/G)       |
| 28208       | CadSNP3803     | <i>Desi</i>      | Ca_Desig_Chr04               | 21650187                       | (G/A)       |
| 28209       | CadSNP3804     | <i>Desi</i>      | Ca_Desig_Chr04               | 21654308                       | (G/A)       |
| 28210       | CadSNP3805     | <i>Desi</i>      | Ca_Desig_Chr04               | 21654336                       | (A/T)       |
| 28211       | CadSNP3806     | <i>Desi</i>      | Ca_Desig_Chr04               | 21654463                       | (C/T)       |
| 28212       | CadSNP3807     | <i>Desi</i>      | Ca_Desig_Chr04               | 21654528                       | (T/C)       |
| 28213       | CadSNP3808     | <i>Desi</i>      | Ca_Desig_Chr04               | 21752147                       | (T/A)       |
| 28214       | CadSNP3809     | <i>Desi</i>      | Ca_Desig_Chr04               | 21752234                       | (A/T)       |
| 28215       | CadSNP3810     | <i>Desi</i>      | Ca_Desig_Chr04               | 21752216                       | (A/G)       |
| 28216       | CadSNP3811     | <i>Desi</i>      | Ca_Desig_Chr04               | 21788145                       | (T/A)       |
| 28217       | CadSNP3812     | <i>Desi</i>      | Ca_Desig_Chr04               | 21831559                       | (C/T)       |
| 28218       | CadSNP3813     | <i>Desi</i>      | Ca_Desig_Chr04               | 21837775                       | (A/T)       |
| 28219       | CadSNP3814     | <i>Desi</i>      | Ca_Desig_Chr04               | 21839520                       | (A/T)       |
| 28220       | CadSNP3815     | <i>Desi</i>      | Ca_Desig_Chr04               | 21862336                       | (G/T)       |
| 28221       | CadSNP3816     | <i>Desi</i>      | Ca_Desig_Chr04               | 21887261                       | (T/G)       |
| 28222       | CadSNP3817     | <i>Desi</i>      | Ca_Desig_Chr04               | 21887317                       | (C/T)       |
| 28223       | CadSNP3818     | <i>Desi</i>      | Ca_Desig_Chr04               | 21927865                       | (A/G)       |
| 28224       | CadSNP3819     | <i>Desi</i>      | Ca_Desig_Chr04               | 21928532                       | (C/T)       |
| 28225       | CadSNP3820     | <i>Desi</i>      | Ca_Desig_Chr04               | 21928536                       | (C/T)       |
| 28226       | CadSNP3821     | <i>Desi</i>      | Ca_Desig_Chr04               | 21928678                       | (T/A)       |
| 28227       | CadSNP3822     | <i>Desi</i>      | Ca_Desig_Chr04               | 21928665                       | (T/C)       |
| 28228       | CadSNP3823     | <i>Desi</i>      | Ca_Desig_Chr04               | 21982037                       | (A/C)       |
| 28229       | CadSNP3824     | <i>Desi</i>      | Ca_Desig_Chr04               | 22000338                       | (T/C)       |
| 28230       | CadSNP3825     | <i>Desi</i>      | Ca_Desig_Chr04               | 22000373                       | (T/C)       |
| 28231       | CadSNP3826     | <i>Desi</i>      | Ca_Desig_Chr04               | 22000428                       | (A/G)       |
| 28232       | CadSNP3827     | <i>Desi</i>      | Ca_Desig_Chr04               | 22037221                       | (C/A)       |
| 28233       | CadSNP3828     | <i>Desi</i>      | Ca_Desig_Chr05               | 37035                          | (T/A)       |

| <b>S.N.</b> | <b>SNP IDs</b> | <b>Cultivars</b> | <b>Chromosomes/scaffolds</b> | <b>Physical positions (bp)</b> | <b>SNPs</b> |
|-------------|----------------|------------------|------------------------------|--------------------------------|-------------|
| 28234       | CadSNP3829     | <i>Desi</i>      | Ca_Desig_Chr05               | 37173                          | (C/A)       |
| 28235       | CadSNP3830     | <i>Desi</i>      | Ca_Desig_Chr05               | 42449                          | (A/G)       |
| 28236       | CadSNP3831     | <i>Desi</i>      | Ca_Desig_Chr05               | 96304                          | (C/A)       |
| 28237       | CadSNP3832     | <i>Desi</i>      | Ca_Desig_Chr05               | 100313                         | (G/A)       |
| 28238       | CadSNP3833     | <i>Desi</i>      | Ca_Desig_Chr05               | 103929                         | (T/C)       |
| 28239       | CadSNP3834     | <i>Desi</i>      | Ca_Desig_Chr05               | 154234                         | (T/C)       |
| 28240       | CadSNP3835     | <i>Desi</i>      | Ca_Desig_Chr05               | 258865                         | (T/G)       |
| 28241       | CadSNP3836     | <i>Desi</i>      | Ca_Desig_Chr05               | 258877                         | (T/C)       |
| 28242       | CadSNP3837     | <i>Desi</i>      | Ca_Desig_Chr05               | 264322                         | (C/T)       |
| 28243       | CadSNP3838     | <i>Desi</i>      | Ca_Desig_Chr05               | 264325                         | (C/A)       |
| 28244       | CadSNP3839     | <i>Desi</i>      | Ca_Desig_Chr05               | 416110                         | (T/C)       |
| 28245       | CadSNP3840     | <i>Desi</i>      | Ca_Desig_Chr05               | 431477                         | (T/A)       |
| 28246       | CadSNP3841     | <i>Desi</i>      | Ca_Desig_Chr05               | 451451                         | (G/A)       |
| 28247       | CadSNP3842     | <i>Desi</i>      | Ca_Desig_Chr05               | 482748                         | (A/C)       |
| 28248       | CadSNP3843     | <i>Desi</i>      | Ca_Desig_Chr05               | 492472                         | (G/T)       |
| 28249       | CadSNP3844     | <i>Desi</i>      | Ca_Desig_Chr05               | 577934                         | (G/A)       |
| 28250       | CadSNP3845     | <i>Desi</i>      | Ca_Desig_Chr05               | 577987                         | (C/T)       |
| 28251       | CadSNP3846     | <i>Desi</i>      | Ca_Desig_Chr05               | 577999                         | (C/T)       |
| 28252       | CadSNP3847     | <i>Desi</i>      | Ca_Desig_Chr05               | 634143                         | (C/T)       |
| 28253       | CadSNP3848     | <i>Desi</i>      | Ca_Desig_Chr05               | 634312                         | (C/T)       |
| 28254       | CadSNP3849     | <i>Desi</i>      | Ca_Desig_Chr05               | 634310                         | (C/A)       |
| 28255       | CadSNP3850     | <i>Desi</i>      | Ca_Desig_Chr05               | 634302                         | (T/C)       |
| 28256       | CadSNP3851     | <i>Desi</i>      | Ca_Desig_Chr05               | 634300                         | (T/C)       |
| 28257       | CadSNP3852     | <i>Desi</i>      | Ca_Desig_Chr05               | 634296                         | (C/T)       |
| 28258       | CadSNP3853     | <i>Desi</i>      | Ca_Desig_Chr05               | 634238                         | (C/T)       |
| 28259       | CadSNP3854     | <i>Desi</i>      | Ca_Desig_Chr05               | 634232                         | (C/T)       |
| 28260       | CadSNP3855     | <i>Desi</i>      | Ca_Desig_Chr05               | 638974                         | (T/G)       |
| 28261       | CadSNP3856     | <i>Desi</i>      | Ca_Desig_Chr05               | 639133                         | (T/C)       |
| 28262       | CadSNP3857     | <i>Desi</i>      | Ca_Desig_Chr05               | 659816                         | (G/A)       |
| 28263       | CadSNP3858     | <i>Desi</i>      | Ca_Desig_Chr05               | 659875                         | (T/G)       |
| 28264       | CadSNP3859     | <i>Desi</i>      | Ca_Desig_Chr05               | 659877                         | (C/T)       |
| 28265       | CadSNP3860     | <i>Desi</i>      | Ca_Desig_Chr05               | 665311                         | (G/A)       |
| 28266       | CadSNP3861     | <i>Desi</i>      | Ca_Desig_Chr05               | 671982                         | (G/A)       |
| 28267       | CadSNP3862     | <i>Desi</i>      | Ca_Desig_Chr05               | 671979                         | (T/C)       |
| 28268       | CadSNP3863     | <i>Desi</i>      | Ca_Desig_Chr05               | 671968                         | (A/G)       |
| 28269       | CadSNP3864     | <i>Desi</i>      | Ca_Desig_Chr05               | 671963                         | (G/A)       |
| 28270       | CadSNP3865     | <i>Desi</i>      | Ca_Desig_Chr05               | 671961                         | (A/C)       |
| 28271       | CadSNP3866     | <i>Desi</i>      | Ca_Desig_Chr05               | 671959                         | (G/A)       |

| <b>S.N.</b> | <b>SNP IDs</b> | <b>Cultivars</b> | <b>Chromosomes/scaffolds</b> | <b>Physical positions (bp)</b> | <b>SNPs</b> |
|-------------|----------------|------------------|------------------------------|--------------------------------|-------------|
| 28272       | CadSNP3867     | <i>Desi</i>      | Ca_Desig_Chr05               | 671956                         | (A/G)       |
| 28273       | CadSNP3868     | <i>Desi</i>      | Ca_Desig_Chr05               | 671955                         | (C/T)       |
| 28274       | CadSNP3869     | <i>Desi</i>      | Ca_Desig_Chr05               | 676205                         | (C/T)       |
| 28275       | CadSNP3870     | <i>Desi</i>      | Ca_Desig_Chr05               | 689741                         | (T/A)       |
| 28276       | CadSNP3871     | <i>Desi</i>      | Ca_Desig_Chr05               | 1293765                        | (T/C)       |
| 28277       | CadSNP3872     | <i>Desi</i>      | Ca_Desig_Chr05               | 1294163                        | (A/G)       |
| 28278       | CadSNP3873     | <i>Desi</i>      | Ca_Desig_Chr05               | 1302892                        | (C/A)       |
| 28279       | CadSNP3874     | <i>Desi</i>      | Ca_Desig_Chr05               | 1304248                        | (A/G)       |
| 28280       | CadSNP3875     | <i>Desi</i>      | Ca_Desig_Chr05               | 1375814                        | (T/C)       |
| 28281       | CadSNP3876     | <i>Desi</i>      | Ca_Desig_Chr05               | 1375877                        | (G/A)       |
| 28282       | CadSNP3877     | <i>Desi</i>      | Ca_Desig_Chr05               | 1388307                        | (A/C)       |
| 28283       | CadSNP3878     | <i>Desi</i>      | Ca_Desig_Chr05               | 1392164                        | (T/G)       |
| 28284       | CadSNP3879     | <i>Desi</i>      | Ca_Desig_Chr05               | 1429149                        | (C/T)       |
| 28285       | CadSNP3880     | <i>Desi</i>      | Ca_Desig_Chr05               | 1434852                        | (T/C)       |
| 28286       | CadSNP3881     | <i>Desi</i>      | Ca_Desig_Chr05               | 1435590                        | (A/T)       |
| 28287       | CadSNP3882     | <i>Desi</i>      | Ca_Desig_Chr05               | 1440879                        | (G/A)       |
| 28288       | CadSNP3883     | <i>Desi</i>      | Ca_Desig_Chr05               | 1442759                        | (T/C)       |
| 28289       | CadSNP3884     | <i>Desi</i>      | Ca_Desig_Chr05               | 1469121                        | (G/A)       |
| 28290       | CadSNP3885     | <i>Desi</i>      | Ca_Desig_Chr05               | 1470975                        | (G/C)       |
| 28291       | CadSNP3886     | <i>Desi</i>      | Ca_Desig_Chr05               | 1471127                        | (T/C)       |
| 28292       | CadSNP3887     | <i>Desi</i>      | Ca_Desig_Chr05               | 1471636                        | (T/C)       |
| 28293       | CadSNP3888     | <i>Desi</i>      | Ca_Desig_Chr05               | 1471627                        | (T/C)       |
| 28294       | CadSNP3889     | <i>Desi</i>      | Ca_Desig_Chr05               | 1471623                        | (T/C)       |
| 28295       | CadSNP3890     | <i>Desi</i>      | Ca_Desig_Chr05               | 1471590                        | (A/C)       |
| 28296       | CadSNP3891     | <i>Desi</i>      | Ca_Desig_Chr05               | 1478144                        | (G/A)       |
| 28297       | CadSNP3892     | <i>Desi</i>      | Ca_Desig_Chr05               | 1483310                        | (T/G)       |
| 28298       | CadSNP3893     | <i>Desi</i>      | Ca_Desig_Chr05               | 1483398                        | (C/T)       |
| 28299       | CadSNP3894     | <i>Desi</i>      | Ca_Desig_Chr05               | 1483432                        | (G/A)       |
| 28300       | CadSNP3895     | <i>Desi</i>      | Ca_Desig_Chr05               | 1498913                        | (C/T)       |
| 28301       | CadSNP3896     | <i>Desi</i>      | Ca_Desig_Chr05               | 1498911                        | (G/A)       |
| 28302       | CadSNP3897     | <i>Desi</i>      | Ca_Desig_Chr05               | 1501343                        | (G/T)       |
| 28303       | CadSNP3898     | <i>Desi</i>      | Ca_Desig_Chr05               | 1501472                        | (T/C)       |
| 28304       | CadSNP3899     | <i>Desi</i>      | Ca_Desig_Chr05               | 1501486                        | (G/T)       |
| 28305       | CadSNP3900     | <i>Desi</i>      | Ca_Desig_Chr05               | 1501487                        | (A/C)       |
| 28306       | CadSNP3901     | <i>Desi</i>      | Ca_Desig_Chr05               | 1520333                        | (C/T)       |
| 28307       | CadSNP3902     | <i>Desi</i>      | Ca_Desig_Chr05               | 1612659                        | (C/T)       |
| 28308       | CadSNP3903     | <i>Desi</i>      | Ca_Desig_Chr05               | 1612663                        | (C/G)       |
| 28309       | CadSNP3904     | <i>Desi</i>      | Ca_Desig_Chr05               | 1612664                        | (A/G)       |

| <b>S.N.</b> | <b>SNP IDs</b> | <b>Cultivars</b> | <b>Chromosomes/scaffolds</b> | <b>Physical positions (bp)</b> | <b>SNPs</b> |
|-------------|----------------|------------------|------------------------------|--------------------------------|-------------|
| 28310       | CadSNP3905     | <i>Desi</i>      | Ca_Desig_Chr05               | 1612702                        | (A/G)       |
| 28311       | CadSNP3906     | <i>Desi</i>      | Ca_Desig_Chr05               | 1615972                        | (A/C)       |
| 28312       | CadSNP3907     | <i>Desi</i>      | Ca_Desig_Chr05               | 1616016                        | (A/C)       |
| 28313       | CadSNP3908     | <i>Desi</i>      | Ca_Desig_Chr05               | 1641902                        | (G/A)       |
| 28314       | CadSNP3909     | <i>Desi</i>      | Ca_Desig_Chr05               | 1676774                        | (C/T)       |
| 28315       | CadSNP3910     | <i>Desi</i>      | Ca_Desig_Chr05               | 1676793                        | (C/T)       |
| 28316       | CadSNP3911     | <i>Desi</i>      | Ca_Desig_Chr05               | 1676805                        | (A/T)       |
| 28317       | CadSNP3912     | <i>Desi</i>      | Ca_Desig_Chr05               | 1689024                        | (A/G)       |
| 28318       | CadSNP3913     | <i>Desi</i>      | Ca_Desig_Chr05               | 1689122                        | (C/T)       |
| 28319       | CadSNP3914     | <i>Desi</i>      | Ca_Desig_Chr05               | 1815887                        | (T/G)       |
| 28320       | CadSNP3915     | <i>Desi</i>      | Ca_Desig_Chr05               | 1841881                        | (G/A)       |
| 28321       | CadSNP3916     | <i>Desi</i>      | Ca_Desig_Chr05               | 1943187                        | (G/T)       |
| 28322       | CadSNP3917     | <i>Desi</i>      | Ca_Desig_Chr05               | 1943188                        | (T/G)       |
| 28323       | CadSNP3918     | <i>Desi</i>      | Ca_Desig_Chr05               | 1945270                        | (T/C)       |
| 28324       | CadSNP3919     | <i>Desi</i>      | Ca_Desig_Chr05               | 1945275                        | (T/C)       |
| 28325       | CadSNP3920     | <i>Desi</i>      | Ca_Desig_Chr05               | 1945284                        | (A/G)       |
| 28326       | CadSNP3921     | <i>Desi</i>      | Ca_Desig_Chr05               | 1945289                        | (C/T)       |
| 28327       | CadSNP3922     | <i>Desi</i>      | Ca_Desig_Chr05               | 1945304                        | (C/A)       |
| 28328       | CadSNP3923     | <i>Desi</i>      | Ca_Desig_Chr05               | 1980726                        | (C/T)       |
| 28329       | CadSNP3924     | <i>Desi</i>      | Ca_Desig_Chr05               | 1980736                        | (A/C)       |
| 28330       | CadSNP3925     | <i>Desi</i>      | Ca_Desig_Chr05               | 1993416                        | (G/A)       |
| 28331       | CadSNP3926     | <i>Desi</i>      | Ca_Desig_Chr05               | 2006955                        | (G/A)       |
| 28332       | CadSNP3927     | <i>Desi</i>      | Ca_Desig_Chr05               | 2007010                        | (C/T)       |
| 28333       | CadSNP3928     | <i>Desi</i>      | Ca_Desig_Chr05               | 2007070                        | (G/A)       |
| 28334       | CadSNP3929     | <i>Desi</i>      | Ca_Desig_Chr05               | 2007048                        | (A/T)       |
| 28335       | CadSNP3930     | <i>Desi</i>      | Ca_Desig_Chr05               | 2007025                        | (C/T)       |
| 28336       | CadSNP3931     | <i>Desi</i>      | Ca_Desig_Chr05               | 2007018                        | (C/A)       |
| 28337       | CadSNP3932     | <i>Desi</i>      | Ca_Desig_Chr05               | 2030295                        | (T/G)       |
| 28338       | CadSNP3933     | <i>Desi</i>      | Ca_Desig_Chr05               | 2030387                        | (A/G)       |
| 28339       | CadSNP3934     | <i>Desi</i>      | Ca_Desig_Chr05               | 2038304                        | (T/C)       |
| 28340       | CadSNP3935     | <i>Desi</i>      | Ca_Desig_Chr05               | 2083350                        | (G/T)       |
| 28341       | CadSNP3936     | <i>Desi</i>      | Ca_Desig_Chr05               | 2083393                        | (G/A)       |
| 28342       | CadSNP3937     | <i>Desi</i>      | Ca_Desig_Chr05               | 2101902                        | (A/C)       |
| 28343       | CadSNP3938     | <i>Desi</i>      | Ca_Desig_Chr05               | 2101928                        | (A/G)       |
| 28344       | CadSNP3939     | <i>Desi</i>      | Ca_Desig_Chr05               | 2303663                        | (A/C)       |
| 28345       | CadSNP3940     | <i>Desi</i>      | Ca_Desig_Chr05               | 2314518                        | (G/A)       |
| 28346       | CadSNP3941     | <i>Desi</i>      | Ca_Desig_Chr05               | 2325492                        | (G/C)       |
| 28347       | CadSNP3942     | <i>Desi</i>      | Ca_Desig_Chr05               | 2326204                        | (C/A)       |

| <b>S.N.</b> | <b>SNP IDs</b> | <b>Cultivars</b> | <b>Chromosomes/scaffolds</b> | <b>Physical positions (bp)</b> | <b>SNPs</b> |
|-------------|----------------|------------------|------------------------------|--------------------------------|-------------|
| 28348       | CadSNP3943     | <i>Desi</i>      | Ca_Desig_Chr05               | 2357849                        | (T/A)       |
| 28349       | CadSNP3944     | <i>Desi</i>      | Ca_Desig_Chr05               | 2434557                        | (A/G)       |
| 28350       | CadSNP3945     | <i>Desi</i>      | Ca_Desig_Chr05               | 2434548                        | (A/G)       |
| 28351       | CadSNP3946     | <i>Desi</i>      | Ca_Desig_Chr05               | 2484112                        | (T/A)       |
| 28352       | CadSNP3947     | <i>Desi</i>      | Ca_Desig_Chr05               | 2491971                        | (T/C)       |
| 28353       | CadSNP3948     | <i>Desi</i>      | Ca_Desig_Chr05               | 2536083                        | (C/G)       |
| 28354       | CadSNP3949     | <i>Desi</i>      | Ca_Desig_Chr05               | 2562520                        | (C/A)       |
| 28355       | CadSNP3950     | <i>Desi</i>      | Ca_Desig_Chr05               | 2587807                        | (T/G)       |
| 28356       | CadSNP3951     | <i>Desi</i>      | Ca_Desig_Chr05               | 2595925                        | (C/A)       |
| 28357       | CadSNP3952     | <i>Desi</i>      | Ca_Desig_Chr05               | 2606743                        | (A/G)       |
| 28358       | CadSNP3953     | <i>Desi</i>      | Ca_Desig_Chr05               | 2701112                        | (G/A)       |
| 28359       | CadSNP3954     | <i>Desi</i>      | Ca_Desig_Chr05               | 2720909                        | (G/T)       |
| 28360       | CadSNP3955     | <i>Desi</i>      | Ca_Desig_Chr05               | 2743869                        | (C/A)       |
| 28361       | CadSNP3956     | <i>Desi</i>      | Ca_Desig_Chr05               | 2745042                        | (A/T)       |
| 28362       | CadSNP3957     | <i>Desi</i>      | Ca_Desig_Chr05               | 2745052                        | (T/C)       |
| 28363       | CadSNP3958     | <i>Desi</i>      | Ca_Desig_Chr05               | 2745071                        | (T/G)       |
| 28364       | CadSNP3959     | <i>Desi</i>      | Ca_Desig_Chr05               | 2763807                        | (T/A)       |
| 28365       | CadSNP3960     | <i>Desi</i>      | Ca_Desig_Chr05               | 2763828                        | (T/G)       |
| 28366       | CadSNP3961     | <i>Desi</i>      | Ca_Desig_Chr05               | 2763839                        | (T/G)       |
| 28367       | CadSNP3962     | <i>Desi</i>      | Ca_Desig_Chr05               | 2764411                        | (C/T)       |
| 28368       | CadSNP3963     | <i>Desi</i>      | Ca_Desig_Chr05               | 2885352                        | (A/T)       |
| 28369       | CadSNP3964     | <i>Desi</i>      | Ca_Desig_Chr05               | 2958647                        | (C/G)       |
| 28370       | CadSNP3965     | <i>Desi</i>      | Ca_Desig_Chr05               | 2983407                        | (A/G)       |
| 28371       | CadSNP3966     | <i>Desi</i>      | Ca_Desig_Chr05               | 2983465                        | (G/A)       |
| 28372       | CadSNP3967     | <i>Desi</i>      | Ca_Desig_Chr05               | 2983482                        | (A/G)       |
| 28373       | CadSNP3968     | <i>Desi</i>      | Ca_Desig_Chr05               | 3001255                        | (A/T)       |
| 28374       | CadSNP3969     | <i>Desi</i>      | Ca_Desig_Chr05               | 3046631                        | (T/G)       |
| 28375       | CadSNP3970     | <i>Desi</i>      | Ca_Desig_Chr05               | 3046779                        | (G/T)       |
| 28376       | CadSNP3971     | <i>Desi</i>      | Ca_Desig_Chr05               | 3046861                        | (C/G)       |
| 28377       | CadSNP3972     | <i>Desi</i>      | Ca_Desig_Chr05               | 3046897                        | (T/C)       |
| 28378       | CadSNP3973     | <i>Desi</i>      | Ca_Desig_Chr05               | 3047053                        | (T/C)       |
| 28379       | CadSNP3974     | <i>Desi</i>      | Ca_Desig_Chr05               | 3047220                        | (A/T)       |
| 28380       | CadSNP3975     | <i>Desi</i>      | Ca_Desig_Chr05               | 3047196                        | (T/A)       |
| 28381       | CadSNP3976     | <i>Desi</i>      | Ca_Desig_Chr05               | 3064260                        | (A/T)       |
| 28382       | CadSNP3977     | <i>Desi</i>      | Ca_Desig_Chr05               | 3065677                        | (A/G)       |
| 28383       | CadSNP3978     | <i>Desi</i>      | Ca_Desig_Chr05               | 3087346                        | (C/G)       |
| 28384       | CadSNP3979     | <i>Desi</i>      | Ca_Desig_Chr05               | 3087354                        | (G/T)       |
| 28385       | CadSNP3980     | <i>Desi</i>      | Ca_Desig_Chr05               | 3103004                        | (C/T)       |

| <b>S.N.</b> | <b>SNP IDs</b> | <b>Cultivars</b> | <b>Chromosomes/scaffolds</b> | <b>Physical positions (bp)</b> | <b>SNPs</b> |
|-------------|----------------|------------------|------------------------------|--------------------------------|-------------|
| 28386       | CadSNP3981     | <i>Desi</i>      | Ca_Desig_Chr05               | 3103106                        | (A/G)       |
| 28387       | CadSNP3982     | <i>Desi</i>      | Ca_Desig_Chr05               | 3133747                        | (A/G)       |
| 28388       | CadSNP3983     | <i>Desi</i>      | Ca_Desig_Chr05               | 3133716                        | (C/T)       |
| 28389       | CadSNP3984     | <i>Desi</i>      | Ca_Desig_Chr05               | 3135617                        | (C/T)       |
| 28390       | CadSNP3985     | <i>Desi</i>      | Ca_Desig_Chr05               | 3136174                        | (T/A)       |
| 28391       | CadSNP3986     | <i>Desi</i>      | Ca_Desig_Chr05               | 3177288                        | (C/G)       |
| 28392       | CadSNP3987     | <i>Desi</i>      | Ca_Desig_Chr05               | 3177299                        | (T/C)       |
| 28393       | CadSNP3988     | <i>Desi</i>      | Ca_Desig_Chr05               | 3177374                        | (T/G)       |
| 28394       | CadSNP3989     | <i>Desi</i>      | Ca_Desig_Chr05               | 3177521                        | (G/A)       |
| 28395       | CadSNP3990     | <i>Desi</i>      | Ca_Desig_Chr05               | 3215569                        | (C/G)       |
| 28396       | CadSNP3991     | <i>Desi</i>      | Ca_Desig_Chr05               | 3218799                        | (C/T)       |
| 28397       | CadSNP3992     | <i>Desi</i>      | Ca_Desig_Chr05               | 3218980                        | (G/A)       |
| 28398       | CadSNP3993     | <i>Desi</i>      | Ca_Desig_Chr05               | 3218969                        | (A/G)       |
| 28399       | CadSNP3994     | <i>Desi</i>      | Ca_Desig_Chr05               | 3218961                        | (C/G)       |
| 28400       | CadSNP3995     | <i>Desi</i>      | Ca_Desig_Chr05               | 3219053                        | (T/A)       |
| 28401       | CadSNP3996     | <i>Desi</i>      | Ca_Desig_Chr05               | 3286108                        | (A/G)       |
| 28402       | CadSNP3997     | <i>Desi</i>      | Ca_Desig_Chr05               | 3286087                        | (T/G)       |
| 28403       | CadSNP3998     | <i>Desi</i>      | Ca_Desig_Chr05               | 3307425                        | (A/G)       |
| 28404       | CadSNP3999     | <i>Desi</i>      | Ca_Desig_Chr05               | 3307438                        | (A/C)       |
| 28405       | CadSNP4000     | <i>Desi</i>      | Ca_Desig_Chr05               | 3307697                        | (T/A)       |
| 28406       | CadSNP4001     | <i>Desi</i>      | Ca_Desig_Chr05               | 3383253                        | (G/C)       |
| 28407       | CadSNP4002     | <i>Desi</i>      | Ca_Desig_Chr05               | 3405281                        | (A/G)       |
| 28408       | CadSNP4003     | <i>Desi</i>      | Ca_Desig_Chr05               | 3405696                        | (C/T)       |
| 28409       | CadSNP4004     | <i>Desi</i>      | Ca_Desig_Chr05               | 3405715                        | (A/C)       |
| 28410       | CadSNP4005     | <i>Desi</i>      | Ca_Desig_Chr05               | 3441995                        | (G/T)       |
| 28411       | CadSNP4006     | <i>Desi</i>      | Ca_Desig_Chr05               | 3458647                        | (A/G)       |
| 28412       | CadSNP4007     | <i>Desi</i>      | Ca_Desig_Chr05               | 3458676                        | (A/C)       |
| 28413       | CadSNP4008     | <i>Desi</i>      | Ca_Desig_Chr05               | 3458703                        | (G/A)       |
| 28414       | CadSNP4009     | <i>Desi</i>      | Ca_Desig_Chr05               | 3459872                        | (G/T)       |
| 28415       | CadSNP4010     | <i>Desi</i>      | Ca_Desig_Chr05               | 3490298                        | (A/T)       |
| 28416       | CadSNP4011     | <i>Desi</i>      | Ca_Desig_Chr05               | 3490315                        | (G/A)       |
| 28417       | CadSNP4012     | <i>Desi</i>      | Ca_Desig_Chr05               | 3490365                        | (A/T)       |
| 28418       | CadSNP4013     | <i>Desi</i>      | Ca_Desig_Chr05               | 3543908                        | (A/G)       |
| 28419       | CadSNP4014     | <i>Desi</i>      | Ca_Desig_Chr05               | 3543906                        | (C/T)       |
| 28420       | CadSNP4015     | <i>Desi</i>      | Ca_Desig_Chr05               | 3543903                        | (A/G)       |
| 28421       | CadSNP4016     | <i>Desi</i>      | Ca_Desig_Chr05               | 3543900                        | (T/A)       |
| 28422       | CadSNP4017     | <i>Desi</i>      | Ca_Desig_Chr05               | 3543897                        | (A/T)       |
| 28423       | CadSNP4018     | <i>Desi</i>      | Ca_Desig_Chr05               | 3543894                        | (A/G)       |

| <b>S.N.</b> | <b>SNP IDs</b> | <b>Cultivars</b> | <b>Chromosomes/scaffolds</b> | <b>Physical positions (bp)</b> | <b>SNPs</b> |
|-------------|----------------|------------------|------------------------------|--------------------------------|-------------|
| 28424       | CadSNP4019     | <i>Desi</i>      | Ca_Desig_Chr05               | 3543891                        | (T/G)       |
| 28425       | CadSNP4020     | <i>Desi</i>      | Ca_Desig_Chr05               | 3543888                        | (G/T)       |
| 28426       | CadSNP4021     | <i>Desi</i>      | Ca_Desig_Chr05               | 3543882                        | (A/G)       |
| 28427       | CadSNP4022     | <i>Desi</i>      | Ca_Desig_Chr05               | 3543878                        | (A/G)       |
| 28428       | CadSNP4023     | <i>Desi</i>      | Ca_Desig_Chr05               | 3543873                        | (T/A)       |
| 28429       | CadSNP4024     | <i>Desi</i>      | Ca_Desig_Chr05               | 3543867                        | (G/A)       |
| 28430       | CadSNP4025     | <i>Desi</i>      | Ca_Desig_Chr05               | 3543866                        | (T/C)       |
| 28431       | CadSNP4026     | <i>Desi</i>      | Ca_Desig_Chr05               | 3543864                        | (G/A)       |
| 28432       | CadSNP4027     | <i>Desi</i>      | Ca_Desig_Chr05               | 3543861                        | (A/C)       |
| 28433       | CadSNP4028     | <i>Desi</i>      | Ca_Desig_Chr05               | 3543833                        | (G/C)       |
| 28434       | CadSNP4029     | <i>Desi</i>      | Ca_Desig_Chr05               | 4387287                        | (C/T)       |
| 28435       | CadSNP4030     | <i>Desi</i>      | Ca_Desig_Chr05               | 4413294                        | (G/A)       |
| 28436       | CadSNP4031     | <i>Desi</i>      | Ca_Desig_Chr05               | 4413292                        | (C/A)       |
| 28437       | CadSNP4032     | <i>Desi</i>      | Ca_Desig_Chr05               | 4413279                        | (C/G)       |
| 28438       | CadSNP4033     | <i>Desi</i>      | Ca_Desig_Chr05               | 4413259                        | (T/A)       |
| 28439       | CadSNP4034     | <i>Desi</i>      | Ca_Desig_Chr05               | 4413238                        | (G/A)       |
| 28440       | CadSNP4035     | <i>Desi</i>      | Ca_Desig_Chr05               | 4431421                        | (T/C)       |
| 28441       | CadSNP4036     | <i>Desi</i>      | Ca_Desig_Chr05               | 4435172                        | (C/T)       |
| 28442       | CadSNP4037     | <i>Desi</i>      | Ca_Desig_Chr05               | 4447429                        | (G/C)       |
| 28443       | CadSNP4038     | <i>Desi</i>      | Ca_Desig_Chr05               | 4514084                        | (A/G)       |
| 28444       | CadSNP4039     | <i>Desi</i>      | Ca_Desig_Chr05               | 4519764                        | (A/C)       |
| 28445       | CadSNP4040     | <i>Desi</i>      | Ca_Desig_Chr05               | 4553990                        | (G/A)       |
| 28446       | CadSNP4041     | <i>Desi</i>      | Ca_Desig_Chr05               | 4554039                        | (A/C)       |
| 28447       | CadSNP4042     | <i>Desi</i>      | Ca_Desig_Chr05               | 4563114                        | (A/G)       |
| 28448       | CadSNP4043     | <i>Desi</i>      | Ca_Desig_Chr05               | 4563111                        | (G/A)       |
| 28449       | CadSNP4044     | <i>Desi</i>      | Ca_Desig_Chr05               | 4597733                        | (G/A)       |
| 28450       | CadSNP4045     | <i>Desi</i>      | Ca_Desig_Chr05               | 4640466                        | (A/G)       |
| 28451       | CadSNP4046     | <i>Desi</i>      | Ca_Desig_Chr05               | 4684072                        | (A/C)       |
| 28452       | CadSNP4047     | <i>Desi</i>      | Ca_Desig_Chr05               | 4752845                        | (T/C)       |
| 28453       | CadSNP4048     | <i>Desi</i>      | Ca_Desig_Chr05               | 4755279                        | (G/A)       |
| 28454       | CadSNP4049     | <i>Desi</i>      | Ca_Desig_Chr05               | 4755864                        | (T/C)       |
| 28455       | CadSNP4050     | <i>Desi</i>      | Ca_Desig_Chr05               | 4779835                        | (C/T)       |
| 28456       | CadSNP4051     | <i>Desi</i>      | Ca_Desig_Chr05               | 4779890                        | (G/C)       |
| 28457       | CadSNP4052     | <i>Desi</i>      | Ca_Desig_Chr05               | 4779911                        | (A/C)       |
| 28458       | CadSNP4053     | <i>Desi</i>      | Ca_Desig_Chr05               | 4779903                        | (G/A)       |
| 28459       | CadSNP4054     | <i>Desi</i>      | Ca_Desig_Chr05               | 4779888                        | (T/C)       |
| 28460       | CadSNP4055     | <i>Desi</i>      | Ca_Desig_Chr05               | 4837594                        | (C/A)       |
| 28461       | CadSNP4056     | <i>Desi</i>      | Ca_Desig_Chr05               | 4837598                        | (A/G)       |

| <b>S.N.</b> | <b>SNP IDs</b> | <b>Cultivars</b> | <b>Chromosomes/scaffolds</b> | <b>Physical positions (bp)</b> | <b>SNPs</b> |
|-------------|----------------|------------------|------------------------------|--------------------------------|-------------|
| 28462       | CadSNP4057     | <i>Desi</i>      | Ca_Desig_Chr05               | 4839754                        | (T/C)       |
| 28463       | CadSNP4058     | <i>Desi</i>      | Ca_Desig_Chr05               | 4839745                        | (T/G)       |
| 28464       | CadSNP4059     | <i>Desi</i>      | Ca_Desig_Chr05               | 4839820                        | (G/A)       |
| 28465       | CadSNP4060     | <i>Desi</i>      | Ca_Desig_Chr05               | 4853779                        | (T/A)       |
| 28466       | CadSNP4061     | <i>Desi</i>      | Ca_Desig_Chr05               | 4854181                        | (A/G)       |
| 28467       | CadSNP4062     | <i>Desi</i>      | Ca_Desig_Chr05               | 4903471                        | (T/C)       |
| 28468       | CadSNP4063     | <i>Desi</i>      | Ca_Desig_Chr05               | 4903474                        | (G/A)       |
| 28469       | CadSNP4064     | <i>Desi</i>      | Ca_Desig_Chr05               | 4908534                        | (G/T)       |
| 28470       | CadSNP4065     | <i>Desi</i>      | Ca_Desig_Chr05               | 4909333                        | (G/A)       |
| 28471       | CadSNP4066     | <i>Desi</i>      | Ca_Desig_Chr05               | 4910019                        | (T/C)       |
| 28472       | CadSNP4067     | <i>Desi</i>      | Ca_Desig_Chr05               | 4910040                        | (T/C)       |
| 28473       | CadSNP4068     | <i>Desi</i>      | Ca_Desig_Chr05               | 4910643                        | (A/G)       |
| 28474       | CadSNP4069     | <i>Desi</i>      | Ca_Desig_Chr05               | 4931957                        | (G/A)       |
| 28475       | CadSNP4070     | <i>Desi</i>      | Ca_Desig_Chr05               | 4939754                        | (T/C)       |
| 28476       | CadSNP4071     | <i>Desi</i>      | Ca_Desig_Chr05               | 5004707                        | (T/C)       |
| 28477       | CadSNP4072     | <i>Desi</i>      | Ca_Desig_Chr05               | 5004767                        | (T/G)       |
| 28478       | CadSNP4073     | <i>Desi</i>      | Ca_Desig_Chr05               | 5008396                        | (G/T)       |
| 28479       | CadSNP4074     | <i>Desi</i>      | Ca_Desig_Chr05               | 5008373                        | (G/A)       |
| 28480       | CadSNP4075     | <i>Desi</i>      | Ca_Desig_Chr05               | 5008340                        | (T/C)       |
| 28481       | CadSNP4076     | <i>Desi</i>      | Ca_Desig_Chr05               | 5048604                        | (G/C)       |
| 28482       | CadSNP4077     | <i>Desi</i>      | Ca_Desig_Chr05               | 5093226                        | (G/A)       |
| 28483       | CadSNP4078     | <i>Desi</i>      | Ca_Desig_Chr05               | 5123315                        | (G/A)       |
| 28484       | CadSNP4079     | <i>Desi</i>      | Ca_Desig_Chr05               | 5193039                        | (A/G)       |
| 28485       | CadSNP4080     | <i>Desi</i>      | Ca_Desig_Chr05               | 5207791                        | (A/G)       |
| 28486       | CadSNP4081     | <i>Desi</i>      | Ca_Desig_Chr05               | 5215313                        | (T/C)       |
| 28487       | CadSNP4082     | <i>Desi</i>      | Ca_Desig_Chr05               | 5215341                        | (G/A)       |
| 28488       | CadSNP4083     | <i>Desi</i>      | Ca_Desig_Chr05               | 5232897                        | (C/G)       |
| 28489       | CadSNP4084     | <i>Desi</i>      | Ca_Desig_Chr05               | 5232900                        | (A/G)       |
| 28490       | CadSNP4085     | <i>Desi</i>      | Ca_Desig_Chr05               | 5232903                        | (A/G)       |
| 28491       | CadSNP4086     | <i>Desi</i>      | Ca_Desig_Chr05               | 5232912                        | (C/T)       |
| 28492       | CadSNP4087     | <i>Desi</i>      | Ca_Desig_Chr05               | 5232915                        | (G/T)       |
| 28493       | CadSNP4088     | <i>Desi</i>      | Ca_Desig_Chr05               | 5232930                        | (A/G)       |
| 28494       | CadSNP4089     | <i>Desi</i>      | Ca_Desig_Chr05               | 5232931                        | (A/C)       |
| 28495       | CadSNP4090     | <i>Desi</i>      | Ca_Desig_Chr05               | 5232934                        | (T/A)       |
| 28496       | CadSNP4091     | <i>Desi</i>      | Ca_Desig_Chr05               | 5232935                        | (G/A)       |
| 28497       | CadSNP4092     | <i>Desi</i>      | Ca_Desig_Chr05               | 5232942                        | (A/T)       |
| 28498       | CadSNP4093     | <i>Desi</i>      | Ca_Desig_Chr05               | 5232963                        | (A/G)       |
| 28499       | CadSNP4094     | <i>Desi</i>      | Ca_Desig_Chr05               | 5232978                        | (A/T)       |



| <b>S.N.</b> | <b>SNP IDs</b> | <b>Cultivars</b> | <b>Chromosomes/scaffolds</b> | <b>Physical positions (bp)</b> | <b>SNPs</b> |
|-------------|----------------|------------------|------------------------------|--------------------------------|-------------|
| 28500       | CadSNP4095     | <i>Desi</i>      | Ca_Desig_Chr05               | 5232981                        | (C/A)       |
| 28501       | CadSNP4096     | <i>Desi</i>      | Ca_Desig_Chr05               | 5307438                        | (T/A)       |
| 28502       | CadSNP4097     | <i>Desi</i>      | Ca_Desig_Chr05               | 5307468                        | (T/A)       |
| 28503       | CadSNP4098     | <i>Desi</i>      | Ca_Desig_Chr05               | 5328550                        | (G/A)       |
| 28504       | CadSNP4099     | <i>Desi</i>      | Ca_Desig_Chr05               | 5351439                        | (C/A)       |
| 28505       | CadSNP4100     | <i>Desi</i>      | Ca_Desig_Chr05               | 5354437                        | (A/C)       |
| 28506       | CadSNP4101     | <i>Desi</i>      | Ca_Desig_Chr05               | 5354468                        | (T/C)       |
| 28507       | CadSNP4102     | <i>Desi</i>      | Ca_Desig_Chr05               | 5354495                        | (T/C)       |
| 28508       | CadSNP4103     | <i>Desi</i>      | Ca_Desig_Chr05               | 5354773                        | (A/C)       |
| 28509       | CadSNP4104     | <i>Desi</i>      | Ca_Desig_Chr05               | 5361293                        | (G/A)       |
| 28510       | CadSNP4105     | <i>Desi</i>      | Ca_Desig_Chr05               | 5361353                        | (A/G)       |
| 28511       | CadSNP4106     | <i>Desi</i>      | Ca_Desig_Chr05               | 5361424                        | (A/G)       |
| 28512       | CadSNP4107     | <i>Desi</i>      | Ca_Desig_Chr05               | 5361490                        | (C/T)       |
| 28513       | CadSNP4108     | <i>Desi</i>      | Ca_Desig_Chr05               | 5361491                        | (T/G)       |
| 28514       | CadSNP4109     | <i>Desi</i>      | Ca_Desig_Chr05               | 5361596                        | (C/T)       |
| 28515       | CadSNP4110     | <i>Desi</i>      | Ca_Desig_Chr05               | 5361693                        | (C/A)       |
| 28516       | CadSNP4111     | <i>Desi</i>      | Ca_Desig_Chr05               | 5385508                        | (A/C)       |
| 28517       | CadSNP4112     | <i>Desi</i>      | Ca_Desig_Chr05               | 5385490                        | (A/C)       |
| 28518       | CadSNP4113     | <i>Desi</i>      | Ca_Desig_Chr05               | 5422848                        | (G/A)       |
| 28519       | CadSNP4114     | <i>Desi</i>      | Ca_Desig_Chr05               | 5422843                        | (T/C)       |
| 28520       | CadSNP4115     | <i>Desi</i>      | Ca_Desig_Chr05               | 5422841                        | (T/A)       |
| 28521       | CadSNP4116     | <i>Desi</i>      | Ca_Desig_Chr05               | 5437679                        | (A/G)       |
| 28522       | CadSNP4117     | <i>Desi</i>      | Ca_Desig_Chr05               | 5443683                        | (T/C)       |
| 28523       | CadSNP4118     | <i>Desi</i>      | Ca_Desig_Chr05               | 5465477                        | (A/G)       |
| 28524       | CadSNP4119     | <i>Desi</i>      | Ca_Desig_Chr05               | 5489922                        | (G/A)       |
| 28525       | CadSNP4120     | <i>Desi</i>      | Ca_Desig_Chr05               | 5492130                        | (A/C)       |
| 28526       | CadSNP4121     | <i>Desi</i>      | Ca_Desig_Chr05               | 5495953                        | (T/A)       |
| 28527       | CadSNP4122     | <i>Desi</i>      | Ca_Desig_Chr05               | 5495937                        | (C/A)       |
| 28528       | CadSNP4123     | <i>Desi</i>      | Ca_Desig_Chr05               | 5508852                        | (C/T)       |
| 28529       | CadSNP4124     | <i>Desi</i>      | Ca_Desig_Chr05               | 5508830                        | (C/T)       |
| 28530       | CadSNP4125     | <i>Desi</i>      | Ca_Desig_Chr05               | 5536470                        | (T/A)       |
| 28531       | CadSNP4126     | <i>Desi</i>      | Ca_Desig_Chr05               | 5536479                        | (T/A)       |
| 28532       | CadSNP4127     | <i>Desi</i>      | Ca_Desig_Chr05               | 5536523                        | (T/C)       |
| 28533       | CadSNP4128     | <i>Desi</i>      | Ca_Desig_Chr05               | 5556155                        | (G/A)       |
| 28534       | CadSNP4129     | <i>Desi</i>      | Ca_Desig_Chr05               | 5617835                        | (T/C)       |
| 28535       | CadSNP4130     | <i>Desi</i>      | Ca_Desig_Chr05               | 5624268                        | (A/T)       |
| 28536       | CadSNP4131     | <i>Desi</i>      | Ca_Desig_Chr05               | 5650365                        | (C/T)       |
| 28537       | CadSNP4132     | <i>Desi</i>      | Ca_Desig_Chr05               | 5650591                        | (T/A)       |

| <b>S.N.</b> | <b>SNP IDs</b> | <b>Cultivars</b> | <b>Chromosomes/scaffolds</b> | <b>Physical positions (bp)</b> | <b>SNPs</b> |
|-------------|----------------|------------------|------------------------------|--------------------------------|-------------|
| 28538       | CadSNP4133     | <i>Desi</i>      | Ca_Desig_Chr05               | 5656147                        | (G/A)       |
| 28539       | CadSNP4134     | <i>Desi</i>      | Ca_Desig_Chr05               | 5697397                        | (A/G)       |
| 28540       | CadSNP4135     | <i>Desi</i>      | Ca_Desig_Chr05               | 5697411                        | (G/T)       |
| 28541       | CadSNP4136     | <i>Desi</i>      | Ca_Desig_Chr05               | 5700721                        | (G/T)       |
| 28542       | CadSNP4137     | <i>Desi</i>      | Ca_Desig_Chr05               | 5738519                        | (G/T)       |
| 28543       | CadSNP4138     | <i>Desi</i>      | Ca_Desig_Chr05               | 5752245                        | (G/A)       |
| 28544       | CadSNP4139     | <i>Desi</i>      | Ca_Desig_Chr05               | 5775498                        | (G/A)       |
| 28545       | CadSNP4140     | <i>Desi</i>      | Ca_Desig_Chr05               | 5775559                        | (G/A)       |
| 28546       | CadSNP4141     | <i>Desi</i>      | Ca_Desig_Chr05               | 5775556                        | (G/A)       |
| 28547       | CadSNP4142     | <i>Desi</i>      | Ca_Desig_Chr05               | 5775568                        | (A/T)       |
| 28548       | CadSNP4143     | <i>Desi</i>      | Ca_Desig_Chr05               | 5775606                        | (A/T)       |
| 28549       | CadSNP4144     | <i>Desi</i>      | Ca_Desig_Chr05               | 5775651                        | (C/G)       |
| 28550       | CadSNP4145     | <i>Desi</i>      | Ca_Desig_Chr05               | 5775685                        | (C/T)       |
| 28551       | CadSNP4146     | <i>Desi</i>      | Ca_Desig_Chr05               | 5775672                        | (A/G)       |
| 28552       | CadSNP4147     | <i>Desi</i>      | Ca_Desig_Chr05               | 5797285                        | (G/A)       |
| 28553       | CadSNP4148     | <i>Desi</i>      | Ca_Desig_Chr05               | 5797408                        | (T/C)       |
| 28554       | CadSNP4149     | <i>Desi</i>      | Ca_Desig_Chr05               | 5821471                        | (G/A)       |
| 28555       | CadSNP4150     | <i>Desi</i>      | Ca_Desig_Chr05               | 5864400                        | (T/A)       |
| 28556       | CadSNP4151     | <i>Desi</i>      | Ca_Desig_Chr05               | 5864394                        | (C/G)       |
| 28557       | CadSNP4152     | <i>Desi</i>      | Ca_Desig_Chr05               | 5973619                        | (C/T)       |
| 28558       | CadSNP4153     | <i>Desi</i>      | Ca_Desig_Chr05               | 5973618                        | (C/T)       |
| 28559       | CadSNP4154     | <i>Desi</i>      | Ca_Desig_Chr05               | 5973615                        | (C/T)       |
| 28560       | CadSNP4155     | <i>Desi</i>      | Ca_Desig_Chr05               | 5973605                        | (A/T)       |
| 28561       | CadSNP4156     | <i>Desi</i>      | Ca_Desig_Chr05               | 5973601                        | (C/T)       |
| 28562       | CadSNP4157     | <i>Desi</i>      | Ca_Desig_Chr05               | 5973587                        | (G/A)       |
| 28563       | CadSNP4158     | <i>Desi</i>      | Ca_Desig_Chr05               | 5973566                        | (A/G)       |
| 28564       | CadSNP4159     | <i>Desi</i>      | Ca_Desig_Chr05               | 5973564                        | (A/G)       |
| 28565       | CadSNP4160     | <i>Desi</i>      | Ca_Desig_Chr05               | 5973542                        | (T/G)       |
| 28566       | CadSNP4161     | <i>Desi</i>      | Ca_Desig_Chr05               | 5973628                        | (C/A)       |
| 28567       | CadSNP4162     | <i>Desi</i>      | Ca_Desig_Chr05               | 5976545                        | (T/A)       |
| 28568       | CadSNP4163     | <i>Desi</i>      | Ca_Desig_Chr05               | 5976534                        | (T/G)       |
| 28569       | CadSNP4164     | <i>Desi</i>      | Ca_Desig_Chr05               | 5986099                        | (A/G)       |
| 28570       | CadSNP4165     | <i>Desi</i>      | Ca_Desig_Chr05               | 5986239                        | (A/G)       |
| 28571       | CadSNP4166     | <i>Desi</i>      | Ca_Desig_Chr05               | 5999535                        | (A/C)       |
| 28572       | CadSNP4167     | <i>Desi</i>      | Ca_Desig_Chr05               | 5999539                        | (G/C)       |
| 28573       | CadSNP4168     | <i>Desi</i>      | Ca_Desig_Chr05               | 6011223                        | (T/G)       |
| 28574       | CadSNP4169     | <i>Desi</i>      | Ca_Desig_Chr05               | 6011254                        | (G/A)       |
| 28575       | CadSNP4170     | <i>Desi</i>      | Ca_Desig_Chr05               | 6011384                        | (A/T)       |

| <b>S.N.</b> | <b>SNP IDs</b> | <b>Cultivars</b> | <b>Chromosomes/scaffolds</b> | <b>Physical positions (bp)</b> | <b>SNPs</b> |
|-------------|----------------|------------------|------------------------------|--------------------------------|-------------|
| 28576       | CadSNP4171     | <i>Desi</i>      | Ca_Desig_Chr05               | 6013724                        | (G/C)       |
| 28577       | CadSNP4172     | <i>Desi</i>      | Ca_Desig_Chr05               | 6016203                        | (A/G)       |
| 28578       | CadSNP4173     | <i>Desi</i>      | Ca_Desig_Chr05               | 6017691                        | (A/T)       |
| 28579       | CadSNP4174     | <i>Desi</i>      | Ca_Desig_Chr05               | 6017697                        | (G/A)       |
| 28580       | CadSNP4175     | <i>Desi</i>      | Ca_Desig_Chr05               | 6088929                        | (A/C)       |
| 28581       | CadSNP4176     | <i>Desi</i>      | Ca_Desig_Chr05               | 6268417                        | (A/C)       |
| 28582       | CadSNP4177     | <i>Desi</i>      | Ca_Desig_Chr05               | 6270240                        | (C/T)       |
| 28583       | CadSNP4178     | <i>Desi</i>      | Ca_Desig_Chr05               | 6320255                        | (T/C)       |
| 28584       | CadSNP4179     | <i>Desi</i>      | Ca_Desig_Chr05               | 6320247                        | (G/C)       |
| 28585       | CadSNP4180     | <i>Desi</i>      | Ca_Desig_Chr05               | 6374216                        | (T/C)       |
| 28586       | CadSNP4181     | <i>Desi</i>      | Ca_Desig_Chr05               | 6376547                        | (T/C)       |
| 28587       | CadSNP4182     | <i>Desi</i>      | Ca_Desig_Chr05               | 6376546                        | (A/T)       |
| 28588       | CadSNP4183     | <i>Desi</i>      | Ca_Desig_Chr05               | 6376597                        | (G/A)       |
| 28589       | CadSNP4184     | <i>Desi</i>      | Ca_Desig_Chr05               | 6376604                        | (A/G)       |
| 28590       | CadSNP4185     | <i>Desi</i>      | Ca_Desig_Chr05               | 6376673                        | (C/T)       |
| 28591       | CadSNP4186     | <i>Desi</i>      | Ca_Desig_Chr05               | 6381857                        | (G/A)       |
| 28592       | CadSNP4187     | <i>Desi</i>      | Ca_Desig_Chr05               | 6381846                        | (G/C)       |
| 28593       | CadSNP4188     | <i>Desi</i>      | Ca_Desig_Chr05               | 6383655                        | (T/G)       |
| 28594       | CadSNP4189     | <i>Desi</i>      | Ca_Desig_Chr05               | 6416735                        | (C/T)       |
| 28595       | CadSNP4190     | <i>Desi</i>      | Ca_Desig_Chr05               | 6435244                        | (C/A)       |
| 28596       | CadSNP4191     | <i>Desi</i>      | Ca_Desig_Chr05               | 6435202                        | (G/A)       |
| 28597       | CadSNP4192     | <i>Desi</i>      | Ca_Desig_Chr05               | 6458466                        | (G/A)       |
| 28598       | CadSNP4193     | <i>Desi</i>      | Ca_Desig_Chr05               | 6547189                        | (G/A)       |
| 28599       | CadSNP4194     | <i>Desi</i>      | Ca_Desig_Chr05               | 6565008                        | (A/C)       |
| 28600       | CadSNP4195     | <i>Desi</i>      | Ca_Desig_Chr05               | 6621677                        | (G/A)       |
| 28601       | CadSNP4196     | <i>Desi</i>      | Ca_Desig_Chr05               | 6700049                        | (C/T)       |
| 28602       | CadSNP4197     | <i>Desi</i>      | Ca_Desig_Chr05               | 6730545                        | (T/A)       |
| 28603       | CadSNP4198     | <i>Desi</i>      | Ca_Desig_Chr05               | 6730657                        | (T/C)       |
| 28604       | CadSNP4199     | <i>Desi</i>      | Ca_Desig_Chr05               | 6810990                        | (C/A)       |
| 28605       | CadSNP4200     | <i>Desi</i>      | Ca_Desig_Chr05               | 6834908                        | (G/A)       |
| 28606       | CadSNP4201     | <i>Desi</i>      | Ca_Desig_Chr05               | 6842650                        | (C/A)       |
| 28607       | CadSNP4202     | <i>Desi</i>      | Ca_Desig_Chr05               | 6842664                        | (T/C)       |
| 28608       | CadSNP4203     | <i>Desi</i>      | Ca_Desig_Chr05               | 6842704                        | (A/G)       |
| 28609       | CadSNP4204     | <i>Desi</i>      | Ca_Desig_Chr05               | 6842804                        | (G/A)       |
| 28610       | CadSNP4205     | <i>Desi</i>      | Ca_Desig_Chr05               | 6842761                        | (C/T)       |
| 28611       | CadSNP4206     | <i>Desi</i>      | Ca_Desig_Chr05               | 6885320                        | (A/T)       |
| 28612       | CadSNP4207     | <i>Desi</i>      | Ca_Desig_Chr05               | 6885390                        | (A/G)       |
| 28613       | CadSNP4208     | <i>Desi</i>      | Ca_Desig_Chr05               | 6900820                        | (T/C)       |

| <b>S.N.</b> | <b>SNP IDs</b> | <b>Cultivars</b> | <b>Chromosomes/scaffolds</b> | <b>Physical positions (bp)</b> | <b>SNPs</b> |
|-------------|----------------|------------------|------------------------------|--------------------------------|-------------|
| 28614       | CadSNP4209     | <i>Desi</i>      | Ca_Desig_Chr05               | 6900875                        | (A/G)       |
| 28615       | CadSNP4210     | <i>Desi</i>      | Ca_Desig_Chr05               | 6902546                        | (G/A)       |
| 28616       | CadSNP4211     | <i>Desi</i>      | Ca_Desig_Chr05               | 6910773                        | (G/T)       |
| 28617       | CadSNP4212     | <i>Desi</i>      | Ca_Desig_Chr05               | 6930653                        | (A/G)       |
| 28618       | CadSNP4213     | <i>Desi</i>      | Ca_Desig_Chr05               | 6930799                        | (A/G)       |
| 28619       | CadSNP4214     | <i>Desi</i>      | Ca_Desig_Chr05               | 6930890                        | (G/A)       |
| 28620       | CadSNP4215     | <i>Desi</i>      | Ca_Desig_Chr05               | 6930891                        | (C/T)       |
| 28621       | CadSNP4216     | <i>Desi</i>      | Ca_Desig_Chr05               | 6938351                        | (G/A)       |
| 28622       | CadSNP4217     | <i>Desi</i>      | Ca_Desig_Chr05               | 6938808                        | (G/C)       |
| 28623       | CadSNP4218     | <i>Desi</i>      | Ca_Desig_Chr05               | 6938967                        | (G/A)       |
| 28624       | CadSNP4219     | <i>Desi</i>      | Ca_Desig_Chr05               | 6939010                        | (T/C)       |
| 28625       | CadSNP4220     | <i>Desi</i>      | Ca_Desig_Chr05               | 6942511                        | (A/C)       |
| 28626       | CadSNP4221     | <i>Desi</i>      | Ca_Desig_Chr05               | 6949136                        | (G/T)       |
| 28627       | CadSNP4222     | <i>Desi</i>      | Ca_Desig_Chr05               | 6949110                        | (T/C)       |
| 28628       | CadSNP4223     | <i>Desi</i>      | Ca_Desig_Chr05               | 6950713                        | (C/G)       |
| 28629       | CadSNP4224     | <i>Desi</i>      | Ca_Desig_Chr05               | 6951289                        | (A/C)       |
| 28630       | CadSNP4225     | <i>Desi</i>      | Ca_Desig_Chr05               | 6976313                        | (T/C)       |
| 28631       | CadSNP4226     | <i>Desi</i>      | Ca_Desig_Chr05               | 6991209                        | (T/C)       |
| 28632       | CadSNP4227     | <i>Desi</i>      | Ca_Desig_Chr05               | 6991200                        | (T/C)       |
| 28633       | CadSNP4228     | <i>Desi</i>      | Ca_Desig_Chr05               | 7003223                        | (C/T)       |
| 28634       | CadSNP4229     | <i>Desi</i>      | Ca_Desig_Chr05               | 7035127                        | (C/T)       |
| 28635       | CadSNP4230     | <i>Desi</i>      | Ca_Desig_Chr05               | 7036652                        | (T/C)       |
| 28636       | CadSNP4231     | <i>Desi</i>      | Ca_Desig_Chr05               | 7052493                        | (A/C)       |
| 28637       | CadSNP4232     | <i>Desi</i>      | Ca_Desig_Chr05               | 7052494                        | (G/T)       |
| 28638       | CadSNP4233     | <i>Desi</i>      | Ca_Desig_Chr05               | 7062009                        | (C/A)       |
| 28639       | CadSNP4234     | <i>Desi</i>      | Ca_Desig_Chr05               | 7064434                        | (T/C)       |
| 28640       | CadSNP4235     | <i>Desi</i>      | Ca_Desig_Chr05               | 7064373                        | (A/G)       |
| 28641       | CadSNP4236     | <i>Desi</i>      | Ca_Desig_Chr05               | 7064529                        | (A/G)       |
| 28642       | CadSNP4237     | <i>Desi</i>      | Ca_Desig_Chr05               | 7064622                        | (C/G)       |
| 28643       | CadSNP4238     | <i>Desi</i>      | Ca_Desig_Chr05               | 7064839                        | (T/G)       |
| 28644       | CadSNP4239     | <i>Desi</i>      | Ca_Desig_Chr05               | 7116373                        | (A/G)       |
| 28645       | CadSNP4240     | <i>Desi</i>      | Ca_Desig_Chr05               | 7119938                        | (C/A)       |
| 28646       | CadSNP4241     | <i>Desi</i>      | Ca_Desig_Chr05               | 7140443                        | (A/G)       |
| 28647       | CadSNP4242     | <i>Desi</i>      | Ca_Desig_Chr05               | 7170598                        | (C/A)       |
| 28648       | CadSNP4243     | <i>Desi</i>      | Ca_Desig_Chr05               | 7170758                        | (A/G)       |
| 28649       | CadSNP4244     | <i>Desi</i>      | Ca_Desig_Chr05               | 7190970                        | (C/T)       |
| 28650       | CadSNP4245     | <i>Desi</i>      | Ca_Desig_Chr05               | 7266594                        | (T/G)       |
| 28651       | CadSNP4246     | <i>Desi</i>      | Ca_Desig_Chr05               | 7298869                        | (T/G)       |

| <b>S.N.</b> | <b>SNP IDs</b> | <b>Cultivars</b> | <b>Chromosomes/scaffolds</b> | <b>Physical positions (bp)</b> | <b>SNPs</b> |
|-------------|----------------|------------------|------------------------------|--------------------------------|-------------|
| 28652       | CadSNP4247     | <i>Desi</i>      | Ca_Desig_Chr05               | 7299017                        | (C/T)       |
| 28653       | CadSNP4248     | <i>Desi</i>      | Ca_Desig_Chr05               | 7311838                        | (C/T)       |
| 28654       | CadSNP4249     | <i>Desi</i>      | Ca_Desig_Chr05               | 7357338                        | (G/A)       |
| 28655       | CadSNP4250     | <i>Desi</i>      | Ca_Desig_Chr05               | 7521948                        | (C/T)       |
| 28656       | CadSNP4251     | <i>Desi</i>      | Ca_Desig_Chr05               | 7569517                        | (G/A)       |
| 28657       | CadSNP4252     | <i>Desi</i>      | Ca_Desig_Chr05               | 7585897                        | (C/T)       |
| 28658       | CadSNP4253     | <i>Desi</i>      | Ca_Desig_Chr05               | 7585899                        | (A/G)       |
| 28659       | CadSNP4254     | <i>Desi</i>      | Ca_Desig_Chr05               | 7623578                        | (G/C)       |
| 28660       | CadSNP4255     | <i>Desi</i>      | Ca_Desig_Chr05               | 7628965                        | (C/T)       |
| 28661       | CadSNP4256     | <i>Desi</i>      | Ca_Desig_Chr05               | 7637555                        | (A/C)       |
| 28662       | CadSNP4257     | <i>Desi</i>      | Ca_Desig_Chr05               | 7637572                        | (A/G)       |
| 28663       | CadSNP4258     | <i>Desi</i>      | Ca_Desig_Chr05               | 7646663                        | (C/T)       |
| 28664       | CadSNP4259     | <i>Desi</i>      | Ca_Desig_Chr05               | 7648423                        | (C/T)       |
| 28665       | CadSNP4260     | <i>Desi</i>      | Ca_Desig_Chr05               | 7648443                        | (C/T)       |
| 28666       | CadSNP4261     | <i>Desi</i>      | Ca_Desig_Chr05               | 7648641                        | (T/C)       |
| 28667       | CadSNP4262     | <i>Desi</i>      | Ca_Desig_Chr05               | 7681731                        | (A/G)       |
| 28668       | CadSNP4263     | <i>Desi</i>      | Ca_Desig_Chr05               | 7681739                        | (A/G)       |
| 28669       | CadSNP4264     | <i>Desi</i>      | Ca_Desig_Chr05               | 7681810                        | (A/T)       |
| 28670       | CadSNP4265     | <i>Desi</i>      | Ca_Desig_Chr05               | 7694876                        | (C/T)       |
| 28671       | CadSNP4266     | <i>Desi</i>      | Ca_Desig_Chr05               | 7699256                        | (T/G)       |
| 28672       | CadSNP4267     | <i>Desi</i>      | Ca_Desig_Chr05               | 7699357                        | (A/C)       |
| 28673       | CadSNP4268     | <i>Desi</i>      | Ca_Desig_Chr05               | 7716848                        | (T/C)       |
| 28674       | CadSNP4269     | <i>Desi</i>      | Ca_Desig_Chr05               | 7716984                        | (A/T)       |
| 28675       | CadSNP4270     | <i>Desi</i>      | Ca_Desig_Chr05               | 7768602                        | (C/T)       |
| 28676       | CadSNP4271     | <i>Desi</i>      | Ca_Desig_Chr05               | 7769108                        | (A/G)       |
| 28677       | CadSNP4272     | <i>Desi</i>      | Ca_Desig_Chr05               | 7803599                        | (T/A)       |
| 28678       | CadSNP4273     | <i>Desi</i>      | Ca_Desig_Chr05               | 7806843                        | (G/A)       |
| 28679       | CadSNP4274     | <i>Desi</i>      | Ca_Desig_Chr05               | 7827695                        | (C/T)       |
| 28680       | CadSNP4275     | <i>Desi</i>      | Ca_Desig_Chr05               | 7835487                        | (T/C)       |
| 28681       | CadSNP4276     | <i>Desi</i>      | Ca_Desig_Chr05               | 7835484                        | (G/C)       |
| 28682       | CadSNP4277     | <i>Desi</i>      | Ca_Desig_Chr05               | 7835498                        | (A/C)       |
| 28683       | CadSNP4278     | <i>Desi</i>      | Ca_Desig_Chr05               | 7873295                        | (G/A)       |
| 28684       | CadSNP4279     | <i>Desi</i>      | Ca_Desig_Chr05               | 7873304                        | (A/T)       |
| 28685       | CadSNP4280     | <i>Desi</i>      | Ca_Desig_Chr05               | 7873361                        | (T/G)       |
| 28686       | CadSNP4281     | <i>Desi</i>      | Ca_Desig_Chr05               | 7873372                        | (A/G)       |
| 28687       | CadSNP4282     | <i>Desi</i>      | Ca_Desig_Chr05               | 7918557                        | (G/A)       |
| 28688       | CadSNP4283     | <i>Desi</i>      | Ca_Desig_Chr05               | 7932467                        | (T/G)       |
| 28689       | CadSNP4284     | <i>Desi</i>      | Ca_Desig_Chr05               | 7932496                        | (C/A)       |

| <b>S.N.</b> | <b>SNP IDs</b> | <b>Cultivars</b> | <b>Chromosomes/scaffolds</b> | <b>Physical positions (bp)</b> | <b>SNPs</b> |
|-------------|----------------|------------------|------------------------------|--------------------------------|-------------|
| 28690       | CadSNP4285     | <i>Desi</i>      | Ca_Desig_Chr05               | 7952485                        | (T/C)       |
| 28691       | CadSNP4286     | <i>Desi</i>      | Ca_Desig_Chr05               | 7953772                        | (G/A)       |
| 28692       | CadSNP4287     | <i>Desi</i>      | Ca_Desig_Chr05               | 7953755                        | (C/T)       |
| 28693       | CadSNP4288     | <i>Desi</i>      | Ca_Desig_Chr05               | 7962814                        | (T/C)       |
| 28694       | CadSNP4289     | <i>Desi</i>      | Ca_Desig_Chr05               | 7972155                        | (T/C)       |
| 28695       | CadSNP4290     | <i>Desi</i>      | Ca_Desig_Chr05               | 7972200                        | (C/T)       |
| 28696       | CadSNP4291     | <i>Desi</i>      | Ca_Desig_Chr05               | 7995427                        | (C/A)       |
| 28697       | CadSNP4292     | <i>Desi</i>      | Ca_Desig_Chr05               | 8017612                        | (T/C)       |
| 28698       | CadSNP4293     | <i>Desi</i>      | Ca_Desig_Chr05               | 8077674                        | (T/C)       |
| 28699       | CadSNP4294     | <i>Desi</i>      | Ca_Desig_Chr05               | 8083918                        | (A/C)       |
| 28700       | CadSNP4295     | <i>Desi</i>      | Ca_Desig_Chr05               | 8145675                        | (C/T)       |
| 28701       | CadSNP4296     | <i>Desi</i>      | Ca_Desig_Chr05               | 8153778                        | (T/C)       |
| 28702       | CadSNP4297     | <i>Desi</i>      | Ca_Desig_Chr05               | 8153773                        | (G/T)       |
| 28703       | CadSNP4298     | <i>Desi</i>      | Ca_Desig_Chr05               | 8153769                        | (G/A)       |
| 28704       | CadSNP4299     | <i>Desi</i>      | Ca_Desig_Chr05               | 8153763                        | (T/A)       |
| 28705       | CadSNP4300     | <i>Desi</i>      | Ca_Desig_Chr05               | 8153755                        | (G/A)       |
| 28706       | CadSNP4301     | <i>Desi</i>      | Ca_Desig_Chr05               | 8153754                        | (T/A)       |
| 28707       | CadSNP4302     | <i>Desi</i>      | Ca_Desig_Chr05               | 8153723                        | (T/C)       |
| 28708       | CadSNP4303     | <i>Desi</i>      | Ca_Desig_Chr05               | 8153718                        | (G/A)       |
| 28709       | CadSNP4304     | <i>Desi</i>      | Ca_Desig_Chr05               | 8153714                        | (C/A)       |
| 28710       | CadSNP4305     | <i>Desi</i>      | Ca_Desig_Chr05               | 8168083                        | (G/C)       |
| 28711       | CadSNP4306     | <i>Desi</i>      | Ca_Desig_Chr05               | 8266563                        | (A/T)       |
| 28712       | CadSNP4307     | <i>Desi</i>      | Ca_Desig_Chr05               | 8266578                        | (G/A)       |
| 28713       | CadSNP4308     | <i>Desi</i>      | Ca_Desig_Chr05               | 8266619                        | (T/C)       |
| 28714       | CadSNP4309     | <i>Desi</i>      | Ca_Desig_Chr05               | 8266640                        | (G/A)       |
| 28715       | CadSNP4310     | <i>Desi</i>      | Ca_Desig_Chr05               | 8268349                        | (A/G)       |
| 28716       | CadSNP4311     | <i>Desi</i>      | Ca_Desig_Chr05               | 8275355                        | (C/T)       |
| 28717       | CadSNP4312     | <i>Desi</i>      | Ca_Desig_Chr05               | 8321845                        | (T/C)       |
| 28718       | CadSNP4313     | <i>Desi</i>      | Ca_Desig_Chr05               | 8388870                        | (C/A)       |
| 28719       | CadSNP4314     | <i>Desi</i>      | Ca_Desig_Chr05               | 8388902                        | (C/G)       |
| 28720       | CadSNP4315     | <i>Desi</i>      | Ca_Desig_Chr05               | 8388970                        | (T/A)       |
| 28721       | CadSNP4316     | <i>Desi</i>      | Ca_Desig_Chr05               | 8389021                        | (A/G)       |
| 28722       | CadSNP4317     | <i>Desi</i>      | Ca_Desig_Chr05               | 8388998                        | (C/T)       |
| 28723       | CadSNP4318     | <i>Desi</i>      | Ca_Desig_Chr05               | 8389102                        | (G/T)       |
| 28724       | CadSNP4319     | <i>Desi</i>      | Ca_Desig_Chr05               | 8389129                        | (A/G)       |
| 28725       | CadSNP4320     | <i>Desi</i>      | Ca_Desig_Chr05               | 8466711                        | (T/G)       |
| 28726       | CadSNP4321     | <i>Desi</i>      | Ca_Desig_Chr05               | 8466714                        | (A/T)       |
| 28727       | CadSNP4322     | <i>Desi</i>      | Ca_Desig_Chr05               | 8466718                        | (G/T)       |

| <b>S.N.</b> | <b>SNP IDs</b> | <b>Cultivars</b> | <b>Chromosomes/scaffolds</b> | <b>Physical positions (bp)</b> | <b>SNPs</b> |
|-------------|----------------|------------------|------------------------------|--------------------------------|-------------|
| 28728       | CadSNP4323     | <i>Desi</i>      | Ca_Desig_Chr05               | 8466743                        | (A/G)       |
| 28729       | CadSNP4324     | <i>Desi</i>      | Ca_Desig_Chr05               | 8498887                        | (C/T)       |
| 28730       | CadSNP4325     | <i>Desi</i>      | Ca_Desig_Chr05               | 8498895                        | (G/A)       |
| 28731       | CadSNP4326     | <i>Desi</i>      | Ca_Desig_Chr05               | 8511511                        | (A/G)       |
| 28732       | CadSNP4327     | <i>Desi</i>      | Ca_Desig_Chr05               | 8512193                        | (A/G)       |
| 28733       | CadSNP4328     | <i>Desi</i>      | Ca_Desig_Chr05               | 8515496                        | (A/C)       |
| 28734       | CadSNP4329     | <i>Desi</i>      | Ca_Desig_Chr05               | 8542154                        | (A/G)       |
| 28735       | CadSNP4330     | <i>Desi</i>      | Ca_Desig_Chr05               | 8545146                        | (C/G)       |
| 28736       | CadSNP4331     | <i>Desi</i>      | Ca_Desig_Chr05               | 8545379                        | (G/A)       |
| 28737       | CadSNP4332     | <i>Desi</i>      | Ca_Desig_Chr05               | 8569521                        | (G/C)       |
| 28738       | CadSNP4333     | <i>Desi</i>      | Ca_Desig_Chr05               | 8569522                        | (G/A)       |
| 28739       | CadSNP4334     | <i>Desi</i>      | Ca_Desig_Chr05               | 8569620                        | (T/G)       |
| 28740       | CadSNP4335     | <i>Desi</i>      | Ca_Desig_Chr05               | 8586426                        | (G/C)       |
| 28741       | CadSNP4336     | <i>Desi</i>      | Ca_Desig_Chr05               | 8608191                        | (C/T)       |
| 28742       | CadSNP4337     | <i>Desi</i>      | Ca_Desig_Chr05               | 8608174                        | (G/A)       |
| 28743       | CadSNP4338     | <i>Desi</i>      | Ca_Desig_Chr05               | 8627423                        | (C/T)       |
| 28744       | CadSNP4339     | <i>Desi</i>      | Ca_Desig_Chr05               | 8653433                        | (A/G)       |
| 28745       | CadSNP4340     | <i>Desi</i>      | Ca_Desig_Chr05               | 8654014                        | (A/T)       |
| 28746       | CadSNP4341     | <i>Desi</i>      | Ca_Desig_Chr05               | 8680914                        | (T/C)       |
| 28747       | CadSNP4342     | <i>Desi</i>      | Ca_Desig_Chr05               | 8681026                        | (G/A)       |
| 28748       | CadSNP4343     | <i>Desi</i>      | Ca_Desig_Chr05               | 8687007                        | (G/A)       |
| 28749       | CadSNP4344     | <i>Desi</i>      | Ca_Desig_Chr05               | 8687067                        | (T/G)       |
| 28750       | CadSNP4345     | <i>Desi</i>      | Ca_Desig_Chr05               | 8687138                        | (T/G)       |
| 28751       | CadSNP4346     | <i>Desi</i>      | Ca_Desig_Chr05               | 8728704                        | (G/A)       |
| 28752       | CadSNP4347     | <i>Desi</i>      | Ca_Desig_Chr05               | 8728764                        | (A/G)       |
| 28753       | CadSNP4348     | <i>Desi</i>      | Ca_Desig_Chr05               | 8739003                        | (A/C)       |
| 28754       | CadSNP4349     | <i>Desi</i>      | Ca_Desig_Chr05               | 8763926                        | (C/T)       |
| 28755       | CadSNP4350     | <i>Desi</i>      | Ca_Desig_Chr05               | 8785023                        | (T/C)       |
| 28756       | CadSNP4351     | <i>Desi</i>      | Ca_Desig_Chr05               | 8785100                        | (G/A)       |
| 28757       | CadSNP4352     | <i>Desi</i>      | Ca_Desig_Chr05               | 8835288                        | (G/A)       |
| 28758       | CadSNP4353     | <i>Desi</i>      | Ca_Desig_Chr05               | 8841701                        | (G/A)       |
| 28759       | CadSNP4354     | <i>Desi</i>      | Ca_Desig_Chr05               | 8842551                        | (A/G)       |
| 28760       | CadSNP4355     | <i>Desi</i>      | Ca_Desig_Chr05               | 8862976                        | (C/T)       |
| 28761       | CadSNP4356     | <i>Desi</i>      | Ca_Desig_Chr05               | 8868663                        | (C/A)       |
| 28762       | CadSNP4357     | <i>Desi</i>      | Ca_Desig_Chr05               | 8868701                        | (A/G)       |
| 28763       | CadSNP4358     | <i>Desi</i>      | Ca_Desig_Chr05               | 8868969                        | (T/C)       |
| 28764       | CadSNP4359     | <i>Desi</i>      | Ca_Desig_Chr05               | 8868976                        | (C/T)       |
| 28765       | CadSNP4360     | <i>Desi</i>      | Ca_Desig_Chr05               | 8896573                        | (G/A)       |

| <b>S.N.</b> | <b>SNP IDs</b> | <b>Cultivars</b> | <b>Chromosomes/scaffolds</b> | <b>Physical positions (bp)</b> | <b>SNPs</b> |
|-------------|----------------|------------------|------------------------------|--------------------------------|-------------|
| 28766       | CadSNP4361     | <i>Desi</i>      | Ca_Desig_Chr05               | 8906406                        | (G/T)       |
| 28767       | CadSNP4362     | <i>Desi</i>      | Ca_Desig_Chr05               | 8908414                        | (G/T)       |
| 28768       | CadSNP4363     | <i>Desi</i>      | Ca_Desig_Chr05               | 8916304                        | (G/T)       |
| 28769       | CadSNP4364     | <i>Desi</i>      | Ca_Desig_Chr05               | 8916340                        | (A/C)       |
| 28770       | CadSNP4365     | <i>Desi</i>      | Ca_Desig_Chr05               | 8944922                        | (G/T)       |
| 28771       | CadSNP4366     | <i>Desi</i>      | Ca_Desig_Chr05               | 8963777                        | (C/G)       |
| 28772       | CadSNP4367     | <i>Desi</i>      | Ca_Desig_Chr05               | 8963858                        | (A/T)       |
| 28773       | CadSNP4368     | <i>Desi</i>      | Ca_Desig_Chr05               | 8987037                        | (A/T)       |
| 28774       | CadSNP4369     | <i>Desi</i>      | Ca_Desig_Chr05               | 8987077                        | (G/T)       |
| 28775       | CadSNP4370     | <i>Desi</i>      | Ca_Desig_Chr05               | 9033815                        | (C/G)       |
| 28776       | CadSNP4371     | <i>Desi</i>      | Ca_Desig_Chr05               | 9065241                        | (A/C)       |
| 28777       | CadSNP4372     | <i>Desi</i>      | Ca_Desig_Chr05               | 9159813                        | (G/A)       |
| 28778       | CadSNP4373     | <i>Desi</i>      | Ca_Desig_Chr05               | 9159917                        | (C/T)       |
| 28779       | CadSNP4374     | <i>Desi</i>      | Ca_Desig_Chr05               | 9207462                        | (T/C)       |
| 28780       | CadSNP4375     | <i>Desi</i>      | Ca_Desig_Chr05               | 9326953                        | (C/T)       |
| 28781       | CadSNP4376     | <i>Desi</i>      | Ca_Desig_Chr05               | 9404602                        | (T/G)       |
| 28782       | CadSNP4377     | <i>Desi</i>      | Ca_Desig_Chr05               | 9438311                        | (T/A)       |
| 28783       | CadSNP4378     | <i>Desi</i>      | Ca_Desig_Chr05               | 9438767                        | (C/T)       |
| 28784       | CadSNP4379     | <i>Desi</i>      | Ca_Desig_Chr05               | 9438794                        | (T/C)       |
| 28785       | CadSNP4380     | <i>Desi</i>      | Ca_Desig_Chr05               | 9517814                        | (C/A)       |
| 28786       | CadSNP4381     | <i>Desi</i>      | Ca_Desig_Chr05               | 9517930                        | (T/G)       |
| 28787       | CadSNP4382     | <i>Desi</i>      | Ca_Desig_Chr05               | 9517914                        | (C/T)       |
| 28788       | CadSNP4383     | <i>Desi</i>      | Ca_Desig_Chr05               | 9517883                        | (C/A)       |
| 28789       | CadSNP4384     | <i>Desi</i>      | Ca_Desig_Chr05               | 9527896                        | (G/A)       |
| 28790       | CadSNP4385     | <i>Desi</i>      | Ca_Desig_Chr05               | 9550464                        | (T/G)       |
| 28791       | CadSNP4386     | <i>Desi</i>      | Ca_Desig_Chr05               | 9550503                        | (C/G)       |
| 28792       | CadSNP4387     | <i>Desi</i>      | Ca_Desig_Chr05               | 9550525                        | (A/T)       |
| 28793       | CadSNP4388     | <i>Desi</i>      | Ca_Desig_Chr05               | 9559908                        | (A/C)       |
| 28794       | CadSNP4389     | <i>Desi</i>      | Ca_Desig_Chr05               | 9562549                        | (A/C)       |
| 28795       | CadSNP4390     | <i>Desi</i>      | Ca_Desig_Chr05               | 9564908                        | (A/G)       |
| 28796       | CadSNP4391     | <i>Desi</i>      | Ca_Desig_Chr05               | 9564965                        | (T/G)       |
| 28797       | CadSNP4392     | <i>Desi</i>      | Ca_Desig_Chr05               | 9665417                        | (A/G)       |
| 28798       | CadSNP4393     | <i>Desi</i>      | Ca_Desig_Chr05               | 9666151                        | (A/C)       |
| 28799       | CadSNP4394     | <i>Desi</i>      | Ca_Desig_Chr05               | 9724582                        | (C/T)       |
| 28800       | CadSNP4395     | <i>Desi</i>      | Ca_Desig_Chr05               | 9724592                        | (T/G)       |
| 28801       | CadSNP4396     | <i>Desi</i>      | Ca_Desig_Chr05               | 9772943                        | (T/G)       |
| 28802       | CadSNP4397     | <i>Desi</i>      | Ca_Desig_Chr05               | 9806400                        | (C/G)       |
| 28803       | CadSNP4398     | <i>Desi</i>      | Ca_Desig_Chr05               | 9806433                        | (C/T)       |



| <b>S.N.</b> | <b>SNP IDs</b> | <b>Cultivars</b> | <b>Chromosomes/scaffolds</b> | <b>Physical positions (bp)</b> | <b>SNPs</b> |
|-------------|----------------|------------------|------------------------------|--------------------------------|-------------|
| 28804       | CadSNP4399     | <i>Desi</i>      | Ca_Desig_Chr05               | 9872784                        | (C/T)       |
| 28805       | CadSNP4400     | <i>Desi</i>      | Ca_Desig_Chr05               | 9872994                        | (G/A)       |
| 28806       | CadSNP4401     | <i>Desi</i>      | Ca_Desig_Chr05               | 9872975                        | (A/C)       |
| 28807       | CadSNP4402     | <i>Desi</i>      | Ca_Desig_Chr05               | 9881691                        | (C/G)       |
| 28808       | CadSNP4403     | <i>Desi</i>      | Ca_Desig_Chr05               | 9895829                        | (A/G)       |
| 28809       | CadSNP4404     | <i>Desi</i>      | Ca_Desig_Chr05               | 9907037                        | (A/G)       |
| 28810       | CadSNP4405     | <i>Desi</i>      | Ca_Desig_Chr05               | 9907155                        | (C/T)       |
| 28811       | CadSNP4406     | <i>Desi</i>      | Ca_Desig_Chr05               | 9910607                        | (G/T)       |
| 28812       | CadSNP4407     | <i>Desi</i>      | Ca_Desig_Chr05               | 9910856                        | (G/T)       |
| 28813       | CadSNP4408     | <i>Desi</i>      | Ca_Desig_Chr05               | 9946953                        | (T/G)       |
| 28814       | CadSNP4409     | <i>Desi</i>      | Ca_Desig_Chr05               | 9967382                        | (C/T)       |
| 28815       | CadSNP4410     | <i>Desi</i>      | Ca_Desig_Chr05               | 10006457                       | (G/A)       |
| 28816       | CadSNP4411     | <i>Desi</i>      | Ca_Desig_Chr05               | 10027300                       | (C/A)       |
| 28817       | CadSNP4412     | <i>Desi</i>      | Ca_Desig_Chr05               | 10070454                       | (A/G)       |
| 28818       | CadSNP4413     | <i>Desi</i>      | Ca_Desig_Chr05               | 10070571                       | (G/A)       |
| 28819       | CadSNP4414     | <i>Desi</i>      | Ca_Desig_Chr05               | 10105119                       | (C/A)       |
| 28820       | CadSNP4415     | <i>Desi</i>      | Ca_Desig_Chr05               | 10109010                       | (A/G)       |
| 28821       | CadSNP4416     | <i>Desi</i>      | Ca_Desig_Chr05               | 10111955                       | (G/A)       |
| 28822       | CadSNP4417     | <i>Desi</i>      | Ca_Desig_Chr05               | 10111964                       | (G/A)       |
| 28823       | CadSNP4418     | <i>Desi</i>      | Ca_Desig_Chr05               | 10123161                       | (T/C)       |
| 28824       | CadSNP4419     | <i>Desi</i>      | Ca_Desig_Chr05               | 10544287                       | (A/G)       |
| 28825       | CadSNP4420     | <i>Desi</i>      | Ca_Desig_Chr05               | 10544344                       | (C/T)       |
| 28826       | CadSNP4421     | <i>Desi</i>      | Ca_Desig_Chr05               | 10544279                       | (G/A)       |
| 28827       | CadSNP4422     | <i>Desi</i>      | Ca_Desig_Chr05               | 10572565                       | (T/C)       |
| 28828       | CadSNP4423     | <i>Desi</i>      | Ca_Desig_Chr05               | 10647257                       | (A/T)       |
| 28829       | CadSNP4424     | <i>Desi</i>      | Ca_Desig_Chr05               | 10664470                       | (A/C)       |
| 28830       | CadSNP4425     | <i>Desi</i>      | Ca_Desig_Chr05               | 10700655                       | (G/T)       |
| 28831       | CadSNP4426     | <i>Desi</i>      | Ca_Desig_Chr05               | 10700652                       | (T/A)       |
| 28832       | CadSNP4427     | <i>Desi</i>      | Ca_Desig_Chr05               | 10700640                       | (T/A)       |
| 28833       | CadSNP4428     | <i>Desi</i>      | Ca_Desig_Chr05               | 10700619                       | (T/C)       |
| 28834       | CadSNP4429     | <i>Desi</i>      | Ca_Desig_Chr05               | 10700610                       | (C/T)       |
| 28835       | CadSNP4430     | <i>Desi</i>      | Ca_Desig_Chr05               | 10700604                       | (T/G)       |
| 28836       | CadSNP4431     | <i>Desi</i>      | Ca_Desig_Chr05               | 10700603                       | (G/T)       |
| 28837       | CadSNP4432     | <i>Desi</i>      | Ca_Desig_Chr05               | 10700592                       | (T/A)       |
| 28838       | CadSNP4433     | <i>Desi</i>      | Ca_Desig_Chr05               | 10700591                       | (A/T)       |
| 28839       | CadSNP4434     | <i>Desi</i>      | Ca_Desig_Chr05               | 10700586                       | (T/C)       |
| 28840       | CadSNP4435     | <i>Desi</i>      | Ca_Desig_Chr05               | 10700576                       | (A/C)       |
| 28841       | CadSNP4436     | <i>Desi</i>      | Ca_Desig_Chr05               | 10737715                       | (G/A)       |

| <b>S.N.</b> | <b>SNP IDs</b> | <b>Cultivars</b> | <b>Chromosomes/scaffolds</b> | <b>Physical positions (bp)</b> | <b>SNPs</b> |
|-------------|----------------|------------------|------------------------------|--------------------------------|-------------|
| 28842       | CadSNP4437     | <i>Desi</i>      | Ca_Desig_Chr05               | 10744244                       | (C/A)       |
| 28843       | CadSNP4438     | <i>Desi</i>      | Ca_Desig_Chr05               | 10763307                       | (A/T)       |
| 28844       | CadSNP4439     | <i>Desi</i>      | Ca_Desig_Chr05               | 10763840                       | (T/C)       |
| 28845       | CadSNP4440     | <i>Desi</i>      | Ca_Desig_Chr05               | 10793547                       | (C/T)       |
| 28846       | CadSNP4441     | <i>Desi</i>      | Ca_Desig_Chr05               | 10793613                       | (G/C)       |
| 28847       | CadSNP4442     | <i>Desi</i>      | Ca_Desig_Chr05               | 10793669                       | (T/C)       |
| 28848       | CadSNP4443     | <i>Desi</i>      | Ca_Desig_Chr05               | 10853035                       | (C/T)       |
| 28849       | CadSNP4444     | <i>Desi</i>      | Ca_Desig_Chr05               | 10864037                       | (T/A)       |
| 28850       | CadSNP4445     | <i>Desi</i>      | Ca_Desig_Chr05               | 10898342                       | (A/G)       |
| 28851       | CadSNP4446     | <i>Desi</i>      | Ca_Desig_Chr05               | 10959094                       | (G/C)       |
| 28852       | CadSNP4447     | <i>Desi</i>      | Ca_Desig_Chr05               | 10994093                       | (T/A)       |
| 28853       | CadSNP4448     | <i>Desi</i>      | Ca_Desig_Chr05               | 11001170                       | (A/G)       |
| 28854       | CadSNP4449     | <i>Desi</i>      | Ca_Desig_Chr05               | 11028658                       | (C/G)       |
| 28855       | CadSNP4450     | <i>Desi</i>      | Ca_Desig_Chr05               | 11028640                       | (T/C)       |
| 28856       | CadSNP4451     | <i>Desi</i>      | Ca_Desig_Chr05               | 11028698                       | (C/A)       |
| 28857       | CadSNP4452     | <i>Desi</i>      | Ca_Desig_Chr05               | 11029152                       | (C/T)       |
| 28858       | CadSNP4453     | <i>Desi</i>      | Ca_Desig_Chr05               | 11063910                       | (C/G)       |
| 28859       | CadSNP4454     | <i>Desi</i>      | Ca_Desig_Chr05               | 11160671                       | (A/C)       |
| 28860       | CadSNP4455     | <i>Desi</i>      | Ca_Desig_Chr05               | 11160672                       | (G/C)       |
| 28861       | CadSNP4456     | <i>Desi</i>      | Ca_Desig_Chr05               | 11174148                       | (C/T)       |
| 28862       | CadSNP4457     | <i>Desi</i>      | Ca_Desig_Chr05               | 11177357                       | (C/T)       |
| 28863       | CadSNP4458     | <i>Desi</i>      | Ca_Desig_Chr05               | 11214463                       | (C/A)       |
| 28864       | CadSNP4459     | <i>Desi</i>      | Ca_Desig_Chr05               | 11335385                       | (C/T)       |
| 28865       | CadSNP4460     | <i>Desi</i>      | Ca_Desig_Chr05               | 11335354                       | (G/C)       |
| 28866       | CadSNP4461     | <i>Desi</i>      | Ca_Desig_Chr05               | 11342139                       | (C/A)       |
| 28867       | CadSNP4462     | <i>Desi</i>      | Ca_Desig_Chr05               | 11342143                       | (G/T)       |
| 28868       | CadSNP4463     | <i>Desi</i>      | Ca_Desig_Chr05               | 11342573                       | (G/C)       |
| 28869       | CadSNP4464     | <i>Desi</i>      | Ca_Desig_Chr05               | 11392823                       | (C/G)       |
| 28870       | CadSNP4465     | <i>Desi</i>      | Ca_Desig_Chr05               | 11512770                       | (T/C)       |
| 28871       | CadSNP4466     | <i>Desi</i>      | Ca_Desig_Chr05               | 11512850                       | (T/G)       |
| 28872       | CadSNP4467     | <i>Desi</i>      | Ca_Desig_Chr05               | 11537880                       | (G/A)       |
| 28873       | CadSNP4468     | <i>Desi</i>      | Ca_Desig_Chr05               | 11552774                       | (C/A)       |
| 28874       | CadSNP4469     | <i>Desi</i>      | Ca_Desig_Chr05               | 11586160                       | (C/T)       |
| 28875       | CadSNP4470     | <i>Desi</i>      | Ca_Desig_Chr05               | 11604691                       | (A/G)       |
| 28876       | CadSNP4471     | <i>Desi</i>      | Ca_Desig_Chr05               | 11604665                       | (G/A)       |
| 28877       | CadSNP4472     | <i>Desi</i>      | Ca_Desig_Chr05               | 11609467                       | (T/C)       |
| 28878       | CadSNP4473     | <i>Desi</i>      | Ca_Desig_Chr05               | 11609495                       | (T/C)       |
| 28879       | CadSNP4474     | <i>Desi</i>      | Ca_Desig_Chr05               | 11609463                       | (C/T)       |

| <b>S.N.</b> | <b>SNP IDs</b> | <b>Cultivars</b> | <b>Chromosomes/scaffolds</b> | <b>Physical positions (bp)</b> | <b>SNPs</b> |
|-------------|----------------|------------------|------------------------------|--------------------------------|-------------|
| 28880       | CadSNP4475     | <i>Desi</i>      | Ca_Desig_Chr05               | 11609837                       | (C/T)       |
| 28881       | CadSNP4476     | <i>Desi</i>      | Ca_Desig_Chr05               | 11609797                       | (A/C)       |
| 28882       | CadSNP4477     | <i>Desi</i>      | Ca_Desig_Chr05               | 11609789                       | (A/C)       |
| 28883       | CadSNP4478     | <i>Desi</i>      | Ca_Desig_Chr05               | 11609776                       | (G/A)       |
| 28884       | CadSNP4479     | <i>Desi</i>      | Ca_Desig_Chr05               | 11609771                       | (C/A)       |
| 28885       | CadSNP4480     | <i>Desi</i>      | Ca_Desig_Chr05               | 11655865                       | (C/T)       |
| 28886       | CadSNP4481     | <i>Desi</i>      | Ca_Desig_Chr05               | 11662823                       | (A/G)       |
| 28887       | CadSNP4482     | <i>Desi</i>      | Ca_Desig_Chr05               | 11752374                       | (A/T)       |
| 28888       | CadSNP4483     | <i>Desi</i>      | Ca_Desig_Chr05               | 11753758                       | (T/A)       |
| 28889       | CadSNP4484     | <i>Desi</i>      | Ca_Desig_Chr05               | 11793256                       | (T/C)       |
| 28890       | CadSNP4485     | <i>Desi</i>      | Ca_Desig_Chr05               | 11868569                       | (A/C)       |
| 28891       | CadSNP4486     | <i>Desi</i>      | Ca_Desig_Chr05               | 11872740                       | (A/C)       |
| 28892       | CadSNP4487     | <i>Desi</i>      | Ca_Desig_Chr05               | 11875453                       | (G/A)       |
| 28893       | CadSNP4488     | <i>Desi</i>      | Ca_Desig_Chr05               | 11932411                       | (A/G)       |
| 28894       | CadSNP4489     | <i>Desi</i>      | Ca_Desig_Chr05               | 11932436                       | (A/C)       |
| 28895       | CadSNP4490     | <i>Desi</i>      | Ca_Desig_Chr05               | 11959531                       | (A/C)       |
| 28896       | CadSNP4491     | <i>Desi</i>      | Ca_Desig_Chr05               | 11966950                       | (A/G)       |
| 28897       | CadSNP4492     | <i>Desi</i>      | Ca_Desig_Chr05               | 11966949                       | (A/T)       |
| 28898       | CadSNP4493     | <i>Desi</i>      | Ca_Desig_Chr05               | 11973602                       | (T/G)       |
| 28899       | CadSNP4494     | <i>Desi</i>      | Ca_Desig_Chr05               | 12098613                       | (T/C)       |
| 28900       | CadSNP4495     | <i>Desi</i>      | Ca_Desig_Chr05               | 12112846                       | (A/G)       |
| 28901       | CadSNP4496     | <i>Desi</i>      | Ca_Desig_Chr05               | 12299230                       | (G/A)       |
| 28902       | CadSNP4497     | <i>Desi</i>      | Ca_Desig_Chr05               | 12309711                       | (T/G)       |
| 28903       | CadSNP4498     | <i>Desi</i>      | Ca_Desig_Chr05               | 12406367                       | (T/C)       |
| 28904       | CadSNP4499     | <i>Desi</i>      | Ca_Desig_Chr05               | 12434400                       | (T/G)       |
| 28905       | CadSNP4500     | <i>Desi</i>      | Ca_Desig_Chr05               | 12487728                       | (T/G)       |
| 28906       | CadSNP4501     | <i>Desi</i>      | Ca_Desig_Chr05               | 12522022                       | (A/G)       |
| 28907       | CadSNP4502     | <i>Desi</i>      | Ca_Desig_Chr05               | 12526710                       | (T/A)       |
| 28908       | CadSNP4503     | <i>Desi</i>      | Ca_Desig_Chr05               | 12526833                       | (G/A)       |
| 28909       | CadSNP4504     | <i>Desi</i>      | Ca_Desig_Chr05               | 12526927                       | (T/C)       |
| 28910       | CadSNP4505     | <i>Desi</i>      | Ca_Desig_Chr05               | 12541734                       | (A/G)       |
| 28911       | CadSNP4506     | <i>Desi</i>      | Ca_Desig_Chr05               | 12602204                       | (A/C)       |
| 28912       | CadSNP4507     | <i>Desi</i>      | Ca_Desig_Chr05               | 12605247                       | (A/G)       |
| 28913       | CadSNP4508     | <i>Desi</i>      | Ca_Desig_Chr05               | 12665664                       | (G/A)       |
| 28914       | CadSNP4509     | <i>Desi</i>      | Ca_Desig_Chr05               | 12742032                       | (T/A)       |
| 28915       | CadSNP4510     | <i>Desi</i>      | Ca_Desig_Chr05               | 12742001                       | (A/C)       |
| 28916       | CadSNP4511     | <i>Desi</i>      | Ca_Desig_Chr05               | 12741968                       | (C/T)       |
| 28917       | CadSNP4512     | <i>Desi</i>      | Ca_Desig_Chr05               | 12743672                       | (G/A)       |

| <b>S.N.</b> | <b>SNP IDs</b> | <b>Cultivars</b> | <b>Chromosomes/scaffolds</b> | <b>Physical positions (bp)</b> | <b>SNPs</b> |
|-------------|----------------|------------------|------------------------------|--------------------------------|-------------|
| 28918       | CadSNP4513     | <i>Desi</i>      | Ca_Desig_Chr05               | 12743714                       | (A/G)       |
| 28919       | CadSNP4514     | <i>Desi</i>      | Ca_Desig_Chr05               | 12759540                       | (G/A)       |
| 28920       | CadSNP4515     | <i>Desi</i>      | Ca_Desig_Chr05               | 12759571                       | (A/G)       |
| 28921       | CadSNP4516     | <i>Desi</i>      | Ca_Desig_Chr05               | 12759675                       | (G/C)       |
| 28922       | CadSNP4517     | <i>Desi</i>      | Ca_Desig_Chr05               | 12759669                       | (C/T)       |
| 28923       | CadSNP4518     | <i>Desi</i>      | Ca_Desig_Chr05               | 12791587                       | (T/G)       |
| 28924       | CadSNP4519     | <i>Desi</i>      | Ca_Desig_Chr05               | 12791588                       | (T/C)       |
| 28925       | CadSNP4520     | <i>Desi</i>      | Ca_Desig_Chr05               | 12866943                       | (T/G)       |
| 28926       | CadSNP4521     | <i>Desi</i>      | Ca_Desig_Chr05               | 12893610                       | (T/G)       |
| 28927       | CadSNP4522     | <i>Desi</i>      | Ca_Desig_Chr05               | 12899200                       | (G/C)       |
| 28928       | CadSNP4523     | <i>Desi</i>      | Ca_Desig_Chr05               | 12899294                       | (C/T)       |
| 28929       | CadSNP4524     | <i>Desi</i>      | Ca_Desig_Chr05               | 12899295                       | (G/A)       |
| 28930       | CadSNP4525     | <i>Desi</i>      | Ca_Desig_Chr05               | 12899304                       | (G/A)       |
| 28931       | CadSNP4526     | <i>Desi</i>      | Ca_Desig_Chr05               | 12899329                       | (G/C)       |
| 28932       | CadSNP4527     | <i>Desi</i>      | Ca_Desig_Chr05               | 12912189                       | (T/C)       |
| 28933       | CadSNP4528     | <i>Desi</i>      | Ca_Desig_Chr05               | 12948678                       | (T/G)       |
| 28934       | CadSNP4529     | <i>Desi</i>      | Ca_Desig_Chr05               | 12948729                       | (G/A)       |
| 28935       | CadSNP4530     | <i>Desi</i>      | Ca_Desig_Chr05               | 12948716                       | (T/C)       |
| 28936       | CadSNP4531     | <i>Desi</i>      | Ca_Desig_Chr05               | 12948714                       | (G/A)       |
| 28937       | CadSNP4532     | <i>Desi</i>      | Ca_Desig_Chr05               | 12948702                       | (T/C)       |
| 28938       | CadSNP4533     | <i>Desi</i>      | Ca_Desig_Chr05               | 12955254                       | (A/C)       |
| 28939       | CadSNP4534     | <i>Desi</i>      | Ca_Desig_Chr05               | 12966290                       | (C/T)       |
| 28940       | CadSNP4535     | <i>Desi</i>      | Ca_Desig_Chr05               | 12979164                       | (C/T)       |
| 28941       | CadSNP4536     | <i>Desi</i>      | Ca_Desig_Chr05               | 12979161                       | (C/T)       |
| 28942       | CadSNP4537     | <i>Desi</i>      | Ca_Desig_Chr05               | 12979254                       | (A/G)       |
| 28943       | CadSNP4538     | <i>Desi</i>      | Ca_Desig_Chr05               | 12999192                       | (G/T)       |
| 28944       | CadSNP4539     | <i>Desi</i>      | Ca_Desig_Chr05               | 13101747                       | (G/A)       |
| 28945       | CadSNP4540     | <i>Desi</i>      | Ca_Desig_Chr05               | 13101765                       | (G/A)       |
| 28946       | CadSNP4541     | <i>Desi</i>      | Ca_Desig_Chr05               | 13122154                       | (G/A)       |
| 28947       | CadSNP4542     | <i>Desi</i>      | Ca_Desig_Chr05               | 13122172                       | (G/A)       |
| 28948       | CadSNP4543     | <i>Desi</i>      | Ca_Desig_Chr05               | 13173580                       | (G/A)       |
| 28949       | CadSNP4544     | <i>Desi</i>      | Ca_Desig_Chr05               | 13190974                       | (A/G)       |
| 28950       | CadSNP4545     | <i>Desi</i>      | Ca_Desig_Chr05               | 13190975                       | (C/G)       |
| 28951       | CadSNP4546     | <i>Desi</i>      | Ca_Desig_Chr05               | 13190987                       | (T/C)       |
| 28952       | CadSNP4547     | <i>Desi</i>      | Ca_Desig_Chr05               | 13191026                       | (T/C)       |
| 28953       | CadSNP4548     | <i>Desi</i>      | Ca_Desig_Chr05               | 13191086                       | (C/A)       |
| 28954       | CadSNP4549     | <i>Desi</i>      | Ca_Desig_Chr05               | 13191685                       | (C/T)       |
| 28955       | CadSNP4550     | <i>Desi</i>      | Ca_Desig_Chr05               | 13191966                       | (T/C)       |

| <b>S.N.</b> | <b>SNP IDs</b> | <b>Cultivars</b> | <b>Chromosomes/scaffolds</b> | <b>Physical positions (bp)</b> | <b>SNPs</b> |
|-------------|----------------|------------------|------------------------------|--------------------------------|-------------|
| 28956       | CadSNP4551     | <i>Desi</i>      | Ca_Desig_Chr05               | 13191923                       | (A/G)       |
| 28957       | CadSNP4552     | <i>Desi</i>      | Ca_Desig_Chr05               | 13192562                       | (G/A)       |
| 28958       | CadSNP4553     | <i>Desi</i>      | Ca_Desig_Chr05               | 13192535                       | (C/G)       |
| 28959       | CadSNP4554     | <i>Desi</i>      | Ca_Desig_Chr05               | 13617250                       | (T/A)       |
| 28960       | CadSNP4555     | <i>Desi</i>      | Ca_Desig_Chr05               | 13838297                       | (A/G)       |
| 28961       | CadSNP4556     | <i>Desi</i>      | Ca_Desig_Chr05               | 13838343                       | (T/A)       |
| 28962       | CadSNP4557     | <i>Desi</i>      | Ca_Desig_Chr05               | 13882694                       | (A/G)       |
| 28963       | CadSNP4558     | <i>Desi</i>      | Ca_Desig_Chr05               | 13882962                       | (A/G)       |
| 28964       | CadSNP4559     | <i>Desi</i>      | Ca_Desig_Chr05               | 13929175                       | (T/C)       |
| 28965       | CadSNP4560     | <i>Desi</i>      | Ca_Desig_Chr05               | 14006580                       | (T/C)       |
| 28966       | CadSNP4561     | <i>Desi</i>      | Ca_Desig_Chr05               | 14009263                       | (A/G)       |
| 28967       | CadSNP4562     | <i>Desi</i>      | Ca_Desig_Chr05               | 14056952                       | (T/G)       |
| 28968       | CadSNP4563     | <i>Desi</i>      | Ca_Desig_Chr05               | 14056940                       | (A/T)       |
| 28969       | CadSNP4564     | <i>Desi</i>      | Ca_Desig_Chr05               | 14056936                       | (A/T)       |
| 28970       | CadSNP4565     | <i>Desi</i>      | Ca_Desig_Chr05               | 14056929                       | (G/T)       |
| 28971       | CadSNP4566     | <i>Desi</i>      | Ca_Desig_Chr05               | 14056927                       | (C/T)       |
| 28972       | CadSNP4567     | <i>Desi</i>      | Ca_Desig_Chr05               | 14152662                       | (T/G)       |
| 28973       | CadSNP4568     | <i>Desi</i>      | Ca_Desig_Chr05               | 14154151                       | (A/G)       |
| 28974       | CadSNP4569     | <i>Desi</i>      | Ca_Desig_Chr05               | 14341251                       | (C/T)       |
| 28975       | CadSNP4570     | <i>Desi</i>      | Ca_Desig_Chr05               | 14341243                       | (A/G)       |
| 28976       | CadSNP4571     | <i>Desi</i>      | Ca_Desig_Chr05               | 14431391                       | (T/G)       |
| 28977       | CadSNP4572     | <i>Desi</i>      | Ca_Desig_Chr05               | 14496404                       | (T/C)       |
| 28978       | CadSNP4573     | <i>Desi</i>      | Ca_Desig_Chr05               | 14519569                       | (G/A)       |
| 28979       | CadSNP4574     | <i>Desi</i>      | Ca_Desig_Chr05               | 14621257                       | (G/A)       |
| 28980       | CadSNP4575     | <i>Desi</i>      | Ca_Desig_Chr05               | 14621349                       | (C/G)       |
| 28981       | CadSNP4576     | <i>Desi</i>      | Ca_Desig_Chr05               | 14621724                       | (A/C)       |
| 28982       | CadSNP4577     | <i>Desi</i>      | Ca_Desig_Chr05               | 14845884                       | (C/T)       |
| 28983       | CadSNP4578     | <i>Desi</i>      | Ca_Desig_Chr05               | 14856249                       | (C/A)       |
| 28984       | CadSNP4579     | <i>Desi</i>      | Ca_Desig_Chr05               | 14963006                       | (A/G)       |
| 28985       | CadSNP4580     | <i>Desi</i>      | Ca_Desig_Chr05               | 15194217                       | (T/C)       |
| 28986       | CadSNP4581     | <i>Desi</i>      | Ca_Desig_Chr05               | 15194230                       | (C/T)       |
| 28987       | CadSNP4582     | <i>Desi</i>      | Ca_Desig_Chr05               | 15197106                       | (G/C)       |
| 28988       | CadSNP4583     | <i>Desi</i>      | Ca_Desig_Chr05               | 15198485                       | (T/C)       |
| 28989       | CadSNP4584     | <i>Desi</i>      | Ca_Desig_Chr05               | 15239781                       | (G/C)       |
| 28990       | CadSNP4585     | <i>Desi</i>      | Ca_Desig_Chr05               | 15239787                       | (T/C)       |
| 28991       | CadSNP4586     | <i>Desi</i>      | Ca_Desig_Chr05               | 15239824                       | (A/T)       |
| 28992       | CadSNP4587     | <i>Desi</i>      | Ca_Desig_Chr05               | 15284589                       | (A/C)       |
| 28993       | CadSNP4588     | <i>Desi</i>      | Ca_Desig_Chr05               | 15284798                       | (A/G)       |

| <b>S.N.</b> | <b>SNP IDs</b> | <b>Cultivars</b> | <b>Chromosomes/scaffolds</b> | <b>Physical positions (bp)</b> | <b>SNPs</b> |
|-------------|----------------|------------------|------------------------------|--------------------------------|-------------|
| 28994       | CadSNP4589     | <i>Desi</i>      | Ca_Desig_Chr05               | 15366596                       | (G/T)       |
| 28995       | CadSNP4590     | <i>Desi</i>      | Ca_Desig_Chr05               | 15418559                       | (A/T)       |
| 28996       | CadSNP4591     | <i>Desi</i>      | Ca_Desig_Chr05               | 15418577                       | (T/C)       |
| 28997       | CadSNP4592     | <i>Desi</i>      | Ca_Desig_Chr05               | 15418670                       | (T/A)       |
| 28998       | CadSNP4593     | <i>Desi</i>      | Ca_Desig_Chr05               | 15497565                       | (T/G)       |
| 28999       | CadSNP4594     | <i>Desi</i>      | Ca_Desig_Chr05               | 15509360                       | (A/G)       |
| 29000       | CadSNP4595     | <i>Desi</i>      | Ca_Desig_Chr05               | 15609057                       | (T/G)       |
| 29001       | CadSNP4596     | <i>Desi</i>      | Ca_Desig_Chr05               | 15990322                       | (C/T)       |
| 29002       | CadSNP4597     | <i>Desi</i>      | Ca_Desig_Chr05               | 15990356                       | (G/A)       |
| 29003       | CadSNP4598     | <i>Desi</i>      | Ca_Desig_Chr05               | 15990348                       | (T/A)       |
| 29004       | CadSNP4599     | <i>Desi</i>      | Ca_Desig_Chr05               | 15990337                       | (T/C)       |
| 29005       | CadSNP4600     | <i>Desi</i>      | Ca_Desig_Chr05               | 15990336                       | (A/G)       |
| 29006       | CadSNP4601     | <i>Desi</i>      | Ca_Desig_Chr05               | 15990424                       | (G/A)       |
| 29007       | CadSNP4602     | <i>Desi</i>      | Ca_Desig_Chr05               | 15990523                       | (A/G)       |
| 29008       | CadSNP4603     | <i>Desi</i>      | Ca_Desig_Chr05               | 15990517                       | (T/C)       |
| 29009       | CadSNP4604     | <i>Desi</i>      | Ca_Desig_Chr05               | 15990512                       | (C/A)       |
| 29010       | CadSNP4605     | <i>Desi</i>      | Ca_Desig_Chr05               | 15990510                       | (C/T)       |
| 29011       | CadSNP4606     | <i>Desi</i>      | Ca_Desig_Chr05               | 15990478                       | (G/A)       |
| 29012       | CadSNP4607     | <i>Desi</i>      | Ca_Desig_Chr05               | 15990463                       | (C/T)       |
| 29013       | CadSNP4608     | <i>Desi</i>      | Ca_Desig_Chr05               | 15990703                       | (G/A)       |
| 29014       | CadSNP4609     | <i>Desi</i>      | Ca_Desig_Chr05               | 16046569                       | (A/G)       |
| 29015       | CadSNP4610     | <i>Desi</i>      | Ca_Desig_Chr05               | 16046672                       | (T/C)       |
| 29016       | CadSNP4611     | <i>Desi</i>      | Ca_Desig_Chr05               | 16078287                       | (G/T)       |
| 29017       | CadSNP4612     | <i>Desi</i>      | Ca_Desig_Chr05               | 16078969                       | (G/C)       |
| 29018       | CadSNP4613     | <i>Desi</i>      | Ca_Desig_Chr05               | 16137753                       | (G/A)       |
| 29019       | CadSNP4614     | <i>Desi</i>      | Ca_Desig_Chr05               | 16137774                       | (C/G)       |
| 29020       | CadSNP4615     | <i>Desi</i>      | Ca_Desig_Chr05               | 16137828                       | (C/T)       |
| 29021       | CadSNP4616     | <i>Desi</i>      | Ca_Desig_Chr05               | 16170840                       | (A/G)       |
| 29022       | CadSNP4617     | <i>Desi</i>      | Ca_Desig_Chr05               | 16170950                       | (G/C)       |
| 29023       | CadSNP4618     | <i>Desi</i>      | Ca_Desig_Chr05               | 16170918                       | (G/T)       |
| 29024       | CadSNP4619     | <i>Desi</i>      | Ca_Desig_Chr05               | 16170903                       | (A/C)       |
| 29025       | CadSNP4620     | <i>Desi</i>      | Ca_Desig_Chr06               | 708119                         | (C/T)       |
| 29026       | CadSNP4621     | <i>Desi</i>      | Ca_Desig_Chr06               | 710250                         | (G/A)       |
| 29027       | CadSNP4622     | <i>Desi</i>      | Ca_Desig_Chr06               | 711791                         | (A/G)       |
| 29028       | CadSNP4623     | <i>Desi</i>      | Ca_Desig_Chr06               | 711778                         | (A/G)       |
| 29029       | CadSNP4624     | <i>Desi</i>      | Ca_Desig_Chr06               | 759589                         | (A/G)       |
| 29030       | CadSNP4625     | <i>Desi</i>      | Ca_Desig_Chr06               | 760619                         | (A/T)       |
| 29031       | CadSNP4626     | <i>Desi</i>      | Ca_Desig_Chr06               | 760620                         | (A/T)       |

| <b>S.N.</b> | <b>SNP IDs</b> | <b>Cultivars</b> | <b>Chromosomes/scaffolds</b> | <b>Physical positions (bp)</b> | <b>SNPs</b> |
|-------------|----------------|------------------|------------------------------|--------------------------------|-------------|
| 29032       | CadSNP4627     | <i>Desi</i>      | Ca_Desig_Chr06               | 784235                         | (G/A)       |
| 29033       | CadSNP4628     | <i>Desi</i>      | Ca_Desig_Chr06               | 785583                         | (C/G)       |
| 29034       | CadSNP4629     | <i>Desi</i>      | Ca_Desig_Chr06               | 816797                         | (C/A)       |
| 29035       | CadSNP4630     | <i>Desi</i>      | Ca_Desig_Chr06               | 816771                         | (G/A)       |
| 29036       | CadSNP4631     | <i>Desi</i>      | Ca_Desig_Chr06               | 834868                         | (T/G)       |
| 29037       | CadSNP4632     | <i>Desi</i>      | Ca_Desig_Chr06               | 852455                         | (C/T)       |
| 29038       | CadSNP4633     | <i>Desi</i>      | Ca_Desig_Chr06               | 857710                         | (T/C)       |
| 29039       | CadSNP4634     | <i>Desi</i>      | Ca_Desig_Chr06               | 860759                         | (T/C)       |
| 29040       | CadSNP4635     | <i>Desi</i>      | Ca_Desig_Chr06               | 872274                         | (C/T)       |
| 29041       | CadSNP4636     | <i>Desi</i>      | Ca_Desig_Chr06               | 1399497                        | (T/G)       |
| 29042       | CadSNP4637     | <i>Desi</i>      | Ca_Desig_Chr06               | 1399543                        | (T/C)       |
| 29043       | CadSNP4638     | <i>Desi</i>      | Ca_Desig_Chr06               | 1400882                        | (A/G)       |
| 29044       | CadSNP4639     | <i>Desi</i>      | Ca_Desig_Chr06               | 1404542                        | (T/C)       |
| 29045       | CadSNP4640     | <i>Desi</i>      | Ca_Desig_Chr06               | 1404737                        | (A/G)       |
| 29046       | CadSNP4641     | <i>Desi</i>      | Ca_Desig_Chr06               | 1404719                        | (A/G)       |
| 29047       | CadSNP4642     | <i>Desi</i>      | Ca_Desig_Chr06               | 1404782                        | (C/T)       |
| 29048       | CadSNP4643     | <i>Desi</i>      | Ca_Desig_Chr06               | 1404833                        | (T/A)       |
| 29049       | CadSNP4644     | <i>Desi</i>      | Ca_Desig_Chr06               | 1405172                        | (A/G)       |
| 29050       | CadSNP4645     | <i>Desi</i>      | Ca_Desig_Chr06               | 1428933                        | (T/C)       |
| 29051       | CadSNP4646     | <i>Desi</i>      | Ca_Desig_Chr06               | 1428988                        | (T/C)       |
| 29052       | CadSNP4647     | <i>Desi</i>      | Ca_Desig_Chr06               | 1447426                        | (A/C)       |
| 29053       | CadSNP4648     | <i>Desi</i>      | Ca_Desig_Chr06               | 1498286                        | (A/C)       |
| 29054       | CadSNP4649     | <i>Desi</i>      | Ca_Desig_Chr06               | 1498258                        | (C/G)       |
| 29055       | CadSNP4650     | <i>Desi</i>      | Ca_Desig_Chr06               | 1530871                        | (C/G)       |
| 29056       | CadSNP4651     | <i>Desi</i>      | Ca_Desig_Chr06               | 1530915                        | (G/T)       |
| 29057       | CadSNP4652     | <i>Desi</i>      | Ca_Desig_Chr06               | 1530925                        | (C/G)       |
| 29058       | CadSNP4653     | <i>Desi</i>      | Ca_Desig_Chr06               | 1669530                        | (A/G)       |
| 29059       | CadSNP4654     | <i>Desi</i>      | Ca_Desig_Chr06               | 1671647                        | (T/G)       |
| 29060       | CadSNP4655     | <i>Desi</i>      | Ca_Desig_Chr06               | 1720438                        | (C/T)       |
| 29061       | CadSNP4656     | <i>Desi</i>      | Ca_Desig_Chr06               | 1768057                        | (T/G)       |
| 29062       | CadSNP4657     | <i>Desi</i>      | Ca_Desig_Chr06               | 1778613                        | (A/G)       |
| 29063       | CadSNP4658     | <i>Desi</i>      | Ca_Desig_Chr06               | 1878318                        | (C/A)       |
| 29064       | CadSNP4659     | <i>Desi</i>      | Ca_Desig_Chr06               | 1909507                        | (T/C)       |
| 29065       | CadSNP4660     | <i>Desi</i>      | Ca_Desig_Chr06               | 1918526                        | (T/G)       |
| 29066       | CadSNP4661     | <i>Desi</i>      | Ca_Desig_Chr06               | 1949577                        | (A/T)       |
| 29067       | CadSNP4662     | <i>Desi</i>      | Ca_Desig_Chr06               | 1952238                        | (T/G)       |
| 29068       | CadSNP4663     | <i>Desi</i>      | Ca_Desig_Chr06               | 1962394                        | (A/G)       |
| 29069       | CadSNP4664     | <i>Desi</i>      | Ca_Desig_Chr06               | 1982038                        | (G/C)       |

| <b>S.N.</b> | <b>SNP IDs</b> | <b>Cultivars</b> | <b>Chromosomes/scaffolds</b> | <b>Physical positions (bp)</b> | <b>SNPs</b> |
|-------------|----------------|------------------|------------------------------|--------------------------------|-------------|
| 29070       | CadSNP4665     | <i>Desi</i>      | Ca_Desig_Chr06               | 1990006                        | (C/A)       |
| 29071       | CadSNP4666     | <i>Desi</i>      | Ca_Desig_Chr06               | 2046962                        | (T/A)       |
| 29072       | CadSNP4667     | <i>Desi</i>      | Ca_Desig_Chr06               | 2053478                        | (G/T)       |
| 29073       | CadSNP4668     | <i>Desi</i>      | Ca_Desig_Chr06               | 2053469                        | (G/T)       |
| 29074       | CadSNP4669     | <i>Desi</i>      | Ca_Desig_Chr06               | 2055044                        | (A/C)       |
| 29075       | CadSNP4670     | <i>Desi</i>      | Ca_Desig_Chr06               | 2181824                        | (G/A)       |
| 29076       | CadSNP4671     | <i>Desi</i>      | Ca_Desig_Chr06               | 2304901                        | (A/T)       |
| 29077       | CadSNP4672     | <i>Desi</i>      | Ca_Desig_Chr06               | 2341500                        | (G/A)       |
| 29078       | CadSNP4673     | <i>Desi</i>      | Ca_Desig_Chr06               | 2341572                        | (A/T)       |
| 29079       | CadSNP4674     | <i>Desi</i>      | Ca_Desig_Chr06               | 2341653                        | (G/A)       |
| 29080       | CadSNP4675     | <i>Desi</i>      | Ca_Desig_Chr06               | 2354039                        | (G/T)       |
| 29081       | CadSNP4676     | <i>Desi</i>      | Ca_Desig_Chr06               | 2401832                        | (A/G)       |
| 29082       | CadSNP4677     | <i>Desi</i>      | Ca_Desig_Chr06               | 2401831                        | (C/T)       |
| 29083       | CadSNP4678     | <i>Desi</i>      | Ca_Desig_Chr06               | 2409313                        | (T/C)       |
| 29084       | CadSNP4679     | <i>Desi</i>      | Ca_Desig_Chr06               | 2456442                        | (G/C)       |
| 29085       | CadSNP4680     | <i>Desi</i>      | Ca_Desig_Chr06               | 2596358                        | (T/C)       |
| 29086       | CadSNP4681     | <i>Desi</i>      | Ca_Desig_Chr06               | 2596296                        | (T/C)       |
| 29087       | CadSNP4682     | <i>Desi</i>      | Ca_Desig_Chr06               | 2609813                        | (T/C)       |
| 29088       | CadSNP4683     | <i>Desi</i>      | Ca_Desig_Chr06               | 2609808                        | (A/C)       |
| 29089       | CadSNP4684     | <i>Desi</i>      | Ca_Desig_Chr06               | 2615000                        | (C/T)       |
| 29090       | CadSNP4685     | <i>Desi</i>      | Ca_Desig_Chr06               | 2615009                        | (G/A)       |
| 29091       | CadSNP4686     | <i>Desi</i>      | Ca_Desig_Chr06               | 2615011                        | (A/C)       |
| 29092       | CadSNP4687     | <i>Desi</i>      | Ca_Desig_Chr06               | 2615019                        | (A/T)       |
| 29093       | CadSNP4688     | <i>Desi</i>      | Ca_Desig_Chr06               | 2615054                        | (T/A)       |
| 29094       | CadSNP4689     | <i>Desi</i>      | Ca_Desig_Chr06               | 2615048                        | (A/G)       |
| 29095       | CadSNP4690     | <i>Desi</i>      | Ca_Desig_Chr06               | 2697953                        | (A/G)       |
| 29096       | CadSNP4691     | <i>Desi</i>      | Ca_Desig_Chr06               | 2697972                        | (G/A)       |
| 29097       | CadSNP4692     | <i>Desi</i>      | Ca_Desig_Chr06               | 2698001                        | (A/G)       |
| 29098       | CadSNP4693     | <i>Desi</i>      | Ca_Desig_Chr06               | 2703180                        | (T/A)       |
| 29099       | CadSNP4694     | <i>Desi</i>      | Ca_Desig_Chr06               | 2703198                        | (A/G)       |
| 29100       | CadSNP4695     | <i>Desi</i>      | Ca_Desig_Chr06               | 2708651                        | (A/G)       |
| 29101       | CadSNP4696     | <i>Desi</i>      | Ca_Desig_Chr06               | 2708683                        | (C/T)       |
| 29102       | CadSNP4697     | <i>Desi</i>      | Ca_Desig_Chr06               | 2716533                        | (T/G)       |
| 29103       | CadSNP4698     | <i>Desi</i>      | Ca_Desig_Chr06               | 2721201                        | (A/C)       |
| 29104       | CadSNP4699     | <i>Desi</i>      | Ca_Desig_Chr06               | 2721202                        | (G/T)       |
| 29105       | CadSNP4700     | <i>Desi</i>      | Ca_Desig_Chr06               | 2721205                        | (A/C)       |
| 29106       | CadSNP4701     | <i>Desi</i>      | Ca_Desig_Chr06               | 2721210                        | (G/T)       |
| 29107       | CadSNP4702     | <i>Desi</i>      | Ca_Desig_Chr06               | 2721217                        | (A/G)       |



| <b>S.N.</b> | <b>SNP IDs</b> | <b>Cultivars</b> | <b>Chromosomes/scaffolds</b> | <b>Physical positions (bp)</b> | <b>SNPs</b> |
|-------------|----------------|------------------|------------------------------|--------------------------------|-------------|
| 29108       | CadSNP4703     | <i>Desi</i>      | Ca_Desig_Chr06               | 2721220                        | (G/T)       |
| 29109       | CadSNP4704     | <i>Desi</i>      | Ca_Desig_Chr06               | 2721229                        | (A/G)       |
| 29110       | CadSNP4705     | <i>Desi</i>      | Ca_Desig_Chr06               | 2721236                        | (C/T)       |
| 29111       | CadSNP4706     | <i>Desi</i>      | Ca_Desig_Chr06               | 2721244                        | (A/T)       |
| 29112       | CadSNP4707     | <i>Desi</i>      | Ca_Desig_Chr06               | 2724389                        | (T/G)       |
| 29113       | CadSNP4708     | <i>Desi</i>      | Ca_Desig_Chr06               | 2734949                        | (A/C)       |
| 29114       | CadSNP4709     | <i>Desi</i>      | Ca_Desig_Chr06               | 2735094                        | (G/A)       |
| 29115       | CadSNP4710     | <i>Desi</i>      | Ca_Desig_Chr06               | 2735295                        | (T/C)       |
| 29116       | CadSNP4711     | <i>Desi</i>      | Ca_Desig_Chr06               | 2771663                        | (T/C)       |
| 29117       | CadSNP4712     | <i>Desi</i>      | Ca_Desig_Chr06               | 2840081                        | (T/C)       |
| 29118       | CadSNP4713     | <i>Desi</i>      | Ca_Desig_Chr06               | 2963977                        | (A/G)       |
| 29119       | CadSNP4714     | <i>Desi</i>      | Ca_Desig_Chr06               | 3289141                        | (T/C)       |
| 29120       | CadSNP4715     | <i>Desi</i>      | Ca_Desig_Chr06               | 3295359                        | (A/T)       |
| 29121       | CadSNP4716     | <i>Desi</i>      | Ca_Desig_Chr06               | 3295404                        | (A/C)       |
| 29122       | CadSNP4717     | <i>Desi</i>      | Ca_Desig_Chr06               | 3295426                        | (A/C)       |
| 29123       | CadSNP4718     | <i>Desi</i>      | Ca_Desig_Chr06               | 3385728                        | (T/C)       |
| 29124       | CadSNP4719     | <i>Desi</i>      | Ca_Desig_Chr06               | 3385816                        | (G/A)       |
| 29125       | CadSNP4720     | <i>Desi</i>      | Ca_Desig_Chr06               | 3386976                        | (C/T)       |
| 29126       | CadSNP4721     | <i>Desi</i>      | Ca_Desig_Chr06               | 3392258                        | (G/A)       |
| 29127       | CadSNP4722     | <i>Desi</i>      | Ca_Desig_Chr06               | 3398484                        | (A/T)       |
| 29128       | CadSNP4723     | <i>Desi</i>      | Ca_Desig_Chr06               | 3398461                        | (C/T)       |
| 29129       | CadSNP4724     | <i>Desi</i>      | Ca_Desig_Chr06               | 3422528                        | (C/A)       |
| 29130       | CadSNP4725     | <i>Desi</i>      | Ca_Desig_Chr06               | 3437552                        | (C/T)       |
| 29131       | CadSNP4726     | <i>Desi</i>      | Ca_Desig_Chr06               | 3439444                        | (C/T)       |
| 29132       | CadSNP4727     | <i>Desi</i>      | Ca_Desig_Chr06               | 3439565                        | (A/G)       |
| 29133       | CadSNP4728     | <i>Desi</i>      | Ca_Desig_Chr06               | 3443517                        | (C/G)       |
| 29134       | CadSNP4729     | <i>Desi</i>      | Ca_Desig_Chr06               | 3509247                        | (T/C)       |
| 29135       | CadSNP4730     | <i>Desi</i>      | Ca_Desig_Chr06               | 3551024                        | (C/T)       |
| 29136       | CadSNP4731     | <i>Desi</i>      | Ca_Desig_Chr06               | 3551113                        | (C/T)       |
| 29137       | CadSNP4732     | <i>Desi</i>      | Ca_Desig_Chr06               | 3629257                        | (G/T)       |
| 29138       | CadSNP4733     | <i>Desi</i>      | Ca_Desig_Chr06               | 3629260                        | (A/T)       |
| 29139       | CadSNP4734     | <i>Desi</i>      | Ca_Desig_Chr06               | 3629275                        | (C/T)       |
| 29140       | CadSNP4735     | <i>Desi</i>      | Ca_Desig_Chr06               | 3629293                        | (A/T)       |
| 29141       | CadSNP4736     | <i>Desi</i>      | Ca_Desig_Chr06               | 3629296                        | (A/T)       |
| 29142       | CadSNP4737     | <i>Desi</i>      | Ca_Desig_Chr06               | 3636801                        | (T/G)       |
| 29143       | CadSNP4738     | <i>Desi</i>      | Ca_Desig_Chr06               | 3771449                        | (C/T)       |
| 29144       | CadSNP4739     | <i>Desi</i>      | Ca_Desig_Chr06               | 3777690                        | (A/G)       |
| 29145       | CadSNP4740     | <i>Desi</i>      | Ca_Desig_Chr06               | 3777646                        | (T/C)       |

| <b>S.N.</b> | <b>SNP IDs</b> | <b>Cultivars</b> | <b>Chromosomes/scaffolds</b> | <b>Physical positions (bp)</b> | <b>SNPs</b> |
|-------------|----------------|------------------|------------------------------|--------------------------------|-------------|
| 29146       | CadSNP4741     | <i>Desi</i>      | Ca_Desig_Chr06               | 3778037                        | (G/A)       |
| 29147       | CadSNP4742     | <i>Desi</i>      | Ca_Desig_Chr06               | 3780661                        | (G/A)       |
| 29148       | CadSNP4743     | <i>Desi</i>      | Ca_Desig_Chr06               | 3780628                        | (T/C)       |
| 29149       | CadSNP4744     | <i>Desi</i>      | Ca_Desig_Chr06               | 3781556                        | (T/G)       |
| 29150       | CadSNP4745     | <i>Desi</i>      | Ca_Desig_Chr06               | 3781552                        | (C/A)       |
| 29151       | CadSNP4746     | <i>Desi</i>      | Ca_Desig_Chr06               | 3781548                        | (T/G)       |
| 29152       | CadSNP4747     | <i>Desi</i>      | Ca_Desig_Chr06               | 3797242                        | (T/C)       |
| 29153       | CadSNP4748     | <i>Desi</i>      | Ca_Desig_Chr06               | 3912452                        | (T/G)       |
| 29154       | CadSNP4749     | <i>Desi</i>      | Ca_Desig_Chr06               | 3912467                        | (T/C)       |
| 29155       | CadSNP4750     | <i>Desi</i>      | Ca_Desig_Chr06               | 3913889                        | (G/A)       |
| 29156       | CadSNP4751     | <i>Desi</i>      | Ca_Desig_Chr06               | 3913907                        | (A/G)       |
| 29157       | CadSNP4752     | <i>Desi</i>      | Ca_Desig_Chr06               | 3953348                        | (T/C)       |
| 29158       | CadSNP4753     | <i>Desi</i>      | Ca_Desig_Chr06               | 3953946                        | (A/C)       |
| 29159       | CadSNP4754     | <i>Desi</i>      | Ca_Desig_Chr06               | 3953957                        | (T/G)       |
| 29160       | CadSNP4755     | <i>Desi</i>      | Ca_Desig_Chr06               | 3953982                        | (G/T)       |
| 29161       | CadSNP4756     | <i>Desi</i>      | Ca_Desig_Chr06               | 3953995                        | (A/C)       |
| 29162       | CadSNP4757     | <i>Desi</i>      | Ca_Desig_Chr06               | 3954096                        | (A/G)       |
| 29163       | CadSNP4758     | <i>Desi</i>      | Ca_Desig_Chr06               | 3955621                        | (A/G)       |
| 29164       | CadSNP4759     | <i>Desi</i>      | Ca_Desig_Chr06               | 3955666                        | (G/A)       |
| 29165       | CadSNP4760     | <i>Desi</i>      | Ca_Desig_Chr06               | 3955672                        | (A/G)       |
| 29166       | CadSNP4761     | <i>Desi</i>      | Ca_Desig_Chr06               | 3956770                        | (G/A)       |
| 29167       | CadSNP4762     | <i>Desi</i>      | Ca_Desig_Chr06               | 3958738                        | (A/G)       |
| 29168       | CadSNP4763     | <i>Desi</i>      | Ca_Desig_Chr06               | 3958739                        | (G/C)       |
| 29169       | CadSNP4764     | <i>Desi</i>      | Ca_Desig_Chr06               | 3958854                        | (C/T)       |
| 29170       | CadSNP4765     | <i>Desi</i>      | Ca_Desig_Chr06               | 3958870                        | (G/T)       |
| 29171       | CadSNP4766     | <i>Desi</i>      | Ca_Desig_Chr06               | 3958901                        | (C/T)       |
| 29172       | CadSNP4767     | <i>Desi</i>      | Ca_Desig_Chr06               | 3960118                        | (A/G)       |
| 29173       | CadSNP4768     | <i>Desi</i>      | Ca_Desig_Chr06               | 3960162                        | (C/G)       |
| 29174       | CadSNP4769     | <i>Desi</i>      | Ca_Desig_Chr06               | 3960216                        | (T/C)       |
| 29175       | CadSNP4770     | <i>Desi</i>      | Ca_Desig_Chr06               | 3966763                        | (T/G)       |
| 29176       | CadSNP4771     | <i>Desi</i>      | Ca_Desig_Chr06               | 4022210                        | (C/T)       |
| 29177       | CadSNP4772     | <i>Desi</i>      | Ca_Desig_Chr06               | 4039489                        | (G/A)       |
| 29178       | CadSNP4773     | <i>Desi</i>      | Ca_Desig_Chr06               | 4039522                        | (A/G)       |
| 29179       | CadSNP4774     | <i>Desi</i>      | Ca_Desig_Chr06               | 4063699                        | (C/A)       |
| 29180       | CadSNP4775     | <i>Desi</i>      | Ca_Desig_Chr06               | 4072292                        | (C/T)       |
| 29181       | CadSNP4776     | <i>Desi</i>      | Ca_Desig_Chr06               | 4072742                        | (T/G)       |
| 29182       | CadSNP4777     | <i>Desi</i>      | Ca_Desig_Chr06               | 4072817                        | (C/T)       |
| 29183       | CadSNP4778     | <i>Desi</i>      | Ca_Desig_Chr06               | 4074191                        | (T/C)       |

| <b>S.N.</b> | <b>SNP IDs</b> | <b>Cultivars</b> | <b>Chromosomes/scaffolds</b> | <b>Physical positions (bp)</b> | <b>SNPs</b> |
|-------------|----------------|------------------|------------------------------|--------------------------------|-------------|
| 29184       | CadSNP4779     | <i>Desi</i>      | Ca_Desig_Chr06               | 4082237                        | (G/T)       |
| 29185       | CadSNP4780     | <i>Desi</i>      | Ca_Desig_Chr06               | 4107311                        | (T/C)       |
| 29186       | CadSNP4781     | <i>Desi</i>      | Ca_Desig_Chr06               | 4142257                        | (C/T)       |
| 29187       | CadSNP4782     | <i>Desi</i>      | Ca_Desig_Chr06               | 4142658                        | (A/G)       |
| 29188       | CadSNP4783     | <i>Desi</i>      | Ca_Desig_Chr06               | 4142677                        | (T/C)       |
| 29189       | CadSNP4784     | <i>Desi</i>      | Ca_Desig_Chr06               | 4142812                        | (T/C)       |
| 29190       | CadSNP4785     | <i>Desi</i>      | Ca_Desig_Chr06               | 4231750                        | (A/G)       |
| 29191       | CadSNP4786     | <i>Desi</i>      | Ca_Desig_Chr06               | 4276964                        | (T/C)       |
| 29192       | CadSNP4787     | <i>Desi</i>      | Ca_Desig_Chr06               | 4310476                        | (C/T)       |
| 29193       | CadSNP4788     | <i>Desi</i>      | Ca_Desig_Chr06               | 4310498                        | (C/T)       |
| 29194       | CadSNP4789     | <i>Desi</i>      | Ca_Desig_Chr06               | 4310528                        | (G/A)       |
| 29195       | CadSNP4790     | <i>Desi</i>      | Ca_Desig_Chr06               | 4310593                        | (G/A)       |
| 29196       | CadSNP4791     | <i>Desi</i>      | Ca_Desig_Chr06               | 4358705                        | (C/A)       |
| 29197       | CadSNP4792     | <i>Desi</i>      | Ca_Desig_Chr06               | 4464467                        | (T/C)       |
| 29198       | CadSNP4793     | <i>Desi</i>      | Ca_Desig_Chr06               | 4538900                        | (G/A)       |
| 29199       | CadSNP4794     | <i>Desi</i>      | Ca_Desig_Chr06               | 4553439                        | (G/C)       |
| 29200       | CadSNP4795     | <i>Desi</i>      | Ca_Desig_Chr06               | 4554274                        | (C/T)       |
| 29201       | CadSNP4796     | <i>Desi</i>      | Ca_Desig_Chr06               | 4576604                        | (T/A)       |
| 29202       | CadSNP4797     | <i>Desi</i>      | Ca_Desig_Chr06               | 4576598                        | (T/C)       |
| 29203       | CadSNP4798     | <i>Desi</i>      | Ca_Desig_Chr06               | 4576595                        | (C/A)       |
| 29204       | CadSNP4799     | <i>Desi</i>      | Ca_Desig_Chr06               | 4587162                        | (T/C)       |
| 29205       | CadSNP4800     | <i>Desi</i>      | Ca_Desig_Chr06               | 4641974                        | (A/G)       |
| 29206       | CadSNP4801     | <i>Desi</i>      | Ca_Desig_Chr06               | 4646365                        | (G/A)       |
| 29207       | CadSNP4802     | <i>Desi</i>      | Ca_Desig_Chr06               | 4646368                        | (G/A)       |
| 29208       | CadSNP4803     | <i>Desi</i>      | Ca_Desig_Chr06               | 4646393                        | (A/C)       |
| 29209       | CadSNP4804     | <i>Desi</i>      | Ca_Desig_Chr06               | 4646391                        | (A/C)       |
| 29210       | CadSNP4805     | <i>Desi</i>      | Ca_Desig_Chr06               | 4646384                        | (A/C)       |
| 29211       | CadSNP4806     | <i>Desi</i>      | Ca_Desig_Chr06               | 4651094                        | (A/G)       |
| 29212       | CadSNP4807     | <i>Desi</i>      | Ca_Desig_Chr06               | 4651118                        | (C/T)       |
| 29213       | CadSNP4808     | <i>Desi</i>      | Ca_Desig_Chr06               | 4669923                        | (A/C)       |
| 29214       | CadSNP4809     | <i>Desi</i>      | Ca_Desig_Chr06               | 4672284                        | (T/C)       |
| 29215       | CadSNP4810     | <i>Desi</i>      | Ca_Desig_Chr06               | 4691086                        | (T/C)       |
| 29216       | CadSNP4811     | <i>Desi</i>      | Ca_Desig_Chr06               | 4730982                        | (A/G)       |
| 29217       | CadSNP4812     | <i>Desi</i>      | Ca_Desig_Chr06               | 4731554                        | (G/A)       |
| 29218       | CadSNP4813     | <i>Desi</i>      | Ca_Desig_Chr06               | 4733447                        | (G/A)       |
| 29219       | CadSNP4814     | <i>Desi</i>      | Ca_Desig_Chr06               | 4775756                        | (C/T)       |
| 29220       | CadSNP4815     | <i>Desi</i>      | Ca_Desig_Chr06               | 4790073                        | (A/T)       |
| 29221       | CadSNP4816     | <i>Desi</i>      | Ca_Desig_Chr06               | 4790077                        | (G/A)       |

| <b>S.N.</b> | <b>SNP IDs</b> | <b>Cultivars</b> | <b>Chromosomes/scaffolds</b> | <b>Physical positions (bp)</b> | <b>SNPs</b> |
|-------------|----------------|------------------|------------------------------|--------------------------------|-------------|
| 29222       | CadSNP4817     | <i>Desi</i>      | Ca_Desig_Chr06               | 4790205                        | (T/G)       |
| 29223       | CadSNP4818     | <i>Desi</i>      | Ca_Desig_Chr06               | 4792734                        | (G/A)       |
| 29224       | CadSNP4819     | <i>Desi</i>      | Ca_Desig_Chr06               | 4792759                        | (G/A)       |
| 29225       | CadSNP4820     | <i>Desi</i>      | Ca_Desig_Chr06               | 4792800                        | (G/A)       |
| 29226       | CadSNP4821     | <i>Desi</i>      | Ca_Desig_Chr06               | 4792803                        | (A/C)       |
| 29227       | CadSNP4822     | <i>Desi</i>      | Ca_Desig_Chr06               | 4792873                        | (C/T)       |
| 29228       | CadSNP4823     | <i>Desi</i>      | Ca_Desig_Chr06               | 4792973                        | (G/A)       |
| 29229       | CadSNP4824     | <i>Desi</i>      | Ca_Desig_Chr06               | 4793066                        | (C/T)       |
| 29230       | CadSNP4825     | <i>Desi</i>      | Ca_Desig_Chr06               | 4793085                        | (G/A)       |
| 29231       | CadSNP4826     | <i>Desi</i>      | Ca_Desig_Chr06               | 4793164                        | (A/C)       |
| 29232       | CadSNP4827     | <i>Desi</i>      | Ca_Desig_Chr06               | 4793350                        | (T/C)       |
| 29233       | CadSNP4828     | <i>Desi</i>      | Ca_Desig_Chr06               | 4793852                        | (T/C)       |
| 29234       | CadSNP4829     | <i>Desi</i>      | Ca_Desig_Chr06               | 4793838                        | (A/C)       |
| 29235       | CadSNP4830     | <i>Desi</i>      | Ca_Desig_Chr06               | 4794865                        | (C/T)       |
| 29236       | CadSNP4831     | <i>Desi</i>      | Ca_Desig_Chr06               | 4799873                        | (A/G)       |
| 29237       | CadSNP4832     | <i>Desi</i>      | Ca_Desig_Chr06               | 4799905                        | (C/T)       |
| 29238       | CadSNP4833     | <i>Desi</i>      | Ca_Desig_Chr06               | 4804555                        | (G/T)       |
| 29239       | CadSNP4834     | <i>Desi</i>      | Ca_Desig_Chr06               | 4804535                        | (C/G)       |
| 29240       | CadSNP4835     | <i>Desi</i>      | Ca_Desig_Chr06               | 4805527                        | (C/T)       |
| 29241       | CadSNP4836     | <i>Desi</i>      | Ca_Desig_Chr06               | 4818656                        | (A/T)       |
| 29242       | CadSNP4837     | <i>Desi</i>      | Ca_Desig_Chr06               | 4818660                        | (T/C)       |
| 29243       | CadSNP4838     | <i>Desi</i>      | Ca_Desig_Chr06               | 4818734                        | (T/A)       |
| 29244       | CadSNP4839     | <i>Desi</i>      | Ca_Desig_Chr06               | 4836649                        | (G/A)       |
| 29245       | CadSNP4840     | <i>Desi</i>      | Ca_Desig_Chr06               | 4836631                        | (G/A)       |
| 29246       | CadSNP4841     | <i>Desi</i>      | Ca_Desig_Chr06               | 4863685                        | (C/A)       |
| 29247       | CadSNP4842     | <i>Desi</i>      | Ca_Desig_Chr06               | 4863652                        | (A/T)       |
| 29248       | CadSNP4843     | <i>Desi</i>      | Ca_Desig_Chr06               | 4868621                        | (G/T)       |
| 29249       | CadSNP4844     | <i>Desi</i>      | Ca_Desig_Chr06               | 4909271                        | (G/C)       |
| 29250       | CadSNP4845     | <i>Desi</i>      | Ca_Desig_Chr06               | 4909368                        | (A/T)       |
| 29251       | CadSNP4846     | <i>Desi</i>      | Ca_Desig_Chr06               | 4909457                        | (A/T)       |
| 29252       | CadSNP4847     | <i>Desi</i>      | Ca_Desig_Chr06               | 4909450                        | (T/G)       |
| 29253       | CadSNP4848     | <i>Desi</i>      | Ca_Desig_Chr06               | 4909446                        | (A/G)       |
| 29254       | CadSNP4849     | <i>Desi</i>      | Ca_Desig_Chr06               | 4909445                        | (T/C)       |
| 29255       | CadSNP4850     | <i>Desi</i>      | Ca_Desig_Chr06               | 4909421                        | (C/G)       |
| 29256       | CadSNP4851     | <i>Desi</i>      | Ca_Desig_Chr06               | 4909506                        | (C/A)       |
| 29257       | CadSNP4852     | <i>Desi</i>      | Ca_Desig_Chr06               | 4915673                        | (T/G)       |
| 29258       | CadSNP4853     | <i>Desi</i>      | Ca_Desig_Chr06               | 4999533                        | (T/G)       |
| 29259       | CadSNP4854     | <i>Desi</i>      | Ca_Desig_Chr06               | 4999880                        | (A/G)       |

| <b>S.N.</b> | <b>SNP IDs</b> | <b>Cultivars</b> | <b>Chromosomes/scaffolds</b> | <b>Physical positions (bp)</b> | <b>SNPs</b> |
|-------------|----------------|------------------|------------------------------|--------------------------------|-------------|
| 29260       | CadSNP4855     | <i>Desi</i>      | Ca_Desig_Chr06               | 5002016                        | (G/A)       |
| 29261       | CadSNP4856     | <i>Desi</i>      | Ca_Desig_Chr06               | 5009335                        | (C/T)       |
| 29262       | CadSNP4857     | <i>Desi</i>      | Ca_Desig_Chr06               | 5009363                        | (T/G)       |
| 29263       | CadSNP4858     | <i>Desi</i>      | Ca_Desig_Chr06               | 5009546                        | (A/G)       |
| 29264       | CadSNP4859     | <i>Desi</i>      | Ca_Desig_Chr06               | 5009529                        | (C/T)       |
| 29265       | CadSNP4860     | <i>Desi</i>      | Ca_Desig_Chr06               | 5009506                        | (G/T)       |
| 29266       | CadSNP4861     | <i>Desi</i>      | Ca_Desig_Chr06               | 5573657                        | (G/A)       |
| 29267       | CadSNP4862     | <i>Desi</i>      | Ca_Desig_Chr06               | 5582291                        | (C/T)       |
| 29268       | CadSNP4863     | <i>Desi</i>      | Ca_Desig_Chr06               | 5600377                        | (C/A)       |
| 29269       | CadSNP4864     | <i>Desi</i>      | Ca_Desig_Chr06               | 5611153                        | (A/G)       |
| 29270       | CadSNP4865     | <i>Desi</i>      | Ca_Desig_Chr06               | 5629010                        | (A/T)       |
| 29271       | CadSNP4866     | <i>Desi</i>      | Ca_Desig_Chr06               | 5639520                        | (G/A)       |
| 29272       | CadSNP4867     | <i>Desi</i>      | Ca_Desig_Chr06               | 5642730                        | (C/A)       |
| 29273       | CadSNP4868     | <i>Desi</i>      | Ca_Desig_Chr06               | 5645511                        | (C/T)       |
| 29274       | CadSNP4869     | <i>Desi</i>      | Ca_Desig_Chr06               | 5645500                        | (A/T)       |
| 29275       | CadSNP4870     | <i>Desi</i>      | Ca_Desig_Chr06               | 5645603                        | (C/T)       |
| 29276       | CadSNP4871     | <i>Desi</i>      | Ca_Desig_Chr06               | 5765527                        | (T/G)       |
| 29277       | CadSNP4872     | <i>Desi</i>      | Ca_Desig_Chr06               | 5765551                        | (G/A)       |
| 29278       | CadSNP4873     | <i>Desi</i>      | Ca_Desig_Chr06               | 5787184                        | (C/T)       |
| 29279       | CadSNP4874     | <i>Desi</i>      | Ca_Desig_Chr06               | 5793661                        | (T/C)       |
| 29280       | CadSNP4875     | <i>Desi</i>      | Ca_Desig_Chr06               | 5793689                        | (A/C)       |
| 29281       | CadSNP4876     | <i>Desi</i>      | Ca_Desig_Chr06               | 5793709                        | (G/T)       |
| 29282       | CadSNP4877     | <i>Desi</i>      | Ca_Desig_Chr06               | 5805177                        | (G/T)       |
| 29283       | CadSNP4878     | <i>Desi</i>      | Ca_Desig_Chr06               | 5805248                        | (T/C)       |
| 29284       | CadSNP4879     | <i>Desi</i>      | Ca_Desig_Chr06               | 5855179                        | (A/G)       |
| 29285       | CadSNP4880     | <i>Desi</i>      | Ca_Desig_Chr06               | 5855201                        | (T/C)       |
| 29286       | CadSNP4881     | <i>Desi</i>      | Ca_Desig_Chr06               | 5856090                        | (A/G)       |
| 29287       | CadSNP4882     | <i>Desi</i>      | Ca_Desig_Chr06               | 5857703                        | (G/A)       |
| 29288       | CadSNP4883     | <i>Desi</i>      | Ca_Desig_Chr06               | 5875812                        | (A/G)       |
| 29289       | CadSNP4884     | <i>Desi</i>      | Ca_Desig_Chr06               | 5881201                        | (C/T)       |
| 29290       | CadSNP4885     | <i>Desi</i>      | Ca_Desig_Chr06               | 5919255                        | (G/T)       |
| 29291       | CadSNP4886     | <i>Desi</i>      | Ca_Desig_Chr06               | 5934489                        | (A/G)       |
| 29292       | CadSNP4887     | <i>Desi</i>      | Ca_Desig_Chr06               | 5935304                        | (C/A)       |
| 29293       | CadSNP4888     | <i>Desi</i>      | Ca_Desig_Chr06               | 5942121                        | (G/A)       |
| 29294       | CadSNP4889     | <i>Desi</i>      | Ca_Desig_Chr06               | 5942263                        | (T/G)       |
| 29295       | CadSNP4890     | <i>Desi</i>      | Ca_Desig_Chr06               | 5943369                        | (C/T)       |
| 29296       | CadSNP4891     | <i>Desi</i>      | Ca_Desig_Chr06               | 5943564                        | (C/T)       |
| 29297       | CadSNP4892     | <i>Desi</i>      | Ca_Desig_Chr06               | 5943740                        | (G/A)       |

| <b>S.N.</b> | <b>SNP IDs</b> | <b>Cultivars</b> | <b>Chromosomes/scaffolds</b> | <b>Physical positions (bp)</b> | <b>SNPs</b> |
|-------------|----------------|------------------|------------------------------|--------------------------------|-------------|
| 29298       | CadSNP4893     | <i>Desi</i>      | Ca_Desig_Chr06               | 5944029                        | (A/G)       |
| 29299       | CadSNP4894     | <i>Desi</i>      | Ca_Desig_Chr06               | 5944053                        | (G/A)       |
| 29300       | CadSNP4895     | <i>Desi</i>      | Ca_Desig_Chr06               | 5944054                        | (G/A)       |
| 29301       | CadSNP4896     | <i>Desi</i>      | Ca_Desig_Chr06               | 5944184                        | (C/T)       |
| 29302       | CadSNP4897     | <i>Desi</i>      | Ca_Desig_Chr06               | 5944178                        | (C/T)       |
| 29303       | CadSNP4898     | <i>Desi</i>      | Ca_Desig_Chr06               | 5946749                        | (C/T)       |
| 29304       | CadSNP4899     | <i>Desi</i>      | Ca_Desig_Chr06               | 5947076                        | (G/A)       |
| 29305       | CadSNP4900     | <i>Desi</i>      | Ca_Desig_Chr06               | 5947049                        | (G/T)       |
| 29306       | CadSNP4901     | <i>Desi</i>      | Ca_Desig_Chr06               | 5947130                        | (G/A)       |
| 29307       | CadSNP4902     | <i>Desi</i>      | Ca_Desig_Chr06               | 5947581                        | (G/A)       |
| 29308       | CadSNP4903     | <i>Desi</i>      | Ca_Desig_Chr06               | 5947892                        | (C/T)       |
| 29309       | CadSNP4904     | <i>Desi</i>      | Ca_Desig_Chr06               | 5948138                        | (T/A)       |
| 29310       | CadSNP4905     | <i>Desi</i>      | Ca_Desig_Chr06               | 5967285                        | (G/C)       |
| 29311       | CadSNP4906     | <i>Desi</i>      | Ca_Desig_Chr06               | 6048824                        | (C/T)       |
| 29312       | CadSNP4907     | <i>Desi</i>      | Ca_Desig_Chr06               | 6048899                        | (T/C)       |
| 29313       | CadSNP4908     | <i>Desi</i>      | Ca_Desig_Chr06               | 6048900                        | (G/A)       |
| 29314       | CadSNP4909     | <i>Desi</i>      | Ca_Desig_Chr06               | 6048909                        | (C/T)       |
| 29315       | CadSNP4910     | <i>Desi</i>      | Ca_Desig_Chr06               | 6048945                        | (T/C)       |
| 29316       | CadSNP4911     | <i>Desi</i>      | Ca_Desig_Chr06               | 6049054                        | (A/G)       |
| 29317       | CadSNP4912     | <i>Desi</i>      | Ca_Desig_Chr06               | 6049190                        | (G/A)       |
| 29318       | CadSNP4913     | <i>Desi</i>      | Ca_Desig_Chr06               | 6049189                        | (C/T)       |
| 29319       | CadSNP4914     | <i>Desi</i>      | Ca_Desig_Chr06               | 6049168                        | (A/C)       |
| 29320       | CadSNP4915     | <i>Desi</i>      | Ca_Desig_Chr06               | 6058591                        | (T/A)       |
| 29321       | CadSNP4916     | <i>Desi</i>      | Ca_Desig_Chr06               | 6058595                        | (T/G)       |
| 29322       | CadSNP4917     | <i>Desi</i>      | Ca_Desig_Chr06               | 6058779                        | (A/G)       |
| 29323       | CadSNP4918     | <i>Desi</i>      | Ca_Desig_Chr06               | 6062860                        | (C/G)       |
| 29324       | CadSNP4919     | <i>Desi</i>      | Ca_Desig_Chr06               | 6103720                        | (G/T)       |
| 29325       | CadSNP4920     | <i>Desi</i>      | Ca_Desig_Chr06               | 6119010                        | (C/T)       |
| 29326       | CadSNP4921     | <i>Desi</i>      | Ca_Desig_Chr06               | 6119060                        | (G/A)       |
| 29327       | CadSNP4922     | <i>Desi</i>      | Ca_Desig_Chr06               | 6121161                        | (G/T)       |
| 29328       | CadSNP4923     | <i>Desi</i>      | Ca_Desig_Chr06               | 6334146                        | (C/T)       |
| 29329       | CadSNP4924     | <i>Desi</i>      | Ca_Desig_Chr06               | 6334167                        | (T/C)       |
| 29330       | CadSNP4925     | <i>Desi</i>      | Ca_Desig_Chr06               | 6334238                        | (T/C)       |
| 29331       | CadSNP4926     | <i>Desi</i>      | Ca_Desig_Chr06               | 6334224                        | (G/A)       |
| 29332       | CadSNP4927     | <i>Desi</i>      | Ca_Desig_Chr06               | 6334215                        | (T/C)       |
| 29333       | CadSNP4928     | <i>Desi</i>      | Ca_Desig_Chr06               | 6335461                        | (A/C)       |
| 29334       | CadSNP4929     | <i>Desi</i>      | Ca_Desig_Chr06               | 6335472                        | (T/C)       |
| 29335       | CadSNP4930     | <i>Desi</i>      | Ca_Desig_Chr06               | 6335576                        | (A/G)       |

| <b>S.N.</b> | <b>SNP IDs</b> | <b>Cultivars</b> | <b>Chromosomes/scaffolds</b> | <b>Physical positions (bp)</b> | <b>SNPs</b> |
|-------------|----------------|------------------|------------------------------|--------------------------------|-------------|
| 29336       | CadSNP4931     | <i>Desi</i>      | Ca_Desig_Chr06               | 6335557                        | (G/T)       |
| 29337       | CadSNP4932     | <i>Desi</i>      | Ca_Desig_Chr06               | 6336378                        | (C/G)       |
| 29338       | CadSNP4933     | <i>Desi</i>      | Ca_Desig_Chr06               | 6338657                        | (C/T)       |
| 29339       | CadSNP4934     | <i>Desi</i>      | Ca_Desig_Chr06               | 6339136                        | (T/C)       |
| 29340       | CadSNP4935     | <i>Desi</i>      | Ca_Desig_Chr06               | 6370183                        | (A/C)       |
| 29341       | CadSNP4936     | <i>Desi</i>      | Ca_Desig_Chr06               | 6573612                        | (A/G)       |
| 29342       | CadSNP4937     | <i>Desi</i>      | Ca_Desig_Chr06               | 6573627                        | (A/G)       |
| 29343       | CadSNP4938     | <i>Desi</i>      | Ca_Desig_Chr06               | 6667269                        | (T/C)       |
| 29344       | CadSNP4939     | <i>Desi</i>      | Ca_Desig_Chr06               | 6681486                        | (G/T)       |
| 29345       | CadSNP4940     | <i>Desi</i>      | Ca_Desig_Chr06               | 6681472                        | (A/G)       |
| 29346       | CadSNP4941     | <i>Desi</i>      | Ca_Desig_Chr06               | 6772814                        | (G/T)       |
| 29347       | CadSNP4942     | <i>Desi</i>      | Ca_Desig_Chr06               | 6792786                        | (T/C)       |
| 29348       | CadSNP4943     | <i>Desi</i>      | Ca_Desig_Chr06               | 6792785                        | (C/A)       |
| 29349       | CadSNP4944     | <i>Desi</i>      | Ca_Desig_Chr06               | 6792774                        | (A/T)       |
| 29350       | CadSNP4945     | <i>Desi</i>      | Ca_Desig_Chr06               | 6792771                        | (A/T)       |
| 29351       | CadSNP4946     | <i>Desi</i>      | Ca_Desig_Chr06               | 6792770                        | (C/T)       |
| 29352       | CadSNP4947     | <i>Desi</i>      | Ca_Desig_Chr06               | 6800422                        | (G/A)       |
| 29353       | CadSNP4948     | <i>Desi</i>      | Ca_Desig_Chr06               | 6800476                        | (G/A)       |
| 29354       | CadSNP4949     | <i>Desi</i>      | Ca_Desig_Chr06               | 6803657                        | (C/T)       |
| 29355       | CadSNP4950     | <i>Desi</i>      | Ca_Desig_Chr06               | 6803663                        | (T/C)       |
| 29356       | CadSNP4951     | <i>Desi</i>      | Ca_Desig_Chr06               | 6842192                        | (G/A)       |
| 29357       | CadSNP4952     | <i>Desi</i>      | Ca_Desig_Chr06               | 6875940                        | (C/T)       |
| 29358       | CadSNP4953     | <i>Desi</i>      | Ca_Desig_Chr06               | 6888687                        | (A/G)       |
| 29359       | CadSNP4954     | <i>Desi</i>      | Ca_Desig_Chr06               | 6888688                        | (A/G)       |
| 29360       | CadSNP4955     | <i>Desi</i>      | Ca_Desig_Chr06               | 6897740                        | (T/C)       |
| 29361       | CadSNP4956     | <i>Desi</i>      | Ca_Desig_Chr06               | 6924931                        | (G/T)       |
| 29362       | CadSNP4957     | <i>Desi</i>      | Ca_Desig_Chr06               | 6926284                        | (T/G)       |
| 29363       | CadSNP4958     | <i>Desi</i>      | Ca_Desig_Chr06               | 6928436                        | (A/G)       |
| 29364       | CadSNP4959     | <i>Desi</i>      | Ca_Desig_Chr06               | 6952716                        | (T/G)       |
| 29365       | CadSNP4960     | <i>Desi</i>      | Ca_Desig_Chr06               | 6967917                        | (C/T)       |
| 29366       | CadSNP4961     | <i>Desi</i>      | Ca_Desig_Chr06               | 6967943                        | (G/A)       |
| 29367       | CadSNP4962     | <i>Desi</i>      | Ca_Desig_Chr06               | 6967945                        | (A/C)       |
| 29368       | CadSNP4963     | <i>Desi</i>      | Ca_Desig_Chr06               | 6967990                        | (T/G)       |
| 29369       | CadSNP4964     | <i>Desi</i>      | Ca_Desig_Chr06               | 6968625                        | (T/G)       |
| 29370       | CadSNP4965     | <i>Desi</i>      | Ca_Desig_Chr06               | 6968628                        | (G/T)       |
| 29371       | CadSNP4966     | <i>Desi</i>      | Ca_Desig_Chr06               | 6971767                        | (A/G)       |
| 29372       | CadSNP4967     | <i>Desi</i>      | Ca_Desig_Chr06               | 6995748                        | (C/T)       |
| 29373       | CadSNP4968     | <i>Desi</i>      | Ca_Desig_Chr06               | 6996408                        | (C/T)       |

| <b>S.N.</b> | <b>SNP IDs</b> | <b>Cultivars</b> | <b>Chromosomes/scaffolds</b> | <b>Physical positions (bp)</b> | <b>SNPs</b> |
|-------------|----------------|------------------|------------------------------|--------------------------------|-------------|
| 29374       | CadSNP4969     | <i>Desi</i>      | Ca_Desig_Chr06               | 7112715                        | (T/G)       |
| 29375       | CadSNP4970     | <i>Desi</i>      | Ca_Desig_Chr06               | 7143967                        | (T/A)       |
| 29376       | CadSNP4971     | <i>Desi</i>      | Ca_Desig_Chr06               | 7144039                        | (G/A)       |
| 29377       | CadSNP4972     | <i>Desi</i>      | Ca_Desig_Chr06               | 7144010                        | (G/T)       |
| 29378       | CadSNP4973     | <i>Desi</i>      | Ca_Desig_Chr06               | 7231216                        | (G/C)       |
| 29379       | CadSNP4974     | <i>Desi</i>      | Ca_Desig_Chr06               | 7241176                        | (A/T)       |
| 29380       | CadSNP4975     | <i>Desi</i>      | Ca_Desig_Chr06               | 7280811                        | (T/C)       |
| 29381       | CadSNP4976     | <i>Desi</i>      | Ca_Desig_Chr06               | 7280959                        | (C/A)       |
| 29382       | CadSNP4977     | <i>Desi</i>      | Ca_Desig_Chr06               | 7337525                        | (G/A)       |
| 29383       | CadSNP4978     | <i>Desi</i>      | Ca_Desig_Chr06               | 7337556                        | (C/T)       |
| 29384       | CadSNP4979     | <i>Desi</i>      | Ca_Desig_Chr06               | 7337559                        | (T/C)       |
| 29385       | CadSNP4980     | <i>Desi</i>      | Ca_Desig_Chr06               | 7337569                        | (T/A)       |
| 29386       | CadSNP4981     | <i>Desi</i>      | Ca_Desig_Chr06               | 7340661                        | (C/A)       |
| 29387       | CadSNP4982     | <i>Desi</i>      | Ca_Desig_Chr06               | 7364889                        | (T/C)       |
| 29388       | CadSNP4983     | <i>Desi</i>      | Ca_Desig_Chr06               | 7364880                        | (C/G)       |
| 29389       | CadSNP4984     | <i>Desi</i>      | Ca_Desig_Chr06               | 7414777                        | (C/G)       |
| 29390       | CadSNP4985     | <i>Desi</i>      | Ca_Desig_Chr06               | 7537049                        | (A/G)       |
| 29391       | CadSNP4986     | <i>Desi</i>      | Ca_Desig_Chr06               | 7537061                        | (T/C)       |
| 29392       | CadSNP4987     | <i>Desi</i>      | Ca_Desig_Chr06               | 7537095                        | (G/A)       |
| 29393       | CadSNP4988     | <i>Desi</i>      | Ca_Desig_Chr06               | 7539901                        | (T/A)       |
| 29394       | CadSNP4989     | <i>Desi</i>      | Ca_Desig_Chr06               | 7540355                        | (G/A)       |
| 29395       | CadSNP4990     | <i>Desi</i>      | Ca_Desig_Chr06               | 7540353                        | (G/A)       |
| 29396       | CadSNP4991     | <i>Desi</i>      | Ca_Desig_Chr06               | 7540327                        | (T/G)       |
| 29397       | CadSNP4992     | <i>Desi</i>      | Ca_Desig_Chr06               | 7572679                        | (T/G)       |
| 29398       | CadSNP4993     | <i>Desi</i>      | Ca_Desig_Chr06               | 7572682                        | (C/T)       |
| 29399       | CadSNP4994     | <i>Desi</i>      | Ca_Desig_Chr06               | 7572696                        | (C/T)       |
| 29400       | CadSNP4995     | <i>Desi</i>      | Ca_Desig_Chr06               | 7597654                        | (G/A)       |
| 29401       | CadSNP4996     | <i>Desi</i>      | Ca_Desig_Chr06               | 7597902                        | (A/G)       |
| 29402       | CadSNP4997     | <i>Desi</i>      | Ca_Desig_Chr06               | 7692140                        | (G/A)       |
| 29403       | CadSNP4998     | <i>Desi</i>      | Ca_Desig_Chr06               | 7707117                        | (C/T)       |
| 29404       | CadSNP4999     | <i>Desi</i>      | Ca_Desig_Chr06               | 7707069                        | (A/C)       |
| 29405       | CadSNP5000     | <i>Desi</i>      | Ca_Desig_Chr06               | 7708557                        | (A/C)       |
| 29406       | CadSNP5001     | <i>Desi</i>      | Ca_Desig_Chr06               | 7708553                        | (T/C)       |
| 29407       | CadSNP5002     | <i>Desi</i>      | Ca_Desig_Chr06               | 7793284                        | (T/G)       |
| 29408       | CadSNP5003     | <i>Desi</i>      | Ca_Desig_Chr06               | 7837703                        | (G/A)       |
| 29409       | CadSNP5004     | <i>Desi</i>      | Ca_Desig_Chr06               | 7881884                        | (C/A)       |
| 29410       | CadSNP5005     | <i>Desi</i>      | Ca_Desig_Chr06               | 7881974                        | (C/T)       |
| 29411       | CadSNP5006     | <i>Desi</i>      | Ca_Desig_Chr06               | 7883757                        | (A/G)       |



| <b>S.N.</b> | <b>SNP IDs</b> | <b>Cultivars</b> | <b>Chromosomes/scaffolds</b> | <b>Physical positions (bp)</b> | <b>SNPs</b> |
|-------------|----------------|------------------|------------------------------|--------------------------------|-------------|
| 29412       | CadSNP5007     | <i>Desi</i>      | Ca_Desig_Chr06               | 7891823                        | (G/A)       |
| 29413       | CadSNP5008     | <i>Desi</i>      | Ca_Desig_Chr06               | 7891904                        | (T/C)       |
| 29414       | CadSNP5009     | <i>Desi</i>      | Ca_Desig_Chr06               | 7891893                        | (G/A)       |
| 29415       | CadSNP5010     | <i>Desi</i>      | Ca_Desig_Chr06               | 7956395                        | (A/G)       |
| 29416       | CadSNP5011     | <i>Desi</i>      | Ca_Desig_Chr06               | 7959130                        | (T/A)       |
| 29417       | CadSNP5012     | <i>Desi</i>      | Ca_Desig_Chr06               | 7959189                        | (A/T)       |
| 29418       | CadSNP5013     | <i>Desi</i>      | Ca_Desig_Chr06               | 7959193                        | (C/G)       |
| 29419       | CadSNP5014     | <i>Desi</i>      | Ca_Desig_Chr06               | 7959207                        | (A/T)       |
| 29420       | CadSNP5015     | <i>Desi</i>      | Ca_Desig_Chr06               | 7959236                        | (A/T)       |
| 29421       | CadSNP5016     | <i>Desi</i>      | Ca_Desig_Chr06               | 7959244                        | (T/C)       |
| 29422       | CadSNP5017     | <i>Desi</i>      | Ca_Desig_Chr06               | 7959263                        | (A/G)       |
| 29423       | CadSNP5018     | <i>Desi</i>      | Ca_Desig_Chr06               | 7959943                        | (A/G)       |
| 29424       | CadSNP5019     | <i>Desi</i>      | Ca_Desig_Chr06               | 7960015                        | (T/G)       |
| 29425       | CadSNP5020     | <i>Desi</i>      | Ca_Desig_Chr06               | 7960007                        | (A/G)       |
| 29426       | CadSNP5021     | <i>Desi</i>      | Ca_Desig_Chr06               | 7968788                        | (A/C)       |
| 29427       | CadSNP5022     | <i>Desi</i>      | Ca_Desig_Chr06               | 7968800                        | (C/G)       |
| 29428       | CadSNP5023     | <i>Desi</i>      | Ca_Desig_Chr06               | 7968802                        | (C/T)       |
| 29429       | CadSNP5024     | <i>Desi</i>      | Ca_Desig_Chr06               | 7969668                        | (A/G)       |
| 29430       | CadSNP5025     | <i>Desi</i>      | Ca_Desig_Chr06               | 7969725                        | (A/C)       |
| 29431       | CadSNP5026     | <i>Desi</i>      | Ca_Desig_Chr06               | 7991168                        | (A/T)       |
| 29432       | CadSNP5027     | <i>Desi</i>      | Ca_Desig_Chr06               | 7991195                        | (C/T)       |
| 29433       | CadSNP5028     | <i>Desi</i>      | Ca_Desig_Chr06               | 7991300                        | (C/T)       |
| 29434       | CadSNP5029     | <i>Desi</i>      | Ca_Desig_Chr06               | 8009576                        | (C/G)       |
| 29435       | CadSNP5030     | <i>Desi</i>      | Ca_Desig_Chr06               | 8009582                        | (C/T)       |
| 29436       | CadSNP5031     | <i>Desi</i>      | Ca_Desig_Chr06               | 8009585                        | (T/C)       |
| 29437       | CadSNP5032     | <i>Desi</i>      | Ca_Desig_Chr06               | 8009591                        | (G/A)       |
| 29438       | CadSNP5033     | <i>Desi</i>      | Ca_Desig_Chr06               | 8009597                        | (T/C)       |
| 29439       | CadSNP5034     | <i>Desi</i>      | Ca_Desig_Chr06               | 8009600                        | (T/C)       |
| 29440       | CadSNP5035     | <i>Desi</i>      | Ca_Desig_Chr06               | 8009604                        | (T/C)       |
| 29441       | CadSNP5036     | <i>Desi</i>      | Ca_Desig_Chr06               | 8009612                        | (C/T)       |
| 29442       | CadSNP5037     | <i>Desi</i>      | Ca_Desig_Chr06               | 8009613                        | (C/T)       |
| 29443       | CadSNP5038     | <i>Desi</i>      | Ca_Desig_Chr06               | 8009615                        | (T/G)       |
| 29444       | CadSNP5039     | <i>Desi</i>      | Ca_Desig_Chr06               | 8009624                        | (T/C)       |
| 29445       | CadSNP5040     | <i>Desi</i>      | Ca_Desig_Chr06               | 8009648                        | (G/A)       |
| 29446       | CadSNP5041     | <i>Desi</i>      | Ca_Desig_Chr06               | 8009947                        | (C/T)       |
| 29447       | CadSNP5042     | <i>Desi</i>      | Ca_Desig_Chr06               | 8009941                        | (G/C)       |
| 29448       | CadSNP5043     | <i>Desi</i>      | Ca_Desig_Chr06               | 8009936                        | (T/C)       |
| 29449       | CadSNP5044     | <i>Desi</i>      | Ca_Desig_Chr06               | 8009934                        | (G/A)       |

| <b>S.N.</b> | <b>SNP IDs</b> | <b>Cultivars</b> | <b>Chromosomes/scaffolds</b> | <b>Physical positions (bp)</b> | <b>SNPs</b> |
|-------------|----------------|------------------|------------------------------|--------------------------------|-------------|
| 29450       | CadSNP5045     | <i>Desi</i>      | Ca_Desig_Chr06               | 8009901                        | (C/T)       |
| 29451       | CadSNP5046     | <i>Desi</i>      | Ca_Desig_Chr06               | 8018615                        | (C/T)       |
| 29452       | CadSNP5047     | <i>Desi</i>      | Ca_Desig_Chr06               | 8018630                        | (C/T)       |
| 29453       | CadSNP5048     | <i>Desi</i>      | Ca_Desig_Chr06               | 8018633                        | (C/G)       |
| 29454       | CadSNP5049     | <i>Desi</i>      | Ca_Desig_Chr06               | 8018634                        | (A/G)       |
| 29455       | CadSNP5050     | <i>Desi</i>      | Ca_Desig_Chr06               | 8018636                        | (C/T)       |
| 29456       | CadSNP5051     | <i>Desi</i>      | Ca_Desig_Chr06               | 8018649                        | (A/G)       |
| 29457       | CadSNP5052     | <i>Desi</i>      | Ca_Desig_Chr06               | 8018654                        | (C/T)       |
| 29458       | CadSNP5053     | <i>Desi</i>      | Ca_Desig_Chr06               | 8018656                        | (G/T)       |
| 29459       | CadSNP5054     | <i>Desi</i>      | Ca_Desig_Chr06               | 8018669                        | (A/G)       |
| 29460       | CadSNP5055     | <i>Desi</i>      | Ca_Desig_Chr06               | 8018679                        | (G/T)       |
| 29461       | CadSNP5056     | <i>Desi</i>      | Ca_Desig_Chr06               | 8018681                        | (A/T)       |
| 29462       | CadSNP5057     | <i>Desi</i>      | Ca_Desig_Chr06               | 8018684                        | (C/G)       |
| 29463       | CadSNP5058     | <i>Desi</i>      | Ca_Desig_Chr06               | 8018944                        | (C/T)       |
| 29464       | CadSNP5059     | <i>Desi</i>      | Ca_Desig_Chr06               | 8022275                        | (A/G)       |
| 29465       | CadSNP5060     | <i>Desi</i>      | Ca_Desig_Chr06               | 8022631                        | (C/G)       |
| 29466       | CadSNP5061     | <i>Desi</i>      | Ca_Desig_Chr06               | 8022636                        | (T/G)       |
| 29467       | CadSNP5062     | <i>Desi</i>      | Ca_Desig_Chr06               | 8023046                        | (A/G)       |
| 29468       | CadSNP5063     | <i>Desi</i>      | Ca_Desig_Chr06               | 8023049                        | (T/C)       |
| 29469       | CadSNP5064     | <i>Desi</i>      | Ca_Desig_Chr06               | 8079486                        | (G/C)       |
| 29470       | CadSNP5065     | <i>Desi</i>      | Ca_Desig_Chr06               | 8093339                        | (G/T)       |
| 29471       | CadSNP5066     | <i>Desi</i>      | Ca_Desig_Chr06               | 8093340                        | (T/G)       |
| 29472       | CadSNP5067     | <i>Desi</i>      | Ca_Desig_Chr06               | 8093346                        | (T/A)       |
| 29473       | CadSNP5068     | <i>Desi</i>      | Ca_Desig_Chr06               | 8103275                        | (G/A)       |
| 29474       | CadSNP5069     | <i>Desi</i>      | Ca_Desig_Chr06               | 8111499                        | (C/A)       |
| 29475       | CadSNP5070     | <i>Desi</i>      | Ca_Desig_Chr06               | 8111501                        | (C/A)       |
| 29476       | CadSNP5071     | <i>Desi</i>      | Ca_Desig_Chr06               | 8426279                        | (T/A)       |
| 29477       | CadSNP5072     | <i>Desi</i>      | Ca_Desig_Chr06               | 8443103                        | (G/A)       |
| 29478       | CadSNP5073     | <i>Desi</i>      | Ca_Desig_Chr06               | 8468359                        | (G/A)       |
| 29479       | CadSNP5074     | <i>Desi</i>      | Ca_Desig_Chr06               | 8585668                        | (C/G)       |
| 29480       | CadSNP5075     | <i>Desi</i>      | Ca_Desig_Chr06               | 8585671                        | (G/A)       |
| 29481       | CadSNP5076     | <i>Desi</i>      | Ca_Desig_Chr06               | 8585672                        | (A/T)       |
| 29482       | CadSNP5077     | <i>Desi</i>      | Ca_Desig_Chr06               | 8585678                        | (T/C)       |
| 29483       | CadSNP5078     | <i>Desi</i>      | Ca_Desig_Chr06               | 8585702                        | (C/T)       |
| 29484       | CadSNP5079     | <i>Desi</i>      | Ca_Desig_Chr06               | 8585714                        | (C/G)       |
| 29485       | CadSNP5080     | <i>Desi</i>      | Ca_Desig_Chr06               | 8585725                        | (T/C)       |
| 29486       | CadSNP5081     | <i>Desi</i>      | Ca_Desig_Chr06               | 8585804                        | (A/T)       |
| 29487       | CadSNP5082     | <i>Desi</i>      | Ca_Desig_Chr06               | 8616328                        | (G/A)       |

| <b>S.N.</b> | <b>SNP IDs</b> | <b>Cultivars</b> | <b>Chromosomes/scaffolds</b> | <b>Physical positions (bp)</b> | <b>SNPs</b> |
|-------------|----------------|------------------|------------------------------|--------------------------------|-------------|
| 29488       | CadSNP5083     | <i>Desi</i>      | Ca_Desig_Chr06               | 8616288                        | (A/C)       |
| 29489       | CadSNP5084     | <i>Desi</i>      | Ca_Desig_Chr06               | 8628430                        | (T/C)       |
| 29490       | CadSNP5085     | <i>Desi</i>      | Ca_Desig_Chr06               | 8631889                        | (G/A)       |
| 29491       | CadSNP5086     | <i>Desi</i>      | Ca_Desig_Chr06               | 8654685                        | (T/G)       |
| 29492       | CadSNP5087     | <i>Desi</i>      | Ca_Desig_Chr06               | 8730974                        | (T/C)       |
| 29493       | CadSNP5088     | <i>Desi</i>      | Ca_Desig_Chr06               | 8731110                        | (C/T)       |
| 29494       | CadSNP5089     | <i>Desi</i>      | Ca_Desig_Chr06               | 8731127                        | (C/T)       |
| 29495       | CadSNP5090     | <i>Desi</i>      | Ca_Desig_Chr06               | 8731132                        | (T/G)       |
| 29496       | CadSNP5091     | <i>Desi</i>      | Ca_Desig_Chr06               | 8731161                        | (C/T)       |
| 29497       | CadSNP5092     | <i>Desi</i>      | Ca_Desig_Chr06               | 8731230                        | (A/G)       |
| 29498       | CadSNP5093     | <i>Desi</i>      | Ca_Desig_Chr06               | 8731256                        | (A/C)       |
| 29499       | CadSNP5094     | <i>Desi</i>      | Ca_Desig_Chr06               | 8731250                        | (G/T)       |
| 29500       | CadSNP5095     | <i>Desi</i>      | Ca_Desig_Chr06               | 8731302                        | (A/T)       |
| 29501       | CadSNP5096     | <i>Desi</i>      | Ca_Desig_Chr06               | 8737791                        | (A/T)       |
| 29502       | CadSNP5097     | <i>Desi</i>      | Ca_Desig_Chr06               | 8737776                        | (A/C)       |
| 29503       | CadSNP5098     | <i>Desi</i>      | Ca_Desig_Chr06               | 9154535                        | (A/T)       |
| 29504       | CadSNP5099     | <i>Desi</i>      | Ca_Desig_Chr06               | 9172261                        | (A/G)       |
| 29505       | CadSNP5100     | <i>Desi</i>      | Ca_Desig_Chr06               | 9216495                        | (T/G)       |
| 29506       | CadSNP5101     | <i>Desi</i>      | Ca_Desig_Chr06               | 9216522                        | (A/C)       |
| 29507       | CadSNP5102     | <i>Desi</i>      | Ca_Desig_Chr06               | 9216541                        | (C/A)       |
| 29508       | CadSNP5103     | <i>Desi</i>      | Ca_Desig_Chr06               | 9222307                        | (T/C)       |
| 29509       | CadSNP5104     | <i>Desi</i>      | Ca_Desig_Chr06               | 9223567                        | (T/A)       |
| 29510       | CadSNP5105     | <i>Desi</i>      | Ca_Desig_Chr06               | 9245293                        | (T/A)       |
| 29511       | CadSNP5106     | <i>Desi</i>      | Ca_Desig_Chr06               | 9250164                        | (A/T)       |
| 29512       | CadSNP5107     | <i>Desi</i>      | Ca_Desig_Chr06               | 9250223                        | (A/G)       |
| 29513       | CadSNP5108     | <i>Desi</i>      | Ca_Desig_Chr06               | 9253759                        | (T/C)       |
| 29514       | CadSNP5109     | <i>Desi</i>      | Ca_Desig_Chr06               | 9268782                        | (C/G)       |
| 29515       | CadSNP5110     | <i>Desi</i>      | Ca_Desig_Chr06               | 9268768                        | (C/G)       |
| 29516       | CadSNP5111     | <i>Desi</i>      | Ca_Desig_Chr06               | 9268767                        | (A/G)       |
| 29517       | CadSNP5112     | <i>Desi</i>      | Ca_Desig_Chr06               | 9339744                        | (G/A)       |
| 29518       | CadSNP5113     | <i>Desi</i>      | Ca_Desig_Chr06               | 9339776                        | (G/C)       |
| 29519       | CadSNP5114     | <i>Desi</i>      | Ca_Desig_Chr06               | 9339784                        | (C/T)       |
| 29520       | CadSNP5115     | <i>Desi</i>      | Ca_Desig_Chr06               | 9371666                        | (T/G)       |
| 29521       | CadSNP5116     | <i>Desi</i>      | Ca_Desig_Chr06               | 9371665                        | (C/T)       |
| 29522       | CadSNP5117     | <i>Desi</i>      | Ca_Desig_Chr06               | 9371663                        | (A/C)       |
| 29523       | CadSNP5118     | <i>Desi</i>      | Ca_Desig_Chr06               | 9379256                        | (C/T)       |
| 29524       | CadSNP5119     | <i>Desi</i>      | Ca_Desig_Chr06               | 9391599                        | (G/T)       |
| 29525       | CadSNP5120     | <i>Desi</i>      | Ca_Desig_Chr06               | 9406600                        | (C/A)       |

| <b>S.N.</b> | <b>SNP IDs</b> | <b>Cultivars</b> | <b>Chromosomes/scaffolds</b> | <b>Physical positions (bp)</b> | <b>SNPs</b> |
|-------------|----------------|------------------|------------------------------|--------------------------------|-------------|
| 29526       | CadSNP5121     | <i>Desi</i>      | Ca_Desig_Chr06               | 9406646                        | (A/T)       |
| 29527       | CadSNP5122     | <i>Desi</i>      | Ca_Desig_Chr06               | 9406789                        | (A/C)       |
| 29528       | CadSNP5123     | <i>Desi</i>      | Ca_Desig_Chr06               | 9425019                        | (C/T)       |
| 29529       | CadSNP5124     | <i>Desi</i>      | Ca_Desig_Chr06               | 9470270                        | (A/T)       |
| 29530       | CadSNP5125     | <i>Desi</i>      | Ca_Desig_Chr06               | 9470298                        | (T/C)       |
| 29531       | CadSNP5126     | <i>Desi</i>      | Ca_Desig_Chr06               | 9507932                        | (T/G)       |
| 29532       | CadSNP5127     | <i>Desi</i>      | Ca_Desig_Chr06               | 9521696                        | (C/G)       |
| 29533       | CadSNP5128     | <i>Desi</i>      | Ca_Desig_Chr06               | 9521740                        | (A/G)       |
| 29534       | CadSNP5129     | <i>Desi</i>      | Ca_Desig_Chr06               | 9522638                        | (C/A)       |
| 29535       | CadSNP5130     | <i>Desi</i>      | Ca_Desig_Chr06               | 9522738                        | (A/G)       |
| 29536       | CadSNP5131     | <i>Desi</i>      | Ca_Desig_Chr06               | 9522719                        | (G/C)       |
| 29537       | CadSNP5132     | <i>Desi</i>      | Ca_Desig_Chr06               | 9522979                        | (G/A)       |
| 29538       | CadSNP5133     | <i>Desi</i>      | Ca_Desig_Chr06               | 9523028                        | (T/C)       |
| 29539       | CadSNP5134     | <i>Desi</i>      | Ca_Desig_Chr06               | 9523023                        | (A/C)       |
| 29540       | CadSNP5135     | <i>Desi</i>      | Ca_Desig_Chr06               | 9523022                        | (A/G)       |
| 29541       | CadSNP5136     | <i>Desi</i>      | Ca_Desig_Chr06               | 9522994                        | (A/T)       |
| 29542       | CadSNP5137     | <i>Desi</i>      | Ca_Desig_Chr06               | 9523146                        | (C/A)       |
| 29543       | CadSNP5138     | <i>Desi</i>      | Ca_Desig_Chr06               | 9523152                        | (C/G)       |
| 29544       | CadSNP5139     | <i>Desi</i>      | Ca_Desig_Chr06               | 9523154                        | (G/A)       |
| 29545       | CadSNP5140     | <i>Desi</i>      | Ca_Desig_Chr06               | 9523262                        | (T/C)       |
| 29546       | CadSNP5141     | <i>Desi</i>      | Ca_Desig_Chr06               | 9523261                        | (T/A)       |
| 29547       | CadSNP5142     | <i>Desi</i>      | Ca_Desig_Chr06               | 9628736                        | (C/T)       |
| 29548       | CadSNP5143     | <i>Desi</i>      | Ca_Desig_Chr06               | 9628856                        | (A/C)       |
| 29549       | CadSNP5144     | <i>Desi</i>      | Ca_Desig_Chr06               | 9628944                        | (G/A)       |
| 29550       | CadSNP5145     | <i>Desi</i>      | Ca_Desig_Chr06               | 9628912                        | (A/G)       |
| 29551       | CadSNP5146     | <i>Desi</i>      | Ca_Desig_Chr06               | 9691343                        | (C/T)       |
| 29552       | CadSNP5147     | <i>Desi</i>      | Ca_Desig_Chr06               | 9701965                        | (A/G)       |
| 29553       | CadSNP5148     | <i>Desi</i>      | Ca_Desig_Chr06               | 9728010                        | (T/G)       |
| 29554       | CadSNP5149     | <i>Desi</i>      | Ca_Desig_Chr06               | 9728012                        | (A/G)       |
| 29555       | CadSNP5150     | <i>Desi</i>      | Ca_Desig_Chr06               | 9728023                        | (A/T)       |
| 29556       | CadSNP5151     | <i>Desi</i>      | Ca_Desig_Chr06               | 9728043                        | (A/C)       |
| 29557       | CadSNP5152     | <i>Desi</i>      | Ca_Desig_Chr06               | 9728141                        | (G/T)       |
| 29558       | CadSNP5153     | <i>Desi</i>      | Ca_Desig_Chr06               | 9728118                        | (G/T)       |
| 29559       | CadSNP5154     | <i>Desi</i>      | Ca_Desig_Chr06               | 9769838                        | (G/A)       |
| 29560       | CadSNP5155     | <i>Desi</i>      | Ca_Desig_Chr06               | 9770231                        | (A/G)       |
| 29561       | CadSNP5156     | <i>Desi</i>      | Ca_Desig_Chr06               | 9801070                        | (G/A)       |
| 29562       | CadSNP5157     | <i>Desi</i>      | Ca_Desig_Chr06               | 9801087                        | (C/T)       |
| 29563       | CadSNP5158     | <i>Desi</i>      | Ca_Desig_Chr06               | 9811599                        | (G/A)       |

| <b>S.N.</b> | <b>SNP IDs</b> | <b>Cultivars</b> | <b>Chromosomes/scaffolds</b> | <b>Physical positions (bp)</b> | <b>SNPs</b> |
|-------------|----------------|------------------|------------------------------|--------------------------------|-------------|
| 29564       | CadSNP5159     | <i>Desi</i>      | Ca_Desig_Chr06               | 9860708                        | (G/A)       |
| 29565       | CadSNP5160     | <i>Desi</i>      | Ca_Desig_Chr06               | 9860679                        | (G/T)       |
| 29566       | CadSNP5161     | <i>Desi</i>      | Ca_Desig_Chr06               | 9860772                        | (A/G)       |
| 29567       | CadSNP5162     | <i>Desi</i>      | Ca_Desig_Chr06               | 9860717                        | (A/G)       |
| 29568       | CadSNP5163     | <i>Desi</i>      | Ca_Desig_Chr06               | 9867699                        | (A/C)       |
| 29569       | CadSNP5164     | <i>Desi</i>      | Ca_Desig_Chr06               | 9899142                        | (G/C)       |
| 29570       | CadSNP5165     | <i>Desi</i>      | Ca_Desig_Chr06               | 9899144                        | (A/C)       |
| 29571       | CadSNP5166     | <i>Desi</i>      | Ca_Desig_Chr06               | 9899151                        | (C/T)       |
| 29572       | CadSNP5167     | <i>Desi</i>      | Ca_Desig_Chr06               | 9904529                        | (T/G)       |
| 29573       | CadSNP5168     | <i>Desi</i>      | Ca_Desig_Chr06               | 9933849                        | (T/A)       |
| 29574       | CadSNP5169     | <i>Desi</i>      | Ca_Desig_Chr06               | 9933885                        | (C/T)       |
| 29575       | CadSNP5170     | <i>Desi</i>      | Ca_Desig_Chr06               | 9955274                        | (T/A)       |
| 29576       | CadSNP5171     | <i>Desi</i>      | Ca_Desig_Chr06               | 9955279                        | (C/T)       |
| 29577       | CadSNP5172     | <i>Desi</i>      | Ca_Desig_Chr06               | 9955323                        | (G/A)       |
| 29578       | CadSNP5173     | <i>Desi</i>      | Ca_Desig_Chr06               | 9967565                        | (T/C)       |
| 29579       | CadSNP5174     | <i>Desi</i>      | Ca_Desig_Chr06               | 9980914                        | (G/C)       |
| 29580       | CadSNP5175     | <i>Desi</i>      | Ca_Desig_Chr06               | 10095855                       | (A/T)       |
| 29581       | CadSNP5176     | <i>Desi</i>      | Ca_Desig_Chr06               | 10125293                       | (T/C)       |
| 29582       | CadSNP5177     | <i>Desi</i>      | Ca_Desig_Chr06               | 10167738                       | (C/T)       |
| 29583       | CadSNP5178     | <i>Desi</i>      | Ca_Desig_Chr06               | 10168581                       | (G/A)       |
| 29584       | CadSNP5179     | <i>Desi</i>      | Ca_Desig_Chr06               | 10172037                       | (G/T)       |
| 29585       | CadSNP5180     | <i>Desi</i>      | Ca_Desig_Chr06               | 10171978                       | (A/C)       |
| 29586       | CadSNP5181     | <i>Desi</i>      | Ca_Desig_Chr06               | 10255106                       | (C/T)       |
| 29587       | CadSNP5182     | <i>Desi</i>      | Ca_Desig_Chr06               | 10266811                       | (A/T)       |
| 29588       | CadSNP5183     | <i>Desi</i>      | Ca_Desig_Chr06               | 10266755                       | (T/G)       |
| 29589       | CadSNP5184     | <i>Desi</i>      | Ca_Desig_Chr06               | 10284428                       | (G/C)       |
| 29590       | CadSNP5185     | <i>Desi</i>      | Ca_Desig_Chr06               | 10284520                       | (T/C)       |
| 29591       | CadSNP5186     | <i>Desi</i>      | Ca_Desig_Chr06               | 10284872                       | (G/C)       |
| 29592       | CadSNP5187     | <i>Desi</i>      | Ca_Desig_Chr06               | 10296242                       | (C/A)       |
| 29593       | CadSNP5188     | <i>Desi</i>      | Ca_Desig_Chr06               | 10336871                       | (G/A)       |
| 29594       | CadSNP5189     | <i>Desi</i>      | Ca_Desig_Chr06               | 10337088                       | (G/A)       |
| 29595       | CadSNP5190     | <i>Desi</i>      | Ca_Desig_Chr06               | 10338805                       | (C/A)       |
| 29596       | CadSNP5191     | <i>Desi</i>      | Ca_Desig_Chr06               | 10338806                       | (T/G)       |
| 29597       | CadSNP5192     | <i>Desi</i>      | Ca_Desig_Chr06               | 10359730                       | (C/T)       |
| 29598       | CadSNP5193     | <i>Desi</i>      | Ca_Desig_Chr06               | 10366733                       | (A/C)       |
| 29599       | CadSNP5194     | <i>Desi</i>      | Ca_Desig_Chr06               | 10383897                       | (G/A)       |
| 29600       | CadSNP5195     | <i>Desi</i>      | Ca_Desig_Chr06               | 10461140                       | (G/A)       |
| 29601       | CadSNP5196     | <i>Desi</i>      | Ca_Desig_Chr06               | 10461698                       | (C/G)       |

| <b>S.N.</b> | <b>SNP IDs</b> | <b>Cultivars</b> | <b>Chromosomes/scaffolds</b> | <b>Physical positions (bp)</b> | <b>SNPs</b> |
|-------------|----------------|------------------|------------------------------|--------------------------------|-------------|
| 29602       | CadSNP5197     | <i>Desi</i>      | Ca_Desig_Chr06               | 10461701                       | (T/C)       |
| 29603       | CadSNP5198     | <i>Desi</i>      | Ca_Desig_Chr06               | 10577097                       | (C/T)       |
| 29604       | CadSNP5199     | <i>Desi</i>      | Ca_Desig_Chr06               | 10577165                       | (T/G)       |
| 29605       | CadSNP5200     | <i>Desi</i>      | Ca_Desig_Chr06               | 10577166                       | (A/G)       |
| 29606       | CadSNP5201     | <i>Desi</i>      | Ca_Desig_Chr06               | 10577168                       | (T/A)       |
| 29607       | CadSNP5202     | <i>Desi</i>      | Ca_Desig_Chr06               | 10596504                       | (T/G)       |
| 29608       | CadSNP5203     | <i>Desi</i>      | Ca_Desig_Chr06               | 10614096                       | (A/G)       |
| 29609       | CadSNP5204     | <i>Desi</i>      | Ca_Desig_Chr06               | 10614162                       | (A/C)       |
| 29610       | CadSNP5205     | <i>Desi</i>      | Ca_Desig_Chr06               | 10614225                       | (G/A)       |
| 29611       | CadSNP5206     | <i>Desi</i>      | Ca_Desig_Chr06               | 10614491                       | (A/C)       |
| 29612       | CadSNP5207     | <i>Desi</i>      | Ca_Desig_Chr06               | 10614489                       | (A/G)       |
| 29613       | CadSNP5208     | <i>Desi</i>      | Ca_Desig_Chr06               | 10614449                       | (C/G)       |
| 29614       | CadSNP5209     | <i>Desi</i>      | Ca_Desig_Chr06               | 10662775                       | (T/C)       |
| 29615       | CadSNP5210     | <i>Desi</i>      | Ca_Desig_Chr06               | 10662822                       | (G/T)       |
| 29616       | CadSNP5211     | <i>Desi</i>      | Ca_Desig_Chr06               | 10690866                       | (T/C)       |
| 29617       | CadSNP5212     | <i>Desi</i>      | Ca_Desig_Chr06               | 10703187                       | (A/G)       |
| 29618       | CadSNP5213     | <i>Desi</i>      | Ca_Desig_Chr06               | 10712250                       | (G/T)       |
| 29619       | CadSNP5214     | <i>Desi</i>      | Ca_Desig_Chr06               | 10712395                       | (G/A)       |
| 29620       | CadSNP5215     | <i>Desi</i>      | Ca_Desig_Chr06               | 10726489                       | (T/G)       |
| 29621       | CadSNP5216     | <i>Desi</i>      | Ca_Desig_Chr06               | 10777778                       | (C/T)       |
| 29622       | CadSNP5217     | <i>Desi</i>      | Ca_Desig_Chr06               | 10792360                       | (C/T)       |
| 29623       | CadSNP5218     | <i>Desi</i>      | Ca_Desig_Chr06               | 10830004                       | (T/C)       |
| 29624       | CadSNP5219     | <i>Desi</i>      | Ca_Desig_Chr06               | 10840928                       | (A/C)       |
| 29625       | CadSNP5220     | <i>Desi</i>      | Ca_Desig_Chr06               | 10840948                       | (C/G)       |
| 29626       | CadSNP5221     | <i>Desi</i>      | Ca_Desig_Chr06               | 10863945                       | (C/G)       |
| 29627       | CadSNP5222     | <i>Desi</i>      | Ca_Desig_Chr06               | 10864155                       | (T/A)       |
| 29628       | CadSNP5223     | <i>Desi</i>      | Ca_Desig_Chr06               | 10888231                       | (T/C)       |
| 29629       | CadSNP5224     | <i>Desi</i>      | Ca_Desig_Chr06               | 10928498                       | (C/T)       |
| 29630       | CadSNP5225     | <i>Desi</i>      | Ca_Desig_Chr06               | 10928544                       | (C/A)       |
| 29631       | CadSNP5226     | <i>Desi</i>      | Ca_Desig_Chr06               | 10928548                       | (C/A)       |
| 29632       | CadSNP5227     | <i>Desi</i>      | Ca_Desig_Chr06               | 10940419                       | (G/T)       |
| 29633       | CadSNP5228     | <i>Desi</i>      | Ca_Desig_Chr06               | 10949246                       | (A/G)       |
| 29634       | CadSNP5229     | <i>Desi</i>      | Ca_Desig_Chr06               | 11137301                       | (C/A)       |
| 29635       | CadSNP5230     | <i>Desi</i>      | Ca_Desig_Chr06               | 11137362                       | (C/A)       |
| 29636       | CadSNP5231     | <i>Desi</i>      | Ca_Desig_Chr06               | 11175957                       | (G/T)       |
| 29637       | CadSNP5232     | <i>Desi</i>      | Ca_Desig_Chr06               | 11175961                       | (G/A)       |
| 29638       | CadSNP5233     | <i>Desi</i>      | Ca_Desig_Chr06               | 11175980                       | (A/G)       |
| 29639       | CadSNP5234     | <i>Desi</i>      | Ca_Desig_Chr06               | 11175981                       | (T/C)       |

| <b>S.N.</b> | <b>SNP IDs</b> | <b>Cultivars</b> | <b>Chromosomes/scaffolds</b> | <b>Physical positions (bp)</b> | <b>SNPs</b> |
|-------------|----------------|------------------|------------------------------|--------------------------------|-------------|
| 29640       | CadSNP5235     | <i>Desi</i>      | Ca_Desig_Chr06               | 11175993                       | (C/A)       |
| 29641       | CadSNP5236     | <i>Desi</i>      | Ca_Desig_Chr06               | 11176003                       | (C/G)       |
| 29642       | CadSNP5237     | <i>Desi</i>      | Ca_Desig_Chr06               | 11176031                       | (A/G)       |
| 29643       | CadSNP5238     | <i>Desi</i>      | Ca_Desig_Chr06               | 11176039                       | (T/C)       |
| 29644       | CadSNP5239     | <i>Desi</i>      | Ca_Desig_Chr06               | 11176042                       | (A/G)       |
| 29645       | CadSNP5240     | <i>Desi</i>      | Ca_Desig_Chr06               | 11176040                       | (A/G)       |
| 29646       | CadSNP5241     | <i>Desi</i>      | Ca_Desig_Chr06               | 11176037                       | (A/T)       |
| 29647       | CadSNP5242     | <i>Desi</i>      | Ca_Desig_Chr06               | 11215916                       | (C/G)       |
| 29648       | CadSNP5243     | <i>Desi</i>      | Ca_Desig_Chr06               | 11337880                       | (G/A)       |
| 29649       | CadSNP5244     | <i>Desi</i>      | Ca_Desig_Chr06               | 11339684                       | (A/G)       |
| 29650       | CadSNP5245     | <i>Desi</i>      | Ca_Desig_Chr06               | 11339720                       | (A/T)       |
| 29651       | CadSNP5246     | <i>Desi</i>      | Ca_Desig_Chr06               | 11343524                       | (T/C)       |
| 29652       | CadSNP5247     | <i>Desi</i>      | Ca_Desig_Chr06               | 11350128                       | (A/C)       |
| 29653       | CadSNP5248     | <i>Desi</i>      | Ca_Desig_Chr06               | 11352403                       | (G/T)       |
| 29654       | CadSNP5249     | <i>Desi</i>      | Ca_Desig_Chr06               | 11414663                       | (G/T)       |
| 29655       | CadSNP5250     | <i>Desi</i>      | Ca_Desig_Chr06               | 11414655                       | (A/C)       |
| 29656       | CadSNP5251     | <i>Desi</i>      | Ca_Desig_Chr06               | 11427044                       | (T/C)       |
| 29657       | CadSNP5252     | <i>Desi</i>      | Ca_Desig_Chr06               | 11427072                       | (A/T)       |
| 29658       | CadSNP5253     | <i>Desi</i>      | Ca_Desig_Chr06               | 11427154                       | (G/A)       |
| 29659       | CadSNP5254     | <i>Desi</i>      | Ca_Desig_Chr06               | 11453999                       | (A/G)       |
| 29660       | CadSNP5255     | <i>Desi</i>      | Ca_Desig_Chr06               | 11476194                       | (A/G)       |
| 29661       | CadSNP5256     | <i>Desi</i>      | Ca_Desig_Chr07               | 165727                         | (T/G)       |
| 29662       | CadSNP5257     | <i>Desi</i>      | Ca_Desig_Chr07               | 174201                         | (A/G)       |
| 29663       | CadSNP5258     | <i>Desi</i>      | Ca_Desig_Chr07               | 176584                         | (G/A)       |
| 29664       | CadSNP5259     | <i>Desi</i>      | Ca_Desig_Chr07               | 235526                         | (T/C)       |
| 29665       | CadSNP5260     | <i>Desi</i>      | Ca_Desig_Chr07               | 235529                         | (T/C)       |
| 29666       | CadSNP5261     | <i>Desi</i>      | Ca_Desig_Chr07               | 246172                         | (A/C)       |
| 29667       | CadSNP5262     | <i>Desi</i>      | Ca_Desig_Chr07               | 282539                         | (T/C)       |
| 29668       | CadSNP5263     | <i>Desi</i>      | Ca_Desig_Chr07               | 355245                         | (A/G)       |
| 29669       | CadSNP5264     | <i>Desi</i>      | Ca_Desig_Chr07               | 378918                         | (G/A)       |
| 29670       | CadSNP5265     | <i>Desi</i>      | Ca_Desig_Chr07               | 386668                         | (G/C)       |
| 29671       | CadSNP5266     | <i>Desi</i>      | Ca_Desig_Chr07               | 386767                         | (T/C)       |
| 29672       | CadSNP5267     | <i>Desi</i>      | Ca_Desig_Chr07               | 386754                         | (C/A)       |
| 29673       | CadSNP5268     | <i>Desi</i>      | Ca_Desig_Chr07               | 386772                         | (A/G)       |
| 29674       | CadSNP5269     | <i>Desi</i>      | Ca_Desig_Chr07               | 398327                         | (G/T)       |
| 29675       | CadSNP5270     | <i>Desi</i>      | Ca_Desig_Chr07               | 423139                         | (C/A)       |
| 29676       | CadSNP5271     | <i>Desi</i>      | Ca_Desig_Chr07               | 423208                         | (A/C)       |
| 29677       | CadSNP5272     | <i>Desi</i>      | Ca_Desig_Chr07               | 423296                         | (C/G)       |

| <b>S.N.</b> | <b>SNP IDs</b> | <b>Cultivars</b> | <b>Chromosomes/scaffolds</b> | <b>Physical positions (bp)</b> | <b>SNPs</b> |
|-------------|----------------|------------------|------------------------------|--------------------------------|-------------|
| 29678       | CadSNP5273     | <i>Desi</i>      | Ca_Desig_Chr07               | 585356                         | (G/A)       |
| 29679       | CadSNP5274     | <i>Desi</i>      | Ca_Desig_Chr07               | 586999                         | (C/T)       |
| 29680       | CadSNP5275     | <i>Desi</i>      | Ca_Desig_Chr07               | 587013                         | (C/A)       |
| 29681       | CadSNP5276     | <i>Desi</i>      | Ca_Desig_Chr07               | 640796                         | (T/C)       |
| 29682       | CadSNP5277     | <i>Desi</i>      | Ca_Desig_Chr07               | 691252                         | (A/G)       |
| 29683       | CadSNP5278     | <i>Desi</i>      | Ca_Desig_Chr07               | 691183                         | (C/T)       |
| 29684       | CadSNP5279     | <i>Desi</i>      | Ca_Desig_Chr07               | 694654                         | (C/T)       |
| 29685       | CadSNP5280     | <i>Desi</i>      | Ca_Desig_Chr07               | 694650                         | (A/G)       |
| 29686       | CadSNP5281     | <i>Desi</i>      | Ca_Desig_Chr07               | 734971                         | (C/G)       |
| 29687       | CadSNP5282     | <i>Desi</i>      | Ca_Desig_Chr07               | 740393                         | (A/G)       |
| 29688       | CadSNP5283     | <i>Desi</i>      | Ca_Desig_Chr07               | 740412                         | (T/G)       |
| 29689       | CadSNP5284     | <i>Desi</i>      | Ca_Desig_Chr07               | 740512                         | (G/A)       |
| 29690       | CadSNP5285     | <i>Desi</i>      | Ca_Desig_Chr07               | 747281                         | (T/C)       |
| 29691       | CadSNP5286     | <i>Desi</i>      | Ca_Desig_Chr07               | 784246                         | (T/C)       |
| 29692       | CadSNP5287     | <i>Desi</i>      | Ca_Desig_Chr07               | 830276                         | (G/A)       |
| 29693       | CadSNP5288     | <i>Desi</i>      | Ca_Desig_Chr07               | 830290                         | (G/T)       |
| 29694       | CadSNP5289     | <i>Desi</i>      | Ca_Desig_Chr07               | 843874                         | (C/T)       |
| 29695       | CadSNP5290     | <i>Desi</i>      | Ca_Desig_Chr07               | 843865                         | (A/T)       |
| 29696       | CadSNP5291     | <i>Desi</i>      | Ca_Desig_Chr07               | 843832                         | (C/T)       |
| 29697       | CadSNP5292     | <i>Desi</i>      | Ca_Desig_Chr07               | 905394                         | (T/C)       |
| 29698       | CadSNP5293     | <i>Desi</i>      | Ca_Desig_Chr07               | 905361                         | (T/A)       |
| 29699       | CadSNP5294     | <i>Desi</i>      | Ca_Desig_Chr07               | 1024728                        | (T/G)       |
| 29700       | CadSNP5295     | <i>Desi</i>      | Ca_Desig_Chr07               | 1050542                        | (A/T)       |
| 29701       | CadSNP5296     | <i>Desi</i>      | Ca_Desig_Chr07               | 1050556                        | (G/T)       |
| 29702       | CadSNP5297     | <i>Desi</i>      | Ca_Desig_Chr07               | 1050560                        | (C/T)       |
| 29703       | CadSNP5298     | <i>Desi</i>      | Ca_Desig_Chr07               | 1050574                        | (C/T)       |
| 29704       | CadSNP5299     | <i>Desi</i>      | Ca_Desig_Chr07               | 1050522                        | (C/T)       |
| 29705       | CadSNP5300     | <i>Desi</i>      | Ca_Desig_Chr07               | 1050521                        | (C/G)       |
| 29706       | CadSNP5301     | <i>Desi</i>      | Ca_Desig_Chr07               | 1414396                        | (T/G)       |
| 29707       | CadSNP5302     | <i>Desi</i>      | Ca_Desig_Chr07               | 1415410                        | (A/C)       |
| 29708       | CadSNP5303     | <i>Desi</i>      | Ca_Desig_Chr07               | 1415425                        | (G/T)       |
| 29709       | CadSNP5304     | <i>Desi</i>      | Ca_Desig_Chr07               | 1443859                        | (T/G)       |
| 29710       | CadSNP5305     | <i>Desi</i>      | Ca_Desig_Chr07               | 1457985                        | (A/G)       |
| 29711       | CadSNP5306     | <i>Desi</i>      | Ca_Desig_Chr07               | 1467358                        | (T/A)       |
| 29712       | CadSNP5307     | <i>Desi</i>      | Ca_Desig_Chr07               | 1467400                        | (A/G)       |
| 29713       | CadSNP5308     | <i>Desi</i>      | Ca_Desig_Chr07               | 1541580                        | (A/T)       |
| 29714       | CadSNP5309     | <i>Desi</i>      | Ca_Desig_Chr07               | 1541646                        | (C/G)       |
| 29715       | CadSNP5310     | <i>Desi</i>      | Ca_Desig_Chr07               | 1558720                        | (T/G)       |



| <b>S.N.</b> | <b>SNP IDs</b> | <b>Cultivars</b> | <b>Chromosomes/scaffolds</b> | <b>Physical positions (bp)</b> | <b>SNPs</b> |
|-------------|----------------|------------------|------------------------------|--------------------------------|-------------|
| 29716       | CadSNP5311     | <i>Desi</i>      | Ca_Desig_Chr07               | 1558730                        | (T/G)       |
| 29717       | CadSNP5312     | <i>Desi</i>      | Ca_Desig_Chr07               | 1558747                        | (T/G)       |
| 29718       | CadSNP5313     | <i>Desi</i>      | Ca_Desig_Chr07               | 1558761                        | (T/G)       |
| 29719       | CadSNP5314     | <i>Desi</i>      | Ca_Desig_Chr07               | 1559999                        | (A/T)       |
| 29720       | CadSNP5315     | <i>Desi</i>      | Ca_Desig_Chr07               | 1566076                        | (T/G)       |
| 29721       | CadSNP5316     | <i>Desi</i>      | Ca_Desig_Chr07               | 1566205                        | (C/T)       |
| 29722       | CadSNP5317     | <i>Desi</i>      | Ca_Desig_Chr07               | 1566200                        | (T/C)       |
| 29723       | CadSNP5318     | <i>Desi</i>      | Ca_Desig_Chr07               | 1566197                        | (G/A)       |
| 29724       | CadSNP5319     | <i>Desi</i>      | Ca_Desig_Chr07               | 1566167                        | (C/A)       |
| 29725       | CadSNP5320     | <i>Desi</i>      | Ca_Desig_Chr07               | 1566154                        | (G/T)       |
| 29726       | CadSNP5321     | <i>Desi</i>      | Ca_Desig_Chr07               | 1566140                        | (C/T)       |
| 29727       | CadSNP5322     | <i>Desi</i>      | Ca_Desig_Chr07               | 1566135                        | (C/T)       |
| 29728       | CadSNP5323     | <i>Desi</i>      | Ca_Desig_Chr07               | 1566133                        | (T/C)       |
| 29729       | CadSNP5324     | <i>Desi</i>      | Ca_Desig_Chr07               | 1566127                        | (A/T)       |
| 29730       | CadSNP5325     | <i>Desi</i>      | Ca_Desig_Chr07               | 1566215                        | (C/T)       |
| 29731       | CadSNP5326     | <i>Desi</i>      | Ca_Desig_Chr07               | 1577711                        | (T/C)       |
| 29732       | CadSNP5327     | <i>Desi</i>      | Ca_Desig_Chr07               | 1594798                        | (G/A)       |
| 29733       | CadSNP5328     | <i>Desi</i>      | Ca_Desig_Chr07               | 1594765                        | (T/A)       |
| 29734       | CadSNP5329     | <i>Desi</i>      | Ca_Desig_Chr07               | 1594757                        | (C/T)       |
| 29735       | CadSNP5330     | <i>Desi</i>      | Ca_Desig_Chr07               | 1594746                        | (C/T)       |
| 29736       | CadSNP5331     | <i>Desi</i>      | Ca_Desig_Chr07               | 1594736                        | (C/T)       |
| 29737       | CadSNP5332     | <i>Desi</i>      | Ca_Desig_Chr07               | 1619971                        | (T/C)       |
| 29738       | CadSNP5333     | <i>Desi</i>      | Ca_Desig_Chr07               | 1619986                        | (A/T)       |
| 29739       | CadSNP5334     | <i>Desi</i>      | Ca_Desig_Chr07               | 1631320                        | (G/A)       |
| 29740       | CadSNP5335     | <i>Desi</i>      | Ca_Desig_Chr07               | 1631837                        | (C/T)       |
| 29741       | CadSNP5336     | <i>Desi</i>      | Ca_Desig_Chr07               | 1631890                        | (C/T)       |
| 29742       | CadSNP5337     | <i>Desi</i>      | Ca_Desig_Chr07               | 1631981                        | (T/C)       |
| 29743       | CadSNP5338     | <i>Desi</i>      | Ca_Desig_Chr07               | 1631901                        | (G/C)       |
| 29744       | CadSNP5339     | <i>Desi</i>      | Ca_Desig_Chr07               | 1634405                        | (T/C)       |
| 29745       | CadSNP5340     | <i>Desi</i>      | Ca_Desig_Chr07               | 1634790                        | (G/A)       |
| 29746       | CadSNP5341     | <i>Desi</i>      | Ca_Desig_Chr07               | 1635022                        | (G/A)       |
| 29747       | CadSNP5342     | <i>Desi</i>      | Ca_Desig_Chr07               | 1668177                        | (T/C)       |
| 29748       | CadSNP5343     | <i>Desi</i>      | Ca_Desig_Chr07               | 1740436                        | (G/A)       |
| 29749       | CadSNP5344     | <i>Desi</i>      | Ca_Desig_Chr07               | 1740458                        | (A/G)       |
| 29750       | CadSNP5345     | <i>Desi</i>      | Ca_Desig_Chr07               | 1744177                        | (C/T)       |
| 29751       | CadSNP5346     | <i>Desi</i>      | Ca_Desig_Chr07               | 1756978                        | (A/G)       |
| 29752       | CadSNP5347     | <i>Desi</i>      | Ca_Desig_Chr07               | 1763110                        | (C/T)       |
| 29753       | CadSNP5348     | <i>Desi</i>      | Ca_Desig_Chr07               | 1763125                        | (A/G)       |

| <b>S.N.</b> | <b>SNP IDs</b> | <b>Cultivars</b> | <b>Chromosomes/scaffolds</b> | <b>Physical positions (bp)</b> | <b>SNPs</b> |
|-------------|----------------|------------------|------------------------------|--------------------------------|-------------|
| 29754       | CadSNP5349     | <i>Desi</i>      | Ca_Desig_Chr07               | 1763146                        | (G/A)       |
| 29755       | CadSNP5350     | <i>Desi</i>      | Ca_Desig_Chr07               | 1763149                        | (T/C)       |
| 29756       | CadSNP5351     | <i>Desi</i>      | Ca_Desig_Chr07               | 1763162                        | (C/A)       |
| 29757       | CadSNP5352     | <i>Desi</i>      | Ca_Desig_Chr07               | 1763170                        | (C/T)       |
| 29758       | CadSNP5353     | <i>Desi</i>      | Ca_Desig_Chr07               | 1763172                        | (T/G)       |
| 29759       | CadSNP5354     | <i>Desi</i>      | Ca_Desig_Chr07               | 1763185                        | (T/A)       |
| 29760       | CadSNP5355     | <i>Desi</i>      | Ca_Desig_Chr07               | 1763235                        | (A/G)       |
| 29761       | CadSNP5356     | <i>Desi</i>      | Ca_Desig_Chr07               | 1828924                        | (C/T)       |
| 29762       | CadSNP5357     | <i>Desi</i>      | Ca_Desig_Chr07               | 1828930                        | (C/T)       |
| 29763       | CadSNP5358     | <i>Desi</i>      | Ca_Desig_Chr07               | 1828976                        | (C/T)       |
| 29764       | CadSNP5359     | <i>Desi</i>      | Ca_Desig_Chr07               | 1832837                        | (G/T)       |
| 29765       | CadSNP5360     | <i>Desi</i>      | Ca_Desig_Chr07               | 1832836                        | (T/C)       |
| 29766       | CadSNP5361     | <i>Desi</i>      | Ca_Desig_Chr07               | 1832832                        | (A/C)       |
| 29767       | CadSNP5362     | <i>Desi</i>      | Ca_Desig_Chr07               | 1875145                        | (A/G)       |
| 29768       | CadSNP5363     | <i>Desi</i>      | Ca_Desig_Chr07               | 1875262                        | (A/G)       |
| 29769       | CadSNP5364     | <i>Desi</i>      | Ca_Desig_Chr07               | 1875215                        | (T/C)       |
| 29770       | CadSNP5365     | <i>Desi</i>      | Ca_Desig_Chr07               | 1875372                        | (C/T)       |
| 29771       | CadSNP5366     | <i>Desi</i>      | Ca_Desig_Chr07               | 1891663                        | (G/A)       |
| 29772       | CadSNP5367     | <i>Desi</i>      | Ca_Desig_Chr07               | 1908424                        | (T/C)       |
| 29773       | CadSNP5368     | <i>Desi</i>      | Ca_Desig_Chr07               | 1908420                        | (A/T)       |
| 29774       | CadSNP5369     | <i>Desi</i>      | Ca_Desig_Chr07               | 1908411                        | (C/T)       |
| 29775       | CadSNP5370     | <i>Desi</i>      | Ca_Desig_Chr07               | 1909090                        | (A/G)       |
| 29776       | CadSNP5371     | <i>Desi</i>      | Ca_Desig_Chr07               | 1909135                        | (T/G)       |
| 29777       | CadSNP5372     | <i>Desi</i>      | Ca_Desig_Chr07               | 1997429                        | (G/A)       |
| 29778       | CadSNP5373     | <i>Desi</i>      | Ca_Desig_Chr07               | 2018132                        | (C/G)       |
| 29779       | CadSNP5374     | <i>Desi</i>      | Ca_Desig_Chr07               | 2019098                        | (T/C)       |
| 29780       | CadSNP5375     | <i>Desi</i>      | Ca_Desig_Chr07               | 2042866                        | (G/A)       |
| 29781       | CadSNP5376     | <i>Desi</i>      | Ca_Desig_Chr07               | 2042901                        | (G/A)       |
| 29782       | CadSNP5377     | <i>Desi</i>      | Ca_Desig_Chr07               | 2042915                        | (A/G)       |
| 29783       | CadSNP5378     | <i>Desi</i>      | Ca_Desig_Chr07               | 2042936                        | (T/G)       |
| 29784       | CadSNP5379     | <i>Desi</i>      | Ca_Desig_Chr07               | 2043017                        | (G/C)       |
| 29785       | CadSNP5380     | <i>Desi</i>      | Ca_Desig_Chr07               | 2043058                        | (G/A)       |
| 29786       | CadSNP5381     | <i>Desi</i>      | Ca_Desig_Chr07               | 2047543                        | (G/A)       |
| 29787       | CadSNP5382     | <i>Desi</i>      | Ca_Desig_Chr07               | 2047564                        | (A/G)       |
| 29788       | CadSNP5383     | <i>Desi</i>      | Ca_Desig_Chr07               | 2047588                        | (G/A)       |
| 29789       | CadSNP5384     | <i>Desi</i>      | Ca_Desig_Chr07               | 2051063                        | (T/C)       |
| 29790       | CadSNP5385     | <i>Desi</i>      | Ca_Desig_Chr07               | 2069964                        | (A/G)       |
| 29791       | CadSNP5386     | <i>Desi</i>      | Ca_Desig_Chr07               | 2070162                        | (G/C)       |

| <b>S.N.</b> | <b>SNP IDs</b> | <b>Cultivars</b> | <b>Chromosomes/scaffolds</b> | <b>Physical positions (bp)</b> | <b>SNPs</b> |
|-------------|----------------|------------------|------------------------------|--------------------------------|-------------|
| 29792       | CadSNP5387     | <i>Desi</i>      | Ca_Desig_Chr07               | 2127268                        | (G/A)       |
| 29793       | CadSNP5388     | <i>Desi</i>      | Ca_Desig_Chr07               | 2127247                        | (G/T)       |
| 29794       | CadSNP5389     | <i>Desi</i>      | Ca_Desig_Chr07               | 2127236                        | (C/T)       |
| 29795       | CadSNP5390     | <i>Desi</i>      | Ca_Desig_Chr07               | 2196338                        | (T/C)       |
| 29796       | CadSNP5391     | <i>Desi</i>      | Ca_Desig_Chr07               | 2196461                        | (C/A)       |
| 29797       | CadSNP5392     | <i>Desi</i>      | Ca_Desig_Chr07               | 2196469                        | (G/A)       |
| 29798       | CadSNP5393     | <i>Desi</i>      | Ca_Desig_Chr07               | 2196513                        | (C/G)       |
| 29799       | CadSNP5394     | <i>Desi</i>      | Ca_Desig_Chr07               | 2196668                        | (G/C)       |
| 29800       | CadSNP5395     | <i>Desi</i>      | Ca_Desig_Chr07               | 2212415                        | (G/T)       |
| 29801       | CadSNP5396     | <i>Desi</i>      | Ca_Desig_Chr07               | 2226295                        | (A/G)       |
| 29802       | CadSNP5397     | <i>Desi</i>      | Ca_Desig_Chr07               | 2295248                        | (T/C)       |
| 29803       | CadSNP5398     | <i>Desi</i>      | Ca_Desig_Chr07               | 2295255                        | (T/G)       |
| 29804       | CadSNP5399     | <i>Desi</i>      | Ca_Desig_Chr07               | 2295262                        | (T/C)       |
| 29805       | CadSNP5400     | <i>Desi</i>      | Ca_Desig_Chr07               | 2374502                        | (G/A)       |
| 29806       | CadSNP5401     | <i>Desi</i>      | Ca_Desig_Chr07               | 2391778                        | (T/G)       |
| 29807       | CadSNP5402     | <i>Desi</i>      | Ca_Desig_Chr07               | 2541409                        | (G/C)       |
| 29808       | CadSNP5403     | <i>Desi</i>      | Ca_Desig_Chr07               | 2541377                        | (G/A)       |
| 29809       | CadSNP5404     | <i>Desi</i>      | Ca_Desig_Chr07               | 2541403                        | (A/G)       |
| 29810       | CadSNP5405     | <i>Desi</i>      | Ca_Desig_Chr07               | 2541486                        | (T/G)       |
| 29811       | CadSNP5406     | <i>Desi</i>      | Ca_Desig_Chr07               | 2642039                        | (T/C)       |
| 29812       | CadSNP5407     | <i>Desi</i>      | Ca_Desig_Chr07               | 2642183                        | (T/C)       |
| 29813       | CadSNP5408     | <i>Desi</i>      | Ca_Desig_Chr07               | 2642151                        | (T/C)       |
| 29814       | CadSNP5409     | <i>Desi</i>      | Ca_Desig_Chr07               | 2675261                        | (C/T)       |
| 29815       | CadSNP5410     | <i>Desi</i>      | Ca_Desig_Chr07               | 2677038                        | (T/A)       |
| 29816       | CadSNP5411     | <i>Desi</i>      | Ca_Desig_Chr07               | 2683264                        | (T/C)       |
| 29817       | CadSNP5412     | <i>Desi</i>      | Ca_Desig_Chr07               | 2697791                        | (C/T)       |
| 29818       | CadSNP5413     | <i>Desi</i>      | Ca_Desig_Chr07               | 2697838                        | (C/T)       |
| 29819       | CadSNP5414     | <i>Desi</i>      | Ca_Desig_Chr07               | 2705550                        | (A/G)       |
| 29820       | CadSNP5415     | <i>Desi</i>      | Ca_Desig_Chr07               | 2705542                        | (A/C)       |
| 29821       | CadSNP5416     | <i>Desi</i>      | Ca_Desig_Chr07               | 2707617                        | (A/C)       |
| 29822       | CadSNP5417     | <i>Desi</i>      | Ca_Desig_Chr07               | 2734204                        | (T/C)       |
| 29823       | CadSNP5418     | <i>Desi</i>      | Ca_Desig_Chr07               | 2754597                        | (C/T)       |
| 29824       | CadSNP5419     | <i>Desi</i>      | Ca_Desig_Chr07               | 2889767                        | (G/A)       |
| 29825       | CadSNP5420     | <i>Desi</i>      | Ca_Desig_Chr07               | 2895697                        | (T/G)       |
| 29826       | CadSNP5421     | <i>Desi</i>      | Ca_Desig_Chr07               | 2895732                        | (G/A)       |
| 29827       | CadSNP5422     | <i>Desi</i>      | Ca_Desig_Chr07               | 2895739                        | (A/G)       |
| 29828       | CadSNP5423     | <i>Desi</i>      | Ca_Desig_Chr07               | 2944478                        | (G/A)       |
| 29829       | CadSNP5424     | <i>Desi</i>      | Ca_Desig_Chr07               | 2952100                        | (C/T)       |

| <b>S.N.</b> | <b>SNP IDs</b> | <b>Cultivars</b> | <b>Chromosomes/scaffolds</b> | <b>Physical positions (bp)</b> | <b>SNPs</b> |
|-------------|----------------|------------------|------------------------------|--------------------------------|-------------|
| 29830       | CadSNP5425     | <i>Desi</i>      | Ca_Desig_Chr07               | 2952135                        | (G/C)       |
| 29831       | CadSNP5426     | <i>Desi</i>      | Ca_Desig_Chr07               | 2952140                        | (G/A)       |
| 29832       | CadSNP5427     | <i>Desi</i>      | Ca_Desig_Chr07               | 2952185                        | (A/T)       |
| 29833       | CadSNP5428     | <i>Desi</i>      | Ca_Desig_Chr07               | 2952174                        | (C/G)       |
| 29834       | CadSNP5429     | <i>Desi</i>      | Ca_Desig_Chr07               | 3018239                        | (C/T)       |
| 29835       | CadSNP5430     | <i>Desi</i>      | Ca_Desig_Chr07               | 3021483                        | (C/G)       |
| 29836       | CadSNP5431     | <i>Desi</i>      | Ca_Desig_Chr07               | 3021608                        | (T/G)       |
| 29837       | CadSNP5432     | <i>Desi</i>      | Ca_Desig_Chr07               | 3026817                        | (T/C)       |
| 29838       | CadSNP5433     | <i>Desi</i>      | Ca_Desig_Chr07               | 3043905                        | (T/C)       |
| 29839       | CadSNP5434     | <i>Desi</i>      | Ca_Desig_Chr07               | 3043956                        | (G/A)       |
| 29840       | CadSNP5435     | <i>Desi</i>      | Ca_Desig_Chr07               | 3044006                        | (C/A)       |
| 29841       | CadSNP5436     | <i>Desi</i>      | Ca_Desig_Chr07               | 3046607                        | (G/C)       |
| 29842       | CadSNP5437     | <i>Desi</i>      | Ca_Desig_Chr07               | 3123543                        | (G/A)       |
| 29843       | CadSNP5438     | <i>Desi</i>      | Ca_Desig_Chr07               | 3136837                        | (T/G)       |
| 29844       | CadSNP5439     | <i>Desi</i>      | Ca_Desig_Chr07               | 3167742                        | (T/A)       |
| 29845       | CadSNP5440     | <i>Desi</i>      | Ca_Desig_Chr07               | 3167835                        | (T/A)       |
| 29846       | CadSNP5441     | <i>Desi</i>      | Ca_Desig_Chr07               | 3167846                        | (C/T)       |
| 29847       | CadSNP5442     | <i>Desi</i>      | Ca_Desig_Chr07               | 3452752                        | (A/C)       |
| 29848       | CadSNP5443     | <i>Desi</i>      | Ca_Desig_Chr07               | 3479869                        | (A/G)       |
| 29849       | CadSNP5444     | <i>Desi</i>      | Ca_Desig_Chr07               | 3484976                        | (A/C)       |
| 29850       | CadSNP5445     | <i>Desi</i>      | Ca_Desig_Chr07               | 3529309                        | (C/A)       |
| 29851       | CadSNP5446     | <i>Desi</i>      | Ca_Desig_Chr07               | 3529310                        | (A/G)       |
| 29852       | CadSNP5447     | <i>Desi</i>      | Ca_Desig_Chr07               | 3529311                        | (G/A)       |
| 29853       | CadSNP5448     | <i>Desi</i>      | Ca_Desig_Chr07               | 3671126                        | (A/C)       |
| 29854       | CadSNP5449     | <i>Desi</i>      | Ca_Desig_Chr07               | 3675434                        | (G/C)       |
| 29855       | CadSNP5450     | <i>Desi</i>      | Ca_Desig_Chr07               | 3707082                        | (G/A)       |
| 29856       | CadSNP5451     | <i>Desi</i>      | Ca_Desig_Chr07               | 3826701                        | (C/G)       |
| 29857       | CadSNP5452     | <i>Desi</i>      | Ca_Desig_Chr07               | 3837049                        | (T/G)       |
| 29858       | CadSNP5453     | <i>Desi</i>      | Ca_Desig_Chr07               | 3918621                        | (A/G)       |
| 29859       | CadSNP5454     | <i>Desi</i>      | Ca_Desig_Chr07               | 4142638                        | (T/G)       |
| 29860       | CadSNP5455     | <i>Desi</i>      | Ca_Desig_Chr07               | 4237004                        | (G/A)       |
| 29861       | CadSNP5456     | <i>Desi</i>      | Ca_Desig_Chr07               | 4468480                        | (T/G)       |
| 29862       | CadSNP5457     | <i>Desi</i>      | Ca_Desig_Chr07               | 4468472                        | (T/C)       |
| 29863       | CadSNP5458     | <i>Desi</i>      | Ca_Desig_Chr07               | 4695102                        | (T/C)       |
| 29864       | CadSNP5459     | <i>Desi</i>      | Ca_Desig_Chr07               | 4721475                        | (G/T)       |
| 29865       | CadSNP5460     | <i>Desi</i>      | Ca_Desig_Chr07               | 4729300                        | (T/G)       |
| 29866       | CadSNP5461     | <i>Desi</i>      | Ca_Desig_Chr07               | 4734272                        | (C/G)       |
| 29867       | CadSNP5462     | <i>Desi</i>      | Ca_Desig_Chr07               | 4734309                        | (A/G)       |

| <b>S.N.</b> | <b>SNP IDs</b> | <b>Cultivars</b> | <b>Chromosomes/scaffolds</b> | <b>Physical positions (bp)</b> | <b>SNPs</b> |
|-------------|----------------|------------------|------------------------------|--------------------------------|-------------|
| 29868       | CadSNP5463     | <i>Desi</i>      | Ca_Desig_Chr07               | 4997828                        | (C/A)       |
| 29869       | CadSNP5464     | <i>Desi</i>      | Ca_Desig_Chr07               | 4997829                        | (A/G)       |
| 29870       | CadSNP5465     | <i>Desi</i>      | Ca_Desig_Chr07               | 5032996                        | (A/G)       |
| 29871       | CadSNP5466     | <i>Desi</i>      | Ca_Desig_Chr07               | 5032992                        | (T/G)       |
| 29872       | CadSNP5467     | <i>Desi</i>      | Ca_Desig_Chr07               | 5032989                        | (A/G)       |
| 29873       | CadSNP5468     | <i>Desi</i>      | Ca_Desig_Chr07               | 5097674                        | (T/C)       |
| 29874       | CadSNP5469     | <i>Desi</i>      | Ca_Desig_Chr07               | 5137821                        | (C/T)       |
| 29875       | CadSNP5470     | <i>Desi</i>      | Ca_Desig_Chr07               | 5138627                        | (G/A)       |
| 29876       | CadSNP5471     | <i>Desi</i>      | Ca_Desig_Chr07               | 5230929                        | (A/G)       |
| 29877       | CadSNP5472     | <i>Desi</i>      | Ca_Desig_Chr07               | 5230972                        | (A/C)       |
| 29878       | CadSNP5473     | <i>Desi</i>      | Ca_Desig_Chr07               | 5231009                        | (A/G)       |
| 29879       | CadSNP5474     | <i>Desi</i>      | Ca_Desig_Chr07               | 5291199                        | (T/C)       |
| 29880       | CadSNP5475     | <i>Desi</i>      | Ca_Desig_Chr07               | 5298156                        | (A/G)       |
| 29881       | CadSNP5476     | <i>Desi</i>      | Ca_Desig_Chr07               | 5332131                        | (G/A)       |
| 29882       | CadSNP5477     | <i>Desi</i>      | Ca_Desig_Chr07               | 5332122                        | (G/A)       |
| 29883       | CadSNP5478     | <i>Desi</i>      | Ca_Desig_Chr07               | 5332139                        | (C/A)       |
| 29884       | CadSNP5479     | <i>Desi</i>      | Ca_Desig_Chr07               | 5545838                        | (C/T)       |
| 29885       | CadSNP5480     | <i>Desi</i>      | Ca_Desig_Chr07               | 5602192                        | (A/T)       |
| 29886       | CadSNP5481     | <i>Desi</i>      | Ca_Desig_Chr07               | 5617598                        | (C/G)       |
| 29887       | CadSNP5482     | <i>Desi</i>      | Ca_Desig_Chr07               | 5617695                        | (T/G)       |
| 29888       | CadSNP5483     | <i>Desi</i>      | Ca_Desig_Chr07               | 5645816                        | (T/G)       |
| 29889       | CadSNP5484     | <i>Desi</i>      | Ca_Desig_Chr07               | 5750920                        | (A/T)       |
| 29890       | CadSNP5485     | <i>Desi</i>      | Ca_Desig_Chr07               | 5826572                        | (A/C)       |
| 29891       | CadSNP5486     | <i>Desi</i>      | Ca_Desig_Chr07               | 5882273                        | (T/C)       |
| 29892       | CadSNP5487     | <i>Desi</i>      | Ca_Desig_Chr07               | 6048147                        | (A/C)       |
| 29893       | CadSNP5488     | <i>Desi</i>      | Ca_Desig_Chr07               | 6074943                        | (A/C)       |
| 29894       | CadSNP5489     | <i>Desi</i>      | Ca_Desig_Chr07               | 6093893                        | (A/C)       |
| 29895       | CadSNP5490     | <i>Desi</i>      | Ca_Desig_Chr07               | 6099596                        | (T/C)       |
| 29896       | CadSNP5491     | <i>Desi</i>      | Ca_Desig_Chr07               | 6136605                        | (C/T)       |
| 29897       | CadSNP5492     | <i>Desi</i>      | Ca_Desig_Chr07               | 6179264                        | (G/A)       |
| 29898       | CadSNP5493     | <i>Desi</i>      | Ca_Desig_Chr07               | 6179263                        | (A/C)       |
| 29899       | CadSNP5494     | <i>Desi</i>      | Ca_Desig_Chr07               | 6252926                        | (A/C)       |
| 29900       | CadSNP5495     | <i>Desi</i>      | Ca_Desig_Chr07               | 6252949                        | (C/G)       |
| 29901       | CadSNP5496     | <i>Desi</i>      | Ca_Desig_Chr07               | 6252943                        | (G/A)       |
| 29902       | CadSNP5497     | <i>Desi</i>      | Ca_Desig_Chr07               | 6252936                        | (T/C)       |
| 29903       | CadSNP5498     | <i>Desi</i>      | Ca_Desig_Chr07               | 6268895                        | (C/T)       |
| 29904       | CadSNP5499     | <i>Desi</i>      | Ca_Desig_Chr07               | 6268912                        | (T/G)       |
| 29905       | CadSNP5500     | <i>Desi</i>      | Ca_Desig_Chr07               | 6271299                        | (A/T)       |

| <b>S.N.</b> | <b>SNP IDs</b> | <b>Cultivars</b> | <b>Chromosomes/scaffolds</b> | <b>Physical positions (bp)</b> | <b>SNPs</b> |
|-------------|----------------|------------------|------------------------------|--------------------------------|-------------|
| 29906       | CadSNP5501     | <i>Desi</i>      | Ca_Desig_Chr07               | 6439959                        | (G/T)       |
| 29907       | CadSNP5502     | <i>Desi</i>      | Ca_Desig_Chr07               | 6440584                        | (A/G)       |
| 29908       | CadSNP5503     | <i>Desi</i>      | Ca_Desig_Chr07               | 6440597                        | (C/G)       |
| 29909       | CadSNP5504     | <i>Desi</i>      | Ca_Desig_Chr07               | 6440788                        | (A/G)       |
| 29910       | CadSNP5505     | <i>Desi</i>      | Ca_Desig_Chr07               | 6445037                        | (A/G)       |
| 29911       | CadSNP5506     | <i>Desi</i>      | Ca_Desig_Chr07               | 6445017                        | (T/G)       |
| 29912       | CadSNP5507     | <i>Desi</i>      | Ca_Desig_Chr07               | 6450307                        | (C/T)       |
| 29913       | CadSNP5508     | <i>Desi</i>      | Ca_Desig_Chr07               | 6483346                        | (G/A)       |
| 29914       | CadSNP5509     | <i>Desi</i>      | Ca_Desig_Chr07               | 6483685                        | (T/C)       |
| 29915       | CadSNP5510     | <i>Desi</i>      | Ca_Desig_Chr07               | 6483766                        | (C/A)       |
| 29916       | CadSNP5511     | <i>Desi</i>      | Ca_Desig_Chr07               | 6529361                        | (G/C)       |
| 29917       | CadSNP5512     | <i>Desi</i>      | Ca_Desig_Chr07               | 6529592                        | (G/T)       |
| 29918       | CadSNP5513     | <i>Desi</i>      | Ca_Desig_Chr07               | 6537139                        | (T/C)       |
| 29919       | CadSNP5514     | <i>Desi</i>      | Ca_Desig_Chr07               | 6537137                        | (G/A)       |
| 29920       | CadSNP5515     | <i>Desi</i>      | Ca_Desig_Chr07               | 6566463                        | (T/G)       |
| 29921       | CadSNP5516     | <i>Desi</i>      | Ca_Desig_Chr07               | 6589064                        | (A/T)       |
| 29922       | CadSNP5517     | <i>Desi</i>      | Ca_Desig_Chr07               | 6589082                        | (C/A)       |
| 29923       | CadSNP5518     | <i>Desi</i>      | Ca_Desig_Chr07               | 6605172                        | (T/C)       |
| 29924       | CadSNP5519     | <i>Desi</i>      | Ca_Desig_Chr07               | 6622242                        | (C/T)       |
| 29925       | CadSNP5520     | <i>Desi</i>      | Ca_Desig_Chr07               | 6627866                        | (C/T)       |
| 29926       | CadSNP5521     | <i>Desi</i>      | Ca_Desig_Chr07               | 6672779                        | (T/C)       |
| 29927       | CadSNP5522     | <i>Desi</i>      | Ca_Desig_Chr07               | 6753515                        | (T/C)       |
| 29928       | CadSNP5523     | <i>Desi</i>      | Ca_Desig_Chr07               | 6803779                        | (G/A)       |
| 29929       | CadSNP5524     | <i>Desi</i>      | Ca_Desig_Chr07               | 6803780                        | (C/A)       |
| 29930       | CadSNP5525     | <i>Desi</i>      | Ca_Desig_Chr07               | 6841045                        | (G/A)       |
| 29931       | CadSNP5526     | <i>Desi</i>      | Ca_Desig_Chr07               | 6841069                        | (A/T)       |
| 29932       | CadSNP5527     | <i>Desi</i>      | Ca_Desig_Chr07               | 6861317                        | (C/G)       |
| 29933       | CadSNP5528     | <i>Desi</i>      | Ca_Desig_Chr07               | 6861431                        | (A/C)       |
| 29934       | CadSNP5529     | <i>Desi</i>      | Ca_Desig_Chr07               | 6950249                        | (G/A)       |
| 29935       | CadSNP5530     | <i>Desi</i>      | Ca_Desig_Chr07               | 6950294                        | (C/T)       |
| 29936       | CadSNP5531     | <i>Desi</i>      | Ca_Desig_Chr07               | 6950285                        | (A/C)       |
| 29937       | CadSNP5532     | <i>Desi</i>      | Ca_Desig_Chr07               | 7017825                        | (G/A)       |
| 29938       | CadSNP5533     | <i>Desi</i>      | Ca_Desig_Chr07               | 7072321                        | (T/C)       |
| 29939       | CadSNP5534     | <i>Desi</i>      | Ca_Desig_Chr07               | 7089782                        | (T/C)       |
| 29940       | CadSNP5535     | <i>Desi</i>      | Ca_Desig_Chr07               | 7182637                        | (C/G)       |
| 29941       | CadSNP5536     | <i>Desi</i>      | Ca_Desig_Chr07               | 7182635                        | (A/C)       |
| 29942       | CadSNP5537     | <i>Desi</i>      | Ca_Desig_Chr07               | 7182630                        | (C/T)       |
| 29943       | CadSNP5538     | <i>Desi</i>      | Ca_Desig_Chr07               | 7182626                        | (C/T)       |

| <b>S.N.</b> | <b>SNP IDs</b> | <b>Cultivars</b> | <b>Chromosomes/scaffolds</b> | <b>Physical positions (bp)</b> | <b>SNPs</b> |
|-------------|----------------|------------------|------------------------------|--------------------------------|-------------|
| 29944       | CadSNP5539     | <i>Desi</i>      | Ca_Desig_Chr07               | 7182623                        | (A/G)       |
| 29945       | CadSNP5540     | <i>Desi</i>      | Ca_Desig_Chr07               | 7182620                        | (C/T)       |
| 29946       | CadSNP5541     | <i>Desi</i>      | Ca_Desig_Chr07               | 7182593                        | (A/G)       |
| 29947       | CadSNP5542     | <i>Desi</i>      | Ca_Desig_Chr07               | 7182652                        | (C/A)       |
| 29948       | CadSNP5543     | <i>Desi</i>      | Ca_Desig_Chr07               | 7214101                        | (G/A)       |
| 29949       | CadSNP5544     | <i>Desi</i>      | Ca_Desig_Chr07               | 7229452                        | (A/C)       |
| 29950       | CadSNP5545     | <i>Desi</i>      | Ca_Desig_Chr07               | 7229513                        | (A/G)       |
| 29951       | CadSNP5546     | <i>Desi</i>      | Ca_Desig_Chr07               | 7233251                        | (G/A)       |
| 29952       | CadSNP5547     | <i>Desi</i>      | Ca_Desig_Chr07               | 7233276                        | (C/A)       |
| 29953       | CadSNP5548     | <i>Desi</i>      | Ca_Desig_Chr07               | 7233247                        | (C/T)       |
| 29954       | CadSNP5549     | <i>Desi</i>      | Ca_Desig_Chr07               | 7234465                        | (C/T)       |
| 29955       | CadSNP5550     | <i>Desi</i>      | Ca_Desig_Chr07               | 7266190                        | (G/T)       |
| 29956       | CadSNP5551     | <i>Desi</i>      | Ca_Desig_Chr07               | 7266216                        | (C/A)       |
| 29957       | CadSNP5552     | <i>Desi</i>      | Ca_Desig_Chr07               | 7351143                        | (T/C)       |
| 29958       | CadSNP5553     | <i>Desi</i>      | Ca_Desig_Chr07               | 7351130                        | (A/G)       |
| 29959       | CadSNP5554     | <i>Desi</i>      | Ca_Desig_Chr07               | 7427278                        | (A/G)       |
| 29960       | CadSNP5555     | <i>Desi</i>      | Ca_Desig_Chr07               | 7497869                        | (G/A)       |
| 29961       | CadSNP5556     | <i>Desi</i>      | Ca_Desig_Chr07               | 7497859                        | (A/G)       |
| 29962       | CadSNP5557     | <i>Desi</i>      | Ca_Desig_Chr07               | 7497855                        | (G/C)       |
| 29963       | CadSNP5558     | <i>Desi</i>      | Ca_Desig_Chr07               | 7557040                        | (A/G)       |
| 29964       | CadSNP5559     | <i>Desi</i>      | Ca_Desig_Chr07               | 7557038                        | (A/G)       |
| 29965       | CadSNP5560     | <i>Desi</i>      | Ca_Desig_Chr07               | 7556970                        | (C/G)       |
| 29966       | CadSNP5561     | <i>Desi</i>      | Ca_Desig_Chr07               | 7687656                        | (C/T)       |
| 29967       | CadSNP5562     | <i>Desi</i>      | Ca_Desig_Chr07               | 7687649                        | (C/T)       |
| 29968       | CadSNP5563     | <i>Desi</i>      | Ca_Desig_Chr07               | 7688659                        | (T/A)       |
| 29969       | CadSNP5564     | <i>Desi</i>      | Ca_Desig_Chr07               | 7750219                        | (A/G)       |
| 29970       | CadSNP5565     | <i>Desi</i>      | Ca_Desig_Chr07               | 7750971                        | (T/G)       |
| 29971       | CadSNP5566     | <i>Desi</i>      | Ca_Desig_Chr07               | 7796833                        | (T/A)       |
| 29972       | CadSNP5567     | <i>Desi</i>      | Ca_Desig_Chr07               | 7796875                        | (C/T)       |
| 29973       | CadSNP5568     | <i>Desi</i>      | Ca_Desig_Chr07               | 7796940                        | (A/G)       |
| 29974       | CadSNP5569     | <i>Desi</i>      | Ca_Desig_Chr07               | 7796939                        | (C/A)       |
| 29975       | CadSNP5570     | <i>Desi</i>      | Ca_Desig_Chr07               | 7869802                        | (G/T)       |
| 29976       | CadSNP5571     | <i>Desi</i>      | Ca_Desig_Chr07               | 7895128                        | (G/C)       |
| 29977       | CadSNP5572     | <i>Desi</i>      | Ca_Desig_Chr07               | 7895094                        | (C/A)       |
| 29978       | CadSNP5573     | <i>Desi</i>      | Ca_Desig_Chr07               | 7895789                        | (A/C)       |
| 29979       | CadSNP5574     | <i>Desi</i>      | Ca_Desig_Chr07               | 7945573                        | (G/A)       |
| 29980       | CadSNP5575     | <i>Desi</i>      | Ca_Desig_Chr07               | 8015487                        | (C/G)       |
| 29981       | CadSNP5576     | <i>Desi</i>      | Ca_Desig_Chr07               | 8021380                        | (T/C)       |

| <b>S.N.</b> | <b>SNP IDs</b> | <b>Cultivars</b> | <b>Chromosomes/scaffolds</b> | <b>Physical positions (bp)</b> | <b>SNPs</b> |
|-------------|----------------|------------------|------------------------------|--------------------------------|-------------|
| 29982       | CadSNP5577     | <i>Desi</i>      | Ca_Desig_Chr07               | 8021391                        | (T/A)       |
| 29983       | CadSNP5578     | <i>Desi</i>      | Ca_Desig_Chr07               | 8097449                        | (C/A)       |
| 29984       | CadSNP5579     | <i>Desi</i>      | Ca_Desig_Chr07               | 8097508                        | (A/G)       |
| 29985       | CadSNP5580     | <i>Desi</i>      | Ca_Desig_Chr07               | 8113326                        | (C/A)       |
| 29986       | CadSNP5581     | <i>Desi</i>      | Ca_Desig_Chr07               | 8180365                        | (G/A)       |
| 29987       | CadSNP5582     | <i>Desi</i>      | Ca_Desig_Chr07               | 8187265                        | (C/T)       |
| 29988       | CadSNP5583     | <i>Desi</i>      | Ca_Desig_Chr07               | 8209334                        | (G/T)       |
| 29989       | CadSNP5584     | <i>Desi</i>      | Ca_Desig_Chr07               | 8387061                        | (G/T)       |
| 29990       | CadSNP5585     | <i>Desi</i>      | Ca_Desig_Chr07               | 8387457                        | (T/C)       |
| 29991       | CadSNP5586     | <i>Desi</i>      | Ca_Desig_Chr07               | 8454842                        | (C/A)       |
| 29992       | CadSNP5587     | <i>Desi</i>      | Ca_Desig_Chr08               | 69384                          | (G/A)       |
| 29993       | CadSNP5588     | <i>Desi</i>      | Ca_Desig_Chr08               | 147015                         | (G/A)       |
| 29994       | CadSNP5589     | <i>Desi</i>      | Ca_Desig_Chr08               | 201422                         | (T/C)       |
| 29995       | CadSNP5590     | <i>Desi</i>      | Ca_Desig_Chr08               | 201411                         | (C/A)       |
| 29996       | CadSNP5591     | <i>Desi</i>      | Ca_Desig_Chr08               | 201850                         | (G/C)       |
| 29997       | CadSNP5592     | <i>Desi</i>      | Ca_Desig_Chr08               | 202036                         | (T/G)       |
| 29998       | CadSNP5593     | <i>Desi</i>      | Ca_Desig_Chr08               | 202026                         | (C/G)       |
| 29999       | CadSNP5594     | <i>Desi</i>      | Ca_Desig_Chr08               | 201989                         | (G/A)       |
| 30000       | CadSNP5595     | <i>Desi</i>      | Ca_Desig_Chr08               | 225584                         | (G/A)       |
| 30001       | CadSNP5596     | <i>Desi</i>      | Ca_Desig_Chr08               | 225750                         | (A/G)       |
| 30002       | CadSNP5597     | <i>Desi</i>      | Ca_Desig_Chr08               | 229536                         | (G/A)       |
| 30003       | CadSNP5598     | <i>Desi</i>      | Ca_Desig_Chr08               | 230236                         | (C/G)       |
| 30004       | CadSNP5599     | <i>Desi</i>      | Ca_Desig_Chr08               | 252774                         | (A/C)       |
| 30005       | CadSNP5600     | <i>Desi</i>      | Ca_Desig_Chr08               | 276987                         | (T/G)       |
| 30006       | CadSNP5601     | <i>Desi</i>      | Ca_Desig_Chr08               | 276998                         | (C/G)       |
| 30007       | CadSNP5602     | <i>Desi</i>      | Ca_Desig_Chr08               | 277000                         | (A/T)       |
| 30008       | CadSNP5603     | <i>Desi</i>      | Ca_Desig_Chr08               | 277065                         | (C/T)       |
| 30009       | CadSNP5604     | <i>Desi</i>      | Ca_Desig_Chr08               | 277031                         | (G/T)       |
| 30010       | CadSNP5605     | <i>Desi</i>      | Ca_Desig_Chr08               | 289051                         | (T/G)       |
| 30011       | CadSNP5606     | <i>Desi</i>      | Ca_Desig_Chr08               | 289046                         | (G/C)       |
| 30012       | CadSNP5607     | <i>Desi</i>      | Ca_Desig_Chr08               | 289045                         | (T/G)       |
| 30013       | CadSNP5608     | <i>Desi</i>      | Ca_Desig_Chr08               | 289170                         | (C/A)       |
| 30014       | CadSNP5609     | <i>Desi</i>      | Ca_Desig_Chr08               | 289210                         | (A/G)       |
| 30015       | CadSNP5610     | <i>Desi</i>      | Ca_Desig_Chr08               | 332292                         | (T/C)       |
| 30016       | CadSNP5611     | <i>Desi</i>      | Ca_Desig_Chr08               | 332316                         | (C/A)       |
| 30017       | CadSNP5612     | <i>Desi</i>      | Ca_Desig_Chr08               | 344231                         | (A/C)       |
| 30018       | CadSNP5613     | <i>Desi</i>      | Ca_Desig_Chr08               | 344210                         | (A/G)       |
| 30019       | CadSNP5614     | <i>Desi</i>      | Ca_Desig_Chr08               | 344221                         | (C/T)       |



| <b>S.N.</b> | <b>SNP IDs</b> | <b>Cultivars</b> | <b>Chromosomes/scaffolds</b> | <b>Physical positions (bp)</b> | <b>SNPs</b> |
|-------------|----------------|------------------|------------------------------|--------------------------------|-------------|
| 30020       | CadSNP5615     | <i>Desi</i>      | Ca_Desig_Chr08               | 344233                         | (A/C)       |
| 30021       | CadSNP5616     | <i>Desi</i>      | Ca_Desig_Chr08               | 344237                         | (G/A)       |
| 30022       | CadSNP5617     | <i>Desi</i>      | Ca_Desig_Chr08               | 344964                         | (C/G)       |
| 30023       | CadSNP5618     | <i>Desi</i>      | Ca_Desig_Chr08               | 355826                         | (T/C)       |
| 30024       | CadSNP5619     | <i>Desi</i>      | Ca_Desig_Chr08               | 355898                         | (T/A)       |
| 30025       | CadSNP5620     | <i>Desi</i>      | Ca_Desig_Chr08               | 355890                         | (T/A)       |
| 30026       | CadSNP5621     | <i>Desi</i>      | Ca_Desig_Chr08               | 355889                         | (G/A)       |
| 30027       | CadSNP5622     | <i>Desi</i>      | Ca_Desig_Chr08               | 355884                         | (T/A)       |
| 30028       | CadSNP5623     | <i>Desi</i>      | Ca_Desig_Chr08               | 355882                         | (C/A)       |
| 30029       | CadSNP5624     | <i>Desi</i>      | Ca_Desig_Chr08               | 355989                         | (A/C)       |
| 30030       | CadSNP5625     | <i>Desi</i>      | Ca_Desig_Chr08               | 371615                         | (T/G)       |
| 30031       | CadSNP5626     | <i>Desi</i>      | Ca_Desig_Chr08               | 371628                         | (A/T)       |
| 30032       | CadSNP5627     | <i>Desi</i>      | Ca_Desig_Chr08               | 371661                         | (A/T)       |
| 30033       | CadSNP5628     | <i>Desi</i>      | Ca_Desig_Chr08               | 372231                         | (A/T)       |
| 30034       | CadSNP5629     | <i>Desi</i>      | Ca_Desig_Chr08               | 372419                         | (A/G)       |
| 30035       | CadSNP5630     | <i>Desi</i>      | Ca_Desig_Chr08               | 397389                         | (C/T)       |
| 30036       | CadSNP5631     | <i>Desi</i>      | Ca_Desig_Chr08               | 422127                         | (T/A)       |
| 30037       | CadSNP5632     | <i>Desi</i>      | Ca_Desig_Chr08               | 427213                         | (G/T)       |
| 30038       | CadSNP5633     | <i>Desi</i>      | Ca_Desig_Chr08               | 427216                         | (G/T)       |
| 30039       | CadSNP5634     | <i>Desi</i>      | Ca_Desig_Chr08               | 427219                         | (A/G)       |
| 30040       | CadSNP5635     | <i>Desi</i>      | Ca_Desig_Chr08               | 509850                         | (A/T)       |
| 30041       | CadSNP5636     | <i>Desi</i>      | Ca_Desig_Chr08               | 517193                         | (G/A)       |
| 30042       | CadSNP5637     | <i>Desi</i>      | Ca_Desig_Chr08               | 574778                         | (T/G)       |
| 30043       | CadSNP5638     | <i>Desi</i>      | Ca_Desig_Chr08               | 574868                         | (C/T)       |
| 30044       | CadSNP5639     | <i>Desi</i>      | Ca_Desig_Chr08               | 574898                         | (G/A)       |
| 30045       | CadSNP5640     | <i>Desi</i>      | Ca_Desig_Chr08               | 574899                         | (A/G)       |
| 30046       | CadSNP5641     | <i>Desi</i>      | Ca_Desig_Chr08               | 598190                         | (G/A)       |
| 30047       | CadSNP5642     | <i>Desi</i>      | Ca_Desig_Chr08               | 598329                         | (C/T)       |
| 30048       | CadSNP5643     | <i>Desi</i>      | Ca_Desig_Chr08               | 598338                         | (A/G)       |
| 30049       | CadSNP5644     | <i>Desi</i>      | Ca_Desig_Chr08               | 598341                         | (A/T)       |
| 30050       | CadSNP5645     | <i>Desi</i>      | Ca_Desig_Chr08               | 598344                         | (C/T)       |
| 30051       | CadSNP5646     | <i>Desi</i>      | Ca_Desig_Chr08               | 598350                         | (C/T)       |
| 30052       | CadSNP5647     | <i>Desi</i>      | Ca_Desig_Chr08               | 598356                         | (A/T)       |
| 30053       | CadSNP5648     | <i>Desi</i>      | Ca_Desig_Chr08               | 598365                         | (A/G)       |
| 30054       | CadSNP5649     | <i>Desi</i>      | Ca_Desig_Chr08               | 598371                         | (C/T)       |
| 30055       | CadSNP5650     | <i>Desi</i>      | Ca_Desig_Chr08               | 598377                         | (A/G)       |
| 30056       | CadSNP5651     | <i>Desi</i>      | Ca_Desig_Chr08               | 598378                         | (A/T)       |
| 30057       | CadSNP5652     | <i>Desi</i>      | Ca_Desig_Chr08               | 598380                         | (C/T)       |

| <b>S.N.</b> | <b>SNP IDs</b> | <b>Cultivars</b> | <b>Chromosomes/scaffolds</b> | <b>Physical positions (bp)</b> | <b>SNPs</b> |
|-------------|----------------|------------------|------------------------------|--------------------------------|-------------|
| 30058       | CadSNP5653     | <i>Desi</i>      | Ca_Desig_Chr08               | 598383                         | (C/T)       |
| 30059       | CadSNP5654     | <i>Desi</i>      | Ca_Desig_Chr08               | 598386                         | (C/T)       |
| 30060       | CadSNP5655     | <i>Desi</i>      | Ca_Desig_Chr08               | 598388                         | (C/G)       |
| 30061       | CadSNP5656     | <i>Desi</i>      | Ca_Desig_Chr08               | 598389                         | (A/C)       |
| 30062       | CadSNP5657     | <i>Desi</i>      | Ca_Desig_Chr08               | 598419                         | (G/A)       |
| 30063       | CadSNP5658     | <i>Desi</i>      | Ca_Desig_Chr08               | 598416                         | (T/C)       |
| 30064       | CadSNP5659     | <i>Desi</i>      | Ca_Desig_Chr08               | 598413                         | (T/C)       |
| 30065       | CadSNP5660     | <i>Desi</i>      | Ca_Desig_Chr08               | 611284                         | (T/C)       |
| 30066       | CadSNP5661     | <i>Desi</i>      | Ca_Desig_Chr08               | 752338                         | (A/G)       |
| 30067       | CadSNP5662     | <i>Desi</i>      | Ca_Desig_Chr08               | 758789                         | (C/A)       |
| 30068       | CadSNP5663     | <i>Desi</i>      | Ca_Desig_Chr08               | 758788                         | (C/T)       |
| 30069       | CadSNP5664     | <i>Desi</i>      | Ca_Desig_Chr08               | 760783                         | (T/A)       |
| 30070       | CadSNP5665     | <i>Desi</i>      | Ca_Desig_Chr08               | 863217                         | (G/A)       |
| 30071       | CadSNP5666     | <i>Desi</i>      | Ca_Desig_Chr08               | 866726                         | (G/A)       |
| 30072       | CadSNP5667     | <i>Desi</i>      | Ca_Desig_Chr08               | 868822                         | (C/T)       |
| 30073       | CadSNP5668     | <i>Desi</i>      | Ca_Desig_Chr08               | 914590                         | (G/T)       |
| 30074       | CadSNP5669     | <i>Desi</i>      | Ca_Desig_Chr08               | 984830                         | (A/C)       |
| 30075       | CadSNP5670     | <i>Desi</i>      | Ca_Desig_Chr08               | 984931                         | (T/A)       |
| 30076       | CadSNP5671     | <i>Desi</i>      | Ca_Desig_Chr08               | 984921                         | (C/A)       |
| 30077       | CadSNP5672     | <i>Desi</i>      | Ca_Desig_Chr08               | 985172                         | (G/A)       |
| 30078       | CadSNP5673     | <i>Desi</i>      | Ca_Desig_Chr08               | 1041386                        | (G/C)       |
| 30079       | CadSNP5674     | <i>Desi</i>      | Ca_Desig_Chr08               | 1346520                        | (A/G)       |
| 30080       | CadSNP5675     | <i>Desi</i>      | Ca_Desig_Chr08               | 1352205                        | (G/A)       |
| 30081       | CadSNP5676     | <i>Desi</i>      | Ca_Desig_Chr08               | 1365871                        | (G/T)       |
| 30082       | CadSNP5677     | <i>Desi</i>      | Ca_Desig_Chr08               | 1365903                        | (A/G)       |
| 30083       | CadSNP5678     | <i>Desi</i>      | Ca_Desig_Chr08               | 1391479                        | (A/T)       |
| 30084       | CadSNP5679     | <i>Desi</i>      | Ca_Desig_Chr08               | 1391494                        | (T/C)       |
| 30085       | CadSNP5680     | <i>Desi</i>      | Ca_Desig_Chr08               | 1391517                        | (T/A)       |
| 30086       | CadSNP5681     | <i>Desi</i>      | Ca_Desig_Chr08               | 1399554                        | (A/T)       |
| 30087       | CadSNP5682     | <i>Desi</i>      | Ca_Desig_Chr08               | 1399603                        | (C/A)       |
| 30088       | CadSNP5683     | <i>Desi</i>      | Ca_Desig_Chr08               | 1428402                        | (T/C)       |
| 30089       | CadSNP5684     | <i>Desi</i>      | Ca_Desig_Chr08               | 1430662                        | (G/A)       |
| 30090       | CadSNP5685     | <i>Desi</i>      | Ca_Desig_Chr08               | 1431902                        | (A/G)       |
| 30091       | CadSNP5686     | <i>Desi</i>      | Ca_Desig_Chr08               | 1450166                        | (C/T)       |
| 30092       | CadSNP5687     | <i>Desi</i>      | Ca_Desig_Chr08               | 1450329                        | (C/T)       |
| 30093       | CadSNP5688     | <i>Desi</i>      | Ca_Desig_Chr08               | 1458106                        | (A/G)       |
| 30094       | CadSNP5689     | <i>Desi</i>      | Ca_Desig_Chr08               | 1474737                        | (G/A)       |
| 30095       | CadSNP5690     | <i>Desi</i>      | Ca_Desig_Chr08               | 1474824                        | (A/G)       |

| <b>S.N.</b> | <b>SNP IDs</b> | <b>Cultivars</b> | <b>Chromosomes/scaffolds</b> | <b>Physical positions (bp)</b> | <b>SNPs</b> |
|-------------|----------------|------------------|------------------------------|--------------------------------|-------------|
| 30096       | CadSNP5691     | <i>Desi</i>      | Ca_Desig_Chr08               | 1475095                        | (A/C)       |
| 30097       | CadSNP5692     | <i>Desi</i>      | Ca_Desig_Chr08               | 1557073                        | (T/A)       |
| 30098       | CadSNP5693     | <i>Desi</i>      | Ca_Desig_Chr08               | 1575135                        | (G/T)       |
| 30099       | CadSNP5694     | <i>Desi</i>      | Ca_Desig_Chr08               | 1577080                        | (G/A)       |
| 30100       | CadSNP5695     | <i>Desi</i>      | Ca_Desig_Chr08               | 1577795                        | (C/T)       |
| 30101       | CadSNP5696     | <i>Desi</i>      | Ca_Desig_Chr08               | 1577778                        | (T/C)       |
| 30102       | CadSNP5697     | <i>Desi</i>      | Ca_Desig_Chr08               | 3412279                        | (A/G)       |
| 30103       | CadSNP5698     | <i>Desi</i>      | Ca_Desig_Chr08               | 3444004                        | (G/A)       |
| 30104       | CadSNP5699     | <i>Desi</i>      | Ca_Desig_Chr08               | 3444121                        | (G/T)       |
| 30105       | CadSNP5700     | <i>Desi</i>      | Ca_Desig_Chr08               | 3461595                        | (A/G)       |
| 30106       | CadSNP5701     | <i>Desi</i>      | Ca_Desig_Chr08               | 3495408                        | (G/T)       |
| 30107       | CadSNP5702     | <i>Desi</i>      | Ca_Desig_Chr08               | 3497466                        | (C/T)       |
| 30108       | CadSNP5703     | <i>Desi</i>      | Ca_Desig_Chr08               | 3499998                        | (A/G)       |
| 30109       | CadSNP5704     | <i>Desi</i>      | Ca_Desig_Chr08               | 3500134                        | (A/G)       |
| 30110       | CadSNP5705     | <i>Desi</i>      | Ca_Desig_Chr08               | 3500770                        | (G/A)       |
| 30111       | CadSNP5706     | <i>Desi</i>      | Ca_Desig_Chr08               | 3501823                        | (G/A)       |
| 30112       | CadSNP5707     | <i>Desi</i>      | Ca_Desig_Chr08               | 3568943                        | (A/T)       |
| 30113       | CadSNP5708     | <i>Desi</i>      | Ca_Desig_Chr08               | 3568930                        | (G/A)       |
| 30114       | CadSNP5709     | <i>Desi</i>      | Ca_Desig_Chr08               | 3583414                        | (T/C)       |
| 30115       | CadSNP5710     | <i>Desi</i>      | Ca_Desig_Chr08               | 3614642                        | (T/C)       |
| 30116       | CadSNP5711     | <i>Desi</i>      | Ca_Desig_Chr08               | 3643104                        | (G/A)       |
| 30117       | CadSNP5712     | <i>Desi</i>      | Ca_Desig_Chr08               | 3643216                        | (A/C)       |
| 30118       | CadSNP5713     | <i>Desi</i>      | Ca_Desig_Chr08               | 3656251                        | (G/A)       |
| 30119       | CadSNP5714     | <i>Desi</i>      | Ca_Desig_Chr08               | 3657713                        | (A/G)       |
| 30120       | CadSNP5715     | <i>Desi</i>      | Ca_Desig_Chr08               | 3657904                        | (A/C)       |
| 30121       | CadSNP5716     | <i>Desi</i>      | Ca_Desig_Chr08               | 3659352                        | (A/G)       |
| 30122       | CadSNP5717     | <i>Desi</i>      | Ca_Desig_Chr08               | 3659459                        | (G/A)       |
| 30123       | CadSNP5718     | <i>Desi</i>      | Ca_Desig_Chr08               | 3659394                        | (C/A)       |
| 30124       | CadSNP5719     | <i>Desi</i>      | Ca_Desig_Chr08               | 3672982                        | (C/T)       |
| 30125       | CadSNP5720     | <i>Desi</i>      | Ca_Desig_Chr08               | 3673021                        | (T/C)       |
| 30126       | CadSNP5721     | <i>Desi</i>      | Ca_Desig_Chr08               | 3680541                        | (A/G)       |
| 30127       | CadSNP5722     | <i>Desi</i>      | Ca_Desig_Chr08               | 3680544                        | (T/C)       |
| 30128       | CadSNP5723     | <i>Desi</i>      | Ca_Desig_Chr08               | 3695139                        | (C/T)       |
| 30129       | CadSNP5724     | <i>Desi</i>      | Ca_Desig_Chr08               | 3697176                        | (G/A)       |
| 30130       | CadSNP5725     | <i>Desi</i>      | Ca_Desig_Chr08               | 3697244                        | (C/T)       |
| 30131       | CadSNP5726     | <i>Desi</i>      | Ca_Desig_Chr08               | 3709956                        | (T/C)       |
| 30132       | CadSNP5727     | <i>Desi</i>      | Ca_Desig_Chr08               | 3718115                        | (G/A)       |
| 30133       | CadSNP5728     | <i>Desi</i>      | Ca_Desig_Chr08               | 3741971                        | (C/T)       |

| <b>S.N.</b> | <b>SNP IDs</b> | <b>Cultivars</b> | <b>Chromosomes/scaffolds</b> | <b>Physical positions (bp)</b> | <b>SNPs</b> |
|-------------|----------------|------------------|------------------------------|--------------------------------|-------------|
| 30134       | CadSNP5729     | <i>Desi</i>      | Ca_Desig_Chr08               | 3741978                        | (T/G)       |
| 30135       | CadSNP5730     | <i>Desi</i>      | Ca_Desig_Chr08               | 3742011                        | (T/C)       |
| 30136       | CadSNP5731     | <i>Desi</i>      | Ca_Desig_Chr08               | 3742012                        | (C/T)       |
| 30137       | CadSNP5732     | <i>Desi</i>      | Ca_Desig_Chr08               | 3742132                        | (A/C)       |
| 30138       | CadSNP5733     | <i>Desi</i>      | Ca_Desig_Chr08               | 3769184                        | (G/A)       |
| 30139       | CadSNP5734     | <i>Desi</i>      | Ca_Desig_Chr08               | 3789039                        | (T/C)       |
| 30140       | CadSNP5735     | <i>Desi</i>      | Ca_Desig_Chr08               | 3793465                        | (G/T)       |
| 30141       | CadSNP5736     | <i>Desi</i>      | Ca_Desig_Chr08               | 3804401                        | (G/C)       |
| 30142       | CadSNP5737     | <i>Desi</i>      | Ca_Desig_Chr08               | 3810941                        | (T/C)       |
| 30143       | CadSNP5738     | <i>Desi</i>      | Ca_Desig_Chr08               | 3810985                        | (G/A)       |
| 30144       | CadSNP5739     | <i>Desi</i>      | Ca_Desig_Chr08               | 3877026                        | (T/A)       |
| 30145       | CadSNP5740     | <i>Desi</i>      | Ca_Desig_Chr08               | 3881760                        | (T/C)       |
| 30146       | CadSNP5741     | <i>Desi</i>      | Ca_Desig_Chr08               | 3897883                        | (G/A)       |
| 30147       | CadSNP5742     | <i>Desi</i>      | Ca_Desig_Chr08               | 3897848                        | (G/C)       |
| 30148       | CadSNP5743     | <i>Desi</i>      | Ca_Desig_Chr08               | 3939089                        | (T/C)       |
| 30149       | CadSNP5744     | <i>Desi</i>      | Ca_Desig_Chr08               | 3939062                        | (G/A)       |
| 30150       | CadSNP5745     | <i>Desi</i>      | Ca_Desig_Chr08               | 3939040                        | (C/A)       |
| 30151       | CadSNP5746     | <i>Desi</i>      | Ca_Desig_Chr08               | 3940090                        | (A/G)       |
| 30152       | CadSNP5747     | <i>Desi</i>      | Ca_Desig_Chr08               | 3940158                        | (A/G)       |
| 30153       | CadSNP5748     | <i>Desi</i>      | Ca_Desig_Chr08               | 3945088                        | (T/A)       |
| 30154       | CadSNP5749     | <i>Desi</i>      | Ca_Desig_Chr08               | 3957633                        | (A/G)       |
| 30155       | CadSNP5750     | <i>Desi</i>      | Ca_Desig_Chr08               | 3960575                        | (T/G)       |
| 30156       | CadSNP5751     | <i>Desi</i>      | Ca_Desig_Chr08               | 3960582                        | (G/T)       |
| 30157       | CadSNP5752     | <i>Desi</i>      | Ca_Desig_Chr08               | 3960598                        | (T/C)       |
| 30158       | CadSNP5753     | <i>Desi</i>      | Ca_Desig_Chr08               | 3972778                        | (C/T)       |
| 30159       | CadSNP5754     | <i>Desi</i>      | Ca_Desig_Chr08               | 3986516                        | (A/T)       |
| 30160       | CadSNP5755     | <i>Desi</i>      | Ca_Desig_Chr08               | 3989301                        | (A/C)       |
| 30161       | CadSNP5756     | <i>Desi</i>      | Ca_Desig_Chr08               | 3989306                        | (G/A)       |
| 30162       | CadSNP5757     | <i>Desi</i>      | Ca_Desig_Chr08               | 3989344                        | (G/A)       |
| 30163       | CadSNP5758     | <i>Desi</i>      | Ca_Desig_Chr08               | 3999654                        | (C/T)       |
| 30164       | CadSNP5759     | <i>Desi</i>      | Ca_Desig_Chr08               | 4002796                        | (G/A)       |
| 30165       | CadSNP5760     | <i>Desi</i>      | Ca_Desig_Chr08               | 4060900                        | (A/C)       |
| 30166       | CadSNP5761     | <i>Desi</i>      | Ca_Desig_Chr08               | 4068970                        | (T/C)       |
| 30167       | CadSNP5762     | <i>Desi</i>      | Ca_Desig_Chr08               | 4090866                        | (G/A)       |
| 30168       | CadSNP5763     | <i>Desi</i>      | Ca_Desig_Chr08               | 4126353                        | (C/T)       |
| 30169       | CadSNP5764     | <i>Desi</i>      | Ca_Desig_Chr08               | 4126424                        | (T/C)       |
| 30170       | CadSNP5765     | <i>Desi</i>      | Ca_Desig_Chr08               | 4146665                        | (C/A)       |
| 30171       | CadSNP5766     | <i>Desi</i>      | Ca_Desig_Chr08               | 4146618                        | (T/C)       |

| <b>S.N.</b> | <b>SNP IDs</b> | <b>Cultivars</b> | <b>Chromosomes/scaffolds</b> | <b>Physical positions (bp)</b> | <b>SNPs</b> |
|-------------|----------------|------------------|------------------------------|--------------------------------|-------------|
| 30172       | CadSNP5767     | <i>Desi</i>      | Ca_Desig_Chr08               | 4146608                        | (A/G)       |
| 30173       | CadSNP5768     | <i>Desi</i>      | Ca_Desig_Chr08               | 4149441                        | (T/G)       |
| 30174       | CadSNP5769     | <i>Desi</i>      | Ca_Desig_Chr08               | 4197700                        | (A/G)       |
| 30175       | CadSNP5770     | <i>Desi</i>      | Ca_Desig_Chr08               | 4208175                        | (T/G)       |
| 30176       | CadSNP5771     | <i>Desi</i>      | Ca_Desig_Chr08               | 4208169                        | (T/G)       |
| 30177       | CadSNP5772     | <i>Desi</i>      | Ca_Desig_Chr08               | 4208163                        | (T/A)       |
| 30178       | CadSNP5773     | <i>Desi</i>      | Ca_Desig_Chr08               | 4208157                        | (A/G)       |
| 30179       | CadSNP5774     | <i>Desi</i>      | Ca_Desig_Chr08               | 4208155                        | (G/A)       |
| 30180       | CadSNP5775     | <i>Desi</i>      | Ca_Desig_Chr08               | 4271502                        | (G/T)       |
| 30181       | CadSNP5776     | <i>Desi</i>      | Ca_Desig_Chr08               | 4300014                        | (A/C)       |
| 30182       | CadSNP5777     | <i>Desi</i>      | Ca_Desig_Chr08               | 4310627                        | (C/T)       |
| 30183       | CadSNP5778     | <i>Desi</i>      | Ca_Desig_Chr08               | 4310667                        | (A/C)       |
| 30184       | CadSNP5779     | <i>Desi</i>      | Ca_Desig_Chr08               | 4357190                        | (G/A)       |
| 30185       | CadSNP5780     | <i>Desi</i>      | Ca_Desig_Chr08               | 4357364                        | (C/G)       |
| 30186       | CadSNP5781     | <i>Desi</i>      | Ca_Desig_Chr08               | 4358387                        | (A/T)       |
| 30187       | CadSNP5782     | <i>Desi</i>      | Ca_Desig_Chr08               | 4358388                        | (T/A)       |
| 30188       | CadSNP5783     | <i>Desi</i>      | Ca_Desig_Chr08               | 4358499                        | (C/T)       |
| 30189       | CadSNP5784     | <i>Desi</i>      | Ca_Desig_Chr08               | 4358491                        | (G/T)       |
| 30190       | CadSNP5785     | <i>Desi</i>      | Ca_Desig_Chr08               | 4358460                        | (G/A)       |
| 30191       | CadSNP5786     | <i>Desi</i>      | Ca_Desig_Chr08               | 4391061                        | (G/A)       |
| 30192       | CadSNP5787     | <i>Desi</i>      | Ca_Desig_Chr08               | 4409441                        | (T/G)       |
| 30193       | CadSNP5788     | <i>Desi</i>      | Ca_Desig_Chr08               | 4535097                        | (A/G)       |
| 30194       | CadSNP5789     | <i>Desi</i>      | Ca_Desig_Chr08               | 4535212                        | (T/C)       |
| 30195       | CadSNP5790     | <i>Desi</i>      | Ca_Desig_Chr08               | 4542888                        | (A/G)       |
| 30196       | CadSNP5791     | <i>Desi</i>      | Ca_Desig_Chr08               | 4559055                        | (T/C)       |
| 30197       | CadSNP5792     | <i>Desi</i>      | Ca_Desig_Chr08               | 4566000                        | (A/C)       |
| 30198       | CadSNP5793     | <i>Desi</i>      | Ca_Desig_Chr08               | 4574072                        | (C/G)       |
| 30199       | CadSNP5794     | <i>Desi</i>      | Ca_Desig_Chr08               | 4593500                        | (G/A)       |
| 30200       | CadSNP5795     | <i>Desi</i>      | Ca_Desig_Chr08               | 4593950                        | (G/T)       |
| 30201       | CadSNP5796     | <i>Desi</i>      | Ca_Desig_Chr08               | 4593952                        | (A/G)       |
| 30202       | CadSNP5797     | <i>Desi</i>      | Ca_Desig_Chr08               | 4600461                        | (C/T)       |
| 30203       | CadSNP5798     | <i>Desi</i>      | Ca_Desig_Chr08               | 4623057                        | (T/C)       |
| 30204       | CadSNP5799     | <i>Desi</i>      | Ca_Desig_Chr08               | 4623068                        | (A/C)       |
| 30205       | CadSNP5800     | <i>Desi</i>      | Ca_Desig_Chr08               | 4628096                        | (A/G)       |
| 30206       | CadSNP5801     | <i>Desi</i>      | Ca_Desig_Chr08               | 4650662                        | (T/C)       |
| 30207       | CadSNP5802     | <i>Desi</i>      | Ca_Desig_Chr08               | 4670708                        | (G/A)       |
| 30208       | CadSNP5803     | <i>Desi</i>      | Ca_Desig_Chr08               | 4722955                        | (C/T)       |
| 30209       | CadSNP5804     | <i>Desi</i>      | Ca_Desig_Chr08               | 4745537                        | (A/C)       |

| <b>S.N.</b> | <b>SNP IDs</b> | <b>Cultivars</b> | <b>Chromosomes/scaffolds</b> | <b>Physical positions (bp)</b> | <b>SNPs</b> |
|-------------|----------------|------------------|------------------------------|--------------------------------|-------------|
| 30210       | CadSNP5805     | <i>Desi</i>      | Ca_Desig_Chr08               | 4745665                        | (T/A)       |
| 30211       | CadSNP5806     | <i>Desi</i>      | Ca_Desig_Chr08               | 4745645                        | (A/T)       |
| 30212       | CadSNP5807     | <i>Desi</i>      | Ca_Desig_Chr08               | 4745630                        | (G/A)       |
| 30213       | CadSNP5808     | <i>Desi</i>      | Ca_Desig_Chr08               | 4746255                        | (A/G)       |
| 30214       | CadSNP5809     | <i>Desi</i>      | Ca_Desig_Chr08               | 4748899                        | (T/C)       |
| 30215       | CadSNP5810     | <i>Desi</i>      | Ca_Desig_Chr08               | 4749051                        | (G/A)       |
| 30216       | CadSNP5811     | <i>Desi</i>      | Ca_Desig_Chr08               | 4750203                        | (A/C)       |
| 30217       | CadSNP5812     | <i>Desi</i>      | Ca_Desig_Chr08               | 4796889                        | (C/A)       |
| 30218       | CadSNP5813     | <i>Desi</i>      | Ca_Desig_Chr08               | 4845385                        | (T/G)       |
| 30219       | CadSNP5814     | <i>Desi</i>      | Ca_Desig_Chr08               | 4848732                        | (G/C)       |
| 30220       | CadSNP5815     | <i>Desi</i>      | Ca_Desig_Chr08               | 4848665                        | (T/G)       |
| 30221       | CadSNP5816     | <i>Desi</i>      | Ca_Desig_Chr08               | 4852116                        | (G/A)       |
| 30222       | CadSNP5817     | <i>Desi</i>      | Ca_Desig_Chr08               | 4929357                        | (A/G)       |
| 30223       | CadSNP5818     | <i>Desi</i>      | Ca_Desig_Chr08               | 4930541                        | (G/T)       |
| 30224       | CadSNP5819     | <i>Desi</i>      | Ca_Desig_Chr08               | 4948604                        | (T/G)       |
| 30225       | CadSNP5820     | <i>Desi</i>      | Ca_Desig_Chr08               | 4948624                        | (T/C)       |
| 30226       | CadSNP5821     | <i>Desi</i>      | Ca_Desig_Chr08               | 5022229                        | (A/T)       |
| 30227       | CadSNP5822     | <i>Desi</i>      | Ca_Desig_Chr08               | 5037591                        | (A/G)       |
| 30228       | CadSNP5823     | <i>Desi</i>      | Ca_Desig_Chr08               | 5037646                        | (G/C)       |
| 30229       | CadSNP5824     | <i>Desi</i>      | Ca_Desig_Chr08               | 5040486                        | (C/G)       |
| 30230       | CadSNP5825     | <i>Desi</i>      | Ca_Desig_Chr08               | 5120245                        | (C/G)       |
| 30231       | CadSNP5826     | <i>Desi</i>      | Ca_Desig_Chr08               | 5151607                        | (C/A)       |
| 30232       | CadSNP5827     | <i>Desi</i>      | Ca_Desig_Chr08               | 5151645                        | (A/G)       |
| 30233       | CadSNP5828     | <i>Desi</i>      | Ca_Desig_Chr08               | 5151804                        | (C/A)       |
| 30234       | CadSNP5829     | <i>Desi</i>      | Ca_Desig_Chr08               | 5159313                        | (T/G)       |
| 30235       | CadSNP5830     | <i>Desi</i>      | Ca_Desig_Chr08               | 5174508                        | (A/C)       |
| 30236       | CadSNP5831     | <i>Desi</i>      | Ca_Desig_Chr08               | 5174762                        | (A/G)       |
| 30237       | CadSNP5832     | <i>Desi</i>      | Ca_Desig_Chr08               | 5205685                        | (A/C)       |
| 30238       | CadSNP5833     | <i>Desi</i>      | Ca_Desig_Chr08               | 5208171                        | (C/A)       |
| 30239       | CadSNP5834     | <i>Desi</i>      | Ca_Desig_Chr08               | 5271323                        | (C/A)       |
| 30240       | CadSNP5835     | <i>Desi</i>      | Ca_Desig_Chr08               | 5271413                        | (G/A)       |
| 30241       | CadSNP5836     | <i>Desi</i>      | Ca_Desig_Chr08               | 5292675                        | (C/A)       |
| 30242       | CadSNP5837     | <i>Desi</i>      | Ca_Desig_Chr08               | 5292676                        | (T/C)       |
| 30243       | CadSNP5838     | <i>Desi</i>      | Ca_Desig_Chr08               | 5292677                        | (C/A)       |
| 30244       | CadSNP5839     | <i>Desi</i>      | Ca_Desig_Chr08               | 5292682                        | (A/G)       |
| 30245       | CadSNP5840     | <i>Desi</i>      | Ca_Desig_Chr08               | 5292687                        | (G/A)       |
| 30246       | CadSNP5841     | <i>Desi</i>      | Ca_Desig_Chr08               | 5292691                        | (T/A)       |
| 30247       | CadSNP5842     | <i>Desi</i>      | Ca_Desig_Chr08               | 5292674                        | (A/T)       |

| <b>S.N.</b> | <b>SNP IDs</b> | <b>Cultivars</b> | <b>Chromosomes/scaffolds</b> | <b>Physical positions (bp)</b> | <b>SNPs</b> |
|-------------|----------------|------------------|------------------------------|--------------------------------|-------------|
| 30248       | CadSNP5843     | <i>Desi</i>      | Ca_Desig_Chr08               | 5294080                        | (G/A)       |
| 30249       | CadSNP5844     | <i>Desi</i>      | Ca_Desig_Chr08               | 5294154                        | (G/C)       |
| 30250       | CadSNP5845     | <i>Desi</i>      | Ca_Desig_Chr08               | 5319584                        | (G/A)       |
| 30251       | CadSNP5846     | <i>Desi</i>      | Ca_Desig_Chr08               | 5400701                        | (G/T)       |
| 30252       | CadSNP5847     | <i>Desi</i>      | Ca_Desig_Chr08               | 5400715                        | (C/A)       |
| 30253       | CadSNP5848     | <i>Desi</i>      | Ca_Desig_Chr08               | 5400735                        | (G/A)       |
| 30254       | CadSNP5849     | <i>Desi</i>      | Ca_Desig_Chr08               | 5400749                        | (G/A)       |
| 30255       | CadSNP5850     | <i>Desi</i>      | Ca_Desig_Chr08               | 5400774                        | (C/T)       |
| 30256       | CadSNP5851     | <i>Desi</i>      | Ca_Desig_Chr08               | 5406439                        | (A/G)       |
| 30257       | CadSNP5852     | <i>Desi</i>      | Ca_Desig_Chr08               | 5430520                        | (C/G)       |
| 30258       | CadSNP5853     | <i>Desi</i>      | Ca_Desig_Chr08               | 5430519                        | (C/T)       |
| 30259       | CadSNP5854     | <i>Desi</i>      | Ca_Desig_Chr08               | 5430497                        | (T/C)       |
| 30260       | CadSNP5855     | <i>Desi</i>      | Ca_Desig_Chr08               | 5503559                        | (G/A)       |
| 30261       | CadSNP5856     | <i>Desi</i>      | Ca_Desig_Chr08               | 5538015                        | (G/C)       |
| 30262       | CadSNP5857     | <i>Desi</i>      | Ca_Desig_Chr08               | 5540709                        | (A/T)       |
| 30263       | CadSNP5858     | <i>Desi</i>      | Ca_Desig_Chr08               | 5577326                        | (C/T)       |
| 30264       | CadSNP5859     | <i>Desi</i>      | Ca_Desig_Chr08               | 5598377                        | (T/C)       |
| 30265       | CadSNP5860     | <i>Desi</i>      | Ca_Desig_Chr08               | 5629715                        | (A/G)       |
| 30266       | CadSNP5861     | <i>Desi</i>      | Ca_Desig_Chr08               | 5629764                        | (A/T)       |
| 30267       | CadSNP5862     | <i>Desi</i>      | Ca_Desig_Chr08               | 5629818                        | (C/T)       |
| 30268       | CadSNP5863     | <i>Desi</i>      | Ca_Desig_Chr08               | 5629820                        | (G/C)       |
| 30269       | CadSNP5864     | <i>Desi</i>      | Ca_Desig_Chr08               | 5629867                        | (G/C)       |
| 30270       | CadSNP5865     | <i>Desi</i>      | Ca_Desig_Chr08               | 5629880                        | (T/C)       |
| 30271       | CadSNP5866     | <i>Desi</i>      | Ca_Desig_Chr08               | 5639572                        | (T/A)       |
| 30272       | CadSNP5867     | <i>Desi</i>      | Ca_Desig_Chr08               | 5676674                        | (C/G)       |
| 30273       | CadSNP5868     | <i>Desi</i>      | Ca_Desig_Chr08               | 5676675                        | (C/T)       |
| 30274       | CadSNP5869     | <i>Desi</i>      | Ca_Desig_Chr08               | 5692680                        | (G/T)       |
| 30275       | CadSNP5870     | <i>Desi</i>      | Ca_Desig_Chr08               | 5692686                        | (G/T)       |
| 30276       | CadSNP5871     | <i>Desi</i>      | Ca_Desig_Chr08               | 5692691                        | (A/T)       |
| 30277       | CadSNP5872     | <i>Desi</i>      | Ca_Desig_Chr08               | 5692716                        | (A/T)       |
| 30278       | CadSNP5873     | <i>Desi</i>      | Ca_Desig_Chr08               | 5741859                        | (A/G)       |
| 30279       | CadSNP5874     | <i>Desi</i>      | Ca_Desig_Chr08               | 5839054                        | (C/T)       |
| 30280       | CadSNP5875     | <i>Desi</i>      | Ca_Desig_Chr08               | 5859673                        | (A/G)       |
| 30281       | CadSNP5876     | <i>Desi</i>      | Ca_Desig_Chr08               | 5873045                        | (G/T)       |
| 30282       | CadSNP5877     | <i>Desi</i>      | Ca_Desig_Chr08               | 5873046                        | (G/C)       |
| 30283       | CadSNP5878     | <i>Desi</i>      | Ca_Desig_Chr08               | 5893623                        | (G/C)       |
| 30284       | CadSNP5879     | <i>Desi</i>      | Ca_Desig_Chr08               | 5893717                        | (A/C)       |
| 30285       | CadSNP5880     | <i>Desi</i>      | Ca_Desig_Chr08               | 5894433                        | (A/T)       |

| <b>S.N.</b> | <b>SNP IDs</b> | <b>Cultivars</b> | <b>Chromosomes/scaffolds</b> | <b>Physical positions (bp)</b> | <b>SNPs</b> |
|-------------|----------------|------------------|------------------------------|--------------------------------|-------------|
| 30286       | CadSNP5881     | <i>Desi</i>      | Ca_Desig_Chr08               | 5894563                        | (C/T)       |
| 30287       | CadSNP5882     | <i>Desi</i>      | Ca_Desig_Chr08               | 5902520                        | (C/T)       |
| 30288       | CadSNP5883     | <i>Desi</i>      | Ca_Desig_Chr08               | 5937874                        | (G/C)       |
| 30289       | CadSNP5884     | <i>Desi</i>      | Ca_Desig_Chr08               | 5937873                        | (C/T)       |
| 30290       | CadSNP5885     | <i>Desi</i>      | Ca_Desig_Chr08               | 5955260                        | (T/G)       |
| 30291       | CadSNP5886     | <i>Desi</i>      | Ca_Desig_Chr08               | 5955310                        | (T/G)       |
| 30292       | CadSNP5887     | <i>Desi</i>      | Ca_Desig_Chr08               | 5997392                        | (G/C)       |
| 30293       | CadSNP5888     | <i>Desi</i>      | Ca_Desig_Chr08               | 6011053                        | (A/G)       |
| 30294       | CadSNP5889     | <i>Desi</i>      | Ca_Desig_Chr08               | 6018260                        | (A/G)       |
| 30295       | CadSNP5890     | <i>Desi</i>      | Ca_Desig_Chr08               | 6018400                        | (A/T)       |
| 30296       | CadSNP5891     | <i>Desi</i>      | Ca_Desig_Chr08               | 6021810                        | (C/T)       |
| 30297       | CadSNP5892     | <i>Desi</i>      | Ca_Desig_Chr08               | 6039116                        | (G/C)       |
| 30298       | CadSNP5893     | <i>Desi</i>      | Ca_Desig_Chr08               | 6121913                        | (A/G)       |
| 30299       | CadSNP5894     | <i>Desi</i>      | Ca_Desig_Chr08               | 6122035                        | (G/A)       |
| 30300       | CadSNP5895     | <i>Desi</i>      | Ca_Desig_Chr08               | 6122066                        | (A/C)       |
| 30301       | CadSNP5896     | <i>Desi</i>      | Ca_Desig_Chr08               | 6122067                        | (G/T)       |
| 30302       | CadSNP5897     | <i>Desi</i>      | Ca_Desig_Chr08               | 6125494                        | (T/C)       |
| 30303       | CadSNP5898     | <i>Desi</i>      | Ca_Desig_Chr08               | 6135840                        | (T/A)       |
| 30304       | CadSNP5899     | <i>Desi</i>      | Ca_Desig_Chr08               | 6212381                        | (G/A)       |
| 30305       | CadSNP5900     | <i>Desi</i>      | Ca_Desig_Chr08               | 6222792                        | (A/T)       |
| 30306       | CadSNP5901     | <i>Desi</i>      | Ca_Desig_Chr08               | 6238450                        | (T/C)       |
| 30307       | CadSNP5902     | <i>Desi</i>      | Ca_Desig_Chr08               | 6240892                        | (G/C)       |
| 30308       | CadSNP5903     | <i>Desi</i>      | Ca_Desig_Chr08               | 6253648                        | (C/T)       |
| 30309       | CadSNP5904     | <i>Desi</i>      | Ca_Desig_Chr08               | 6253665                        | (C/T)       |
| 30310       | CadSNP5905     | <i>Desi</i>      | Ca_Desig_Chr08               | 6253685                        | (T/G)       |
| 30311       | CadSNP5906     | <i>Desi</i>      | Ca_Desig_Chr08               | 6278277                        | (G/A)       |
| 30312       | CadSNP5907     | <i>Desi</i>      | Ca_Desig_Chr08               | 6284361                        | (C/T)       |
| 30313       | CadSNP5908     | <i>Desi</i>      | Ca_Desig_Chr08               | 6337453                        | (G/A)       |
| 30314       | CadSNP5909     | <i>Desi</i>      | Ca_Desig_Chr08               | 6392071                        | (C/A)       |
| 30315       | CadSNP5910     | <i>Desi</i>      | Ca_Desig_Chr08               | 6416846                        | (A/T)       |
| 30316       | CadSNP5911     | <i>Desi</i>      | Ca_Desig_Chr08               | 6631093                        | (C/T)       |
| 30317       | CadSNP5912     | <i>Desi</i>      | Ca_Desig_Chr08               | 6694033                        | (G/A)       |
| 30318       | CadSNP5913     | <i>Desi</i>      | Ca_Desig_Chr08               | 6694662                        | (A/T)       |
| 30319       | CadSNP5914     | <i>Desi</i>      | Ca_Desig_Chr08               | 6694683                        | (T/G)       |
| 30320       | CadSNP5915     | <i>Desi</i>      | Ca_Desig_Chr08               | 6694902                        | (C/A)       |
| 30321       | CadSNP5916     | <i>Desi</i>      | Ca_Desig_Chr08               | 6748878                        | (G/A)       |
| 30322       | CadSNP5917     | <i>Desi</i>      | Ca_Desig_Chr08               | 6802993                        | (C/T)       |
| 30323       | CadSNP5918     | <i>Desi</i>      | Ca_Desig_Chr08               | 6802986                        | (G/A)       |



| <b>S.N.</b> | <b>SNP IDs</b> | <b>Cultivars</b> | <b>Chromosomes/scaffolds</b> | <b>Physical positions (bp)</b> | <b>SNPs</b> |
|-------------|----------------|------------------|------------------------------|--------------------------------|-------------|
| 30324       | CadSNP5919     | <i>Desi</i>      | Ca_Desig_Chr08               | 6802977                        | (G/T)       |
| 30325       | CadSNP5920     | <i>Desi</i>      | Ca_Desig_Chr08               | 6812169                        | (A/C)       |
| 30326       | CadSNP5921     | <i>Desi</i>      | Ca_Desig_Chr08               | 6890398                        | (G/A)       |
| 30327       | CadSNP5922     | <i>Desi</i>      | Ca_Desig_Chr08               | 6890396                        | (T/C)       |
| 30328       | CadSNP5923     | <i>Desi</i>      | Ca_Desig_Chr08               | 6929295                        | (T/C)       |
| 30329       | CadSNP5924     | <i>Desi</i>      | Ca_Desig_Chr08               | 6929305                        | (T/G)       |
| 30330       | CadSNP5925     | <i>Desi</i>      | Ca_Desig_Chr08               | 6929347                        | (C/T)       |
| 30331       | CadSNP5926     | <i>Desi</i>      | Ca_Desig_Chr08               | 6932494                        | (C/A)       |
| 30332       | CadSNP5927     | <i>Desi</i>      | Ca_Desig_Chr08               | 6932498                        | (T/C)       |
| 30333       | CadSNP5928     | <i>Desi</i>      | Ca_Desig_Chr08               | 6949072                        | (T/C)       |
| 30334       | CadSNP5929     | <i>Desi</i>      | Ca_Desig_Chr08               | 7061357                        | (C/G)       |
| 30335       | CadSNP5930     | <i>Desi</i>      | Ca_Desig_Chr08               | 7680841                        | (T/C)       |
| 30336       | CadSNP5931     | <i>Desi</i>      | Ca_Desig_Chr08               | 7684726                        | (C/G)       |
| 30337       | CadSNP5932     | <i>Desi</i>      | Ca_Desig_Chr08               | 7684806                        | (G/A)       |
| 30338       | CadSNP5933     | <i>Desi</i>      | Ca_Desig_Chr08               | 7756294                        | (T/C)       |
| 30339       | CadSNP5934     | <i>Desi</i>      | Ca_Desig_Chr08               | 7756311                        | (T/C)       |
| 30340       | CadSNP5935     | <i>Desi</i>      | Ca_Desig_Chr08               | 7756328                        | (T/C)       |
| 30341       | CadSNP5936     | <i>Desi</i>      | Ca_Desig_Chr08               | 7756398                        | (G/C)       |
| 30342       | CadSNP5937     | <i>Desi</i>      | Ca_Desig_Chr08               | 7776321                        | (A/C)       |
| 30343       | CadSNP5938     | <i>Desi</i>      | Ca_Desig_Chr08               | 7809130                        | (T/G)       |
| 30344       | CadSNP5939     | <i>Desi</i>      | Ca_Desig_Chr08               | 7809672                        | (C/A)       |
| 30345       | CadSNP5940     | <i>Desi</i>      | Ca_Desig_Chr08               | 7809777                        | (A/G)       |
| 30346       | CadSNP5941     | <i>Desi</i>      | Ca_Desig_Chr08               | 7809729                        | (C/T)       |
| 30347       | CadSNP5942     | <i>Desi</i>      | Ca_Desig_Chr08               | 7856284                        | (C/T)       |
| 30348       | CadSNP5943     | <i>Desi</i>      | Ca_Desig_Chr08               | 7860706                        | (A/G)       |
| 30349       | CadSNP5944     | <i>Desi</i>      | Ca_Desig_Chr08               | 7868393                        | (C/T)       |
| 30350       | CadSNP5945     | <i>Desi</i>      | Ca_Desig_Chr08               | 7878071                        | (G/C)       |
| 30351       | CadSNP5946     | <i>Desi</i>      | Ca_Desig_Chr08               | 7878017                        | (C/T)       |
| 30352       | CadSNP5947     | <i>Desi</i>      | Ca_Desig_Chr08               | 7883104                        | (C/G)       |
| 30353       | CadSNP5948     | <i>Desi</i>      | Ca_Desig_Chr08               | 7915994                        | (T/C)       |
| 30354       | CadSNP5949     | <i>Desi</i>      | Ca_Desig_Chr08               | 7921680                        | (G/T)       |
| 30355       | CadSNP5950     | <i>Desi</i>      | Ca_Desig_Chr08               | 7979383                        | (C/T)       |
| 30356       | CadSNP5951     | <i>Desi</i>      | Ca_Desig_Chr08               | 8004558                        | (C/A)       |
| 30357       | CadSNP5952     | <i>Desi</i>      | Ca_Desig_Chr08               | 8004529                        | (C/T)       |
| 30358       | CadSNP5953     | <i>Desi</i>      | Ca_Desig_Chr08               | 8039844                        | (T/C)       |
| 30359       | CadSNP5954     | <i>Desi</i>      | Ca_Desig_Chr08               | 8065243                        | (A/G)       |
| 30360       | CadSNP5955     | <i>Desi</i>      | Ca_Desig_Chr08               | 8075399                        | (T/G)       |
| 30361       | CadSNP5956     | <i>Desi</i>      | Ca_Desig_Chr08               | 8096136                        | (G/T)       |

| <b>S.N.</b> | <b>SNP IDs</b> | <b>Cultivars</b> | <b>Chromosomes/scaffolds</b> | <b>Physical positions (bp)</b> | <b>SNPs</b> |
|-------------|----------------|------------------|------------------------------|--------------------------------|-------------|
| 30362       | CadSNP5957     | <i>Desi</i>      | Ca_Desig_Chr08               | 8098674                        | (G/A)       |
| 30363       | CadSNP5958     | <i>Desi</i>      | Ca_Desig_Chr08               | 8120364                        | (C/T)       |
| 30364       | CadSNP5959     | <i>Desi</i>      | Ca_Desig_Chr08               | 8120375                        | (G/C)       |
| 30365       | CadSNP5960     | <i>Desi</i>      | Ca_Desig_Chr08               | 8120379                        | (T/G)       |
| 30366       | CadSNP5961     | <i>Desi</i>      | Ca_Desig_Chr08               | 8120385                        | (G/A)       |
| 30367       | CadSNP5962     | <i>Desi</i>      | Ca_Desig_Chr08               | 8120395                        | (G/C)       |
| 30368       | CadSNP5963     | <i>Desi</i>      | Ca_Desig_Chr08               | 8120407                        | (C/T)       |
| 30369       | CadSNP5964     | <i>Desi</i>      | Ca_Desig_Chr08               | 8124369                        | (T/G)       |
| 30370       | CadSNP5965     | <i>Desi</i>      | Ca_Desig_Chr08               | 8143246                        | (G/A)       |
| 30371       | CadSNP5966     | <i>Desi</i>      | Ca_Desig_Chr08               | 8163286                        | (C/T)       |
| 30372       | CadSNP5967     | <i>Desi</i>      | Ca_Desig_Chr08               | 8163303                        | (C/G)       |
| 30373       | CadSNP5968     | <i>Desi</i>      | Ca_Desig_Chr08               | 8174457                        | (A/G)       |
| 30374       | CadSNP5969     | <i>Desi</i>      | Ca_Desig_Chr08               | 8174515                        | (C/G)       |
| 30375       | CadSNP5970     | <i>Desi</i>      | Ca_Desig_Chr08               | 8174513                        | (T/A)       |
| 30376       | CadSNP5971     | <i>Desi</i>      | Ca_Desig_Chr08               | 8174507                        | (A/C)       |
| 30377       | CadSNP5972     | <i>Desi</i>      | Ca_Desig_Chr08               | 8188712                        | (T/G)       |
| 30378       | CadSNP5973     | <i>Desi</i>      | Ca_Desig_Chr08               | 8199266                        | (C/A)       |
| 30379       | CadSNP5974     | <i>Desi</i>      | Ca_Desig_Chr08               | 8199337                        | (C/T)       |
| 30380       | CadSNP5975     | <i>Desi</i>      | Ca_Desig_Chr08               | 8215540                        | (A/G)       |
| 30381       | CadSNP5976     | <i>Desi</i>      | Ca_Desig_Chr08               | 8224144                        | (A/C)       |
| 30382       | CadSNP5977     | <i>Desi</i>      | Ca_Desig_Chr08               | 8226513                        | (G/T)       |
| 30383       | CadSNP5978     | <i>Desi</i>      | Ca_Desig_Chr08               | 8226615                        | (G/A)       |
| 30384       | CadSNP5979     | <i>Desi</i>      | Ca_Desig_Chr08               | 8226567                        | (G/A)       |
| 30385       | CadSNP5980     | <i>Desi</i>      | Ca_Desig_Chr08               | 8237858                        | (A/G)       |
| 30386       | CadSNP5981     | <i>Desi</i>      | Ca_Desig_Chr08               | 8253246                        | (T/C)       |
| 30387       | CadSNP5982     | <i>Desi</i>      | Ca_Desig_Chr08               | 8254383                        | (T/G)       |
| 30388       | CadSNP5983     | <i>Desi</i>      | Ca_Desig_Chr08               | 8293821                        | (C/T)       |
| 30389       | CadSNP5984     | <i>Desi</i>      | Ca_Desig_Chr08               | 8394443                        | (A/T)       |
| 30390       | CadSNP5985     | <i>Desi</i>      | Ca_Desig_Chr08               | 8415354                        | (A/G)       |
| 30391       | CadSNP5986     | <i>Desi</i>      | Ca_Desig_Chr08               | 8415346                        | (G/T)       |
| 30392       | CadSNP5987     | <i>Desi</i>      | Ca_Desig_Chr08               | 8429606                        | (C/T)       |
| 30393       | CadSNP5988     | <i>Desi</i>      | Ca_Desig_Chr08               | 8429636                        | (G/A)       |
| 30394       | CadSNP5989     | <i>Desi</i>      | Ca_Desig_Chr08               | 8432968                        | (T/G)       |
| 30395       | CadSNP5990     | <i>Desi</i>      | Ca_Desig_Chr08               | 8432964                        | (A/C)       |
| 30396       | CadSNP5991     | <i>Desi</i>      | Ca_Desig_Chr08               | 8432958                        | (A/T)       |
| 30397       | CadSNP5992     | <i>Desi</i>      | Ca_Desig_Chr08               | 8432922                        | (C/A)       |
| 30398       | CadSNP5993     | <i>Desi</i>      | Ca_Desig_Chr08               | 8461064                        | (C/T)       |
| 30399       | CadSNP5994     | <i>Desi</i>      | Ca_Desig_Chr08               | 8461132                        | (C/T)       |

| <b>S.N.</b> | <b>SNP IDs</b> | <b>Cultivars</b> | <b>Chromosomes/scaffolds</b> | <b>Physical positions (bp)</b> | <b>SNPs</b> |
|-------------|----------------|------------------|------------------------------|--------------------------------|-------------|
| 30400       | CadSNP5995     | <i>Desi</i>      | Ca_Desig_Chr08               | 8461106                        | (C/A)       |
| 30401       | CadSNP5996     | <i>Desi</i>      | Ca_Desig_Chr08               | 8527616                        | (A/C)       |
| 30402       | CadSNP5997     | <i>Desi</i>      | Ca_Desig_Chr08               | 8527697                        | (T/C)       |
| 30403       | CadSNP5998     | <i>Desi</i>      | Ca_Desig_Chr08               | 8527828                        | (C/G)       |
| 30404       | CadSNP5999     | <i>Desi</i>      | Ca_Desig_Chr08               | 8527853                        | (G/A)       |
| 30405       | CadSNP6000     | <i>Desi</i>      | Ca_Desig_Chr08               | 8527968                        | (C/A)       |
| 30406       | CadSNP6001     | <i>Desi</i>      | Ca_Desig_Chr08               | 8529997                        | (C/T)       |
| 30407       | CadSNP6002     | <i>Desi</i>      | Ca_Desig_Chr08               | 8530011                        | (T/C)       |
| 30408       | CadSNP6003     | <i>Desi</i>      | Ca_Desig_Chr08               | 8530040                        | (A/G)       |
| 30409       | CadSNP6004     | <i>Desi</i>      | Ca_Desig_Chr08               | 8530148                        | (G/T)       |
| 30410       | CadSNP6005     | <i>Desi</i>      | Ca_Desig_Chr08               | 8547790                        | (C/A)       |
| 30411       | CadSNP6006     | <i>Desi</i>      | Ca_Desig_Chr08               | 8567577                        | (T/G)       |
| 30412       | CadSNP6007     | <i>Desi</i>      | Ca_Desig_Chr08               | 8581939                        | (C/A)       |
| 30413       | CadSNP6008     | <i>Desi</i>      | Ca_Desig_Chr08               | 8714190                        | (C/A)       |
| 30414       | CadSNP6009     | <i>Desi</i>      | Ca_Desig_Chr08               | 8714880                        | (C/G)       |
| 30415       | CadSNP6010     | <i>Desi</i>      | Ca_Desig_Chr08               | 8714927                        | (G/A)       |
| 30416       | CadSNP6011     | <i>Desi</i>      | Ca_Desig_Chr08               | 8714972                        | (G/C)       |
| 30417       | CadSNP6012     | <i>Desi</i>      | Ca_Desig_Chr08               | 8715060                        | (T/A)       |
| 30418       | CadSNP6013     | <i>Desi</i>      | Ca_Desig_Chr08               | 8714991                        | (A/C)       |
| 30419       | CadSNP6014     | <i>Desi</i>      | Ca_Desig_Chr08               | 8714989                        | (G/C)       |
| 30420       | CadSNP6015     | <i>Desi</i>      | Ca_Desig_Chr08               | 8808195                        | (T/C)       |
| 30421       | CadSNP6016     | <i>Desi</i>      | Ca_Desig_Chr08               | 8808193                        | (T/C)       |
| 30422       | CadSNP6017     | <i>Desi</i>      | Ca_Desig_Chr08               | 8980491                        | (A/G)       |
| 30423       | CadSNP6018     | <i>Desi</i>      | Ca_Desig_Chr08               | 8980494                        | (C/T)       |
| 30424       | CadSNP6019     | <i>Desi</i>      | Ca_Desig_Chr08               | 9028576                        | (C/G)       |
| 30425       | CadSNP6020     | <i>Desi</i>      | Ca_Desig_Chr08               | 9066626                        | (A/C)       |
| 30426       | CadSNP6021     | <i>Desi</i>      | Ca_Desig_Chr08               | 9934682                        | (C/T)       |
| 30427       | CadSNP6022     | <i>Desi</i>      | Ca_Desig_Chr08               | 9988643                        | (T/C)       |
| 30428       | CadSNP6023     | <i>Desi</i>      | Ca_Desig_Chr08               | 10010315                       | (G/C)       |
| 30429       | CadSNP6024     | <i>Desi</i>      | Ca_Desig_Chr08               | 10010317                       | (A/T)       |
| 30430       | CadSNP6025     | <i>Desi</i>      | Ca_Desig_Chr08               | 10010422                       | (G/T)       |
| 30431       | CadSNP6026     | <i>Desi</i>      | Ca_Desig_Chr08               | 10010446                       | (T/G)       |
| 30432       | CadSNP6027     | <i>Desi</i>      | Ca_Desig_Chr08               | 10010518                       | (G/A)       |
| 30433       | CadSNP6028     | <i>Desi</i>      | Ca_Desig_Chr08               | 10011198                       | (G/C)       |
| 30434       | CadSNP6029     | <i>Desi</i>      | Ca_Desig_Chr08               | 10011218                       | (C/T)       |
| 30435       | CadSNP6030     | <i>Desi</i>      | Ca_Desig_Chr08               | 10033171                       | (T/G)       |
| 30436       | CadSNP6031     | <i>Desi</i>      | Ca_Desig_Chr08               | 10043503                       | (C/G)       |
| 30437       | CadSNP6032     | <i>Desi</i>      | Ca_Desig_Chr08               | 10043506                       | (A/G)       |

| <b>S.N.</b> | <b>SNP IDs</b> | <b>Cultivars</b> | <b>Chromosomes/scaffolds</b> | <b>Physical positions (bp)</b> | <b>SNPs</b> |
|-------------|----------------|------------------|------------------------------|--------------------------------|-------------|
| 30438       | CadSNP6033     | <i>Desi</i>      | Ca_Desig_Chr08               | 10043515                       | (C/T)       |
| 30439       | CadSNP6034     | <i>Desi</i>      | Ca_Desig_Chr08               | 10089756                       | (G/A)       |
| 30440       | CadSNP6035     | <i>Desi</i>      | Ca_Desig_Chr08               | 10089757                       | (A/G)       |
| 30441       | CadSNP6036     | <i>Desi</i>      | Ca_Desig_Chr08               | 10092547                       | (G/C)       |
| 30442       | CadSNP6037     | <i>Desi</i>      | Ca_Desig_Chr08               | 10118207                       | (C/A)       |
| 30443       | CadSNP6038     | <i>Desi</i>      | Ca_Desig_Chr08               | 10126050                       | (A/C)       |
| 30444       | CadSNP6039     | <i>Desi</i>      | Ca_Desig_Chr08               | 10138245                       | (T/G)       |
| 30445       | CadSNP6040     | <i>Desi</i>      | Ca_Desig_Chr08               | 10138459                       | (T/C)       |
| 30446       | CadSNP6041     | <i>Desi</i>      | Ca_Desig_Chr08               | 10139121                       | (T/C)       |
| 30447       | CadSNP6042     | <i>Desi</i>      | Ca_Desig_Chr08               | 10139184                       | (G/T)       |
| 30448       | CadSNP6043     | <i>Desi</i>      | Ca_Desig_Chr08               | 10146785                       | (T/G)       |
| 30449       | CadSNP6044     | <i>Desi</i>      | Ca_Desig_Chr08               | 10146937                       | (A/G)       |
| 30450       | CadSNP6045     | <i>Desi</i>      | Ca_Desig_Chr08               | 10147096                       | (A/G)       |
| 30451       | CadSNP6046     | <i>Desi</i>      | Ca_Desig_Chr08               | 10147052                       | (C/A)       |
| 30452       | CadSNP6047     | <i>Desi</i>      | Ca_Desig_Chr08               | 10156188                       | (G/C)       |
| 30453       | CadSNP6048     | <i>Desi</i>      | Ca_Desig_Chr08               | 10156217                       | (G/T)       |
| 30454       | CadSNP6049     | <i>Desi</i>      | Ca_Desig_Chr08               | 10179564                       | (G/T)       |
| 30455       | CadSNP6050     | <i>Desi</i>      | Ca_Desig_Chr08               | 10186069                       | (C/A)       |
| 30456       | CadSNP6051     | <i>Desi</i>      | Ca_Desig_Chr08               | 10194865                       | (G/T)       |
| 30457       | CadSNP6052     | <i>Desi</i>      | Ca_Desig_Chr08               | 10194837                       | (A/G)       |
| 30458       | CadSNP6053     | <i>Desi</i>      | Ca_Desig_Chr08               | 10199366                       | (G/C)       |
| 30459       | CadSNP6054     | <i>Desi</i>      | Ca_Desig_Chr08               | 10219563                       | (T/C)       |
| 30460       | CadSNP6055     | <i>Desi</i>      | Ca_Desig_Chr08               | 10219601                       | (G/T)       |
| 30461       | CadSNP6056     | <i>Desi</i>      | Ca_Desig_Chr08               | 10222573                       | (G/A)       |
| 30462       | CadSNP6057     | <i>Desi</i>      | Ca_Desig_Chr08               | 10222561                       | (G/A)       |
| 30463       | CadSNP6058     | <i>Desi</i>      | Ca_Desig_Chr08               | 10366770                       | (G/T)       |
| 30464       | CadSNP6059     | <i>Desi</i>      | Ca_Desig_Chr08               | 10366757                       | (A/G)       |
| 30465       | CadSNP6060     | <i>Desi</i>      | Ca_Desig_Chr08               | 10366745                       | (T/C)       |
| 30466       | CadSNP6061     | <i>Desi</i>      | Ca_Desig_Chr08               | 10366740                       | (A/G)       |
| 30467       | CadSNP6062     | <i>Desi</i>      | Ca_Desig_Chr08               | 10405441                       | (G/C)       |
| 30468       | CadSNP6063     | <i>Desi</i>      | Ca_Desig_Chr08               | 10443585                       | (A/C)       |
| 30469       | CadSNP6064     | <i>Desi</i>      | Ca_Desig_Scaffold00032       | 30276                          | (G/C)       |
| 30470       | CadSNP6065     | <i>Desi</i>      | Ca_Desig_Scaffold00032       | 78989                          | (T/C)       |
| 30471       | CadSNP6066     | <i>Desi</i>      | Ca_Desig_Scaffold00032       | 80728                          | (G/C)       |
| 30472       | CadSNP6067     | <i>Desi</i>      | Ca_Desig_Scaffold00032       | 210202                         | (G/T)       |
| 30473       | CadSNP6068     | <i>Desi</i>      | Ca_Desig_Scaffold00032       | 414217                         | (A/G)       |
| 30474       | CadSNP6069     | <i>Desi</i>      | Ca_Desig_Scaffold00032       | 536497                         | (G/A)       |
| 30475       | CadSNP6070     | <i>Desi</i>      | Ca_Desig_Scaffold00046       | 280957                         | (C/T)       |

| <b>S.N.</b> | <b>SNP IDs</b> | <b>Cultivars</b> | <b>Chromosomes/scaffolds</b> | <b>Physical positions (bp)</b> | <b>SNPs</b> |
|-------------|----------------|------------------|------------------------------|--------------------------------|-------------|
| 30476       | CadSNP6071     | <i>Desi</i>      | Ca_Desig_Scaffold00046       | 282484                         | (A/G)       |
| 30477       | CadSNP6072     | <i>Desi</i>      | Ca_Desig_Scaffold00046       | 285942                         | (A/C)       |
| 30478       | CadSNP6073     | <i>Desi</i>      | Ca_Desig_Scaffold00046       | 286011                         | (T/A)       |
| 30479       | CadSNP6074     | <i>Desi</i>      | Ca_Desig_Scaffold00046       | 286009                         | (G/A)       |
| 30480       | CadSNP6075     | <i>Desi</i>      | Ca_Desig_Scaffold00046       | 286700                         | (T/C)       |
| 30481       | CadSNP6076     | <i>Desi</i>      | Ca_Desig_Scaffold00046       | 301107                         | (T/A)       |
| 30482       | CadSNP6077     | <i>Desi</i>      | Ca_Desig_Scaffold00046       | 386326                         | (C/T)       |
| 30483       | CadSNP6078     | <i>Desi</i>      | Ca_Desig_Scaffold00046       | 386310                         | (A/G)       |
| 30484       | CadSNP6079     | <i>Desi</i>      | Ca_Desig_Scaffold00046       | 386585                         | (A/G)       |
| 30485       | CadSNP6080     | <i>Desi</i>      | Ca_Desig_Scaffold00046       | 386568                         | (A/G)       |
| 30486       | CadSNP6081     | <i>Desi</i>      | Ca_Desig_Scaffold00046       | 421228                         | (C/A)       |
| 30487       | CadSNP6082     | <i>Desi</i>      | Ca_Desig_Scaffold00046       | 421235                         | (T/A)       |
| 30488       | CadSNP6083     | <i>Desi</i>      | Ca_Desig_Scaffold00046       | 421370                         | (G/A)       |
| 30489       | CadSNP6084     | <i>Desi</i>      | Ca_Desig_Scaffold00046       | 486628                         | (G/A)       |
| 30490       | CadSNP6085     | <i>Desi</i>      | Ca_Desig_Scaffold00046       | 522703                         | (T/C)       |
| 30491       | CadSNP6086     | <i>Desi</i>      | Ca_Desig_Scaffold00046       | 522682                         | (C/T)       |
| 30492       | CadSNP6087     | <i>Desi</i>      | Ca_Desig_Scaffold00046       | 570171                         | (T/C)       |
| 30493       | CadSNP6088     | <i>Desi</i>      | Ca_Desig_Scaffold00055       | 41146                          | (A/C)       |
| 30494       | CadSNP6089     | <i>Desi</i>      | Ca_Desig_Scaffold00055       | 41149                          | (T/G)       |
| 30495       | CadSNP6090     | <i>Desi</i>      | Ca_Desig_Scaffold00055       | 41151                          | (G/A)       |
| 30496       | CadSNP6091     | <i>Desi</i>      | Ca_Desig_Scaffold00055       | 41154                          | (A/C)       |
| 30497       | CadSNP6092     | <i>Desi</i>      | Ca_Desig_Scaffold00055       | 41160                          | (G/A)       |
| 30498       | CadSNP6093     | <i>Desi</i>      | Ca_Desig_Scaffold00055       | 141965                         | (A/C)       |
| 30499       | CadSNP6094     | <i>Desi</i>      | Ca_Desig_Scaffold00055       | 141952                         | (T/A)       |
| 30500       | CadSNP6095     | <i>Desi</i>      | Ca_Desig_Scaffold00055       | 141943                         | (G/C)       |
| 30501       | CadSNP6096     | <i>Desi</i>      | Ca_Desig_Scaffold00055       | 141942                         | (T/C)       |
| 30502       | CadSNP6097     | <i>Desi</i>      | Ca_Desig_Scaffold00055       | 149867                         | (A/G)       |
| 30503       | CadSNP6098     | <i>Desi</i>      | Ca_Desig_Scaffold00055       | 149866                         | (C/G)       |
| 30504       | CadSNP6099     | <i>Desi</i>      | Ca_Desig_Scaffold00055       | 149857                         | (A/T)       |
| 30505       | CadSNP6100     | <i>Desi</i>      | Ca_Desig_Scaffold00055       | 149844                         | (T/G)       |
| 30506       | CadSNP6101     | <i>Desi</i>      | Ca_Desig_Scaffold00055       | 275942                         | (T/G)       |
| 30507       | CadSNP6102     | <i>Desi</i>      | Ca_Desig_Scaffold00055       | 317961                         | (A/G)       |
| 30508       | CadSNP6103     | <i>Desi</i>      | Ca_Desig_Scaffold00055       | 317976                         | (A/C)       |
| 30509       | CadSNP6104     | <i>Desi</i>      | Ca_Desig_Scaffold00055       | 318019                         | (T/C)       |
| 30510       | CadSNP6105     | <i>Desi</i>      | Ca_Desig_Scaffold00055       | 318023                         | (C/G)       |
| 30511       | CadSNP6106     | <i>Desi</i>      | Ca_Desig_Scaffold00055       | 379842                         | (G/T)       |
| 30512       | CadSNP6107     | <i>Desi</i>      | Ca_Desig_Scaffold00073       | 80464                          | (A/G)       |
| 30513       | CadSNP6108     | <i>Desi</i>      | Ca_Desig_Scaffold00073       | 85672                          | (T/G)       |

| <b>S.N.</b> | <b>SNP IDs</b> | <b>Cultivars</b> | <b>Chromosomes/scaffolds</b> | <b>Physical positions (bp)</b> | <b>SNPs</b> |
|-------------|----------------|------------------|------------------------------|--------------------------------|-------------|
| 30514       | CadSNP6109     | <i>Desi</i>      | Ca_Desig_Scaffold00073       | 150670                         | (C/A)       |
| 30515       | CadSNP6110     | <i>Desi</i>      | Ca_Desig_Scaffold00073       | 184051                         | (T/C)       |
| 30516       | CadSNP6111     | <i>Desi</i>      | Ca_Desig_Scaffold00073       | 213846                         | (C/T)       |
| 30517       | CadSNP6112     | <i>Desi</i>      | Ca_Desig_Scaffold00073       | 257738                         | (G/T)       |
| 30518       | CadSNP6113     | <i>Desi</i>      | Ca_Desig_Scaffold00073       | 271762                         | (G/A)       |
| 30519       | CadSNP6114     | <i>Desi</i>      | Ca_Desig_Scaffold00073       | 301422                         | (G/A)       |
| 30520       | CadSNP6115     | <i>Desi</i>      | Ca_Desig_Scaffold00073       | 301454                         | (G/C)       |
| 30521       | CadSNP6116     | <i>Desi</i>      | Ca_Desig_Scaffold00073       | 341240                         | (A/G)       |
| 30522       | CadSNP6117     | <i>Desi</i>      | Ca_Desig_Scaffold00077       | 4479                           | (C/T)       |
| 30523       | CadSNP6118     | <i>Desi</i>      | Ca_Desig_Scaffold00077       | 16591                          | (T/A)       |
| 30524       | CadSNP6119     | <i>Desi</i>      | Ca_Desig_Scaffold00077       | 16736                          | (G/A)       |
| 30525       | CadSNP6120     | <i>Desi</i>      | Ca_Desig_Scaffold00077       | 16751                          | (A/T)       |
| 30526       | CadSNP6121     | <i>Desi</i>      | Ca_Desig_Scaffold00077       | 16906                          | (G/A)       |
| 30527       | CadSNP6122     | <i>Desi</i>      | Ca_Desig_Scaffold00077       | 85007                          | (T/G)       |
| 30528       | CadSNP6123     | <i>Desi</i>      | Ca_Desig_Scaffold00077       | 130429                         | (G/C)       |
| 30529       | CadSNP6124     | <i>Desi</i>      | Ca_Desig_Scaffold00077       | 130428                         | (A/T)       |
| 30530       | CadSNP6125     | <i>Desi</i>      | Ca_Desig_Scaffold00077       | 141979                         | (C/G)       |
| 30531       | CadSNP6126     | <i>Desi</i>      | Ca_Desig_Scaffold00077       | 142047                         | (C/T)       |
| 30532       | CadSNP6127     | <i>Desi</i>      | Ca_Desig_Scaffold00077       | 142074                         | (C/A)       |
| 30533       | CadSNP6128     | <i>Desi</i>      | Ca_Desig_Scaffold00077       | 144387                         | (G/A)       |
| 30534       | CadSNP6129     | <i>Desi</i>      | Ca_Desig_Scaffold00077       | 192469                         | (G/A)       |
| 30535       | CadSNP6130     | <i>Desi</i>      | Ca_Desig_Scaffold00077       | 201291                         | (G/A)       |
| 30536       | CadSNP6131     | <i>Desi</i>      | Ca_Desig_Scaffold00077       | 201300                         | (T/A)       |
| 30537       | CadSNP6132     | <i>Desi</i>      | Ca_Desig_Scaffold00077       | 206725                         | (C/T)       |
| 30538       | CadSNP6133     | <i>Desi</i>      | Ca_Desig_Scaffold00077       | 213496                         | (G/C)       |
| 30539       | CadSNP6134     | <i>Desi</i>      | Ca_Desig_Scaffold00077       | 213490                         | (A/G)       |
| 30540       | CadSNP6135     | <i>Desi</i>      | Ca_Desig_Scaffold00077       | 213502                         | (A/G)       |
| 30541       | CadSNP6136     | <i>Desi</i>      | Ca_Desig_Scaffold00077       | 243484                         | (G/T)       |
| 30542       | CadSNP6137     | <i>Desi</i>      | Ca_Desig_Scaffold00077       | 325246                         | (T/A)       |
| 30543       | CadSNP6138     | <i>Desi</i>      | Ca_Desig_Scaffold00077       | 325187                         | (C/T)       |
| 30544       | CadSNP6139     | <i>Desi</i>      | Ca_Desig_Scaffold00077       | 337295                         | (A/C)       |
| 30545       | CadSNP6140     | <i>Desi</i>      | Ca_Desig_Scaffold00077       | 337338                         | (C/T)       |
| 30546       | CadSNP6141     | <i>Desi</i>      | Ca_Desig_Scaffold00077       | 337351                         | (T/C)       |
| 30547       | CadSNP6142     | <i>Desi</i>      | Ca_Desig_Scaffold00078       | 260820                         | (C/A)       |
| 30548       | CadSNP6143     | <i>Desi</i>      | Ca_Desig_Scaffold00079       | 94944                          | (C/T)       |
| 30549       | CadSNP6144     | <i>Desi</i>      | Ca_Desig_Scaffold00079       | 94965                          | (G/T)       |
| 30550       | CadSNP6145     | <i>Desi</i>      | Ca_Desig_Scaffold00079       | 229258                         | (T/C)       |
| 30551       | CadSNP6146     | <i>Desi</i>      | Ca_Desig_Scaffold00079       | 240819                         | (G/A)       |

| <b>S.N.</b> | <b>SNP IDs</b> | <b>Cultivars</b> | <b>Chromosomes/scaffolds</b> | <b>Physical positions (bp)</b> | <b>SNPs</b> |
|-------------|----------------|------------------|------------------------------|--------------------------------|-------------|
| 30552       | CadSNP6147     | <i>Desi</i>      | Ca_Desig_Scaffold00079       | 241954                         | (C/G)       |
| 30553       | CadSNP6148     | <i>Desi</i>      | Ca_Desig_Scaffold00079       | 314378                         | (A/G)       |
| 30554       | CadSNP6149     | <i>Desi</i>      | Ca_Desig_Scaffold00079       | 327909                         | (A/T)       |
| 30555       | CadSNP6150     | <i>Desi</i>      | Ca_Desig_Scaffold00079       | 328145                         | (A/C)       |
| 30556       | CadSNP6151     | <i>Desi</i>      | Ca_Desig_Scaffold00079       | 328740                         | (C/G)       |
| 30557       | CadSNP6152     | <i>Desi</i>      | Ca_Desig_Scaffold00079       | 341939                         | (C/T)       |
| 30558       | CadSNP6153     | <i>Desi</i>      | Ca_Desig_Scaffold00079       | 352507                         | (T/C)       |
| 30559       | CadSNP6154     | <i>Desi</i>      | Ca_Desig_Scaffold00079       | 363044                         | (C/T)       |
| 30560       | CadSNP6155     | <i>Desi</i>      | Ca_Desig_Scaffold00079       | 373906                         | (G/A)       |
| 30561       | CadSNP6156     | <i>Desi</i>      | Ca_Desig_Scaffold00089       | 131192                         | (G/C)       |
| 30562       | CadSNP6157     | <i>Desi</i>      | Ca_Desig_Scaffold00089       | 147452                         | (T/C)       |
| 30563       | CadSNP6158     | <i>Desi</i>      | Ca_Desig_Scaffold00089       | 147486                         | (G/T)       |
| 30564       | CadSNP6159     | <i>Desi</i>      | Ca_Desig_Scaffold00089       | 147496                         | (G/C)       |
| 30565       | CadSNP6160     | <i>Desi</i>      | Ca_Desig_Scaffold00089       | 235945                         | (G/A)       |
| 30566       | CadSNP6161     | <i>Desi</i>      | Ca_Desig_Scaffold00089       | 289315                         | (T/C)       |
| 30567       | CadSNP6162     | <i>Desi</i>      | Ca_Desig_Scaffold00089       | 289355                         | (G/A)       |
| 30568       | CadSNP6163     | <i>Desi</i>      | Ca_Desig_Scaffold00089       | 291709                         | (A/G)       |
| 30569       | CadSNP6164     | <i>Desi</i>      | Ca_Desig_Scaffold00089       | 291736                         | (C/A)       |
| 30570       | CadSNP6165     | <i>Desi</i>      | Ca_Desig_Scaffold00089       | 291803                         | (T/G)       |
| 30571       | CadSNP6166     | <i>Desi</i>      | Ca_Desig_Scaffold00089       | 292570                         | (A/G)       |
| 30572       | CadSNP6167     | <i>Desi</i>      | Ca_Desig_Scaffold00089       | 296272                         | (C/G)       |
| 30573       | CadSNP6168     | <i>Desi</i>      | Ca_Desig_Scaffold00089       | 296311                         | (A/G)       |
| 30574       | CadSNP6169     | <i>Desi</i>      | Ca_Desig_Scaffold00089       | 296307                         | (G/A)       |
| 30575       | CadSNP6170     | <i>Desi</i>      | Ca_Desig_Scaffold00089       | 296346                         | (A/G)       |
| 30576       | CadSNP6171     | <i>Desi</i>      | Ca_Desig_Scaffold00089       | 296374                         | (A/G)       |
| 30577       | CadSNP6172     | <i>Desi</i>      | Ca_Desig_Scaffold00093       | 23627                          | (C/T)       |
| 30578       | CadSNP6173     | <i>Desi</i>      | Ca_Desig_Scaffold00093       | 34934                          | (A/T)       |
| 30579       | CadSNP6174     | <i>Desi</i>      | Ca_Desig_Scaffold00093       | 38349                          | (G/A)       |
| 30580       | CadSNP6175     | <i>Desi</i>      | Ca_Desig_Scaffold00093       | 38379                          | (A/G)       |
| 30581       | CadSNP6176     | <i>Desi</i>      | Ca_Desig_Scaffold00093       | 65926                          | (G/A)       |
| 30582       | CadSNP6177     | <i>Desi</i>      | Ca_Desig_Scaffold00093       | 65872                          | (C/T)       |
| 30583       | CadSNP6178     | <i>Desi</i>      | Ca_Desig_Scaffold00093       | 65849                          | (A/G)       |
| 30584       | CadSNP6179     | <i>Desi</i>      | Ca_Desig_Scaffold00093       | 65934                          | (A/C)       |
| 30585       | CadSNP6180     | <i>Desi</i>      | Ca_Desig_Scaffold00093       | 155942                         | (T/C)       |
| 30586       | CadSNP6181     | <i>Desi</i>      | Ca_Desig_Scaffold00093       | 157340                         | (G/C)       |
| 30587       | CadSNP6182     | <i>Desi</i>      | Ca_Desig_Scaffold00093       | 177263                         | (C/T)       |
| 30588       | CadSNP6183     | <i>Desi</i>      | Ca_Desig_Scaffold00093       | 177319                         | (A/G)       |
| 30589       | CadSNP6184     | <i>Desi</i>      | Ca_Desig_Scaffold00093       | 177314                         | (G/C)       |

| <b>S.N.</b> | <b>SNP IDs</b> | <b>Cultivars</b> | <b>Chromosomes/scaffolds</b> | <b>Physical positions (bp)</b> | <b>SNPs</b> |
|-------------|----------------|------------------|------------------------------|--------------------------------|-------------|
| 30590       | CadSNP6185     | <i>Desi</i>      | Ca_Desig_Scaffold00093       | 232769                         | (C/T)       |
| 30591       | CadSNP6186     | <i>Desi</i>      | Ca_Desig_Scaffold00093       | 283066                         | (A/G)       |
| 30592       | CadSNP6187     | <i>Desi</i>      | Ca_Desig_Scaffold00093       | 283082                         | (A/T)       |
| 30593       | CadSNP6188     | <i>Desi</i>      | Ca_Desig_Scaffold00093       | 283134                         | (G/A)       |
| 30594       | CadSNP6189     | <i>Desi</i>      | Ca_Desig_Scaffold00105       | 25166                          | (T/A)       |
| 30595       | CadSNP6190     | <i>Desi</i>      | Ca_Desig_Scaffold00105       | 34509                          | (C/T)       |
| 30596       | CadSNP6191     | <i>Desi</i>      | Ca_Desig_Scaffold00105       | 34545                          | (A/G)       |
| 30597       | CadSNP6192     | <i>Desi</i>      | Ca_Desig_Scaffold00105       | 34678                          | (G/A)       |
| 30598       | CadSNP6193     | <i>Desi</i>      | Ca_Desig_Scaffold00105       | 34610                          | (G/A)       |
| 30599       | CadSNP6194     | <i>Desi</i>      | Ca_Desig_Scaffold00105       | 69821                          | (G/T)       |
| 30600       | CadSNP6195     | <i>Desi</i>      | Ca_Desig_Scaffold00105       | 69897                          | (A/G)       |
| 30601       | CadSNP6196     | <i>Desi</i>      | Ca_Desig_Scaffold00105       | 108156                         | (T/C)       |
| 30602       | CadSNP6197     | <i>Desi</i>      | Ca_Desig_Scaffold00105       | 109060                         | (A/G)       |
| 30603       | CadSNP6198     | <i>Desi</i>      | Ca_Desig_Scaffold00105       | 109201                         | (C/T)       |
| 30604       | CadSNP6199     | <i>Desi</i>      | Ca_Desig_Scaffold00105       | 109359                         | (T/C)       |
| 30605       | CadSNP6200     | <i>Desi</i>      | Ca_Desig_Scaffold00105       | 141575                         | (T/G)       |
| 30606       | CadSNP6201     | <i>Desi</i>      | Ca_Desig_Scaffold00105       | 205937                         | (G/T)       |
| 30607       | CadSNP6202     | <i>Desi</i>      | Ca_Desig_Scaffold00105       | 205959                         | (C/G)       |
| 30608       | CadSNP6203     | <i>Desi</i>      | Ca_Desig_Scaffold00105       | 271514                         | (A/G)       |
| 30609       | CadSNP6204     | <i>Desi</i>      | Ca_Desig_Scaffold00105       | 274026                         | (G/T)       |
| 30610       | CadSNP6205     | <i>Desi</i>      | Ca_Desig_Scaffold00105       | 275085                         | (A/G)       |
| 30611       | CadSNP6206     | <i>Desi</i>      | Ca_Desig_Scaffold00105       | 296433                         | (A/G)       |
| 30612       | CadSNP6207     | <i>Desi</i>      | Ca_Desig_Scaffold00105       | 314911                         | (G/A)       |
| 30613       | CadSNP6208     | <i>Desi</i>      | Ca_Desig_Scaffold00105       | 314951                         | (A/G)       |
| 30614       | CadSNP6209     | <i>Desi</i>      | Ca_Desig_Scaffold00105       | 316430                         | (G/T)       |
| 30615       | CadSNP6210     | <i>Desi</i>      | Ca_Desig_Scaffold00105       | 316436                         | (A/C)       |
| 30616       | CadSNP6211     | <i>Desi</i>      | Ca_Desig_Scaffold00105       | 318163                         | (G/T)       |
| 30617       | CadSNP6212     | <i>Desi</i>      | Ca_Desig_Scaffold00105       | 318254                         | (A/G)       |
| 30618       | CadSNP6213     | <i>Desi</i>      | Ca_Desig_Scaffold00110       | 31583                          | (T/C)       |
| 30619       | CadSNP6214     | <i>Desi</i>      | Ca_Desig_Scaffold00110       | 31603                          | (G/A)       |
| 30620       | CadSNP6215     | <i>Desi</i>      | Ca_Desig_Scaffold00110       | 138269                         | (A/G)       |
| 30621       | CadSNP6216     | <i>Desi</i>      | Ca_Desig_Scaffold00110       | 186079                         | (T/A)       |
| 30622       | CadSNP6217     | <i>Desi</i>      | Ca_Desig_Scaffold00110       | 209208                         | (C/T)       |
| 30623       | CadSNP6218     | <i>Desi</i>      | Ca_Desig_Scaffold00110       | 210897                         | (A/G)       |
| 30624       | CadSNP6219     | <i>Desi</i>      | Ca_Desig_Scaffold00110       | 226009                         | (G/T)       |
| 30625       | CadSNP6220     | <i>Desi</i>      | Ca_Desig_Scaffold00110       | 247301                         | (G/T)       |
| 30626       | CadSNP6221     | <i>Desi</i>      | Ca_Desig_Scaffold00110       | 247326                         | (A/G)       |
| 30627       | CadSNP6222     | <i>Desi</i>      | Ca_Desig_Scaffold00110       | 247455                         | (C/T)       |



| <b>S.N.</b> | <b>SNP IDs</b> | <b>Cultivars</b> | <b>Chromosomes/scaffolds</b> | <b>Physical positions (bp)</b> | <b>SNPs</b> |
|-------------|----------------|------------------|------------------------------|--------------------------------|-------------|
| 30628       | CadSNP6223     | <i>Desi</i>      | Ca_Desig_Scaffold00110       | 282223                         | (C/T)       |
| 30629       | CadSNP6224     | <i>Desi</i>      | Ca_Desig_Scaffold00110       | 282463                         | (T/C)       |
| 30630       | CadSNP6225     | <i>Desi</i>      | Ca_Desig_Scaffold00113       | 65093                          | (T/G)       |
| 30631       | CadSNP6226     | <i>Desi</i>      | Ca_Desig_Scaffold00113       | 112847                         | (G/A)       |
| 30632       | CadSNP6227     | <i>Desi</i>      | Ca_Desig_Scaffold00113       | 123793                         | (C/T)       |
| 30633       | CadSNP6228     | <i>Desi</i>      | Ca_Desig_Scaffold00113       | 123846                         | (T/C)       |
| 30634       | CadSNP6229     | <i>Desi</i>      | Ca_Desig_Scaffold00113       | 123852                         | (T/A)       |
| 30635       | CadSNP6230     | <i>Desi</i>      | Ca_Desig_Scaffold00113       | 123865                         | (G/C)       |
| 30636       | CadSNP6231     | <i>Desi</i>      | Ca_Desig_Scaffold00113       | 123872                         | (G/A)       |
| 30637       | CadSNP6232     | <i>Desi</i>      | Ca_Desig_Scaffold00113       | 140380                         | (T/C)       |
| 30638       | CadSNP6233     | <i>Desi</i>      | Ca_Desig_Scaffold00113       | 154538                         | (T/C)       |
| 30639       | CadSNP6234     | <i>Desi</i>      | Ca_Desig_Scaffold00113       | 204925                         | (T/C)       |
| 30640       | CadSNP6235     | <i>Desi</i>      | Ca_Desig_Scaffold00113       | 206141                         | (T/A)       |
| 30641       | CadSNP6236     | <i>Desi</i>      | Ca_Desig_Scaffold00113       | 206181                         | (T/A)       |
| 30642       | CadSNP6237     | <i>Desi</i>      | Ca_Desig_Scaffold00113       | 206174                         | (A/G)       |
| 30643       | CadSNP6238     | <i>Desi</i>      | Ca_Desig_Scaffold00113       | 206169                         | (A/G)       |
| 30644       | CadSNP6239     | <i>Desi</i>      | Ca_Desig_Scaffold00113       | 206163                         | (T/G)       |
| 30645       | CadSNP6240     | <i>Desi</i>      | Ca_Desig_Scaffold00113       | 230221                         | (T/C)       |
| 30646       | CadSNP6241     | <i>Desi</i>      | Ca_Desig_Scaffold00113       | 254983                         | (A/G)       |
| 30647       | CadSNP6242     | <i>Desi</i>      | Ca_Desig_Scaffold00113       | 254986                         | (T/G)       |
| 30648       | CadSNP6243     | <i>Desi</i>      | Ca_Desig_Scaffold00113       | 255133                         | (G/A)       |
| 30649       | CadSNP6244     | <i>Desi</i>      | Ca_Desig_Scaffold00113       | 255132                         | (T/C)       |
| 30650       | CadSNP6245     | <i>Desi</i>      | Ca_Desig_Scaffold00113       | 257928                         | (G/A)       |
| 30651       | CadSNP6246     | <i>Desi</i>      | Ca_Desig_Scaffold00113       | 257906                         | (G/A)       |
| 30652       | CadSNP6247     | <i>Desi</i>      | Ca_Desig_Scaffold00113       | 260632                         | (G/A)       |
| 30653       | CadSNP6248     | <i>Desi</i>      | Ca_Desig_Scaffold00113       | 292185                         | (T/G)       |
| 30654       | CadSNP6249     | <i>Desi</i>      | Ca_Desig_Scaffold00113       | 292199                         | (A/T)       |
| 30655       | CadSNP6250     | <i>Desi</i>      | Ca_Desig_Scaffold00113       | 292200                         | (T/A)       |
| 30656       | CadSNP6251     | <i>Desi</i>      | Ca_Desig_Scaffold00113       | 292296                         | (T/G)       |
| 30657       | CadSNP6252     | <i>Desi</i>      | Ca_Desig_Scaffold00113       | 292274                         | (C/T)       |
| 30658       | CadSNP6253     | <i>Desi</i>      | Ca_Desig_Scaffold00119       | 80789                          | (C/A)       |
| 30659       | CadSNP6254     | <i>Desi</i>      | Ca_Desig_Scaffold00119       | 196221                         | (G/A)       |
| 30660       | CadSNP6255     | <i>Desi</i>      | Ca_Desig_Scaffold00119       | 196235                         | (A/C)       |
| 30661       | CadSNP6256     | <i>Desi</i>      | Ca_Desig_Scaffold00119       | 197002                         | (C/A)       |
| 30662       | CadSNP6257     | <i>Desi</i>      | Ca_Desig_Scaffold00119       | 212218                         | (T/C)       |
| 30663       | CadSNP6258     | <i>Desi</i>      | Ca_Desig_Scaffold00119       | 281181                         | (T/G)       |
| 30664       | CadSNP6259     | <i>Desi</i>      | Ca_Desig_Scaffold00119       | 281265                         | (C/G)       |
| 30665       | CadSNP6260     | <i>Desi</i>      | Ca_Desig_Scaffold00122       | 143484                         | (T/G)       |

| <b>S.N.</b> | <b>SNP IDs</b> | <b>Cultivars</b> | <b>Chromosomes/scaffolds</b> | <b>Physical positions (bp)</b> | <b>SNPs</b> |
|-------------|----------------|------------------|------------------------------|--------------------------------|-------------|
| 30666       | CadSNP6261     | <i>Desi</i>      | Ca_Desig_Scaffold00122       | 161513                         | (A/G)       |
| 30667       | CadSNP6262     | <i>Desi</i>      | Ca_Desig_Scaffold00122       | 161470                         | (T/C)       |
| 30668       | CadSNP6263     | <i>Desi</i>      | Ca_Desig_Scaffold00122       | 209055                         | (T/C)       |
| 30669       | CadSNP6264     | <i>Desi</i>      | Ca_Desig_Scaffold00122       | 291001                         | (T/C)       |
| 30670       | CadSNP6265     | <i>Desi</i>      | Ca_Desig_Scaffold00122       | 290989                         | (C/T)       |
| 30671       | CadSNP6266     | <i>Desi</i>      | Ca_Desig_Scaffold00122       | 290984                         | (G/A)       |
| 30672       | CadSNP6267     | <i>Desi</i>      | Ca_Desig_Scaffold00122       | 291866                         | (T/C)       |
| 30673       | CadSNP6268     | <i>Desi</i>      | Ca_Desig_Scaffold00122       | 291870                         | (C/T)       |
| 30674       | CadSNP6269     | <i>Desi</i>      | Ca_Desig_Scaffold00122       | 291887                         | (G/C)       |
| 30675       | CadSNP6270     | <i>Desi</i>      | Ca_Desig_Scaffold00122       | 291891                         | (C/A)       |
| 30676       | CadSNP6271     | <i>Desi</i>      | Ca_Desig_Scaffold00122       | 291914                         | (C/T)       |
| 30677       | CadSNP6272     | <i>Desi</i>      | Ca_Desig_Scaffold00122       | 291917                         | (A/G)       |
| 30678       | CadSNP6273     | <i>Desi</i>      | Ca_Desig_Scaffold00122       | 291919                         | (A/G)       |
| 30679       | CadSNP6274     | <i>Desi</i>      | Ca_Desig_Scaffold00122       | 291929                         | (A/G)       |
| 30680       | CadSNP6275     | <i>Desi</i>      | Ca_Desig_Scaffold00122       | 291934                         | (A/T)       |
| 30681       | CadSNP6276     | <i>Desi</i>      | Ca_Desig_Scaffold00122       | 294611                         | (T/C)       |
| 30682       | CadSNP6277     | <i>Desi</i>      | Ca_Desig_Scaffold00126       | 26211                          | (C/T)       |
| 30683       | CadSNP6278     | <i>Desi</i>      | Ca_Desig_Scaffold00126       | 26232                          | (A/G)       |
| 30684       | CadSNP6279     | <i>Desi</i>      | Ca_Desig_Scaffold00126       | 26254                          | (G/C)       |
| 30685       | CadSNP6280     | <i>Desi</i>      | Ca_Desig_Scaffold00126       | 90665                          | (C/T)       |
| 30686       | CadSNP6281     | <i>Desi</i>      | Ca_Desig_Scaffold00126       | 91094                          | (A/C)       |
| 30687       | CadSNP6282     | <i>Desi</i>      | Ca_Desig_Scaffold00126       | 91095                          | (G/T)       |
| 30688       | CadSNP6283     | <i>Desi</i>      | Ca_Desig_Scaffold00126       | 91222                          | (C/A)       |
| 30689       | CadSNP6284     | <i>Desi</i>      | Ca_Desig_Scaffold00126       | 163844                         | (G/A)       |
| 30690       | CadSNP6285     | <i>Desi</i>      | Ca_Desig_Scaffold00126       | 224780                         | (A/G)       |
| 30691       | CadSNP6286     | <i>Desi</i>      | Ca_Desig_Scaffold00126       | 224738                         | (A/G)       |
| 30692       | CadSNP6287     | <i>Desi</i>      | Ca_Desig_Scaffold00126       | 224737                         | (C/G)       |
| 30693       | CadSNP6288     | <i>Desi</i>      | Ca_Desig_Scaffold00126       | 224735                         | (A/T)       |
| 30694       | CadSNP6289     | <i>Desi</i>      | Ca_Desig_Scaffold00126       | 224732                         | (A/T)       |
| 30695       | CadSNP6290     | <i>Desi</i>      | Ca_Desig_Scaffold00126       | 224729                         | (G/A)       |
| 30696       | CadSNP6291     | <i>Desi</i>      | Ca_Desig_Scaffold00126       | 224726                         | (C/T)       |
| 30697       | CadSNP6292     | <i>Desi</i>      | Ca_Desig_Scaffold00126       | 224717                         | (T/A)       |
| 30698       | CadSNP6293     | <i>Desi</i>      | Ca_Desig_Scaffold00126       | 224762                         | (T/C)       |
| 30699       | CadSNP6294     | <i>Desi</i>      | Ca_Desig_Scaffold00126       | 224765                         | (A/T)       |
| 30700       | CadSNP6295     | <i>Desi</i>      | Ca_Desig_Scaffold00126       | 224767                         | (G/T)       |
| 30701       | CadSNP6296     | <i>Desi</i>      | Ca_Desig_Scaffold00126       | 224770                         | (G/T)       |
| 30702       | CadSNP6297     | <i>Desi</i>      | Ca_Desig_Scaffold00126       | 224771                         | (A/T)       |
| 30703       | CadSNP6298     | <i>Desi</i>      | Ca_Desig_Scaffold00126       | 224773                         | (C/T)       |

| <b>S.N.</b> | <b>SNP IDs</b> | <b>Cultivars</b> | <b>Chromosomes/scaffolds</b> | <b>Physical positions (bp)</b> | <b>SNPs</b> |
|-------------|----------------|------------------|------------------------------|--------------------------------|-------------|
| 30704       | CadSNP6299     | <i>Desi</i>      | Ca_Desig_Scaffold00126       | 224774                         | (C/T)       |
| 30705       | CadSNP6300     | <i>Desi</i>      | Ca_Desig_Scaffold00126       | 224776                         | (A/G)       |
| 30706       | CadSNP6301     | <i>Desi</i>      | Ca_Desig_Scaffold00126       | 224789                         | (G/T)       |
| 30707       | CadSNP6302     | <i>Desi</i>      | Ca_Desig_Scaffold00126       | 224794                         | (C/A)       |
| 30708       | CadSNP6303     | <i>Desi</i>      | Ca_Desig_Scaffold00126       | 281754                         | (T/C)       |
| 30709       | CadSNP6304     | <i>Desi</i>      | Ca_Desig_Scaffold00126       | 281759                         | (C/A)       |
| 30710       | CadSNP6305     | <i>Desi</i>      | Ca_Desig_Scaffold00126       | 281764                         | (C/T)       |
| 30711       | CadSNP6306     | <i>Desi</i>      | Ca_Desig_Scaffold00126       | 281774                         | (C/T)       |
| 30712       | CadSNP6307     | <i>Desi</i>      | Ca_Desig_Scaffold00126       | 281782                         | (C/T)       |
| 30713       | CadSNP6308     | <i>Desi</i>      | Ca_Desig_Scaffold00126       | 281791                         | (G/C)       |
| 30714       | CadSNP6309     | <i>Desi</i>      | Ca_Desig_Scaffold00126       | 281792                         | (A/T)       |
| 30715       | CadSNP6310     | <i>Desi</i>      | Ca_Desig_Scaffold00126       | 281887                         | (A/T)       |
| 30716       | CadSNP6311     | <i>Desi</i>      | Ca_Desig_Scaffold00126       | 281873                         | (G/A)       |
| 30717       | CadSNP6312     | <i>Desi</i>      | Ca_Desig_Scaffold00126       | 281856                         | (G/C)       |
| 30718       | CadSNP6313     | <i>Desi</i>      | Ca_Desig_Scaffold00126       | 282106                         | (C/G)       |
| 30719       | CadSNP6314     | <i>Desi</i>      | Ca_Desig_Scaffold00126       | 282153                         | (T/C)       |
| 30720       | CadSNP6315     | <i>Desi</i>      | Ca_Desig_Scaffold00126       | 282271                         | (A/G)       |
| 30721       | CadSNP6316     | <i>Desi</i>      | Ca_Desig_Scaffold00126       | 282254                         | (A/G)       |
| 30722       | CadSNP6317     | <i>Desi</i>      | Ca_Desig_Scaffold00126       | 282248                         | (G/A)       |
| 30723       | CadSNP6318     | <i>Desi</i>      | Ca_Desig_Scaffold00126       | 284041                         | (A/T)       |
| 30724       | CadSNP6319     | <i>Desi</i>      | Ca_Desig_Scaffold00126       | 284044                         | (T/C)       |
| 30725       | CadSNP6320     | <i>Desi</i>      | Ca_Desig_Scaffold00126       | 284053                         | (C/T)       |
| 30726       | CadSNP6321     | <i>Desi</i>      | Ca_Desig_Scaffold00126       | 284062                         | (T/G)       |
| 30727       | CadSNP6322     | <i>Desi</i>      | Ca_Desig_Scaffold00126       | 284063                         | (G/T)       |
| 30728       | CadSNP6323     | <i>Desi</i>      | Ca_Desig_Scaffold00126       | 284070                         | (T/C)       |
| 30729       | CadSNP6324     | <i>Desi</i>      | Ca_Desig_Scaffold00126       | 284071                         | (A/C)       |
| 30730       | CadSNP6325     | <i>Desi</i>      | Ca_Desig_Scaffold00126       | 284084                         | (T/C)       |
| 30731       | CadSNP6326     | <i>Desi</i>      | Ca_Desig_Scaffold00126       | 284095                         | (C/A)       |
| 30732       | CadSNP6327     | <i>Desi</i>      | Ca_Desig_Scaffold00126       | 284119                         | (G/T)       |
| 30733       | CadSNP6328     | <i>Desi</i>      | Ca_Desig_Scaffold00126       | 284154                         | (A/T)       |
| 30734       | CadSNP6329     | <i>Desi</i>      | Ca_Desig_Scaffold00126       | 284145                         | (A/T)       |
| 30735       | CadSNP6330     | <i>Desi</i>      | Ca_Desig_Scaffold00126       | 284144                         | (T/C)       |
| 30736       | CadSNP6331     | <i>Desi</i>      | Ca_Desig_Scaffold00126       | 284113                         | (C/T)       |
| 30737       | CadSNP6332     | <i>Desi</i>      | Ca_Desig_Scaffold00126       | 284590                         | (G/C)       |
| 30738       | CadSNP6333     | <i>Desi</i>      | Ca_Desig_Scaffold00126       | 284579                         | (A/T)       |
| 30739       | CadSNP6334     | <i>Desi</i>      | Ca_Desig_Scaffold00126       | 284538                         | (A/G)       |
| 30740       | CadSNP6335     | <i>Desi</i>      | Ca_Desig_Scaffold00126       | 284532                         | (C/G)       |
| 30741       | CadSNP6336     | <i>Desi</i>      | Ca_Desig_Scaffold00126       | 284526                         | (T/G)       |

| <b>S.N.</b> | <b>SNP IDs</b> | <b>Cultivars</b> | <b>Chromosomes/scaffolds</b> | <b>Physical positions (bp)</b> | <b>SNPs</b> |
|-------------|----------------|------------------|------------------------------|--------------------------------|-------------|
| 30742       | CadSNP6337     | <i>Desi</i>      | Ca_Desig_Scaffold00126       | 284521                         | (C/G)       |
| 30743       | CadSNP6338     | <i>Desi</i>      | Ca_Desig_Scaffold00126       | 300818                         | (C/T)       |
| 30744       | CadSNP6339     | <i>Desi</i>      | Ca_Desig_Scaffold00143       | 45768                          | (G/A)       |
| 30745       | CadSNP6340     | <i>Desi</i>      | Ca_Desig_Scaffold00143       | 45763                          | (C/A)       |
| 30746       | CadSNP6341     | <i>Desi</i>      | Ca_Desig_Scaffold00143       | 45758                          | (T/C)       |
| 30747       | CadSNP6342     | <i>Desi</i>      | Ca_Desig_Scaffold00143       | 45745                          | (T/C)       |
| 30748       | CadSNP6343     | <i>Desi</i>      | Ca_Desig_Scaffold00143       | 123133                         | (C/T)       |
| 30749       | CadSNP6344     | <i>Desi</i>      | Ca_Desig_Scaffold00143       | 130642                         | (G/A)       |
| 30750       | CadSNP6345     | <i>Desi</i>      | Ca_Desig_Scaffold00143       | 167080                         | (G/T)       |
| 30751       | CadSNP6346     | <i>Desi</i>      | Ca_Desig_Scaffold00143       | 208043                         | (G/A)       |
| 30752       | CadSNP6347     | <i>Desi</i>      | Ca_Desig_Scaffold00143       | 208021                         | (A/C)       |
| 30753       | CadSNP6348     | <i>Desi</i>      | Ca_Desig_Scaffold00143       | 229479                         | (T/G)       |
| 30754       | CadSNP6349     | <i>Desi</i>      | Ca_Desig_Scaffold00143       | 229646                         | (G/A)       |
| 30755       | CadSNP6350     | <i>Desi</i>      | Ca_Desig_Scaffold00156       | 35178                          | (T/C)       |
| 30756       | CadSNP6351     | <i>Desi</i>      | Ca_Desig_Scaffold00156       | 180457                         | (T/C)       |
| 30757       | CadSNP6352     | <i>Desi</i>      | Ca_Desig_Scaffold00156       | 189928                         | (C/A)       |
| 30758       | CadSNP6353     | <i>Desi</i>      | Ca_Desig_Scaffold00156       | 189929                         | (T/G)       |
| 30759       | CadSNP6354     | <i>Desi</i>      | Ca_Desig_Scaffold00156       | 190974                         | (A/G)       |
| 30760       | CadSNP6355     | <i>Desi</i>      | Ca_Desig_Scaffold00156       | 191032                         | (G/A)       |
| 30761       | CadSNP6356     | <i>Desi</i>      | Ca_Desig_Scaffold00156       | 276233                         | (T/A)       |
| 30762       | CadSNP6357     | <i>Desi</i>      | Ca_Desig_Scaffold00156       | 276187                         | (A/C)       |
| 30763       | CadSNP6358     | <i>Desi</i>      | Ca_Desig_Scaffold00156       | 278823                         | (C/T)       |
| 30764       | CadSNP6359     | <i>Desi</i>      | Ca_Desig_Scaffold00157       | 34427                          | (T/C)       |
| 30765       | CadSNP6360     | <i>Desi</i>      | Ca_Desig_Scaffold00157       | 34611                          | (G/A)       |
| 30766       | CadSNP6361     | <i>Desi</i>      | Ca_Desig_Scaffold00157       | 55197                          | (T/C)       |
| 30767       | CadSNP6362     | <i>Desi</i>      | Ca_Desig_Scaffold00157       | 103426                         | (C/G)       |
| 30768       | CadSNP6363     | <i>Desi</i>      | Ca_Desig_Scaffold00157       | 103436                         | (A/G)       |
| 30769       | CadSNP6364     | <i>Desi</i>      | Ca_Desig_Scaffold00157       | 108965                         | (A/C)       |
| 30770       | CadSNP6365     | <i>Desi</i>      | Ca_Desig_Scaffold00157       | 108963                         | (C/G)       |
| 30771       | CadSNP6366     | <i>Desi</i>      | Ca_Desig_Scaffold00157       | 110848                         | (G/A)       |
| 30772       | CadSNP6367     | <i>Desi</i>      | Ca_Desig_Scaffold00157       | 110844                         | (G/C)       |
| 30773       | CadSNP6368     | <i>Desi</i>      | Ca_Desig_Scaffold00157       | 112334                         | (A/G)       |
| 30774       | CadSNP6369     | <i>Desi</i>      | Ca_Desig_Scaffold00157       | 112338                         | (G/C)       |
| 30775       | CadSNP6370     | <i>Desi</i>      | Ca_Desig_Scaffold00157       | 112345                         | (A/G)       |
| 30776       | CadSNP6371     | <i>Desi</i>      | Ca_Desig_Scaffold00157       | 153618                         | (G/T)       |
| 30777       | CadSNP6372     | <i>Desi</i>      | Ca_Desig_Scaffold00157       | 153639                         | (A/G)       |
| 30778       | CadSNP6373     | <i>Desi</i>      | Ca_Desig_Scaffold00157       | 165481                         | (C/G)       |
| 30779       | CadSNP6374     | <i>Desi</i>      | Ca_Desig_Scaffold00157       | 176973                         | (C/G)       |

| <b>S.N.</b> | <b>SNP IDs</b> | <b>Cultivars</b> | <b>Chromosomes/scaffolds</b> | <b>Physical positions (bp)</b> | <b>SNPs</b> |
|-------------|----------------|------------------|------------------------------|--------------------------------|-------------|
| 30780       | CadSNP6375     | <i>Desi</i>      | Ca_Desig_Scaffold00157       | 177005                         | (G/C)       |
| 30781       | CadSNP6376     | <i>Desi</i>      | Ca_Desig_Scaffold00157       | 177355                         | (A/G)       |
| 30782       | CadSNP6377     | <i>Desi</i>      | Ca_Desig_Scaffold00157       | 177423                         | (G/T)       |
| 30783       | CadSNP6378     | <i>Desi</i>      | Ca_Desig_Scaffold00157       | 181918                         | (A/T)       |
| 30784       | CadSNP6379     | <i>Desi</i>      | Ca_Desig_Scaffold00157       | 181989                         | (C/A)       |
| 30785       | CadSNP6380     | <i>Desi</i>      | Ca_Desig_Scaffold00157       | 276548                         | (A/C)       |
| 30786       | CadSNP6381     | <i>Desi</i>      | Ca_Desig_Scaffold00158       | 28882                          | (A/C)       |
| 30787       | CadSNP6382     | <i>Desi</i>      | Ca_Desig_Scaffold00158       | 28876                          | (G/A)       |
| 30788       | CadSNP6383     | <i>Desi</i>      | Ca_Desig_Scaffold00158       | 28873                          | (T/C)       |
| 30789       | CadSNP6384     | <i>Desi</i>      | Ca_Desig_Scaffold00158       | 28871                          | (T/A)       |
| 30790       | CadSNP6385     | <i>Desi</i>      | Ca_Desig_Scaffold00158       | 28868                          | (T/G)       |
| 30791       | CadSNP6386     | <i>Desi</i>      | Ca_Desig_Scaffold00158       | 28845                          | (G/C)       |
| 30792       | CadSNP6387     | <i>Desi</i>      | Ca_Desig_Scaffold00158       | 34623                          | (T/A)       |
| 30793       | CadSNP6388     | <i>Desi</i>      | Ca_Desig_Scaffold00158       | 36658                          | (T/C)       |
| 30794       | CadSNP6389     | <i>Desi</i>      | Ca_Desig_Scaffold00158       | 42883                          | (A/G)       |
| 30795       | CadSNP6390     | <i>Desi</i>      | Ca_Desig_Scaffold00158       | 90025                          | (C/T)       |
| 30796       | CadSNP6391     | <i>Desi</i>      | Ca_Desig_Scaffold00158       | 121408                         | (T/C)       |
| 30797       | CadSNP6392     | <i>Desi</i>      | Ca_Desig_Scaffold00158       | 121424                         | (A/G)       |
| 30798       | CadSNP6393     | <i>Desi</i>      | Ca_Desig_Scaffold00158       | 121538                         | (A/T)       |
| 30799       | CadSNP6394     | <i>Desi</i>      | Ca_Desig_Scaffold00158       | 121478                         | (C/G)       |
| 30800       | CadSNP6395     | <i>Desi</i>      | Ca_Desig_Scaffold00158       | 121477                         | (A/C)       |
| 30801       | CadSNP6396     | <i>Desi</i>      | Ca_Desig_Scaffold00158       | 121474                         | (C/T)       |
| 30802       | CadSNP6397     | <i>Desi</i>      | Ca_Desig_Scaffold00158       | 121471                         | (G/A)       |
| 30803       | CadSNP6398     | <i>Desi</i>      | Ca_Desig_Scaffold00158       | 221533                         | (G/A)       |
| 30804       | CadSNP6399     | <i>Desi</i>      | Ca_Desig_Scaffold00158       | 231918                         | (T/G)       |
| 30805       | CadSNP6400     | <i>Desi</i>      | Ca_Desig_Scaffold00158       | 253852                         | (G/T)       |
| 30806       | CadSNP6401     | <i>Desi</i>      | Ca_Desig_Scaffold00158       | 253864                         | (A/G)       |
| 30807       | CadSNP6402     | <i>Desi</i>      | Ca_Desig_Scaffold00158       | 253869                         | (C/T)       |
| 30808       | CadSNP6403     | <i>Desi</i>      | Ca_Desig_Scaffold00158       | 253887                         | (C/T)       |
| 30809       | CadSNP6404     | <i>Desi</i>      | Ca_Desig_Scaffold00158       | 261519                         | (G/A)       |
| 30810       | CadSNP6405     | <i>Desi</i>      | Ca_Desig_Scaffold00158       | 264970                         | (T/G)       |
| 30811       | CadSNP6406     | <i>Desi</i>      | Ca_Desig_Scaffold00159       | 957                            | (C/T)       |
| 30812       | CadSNP6407     | <i>Desi</i>      | Ca_Desig_Scaffold00159       | 34335                          | (G/A)       |
| 30813       | CadSNP6408     | <i>Desi</i>      | Ca_Desig_Scaffold00159       | 81934                          | (G/A)       |
| 30814       | CadSNP6409     | <i>Desi</i>      | Ca_Desig_Scaffold00159       | 90294                          | (C/T)       |
| 30815       | CadSNP6410     | <i>Desi</i>      | Ca_Desig_Scaffold00159       | 90295                          | (A/T)       |
| 30816       | CadSNP6411     | <i>Desi</i>      | Ca_Desig_Scaffold00159       | 92340                          | (A/T)       |
| 30817       | CadSNP6412     | <i>Desi</i>      | Ca_Desig_Scaffold00159       | 92339                          | (T/A)       |

| <b>S.N.</b> | <b>SNP IDs</b> | <b>Cultivars</b> | <b>Chromosomes/scaffolds</b> | <b>Physical positions (bp)</b> | <b>SNPs</b> |
|-------------|----------------|------------------|------------------------------|--------------------------------|-------------|
| 30818       | CadSNP6413     | <i>Desi</i>      | Ca_Desig_Scaffold00159       | 94279                          | (T/A)       |
| 30819       | CadSNP6414     | <i>Desi</i>      | Ca_Desig_Scaffold00159       | 137438                         | (T/C)       |
| 30820       | CadSNP6415     | <i>Desi</i>      | Ca_Desig_Scaffold00159       | 141885                         | (C/T)       |
| 30821       | CadSNP6416     | <i>Desi</i>      | Ca_Desig_Scaffold00159       | 143308                         | (A/G)       |
| 30822       | CadSNP6417     | <i>Desi</i>      | Ca_Desig_Scaffold00159       | 143377                         | (A/G)       |
| 30823       | CadSNP6418     | <i>Desi</i>      | Ca_Desig_Scaffold00159       | 164140                         | (G/T)       |
| 30824       | CadSNP6419     | <i>Desi</i>      | Ca_Desig_Scaffold00159       | 164128                         | (A/G)       |
| 30825       | CadSNP6420     | <i>Desi</i>      | Ca_Desig_Scaffold00159       | 164099                         | (A/C)       |
| 30826       | CadSNP6421     | <i>Desi</i>      | Ca_Desig_Scaffold00159       | 186208                         | (T/C)       |
| 30827       | CadSNP6422     | <i>Desi</i>      | Ca_Desig_Scaffold00159       | 186383                         | (A/C)       |
| 30828       | CadSNP6423     | <i>Desi</i>      | Ca_Desig_Scaffold00159       | 188770                         | (A/G)       |
| 30829       | CadSNP6424     | <i>Desi</i>      | Ca_Desig_Scaffold00159       | 188788                         | (T/C)       |
| 30830       | CadSNP6425     | <i>Desi</i>      | Ca_Desig_Scaffold00159       | 188800                         | (C/T)       |
| 30831       | CadSNP6426     | <i>Desi</i>      | Ca_Desig_Scaffold00159       | 191154                         | (C/T)       |
| 30832       | CadSNP6427     | <i>Desi</i>      | Ca_Desig_Scaffold00159       | 197689                         | (C/T)       |
| 30833       | CadSNP6428     | <i>Desi</i>      | Ca_Desig_Scaffold00159       | 220494                         | (A/G)       |
| 30834       | CadSNP6429     | <i>Desi</i>      | Ca_Desig_Scaffold00159       | 220649                         | (T/C)       |
| 30835       | CadSNP6430     | <i>Desi</i>      | Ca_Desig_Scaffold00159       | 263587                         | (A/C)       |
| 30836       | CadSNP6431     | <i>Desi</i>      | Ca_Desig_Scaffold00159       | 263627                         | (C/T)       |
| 30837       | CadSNP6432     | <i>Desi</i>      | Ca_Desig_Scaffold00159       | 263751                         | (T/A)       |
| 30838       | CadSNP6433     | <i>Desi</i>      | Ca_Desig_Scaffold00159       | 263952                         | (A/G)       |
| 30839       | CadSNP6434     | <i>Desi</i>      | Ca_Desig_Scaffold00159       | 263922                         | (A/T)       |
| 30840       | CadSNP6435     | <i>Desi</i>      | Ca_Desig_Scaffold00160       | 42736                          | (T/C)       |
| 30841       | CadSNP6436     | <i>Desi</i>      | Ca_Desig_Scaffold00160       | 44052                          | (C/T)       |
| 30842       | CadSNP6437     | <i>Desi</i>      | Ca_Desig_Scaffold00160       | 51039                          | (A/C)       |
| 30843       | CadSNP6438     | <i>Desi</i>      | Ca_Desig_Scaffold00160       | 51114                          | (G/C)       |
| 30844       | CadSNP6439     | <i>Desi</i>      | Ca_Desig_Scaffold00160       | 65320                          | (T/A)       |
| 30845       | CadSNP6440     | <i>Desi</i>      | Ca_Desig_Scaffold00160       | 65288                          | (A/G)       |
| 30846       | CadSNP6441     | <i>Desi</i>      | Ca_Desig_Scaffold00160       | 207418                         | (T/C)       |
| 30847       | CadSNP6442     | <i>Desi</i>      | Ca_Desig_Scaffold00160       | 207661                         | (G/T)       |
| 30848       | CadSNP6443     | <i>Desi</i>      | Ca_Desig_Scaffold00160       | 207660                         | (A/G)       |
| 30849       | CadSNP6444     | <i>Desi</i>      | Ca_Desig_Scaffold00160       | 207653                         | (T/C)       |
| 30850       | CadSNP6445     | <i>Desi</i>      | Ca_Desig_Scaffold00160       | 207594                         | (T/A)       |
| 30851       | CadSNP6446     | <i>Desi</i>      | Ca_Desig_Scaffold00160       | 207670                         | (A/C)       |
| 30852       | CadSNP6447     | <i>Desi</i>      | Ca_Desig_Scaffold00160       | 207671                         | (G/T)       |
| 30853       | CadSNP6448     | <i>Desi</i>      | Ca_Desig_Scaffold00160       | 219360                         | (T/C)       |
| 30854       | CadSNP6449     | <i>Desi</i>      | Ca_Desig_Scaffold00160       | 235306                         | (T/C)       |
| 30855       | CadSNP6450     | <i>Desi</i>      | Ca_Desig_Scaffold00166       | 149845                         | (C/T)       |

| <b>S.N.</b> | <b>SNP IDs</b> | <b>Cultivars</b> | <b>Chromosomes/scaffolds</b> | <b>Physical positions (bp)</b> | <b>SNPs</b> |
|-------------|----------------|------------------|------------------------------|--------------------------------|-------------|
| 30856       | CadSNP6451     | <i>Desi</i>      | Ca_Desig_Scaffold00167       | 274129                         | (C/T)       |
| 30857       | CadSNP6452     | <i>Desi</i>      | Ca_Desig_Scaffold00167       | 274127                         | (A/C)       |
| 30858       | CadSNP6453     | <i>Desi</i>      | Ca_Desig_Scaffold00173       | 11747                          | (A/C)       |
| 30859       | CadSNP6454     | <i>Desi</i>      | Ca_Desig_Scaffold00173       | 24653                          | (T/C)       |
| 30860       | CadSNP6455     | <i>Desi</i>      | Ca_Desig_Scaffold00173       | 24967                          | (T/C)       |
| 30861       | CadSNP6456     | <i>Desi</i>      | Ca_Desig_Scaffold00173       | 45462                          | (G/T)       |
| 30862       | CadSNP6457     | <i>Desi</i>      | Ca_Desig_Scaffold00173       | 84133                          | (C/T)       |
| 30863       | CadSNP6458     | <i>Desi</i>      | Ca_Desig_Scaffold00173       | 85327                          | (A/T)       |
| 30864       | CadSNP6459     | <i>Desi</i>      | Ca_Desig_Scaffold00173       | 138184                         | (T/A)       |
| 30865       | CadSNP6460     | <i>Desi</i>      | Ca_Desig_Scaffold00173       | 170919                         | (C/A)       |
| 30866       | CadSNP6461     | <i>Desi</i>      | Ca_Desig_Scaffold00173       | 192249                         | (T/C)       |
| 30867       | CadSNP6462     | <i>Desi</i>      | Ca_Desig_Scaffold00173       | 192227                         | (G/C)       |
| 30868       | CadSNP6463     | <i>Desi</i>      | Ca_Desig_Scaffold00173       | 219475                         | (T/A)       |
| 30869       | CadSNP6464     | <i>Desi</i>      | Ca_Desig_Scaffold00185       | 59279                          | (C/T)       |
| 30870       | CadSNP6465     | <i>Desi</i>      | Ca_Desig_Scaffold00185       | 59243                          | (C/T)       |
| 30871       | CadSNP6466     | <i>Desi</i>      | Ca_Desig_Scaffold00185       | 59284                          | (G/C)       |
| 30872       | CadSNP6467     | <i>Desi</i>      | Ca_Desig_Scaffold00185       | 59278                          | (A/G)       |
| 30873       | CadSNP6468     | <i>Desi</i>      | Ca_Desig_Scaffold00185       | 103009                         | (T/G)       |
| 30874       | CadSNP6469     | <i>Desi</i>      | Ca_Desig_Scaffold00185       | 103016                         | (T/G)       |
| 30875       | CadSNP6470     | <i>Desi</i>      | Ca_Desig_Scaffold00185       | 103043                         | (T/G)       |
| 30876       | CadSNP6471     | <i>Desi</i>      | Ca_Desig_Scaffold00185       | 129102                         | (A/G)       |
| 30877       | CadSNP6472     | <i>Desi</i>      | Ca_Desig_Scaffold00185       | 146222                         | (C/T)       |
| 30878       | CadSNP6473     | <i>Desi</i>      | Ca_Desig_Scaffold00185       | 148508                         | (C/T)       |
| 30879       | CadSNP6474     | <i>Desi</i>      | Ca_Desig_Scaffold00185       | 148527                         | (A/G)       |
| 30880       | CadSNP6475     | <i>Desi</i>      | Ca_Desig_Scaffold00185       | 156748                         | (G/T)       |
| 30881       | CadSNP6476     | <i>Desi</i>      | Ca_Desig_Scaffold00185       | 156780                         | (G/C)       |
| 30882       | CadSNP6477     | <i>Desi</i>      | Ca_Desig_Scaffold00185       | 156805                         | (G/C)       |
| 30883       | CadSNP6478     | <i>Desi</i>      | Ca_Desig_Scaffold00185       | 177963                         | (T/C)       |
| 30884       | CadSNP6479     | <i>Desi</i>      | Ca_Desig_Scaffold00185       | 178604                         | (A/G)       |
| 30885       | CadSNP6480     | <i>Desi</i>      | Ca_Desig_Scaffold00185       | 178989                         | (T/G)       |
| 30886       | CadSNP6481     | <i>Desi</i>      | Ca_Desig_Scaffold00185       | 179106                         | (G/A)       |
| 30887       | CadSNP6482     | <i>Desi</i>      | Ca_Desig_Scaffold00185       | 180378                         | (A/T)       |
| 30888       | CadSNP6483     | <i>Desi</i>      | Ca_Desig_Scaffold00185       | 180496                         | (A/G)       |
| 30889       | CadSNP6484     | <i>Desi</i>      | Ca_Desig_Scaffold00185       | 192195                         | (A/T)       |
| 30890       | CadSNP6485     | <i>Desi</i>      | Ca_Desig_Scaffold00185       | 192240                         | (A/G)       |
| 30891       | CadSNP6486     | <i>Desi</i>      | Ca_Desig_Scaffold00185       | 208965                         | (A/G)       |
| 30892       | CadSNP6487     | <i>Desi</i>      | Ca_Desig_Scaffold00185       | 297692                         | (A/G)       |
| 30893       | CadSNP6488     | <i>Desi</i>      | Ca_Desig_Scaffold00185       | 310357                         | (C/A)       |

| <b>S.N.</b> | <b>SNP IDs</b> | <b>Cultivars</b> | <b>Chromosomes/scaffolds</b> | <b>Physical positions (bp)</b> | <b>SNPs</b> |
|-------------|----------------|------------------|------------------------------|--------------------------------|-------------|
| 30894       | CadSNP6489     | <i>Desi</i>      | Ca_Desig_Scaffold00185       | 320755                         | (T/C)       |
| 30895       | CadSNP6490     | <i>Desi</i>      | Ca_Desig_Scaffold00186       | 29368                          | (G/A)       |
| 30896       | CadSNP6491     | <i>Desi</i>      | Ca_Desig_Scaffold00186       | 29432                          | (G/A)       |
| 30897       | CadSNP6492     | <i>Desi</i>      | Ca_Desig_Scaffold00186       | 29516                          | (G/T)       |
| 30898       | CadSNP6493     | <i>Desi</i>      | Ca_Desig_Scaffold00186       | 89915                          | (T/G)       |
| 30899       | CadSNP6494     | <i>Desi</i>      | Ca_Desig_Scaffold00186       | 122654                         | (G/T)       |
| 30900       | CadSNP6495     | <i>Desi</i>      | Ca_Desig_Scaffold00186       | 122928                         | (G/A)       |
| 30901       | CadSNP6496     | <i>Desi</i>      | Ca_Desig_Scaffold00186       | 122954                         | (C/G)       |
| 30902       | CadSNP6497     | <i>Desi</i>      | Ca_Desig_Scaffold00186       | 123065                         | (C/T)       |
| 30903       | CadSNP6498     | <i>Desi</i>      | Ca_Desig_Scaffold00186       | 125682                         | (T/A)       |
| 30904       | CadSNP6499     | <i>Desi</i>      | Ca_Desig_Scaffold00186       | 128690                         | (G/T)       |
| 30905       | CadSNP6500     | <i>Desi</i>      | Ca_Desig_Scaffold00186       | 128807                         | (T/A)       |
| 30906       | CadSNP6501     | <i>Desi</i>      | Ca_Desig_Scaffold00186       | 128818                         | (A/G)       |
| 30907       | CadSNP6502     | <i>Desi</i>      | Ca_Desig_Scaffold00186       | 128945                         | (T/A)       |
| 30908       | CadSNP6503     | <i>Desi</i>      | Ca_Desig_Scaffold00186       | 128938                         | (T/A)       |
| 30909       | CadSNP6504     | <i>Desi</i>      | Ca_Desig_Scaffold00186       | 128910                         | (C/T)       |
| 30910       | CadSNP6505     | <i>Desi</i>      | Ca_Desig_Scaffold00186       | 128900                         | (C/T)       |
| 30911       | CadSNP6506     | <i>Desi</i>      | Ca_Desig_Scaffold00186       | 129020                         | (C/T)       |
| 30912       | CadSNP6507     | <i>Desi</i>      | Ca_Desig_Scaffold00186       | 129050                         | (C/A)       |
| 30913       | CadSNP6508     | <i>Desi</i>      | Ca_Desig_Scaffold00186       | 139764                         | (A/C)       |
| 30914       | CadSNP6509     | <i>Desi</i>      | Ca_Desig_Scaffold00186       | 140692                         | (T/C)       |
| 30915       | CadSNP6510     | <i>Desi</i>      | Ca_Desig_Scaffold00186       | 167587                         | (T/C)       |
| 30916       | CadSNP6511     | <i>Desi</i>      | Ca_Desig_Scaffold00186       | 170186                         | (T/G)       |
| 30917       | CadSNP6512     | <i>Desi</i>      | Ca_Desig_Scaffold00186       | 170178                         | (T/C)       |
| 30918       | CadSNP6513     | <i>Desi</i>      | Ca_Desig_Scaffold00186       | 170383                         | (T/A)       |
| 30919       | CadSNP6514     | <i>Desi</i>      | Ca_Desig_Scaffold00186       | 170363                         | (G/A)       |
| 30920       | CadSNP6515     | <i>Desi</i>      | Ca_Desig_Scaffold00186       | 170351                         | (G/A)       |
| 30921       | CadSNP6516     | <i>Desi</i>      | Ca_Desig_Scaffold00186       | 170490                         | (A/G)       |
| 30922       | CadSNP6517     | <i>Desi</i>      | Ca_Desig_Scaffold00186       | 170617                         | (G/A)       |
| 30923       | CadSNP6518     | <i>Desi</i>      | Ca_Desig_Scaffold00186       | 170588                         | (A/G)       |
| 30924       | CadSNP6519     | <i>Desi</i>      | Ca_Desig_Scaffold00186       | 170581                         | (G/T)       |
| 30925       | CadSNP6520     | <i>Desi</i>      | Ca_Desig_Scaffold00186       | 170547                         | (A/C)       |
| 30926       | CadSNP6521     | <i>Desi</i>      | Ca_Desig_Scaffold00186       | 170537                         | (G/A)       |
| 30927       | CadSNP6522     | <i>Desi</i>      | Ca_Desig_Scaffold00189       | 34479                          | (T/C)       |
| 30928       | CadSNP6523     | <i>Desi</i>      | Ca_Desig_Scaffold00189       | 34481                          | (A/C)       |
| 30929       | CadSNP6524     | <i>Desi</i>      | Ca_Desig_Scaffold00189       | 34506                          | (C/T)       |
| 30930       | CadSNP6525     | <i>Desi</i>      | Ca_Desig_Scaffold00189       | 34520                          | (T/A)       |
| 30931       | CadSNP6526     | <i>Desi</i>      | Ca_Desig_Scaffold00189       | 34568                          | (G/C)       |



| <b>S.N.</b> | <b>SNP IDs</b> | <b>Cultivars</b> | <b>Chromosomes/scaffolds</b> | <b>Physical positions (bp)</b> | <b>SNPs</b> |
|-------------|----------------|------------------|------------------------------|--------------------------------|-------------|
| 30932       | CadSNP6527     | <i>Desi</i>      | Ca_Desig_Scaffold00189       | 104894                         | (C/T)       |
| 30933       | CadSNP6528     | <i>Desi</i>      | Ca_Desig_Scaffold00189       | 194986                         | (T/G)       |
| 30934       | CadSNP6529     | <i>Desi</i>      | Ca_Desig_Scaffold00189       | 219108                         | (G/C)       |
| 30935       | CadSNP6530     | <i>Desi</i>      | Ca_Desig_Scaffold00192       | 3684                           | (C/G)       |
| 30936       | CadSNP6531     | <i>Desi</i>      | Ca_Desig_Scaffold00192       | 68626                          | (G/A)       |
| 30937       | CadSNP6532     | <i>Desi</i>      | Ca_Desig_Scaffold00192       | 68594                          | (T/C)       |
| 30938       | CadSNP6533     | <i>Desi</i>      | Ca_Desig_Scaffold00192       | 68571                          | (T/A)       |
| 30939       | CadSNP6534     | <i>Desi</i>      | Ca_Desig_Scaffold00192       | 115493                         | (A/C)       |
| 30940       | CadSNP6535     | <i>Desi</i>      | Ca_Desig_Scaffold00192       | 115905                         | (A/C)       |
| 30941       | CadSNP6536     | <i>Desi</i>      | Ca_Desig_Scaffold00192       | 118940                         | (C/T)       |
| 30942       | CadSNP6537     | <i>Desi</i>      | Ca_Desig_Scaffold00192       | 119029                         | (G/A)       |
| 30943       | CadSNP6538     | <i>Desi</i>      | Ca_Desig_Scaffold00192       | 130520                         | (A/G)       |
| 30944       | CadSNP6539     | <i>Desi</i>      | Ca_Desig_Scaffold00192       | 130600                         | (G/T)       |
| 30945       | CadSNP6540     | <i>Desi</i>      | Ca_Desig_Scaffold00192       | 167233                         | (C/T)       |
| 30946       | CadSNP6541     | <i>Desi</i>      | Ca_Desig_Scaffold00192       | 167157                         | (C/A)       |
| 30947       | CadSNP6542     | <i>Desi</i>      | Ca_Desig_Scaffold00192       | 167155                         | (T/A)       |
| 30948       | CadSNP6543     | <i>Desi</i>      | Ca_Desig_Scaffold00192       | 168795                         | (G/T)       |
| 30949       | CadSNP6544     | <i>Desi</i>      | Ca_Desig_Scaffold00192       | 168852                         | (C/T)       |
| 30950       | CadSNP6545     | <i>Desi</i>      | Ca_Desig_Scaffold00192       | 175467                         | (A/G)       |
| 30951       | CadSNP6546     | <i>Desi</i>      | Ca_Desig_Scaffold00192       | 175473                         | (C/A)       |
| 30952       | CadSNP6547     | <i>Desi</i>      | Ca_Desig_Scaffold00192       | 184074                         | (T/C)       |
| 30953       | CadSNP6548     | <i>Desi</i>      | Ca_Desig_Scaffold00192       | 193560                         | (A/G)       |
| 30954       | CadSNP6549     | <i>Desi</i>      | Ca_Desig_Scaffold00192       | 193648                         | (C/T)       |
| 30955       | CadSNP6550     | <i>Desi</i>      | Ca_Desig_Scaffold00192       | 194430                         | (A/T)       |
| 30956       | CadSNP6551     | <i>Desi</i>      | Ca_Desig_Scaffold00192       | 195026                         | (A/G)       |
| 30957       | CadSNP6552     | <i>Desi</i>      | Ca_Desig_Scaffold00192       | 230009                         | (A/G)       |
| 30958       | CadSNP6553     | <i>Desi</i>      | Ca_Desig_Scaffold00192       | 250092                         | (C/T)       |
| 30959       | CadSNP6554     | <i>Desi</i>      | Ca_Desig_Scaffold00195       | 32107                          | (G/T)       |
| 30960       | CadSNP6555     | <i>Desi</i>      | Ca_Desig_Scaffold00195       | 107454                         | (A/C)       |
| 30961       | CadSNP6556     | <i>Desi</i>      | Ca_Desig_Scaffold00195       | 157347                         | (T/C)       |
| 30962       | CadSNP6557     | <i>Desi</i>      | Ca_Desig_Scaffold00195       | 157422                         | (C/T)       |
| 30963       | CadSNP6558     | <i>Desi</i>      | Ca_Desig_Scaffold00195       | 157479                         | (A/G)       |
| 30964       | CadSNP6559     | <i>Desi</i>      | Ca_Desig_Scaffold00195       | 157480                         | (A/G)       |
| 30965       | CadSNP6560     | <i>Desi</i>      | Ca_Desig_Scaffold00195       | 157483                         | (A/G)       |
| 30966       | CadSNP6561     | <i>Desi</i>      | Ca_Desig_Scaffold00195       | 157509                         | (A/T)       |
| 30967       | CadSNP6562     | <i>Desi</i>      | Ca_Desig_Scaffold00195       | 157518                         | (G/A)       |
| 30968       | CadSNP6563     | <i>Desi</i>      | Ca_Desig_Scaffold00197       | 44774                          | (T/C)       |
| 30969       | CadSNP6564     | <i>Desi</i>      | Ca_Desig_Scaffold00198       | 33328                          | (G/A)       |

| <b>S.N.</b> | <b>SNP IDs</b> | <b>Cultivars</b> | <b>Chromosomes/scaffolds</b> | <b>Physical positions (bp)</b> | <b>SNPs</b> |
|-------------|----------------|------------------|------------------------------|--------------------------------|-------------|
| 30970       | CadSNP6565     | <i>Desi</i>      | Ca_Desig_Scaffold00198       | 37325                          | (A/C)       |
| 30971       | CadSNP6566     | <i>Desi</i>      | Ca_Desig_Scaffold00198       | 38274                          | (C/A)       |
| 30972       | CadSNP6567     | <i>Desi</i>      | Ca_Desig_Scaffold00198       | 56679                          | (C/T)       |
| 30973       | CadSNP6568     | <i>Desi</i>      | Ca_Desig_Scaffold00198       | 56706                          | (G/A)       |
| 30974       | CadSNP6569     | <i>Desi</i>      | Ca_Desig_Scaffold00198       | 56729                          | (G/T)       |
| 30975       | CadSNP6570     | <i>Desi</i>      | Ca_Desig_Scaffold00198       | 56842                          | (G/A)       |
| 30976       | CadSNP6571     | <i>Desi</i>      | Ca_Desig_Scaffold00198       | 56938                          | (T/C)       |
| 30977       | CadSNP6572     | <i>Desi</i>      | Ca_Desig_Scaffold00198       | 56936                          | (T/C)       |
| 30978       | CadSNP6573     | <i>Desi</i>      | Ca_Desig_Scaffold00198       | 56929                          | (T/A)       |
| 30979       | CadSNP6574     | <i>Desi</i>      | Ca_Desig_Scaffold00198       | 56926                          | (G/A)       |
| 30980       | CadSNP6575     | <i>Desi</i>      | Ca_Desig_Scaffold00198       | 56923                          | (G/A)       |
| 30981       | CadSNP6576     | <i>Desi</i>      | Ca_Desig_Scaffold00198       | 56917                          | (G/A)       |
| 30982       | CadSNP6577     | <i>Desi</i>      | Ca_Desig_Scaffold00198       | 56914                          | (G/A)       |
| 30983       | CadSNP6578     | <i>Desi</i>      | Ca_Desig_Scaffold00198       | 56905                          | (T/C)       |
| 30984       | CadSNP6579     | <i>Desi</i>      | Ca_Desig_Scaffold00198       | 56902                          | (T/A)       |
| 30985       | CadSNP6580     | <i>Desi</i>      | Ca_Desig_Scaffold00198       | 56899                          | (G/A)       |
| 30986       | CadSNP6581     | <i>Desi</i>      | Ca_Desig_Scaffold00198       | 56896                          | (G/C)       |
| 30987       | CadSNP6582     | <i>Desi</i>      | Ca_Desig_Scaffold00198       | 56874                          | (T/C)       |
| 30988       | CadSNP6583     | <i>Desi</i>      | Ca_Desig_Scaffold00198       | 56873                          | (C/A)       |
| 30989       | CadSNP6584     | <i>Desi</i>      | Ca_Desig_Scaffold00198       | 56866                          | (T/G)       |
| 30990       | CadSNP6585     | <i>Desi</i>      | Ca_Desig_Scaffold00198       | 56857                          | (T/A)       |
| 30991       | CadSNP6586     | <i>Desi</i>      | Ca_Desig_Scaffold00198       | 58641                          | (A/G)       |
| 30992       | CadSNP6587     | <i>Desi</i>      | Ca_Desig_Scaffold00198       | 81198                          | (A/G)       |
| 30993       | CadSNP6588     | <i>Desi</i>      | Ca_Desig_Scaffold00198       | 92912                          | (A/T)       |
| 30994       | CadSNP6589     | <i>Desi</i>      | Ca_Desig_Scaffold00198       | 92917                          | (G/A)       |
| 30995       | CadSNP6590     | <i>Desi</i>      | Ca_Desig_Scaffold00198       | 92923                          | (G/T)       |
| 30996       | CadSNP6591     | <i>Desi</i>      | Ca_Desig_Scaffold00198       | 92924                          | (C/A)       |
| 30997       | CadSNP6592     | <i>Desi</i>      | Ca_Desig_Scaffold00198       | 92929                          | (A/C)       |
| 30998       | CadSNP6593     | <i>Desi</i>      | Ca_Desig_Scaffold00198       | 92930                          | (G/T)       |
| 30999       | CadSNP6594     | <i>Desi</i>      | Ca_Desig_Scaffold00198       | 120090                         | (T/C)       |
| 31000       | CadSNP6595     | <i>Desi</i>      | Ca_Desig_Scaffold00198       | 125851                         | (C/T)       |
| 31001       | CadSNP6596     | <i>Desi</i>      | Ca_Desig_Scaffold00198       | 127126                         | (C/G)       |
| 31002       | CadSNP6597     | <i>Desi</i>      | Ca_Desig_Scaffold00198       | 127237                         | (T/G)       |
| 31003       | CadSNP6598     | <i>Desi</i>      | Ca_Desig_Scaffold00198       | 127227                         | (G/A)       |
| 31004       | CadSNP6599     | <i>Desi</i>      | Ca_Desig_Scaffold00198       | 127225                         | (T/C)       |
| 31005       | CadSNP6600     | <i>Desi</i>      | Ca_Desig_Scaffold00198       | 127224                         | (G/C)       |
| 31006       | CadSNP6601     | <i>Desi</i>      | Ca_Desig_Scaffold00198       | 127217                         | (C/T)       |
| 31007       | CadSNP6602     | <i>Desi</i>      | Ca_Desig_Scaffold00198       | 127216                         | (A/G)       |

| <b>S.N.</b> | <b>SNP IDs</b> | <b>Cultivars</b> | <b>Chromosomes/scaffolds</b> | <b>Physical positions (bp)</b> | <b>SNPs</b> |
|-------------|----------------|------------------|------------------------------|--------------------------------|-------------|
| 31008       | CadSNP6603     | <i>Desi</i>      | Ca_Desig_Scaffold00198       | 127215                         | (T/A)       |
| 31009       | CadSNP6604     | <i>Desi</i>      | Ca_Desig_Scaffold00198       | 127212                         | (A/T)       |
| 31010       | CadSNP6605     | <i>Desi</i>      | Ca_Desig_Scaffold00198       | 127203                         | (C/T)       |
| 31011       | CadSNP6606     | <i>Desi</i>      | Ca_Desig_Scaffold00198       | 127185                         | (A/G)       |
| 31012       | CadSNP6607     | <i>Desi</i>      | Ca_Desig_Scaffold00198       | 129228                         | (T/C)       |
| 31013       | CadSNP6608     | <i>Desi</i>      | Ca_Desig_Scaffold00198       | 129230                         | (G/A)       |
| 31014       | CadSNP6609     | <i>Desi</i>      | Ca_Desig_Scaffold00198       | 129234                         | (T/G)       |
| 31015       | CadSNP6610     | <i>Desi</i>      | Ca_Desig_Scaffold00198       | 129236                         | (T/A)       |
| 31016       | CadSNP6611     | <i>Desi</i>      | Ca_Desig_Scaffold00198       | 129237                         | (T/C)       |
| 31017       | CadSNP6612     | <i>Desi</i>      | Ca_Desig_Scaffold00198       | 129247                         | (C/T)       |
| 31018       | CadSNP6613     | <i>Desi</i>      | Ca_Desig_Scaffold00198       | 129249                         | (C/T)       |
| 31019       | CadSNP6614     | <i>Desi</i>      | Ca_Desig_Scaffold00198       | 129251                         | (A/C)       |
| 31020       | CadSNP6615     | <i>Desi</i>      | Ca_Desig_Scaffold00198       | 129275                         | (C/T)       |
| 31021       | CadSNP6616     | <i>Desi</i>      | Ca_Desig_Scaffold00198       | 129278                         | (A/T)       |
| 31022       | CadSNP6617     | <i>Desi</i>      | Ca_Desig_Scaffold00198       | 129284                         | (G/T)       |
| 31023       | CadSNP6618     | <i>Desi</i>      | Ca_Desig_Scaffold00198       | 129287                         | (A/G)       |
| 31024       | CadSNP6619     | <i>Desi</i>      | Ca_Desig_Scaffold00198       | 129302                         | (C/T)       |
| 31025       | CadSNP6620     | <i>Desi</i>      | Ca_Desig_Scaffold00198       | 129305                         | (A/G)       |
| 31026       | CadSNP6621     | <i>Desi</i>      | Ca_Desig_Scaffold00198       | 129323                         | (T/C)       |
| 31027       | CadSNP6622     | <i>Desi</i>      | Ca_Desig_Scaffold00198       | 129321                         | (C/A)       |
| 31028       | CadSNP6623     | <i>Desi</i>      | Ca_Desig_Scaffold00198       | 129317                         | (T/C)       |
| 31029       | CadSNP6624     | <i>Desi</i>      | Ca_Desig_Scaffold00198       | 129311                         | (T/A)       |
| 31030       | CadSNP6625     | <i>Desi</i>      | Ca_Desig_Scaffold00198       | 194400                         | (C/G)       |
| 31031       | CadSNP6626     | <i>Desi</i>      | Ca_Desig_Scaffold00198       | 198739                         | (A/C)       |
| 31032       | CadSNP6627     | <i>Desi</i>      | Ca_Desig_Scaffold00198       | 214826                         | (C/T)       |
| 31033       | CadSNP6628     | <i>Desi</i>      | Ca_Desig_Scaffold00198       | 214956                         | (A/G)       |
| 31034       | CadSNP6629     | <i>Desi</i>      | Ca_Desig_Scaffold00198       | 221315                         | (G/A)       |
| 31035       | CadSNP6630     | <i>Desi</i>      | Ca_Desig_Scaffold00198       | 221663                         | (T/C)       |
| 31036       | CadSNP6631     | <i>Desi</i>      | Ca_Desig_Scaffold00198       | 221660                         | (C/T)       |
| 31037       | CadSNP6632     | <i>Desi</i>      | Ca_Desig_Scaffold00198       | 221657                         | (C/T)       |
| 31038       | CadSNP6633     | <i>Desi</i>      | Ca_Desig_Scaffold00198       | 221651                         | (A/T)       |
| 31039       | CadSNP6634     | <i>Desi</i>      | Ca_Desig_Scaffold00198       | 221646                         | (G/A)       |
| 31040       | CadSNP6635     | <i>Desi</i>      | Ca_Desig_Scaffold00198       | 221639                         | (C/T)       |
| 31041       | CadSNP6636     | <i>Desi</i>      | Ca_Desig_Scaffold00198       | 221630                         | (A/G)       |
| 31042       | CadSNP6637     | <i>Desi</i>      | Ca_Desig_Scaffold00198       | 221624                         | (A/G)       |
| 31043       | CadSNP6638     | <i>Desi</i>      | Ca_Desig_Scaffold00198       | 221621                         | (C/A)       |
| 31044       | CadSNP6639     | <i>Desi</i>      | Ca_Desig_Scaffold00198       | 221615                         | (C/T)       |
| 31045       | CadSNP6640     | <i>Desi</i>      | Ca_Desig_Scaffold00198       | 222787                         | (G/A)       |

| <b>S.N.</b> | <b>SNP IDs</b> | <b>Cultivars</b> | <b>Chromosomes/scaffolds</b> | <b>Physical positions (bp)</b> | <b>SNPs</b> |
|-------------|----------------|------------------|------------------------------|--------------------------------|-------------|
| 31046       | CadSNP6641     | <i>Desi</i>      | Ca_Desig_Scaffold00198       | 222870                         | (C/T)       |
| 31047       | CadSNP6642     | <i>Desi</i>      | Ca_Desig_Scaffold00201       | 14745                          | (A/C)       |
| 31048       | CadSNP6643     | <i>Desi</i>      | Ca_Desig_Scaffold00201       | 14823                          | (A/G)       |
| 31049       | CadSNP6644     | <i>Desi</i>      | Ca_Desig_Scaffold00201       | 48334                          | (G/A)       |
| 31050       | CadSNP6645     | <i>Desi</i>      | Ca_Desig_Scaffold00201       | 48403                          | (T/C)       |
| 31051       | CadSNP6646     | <i>Desi</i>      | Ca_Desig_Scaffold00201       | 71030                          | (A/C)       |
| 31052       | CadSNP6647     | <i>Desi</i>      | Ca_Desig_Scaffold00201       | 86483                          | (G/A)       |
| 31053       | CadSNP6648     | <i>Desi</i>      | Ca_Desig_Scaffold00201       | 86504                          | (A/T)       |
| 31054       | CadSNP6649     | <i>Desi</i>      | Ca_Desig_Scaffold00201       | 86529                          | (C/T)       |
| 31055       | CadSNP6650     | <i>Desi</i>      | Ca_Desig_Scaffold00201       | 91208                          | (C/A)       |
| 31056       | CadSNP6651     | <i>Desi</i>      | Ca_Desig_Scaffold00201       | 99027                          | (T/C)       |
| 31057       | CadSNP6652     | <i>Desi</i>      | Ca_Desig_Scaffold00201       | 133497                         | (C/T)       |
| 31058       | CadSNP6653     | <i>Desi</i>      | Ca_Desig_Scaffold00201       | 183190                         | (C/T)       |
| 31059       | CadSNP6654     | <i>Desi</i>      | Ca_Desig_Scaffold00201       | 243244                         | (A/T)       |
| 31060       | CadSNP6655     | <i>Desi</i>      | Ca_Desig_Scaffold00203       | 219495                         | (C/T)       |
| 31061       | CadSNP6656     | <i>Desi</i>      | Ca_Desig_Scaffold00203       | 219498                         | (A/T)       |
| 31062       | CadSNP6657     | <i>Desi</i>      | Ca_Desig_Scaffold00203       | 219503                         | (T/C)       |
| 31063       | CadSNP6658     | <i>Desi</i>      | Ca_Desig_Scaffold00203       | 219524                         | (A/T)       |
| 31064       | CadSNP6659     | <i>Desi</i>      | Ca_Desig_Scaffold00205       | 86217                          | (G/T)       |
| 31065       | CadSNP6660     | <i>Desi</i>      | Ca_Desig_Scaffold00205       | 89202                          | (A/G)       |
| 31066       | CadSNP6661     | <i>Desi</i>      | Ca_Desig_Scaffold00205       | 89221                          | (C/T)       |
| 31067       | CadSNP6662     | <i>Desi</i>      | Ca_Desig_Scaffold00205       | 120215                         | (C/T)       |
| 31068       | CadSNP6663     | <i>Desi</i>      | Ca_Desig_Scaffold00205       | 129498                         | (C/T)       |
| 31069       | CadSNP6664     | <i>Desi</i>      | Ca_Desig_Scaffold00205       | 214041                         | (A/G)       |
| 31070       | CadSNP6665     | <i>Desi</i>      | Ca_Desig_Scaffold00205       | 231224                         | (G/T)       |
| 31071       | CadSNP6666     | <i>Desi</i>      | Ca_Desig_Scaffold00205       | 231239                         | (C/T)       |
| 31072       | CadSNP6667     | <i>Desi</i>      | Ca_Desig_Scaffold00205       | 231384                         | (G/A)       |
| 31073       | CadSNP6668     | <i>Desi</i>      | Ca_Desig_Scaffold00205       | 231408                         | (G/A)       |
| 31074       | CadSNP6669     | <i>Desi</i>      | Ca_Desig_Scaffold00205       | 234325                         | (T/C)       |
| 31075       | CadSNP6670     | <i>Desi</i>      | Ca_Desig_Scaffold00205       | 246703                         | (T/A)       |
| 31076       | CadSNP6671     | <i>Desi</i>      | Ca_Desig_Scaffold00205       | 246722                         | (G/A)       |
| 31077       | CadSNP6672     | <i>Desi</i>      | Ca_Desig_Scaffold00206       | 133708                         | (C/T)       |
| 31078       | CadSNP6673     | <i>Desi</i>      | Ca_Desig_Scaffold00206       | 177814                         | (G/C)       |
| 31079       | CadSNP6674     | <i>Desi</i>      | Ca_Desig_Scaffold00206       | 240969                         | (T/C)       |
| 31080       | CadSNP6675     | <i>Desi</i>      | Ca_Desig_Scaffold00207       | 3804                           | (T/C)       |
| 31081       | CadSNP6676     | <i>Desi</i>      | Ca_Desig_Scaffold00207       | 3862                           | (T/C)       |
| 31082       | CadSNP6677     | <i>Desi</i>      | Ca_Desig_Scaffold00207       | 3890                           | (G/A)       |
| 31083       | CadSNP6678     | <i>Desi</i>      | Ca_Desig_Scaffold00207       | 3944                           | (A/G)       |

| <b>S.N.</b> | <b>SNP IDs</b> | <b>Cultivars</b> | <b>Chromosomes/scaffolds</b> | <b>Physical positions (bp)</b> | <b>SNPs</b> |
|-------------|----------------|------------------|------------------------------|--------------------------------|-------------|
| 31084       | CadSNP6679     | <i>Desi</i>      | Ca_Desig_Scaffold00207       | 3977                           | (G/A)       |
| 31085       | CadSNP6680     | <i>Desi</i>      | Ca_Desig_Scaffold00207       | 4040                           | (A/G)       |
| 31086       | CadSNP6681     | <i>Desi</i>      | Ca_Desig_Scaffold00207       | 6867                           | (T/C)       |
| 31087       | CadSNP6682     | <i>Desi</i>      | Ca_Desig_Scaffold00207       | 19252                          | (G/C)       |
| 31088       | CadSNP6683     | <i>Desi</i>      | Ca_Desig_Scaffold00207       | 30365                          | (G/C)       |
| 31089       | CadSNP6684     | <i>Desi</i>      | Ca_Desig_Scaffold00207       | 101457                         | (G/A)       |
| 31090       | CadSNP6685     | <i>Desi</i>      | Ca_Desig_Scaffold00207       | 164041                         | (T/C)       |
| 31091       | CadSNP6686     | <i>Desi</i>      | Ca_Desig_Scaffold00207       | 164148                         | (C/A)       |
| 31092       | CadSNP6687     | <i>Desi</i>      | Ca_Desig_Scaffold00208       | 63521                          | (T/C)       |
| 31093       | CadSNP6688     | <i>Desi</i>      | Ca_Desig_Scaffold00210       | 50778                          | (G/T)       |
| 31094       | CadSNP6689     | <i>Desi</i>      | Ca_Desig_Scaffold00210       | 55379                          | (T/C)       |
| 31095       | CadSNP6690     | <i>Desi</i>      | Ca_Desig_Scaffold00210       | 175476                         | (C/T)       |
| 31096       | CadSNP6691     | <i>Desi</i>      | Ca_Desig_Scaffold00210       | 205225                         | (G/A)       |
| 31097       | CadSNP6692     | <i>Desi</i>      | Ca_Desig_Scaffold00210       | 205282                         | (G/C)       |
| 31098       | CadSNP6693     | <i>Desi</i>      | Ca_Desig_Scaffold00210       | 205505                         | (T/C)       |
| 31099       | CadSNP6694     | <i>Desi</i>      | Ca_Desig_Scaffold00210       | 205501                         | (C/T)       |
| 31100       | CadSNP6695     | <i>Desi</i>      | Ca_Desig_Scaffold00210       | 205498                         | (G/A)       |
| 31101       | CadSNP6696     | <i>Desi</i>      | Ca_Desig_Scaffold00210       | 205495                         | (A/G)       |
| 31102       | CadSNP6697     | <i>Desi</i>      | Ca_Desig_Scaffold00210       | 205473                         | (A/G)       |
| 31103       | CadSNP6698     | <i>Desi</i>      | Ca_Desig_Scaffold00210       | 205439                         | (C/A)       |
| 31104       | CadSNP6699     | <i>Desi</i>      | Ca_Desig_Scaffold00210       | 205429                         | (A/G)       |
| 31105       | CadSNP6700     | <i>Desi</i>      | Ca_Desig_Scaffold00210       | 239340                         | (C/G)       |
| 31106       | CadSNP6701     | <i>Desi</i>      | Ca_Desig_Scaffold00210       | 239452                         | (G/A)       |
| 31107       | CadSNP6702     | <i>Desi</i>      | Ca_Desig_Scaffold00210       | 239446                         | (T/C)       |
| 31108       | CadSNP6703     | <i>Desi</i>      | Ca_Desig_Scaffold00210       | 239413                         | (C/A)       |
| 31109       | CadSNP6704     | <i>Desi</i>      | Ca_Desig_Scaffold00211       | 793                            | (C/A)       |
| 31110       | CadSNP6705     | <i>Desi</i>      | Ca_Desig_Scaffold00211       | 735                            | (G/A)       |
| 31111       | CadSNP6706     | <i>Desi</i>      | Ca_Desig_Scaffold00211       | 767                            | (T/G)       |
| 31112       | CadSNP6707     | <i>Desi</i>      | Ca_Desig_Scaffold00211       | 17731                          | (T/C)       |
| 31113       | CadSNP6708     | <i>Desi</i>      | Ca_Desig_Scaffold00211       | 60878                          | (C/T)       |
| 31114       | CadSNP6709     | <i>Desi</i>      | Ca_Desig_Scaffold00211       | 242967                         | (A/C)       |
| 31115       | CadSNP6710     | <i>Desi</i>      | Ca_Desig_Scaffold00211       | 247464                         | (C/T)       |
| 31116       | CadSNP6711     | <i>Desi</i>      | Ca_Desig_Scaffold00211       | 247446                         | (A/G)       |
| 31117       | CadSNP6712     | <i>Desi</i>      | Ca_Desig_Scaffold00211       | 247430                         | (G/A)       |
| 31118       | CadSNP6713     | <i>Desi</i>      | Ca_Desig_Scaffold00211       | 247429                         | (C/G)       |
| 31119       | CadSNP6714     | <i>Desi</i>      | Ca_Desig_Scaffold00211       | 247419                         | (C/T)       |
| 31120       | CadSNP6715     | <i>Desi</i>      | Ca_Desig_Scaffold00211       | 247418                         | (G/A)       |
| 31121       | CadSNP6716     | <i>Desi</i>      | Ca_Desig_Scaffold00211       | 247406                         | (C/T)       |

| <b>S.N.</b> | <b>SNP IDs</b> | <b>Cultivars</b> | <b>Chromosomes/scaffolds</b> | <b>Physical positions (bp)</b> | <b>SNPs</b> |
|-------------|----------------|------------------|------------------------------|--------------------------------|-------------|
| 31122       | CadSNP6717     | <i>Desi</i>      | Ca_Desig_Scaffold00211       | 247405                         | (C/T)       |
| 31123       | CadSNP6718     | <i>Desi</i>      | Ca_Desig_Scaffold00211       | 247394                         | (C/A)       |
| 31124       | CadSNP6719     | <i>Desi</i>      | Ca_Desig_Scaffold00211       | 247384                         | (C/A)       |
| 31125       | CadSNP6720     | <i>Desi</i>      | Ca_Desig_Scaffold00212       | 97102                          | (G/C)       |
| 31126       | CadSNP6721     | <i>Desi</i>      | Ca_Desig_Scaffold00212       | 152385                         | (G/A)       |
| 31127       | CadSNP6722     | <i>Desi</i>      | Ca_Desig_Scaffold00212       | 167085                         | (A/G)       |
| 31128       | CadSNP6723     | <i>Desi</i>      | Ca_Desig_Scaffold00212       | 167077                         | (C/G)       |
| 31129       | CadSNP6724     | <i>Desi</i>      | Ca_Desig_Scaffold00212       | 167076                         | (A/T)       |
| 31130       | CadSNP6725     | <i>Desi</i>      | Ca_Desig_Scaffold00212       | 167075                         | (A/C)       |
| 31131       | CadSNP6726     | <i>Desi</i>      | Ca_Desig_Scaffold00212       | 167074                         | (A/C)       |
| 31132       | CadSNP6727     | <i>Desi</i>      | Ca_Desig_Scaffold00212       | 167073                         | (T/C)       |
| 31133       | CadSNP6728     | <i>Desi</i>      | Ca_Desig_Scaffold00212       | 167067                         | (A/G)       |
| 31134       | CadSNP6729     | <i>Desi</i>      | Ca_Desig_Scaffold00212       | 167059                         | (T/C)       |
| 31135       | CadSNP6730     | <i>Desi</i>      | Ca_Desig_Scaffold00212       | 167058                         | (C/G)       |
| 31136       | CadSNP6731     | <i>Desi</i>      | Ca_Desig_Scaffold00212       | 167034                         | (G/A)       |
| 31137       | CadSNP6732     | <i>Desi</i>      | Ca_Desig_Scaffold00212       | 167016                         | (G/A)       |
| 31138       | CadSNP6733     | <i>Desi</i>      | Ca_Desig_Scaffold00212       | 167009                         | (C/G)       |
| 31139       | CadSNP6734     | <i>Desi</i>      | Ca_Desig_Scaffold00212       | 235220                         | (T/C)       |
| 31140       | CadSNP6735     | <i>Desi</i>      | Ca_Desig_Scaffold00215       | 34192                          | (C/T)       |
| 31141       | CadSNP6736     | <i>Desi</i>      | Ca_Desig_Scaffold00215       | 34219                          | (G/A)       |
| 31142       | CadSNP6737     | <i>Desi</i>      | Ca_Desig_Scaffold00215       | 132828                         | (T/C)       |
| 31143       | CadSNP6738     | <i>Desi</i>      | Ca_Desig_Scaffold00215       | 132830                         | (A/T)       |
| 31144       | CadSNP6739     | <i>Desi</i>      | Ca_Desig_Scaffold00215       | 132887                         | (G/C)       |
| 31145       | CadSNP6740     | <i>Desi</i>      | Ca_Desig_Scaffold00215       | 132942                         | (A/G)       |
| 31146       | CadSNP6741     | <i>Desi</i>      | Ca_Desig_Scaffold00215       | 132926                         | (G/T)       |
| 31147       | CadSNP6742     | <i>Desi</i>      | Ca_Desig_Scaffold00215       | 132925                         | (C/G)       |
| 31148       | CadSNP6743     | <i>Desi</i>      | Ca_Desig_Scaffold00215       | 132894                         | (C/T)       |
| 31149       | CadSNP6744     | <i>Desi</i>      | Ca_Desig_Scaffold00216       | 12050                          | (A/T)       |
| 31150       | CadSNP6745     | <i>Desi</i>      | Ca_Desig_Scaffold00216       | 12126                          | (A/T)       |
| 31151       | CadSNP6746     | <i>Desi</i>      | Ca_Desig_Scaffold00216       | 12128                          | (A/C)       |
| 31152       | CadSNP6747     | <i>Desi</i>      | Ca_Desig_Scaffold00216       | 12262                          | (C/A)       |
| 31153       | CadSNP6748     | <i>Desi</i>      | Ca_Desig_Scaffold00216       | 12257                          | (T/G)       |
| 31154       | CadSNP6749     | <i>Desi</i>      | Ca_Desig_Scaffold00216       | 12255                          | (G/A)       |
| 31155       | CadSNP6750     | <i>Desi</i>      | Ca_Desig_Scaffold00216       | 34304                          | (A/C)       |
| 31156       | CadSNP6751     | <i>Desi</i>      | Ca_Desig_Scaffold00216       | 145017                         | (T/G)       |
| 31157       | CadSNP6752     | <i>Desi</i>      | Ca_Desig_Scaffold00225       | 698                            | (G/T)       |
| 31158       | CadSNP6753     | <i>Desi</i>      | Ca_Desig_Scaffold00225       | 19808                          | (C/G)       |
| 31159       | CadSNP6754     | <i>Desi</i>      | Ca_Desig_Scaffold00225       | 143614                         | (C/A)       |

| <b>S.N.</b> | <b>SNP IDs</b> | <b>Cultivars</b> | <b>Chromosomes/scaffolds</b> | <b>Physical positions (bp)</b> | <b>SNPs</b> |
|-------------|----------------|------------------|------------------------------|--------------------------------|-------------|
| 31160       | CadSNP6755     | <i>Desi</i>      | Ca_Desig_Scaffold00225       | 144336                         | (T/C)       |
| 31161       | CadSNP6756     | <i>Desi</i>      | Ca_Desig_Scaffold00225       | 144335                         | (C/A)       |
| 31162       | CadSNP6757     | <i>Desi</i>      | Ca_Desig_Scaffold00225       | 144320                         | (T/C)       |
| 31163       | CadSNP6758     | <i>Desi</i>      | Ca_Desig_Scaffold00225       | 144428                         | (A/C)       |
| 31164       | CadSNP6759     | <i>Desi</i>      | Ca_Desig_Scaffold00225       | 144434                         | (G/A)       |
| 31165       | CadSNP6760     | <i>Desi</i>      | Ca_Desig_Scaffold00225       | 144569                         | (C/T)       |
| 31166       | CadSNP6761     | <i>Desi</i>      | Ca_Desig_Scaffold00225       | 175798                         | (G/A)       |
| 31167       | CadSNP6762     | <i>Desi</i>      | Ca_Desig_Scaffold00225       | 175786                         | (T/G)       |
| 31168       | CadSNP6763     | <i>Desi</i>      | Ca_Desig_Scaffold00225       | 192552                         | (A/G)       |
| 31169       | CadSNP6764     | <i>Desi</i>      | Ca_Desig_Scaffold00225       | 192508                         | (C/T)       |
| 31170       | CadSNP6765     | <i>Desi</i>      | Ca_Desig_Scaffold00225       | 192502                         | (A/T)       |
| 31171       | CadSNP6766     | <i>Desi</i>      | Ca_Desig_Scaffold00225       | 192488                         | (A/T)       |
| 31172       | CadSNP6767     | <i>Desi</i>      | Ca_Desig_Scaffold00225       | 212410                         | (T/A)       |
| 31173       | CadSNP6768     | <i>Desi</i>      | Ca_Desig_Scaffold00225       | 212421                         | (A/C)       |
| 31174       | CadSNP6769     | <i>Desi</i>      | Ca_Desig_Scaffold00225       | 212425                         | (T/A)       |
| 31175       | CadSNP6770     | <i>Desi</i>      | Ca_Desig_Scaffold00225       | 222302                         | (T/G)       |
| 31176       | CadSNP6771     | <i>Desi</i>      | Ca_Desig_Scaffold00225       | 222300                         | (C/T)       |
| 31177       | CadSNP6772     | <i>Desi</i>      | Ca_Desig_Scaffold00225       | 230832                         | (A/T)       |
| 31178       | CadSNP6773     | <i>Desi</i>      | Ca_Desig_Scaffold00226       | 92894                          | (T/A)       |
| 31179       | CadSNP6774     | <i>Desi</i>      | Ca_Desig_Scaffold00226       | 92909                          | (A/G)       |
| 31180       | CadSNP6775     | <i>Desi</i>      | Ca_Desig_Scaffold00226       | 92920                          | (C/T)       |
| 31181       | CadSNP6776     | <i>Desi</i>      | Ca_Desig_Scaffold00226       | 92942                          | (C/G)       |
| 31182       | CadSNP6777     | <i>Desi</i>      | Ca_Desig_Scaffold00226       | 93009                          | (C/T)       |
| 31183       | CadSNP6778     | <i>Desi</i>      | Ca_Desig_Scaffold00226       | 99716                          | (T/A)       |
| 31184       | CadSNP6779     | <i>Desi</i>      | Ca_Desig_Scaffold00226       | 157640                         | (C/T)       |
| 31185       | CadSNP6780     | <i>Desi</i>      | Ca_Desig_Scaffold00226       | 157590                         | (T/G)       |
| 31186       | CadSNP6781     | <i>Desi</i>      | Ca_Desig_Scaffold00226       | 165258                         | (T/A)       |
| 31187       | CadSNP6782     | <i>Desi</i>      | Ca_Desig_Scaffold00226       | 168229                         | (T/G)       |
| 31188       | CadSNP6783     | <i>Desi</i>      | Ca_Desig_Scaffold00226       | 198472                         | (C/T)       |
| 31189       | CadSNP6784     | <i>Desi</i>      | Ca_Desig_Scaffold00226       | 218338                         | (C/T)       |
| 31190       | CadSNP6785     | <i>Desi</i>      | Ca_Desig_Scaffold00226       | 220298                         | (G/A)       |
| 31191       | CadSNP6786     | <i>Desi</i>      | Ca_Desig_Scaffold00226       | 230811                         | (A/G)       |
| 31192       | CadSNP6787     | <i>Desi</i>      | Ca_Desig_Scaffold00227       | 63053                          | (A/G)       |
| 31193       | CadSNP6788     | <i>Desi</i>      | Ca_Desig_Scaffold00227       | 64006                          | (T/C)       |
| 31194       | CadSNP6789     | <i>Desi</i>      | Ca_Desig_Scaffold00227       | 64055                          | (G/A)       |
| 31195       | CadSNP6790     | <i>Desi</i>      | Ca_Desig_Scaffold00227       | 64057                          | (T/G)       |
| 31196       | CadSNP6791     | <i>Desi</i>      | Ca_Desig_Scaffold00227       | 94188                          | (A/G)       |
| 31197       | CadSNP6792     | <i>Desi</i>      | Ca_Desig_Scaffold00227       | 184099                         | (C/T)       |

| <b>S.N.</b> | <b>SNP IDs</b> | <b>Cultivars</b> | <b>Chromosomes/scaffolds</b> | <b>Physical positions (bp)</b> | <b>SNPs</b> |
|-------------|----------------|------------------|------------------------------|--------------------------------|-------------|
| 31198       | CadSNP6793     | <i>Desi</i>      | Ca_Desig_Scaffold00229       | 100390                         | (G/C)       |
| 31199       | CadSNP6794     | <i>Desi</i>      | Ca_Desig_Scaffold00229       | 136282                         | (A/G)       |
| 31200       | CadSNP6795     | <i>Desi</i>      | Ca_Desig_Scaffold00232       | 149099                         | (G/A)       |
| 31201       | CadSNP6796     | <i>Desi</i>      | Ca_Desig_Scaffold00232       | 149089                         | (C/G)       |
| 31202       | CadSNP6797     | <i>Desi</i>      | Ca_Desig_Scaffold00232       | 149083                         | (C/A)       |
| 31203       | CadSNP6798     | <i>Desi</i>      | Ca_Desig_Scaffold00232       | 149204                         | (C/T)       |
| 31204       | CadSNP6799     | <i>Desi</i>      | Ca_Desig_Scaffold00232       | 149183                         | (T/A)       |
| 31205       | CadSNP6800     | <i>Desi</i>      | Ca_Desig_Scaffold00232       | 232212                         | (A/C)       |
| 31206       | CadSNP6801     | <i>Desi</i>      | Ca_Desig_Scaffold00233       | 4551                           | (C/A)       |
| 31207       | CadSNP6802     | <i>Desi</i>      | Ca_Desig_Scaffold00233       | 50002                          | (G/C)       |
| 31208       | CadSNP6803     | <i>Desi</i>      | Ca_Desig_Scaffold00233       | 50056                          | (C/A)       |
| 31209       | CadSNP6804     | <i>Desi</i>      | Ca_Desig_Scaffold00233       | 50061                          | (T/C)       |
| 31210       | CadSNP6805     | <i>Desi</i>      | Ca_Desig_Scaffold00233       | 50084                          | (A/C)       |
| 31211       | CadSNP6806     | <i>Desi</i>      | Ca_Desig_Scaffold00233       | 120369                         | (C/G)       |
| 31212       | CadSNP6807     | <i>Desi</i>      | Ca_Desig_Scaffold00233       | 120597                         | (G/A)       |
| 31213       | CadSNP6808     | <i>Desi</i>      | Ca_Desig_Scaffold00233       | 148009                         | (C/T)       |
| 31214       | CadSNP6809     | <i>Desi</i>      | Ca_Desig_Scaffold00233       | 184158                         | (A/C)       |
| 31215       | CadSNP6810     | <i>Desi</i>      | Ca_Desig_Scaffold00233       | 184202                         | (T/C)       |
| 31216       | CadSNP6811     | <i>Desi</i>      | Ca_Desig_Scaffold00233       | 215896                         | (T/G)       |
| 31217       | CadSNP6812     | <i>Desi</i>      | Ca_Desig_Scaffold00233       | 232621                         | (T/C)       |
| 31218       | CadSNP6813     | <i>Desi</i>      | Ca_Desig_Scaffold00236       | 49635                          | (A/T)       |
| 31219       | CadSNP6814     | <i>Desi</i>      | Ca_Desig_Scaffold00236       | 49683                          | (T/C)       |
| 31220       | CadSNP6815     | <i>Desi</i>      | Ca_Desig_Scaffold00236       | 49690                          | (A/G)       |
| 31221       | CadSNP6816     | <i>Desi</i>      | Ca_Desig_Scaffold00236       | 49694                          | (G/A)       |
| 31222       | CadSNP6817     | <i>Desi</i>      | Ca_Desig_Scaffold00236       | 49697                          | (A/C)       |
| 31223       | CadSNP6818     | <i>Desi</i>      | Ca_Desig_Scaffold00236       | 88072                          | (C/T)       |
| 31224       | CadSNP6819     | <i>Desi</i>      | Ca_Desig_Scaffold00236       | 108276                         | (T/G)       |
| 31225       | CadSNP6820     | <i>Desi</i>      | Ca_Desig_Scaffold00236       | 108281                         | (C/T)       |
| 31226       | CadSNP6821     | <i>Desi</i>      | Ca_Desig_Scaffold00236       | 108288                         | (C/G)       |
| 31227       | CadSNP6822     | <i>Desi</i>      | Ca_Desig_Scaffold00236       | 108309                         | (G/A)       |
| 31228       | CadSNP6823     | <i>Desi</i>      | Ca_Desig_Scaffold00236       | 108325                         | (G/T)       |
| 31229       | CadSNP6824     | <i>Desi</i>      | Ca_Desig_Scaffold00236       | 149619                         | (T/C)       |
| 31230       | CadSNP6825     | <i>Desi</i>      | Ca_Desig_Scaffold00236       | 149623                         | (A/T)       |
| 31231       | CadSNP6826     | <i>Desi</i>      | Ca_Desig_Scaffold00236       | 149734                         | (A/G)       |
| 31232       | CadSNP6827     | <i>Desi</i>      | Ca_Desig_Scaffold00236       | 149710                         | (T/G)       |
| 31233       | CadSNP6828     | <i>Desi</i>      | Ca_Desig_Scaffold00236       | 149769                         | (G/T)       |
| 31234       | CadSNP6829     | <i>Desi</i>      | Ca_Desig_Scaffold00236       | 149775                         | (A/G)       |
| 31235       | CadSNP6830     | <i>Desi</i>      | Ca_Desig_Scaffold00236       | 163118                         | (G/A)       |



| <b>S.N.</b> | <b>SNP IDs</b> | <b>Cultivars</b> | <b>Chromosomes/scaffolds</b> | <b>Physical positions (bp)</b> | <b>SNPs</b> |
|-------------|----------------|------------------|------------------------------|--------------------------------|-------------|
| 31236       | CadSNP6831     | <i>Desi</i>      | Ca_Desig_Scaffold00236       | 163222                         | (A/C)       |
| 31237       | CadSNP6832     | <i>Desi</i>      | Ca_Desig_Scaffold00236       | 163211                         | (G/A)       |
| 31238       | CadSNP6833     | <i>Desi</i>      | Ca_Desig_Scaffold00236       | 163209                         | (C/T)       |
| 31239       | CadSNP6834     | <i>Desi</i>      | Ca_Desig_Scaffold00236       | 163204                         | (T/G)       |
| 31240       | CadSNP6835     | <i>Desi</i>      | Ca_Desig_Scaffold00236       | 163201                         | (T/A)       |
| 31241       | CadSNP6836     | <i>Desi</i>      | Ca_Desig_Scaffold00236       | 163200                         | (C/G)       |
| 31242       | CadSNP6837     | <i>Desi</i>      | Ca_Desig_Scaffold00236       | 163199                         | (G/A)       |
| 31243       | CadSNP6838     | <i>Desi</i>      | Ca_Desig_Scaffold00236       | 163192                         | (T/A)       |
| 31244       | CadSNP6839     | <i>Desi</i>      | Ca_Desig_Scaffold00236       | 163185                         | (G/T)       |
| 31245       | CadSNP6840     | <i>Desi</i>      | Ca_Desig_Scaffold00236       | 163591                         | (G/A)       |
| 31246       | CadSNP6841     | <i>Desi</i>      | Ca_Desig_Scaffold00236       | 165010                         | (T/C)       |
| 31247       | CadSNP6842     | <i>Desi</i>      | Ca_Desig_Scaffold00236       | 165033                         | (A/C)       |
| 31248       | CadSNP6843     | <i>Desi</i>      | Ca_Desig_Scaffold00236       | 165037                         | (A/G)       |
| 31249       | CadSNP6844     | <i>Desi</i>      | Ca_Desig_Scaffold00236       | 173224                         | (A/G)       |
| 31250       | CadSNP6845     | <i>Desi</i>      | Ca_Desig_Scaffold00236       | 173341                         | (C/T)       |
| 31251       | CadSNP6846     | <i>Desi</i>      | Ca_Desig_Scaffold00236       | 177722                         | (C/A)       |
| 31252       | CadSNP6847     | <i>Desi</i>      | Ca_Desig_Scaffold00236       | 190969                         | (A/G)       |
| 31253       | CadSNP6848     | <i>Desi</i>      | Ca_Desig_Scaffold00236       | 190990                         | (G/C)       |
| 31254       | CadSNP6849     | <i>Desi</i>      | Ca_Desig_Scaffold00236       | 191027                         | (A/G)       |
| 31255       | CadSNP6850     | <i>Desi</i>      | Ca_Desig_Scaffold00236       | 191101                         | (C/T)       |
| 31256       | CadSNP6851     | <i>Desi</i>      | Ca_Desig_Scaffold00236       | 191042                         | (T/G)       |
| 31257       | CadSNP6852     | <i>Desi</i>      | Ca_Desig_Scaffold00242       | 70977                          | (A/G)       |
| 31258       | CadSNP6853     | <i>Desi</i>      | Ca_Desig_Scaffold00242       | 124315                         | (G/A)       |
| 31259       | CadSNP6854     | <i>Desi</i>      | Ca_Desig_Scaffold00245       | 116599                         | (T/C)       |
| 31260       | CadSNP6855     | <i>Desi</i>      | Ca_Desig_Scaffold00245       | 116743                         | (T/C)       |
| 31261       | CadSNP6856     | <i>Desi</i>      | Ca_Desig_Scaffold00245       | 154579                         | (T/C)       |
| 31262       | CadSNP6857     | <i>Desi</i>      | Ca_Desig_Scaffold00245       | 188378                         | (T/C)       |
| 31263       | CadSNP6858     | <i>Desi</i>      | Ca_Desig_Scaffold00245       | 203981                         | (G/C)       |
| 31264       | CadSNP6859     | <i>Desi</i>      | Ca_Desig_Scaffold00245       | 204003                         | (A/C)       |
| 31265       | CadSNP6860     | <i>Desi</i>      | Ca_Desig_Scaffold00245       | 213504                         | (C/G)       |
| 31266       | CadSNP6861     | <i>Desi</i>      | Ca_Desig_Scaffold00245       | 213500                         | (C/T)       |
| 31267       | CadSNP6862     | <i>Desi</i>      | Ca_Desig_Scaffold00245       | 213491                         | (G/C)       |
| 31268       | CadSNP6863     | <i>Desi</i>      | Ca_Desig_Scaffold00246       | 146                            | (G/A)       |
| 31269       | CadSNP6864     | <i>Desi</i>      | Ca_Desig_Scaffold00246       | 147                            | (C/A)       |
| 31270       | CadSNP6865     | <i>Desi</i>      | Ca_Desig_Scaffold00246       | 185                            | (C/G)       |
| 31271       | CadSNP6866     | <i>Desi</i>      | Ca_Desig_Scaffold00246       | 330                            | (A/G)       |
| 31272       | CadSNP6867     | <i>Desi</i>      | Ca_Desig_Scaffold00246       | 12998                          | (C/T)       |
| 31273       | CadSNP6868     | <i>Desi</i>      | Ca_Desig_Scaffold00246       | 115778                         | (T/C)       |

| <b>S.N.</b> | <b>SNP IDs</b> | <b>Cultivars</b> | <b>Chromosomes/scaffolds</b> | <b>Physical positions (bp)</b> | <b>SNPs</b> |
|-------------|----------------|------------------|------------------------------|--------------------------------|-------------|
| 31274       | CadSNP6869     | <i>Desi</i>      | Ca_Desig_Scaffold00246       | 115797                         | (G/A)       |
| 31275       | CadSNP6870     | <i>Desi</i>      | Ca_Desig_Scaffold00246       | 115858                         | (G/T)       |
| 31276       | CadSNP6871     | <i>Desi</i>      | Ca_Desig_Scaffold00246       | 115850                         | (A/T)       |
| 31277       | CadSNP6872     | <i>Desi</i>      | Ca_Desig_Scaffold00249       | 27017                          | (G/A)       |
| 31278       | CadSNP6873     | <i>Desi</i>      | Ca_Desig_Scaffold00249       | 77797                          | (T/C)       |
| 31279       | CadSNP6874     | <i>Desi</i>      | Ca_Desig_Scaffold00249       | 101447                         | (A/G)       |
| 31280       | CadSNP6875     | <i>Desi</i>      | Ca_Desig_Scaffold00249       | 138319                         | (C/T)       |
| 31281       | CadSNP6876     | <i>Desi</i>      | Ca_Desig_Scaffold00249       | 157148                         | (G/C)       |
| 31282       | CadSNP6877     | <i>Desi</i>      | Ca_Desig_Scaffold00249       | 157161                         | (T/C)       |
| 31283       | CadSNP6878     | <i>Desi</i>      | Ca_Desig_Scaffold00249       | 157167                         | (T/C)       |
| 31284       | CadSNP6879     | <i>Desi</i>      | Ca_Desig_Scaffold00249       | 157176                         | (T/A)       |
| 31285       | CadSNP6880     | <i>Desi</i>      | Ca_Desig_Scaffold00249       | 157193                         | (C/T)       |
| 31286       | CadSNP6881     | <i>Desi</i>      | Ca_Desig_Scaffold00249       | 157196                         | (A/C)       |
| 31287       | CadSNP6882     | <i>Desi</i>      | Ca_Desig_Scaffold00252       | 41046                          | (T/C)       |
| 31288       | CadSNP6883     | <i>Desi</i>      | Ca_Desig_Scaffold00252       | 87593                          | (C/T)       |
| 31289       | CadSNP6884     | <i>Desi</i>      | Ca_Desig_Scaffold00252       | 102012                         | (G/T)       |
| 31290       | CadSNP6885     | <i>Desi</i>      | Ca_Desig_Scaffold00252       | 112027                         | (A/G)       |
| 31291       | CadSNP6886     | <i>Desi</i>      | Ca_Desig_Scaffold00252       | 140609                         | (T/A)       |
| 31292       | CadSNP6887     | <i>Desi</i>      | Ca_Desig_Scaffold00254       | 28286                          | (A/G)       |
| 31293       | CadSNP6888     | <i>Desi</i>      | Ca_Desig_Scaffold00254       | 28287                          | (C/T)       |
| 31294       | CadSNP6889     | <i>Desi</i>      | Ca_Desig_Scaffold00254       | 28312                          | (C/G)       |
| 31295       | CadSNP6890     | <i>Desi</i>      | Ca_Desig_Scaffold00254       | 28328                          | (A/C)       |
| 31296       | CadSNP6891     | <i>Desi</i>      | Ca_Desig_Scaffold00254       | 74545                          | (A/G)       |
| 31297       | CadSNP6892     | <i>Desi</i>      | Ca_Desig_Scaffold00254       | 74599                          | (T/G)       |
| 31298       | CadSNP6893     | <i>Desi</i>      | Ca_Desig_Scaffold00254       | 74604                          | (A/C)       |
| 31299       | CadSNP6894     | <i>Desi</i>      | Ca_Desig_Scaffold00254       | 95215                          | (G/A)       |
| 31300       | CadSNP6895     | <i>Desi</i>      | Ca_Desig_Scaffold00254       | 96479                          | (A/G)       |
| 31301       | CadSNP6896     | <i>Desi</i>      | Ca_Desig_Scaffold00254       | 154607                         | (G/T)       |
| 31302       | CadSNP6897     | <i>Desi</i>      | Ca_Desig_Scaffold00254       | 190590                         | (C/G)       |
| 31303       | CadSNP6898     | <i>Desi</i>      | Ca_Desig_Scaffold00257       | 53147                          | (T/C)       |
| 31304       | CadSNP6899     | <i>Desi</i>      | Ca_Desig_Scaffold00257       | 100146                         | (G/T)       |
| 31305       | CadSNP6900     | <i>Desi</i>      | Ca_Desig_Scaffold00257       | 100170                         | (T/G)       |
| 31306       | CadSNP6901     | <i>Desi</i>      | Ca_Desig_Scaffold00257       | 158193                         | (T/C)       |
| 31307       | CadSNP6902     | <i>Desi</i>      | Ca_Desig_Scaffold00258       | 221035                         | (G/A)       |
| 31308       | CadSNP6903     | <i>Desi</i>      | Ca_Desig_Scaffold00258       | 258872                         | (C/T)       |
| 31309       | CadSNP6904     | <i>Desi</i>      | Ca_Desig_Scaffold00259       | 40090                          | (T/G)       |
| 31310       | CadSNP6905     | <i>Desi</i>      | Ca_Desig_Scaffold00259       | 56957                          | (T/G)       |
| 31311       | CadSNP6906     | <i>Desi</i>      | Ca_Desig_Scaffold00259       | 123703                         | (A/G)       |

| <b>S.N.</b> | <b>SNP IDs</b> | <b>Cultivars</b> | <b>Chromosomes/scaffolds</b> | <b>Physical positions (bp)</b> | <b>SNPs</b> |
|-------------|----------------|------------------|------------------------------|--------------------------------|-------------|
| 31312       | CadSNP6907     | <i>Desi</i>      | Ca_Desig_Scaffold00259       | 123748                         | (G/A)       |
| 31313       | CadSNP6908     | <i>Desi</i>      | Ca_Desig_Scaffold00259       | 219474                         | (T/A)       |
| 31314       | CadSNP6909     | <i>Desi</i>      | Ca_Desig_Scaffold00261       | 45878                          | (C/T)       |
| 31315       | CadSNP6910     | <i>Desi</i>      | Ca_Desig_Scaffold00261       | 53583                          | (T/C)       |
| 31316       | CadSNP6911     | <i>Desi</i>      | Ca_Desig_Scaffold00261       | 84164                          | (C/A)       |
| 31317       | CadSNP6912     | <i>Desi</i>      | Ca_Desig_Scaffold00261       | 116113                         | (C/A)       |
| 31318       | CadSNP6913     | <i>Desi</i>      | Ca_Desig_Scaffold00261       | 164204                         | (T/G)       |
| 31319       | CadSNP6914     | <i>Desi</i>      | Ca_Desig_Scaffold00261       | 164254                         | (C/T)       |
| 31320       | CadSNP6915     | <i>Desi</i>      | Ca_Desig_Scaffold00261       | 164275                         | (T/C)       |
| 31321       | CadSNP6916     | <i>Desi</i>      | Ca_Desig_Scaffold00261       | 164287                         | (C/T)       |
| 31322       | CadSNP6917     | <i>Desi</i>      | Ca_Desig_Scaffold00261       | 164317                         | (A/G)       |
| 31323       | CadSNP6918     | <i>Desi</i>      | Ca_Desig_Scaffold00261       | 177861                         | (A/G)       |
| 31324       | CadSNP6919     | <i>Desi</i>      | Ca_Desig_Scaffold00261       | 179178                         | (T/C)       |
| 31325       | CadSNP6920     | <i>Desi</i>      | Ca_Desig_Scaffold00262       | 175648                         | (C/T)       |
| 31326       | CadSNP6921     | <i>Desi</i>      | Ca_Desig_Scaffold00262       | 186150                         | (C/A)       |
| 31327       | CadSNP6922     | <i>Desi</i>      | Ca_Desig_Scaffold00262       | 186152                         | (T/A)       |
| 31328       | CadSNP6923     | <i>Desi</i>      | Ca_Desig_Scaffold00263       | 26991                          | (T/C)       |
| 31329       | CadSNP6924     | <i>Desi</i>      | Ca_Desig_Scaffold00263       | 27022                          | (G/A)       |
| 31330       | CadSNP6925     | <i>Desi</i>      | Ca_Desig_Scaffold00263       | 76667                          | (C/A)       |
| 31331       | CadSNP6926     | <i>Desi</i>      | Ca_Desig_Scaffold00263       | 78788                          | (T/G)       |
| 31332       | CadSNP6927     | <i>Desi</i>      | Ca_Desig_Scaffold00263       | 78805                          | (T/G)       |
| 31333       | CadSNP6928     | <i>Desi</i>      | Ca_Desig_Scaffold00263       | 89407                          | (C/G)       |
| 31334       | CadSNP6929     | <i>Desi</i>      | Ca_Desig_Scaffold00263       | 98599                          | (T/C)       |
| 31335       | CadSNP6930     | <i>Desi</i>      | Ca_Desig_Scaffold00263       | 98625                          | (G/T)       |
| 31336       | CadSNP6931     | <i>Desi</i>      | Ca_Desig_Scaffold00263       | 100448                         | (T/G)       |
| 31337       | CadSNP6932     | <i>Desi</i>      | Ca_Desig_Scaffold00263       | 157397                         | (G/C)       |
| 31338       | CadSNP6933     | <i>Desi</i>      | Ca_Desig_Scaffold00263       | 159944                         | (G/C)       |
| 31339       | CadSNP6934     | <i>Desi</i>      | Ca_Desig_Scaffold00263       | 159987                         | (C/A)       |
| 31340       | CadSNP6935     | <i>Desi</i>      | Ca_Desig_Scaffold00263       | 160098                         | (T/A)       |
| 31341       | CadSNP6936     | <i>Desi</i>      | Ca_Desig_Scaffold00263       | 160119                         | (A/G)       |
| 31342       | CadSNP6937     | <i>Desi</i>      | Ca_Desig_Scaffold00263       | 160170                         | (A/G)       |
| 31343       | CadSNP6938     | <i>Desi</i>      | Ca_Desig_Scaffold00263       | 160262                         | (C/T)       |
| 31344       | CadSNP6939     | <i>Desi</i>      | Ca_Desig_Scaffold00263       | 160396                         | (T/C)       |
| 31345       | CadSNP6940     | <i>Desi</i>      | Ca_Desig_Scaffold00263       | 160444                         | (G/A)       |
| 31346       | CadSNP6941     | <i>Desi</i>      | Ca_Desig_Scaffold00263       | 160448                         | (G/A)       |
| 31347       | CadSNP6942     | <i>Desi</i>      | Ca_Desig_Scaffold00263       | 160463                         | (T/G)       |
| 31348       | CadSNP6943     | <i>Desi</i>      | Ca_Desig_Scaffold00263       | 162490                         | (A/G)       |
| 31349       | CadSNP6944     | <i>Desi</i>      | Ca_Desig_Scaffold00263       | 162643                         | (A/G)       |

| <b>S.N.</b> | <b>SNP IDs</b> | <b>Cultivars</b> | <b>Chromosomes/scaffolds</b> | <b>Physical positions (bp)</b> | <b>SNPs</b> |
|-------------|----------------|------------------|------------------------------|--------------------------------|-------------|
| 31350       | CadSNP6945     | <i>Desi</i>      | Ca_Desig_Scaffold00264       | 28070                          | (A/G)       |
| 31351       | CadSNP6946     | <i>Desi</i>      | Ca_Desig_Scaffold00266       | 100479                         | (G/T)       |
| 31352       | CadSNP6947     | <i>Desi</i>      | Ca_Desig_Scaffold00266       | 113517                         | (A/G)       |
| 31353       | CadSNP6948     | <i>Desi</i>      | Ca_Desig_Scaffold00266       | 208518                         | (T/C)       |
| 31354       | CadSNP6949     | <i>Desi</i>      | Ca_Desig_Scaffold00270       | 5550                           | (G/T)       |
| 31355       | CadSNP6950     | <i>Desi</i>      | Ca_Desig_Scaffold00270       | 63543                          | (C/T)       |
| 31356       | CadSNP6951     | <i>Desi</i>      | Ca_Desig_Scaffold00270       | 68994                          | (A/T)       |
| 31357       | CadSNP6952     | <i>Desi</i>      | Ca_Desig_Scaffold00270       | 94799                          | (A/C)       |
| 31358       | CadSNP6953     | <i>Desi</i>      | Ca_Desig_Scaffold00270       | 147873                         | (G/T)       |
| 31359       | CadSNP6954     | <i>Desi</i>      | Ca_Desig_Scaffold00270       | 154919                         | (G/A)       |
| 31360       | CadSNP6955     | <i>Desi</i>      | Ca_Desig_Scaffold00270       | 163572                         | (A/G)       |
| 31361       | CadSNP6956     | <i>Desi</i>      | Ca_Desig_Scaffold00270       | 163570                         | (G/C)       |
| 31362       | CadSNP6957     | <i>Desi</i>      | Ca_Desig_Scaffold00270       | 172247                         | (C/T)       |
| 31363       | CadSNP6958     | <i>Desi</i>      | Ca_Desig_Scaffold00270       | 208690                         | (G/A)       |
| 31364       | CadSNP6959     | <i>Desi</i>      | Ca_Desig_Scaffold00270       | 208674                         | (G/C)       |
| 31365       | CadSNP6960     | <i>Desi</i>      | Ca_Desig_Scaffold00271       | 6166                           | (G/T)       |
| 31366       | CadSNP6961     | <i>Desi</i>      | Ca_Desig_Scaffold00271       | 6101                           | (G/A)       |
| 31367       | CadSNP6962     | <i>Desi</i>      | Ca_Desig_Scaffold00271       | 33434                          | (C/T)       |
| 31368       | CadSNP6963     | <i>Desi</i>      | Ca_Desig_Scaffold00271       | 33776                          | (T/A)       |
| 31369       | CadSNP6964     | <i>Desi</i>      | Ca_Desig_Scaffold00271       | 33805                          | (C/A)       |
| 31370       | CadSNP6965     | <i>Desi</i>      | Ca_Desig_Scaffold00271       | 33830                          | (G/A)       |
| 31371       | CadSNP6966     | <i>Desi</i>      | Ca_Desig_Scaffold00271       | 58809                          | (G/A)       |
| 31372       | CadSNP6967     | <i>Desi</i>      | Ca_Desig_Scaffold00271       | 58847                          | (A/G)       |
| 31373       | CadSNP6968     | <i>Desi</i>      | Ca_Desig_Scaffold00271       | 58865                          | (G/C)       |
| 31374       | CadSNP6969     | <i>Desi</i>      | Ca_Desig_Scaffold00271       | 79326                          | (T/G)       |
| 31375       | CadSNP6970     | <i>Desi</i>      | Ca_Desig_Scaffold00271       | 79378                          | (A/T)       |
| 31376       | CadSNP6971     | <i>Desi</i>      | Ca_Desig_Scaffold00271       | 79429                          | (A/T)       |
| 31377       | CadSNP6972     | <i>Desi</i>      | Ca_Desig_Scaffold00271       | 79418                          | (A/G)       |
| 31378       | CadSNP6973     | <i>Desi</i>      | Ca_Desig_Scaffold00271       | 79414                          | (C/T)       |
| 31379       | CadSNP6974     | <i>Desi</i>      | Ca_Desig_Scaffold00271       | 85381                          | (T/C)       |
| 31380       | CadSNP6975     | <i>Desi</i>      | Ca_Desig_Scaffold00271       | 106945                         | (G/A)       |
| 31381       | CadSNP6976     | <i>Desi</i>      | Ca_Desig_Scaffold00271       | 120137                         | (T/C)       |
| 31382       | CadSNP6977     | <i>Desi</i>      | Ca_Desig_Scaffold00271       | 120327                         | (T/C)       |
| 31383       | CadSNP6978     | <i>Desi</i>      | Ca_Desig_Scaffold00271       | 120344                         | (C/T)       |
| 31384       | CadSNP6979     | <i>Desi</i>      | Ca_Desig_Scaffold00271       | 138974                         | (A/G)       |
| 31385       | CadSNP6980     | <i>Desi</i>      | Ca_Desig_Scaffold00271       | 174994                         | (A/G)       |
| 31386       | CadSNP6981     | <i>Desi</i>      | Ca_Desig_Scaffold00271       | 175021                         | (C/G)       |
| 31387       | CadSNP6982     | <i>Desi</i>      | Ca_Desig_Scaffold00271       | 183902                         | (T/C)       |

| <b>S.N.</b> | <b>SNP IDs</b> | <b>Cultivars</b> | <b>Chromosomes/scaffolds</b> | <b>Physical positions (bp)</b> | <b>SNPs</b> |
|-------------|----------------|------------------|------------------------------|--------------------------------|-------------|
| 31388       | CadSNP6983     | <i>Desi</i>      | Ca_Desig_Scaffold00271       | 183909                         | (T/A)       |
| 31389       | CadSNP6984     | <i>Desi</i>      | Ca_Desig_Scaffold00274       | 33234                          | (T/G)       |
| 31390       | CadSNP6985     | <i>Desi</i>      | Ca_Desig_Scaffold00274       | 44289                          | (C/T)       |
| 31391       | CadSNP6986     | <i>Desi</i>      | Ca_Desig_Scaffold00274       | 44311                          | (G/T)       |
| 31392       | CadSNP6987     | <i>Desi</i>      | Ca_Desig_Scaffold00274       | 44317                          | (G/A)       |
| 31393       | CadSNP6988     | <i>Desi</i>      | Ca_Desig_Scaffold00274       | 44322                          | (A/G)       |
| 31394       | CadSNP6989     | <i>Desi</i>      | Ca_Desig_Scaffold00274       | 44329                          | (A/T)       |
| 31395       | CadSNP6990     | <i>Desi</i>      | Ca_Desig_Scaffold00274       | 48754                          | (T/C)       |
| 31396       | CadSNP6991     | <i>Desi</i>      | Ca_Desig_Scaffold00274       | 48812                          | (T/G)       |
| 31397       | CadSNP6992     | <i>Desi</i>      | Ca_Desig_Scaffold00274       | 58861                          | (C/T)       |
| 31398       | CadSNP6993     | <i>Desi</i>      | Ca_Desig_Scaffold00274       | 75653                          | (C/T)       |
| 31399       | CadSNP6994     | <i>Desi</i>      | Ca_Desig_Scaffold00274       | 75729                          | (T/C)       |
| 31400       | CadSNP6995     | <i>Desi</i>      | Ca_Desig_Scaffold00274       | 114396                         | (A/G)       |
| 31401       | CadSNP6996     | <i>Desi</i>      | Ca_Desig_Scaffold00274       | 114414                         | (T/G)       |
| 31402       | CadSNP6997     | <i>Desi</i>      | Ca_Desig_Scaffold00274       | 114425                         | (G/T)       |
| 31403       | CadSNP6998     | <i>Desi</i>      | Ca_Desig_Scaffold00274       | 114458                         | (A/T)       |
| 31404       | CadSNP6999     | <i>Desi</i>      | Ca_Desig_Scaffold00274       | 122592                         | (G/A)       |
| 31405       | CadSNP7000     | <i>Desi</i>      | Ca_Desig_Scaffold00274       | 122628                         | (G/A)       |
| 31406       | CadSNP7001     | <i>Desi</i>      | Ca_Desig_Scaffold00274       | 122627                         | (T/C)       |
| 31407       | CadSNP7002     | <i>Desi</i>      | Ca_Desig_Scaffold00274       | 122620                         | (G/C)       |
| 31408       | CadSNP7003     | <i>Desi</i>      | Ca_Desig_Scaffold00274       | 122861                         | (T/C)       |
| 31409       | CadSNP7004     | <i>Desi</i>      | Ca_Desig_Scaffold00274       | 122881                         | (T/C)       |
| 31410       | CadSNP7005     | <i>Desi</i>      | Ca_Desig_Scaffold00274       | 122890                         | (A/C)       |
| 31411       | CadSNP7006     | <i>Desi</i>      | Ca_Desig_Scaffold00274       | 123078                         | (A/G)       |
| 31412       | CadSNP7007     | <i>Desi</i>      | Ca_Desig_Scaffold00274       | 154874                         | (C/A)       |
| 31413       | CadSNP7008     | <i>Desi</i>      | Ca_Desig_Scaffold00274       | 176289                         | (C/T)       |
| 31414       | CadSNP7009     | <i>Desi</i>      | Ca_Desig_Scaffold00274       | 176245                         | (T/G)       |
| 31415       | CadSNP7010     | <i>Desi</i>      | Ca_Desig_Scaffold00277       | 15144                          | (A/G)       |
| 31416       | CadSNP7011     | <i>Desi</i>      | Ca_Desig_Scaffold00277       | 40087                          | (C/T)       |
| 31417       | CadSNP7012     | <i>Desi</i>      | Ca_Desig_Scaffold00277       | 40076                          | (A/G)       |
| 31418       | CadSNP7013     | <i>Desi</i>      | Ca_Desig_Scaffold00277       | 42172                          | (G/A)       |
| 31419       | CadSNP7014     | <i>Desi</i>      | Ca_Desig_Scaffold00277       | 42165                          | (A/G)       |
| 31420       | CadSNP7015     | <i>Desi</i>      | Ca_Desig_Scaffold00277       | 91711                          | (A/T)       |
| 31421       | CadSNP7016     | <i>Desi</i>      | Ca_Desig_Scaffold00277       | 119070                         | (G/C)       |
| 31422       | CadSNP7017     | <i>Desi</i>      | Ca_Desig_Scaffold00277       | 152963                         | (C/G)       |
| 31423       | CadSNP7018     | <i>Desi</i>      | Ca_Desig_Scaffold00277       | 152967                         | (A/T)       |
| 31424       | CadSNP7019     | <i>Desi</i>      | Ca_Desig_Scaffold00277       | 187204                         | (G/A)       |
| 31425       | CadSNP7020     | <i>Desi</i>      | Ca_Desig_Scaffold00277       | 187233                         | (G/A)       |

| <b>S.N.</b> | <b>SNP IDs</b> | <b>Cultivars</b> | <b>Chromosomes/scaffolds</b> | <b>Physical positions (bp)</b> | <b>SNPs</b> |
|-------------|----------------|------------------|------------------------------|--------------------------------|-------------|
| 31426       | CadSNP7021     | <i>Desi</i>      | Ca_Desig_Scaffold00277       | 187347                         | (C/T)       |
| 31427       | CadSNP7022     | <i>Desi</i>      | Ca_Desig_Scaffold00277       | 190164                         | (G/A)       |
| 31428       | CadSNP7023     | <i>Desi</i>      | Ca_Desig_Scaffold00277       | 190105                         | (A/C)       |
| 31429       | CadSNP7024     | <i>Desi</i>      | Ca_Desig_Scaffold00277       | 192976                         | (G/A)       |
| 31430       | CadSNP7025     | <i>Desi</i>      | Ca_Desig_Scaffold00277       | 193016                         | (T/A)       |
| 31431       | CadSNP7026     | <i>Desi</i>      | Ca_Desig_Scaffold00278       | 21461                          | (T/A)       |
| 31432       | CadSNP7027     | <i>Desi</i>      | Ca_Desig_Scaffold00278       | 21460                          | (T/A)       |
| 31433       | CadSNP7028     | <i>Desi</i>      | Ca_Desig_Scaffold00278       | 21425                          | (G/T)       |
| 31434       | CadSNP7029     | <i>Desi</i>      | Ca_Desig_Scaffold00278       | 21419                          | (G/T)       |
| 31435       | CadSNP7030     | <i>Desi</i>      | Ca_Desig_Scaffold00278       | 21401                          | (C/T)       |
| 31436       | CadSNP7031     | <i>Desi</i>      | Ca_Desig_Scaffold00278       | 78945                          | (G/T)       |
| 31437       | CadSNP7032     | <i>Desi</i>      | Ca_Desig_Scaffold00278       | 79095                          | (G/T)       |
| 31438       | CadSNP7033     | <i>Desi</i>      | Ca_Desig_Scaffold00278       | 79245                          | (T/C)       |
| 31439       | CadSNP7034     | <i>Desi</i>      | Ca_Desig_Scaffold00278       | 121122                         | (C/G)       |
| 31440       | CadSNP7035     | <i>Desi</i>      | Ca_Desig_Scaffold00278       | 121234                         | (C/T)       |
| 31441       | CadSNP7036     | <i>Desi</i>      | Ca_Desig_Scaffold00278       | 121166                         | (A/G)       |
| 31442       | CadSNP7037     | <i>Desi</i>      | Ca_Desig_Scaffold00278       | 191259                         | (A/G)       |
| 31443       | CadSNP7038     | <i>Desi</i>      | Ca_Desig_Scaffold00279       | 61610                          | (T/C)       |
| 31444       | CadSNP7039     | <i>Desi</i>      | Ca_Desig_Scaffold00279       | 61609                          | (A/T)       |
| 31445       | CadSNP7040     | <i>Desi</i>      | Ca_Desig_Scaffold00279       | 61608                          | (G/T)       |
| 31446       | CadSNP7041     | <i>Desi</i>      | Ca_Desig_Scaffold00279       | 64020                          | (T/C)       |
| 31447       | CadSNP7042     | <i>Desi</i>      | Ca_Desig_Scaffold00279       | 96459                          | (A/G)       |
| 31448       | CadSNP7043     | <i>Desi</i>      | Ca_Desig_Scaffold00279       | 97267                          | (A/C)       |
| 31449       | CadSNP7044     | <i>Desi</i>      | Ca_Desig_Scaffold00279       | 137687                         | (C/A)       |
| 31450       | CadSNP7045     | <i>Desi</i>      | Ca_Desig_Scaffold00279       | 137688                         | (G/T)       |
| 31451       | CadSNP7046     | <i>Desi</i>      | Ca_Desig_Scaffold00279       | 143739                         | (T/C)       |
| 31452       | CadSNP7047     | <i>Desi</i>      | Ca_Desig_Scaffold00279       | 144573                         | (G/C)       |
| 31453       | CadSNP7048     | <i>Desi</i>      | Ca_Desig_Scaffold00286       | 3202                           | (C/G)       |
| 31454       | CadSNP7049     | <i>Desi</i>      | Ca_Desig_Scaffold00286       | 43871                          | (G/T)       |
| 31455       | CadSNP7050     | <i>Desi</i>      | Ca_Desig_Scaffold00286       | 56934                          | (C/T)       |
| 31456       | CadSNP7051     | <i>Desi</i>      | Ca_Desig_Scaffold00286       | 57243                          | (T/C)       |
| 31457       | CadSNP7052     | <i>Desi</i>      | Ca_Desig_Scaffold00286       | 84666                          | (T/G)       |
| 31458       | CadSNP7053     | <i>Desi</i>      | Ca_Desig_Scaffold00286       | 84723                          | (C/T)       |
| 31459       | CadSNP7054     | <i>Desi</i>      | Ca_Desig_Scaffold00286       | 90475                          | (C/T)       |
| 31460       | CadSNP7055     | <i>Desi</i>      | Ca_Desig_Scaffold00286       | 91290                          | (C/T)       |
| 31461       | CadSNP7056     | <i>Desi</i>      | Ca_Desig_Scaffold00286       | 91293                          | (T/A)       |
| 31462       | CadSNP7057     | <i>Desi</i>      | Ca_Desig_Scaffold00286       | 104275                         | (A/G)       |
| 31463       | CadSNP7058     | <i>Desi</i>      | Ca_Desig_Scaffold00286       | 104310                         | (T/C)       |

| <b>S.N.</b> | <b>SNP IDs</b> | <b>Cultivars</b> | <b>Chromosomes/scaffolds</b> | <b>Physical positions (bp)</b> | <b>SNPs</b> |
|-------------|----------------|------------------|------------------------------|--------------------------------|-------------|
| 31464       | CadSNP7059     | <i>Desi</i>      | Ca_Desig_Scaffold00286       | 125674                         | (T/G)       |
| 31465       | CadSNP7060     | <i>Desi</i>      | Ca_Desig_Scaffold00286       | 125703                         | (A/T)       |
| 31466       | CadSNP7061     | <i>Desi</i>      | Ca_Desig_Scaffold00286       | 126056                         | (G/A)       |
| 31467       | CadSNP7062     | <i>Desi</i>      | Ca_Desig_Scaffold00286       | 136145                         | (C/A)       |
| 31468       | CadSNP7063     | <i>Desi</i>      | Ca_Desig_Scaffold00286       | 138260                         | (C/G)       |
| 31469       | CadSNP7064     | <i>Desi</i>      | Ca_Desig_Scaffold00286       | 138290                         | (T/A)       |
| 31470       | CadSNP7065     | <i>Desi</i>      | Ca_Desig_Scaffold00286       | 141164                         | (C/G)       |
| 31471       | CadSNP7066     | <i>Desi</i>      | Ca_Desig_Scaffold00286       | 144303                         | (G/A)       |
| 31472       | CadSNP7067     | <i>Desi</i>      | Ca_Desig_Scaffold00286       | 147990                         | (A/G)       |
| 31473       | CadSNP7068     | <i>Desi</i>      | Ca_Desig_Scaffold00286       | 164112                         | (G/T)       |
| 31474       | CadSNP7069     | <i>Desi</i>      | Ca_Desig_Scaffold00286       | 187422                         | (C/T)       |
| 31475       | CadSNP7070     | <i>Desi</i>      | Ca_Desig_Scaffold00288       | 68733                          | (C/A)       |
| 31476       | CadSNP7071     | <i>Desi</i>      | Ca_Desig_Scaffold00288       | 134211                         | (A/G)       |
| 31477       | CadSNP7072     | <i>Desi</i>      | Ca_Desig_Scaffold00288       | 152951                         | (G/A)       |
| 31478       | CadSNP7073     | <i>Desi</i>      | Ca_Desig_Scaffold00289       | 66004                          | (T/G)       |
| 31479       | CadSNP7074     | <i>Desi</i>      | Ca_Desig_Scaffold00289       | 134646                         | (G/A)       |
| 31480       | CadSNP7075     | <i>Desi</i>      | Ca_Desig_Scaffold00289       | 134684                         | (T/C)       |
| 31481       | CadSNP7076     | <i>Desi</i>      | Ca_Desig_Scaffold00289       | 134694                         | (A/G)       |
| 31482       | CadSNP7077     | <i>Desi</i>      | Ca_Desig_Scaffold00289       | 134711                         | (C/G)       |
| 31483       | CadSNP7078     | <i>Desi</i>      | Ca_Desig_Scaffold00289       | 134761                         | (G/A)       |
| 31484       | CadSNP7079     | <i>Desi</i>      | Ca_Desig_Scaffold00289       | 134750                         | (G/T)       |
| 31485       | CadSNP7080     | <i>Desi</i>      | Ca_Desig_Scaffold00289       | 134739                         | (C/T)       |
| 31486       | CadSNP7081     | <i>Desi</i>      | Ca_Desig_Scaffold00289       | 134705                         | (G/A)       |
| 31487       | CadSNP7082     | <i>Desi</i>      | Ca_Desig_Scaffold00289       | 150531                         | (A/G)       |
| 31488       | CadSNP7083     | <i>Desi</i>      | Ca_Desig_Scaffold00289       | 150541                         | (C/T)       |
| 31489       | CadSNP7084     | <i>Desi</i>      | Ca_Desig_Scaffold00289       | 150542                         | (A/G)       |
| 31490       | CadSNP7085     | <i>Desi</i>      | Ca_Desig_Scaffold00289       | 150550                         | (G/T)       |
| 31491       | CadSNP7086     | <i>Desi</i>      | Ca_Desig_Scaffold00289       | 150585                         | (A/G)       |
| 31492       | CadSNP7087     | <i>Desi</i>      | Ca_Desig_Scaffold00289       | 150586                         | (C/T)       |
| 31493       | CadSNP7088     | <i>Desi</i>      | Ca_Desig_Scaffold00289       | 150537                         | (G/A)       |
| 31494       | CadSNP7089     | <i>Desi</i>      | Ca_Desig_Scaffold00289       | 150662                         | (A/G)       |
| 31495       | CadSNP7090     | <i>Desi</i>      | Ca_Desig_Scaffold00289       | 150659                         | (T/C)       |
| 31496       | CadSNP7091     | <i>Desi</i>      | Ca_Desig_Scaffold00289       | 150645                         | (T/G)       |
| 31497       | CadSNP7092     | <i>Desi</i>      | Ca_Desig_Scaffold00289       | 150609                         | (C/A)       |
| 31498       | CadSNP7093     | <i>Desi</i>      | Ca_Desig_Scaffold00289       | 205261                         | (G/A)       |
| 31499       | CadSNP7094     | <i>Desi</i>      | Ca_Desig_Scaffold00289       | 205258                         | (T/A)       |
| 31500       | CadSNP7095     | <i>Desi</i>      | Ca_Desig_Scaffold00290       | 67803                          | (C/T)       |
| 31501       | CadSNP7096     | <i>Desi</i>      | Ca_Desig_Scaffold00290       | 67853                          | (A/C)       |

| <b>S.N.</b> | <b>SNP IDs</b> | <b>Cultivars</b> | <b>Chromosomes/scaffolds</b> | <b>Physical positions (bp)</b> | <b>SNPs</b> |
|-------------|----------------|------------------|------------------------------|--------------------------------|-------------|
| 31502       | CadSNP7097     | <i>Desi</i>      | Ca_Desig_Scaffold00290       | 116297                         | (G/C)       |
| 31503       | CadSNP7098     | <i>Desi</i>      | Ca_Desig_Scaffold00290       | 141764                         | (G/T)       |
| 31504       | CadSNP7099     | <i>Desi</i>      | Ca_Desig_Scaffold00290       | 141847                         | (A/T)       |
| 31505       | CadSNP7100     | <i>Desi</i>      | Ca_Desig_Scaffold00290       | 171714                         | (T/C)       |
| 31506       | CadSNP7101     | <i>Desi</i>      | Ca_Desig_Scaffold00292       | 23800                          | (A/C)       |
| 31507       | CadSNP7102     | <i>Desi</i>      | Ca_Desig_Scaffold00292       | 43555                          | (C/G)       |
| 31508       | CadSNP7103     | <i>Desi</i>      | Ca_Desig_Scaffold00292       | 46659                          | (T/G)       |
| 31509       | CadSNP7104     | <i>Desi</i>      | Ca_Desig_Scaffold00292       | 46710                          | (T/C)       |
| 31510       | CadSNP7105     | <i>Desi</i>      | Ca_Desig_Scaffold00295       | 80498                          | (A/T)       |
| 31511       | CadSNP7106     | <i>Desi</i>      | Ca_Desig_Scaffold00295       | 80480                          | (C/T)       |
| 31512       | CadSNP7107     | <i>Desi</i>      | Ca_Desig_Scaffold00295       | 125683                         | (T/C)       |
| 31513       | CadSNP7108     | <i>Desi</i>      | Ca_Desig_Scaffold00295       | 130743                         | (T/C)       |
| 31514       | CadSNP7109     | <i>Desi</i>      | Ca_Desig_Scaffold00296       | 83381                          | (T/C)       |
| 31515       | CadSNP7110     | <i>Desi</i>      | Ca_Desig_Scaffold00296       | 119255                         | (T/A)       |
| 31516       | CadSNP7111     | <i>Desi</i>      | Ca_Desig_Scaffold00296       | 119952                         | (A/G)       |
| 31517       | CadSNP7112     | <i>Desi</i>      | Ca_Desig_Scaffold00296       | 199528                         | (A/G)       |
| 31518       | CadSNP7113     | <i>Desi</i>      | Ca_Desig_Scaffold00296       | 199516                         | (G/A)       |
| 31519       | CadSNP7114     | <i>Desi</i>      | Ca_Desig_Scaffold00297       | 9265                           | (C/G)       |
| 31520       | CadSNP7115     | <i>Desi</i>      | Ca_Desig_Scaffold00297       | 9384                           | (A/C)       |
| 31521       | CadSNP7116     | <i>Desi</i>      | Ca_Desig_Scaffold00297       | 9358                           | (T/A)       |
| 31522       | CadSNP7117     | <i>Desi</i>      | Ca_Desig_Scaffold00297       | 108526                         | (T/C)       |
| 31523       | CadSNP7118     | <i>Desi</i>      | Ca_Desig_Scaffold00297       | 124175                         | (T/A)       |
| 31524       | CadSNP7119     | <i>Desi</i>      | Ca_Desig_Scaffold00297       | 138772                         | (C/A)       |
| 31525       | CadSNP7120     | <i>Desi</i>      | Ca_Desig_Scaffold00297       | 138766                         | (G/C)       |
| 31526       | CadSNP7121     | <i>Desi</i>      | Ca_Desig_Scaffold00301       | 99080                          | (C/T)       |
| 31527       | CadSNP7122     | <i>Desi</i>      | Ca_Desig_Scaffold00301       | 103180                         | (A/T)       |
| 31528       | CadSNP7123     | <i>Desi</i>      | Ca_Desig_Scaffold00301       | 158332                         | (A/T)       |
| 31529       | CadSNP7124     | <i>Desi</i>      | Ca_Desig_Scaffold00301       | 158362                         | (C/A)       |
| 31530       | CadSNP7125     | <i>Desi</i>      | Ca_Desig_Scaffold00301       | 162077                         | (T/G)       |
| 31531       | CadSNP7126     | <i>Desi</i>      | Ca_Desig_Scaffold00304       | 112110                         | (T/A)       |
| 31532       | CadSNP7127     | <i>Desi</i>      | Ca_Desig_Scaffold00304       | 112106                         | (T/A)       |
| 31533       | CadSNP7128     | <i>Desi</i>      | Ca_Desig_Scaffold00304       | 112104                         | (G/A)       |
| 31534       | CadSNP7129     | <i>Desi</i>      | Ca_Desig_Scaffold00304       | 112102                         | (T/A)       |
| 31535       | CadSNP7130     | <i>Desi</i>      | Ca_Desig_Scaffold00304       | 112094                         | (T/A)       |
| 31536       | CadSNP7131     | <i>Desi</i>      | Ca_Desig_Scaffold00305       | 1297                           | (T/G)       |
| 31537       | CadSNP7132     | <i>Desi</i>      | Ca_Desig_Scaffold00305       | 36564                          | (C/A)       |
| 31538       | CadSNP7133     | <i>Desi</i>      | Ca_Desig_Scaffold00305       | 119202                         | (C/A)       |
| 31539       | CadSNP7134     | <i>Desi</i>      | Ca_Desig_Scaffold00305       | 139907                         | (A/T)       |



| <b>S.N.</b> | <b>SNP IDs</b> | <b>Cultivars</b> | <b>Chromosomes/scaffolds</b> | <b>Physical positions (bp)</b> | <b>SNPs</b> |
|-------------|----------------|------------------|------------------------------|--------------------------------|-------------|
| 31540       | CadSNP7135     | <i>Desi</i>      | Ca_Desig_Scaffold00305       | 160707                         | (T/C)       |
| 31541       | CadSNP7136     | <i>Desi</i>      | Ca_Desig_Scaffold00308       | 87613                          | (T/G)       |
| 31542       | CadSNP7137     | <i>Desi</i>      | Ca_Desig_Scaffold00308       | 87609                          | (T/C)       |
| 31543       | CadSNP7138     | <i>Desi</i>      | Ca_Desig_Scaffold00308       | 87577                          | (C/T)       |
| 31544       | CadSNP7139     | <i>Desi</i>      | Ca_Desig_Scaffold00308       | 132713                         | (C/T)       |
| 31545       | CadSNP7140     | <i>Desi</i>      | Ca_Desig_Scaffold00308       | 132738                         | (G/A)       |
| 31546       | CadSNP7141     | <i>Desi</i>      | Ca_Desig_Scaffold00308       | 172139                         | (T/A)       |
| 31547       | CadSNP7142     | <i>Desi</i>      | Ca_Desig_Scaffold00308       | 172154                         | (A/G)       |
| 31548       | CadSNP7143     | <i>Desi</i>      | Ca_Desig_Scaffold00310       | 49502                          | (C/G)       |
| 31549       | CadSNP7144     | <i>Desi</i>      | Ca_Desig_Scaffold00310       | 69242                          | (C/T)       |
| 31550       | CadSNP7145     | <i>Desi</i>      | Ca_Desig_Scaffold00312       | 9329                           | (A/C)       |
| 31551       | CadSNP7146     | <i>Desi</i>      | Ca_Desig_Scaffold00312       | 28675                          | (G/A)       |
| 31552       | CadSNP7147     | <i>Desi</i>      | Ca_Desig_Scaffold00312       | 73884                          | (G/T)       |
| 31553       | CadSNP7148     | <i>Desi</i>      | Ca_Desig_Scaffold00312       | 75840                          | (T/A)       |
| 31554       | CadSNP7149     | <i>Desi</i>      | Ca_Desig_Scaffold00312       | 75953                          | (G/A)       |
| 31555       | CadSNP7150     | <i>Desi</i>      | Ca_Desig_Scaffold00312       | 75914                          | (T/C)       |
| 31556       | CadSNP7151     | <i>Desi</i>      | Ca_Desig_Scaffold00316       | 167890                         | (T/C)       |
| 31557       | CadSNP7152     | <i>Desi</i>      | Ca_Desig_Scaffold00321       | 12524                          | (G/A)       |
| 31558       | CadSNP7153     | <i>Desi</i>      | Ca_Desig_Scaffold00321       | 12503                          | (A/T)       |
| 31559       | CadSNP7154     | <i>Desi</i>      | Ca_Desig_Scaffold00321       | 12494                          | (T/A)       |
| 31560       | CadSNP7155     | <i>Desi</i>      | Ca_Desig_Scaffold00321       | 12491                          | (G/A)       |
| 31561       | CadSNP7156     | <i>Desi</i>      | Ca_Desig_Scaffold00321       | 12488                          | (T/C)       |
| 31562       | CadSNP7157     | <i>Desi</i>      | Ca_Desig_Scaffold00321       | 12479                          | (C/T)       |
| 31563       | CadSNP7158     | <i>Desi</i>      | Ca_Desig_Scaffold00321       | 143277                         | (T/A)       |
| 31564       | CadSNP7159     | <i>Desi</i>      | Ca_Desig_Scaffold00321       | 143279                         | (A/T)       |
| 31565       | CadSNP7160     | <i>Desi</i>      | Ca_Desig_Scaffold00321       | 172704                         | (T/C)       |
| 31566       | CadSNP7161     | <i>Desi</i>      | Ca_Desig_Scaffold00322       | 31592                          | (A/G)       |
| 31567       | CadSNP7162     | <i>Desi</i>      | Ca_Desig_Scaffold00322       | 53504                          | (A/T)       |
| 31568       | CadSNP7163     | <i>Desi</i>      | Ca_Desig_Scaffold00322       | 53506                          | (A/C)       |
| 31569       | CadSNP7164     | <i>Desi</i>      | Ca_Desig_Scaffold00322       | 55367                          | (C/T)       |
| 31570       | CadSNP7165     | <i>Desi</i>      | Ca_Desig_Scaffold00322       | 55353                          | (A/G)       |
| 31571       | CadSNP7166     | <i>Desi</i>      | Ca_Desig_Scaffold00322       | 116959                         | (A/G)       |
| 31572       | CadSNP7167     | <i>Desi</i>      | Ca_Desig_Scaffold00322       | 117158                         | (T/C)       |
| 31573       | CadSNP7168     | <i>Desi</i>      | Ca_Desig_Scaffold00322       | 127651                         | (G/C)       |
| 31574       | CadSNP7169     | <i>Desi</i>      | Ca_Desig_Scaffold00327       | 36340                          | (T/C)       |
| 31575       | CadSNP7170     | <i>Desi</i>      | Ca_Desig_Scaffold00327       | 40957                          | (C/G)       |
| 31576       | CadSNP7171     | <i>Desi</i>      | Ca_Desig_Scaffold00327       | 40954                          | (A/C)       |
| 31577       | CadSNP7172     | <i>Desi</i>      | Ca_Desig_Scaffold00327       | 40920                          | (A/C)       |

| <b>S.N.</b> | <b>SNP IDs</b> | <b>Cultivars</b> | <b>Chromosomes/scaffolds</b> | <b>Physical positions (bp)</b> | <b>SNPs</b> |
|-------------|----------------|------------------|------------------------------|--------------------------------|-------------|
| 31578       | CadSNP7173     | <i>Desi</i>      | Ca_Desig_Scaffold00327       | 103495                         | (T/C)       |
| 31579       | CadSNP7174     | <i>Desi</i>      | Ca_Desig_Scaffold00327       | 106782                         | (A/G)       |
| 31580       | CadSNP7175     | <i>Desi</i>      | Ca_Desig_Scaffold00327       | 109849                         | (T/G)       |
| 31581       | CadSNP7176     | <i>Desi</i>      | Ca_Desig_Scaffold00330       | 3079                           | (G/T)       |
| 31582       | CadSNP7177     | <i>Desi</i>      | Ca_Desig_Scaffold00330       | 31224                          | (T/C)       |
| 31583       | CadSNP7178     | <i>Desi</i>      | Ca_Desig_Scaffold00330       | 31254                          | (C/T)       |
| 31584       | CadSNP7179     | <i>Desi</i>      | Ca_Desig_Scaffold00330       | 31266                          | (G/A)       |
| 31585       | CadSNP7180     | <i>Desi</i>      | Ca_Desig_Scaffold00330       | 40441                          | (A/C)       |
| 31586       | CadSNP7181     | <i>Desi</i>      | Ca_Desig_Scaffold00331       | 19292                          | (T/C)       |
| 31587       | CadSNP7182     | <i>Desi</i>      | Ca_Desig_Scaffold00331       | 19468                          | (A/G)       |
| 31588       | CadSNP7183     | <i>Desi</i>      | Ca_Desig_Scaffold00331       | 19436                          | (T/A)       |
| 31589       | CadSNP7184     | <i>Desi</i>      | Ca_Desig_Scaffold00331       | 47775                          | (T/A)       |
| 31590       | CadSNP7185     | <i>Desi</i>      | Ca_Desig_Scaffold00331       | 47809                          | (C/A)       |
| 31591       | CadSNP7186     | <i>Desi</i>      | Ca_Desig_Scaffold00331       | 47816                          | (G/A)       |
| 31592       | CadSNP7187     | <i>Desi</i>      | Ca_Desig_Scaffold00331       | 47847                          | (A/G)       |
| 31593       | CadSNP7188     | <i>Desi</i>      | Ca_Desig_Scaffold00331       | 52221                          | (G/A)       |
| 31594       | CadSNP7189     | <i>Desi</i>      | Ca_Desig_Scaffold00331       | 52249                          | (T/A)       |
| 31595       | CadSNP7190     | <i>Desi</i>      | Ca_Desig_Scaffold00331       | 52242                          | (A/T)       |
| 31596       | CadSNP7191     | <i>Desi</i>      | Ca_Desig_Scaffold00331       | 52238                          | (C/A)       |
| 31597       | CadSNP7192     | <i>Desi</i>      | Ca_Desig_Scaffold00331       | 53189                          | (A/G)       |
| 31598       | CadSNP7193     | <i>Desi</i>      | Ca_Desig_Scaffold00331       | 97218                          | (T/C)       |
| 31599       | CadSNP7194     | <i>Desi</i>      | Ca_Desig_Scaffold00331       | 97359                          | (A/C)       |
| 31600       | CadSNP7195     | <i>Desi</i>      | Ca_Desig_Scaffold00331       | 97386                          | (C/G)       |
| 31601       | CadSNP7196     | <i>Desi</i>      | Ca_Desig_Scaffold00331       | 97451                          | (T/C)       |
| 31602       | CadSNP7197     | <i>Desi</i>      | Ca_Desig_Scaffold00331       | 97478                          | (C/T)       |
| 31603       | CadSNP7198     | <i>Desi</i>      | Ca_Desig_Scaffold00331       | 97468                          | (T/C)       |
| 31604       | CadSNP7199     | <i>Desi</i>      | Ca_Desig_Scaffold00331       | 108675                         | (C/A)       |
| 31605       | CadSNP7200     | <i>Desi</i>      | Ca_Desig_Scaffold00331       | 108699                         | (C/T)       |
| 31606       | CadSNP7201     | <i>Desi</i>      | Ca_Desig_Scaffold00331       | 108727                         | (A/T)       |
| 31607       | CadSNP7202     | <i>Desi</i>      | Ca_Desig_Scaffold00331       | 108758                         | (C/T)       |
| 31608       | CadSNP7203     | <i>Desi</i>      | Ca_Desig_Scaffold00331       | 116816                         | (G/A)       |
| 31609       | CadSNP7204     | <i>Desi</i>      | Ca_Desig_Scaffold00331       | 116856                         | (C/T)       |
| 31610       | CadSNP7205     | <i>Desi</i>      | Ca_Desig_Scaffold00331       | 123132                         | (G/A)       |
| 31611       | CadSNP7206     | <i>Desi</i>      | Ca_Desig_Scaffold00331       | 181554                         | (A/C)       |
| 31612       | CadSNP7207     | <i>Desi</i>      | Ca_Desig_Scaffold00331       | 181674                         | (A/T)       |
| 31613       | CadSNP7208     | <i>Desi</i>      | Ca_Desig_Scaffold00331       | 181656                         | (C/T)       |
| 31614       | CadSNP7209     | <i>Desi</i>      | Ca_Desig_Scaffold00331       | 181642                         | (T/C)       |
| 31615       | CadSNP7210     | <i>Desi</i>      | Ca_Desig_Scaffold00331       | 184588                         | (C/G)       |

| <b>S.N.</b> | <b>SNP IDs</b> | <b>Cultivars</b> | <b>Chromosomes/scaffolds</b> | <b>Physical positions (bp)</b> | <b>SNPs</b> |
|-------------|----------------|------------------|------------------------------|--------------------------------|-------------|
| 31616       | CadSNP7211     | <i>Desi</i>      | Ca_Desig_Scaffold00331       | 184540                         | (A/G)       |
| 31617       | CadSNP7212     | <i>Desi</i>      | Ca_Desig_Scaffold00331       | 184681                         | (C/A)       |
| 31618       | CadSNP7213     | <i>Desi</i>      | Ca_Desig_Scaffold00331       | 184677                         | (C/A)       |
| 31619       | CadSNP7214     | <i>Desi</i>      | Ca_Desig_Scaffold00331       | 185387                         | (A/G)       |
| 31620       | CadSNP7215     | <i>Desi</i>      | Ca_Desig_Scaffold00332       | 11750                          | (C/T)       |
| 31621       | CadSNP7216     | <i>Desi</i>      | Ca_Desig_Scaffold00332       | 25824                          | (C/T)       |
| 31622       | CadSNP7217     | <i>Desi</i>      | Ca_Desig_Scaffold00332       | 25826                          | (T/G)       |
| 31623       | CadSNP7218     | <i>Desi</i>      | Ca_Desig_Scaffold00332       | 25827                          | (A/G)       |
| 31624       | CadSNP7219     | <i>Desi</i>      | Ca_Desig_Scaffold00332       | 25851                          | (C/T)       |
| 31625       | CadSNP7220     | <i>Desi</i>      | Ca_Desig_Scaffold00332       | 25881                          | (A/C)       |
| 31626       | CadSNP7221     | <i>Desi</i>      | Ca_Desig_Scaffold00332       | 50967                          | (G/A)       |
| 31627       | CadSNP7222     | <i>Desi</i>      | Ca_Desig_Scaffold00332       | 96242                          | (T/C)       |
| 31628       | CadSNP7223     | <i>Desi</i>      | Ca_Desig_Scaffold00332       | 96927                          | (C/G)       |
| 31629       | CadSNP7224     | <i>Desi</i>      | Ca_Desig_Scaffold00332       | 135120                         | (C/T)       |
| 31630       | CadSNP7225     | <i>Desi</i>      | Ca_Desig_Scaffold00332       | 186674                         | (T/C)       |
| 31631       | CadSNP7226     | <i>Desi</i>      | Ca_Desig_Scaffold00332       | 186649                         | (G/A)       |
| 31632       | CadSNP7227     | <i>Desi</i>      | Ca_Desig_Scaffold00332       | 193268                         | (C/T)       |
| 31633       | CadSNP7228     | <i>Desi</i>      | Ca_Desig_Scaffold00332       | 193755                         | (A/G)       |
| 31634       | CadSNP7229     | <i>Desi</i>      | Ca_Desig_Scaffold00332       | 194005                         | (G/A)       |
| 31635       | CadSNP7230     | <i>Desi</i>      | Ca_Desig_Scaffold00333       | 42214                          | (C/A)       |
| 31636       | CadSNP7231     | <i>Desi</i>      | Ca_Desig_Scaffold00333       | 42166                          | (G/A)       |
| 31637       | CadSNP7232     | <i>Desi</i>      | Ca_Desig_Scaffold00333       | 42154                          | (T/A)       |
| 31638       | CadSNP7233     | <i>Desi</i>      | Ca_Desig_Scaffold00333       | 65986                          | (C/A)       |
| 31639       | CadSNP7234     | <i>Desi</i>      | Ca_Desig_Scaffold00333       | 113028                         | (A/G)       |
| 31640       | CadSNP7235     | <i>Desi</i>      | Ca_Desig_Scaffold00333       | 113020                         | (T/C)       |
| 31641       | CadSNP7236     | <i>Desi</i>      | Ca_Desig_Scaffold00333       | 113008                         | (A/G)       |
| 31642       | CadSNP7237     | <i>Desi</i>      | Ca_Desig_Scaffold00333       | 113002                         | (C/T)       |
| 31643       | CadSNP7238     | <i>Desi</i>      | Ca_Desig_Scaffold00333       | 113706                         | (G/A)       |
| 31644       | CadSNP7239     | <i>Desi</i>      | Ca_Desig_Scaffold00333       | 147519                         | (C/T)       |
| 31645       | CadSNP7240     | <i>Desi</i>      | Ca_Desig_Scaffold00333       | 155480                         | (A/G)       |
| 31646       | CadSNP7241     | <i>Desi</i>      | Ca_Desig_Scaffold00333       | 206254                         | (C/T)       |
| 31647       | CadSNP7242     | <i>Desi</i>      | Ca_Desig_Scaffold00337       | 7567                           | (A/G)       |
| 31648       | CadSNP7243     | <i>Desi</i>      | Ca_Desig_Scaffold00337       | 37674                          | (C/G)       |
| 31649       | CadSNP7244     | <i>Desi</i>      | Ca_Desig_Scaffold00337       | 43943                          | (T/C)       |
| 31650       | CadSNP7245     | <i>Desi</i>      | Ca_Desig_Scaffold00337       | 43932                          | (C/A)       |
| 31651       | CadSNP7246     | <i>Desi</i>      | Ca_Desig_Scaffold00337       | 43903                          | (G/A)       |
| 31652       | CadSNP7247     | <i>Desi</i>      | Ca_Desig_Scaffold00337       | 74640                          | (A/T)       |
| 31653       | CadSNP7248     | <i>Desi</i>      | Ca_Desig_Scaffold00337       | 87669                          | (G/A)       |

| <b>S.N.</b> | <b>SNP IDs</b> | <b>Cultivars</b> | <b>Chromosomes/scaffolds</b> | <b>Physical positions (bp)</b> | <b>SNPs</b> |
|-------------|----------------|------------------|------------------------------|--------------------------------|-------------|
| 31654       | CadSNP7249     | <i>Desi</i>      | Ca_Desig_Scaffold00337       | 88198                          | (G/T)       |
| 31655       | CadSNP7250     | <i>Desi</i>      | Ca_Desig_Scaffold00337       | 88249                          | (A/T)       |
| 31656       | CadSNP7251     | <i>Desi</i>      | Ca_Desig_Scaffold00337       | 88873                          | (A/C)       |
| 31657       | CadSNP7252     | <i>Desi</i>      | Ca_Desig_Scaffold00337       | 88915                          | (C/G)       |
| 31658       | CadSNP7253     | <i>Desi</i>      | Ca_Desig_Scaffold00337       | 123527                         | (A/G)       |
| 31659       | CadSNP7254     | <i>Desi</i>      | Ca_Desig_Scaffold00337       | 166816                         | (A/G)       |
| 31660       | CadSNP7255     | <i>Desi</i>      | Ca_Desig_Scaffold00341       | 32650                          | (T/C)       |
| 31661       | CadSNP7256     | <i>Desi</i>      | Ca_Desig_Scaffold00341       | 32644                          | (A/C)       |
| 31662       | CadSNP7257     | <i>Desi</i>      | Ca_Desig_Scaffold00341       | 48788                          | (A/C)       |
| 31663       | CadSNP7258     | <i>Desi</i>      | Ca_Desig_Scaffold00341       | 78049                          | (A/G)       |
| 31664       | CadSNP7259     | <i>Desi</i>      | Ca_Desig_Scaffold00341       | 184292                         | (A/C)       |
| 31665       | CadSNP7260     | <i>Desi</i>      | Ca_Desig_Scaffold00341       | 184295                         | (T/G)       |
| 31666       | CadSNP7261     | <i>Desi</i>      | Ca_Desig_Scaffold00341       | 184401                         | (G/A)       |
| 31667       | CadSNP7262     | <i>Desi</i>      | Ca_Desig_Scaffold00342       | 2395                           | (A/C)       |
| 31668       | CadSNP7263     | <i>Desi</i>      | Ca_Desig_Scaffold00342       | 2427                           | (A/G)       |
| 31669       | CadSNP7264     | <i>Desi</i>      | Ca_Desig_Scaffold00342       | 88069                          | (A/G)       |
| 31670       | CadSNP7265     | <i>Desi</i>      | Ca_Desig_Scaffold00342       | 91800                          | (G/A)       |
| 31671       | CadSNP7266     | <i>Desi</i>      | Ca_Desig_Scaffold00343       | 50014                          | (A/G)       |
| 31672       | CadSNP7267     | <i>Desi</i>      | Ca_Desig_Scaffold00343       | 71188                          | (T/C)       |
| 31673       | CadSNP7268     | <i>Desi</i>      | Ca_Desig_Scaffold00348       | 21634                          | (C/A)       |
| 31674       | CadSNP7269     | <i>Desi</i>      | Ca_Desig_Scaffold00348       | 162199                         | (T/A)       |
| 31675       | CadSNP7270     | <i>Desi</i>      | Ca_Desig_Scaffold00348       | 162170                         | (C/A)       |
| 31676       | CadSNP7271     | <i>Desi</i>      | Ca_Desig_Scaffold00351       | 37573                          | (T/A)       |
| 31677       | CadSNP7272     | <i>Desi</i>      | Ca_Desig_Scaffold00351       | 37596                          | (C/T)       |
| 31678       | CadSNP7273     | <i>Desi</i>      | Ca_Desig_Scaffold00351       | 37590                          | (C/T)       |
| 31679       | CadSNP7274     | <i>Desi</i>      | Ca_Desig_Scaffold00351       | 37607                          | (C/T)       |
| 31680       | CadSNP7275     | <i>Desi</i>      | Ca_Desig_Scaffold00352       | 71652                          | (G/A)       |
| 31681       | CadSNP7276     | <i>Desi</i>      | Ca_Desig_Scaffold00352       | 91763                          | (G/C)       |
| 31682       | CadSNP7277     | <i>Desi</i>      | Ca_Desig_Scaffold00352       | 91743                          | (G/A)       |
| 31683       | CadSNP7278     | <i>Desi</i>      | Ca_Desig_Scaffold00352       | 105957                         | (A/G)       |
| 31684       | CadSNP7279     | <i>Desi</i>      | Ca_Desig_Scaffold00352       | 156459                         | (G/T)       |
| 31685       | CadSNP7280     | <i>Desi</i>      | Ca_Desig_Scaffold00352       | 178618                         | (T/A)       |
| 31686       | CadSNP7281     | <i>Desi</i>      | Ca_Desig_Scaffold00352       | 178620                         | (C/T)       |
| 31687       | CadSNP7282     | <i>Desi</i>      | Ca_Desig_Scaffold00352       | 186533                         | (A/C)       |
| 31688       | CadSNP7283     | <i>Desi</i>      | Ca_Desig_Scaffold00352       | 186527                         | (G/C)       |
| 31689       | CadSNP7284     | <i>Desi</i>      | Ca_Desig_Scaffold00352       | 186525                         | (T/C)       |
| 31690       | CadSNP7285     | <i>Desi</i>      | Ca_Desig_Scaffold00356       | 31464                          | (A/T)       |
| 31691       | CadSNP7286     | <i>Desi</i>      | Ca_Desig_Scaffold00356       | 176441                         | (T/G)       |

| <b>S.N.</b> | <b>SNP IDs</b> | <b>Cultivars</b> | <b>Chromosomes/scaffolds</b> | <b>Physical positions (bp)</b> | <b>SNPs</b> |
|-------------|----------------|------------------|------------------------------|--------------------------------|-------------|
| 31692       | CadSNP7287     | <i>Desi</i>      | Ca_Desig_Scaffold00356       | 176440                         | (G/A)       |
| 31693       | CadSNP7288     | <i>Desi</i>      | Ca_Desig_Scaffold00356       | 176439                         | (G/A)       |
| 31694       | CadSNP7289     | <i>Desi</i>      | Ca_Desig_Scaffold00356       | 176434                         | (C/A)       |
| 31695       | CadSNP7290     | <i>Desi</i>      | Ca_Desig_Scaffold00356       | 176433                         | (C/A)       |
| 31696       | CadSNP7291     | <i>Desi</i>      | Ca_Desig_Scaffold00356       | 176432                         | (G/C)       |
| 31697       | CadSNP7292     | <i>Desi</i>      | Ca_Desig_Scaffold00356       | 176431                         | (G/T)       |
| 31698       | CadSNP7293     | <i>Desi</i>      | Ca_Desig_Scaffold00356       | 176430                         | (C/T)       |
| 31699       | CadSNP7294     | <i>Desi</i>      | Ca_Desig_Scaffold00356       | 176429                         | (G/T)       |
| 31700       | CadSNP7295     | <i>Desi</i>      | Ca_Desig_Scaffold00356       | 176426                         | (G/T)       |
| 31701       | CadSNP7296     | <i>Desi</i>      | Ca_Desig_Scaffold00357       | 38411                          | (A/C)       |
| 31702       | CadSNP7297     | <i>Desi</i>      | Ca_Desig_Scaffold00357       | 38385                          | (C/T)       |
| 31703       | CadSNP7298     | <i>Desi</i>      | Ca_Desig_Scaffold00357       | 38384                          | (G/A)       |
| 31704       | CadSNP7299     | <i>Desi</i>      | Ca_Desig_Scaffold00357       | 38378                          | (C/G)       |
| 31705       | CadSNP7300     | <i>Desi</i>      | Ca_Desig_Scaffold00357       | 38377                          | (C/T)       |
| 31706       | CadSNP7301     | <i>Desi</i>      | Ca_Desig_Scaffold00357       | 38366                          | (A/C)       |
| 31707       | CadSNP7302     | <i>Desi</i>      | Ca_Desig_Scaffold00357       | 38364                          | (T/C)       |
| 31708       | CadSNP7303     | <i>Desi</i>      | Ca_Desig_Scaffold00357       | 38363                          | (G/T)       |
| 31709       | CadSNP7304     | <i>Desi</i>      | Ca_Desig_Scaffold00357       | 38359                          | (A/G)       |
| 31710       | CadSNP7305     | <i>Desi</i>      | Ca_Desig_Scaffold00357       | 38357                          | (A/C)       |
| 31711       | CadSNP7306     | <i>Desi</i>      | Ca_Desig_Scaffold00357       | 66305                          | (G/A)       |
| 31712       | CadSNP7307     | <i>Desi</i>      | Ca_Desig_Scaffold00357       | 66248                          | (C/G)       |
| 31713       | CadSNP7308     | <i>Desi</i>      | Ca_Desig_Scaffold00357       | 127672                         | (G/C)       |
| 31714       | CadSNP7309     | <i>Desi</i>      | Ca_Desig_Scaffold00358       | 4179                           | (A/G)       |
| 31715       | CadSNP7310     | <i>Desi</i>      | Ca_Desig_Scaffold00358       | 4155                           | (C/T)       |
| 31716       | CadSNP7311     | <i>Desi</i>      | Ca_Desig_Scaffold00358       | 4116                           | (C/T)       |
| 31717       | CadSNP7312     | <i>Desi</i>      | Ca_Desig_Scaffold00358       | 4206                           | (C/A)       |
| 31718       | CadSNP7313     | <i>Desi</i>      | Ca_Desig_Scaffold00358       | 4207                           | (G/A)       |
| 31719       | CadSNP7314     | <i>Desi</i>      | Ca_Desig_Scaffold00358       | 5661                           | (G/T)       |
| 31720       | CadSNP7315     | <i>Desi</i>      | Ca_Desig_Scaffold00358       | 5663                           | (A/C)       |
| 31721       | CadSNP7316     | <i>Desi</i>      | Ca_Desig_Scaffold00358       | 5705                           | (A/G)       |
| 31722       | CadSNP7317     | <i>Desi</i>      | Ca_Desig_Scaffold00358       | 54030                          | (C/A)       |
| 31723       | CadSNP7318     | <i>Desi</i>      | Ca_Desig_Scaffold00358       | 54060                          | (C/T)       |
| 31724       | CadSNP7319     | <i>Desi</i>      | Ca_Desig_Scaffold00358       | 54070                          | (A/T)       |
| 31725       | CadSNP7320     | <i>Desi</i>      | Ca_Desig_Scaffold00358       | 59984                          | (G/T)       |
| 31726       | CadSNP7321     | <i>Desi</i>      | Ca_Desig_Scaffold00358       | 59982                          | (T/G)       |
| 31727       | CadSNP7322     | <i>Desi</i>      | Ca_Desig_Scaffold00358       | 59979                          | (G/A)       |
| 31728       | CadSNP7323     | <i>Desi</i>      | Ca_Desig_Scaffold00358       | 59970                          | (T/G)       |
| 31729       | CadSNP7324     | <i>Desi</i>      | Ca_Desig_Scaffold00358       | 59964                          | (G/A)       |

| <b>S.N.</b> | <b>SNP IDs</b> | <b>Cultivars</b> | <b>Chromosomes/scaffolds</b> | <b>Physical positions (bp)</b> | <b>SNPs</b> |
|-------------|----------------|------------------|------------------------------|--------------------------------|-------------|
| 31730       | CadSNP7325     | <i>Desi</i>      | Ca_Desig_Scaffold00358       | 59961                          | (T/C)       |
| 31731       | CadSNP7326     | <i>Desi</i>      | Ca_Desig_Scaffold00358       | 59949                          | (T/C)       |
| 31732       | CadSNP7327     | <i>Desi</i>      | Ca_Desig_Scaffold00358       | 59937                          | (G/A)       |
| 31733       | CadSNP7328     | <i>Desi</i>      | Ca_Desig_Scaffold00358       | 59922                          | (A/G)       |
| 31734       | CadSNP7329     | <i>Desi</i>      | Ca_Desig_Scaffold00358       | 59919                          | (G/A)       |
| 31735       | CadSNP7330     | <i>Desi</i>      | Ca_Desig_Scaffold00358       | 59917                          | (T/C)       |
| 31736       | CadSNP7331     | <i>Desi</i>      | Ca_Desig_Scaffold00358       | 59916                          | (A/G)       |
| 31737       | CadSNP7332     | <i>Desi</i>      | Ca_Desig_Scaffold00358       | 59913                          | (G/A)       |
| 31738       | CadSNP7333     | <i>Desi</i>      | Ca_Desig_Scaffold00358       | 60668                          | (A/G)       |
| 31739       | CadSNP7334     | <i>Desi</i>      | Ca_Desig_Scaffold00358       | 60707                          | (A/G)       |
| 31740       | CadSNP7335     | <i>Desi</i>      | Ca_Desig_Scaffold00358       | 64139                          | (T/C)       |
| 31741       | CadSNP7336     | <i>Desi</i>      | Ca_Desig_Scaffold00358       | 84579                          | (T/C)       |
| 31742       | CadSNP7337     | <i>Desi</i>      | Ca_Desig_Scaffold00358       | 87001                          | (T/A)       |
| 31743       | CadSNP7338     | <i>Desi</i>      | Ca_Desig_Scaffold00358       | 86969                          | (T/C)       |
| 31744       | CadSNP7339     | <i>Desi</i>      | Ca_Desig_Scaffold00358       | 87106                          | (T/C)       |
| 31745       | CadSNP7340     | <i>Desi</i>      | Ca_Desig_Scaffold00358       | 87130                          | (C/T)       |
| 31746       | CadSNP7341     | <i>Desi</i>      | Ca_Desig_Scaffold00358       | 87142                          | (T/G)       |
| 31747       | CadSNP7342     | <i>Desi</i>      | Ca_Desig_Scaffold00358       | 87772                          | (T/C)       |
| 31748       | CadSNP7343     | <i>Desi</i>      | Ca_Desig_Scaffold00358       | 87781                          | (C/T)       |
| 31749       | CadSNP7344     | <i>Desi</i>      | Ca_Desig_Scaffold00358       | 87788                          | (G/A)       |
| 31750       | CadSNP7345     | <i>Desi</i>      | Ca_Desig_Scaffold00358       | 87813                          | (C/T)       |
| 31751       | CadSNP7346     | <i>Desi</i>      | Ca_Desig_Scaffold00358       | 87814                          | (C/G)       |
| 31752       | CadSNP7347     | <i>Desi</i>      | Ca_Desig_Scaffold00358       | 87825                          | (G/C)       |
| 31753       | CadSNP7348     | <i>Desi</i>      | Ca_Desig_Scaffold00358       | 87829                          | (C/A)       |
| 31754       | CadSNP7349     | <i>Desi</i>      | Ca_Desig_Scaffold00358       | 87834                          | (T/A)       |
| 31755       | CadSNP7350     | <i>Desi</i>      | Ca_Desig_Scaffold00358       | 87835                          | (T/C)       |
| 31756       | CadSNP7351     | <i>Desi</i>      | Ca_Desig_Scaffold00358       | 87837                          | (G/A)       |
| 31757       | CadSNP7352     | <i>Desi</i>      | Ca_Desig_Scaffold00358       | 87838                          | (G/A)       |
| 31758       | CadSNP7353     | <i>Desi</i>      | Ca_Desig_Scaffold00358       | 87849                          | (T/A)       |
| 31759       | CadSNP7354     | <i>Desi</i>      | Ca_Desig_Scaffold00358       | 113843                         | (T/C)       |
| 31760       | CadSNP7355     | <i>Desi</i>      | Ca_Desig_Scaffold00358       | 113861                         | (T/C)       |
| 31761       | CadSNP7356     | <i>Desi</i>      | Ca_Desig_Scaffold00358       | 113891                         | (G/A)       |
| 31762       | CadSNP7357     | <i>Desi</i>      | Ca_Desig_Scaffold00358       | 113909                         | (G/T)       |
| 31763       | CadSNP7358     | <i>Desi</i>      | Ca_Desig_Scaffold00358       | 113959                         | (C/T)       |
| 31764       | CadSNP7359     | <i>Desi</i>      | Ca_Desig_Scaffold00358       | 114922                         | (A/G)       |
| 31765       | CadSNP7360     | <i>Desi</i>      | Ca_Desig_Scaffold00358       | 115047                         | (T/C)       |
| 31766       | CadSNP7361     | <i>Desi</i>      | Ca_Desig_Scaffold00358       | 115046                         | (T/A)       |
| 31767       | CadSNP7362     | <i>Desi</i>      | Ca_Desig_Scaffold00358       | 136569                         | (G/T)       |

| <b>S.N.</b> | <b>SNP IDs</b> | <b>Cultivars</b> | <b>Chromosomes/scaffolds</b> | <b>Physical positions (bp)</b> | <b>SNPs</b> |
|-------------|----------------|------------------|------------------------------|--------------------------------|-------------|
| 31768       | CadSNP7363     | <i>Desi</i>      | Ca_Desig_Scaffold00358       | 136547                         | (T/C)       |
| 31769       | CadSNP7364     | <i>Desi</i>      | Ca_Desig_Scaffold00358       | 136525                         | (T/C)       |
| 31770       | CadSNP7365     | <i>Desi</i>      | Ca_Desig_Scaffold00358       | 141753                         | (A/G)       |
| 31771       | CadSNP7366     | <i>Desi</i>      | Ca_Desig_Scaffold00358       | 141803                         | (T/C)       |
| 31772       | CadSNP7367     | <i>Desi</i>      | Ca_Desig_Scaffold00358       | 141900                         | (A/C)       |
| 31773       | CadSNP7368     | <i>Desi</i>      | Ca_Desig_Scaffold00358       | 141843                         | (G/T)       |
| 31774       | CadSNP7369     | <i>Desi</i>      | Ca_Desig_Scaffold00358       | 166963                         | (A/G)       |
| 31775       | CadSNP7370     | <i>Desi</i>      | Ca_Desig_Scaffold00358       | 169047                         | (C/A)       |
| 31776       | CadSNP7371     | <i>Desi</i>      | Ca_Desig_Scaffold00358       | 169054                         | (A/G)       |
| 31777       | CadSNP7372     | <i>Desi</i>      | Ca_Desig_Scaffold00360       | 8294                           | (C/T)       |
| 31778       | CadSNP7373     | <i>Desi</i>      | Ca_Desig_Scaffold00360       | 26627                          | (G/A)       |
| 31779       | CadSNP7374     | <i>Desi</i>      | Ca_Desig_Scaffold00360       | 77762                          | (C/T)       |
| 31780       | CadSNP7375     | <i>Desi</i>      | Ca_Desig_Scaffold00360       | 170399                         | (A/C)       |
| 31781       | CadSNP7376     | <i>Desi</i>      | Ca_Desig_Scaffold00360       | 175256                         | (G/A)       |
| 31782       | CadSNP7377     | <i>Desi</i>      | Ca_Desig_Scaffold00363       | 14323                          | (T/A)       |
| 31783       | CadSNP7378     | <i>Desi</i>      | Ca_Desig_Scaffold00363       | 137391                         | (G/A)       |
| 31784       | CadSNP7379     | <i>Desi</i>      | Ca_Desig_Scaffold00364       | 15583                          | (G/A)       |
| 31785       | CadSNP7380     | <i>Desi</i>      | Ca_Desig_Scaffold00364       | 38866                          | (T/C)       |
| 31786       | CadSNP7381     | <i>Desi</i>      | Ca_Desig_Scaffold00364       | 82802                          | (G/T)       |
| 31787       | CadSNP7382     | <i>Desi</i>      | Ca_Desig_Scaffold00364       | 82847                          | (G/A)       |
| 31788       | CadSNP7383     | <i>Desi</i>      | Ca_Desig_Scaffold00368       | 61912                          | (T/C)       |
| 31789       | CadSNP7384     | <i>Desi</i>      | Ca_Desig_Scaffold00371       | 34922                          | (T/G)       |
| 31790       | CadSNP7385     | <i>Desi</i>      | Ca_Desig_Scaffold00371       | 35017                          | (G/A)       |
| 31791       | CadSNP7386     | <i>Desi</i>      | Ca_Desig_Scaffold00371       | 35014                          | (T/C)       |
| 31792       | CadSNP7387     | <i>Desi</i>      | Ca_Desig_Scaffold00371       | 35079                          | (A/G)       |
| 31793       | CadSNP7388     | <i>Desi</i>      | Ca_Desig_Scaffold00371       | 57819                          | (A/T)       |
| 31794       | CadSNP7389     | <i>Desi</i>      | Ca_Desig_Scaffold00371       | 72595                          | (C/T)       |
| 31795       | CadSNP7390     | <i>Desi</i>      | Ca_Desig_Scaffold00371       | 80049                          | (T/C)       |
| 31796       | CadSNP7391     | <i>Desi</i>      | Ca_Desig_Scaffold00371       | 80055                          | (G/A)       |
| 31797       | CadSNP7392     | <i>Desi</i>      | Ca_Desig_Scaffold00371       | 80093                          | (C/T)       |
| 31798       | CadSNP7393     | <i>Desi</i>      | Ca_Desig_Scaffold00374       | 168776                         | (T/C)       |
| 31799       | CadSNP7394     | <i>Desi</i>      | Ca_Desig_Scaffold00374       | 168734                         | (G/T)       |
| 31800       | CadSNP7395     | <i>Desi</i>      | Ca_Desig_Scaffold00376       | 11345                          | (A/G)       |
| 31801       | CadSNP7396     | <i>Desi</i>      | Ca_Desig_Scaffold00376       | 18847                          | (C/T)       |
| 31802       | CadSNP7397     | <i>Desi</i>      | Ca_Desig_Scaffold00376       | 129442                         | (T/C)       |
| 31803       | CadSNP7398     | <i>Desi</i>      | Ca_Desig_Scaffold00381       | 16995                          | (A/G)       |
| 31804       | CadSNP7399     | <i>Desi</i>      | Ca_Desig_Scaffold00381       | 48706                          | (C/T)       |
| 31805       | CadSNP7400     | <i>Desi</i>      | Ca_Desig_Scaffold00381       | 48757                          | (T/C)       |

| <b>S.N.</b> | <b>SNP IDs</b> | <b>Cultivars</b> | <b>Chromosomes/scaffolds</b> | <b>Physical positions (bp)</b> | <b>SNPs</b> |
|-------------|----------------|------------------|------------------------------|--------------------------------|-------------|
| 31806       | CadSNP7401     | <i>Desi</i>      | Ca_Desig_Scaffold00381       | 48762                          | (A/G)       |
| 31807       | CadSNP7402     | <i>Desi</i>      | Ca_Desig_Scaffold00381       | 48771                          | (G/A)       |
| 31808       | CadSNP7403     | <i>Desi</i>      | Ca_Desig_Scaffold00381       | 48774                          | (T/C)       |
| 31809       | CadSNP7404     | <i>Desi</i>      | Ca_Desig_Scaffold00381       | 92859                          | (C/T)       |
| 31810       | CadSNP7405     | <i>Desi</i>      | Ca_Desig_Scaffold00381       | 92892                          | (C/A)       |
| 31811       | CadSNP7406     | <i>Desi</i>      | Ca_Desig_Scaffold00381       | 113026                         | (T/C)       |
| 31812       | CadSNP7407     | <i>Desi</i>      | Ca_Desig_Scaffold00381       | 127238                         | (G/T)       |
| 31813       | CadSNP7408     | <i>Desi</i>      | Ca_Desig_Scaffold00381       | 127328                         | (A/C)       |
| 31814       | CadSNP7409     | <i>Desi</i>      | Ca_Desig_Scaffold00381       | 127332                         | (A/T)       |
| 31815       | CadSNP7410     | <i>Desi</i>      | Ca_Desig_Scaffold00381       | 128216                         | (A/C)       |
| 31816       | CadSNP7411     | <i>Desi</i>      | Ca_Desig_Scaffold00381       | 128247                         | (T/A)       |
| 31817       | CadSNP7412     | <i>Desi</i>      | Ca_Desig_Scaffold00381       | 128277                         | (A/T)       |
| 31818       | CadSNP7413     | <i>Desi</i>      | Ca_Desig_Scaffold00381       | 129872                         | (A/G)       |
| 31819       | CadSNP7414     | <i>Desi</i>      | Ca_Desig_Scaffold00381       | 136217                         | (C/A)       |
| 31820       | CadSNP7415     | <i>Desi</i>      | Ca_Desig_Scaffold00381       | 136227                         | (A/T)       |
| 31821       | CadSNP7416     | <i>Desi</i>      | Ca_Desig_Scaffold00381       | 136944                         | (T/A)       |
| 31822       | CadSNP7417     | <i>Desi</i>      | Ca_Desig_Scaffold00381       | 137172                         | (A/T)       |
| 31823       | CadSNP7418     | <i>Desi</i>      | Ca_Desig_Scaffold00381       | 137155                         | (T/A)       |
| 31824       | CadSNP7419     | <i>Desi</i>      | Ca_Desig_Scaffold00381       | 137111                         | (G/C)       |
| 31825       | CadSNP7420     | <i>Desi</i>      | Ca_Desig_Scaffold00381       | 149326                         | (G/A)       |
| 31826       | CadSNP7421     | <i>Desi</i>      | Ca_Desig_Scaffold00381       | 149384                         | (G/A)       |
| 31827       | CadSNP7422     | <i>Desi</i>      | Ca_Desig_Scaffold00381       | 149399                         | (G/T)       |
| 31828       | CadSNP7423     | <i>Desi</i>      | Ca_Desig_Scaffold00381       | 149441                         | (A/G)       |
| 31829       | CadSNP7424     | <i>Desi</i>      | Ca_Desig_Scaffold00381       | 177554                         | (T/C)       |
| 31830       | CadSNP7425     | <i>Desi</i>      | Ca_Desig_Scaffold00381       | 179615                         | (G/C)       |
| 31831       | CadSNP7426     | <i>Desi</i>      | Ca_Desig_Scaffold00382       | 116811                         | (A/C)       |
| 31832       | CadSNP7427     | <i>Desi</i>      | Ca_Desig_Scaffold00383       | 55779                          | (A/G)       |
| 31833       | CadSNP7428     | <i>Desi</i>      | Ca_Desig_Scaffold00383       | 61089                          | (C/A)       |
| 31834       | CadSNP7429     | <i>Desi</i>      | Ca_Desig_Scaffold00383       | 61283                          | (A/G)       |
| 31835       | CadSNP7430     | <i>Desi</i>      | Ca_Desig_Scaffold00383       | 61273                          | (C/G)       |
| 31836       | CadSNP7431     | <i>Desi</i>      | Ca_Desig_Scaffold00383       | 170998                         | (G/T)       |
| 31837       | CadSNP7432     | <i>Desi</i>      | Ca_Desig_Scaffold00383       | 171011                         | (T/G)       |
| 31838       | CadSNP7433     | <i>Desi</i>      | Ca_Desig_Scaffold00383       | 171024                         | (C/A)       |
| 31839       | CadSNP7434     | <i>Desi</i>      | Ca_Desig_Scaffold00383       | 171107                         | (T/G)       |
| 31840       | CadSNP7435     | <i>Desi</i>      | Ca_Desig_Scaffold00384       | 53855                          | (T/A)       |
| 31841       | CadSNP7436     | <i>Desi</i>      | Ca_Desig_Scaffold00384       | 53885                          | (A/G)       |
| 31842       | CadSNP7437     | <i>Desi</i>      | Ca_Desig_Scaffold00384       | 53888                          | (T/G)       |
| 31843       | CadSNP7438     | <i>Desi</i>      | Ca_Desig_Scaffold00384       | 53897                          | (A/C)       |



| <b>S.N.</b> | <b>SNP IDs</b> | <b>Cultivars</b> | <b>Chromosomes/scaffolds</b> | <b>Physical positions (bp)</b> | <b>SNPs</b> |
|-------------|----------------|------------------|------------------------------|--------------------------------|-------------|
| 31844       | CadSNP7439     | <i>Desi</i>      | Ca_Desig_Scaffold00384       | 53909                          | (A/G)       |
| 31845       | CadSNP7440     | <i>Desi</i>      | Ca_Desig_Scaffold00384       | 53911                          | (T/C)       |
| 31846       | CadSNP7441     | <i>Desi</i>      | Ca_Desig_Scaffold00384       | 53915                          | (T/A)       |
| 31847       | CadSNP7442     | <i>Desi</i>      | Ca_Desig_Scaffold00384       | 53918                          | (C/G)       |
| 31848       | CadSNP7443     | <i>Desi</i>      | Ca_Desig_Scaffold00384       | 53929                          | (C/G)       |
| 31849       | CadSNP7444     | <i>Desi</i>      | Ca_Desig_Scaffold00384       | 53933                          | (G/A)       |
| 31850       | CadSNP7445     | <i>Desi</i>      | Ca_Desig_Scaffold00384       | 53936                          | (A/C)       |
| 31851       | CadSNP7446     | <i>Desi</i>      | Ca_Desig_Scaffold00384       | 178043                         | (G/C)       |
| 31852       | CadSNP7447     | <i>Desi</i>      | Ca_Desig_Scaffold00385       | 166507                         | (A/G)       |
| 31853       | CadSNP7448     | <i>Desi</i>      | Ca_Desig_Scaffold00385       | 166548                         | (G/C)       |
| 31854       | CadSNP7449     | <i>Desi</i>      | Ca_Desig_Scaffold00385       | 166561                         | (A/G)       |
| 31855       | CadSNP7450     | <i>Desi</i>      | Ca_Desig_Scaffold00385       | 166670                         | (T/G)       |
| 31856       | CadSNP7451     | <i>Desi</i>      | Ca_Desig_Scaffold00385       | 166778                         | (G/A)       |
| 31857       | CadSNP7452     | <i>Desi</i>      | Ca_Desig_Scaffold00385       | 167051                         | (T/C)       |
| 31858       | CadSNP7453     | <i>Desi</i>      | Ca_Desig_Scaffold00390       | 9734                           | (T/G)       |
| 31859       | CadSNP7454     | <i>Desi</i>      | Ca_Desig_Scaffold00390       | 20736                          | (G/T)       |
| 31860       | CadSNP7455     | <i>Desi</i>      | Ca_Desig_Scaffold00390       | 20839                          | (C/T)       |
| 31861       | CadSNP7456     | <i>Desi</i>      | Ca_Desig_Scaffold00390       | 20811                          | (A/C)       |
| 31862       | CadSNP7457     | <i>Desi</i>      | Ca_Desig_Scaffold00390       | 21193                          | (G/A)       |
| 31863       | CadSNP7458     | <i>Desi</i>      | Ca_Desig_Scaffold00390       | 21197                          | (G/T)       |
| 31864       | CadSNP7459     | <i>Desi</i>      | Ca_Desig_Scaffold00390       | 57690                          | (A/C)       |
| 31865       | CadSNP7460     | <i>Desi</i>      | Ca_Desig_Scaffold00390       | 57691                          | (G/C)       |
| 31866       | CadSNP7461     | <i>Desi</i>      | Ca_Desig_Scaffold00390       | 97662                          | (A/G)       |
| 31867       | CadSNP7462     | <i>Desi</i>      | Ca_Desig_Scaffold00390       | 102927                         | (C/T)       |
| 31868       | CadSNP7463     | <i>Desi</i>      | Ca_Desig_Scaffold00390       | 128916                         | (C/T)       |
| 31869       | CadSNP7464     | <i>Desi</i>      | Ca_Desig_Scaffold00390       | 129490                         | (C/A)       |
| 31870       | CadSNP7465     | <i>Desi</i>      | Ca_Desig_Scaffold00390       | 140456                         | (T/A)       |
| 31871       | CadSNP7466     | <i>Desi</i>      | Ca_Desig_Scaffold00390       | 146114                         | (C/G)       |
| 31872       | CadSNP7467     | <i>Desi</i>      | Ca_Desig_Scaffold00390       | 146102                         | (A/G)       |
| 31873       | CadSNP7468     | <i>Desi</i>      | Ca_Desig_Scaffold00390       | 146066                         | (A/G)       |
| 31874       | CadSNP7469     | <i>Desi</i>      | Ca_Desig_Scaffold00390       | 146178                         | (A/G)       |
| 31875       | CadSNP7470     | <i>Desi</i>      | Ca_Desig_Scaffold00390       | 170441                         | (A/T)       |
| 31876       | CadSNP7471     | <i>Desi</i>      | Ca_Desig_Scaffold00390       | 170460                         | (G/A)       |
| 31877       | CadSNP7472     | <i>Desi</i>      | Ca_Desig_Scaffold00390       | 170475                         | (T/G)       |
| 31878       | CadSNP7473     | <i>Desi</i>      | Ca_Desig_Scaffold00390       | 170485                         | (C/T)       |
| 31879       | CadSNP7474     | <i>Desi</i>      | Ca_Desig_Scaffold00394       | 54392                          | (T/C)       |
| 31880       | CadSNP7475     | <i>Desi</i>      | Ca_Desig_Scaffold00394       | 57729                          | (G/A)       |
| 31881       | CadSNP7476     | <i>Desi</i>      | Ca_Desig_Scaffold00394       | 57781                          | (C/T)       |

| <b>S.N.</b> | <b>SNP IDs</b> | <b>Cultivars</b> | <b>Chromosomes/scaffolds</b> | <b>Physical positions (bp)</b> | <b>SNPs</b> |
|-------------|----------------|------------------|------------------------------|--------------------------------|-------------|
| 31882       | CadSNP7477     | <i>Desi</i>      | Ca_Desig_Scaffold00394       | 63185                          | (A/G)       |
| 31883       | CadSNP7478     | <i>Desi</i>      | Ca_Desig_Scaffold00394       | 89505                          | (A/T)       |
| 31884       | CadSNP7479     | <i>Desi</i>      | Ca_Desig_Scaffold00394       | 95033                          | (A/G)       |
| 31885       | CadSNP7480     | <i>Desi</i>      | Ca_Desig_Scaffold00394       | 128542                         | (G/T)       |
| 31886       | CadSNP7481     | <i>Desi</i>      | Ca_Desig_Scaffold00396       | 65774                          | (A/T)       |
| 31887       | CadSNP7482     | <i>Desi</i>      | Ca_Desig_Scaffold00396       | 65775                          | (T/A)       |
| 31888       | CadSNP7483     | <i>Desi</i>      | Ca_Desig_Scaffold00398       | 59294                          | (G/T)       |
| 31889       | CadSNP7484     | <i>Desi</i>      | Ca_Desig_Scaffold00398       | 59340                          | (T/C)       |
| 31890       | CadSNP7485     | <i>Desi</i>      | Ca_Desig_Scaffold00398       | 133417                         | (T/C)       |
| 31891       | CadSNP7486     | <i>Desi</i>      | Ca_Desig_Scaffold00398       | 171208                         | (G/T)       |
| 31892       | CadSNP7487     | <i>Desi</i>      | Ca_Desig_Scaffold00398       | 171167                         | (C/T)       |
| 31893       | CadSNP7488     | <i>Desi</i>      | Ca_Desig_Scaffold00400       | 3799                           | (T/G)       |
| 31894       | CadSNP7489     | <i>Desi</i>      | Ca_Desig_Scaffold00400       | 26610                          | (T/A)       |
| 31895       | CadSNP7490     | <i>Desi</i>      | Ca_Desig_Scaffold00400       | 26608                          | (C/T)       |
| 31896       | CadSNP7491     | <i>Desi</i>      | Ca_Desig_Scaffold00400       | 26604                          | (T/C)       |
| 31897       | CadSNP7492     | <i>Desi</i>      | Ca_Desig_Scaffold00400       | 26602                          | (G/A)       |
| 31898       | CadSNP7493     | <i>Desi</i>      | Ca_Desig_Scaffold00400       | 26580                          | (A/G)       |
| 31899       | CadSNP7494     | <i>Desi</i>      | Ca_Desig_Scaffold00400       | 26577                          | (T/C)       |
| 31900       | CadSNP7495     | <i>Desi</i>      | Ca_Desig_Scaffold00400       | 26541                          | (A/G)       |
| 31901       | CadSNP7496     | <i>Desi</i>      | Ca_Desig_Scaffold00400       | 26533                          | (T/A)       |
| 31902       | CadSNP7497     | <i>Desi</i>      | Ca_Desig_Scaffold00400       | 45077                          | (A/G)       |
| 31903       | CadSNP7498     | <i>Desi</i>      | Ca_Desig_Scaffold00400       | 137447                         | (A/T)       |
| 31904       | CadSNP7499     | <i>Desi</i>      | Ca_Desig_Scaffold00401       | 770                            | (G/A)       |
| 31905       | CadSNP7500     | <i>Desi</i>      | Ca_Desig_Scaffold00401       | 783                            | (A/C)       |
| 31906       | CadSNP7501     | <i>Desi</i>      | Ca_Desig_Scaffold00401       | 797                            | (G/A)       |
| 31907       | CadSNP7502     | <i>Desi</i>      | Ca_Desig_Scaffold00401       | 805                            | (C/T)       |
| 31908       | CadSNP7503     | <i>Desi</i>      | Ca_Desig_Scaffold00401       | 179685                         | (A/C)       |
| 31909       | CadSNP7504     | <i>Desi</i>      | Ca_Desig_Scaffold00402       | 28580                          | (T/G)       |
| 31910       | CadSNP7505     | <i>Desi</i>      | Ca_Desig_Scaffold00402       | 28695                          | (A/G)       |
| 31911       | CadSNP7506     | <i>Desi</i>      | Ca_Desig_Scaffold00402       | 28778                          | (G/A)       |
| 31912       | CadSNP7507     | <i>Desi</i>      | Ca_Desig_Scaffold00402       | 103606                         | (T/C)       |
| 31913       | CadSNP7508     | <i>Desi</i>      | Ca_Desig_Scaffold00402       | 103642                         | (G/A)       |
| 31914       | CadSNP7509     | <i>Desi</i>      | Ca_Desig_Scaffold00402       | 103629                         | (A/G)       |
| 31915       | CadSNP7510     | <i>Desi</i>      | Ca_Desig_Scaffold00402       | 103626                         | (G/A)       |
| 31916       | CadSNP7511     | <i>Desi</i>      | Ca_Desig_Scaffold00402       | 161355                         | (T/C)       |
| 31917       | CadSNP7512     | <i>Desi</i>      | Ca_Desig_Scaffold00402       | 161484                         | (A/G)       |
| 31918       | CadSNP7513     | <i>Desi</i>      | Ca_Desig_Scaffold00402       | 172580                         | (T/C)       |
| 31919       | CadSNP7514     | <i>Desi</i>      | Ca_Desig_Scaffold00402       | 172640                         | (C/T)       |

| <b>S.N.</b> | <b>SNP IDs</b> | <b>Cultivars</b> | <b>Chromosomes/scaffolds</b> | <b>Physical positions (bp)</b> | <b>SNPs</b> |
|-------------|----------------|------------------|------------------------------|--------------------------------|-------------|
| 31920       | CadSNP7515     | <i>Desi</i>      | Ca_Desig_Scaffold00402       | 173305                         | (G/A)       |
| 31921       | CadSNP7516     | <i>Desi</i>      | Ca_Desig_Scaffold00402       | 173313                         | (C/G)       |
| 31922       | CadSNP7517     | <i>Desi</i>      | Ca_Desig_Scaffold00402       | 173346                         | (G/T)       |
| 31923       | CadSNP7518     | <i>Desi</i>      | Ca_Desig_Scaffold00402       | 173364                         | (G/A)       |
| 31924       | CadSNP7519     | <i>Desi</i>      | Ca_Desig_Scaffold00407       | 21242                          | (C/T)       |
| 31925       | CadSNP7520     | <i>Desi</i>      | Ca_Desig_Scaffold00407       | 21307                          | (C/A)       |
| 31926       | CadSNP7521     | <i>Desi</i>      | Ca_Desig_Scaffold00407       | 64812                          | (G/A)       |
| 31927       | CadSNP7522     | <i>Desi</i>      | Ca_Desig_Scaffold00407       | 64824                          | (A/T)       |
| 31928       | CadSNP7523     | <i>Desi</i>      | Ca_Desig_Scaffold00407       | 64963                          | (A/C)       |
| 31929       | CadSNP7524     | <i>Desi</i>      | Ca_Desig_Scaffold00407       | 68861                          | (C/A)       |
| 31930       | CadSNP7525     | <i>Desi</i>      | Ca_Desig_Scaffold00407       | 84271                          | (A/G)       |
| 31931       | CadSNP7526     | <i>Desi</i>      | Ca_Desig_Scaffold00407       | 127831                         | (A/C)       |
| 31932       | CadSNP7527     | <i>Desi</i>      | Ca_Desig_Scaffold00407       | 128000                         | (T/A)       |
| 31933       | CadSNP7528     | <i>Desi</i>      | Ca_Desig_Scaffold00408       | 130777                         | (A/G)       |
| 31934       | CadSNP7529     | <i>Desi</i>      | Ca_Desig_Scaffold00409       | 7135                           | (A/G)       |
| 31935       | CadSNP7530     | <i>Desi</i>      | Ca_Desig_Scaffold00409       | 7133                           | (G/A)       |
| 31936       | CadSNP7531     | <i>Desi</i>      | Ca_Desig_Scaffold00409       | 13789                          | (G/A)       |
| 31937       | CadSNP7532     | <i>Desi</i>      | Ca_Desig_Scaffold00409       | 92402                          | (G/T)       |
| 31938       | CadSNP7533     | <i>Desi</i>      | Ca_Desig_Scaffold00409       | 92432                          | (C/A)       |
| 31939       | CadSNP7534     | <i>Desi</i>      | Ca_Desig_Scaffold00415       | 227564                         | (A/T)       |
| 31940       | CadSNP7535     | <i>Desi</i>      | Ca_Desig_Scaffold00415       | 227566                         | (G/T)       |
| 31941       | CadSNP7536     | <i>Desi</i>      | Ca_Desig_Scaffold00415       | 227573                         | (A/C)       |
| 31942       | CadSNP7537     | <i>Desi</i>      | Ca_Desig_Scaffold00415       | 227548                         | (A/T)       |
| 31943       | CadSNP7538     | <i>Desi</i>      | Ca_Desig_Scaffold00417       | 19371                          | (A/G)       |
| 31944       | CadSNP7539     | <i>Desi</i>      | Ca_Desig_Scaffold00417       | 50200                          | (T/C)       |
| 31945       | CadSNP7540     | <i>Desi</i>      | Ca_Desig_Scaffold00417       | 107434                         | (C/T)       |
| 31946       | CadSNP7541     | <i>Desi</i>      | Ca_Desig_Scaffold00417       | 107437                         | (C/G)       |
| 31947       | CadSNP7542     | <i>Desi</i>      | Ca_Desig_Scaffold00417       | 107449                         | (C/T)       |
| 31948       | CadSNP7543     | <i>Desi</i>      | Ca_Desig_Scaffold00418       | 162291                         | (C/A)       |
| 31949       | CadSNP7544     | <i>Desi</i>      | Ca_Desig_Scaffold00418       | 165187                         | (C/T)       |
| 31950       | CadSNP7545     | <i>Desi</i>      | Ca_Desig_Scaffold00418       | 165188                         | (T/C)       |
| 31951       | CadSNP7546     | <i>Desi</i>      | Ca_Desig_Scaffold00418       | 165212                         | (T/C)       |
| 31952       | CadSNP7547     | <i>Desi</i>      | Ca_Desig_Scaffold00419       | 16761                          | (T/C)       |
| 31953       | CadSNP7548     | <i>Desi</i>      | Ca_Desig_Scaffold00419       | 17411                          | (G/T)       |
| 31954       | CadSNP7549     | <i>Desi</i>      | Ca_Desig_Scaffold00419       | 17352                          | (G/A)       |
| 31955       | CadSNP7550     | <i>Desi</i>      | Ca_Desig_Scaffold00419       | 28474                          | (A/G)       |
| 31956       | CadSNP7551     | <i>Desi</i>      | Ca_Desig_Scaffold00419       | 31750                          | (A/G)       |
| 31957       | CadSNP7552     | <i>Desi</i>      | Ca_Desig_Scaffold00419       | 37199                          | (A/T)       |

| <b>S.N.</b> | <b>SNP IDs</b> | <b>Cultivars</b> | <b>Chromosomes/scaffolds</b> | <b>Physical positions (bp)</b> | <b>SNPs</b> |
|-------------|----------------|------------------|------------------------------|--------------------------------|-------------|
| 31958       | CadSNP7553     | <i>Desi</i>      | Ca_Desig_Scaffold00419       | 37225                          | (C/T)       |
| 31959       | CadSNP7554     | <i>Desi</i>      | Ca_Desig_Scaffold00419       | 71346                          | (A/G)       |
| 31960       | CadSNP7555     | <i>Desi</i>      | Ca_Desig_Scaffold00420       | 10777                          | (G/C)       |
| 31961       | CadSNP7556     | <i>Desi</i>      | Ca_Desig_Scaffold00420       | 19876                          | (T/G)       |
| 31962       | CadSNP7557     | <i>Desi</i>      | Ca_Desig_Scaffold00420       | 20834                          | (G/A)       |
| 31963       | CadSNP7558     | <i>Desi</i>      | Ca_Desig_Scaffold00420       | 20833                          | (A/G)       |
| 31964       | CadSNP7559     | <i>Desi</i>      | Ca_Desig_Scaffold00420       | 23299                          | (A/G)       |
| 31965       | CadSNP7560     | <i>Desi</i>      | Ca_Desig_Scaffold00420       | 58218                          | (C/T)       |
| 31966       | CadSNP7561     | <i>Desi</i>      | Ca_Desig_Scaffold00420       | 95188                          | (G/A)       |
| 31967       | CadSNP7562     | <i>Desi</i>      | Ca_Desig_Scaffold00420       | 120688                         | (T/A)       |
| 31968       | CadSNP7563     | <i>Desi</i>      | Ca_Desig_Scaffold00420       | 120779                         | (A/G)       |
| 31969       | CadSNP7564     | <i>Desi</i>      | Ca_Desig_Scaffold00420       | 153441                         | (A/T)       |
| 31970       | CadSNP7565     | <i>Desi</i>      | Ca_Desig_Scaffold00420       | 153429                         | (G/A)       |
| 31971       | CadSNP7566     | <i>Desi</i>      | Ca_Desig_Scaffold00420       | 153483                         | (G/A)       |
| 31972       | CadSNP7567     | <i>Desi</i>      | Ca_Desig_Scaffold00420       | 153499                         | (C/T)       |
| 31973       | CadSNP7568     | <i>Desi</i>      | Ca_Desig_Scaffold00420       | 153544                         | (C/T)       |
| 31974       | CadSNP7569     | <i>Desi</i>      | Ca_Desig_Scaffold00420       | 153592                         | (T/C)       |
| 31975       | CadSNP7570     | <i>Desi</i>      | Ca_Desig_Scaffold00423       | 35078                          | (T/C)       |
| 31976       | CadSNP7571     | <i>Desi</i>      | Ca_Desig_Scaffold00423       | 40819                          | (C/T)       |
| 31977       | CadSNP7572     | <i>Desi</i>      | Ca_Desig_Scaffold00423       | 60413                          | (A/T)       |
| 31978       | CadSNP7573     | <i>Desi</i>      | Ca_Desig_Scaffold00423       | 60386                          | (G/A)       |
| 31979       | CadSNP7574     | <i>Desi</i>      | Ca_Desig_Scaffold00423       | 74452                          | (C/T)       |
| 31980       | CadSNP7575     | <i>Desi</i>      | Ca_Desig_Scaffold00423       | 76126                          | (C/G)       |
| 31981       | CadSNP7576     | <i>Desi</i>      | Ca_Desig_Scaffold00423       | 76157                          | (T/G)       |
| 31982       | CadSNP7577     | <i>Desi</i>      | Ca_Desig_Scaffold00423       | 103616                         | (T/C)       |
| 31983       | CadSNP7578     | <i>Desi</i>      | Ca_Desig_Scaffold00423       | 103619                         | (A/G)       |
| 31984       | CadSNP7579     | <i>Desi</i>      | Ca_Desig_Scaffold00423       | 103625                         | (T/G)       |
| 31985       | CadSNP7580     | <i>Desi</i>      | Ca_Desig_Scaffold00423       | 103678                         | (A/G)       |
| 31986       | CadSNP7581     | <i>Desi</i>      | Ca_Desig_Scaffold00423       | 103711                         | (G/T)       |
| 31987       | CadSNP7582     | <i>Desi</i>      | Ca_Desig_Scaffold00423       | 103699                         | (A/G)       |
| 31988       | CadSNP7583     | <i>Desi</i>      | Ca_Desig_Scaffold00429       | 113613                         | (A/C)       |
| 31989       | CadSNP7584     | <i>Desi</i>      | Ca_Desig_Scaffold00429       | 113612                         | (A/T)       |
| 31990       | CadSNP7585     | <i>Desi</i>      | Ca_Desig_Scaffold00435       | 36448                          | (T/A)       |
| 31991       | CadSNP7586     | <i>Desi</i>      | Ca_Desig_Scaffold00435       | 68893                          | (C/T)       |
| 31992       | CadSNP7587     | <i>Desi</i>      | Ca_Desig_Scaffold00435       | 100414                         | (G/A)       |
| 31993       | CadSNP7588     | <i>Desi</i>      | Ca_Desig_Scaffold00435       | 100464                         | (C/T)       |
| 31994       | CadSNP7589     | <i>Desi</i>      | Ca_Desig_Scaffold00437       | 63866                          | (A/C)       |
| 31995       | CadSNP7590     | <i>Desi</i>      | Ca_Desig_Scaffold00437       | 66266                          | (A/T)       |

| <b>S.N.</b> | <b>SNP IDs</b> | <b>Cultivars</b> | <b>Chromosomes/scaffolds</b> | <b>Physical positions (bp)</b> | <b>SNPs</b> |
|-------------|----------------|------------------|------------------------------|--------------------------------|-------------|
| 31996       | CadSNP7591     | <i>Desi</i>      | Ca_Desig_Scaffold00437       | 66264                          | (C/T)       |
| 31997       | CadSNP7592     | <i>Desi</i>      | Ca_Desig_Scaffold00437       | 95740                          | (C/T)       |
| 31998       | CadSNP7593     | <i>Desi</i>      | Ca_Desig_Scaffold00437       | 96008                          | (A/G)       |
| 31999       | CadSNP7594     | <i>Desi</i>      | Ca_Desig_Scaffold00437       | 96361                          | (A/T)       |
| 32000       | CadSNP7595     | <i>Desi</i>      | Ca_Desig_Scaffold00437       | 96354                          | (C/G)       |
| 32001       | CadSNP7596     | <i>Desi</i>      | Ca_Desig_Scaffold00437       | 96349                          | (C/T)       |
| 32002       | CadSNP7597     | <i>Desi</i>      | Ca_Desig_Scaffold00437       | 96344                          | (A/C)       |
| 32003       | CadSNP7598     | <i>Desi</i>      | Ca_Desig_Scaffold00437       | 96337                          | (C/T)       |
| 32004       | CadSNP7599     | <i>Desi</i>      | Ca_Desig_Scaffold00437       | 109012                         | (A/C)       |
| 32005       | CadSNP7600     | <i>Desi</i>      | Ca_Desig_Scaffold00438       | 28209                          | (T/G)       |
| 32006       | CadSNP7601     | <i>Desi</i>      | Ca_Desig_Scaffold00438       | 41669                          | (A/C)       |
| 32007       | CadSNP7602     | <i>Desi</i>      | Ca_Desig_Scaffold00438       | 41849                          | (G/C)       |
| 32008       | CadSNP7603     | <i>Desi</i>      | Ca_Desig_Scaffold00438       | 98448                          | (G/A)       |
| 32009       | CadSNP7604     | <i>Desi</i>      | Ca_Desig_Scaffold00438       | 116648                         | (T/A)       |
| 32010       | CadSNP7605     | <i>Desi</i>      | Ca_Desig_Scaffold00438       | 129543                         | (G/A)       |
| 32011       | CadSNP7606     | <i>Desi</i>      | Ca_Desig_Scaffold00440       | 10922                          | (C/G)       |
| 32012       | CadSNP7607     | <i>Desi</i>      | Ca_Desig_Scaffold00440       | 10866                          | (T/C)       |
| 32013       | CadSNP7608     | <i>Desi</i>      | Ca_Desig_Scaffold00440       | 11562                          | (C/T)       |
| 32014       | CadSNP7609     | <i>Desi</i>      | Ca_Desig_Scaffold00440       | 11758                          | (A/G)       |
| 32015       | CadSNP7610     | <i>Desi</i>      | Ca_Desig_Scaffold00440       | 11731                          | (C/T)       |
| 32016       | CadSNP7611     | <i>Desi</i>      | Ca_Desig_Scaffold00440       | 57309                          | (T/A)       |
| 32017       | CadSNP7612     | <i>Desi</i>      | Ca_Desig_Scaffold00440       | 141645                         | (C/T)       |
| 32018       | CadSNP7613     | <i>Desi</i>      | Ca_Desig_Scaffold00440       | 146753                         | (T/C)       |
| 32019       | CadSNP7614     | <i>Desi</i>      | Ca_Desig_Scaffold00440       | 146779                         | (A/G)       |
| 32020       | CadSNP7615     | <i>Desi</i>      | Ca_Desig_Scaffold00440       | 147647                         | (T/A)       |
| 32021       | CadSNP7616     | <i>Desi</i>      | Ca_Desig_Scaffold00440       | 158140                         | (A/G)       |
| 32022       | CadSNP7617     | <i>Desi</i>      | Ca_Desig_Scaffold00440       | 158238                         | (A/C)       |
| 32023       | CadSNP7618     | <i>Desi</i>      | Ca_Desig_Scaffold00440       | 161122                         | (C/A)       |
| 32024       | CadSNP7619     | <i>Desi</i>      | Ca_Desig_Scaffold00441       | 99425                          | (T/C)       |
| 32025       | CadSNP7620     | <i>Desi</i>      | Ca_Desig_Scaffold00441       | 99466                          | (G/A)       |
| 32026       | CadSNP7621     | <i>Desi</i>      | Ca_Desig_Scaffold00441       | 141636                         | (C/A)       |
| 32027       | CadSNP7622     | <i>Desi</i>      | Ca_Desig_Scaffold00441       | 141695                         | (A/C)       |
| 32028       | CadSNP7623     | <i>Desi</i>      | Ca_Desig_Scaffold00444       | 122158                         | (T/C)       |
| 32029       | CadSNP7624     | <i>Desi</i>      | Ca_Desig_Scaffold00444       | 122446                         | (T/C)       |
| 32030       | CadSNP7625     | <i>Desi</i>      | Ca_Desig_Scaffold00446       | 325471                         | (A/G)       |
| 32031       | CadSNP7626     | <i>Desi</i>      | Ca_Desig_Scaffold00447       | 71827                          | (A/C)       |
| 32032       | CadSNP7627     | <i>Desi</i>      | Ca_Desig_Scaffold00447       | 71838                          | (G/C)       |
| 32033       | CadSNP7628     | <i>Desi</i>      | Ca_Desig_Scaffold00447       | 71880                          | (G/A)       |

| <b>S.N.</b> | <b>SNP IDs</b> | <b>Cultivars</b> | <b>Chromosomes/scaffolds</b> | <b>Physical positions (bp)</b> | <b>SNPs</b> |
|-------------|----------------|------------------|------------------------------|--------------------------------|-------------|
| 32034       | CadSNP7629     | <i>Desi</i>      | Ca_Desig_Scaffold00447       | 72008                          | (C/T)       |
| 32035       | CadSNP7630     | <i>Desi</i>      | Ca_Desig_Scaffold00447       | 71990                          | (A/T)       |
| 32036       | CadSNP7631     | <i>Desi</i>      | Ca_Desig_Scaffold00447       | 71975                          | (T/C)       |
| 32037       | CadSNP7632     | <i>Desi</i>      | Ca_Desig_Scaffold00447       | 71954                          | (A/G)       |
| 32038       | CadSNP7633     | <i>Desi</i>      | Ca_Desig_Scaffold00447       | 73252                          | (G/A)       |
| 32039       | CadSNP7634     | <i>Desi</i>      | Ca_Desig_Scaffold00447       | 73309                          | (G/A)       |
| 32040       | CadSNP7635     | <i>Desi</i>      | Ca_Desig_Scaffold00447       | 73358                          | (C/T)       |
| 32041       | CadSNP7636     | <i>Desi</i>      | Ca_Desig_Scaffold00447       | 73405                          | (G/T)       |
| 32042       | CadSNP7637     | <i>Desi</i>      | Ca_Desig_Scaffold00447       | 73421                          | (A/G)       |
| 32043       | CadSNP7638     | <i>Desi</i>      | Ca_Desig_Scaffold00447       | 73471                          | (C/T)       |
| 32044       | CadSNP7639     | <i>Desi</i>      | Ca_Desig_Scaffold00447       | 73477                          | (A/G)       |
| 32045       | CadSNP7640     | <i>Desi</i>      | Ca_Desig_Scaffold00447       | 73519                          | (C/G)       |
| 32046       | CadSNP7641     | <i>Desi</i>      | Ca_Desig_Scaffold00447       | 73960                          | (A/C)       |
| 32047       | CadSNP7642     | <i>Desi</i>      | Ca_Desig_Scaffold00447       | 80443                          | (A/G)       |
| 32048       | CadSNP7643     | <i>Desi</i>      | Ca_Desig_Scaffold00447       | 139082                         | (T/A)       |
| 32049       | CadSNP7644     | <i>Desi</i>      | Ca_Desig_Scaffold00447       | 140035                         | (T/C)       |
| 32050       | CadSNP7645     | <i>Desi</i>      | Ca_Desig_Scaffold00447       | 140045                         | (C/T)       |
| 32051       | CadSNP7646     | <i>Desi</i>      | Ca_Desig_Scaffold00447       | 140103                         | (A/C)       |
| 32052       | CadSNP7647     | <i>Desi</i>      | Ca_Desig_Scaffold00447       | 140119                         | (T/A)       |
| 32053       | CadSNP7648     | <i>Desi</i>      | Ca_Desig_Scaffold00447       | 142840                         | (A/T)       |
| 32054       | CadSNP7649     | <i>Desi</i>      | Ca_Desig_Scaffold00447       | 146554                         | (A/T)       |
| 32055       | CadSNP7650     | <i>Desi</i>      | Ca_Desig_Scaffold00448       | 21060                          | (A/T)       |
| 32056       | CadSNP7651     | <i>Desi</i>      | Ca_Desig_Scaffold00448       | 78246                          | (T/C)       |
| 32057       | CadSNP7652     | <i>Desi</i>      | Ca_Desig_Scaffold00448       | 85533                          | (A/T)       |
| 32058       | CadSNP7653     | <i>Desi</i>      | Ca_Desig_Scaffold00448       | 86013                          | (A/G)       |
| 32059       | CadSNP7654     | <i>Desi</i>      | Ca_Desig_Scaffold00448       | 114042                         | (A/G)       |
| 32060       | CadSNP7655     | <i>Desi</i>      | Ca_Desig_Scaffold00448       | 119969                         | (T/G)       |
| 32061       | CadSNP7656     | <i>Desi</i>      | Ca_Desig_Scaffold00448       | 119973                         | (A/G)       |
| 32062       | CadSNP7657     | <i>Desi</i>      | Ca_Desig_Scaffold00448       | 119981                         | (T/G)       |
| 32063       | CadSNP7658     | <i>Desi</i>      | Ca_Desig_Scaffold00448       | 119982                         | (C/T)       |
| 32064       | CadSNP7659     | <i>Desi</i>      | Ca_Desig_Scaffold00448       | 120001                         | (A/G)       |
| 32065       | CadSNP7660     | <i>Desi</i>      | Ca_Desig_Scaffold00448       | 120100                         | (G/T)       |
| 32066       | CadSNP7661     | <i>Desi</i>      | Ca_Desig_Scaffold00448       | 120132                         | (T/C)       |
| 32067       | CadSNP7662     | <i>Desi</i>      | Ca_Desig_Scaffold00448       | 120233                         | (G/T)       |
| 32068       | CadSNP7663     | <i>Desi</i>      | Ca_Desig_Scaffold00448       | 120228                         | (G/A)       |
| 32069       | CadSNP7664     | <i>Desi</i>      | Ca_Desig_Scaffold00448       | 120222                         | (G/T)       |
| 32070       | CadSNP7665     | <i>Desi</i>      | Ca_Desig_Scaffold00448       | 120220                         | (G/A)       |
| 32071       | CadSNP7666     | <i>Desi</i>      | Ca_Desig_Scaffold00448       | 136143                         | (A/G)       |

| <b>S.N.</b> | <b>SNP IDs</b> | <b>Cultivars</b> | <b>Chromosomes/scaffolds</b> | <b>Physical positions (bp)</b> | <b>SNPs</b> |
|-------------|----------------|------------------|------------------------------|--------------------------------|-------------|
| 32072       | CadSNP7667     | <i>Desi</i>      | Ca_Desig_Scaffold00448       | 136173                         | (G/A)       |
| 32073       | CadSNP7668     | <i>Desi</i>      | Ca_Desig_Scaffold00449       | 24152                          | (G/T)       |
| 32074       | CadSNP7669     | <i>Desi</i>      | Ca_Desig_Scaffold00449       | 24155                          | (A/C)       |
| 32075       | CadSNP7670     | <i>Desi</i>      | Ca_Desig_Scaffold00449       | 48037                          | (G/T)       |
| 32076       | CadSNP7671     | <i>Desi</i>      | Ca_Desig_Scaffold00449       | 48005                          | (T/G)       |
| 32077       | CadSNP7672     | <i>Desi</i>      | Ca_Desig_Scaffold00449       | 48106                          | (G/T)       |
| 32078       | CadSNP7673     | <i>Desi</i>      | Ca_Desig_Scaffold00449       | 75954                          | (A/G)       |
| 32079       | CadSNP7674     | <i>Desi</i>      | Ca_Desig_Scaffold00449       | 97070                          | (T/C)       |
| 32080       | CadSNP7675     | <i>Desi</i>      | Ca_Desig_Scaffold00449       | 97011                          | (G/T)       |
| 32081       | CadSNP7676     | <i>Desi</i>      | Ca_Desig_Scaffold00450       | 42553                          | (C/T)       |
| 32082       | CadSNP7677     | <i>Desi</i>      | Ca_Desig_Scaffold00450       | 42691                          | (C/A)       |
| 32083       | CadSNP7678     | <i>Desi</i>      | Ca_Desig_Scaffold00450       | 42711                          | (C/G)       |
| 32084       | CadSNP7679     | <i>Desi</i>      | Ca_Desig_Scaffold00450       | 93887                          | (C/T)       |
| 32085       | CadSNP7680     | <i>Desi</i>      | Ca_Desig_Scaffold00450       | 94223                          | (G/A)       |
| 32086       | CadSNP7681     | <i>Desi</i>      | Ca_Desig_Scaffold00450       | 94187                          | (G/A)       |
| 32087       | CadSNP7682     | <i>Desi</i>      | Ca_Desig_Scaffold00450       | 94182                          | (C/G)       |
| 32088       | CadSNP7683     | <i>Desi</i>      | Ca_Desig_Scaffold00450       | 94267                          | (C/T)       |
| 32089       | CadSNP7684     | <i>Desi</i>      | Ca_Desig_Scaffold00450       | 94265                          | (G/A)       |
| 32090       | CadSNP7685     | <i>Desi</i>      | Ca_Desig_Scaffold00450       | 94358                          | (C/T)       |
| 32091       | CadSNP7686     | <i>Desi</i>      | Ca_Desig_Scaffold00450       | 97973                          | (C/T)       |
| 32092       | CadSNP7687     | <i>Desi</i>      | Ca_Desig_Scaffold00450       | 98008                          | (C/T)       |
| 32093       | CadSNP7688     | <i>Desi</i>      | Ca_Desig_Scaffold00450       | 97990                          | (C/T)       |
| 32094       | CadSNP7689     | <i>Desi</i>      | Ca_Desig_Scaffold00450       | 124388                         | (T/G)       |
| 32095       | CadSNP7690     | <i>Desi</i>      | Ca_Desig_Scaffold00450       | 129149                         | (G/A)       |
| 32096       | CadSNP7691     | <i>Desi</i>      | Ca_Desig_Scaffold00450       | 129143                         | (G/T)       |
| 32097       | CadSNP7692     | <i>Desi</i>      | Ca_Desig_Scaffold00451       | 92323                          | (A/G)       |
| 32098       | CadSNP7693     | <i>Desi</i>      | Ca_Desig_Scaffold00455       | 57553                          | (C/T)       |
| 32099       | CadSNP7694     | <i>Desi</i>      | Ca_Desig_Scaffold00455       | 60528                          | (A/C)       |
| 32100       | CadSNP7695     | <i>Desi</i>      | Ca_Desig_Scaffold00455       | 60541                          | (C/T)       |
| 32101       | CadSNP7696     | <i>Desi</i>      | Ca_Desig_Scaffold00463       | 10298                          | (C/T)       |
| 32102       | CadSNP7697     | <i>Desi</i>      | Ca_Desig_Scaffold00463       | 23002                          | (A/G)       |
| 32103       | CadSNP7698     | <i>Desi</i>      | Ca_Desig_Scaffold00463       | 34405                          | (G/C)       |
| 32104       | CadSNP7699     | <i>Desi</i>      | Ca_Desig_Scaffold00463       | 57798                          | (T/C)       |
| 32105       | CadSNP7700     | <i>Desi</i>      | Ca_Desig_Scaffold00463       | 57850                          | (G/A)       |
| 32106       | CadSNP7701     | <i>Desi</i>      | Ca_Desig_Scaffold00463       | 63202                          | (C/G)       |
| 32107       | CadSNP7702     | <i>Desi</i>      | Ca_Desig_Scaffold00463       | 66352                          | (T/A)       |
| 32108       | CadSNP7703     | <i>Desi</i>      | Ca_Desig_Scaffold00463       | 72141                          | (T/A)       |
| 32109       | CadSNP7704     | <i>Desi</i>      | Ca_Desig_Scaffold00463       | 72382                          | (A/G)       |

| <b>S.N.</b> | <b>SNP IDs</b> | <b>Cultivars</b> | <b>Chromosomes/scaffolds</b> | <b>Physical positions (bp)</b> | <b>SNPs</b> |
|-------------|----------------|------------------|------------------------------|--------------------------------|-------------|
| 32110       | CadSNP7705     | <i>Desi</i>      | Ca_Desig_Scaffold00463       | 72452                          | (A/G)       |
| 32111       | CadSNP7706     | <i>Desi</i>      | Ca_Desig_Scaffold00463       | 123496                         | (G/A)       |
| 32112       | CadSNP7707     | <i>Desi</i>      | Ca_Desig_Scaffold00463       | 123508                         | (C/A)       |
| 32113       | CadSNP7708     | <i>Desi</i>      | Ca_Desig_Scaffold00463       | 149490                         | (T/C)       |
| 32114       | CadSNP7709     | <i>Desi</i>      | Ca_Desig_Scaffold00463       | 149512                         | (T/C)       |
| 32115       | CadSNP7710     | <i>Desi</i>      | Ca_Desig_Scaffold00463       | 149608                         | (A/G)       |
| 32116       | CadSNP7711     | <i>Desi</i>      | Ca_Desig_Scaffold00463       | 149635                         | (A/T)       |
| 32117       | CadSNP7712     | <i>Desi</i>      | Ca_Desig_Scaffold00463       | 153756                         | (C/T)       |
| 32118       | CadSNP7713     | <i>Desi</i>      | Ca_Desig_Scaffold00463       | 153806                         | (A/G)       |
| 32119       | CadSNP7714     | <i>Desi</i>      | Ca_Desig_Scaffold00463       | 162987                         | (T/C)       |
| 32120       | CadSNP7715     | <i>Desi</i>      | Ca_Desig_Scaffold00463       | 162969                         | (C/T)       |
| 32121       | CadSNP7716     | <i>Desi</i>      | Ca_Desig_Scaffold00467       | 27049                          | (A/C)       |
| 32122       | CadSNP7717     | <i>Desi</i>      | Ca_Desig_Scaffold00467       | 27139                          | (A/G)       |
| 32123       | CadSNP7718     | <i>Desi</i>      | Ca_Desig_Scaffold00467       | 58592                          | (G/A)       |
| 32124       | CadSNP7719     | <i>Desi</i>      | Ca_Desig_Scaffold00467       | 78286                          | (A/C)       |
| 32125       | CadSNP7720     | <i>Desi</i>      | Ca_Desig_Scaffold00467       | 116305                         | (A/T)       |
| 32126       | CadSNP7721     | <i>Desi</i>      | Ca_Desig_Scaffold00467       | 131152                         | (T/C)       |
| 32127       | CadSNP7722     | <i>Desi</i>      | Ca_Desig_Scaffold00467       | 131915                         | (A/C)       |
| 32128       | CadSNP7723     | <i>Desi</i>      | Ca_Desig_Scaffold00467       | 131927                         | (G/A)       |
| 32129       | CadSNP7724     | <i>Desi</i>      | Ca_Desig_Scaffold00467       | 132081                         | (T/C)       |
| 32130       | CadSNP7725     | <i>Desi</i>      | Ca_Desig_Scaffold00467       | 143978                         | (T/C)       |
| 32131       | CadSNP7726     | <i>Desi</i>      | Ca_Desig_Scaffold00467       | 148585                         | (T/C)       |
| 32132       | CadSNP7727     | <i>Desi</i>      | Ca_Desig_Scaffold00467       | 148563                         | (T/C)       |
| 32133       | CadSNP7728     | <i>Desi</i>      | Ca_Desig_Scaffold00467       | 148528                         | (A/G)       |
| 32134       | CadSNP7729     | <i>Desi</i>      | Ca_Desig_Scaffold00467       | 148522                         | (T/G)       |
| 32135       | CadSNP7730     | <i>Desi</i>      | Ca_Desig_Scaffold00469       | 19056                          | (T/G)       |
| 32136       | CadSNP7731     | <i>Desi</i>      | Ca_Desig_Scaffold00469       | 19057                          | (G/T)       |
| 32137       | CadSNP7732     | <i>Desi</i>      | Ca_Desig_Scaffold00469       | 47986                          | (A/G)       |
| 32138       | CadSNP7733     | <i>Desi</i>      | Ca_Desig_Scaffold00469       | 47985                          | (C/T)       |
| 32139       | CadSNP7734     | <i>Desi</i>      | Ca_Desig_Scaffold00469       | 49401                          | (T/A)       |
| 32140       | CadSNP7735     | <i>Desi</i>      | Ca_Desig_Scaffold00472       | 129943                         | (T/C)       |
| 32141       | CadSNP7736     | <i>Desi</i>      | Ca_Desig_Scaffold00472       | 129947                         | (G/T)       |
| 32142       | CadSNP7737     | <i>Desi</i>      | Ca_Desig_Scaffold00473       | 13637                          | (G/C)       |
| 32143       | CadSNP7738     | <i>Desi</i>      | Ca_Desig_Scaffold00473       | 18200                          | (T/C)       |
| 32144       | CadSNP7739     | <i>Desi</i>      | Ca_Desig_Scaffold00473       | 54912                          | (A/C)       |
| 32145       | CadSNP7740     | <i>Desi</i>      | Ca_Desig_Scaffold00473       | 83756                          | (C/G)       |
| 32146       | CadSNP7741     | <i>Desi</i>      | Ca_Desig_Scaffold00473       | 100404                         | (C/T)       |
| 32147       | CadSNP7742     | <i>Desi</i>      | Ca_Desig_Scaffold00473       | 122066                         | (A/G)       |



| <b>S.N.</b> | <b>SNP IDs</b> | <b>Cultivars</b> | <b>Chromosomes/scaffolds</b> | <b>Physical positions (bp)</b> | <b>SNPs</b> |
|-------------|----------------|------------------|------------------------------|--------------------------------|-------------|
| 32148       | CadSNP7743     | <i>Desi</i>      | Ca_Desig_Scaffold00473       | 154744                         | (A/T)       |
| 32149       | CadSNP7744     | <i>Desi</i>      | Ca_Desig_Scaffold00473       | 154737                         | (A/G)       |
| 32150       | CadSNP7745     | <i>Desi</i>      | Ca_Desig_Scaffold00473       | 154730                         | (G/A)       |
| 32151       | CadSNP7746     | <i>Desi</i>      | Ca_Desig_Scaffold00473       | 154729                         | (C/G)       |
| 32152       | CadSNP7747     | <i>Desi</i>      | Ca_Desig_Scaffold00473       | 154719                         | (T/C)       |
| 32153       | CadSNP7748     | <i>Desi</i>      | Ca_Desig_Scaffold00473       | 154718                         | (G/A)       |
| 32154       | CadSNP7749     | <i>Desi</i>      | Ca_Desig_Scaffold00473       | 154715                         | (G/A)       |
| 32155       | CadSNP7750     | <i>Desi</i>      | Ca_Desig_Scaffold00473       | 154685                         | (G/T)       |
| 32156       | CadSNP7751     | <i>Desi</i>      | Ca_Desig_Scaffold00473       | 154678                         | (T/G)       |
| 32157       | CadSNP7752     | <i>Desi</i>      | Ca_Desig_Scaffold00473       | 154670                         | (C/T)       |
| 32158       | CadSNP7753     | <i>Desi</i>      | Ca_Desig_Scaffold00473       | 161760                         | (G/A)       |
| 32159       | CadSNP7754     | <i>Desi</i>      | Ca_Desig_Scaffold00473       | 161709                         | (G/A)       |
| 32160       | CadSNP7755     | <i>Desi</i>      | Ca_Desig_Scaffold00476       | 23792                          | (G/A)       |
| 32161       | CadSNP7756     | <i>Desi</i>      | Ca_Desig_Scaffold00476       | 78038                          | (T/G)       |
| 32162       | CadSNP7757     | <i>Desi</i>      | Ca_Desig_Scaffold00476       | 78125                          | (C/T)       |
| 32163       | CadSNP7758     | <i>Desi</i>      | Ca_Desig_Scaffold00476       | 78104                          | (G/A)       |
| 32164       | CadSNP7759     | <i>Desi</i>      | Ca_Desig_Scaffold00476       | 148046                         | (T/C)       |
| 32165       | CadSNP7760     | <i>Desi</i>      | Ca_Desig_Scaffold00476       | 148232                         | (C/T)       |
| 32166       | CadSNP7761     | <i>Desi</i>      | Ca_Desig_Scaffold00476       | 148268                         | (A/G)       |
| 32167       | CadSNP7762     | <i>Desi</i>      | Ca_Desig_Scaffold00477       | 39708                          | (T/C)       |
| 32168       | CadSNP7763     | <i>Desi</i>      | Ca_Desig_Scaffold00477       | 39772                          | (C/T)       |
| 32169       | CadSNP7764     | <i>Desi</i>      | Ca_Desig_Scaffold00477       | 60222                          | (C/T)       |
| 32170       | CadSNP7765     | <i>Desi</i>      | Ca_Desig_Scaffold00477       | 103701                         | (T/A)       |
| 32171       | CadSNP7766     | <i>Desi</i>      | Ca_Desig_Scaffold00477       | 103690                         | (C/T)       |
| 32172       | CadSNP7767     | <i>Desi</i>      | Ca_Desig_Scaffold00477       | 103680                         | (C/T)       |
| 32173       | CadSNP7768     | <i>Desi</i>      | Ca_Desig_Scaffold00477       | 103677                         | (G/A)       |
| 32174       | CadSNP7769     | <i>Desi</i>      | Ca_Desig_Scaffold00477       | 103667                         | (G/C)       |
| 32175       | CadSNP7770     | <i>Desi</i>      | Ca_Desig_Scaffold00477       | 103658                         | (G/A)       |
| 32176       | CadSNP7771     | <i>Desi</i>      | Ca_Desig_Scaffold00477       | 103656                         | (A/G)       |
| 32177       | CadSNP7772     | <i>Desi</i>      | Ca_Desig_Scaffold00477       | 103651                         | (G/A)       |
| 32178       | CadSNP7773     | <i>Desi</i>      | Ca_Desig_Scaffold00477       | 103633                         | (C/T)       |
| 32179       | CadSNP7774     | <i>Desi</i>      | Ca_Desig_Scaffold00477       | 103630                         | (A/C)       |
| 32180       | CadSNP7775     | <i>Desi</i>      | Ca_Desig_Scaffold00477       | 103628                         | (G/T)       |
| 32181       | CadSNP7776     | <i>Desi</i>      | Ca_Desig_Scaffold00477       | 125365                         | (G/A)       |
| 32182       | CadSNP7777     | <i>Desi</i>      | Ca_Desig_Scaffold00477       | 125418                         | (C/A)       |
| 32183       | CadSNP7778     | <i>Desi</i>      | Ca_Desig_Scaffold00477       | 128425                         | (A/G)       |
| 32184       | CadSNP7779     | <i>Desi</i>      | Ca_Desig_Scaffold00477       | 150134                         | (C/T)       |
| 32185       | CadSNP7780     | <i>Desi</i>      | Ca_Desig_Scaffold00478       | 38801                          | (A/G)       |

| <b>S.N.</b> | <b>SNP IDs</b> | <b>Cultivars</b> | <b>Chromosomes/scaffolds</b> | <b>Physical positions (bp)</b> | <b>SNPs</b> |
|-------------|----------------|------------------|------------------------------|--------------------------------|-------------|
| 32186       | CadSNP7781     | <i>Desi</i>      | Ca_Desig_Scaffold00478       | 44771                          | (T/A)       |
| 32187       | CadSNP7782     | <i>Desi</i>      | Ca_Desig_Scaffold00478       | 44829                          | (G/T)       |
| 32188       | CadSNP7783     | <i>Desi</i>      | Ca_Desig_Scaffold00478       | 44944                          | (C/T)       |
| 32189       | CadSNP7784     | <i>Desi</i>      | Ca_Desig_Scaffold00478       | 46877                          | (A/C)       |
| 32190       | CadSNP7785     | <i>Desi</i>      | Ca_Desig_Scaffold00478       | 47614                          | (T/C)       |
| 32191       | CadSNP7786     | <i>Desi</i>      | Ca_Desig_Scaffold00478       | 63560                          | (A/C)       |
| 32192       | CadSNP7787     | <i>Desi</i>      | Ca_Desig_Scaffold00478       | 63877                          | (A/G)       |
| 32193       | CadSNP7788     | <i>Desi</i>      | Ca_Desig_Scaffold00478       | 63920                          | (A/C)       |
| 32194       | CadSNP7789     | <i>Desi</i>      | Ca_Desig_Scaffold00480       | 117291                         | (A/G)       |
| 32195       | CadSNP7790     | <i>Desi</i>      | Ca_Desig_Scaffold00481       | 19803                          | (C/T)       |
| 32196       | CadSNP7791     | <i>Desi</i>      | Ca_Desig_Scaffold00481       | 21001                          | (A/T)       |
| 32197       | CadSNP7792     | <i>Desi</i>      | Ca_Desig_Scaffold00481       | 29600                          | (G/A)       |
| 32198       | CadSNP7793     | <i>Desi</i>      | Ca_Desig_Scaffold00481       | 133155                         | (A/G)       |
| 32199       | CadSNP7794     | <i>Desi</i>      | Ca_Desig_Scaffold00481       | 133384                         | (G/A)       |
| 32200       | CadSNP7795     | <i>Desi</i>      | Ca_Desig_Scaffold00481       | 154947                         | (A/G)       |
| 32201       | CadSNP7796     | <i>Desi</i>      | Ca_Desig_Scaffold00482       | 218987                         | (T/G)       |
| 32202       | CadSNP7797     | <i>Desi</i>      | Ca_Desig_Scaffold00482       | 219010                         | (G/A)       |
| 32203       | CadSNP7798     | <i>Desi</i>      | Ca_Desig_Scaffold00482       | 219035                         | (A/G)       |
| 32204       | CadSNP7799     | <i>Desi</i>      | Ca_Desig_Scaffold00482       | 232319                         | (C/G)       |
| 32205       | CadSNP7800     | <i>Desi</i>      | Ca_Desig_Scaffold00482       | 232272                         | (C/T)       |
| 32206       | CadSNP7801     | <i>Desi</i>      | Ca_Desig_Scaffold00482       | 232566                         | (T/C)       |
| 32207       | CadSNP7802     | <i>Desi</i>      | Ca_Desig_Scaffold00482       | 232573                         | (G/A)       |
| 32208       | CadSNP7803     | <i>Desi</i>      | Ca_Desig_Scaffold00482       | 232677                         | (A/T)       |
| 32209       | CadSNP7804     | <i>Desi</i>      | Ca_Desig_Scaffold00487       | 1982                           | (T/A)       |
| 32210       | CadSNP7805     | <i>Desi</i>      | Ca_Desig_Scaffold00487       | 2425                           | (T/A)       |
| 32211       | CadSNP7806     | <i>Desi</i>      | Ca_Desig_Scaffold00487       | 2540                           | (T/C)       |
| 32212       | CadSNP7807     | <i>Desi</i>      | Ca_Desig_Scaffold00487       | 2522                           | (G/A)       |
| 32213       | CadSNP7808     | <i>Desi</i>      | Ca_Desig_Scaffold00487       | 2492                           | (A/G)       |
| 32214       | CadSNP7809     | <i>Desi</i>      | Ca_Desig_Scaffold00487       | 2490                           | (A/C)       |
| 32215       | CadSNP7810     | <i>Desi</i>      | Ca_Desig_Scaffold00488       | 64537                          | (T/C)       |
| 32216       | CadSNP7811     | <i>Desi</i>      | Ca_Desig_Scaffold00488       | 64664                          | (G/T)       |
| 32217       | CadSNP7812     | <i>Desi</i>      | Ca_Desig_Scaffold00488       | 138651                         | (A/G)       |
| 32218       | CadSNP7813     | <i>Desi</i>      | Ca_Desig_Scaffold00488       | 138674                         | (C/G)       |
| 32219       | CadSNP7814     | <i>Desi</i>      | Ca_Desig_Scaffold00488       | 146617                         | (G/C)       |
| 32220       | CadSNP7815     | <i>Desi</i>      | Ca_Desig_Scaffold00488       | 146692                         | (C/A)       |
| 32221       | CadSNP7816     | <i>Desi</i>      | Ca_Desig_Scaffold00488       | 146690                         | (A/C)       |
| 32222       | CadSNP7817     | <i>Desi</i>      | Ca_Desig_Scaffold00488       | 156236                         | (T/C)       |
| 32223       | CadSNP7818     | <i>Desi</i>      | Ca_Desig_Scaffold00488       | 156237                         | (A/G)       |

| <b>S.N.</b> | <b>SNP IDs</b> | <b>Cultivars</b> | <b>Chromosomes/scaffolds</b> | <b>Physical positions (bp)</b> | <b>SNPs</b> |
|-------------|----------------|------------------|------------------------------|--------------------------------|-------------|
| 32224       | CadSNP7819     | <i>Desi</i>      | Ca_Desig_Scaffold00488       | 156361                         | (T/C)       |
| 32225       | CadSNP7820     | <i>Desi</i>      | Ca_Desig_Scaffold00488       | 159699                         | (C/T)       |
| 32226       | CadSNP7821     | <i>Desi</i>      | Ca_Desig_Scaffold00490       | 29042                          | (T/C)       |
| 32227       | CadSNP7822     | <i>Desi</i>      | Ca_Desig_Scaffold00490       | 29852                          | (T/C)       |
| 32228       | CadSNP7823     | <i>Desi</i>      | Ca_Desig_Scaffold00490       | 29834                          | (G/A)       |
| 32229       | CadSNP7824     | <i>Desi</i>      | Ca_Desig_Scaffold00490       | 67908                          | (G/T)       |
| 32230       | CadSNP7825     | <i>Desi</i>      | Ca_Desig_Scaffold00490       | 67979                          | (A/G)       |
| 32231       | CadSNP7826     | <i>Desi</i>      | Ca_Desig_Scaffold00490       | 98916                          | (A/G)       |
| 32232       | CadSNP7827     | <i>Desi</i>      | Ca_Desig_Scaffold00491       | 30801                          | (G/A)       |
| 32233       | CadSNP7828     | <i>Desi</i>      | Ca_Desig_Scaffold00491       | 30810                          | (C/T)       |
| 32234       | CadSNP7829     | <i>Desi</i>      | Ca_Desig_Scaffold00491       | 32788                          | (G/A)       |
| 32235       | CadSNP7830     | <i>Desi</i>      | Ca_Desig_Scaffold00491       | 33981                          | (T/C)       |
| 32236       | CadSNP7831     | <i>Desi</i>      | Ca_Desig_Scaffold00491       | 35034                          | (G/T)       |
| 32237       | CadSNP7832     | <i>Desi</i>      | Ca_Desig_Scaffold00491       | 35112                          | (C/A)       |
| 32238       | CadSNP7833     | <i>Desi</i>      | Ca_Desig_Scaffold00491       | 74685                          | (A/C)       |
| 32239       | CadSNP7834     | <i>Desi</i>      | Ca_Desig_Scaffold00491       | 149446                         | (C/G)       |
| 32240       | CadSNP7835     | <i>Desi</i>      | Ca_Desig_Scaffold00491       | 155230                         | (A/G)       |
| 32241       | CadSNP7836     | <i>Desi</i>      | Ca_Desig_Scaffold00492       | 8659                           | (A/C)       |
| 32242       | CadSNP7837     | <i>Desi</i>      | Ca_Desig_Scaffold00492       | 140260                         | (C/T)       |
| 32243       | CadSNP7838     | <i>Desi</i>      | Ca_Desig_Scaffold00492       | 140253                         | (A/C)       |
| 32244       | CadSNP7839     | <i>Desi</i>      | Ca_Desig_Scaffold00492       | 140209                         | (A/G)       |
| 32245       | CadSNP7840     | <i>Desi</i>      | Ca_Desig_Scaffold00492       | 140187                         | (G/T)       |
| 32246       | CadSNP7841     | <i>Desi</i>      | Ca_Desig_Scaffold00494       | 2983                           | (T/A)       |
| 32247       | CadSNP7842     | <i>Desi</i>      | Ca_Desig_Scaffold00494       | 29970                          | (C/T)       |
| 32248       | CadSNP7843     | <i>Desi</i>      | Ca_Desig_Scaffold00495       | 33513                          | (C/T)       |
| 32249       | CadSNP7844     | <i>Desi</i>      | Ca_Desig_Scaffold00495       | 64941                          | (A/G)       |
| 32250       | CadSNP7845     | <i>Desi</i>      | Ca_Desig_Scaffold00495       | 65105                          | (G/A)       |
| 32251       | CadSNP7846     | <i>Desi</i>      | Ca_Desig_Scaffold00495       | 65173                          | (A/C)       |
| 32252       | CadSNP7847     | <i>Desi</i>      | Ca_Desig_Scaffold00497       | 59720                          | (T/C)       |
| 32253       | CadSNP7848     | <i>Desi</i>      | Ca_Desig_Scaffold00497       | 59700                          | (T/G)       |
| 32254       | CadSNP7849     | <i>Desi</i>      | Ca_Desig_Scaffold00497       | 59675                          | (C/G)       |
| 32255       | CadSNP7850     | <i>Desi</i>      | Ca_Desig_Scaffold00497       | 60119                          | (A/T)       |
| 32256       | CadSNP7851     | <i>Desi</i>      | Ca_Desig_Scaffold00498       | 12600                          | (C/A)       |
| 32257       | CadSNP7852     | <i>Desi</i>      | Ca_Desig_Scaffold00498       | 12786                          | (A/G)       |
| 32258       | CadSNP7853     | <i>Desi</i>      | Ca_Desig_Scaffold00498       | 12750                          | (A/G)       |
| 32259       | CadSNP7854     | <i>Desi</i>      | Ca_Desig_Scaffold00498       | 12733                          | (C/T)       |
| 32260       | CadSNP7855     | <i>Desi</i>      | Ca_Desig_Scaffold00498       | 47581                          | (A/G)       |
| 32261       | CadSNP7856     | <i>Desi</i>      | Ca_Desig_Scaffold00498       | 140273                         | (C/T)       |

| <b>S.N.</b> | <b>SNP IDs</b> | <b>Cultivars</b> | <b>Chromosomes/scaffolds</b> | <b>Physical positions (bp)</b> | <b>SNPs</b> |
|-------------|----------------|------------------|------------------------------|--------------------------------|-------------|
| 32262       | CadSNP7857     | <i>Desi</i>      | Ca_Desig_Scaffold00498       | 140267                         | (G/A)       |
| 32263       | CadSNP7858     | <i>Desi</i>      | Ca_Desig_Scaffold00498       | 140266                         | (G/A)       |
| 32264       | CadSNP7859     | <i>Desi</i>      | Ca_Desig_Scaffold00498       | 140257                         | (T/C)       |
| 32265       | CadSNP7860     | <i>Desi</i>      | Ca_Desig_Scaffold00498       | 140233                         | (T/G)       |
| 32266       | CadSNP7861     | <i>Desi</i>      | Ca_Desig_Scaffold00498       | 140213                         | (A/T)       |
| 32267       | CadSNP7862     | <i>Desi</i>      | Ca_Desig_Scaffold00498       | 147469                         | (A/G)       |
| 32268       | CadSNP7863     | <i>Desi</i>      | Ca_Desig_Scaffold00498       | 147462                         | (A/G)       |
| 32269       | CadSNP7864     | <i>Desi</i>      | Ca_Desig_Scaffold00500       | 150562                         | (A/C)       |
| 32270       | CadSNP7865     | <i>Desi</i>      | Ca_Desig_Scaffold00501       | 138782                         | (A/T)       |
| 32271       | CadSNP7866     | <i>Desi</i>      | Ca_Desig_Scaffold00502       | 71414                          | (C/A)       |
| 32272       | CadSNP7867     | <i>Desi</i>      | Ca_Desig_Scaffold00502       | 89574                          | (C/T)       |
| 32273       | CadSNP7868     | <i>Desi</i>      | Ca_Desig_Scaffold00505       | 41815                          | (C/A)       |
| 32274       | CadSNP7869     | <i>Desi</i>      | Ca_Desig_Scaffold00505       | 41794                          | (T/A)       |
| 32275       | CadSNP7870     | <i>Desi</i>      | Ca_Desig_Scaffold00505       | 41793                          | (T/A)       |
| 32276       | CadSNP7871     | <i>Desi</i>      | Ca_Desig_Scaffold00505       | 41845                          | (G/T)       |
| 32277       | CadSNP7872     | <i>Desi</i>      | Ca_Desig_Scaffold00505       | 65086                          | (G/T)       |
| 32278       | CadSNP7873     | <i>Desi</i>      | Ca_Desig_Scaffold00505       | 65085                          | (G/C)       |
| 32279       | CadSNP7874     | <i>Desi</i>      | Ca_Desig_Scaffold00505       | 134420                         | (T/G)       |
| 32280       | CadSNP7875     | <i>Desi</i>      | Ca_Desig_Scaffold00509       | 12278                          | (C/T)       |
| 32281       | CadSNP7876     | <i>Desi</i>      | Ca_Desig_Scaffold00509       | 12428                          | (T/A)       |
| 32282       | CadSNP7877     | <i>Desi</i>      | Ca_Desig_Scaffold00509       | 60177                          | (T/C)       |
| 32283       | CadSNP7878     | <i>Desi</i>      | Ca_Desig_Scaffold00509       | 60183                          | (A/C)       |
| 32284       | CadSNP7879     | <i>Desi</i>      | Ca_Desig_Scaffold00509       | 82010                          | (A/C)       |
| 32285       | CadSNP7880     | <i>Desi</i>      | Ca_Desig_Scaffold00509       | 82804                          | (G/C)       |
| 32286       | CadSNP7881     | <i>Desi</i>      | Ca_Desig_Scaffold00509       | 82988                          | (G/T)       |
| 32287       | CadSNP7882     | <i>Desi</i>      | Ca_Desig_Scaffold00509       | 82966                          | (T/C)       |
| 32288       | CadSNP7883     | <i>Desi</i>      | Ca_Desig_Scaffold00509       | 82944                          | (T/C)       |
| 32289       | CadSNP7884     | <i>Desi</i>      | Ca_Desig_Scaffold00509       | 82918                          | (C/T)       |
| 32290       | CadSNP7885     | <i>Desi</i>      | Ca_Desig_Scaffold00509       | 83132                          | (C/T)       |
| 32291       | CadSNP7886     | <i>Desi</i>      | Ca_Desig_Scaffold00509       | 83115                          | (C/A)       |
| 32292       | CadSNP7887     | <i>Desi</i>      | Ca_Desig_Scaffold00509       | 83114                          | (G/A)       |
| 32293       | CadSNP7888     | <i>Desi</i>      | Ca_Desig_Scaffold00509       | 83072                          | (G/A)       |
| 32294       | CadSNP7889     | <i>Desi</i>      | Ca_Desig_Scaffold00509       | 99770                          | (T/C)       |
| 32295       | CadSNP7890     | <i>Desi</i>      | Ca_Desig_Scaffold00509       | 99778                          | (T/C)       |
| 32296       | CadSNP7891     | <i>Desi</i>      | Ca_Desig_Scaffold00510       | 19740                          | (T/C)       |
| 32297       | CadSNP7892     | <i>Desi</i>      | Ca_Desig_Scaffold00510       | 147592                         | (T/A)       |
| 32298       | CadSNP7893     | <i>Desi</i>      | Ca_Desig_Scaffold00514       | 179145                         | (T/C)       |
| 32299       | CadSNP7894     | <i>Desi</i>      | Ca_Desig_Scaffold00514       | 179343                         | (A/T)       |

| <b>S.N.</b> | <b>SNP IDs</b> | <b>Cultivars</b> | <b>Chromosomes/scaffolds</b> | <b>Physical positions (bp)</b> | <b>SNPs</b> |
|-------------|----------------|------------------|------------------------------|--------------------------------|-------------|
| 32300       | CadSNP7895     | <i>Desi</i>      | Ca_Desig_Scaffold00514       | 195469                         | (C/T)       |
| 32301       | CadSNP7896     | <i>Desi</i>      | Ca_Desig_Scaffold00514       | 206722                         | (T/C)       |
| 32302       | CadSNP7897     | <i>Desi</i>      | Ca_Desig_Scaffold00514       | 206826                         | (T/C)       |
| 32303       | CadSNP7898     | <i>Desi</i>      | Ca_Desig_Scaffold00514       | 208600                         | (G/A)       |
| 32304       | CadSNP7899     | <i>Desi</i>      | Ca_Desig_Scaffold00514       | 232024                         | (C/G)       |
| 32305       | CadSNP7900     | <i>Desi</i>      | Ca_Desig_Scaffold00514       | 284523                         | (A/T)       |
| 32306       | CadSNP7901     | <i>Desi</i>      | Ca_Desig_Scaffold00515       | 76618                          | (A/C)       |
| 32307       | CadSNP7902     | <i>Desi</i>      | Ca_Desig_Scaffold00515       | 80348                          | (C/T)       |
| 32308       | CadSNP7903     | <i>Desi</i>      | Ca_Desig_Scaffold00515       | 134200                         | (C/T)       |
| 32309       | CadSNP7904     | <i>Desi</i>      | Ca_Desig_Scaffold00518       | 51818                          | (A/T)       |
| 32310       | CadSNP7905     | <i>Desi</i>      | Ca_Desig_Scaffold00518       | 51820                          | (T/A)       |
| 32311       | CadSNP7906     | <i>Desi</i>      | Ca_Desig_Scaffold00518       | 51835                          | (T/A)       |
| 32312       | CadSNP7907     | <i>Desi</i>      | Ca_Desig_Scaffold00518       | 51837                          | (A/T)       |
| 32313       | CadSNP7908     | <i>Desi</i>      | Ca_Desig_Scaffold00518       | 51840                          | (G/T)       |
| 32314       | CadSNP7909     | <i>Desi</i>      | Ca_Desig_Scaffold00518       | 51848                          | (A/T)       |
| 32315       | CadSNP7910     | <i>Desi</i>      | Ca_Desig_Scaffold00518       | 56760                          | (G/A)       |
| 32316       | CadSNP7911     | <i>Desi</i>      | Ca_Desig_Scaffold00518       | 68905                          | (T/G)       |
| 32317       | CadSNP7912     | <i>Desi</i>      | Ca_Desig_Scaffold00518       | 68959                          | (T/A)       |
| 32318       | CadSNP7913     | <i>Desi</i>      | Ca_Desig_Scaffold00518       | 69001                          | (G/A)       |
| 32319       | CadSNP7914     | <i>Desi</i>      | Ca_Desig_Scaffold00518       | 68986                          | (T/C)       |
| 32320       | CadSNP7915     | <i>Desi</i>      | Ca_Desig_Scaffold00518       | 68976                          | (T/G)       |
| 32321       | CadSNP7916     | <i>Desi</i>      | Ca_Desig_Scaffold00518       | 68974                          | (T/A)       |
| 32322       | CadSNP7917     | <i>Desi</i>      | Ca_Desig_Scaffold00518       | 68947                          | (A/G)       |
| 32323       | CadSNP7918     | <i>Desi</i>      | Ca_Desig_Scaffold00518       | 68923                          | (A/G)       |
| 32324       | CadSNP7919     | <i>Desi</i>      | Ca_Desig_Scaffold00518       | 123875                         | (G/A)       |
| 32325       | CadSNP7920     | <i>Desi</i>      | Ca_Desig_Scaffold00519       | 113703                         | (A/C)       |
| 32326       | CadSNP7921     | <i>Desi</i>      | Ca_Desig_Scaffold00519       | 114593                         | (C/T)       |
| 32327       | CadSNP7922     | <i>Desi</i>      | Ca_Desig_Scaffold00520       | 121826                         | (C/A)       |
| 32328       | CadSNP7923     | <i>Desi</i>      | Ca_Desig_Scaffold00520       | 121863                         | (G/C)       |
| 32329       | CadSNP7924     | <i>Desi</i>      | Ca_Desig_Scaffold00520       | 121868                         | (G/A)       |
| 32330       | CadSNP7925     | <i>Desi</i>      | Ca_Desig_Scaffold00520       | 121871                         | (C/T)       |
| 32331       | CadSNP7926     | <i>Desi</i>      | Ca_Desig_Scaffold00520       | 121892                         | (C/T)       |
| 32332       | CadSNP7927     | <i>Desi</i>      | Ca_Desig_Scaffold00520       | 132521                         | (C/T)       |
| 32333       | CadSNP7928     | <i>Desi</i>      | Ca_Desig_Scaffold00521       | 59239                          | (G/A)       |
| 32334       | CadSNP7929     | <i>Desi</i>      | Ca_Desig_Scaffold00521       | 67041                          | (C/T)       |
| 32335       | CadSNP7930     | <i>Desi</i>      | Ca_Desig_Scaffold00522       | 1339                           | (A/T)       |
| 32336       | CadSNP7931     | <i>Desi</i>      | Ca_Desig_Scaffold00522       | 1828                           | (G/A)       |
| 32337       | CadSNP7932     | <i>Desi</i>      | Ca_Desig_Scaffold00522       | 1753                           | (A/C)       |

| <b>S.N.</b> | <b>SNP IDs</b> | <b>Cultivars</b> | <b>Chromosomes/scaffolds</b> | <b>Physical positions (bp)</b> | <b>SNPs</b> |
|-------------|----------------|------------------|------------------------------|--------------------------------|-------------|
| 32338       | CadSNP7933     | <i>Desi</i>      | Ca_Desig_Scaffold00522       | 1870                           | (A/G)       |
| 32339       | CadSNP7934     | <i>Desi</i>      | Ca_Desig_Scaffold00522       | 1955                           | (C/A)       |
| 32340       | CadSNP7935     | <i>Desi</i>      | Ca_Desig_Scaffold00522       | 1954                           | (A/C)       |
| 32341       | CadSNP7936     | <i>Desi</i>      | Ca_Desig_Scaffold00522       | 1948                           | (A/C)       |
| 32342       | CadSNP7937     | <i>Desi</i>      | Ca_Desig_Scaffold00522       | 1947                           | (A/T)       |
| 32343       | CadSNP7938     | <i>Desi</i>      | Ca_Desig_Scaffold00522       | 1946                           | (T/A)       |
| 32344       | CadSNP7939     | <i>Desi</i>      | Ca_Desig_Scaffold00522       | 1939                           | (A/C)       |
| 32345       | CadSNP7940     | <i>Desi</i>      | Ca_Desig_Scaffold00522       | 1932                           | (A/C)       |
| 32346       | CadSNP7941     | <i>Desi</i>      | Ca_Desig_Scaffold00522       | 1911                           | (T/C)       |
| 32347       | CadSNP7942     | <i>Desi</i>      | Ca_Desig_Scaffold00522       | 1904                           | (G/A)       |
| 32348       | CadSNP7943     | <i>Desi</i>      | Ca_Desig_Scaffold00522       | 2007                           | (A/C)       |
| 32349       | CadSNP7944     | <i>Desi</i>      | Ca_Desig_Scaffold00522       | 2016                           | (A/C)       |
| 32350       | CadSNP7945     | <i>Desi</i>      | Ca_Desig_Scaffold00522       | 25634                          | (G/T)       |
| 32351       | CadSNP7946     | <i>Desi</i>      | Ca_Desig_Scaffold00522       | 26143                          | (C/A)       |
| 32352       | CadSNP7947     | <i>Desi</i>      | Ca_Desig_Scaffold00522       | 26113                          | (C/T)       |
| 32353       | CadSNP7948     | <i>Desi</i>      | Ca_Desig_Scaffold00522       | 26290                          | (C/T)       |
| 32354       | CadSNP7949     | <i>Desi</i>      | Ca_Desig_Scaffold00522       | 49205                          | (A/T)       |
| 32355       | CadSNP7950     | <i>Desi</i>      | Ca_Desig_Scaffold00522       | 49226                          | (T/G)       |
| 32356       | CadSNP7951     | <i>Desi</i>      | Ca_Desig_Scaffold00522       | 49227                          | (G/T)       |
| 32357       | CadSNP7952     | <i>Desi</i>      | Ca_Desig_Scaffold00522       | 49232                          | (A/G)       |
| 32358       | CadSNP7953     | <i>Desi</i>      | Ca_Desig_Scaffold00522       | 49233                          | (T/A)       |
| 32359       | CadSNP7954     | <i>Desi</i>      | Ca_Desig_Scaffold00522       | 49236                          | (G/A)       |
| 32360       | CadSNP7955     | <i>Desi</i>      | Ca_Desig_Scaffold00522       | 49237                          | (T/G)       |
| 32361       | CadSNP7956     | <i>Desi</i>      | Ca_Desig_Scaffold00522       | 49248                          | (C/T)       |
| 32362       | CadSNP7957     | <i>Desi</i>      | Ca_Desig_Scaffold00522       | 49259                          | (C/A)       |
| 32363       | CadSNP7958     | <i>Desi</i>      | Ca_Desig_Scaffold00522       | 49279                          | (C/T)       |
| 32364       | CadSNP7959     | <i>Desi</i>      | Ca_Desig_Scaffold00522       | 49334                          | (G/A)       |
| 32365       | CadSNP7960     | <i>Desi</i>      | Ca_Desig_Scaffold00522       | 49309                          | (G/T)       |
| 32366       | CadSNP7961     | <i>Desi</i>      | Ca_Desig_Scaffold00522       | 49294                          | (G/T)       |
| 32367       | CadSNP7962     | <i>Desi</i>      | Ca_Desig_Scaffold00522       | 50463                          | (C/G)       |
| 32368       | CadSNP7963     | <i>Desi</i>      | Ca_Desig_Scaffold00522       | 50452                          | (C/T)       |
| 32369       | CadSNP7964     | <i>Desi</i>      | Ca_Desig_Scaffold00522       | 52216                          | (A/G)       |
| 32370       | CadSNP7965     | <i>Desi</i>      | Ca_Desig_Scaffold00522       | 53225                          | (G/C)       |
| 32371       | CadSNP7966     | <i>Desi</i>      | Ca_Desig_Scaffold00522       | 53230                          | (T/G)       |
| 32372       | CadSNP7967     | <i>Desi</i>      | Ca_Desig_Scaffold00522       | 53234                          | (A/G)       |
| 32373       | CadSNP7968     | <i>Desi</i>      | Ca_Desig_Scaffold00522       | 53240                          | (A/G)       |
| 32374       | CadSNP7969     | <i>Desi</i>      | Ca_Desig_Scaffold00522       | 53242                          | (T/G)       |
| 32375       | CadSNP7970     | <i>Desi</i>      | Ca_Desig_Scaffold00522       | 53244                          | (T/C)       |

| <b>S.N.</b> | <b>SNP IDs</b> | <b>Cultivars</b> | <b>Chromosomes/scaffolds</b> | <b>Physical positions (bp)</b> | <b>SNPs</b> |
|-------------|----------------|------------------|------------------------------|--------------------------------|-------------|
| 32376       | CadSNP7971     | <i>Desi</i>      | Ca_Desig_Scaffold00522       | 53246                          | (G/A)       |
| 32377       | CadSNP7972     | <i>Desi</i>      | Ca_Desig_Scaffold00522       | 53252                          | (A/G)       |
| 32378       | CadSNP7973     | <i>Desi</i>      | Ca_Desig_Scaffold00522       | 53288                          | (G/A)       |
| 32379       | CadSNP7974     | <i>Desi</i>      | Ca_Desig_Scaffold00522       | 53431                          | (G/C)       |
| 32380       | CadSNP7975     | <i>Desi</i>      | Ca_Desig_Scaffold00522       | 53409                          | (G/C)       |
| 32381       | CadSNP7976     | <i>Desi</i>      | Ca_Desig_Scaffold00522       | 53405                          | (G/C)       |
| 32382       | CadSNP7977     | <i>Desi</i>      | Ca_Desig_Scaffold00522       | 73684                          | (G/A)       |
| 32383       | CadSNP7978     | <i>Desi</i>      | Ca_Desig_Scaffold00522       | 73696                          | (T/G)       |
| 32384       | CadSNP7979     | <i>Desi</i>      | Ca_Desig_Scaffold00522       | 73701                          | (A/G)       |
| 32385       | CadSNP7980     | <i>Desi</i>      | Ca_Desig_Scaffold00522       | 73714                          | (T/G)       |
| 32386       | CadSNP7981     | <i>Desi</i>      | Ca_Desig_Scaffold00522       | 73716                          | (A/G)       |
| 32387       | CadSNP7982     | <i>Desi</i>      | Ca_Desig_Scaffold00522       | 73720                          | (A/T)       |
| 32388       | CadSNP7983     | <i>Desi</i>      | Ca_Desig_Scaffold00522       | 102150                         | (T/A)       |
| 32389       | CadSNP7984     | <i>Desi</i>      | Ca_Desig_Scaffold00522       | 102142                         | (A/T)       |
| 32390       | CadSNP7985     | <i>Desi</i>      | Ca_Desig_Scaffold00522       | 102118                         | (A/T)       |
| 32391       | CadSNP7986     | <i>Desi</i>      | Ca_Desig_Scaffold00522       | 102222                         | (G/C)       |
| 32392       | CadSNP7987     | <i>Desi</i>      | Ca_Desig_Scaffold00522       | 102227                         | (T/C)       |
| 32393       | CadSNP7988     | <i>Desi</i>      | Ca_Desig_Scaffold00522       | 102231                         | (C/T)       |
| 32394       | CadSNP7989     | <i>Desi</i>      | Ca_Desig_Scaffold00522       | 102238                         | (T/A)       |
| 32395       | CadSNP7990     | <i>Desi</i>      | Ca_Desig_Scaffold00522       | 102239                         | (A/C)       |
| 32396       | CadSNP7991     | <i>Desi</i>      | Ca_Desig_Scaffold00522       | 103281                         | (T/C)       |
| 32397       | CadSNP7992     | <i>Desi</i>      | Ca_Desig_Scaffold00522       | 103284                         | (G/A)       |
| 32398       | CadSNP7993     | <i>Desi</i>      | Ca_Desig_Scaffold00522       | 103291                         | (C/A)       |
| 32399       | CadSNP7994     | <i>Desi</i>      | Ca_Desig_Scaffold00522       | 103292                         | (G/A)       |
| 32400       | CadSNP7995     | <i>Desi</i>      | Ca_Desig_Scaffold00522       | 103302                         | (C/T)       |
| 32401       | CadSNP7996     | <i>Desi</i>      | Ca_Desig_Scaffold00522       | 105154                         | (A/C)       |
| 32402       | CadSNP7997     | <i>Desi</i>      | Ca_Desig_Scaffold00522       | 105163                         | (G/T)       |
| 32403       | CadSNP7998     | <i>Desi</i>      | Ca_Desig_Scaffold00522       | 105171                         | (T/G)       |
| 32404       | CadSNP7999     | <i>Desi</i>      | Ca_Desig_Scaffold00522       | 105144                         | (C/T)       |
| 32405       | CadSNP8000     | <i>Desi</i>      | Ca_Desig_Scaffold00522       | 105172                         | (A/C)       |
| 32406       | CadSNP8001     | <i>Desi</i>      | Ca_Desig_Scaffold00522       | 105182                         | (A/G)       |
| 32407       | CadSNP8002     | <i>Desi</i>      | Ca_Desig_Scaffold00522       | 105202                         | (C/T)       |
| 32408       | CadSNP8003     | <i>Desi</i>      | Ca_Desig_Scaffold00522       | 105324                         | (A/T)       |
| 32409       | CadSNP8004     | <i>Desi</i>      | Ca_Desig_Scaffold00522       | 105312                         | (C/T)       |
| 32410       | CadSNP8005     | <i>Desi</i>      | Ca_Desig_Scaffold00522       | 105310                         | (G/A)       |
| 32411       | CadSNP8006     | <i>Desi</i>      | Ca_Desig_Scaffold00522       | 105308                         | (A/C)       |
| 32412       | CadSNP8007     | <i>Desi</i>      | Ca_Desig_Scaffold00522       | 105302                         | (A/T)       |
| 32413       | CadSNP8008     | <i>Desi</i>      | Ca_Desig_Scaffold00522       | 105301                         | (G/C)       |

| <b>S.N.</b> | <b>SNP IDs</b> | <b>Cultivars</b> | <b>Chromosomes/scaffolds</b> | <b>Physical positions (bp)</b> | <b>SNPs</b> |
|-------------|----------------|------------------|------------------------------|--------------------------------|-------------|
| 32414       | CadSNP8009     | <i>Desi</i>      | Ca_Desig_Scaffold00522       | 105297                         | (T/A)       |
| 32415       | CadSNP8010     | <i>Desi</i>      | Ca_Desig_Scaffold00522       | 105296                         | (G/T)       |
| 32416       | CadSNP8011     | <i>Desi</i>      | Ca_Desig_Scaffold00522       | 105278                         | (C/T)       |
| 32417       | CadSNP8012     | <i>Desi</i>      | Ca_Desig_Scaffold00522       | 105273                         | (A/G)       |
| 32418       | CadSNP8013     | <i>Desi</i>      | Ca_Desig_Scaffold00522       | 105271                         | (T/C)       |
| 32419       | CadSNP8014     | <i>Desi</i>      | Ca_Desig_Scaffold00522       | 105652                         | (T/C)       |
| 32420       | CadSNP8015     | <i>Desi</i>      | Ca_Desig_Scaffold00522       | 105654                         | (C/T)       |
| 32421       | CadSNP8016     | <i>Desi</i>      | Ca_Desig_Scaffold00522       | 105677                         | (T/G)       |
| 32422       | CadSNP8017     | <i>Desi</i>      | Ca_Desig_Scaffold00522       | 105694                         | (C/A)       |
| 32423       | CadSNP8018     | <i>Desi</i>      | Ca_Desig_Scaffold00522       | 115530                         | (C/G)       |
| 32424       | CadSNP8019     | <i>Desi</i>      | Ca_Desig_Scaffold00522       | 115535                         | (T/G)       |
| 32425       | CadSNP8020     | <i>Desi</i>      | Ca_Desig_Scaffold00522       | 115550                         | (G/T)       |
| 32426       | CadSNP8021     | <i>Desi</i>      | Ca_Desig_Scaffold00522       | 115563                         | (G/A)       |
| 32427       | CadSNP8022     | <i>Desi</i>      | Ca_Desig_Scaffold00536       | 22630                          | (A/G)       |
| 32428       | CadSNP8023     | <i>Desi</i>      | Ca_Desig_Scaffold00536       | 22679                          | (A/T)       |
| 32429       | CadSNP8024     | <i>Desi</i>      | Ca_Desig_Scaffold00536       | 22703                          | (C/T)       |
| 32430       | CadSNP8025     | <i>Desi</i>      | Ca_Desig_Scaffold00536       | 63236                          | (G/C)       |
| 32431       | CadSNP8026     | <i>Desi</i>      | Ca_Desig_Scaffold00538       | 5026                           | (T/G)       |
| 32432       | CadSNP8027     | <i>Desi</i>      | Ca_Desig_Scaffold00538       | 96723                          | (G/A)       |
| 32433       | CadSNP8028     | <i>Desi</i>      | Ca_Desig_Scaffold00538       | 99169                          | (G/A)       |
| 32434       | CadSNP8029     | <i>Desi</i>      | Ca_Desig_Scaffold00538       | 99174                          | (T/C)       |
| 32435       | CadSNP8030     | <i>Desi</i>      | Ca_Desig_Scaffold00538       | 99203                          | (A/T)       |
| 32436       | CadSNP8031     | <i>Desi</i>      | Ca_Desig_Scaffold00538       | 99209                          | (T/C)       |
| 32437       | CadSNP8032     | <i>Desi</i>      | Ca_Desig_Scaffold00538       | 99219                          | (C/T)       |
| 32438       | CadSNP8033     | <i>Desi</i>      | Ca_Desig_Scaffold00538       | 99223                          | (C/A)       |
| 32439       | CadSNP8034     | <i>Desi</i>      | Ca_Desig_Scaffold00538       | 99227                          | (C/A)       |
| 32440       | CadSNP8035     | <i>Desi</i>      | Ca_Desig_Scaffold00538       | 99230                          | (C/A)       |
| 32441       | CadSNP8036     | <i>Desi</i>      | Ca_Desig_Scaffold00538       | 99238                          | (A/G)       |
| 32442       | CadSNP8037     | <i>Desi</i>      | Ca_Desig_Scaffold00538       | 99242                          | (T/G)       |
| 32443       | CadSNP8038     | <i>Desi</i>      | Ca_Desig_Scaffold00538       | 99245                          | (T/C)       |
| 32444       | CadSNP8039     | <i>Desi</i>      | Ca_Desig_Scaffold00538       | 99252                          | (C/T)       |
| 32445       | CadSNP8040     | <i>Desi</i>      | Ca_Desig_Scaffold00538       | 99254                          | (T/A)       |
| 32446       | CadSNP8041     | <i>Desi</i>      | Ca_Desig_Scaffold00539       | 39144                          | (T/G)       |
| 32447       | CadSNP8042     | <i>Desi</i>      | Ca_Desig_Scaffold00539       | 39150                          | (T/G)       |
| 32448       | CadSNP8043     | <i>Desi</i>      | Ca_Desig_Scaffold00539       | 137472                         | (A/G)       |
| 32449       | CadSNP8044     | <i>Desi</i>      | Ca_Desig_Scaffold00539       | 137598                         | (A/G)       |
| 32450       | CadSNP8045     | <i>Desi</i>      | Ca_Desig_Scaffold00539       | 137693                         | (C/A)       |
| 32451       | CadSNP8046     | <i>Desi</i>      | Ca_Desig_Scaffold00541       | 97535                          | (G/A)       |



| <b>S.N.</b> | <b>SNP IDs</b> | <b>Cultivars</b> | <b>Chromosomes/scaffolds</b> | <b>Physical positions (bp)</b> | <b>SNPs</b> |
|-------------|----------------|------------------|------------------------------|--------------------------------|-------------|
| 32452       | CadSNP8047     | <i>Desi</i>      | Ca_Desig_Scaffold00541       | 98222                          | (A/G)       |
| 32453       | CadSNP8048     | <i>Desi</i>      | Ca_Desig_Scaffold00541       | 111286                         | (T/G)       |
| 32454       | CadSNP8049     | <i>Desi</i>      | Ca_Desig_Scaffold00541       | 117425                         | (G/T)       |
| 32455       | CadSNP8050     | <i>Desi</i>      | Ca_Desig_Scaffold00541       | 117615                         | (A/C)       |
| 32456       | CadSNP8051     | <i>Desi</i>      | Ca_Desig_Scaffold00541       | 119744                         | (A/C)       |
| 32457       | CadSNP8052     | <i>Desi</i>      | Ca_Desig_Scaffold00541       | 119782                         | (T/G)       |
| 32458       | CadSNP8053     | <i>Desi</i>      | Ca_Desig_Scaffold00541       | 119808                         | (G/A)       |
| 32459       | CadSNP8054     | <i>Desi</i>      | Ca_Desig_Scaffold00541       | 119780                         | (G/A)       |
| 32460       | CadSNP8055     | <i>Desi</i>      | Ca_Desig_Scaffold00544       | 1653                           | (T/G)       |
| 32461       | CadSNP8056     | <i>Desi</i>      | Ca_Desig_Scaffold00544       | 1634                           | (G/C)       |
| 32462       | CadSNP8057     | <i>Desi</i>      | Ca_Desig_Scaffold00544       | 24331                          | (G/A)       |
| 32463       | CadSNP8058     | <i>Desi</i>      | Ca_Desig_Scaffold00544       | 54797                          | (C/T)       |
| 32464       | CadSNP8059     | <i>Desi</i>      | Ca_Desig_Scaffold00544       | 93393                          | (T/C)       |
| 32465       | CadSNP8060     | <i>Desi</i>      | Ca_Desig_Scaffold00544       | 141217                         | (G/A)       |
| 32466       | CadSNP8061     | <i>Desi</i>      | Ca_Desig_Scaffold00549       | 12425                          | (C/G)       |
| 32467       | CadSNP8062     | <i>Desi</i>      | Ca_Desig_Scaffold00549       | 74132                          | (T/A)       |
| 32468       | CadSNP8063     | <i>Desi</i>      | Ca_Desig_Scaffold00549       | 110953                         | (A/C)       |
| 32469       | CadSNP8064     | <i>Desi</i>      | Ca_Desig_Scaffold00549       | 114481                         | (T/G)       |
| 32470       | CadSNP8065     | <i>Desi</i>      | Ca_Desig_Scaffold00551       | 11298                          | (G/C)       |
| 32471       | CadSNP8066     | <i>Desi</i>      | Ca_Desig_Scaffold00551       | 30709                          | (C/G)       |
| 32472       | CadSNP8067     | <i>Desi</i>      | Ca_Desig_Scaffold00551       | 114290                         | (A/G)       |
| 32473       | CadSNP8068     | <i>Desi</i>      | Ca_Desig_Scaffold00553       | 105049                         | (A/G)       |
| 32474       | CadSNP8069     | <i>Desi</i>      | Ca_Desig_Scaffold00553       | 105067                         | (A/G)       |
| 32475       | CadSNP8070     | <i>Desi</i>      | Ca_Desig_Scaffold00553       | 107497                         | (C/T)       |
| 32476       | CadSNP8071     | <i>Desi</i>      | Ca_Desig_Scaffold00553       | 107552                         | (T/C)       |
| 32477       | CadSNP8072     | <i>Desi</i>      | Ca_Desig_Scaffold00553       | 138943                         | (A/G)       |
| 32478       | CadSNP8073     | <i>Desi</i>      | Ca_Desig_Scaffold00553       | 139126                         | (A/C)       |
| 32479       | CadSNP8074     | <i>Desi</i>      | Ca_Desig_Scaffold00555       | 37431                          | (G/A)       |
| 32480       | CadSNP8075     | <i>Desi</i>      | Ca_Desig_Scaffold00555       | 37433                          | (C/T)       |
| 32481       | CadSNP8076     | <i>Desi</i>      | Ca_Desig_Scaffold00555       | 37482                          | (G/T)       |
| 32482       | CadSNP8077     | <i>Desi</i>      | Ca_Desig_Scaffold00555       | 61536                          | (C/T)       |
| 32483       | CadSNP8078     | <i>Desi</i>      | Ca_Desig_Scaffold00557       | 58386                          | (C/T)       |
| 32484       | CadSNP8079     | <i>Desi</i>      | Ca_Desig_Scaffold00557       | 58634                          | (G/A)       |
| 32485       | CadSNP8080     | <i>Desi</i>      | Ca_Desig_Scaffold00557       | 58678                          | (G/T)       |
| 32486       | CadSNP8081     | <i>Desi</i>      | Ca_Desig_Scaffold00557       | 82422                          | (T/C)       |
| 32487       | CadSNP8082     | <i>Desi</i>      | Ca_Desig_Scaffold00557       | 82428                          | (T/A)       |
| 32488       | CadSNP8083     | <i>Desi</i>      | Ca_Desig_Scaffold00557       | 82473                          | (A/G)       |
| 32489       | CadSNP8084     | <i>Desi</i>      | Ca_Desig_Scaffold00557       | 82475                          | (G/A)       |

| <b>S.N.</b> | <b>SNP IDs</b> | <b>Cultivars</b> | <b>Chromosomes/scaffolds</b> | <b>Physical positions (bp)</b> | <b>SNPs</b> |
|-------------|----------------|------------------|------------------------------|--------------------------------|-------------|
| 32490       | CadSNP8085     | <i>Desi</i>      | Ca_Desig_Scaffold00557       | 82488                          | (A/G)       |
| 32491       | CadSNP8086     | <i>Desi</i>      | Ca_Desig_Scaffold00557       | 82490                          | (C/G)       |
| 32492       | CadSNP8087     | <i>Desi</i>      | Ca_Desig_Scaffold00557       | 90853                          | (T/A)       |
| 32493       | CadSNP8088     | <i>Desi</i>      | Ca_Desig_Scaffold00557       | 135532                         | (G/C)       |
| 32494       | CadSNP8089     | <i>Desi</i>      | Ca_Desig_Scaffold00558       | 107886                         | (C/A)       |
| 32495       | CadSNP8090     | <i>Desi</i>      | Ca_Desig_Scaffold00558       | 107924                         | (A/T)       |
| 32496       | CadSNP8091     | <i>Desi</i>      | Ca_Desig_Scaffold00558       | 108043                         | (A/G)       |
| 32497       | CadSNP8092     | <i>Desi</i>      | Ca_Desig_Scaffold00558       | 121479                         | (G/A)       |
| 32498       | CadSNP8093     | <i>Desi</i>      | Ca_Desig_Scaffold00558       | 147385                         | (A/C)       |
| 32499       | CadSNP8094     | <i>Desi</i>      | Ca_Desig_Scaffold00559       | 70876                          | (T/G)       |
| 32500       | CadSNP8095     | <i>Desi</i>      | Ca_Desig_Scaffold00559       | 70848                          | (A/G)       |
| 32501       | CadSNP8096     | <i>Desi</i>      | Ca_Desig_Scaffold00559       | 70841                          | (C/A)       |
| 32502       | CadSNP8097     | <i>Desi</i>      | Ca_Desig_Scaffold00559       | 70836                          | (C/G)       |
| 32503       | CadSNP8098     | <i>Desi</i>      | Ca_Desig_Scaffold00559       | 70822                          | (G/A)       |
| 32504       | CadSNP8099     | <i>Desi</i>      | Ca_Desig_Scaffold00559       | 70801                          | (C/T)       |
| 32505       | CadSNP8100     | <i>Desi</i>      | Ca_Desig_Scaffold00568       | 37349                          | (T/C)       |
| 32506       | CadSNP8101     | <i>Desi</i>      | Ca_Desig_Scaffold00568       | 37391                          | (G/T)       |
| 32507       | CadSNP8102     | <i>Desi</i>      | Ca_Desig_Scaffold00568       | 37399                          | (A/T)       |
| 32508       | CadSNP8103     | <i>Desi</i>      | Ca_Desig_Scaffold00568       | 39818                          | (C/A)       |
| 32509       | CadSNP8104     | <i>Desi</i>      | Ca_Desig_Scaffold00568       | 39820                          | (G/A)       |
| 32510       | CadSNP8105     | <i>Desi</i>      | Ca_Desig_Scaffold00568       | 39895                          | (C/T)       |
| 32511       | CadSNP8106     | <i>Desi</i>      | Ca_Desig_Scaffold00568       | 74856                          | (C/T)       |
| 32512       | CadSNP8107     | <i>Desi</i>      | Ca_Desig_Scaffold00568       | 75197                          | (G/A)       |
| 32513       | CadSNP8108     | <i>Desi</i>      | Ca_Desig_Scaffold00568       | 75372                          | (A/T)       |
| 32514       | CadSNP8109     | <i>Desi</i>      | Ca_Desig_Scaffold00568       | 125818                         | (T/G)       |
| 32515       | CadSNP8110     | <i>Desi</i>      | Ca_Desig_Scaffold00576       | 107492                         | (T/G)       |
| 32516       | CadSNP8111     | <i>Desi</i>      | Ca_Desig_Scaffold00576       | 107481                         | (G/T)       |
| 32517       | CadSNP8112     | <i>Desi</i>      | Ca_Desig_Scaffold00579       | 29889                          | (A/C)       |
| 32518       | CadSNP8113     | <i>Desi</i>      | Ca_Desig_Scaffold00579       | 29891                          | (G/A)       |
| 32519       | CadSNP8114     | <i>Desi</i>      | Ca_Desig_Scaffold00580       | 36985                          | (T/C)       |
| 32520       | CadSNP8115     | <i>Desi</i>      | Ca_Desig_Scaffold00580       | 36982                          | (T/C)       |
| 32521       | CadSNP8116     | <i>Desi</i>      | Ca_Desig_Scaffold00580       | 36979                          | (A/T)       |
| 32522       | CadSNP8117     | <i>Desi</i>      | Ca_Desig_Scaffold00580       | 36940                          | (A/T)       |
| 32523       | CadSNP8118     | <i>Desi</i>      | Ca_Desig_Scaffold00580       | 36928                          | (G/A)       |
| 32524       | CadSNP8119     | <i>Desi</i>      | Ca_Desig_Scaffold00580       | 36926                          | (T/C)       |
| 32525       | CadSNP8120     | <i>Desi</i>      | Ca_Desig_Scaffold00580       | 36913                          | (C/A)       |
| 32526       | CadSNP8121     | <i>Desi</i>      | Ca_Desig_Scaffold00580       | 36910                          | (A/T)       |
| 32527       | CadSNP8122     | <i>Desi</i>      | Ca_Desig_Scaffold00580       | 36904                          | (C/A)       |

| <b>S.N.</b> | <b>SNP IDs</b> | <b>Cultivars</b> | <b>Chromosomes/scaffolds</b> | <b>Physical positions (bp)</b> | <b>SNPs</b> |
|-------------|----------------|------------------|------------------------------|--------------------------------|-------------|
| 32528       | CadSNP8123     | <i>Desi</i>      | Ca_Desig_Scaffold00580       | 40447                          | (A/T)       |
| 32529       | CadSNP8124     | <i>Desi</i>      | Ca_Desig_Scaffold00580       | 40456                          | (C/T)       |
| 32530       | CadSNP8125     | <i>Desi</i>      | Ca_Desig_Scaffold00580       | 40468                          | (A/G)       |
| 32531       | CadSNP8126     | <i>Desi</i>      | Ca_Desig_Scaffold00580       | 40474                          | (C/T)       |
| 32532       | CadSNP8127     | <i>Desi</i>      | Ca_Desig_Scaffold00580       | 40483                          | (A/T)       |
| 32533       | CadSNP8128     | <i>Desi</i>      | Ca_Desig_Scaffold00580       | 40519                          | (T/G)       |
| 32534       | CadSNP8129     | <i>Desi</i>      | Ca_Desig_Scaffold00580       | 57089                          | (A/G)       |
| 32535       | CadSNP8130     | <i>Desi</i>      | Ca_Desig_Scaffold00580       | 68128                          | (C/T)       |
| 32536       | CadSNP8131     | <i>Desi</i>      | Ca_Desig_Scaffold00581       | 23360                          | (C/T)       |
| 32537       | CadSNP8132     | <i>Desi</i>      | Ca_Desig_Scaffold00581       | 35686                          | (A/G)       |
| 32538       | CadSNP8133     | <i>Desi</i>      | Ca_Desig_Scaffold00581       | 36301                          | (A/C)       |
| 32539       | CadSNP8134     | <i>Desi</i>      | Ca_Desig_Scaffold00581       | 36306                          | (G/C)       |
| 32540       | CadSNP8135     | <i>Desi</i>      | Ca_Desig_Scaffold00581       | 36337                          | (A/G)       |
| 32541       | CadSNP8136     | <i>Desi</i>      | Ca_Desig_Scaffold00582       | 8158                           | (T/C)       |
| 32542       | CadSNP8137     | <i>Desi</i>      | Ca_Desig_Scaffold00582       | 8101                           | (A/G)       |
| 32543       | CadSNP8138     | <i>Desi</i>      | Ca_Desig_Scaffold00583       | 7595                           | (G/A)       |
| 32544       | CadSNP8139     | <i>Desi</i>      | Ca_Desig_Scaffold00583       | 7628                           | (A/C)       |
| 32545       | CadSNP8140     | <i>Desi</i>      | Ca_Desig_Scaffold00583       | 7631                           | (A/T)       |
| 32546       | CadSNP8141     | <i>Desi</i>      | Ca_Desig_Scaffold00583       | 43288                          | (A/T)       |
| 32547       | CadSNP8142     | <i>Desi</i>      | Ca_Desig_Scaffold00583       | 68709                          | (A/C)       |
| 32548       | CadSNP8143     | <i>Desi</i>      | Ca_Desig_Scaffold00585       | 39549                          | (C/A)       |
| 32549       | CadSNP8144     | <i>Desi</i>      | Ca_Desig_Scaffold00592       | 16074                          | (A/T)       |
| 32550       | CadSNP8145     | <i>Desi</i>      | Ca_Desig_Scaffold00592       | 16091                          | (C/G)       |
| 32551       | CadSNP8146     | <i>Desi</i>      | Ca_Desig_Scaffold00592       | 17477                          | (G/C)       |
| 32552       | CadSNP8147     | <i>Desi</i>      | Ca_Desig_Scaffold00592       | 28156                          | (C/A)       |
| 32553       | CadSNP8148     | <i>Desi</i>      | Ca_Desig_Scaffold00592       | 34272                          | (C/T)       |
| 32554       | CadSNP8149     | <i>Desi</i>      | Ca_Desig_Scaffold00592       | 128281                         | (A/G)       |
| 32555       | CadSNP8150     | <i>Desi</i>      | Ca_Desig_Scaffold00598       | 30951                          | (T/G)       |
| 32556       | CadSNP8151     | <i>Desi</i>      | Ca_Desig_Scaffold00601       | 5841                           | (G/T)       |
| 32557       | CadSNP8152     | <i>Desi</i>      | Ca_Desig_Scaffold00601       | 5842                           | (T/C)       |
| 32558       | CadSNP8153     | <i>Desi</i>      | Ca_Desig_Scaffold00601       | 12115                          | (T/C)       |
| 32559       | CadSNP8154     | <i>Desi</i>      | Ca_Desig_Scaffold00601       | 33550                          | (T/A)       |
| 32560       | CadSNP8155     | <i>Desi</i>      | Ca_Desig_Scaffold00601       | 43345                          | (A/T)       |
| 32561       | CadSNP8156     | <i>Desi</i>      | Ca_Desig_Scaffold00601       | 100281                         | (G/A)       |
| 32562       | CadSNP8157     | <i>Desi</i>      | Ca_Desig_Scaffold00603       | 11189                          | (A/C)       |
| 32563       | CadSNP8158     | <i>Desi</i>      | Ca_Desig_Scaffold00603       | 11225                          | (G/T)       |
| 32564       | CadSNP8159     | <i>Desi</i>      | Ca_Desig_Scaffold00603       | 15608                          | (G/A)       |
| 32565       | CadSNP8160     | <i>Desi</i>      | Ca_Desig_Scaffold00603       | 15627                          | (C/A)       |

| <b>S.N.</b> | <b>SNP IDs</b> | <b>Cultivars</b> | <b>Chromosomes/scaffolds</b> | <b>Physical positions (bp)</b> | <b>SNPs</b> |
|-------------|----------------|------------------|------------------------------|--------------------------------|-------------|
| 32566       | CadSNP8161     | <i>Desi</i>      | Ca_Desig_Scaffold00603       | 22552                          | (C/A)       |
| 32567       | CadSNP8162     | <i>Desi</i>      | Ca_Desig_Scaffold00603       | 77537                          | (A/G)       |
| 32568       | CadSNP8163     | <i>Desi</i>      | Ca_Desig_Scaffold00603       | 78070                          | (C/T)       |
| 32569       | CadSNP8164     | <i>Desi</i>      | Ca_Desig_Scaffold00603       | 78066                          | (G/T)       |
| 32570       | CadSNP8165     | <i>Desi</i>      | Ca_Desig_Scaffold00603       | 112193                         | (G/T)       |
| 32571       | CadSNP8166     | <i>Desi</i>      | Ca_Desig_Scaffold00603       | 112265                         | (C/G)       |
| 32572       | CadSNP8167     | <i>Desi</i>      | Ca_Desig_Scaffold00604       | 46338                          | (G/A)       |
| 32573       | CadSNP8168     | <i>Desi</i>      | Ca_Desig_Scaffold00604       | 68880                          | (C/T)       |
| 32574       | CadSNP8169     | <i>Desi</i>      | Ca_Desig_Scaffold00604       | 68908                          | (G/A)       |
| 32575       | CadSNP8170     | <i>Desi</i>      | Ca_Desig_Scaffold00604       | 68936                          | (A/G)       |
| 32576       | CadSNP8171     | <i>Desi</i>      | Ca_Desig_Scaffold00604       | 82361                          | (A/C)       |
| 32577       | CadSNP8172     | <i>Desi</i>      | Ca_Desig_Scaffold00604       | 95938                          | (G/A)       |
| 32578       | CadSNP8173     | <i>Desi</i>      | Ca_Desig_Scaffold00604       | 96267                          | (T/C)       |
| 32579       | CadSNP8174     | <i>Desi</i>      | Ca_Desig_Scaffold00606       | 59252                          | (T/C)       |
| 32580       | CadSNP8175     | <i>Desi</i>      | Ca_Desig_Scaffold00606       | 99622                          | (T/G)       |
| 32581       | CadSNP8176     | <i>Desi</i>      | Ca_Desig_Scaffold00606       | 132197                         | (A/T)       |
| 32582       | CadSNP8177     | <i>Desi</i>      | Ca_Desig_Scaffold00607       | 52935                          | (A/C)       |
| 32583       | CadSNP8178     | <i>Desi</i>      | Ca_Desig_Scaffold00607       | 79230                          | (C/T)       |
| 32584       | CadSNP8179     | <i>Desi</i>      | Ca_Desig_Scaffold00607       | 79729                          | (C/A)       |
| 32585       | CadSNP8180     | <i>Desi</i>      | Ca_Desig_Scaffold00608       | 112893                         | (C/T)       |
| 32586       | CadSNP8181     | <i>Desi</i>      | Ca_Desig_Scaffold00608       | 116398                         | (A/G)       |
| 32587       | CadSNP8182     | <i>Desi</i>      | Ca_Desig_Scaffold00609       | 90321                          | (G/A)       |
| 32588       | CadSNP8183     | <i>Desi</i>      | Ca_Desig_Scaffold00609       | 98741                          | (G/A)       |
| 32589       | CadSNP8184     | <i>Desi</i>      | Ca_Desig_Scaffold00609       | 98739                          | (A/T)       |
| 32590       | CadSNP8185     | <i>Desi</i>      | Ca_Desig_Scaffold00609       | 98751                          | (T/G)       |
| 32591       | CadSNP8186     | <i>Desi</i>      | Ca_Desig_Scaffold00609       | 107480                         | (A/C)       |
| 32592       | CadSNP8187     | <i>Desi</i>      | Ca_Desig_Scaffold00609       | 107643                         | (A/T)       |
| 32593       | CadSNP8188     | <i>Desi</i>      | Ca_Desig_Scaffold00609       | 107682                         | (A/C)       |
| 32594       | CadSNP8189     | <i>Desi</i>      | Ca_Desig_Scaffold00609       | 108878                         | (T/C)       |
| 32595       | CadSNP8190     | <i>Desi</i>      | Ca_Desig_Scaffold00609       | 108869                         | (A/T)       |
| 32596       | CadSNP8191     | <i>Desi</i>      | Ca_Desig_Scaffold00609       | 108864                         | (G/A)       |
| 32597       | CadSNP8192     | <i>Desi</i>      | Ca_Desig_Scaffold00609       | 108863                         | (A/C)       |
| 32598       | CadSNP8193     | <i>Desi</i>      | Ca_Desig_Scaffold00609       | 108862                         | (T/C)       |
| 32599       | CadSNP8194     | <i>Desi</i>      | Ca_Desig_Scaffold00609       | 108859                         | (T/C)       |
| 32600       | CadSNP8195     | <i>Desi</i>      | Ca_Desig_Scaffold00609       | 108857                         | (A/G)       |
| 32601       | CadSNP8196     | <i>Desi</i>      | Ca_Desig_Scaffold00609       | 108847                         | (T/G)       |
| 32602       | CadSNP8197     | <i>Desi</i>      | Ca_Desig_Scaffold00609       | 108840                         | (G/A)       |
| 32603       | CadSNP8198     | <i>Desi</i>      | Ca_Desig_Scaffold00609       | 108817                         | (A/C)       |

| <b>S.N.</b> | <b>SNP IDs</b> | <b>Cultivars</b> | <b>Chromosomes/scaffolds</b> | <b>Physical positions (bp)</b> | <b>SNPs</b> |
|-------------|----------------|------------------|------------------------------|--------------------------------|-------------|
| 32604       | CadSNP8199     | <i>Desi</i>      | Ca_Desig_Scaffold00609       | 108815                         | (A/G)       |
| 32605       | CadSNP8200     | <i>Desi</i>      | Ca_Desig_Scaffold00609       | 108803                         | (A/G)       |
| 32606       | CadSNP8201     | <i>Desi</i>      | Ca_Desig_Scaffold00609       | 108926                         | (T/C)       |
| 32607       | CadSNP8202     | <i>Desi</i>      | Ca_Desig_Scaffold00609       | 109153                         | (T/C)       |
| 32608       | CadSNP8203     | <i>Desi</i>      | Ca_Desig_Scaffold00609       | 109207                         | (A/T)       |
| 32609       | CadSNP8204     | <i>Desi</i>      | Ca_Desig_Scaffold00609       | 111691                         | (C/G)       |
| 32610       | CadSNP8205     | <i>Desi</i>      | Ca_Desig_Scaffold00609       | 111657                         | (A/G)       |
| 32611       | CadSNP8206     | <i>Desi</i>      | Ca_Desig_Scaffold00609       | 116688                         | (G/T)       |
| 32612       | CadSNP8207     | <i>Desi</i>      | Ca_Desig_Scaffold00609       | 116761                         | (A/T)       |
| 32613       | CadSNP8208     | <i>Desi</i>      | Ca_Desig_Scaffold00609       | 116871                         | (T/C)       |
| 32614       | CadSNP8209     | <i>Desi</i>      | Ca_Desig_Scaffold00609       | 116867                         | (G/C)       |
| 32615       | CadSNP8210     | <i>Desi</i>      | Ca_Desig_Scaffold00609       | 120404                         | (C/T)       |
| 32616       | CadSNP8211     | <i>Desi</i>      | Ca_Desig_Scaffold00610       | 49717                          | (A/G)       |
| 32617       | CadSNP8212     | <i>Desi</i>      | Ca_Desig_Scaffold00610       | 93748                          | (T/G)       |
| 32618       | CadSNP8213     | <i>Desi</i>      | Ca_Desig_Scaffold00610       | 93696                          | (A/C)       |
| 32619       | CadSNP8214     | <i>Desi</i>      | Ca_Desig_Scaffold00610       | 93695                          | (T/A)       |
| 32620       | CadSNP8215     | <i>Desi</i>      | Ca_Desig_Scaffold00610       | 97352                          | (T/C)       |
| 32621       | CadSNP8216     | <i>Desi</i>      | Ca_Desig_Scaffold00610       | 99073                          | (A/T)       |
| 32622       | CadSNP8217     | <i>Desi</i>      | Ca_Desig_Scaffold00610       | 99190                          | (T/C)       |
| 32623       | CadSNP8218     | <i>Desi</i>      | Ca_Desig_Scaffold00610       | 99127                          | (T/C)       |
| 32624       | CadSNP8219     | <i>Desi</i>      | Ca_Desig_Scaffold00610       | 103933                         | (G/A)       |
| 32625       | CadSNP8220     | <i>Desi</i>      | Ca_Desig_Scaffold00610       | 103913                         | (G/A)       |
| 32626       | CadSNP8221     | <i>Desi</i>      | Ca_Desig_Scaffold00610       | 104000                         | (C/T)       |
| 32627       | CadSNP8222     | <i>Desi</i>      | Ca_Desig_Scaffold00610       | 103999                         | (A/G)       |
| 32628       | CadSNP8223     | <i>Desi</i>      | Ca_Desig_Scaffold00611       | 7834                           | (C/A)       |
| 32629       | CadSNP8224     | <i>Desi</i>      | Ca_Desig_Scaffold00611       | 72836                          | (A/G)       |
| 32630       | CadSNP8225     | <i>Desi</i>      | Ca_Desig_Scaffold00611       | 72777                          | (C/A)       |
| 32631       | CadSNP8226     | <i>Desi</i>      | Ca_Desig_Scaffold00611       | 72899                          | (G/T)       |
| 32632       | CadSNP8227     | <i>Desi</i>      | Ca_Desig_Scaffold00611       | 86236                          | (C/A)       |
| 32633       | CadSNP8228     | <i>Desi</i>      | Ca_Desig_Scaffold00611       | 98964                          | (T/A)       |
| 32634       | CadSNP8229     | <i>Desi</i>      | Ca_Desig_Scaffold00611       | 98974                          | (T/C)       |
| 32635       | CadSNP8230     | <i>Desi</i>      | Ca_Desig_Scaffold00611       | 98979                          | (A/G)       |
| 32636       | CadSNP8231     | <i>Desi</i>      | Ca_Desig_Scaffold00611       | 99131                          | (G/A)       |
| 32637       | CadSNP8232     | <i>Desi</i>      | Ca_Desig_Scaffold00611       | 99206                          | (T/G)       |
| 32638       | CadSNP8233     | <i>Desi</i>      | Ca_Desig_Scaffold00611       | 106741                         | (G/T)       |
| 32639       | CadSNP8234     | <i>Desi</i>      | Ca_Desig_Scaffold00611       | 106828                         | (T/C)       |
| 32640       | CadSNP8235     | <i>Desi</i>      | Ca_Desig_Scaffold00611       | 106960                         | (C/T)       |
| 32641       | CadSNP8236     | <i>Desi</i>      | Ca_Desig_Scaffold00613       | 52046                          | (T/C)       |

| <b>S.N.</b> | <b>SNP IDs</b> | <b>Cultivars</b> | <b>Chromosomes/scaffolds</b> | <b>Physical positions (bp)</b> | <b>SNPs</b> |
|-------------|----------------|------------------|------------------------------|--------------------------------|-------------|
| 32642       | CadSNP8237     | <i>Desi</i>      | Ca_Desig_Scaffold00613       | 52066                          | (A/G)       |
| 32643       | CadSNP8238     | <i>Desi</i>      | Ca_Desig_Scaffold00614       | 13949                          | (A/C)       |
| 32644       | CadSNP8239     | <i>Desi</i>      | Ca_Desig_Scaffold00614       | 45724                          | (A/T)       |
| 32645       | CadSNP8240     | <i>Desi</i>      | Ca_Desig_Scaffold00614       | 45808                          | (T/C)       |
| 32646       | CadSNP8241     | <i>Desi</i>      | Ca_Desig_Scaffold00614       | 45860                          | (T/A)       |
| 32647       | CadSNP8242     | <i>Desi</i>      | Ca_Desig_Scaffold00614       | 53785                          | (G/A)       |
| 32648       | CadSNP8243     | <i>Desi</i>      | Ca_Desig_Scaffold00614       | 53824                          | (G/A)       |
| 32649       | CadSNP8244     | <i>Desi</i>      | Ca_Desig_Scaffold00614       | 53825                          | (T/C)       |
| 32650       | CadSNP8245     | <i>Desi</i>      | Ca_Desig_Scaffold00614       | 85653                          | (C/G)       |
| 32651       | CadSNP8246     | <i>Desi</i>      | Ca_Desig_Scaffold00614       | 105277                         | (A/G)       |
| 32652       | CadSNP8247     | <i>Desi</i>      | Ca_Desig_Scaffold00614       | 117384                         | (C/T)       |
| 32653       | CadSNP8248     | <i>Desi</i>      | Ca_Desig_Scaffold00617       | 85526                          | (G/A)       |
| 32654       | CadSNP8249     | <i>Desi</i>      | Ca_Desig_Scaffold00617       | 113754                         | (C/T)       |
| 32655       | CadSNP8250     | <i>Desi</i>      | Ca_Desig_Scaffold00618       | 72110                          | (A/C)       |
| 32656       | CadSNP8251     | <i>Desi</i>      | Ca_Desig_Scaffold00618       | 72156                          | (A/C)       |
| 32657       | CadSNP8252     | <i>Desi</i>      | Ca_Desig_Scaffold00618       | 100769                         | (C/T)       |
| 32658       | CadSNP8253     | <i>Desi</i>      | Ca_Desig_Scaffold00618       | 113594                         | (T/G)       |
| 32659       | CadSNP8254     | <i>Desi</i>      | Ca_Desig_Scaffold00619       | 127387                         | (T/C)       |
| 32660       | CadSNP8255     | <i>Desi</i>      | Ca_Desig_Scaffold00619       | 127348                         | (C/A)       |
| 32661       | CadSNP8256     | <i>Desi</i>      | Ca_Desig_Scaffold00619       | 127346                         | (G/T)       |
| 32662       | CadSNP8257     | <i>Desi</i>      | Ca_Desig_Scaffold00620       | 8064                           | (T/C)       |
| 32663       | CadSNP8258     | <i>Desi</i>      | Ca_Desig_Scaffold00620       | 42282                          | (A/C)       |
| 32664       | CadSNP8259     | <i>Desi</i>      | Ca_Desig_Scaffold00620       | 42325                          | (C/A)       |
| 32665       | CadSNP8260     | <i>Desi</i>      | Ca_Desig_Scaffold00620       | 71737                          | (T/A)       |
| 32666       | CadSNP8261     | <i>Desi</i>      | Ca_Desig_Scaffold00620       | 71839                          | (G/C)       |
| 32667       | CadSNP8262     | <i>Desi</i>      | Ca_Desig_Scaffold00620       | 89562                          | (G/A)       |
| 32668       | CadSNP8263     | <i>Desi</i>      | Ca_Desig_Scaffold00624       | 69711                          | (A/G)       |
| 32669       | CadSNP8264     | <i>Desi</i>      | Ca_Desig_Scaffold00625       | 11233                          | (T/C)       |
| 32670       | CadSNP8265     | <i>Desi</i>      | Ca_Desig_Scaffold00625       | 11256                          | (A/C)       |
| 32671       | CadSNP8266     | <i>Desi</i>      | Ca_Desig_Scaffold00625       | 12430                          | (A/C)       |
| 32672       | CadSNP8267     | <i>Desi</i>      | Ca_Desig_Scaffold00625       | 12431                          | (G/T)       |
| 32673       | CadSNP8268     | <i>Desi</i>      | Ca_Desig_Scaffold00625       | 43104                          | (G/A)       |
| 32674       | CadSNP8269     | <i>Desi</i>      | Ca_Desig_Scaffold00625       | 43336                          | (T/G)       |
| 32675       | CadSNP8270     | <i>Desi</i>      | Ca_Desig_Scaffold00625       | 78837                          | (A/C)       |
| 32676       | CadSNP8271     | <i>Desi</i>      | Ca_Desig_Scaffold00626       | 47126                          | (C/T)       |
| 32677       | CadSNP8272     | <i>Desi</i>      | Ca_Desig_Scaffold00626       | 47238                          | (G/T)       |
| 32678       | CadSNP8273     | <i>Desi</i>      | Ca_Desig_Scaffold00626       | 75102                          | (T/C)       |
| 32679       | CadSNP8274     | <i>Desi</i>      | Ca_Desig_Scaffold00626       | 75270                          | (C/T)       |

| <b>S.N.</b> | <b>SNP IDs</b> | <b>Cultivars</b> | <b>Chromosomes/scaffolds</b> | <b>Physical positions (bp)</b> | <b>SNPs</b> |
|-------------|----------------|------------------|------------------------------|--------------------------------|-------------|
| 32680       | CadSNP8275     | <i>Desi</i>      | Ca_Desig_Scaffold00626       | 97784                          | (T/C)       |
| 32681       | CadSNP8276     | <i>Desi</i>      | Ca_Desig_Scaffold00626       | 125265                         | (G/A)       |
| 32682       | CadSNP8277     | <i>Desi</i>      | Ca_Desig_Scaffold00626       | 125264                         | (C/T)       |
| 32683       | CadSNP8278     | <i>Desi</i>      | Ca_Desig_Scaffold00626       | 125255                         | (G/A)       |
| 32684       | CadSNP8279     | <i>Desi</i>      | Ca_Desig_Scaffold00628       | 97948                          | (T/C)       |
| 32685       | CadSNP8280     | <i>Desi</i>      | Ca_Desig_Scaffold00630       | 39386                          | (C/G)       |
| 32686       | CadSNP8281     | <i>Desi</i>      | Ca_Desig_Scaffold00630       | 84327                          | (G/C)       |
| 32687       | CadSNP8282     | <i>Desi</i>      | Ca_Desig_Scaffold00631       | 128113                         | (C/T)       |
| 32688       | CadSNP8283     | <i>Desi</i>      | Ca_Desig_Scaffold00631       | 160303                         | (A/G)       |
| 32689       | CadSNP8284     | <i>Desi</i>      | Ca_Desig_Scaffold00631       | 189756                         | (A/G)       |
| 32690       | CadSNP8285     | <i>Desi</i>      | Ca_Desig_Scaffold00631       | 224350                         | (C/T)       |
| 32691       | CadSNP8286     | <i>Desi</i>      | Ca_Desig_Scaffold00634       | 248698                         | (C/G)       |
| 32692       | CadSNP8287     | <i>Desi</i>      | Ca_Desig_Scaffold00635       | 38383                          | (C/T)       |
| 32693       | CadSNP8288     | <i>Desi</i>      | Ca_Desig_Scaffold00635       | 38431                          | (A/T)       |
| 32694       | CadSNP8289     | <i>Desi</i>      | Ca_Desig_Scaffold00635       | 48097                          | (G/A)       |
| 32695       | CadSNP8290     | <i>Desi</i>      | Ca_Desig_Scaffold00635       | 48083                          | (G/C)       |
| 32696       | CadSNP8291     | <i>Desi</i>      | Ca_Desig_Scaffold00635       | 73996                          | (A/G)       |
| 32697       | CadSNP8292     | <i>Desi</i>      | Ca_Desig_Scaffold00635       | 79850                          | (C/T)       |
| 32698       | CadSNP8293     | <i>Desi</i>      | Ca_Desig_Scaffold00635       | 79952                          | (A/C)       |
| 32699       | CadSNP8294     | <i>Desi</i>      | Ca_Desig_Scaffold00635       | 79953                          | (G/T)       |
| 32700       | CadSNP8295     | <i>Desi</i>      | Ca_Desig_Scaffold00635       | 88832                          | (T/C)       |
| 32701       | CadSNP8296     | <i>Desi</i>      | Ca_Desig_Scaffold00635       | 88820                          | (C/T)       |
| 32702       | CadSNP8297     | <i>Desi</i>      | Ca_Desig_Scaffold00635       | 88794                          | (A/G)       |
| 32703       | CadSNP8298     | <i>Desi</i>      | Ca_Desig_Scaffold00637       | 117736                         | (A/C)       |
| 32704       | CadSNP8299     | <i>Desi</i>      | Ca_Desig_Scaffold00637       | 123525                         | (T/G)       |
| 32705       | CadSNP8300     | <i>Desi</i>      | Ca_Desig_Scaffold00638       | 27584                          | (T/C)       |
| 32706       | CadSNP8301     | <i>Desi</i>      | Ca_Desig_Scaffold00640       | 12335                          | (A/T)       |
| 32707       | CadSNP8302     | <i>Desi</i>      | Ca_Desig_Scaffold00640       | 12344                          | (G/A)       |
| 32708       | CadSNP8303     | <i>Desi</i>      | Ca_Desig_Scaffold00640       | 12386                          | (T/C)       |
| 32709       | CadSNP8304     | <i>Desi</i>      | Ca_Desig_Scaffold00640       | 12443                          | (C/T)       |
| 32710       | CadSNP8305     | <i>Desi</i>      | Ca_Desig_Scaffold00640       | 12677                          | (A/C)       |
| 32711       | CadSNP8306     | <i>Desi</i>      | Ca_Desig_Scaffold00640       | 58175                          | (A/G)       |
| 32712       | CadSNP8307     | <i>Desi</i>      | Ca_Desig_Scaffold00640       | 58343                          | (C/T)       |
| 32713       | CadSNP8308     | <i>Desi</i>      | Ca_Desig_Scaffold00640       | 58651                          | (A/T)       |
| 32714       | CadSNP8309     | <i>Desi</i>      | Ca_Desig_Scaffold00640       | 67997                          | (A/G)       |
| 32715       | CadSNP8310     | <i>Desi</i>      | Ca_Desig_Scaffold00640       | 68074                          | (A/C)       |
| 32716       | CadSNP8311     | <i>Desi</i>      | Ca_Desig_Scaffold00640       | 101890                         | (T/C)       |
| 32717       | CadSNP8312     | <i>Desi</i>      | Ca_Desig_Scaffold00640       | 102417                         | (C/T)       |

| <b>S.N.</b> | <b>SNP IDs</b> | <b>Cultivars</b> | <b>Chromosomes/scaffolds</b> | <b>Physical positions (bp)</b> | <b>SNPs</b> |
|-------------|----------------|------------------|------------------------------|--------------------------------|-------------|
| 32718       | CadSNP8313     | <i>Desi</i>      | Ca_Desig_Scaffold00640       | 102511                         | (G/A)       |
| 32719       | CadSNP8314     | <i>Desi</i>      | Ca_Desig_Scaffold00640       | 117896                         | (A/G)       |
| 32720       | CadSNP8315     | <i>Desi</i>      | Ca_Desig_Scaffold00640       | 120278                         | (T/C)       |
| 32721       | CadSNP8316     | <i>Desi</i>      | Ca_Desig_Scaffold00640       | 120281                         | (G/A)       |
| 32722       | CadSNP8317     | <i>Desi</i>      | Ca_Desig_Scaffold00640       | 120311                         | (A/T)       |
| 32723       | CadSNP8318     | <i>Desi</i>      | Ca_Desig_Scaffold00640       | 120320                         | (T/C)       |
| 32724       | CadSNP8319     | <i>Desi</i>      | Ca_Desig_Scaffold00640       | 121168                         | (G/A)       |
| 32725       | CadSNP8320     | <i>Desi</i>      | Ca_Desig_Scaffold00640       | 121162                         | (T/C)       |
| 32726       | CadSNP8321     | <i>Desi</i>      | Ca_Desig_Scaffold00640       | 121324                         | (A/T)       |
| 32727       | CadSNP8322     | <i>Desi</i>      | Ca_Desig_Scaffold00642       | 15730                          | (G/A)       |
| 32728       | CadSNP8323     | <i>Desi</i>      | Ca_Desig_Scaffold00642       | 15915                          | (G/T)       |
| 32729       | CadSNP8324     | <i>Desi</i>      | Ca_Desig_Scaffold00642       | 21227                          | (A/C)       |
| 32730       | CadSNP8325     | <i>Desi</i>      | Ca_Desig_Scaffold00642       | 21228                          | (G/C)       |
| 32731       | CadSNP8326     | <i>Desi</i>      | Ca_Desig_Scaffold00642       | 21232                          | (G/C)       |
| 32732       | CadSNP8327     | <i>Desi</i>      | Ca_Desig_Scaffold00642       | 38010                          | (T/A)       |
| 32733       | CadSNP8328     | <i>Desi</i>      | Ca_Desig_Scaffold00642       | 38037                          | (C/T)       |
| 32734       | CadSNP8329     | <i>Desi</i>      | Ca_Desig_Scaffold00642       | 51028                          | (C/T)       |
| 32735       | CadSNP8330     | <i>Desi</i>      | Ca_Desig_Scaffold00642       | 51092                          | (T/G)       |
| 32736       | CadSNP8331     | <i>Desi</i>      | Ca_Desig_Scaffold00642       | 52030                          | (C/G)       |
| 32737       | CadSNP8332     | <i>Desi</i>      | Ca_Desig_Scaffold00642       | 52083                          | (G/T)       |
| 32738       | CadSNP8333     | <i>Desi</i>      | Ca_Desig_Scaffold00642       | 52086                          | (A/G)       |
| 32739       | CadSNP8334     | <i>Desi</i>      | Ca_Desig_Scaffold00642       | 52097                          | (T/G)       |
| 32740       | CadSNP8335     | <i>Desi</i>      | Ca_Desig_Scaffold00643       | 119989                         | (C/T)       |
| 32741       | CadSNP8336     | <i>Desi</i>      | Ca_Desig_Scaffold00644       | 61075                          | (T/G)       |
| 32742       | CadSNP8337     | <i>Desi</i>      | Ca_Desig_Scaffold00644       | 61179                          | (C/A)       |
| 32743       | CadSNP8338     | <i>Desi</i>      | Ca_Desig_Scaffold00644       | 76753                          | (C/T)       |
| 32744       | CadSNP8339     | <i>Desi</i>      | Ca_Desig_Scaffold00644       | 94661                          | (C/A)       |
| 32745       | CadSNP8340     | <i>Desi</i>      | Ca_Desig_Scaffold00644       | 94688                          | (C/G)       |
| 32746       | CadSNP8341     | <i>Desi</i>      | Ca_Desig_Scaffold00644       | 115417                         | (T/G)       |
| 32747       | CadSNP8342     | <i>Desi</i>      | Ca_Desig_Scaffold00644       | 115442                         | (T/C)       |
| 32748       | CadSNP8343     | <i>Desi</i>      | Ca_Desig_Scaffold00645       | 43773                          | (A/G)       |
| 32749       | CadSNP8344     | <i>Desi</i>      | Ca_Desig_Scaffold00645       | 48752                          | (C/G)       |
| 32750       | CadSNP8345     | <i>Desi</i>      | Ca_Desig_Scaffold00645       | 48822                          | (A/G)       |
| 32751       | CadSNP8346     | <i>Desi</i>      | Ca_Desig_Scaffold00645       | 108809                         | (G/A)       |
| 32752       | CadSNP8347     | <i>Desi</i>      | Ca_Desig_Scaffold00646       | 48447                          | (T/C)       |
| 32753       | CadSNP8348     | <i>Desi</i>      | Ca_Desig_Scaffold00646       | 65000                          | (A/C)       |
| 32754       | CadSNP8349     | <i>Desi</i>      | Ca_Desig_Scaffold00646       | 65313                          | (G/A)       |
| 32755       | CadSNP8350     | <i>Desi</i>      | Ca_Desig_Scaffold00646       | 67522                          | (G/A)       |



| <b>S.N.</b> | <b>SNP IDs</b> | <b>Cultivars</b> | <b>Chromosomes/scaffolds</b> | <b>Physical positions (bp)</b> | <b>SNPs</b> |
|-------------|----------------|------------------|------------------------------|--------------------------------|-------------|
| 32756       | CadSNP8351     | <i>Desi</i>      | Ca_Desig_Scaffold00646       | 67535                          | (A/C)       |
| 32757       | CadSNP8352     | <i>Desi</i>      | Ca_Desig_Scaffold00646       | 89646                          | (G/A)       |
| 32758       | CadSNP8353     | <i>Desi</i>      | Ca_Desig_Scaffold00646       | 89901                          | (G/C)       |
| 32759       | CadSNP8354     | <i>Desi</i>      | Ca_Desig_Scaffold00646       | 89976                          | (A/G)       |
| 32760       | CadSNP8355     | <i>Desi</i>      | Ca_Desig_Scaffold00646       | 89951                          | (C/A)       |
| 32761       | CadSNP8356     | <i>Desi</i>      | Ca_Desig_Scaffold00647       | 6170                           | (T/G)       |
| 32762       | CadSNP8357     | <i>Desi</i>      | Ca_Desig_Scaffold00647       | 7450                           | (C/G)       |
| 32763       | CadSNP8358     | <i>Desi</i>      | Ca_Desig_Scaffold00647       | 7556                           | (C/A)       |
| 32764       | CadSNP8359     | <i>Desi</i>      | Ca_Desig_Scaffold00647       | 141065                         | (A/G)       |
| 32765       | CadSNP8360     | <i>Desi</i>      | Ca_Desig_Scaffold00647       | 203262                         | (G/A)       |
| 32766       | CadSNP8361     | <i>Desi</i>      | Ca_Desig_Scaffold00647       | 204354                         | (T/C)       |
| 32767       | CadSNP8362     | <i>Desi</i>      | Ca_Desig_Scaffold00649       | 60765                          | (C/T)       |
| 32768       | CadSNP8363     | <i>Desi</i>      | Ca_Desig_Scaffold00649       | 79710                          | (A/T)       |
| 32769       | CadSNP8364     | <i>Desi</i>      | Ca_Desig_Scaffold00651       | 22364                          | (A/C)       |
| 32770       | CadSNP8365     | <i>Desi</i>      | Ca_Desig_Scaffold00651       | 81313                          | (T/G)       |
| 32771       | CadSNP8366     | <i>Desi</i>      | Ca_Desig_Scaffold00651       | 81352                          | (C/T)       |
| 32772       | CadSNP8367     | <i>Desi</i>      | Ca_Desig_Scaffold00651       | 104130                         | (A/G)       |
| 32773       | CadSNP8368     | <i>Desi</i>      | Ca_Desig_Scaffold00651       | 109276                         | (T/C)       |
| 32774       | CadSNP8369     | <i>Desi</i>      | Ca_Desig_Scaffold00651       | 109274                         | (C/G)       |
| 32775       | CadSNP8370     | <i>Desi</i>      | Ca_Desig_Scaffold00651       | 109273                         | (G/C)       |
| 32776       | CadSNP8371     | <i>Desi</i>      | Ca_Desig_Scaffold00651       | 110940                         | (C/T)       |
| 32777       | CadSNP8372     | <i>Desi</i>      | Ca_Desig_Scaffold00651       | 110967                         | (G/A)       |
| 32778       | CadSNP8373     | <i>Desi</i>      | Ca_Desig_Scaffold00651       | 110970                         | (G/T)       |
| 32779       | CadSNP8374     | <i>Desi</i>      | Ca_Desig_Scaffold00651       | 110996                         | (C/T)       |
| 32780       | CadSNP8375     | <i>Desi</i>      | Ca_Desig_Scaffold00651       | 110997                         | (G/A)       |
| 32781       | CadSNP8376     | <i>Desi</i>      | Ca_Desig_Scaffold00654       | 32331                          | (A/C)       |
| 32782       | CadSNP8377     | <i>Desi</i>      | Ca_Desig_Scaffold00654       | 81113                          | (T/C)       |
| 32783       | CadSNP8378     | <i>Desi</i>      | Ca_Desig_Scaffold00654       | 84671                          | (C/T)       |
| 32784       | CadSNP8379     | <i>Desi</i>      | Ca_Desig_Scaffold00654       | 185601                         | (C/T)       |
| 32785       | CadSNP8380     | <i>Desi</i>      | Ca_Desig_Scaffold00657       | 26187                          | (A/T)       |
| 32786       | CadSNP8381     | <i>Desi</i>      | Ca_Desig_Scaffold00657       | 26258                          | (G/A)       |
| 32787       | CadSNP8382     | <i>Desi</i>      | Ca_Desig_Scaffold00658       | 43706                          | (G/T)       |
| 32788       | CadSNP8383     | <i>Desi</i>      | Ca_Desig_Scaffold00658       | 43921                          | (C/T)       |
| 32789       | CadSNP8384     | <i>Desi</i>      | Ca_Desig_Scaffold00658       | 78624                          | (C/A)       |
| 32790       | CadSNP8385     | <i>Desi</i>      | Ca_Desig_Scaffold00658       | 78625                          | (T/G)       |
| 32791       | CadSNP8386     | <i>Desi</i>      | Ca_Desig_Scaffold00659       | 91793                          | (C/T)       |
| 32792       | CadSNP8387     | <i>Desi</i>      | Ca_Desig_Scaffold00660       | 62124                          | (A/C)       |
| 32793       | CadSNP8388     | <i>Desi</i>      | Ca_Desig_Scaffold00660       | 92102                          | (T/G)       |

| <b>S.N.</b> | <b>SNP IDs</b> | <b>Cultivars</b> | <b>Chromosomes/scaffolds</b> | <b>Physical positions (bp)</b> | <b>SNPs</b> |
|-------------|----------------|------------------|------------------------------|--------------------------------|-------------|
| 32794       | CadSNP8389     | <i>Desi</i>      | Ca_Desig_Scaffold00660       | 124038                         | (G/A)       |
| 32795       | CadSNP8390     | <i>Desi</i>      | Ca_Desig_Scaffold00664       | 4615                           | (C/T)       |
| 32796       | CadSNP8391     | <i>Desi</i>      | Ca_Desig_Scaffold00664       | 4616                           | (C/G)       |
| 32797       | CadSNP8392     | <i>Desi</i>      | Ca_Desig_Scaffold00664       | 4670                           | (T/A)       |
| 32798       | CadSNP8393     | <i>Desi</i>      | Ca_Desig_Scaffold00666       | 114490                         | (T/C)       |
| 32799       | CadSNP8394     | <i>Desi</i>      | Ca_Desig_Scaffold00667       | 60868                          | (G/T)       |
| 32800       | CadSNP8395     | <i>Desi</i>      | Ca_Desig_Scaffold00667       | 60904                          | (A/T)       |
| 32801       | CadSNP8396     | <i>Desi</i>      | Ca_Desig_Scaffold00667       | 90133                          | (A/C)       |
| 32802       | CadSNP8397     | <i>Desi</i>      | Ca_Desig_Scaffold00668       | 119220                         | (T/C)       |
| 32803       | CadSNP8398     | <i>Desi</i>      | Ca_Desig_Scaffold00671       | 60374                          | (T/G)       |
| 32804       | CadSNP8399     | <i>Desi</i>      | Ca_Desig_Scaffold00671       | 125578                         | (A/G)       |
| 32805       | CadSNP8400     | <i>Desi</i>      | Ca_Desig_Scaffold00675       | 25498                          | (T/G)       |
| 32806       | CadSNP8401     | <i>Desi</i>      | Ca_Desig_Scaffold00675       | 27041                          | (G/C)       |
| 32807       | CadSNP8402     | <i>Desi</i>      | Ca_Desig_Scaffold00675       | 27045                          | (G/T)       |
| 32808       | CadSNP8403     | <i>Desi</i>      | Ca_Desig_Scaffold00675       | 27260                          | (T/C)       |
| 32809       | CadSNP8404     | <i>Desi</i>      | Ca_Desig_Scaffold00676       | 41652                          | (T/C)       |
| 32810       | CadSNP8405     | <i>Desi</i>      | Ca_Desig_Scaffold00679       | 31654                          | (T/A)       |
| 32811       | CadSNP8406     | <i>Desi</i>      | Ca_Desig_Scaffold00679       | 31613                          | (G/A)       |
| 32812       | CadSNP8407     | <i>Desi</i>      | Ca_Desig_Scaffold00679       | 31675                          | (A/G)       |
| 32813       | CadSNP8408     | <i>Desi</i>      | Ca_Desig_Scaffold00680       | 11576                          | (A/G)       |
| 32814       | CadSNP8409     | <i>Desi</i>      | Ca_Desig_Scaffold00680       | 11575                          | (A/T)       |
| 32815       | CadSNP8410     | <i>Desi</i>      | Ca_Desig_Scaffold00680       | 16012                          | (C/T)       |
| 32816       | CadSNP8411     | <i>Desi</i>      | Ca_Desig_Scaffold00680       | 34998                          | (C/T)       |
| 32817       | CadSNP8412     | <i>Desi</i>      | Ca_Desig_Scaffold00680       | 40177                          | (A/T)       |
| 32818       | CadSNP8413     | <i>Desi</i>      | Ca_Desig_Scaffold00680       | 40171                          | (C/T)       |
| 32819       | CadSNP8414     | <i>Desi</i>      | Ca_Desig_Scaffold00680       | 40168                          | (T/C)       |
| 32820       | CadSNP8415     | <i>Desi</i>      | Ca_Desig_Scaffold00680       | 40147                          | (G/A)       |
| 32821       | CadSNP8416     | <i>Desi</i>      | Ca_Desig_Scaffold00680       | 47853                          | (A/G)       |
| 32822       | CadSNP8417     | <i>Desi</i>      | Ca_Desig_Scaffold00680       | 47970                          | (G/A)       |
| 32823       | CadSNP8418     | <i>Desi</i>      | Ca_Desig_Scaffold00680       | 76297                          | (G/A)       |
| 32824       | CadSNP8419     | <i>Desi</i>      | Ca_Desig_Scaffold00680       | 76290                          | (G/A)       |
| 32825       | CadSNP8420     | <i>Desi</i>      | Ca_Desig_Scaffold00680       | 84507                          | (A/G)       |
| 32826       | CadSNP8421     | <i>Desi</i>      | Ca_Desig_Scaffold00681       | 127469                         | (G/A)       |
| 32827       | CadSNP8422     | <i>Desi</i>      | Ca_Desig_Scaffold00681       | 127475                         | (A/G)       |
| 32828       | CadSNP8423     | <i>Desi</i>      | Ca_Desig_Scaffold00681       | 127477                         | (A/T)       |
| 32829       | CadSNP8424     | <i>Desi</i>      | Ca_Desig_Scaffold00681       | 127498                         | (C/A)       |
| 32830       | CadSNP8425     | <i>Desi</i>      | Ca_Desig_Scaffold00681       | 127510                         | (T/A)       |
| 32831       | CadSNP8426     | <i>Desi</i>      | Ca_Desig_Scaffold00681       | 127529                         | (C/T)       |

| <b>S.N.</b> | <b>SNP IDs</b> | <b>Cultivars</b> | <b>Chromosomes/scaffolds</b> | <b>Physical positions (bp)</b> | <b>SNPs</b> |
|-------------|----------------|------------------|------------------------------|--------------------------------|-------------|
| 32832       | CadSNP8427     | <i>Desi</i>      | Ca_Desig_Scaffold00690       | 75772                          | (A/G)       |
| 32833       | CadSNP8428     | <i>Desi</i>      | Ca_Desig_Scaffold00691       | 73113                          | (A/G)       |
| 32834       | CadSNP8429     | <i>Desi</i>      | Ca_Desig_Scaffold00691       | 101458                         | (C/G)       |
| 32835       | CadSNP8430     | <i>Desi</i>      | Ca_Desig_Scaffold00691       | 101459                         | (A/G)       |
| 32836       | CadSNP8431     | <i>Desi</i>      | Ca_Desig_Scaffold00691       | 119430                         | (G/T)       |
| 32837       | CadSNP8432     | <i>Desi</i>      | Ca_Desig_Scaffold00691       | 120250                         | (C/A)       |
| 32838       | CadSNP8433     | <i>Desi</i>      | Ca_Desig_Scaffold00692       | 12665                          | (A/C)       |
| 32839       | CadSNP8434     | <i>Desi</i>      | Ca_Desig_Scaffold00694       | 40843                          | (A/G)       |
| 32840       | CadSNP8435     | <i>Desi</i>      | Ca_Desig_Scaffold00696       | 104936                         | (A/G)       |
| 32841       | CadSNP8436     | <i>Desi</i>      | Ca_Desig_Scaffold00696       | 114930                         | (C/T)       |
| 32842       | CadSNP8437     | <i>Desi</i>      | Ca_Desig_Scaffold00696       | 114918                         | (T/C)       |
| 32843       | CadSNP8438     | <i>Desi</i>      | Ca_Desig_Scaffold00696       | 117739                         | (A/T)       |
| 32844       | CadSNP8439     | <i>Desi</i>      | Ca_Desig_Scaffold00696       | 117725                         | (A/C)       |
| 32845       | CadSNP8440     | <i>Desi</i>      | Ca_Desig_Scaffold00696       | 123800                         | (C/A)       |
| 32846       | CadSNP8441     | <i>Desi</i>      | Ca_Desig_Scaffold00698       | 11973                          | (A/C)       |
| 32847       | CadSNP8442     | <i>Desi</i>      | Ca_Desig_Scaffold00698       | 11945                          | (C/T)       |
| 32848       | CadSNP8443     | <i>Desi</i>      | Ca_Desig_Scaffold00698       | 34633                          | (G/A)       |
| 32849       | CadSNP8444     | <i>Desi</i>      | Ca_Desig_Scaffold00698       | 34671                          | (G/T)       |
| 32850       | CadSNP8445     | <i>Desi</i>      | Ca_Desig_Scaffold00698       | 34754                          | (A/G)       |
| 32851       | CadSNP8446     | <i>Desi</i>      | Ca_Desig_Scaffold00698       | 34829                          | (G/T)       |
| 32852       | CadSNP8447     | <i>Desi</i>      | Ca_Desig_Scaffold00698       | 34897                          | (G/C)       |
| 32853       | CadSNP8448     | <i>Desi</i>      | Ca_Desig_Scaffold00698       | 40116                          | (T/C)       |
| 32854       | CadSNP8449     | <i>Desi</i>      | Ca_Desig_Scaffold00698       | 57773                          | (C/T)       |
| 32855       | CadSNP8450     | <i>Desi</i>      | Ca_Desig_Scaffold00698       | 70947                          | (A/G)       |
| 32856       | CadSNP8451     | <i>Desi</i>      | Ca_Desig_Scaffold00698       | 95511                          | (C/T)       |
| 32857       | CadSNP8452     | <i>Desi</i>      | Ca_Desig_Scaffold00698       | 107693                         | (T/C)       |
| 32858       | CadSNP8453     | <i>Desi</i>      | Ca_Desig_Scaffold00698       | 108475                         | (T/C)       |
| 32859       | CadSNP8454     | <i>Desi</i>      | Ca_Desig_Scaffold00698       | 108867                         | (G/A)       |
| 32860       | CadSNP8455     | <i>Desi</i>      | Ca_Desig_Scaffold00698       | 110191                         | (T/A)       |
| 32861       | CadSNP8456     | <i>Desi</i>      | Ca_Desig_Scaffold00698       | 110199                         | (C/A)       |
| 32862       | CadSNP8457     | <i>Desi</i>      | Ca_Desig_Scaffold00698       | 110249                         | (A/T)       |
| 32863       | CadSNP8458     | <i>Desi</i>      | Ca_Desig_Scaffold00698       | 119043                         | (G/A)       |
| 32864       | CadSNP8459     | <i>Desi</i>      | Ca_Desig_Scaffold00703       | 53460                          | (C/T)       |
| 32865       | CadSNP8460     | <i>Desi</i>      | Ca_Desig_Scaffold00703       | 53458                          | (C/G)       |
| 32866       | CadSNP8461     | <i>Desi</i>      | Ca_Desig_Scaffold00703       | 53459                          | (C/T)       |
| 32867       | CadSNP8462     | <i>Desi</i>      | Ca_Desig_Scaffold00703       | 53463                          | (C/T)       |
| 32868       | CadSNP8463     | <i>Desi</i>      | Ca_Desig_Scaffold00703       | 53472                          | (A/G)       |
| 32869       | CadSNP8464     | <i>Desi</i>      | Ca_Desig_Scaffold00703       | 53478                          | (A/T)       |

| <b>S.N.</b> | <b>SNP IDs</b> | <b>Cultivars</b> | <b>Chromosomes/scaffolds</b> | <b>Physical positions (bp)</b> | <b>SNPs</b> |
|-------------|----------------|------------------|------------------------------|--------------------------------|-------------|
| 32870       | CadSNP8465     | <i>Desi</i>      | Ca_Desig_Scaffold00703       | 53479                          | (A/G)       |
| 32871       | CadSNP8466     | <i>Desi</i>      | Ca_Desig_Scaffold00703       | 54288                          | (C/T)       |
| 32872       | CadSNP8467     | <i>Desi</i>      | Ca_Desig_Scaffold00703       | 54319                          | (T/C)       |
| 32873       | CadSNP8468     | <i>Desi</i>      | Ca_Desig_Scaffold00703       | 54332                          | (G/T)       |
| 32874       | CadSNP8469     | <i>Desi</i>      | Ca_Desig_Scaffold00703       | 96529                          | (A/G)       |
| 32875       | CadSNP8470     | <i>Desi</i>      | Ca_Desig_Scaffold00703       | 96547                          | (A/C)       |
| 32876       | CadSNP8471     | <i>Desi</i>      | Ca_Desig_Scaffold00710       | 56111                          | (G/A)       |
| 32877       | CadSNP8472     | <i>Desi</i>      | Ca_Desig_Scaffold00710       | 56119                          | (G/A)       |
| 32878       | CadSNP8473     | <i>Desi</i>      | Ca_Desig_Scaffold00710       | 56124                          | (T/G)       |
| 32879       | CadSNP8474     | <i>Desi</i>      | Ca_Desig_Scaffold00710       | 56175                          | (A/C)       |
| 32880       | CadSNP8475     | <i>Desi</i>      | Ca_Desig_Scaffold00710       | 59398                          | (A/C)       |
| 32881       | CadSNP8476     | <i>Desi</i>      | Ca_Desig_Scaffold00710       | 75560                          | (C/T)       |
| 32882       | CadSNP8477     | <i>Desi</i>      | Ca_Desig_Scaffold00710       | 119302                         | (G/T)       |
| 32883       | CadSNP8478     | <i>Desi</i>      | Ca_Desig_Scaffold00715       | 5579                           | (C/G)       |
| 32884       | CadSNP8479     | <i>Desi</i>      | Ca_Desig_Scaffold00717       | 10425                          | (C/T)       |
| 32885       | CadSNP8480     | <i>Desi</i>      | Ca_Desig_Scaffold00717       | 19389                          | (C/T)       |
| 32886       | CadSNP8481     | <i>Desi</i>      | Ca_Desig_Scaffold00718       | 42131                          | (T/C)       |
| 32887       | CadSNP8482     | <i>Desi</i>      | Ca_Desig_Scaffold00718       | 42601                          | (C/T)       |
| 32888       | CadSNP8483     | <i>Desi</i>      | Ca_Desig_Scaffold00718       | 47727                          | (G/T)       |
| 32889       | CadSNP8484     | <i>Desi</i>      | Ca_Desig_Scaffold00718       | 48854                          | (A/G)       |
| 32890       | CadSNP8485     | <i>Desi</i>      | Ca_Desig_Scaffold00718       | 48862                          | (T/G)       |
| 32891       | CadSNP8486     | <i>Desi</i>      | Ca_Desig_Scaffold00718       | 60819                          | (C/T)       |
| 32892       | CadSNP8487     | <i>Desi</i>      | Ca_Desig_Scaffold00718       | 99491                          | (T/A)       |
| 32893       | CadSNP8488     | <i>Desi</i>      | Ca_Desig_Scaffold00719       | 108923                         | (T/G)       |
| 32894       | CadSNP8489     | <i>Desi</i>      | Ca_Desig_Scaffold00723       | 27635                          | (T/A)       |
| 32895       | CadSNP8490     | <i>Desi</i>      | Ca_Desig_Scaffold00723       | 43134                          | (T/C)       |
| 32896       | CadSNP8491     | <i>Desi</i>      | Ca_Desig_Scaffold00723       | 43177                          | (C/T)       |
| 32897       | CadSNP8492     | <i>Desi</i>      | Ca_Desig_Scaffold00725       | 12948                          | (A/G)       |
| 32898       | CadSNP8493     | <i>Desi</i>      | Ca_Desig_Scaffold00725       | 13005                          | (G/A)       |
| 32899       | CadSNP8494     | <i>Desi</i>      | Ca_Desig_Scaffold00725       | 13222                          | (G/A)       |
| 32900       | CadSNP8495     | <i>Desi</i>      | Ca_Desig_Scaffold00725       | 29897                          | (C/T)       |
| 32901       | CadSNP8496     | <i>Desi</i>      | Ca_Desig_Scaffold00725       | 29886                          | (G/A)       |
| 32902       | CadSNP8497     | <i>Desi</i>      | Ca_Desig_Scaffold00725       | 29857                          | (T/C)       |
| 32903       | CadSNP8498     | <i>Desi</i>      | Ca_Desig_Scaffold00725       | 102954                         | (C/T)       |
| 32904       | CadSNP8499     | <i>Desi</i>      | Ca_Desig_Scaffold00725       | 103119                         | (G/C)       |
| 32905       | CadSNP8500     | <i>Desi</i>      | Ca_Desig_Scaffold00725       | 105354                         | (T/G)       |
| 32906       | CadSNP8501     | <i>Desi</i>      | Ca_Desig_Scaffold00725       | 105440                         | (A/G)       |
| 32907       | CadSNP8502     | <i>Desi</i>      | Ca_Desig_Scaffold00725       | 105410                         | (A/C)       |

| <b>S.N.</b> | <b>SNP IDs</b> | <b>Cultivars</b> | <b>Chromosomes/scaffolds</b> | <b>Physical positions (bp)</b> | <b>SNPs</b> |
|-------------|----------------|------------------|------------------------------|--------------------------------|-------------|
| 32908       | CadSNP8503     | <i>Desi</i>      | Ca_Desig_Scaffold00725       | 106560                         | (G/A)       |
| 32909       | CadSNP8504     | <i>Desi</i>      | Ca_Desig_Scaffold00725       | 106665                         | (T/A)       |
| 32910       | CadSNP8505     | <i>Desi</i>      | Ca_Desig_Scaffold00725       | 110304                         | (T/C)       |
| 32911       | CadSNP8506     | <i>Desi</i>      | Ca_Desig_Scaffold00725       | 110465                         | (C/A)       |
| 32912       | CadSNP8507     | <i>Desi</i>      | Ca_Desig_Scaffold00726       | 81477                          | (G/A)       |
| 32913       | CadSNP8508     | <i>Desi</i>      | Ca_Desig_Scaffold00726       | 81602                          | (C/T)       |
| 32914       | CadSNP8509     | <i>Desi</i>      | Ca_Desig_Scaffold00726       | 81653                          | (G/C)       |
| 32915       | CadSNP8510     | <i>Desi</i>      | Ca_Desig_Scaffold00726       | 81654                          | (T/G)       |
| 32916       | CadSNP8511     | <i>Desi</i>      | Ca_Desig_Scaffold00726       | 83518                          | (G/C)       |
| 32917       | CadSNP8512     | <i>Desi</i>      | Ca_Desig_Scaffold00726       | 83949                          | (G/A)       |
| 32918       | CadSNP8513     | <i>Desi</i>      | Ca_Desig_Scaffold00726       | 84107                          | (C/A)       |
| 32919       | CadSNP8514     | <i>Desi</i>      | Ca_Desig_Scaffold00726       | 84085                          | (G/A)       |
| 32920       | CadSNP8515     | <i>Desi</i>      | Ca_Desig_Scaffold00727       | 2285                           | (T/A)       |
| 32921       | CadSNP8516     | <i>Desi</i>      | Ca_Desig_Scaffold00727       | 112366                         | (G/C)       |
| 32922       | CadSNP8517     | <i>Desi</i>      | Ca_Desig_Scaffold00727       | 112436                         | (G/A)       |
| 32923       | CadSNP8518     | <i>Desi</i>      | Ca_Desig_Scaffold00727       | 122637                         | (C/T)       |
| 32924       | CadSNP8519     | <i>Desi</i>      | Ca_Desig_Scaffold00728       | 15128                          | (C/A)       |
| 32925       | CadSNP8520     | <i>Desi</i>      | Ca_Desig_Scaffold00728       | 15500                          | (G/A)       |
| 32926       | CadSNP8521     | <i>Desi</i>      | Ca_Desig_Scaffold00728       | 15927                          | (T/C)       |
| 32927       | CadSNP8522     | <i>Desi</i>      | Ca_Desig_Scaffold00728       | 56727                          | (T/C)       |
| 32928       | CadSNP8523     | <i>Desi</i>      | Ca_Desig_Scaffold00729       | 30472                          | (T/C)       |
| 32929       | CadSNP8524     | <i>Desi</i>      | Ca_Desig_Scaffold00729       | 30501                          | (G/C)       |
| 32930       | CadSNP8525     | <i>Desi</i>      | Ca_Desig_Scaffold00729       | 30527                          | (A/G)       |
| 32931       | CadSNP8526     | <i>Desi</i>      | Ca_Desig_Scaffold00729       | 47924                          | (T/G)       |
| 32932       | CadSNP8527     | <i>Desi</i>      | Ca_Desig_Scaffold00730       | 43618                          | (G/A)       |
| 32933       | CadSNP8528     | <i>Desi</i>      | Ca_Desig_Scaffold00731       | 3289                           | (A/G)       |
| 32934       | CadSNP8529     | <i>Desi</i>      | Ca_Desig_Scaffold00731       | 3780                           | (T/G)       |
| 32935       | CadSNP8530     | <i>Desi</i>      | Ca_Desig_Scaffold00731       | 3779                           | (G/A)       |
| 32936       | CadSNP8531     | <i>Desi</i>      | Ca_Desig_Scaffold00731       | 3749                           | (A/G)       |
| 32937       | CadSNP8532     | <i>Desi</i>      | Ca_Desig_Scaffold00731       | 8596                           | (A/G)       |
| 32938       | CadSNP8533     | <i>Desi</i>      | Ca_Desig_Scaffold00731       | 9110                           | (G/A)       |
| 32939       | CadSNP8534     | <i>Desi</i>      | Ca_Desig_Scaffold00731       | 9088                           | (A/G)       |
| 32940       | CadSNP8535     | <i>Desi</i>      | Ca_Desig_Scaffold00733       | 32155                          | (A/T)       |
| 32941       | CadSNP8536     | <i>Desi</i>      | Ca_Desig_Scaffold00733       | 32158                          | (A/T)       |
| 32942       | CadSNP8537     | <i>Desi</i>      | Ca_Desig_Scaffold00733       | 32160                          | (A/T)       |
| 32943       | CadSNP8538     | <i>Desi</i>      | Ca_Desig_Scaffold00733       | 32167                          | (G/T)       |
| 32944       | CadSNP8539     | <i>Desi</i>      | Ca_Desig_Scaffold00733       | 32169                          | (G/A)       |
| 32945       | CadSNP8540     | <i>Desi</i>      | Ca_Desig_Scaffold00733       | 32172                          | (C/T)       |

| <b>S.N.</b> | <b>SNP IDs</b> | <b>Cultivars</b> | <b>Chromosomes/scaffolds</b> | <b>Physical positions (bp)</b> | <b>SNPs</b> |
|-------------|----------------|------------------|------------------------------|--------------------------------|-------------|
| 32946       | CadSNP8541     | <i>Desi</i>      | Ca_Desig_Scaffold00733       | 32200                          | (A/T)       |
| 32947       | CadSNP8542     | <i>Desi</i>      | Ca_Desig_Scaffold00733       | 32203                          | (G/T)       |
| 32948       | CadSNP8543     | <i>Desi</i>      | Ca_Desig_Scaffold00733       | 32221                          | (T/G)       |
| 32949       | CadSNP8544     | <i>Desi</i>      | Ca_Desig_Scaffold00733       | 32226                          | (C/A)       |
| 32950       | CadSNP8545     | <i>Desi</i>      | Ca_Desig_Scaffold00735       | 2932                           | (T/C)       |
| 32951       | CadSNP8546     | <i>Desi</i>      | Ca_Desig_Scaffold00735       | 27109                          | (T/C)       |
| 32952       | CadSNP8547     | <i>Desi</i>      | Ca_Desig_Scaffold00735       | 27081                          | (T/A)       |
| 32953       | CadSNP8548     | <i>Desi</i>      | Ca_Desig_Scaffold00741       | 98106                          | (A/G)       |
| 32954       | CadSNP8549     | <i>Desi</i>      | Ca_Desig_Scaffold00741       | 98205                          | (G/A)       |
| 32955       | CadSNP8550     | <i>Desi</i>      | Ca_Desig_Scaffold00741       | 114447                         | (T/G)       |
| 32956       | CadSNP8551     | <i>Desi</i>      | Ca_Desig_Scaffold00741       | 120129                         | (A/T)       |
| 32957       | CadSNP8552     | <i>Desi</i>      | Ca_Desig_Scaffold00741       | 120130                         | (G/T)       |
| 32958       | CadSNP8553     | <i>Desi</i>      | Ca_Desig_Scaffold00741       | 120154                         | (C/G)       |
| 32959       | CadSNP8554     | <i>Desi</i>      | Ca_Desig_Scaffold00741       | 120176                         | (A/G)       |
| 32960       | CadSNP8555     | <i>Desi</i>      | Ca_Desig_Scaffold00742       | 19250                          | (A/G)       |
| 32961       | CadSNP8556     | <i>Desi</i>      | Ca_Desig_Scaffold00744       | 39016                          | (A/G)       |
| 32962       | CadSNP8557     | <i>Desi</i>      | Ca_Desig_Scaffold00745       | 19244                          | (T/C)       |
| 32963       | CadSNP8558     | <i>Desi</i>      | Ca_Desig_Scaffold00745       | 40537                          | (T/C)       |
| 32964       | CadSNP8559     | <i>Desi</i>      | Ca_Desig_Scaffold00745       | 61307                          | (A/G)       |
| 32965       | CadSNP8560     | <i>Desi</i>      | Ca_Desig_Scaffold00745       | 63618                          | (A/C)       |
| 32966       | CadSNP8561     | <i>Desi</i>      | Ca_Desig_Scaffold00745       | 63622                          | (G/A)       |
| 32967       | CadSNP8562     | <i>Desi</i>      | Ca_Desig_Scaffold00745       | 63664                          | (A/C)       |
| 32968       | CadSNP8563     | <i>Desi</i>      | Ca_Desig_Scaffold00745       | 64545                          | (A/G)       |
| 32969       | CadSNP8564     | <i>Desi</i>      | Ca_Desig_Scaffold00745       | 66128                          | (C/T)       |
| 32970       | CadSNP8565     | <i>Desi</i>      | Ca_Desig_Scaffold00748       | 30508                          | (A/G)       |
| 32971       | CadSNP8566     | <i>Desi</i>      | Ca_Desig_Scaffold00748       | 70629                          | (T/G)       |
| 32972       | CadSNP8567     | <i>Desi</i>      | Ca_Desig_Scaffold00748       | 72149                          | (T/A)       |
| 32973       | CadSNP8568     | <i>Desi</i>      | Ca_Desig_Scaffold00748       | 72238                          | (A/G)       |
| 32974       | CadSNP8569     | <i>Desi</i>      | Ca_Desig_Scaffold00748       | 72247                          | (A/G)       |
| 32975       | CadSNP8570     | <i>Desi</i>      | Ca_Desig_Scaffold00748       | 72289                          | (A/G)       |
| 32976       | CadSNP8571     | <i>Desi</i>      | Ca_Desig_Scaffold00748       | 72784                          | (G/C)       |
| 32977       | CadSNP8572     | <i>Desi</i>      | Ca_Desig_Scaffold00748       | 72793                          | (C/T)       |
| 32978       | CadSNP8573     | <i>Desi</i>      | Ca_Desig_Scaffold00748       | 72814                          | (G/T)       |
| 32979       | CadSNP8574     | <i>Desi</i>      | Ca_Desig_Scaffold00748       | 100706                         | (A/G)       |
| 32980       | CadSNP8575     | <i>Desi</i>      | Ca_Desig_Scaffold00748       | 111093                         | (G/T)       |
| 32981       | CadSNP8576     | <i>Desi</i>      | Ca_Desig_Scaffold00748       | 120611                         | (C/G)       |
| 32982       | CadSNP8577     | <i>Desi</i>      | Ca_Desig_Scaffold00750       | 37856                          | (A/G)       |
| 32983       | CadSNP8578     | <i>Desi</i>      | Ca_Desig_Scaffold00750       | 42564                          | (G/C)       |

| <b>S.N.</b> | <b>SNP IDs</b> | <b>Cultivars</b> | <b>Chromosomes/scaffolds</b> | <b>Physical positions (bp)</b> | <b>SNPs</b> |
|-------------|----------------|------------------|------------------------------|--------------------------------|-------------|
| 32984       | CadSNP8579     | <i>Desi</i>      | Ca_Desig_Scaffold00751       | 25094                          | (T/C)       |
| 32985       | CadSNP8580     | <i>Desi</i>      | Ca_Desig_Scaffold00751       | 64482                          | (T/C)       |
| 32986       | CadSNP8581     | <i>Desi</i>      | Ca_Desig_Scaffold00751       | 64488                          | (T/C)       |
| 32987       | CadSNP8582     | <i>Desi</i>      | Ca_Desig_Scaffold00751       | 64497                          | (A/C)       |
| 32988       | CadSNP8583     | <i>Desi</i>      | Ca_Desig_Scaffold00751       | 64500                          | (C/T)       |
| 32989       | CadSNP8584     | <i>Desi</i>      | Ca_Desig_Scaffold00751       | 64504                          | (G/T)       |
| 32990       | CadSNP8585     | <i>Desi</i>      | Ca_Desig_Scaffold00751       | 64533                          | (G/A)       |
| 32991       | CadSNP8586     | <i>Desi</i>      | Ca_Desig_Scaffold00751       | 64571                          | (G/C)       |
| 32992       | CadSNP8587     | <i>Desi</i>      | Ca_Desig_Scaffold00751       | 64560                          | (G/A)       |
| 32993       | CadSNP8588     | <i>Desi</i>      | Ca_Desig_Scaffold00751       | 64559                          | (T/C)       |
| 32994       | CadSNP8589     | <i>Desi</i>      | Ca_Desig_Scaffold00751       | 64546                          | (G/T)       |
| 32995       | CadSNP8590     | <i>Desi</i>      | Ca_Desig_Scaffold00751       | 64542                          | (T/A)       |
| 32996       | CadSNP8591     | <i>Desi</i>      | Ca_Desig_Scaffold00751       | 83839                          | (G/C)       |
| 32997       | CadSNP8592     | <i>Desi</i>      | Ca_Desig_Scaffold00751       | 83821                          | (T/G)       |
| 32998       | CadSNP8593     | <i>Desi</i>      | Ca_Desig_Scaffold00751       | 104367                         | (G/C)       |
| 32999       | CadSNP8594     | <i>Desi</i>      | Ca_Desig_Scaffold00751       | 105592                         | (T/A)       |
| 33000       | CadSNP8595     | <i>Desi</i>      | Ca_Desig_Scaffold00752       | 60914                          | (A/C)       |
| 33001       | CadSNP8596     | <i>Desi</i>      | Ca_Desig_Scaffold00753       | 112082                         | (T/G)       |
| 33002       | CadSNP8597     | <i>Desi</i>      | Ca_Desig_Scaffold00753       | 112134                         | (G/T)       |
| 33003       | CadSNP8598     | <i>Desi</i>      | Ca_Desig_Scaffold00754       | 48465                          | (A/C)       |
| 33004       | CadSNP8599     | <i>Desi</i>      | Ca_Desig_Scaffold00760       | 85651                          | (A/C)       |
| 33005       | CadSNP8600     | <i>Desi</i>      | Ca_Desig_Scaffold00760       | 85626                          | (A/G)       |
| 33006       | CadSNP8601     | <i>Desi</i>      | Ca_Desig_Scaffold00760       | 85624                          | (G/C)       |
| 33007       | CadSNP8602     | <i>Desi</i>      | Ca_Desig_Scaffold00760       | 85623                          | (C/T)       |
| 33008       | CadSNP8603     | <i>Desi</i>      | Ca_Desig_Scaffold00760       | 85613                          | (T/A)       |
| 33009       | CadSNP8604     | <i>Desi</i>      | Ca_Desig_Scaffold00760       | 85600                          | (T/G)       |
| 33010       | CadSNP8605     | <i>Desi</i>      | Ca_Desig_Scaffold00760       | 85598                          | (C/G)       |
| 33011       | CadSNP8606     | <i>Desi</i>      | Ca_Desig_Scaffold00760       | 119433                         | (T/C)       |
| 33012       | CadSNP8607     | <i>Desi</i>      | Ca_Desig_Scaffold00760       | 119432                         | (A/G)       |
| 33013       | CadSNP8608     | <i>Desi</i>      | Ca_Desig_Scaffold00760       | 119425                         | (A/G)       |
| 33014       | CadSNP8609     | <i>Desi</i>      | Ca_Desig_Scaffold00760       | 119414                         | (A/G)       |
| 33015       | CadSNP8610     | <i>Desi</i>      | Ca_Desig_Scaffold00760       | 119411                         | (T/G)       |
| 33016       | CadSNP8611     | <i>Desi</i>      | Ca_Desig_Scaffold00762       | 43186                          | (T/A)       |
| 33017       | CadSNP8612     | <i>Desi</i>      | Ca_Desig_Scaffold00762       | 43209                          | (T/C)       |
| 33018       | CadSNP8613     | <i>Desi</i>      | Ca_Desig_Scaffold00762       | 44195                          | (T/C)       |
| 33019       | CadSNP8614     | <i>Desi</i>      | Ca_Desig_Scaffold00762       | 44124                          | (T/A)       |
| 33020       | CadSNP8615     | <i>Desi</i>      | Ca_Desig_Scaffold00762       | 93788                          | (C/G)       |
| 33021       | CadSNP8616     | <i>Desi</i>      | Ca_Desig_Scaffold00762       | 93796                          | (C/T)       |

| <b>S.N.</b> | <b>SNP IDs</b> | <b>Cultivars</b> | <b>Chromosomes/scaffolds</b> | <b>Physical positions (bp)</b> | <b>SNPs</b> |
|-------------|----------------|------------------|------------------------------|--------------------------------|-------------|
| 33022       | CadSNP8617     | <i>Desi</i>      | Ca_Desig_Scaffold00763       | 95271                          | (T/C)       |
| 33023       | CadSNP8618     | <i>Desi</i>      | Ca_Desig_Scaffold00767       | 11907                          | (C/T)       |
| 33024       | CadSNP8619     | <i>Desi</i>      | Ca_Desig_Scaffold00767       | 14175                          | (A/G)       |
| 33025       | CadSNP8620     | <i>Desi</i>      | Ca_Desig_Scaffold00767       | 14186                          | (A/G)       |
| 33026       | CadSNP8621     | <i>Desi</i>      | Ca_Desig_Scaffold00767       | 17926                          | (T/A)       |
| 33027       | CadSNP8622     | <i>Desi</i>      | Ca_Desig_Scaffold00768       | 37708                          | (T/G)       |
| 33028       | CadSNP8623     | <i>Desi</i>      | Ca_Desig_Scaffold00768       | 40836                          | (G/A)       |
| 33029       | CadSNP8624     | <i>Desi</i>      | Ca_Desig_Scaffold00768       | 88105                          | (A/C)       |
| 33030       | CadSNP8625     | <i>Desi</i>      | Ca_Desig_Scaffold00768       | 88077                          | (G/A)       |
| 33031       | CadSNP8626     | <i>Desi</i>      | Ca_Desig_Scaffold00769       | 21736                          | (C/T)       |
| 33032       | CadSNP8627     | <i>Desi</i>      | Ca_Desig_Scaffold00770       | 18242                          | (C/A)       |
| 33033       | CadSNP8628     | <i>Desi</i>      | Ca_Desig_Scaffold00770       | 85802                          | (C/G)       |
| 33034       | CadSNP8629     | <i>Desi</i>      | Ca_Desig_Scaffold00770       | 85835                          | (C/T)       |
| 33035       | CadSNP8630     | <i>Desi</i>      | Ca_Desig_Scaffold00770       | 89214                          | (T/C)       |
| 33036       | CadSNP8631     | <i>Desi</i>      | Ca_Desig_Scaffold00770       | 89210                          | (T/A)       |
| 33037       | CadSNP8632     | <i>Desi</i>      | Ca_Desig_Scaffold00770       | 89206                          | (A/G)       |
| 33038       | CadSNP8633     | <i>Desi</i>      | Ca_Desig_Scaffold00770       | 89205                          | (C/A)       |
| 33039       | CadSNP8634     | <i>Desi</i>      | Ca_Desig_Scaffold00770       | 101549                         | (G/T)       |
| 33040       | CadSNP8635     | <i>Desi</i>      | Ca_Desig_Scaffold00772       | 65633                          | (G/A)       |
| 33041       | CadSNP8636     | <i>Desi</i>      | Ca_Desig_Scaffold00772       | 97818                          | (G/T)       |
| 33042       | CadSNP8637     | <i>Desi</i>      | Ca_Desig_Scaffold00774       | 104837                         | (A/G)       |
| 33043       | CadSNP8638     | <i>Desi</i>      | Ca_Desig_Scaffold00776       | 18777                          | (A/G)       |
| 33044       | CadSNP8639     | <i>Desi</i>      | Ca_Desig_Scaffold00776       | 69315                          | (A/G)       |
| 33045       | CadSNP8640     | <i>Desi</i>      | Ca_Desig_Scaffold00776       | 87753                          | (C/T)       |
| 33046       | CadSNP8641     | <i>Desi</i>      | Ca_Desig_Scaffold00776       | 92322                          | (T/C)       |
| 33047       | CadSNP8642     | <i>Desi</i>      | Ca_Desig_Scaffold00776       | 97215                          | (T/C)       |
| 33048       | CadSNP8643     | <i>Desi</i>      | Ca_Desig_Scaffold00776       | 98563                          | (C/G)       |
| 33049       | CadSNP8644     | <i>Desi</i>      | Ca_Desig_Scaffold00776       | 99806                          | (G/C)       |
| 33050       | CadSNP8645     | <i>Desi</i>      | Ca_Desig_Scaffold00776       | 99762                          | (T/C)       |
| 33051       | CadSNP8646     | <i>Desi</i>      | Ca_Desig_Scaffold00777       | 10284                          | (G/A)       |
| 33052       | CadSNP8647     | <i>Desi</i>      | Ca_Desig_Scaffold00777       | 45163                          | (C/A)       |
| 33053       | CadSNP8648     | <i>Desi</i>      | Ca_Desig_Scaffold00777       | 45166                          | (A/C)       |
| 33054       | CadSNP8649     | <i>Desi</i>      | Ca_Desig_Scaffold00777       | 100240                         | (A/C)       |
| 33055       | CadSNP8650     | <i>Desi</i>      | Ca_Desig_Scaffold00777       | 101105                         | (A/G)       |
| 33056       | CadSNP8651     | <i>Desi</i>      | Ca_Desig_Scaffold00777       | 101331                         | (A/G)       |
| 33057       | CadSNP8652     | <i>Desi</i>      | Ca_Desig_Scaffold00777       | 102350                         | (G/A)       |
| 33058       | CadSNP8653     | <i>Desi</i>      | Ca_Desig_Scaffold00778       | 18428                          | (A/C)       |
| 33059       | CadSNP8654     | <i>Desi</i>      | Ca_Desig_Scaffold00778       | 49409                          | (G/A)       |



| <b>S.N.</b> | <b>SNP IDs</b> | <b>Cultivars</b> | <b>Chromosomes/scaffolds</b> | <b>Physical positions (bp)</b> | <b>SNPs</b> |
|-------------|----------------|------------------|------------------------------|--------------------------------|-------------|
| 33060       | CadSNP8655     | <i>Desi</i>      | Ca_Desig_Scaffold00778       | 49451                          | (A/G)       |
| 33061       | CadSNP8656     | <i>Desi</i>      | Ca_Desig_Scaffold00778       | 49472                          | (T/C)       |
| 33062       | CadSNP8657     | <i>Desi</i>      | Ca_Desig_Scaffold00778       | 49487                          | (G/T)       |
| 33063       | CadSNP8658     | <i>Desi</i>      | Ca_Desig_Scaffold00778       | 56241                          | (T/A)       |
| 33064       | CadSNP8659     | <i>Desi</i>      | Ca_Desig_Scaffold00778       | 63778                          | (T/A)       |
| 33065       | CadSNP8660     | <i>Desi</i>      | Ca_Desig_Scaffold00778       | 76700                          | (A/G)       |
| 33066       | CadSNP8661     | <i>Desi</i>      | Ca_Desig_Scaffold00778       | 76771                          | (C/T)       |
| 33067       | CadSNP8662     | <i>Desi</i>      | Ca_Desig_Scaffold00778       | 76792                          | (G/A)       |
| 33068       | CadSNP8663     | <i>Desi</i>      | Ca_Desig_Scaffold00779       | 77199                          | (T/C)       |
| 33069       | CadSNP8664     | <i>Desi</i>      | Ca_Desig_Scaffold00782       | 33500                          | (A/C)       |
| 33070       | CadSNP8665     | <i>Desi</i>      | Ca_Desig_Scaffold00782       | 58151                          | (T/C)       |
| 33071       | CadSNP8666     | <i>Desi</i>      | Ca_Desig_Scaffold00782       | 63762                          | (A/C)       |
| 33072       | CadSNP8667     | <i>Desi</i>      | Ca_Desig_Scaffold00782       | 63784                          | (A/G)       |
| 33073       | CadSNP8668     | <i>Desi</i>      | Ca_Desig_Scaffold00782       | 63807                          | (T/C)       |
| 33074       | CadSNP8669     | <i>Desi</i>      | Ca_Desig_Scaffold00782       | 63827                          | (A/G)       |
| 33075       | CadSNP8670     | <i>Desi</i>      | Ca_Desig_Scaffold00782       | 76565                          | (C/T)       |
| 33076       | CadSNP8671     | <i>Desi</i>      | Ca_Desig_Scaffold00787       | 47271                          | (T/G)       |
| 33077       | CadSNP8672     | <i>Desi</i>      | Ca_Desig_Scaffold00787       | 47390                          | (C/T)       |
| 33078       | CadSNP8673     | <i>Desi</i>      | Ca_Desig_Scaffold00787       | 47385                          | (C/A)       |
| 33079       | CadSNP8674     | <i>Desi</i>      | Ca_Desig_Scaffold00787       | 65601                          | (A/C)       |
| 33080       | CadSNP8675     | <i>Desi</i>      | Ca_Desig_Scaffold00787       | 65602                          | (G/T)       |
| 33081       | CadSNP8676     | <i>Desi</i>      | Ca_Desig_Scaffold00788       | 72830                          | (C/A)       |
| 33082       | CadSNP8677     | <i>Desi</i>      | Ca_Desig_Scaffold00788       | 74672                          | (G/A)       |
| 33083       | CadSNP8678     | <i>Desi</i>      | Ca_Desig_Scaffold00788       | 76038                          | (C/T)       |
| 33084       | CadSNP8679     | <i>Desi</i>      | Ca_Desig_Scaffold00788       | 76093                          | (G/A)       |
| 33085       | CadSNP8680     | <i>Desi</i>      | Ca_Desig_Scaffold00789       | 38124                          | (C/T)       |
| 33086       | CadSNP8681     | <i>Desi</i>      | Ca_Desig_Scaffold00789       | 38232                          | (G/A)       |
| 33087       | CadSNP8682     | <i>Desi</i>      | Ca_Desig_Scaffold00789       | 39722                          | (A/T)       |
| 33088       | CadSNP8683     | <i>Desi</i>      | Ca_Desig_Scaffold00789       | 40959                          | (A/G)       |
| 33089       | CadSNP8684     | <i>Desi</i>      | Ca_Desig_Scaffold00789       | 40948                          | (A/G)       |
| 33090       | CadSNP8685     | <i>Desi</i>      | Ca_Desig_Scaffold00789       | 42161                          | (C/A)       |
| 33091       | CadSNP8686     | <i>Desi</i>      | Ca_Desig_Scaffold00789       | 88426                          | (C/G)       |
| 33092       | CadSNP8687     | <i>Desi</i>      | Ca_Desig_Scaffold00789       | 88557                          | (T/G)       |
| 33093       | CadSNP8688     | <i>Desi</i>      | Ca_Desig_Scaffold00789       | 89029                          | (A/G)       |
| 33094       | CadSNP8689     | <i>Desi</i>      | Ca_Desig_Scaffold00789       | 113634                         | (G/C)       |
| 33095       | CadSNP8690     | <i>Desi</i>      | Ca_Desig_Scaffold00789       | 113665                         | (A/T)       |
| 33096       | CadSNP8691     | <i>Desi</i>      | Ca_Desig_Scaffold00790       | 75293                          | (C/G)       |
| 33097       | CadSNP8692     | <i>Desi</i>      | Ca_Desig_Scaffold00790       | 75382                          | (G/A)       |

| <b>S.N.</b> | <b>SNP IDs</b> | <b>Cultivars</b> | <b>Chromosomes/scaffolds</b> | <b>Physical positions (bp)</b> | <b>SNPs</b> |
|-------------|----------------|------------------|------------------------------|--------------------------------|-------------|
| 33098       | CadSNP8693     | <i>Desi</i>      | Ca_Desig_Scaffold00790       | 75418                          | (A/G)       |
| 33099       | CadSNP8694     | <i>Desi</i>      | Ca_Desig_Scaffold00790       | 75438                          | (T/A)       |
| 33100       | CadSNP8695     | <i>Desi</i>      | Ca_Desig_Scaffold00790       | 75574                          | (G/A)       |
| 33101       | CadSNP8696     | <i>Desi</i>      | Ca_Desig_Scaffold00791       | 25560                          | (T/A)       |
| 33102       | CadSNP8697     | <i>Desi</i>      | Ca_Desig_Scaffold00791       | 34300                          | (T/C)       |
| 33103       | CadSNP8698     | <i>Desi</i>      | Ca_Desig_Scaffold00792       | 11129                          | (G/A)       |
| 33104       | CadSNP8699     | <i>Desi</i>      | Ca_Desig_Scaffold00792       | 11139                          | (G/A)       |
| 33105       | CadSNP8700     | <i>Desi</i>      | Ca_Desig_Scaffold00792       | 11169                          | (A/T)       |
| 33106       | CadSNP8701     | <i>Desi</i>      | Ca_Desig_Scaffold00792       | 11188                          | (G/C)       |
| 33107       | CadSNP8702     | <i>Desi</i>      | Ca_Desig_Scaffold00792       | 11199                          | (G/A)       |
| 33108       | CadSNP8703     | <i>Desi</i>      | Ca_Desig_Scaffold00792       | 33165                          | (A/T)       |
| 33109       | CadSNP8704     | <i>Desi</i>      | Ca_Desig_Scaffold00792       | 33172                          | (T/A)       |
| 33110       | CadSNP8705     | <i>Desi</i>      | Ca_Desig_Scaffold00794       | 20636                          | (G/A)       |
| 33111       | CadSNP8706     | <i>Desi</i>      | Ca_Desig_Scaffold00795       | 14940                          | (T/C)       |
| 33112       | CadSNP8707     | <i>Desi</i>      | Ca_Desig_Scaffold00795       | 15151                          | (C/G)       |
| 33113       | CadSNP8708     | <i>Desi</i>      | Ca_Desig_Scaffold00795       | 15168                          | (G/A)       |
| 33114       | CadSNP8709     | <i>Desi</i>      | Ca_Desig_Scaffold00795       | 15181                          | (T/C)       |
| 33115       | CadSNP8710     | <i>Desi</i>      | Ca_Desig_Scaffold00795       | 15212                          | (T/A)       |
| 33116       | CadSNP8711     | <i>Desi</i>      | Ca_Desig_Scaffold00795       | 15272                          | (G/T)       |
| 33117       | CadSNP8712     | <i>Desi</i>      | Ca_Desig_Scaffold00795       | 15252                          | (C/T)       |
| 33118       | CadSNP8713     | <i>Desi</i>      | Ca_Desig_Scaffold00795       | 70892                          | (C/T)       |
| 33119       | CadSNP8714     | <i>Desi</i>      | Ca_Desig_Scaffold00795       | 70978                          | (G/C)       |
| 33120       | CadSNP8715     | <i>Desi</i>      | Ca_Desig_Scaffold00795       | 90453                          | (A/G)       |
| 33121       | CadSNP8716     | <i>Desi</i>      | Ca_Desig_Scaffold00797       | 21608                          | (G/A)       |
| 33122       | CadSNP8717     | <i>Desi</i>      | Ca_Desig_Scaffold00797       | 28341                          | (T/C)       |
| 33123       | CadSNP8718     | <i>Desi</i>      | Ca_Desig_Scaffold00797       | 97076                          | (C/T)       |
| 33124       | CadSNP8719     | <i>Desi</i>      | Ca_Desig_Scaffold00797       | 97106                          | (A/T)       |
| 33125       | CadSNP8720     | <i>Desi</i>      | Ca_Desig_Scaffold00797       | 99267                          | (A/G)       |
| 33126       | CadSNP8721     | <i>Desi</i>      | Ca_Desig_Scaffold00798       | 26164                          | (A/G)       |
| 33127       | CadSNP8722     | <i>Desi</i>      | Ca_Desig_Scaffold00798       | 44811                          | (A/C)       |
| 33128       | CadSNP8723     | <i>Desi</i>      | Ca_Desig_Scaffold00801       | 6081                           | (T/G)       |
| 33129       | CadSNP8724     | <i>Desi</i>      | Ca_Desig_Scaffold00801       | 6286                           | (G/A)       |
| 33130       | CadSNP8725     | <i>Desi</i>      | Ca_Desig_Scaffold00801       | 6420                           | (G/C)       |
| 33131       | CadSNP8726     | <i>Desi</i>      | Ca_Desig_Scaffold00801       | 10575                          | (A/C)       |
| 33132       | CadSNP8727     | <i>Desi</i>      | Ca_Desig_Scaffold00801       | 13731                          | (G/A)       |
| 33133       | CadSNP8728     | <i>Desi</i>      | Ca_Desig_Scaffold00801       | 74341                          | (A/C)       |
| 33134       | CadSNP8729     | <i>Desi</i>      | Ca_Desig_Scaffold00801       | 74354                          | (A/T)       |
| 33135       | CadSNP8730     | <i>Desi</i>      | Ca_Desig_Scaffold00801       | 74436                          | (A/C)       |

| <b>S.N.</b> | <b>SNP IDs</b> | <b>Cultivars</b> | <b>Chromosomes/scaffolds</b> | <b>Physical positions (bp)</b> | <b>SNPs</b> |
|-------------|----------------|------------------|------------------------------|--------------------------------|-------------|
| 33136       | CadSNP8731     | <i>Desi</i>      | Ca_Desig_Scaffold00801       | 75310                          | (C/T)       |
| 33137       | CadSNP8732     | <i>Desi</i>      | Ca_Desig_Scaffold00804       | 105551                         | (C/T)       |
| 33138       | CadSNP8733     | <i>Desi</i>      | Ca_Desig_Scaffold00806       | 48657                          | (G/C)       |
| 33139       | CadSNP8734     | <i>Desi</i>      | Ca_Desig_Scaffold00806       | 62201                          | (G/C)       |
| 33140       | CadSNP8735     | <i>Desi</i>      | Ca_Desig_Scaffold00806       | 62392                          | (C/A)       |
| 33141       | CadSNP8736     | <i>Desi</i>      | Ca_Desig_Scaffold00806       | 62350                          | (C/T)       |
| 33142       | CadSNP8737     | <i>Desi</i>      | Ca_Desig_Scaffold00806       | 62454                          | (A/T)       |
| 33143       | CadSNP8738     | <i>Desi</i>      | Ca_Desig_Scaffold00806       | 62462                          | (A/T)       |
| 33144       | CadSNP8739     | <i>Desi</i>      | Ca_Desig_Scaffold00806       | 62463                          | (G/A)       |
| 33145       | CadSNP8740     | <i>Desi</i>      | Ca_Desig_Scaffold00806       | 62479                          | (A/G)       |
| 33146       | CadSNP8741     | <i>Desi</i>      | Ca_Desig_Scaffold00806       | 62480                          | (T/C)       |
| 33147       | CadSNP8742     | <i>Desi</i>      | Ca_Desig_Scaffold00806       | 62486                          | (T/C)       |
| 33148       | CadSNP8743     | <i>Desi</i>      | Ca_Desig_Scaffold00806       | 62488                          | (C/T)       |
| 33149       | CadSNP8744     | <i>Desi</i>      | Ca_Desig_Scaffold00806       | 67314                          | (C/T)       |
| 33150       | CadSNP8745     | <i>Desi</i>      | Ca_Desig_Scaffold00806       | 67542                          | (G/C)       |
| 33151       | CadSNP8746     | <i>Desi</i>      | Ca_Desig_Scaffold00806       | 71219                          | (C/G)       |
| 33152       | CadSNP8747     | <i>Desi</i>      | Ca_Desig_Scaffold00806       | 74434                          | (C/A)       |
| 33153       | CadSNP8748     | <i>Desi</i>      | Ca_Desig_Scaffold00806       | 95130                          | (C/T)       |
| 33154       | CadSNP8749     | <i>Desi</i>      | Ca_Desig_Scaffold00806       | 95148                          | (A/G)       |
| 33155       | CadSNP8750     | <i>Desi</i>      | Ca_Desig_Scaffold00806       | 95154                          | (T/C)       |
| 33156       | CadSNP8751     | <i>Desi</i>      | Ca_Desig_Scaffold00806       | 95182                          | (G/T)       |
| 33157       | CadSNP8752     | <i>Desi</i>      | Ca_Desig_Scaffold00806       | 95306                          | (A/G)       |
| 33158       | CadSNP8753     | <i>Desi</i>      | Ca_Desig_Scaffold00806       | 95341                          | (A/G)       |
| 33159       | CadSNP8754     | <i>Desi</i>      | Ca_Desig_Scaffold00806       | 95344                          | (A/C)       |
| 33160       | CadSNP8755     | <i>Desi</i>      | Ca_Desig_Scaffold00806       | 95345                          | (A/G)       |
| 33161       | CadSNP8756     | <i>Desi</i>      | Ca_Desig_Scaffold00806       | 105451                         | (C/T)       |
| 33162       | CadSNP8757     | <i>Desi</i>      | Ca_Desig_Scaffold00807       | 42801                          | (C/T)       |
| 33163       | CadSNP8758     | <i>Desi</i>      | Ca_Desig_Scaffold00807       | 42841                          | (G/C)       |
| 33164       | CadSNP8759     | <i>Desi</i>      | Ca_Desig_Scaffold00807       | 42847                          | (C/T)       |
| 33165       | CadSNP8760     | <i>Desi</i>      | Ca_Desig_Scaffold00807       | 42855                          | (G/A)       |
| 33166       | CadSNP8761     | <i>Desi</i>      | Ca_Desig_Scaffold00807       | 42971                          | (C/A)       |
| 33167       | CadSNP8762     | <i>Desi</i>      | Ca_Desig_Scaffold00807       | 42924                          | (G/A)       |
| 33168       | CadSNP8763     | <i>Desi</i>      | Ca_Desig_Scaffold00809       | 37929                          | (T/G)       |
| 33169       | CadSNP8764     | <i>Desi</i>      | Ca_Desig_Scaffold00809       | 38038                          | (C/G)       |
| 33170       | CadSNP8765     | <i>Desi</i>      | Ca_Desig_Scaffold00810       | 78334                          | (G/A)       |
| 33171       | CadSNP8766     | <i>Desi</i>      | Ca_Desig_Scaffold00810       | 78384                          | (A/G)       |
| 33172       | CadSNP8767     | <i>Desi</i>      | Ca_Desig_Scaffold00810       | 78396                          | (A/G)       |
| 33173       | CadSNP8768     | <i>Desi</i>      | Ca_Desig_Scaffold00810       | 78402                          | (T/G)       |

| <b>S.N.</b> | <b>SNP IDs</b> | <b>Cultivars</b> | <b>Chromosomes/scaffolds</b> | <b>Physical positions (bp)</b> | <b>SNPs</b> |
|-------------|----------------|------------------|------------------------------|--------------------------------|-------------|
| 33174       | CadSNP8769     | <i>Desi</i>      | Ca_Desig_Scaffold00812       | 52                             | (T/A)       |
| 33175       | CadSNP8770     | <i>Desi</i>      | Ca_Desig_Scaffold00812       | 68                             | (C/T)       |
| 33176       | CadSNP8771     | <i>Desi</i>      | Ca_Desig_Scaffold00812       | 50762                          | (T/C)       |
| 33177       | CadSNP8772     | <i>Desi</i>      | Ca_Desig_Scaffold00813       | 53524                          | (G/T)       |
| 33178       | CadSNP8773     | <i>Desi</i>      | Ca_Desig_Scaffold00815       | 16757                          | (C/T)       |
| 33179       | CadSNP8774     | <i>Desi</i>      | Ca_Desig_Scaffold00815       | 17958                          | (G/T)       |
| 33180       | CadSNP8775     | <i>Desi</i>      | Ca_Desig_Scaffold00815       | 17959                          | (A/T)       |
| 33181       | CadSNP8776     | <i>Desi</i>      | Ca_Desig_Scaffold00815       | 17964                          | (C/T)       |
| 33182       | CadSNP8777     | <i>Desi</i>      | Ca_Desig_Scaffold00815       | 18000                          | (G/T)       |
| 33183       | CadSNP8778     | <i>Desi</i>      | Ca_Desig_Scaffold00815       | 18055                          | (T/C)       |
| 33184       | CadSNP8779     | <i>Desi</i>      | Ca_Desig_Scaffold00815       | 18126                          | (A/G)       |
| 33185       | CadSNP8780     | <i>Desi</i>      | Ca_Desig_Scaffold00815       | 18258                          | (C/T)       |
| 33186       | CadSNP8781     | <i>Desi</i>      | Ca_Desig_Scaffold00815       | 18315                          | (G/C)       |
| 33187       | CadSNP8782     | <i>Desi</i>      | Ca_Desig_Scaffold00815       | 36265                          | (T/G)       |
| 33188       | CadSNP8783     | <i>Desi</i>      | Ca_Desig_Scaffold00815       | 38035                          | (T/G)       |
| 33189       | CadSNP8784     | <i>Desi</i>      | Ca_Desig_Scaffold00815       | 38235                          | (A/G)       |
| 33190       | CadSNP8785     | <i>Desi</i>      | Ca_Desig_Scaffold00815       | 62723                          | (T/C)       |
| 33191       | CadSNP8786     | <i>Desi</i>      | Ca_Desig_Scaffold00815       | 113183                         | (G/A)       |
| 33192       | CadSNP8787     | <i>Desi</i>      | Ca_Desig_Scaffold00816       | 59509                          | (G/C)       |
| 33193       | CadSNP8788     | <i>Desi</i>      | Ca_Desig_Scaffold00816       | 59515                          | (G/A)       |
| 33194       | CadSNP8789     | <i>Desi</i>      | Ca_Desig_Scaffold00816       | 59504                          | (A/C)       |
| 33195       | CadSNP8790     | <i>Desi</i>      | Ca_Desig_Scaffold00816       | 59627                          | (A/C)       |
| 33196       | CadSNP8791     | <i>Desi</i>      | Ca_Desig_Scaffold00816       | 59621                          | (G/A)       |
| 33197       | CadSNP8792     | <i>Desi</i>      | Ca_Desig_Scaffold00816       | 59575                          | (C/T)       |
| 33198       | CadSNP8793     | <i>Desi</i>      | Ca_Desig_Scaffold00822       | 62873                          | (G/C)       |
| 33199       | CadSNP8794     | <i>Desi</i>      | Ca_Desig_Scaffold00822       | 73732                          | (C/A)       |
| 33200       | CadSNP8795     | <i>Desi</i>      | Ca_Desig_Scaffold00822       | 81269                          | (G/A)       |
| 33201       | CadSNP8796     | <i>Desi</i>      | Ca_Desig_Scaffold00822       | 81233                          | (C/A)       |
| 33202       | CadSNP8797     | <i>Desi</i>      | Ca_Desig_Scaffold00822       | 81230                          | (T/C)       |
| 33203       | CadSNP8798     | <i>Desi</i>      | Ca_Desig_Scaffold00822       | 81326                          | (C/A)       |
| 33204       | CadSNP8799     | <i>Desi</i>      | Ca_Desig_Scaffold00822       | 81469                          | (C/G)       |
| 33205       | CadSNP8800     | <i>Desi</i>      | Ca_Desig_Scaffold00822       | 81446                          | (T/C)       |
| 33206       | CadSNP8801     | <i>Desi</i>      | Ca_Desig_Scaffold00822       | 85207                          | (T/A)       |
| 33207       | CadSNP8802     | <i>Desi</i>      | Ca_Desig_Scaffold00822       | 85212                          | (A/G)       |
| 33208       | CadSNP8803     | <i>Desi</i>      | Ca_Desig_Scaffold00823       | 21894                          | (C/T)       |
| 33209       | CadSNP8804     | <i>Desi</i>      | Ca_Desig_Scaffold00823       | 22000                          | (G/C)       |
| 33210       | CadSNP8805     | <i>Desi</i>      | Ca_Desig_Scaffold00823       | 22609                          | (T/C)       |
| 33211       | CadSNP8806     | <i>Desi</i>      | Ca_Desig_Scaffold00823       | 86703                          | (G/A)       |

| <b>S.N.</b> | <b>SNP IDs</b> | <b>Cultivars</b> | <b>Chromosomes/scaffolds</b> | <b>Physical positions (bp)</b> | <b>SNPs</b> |
|-------------|----------------|------------------|------------------------------|--------------------------------|-------------|
| 33212       | CadSNP8807     | <i>Desi</i>      | Ca_Desig_Scaffold00824       | 42501                          | (C/T)       |
| 33213       | CadSNP8808     | <i>Desi</i>      | Ca_Desig_Scaffold00824       | 44982                          | (A/G)       |
| 33214       | CadSNP8809     | <i>Desi</i>      | Ca_Desig_Scaffold00824       | 45017                          | (C/T)       |
| 33215       | CadSNP8810     | <i>Desi</i>      | Ca_Desig_Scaffold00824       | 45042                          | (G/A)       |
| 33216       | CadSNP8811     | <i>Desi</i>      | Ca_Desig_Scaffold00824       | 70517                          | (T/C)       |
| 33217       | CadSNP8812     | <i>Desi</i>      | Ca_Desig_Scaffold00824       | 70484                          | (G/A)       |
| 33218       | CadSNP8813     | <i>Desi</i>      | Ca_Desig_Scaffold00824       | 70457                          | (T/C)       |
| 33219       | CadSNP8814     | <i>Desi</i>      | Ca_Desig_Scaffold00824       | 70454                          | (T/C)       |
| 33220       | CadSNP8815     | <i>Desi</i>      | Ca_Desig_Scaffold00825       | 56268                          | (T/A)       |
| 33221       | CadSNP8816     | <i>Desi</i>      | Ca_Desig_Scaffold00826       | 95399                          | (T/C)       |
| 33222       | CadSNP8817     | <i>Desi</i>      | Ca_Desig_Scaffold00829       | 10036                          | (G/T)       |
| 33223       | CadSNP8818     | <i>Desi</i>      | Ca_Desig_Scaffold00829       | 10077                          | (T/G)       |
| 33224       | CadSNP8819     | <i>Desi</i>      | Ca_Desig_Scaffold00829       | 10080                          | (T/G)       |
| 33225       | CadSNP8820     | <i>Desi</i>      | Ca_Desig_Scaffold00829       | 10101                          | (T/G)       |
| 33226       | CadSNP8821     | <i>Desi</i>      | Ca_Desig_Scaffold00829       | 60336                          | (G/C)       |
| 33227       | CadSNP8822     | <i>Desi</i>      | Ca_Desig_Scaffold00829       | 60342                          | (A/G)       |
| 33228       | CadSNP8823     | <i>Desi</i>      | Ca_Desig_Scaffold00829       | 60462                          | (T/C)       |
| 33229       | CadSNP8824     | <i>Desi</i>      | Ca_Desig_Scaffold00829       | 60409                          | (A/C)       |
| 33230       | CadSNP8825     | <i>Desi</i>      | Ca_Desig_Scaffold00833       | 15499                          | (T/C)       |
| 33231       | CadSNP8826     | <i>Desi</i>      | Ca_Desig_Scaffold00833       | 26283                          | (A/T)       |
| 33232       | CadSNP8827     | <i>Desi</i>      | Ca_Desig_Scaffold00833       | 26293                          | (G/T)       |
| 33233       | CadSNP8828     | <i>Desi</i>      | Ca_Desig_Scaffold00833       | 26295                          | (A/T)       |
| 33234       | CadSNP8829     | <i>Desi</i>      | Ca_Desig_Scaffold00833       | 26296                          | (A/G)       |
| 33235       | CadSNP8830     | <i>Desi</i>      | Ca_Desig_Scaffold00833       | 26294                          | (G/C)       |
| 33236       | CadSNP8831     | <i>Desi</i>      | Ca_Desig_Scaffold00833       | 28822                          | (A/G)       |
| 33237       | CadSNP8832     | <i>Desi</i>      | Ca_Desig_Scaffold00833       | 84456                          | (G/A)       |
| 33238       | CadSNP8833     | <i>Desi</i>      | Ca_Desig_Scaffold00833       | 97304                          | (C/A)       |
| 33239       | CadSNP8834     | <i>Desi</i>      | Ca_Desig_Scaffold00835       | 11978                          | (C/T)       |
| 33240       | CadSNP8835     | <i>Desi</i>      | Ca_Desig_Scaffold00835       | 34567                          | (C/A)       |
| 33241       | CadSNP8836     | <i>Desi</i>      | Ca_Desig_Scaffold00835       | 42197                          | (T/G)       |
| 33242       | CadSNP8837     | <i>Desi</i>      | Ca_Desig_Scaffold00835       | 62492                          | (T/C)       |
| 33243       | CadSNP8838     | <i>Desi</i>      | Ca_Desig_Scaffold00835       | 64423                          | (T/A)       |
| 33244       | CadSNP8839     | <i>Desi</i>      | Ca_Desig_Scaffold00835       | 64464                          | (T/G)       |
| 33245       | CadSNP8840     | <i>Desi</i>      | Ca_Desig_Scaffold00835       | 64536                          | (A/T)       |
| 33246       | CadSNP8841     | <i>Desi</i>      | Ca_Desig_Scaffold00837       | 67346                          | (T/A)       |
| 33247       | CadSNP8842     | <i>Desi</i>      | Ca_Desig_Scaffold00837       | 67366                          | (A/C)       |
| 33248       | CadSNP8843     | <i>Desi</i>      | Ca_Desig_Scaffold00837       | 92981                          | (G/A)       |
| 33249       | CadSNP8844     | <i>Desi</i>      | Ca_Desig_Scaffold00837       | 108493                         | (G/A)       |

| <b>S.N.</b> | <b>SNP IDs</b> | <b>Cultivars</b> | <b>Chromosomes/scaffolds</b> | <b>Physical positions (bp)</b> | <b>SNPs</b> |
|-------------|----------------|------------------|------------------------------|--------------------------------|-------------|
| 33250       | CadSNP8845     | <i>Desi</i>      | Ca_Desig_Scaffold00837       | 108510                         | (C/A)       |
| 33251       | CadSNP8846     | <i>Desi</i>      | Ca_Desig_Scaffold00840       | 35183                          | (A/T)       |
| 33252       | CadSNP8847     | <i>Desi</i>      | Ca_Desig_Scaffold00840       | 86675                          | (T/A)       |
| 33253       | CadSNP8848     | <i>Desi</i>      | Ca_Desig_Scaffold00844       | 11245                          | (A/C)       |
| 33254       | CadSNP8849     | <i>Desi</i>      | Ca_Desig_Scaffold00844       | 100268                         | (A/G)       |
| 33255       | CadSNP8850     | <i>Desi</i>      | Ca_Desig_Scaffold00844       | 100250                         | (T/C)       |
| 33256       | CadSNP8851     | <i>Desi</i>      | Ca_Desig_Scaffold00850       | 19019                          | (G/T)       |
| 33257       | CadSNP8852     | <i>Desi</i>      | Ca_Desig_Scaffold00850       | 19190                          | (A/G)       |
| 33258       | CadSNP8853     | <i>Desi</i>      | Ca_Desig_Scaffold00850       | 19871                          | (C/T)       |
| 33259       | CadSNP8854     | <i>Desi</i>      | Ca_Desig_Scaffold00850       | 19943                          | (A/G)       |
| 33260       | CadSNP8855     | <i>Desi</i>      | Ca_Desig_Scaffold00850       | 41792                          | (A/G)       |
| 33261       | CadSNP8856     | <i>Desi</i>      | Ca_Desig_Scaffold00850       | 41841                          | (A/T)       |
| 33262       | CadSNP8857     | <i>Desi</i>      | Ca_Desig_Scaffold00850       | 86737                          | (T/C)       |
| 33263       | CadSNP8858     | <i>Desi</i>      | Ca_Desig_Scaffold00850       | 87375                          | (C/G)       |
| 33264       | CadSNP8859     | <i>Desi</i>      | Ca_Desig_Scaffold00850       | 91040                          | (A/G)       |
| 33265       | CadSNP8860     | <i>Desi</i>      | Ca_Desig_Scaffold00851       | 30681                          | (T/G)       |
| 33266       | CadSNP8861     | <i>Desi</i>      | Ca_Desig_Scaffold00851       | 33030                          | (G/A)       |
| 33267       | CadSNP8862     | <i>Desi</i>      | Ca_Desig_Scaffold00851       | 40192                          | (C/T)       |
| 33268       | CadSNP8863     | <i>Desi</i>      | Ca_Desig_Scaffold00851       | 40390                          | (T/C)       |
| 33269       | CadSNP8864     | <i>Desi</i>      | Ca_Desig_Scaffold00851       | 40459                          | (G/A)       |
| 33270       | CadSNP8865     | <i>Desi</i>      | Ca_Desig_Scaffold00851       | 75585                          | (T/C)       |
| 33271       | CadSNP8866     | <i>Desi</i>      | Ca_Desig_Scaffold00851       | 77221                          | (G/T)       |
| 33272       | CadSNP8867     | <i>Desi</i>      | Ca_Desig_Scaffold00851       | 77506                          | (T/C)       |
| 33273       | CadSNP8868     | <i>Desi</i>      | Ca_Desig_Scaffold00851       | 77725                          | (A/G)       |
| 33274       | CadSNP8869     | <i>Desi</i>      | Ca_Desig_Scaffold00852       | 10176                          | (T/C)       |
| 33275       | CadSNP8870     | <i>Desi</i>      | Ca_Desig_Scaffold00852       | 10329                          | (G/A)       |
| 33276       | CadSNP8871     | <i>Desi</i>      | Ca_Desig_Scaffold00852       | 10310                          | (G/A)       |
| 33277       | CadSNP8872     | <i>Desi</i>      | Ca_Desig_Scaffold00852       | 10278                          | (T/C)       |
| 33278       | CadSNP8873     | <i>Desi</i>      | Ca_Desig_Scaffold00852       | 19390                          | (T/C)       |
| 33279       | CadSNP8874     | <i>Desi</i>      | Ca_Desig_Scaffold00852       | 19387                          | (G/A)       |
| 33280       | CadSNP8875     | <i>Desi</i>      | Ca_Desig_Scaffold00852       | 31617                          | (A/T)       |
| 33281       | CadSNP8876     | <i>Desi</i>      | Ca_Desig_Scaffold00852       | 80758                          | (A/C)       |
| 33282       | CadSNP8877     | <i>Desi</i>      | Ca_Desig_Scaffold00852       | 83921                          | (C/A)       |
| 33283       | CadSNP8878     | <i>Desi</i>      | Ca_Desig_Scaffold00853       | 21869                          | (C/A)       |
| 33284       | CadSNP8879     | <i>Desi</i>      | Ca_Desig_Scaffold00853       | 21891                          | (A/G)       |
| 33285       | CadSNP8880     | <i>Desi</i>      | Ca_Desig_Scaffold00854       | 32748                          | (A/C)       |
| 33286       | CadSNP8881     | <i>Desi</i>      | Ca_Desig_Scaffold00854       | 32759                          | (C/T)       |
| 33287       | CadSNP8882     | <i>Desi</i>      | Ca_Desig_Scaffold00854       | 32840                          | (T/C)       |

| <b>S.N.</b> | <b>SNP IDs</b> | <b>Cultivars</b> | <b>Chromosomes/scaffolds</b> | <b>Physical positions (bp)</b> | <b>SNPs</b> |
|-------------|----------------|------------------|------------------------------|--------------------------------|-------------|
| 33288       | CadSNP8883     | <i>Desi</i>      | Ca_Desig_Scaffold00854       | 32837                          | (A/G)       |
| 33289       | CadSNP8884     | <i>Desi</i>      | Ca_Desig_Scaffold00854       | 32828                          | (A/G)       |
| 33290       | CadSNP8885     | <i>Desi</i>      | Ca_Desig_Scaffold00854       | 32809                          | (G/T)       |
| 33291       | CadSNP8886     | <i>Desi</i>      | Ca_Desig_Scaffold00854       | 32794                          | (C/G)       |
| 33292       | CadSNP8887     | <i>Desi</i>      | Ca_Desig_Scaffold00854       | 59914                          | (A/C)       |
| 33293       | CadSNP8888     | <i>Desi</i>      | Ca_Desig_Scaffold00854       | 64234                          | (T/G)       |
| 33294       | CadSNP8889     | <i>Desi</i>      | Ca_Desig_Scaffold00854       | 64434                          | (G/C)       |
| 33295       | CadSNP8890     | <i>Desi</i>      | Ca_Desig_Scaffold00854       | 77020                          | (T/C)       |
| 33296       | CadSNP8891     | <i>Desi</i>      | Ca_Desig_Scaffold00859       | 11251                          | (A/G)       |
| 33297       | CadSNP8892     | <i>Desi</i>      | Ca_Desig_Scaffold00859       | 11293                          | (A/G)       |
| 33298       | CadSNP8893     | <i>Desi</i>      | Ca_Desig_Scaffold00859       | 34386                          | (A/T)       |
| 33299       | CadSNP8894     | <i>Desi</i>      | Ca_Desig_Scaffold00859       | 34583                          | (T/C)       |
| 33300       | CadSNP8895     | <i>Desi</i>      | Ca_Desig_Scaffold00859       | 72145                          | (T/G)       |
| 33301       | CadSNP8896     | <i>Desi</i>      | Ca_Desig_Scaffold00861       | 76222                          | (G/T)       |
| 33302       | CadSNP8897     | <i>Desi</i>      | Ca_Desig_Scaffold00861       | 76237                          | (C/T)       |
| 33303       | CadSNP8898     | <i>Desi</i>      | Ca_Desig_Scaffold00861       | 76234                          | (A/C)       |
| 33304       | CadSNP8899     | <i>Desi</i>      | Ca_Desig_Scaffold00865       | 157579                         | (T/G)       |
| 33305       | CadSNP8900     | <i>Desi</i>      | Ca_Desig_Scaffold00870       | 29921                          | (C/T)       |
| 33306       | CadSNP8901     | <i>Desi</i>      | Ca_Desig_Scaffold00870       | 89893                          | (A/C)       |
| 33307       | CadSNP8902     | <i>Desi</i>      | Ca_Desig_Scaffold00872       | 14583                          | (A/G)       |
| 33308       | CadSNP8903     | <i>Desi</i>      | Ca_Desig_Scaffold00872       | 14618                          | (C/T)       |
| 33309       | CadSNP8904     | <i>Desi</i>      | Ca_Desig_Scaffold00872       | 14648                          | (A/G)       |
| 33310       | CadSNP8905     | <i>Desi</i>      | Ca_Desig_Scaffold00872       | 14681                          | (T/C)       |
| 33311       | CadSNP8906     | <i>Desi</i>      | Ca_Desig_Scaffold00872       | 14893                          | (A/C)       |
| 33312       | CadSNP8907     | <i>Desi</i>      | Ca_Desig_Scaffold00872       | 44551                          | (C/A)       |
| 33313       | CadSNP8908     | <i>Desi</i>      | Ca_Desig_Scaffold00872       | 44630                          | (T/A)       |
| 33314       | CadSNP8909     | <i>Desi</i>      | Ca_Desig_Scaffold00872       | 86332                          | (C/T)       |
| 33315       | CadSNP8910     | <i>Desi</i>      | Ca_Desig_Scaffold00875       | 28744                          | (G/C)       |
| 33316       | CadSNP8911     | <i>Desi</i>      | Ca_Desig_Scaffold00876       | 92274                          | (C/G)       |
| 33317       | CadSNP8912     | <i>Desi</i>      | Ca_Desig_Scaffold00876       | 93595                          | (A/G)       |
| 33318       | CadSNP8913     | <i>Desi</i>      | Ca_Desig_Scaffold00877       | 114395                         | (T/A)       |
| 33319       | CadSNP8914     | <i>Desi</i>      | Ca_Desig_Scaffold00877       | 115771                         | (C/T)       |
| 33320       | CadSNP8915     | <i>Desi</i>      | Ca_Desig_Scaffold00877       | 212658                         | (A/C)       |
| 33321       | CadSNP8916     | <i>Desi</i>      | Ca_Desig_Scaffold00879       | 25034                          | (T/A)       |
| 33322       | CadSNP8917     | <i>Desi</i>      | Ca_Desig_Scaffold00879       | 54322                          | (A/C)       |
| 33323       | CadSNP8918     | <i>Desi</i>      | Ca_Desig_Scaffold00879       | 54585                          | (T/C)       |
| 33324       | CadSNP8919     | <i>Desi</i>      | Ca_Desig_Scaffold00879       | 55971                          | (C/A)       |
| 33325       | CadSNP8920     | <i>Desi</i>      | Ca_Desig_Scaffold00879       | 55928                          | (A/G)       |

| <b>S.N.</b> | <b>SNP IDs</b> | <b>Cultivars</b> | <b>Chromosomes/scaffolds</b> | <b>Physical positions (bp)</b> | <b>SNPs</b> |
|-------------|----------------|------------------|------------------------------|--------------------------------|-------------|
| 33326       | CadSNP8921     | <i>Desi</i>      | Ca_Desig_Scaffold00879       | 55922                          | (T/G)       |
| 33327       | CadSNP8922     | <i>Desi</i>      | Ca_Desig_Scaffold00879       | 56132                          | (A/C)       |
| 33328       | CadSNP8923     | <i>Desi</i>      | Ca_Desig_Scaffold00881       | 35493                          | (T/G)       |
| 33329       | CadSNP8924     | <i>Desi</i>      | Ca_Desig_Scaffold00881       | 35540                          | (C/A)       |
| 33330       | CadSNP8925     | <i>Desi</i>      | Ca_Desig_Scaffold00881       | 40024                          | (C/A)       |
| 33331       | CadSNP8926     | <i>Desi</i>      | Ca_Desig_Scaffold00881       | 40025                          | (G/A)       |
| 33332       | CadSNP8927     | <i>Desi</i>      | Ca_Desig_Scaffold00881       | 40027                          | (A/C)       |
| 33333       | CadSNP8928     | <i>Desi</i>      | Ca_Desig_Scaffold00883       | 52495                          | (T/G)       |
| 33334       | CadSNP8929     | <i>Desi</i>      | Ca_Desig_Scaffold00883       | 52517                          | (G/A)       |
| 33335       | CadSNP8930     | <i>Desi</i>      | Ca_Desig_Scaffold00883       | 53397                          | (T/G)       |
| 33336       | CadSNP8931     | <i>Desi</i>      | Ca_Desig_Scaffold00885       | 7126                           | (A/T)       |
| 33337       | CadSNP8932     | <i>Desi</i>      | Ca_Desig_Scaffold00885       | 7180                           | (A/G)       |
| 33338       | CadSNP8933     | <i>Desi</i>      | Ca_Desig_Scaffold00885       | 7925                           | (G/A)       |
| 33339       | CadSNP8934     | <i>Desi</i>      | Ca_Desig_Scaffold00885       | 36964                          | (A/G)       |
| 33340       | CadSNP8935     | <i>Desi</i>      | Ca_Desig_Scaffold00885       | 37042                          | (T/C)       |
| 33341       | CadSNP8936     | <i>Desi</i>      | Ca_Desig_Scaffold00885       | 37055                          | (G/C)       |
| 33342       | CadSNP8937     | <i>Desi</i>      | Ca_Desig_Scaffold00885       | 53698                          | (T/G)       |
| 33343       | CadSNP8938     | <i>Desi</i>      | Ca_Desig_Scaffold00885       | 53697                          | (G/T)       |
| 33344       | CadSNP8939     | <i>Desi</i>      | Ca_Desig_Scaffold00885       | 84984                          | (A/G)       |
| 33345       | CadSNP8940     | <i>Desi</i>      | Ca_Desig_Scaffold00885       | 98686                          | (A/G)       |
| 33346       | CadSNP8941     | <i>Desi</i>      | Ca_Desig_Scaffold00885       | 98669                          | (T/C)       |
| 33347       | CadSNP8942     | <i>Desi</i>      | Ca_Desig_Scaffold00893       | 478                            | (T/C)       |
| 33348       | CadSNP8943     | <i>Desi</i>      | Ca_Desig_Scaffold00893       | 32005                          | (T/G)       |
| 33349       | CadSNP8944     | <i>Desi</i>      | Ca_Desig_Scaffold00893       | 50541                          | (C/A)       |
| 33350       | CadSNP8945     | <i>Desi</i>      | Ca_Desig_Scaffold00893       | 64832                          | (C/T)       |
| 33351       | CadSNP8946     | <i>Desi</i>      | Ca_Desig_Scaffold00893       | 79725                          | (T/C)       |
| 33352       | CadSNP8947     | <i>Desi</i>      | Ca_Desig_Scaffold00897       | 37672                          | (T/C)       |
| 33353       | CadSNP8948     | <i>Desi</i>      | Ca_Desig_Scaffold00897       | 37719                          | (C/T)       |
| 33354       | CadSNP8949     | <i>Desi</i>      | Ca_Desig_Scaffold00897       | 38164                          | (T/G)       |
| 33355       | CadSNP8950     | <i>Desi</i>      | Ca_Desig_Scaffold00897       | 38237                          | (C/A)       |
| 33356       | CadSNP8951     | <i>Desi</i>      | Ca_Desig_Scaffold00897       | 95906                          | (G/A)       |
| 33357       | CadSNP8952     | <i>Desi</i>      | Ca_Desig_Scaffold00897       | 95933                          | (G/A)       |
| 33358       | CadSNP8953     | <i>Desi</i>      | Ca_Desig_Scaffold00897       | 95969                          | (G/A)       |
| 33359       | CadSNP8954     | <i>Desi</i>      | Ca_Desig_Scaffold00897       | 96041                          | (T/G)       |
| 33360       | CadSNP8955     | <i>Desi</i>      | Ca_Desig_Scaffold00898       | 106083                         | (C/T)       |
| 33361       | CadSNP8956     | <i>Desi</i>      | Ca_Desig_Scaffold00899       | 60593                          | (A/C)       |
| 33362       | CadSNP8957     | <i>Desi</i>      | Ca_Desig_Scaffold00899       | 60789                          | (C/T)       |
| 33363       | CadSNP8958     | <i>Desi</i>      | Ca_Desig_Scaffold00899       | 63307                          | (A/T)       |



| <b>S.N.</b> | <b>SNP IDs</b> | <b>Cultivars</b> | <b>Chromosomes/scaffolds</b> | <b>Physical positions (bp)</b> | <b>SNPs</b> |
|-------------|----------------|------------------|------------------------------|--------------------------------|-------------|
| 33364       | CadSNP8959     | <i>Desi</i>      | Ca_Desig_Scaffold00899       | 63554                          | (A/G)       |
| 33365       | CadSNP8960     | <i>Desi</i>      | Ca_Desig_Scaffold00899       | 64433                          | (A/T)       |
| 33366       | CadSNP8961     | <i>Desi</i>      | Ca_Desig_Scaffold00900       | 17576                          | (A/T)       |
| 33367       | CadSNP8962     | <i>Desi</i>      | Ca_Desig_Scaffold00900       | 26260                          | (A/C)       |
| 33368       | CadSNP8963     | <i>Desi</i>      | Ca_Desig_Scaffold00902       | 18429                          | (A/T)       |
| 33369       | CadSNP8964     | <i>Desi</i>      | Ca_Desig_Scaffold00902       | 105669                         | (C/A)       |
| 33370       | CadSNP8965     | <i>Desi</i>      | Ca_Desig_Scaffold00902       | 105600                         | (A/G)       |
| 33371       | CadSNP8966     | <i>Desi</i>      | Ca_Desig_Scaffold00903       | 78195                          | (G/T)       |
| 33372       | CadSNP8967     | <i>Desi</i>      | Ca_Desig_Scaffold00903       | 84082                          | (T/C)       |
| 33373       | CadSNP8968     | <i>Desi</i>      | Ca_Desig_Scaffold00903       | 84202                          | (T/C)       |
| 33374       | CadSNP8969     | <i>Desi</i>      | Ca_Desig_Scaffold00906       | 26212                          | (C/T)       |
| 33375       | CadSNP8970     | <i>Desi</i>      | Ca_Desig_Scaffold00906       | 86997                          | (G/A)       |
| 33376       | CadSNP8971     | <i>Desi</i>      | Ca_Desig_Scaffold00906       | 87031                          | (A/T)       |
| 33377       | CadSNP8972     | <i>Desi</i>      | Ca_Desig_Scaffold00906       | 87099                          | (G/C)       |
| 33378       | CadSNP8973     | <i>Desi</i>      | Ca_Desig_Scaffold00906       | 88870                          | (T/C)       |
| 33379       | CadSNP8974     | <i>Desi</i>      | Ca_Desig_Scaffold00906       | 91967                          | (C/A)       |
| 33380       | CadSNP8975     | <i>Desi</i>      | Ca_Desig_Scaffold00906       | 92014                          | (G/A)       |
| 33381       | CadSNP8976     | <i>Desi</i>      | Ca_Desig_Scaffold00906       | 92027                          | (A/C)       |
| 33382       | CadSNP8977     | <i>Desi</i>      | Ca_Desig_Scaffold00906       | 98214                          | (C/T)       |
| 33383       | CadSNP8978     | <i>Desi</i>      | Ca_Desig_Scaffold00906       | 98216                          | (G/A)       |
| 33384       | CadSNP8979     | <i>Desi</i>      | Ca_Desig_Scaffold00906       | 98443                          | (T/C)       |
| 33385       | CadSNP8980     | <i>Desi</i>      | Ca_Desig_Scaffold00906       | 98420                          | (C/T)       |
| 33386       | CadSNP8981     | <i>Desi</i>      | Ca_Desig_Scaffold00906       | 98372                          | (T/C)       |
| 33387       | CadSNP8982     | <i>Desi</i>      | Ca_Desig_Scaffold00907       | 16679                          | (A/G)       |
| 33388       | CadSNP8983     | <i>Desi</i>      | Ca_Desig_Scaffold00907       | 124746                         | (T/A)       |
| 33389       | CadSNP8984     | <i>Desi</i>      | Ca_Desig_Scaffold00907       | 205802                         | (A/C)       |
| 33390       | CadSNP8985     | <i>Desi</i>      | Ca_Desig_Scaffold00908       | 12759                          | (C/G)       |
| 33391       | CadSNP8986     | <i>Desi</i>      | Ca_Desig_Scaffold00908       | 15897                          | (G/A)       |
| 33392       | CadSNP8987     | <i>Desi</i>      | Ca_Desig_Scaffold00908       | 15880                          | (A/C)       |
| 33393       | CadSNP8988     | <i>Desi</i>      | Ca_Desig_Scaffold00908       | 218675                         | (G/A)       |
| 33394       | CadSNP8989     | <i>Desi</i>      | Ca_Desig_Scaffold00908       | 218629                         | (G/A)       |
| 33395       | CadSNP8990     | <i>Desi</i>      | Ca_Desig_Scaffold00912       | 82555                          | (C/A)       |
| 33396       | CadSNP8991     | <i>Desi</i>      | Ca_Desig_Scaffold00912       | 101079                         | (A/T)       |
| 33397       | CadSNP8992     | <i>Desi</i>      | Ca_Desig_Scaffold00912       | 158759                         | (G/C)       |
| 33398       | CadSNP8993     | <i>Desi</i>      | Ca_Desig_Scaffold00912       | 158856                         | (C/T)       |
| 33399       | CadSNP8994     | <i>Desi</i>      | Ca_Desig_Scaffold00916       | 15580                          | (C/G)       |
| 33400       | CadSNP8995     | <i>Desi</i>      | Ca_Desig_Scaffold00916       | 15697                          | (C/G)       |
| 33401       | CadSNP8996     | <i>Desi</i>      | Ca_Desig_Scaffold00916       | 16238                          | (C/T)       |

| <b>S.N.</b> | <b>SNP IDs</b> | <b>Cultivars</b> | <b>Chromosomes/scaffolds</b> | <b>Physical positions (bp)</b> | <b>SNPs</b> |
|-------------|----------------|------------------|------------------------------|--------------------------------|-------------|
| 33402       | CadSNP8997     | <i>Desi</i>      | Ca_Desig_Scaffold00916       | 16392                          | (C/T)       |
| 33403       | CadSNP8998     | <i>Desi</i>      | Ca_Desig_Scaffold00916       | 17523                          | (G/T)       |
| 33404       | CadSNP8999     | <i>Desi</i>      | Ca_Desig_Scaffold00916       | 24429                          | (A/G)       |
| 33405       | CadSNP9000     | <i>Desi</i>      | Ca_Desig_Scaffold00916       | 24459                          | (G/T)       |
| 33406       | CadSNP9001     | <i>Desi</i>      | Ca_Desig_Scaffold00917       | 66262                          | (C/T)       |
| 33407       | CadSNP9002     | <i>Desi</i>      | Ca_Desig_Scaffold00917       | 66261                          | (T/C)       |
| 33408       | CadSNP9003     | <i>Desi</i>      | Ca_Desig_Scaffold00919       | 53262                          | (C/T)       |
| 33409       | CadSNP9004     | <i>Desi</i>      | Ca_Desig_Scaffold00922       | 5408                           | (C/A)       |
| 33410       | CadSNP9005     | <i>Desi</i>      | Ca_Desig_Scaffold00922       | 5409                           | (T/C)       |
| 33411       | CadSNP9006     | <i>Desi</i>      | Ca_Desig_Scaffold00922       | 5410                           | (G/C)       |
| 33412       | CadSNP9007     | <i>Desi</i>      | Ca_Desig_Scaffold00922       | 9662                           | (G/A)       |
| 33413       | CadSNP9008     | <i>Desi</i>      | Ca_Desig_Scaffold00922       | 82183                          | (T/G)       |
| 33414       | CadSNP9009     | <i>Desi</i>      | Ca_Desig_Scaffold00922       | 82209                          | (T/G)       |
| 33415       | CadSNP9010     | <i>Desi</i>      | Ca_Desig_Scaffold00923       | 44581                          | (C/A)       |
| 33416       | CadSNP9011     | <i>Desi</i>      | Ca_Desig_Scaffold00924       | 51231                          | (C/G)       |
| 33417       | CadSNP9012     | <i>Desi</i>      | Ca_Desig_Scaffold00924       | 85877                          | (C/T)       |
| 33418       | CadSNP9013     | <i>Desi</i>      | Ca_Desig_Scaffold00924       | 85867                          | (A/C)       |
| 33419       | CadSNP9014     | <i>Desi</i>      | Ca_Desig_Scaffold00924       | 85859                          | (A/C)       |
| 33420       | CadSNP9015     | <i>Desi</i>      | Ca_Desig_Scaffold00924       | 86093                          | (A/C)       |
| 33421       | CadSNP9016     | <i>Desi</i>      | Ca_Desig_Scaffold00925       | 3693                           | (C/T)       |
| 33422       | CadSNP9017     | <i>Desi</i>      | Ca_Desig_Scaffold00925       | 3707                           | (C/G)       |
| 33423       | CadSNP9018     | <i>Desi</i>      | Ca_Desig_Scaffold00925       | 69325                          | (T/C)       |
| 33424       | CadSNP9019     | <i>Desi</i>      | Ca_Desig_Scaffold00925       | 69313                          | (T/C)       |
| 33425       | CadSNP9020     | <i>Desi</i>      | Ca_Desig_Scaffold00927       | 11010                          | (C/A)       |
| 33426       | CadSNP9021     | <i>Desi</i>      | Ca_Desig_Scaffold00927       | 11432                          | (T/G)       |
| 33427       | CadSNP9022     | <i>Desi</i>      | Ca_Desig_Scaffold00927       | 11403                          | (T/C)       |
| 33428       | CadSNP9023     | <i>Desi</i>      | Ca_Desig_Scaffold00927       | 11390                          | (T/G)       |
| 33429       | CadSNP9024     | <i>Desi</i>      | Ca_Desig_Scaffold00927       | 11386                          | (G/C)       |
| 33430       | CadSNP9025     | <i>Desi</i>      | Ca_Desig_Scaffold00927       | 11385                          | (T/G)       |
| 33431       | CadSNP9026     | <i>Desi</i>      | Ca_Desig_Scaffold00927       | 12648                          | (G/A)       |
| 33432       | CadSNP9027     | <i>Desi</i>      | Ca_Desig_Scaffold00927       | 74261                          | (C/T)       |
| 33433       | CadSNP9028     | <i>Desi</i>      | Ca_Desig_Scaffold00930       | 26471                          | (A/G)       |
| 33434       | CadSNP9029     | <i>Desi</i>      | Ca_Desig_Scaffold00930       | 26584                          | (T/C)       |
| 33435       | CadSNP9030     | <i>Desi</i>      | Ca_Desig_Scaffold00930       | 27063                          | (A/T)       |
| 33436       | CadSNP9031     | <i>Desi</i>      | Ca_Desig_Scaffold00930       | 27048                          | (T/C)       |
| 33437       | CadSNP9032     | <i>Desi</i>      | Ca_Desig_Scaffold00930       | 27089                          | (T/C)       |
| 33438       | CadSNP9033     | <i>Desi</i>      | Ca_Desig_Scaffold00930       | 27132                          | (T/C)       |
| 33439       | CadSNP9034     | <i>Desi</i>      | Ca_Desig_Scaffold00930       | 27172                          | (G/A)       |

| <b>S.N.</b> | <b>SNP IDs</b> | <b>Cultivars</b> | <b>Chromosomes/scaffolds</b> | <b>Physical positions (bp)</b> | <b>SNPs</b> |
|-------------|----------------|------------------|------------------------------|--------------------------------|-------------|
| 33440       | CadSNP9035     | <i>Desi</i>      | Ca_Desig_Scaffold00930       | 28401                          | (C/G)       |
| 33441       | CadSNP9036     | <i>Desi</i>      | Ca_Desig_Scaffold00930       | 28402                          | (A/G)       |
| 33442       | CadSNP9037     | <i>Desi</i>      | Ca_Desig_Scaffold00930       | 28426                          | (T/A)       |
| 33443       | CadSNP9038     | <i>Desi</i>      | Ca_Desig_Scaffold00930       | 28419                          | (A/G)       |
| 33444       | CadSNP9039     | <i>Desi</i>      | Ca_Desig_Scaffold00930       | 28524                          | (C/T)       |
| 33445       | CadSNP9040     | <i>Desi</i>      | Ca_Desig_Scaffold00930       | 91514                          | (C/T)       |
| 33446       | CadSNP9041     | <i>Desi</i>      | Ca_Desig_Scaffold00930       | 91549                          | (C/T)       |
| 33447       | CadSNP9042     | <i>Desi</i>      | Ca_Desig_Scaffold00930       | 91560                          | (G/A)       |
| 33448       | CadSNP9043     | <i>Desi</i>      | Ca_Desig_Scaffold00933       | 14119                          | (C/T)       |
| 33449       | CadSNP9044     | <i>Desi</i>      | Ca_Desig_Scaffold00933       | 44335                          | (A/G)       |
| 33450       | CadSNP9045     | <i>Desi</i>      | Ca_Desig_Scaffold00933       | 62235                          | (A/G)       |
| 33451       | CadSNP9046     | <i>Desi</i>      | Ca_Desig_Scaffold00933       | 62323                          | (G/T)       |
| 33452       | CadSNP9047     | <i>Desi</i>      | Ca_Desig_Scaffold00933       | 75363                          | (A/T)       |
| 33453       | CadSNP9048     | <i>Desi</i>      | Ca_Desig_Scaffold00934       | 124423                         | (A/G)       |
| 33454       | CadSNP9049     | <i>Desi</i>      | Ca_Desig_Scaffold00934       | 148869                         | (G/T)       |
| 33455       | CadSNP9050     | <i>Desi</i>      | Ca_Desig_Scaffold00934       | 266324                         | (C/T)       |
| 33456       | CadSNP9051     | <i>Desi</i>      | Ca_Desig_Scaffold00934       | 309283                         | (G/A)       |
| 33457       | CadSNP9052     | <i>Desi</i>      | Ca_Desig_Scaffold00935       | 16914                          | (G/A)       |
| 33458       | CadSNP9053     | <i>Desi</i>      | Ca_Desig_Scaffold00935       | 33422                          | (T/G)       |
| 33459       | CadSNP9054     | <i>Desi</i>      | Ca_Desig_Scaffold00935       | 33598                          | (G/A)       |
| 33460       | CadSNP9055     | <i>Desi</i>      | Ca_Desig_Scaffold00935       | 34654                          | (T/C)       |
| 33461       | CadSNP9056     | <i>Desi</i>      | Ca_Desig_Scaffold00936       | 54679                          | (G/A)       |
| 33462       | CadSNP9057     | <i>Desi</i>      | Ca_Desig_Scaffold00936       | 85038                          | (A/G)       |
| 33463       | CadSNP9058     | <i>Desi</i>      | Ca_Desig_Scaffold00937       | 69743                          | (A/G)       |
| 33464       | CadSNP9059     | <i>Desi</i>      | Ca_Desig_Scaffold00937       | 69789                          | (C/T)       |
| 33465       | CadSNP9060     | <i>Desi</i>      | Ca_Desig_Scaffold00938       | 57490                          | (A/C)       |
| 33466       | CadSNP9061     | <i>Desi</i>      | Ca_Desig_Scaffold00938       | 89315                          | (A/G)       |
| 33467       | CadSNP9062     | <i>Desi</i>      | Ca_Desig_Scaffold00938       | 89643                          | (G/A)       |
| 33468       | CadSNP9063     | <i>Desi</i>      | Ca_Desig_Scaffold00938       | 89664                          | (T/C)       |
| 33469       | CadSNP9064     | <i>Desi</i>      | Ca_Desig_Scaffold00938       | 89667                          | (T/G)       |
| 33470       | CadSNP9065     | <i>Desi</i>      | Ca_Desig_Scaffold00938       | 89682                          | (G/A)       |
| 33471       | CadSNP9066     | <i>Desi</i>      | Ca_Desig_Scaffold00938       | 89685                          | (T/C)       |
| 33472       | CadSNP9067     | <i>Desi</i>      | Ca_Desig_Scaffold00938       | 89691                          | (A/G)       |
| 33473       | CadSNP9068     | <i>Desi</i>      | Ca_Desig_Scaffold00938       | 89701                          | (G/A)       |
| 33474       | CadSNP9069     | <i>Desi</i>      | Ca_Desig_Scaffold00938       | 89801                          | (G/A)       |
| 33475       | CadSNP9070     | <i>Desi</i>      | Ca_Desig_Scaffold00938       | 89766                          | (G/A)       |
| 33476       | CadSNP9071     | <i>Desi</i>      | Ca_Desig_Scaffold00940       | 4875                           | (A/C)       |
| 33477       | CadSNP9072     | <i>Desi</i>      | Ca_Desig_Scaffold00940       | 7087                           | (G/T)       |

| <b>S.N.</b> | <b>SNP IDs</b> | <b>Cultivars</b> | <b>Chromosomes/scaffolds</b> | <b>Physical positions (bp)</b> | <b>SNPs</b> |
|-------------|----------------|------------------|------------------------------|--------------------------------|-------------|
| 33478       | CadSNP9073     | <i>Desi</i>      | Ca_Desig_Scaffold00940       | 7400                           | (C/T)       |
| 33479       | CadSNP9074     | <i>Desi</i>      | Ca_Desig_Scaffold00940       | 13449                          | (T/A)       |
| 33480       | CadSNP9075     | <i>Desi</i>      | Ca_Desig_Scaffold00940       | 13459                          | (T/A)       |
| 33481       | CadSNP9076     | <i>Desi</i>      | Ca_Desig_Scaffold00940       | 13461                          | (A/T)       |
| 33482       | CadSNP9077     | <i>Desi</i>      | Ca_Desig_Scaffold00940       | 13473                          | (C/A)       |
| 33483       | CadSNP9078     | <i>Desi</i>      | Ca_Desig_Scaffold00940       | 27880                          | (G/A)       |
| 33484       | CadSNP9079     | <i>Desi</i>      | Ca_Desig_Scaffold00940       | 27874                          | (A/C)       |
| 33485       | CadSNP9080     | <i>Desi</i>      | Ca_Desig_Scaffold00940       | 34284                          | (C/T)       |
| 33486       | CadSNP9081     | <i>Desi</i>      | Ca_Desig_Scaffold00940       | 34369                          | (A/G)       |
| 33487       | CadSNP9082     | <i>Desi</i>      | Ca_Desig_Scaffold00940       | 73123                          | (G/T)       |
| 33488       | CadSNP9083     | <i>Desi</i>      | Ca_Desig_Scaffold00941       | 24094                          | (G/A)       |
| 33489       | CadSNP9084     | <i>Desi</i>      | Ca_Desig_Scaffold00941       | 34646                          | (C/T)       |
| 33490       | CadSNP9085     | <i>Desi</i>      | Ca_Desig_Scaffold00941       | 34658                          | (C/T)       |
| 33491       | CadSNP9086     | <i>Desi</i>      | Ca_Desig_Scaffold00941       | 34720                          | (C/A)       |
| 33492       | CadSNP9087     | <i>Desi</i>      | Ca_Desig_Scaffold00942       | 88710                          | (T/G)       |
| 33493       | CadSNP9088     | <i>Desi</i>      | Ca_Desig_Scaffold00942       | 89490                          | (A/G)       |
| 33494       | CadSNP9089     | <i>Desi</i>      | Ca_Desig_Scaffold00943       | 35515                          | (T/G)       |
| 33495       | CadSNP9090     | <i>Desi</i>      | Ca_Desig_Scaffold00943       | 35514                          | (C/T)       |
| 33496       | CadSNP9091     | <i>Desi</i>      | Ca_Desig_Scaffold00943       | 37176                          | (G/T)       |
| 33497       | CadSNP9092     | <i>Desi</i>      | Ca_Desig_Scaffold00943       | 37269                          | (C/T)       |
| 33498       | CadSNP9093     | <i>Desi</i>      | Ca_Desig_Scaffold00943       | 93778                          | (T/C)       |
| 33499       | CadSNP9094     | <i>Desi</i>      | Ca_Desig_Scaffold00943       | 97452                          | (G/C)       |
| 33500       | CadSNP9095     | <i>Desi</i>      | Ca_Desig_Scaffold00943       | 102821                         | (A/G)       |
| 33501       | CadSNP9096     | <i>Desi</i>      | Ca_Desig_Scaffold00946       | 44834                          | (A/C)       |
| 33502       | CadSNP9097     | <i>Desi</i>      | Ca_Desig_Scaffold00946       | 44832                          | (T/C)       |
| 33503       | CadSNP9098     | <i>Desi</i>      | Ca_Desig_Scaffold00946       | 44816                          | (C/A)       |
| 33504       | CadSNP9099     | <i>Desi</i>      | Ca_Desig_Scaffold00946       | 44902                          | (A/G)       |
| 33505       | CadSNP9100     | <i>Desi</i>      | Ca_Desig_Scaffold00946       | 44876                          | (T/C)       |
| 33506       | CadSNP9101     | <i>Desi</i>      | Ca_Desig_Scaffold00946       | 44874                          | (C/T)       |
| 33507       | CadSNP9102     | <i>Desi</i>      | Ca_Desig_Scaffold00946       | 47526                          | (A/C)       |
| 33508       | CadSNP9103     | <i>Desi</i>      | Ca_Desig_Scaffold00946       | 47552                          | (G/T)       |
| 33509       | CadSNP9104     | <i>Desi</i>      | Ca_Desig_Scaffold00946       | 47651                          | (G/A)       |
| 33510       | CadSNP9105     | <i>Desi</i>      | Ca_Desig_Scaffold00946       | 47636                          | (A/G)       |
| 33511       | CadSNP9106     | <i>Desi</i>      | Ca_Desig_Scaffold00946       | 68313                          | (G/A)       |
| 33512       | CadSNP9107     | <i>Desi</i>      | Ca_Desig_Scaffold00946       | 88091                          | (C/T)       |
| 33513       | CadSNP9108     | <i>Desi</i>      | Ca_Desig_Scaffold00952       | 69679                          | (G/A)       |
| 33514       | CadSNP9109     | <i>Desi</i>      | Ca_Desig_Scaffold00953       | 7776                           | (G/C)       |
| 33515       | CadSNP9110     | <i>Desi</i>      | Ca_Desig_Scaffold00953       | 7771                           | (T/C)       |

| <b>S.N.</b> | <b>SNP IDs</b> | <b>Cultivars</b> | <b>Chromosomes/scaffolds</b> | <b>Physical positions (bp)</b> | <b>SNPs</b> |
|-------------|----------------|------------------|------------------------------|--------------------------------|-------------|
| 33516       | CadSNP9111     | <i>Desi</i>      | Ca_Desig_Scaffold00953       | 7974                           | (C/A)       |
| 33517       | CadSNP9112     | <i>Desi</i>      | Ca_Desig_Scaffold00953       | 10407                          | (G/A)       |
| 33518       | CadSNP9113     | <i>Desi</i>      | Ca_Desig_Scaffold00953       | 13565                          | (A/G)       |
| 33519       | CadSNP9114     | <i>Desi</i>      | Ca_Desig_Scaffold00953       | 13589                          | (G/T)       |
| 33520       | CadSNP9115     | <i>Desi</i>      | Ca_Desig_Scaffold00953       | 13594                          | (A/C)       |
| 33521       | CadSNP9116     | <i>Desi</i>      | Ca_Desig_Scaffold00953       | 14109                          | (G/C)       |
| 33522       | CadSNP9117     | <i>Desi</i>      | Ca_Desig_Scaffold00953       | 14086                          | (T/C)       |
| 33523       | CadSNP9118     | <i>Desi</i>      | Ca_Desig_Scaffold00953       | 14085                          | (A/G)       |
| 33524       | CadSNP9119     | <i>Desi</i>      | Ca_Desig_Scaffold00953       | 60404                          | (G/A)       |
| 33525       | CadSNP9120     | <i>Desi</i>      | Ca_Desig_Scaffold00953       | 60620                          | (A/C)       |
| 33526       | CadSNP9121     | <i>Desi</i>      | Ca_Desig_Scaffold00953       | 75396                          | (T/G)       |
| 33527       | CadSNP9122     | <i>Desi</i>      | Ca_Desig_Scaffold00953       | 85146                          | (G/A)       |
| 33528       | CadSNP9123     | <i>Desi</i>      | Ca_Desig_Scaffold00953       | 85147                          | (T/C)       |
| 33529       | CadSNP9124     | <i>Desi</i>      | Ca_Desig_Scaffold00955       | 17514                          | (C/T)       |
| 33530       | CadSNP9125     | <i>Desi</i>      | Ca_Desig_Scaffold00955       | 62227                          | (T/C)       |
| 33531       | CadSNP9126     | <i>Desi</i>      | Ca_Desig_Scaffold00955       | 62239                          | (G/A)       |
| 33532       | CadSNP9127     | <i>Desi</i>      | Ca_Desig_Scaffold00955       | 64098                          | (C/T)       |
| 33533       | CadSNP9128     | <i>Desi</i>      | Ca_Desig_Scaffold00955       | 64255                          | (C/T)       |
| 33534       | CadSNP9129     | <i>Desi</i>      | Ca_Desig_Scaffold00955       | 64438                          | (C/T)       |
| 33535       | CadSNP9130     | <i>Desi</i>      | Ca_Desig_Scaffold00955       | 66131                          | (G/A)       |
| 33536       | CadSNP9131     | <i>Desi</i>      | Ca_Desig_Scaffold00955       | 76441                          | (C/G)       |
| 33537       | CadSNP9132     | <i>Desi</i>      | Ca_Desig_Scaffold00964       | 83082                          | (A/G)       |
| 33538       | CadSNP9133     | <i>Desi</i>      | Ca_Desig_Scaffold00965       | 8997                           | (C/A)       |
| 33539       | CadSNP9134     | <i>Desi</i>      | Ca_Desig_Scaffold00965       | 8998                           | (A/G)       |
| 33540       | CadSNP9135     | <i>Desi</i>      | Ca_Desig_Scaffold00965       | 35527                          | (T/A)       |
| 33541       | CadSNP9136     | <i>Desi</i>      | Ca_Desig_Scaffold00965       | 35614                          | (C/T)       |
| 33542       | CadSNP9137     | <i>Desi</i>      | Ca_Desig_Scaffold00965       | 35612                          | (C/T)       |
| 33543       | CadSNP9138     | <i>Desi</i>      | Ca_Desig_Scaffold00965       | 35568                          | (G/A)       |
| 33544       | CadSNP9139     | <i>Desi</i>      | Ca_Desig_Scaffold00965       | 49484                          | (A/G)       |
| 33545       | CadSNP9140     | <i>Desi</i>      | Ca_Desig_Scaffold00965       | 81962                          | (G/A)       |
| 33546       | CadSNP9141     | <i>Desi</i>      | Ca_Desig_Scaffold00965       | 82302                          | (C/T)       |
| 33547       | CadSNP9142     | <i>Desi</i>      | Ca_Desig_Scaffold00965       | 82304                          | (G/T)       |
| 33548       | CadSNP9143     | <i>Desi</i>      | Ca_Desig_Scaffold00965       | 94199                          | (G/A)       |
| 33549       | CadSNP9144     | <i>Desi</i>      | Ca_Desig_Scaffold00965       | 94233                          | (A/G)       |
| 33550       | CadSNP9145     | <i>Desi</i>      | Ca_Desig_Scaffold00965       | 100824                         | (G/T)       |
| 33551       | CadSNP9146     | <i>Desi</i>      | Ca_Desig_Scaffold00966       | 19942                          | (G/A)       |
| 33552       | CadSNP9147     | <i>Desi</i>      | Ca_Desig_Scaffold00966       | 20050                          | (C/T)       |
| 33553       | CadSNP9148     | <i>Desi</i>      | Ca_Desig_Scaffold00966       | 20046                          | (A/G)       |

| <b>S.N.</b> | <b>SNP IDs</b> | <b>Cultivars</b> | <b>Chromosomes/scaffolds</b> | <b>Physical positions (bp)</b> | <b>SNPs</b> |
|-------------|----------------|------------------|------------------------------|--------------------------------|-------------|
| 33554       | CadSNP9149     | <i>Desi</i>      | Ca_Desig_Scaffold00966       | 21747                          | (G/A)       |
| 33555       | CadSNP9150     | <i>Desi</i>      | Ca_Desig_Scaffold00966       | 21783                          | (T/G)       |
| 33556       | CadSNP9151     | <i>Desi</i>      | Ca_Desig_Scaffold00966       | 21941                          | (G/A)       |
| 33557       | CadSNP9152     | <i>Desi</i>      | Ca_Desig_Scaffold00968       | 37661                          | (C/A)       |
| 33558       | CadSNP9153     | <i>Desi</i>      | Ca_Desig_Scaffold00968       | 37651                          | (C/A)       |
| 33559       | CadSNP9154     | <i>Desi</i>      | Ca_Desig_Scaffold00970       | 32612                          | (T/A)       |
| 33560       | CadSNP9155     | <i>Desi</i>      | Ca_Desig_Scaffold00972       | 77663                          | (G/A)       |
| 33561       | CadSNP9156     | <i>Desi</i>      | Ca_Desig_Scaffold00972       | 77664                          | (T/G)       |
| 33562       | CadSNP9157     | <i>Desi</i>      | Ca_Desig_Scaffold00972       | 77669                          | (G/T)       |
| 33563       | CadSNP9158     | <i>Desi</i>      | Ca_Desig_Scaffold00977       | 13310                          | (A/G)       |
| 33564       | CadSNP9159     | <i>Desi</i>      | Ca_Desig_Scaffold00977       | 13272                          | (T/C)       |
| 33565       | CadSNP9160     | <i>Desi</i>      | Ca_Desig_Scaffold00977       | 150897                         | (T/A)       |
| 33566       | CadSNP9161     | <i>Desi</i>      | Ca_Desig_Scaffold00977       | 150894                         | (T/C)       |
| 33567       | CadSNP9162     | <i>Desi</i>      | Ca_Desig_Scaffold00977       | 153889                         | (A/G)       |
| 33568       | CadSNP9163     | <i>Desi</i>      | Ca_Desig_Scaffold00977       | 170116                         | (A/G)       |
| 33569       | CadSNP9164     | <i>Desi</i>      | Ca_Desig_Scaffold00977       | 243538                         | (C/T)       |
| 33570       | CadSNP9165     | <i>Desi</i>      | Ca_Desig_Scaffold00977       | 259658                         | (A/C)       |
| 33571       | CadSNP9166     | <i>Desi</i>      | Ca_Desig_Scaffold00977       | 275400                         | (T/A)       |
| 33572       | CadSNP9167     | <i>Desi</i>      | Ca_Desig_Scaffold00978       | 29178                          | (A/G)       |
| 33573       | CadSNP9168     | <i>Desi</i>      | Ca_Desig_Scaffold00978       | 29348                          | (A/T)       |
| 33574       | CadSNP9169     | <i>Desi</i>      | Ca_Desig_Scaffold00978       | 29371                          | (C/T)       |
| 33575       | CadSNP9170     | <i>Desi</i>      | Ca_Desig_Scaffold00978       | 78188                          | (G/C)       |
| 33576       | CadSNP9171     | <i>Desi</i>      | Ca_Desig_Scaffold00978       | 82113                          | (A/G)       |
| 33577       | CadSNP9172     | <i>Desi</i>      | Ca_Desig_Scaffold00978       | 82678                          | (T/C)       |
| 33578       | CadSNP9173     | <i>Desi</i>      | Ca_Desig_Scaffold00978       | 88039                          | (A/G)       |
| 33579       | CadSNP9174     | <i>Desi</i>      | Ca_Desig_Scaffold00979       | 59132                          | (G/A)       |
| 33580       | CadSNP9175     | <i>Desi</i>      | Ca_Desig_Scaffold00981       | 33974                          | (C/T)       |
| 33581       | CadSNP9176     | <i>Desi</i>      | Ca_Desig_Scaffold00981       | 80507                          | (T/C)       |
| 33582       | CadSNP9177     | <i>Desi</i>      | Ca_Desig_Scaffold00981       | 88415                          | (G/T)       |
| 33583       | CadSNP9178     | <i>Desi</i>      | Ca_Desig_Scaffold00982       | 87657                          | (C/T)       |
| 33584       | CadSNP9179     | <i>Desi</i>      | Ca_Desig_Scaffold00982       | 91004                          | (A/G)       |
| 33585       | CadSNP9180     | <i>Desi</i>      | Ca_Desig_Scaffold00982       | 93024                          | (A/G)       |
| 33586       | CadSNP9181     | <i>Desi</i>      | Ca_Desig_Scaffold00984       | 45120                          | (T/A)       |
| 33587       | CadSNP9182     | <i>Desi</i>      | Ca_Desig_Scaffold00984       | 48288                          | (G/A)       |
| 33588       | CadSNP9183     | <i>Desi</i>      | Ca_Desig_Scaffold00984       | 48267                          | (C/G)       |
| 33589       | CadSNP9184     | <i>Desi</i>      | Ca_Desig_Scaffold00984       | 48266                          | (T/C)       |
| 33590       | CadSNP9185     | <i>Desi</i>      | Ca_Desig_Scaffold00988       | 66198                          | (G/A)       |
| 33591       | CadSNP9186     | <i>Desi</i>      | Ca_Desig_Scaffold00988       | 66887                          | (C/A)       |

| <b>S.N.</b> | <b>SNP IDs</b> | <b>Cultivars</b> | <b>Chromosomes/scaffolds</b> | <b>Physical positions (bp)</b> | <b>SNPs</b> |
|-------------|----------------|------------------|------------------------------|--------------------------------|-------------|
| 33592       | CadSNP9187     | <i>Desi</i>      | Ca_Desig_Scaffold00988       | 66947                          | (A/G)       |
| 33593       | CadSNP9188     | <i>Desi</i>      | Ca_Desig_Scaffold00988       | 76627                          | (A/G)       |
| 33594       | CadSNP9189     | <i>Desi</i>      | Ca_Desig_Scaffold00988       | 77530                          | (T/A)       |
| 33595       | CadSNP9190     | <i>Desi</i>      | Ca_Desig_Scaffold00988       | 79335                          | (G/A)       |
| 33596       | CadSNP9191     | <i>Desi</i>      | Ca_Desig_Scaffold00988       | 90946                          | (A/C)       |
| 33597       | CadSNP9192     | <i>Desi</i>      | Ca_Desig_Scaffold00991       | 8860                           | (G/A)       |
| 33598       | CadSNP9193     | <i>Desi</i>      | Ca_Desig_Scaffold00991       | 58999                          | (G/A)       |
| 33599       | CadSNP9194     | <i>Desi</i>      | Ca_Desig_Scaffold00991       | 77662                          | (C/T)       |
| 33600       | CadSNP9195     | <i>Desi</i>      | Ca_Desig_Scaffold00991       | 77697                          | (A/C)       |
| 33601       | CadSNP9196     | <i>Desi</i>      | Ca_Desig_Scaffold00991       | 77698                          | (G/A)       |
| 33602       | CadSNP9197     | <i>Desi</i>      | Ca_Desig_Scaffold00991       | 91564                          | (A/C)       |
| 33603       | CadSNP9198     | <i>Desi</i>      | Ca_Desig_Scaffold00991       | 91582                          | (A/G)       |
| 33604       | CadSNP9199     | <i>Desi</i>      | Ca_Desig_Scaffold00991       | 115265                         | (T/C)       |
| 33605       | CadSNP9200     | <i>Desi</i>      | Ca_Desig_Scaffold00991       | 115253                         | (A/T)       |
| 33606       | CadSNP9201     | <i>Desi</i>      | Ca_Desig_Scaffold00991       | 115504                         | (G/A)       |
| 33607       | CadSNP9202     | <i>Desi</i>      | Ca_Desig_Scaffold00991       | 118632                         | (C/T)       |
| 33608       | CadSNP9203     | <i>Desi</i>      | Ca_Desig_Scaffold00991       | 124725                         | (C/T)       |
| 33609       | CadSNP9204     | <i>Desi</i>      | Ca_Desig_Scaffold00991       | 124726                         | (G/T)       |
| 33610       | CadSNP9205     | <i>Desi</i>      | Ca_Desig_Scaffold00994       | 225573                         | (T/C)       |
| 33611       | CadSNP9206     | <i>Desi</i>      | Ca_Desig_Scaffold00994       | 225580                         | (A/G)       |
| 33612       | CadSNP9207     | <i>Desi</i>      | Ca_Desig_Scaffold00994       | 225581                         | (C/A)       |
| 33613       | CadSNP9208     | <i>Desi</i>      | Ca_Desig_Scaffold00994       | 225593                         | (C/T)       |
| 33614       | CadSNP9209     | <i>Desi</i>      | Ca_Desig_Scaffold00994       | 225780                         | (A/T)       |
| 33615       | CadSNP9210     | <i>Desi</i>      | Ca_Desig_Scaffold00994       | 225777                         | (G/A)       |
| 33616       | CadSNP9211     | <i>Desi</i>      | Ca_Desig_Scaffold00994       | 225771                         | (T/C)       |
| 33617       | CadSNP9212     | <i>Desi</i>      | Ca_Desig_Scaffold00994       | 225738                         | (T/A)       |
| 33618       | CadSNP9213     | <i>Desi</i>      | Ca_Desig_Scaffold00994       | 225702                         | (G/A)       |
| 33619       | CadSNP9214     | <i>Desi</i>      | Ca_Desig_Scaffold00994       | 225873                         | (G/C)       |
| 33620       | CadSNP9215     | <i>Desi</i>      | Ca_Desig_Scaffold00994       | 243663                         | (G/A)       |
| 33621       | CadSNP9216     | <i>Desi</i>      | Ca_Desig_Scaffold00994       | 243700                         | (T/C)       |
| 33622       | CadSNP9217     | <i>Desi</i>      | Ca_Desig_Scaffold00994       | 243732                         | (A/C)       |
| 33623       | CadSNP9218     | <i>Desi</i>      | Ca_Desig_Scaffold00996       | 34784                          | (A/G)       |
| 33624       | CadSNP9219     | <i>Desi</i>      | Ca_Desig_Scaffold00996       | 34826                          | (A/C)       |
| 33625       | CadSNP9220     | <i>Desi</i>      | Ca_Desig_Scaffold00997       | 4009                           | (C/A)       |
| 33626       | CadSNP9221     | <i>Desi</i>      | Ca_Desig_Scaffold00997       | 4020                           | (A/T)       |
| 33627       | CadSNP9222     | <i>Desi</i>      | Ca_Desig_Scaffold00997       | 4036                           | (T/A)       |
| 33628       | CadSNP9223     | <i>Desi</i>      | Ca_Desig_Scaffold00997       | 4039                           | (A/C)       |
| 33629       | CadSNP9224     | <i>Desi</i>      | Ca_Desig_Scaffold00997       | 4072                           | (G/A)       |

| <b>S.N.</b> | <b>SNP IDs</b> | <b>Cultivars</b> | <b>Chromosomes/scaffolds</b> | <b>Physical positions (bp)</b> | <b>SNPs</b> |
|-------------|----------------|------------------|------------------------------|--------------------------------|-------------|
| 33630       | CadSNP9225     | <i>Desi</i>      | Ca_Desig_Scaffold00997       | 5390                           | (A/T)       |
| 33631       | CadSNP9226     | <i>Desi</i>      | Ca_Desig_Scaffold00997       | 58092                          | (G/A)       |
| 33632       | CadSNP9227     | <i>Desi</i>      | Ca_Desig_Scaffold00998       | 86958                          | (G/A)       |
| 33633       | CadSNP9228     | <i>Desi</i>      | Ca_Desig_Scaffold00998       | 86974                          | (G/A)       |
| 33634       | CadSNP9229     | <i>Desi</i>      | Ca_Desig_Scaffold00998       | 109960                         | (A/G)       |
| 33635       | CadSNP9230     | <i>Desi</i>      | Ca_Desig_Scaffold01004       | 97376                          | (C/A)       |
| 33636       | CadSNP9231     | <i>Desi</i>      | Ca_Desig_Scaffold01006       | 49018                          | (G/A)       |
| 33637       | CadSNP9232     | <i>Desi</i>      | Ca_Desig_Scaffold01007       | 95731                          | (C/T)       |
| 33638       | CadSNP9233     | <i>Desi</i>      | Ca_Desig_Scaffold01007       | 95736                          | (A/T)       |
| 33639       | CadSNP9234     | <i>Desi</i>      | Ca_Desig_Scaffold01008       | 10460                          | (C/T)       |
| 33640       | CadSNP9235     | <i>Desi</i>      | Ca_Desig_Scaffold01008       | 10511                          | (C/T)       |
| 33641       | CadSNP9236     | <i>Desi</i>      | Ca_Desig_Scaffold01008       | 57460                          | (T/C)       |
| 33642       | CadSNP9237     | <i>Desi</i>      | Ca_Desig_Scaffold01008       | 57564                          | (A/T)       |
| 33643       | CadSNP9238     | <i>Desi</i>      | Ca_Desig_Scaffold01008       | 95248                          | (A/T)       |
| 33644       | CadSNP9239     | <i>Desi</i>      | Ca_Desig_Scaffold01008       | 95268                          | (C/T)       |
| 33645       | CadSNP9240     | <i>Desi</i>      | Ca_Desig_Scaffold01010       | 62694                          | (C/T)       |
| 33646       | CadSNP9241     | <i>Desi</i>      | Ca_Desig_Scaffold01010       | 68856                          | (C/A)       |
| 33647       | CadSNP9242     | <i>Desi</i>      | Ca_Desig_Scaffold01013       | 52145                          | (C/A)       |
| 33648       | CadSNP9243     | <i>Desi</i>      | Ca_Desig_Scaffold01013       | 88643                          | (G/A)       |
| 33649       | CadSNP9244     | <i>Desi</i>      | Ca_Desig_Scaffold01013       | 88638                          | (C/T)       |
| 33650       | CadSNP9245     | <i>Desi</i>      | Ca_Desig_Scaffold01013       | 89864                          | (G/A)       |
| 33651       | CadSNP9246     | <i>Desi</i>      | Ca_Desig_Scaffold01013       | 89889                          | (G/T)       |
| 33652       | CadSNP9247     | <i>Desi</i>      | Ca_Desig_Scaffold01013       | 89894                          | (A/T)       |
| 33653       | CadSNP9248     | <i>Desi</i>      | Ca_Desig_Scaffold01015       | 23020                          | (C/A)       |
| 33654       | CadSNP9249     | <i>Desi</i>      | Ca_Desig_Scaffold01016       | 28196                          | (G/C)       |
| 33655       | CadSNP9250     | <i>Desi</i>      | Ca_Desig_Scaffold01016       | 29019                          | (C/T)       |
| 33656       | CadSNP9251     | <i>Desi</i>      | Ca_Desig_Scaffold01016       | 46346                          | (T/A)       |
| 33657       | CadSNP9252     | <i>Desi</i>      | Ca_Desig_Scaffold01016       | 46359                          | (A/G)       |
| 33658       | CadSNP9253     | <i>Desi</i>      | Ca_Desig_Scaffold01016       | 46449                          | (T/C)       |
| 33659       | CadSNP9254     | <i>Desi</i>      | Ca_Desig_Scaffold01016       | 46440                          | (T/C)       |
| 33660       | CadSNP9255     | <i>Desi</i>      | Ca_Desig_Scaffold01018       | 24698                          | (A/C)       |
| 33661       | CadSNP9256     | <i>Desi</i>      | Ca_Desig_Scaffold01018       | 24729                          | (T/A)       |
| 33662       | CadSNP9257     | <i>Desi</i>      | Ca_Desig_Scaffold01018       | 69129                          | (A/G)       |
| 33663       | CadSNP9258     | <i>Desi</i>      | Ca_Desig_Scaffold01022       | 4330                           | (T/C)       |
| 33664       | CadSNP9259     | <i>Desi</i>      | Ca_Desig_Scaffold01022       | 4340                           | (T/C)       |
| 33665       | CadSNP9260     | <i>Desi</i>      | Ca_Desig_Scaffold01022       | 4361                           | (C/A)       |
| 33666       | CadSNP9261     | <i>Desi</i>      | Ca_Desig_Scaffold01022       | 4364                           | (T/C)       |
| 33667       | CadSNP9262     | <i>Desi</i>      | Ca_Desig_Scaffold01024       | 83084                          | (A/C)       |



| <b>S.N.</b> | <b>SNP IDs</b> | <b>Cultivars</b> | <b>Chromosomes/scaffolds</b> | <b>Physical positions (bp)</b> | <b>SNPs</b> |
|-------------|----------------|------------------|------------------------------|--------------------------------|-------------|
| 33668       | CadSNP9263     | <i>Desi</i>      | Ca_Desig_Scaffold01025       | 30164                          | (T/G)       |
| 33669       | CadSNP9264     | <i>Desi</i>      | Ca_Desig_Scaffold01025       | 56713                          | (T/C)       |
| 33670       | CadSNP9265     | <i>Desi</i>      | Ca_Desig_Scaffold01029       | 32701                          | (A/G)       |
| 33671       | CadSNP9266     | <i>Desi</i>      | Ca_Desig_Scaffold01029       | 61153                          | (C/T)       |
| 33672       | CadSNP9267     | <i>Desi</i>      | Ca_Desig_Scaffold01030       | 19516                          | (G/C)       |
| 33673       | CadSNP9268     | <i>Desi</i>      | Ca_Desig_Scaffold01030       | 19561                          | (T/C)       |
| 33674       | CadSNP9269     | <i>Desi</i>      | Ca_Desig_Scaffold01030       | 47219                          | (T/C)       |
| 33675       | CadSNP9270     | <i>Desi</i>      | Ca_Desig_Scaffold01030       | 47291                          | (A/T)       |
| 33676       | CadSNP9271     | <i>Desi</i>      | Ca_Desig_Scaffold01030       | 68993                          | (T/G)       |
| 33677       | CadSNP9272     | <i>Desi</i>      | Ca_Desig_Scaffold01031       | 25396                          | (A/C)       |
| 33678       | CadSNP9273     | <i>Desi</i>      | Ca_Desig_Scaffold01031       | 25418                          | (T/A)       |
| 33679       | CadSNP9274     | <i>Desi</i>      | Ca_Desig_Scaffold01032       | 20608                          | (A/G)       |
| 33680       | CadSNP9275     | <i>Desi</i>      | Ca_Desig_Scaffold01034       | 25742                          | (C/T)       |
| 33681       | CadSNP9276     | <i>Desi</i>      | Ca_Desig_Scaffold01034       | 25777                          | (C/A)       |
| 33682       | CadSNP9277     | <i>Desi</i>      | Ca_Desig_Scaffold01044       | 17925                          | (T/C)       |
| 33683       | CadSNP9278     | <i>Desi</i>      | Ca_Desig_Scaffold01044       | 44938                          | (C/T)       |
| 33684       | CadSNP9279     | <i>Desi</i>      | Ca_Desig_Scaffold01044       | 44949                          | (A/T)       |
| 33685       | CadSNP9280     | <i>Desi</i>      | Ca_Desig_Scaffold01044       | 71581                          | (G/A)       |
| 33686       | CadSNP9281     | <i>Desi</i>      | Ca_Desig_Scaffold01044       | 83854                          | (G/A)       |
| 33687       | CadSNP9282     | <i>Desi</i>      | Ca_Desig_Scaffold01045       | 13505                          | (T/A)       |
| 33688       | CadSNP9283     | <i>Desi</i>      | Ca_Desig_Scaffold01045       | 76264                          | (T/C)       |
| 33689       | CadSNP9284     | <i>Desi</i>      | Ca_Desig_Scaffold01045       | 78057                          | (A/G)       |
| 33690       | CadSNP9285     | <i>Desi</i>      | Ca_Desig_Scaffold01045       | 87081                          | (C/T)       |
| 33691       | CadSNP9286     | <i>Desi</i>      | Ca_Desig_Scaffold01045       | 87100                          | (A/G)       |
| 33692       | CadSNP9287     | <i>Desi</i>      | Ca_Desig_Scaffold01045       | 88362                          | (G/T)       |
| 33693       | CadSNP9288     | <i>Desi</i>      | Ca_Desig_Scaffold01045       | 88378                          | (G/T)       |
| 33694       | CadSNP9289     | <i>Desi</i>      | Ca_Desig_Scaffold01045       | 88406                          | (T/G)       |
| 33695       | CadSNP9290     | <i>Desi</i>      | Ca_Desig_Scaffold01046       | 9495                           | (G/C)       |
| 33696       | CadSNP9291     | <i>Desi</i>      | Ca_Desig_Scaffold01046       | 80740                          | (G/A)       |
| 33697       | CadSNP9292     | <i>Desi</i>      | Ca_Desig_Scaffold01046       | 80800                          | (G/A)       |
| 33698       | CadSNP9293     | <i>Desi</i>      | Ca_Desig_Scaffold01046       | 80799                          | (C/T)       |
| 33699       | CadSNP9294     | <i>Desi</i>      | Ca_Desig_Scaffold01055       | 72467                          | (T/C)       |
| 33700       | CadSNP9295     | <i>Desi</i>      | Ca_Desig_Scaffold01055       | 72524                          | (C/A)       |
| 33701       | CadSNP9296     | <i>Desi</i>      | Ca_Desig_Scaffold01055       | 72603                          | (C/G)       |
| 33702       | CadSNP9297     | <i>Desi</i>      | Ca_Desig_Scaffold01056       | 159521                         | (C/A)       |
| 33703       | CadSNP9298     | <i>Desi</i>      | Ca_Desig_Scaffold01058       | 85980                          | (G/A)       |
| 33704       | CadSNP9299     | <i>Desi</i>      | Ca_Desig_Scaffold01060       | 33360                          | (A/G)       |
| 33705       | CadSNP9300     | <i>Desi</i>      | Ca_Desig_Scaffold01063       | 40084                          | (G/A)       |

| <b>S.N.</b> | <b>SNP IDs</b> | <b>Cultivars</b> | <b>Chromosomes/scaffolds</b> | <b>Physical positions (bp)</b> | <b>SNPs</b> |
|-------------|----------------|------------------|------------------------------|--------------------------------|-------------|
| 33706       | CadSNP9301     | <i>Desi</i>      | Ca_Desig_Scaffold01063       | 40128                          | (G/C)       |
| 33707       | CadSNP9302     | <i>Desi</i>      | Ca_Desig_Scaffold01063       | 40154                          | (T/C)       |
| 33708       | CadSNP9303     | <i>Desi</i>      | Ca_Desig_Scaffold01066       | 77643                          | (G/A)       |
| 33709       | CadSNP9304     | <i>Desi</i>      | Ca_Desig_Scaffold01066       | 77706                          | (T/G)       |
| 33710       | CadSNP9305     | <i>Desi</i>      | Ca_Desig_Scaffold01066       | 78761                          | (G/C)       |
| 33711       | CadSNP9306     | <i>Desi</i>      | Ca_Desig_Scaffold01066       | 78792                          | (T/C)       |
| 33712       | CadSNP9307     | <i>Desi</i>      | Ca_Desig_Scaffold01066       | 79509                          | (T/A)       |
| 33713       | CadSNP9308     | <i>Desi</i>      | Ca_Desig_Scaffold01066       | 79503                          | (T/C)       |
| 33714       | CadSNP9309     | <i>Desi</i>      | Ca_Desig_Scaffold01066       | 79478                          | (G/A)       |
| 33715       | CadSNP9310     | <i>Desi</i>      | Ca_Desig_Scaffold01066       | 79464                          | (T/C)       |
| 33716       | CadSNP9311     | <i>Desi</i>      | Ca_Desig_Scaffold01066       | 79521                          | (A/T)       |
| 33717       | CadSNP9312     | <i>Desi</i>      | Ca_Desig_Scaffold01070       | 26503                          | (T/C)       |
| 33718       | CadSNP9313     | <i>Desi</i>      | Ca_Desig_Scaffold01070       | 82471                          | (C/T)       |
| 33719       | CadSNP9314     | <i>Desi</i>      | Ca_Desig_Scaffold01074       | 4265                           | (C/A)       |
| 33720       | CadSNP9315     | <i>Desi</i>      | Ca_Desig_Scaffold01074       | 63107                          | (T/G)       |
| 33721       | CadSNP9316     | <i>Desi</i>      | Ca_Desig_Scaffold01074       | 84223                          | (C/T)       |
| 33722       | CadSNP9317     | <i>Desi</i>      | Ca_Desig_Scaffold01078       | 36673                          | (T/C)       |
| 33723       | CadSNP9318     | <i>Desi</i>      | Ca_Desig_Scaffold01079       | 61423                          | (A/C)       |
| 33724       | CadSNP9319     | <i>Desi</i>      | Ca_Desig_Scaffold01081       | 37593                          | (T/C)       |
| 33725       | CadSNP9320     | <i>Desi</i>      | Ca_Desig_Scaffold01081       | 37618                          | (T/G)       |
| 33726       | CadSNP9321     | <i>Desi</i>      | Ca_Desig_Scaffold01081       | 66038                          | (G/A)       |
| 33727       | CadSNP9322     | <i>Desi</i>      | Ca_Desig_Scaffold01081       | 66069                          | (G/T)       |
| 33728       | CadSNP9323     | <i>Desi</i>      | Ca_Desig_Scaffold01081       | 66068                          | (A/T)       |
| 33729       | CadSNP9324     | <i>Desi</i>      | Ca_Desig_Scaffold01081       | 69994                          | (T/C)       |
| 33730       | CadSNP9325     | <i>Desi</i>      | Ca_Desig_Scaffold01081       | 70026                          | (C/T)       |
| 33731       | CadSNP9326     | <i>Desi</i>      | Ca_Desig_Scaffold01081       | 70027                          | (C/T)       |
| 33732       | CadSNP9327     | <i>Desi</i>      | Ca_Desig_Scaffold01081       | 70036                          | (G/A)       |
| 33733       | CadSNP9328     | <i>Desi</i>      | Ca_Desig_Scaffold01081       | 70041                          | (G/A)       |
| 33734       | CadSNP9329     | <i>Desi</i>      | Ca_Desig_Scaffold01081       | 70047                          | (G/A)       |
| 33735       | CadSNP9330     | <i>Desi</i>      | Ca_Desig_Scaffold01081       | 71125                          | (G/A)       |
| 33736       | CadSNP9331     | <i>Desi</i>      | Ca_Desig_Scaffold01081       | 71196                          | (C/G)       |
| 33737       | CadSNP9332     | <i>Desi</i>      | Ca_Desig_Scaffold01081       | 71195                          | (T/C)       |
| 33738       | CadSNP9333     | <i>Desi</i>      | Ca_Desig_Scaffold01081       | 71187                          | (G/A)       |
| 33739       | CadSNP9334     | <i>Desi</i>      | Ca_Desig_Scaffold01081       | 71314                          | (A/G)       |
| 33740       | CadSNP9335     | <i>Desi</i>      | Ca_Desig_Scaffold01082       | 12246                          | (A/C)       |
| 33741       | CadSNP9336     | <i>Desi</i>      | Ca_Desig_Scaffold01082       | 14997                          | (A/G)       |
| 33742       | CadSNP9337     | <i>Desi</i>      | Ca_Desig_Scaffold01082       | 15031                          | (G/A)       |
| 33743       | CadSNP9338     | <i>Desi</i>      | Ca_Desig_Scaffold01082       | 15034                          | (G/C)       |

| <b>S.N.</b> | <b>SNP IDs</b> | <b>Cultivars</b> | <b>Chromosomes/scaffolds</b> | <b>Physical positions (bp)</b> | <b>SNPs</b> |
|-------------|----------------|------------------|------------------------------|--------------------------------|-------------|
| 33744       | CadSNP9339     | <i>Desi</i>      | Ca_Desig_Scaffold01082       | 30083                          | (T/A)       |
| 33745       | CadSNP9340     | <i>Desi</i>      | Ca_Desig_Scaffold01086       | 48903                          | (T/A)       |
| 33746       | CadSNP9341     | <i>Desi</i>      | Ca_Desig_Scaffold01092       | 79248                          | (T/G)       |
| 33747       | CadSNP9342     | <i>Desi</i>      | Ca_Desig_Scaffold01094       | 74659                          | (T/G)       |
| 33748       | CadSNP9343     | <i>Desi</i>      | Ca_Desig_Scaffold01094       | 75315                          | (A/G)       |
| 33749       | CadSNP9344     | <i>Desi</i>      | Ca_Desig_Scaffold01100       | 20409                          | (G/T)       |
| 33750       | CadSNP9345     | <i>Desi</i>      | Ca_Desig_Scaffold01100       | 44734                          | (G/A)       |
| 33751       | CadSNP9346     | <i>Desi</i>      | Ca_Desig_Scaffold01100       | 44748                          | (A/G)       |
| 33752       | CadSNP9347     | <i>Desi</i>      | Ca_Desig_Scaffold01100       | 44762                          | (C/T)       |
| 33753       | CadSNP9348     | <i>Desi</i>      | Ca_Desig_Scaffold01100       | 44848                          | (C/G)       |
| 33754       | CadSNP9349     | <i>Desi</i>      | Ca_Desig_Scaffold01100       | 50421                          | (G/C)       |
| 33755       | CadSNP9350     | <i>Desi</i>      | Ca_Desig_Scaffold01100       | 50469                          | (G/A)       |
| 33756       | CadSNP9351     | <i>Desi</i>      | Ca_Desig_Scaffold01100       | 50559                          | (G/A)       |
| 33757       | CadSNP9352     | <i>Desi</i>      | Ca_Desig_Scaffold01100       | 50525                          | (G/A)       |
| 33758       | CadSNP9353     | <i>Desi</i>      | Ca_Desig_Scaffold01100       | 50507                          | (G/A)       |
| 33759       | CadSNP9354     | <i>Desi</i>      | Ca_Desig_Scaffold01100       | 50549                          | (C/T)       |
| 33760       | CadSNP9355     | <i>Desi</i>      | Ca_Desig_Scaffold01100       | 50503                          | (C/T)       |
| 33761       | CadSNP9356     | <i>Desi</i>      | Ca_Desig_Scaffold01100       | 50594                          | (A/G)       |
| 33762       | CadSNP9357     | <i>Desi</i>      | Ca_Desig_Scaffold01100       | 50580                          | (G/A)       |
| 33763       | CadSNP9358     | <i>Desi</i>      | Ca_Desig_Scaffold01100       | 50624                          | (G/A)       |
| 33764       | CadSNP9359     | <i>Desi</i>      | Ca_Desig_Scaffold01100       | 50686                          | (T/A)       |
| 33765       | CadSNP9360     | <i>Desi</i>      | Ca_Desig_Scaffold01100       | 50682                          | (C/A)       |
| 33766       | CadSNP9361     | <i>Desi</i>      | Ca_Desig_Scaffold01100       | 50672                          | (C/T)       |
| 33767       | CadSNP9362     | <i>Desi</i>      | Ca_Desig_Scaffold01100       | 50664                          | (T/C)       |
| 33768       | CadSNP9363     | <i>Desi</i>      | Ca_Desig_Scaffold01100       | 50694                          | (C/T)       |
| 33769       | CadSNP9364     | <i>Desi</i>      | Ca_Desig_Scaffold01100       | 50730                          | (T/C)       |
| 33770       | CadSNP9365     | <i>Desi</i>      | Ca_Desig_Scaffold01100       | 50696                          | (G/C)       |
| 33771       | CadSNP9366     | <i>Desi</i>      | Ca_Desig_Scaffold01103       | 32607                          | (G/A)       |
| 33772       | CadSNP9367     | <i>Desi</i>      | Ca_Desig_Scaffold01103       | 33402                          | (A/T)       |
| 33773       | CadSNP9368     | <i>Desi</i>      | Ca_Desig_Scaffold01103       | 33437                          | (G/C)       |
| 33774       | CadSNP9369     | <i>Desi</i>      | Ca_Desig_Scaffold01107       | 9570                           | (A/G)       |
| 33775       | CadSNP9370     | <i>Desi</i>      | Ca_Desig_Scaffold01107       | 9609                           | (G/T)       |
| 33776       | CadSNP9371     | <i>Desi</i>      | Ca_Desig_Scaffold01107       | 9636                           | (C/T)       |
| 33777       | CadSNP9372     | <i>Desi</i>      | Ca_Desig_Scaffold01107       | 9995                           | (T/A)       |
| 33778       | CadSNP9373     | <i>Desi</i>      | Ca_Desig_Scaffold01107       | 10065                          | (A/G)       |
| 33779       | CadSNP9374     | <i>Desi</i>      | Ca_Desig_Scaffold01109       | 47216                          | (A/C)       |
| 33780       | CadSNP9375     | <i>Desi</i>      | Ca_Desig_Scaffold01112       | 29826                          | (T/C)       |
| 33781       | CadSNP9376     | <i>Desi</i>      | Ca_Desig_Scaffold01112       | 37141                          | (G/C)       |

| <b>S.N.</b> | <b>SNP IDs</b> | <b>Cultivars</b> | <b>Chromosomes/scaffolds</b> | <b>Physical positions (bp)</b> | <b>SNPs</b> |
|-------------|----------------|------------------|------------------------------|--------------------------------|-------------|
| 33782       | CadSNP9377     | <i>Desi</i>      | Ca_Desig_Scaffold01112       | 67077                          | (A/T)       |
| 33783       | CadSNP9378     | <i>Desi</i>      | Ca_Desig_Scaffold01114       | 59943                          | (A/T)       |
| 33784       | CadSNP9379     | <i>Desi</i>      | Ca_Desig_Scaffold01120       | 40467                          | (G/T)       |
| 33785       | CadSNP9380     | <i>Desi</i>      | Ca_Desig_Scaffold01120       | 45051                          | (A/G)       |
| 33786       | CadSNP9381     | <i>Desi</i>      | Ca_Desig_Scaffold01120       | 45057                          | (T/C)       |
| 33787       | CadSNP9382     | <i>Desi</i>      | Ca_Desig_Scaffold01120       | 80913                          | (G/A)       |
| 33788       | CadSNP9383     | <i>Desi</i>      | Ca_Desig_Scaffold01120       | 81951                          | (C/T)       |
| 33789       | CadSNP9384     | <i>Desi</i>      | Ca_Desig_Scaffold01120       | 90046                          | (G/A)       |
| 33790       | CadSNP9385     | <i>Desi</i>      | Ca_Desig_Scaffold01120       | 90071                          | (G/A)       |
| 33791       | CadSNP9386     | <i>Desi</i>      | Ca_Desig_Scaffold01120       | 90102                          | (G/C)       |
| 33792       | CadSNP9387     | <i>Desi</i>      | Ca_Desig_Scaffold01121       | 8582                           | (C/A)       |
| 33793       | CadSNP9388     | <i>Desi</i>      | Ca_Desig_Scaffold01121       | 64891                          | (C/A)       |
| 33794       | CadSNP9389     | <i>Desi</i>      | Ca_Desig_Scaffold01121       | 64881                          | (G/A)       |
| 33795       | CadSNP9390     | <i>Desi</i>      | Ca_Desig_Scaffold01121       | 64868                          | (T/C)       |
| 33796       | CadSNP9391     | <i>Desi</i>      | Ca_Desig_Scaffold01121       | 64865                          | (C/A)       |
| 33797       | CadSNP9392     | <i>Desi</i>      | Ca_Desig_Scaffold01121       | 64863                          | (T/A)       |
| 33798       | CadSNP9393     | <i>Desi</i>      | Ca_Desig_Scaffold01121       | 64918                          | (A/C)       |
| 33799       | CadSNP9394     | <i>Desi</i>      | Ca_Desig_Scaffold01121       | 80074                          | (C/T)       |
| 33800       | CadSNP9395     | <i>Desi</i>      | Ca_Desig_Scaffold01122       | 81700                          | (A/T)       |
| 33801       | CadSNP9396     | <i>Desi</i>      | Ca_Desig_Scaffold01122       | 81699                          | (C/A)       |
| 33802       | CadSNP9397     | <i>Desi</i>      | Ca_Desig_Scaffold01122       | 81692                          | (C/T)       |
| 33803       | CadSNP9398     | <i>Desi</i>      | Ca_Desig_Scaffold01122       | 81689                          | (C/G)       |
| 33804       | CadSNP9399     | <i>Desi</i>      | Ca_Desig_Scaffold01122       | 81688                          | (A/T)       |
| 33805       | CadSNP9400     | <i>Desi</i>      | Ca_Desig_Scaffold01122       | 81677                          | (C/A)       |
| 33806       | CadSNP9401     | <i>Desi</i>      | Ca_Desig_Scaffold01122       | 81676                          | (A/G)       |
| 33807       | CadSNP9402     | <i>Desi</i>      | Ca_Desig_Scaffold01122       | 81670                          | (G/A)       |
| 33808       | CadSNP9403     | <i>Desi</i>      | Ca_Desig_Scaffold01122       | 81669                          | (A/G)       |
| 33809       | CadSNP9404     | <i>Desi</i>      | Ca_Desig_Scaffold01122       | 81668                          | (C/A)       |
| 33810       | CadSNP9405     | <i>Desi</i>      | Ca_Desig_Scaffold01122       | 81666                          | (C/T)       |
| 33811       | CadSNP9406     | <i>Desi</i>      | Ca_Desig_Scaffold01122       | 81797                          | (T/G)       |
| 33812       | CadSNP9407     | <i>Desi</i>      | Ca_Desig_Scaffold01123       | 11283                          | (C/A)       |
| 33813       | CadSNP9408     | <i>Desi</i>      | Ca_Desig_Scaffold01123       | 11284                          | (G/T)       |
| 33814       | CadSNP9409     | <i>Desi</i>      | Ca_Desig_Scaffold01128       | 14                             | (A/G)       |
| 33815       | CadSNP9410     | <i>Desi</i>      | Ca_Desig_Scaffold01129       | 27484                          | (G/A)       |
| 33816       | CadSNP9411     | <i>Desi</i>      | Ca_Desig_Scaffold01129       | 27507                          | (G/A)       |
| 33817       | CadSNP9412     | <i>Desi</i>      | Ca_Desig_Scaffold01129       | 86744                          | (C/T)       |
| 33818       | CadSNP9413     | <i>Desi</i>      | Ca_Desig_Scaffold01129       | 86749                          | (T/C)       |
| 33819       | CadSNP9414     | <i>Desi</i>      | Ca_Desig_Scaffold01131       | 44353                          | (C/T)       |

| <b>S.N.</b> | <b>SNP IDs</b> | <b>Cultivars</b> | <b>Chromosomes/scaffolds</b> | <b>Physical positions (bp)</b> | <b>SNPs</b> |
|-------------|----------------|------------------|------------------------------|--------------------------------|-------------|
| 33820       | CadSNP9415     | <i>Desi</i>      | Ca_Desig_Scaffold01131       | 44348                          | (G/A)       |
| 33821       | CadSNP9416     | <i>Desi</i>      | Ca_Desig_Scaffold01131       | 48552                          | (A/G)       |
| 33822       | CadSNP9417     | <i>Desi</i>      | Ca_Desig_Scaffold01131       | 49647                          | (A/G)       |
| 33823       | CadSNP9418     | <i>Desi</i>      | Ca_Desig_Scaffold01133       | 23553                          | (G/C)       |
| 33824       | CadSNP9419     | <i>Desi</i>      | Ca_Desig_Scaffold01133       | 66226                          | (G/T)       |
| 33825       | CadSNP9420     | <i>Desi</i>      | Ca_Desig_Scaffold01133       | 66295                          | (T/C)       |
| 33826       | CadSNP9421     | <i>Desi</i>      | Ca_Desig_Scaffold01135       | 67560                          | (A/T)       |
| 33827       | CadSNP9422     | <i>Desi</i>      | Ca_Desig_Scaffold01138       | 183340                         | (G/A)       |
| 33828       | CadSNP9423     | <i>Desi</i>      | Ca_Desig_Scaffold01138       | 189585                         | (G/A)       |
| 33829       | CadSNP9424     | <i>Desi</i>      | Ca_Desig_Scaffold01139       | 12471                          | (T/C)       |
| 33830       | CadSNP9425     | <i>Desi</i>      | Ca_Desig_Scaffold01139       | 82974                          | (C/T)       |
| 33831       | CadSNP9426     | <i>Desi</i>      | Ca_Desig_Scaffold01141       | 5464                           | (T/G)       |
| 33832       | CadSNP9427     | <i>Desi</i>      | Ca_Desig_Scaffold01141       | 5872                           | (A/C)       |
| 33833       | CadSNP9428     | <i>Desi</i>      | Ca_Desig_Scaffold01142       | 59295                          | (A/G)       |
| 33834       | CadSNP9429     | <i>Desi</i>      | Ca_Desig_Scaffold01145       | 1432                           | (T/C)       |
| 33835       | CadSNP9430     | <i>Desi</i>      | Ca_Desig_Scaffold01148       | 21511                          | (T/C)       |
| 33836       | CadSNP9431     | <i>Desi</i>      | Ca_Desig_Scaffold01148       | 21486                          | (C/A)       |
| 33837       | CadSNP9432     | <i>Desi</i>      | Ca_Desig_Scaffold01148       | 24195                          | (C/T)       |
| 33838       | CadSNP9433     | <i>Desi</i>      | Ca_Desig_Scaffold01148       | 48197                          | (C/T)       |
| 33839       | CadSNP9434     | <i>Desi</i>      | Ca_Desig_Scaffold01148       | 48230                          | (T/C)       |
| 33840       | CadSNP9435     | <i>Desi</i>      | Ca_Desig_Scaffold01148       | 49643                          | (C/A)       |
| 33841       | CadSNP9436     | <i>Desi</i>      | Ca_Desig_Scaffold01149       | 19503                          | (T/C)       |
| 33842       | CadSNP9437     | <i>Desi</i>      | Ca_Desig_Scaffold01149       | 224769                         | (C/A)       |
| 33843       | CadSNP9438     | <i>Desi</i>      | Ca_Desig_Scaffold01149       | 224768                         | (C/A)       |
| 33844       | CadSNP9439     | <i>Desi</i>      | Ca_Desig_Scaffold01149       | 231983                         | (G/T)       |
| 33845       | CadSNP9440     | <i>Desi</i>      | Ca_Desig_Scaffold01149       | 234912                         | (A/T)       |
| 33846       | CadSNP9441     | <i>Desi</i>      | Ca_Desig_Scaffold01149       | 234930                         | (T/G)       |
| 33847       | CadSNP9442     | <i>Desi</i>      | Ca_Desig_Scaffold01149       | 234941                         | (G/A)       |
| 33848       | CadSNP9443     | <i>Desi</i>      | Ca_Desig_Scaffold01149       | 234951                         | (G/A)       |
| 33849       | CadSNP9444     | <i>Desi</i>      | Ca_Desig_Scaffold01150       | 9627                           | (G/A)       |
| 33850       | CadSNP9445     | <i>Desi</i>      | Ca_Desig_Scaffold01151       | 67491                          | (A/C)       |
| 33851       | CadSNP9446     | <i>Desi</i>      | Ca_Desig_Scaffold01151       | 76068                          | (A/G)       |
| 33852       | CadSNP9447     | <i>Desi</i>      | Ca_Desig_Scaffold01156       | 45655                          | (A/G)       |
| 33853       | CadSNP9448     | <i>Desi</i>      | Ca_Desig_Scaffold01156       | 45702                          | (T/A)       |
| 33854       | CadSNP9449     | <i>Desi</i>      | Ca_Desig_Scaffold01156       | 45699                          | (G/A)       |
| 33855       | CadSNP9450     | <i>Desi</i>      | Ca_Desig_Scaffold01156       | 46486                          | (C/G)       |
| 33856       | CadSNP9451     | <i>Desi</i>      | Ca_Desig_Scaffold01156       | 46513                          | (C/G)       |
| 33857       | CadSNP9452     | <i>Desi</i>      | Ca_Desig_Scaffold01156       | 46518                          | (C/G)       |

| <b>S.N.</b> | <b>SNP IDs</b> | <b>Cultivars</b> | <b>Chromosomes/scaffolds</b> | <b>Physical positions (bp)</b> | <b>SNPs</b> |
|-------------|----------------|------------------|------------------------------|--------------------------------|-------------|
| 33858       | CadSNP9453     | <i>Desi</i>      | Ca_Desig_Scaffold01162       | 31992                          | (T/C)       |
| 33859       | CadSNP9454     | <i>Desi</i>      | Ca_Desig_Scaffold01164       | 33958                          | (A/G)       |
| 33860       | CadSNP9455     | <i>Desi</i>      | Ca_Desig_Scaffold01165       | 20355                          | (A/T)       |
| 33861       | CadSNP9456     | <i>Desi</i>      | Ca_Desig_Scaffold01165       | 71874                          | (A/C)       |
| 33862       | CadSNP9457     | <i>Desi</i>      | Ca_Desig_Scaffold01165       | 74087                          | (A/C)       |
| 33863       | CadSNP9458     | <i>Desi</i>      | Ca_Desig_Scaffold01166       | 21270                          | (A/G)       |
| 33864       | CadSNP9459     | <i>Desi</i>      | Ca_Desig_Scaffold01166       | 34273                          | (C/G)       |
| 33865       | CadSNP9460     | <i>Desi</i>      | Ca_Desig_Scaffold01168       | 16641                          | (C/T)       |
| 33866       | CadSNP9461     | <i>Desi</i>      | Ca_Desig_Scaffold01168       | 16638                          | (G/A)       |
| 33867       | CadSNP9462     | <i>Desi</i>      | Ca_Desig_Scaffold01168       | 16629                          | (A/G)       |
| 33868       | CadSNP9463     | <i>Desi</i>      | Ca_Desig_Scaffold01168       | 16621                          | (T/C)       |
| 33869       | CadSNP9464     | <i>Desi</i>      | Ca_Desig_Scaffold01168       | 16617                          | (A/G)       |
| 33870       | CadSNP9465     | <i>Desi</i>      | Ca_Desig_Scaffold01169       | 47173                          | (A/T)       |
| 33871       | CadSNP9466     | <i>Desi</i>      | Ca_Desig_Scaffold01169       | 65104                          | (G/T)       |
| 33872       | CadSNP9467     | <i>Desi</i>      | Ca_Desig_Scaffold01169       | 65074                          | (G/A)       |
| 33873       | CadSNP9468     | <i>Desi</i>      | Ca_Desig_Scaffold01169       | 65061                          | (A/T)       |
| 33874       | CadSNP9469     | <i>Desi</i>      | Ca_Desig_Scaffold01170       | 41519                          | (A/G)       |
| 33875       | CadSNP9470     | <i>Desi</i>      | Ca_Desig_Scaffold01170       | 41530                          | (C/T)       |
| 33876       | CadSNP9471     | <i>Desi</i>      | Ca_Desig_Scaffold01170       | 41553                          | (A/G)       |
| 33877       | CadSNP9472     | <i>Desi</i>      | Ca_Desig_Scaffold01170       | 41567                          | (C/G)       |
| 33878       | CadSNP9473     | <i>Desi</i>      | Ca_Desig_Scaffold01170       | 46564                          | (T/G)       |
| 33879       | CadSNP9474     | <i>Desi</i>      | Ca_Desig_Scaffold01170       | 63184                          | (G/A)       |
| 33880       | CadSNP9475     | <i>Desi</i>      | Ca_Desig_Scaffold01170       | 63205                          | (C/T)       |
| 33881       | CadSNP9476     | <i>Desi</i>      | Ca_Desig_Scaffold01170       | 63217                          | (A/G)       |
| 33882       | CadSNP9477     | <i>Desi</i>      | Ca_Desig_Scaffold01170       | 63226                          | (C/T)       |
| 33883       | CadSNP9478     | <i>Desi</i>      | Ca_Desig_Scaffold01170       | 63234                          | (T/A)       |
| 33884       | CadSNP9479     | <i>Desi</i>      | Ca_Desig_Scaffold01170       | 63324                          | (T/G)       |
| 33885       | CadSNP9480     | <i>Desi</i>      | Ca_Desig_Scaffold01170       | 63404                          | (C/T)       |
| 33886       | CadSNP9481     | <i>Desi</i>      | Ca_Desig_Scaffold01170       | 75650                          | (C/G)       |
| 33887       | CadSNP9482     | <i>Desi</i>      | Ca_Desig_Scaffold01170       | 75625                          | (C/G)       |
| 33888       | CadSNP9483     | <i>Desi</i>      | Ca_Desig_Scaffold01170       | 75754                          | (C/T)       |
| 33889       | CadSNP9484     | <i>Desi</i>      | Ca_Desig_Scaffold01170       | 75753                          | (G/A)       |
| 33890       | CadSNP9485     | <i>Desi</i>      | Ca_Desig_Scaffold01170       | 75806                          | (C/G)       |
| 33891       | CadSNP9486     | <i>Desi</i>      | Ca_Desig_Scaffold01170       | 75878                          | (T/G)       |
| 33892       | CadSNP9487     | <i>Desi</i>      | Ca_Desig_Scaffold01170       | 75829                          | (G/A)       |
| 33893       | CadSNP9488     | <i>Desi</i>      | Ca_Desig_Scaffold01170       | 75885                          | (C/A)       |
| 33894       | CadSNP9489     | <i>Desi</i>      | Ca_Desig_Scaffold01172       | 61041                          | (G/A)       |
| 33895       | CadSNP9490     | <i>Desi</i>      | Ca_Desig_Scaffold01173       | 6510                           | (A/G)       |

| <b>S.N.</b> | <b>SNP IDs</b> | <b>Cultivars</b> | <b>Chromosomes/scaffolds</b> | <b>Physical positions (bp)</b> | <b>SNPs</b> |
|-------------|----------------|------------------|------------------------------|--------------------------------|-------------|
| 33896       | CadSNP9491     | <i>Desi</i>      | Ca_Desig_Scaffold01173       | 6462                           | (A/G)       |
| 33897       | CadSNP9492     | <i>Desi</i>      | Ca_Desig_Scaffold01173       | 6955                           | (A/G)       |
| 33898       | CadSNP9493     | <i>Desi</i>      | Ca_Desig_Scaffold01174       | 36613                          | (C/T)       |
| 33899       | CadSNP9494     | <i>Desi</i>      | Ca_Desig_Scaffold01180       | 17000                          | (T/G)       |
| 33900       | CadSNP9495     | <i>Desi</i>      | Ca_Desig_Scaffold01180       | 20953                          | (A/C)       |
| 33901       | CadSNP9496     | <i>Desi</i>      | Ca_Desig_Scaffold01180       | 24016                          | (T/G)       |
| 33902       | CadSNP9497     | <i>Desi</i>      | Ca_Desig_Scaffold01183       | 113501                         | (G/A)       |
| 33903       | CadSNP9498     | <i>Desi</i>      | Ca_Desig_Scaffold01183       | 113542                         | (C/G)       |
| 33904       | CadSNP9499     | <i>Desi</i>      | Ca_Desig_Scaffold01183       | 113564                         | (C/T)       |
| 33905       | CadSNP9500     | <i>Desi</i>      | Ca_Desig_Scaffold01183       | 125445                         | (T/A)       |
| 33906       | CadSNP9501     | <i>Desi</i>      | Ca_Desig_Scaffold01188       | 55984                          | (T/C)       |
| 33907       | CadSNP9502     | <i>Desi</i>      | Ca_Desig_Scaffold01189       | 75223                          | (G/C)       |
| 33908       | CadSNP9503     | <i>Desi</i>      | Ca_Desig_Scaffold01191       | 33230                          | (T/C)       |
| 33909       | CadSNP9504     | <i>Desi</i>      | Ca_Desig_Scaffold01191       | 33239                          | (A/G)       |
| 33910       | CadSNP9505     | <i>Desi</i>      | Ca_Desig_Scaffold01191       | 33258                          | (C/T)       |
| 33911       | CadSNP9506     | <i>Desi</i>      | Ca_Desig_Scaffold01191       | 33264                          | (C/G)       |
| 33912       | CadSNP9507     | <i>Desi</i>      | Ca_Desig_Scaffold01191       | 33275                          | (T/A)       |
| 33913       | CadSNP9508     | <i>Desi</i>      | Ca_Desig_Scaffold01191       | 33279                          | (C/A)       |
| 33914       | CadSNP9509     | <i>Desi</i>      | Ca_Desig_Scaffold01191       | 33287                          | (C/T)       |
| 33915       | CadSNP9510     | <i>Desi</i>      | Ca_Desig_Scaffold01191       | 33290                          | (T/C)       |
| 33916       | CadSNP9511     | <i>Desi</i>      | Ca_Desig_Scaffold01191       | 33338                          | (T/A)       |
| 33917       | CadSNP9512     | <i>Desi</i>      | Ca_Desig_Scaffold01191       | 33329                          | (T/G)       |
| 33918       | CadSNP9513     | <i>Desi</i>      | Ca_Desig_Scaffold01191       | 42134                          | (G/C)       |
| 33919       | CadSNP9514     | <i>Desi</i>      | Ca_Desig_Scaffold01191       | 42252                          | (A/G)       |
| 33920       | CadSNP9515     | <i>Desi</i>      | Ca_Desig_Scaffold01191       | 52241                          | (T/A)       |
| 33921       | CadSNP9516     | <i>Desi</i>      | Ca_Desig_Scaffold01191       | 52304                          | (A/T)       |
| 33922       | CadSNP9517     | <i>Desi</i>      | Ca_Desig_Scaffold01191       | 52298                          | (A/G)       |
| 33923       | CadSNP9518     | <i>Desi</i>      | Ca_Desig_Scaffold01191       | 52478                          | (T/A)       |
| 33924       | CadSNP9519     | <i>Desi</i>      | Ca_Desig_Scaffold01191       | 61548                          | (A/T)       |
| 33925       | CadSNP9520     | <i>Desi</i>      | Ca_Desig_Scaffold01191       | 61557                          | (T/C)       |
| 33926       | CadSNP9521     | <i>Desi</i>      | Ca_Desig_Scaffold01191       | 61560                          | (A/T)       |
| 33927       | CadSNP9522     | <i>Desi</i>      | Ca_Desig_Scaffold01191       | 61593                          | (T/G)       |
| 33928       | CadSNP9523     | <i>Desi</i>      | Ca_Desig_Scaffold01191       | 61625                          | (A/G)       |
| 33929       | CadSNP9524     | <i>Desi</i>      | Ca_Desig_Scaffold01191       | 61647                          | (C/T)       |
| 33930       | CadSNP9525     | <i>Desi</i>      | Ca_Desig_Scaffold01191       | 61641                          | (C/T)       |
| 33931       | CadSNP9526     | <i>Desi</i>      | Ca_Desig_Scaffold01191       | 61639                          | (G/A)       |
| 33932       | CadSNP9527     | <i>Desi</i>      | Ca_Desig_Scaffold01191       | 61631                          | (C/T)       |
| 33933       | CadSNP9528     | <i>Desi</i>      | Ca_Desig_Scaffold01191       | 72296                          | (A/G)       |

| <b>S.N.</b> | <b>SNP IDs</b> | <b>Cultivars</b> | <b>Chromosomes/scaffolds</b> | <b>Physical positions (bp)</b> | <b>SNPs</b> |
|-------------|----------------|------------------|------------------------------|--------------------------------|-------------|
| 33934       | CadSNP9529     | <i>Desi</i>      | Ca_Desig_Scaffold01191       | 72446                          | (G/A)       |
| 33935       | CadSNP9530     | <i>Desi</i>      | Ca_Desig_Scaffold01191       | 75429                          | (T/C)       |
| 33936       | CadSNP9531     | <i>Desi</i>      | Ca_Desig_Scaffold01191       | 75505                          | (C/T)       |
| 33937       | CadSNP9532     | <i>Desi</i>      | Ca_Desig_Scaffold01191       | 75493                          | (G/A)       |
| 33938       | CadSNP9533     | <i>Desi</i>      | Ca_Desig_Scaffold01191       | 75490                          | (T/C)       |
| 33939       | CadSNP9534     | <i>Desi</i>      | Ca_Desig_Scaffold01191       | 75487                          | (T/A)       |
| 33940       | CadSNP9535     | <i>Desi</i>      | Ca_Desig_Scaffold01193       | 31644                          | (G/A)       |
| 33941       | CadSNP9536     | <i>Desi</i>      | Ca_Desig_Scaffold01194       | 39177                          | (A/G)       |
| 33942       | CadSNP9537     | <i>Desi</i>      | Ca_Desig_Scaffold01194       | 71452                          | (T/A)       |
| 33943       | CadSNP9538     | <i>Desi</i>      | Ca_Desig_Scaffold01194       | 78496                          | (C/A)       |
| 33944       | CadSNP9539     | <i>Desi</i>      | Ca_Desig_Scaffold01198       | 5480                           | (A/C)       |
| 33945       | CadSNP9540     | <i>Desi</i>      | Ca_Desig_Scaffold01198       | 54170                          | (T/G)       |
| 33946       | CadSNP9541     | <i>Desi</i>      | Ca_Desig_Scaffold01198       | 54156                          | (C/T)       |
| 33947       | CadSNP9542     | <i>Desi</i>      | Ca_Desig_Scaffold01198       | 54138                          | (T/G)       |
| 33948       | CadSNP9543     | <i>Desi</i>      | Ca_Desig_Scaffold01200       | 32313                          | (A/G)       |
| 33949       | CadSNP9544     | <i>Desi</i>      | Ca_Desig_Scaffold01200       | 81274                          | (A/T)       |
| 33950       | CadSNP9545     | <i>Desi</i>      | Ca_Desig_Scaffold01201       | 11290                          | (A/G)       |
| 33951       | CadSNP9546     | <i>Desi</i>      | Ca_Desig_Scaffold01207       | 62262                          | (G/T)       |
| 33952       | CadSNP9547     | <i>Desi</i>      | Ca_Desig_Scaffold01207       | 62361                          | (T/A)       |
| 33953       | CadSNP9548     | <i>Desi</i>      | Ca_Desig_Scaffold01207       | 62312                          | (T/C)       |
| 33954       | CadSNP9549     | <i>Desi</i>      | Ca_Desig_Scaffold01208       | 37318                          | (C/T)       |
| 33955       | CadSNP9550     | <i>Desi</i>      | Ca_Desig_Scaffold01208       | 46725                          | (A/C)       |
| 33956       | CadSNP9551     | <i>Desi</i>      | Ca_Desig_Scaffold01208       | 48445                          | (C/T)       |
| 33957       | CadSNP9552     | <i>Desi</i>      | Ca_Desig_Scaffold01210       | 42827                          | (G/T)       |
| 33958       | CadSNP9553     | <i>Desi</i>      | Ca_Desig_Scaffold01210       | 84904                          | (C/G)       |
| 33959       | CadSNP9554     | <i>Desi</i>      | Ca_Desig_Scaffold01211       | 19129                          | (T/C)       |
| 33960       | CadSNP9555     | <i>Desi</i>      | Ca_Desig_Scaffold01211       | 19163                          | (C/A)       |
| 33961       | CadSNP9556     | <i>Desi</i>      | Ca_Desig_Scaffold01211       | 65327                          | (C/T)       |
| 33962       | CadSNP9557     | <i>Desi</i>      | Ca_Desig_Scaffold01213       | 31897                          | (A/C)       |
| 33963       | CadSNP9558     | <i>Desi</i>      | Ca_Desig_Scaffold01213       | 58439                          | (C/T)       |
| 33964       | CadSNP9559     | <i>Desi</i>      | Ca_Desig_Scaffold01216       | 47446                          | (G/A)       |
| 33965       | CadSNP9560     | <i>Desi</i>      | Ca_Desig_Scaffold01216       | 47480                          | (T/C)       |
| 33966       | CadSNP9561     | <i>Desi</i>      | Ca_Desig_Scaffold01216       | 47600                          | (T/A)       |
| 33967       | CadSNP9562     | <i>Desi</i>      | Ca_Desig_Scaffold01216       | 47561                          | (A/G)       |
| 33968       | CadSNP9563     | <i>Desi</i>      | Ca_Desig_Scaffold01216       | 62521                          | (T/C)       |
| 33969       | CadSNP9564     | <i>Desi</i>      | Ca_Desig_Scaffold01218       | 31762                          | (G/T)       |
| 33970       | CadSNP9565     | <i>Desi</i>      | Ca_Desig_Scaffold01218       | 34440                          | (C/T)       |
| 33971       | CadSNP9566     | <i>Desi</i>      | Ca_Desig_Scaffold01218       | 34433                          | (C/T)       |



| <b>S.N.</b> | <b>SNP IDs</b> | <b>Cultivars</b> | <b>Chromosomes/scaffolds</b> | <b>Physical positions (bp)</b> | <b>SNPs</b> |
|-------------|----------------|------------------|------------------------------|--------------------------------|-------------|
| 33972       | CadSNP9567     | <i>Desi</i>      | Ca_Desig_Scaffold01218       | 59068                          | (A/C)       |
| 33973       | CadSNP9568     | <i>Desi</i>      | Ca_Desig_Scaffold01225       | 77159                          | (C/G)       |
| 33974       | CadSNP9569     | <i>Desi</i>      | Ca_Desig_Scaffold01225       | 77233                          | (A/G)       |
| 33975       | CadSNP9570     | <i>Desi</i>      | Ca_Desig_Scaffold01226       | 35473                          | (T/C)       |
| 33976       | CadSNP9571     | <i>Desi</i>      | Ca_Desig_Scaffold01226       | 35502                          | (G/T)       |
| 33977       | CadSNP9572     | <i>Desi</i>      | Ca_Desig_Scaffold01226       | 45419                          | (C/T)       |
| 33978       | CadSNP9573     | <i>Desi</i>      | Ca_Desig_Scaffold01226       | 81297                          | (C/T)       |
| 33979       | CadSNP9574     | <i>Desi</i>      | Ca_Desig_Scaffold01226       | 82899                          | (G/A)       |
| 33980       | CadSNP9575     | <i>Desi</i>      | Ca_Desig_Scaffold01226       | 83176                          | (T/C)       |
| 33981       | CadSNP9576     | <i>Desi</i>      | Ca_Desig_Scaffold01226       | 83148                          | (A/C)       |
| 33982       | CadSNP9577     | <i>Desi</i>      | Ca_Desig_Scaffold01229       | 17527                          | (G/C)       |
| 33983       | CadSNP9578     | <i>Desi</i>      | Ca_Desig_Scaffold01229       | 20555                          | (A/C)       |
| 33984       | CadSNP9579     | <i>Desi</i>      | Ca_Desig_Scaffold01229       | 20562                          | (T/A)       |
| 33985       | CadSNP9580     | <i>Desi</i>      | Ca_Desig_Scaffold01229       | 20567                          | (G/A)       |
| 33986       | CadSNP9581     | <i>Desi</i>      | Ca_Desig_Scaffold01229       | 20597                          | (G/A)       |
| 33987       | CadSNP9582     | <i>Desi</i>      | Ca_Desig_Scaffold01229       | 20609                          | (T/G)       |
| 33988       | CadSNP9583     | <i>Desi</i>      | Ca_Desig_Scaffold01230       | 4847                           | (C/G)       |
| 33989       | CadSNP9584     | <i>Desi</i>      | Ca_Desig_Scaffold01230       | 4806                           | (G/A)       |
| 33990       | CadSNP9585     | <i>Desi</i>      | Ca_Desig_Scaffold01230       | 4814                           | (A/C)       |
| 33991       | CadSNP9586     | <i>Desi</i>      | Ca_Desig_Scaffold01230       | 4822                           | (G/A)       |
| 33992       | CadSNP9587     | <i>Desi</i>      | Ca_Desig_Scaffold01230       | 4823                           | (C/T)       |
| 33993       | CadSNP9588     | <i>Desi</i>      | Ca_Desig_Scaffold01230       | 4915                           | (T/C)       |
| 33994       | CadSNP9589     | <i>Desi</i>      | Ca_Desig_Scaffold01230       | 10618                          | (A/G)       |
| 33995       | CadSNP9590     | <i>Desi</i>      | Ca_Desig_Scaffold01231       | 77445                          | (C/T)       |
| 33996       | CadSNP9591     | <i>Desi</i>      | Ca_Desig_Scaffold01231       | 77529                          | (G/A)       |
| 33997       | CadSNP9592     | <i>Desi</i>      | Ca_Desig_Scaffold01232       | 42512                          | (A/G)       |
| 33998       | CadSNP9593     | <i>Desi</i>      | Ca_Desig_Scaffold01232       | 42514                          | (T/G)       |
| 33999       | CadSNP9594     | <i>Desi</i>      | Ca_Desig_Scaffold01232       | 42528                          | (A/G)       |
| 34000       | CadSNP9595     | <i>Desi</i>      | Ca_Desig_Scaffold01232       | 42529                          | (C/A)       |
| 34001       | CadSNP9596     | <i>Desi</i>      | Ca_Desig_Scaffold01232       | 42555                          | (G/A)       |
| 34002       | CadSNP9597     | <i>Desi</i>      | Ca_Desig_Scaffold01234       | 19961                          | (A/C)       |
| 34003       | CadSNP9598     | <i>Desi</i>      | Ca_Desig_Scaffold01234       | 43462                          | (A/C)       |
| 34004       | CadSNP9599     | <i>Desi</i>      | Ca_Desig_Scaffold01235       | 55390                          | (G/C)       |
| 34005       | CadSNP9600     | <i>Desi</i>      | Ca_Desig_Scaffold01235       | 55417                          | (G/C)       |
| 34006       | CadSNP9601     | <i>Desi</i>      | Ca_Desig_Scaffold01236       | 65369                          | (T/G)       |
| 34007       | CadSNP9602     | <i>Desi</i>      | Ca_Desig_Scaffold01236       | 182660                         | (A/G)       |
| 34008       | CadSNP9603     | <i>Desi</i>      | Ca_Desig_Scaffold01236       | 182812                         | (G/A)       |
| 34009       | CadSNP9604     | <i>Desi</i>      | Ca_Desig_Scaffold01236       | 196844                         | (T/C)       |

| <b>S.N.</b> | <b>SNP IDs</b> | <b>Cultivars</b> | <b>Chromosomes/scaffolds</b> | <b>Physical positions (bp)</b> | <b>SNPs</b> |
|-------------|----------------|------------------|------------------------------|--------------------------------|-------------|
| 34010       | CadSNP9605     | <i>Desi</i>      | Ca_Desig_Scaffold01236       | 338504                         | (C/T)       |
| 34011       | CadSNP9606     | <i>Desi</i>      | Ca_Desig_Scaffold01236       | 434162                         | (T/G)       |
| 34012       | CadSNP9607     | <i>Desi</i>      | Ca_Desig_Scaffold01236       | 440001                         | (G/A)       |
| 34013       | CadSNP9608     | <i>Desi</i>      | Ca_Desig_Scaffold01236       | 532555                         | (A/C)       |
| 34014       | CadSNP9609     | <i>Desi</i>      | Ca_Desig_Scaffold01236       | 576787                         | (T/G)       |
| 34015       | CadSNP9610     | <i>Desi</i>      | Ca_Desig_Scaffold01236       | 576825                         | (T/G)       |
| 34016       | CadSNP9611     | <i>Desi</i>      | Ca_Desig_Scaffold01236       | 576826                         | (G/A)       |
| 34017       | CadSNP9612     | <i>Desi</i>      | Ca_Desig_Scaffold01236       | 576834                         | (G/A)       |
| 34018       | CadSNP9613     | <i>Desi</i>      | Ca_Desig_Scaffold01236       | 577619                         | (A/T)       |
| 34019       | CadSNP9614     | <i>Desi</i>      | Ca_Desig_Scaffold01236       | 577705                         | (A/T)       |
| 34020       | CadSNP9615     | <i>Desi</i>      | Ca_Desig_Scaffold01237       | 18876                          | (G/A)       |
| 34021       | CadSNP9616     | <i>Desi</i>      | Ca_Desig_Scaffold01237       | 19544                          | (C/G)       |
| 34022       | CadSNP9617     | <i>Desi</i>      | Ca_Desig_Scaffold01237       | 25073                          | (G/A)       |
| 34023       | CadSNP9618     | <i>Desi</i>      | Ca_Desig_Scaffold01237       | 25084                          | (T/C)       |
| 34024       | CadSNP9619     | <i>Desi</i>      | Ca_Desig_Scaffold01237       | 25109                          | (C/T)       |
| 34025       | CadSNP9620     | <i>Desi</i>      | Ca_Desig_Scaffold01237       | 25097                          | (C/A)       |
| 34026       | CadSNP9621     | <i>Desi</i>      | Ca_Desig_Scaffold01239       | 40213                          | (T/C)       |
| 34027       | CadSNP9622     | <i>Desi</i>      | Ca_Desig_Scaffold01241       | 25391                          | (G/A)       |
| 34028       | CadSNP9623     | <i>Desi</i>      | Ca_Desig_Scaffold01241       | 74524                          | (A/G)       |
| 34029       | CadSNP9624     | <i>Desi</i>      | Ca_Desig_Scaffold01242       | 8426                           | (G/A)       |
| 34030       | CadSNP9625     | <i>Desi</i>      | Ca_Desig_Scaffold01242       | 14586                          | (G/A)       |
| 34031       | CadSNP9626     | <i>Desi</i>      | Ca_Desig_Scaffold01242       | 52850                          | (C/A)       |
| 34032       | CadSNP9627     | <i>Desi</i>      | Ca_Desig_Scaffold01242       | 52830                          | (A/G)       |
| 34033       | CadSNP9628     | <i>Desi</i>      | Ca_Desig_Scaffold01244       | 7664                           | (G/A)       |
| 34034       | CadSNP9629     | <i>Desi</i>      | Ca_Desig_Scaffold01245       | 68014                          | (T/C)       |
| 34035       | CadSNP9630     | <i>Desi</i>      | Ca_Desig_Scaffold01245       | 68046                          | (T/C)       |
| 34036       | CadSNP9631     | <i>Desi</i>      | Ca_Desig_Scaffold01245       | 68138                          | (C/T)       |
| 34037       | CadSNP9632     | <i>Desi</i>      | Ca_Desig_Scaffold01245       | 70478                          | (A/G)       |
| 34038       | CadSNP9633     | <i>Desi</i>      | Ca_Desig_Scaffold01245       | 70566                          | (A/G)       |
| 34039       | CadSNP9634     | <i>Desi</i>      | Ca_Desig_Scaffold01246       | 32256                          | (T/A)       |
| 34040       | CadSNP9635     | <i>Desi</i>      | Ca_Desig_Scaffold01246       | 32195                          | (G/T)       |
| 34041       | CadSNP9636     | <i>Desi</i>      | Ca_Desig_Scaffold01246       | 61133                          | (G/T)       |
| 34042       | CadSNP9637     | <i>Desi</i>      | Ca_Desig_Scaffold01247       | 52151                          | (G/T)       |
| 34043       | CadSNP9638     | <i>Desi</i>      | Ca_Desig_Scaffold01247       | 105597                         | (C/G)       |
| 34044       | CadSNP9639     | <i>Desi</i>      | Ca_Desig_Scaffold01250       | 65931                          | (G/T)       |
| 34045       | CadSNP9640     | <i>Desi</i>      | Ca_Desig_Scaffold01251       | 45771                          | (A/C)       |
| 34046       | CadSNP9641     | <i>Desi</i>      | Ca_Desig_Scaffold01251       | 45868                          | (C/A)       |
| 34047       | CadSNP9642     | <i>Desi</i>      | Ca_Desig_Scaffold01251       | 46001                          | (G/A)       |

| <b>S.N.</b> | <b>SNP IDs</b> | <b>Cultivars</b> | <b>Chromosomes/scaffolds</b> | <b>Physical positions (bp)</b> | <b>SNPs</b> |
|-------------|----------------|------------------|------------------------------|--------------------------------|-------------|
| 34048       | CadSNP9643     | <i>Desi</i>      | Ca_Desig_Scaffold01251       | 49508                          | (C/T)       |
| 34049       | CadSNP9644     | <i>Desi</i>      | Ca_Desig_Scaffold01253       | 2934                           | (T/G)       |
| 34050       | CadSNP9645     | <i>Desi</i>      | Ca_Desig_Scaffold01253       | 21277                          | (C/G)       |
| 34051       | CadSNP9646     | <i>Desi</i>      | Ca_Desig_Scaffold01253       | 21324                          | (A/T)       |
| 34052       | CadSNP9647     | <i>Desi</i>      | Ca_Desig_Scaffold01253       | 21338                          | (T/G)       |
| 34053       | CadSNP9648     | <i>Desi</i>      | Ca_Desig_Scaffold01253       | 21348                          | (G/C)       |
| 34054       | CadSNP9649     | <i>Desi</i>      | Ca_Desig_Scaffold01254       | 54262                          | (A/T)       |
| 34055       | CadSNP9650     | <i>Desi</i>      | Ca_Desig_Scaffold01257       | 52914                          | (C/A)       |
| 34056       | CadSNP9651     | <i>Desi</i>      | Ca_Desig_Scaffold01257       | 52915                          | (A/G)       |
| 34057       | CadSNP9652     | <i>Desi</i>      | Ca_Desig_Scaffold01258       | 30943                          | (C/G)       |
| 34058       | CadSNP9653     | <i>Desi</i>      | Ca_Desig_Scaffold01258       | 79543                          | (C/T)       |
| 34059       | CadSNP9654     | <i>Desi</i>      | Ca_Desig_Scaffold01258       | 79546                          | (G/A)       |
| 34060       | CadSNP9655     | <i>Desi</i>      | Ca_Desig_Scaffold01258       | 79571                          | (C/A)       |
| 34061       | CadSNP9656     | <i>Desi</i>      | Ca_Desig_Scaffold01258       | 79572                          | (G/C)       |
| 34062       | CadSNP9657     | <i>Desi</i>      | Ca_Desig_Scaffold01258       | 79601                          | (C/A)       |
| 34063       | CadSNP9658     | <i>Desi</i>      | Ca_Desig_Scaffold01258       | 79658                          | (G/A)       |
| 34064       | CadSNP9659     | <i>Desi</i>      | Ca_Desig_Scaffold01258       | 79655                          | (G/T)       |
| 34065       | CadSNP9660     | <i>Desi</i>      | Ca_Desig_Scaffold01258       | 79643                          | (T/A)       |
| 34066       | CadSNP9661     | <i>Desi</i>      | Ca_Desig_Scaffold01258       | 80323                          | (T/C)       |
| 34067       | CadSNP9662     | <i>Desi</i>      | Ca_Desig_Scaffold01260       | 80684                          | (A/C)       |
| 34068       | CadSNP9663     | <i>Desi</i>      | Ca_Desig_Scaffold01262       | 53567                          | (C/A)       |
| 34069       | CadSNP9664     | <i>Desi</i>      | Ca_Desig_Scaffold01262       | 53659                          | (C/T)       |
| 34070       | CadSNP9665     | <i>Desi</i>      | Ca_Desig_Scaffold01264       | 118715                         | (G/A)       |
| 34071       | CadSNP9666     | <i>Desi</i>      | Ca_Desig_Scaffold01266       | 35105                          | (C/T)       |
| 34072       | CadSNP9667     | <i>Desi</i>      | Ca_Desig_Scaffold01276       | 4517                           | (G/A)       |
| 34073       | CadSNP9668     | <i>Desi</i>      | Ca_Desig_Scaffold01276       | 27994                          | (T/G)       |
| 34074       | CadSNP9669     | <i>Desi</i>      | Ca_Desig_Scaffold01276       | 28051                          | (G/A)       |
| 34075       | CadSNP9670     | <i>Desi</i>      | Ca_Desig_Scaffold01276       | 28033                          | (T/C)       |
| 34076       | CadSNP9671     | <i>Desi</i>      | Ca_Desig_Scaffold01276       | 28015                          | (G/A)       |
| 34077       | CadSNP9672     | <i>Desi</i>      | Ca_Desig_Scaffold01280       | 1792                           | (C/T)       |
| 34078       | CadSNP9673     | <i>Desi</i>      | Ca_Desig_Scaffold01282       | 47488                          | (G/A)       |
| 34079       | CadSNP9674     | <i>Desi</i>      | Ca_Desig_Scaffold01282       | 48118                          | (T/C)       |
| 34080       | CadSNP9675     | <i>Desi</i>      | Ca_Desig_Scaffold01282       | 75715                          | (T/G)       |
| 34081       | CadSNP9676     | <i>Desi</i>      | Ca_Desig_Scaffold01282       | 75655                          | (C/T)       |
| 34082       | CadSNP9677     | <i>Desi</i>      | Ca_Desig_Scaffold01282       | 75640                          | (C/T)       |
| 34083       | CadSNP9678     | <i>Desi</i>      | Ca_Desig_Scaffold01285       | 49880                          | (A/C)       |
| 34084       | CadSNP9679     | <i>Desi</i>      | Ca_Desig_Scaffold01285       | 49875                          | (C/T)       |
| 34085       | CadSNP9680     | <i>Desi</i>      | Ca_Desig_Scaffold01285       | 49863                          | (G/C)       |

| <b>S.N.</b> | <b>SNP IDs</b> | <b>Cultivars</b> | <b>Chromosomes/scaffolds</b> | <b>Physical positions (bp)</b> | <b>SNPs</b> |
|-------------|----------------|------------------|------------------------------|--------------------------------|-------------|
| 34086       | CadSNP9681     | <i>Desi</i>      | Ca_Desig_Scaffold01285       | 49859                          | (C/A)       |
| 34087       | CadSNP9682     | <i>Desi</i>      | Ca_Desig_Scaffold01288       | 16788                          | (G/A)       |
| 34088       | CadSNP9683     | <i>Desi</i>      | Ca_Desig_Scaffold01288       | 16786                          | (G/A)       |
| 34089       | CadSNP9684     | <i>Desi</i>      | Ca_Desig_Scaffold01288       | 16780                          | (A/G)       |
| 34090       | CadSNP9685     | <i>Desi</i>      | Ca_Desig_Scaffold01288       | 17692                          | (A/G)       |
| 34091       | CadSNP9686     | <i>Desi</i>      | Ca_Desig_Scaffold01288       | 17933                          | (A/T)       |
| 34092       | CadSNP9687     | <i>Desi</i>      | Ca_Desig_Scaffold01289       | 7943                           | (A/T)       |
| 34093       | CadSNP9688     | <i>Desi</i>      | Ca_Desig_Scaffold01289       | 27140                          | (A/G)       |
| 34094       | CadSNP9689     | <i>Desi</i>      | Ca_Desig_Scaffold01289       | 27150                          | (T/A)       |
| 34095       | CadSNP9690     | <i>Desi</i>      | Ca_Desig_Scaffold01289       | 42358                          | (A/G)       |
| 34096       | CadSNP9691     | <i>Desi</i>      | Ca_Desig_Scaffold01289       | 42388                          | (C/G)       |
| 34097       | CadSNP9692     | <i>Desi</i>      | Ca_Desig_Scaffold01289       | 42669                          | (T/A)       |
| 34098       | CadSNP9693     | <i>Desi</i>      | Ca_Desig_Scaffold01289       | 51956                          | (T/C)       |
| 34099       | CadSNP9694     | <i>Desi</i>      | Ca_Desig_Scaffold01289       | 79148                          | (T/C)       |
| 34100       | CadSNP9695     | <i>Desi</i>      | Ca_Desig_Scaffold01289       | 79287                          | (C/T)       |
| 34101       | CadSNP9696     | <i>Desi</i>      | Ca_Desig_Scaffold01290       | 25520                          | (T/G)       |
| 34102       | CadSNP9697     | <i>Desi</i>      | Ca_Desig_Scaffold01290       | 25522                          | (A/G)       |
| 34103       | CadSNP9698     | <i>Desi</i>      | Ca_Desig_Scaffold01290       | 25654                          | (G/A)       |
| 34104       | CadSNP9699     | <i>Desi</i>      | Ca_Desig_Scaffold01290       | 25662                          | (G/A)       |
| 34105       | CadSNP9700     | <i>Desi</i>      | Ca_Desig_Scaffold01290       | 25671                          | (G/A)       |
| 34106       | CadSNP9701     | <i>Desi</i>      | Ca_Desig_Scaffold01290       | 25673                          | (C/A)       |
| 34107       | CadSNP9702     | <i>Desi</i>      | Ca_Desig_Scaffold01290       | 29546                          | (A/C)       |
| 34108       | CadSNP9703     | <i>Desi</i>      | Ca_Desig_Scaffold01290       | 33887                          | (C/A)       |
| 34109       | CadSNP9704     | <i>Desi</i>      | Ca_Desig_Scaffold01290       | 33898                          | (G/A)       |
| 34110       | CadSNP9705     | <i>Desi</i>      | Ca_Desig_Scaffold01290       | 33913                          | (C/T)       |
| 34111       | CadSNP9706     | <i>Desi</i>      | Ca_Desig_Scaffold01290       | 41347                          | (A/G)       |
| 34112       | CadSNP9707     | <i>Desi</i>      | Ca_Desig_Scaffold01291       | 29063                          | (C/T)       |
| 34113       | CadSNP9708     | <i>Desi</i>      | Ca_Desig_Scaffold01291       | 29089                          | (G/A)       |
| 34114       | CadSNP9709     | <i>Desi</i>      | Ca_Desig_Scaffold01291       | 44891                          | (T/C)       |
| 34115       | CadSNP9710     | <i>Desi</i>      | Ca_Desig_Scaffold01291       | 45277                          | (T/G)       |
| 34116       | CadSNP9711     | <i>Desi</i>      | Ca_Desig_Scaffold01291       | 46762                          | (A/G)       |
| 34117       | CadSNP9712     | <i>Desi</i>      | Ca_Desig_Scaffold01291       | 70381                          | (G/A)       |
| 34118       | CadSNP9713     | <i>Desi</i>      | Ca_Desig_Scaffold01292       | 51660                          | (G/A)       |
| 34119       | CadSNP9714     | <i>Desi</i>      | Ca_Desig_Scaffold01292       | 73208                          | (G/A)       |
| 34120       | CadSNP9715     | <i>Desi</i>      | Ca_Desig_Scaffold01296       | 9310                           | (C/A)       |
| 34121       | CadSNP9716     | <i>Desi</i>      | Ca_Desig_Scaffold01296       | 12593                          | (A/G)       |
| 34122       | CadSNP9717     | <i>Desi</i>      | Ca_Desig_Scaffold01296       | 12626                          | (A/G)       |
| 34123       | CadSNP9718     | <i>Desi</i>      | Ca_Desig_Scaffold01296       | 12900                          | (T/A)       |

| <b>S.N.</b> | <b>SNP IDs</b> | <b>Cultivars</b> | <b>Chromosomes/scaffolds</b> | <b>Physical positions (bp)</b> | <b>SNPs</b> |
|-------------|----------------|------------------|------------------------------|--------------------------------|-------------|
| 34124       | CadSNP9719     | <i>Desi</i>      | Ca_Desig_Scaffold01296       | 13845                          | (A/G)       |
| 34125       | CadSNP9720     | <i>Desi</i>      | Ca_Desig_Scaffold01296       | 13802                          | (G/A)       |
| 34126       | CadSNP9721     | <i>Desi</i>      | Ca_Desig_Scaffold01296       | 13800                          | (G/A)       |
| 34127       | CadSNP9722     | <i>Desi</i>      | Ca_Desig_Scaffold01297       | 7239                           | (C/T)       |
| 34128       | CadSNP9723     | <i>Desi</i>      | Ca_Desig_Scaffold01297       | 7244                           | (A/C)       |
| 34129       | CadSNP9724     | <i>Desi</i>      | Ca_Desig_Scaffold01297       | 7248                           | (C/T)       |
| 34130       | CadSNP9725     | <i>Desi</i>      | Ca_Desig_Scaffold01297       | 7341                           | (G/T)       |
| 34131       | CadSNP9726     | <i>Desi</i>      | Ca_Desig_Scaffold01297       | 17121                          | (C/T)       |
| 34132       | CadSNP9727     | <i>Desi</i>      | Ca_Desig_Scaffold01297       | 17371                          | (C/A)       |
| 34133       | CadSNP9728     | <i>Desi</i>      | Ca_Desig_Scaffold01297       | 17433                          | (A/G)       |
| 34134       | CadSNP9729     | <i>Desi</i>      | Ca_Desig_Scaffold01297       | 46499                          | (A/C)       |
| 34135       | CadSNP9730     | <i>Desi</i>      | Ca_Desig_Scaffold01306       | 71177                          | (A/G)       |
| 34136       | CadSNP9731     | <i>Desi</i>      | Ca_Desig_Scaffold01310       | 32838                          | (G/C)       |
| 34137       | CadSNP9732     | <i>Desi</i>      | Ca_Desig_Scaffold01310       | 32888                          | (C/T)       |
| 34138       | CadSNP9733     | <i>Desi</i>      | Ca_Desig_Scaffold01310       | 38405                          | (T/G)       |
| 34139       | CadSNP9734     | <i>Desi</i>      | Ca_Desig_Scaffold01310       | 38409                          | (T/G)       |
| 34140       | CadSNP9735     | <i>Desi</i>      | Ca_Desig_Scaffold01310       | 38414                          | (A/C)       |
| 34141       | CadSNP9736     | <i>Desi</i>      | Ca_Desig_Scaffold01312       | 58574                          | (T/C)       |
| 34142       | CadSNP9737     | <i>Desi</i>      | Ca_Desig_Scaffold01313       | 54011                          | (T/A)       |
| 34143       | CadSNP9738     | <i>Desi</i>      | Ca_Desig_Scaffold01313       | 63262                          | (G/A)       |
| 34144       | CadSNP9739     | <i>Desi</i>      | Ca_Desig_Scaffold01313       | 63242                          | (T/A)       |
| 34145       | CadSNP9740     | <i>Desi</i>      | Ca_Desig_Scaffold01313       | 63401                          | (C/T)       |
| 34146       | CadSNP9741     | <i>Desi</i>      | Ca_Desig_Scaffold01313       | 63388                          | (G/C)       |
| 34147       | CadSNP9742     | <i>Desi</i>      | Ca_Desig_Scaffold01313       | 63353                          | (A/C)       |
| 34148       | CadSNP9743     | <i>Desi</i>      | Ca_Desig_Scaffold01313       | 65675                          | (A/G)       |
| 34149       | CadSNP9744     | <i>Desi</i>      | Ca_Desig_Scaffold01315       | 67964                          | (T/C)       |
| 34150       | CadSNP9745     | <i>Desi</i>      | Ca_Desig_Scaffold01319       | 706                            | (G/A)       |
| 34151       | CadSNP9746     | <i>Desi</i>      | Ca_Desig_Scaffold01319       | 714                            | (A/G)       |
| 34152       | CadSNP9747     | <i>Desi</i>      | Ca_Desig_Scaffold01319       | 726                            | (A/G)       |
| 34153       | CadSNP9748     | <i>Desi</i>      | Ca_Desig_Scaffold01319       | 74585                          | (C/T)       |
| 34154       | CadSNP9749     | <i>Desi</i>      | Ca_Desig_Scaffold01319       | 74583                          | (C/T)       |
| 34155       | CadSNP9750     | <i>Desi</i>      | Ca_Desig_Scaffold01319       | 74574                          | (A/G)       |
| 34156       | CadSNP9751     | <i>Desi</i>      | Ca_Desig_Scaffold01319       | 74546                          | (T/C)       |
| 34157       | CadSNP9752     | <i>Desi</i>      | Ca_Desig_Scaffold01319       | 74533                          | (G/A)       |
| 34158       | CadSNP9753     | <i>Desi</i>      | Ca_Desig_Scaffold01319       | 74523                          | (G/A)       |
| 34159       | CadSNP9754     | <i>Desi</i>      | Ca_Desig_Scaffold01319       | 74520                          | (T/C)       |
| 34160       | CadSNP9755     | <i>Desi</i>      | Ca_Desig_Scaffold01324       | 24240                          | (A/G)       |
| 34161       | CadSNP9756     | <i>Desi</i>      | Ca_Desig_Scaffold01326       | 18720                          | (T/C)       |

| <b>S.N.</b> | <b>SNP IDs</b> | <b>Cultivars</b> | <b>Chromosomes/scaffolds</b> | <b>Physical positions (bp)</b> | <b>SNPs</b> |
|-------------|----------------|------------------|------------------------------|--------------------------------|-------------|
| 34162       | CadSNP9757     | <i>Desi</i>      | Ca_Desig_Scaffold01326       | 27914                          | (G/A)       |
| 34163       | CadSNP9758     | <i>Desi</i>      | Ca_Desig_Scaffold01326       | 30430                          | (A/G)       |
| 34164       | CadSNP9759     | <i>Desi</i>      | Ca_Desig_Scaffold01326       | 30541                          | (G/A)       |
| 34165       | CadSNP9760     | <i>Desi</i>      | Ca_Desig_Scaffold01327       | 19698                          | (C/T)       |
| 34166       | CadSNP9761     | <i>Desi</i>      | Ca_Desig_Scaffold01329       | 67103                          | (C/A)       |
| 34167       | CadSNP9762     | <i>Desi</i>      | Ca_Desig_Scaffold01332       | 58278                          | (C/T)       |
| 34168       | CadSNP9763     | <i>Desi</i>      | Ca_Desig_Scaffold01332       | 58269                          | (A/G)       |
| 34169       | CadSNP9764     | <i>Desi</i>      | Ca_Desig_Scaffold01332       | 58265                          | (G/A)       |
| 34170       | CadSNP9765     | <i>Desi</i>      | Ca_Desig_Scaffold01333       | 163286                         | (A/T)       |
| 34171       | CadSNP9766     | <i>Desi</i>      | Ca_Desig_Scaffold01335       | 64645                          | (C/A)       |
| 34172       | CadSNP9767     | <i>Desi</i>      | Ca_Desig_Scaffold01337       | 22211                          | (C/T)       |
| 34173       | CadSNP9768     | <i>Desi</i>      | Ca_Desig_Scaffold01337       | 28009                          | (A/C)       |
| 34174       | CadSNP9769     | <i>Desi</i>      | Ca_Desig_Scaffold01341       | 12192                          | (T/A)       |
| 34175       | CadSNP9770     | <i>Desi</i>      | Ca_Desig_Scaffold01341       | 12206                          | (T/C)       |
| 34176       | CadSNP9771     | <i>Desi</i>      | Ca_Desig_Scaffold01341       | 12323                          | (A/G)       |
| 34177       | CadSNP9772     | <i>Desi</i>      | Ca_Desig_Scaffold01341       | 12360                          | (A/G)       |
| 34178       | CadSNP9773     | <i>Desi</i>      | Ca_Desig_Scaffold01341       | 27371                          | (C/T)       |
| 34179       | CadSNP9774     | <i>Desi</i>      | Ca_Desig_Scaffold01341       | 27377                          | (T/C)       |
| 34180       | CadSNP9775     | <i>Desi</i>      | Ca_Desig_Scaffold01341       | 47592                          | (G/C)       |
| 34181       | CadSNP9776     | <i>Desi</i>      | Ca_Desig_Scaffold01341       | 47629                          | (A/G)       |
| 34182       | CadSNP9777     | <i>Desi</i>      | Ca_Desig_Scaffold01341       | 47653                          | (T/C)       |
| 34183       | CadSNP9778     | <i>Desi</i>      | Ca_Desig_Scaffold01341       | 54142                          | (C/A)       |
| 34184       | CadSNP9779     | <i>Desi</i>      | Ca_Desig_Scaffold01344       | 28018                          | (T/G)       |
| 34185       | CadSNP9780     | <i>Desi</i>      | Ca_Desig_Scaffold01344       | 28025                          | (G/T)       |
| 34186       | CadSNP9781     | <i>Desi</i>      | Ca_Desig_Scaffold01344       | 28104                          | (A/G)       |
| 34187       | CadSNP9782     | <i>Desi</i>      | Ca_Desig_Scaffold01344       | 37671                          | (G/A)       |
| 34188       | CadSNP9783     | <i>Desi</i>      | Ca_Desig_Scaffold01345       | 24202                          | (A/G)       |
| 34189       | CadSNP9784     | <i>Desi</i>      | Ca_Desig_Scaffold01346       | 38572                          | (G/T)       |
| 34190       | CadSNP9785     | <i>Desi</i>      | Ca_Desig_Scaffold01347       | 72462                          | (C/T)       |
| 34191       | CadSNP9786     | <i>Desi</i>      | Ca_Desig_Scaffold01347       | 72465                          | (A/T)       |
| 34192       | CadSNP9787     | <i>Desi</i>      | Ca_Desig_Scaffold01347       | 81667                          | (G/T)       |
| 34193       | CadSNP9788     | <i>Desi</i>      | Ca_Desig_Scaffold01347       | 81710                          | (T/C)       |
| 34194       | CadSNP9789     | <i>Desi</i>      | Ca_Desig_Scaffold01347       | 93317                          | (G/A)       |
| 34195       | CadSNP9790     | <i>Desi</i>      | Ca_Desig_Scaffold01347       | 93314                          | (A/T)       |
| 34196       | CadSNP9791     | <i>Desi</i>      | Ca_Desig_Scaffold01349       | 31631                          | (A/G)       |
| 34197       | CadSNP9792     | <i>Desi</i>      | Ca_Desig_Scaffold01349       | 61975                          | (T/C)       |
| 34198       | CadSNP9793     | <i>Desi</i>      | Ca_Desig_Scaffold01349       | 62142                          | (A/G)       |
| 34199       | CadSNP9794     | <i>Desi</i>      | Ca_Desig_Scaffold01349       | 62157                          | (T/A)       |

| <b>S.N.</b> | <b>SNP IDs</b> | <b>Cultivars</b> | <b>Chromosomes/scaffolds</b> | <b>Physical positions (bp)</b> | <b>SNPs</b> |
|-------------|----------------|------------------|------------------------------|--------------------------------|-------------|
| 34200       | CadSNP9795     | <i>Desi</i>      | Ca_Desig_Scaffold01354       | 7270                           | (C/A)       |
| 34201       | CadSNP9796     | <i>Desi</i>      | Ca_Desig_Scaffold01354       | 7303                           | (T/C)       |
| 34202       | CadSNP9797     | <i>Desi</i>      | Ca_Desig_Scaffold01354       | 64199                          | (A/G)       |
| 34203       | CadSNP9798     | <i>Desi</i>      | Ca_Desig_Scaffold01354       | 64202                          | (T/A)       |
| 34204       | CadSNP9799     | <i>Desi</i>      | Ca_Desig_Scaffold01354       | 64262                          | (A/T)       |
| 34205       | CadSNP9800     | <i>Desi</i>      | Ca_Desig_Scaffold01354       | 64767                          | (T/A)       |
| 34206       | CadSNP9801     | <i>Desi</i>      | Ca_Desig_Scaffold01355       | 43920                          | (A/G)       |
| 34207       | CadSNP9802     | <i>Desi</i>      | Ca_Desig_Scaffold01356       | 65978                          | (T/C)       |
| 34208       | CadSNP9803     | <i>Desi</i>      | Ca_Desig_Scaffold01356       | 65981                          | (T/C)       |
| 34209       | CadSNP9804     | <i>Desi</i>      | Ca_Desig_Scaffold01357       | 44633                          | (C/A)       |
| 34210       | CadSNP9805     | <i>Desi</i>      | Ca_Desig_Scaffold01358       | 11100                          | (A/G)       |
| 34211       | CadSNP9806     | <i>Desi</i>      | Ca_Desig_Scaffold01359       | 8558                           | (A/C)       |
| 34212       | CadSNP9807     | <i>Desi</i>      | Ca_Desig_Scaffold01361       | 69013                          | (A/T)       |
| 34213       | CadSNP9808     | <i>Desi</i>      | Ca_Desig_Scaffold01365       | 50289                          | (G/T)       |
| 34214       | CadSNP9809     | <i>Desi</i>      | Ca_Desig_Scaffold01365       | 67835                          | (C/T)       |
| 34215       | CadSNP9810     | <i>Desi</i>      | Ca_Desig_Scaffold01365       | 67839                          | (T/C)       |
| 34216       | CadSNP9811     | <i>Desi</i>      | Ca_Desig_Scaffold01365       | 67841                          | (A/C)       |
| 34217       | CadSNP9812     | <i>Desi</i>      | Ca_Desig_Scaffold01368       | 66942                          | (C/T)       |
| 34218       | CadSNP9813     | <i>Desi</i>      | Ca_Desig_Scaffold01369       | 69754                          | (G/A)       |
| 34219       | CadSNP9814     | <i>Desi</i>      | Ca_Desig_Scaffold01372       | 23756                          | (T/C)       |
| 34220       | CadSNP9815     | <i>Desi</i>      | Ca_Desig_Scaffold01372       | 23796                          | (A/G)       |
| 34221       | CadSNP9816     | <i>Desi</i>      | Ca_Desig_Scaffold01372       | 24083                          | (A/G)       |
| 34222       | CadSNP9817     | <i>Desi</i>      | Ca_Desig_Scaffold01372       | 26659                          | (T/C)       |
| 34223       | CadSNP9818     | <i>Desi</i>      | Ca_Desig_Scaffold01372       | 26677                          | (G/A)       |
| 34224       | CadSNP9819     | <i>Desi</i>      | Ca_Desig_Scaffold01372       | 26680                          | (G/A)       |
| 34225       | CadSNP9820     | <i>Desi</i>      | Ca_Desig_Scaffold01372       | 26751                          | (A/T)       |
| 34226       | CadSNP9821     | <i>Desi</i>      | Ca_Desig_Scaffold01372       | 27350                          | (A/C)       |
| 34227       | CadSNP9822     | <i>Desi</i>      | Ca_Desig_Scaffold01372       | 50036                          | (C/T)       |
| 34228       | CadSNP9823     | <i>Desi</i>      | Ca_Desig_Scaffold01374       | 67095                          | (T/C)       |
| 34229       | CadSNP9824     | <i>Desi</i>      | Ca_Desig_Scaffold01374       | 67162                          | (A/T)       |
| 34230       | CadSNP9825     | <i>Desi</i>      | Ca_Desig_Scaffold01374       | 73668                          | (C/T)       |
| 34231       | CadSNP9826     | <i>Desi</i>      | Ca_Desig_Scaffold01375       | 46182                          | (G/A)       |
| 34232       | CadSNP9827     | <i>Desi</i>      | Ca_Desig_Scaffold01376       | 27474                          | (T/C)       |
| 34233       | CadSNP9828     | <i>Desi</i>      | Ca_Desig_Scaffold01376       | 27492                          | (T/C)       |
| 34234       | CadSNP9829     | <i>Desi</i>      | Ca_Desig_Scaffold01376       | 51851                          | (T/C)       |
| 34235       | CadSNP9830     | <i>Desi</i>      | Ca_Desig_Scaffold01376       | 51885                          | (G/C)       |
| 34236       | CadSNP9831     | <i>Desi</i>      | Ca_Desig_Scaffold01376       | 58703                          | (T/C)       |
| 34237       | CadSNP9832     | <i>Desi</i>      | Ca_Desig_Scaffold01376       | 58737                          | (G/C)       |

| <b>S.N.</b> | <b>SNP IDs</b> | <b>Cultivars</b> | <b>Chromosomes/scaffolds</b> | <b>Physical positions (bp)</b> | <b>SNPs</b> |
|-------------|----------------|------------------|------------------------------|--------------------------------|-------------|
| 34238       | CadSNP9833     | <i>Desi</i>      | Ca_Desig_Scaffold01380       | 36047                          | (T/G)       |
| 34239       | CadSNP9834     | <i>Desi</i>      | Ca_Desig_Scaffold01383       | 23063                          | (T/A)       |
| 34240       | CadSNP9835     | <i>Desi</i>      | Ca_Desig_Scaffold01383       | 43410                          | (A/G)       |
| 34241       | CadSNP9836     | <i>Desi</i>      | Ca_Desig_Scaffold01383       | 43613                          | (G/C)       |
| 34242       | CadSNP9837     | <i>Desi</i>      | Ca_Desig_Scaffold01385       | 228376                         | (C/A)       |
| 34243       | CadSNP9838     | <i>Desi</i>      | Ca_Desig_Scaffold01387       | 33651                          | (T/C)       |
| 34244       | CadSNP9839     | <i>Desi</i>      | Ca_Desig_Scaffold01388       | 49117                          | (T/A)       |
| 34245       | CadSNP9840     | <i>Desi</i>      | Ca_Desig_Scaffold01389       | 10306                          | (C/T)       |
| 34246       | CadSNP9841     | <i>Desi</i>      | Ca_Desig_Scaffold01390       | 18103                          | (A/G)       |
| 34247       | CadSNP9842     | <i>Desi</i>      | Ca_Desig_Scaffold01390       | 18089                          | (G/A)       |
| 34248       | CadSNP9843     | <i>Desi</i>      | Ca_Desig_Scaffold01390       | 18085                          | (A/G)       |
| 34249       | CadSNP9844     | <i>Desi</i>      | Ca_Desig_Scaffold01390       | 21690                          | (T/A)       |
| 34250       | CadSNP9845     | <i>Desi</i>      | Ca_Desig_Scaffold01390       | 21743                          | (A/T)       |
| 34251       | CadSNP9846     | <i>Desi</i>      | Ca_Desig_Scaffold01390       | 21748                          | (C/T)       |
| 34252       | CadSNP9847     | <i>Desi</i>      | Ca_Desig_Scaffold01392       | 3705                           | (G/A)       |
| 34253       | CadSNP9848     | <i>Desi</i>      | Ca_Desig_Scaffold01392       | 3723                           | (T/A)       |
| 34254       | CadSNP9849     | <i>Desi</i>      | Ca_Desig_Scaffold01392       | 3748                           | (C/G)       |
| 34255       | CadSNP9850     | <i>Desi</i>      | Ca_Desig_Scaffold01392       | 3758                           | (C/T)       |
| 34256       | CadSNP9851     | <i>Desi</i>      | Ca_Desig_Scaffold01392       | 47703                          | (C/T)       |
| 34257       | CadSNP9852     | <i>Desi</i>      | Ca_Desig_Scaffold01392       | 47670                          | (A/G)       |
| 34258       | CadSNP9853     | <i>Desi</i>      | Ca_Desig_Scaffold01392       | 55527                          | (A/G)       |
| 34259       | CadSNP9854     | <i>Desi</i>      | Ca_Desig_Scaffold01392       | 57007                          | (T/A)       |
| 34260       | CadSNP9855     | <i>Desi</i>      | Ca_Desig_Scaffold01392       | 57006                          | (A/G)       |
| 34261       | CadSNP9856     | <i>Desi</i>      | Ca_Desig_Scaffold01393       | 73646                          | (T/C)       |
| 34262       | CadSNP9857     | <i>Desi</i>      | Ca_Desig_Scaffold01393       | 73643                          | (C/A)       |
| 34263       | CadSNP9858     | <i>Desi</i>      | Ca_Desig_Scaffold01393       | 73634                          | (T/A)       |
| 34264       | CadSNP9859     | <i>Desi</i>      | Ca_Desig_Scaffold01393       | 73633                          | (T/A)       |
| 34265       | CadSNP9860     | <i>Desi</i>      | Ca_Desig_Scaffold01393       | 73596                          | (T/A)       |
| 34266       | CadSNP9861     | <i>Desi</i>      | Ca_Desig_Scaffold01393       | 73588                          | (G/T)       |
| 34267       | CadSNP9862     | <i>Desi</i>      | Ca_Desig_Scaffold01394       | 1042                           | (T/C)       |
| 34268       | CadSNP9863     | <i>Desi</i>      | Ca_Desig_Scaffold01394       | 1081                           | (G/A)       |
| 34269       | CadSNP9864     | <i>Desi</i>      | Ca_Desig_Scaffold01394       | 1879                           | (G/C)       |
| 34270       | CadSNP9865     | <i>Desi</i>      | Ca_Desig_Scaffold01394       | 42463                          | (C/T)       |
| 34271       | CadSNP9866     | <i>Desi</i>      | Ca_Desig_Scaffold01394       | 42437                          | (T/C)       |
| 34272       | CadSNP9867     | <i>Desi</i>      | Ca_Desig_Scaffold01401       | 24906                          | (T/C)       |
| 34273       | CadSNP9868     | <i>Desi</i>      | Ca_Desig_Scaffold01402       | 49993                          | (A/C)       |
| 34274       | CadSNP9869     | <i>Desi</i>      | Ca_Desig_Scaffold01404       | 69589                          | (C/T)       |
| 34275       | CadSNP9870     | <i>Desi</i>      | Ca_Desig_Scaffold01404       | 69592                          | (C/T)       |



| <b>S.N.</b> | <b>SNP IDs</b> | <b>Cultivars</b> | <b>Chromosomes/scaffolds</b> | <b>Physical positions (bp)</b> | <b>SNPs</b> |
|-------------|----------------|------------------|------------------------------|--------------------------------|-------------|
| 34276       | CadSNP9871     | <i>Desi</i>      | Ca_Desig_Scaffold01404       | 69621                          | (C/T)       |
| 34277       | CadSNP9872     | <i>Desi</i>      | Ca_Desig_Scaffold01404       | 69634                          | (T/C)       |
| 34278       | CadSNP9873     | <i>Desi</i>      | Ca_Desig_Scaffold01405       | 19756                          | (C/T)       |
| 34279       | CadSNP9874     | <i>Desi</i>      | Ca_Desig_Scaffold01405       | 19800                          | (A/G)       |
| 34280       | CadSNP9875     | <i>Desi</i>      | Ca_Desig_Scaffold01405       | 60212                          | (T/C)       |
| 34281       | CadSNP9876     | <i>Desi</i>      | Ca_Desig_Scaffold01409       | 7376                           | (G/A)       |
| 34282       | CadSNP9877     | <i>Desi</i>      | Ca_Desig_Scaffold01412       | 36937                          | (G/A)       |
| 34283       | CadSNP9878     | <i>Desi</i>      | Ca_Desig_Scaffold01412       | 46625                          | (G/A)       |
| 34284       | CadSNP9879     | <i>Desi</i>      | Ca_Desig_Scaffold01412       | 46640                          | (A/G)       |
| 34285       | CadSNP9880     | <i>Desi</i>      | Ca_Desig_Scaffold01412       | 51591                          | (A/C)       |
| 34286       | CadSNP9881     | <i>Desi</i>      | Ca_Desig_Scaffold01412       | 51607                          | (A/C)       |
| 34287       | CadSNP9882     | <i>Desi</i>      | Ca_Desig_Scaffold01412       | 51653                          | (G/A)       |
| 34288       | CadSNP9883     | <i>Desi</i>      | Ca_Desig_Scaffold01413       | 7501                           | (T/C)       |
| 34289       | CadSNP9884     | <i>Desi</i>      | Ca_Desig_Scaffold01413       | 7535                           | (C/T)       |
| 34290       | CadSNP9885     | <i>Desi</i>      | Ca_Desig_Scaffold01413       | 27692                          | (A/G)       |
| 34291       | CadSNP9886     | <i>Desi</i>      | Ca_Desig_Scaffold01413       | 37194                          | (A/G)       |
| 34292       | CadSNP9887     | <i>Desi</i>      | Ca_Desig_Scaffold01413       | 37235                          | (A/G)       |
| 34293       | CadSNP9888     | <i>Desi</i>      | Ca_Desig_Scaffold01413       | 37317                          | (G/A)       |
| 34294       | CadSNP9889     | <i>Desi</i>      | Ca_Desig_Scaffold01413       | 37310                          | (G/C)       |
| 34295       | CadSNP9890     | <i>Desi</i>      | Ca_Desig_Scaffold01413       | 41418                          | (C/T)       |
| 34296       | CadSNP9891     | <i>Desi</i>      | Ca_Desig_Scaffold01413       | 42097                          | (T/A)       |
| 34297       | CadSNP9892     | <i>Desi</i>      | Ca_Desig_Scaffold01422       | 52779                          | (T/C)       |
| 34298       | CadSNP9893     | <i>Desi</i>      | Ca_Desig_Scaffold01422       | 53474                          | (T/G)       |
| 34299       | CadSNP9894     | <i>Desi</i>      | Ca_Desig_Scaffold01422       | 53520                          | (C/T)       |
| 34300       | CadSNP9895     | <i>Desi</i>      | Ca_Desig_Scaffold01425       | 45586                          | (C/T)       |
| 34301       | CadSNP9896     | <i>Desi</i>      | Ca_Desig_Scaffold01425       | 64611                          | (G/A)       |
| 34302       | CadSNP9897     | <i>Desi</i>      | Ca_Desig_Scaffold01425       | 64599                          | (C/A)       |
| 34303       | CadSNP9898     | <i>Desi</i>      | Ca_Desig_Scaffold01425       | 70389                          | (A/T)       |
| 34304       | CadSNP9899     | <i>Desi</i>      | Ca_Desig_Scaffold01426       | 37000                          | (C/G)       |
| 34305       | CadSNP9900     | <i>Desi</i>      | Ca_Desig_Scaffold01426       | 36977                          | (G/T)       |
| 34306       | CadSNP9901     | <i>Desi</i>      | Ca_Desig_Scaffold01426       | 36962                          | (G/A)       |
| 34307       | CadSNP9902     | <i>Desi</i>      | Ca_Desig_Scaffold01426       | 64665                          | (C/T)       |
| 34308       | CadSNP9903     | <i>Desi</i>      | Ca_Desig_Scaffold01427       | 5976                           | (A/G)       |
| 34309       | CadSNP9904     | <i>Desi</i>      | Ca_Desig_Scaffold01427       | 6044                           | (C/A)       |
| 34310       | CadSNP9905     | <i>Desi</i>      | Ca_Desig_Scaffold01427       | 6046                           | (T/C)       |
| 34311       | CadSNP9906     | <i>Desi</i>      | Ca_Desig_Scaffold01427       | 29581                          | (G/T)       |
| 34312       | CadSNP9907     | <i>Desi</i>      | Ca_Desig_Scaffold01427       | 42624                          | (A/T)       |
| 34313       | CadSNP9908     | <i>Desi</i>      | Ca_Desig_Scaffold01428       | 74091                          | (T/C)       |

| <b>S.N.</b> | <b>SNP IDs</b> | <b>Cultivars</b> | <b>Chromosomes/scaffolds</b> | <b>Physical positions (bp)</b> | <b>SNPs</b> |
|-------------|----------------|------------------|------------------------------|--------------------------------|-------------|
| 34314       | CadSNP9909     | <i>Desi</i>      | Ca_Desig_Scaffold01428       | 74135                          | (G/A)       |
| 34315       | CadSNP9910     | <i>Desi</i>      | Ca_Desig_Scaffold01434       | 28093                          | (G/A)       |
| 34316       | CadSNP9911     | <i>Desi</i>      | Ca_Desig_Scaffold01434       | 28237                          | (A/G)       |
| 34317       | CadSNP9912     | <i>Desi</i>      | Ca_Desig_Scaffold01434       | 45523                          | (G/A)       |
| 34318       | CadSNP9913     | <i>Desi</i>      | Ca_Desig_Scaffold01434       | 45627                          | (A/G)       |
| 34319       | CadSNP9914     | <i>Desi</i>      | Ca_Desig_Scaffold01434       | 45618                          | (T/G)       |
| 34320       | CadSNP9915     | <i>Desi</i>      | Ca_Desig_Scaffold01434       | 47804                          | (T/C)       |
| 34321       | CadSNP9916     | <i>Desi</i>      | Ca_Desig_Scaffold01434       | 47837                          | (C/T)       |
| 34322       | CadSNP9917     | <i>Desi</i>      | Ca_Desig_Scaffold01434       | 47897                          | (C/T)       |
| 34323       | CadSNP9918     | <i>Desi</i>      | Ca_Desig_Scaffold01434       | 47947                          | (C/T)       |
| 34324       | CadSNP9919     | <i>Desi</i>      | Ca_Desig_Scaffold01436       | 70487                          | (C/A)       |
| 34325       | CadSNP9920     | <i>Desi</i>      | Ca_Desig_Scaffold01436       | 70514                          | (G/A)       |
| 34326       | CadSNP9921     | <i>Desi</i>      | Ca_Desig_Scaffold01436       | 70516                          | (C/A)       |
| 34327       | CadSNP9922     | <i>Desi</i>      | Ca_Desig_Scaffold01437       | 919                            | (A/G)       |
| 34328       | CadSNP9923     | <i>Desi</i>      | Ca_Desig_Scaffold01438       | 24837                          | (C/T)       |
| 34329       | CadSNP9924     | <i>Desi</i>      | Ca_Desig_Scaffold01441       | 27770                          | (T/G)       |
| 34330       | CadSNP9925     | <i>Desi</i>      | Ca_Desig_Scaffold01441       | 35960                          | (C/G)       |
| 34331       | CadSNP9926     | <i>Desi</i>      | Ca_Desig_Scaffold01444       | 20278                          | (G/A)       |
| 34332       | CadSNP9927     | <i>Desi</i>      | Ca_Desig_Scaffold01444       | 20280                          | (G/A)       |
| 34333       | CadSNP9928     | <i>Desi</i>      | Ca_Desig_Scaffold01444       | 20385                          | (T/C)       |
| 34334       | CadSNP9929     | <i>Desi</i>      | Ca_Desig_Scaffold01444       | 20316                          | (C/G)       |
| 34335       | CadSNP9930     | <i>Desi</i>      | Ca_Desig_Scaffold01444       | 48703                          | (T/A)       |
| 34336       | CadSNP9931     | <i>Desi</i>      | Ca_Desig_Scaffold01444       | 48770                          | (T/C)       |
| 34337       | CadSNP9932     | <i>Desi</i>      | Ca_Desig_Scaffold01448       | 23865                          | (A/C)       |
| 34338       | CadSNP9933     | <i>Desi</i>      | Ca_Desig_Scaffold01448       | 46251                          | (C/A)       |
| 34339       | CadSNP9934     | <i>Desi</i>      | Ca_Desig_Scaffold01448       | 46188                          | (T/C)       |
| 34340       | CadSNP9935     | <i>Desi</i>      | Ca_Desig_Scaffold01448       | 56844                          | (T/G)       |
| 34341       | CadSNP9936     | <i>Desi</i>      | Ca_Desig_Scaffold01459       | 898                            | (G/A)       |
| 34342       | CadSNP9937     | <i>Desi</i>      | Ca_Desig_Scaffold01466       | 14097                          | (C/T)       |
| 34343       | CadSNP9938     | <i>Desi</i>      | Ca_Desig_Scaffold01466       | 21933                          | (A/C)       |
| 34344       | CadSNP9939     | <i>Desi</i>      | Ca_Desig_Scaffold01466       | 22109                          | (T/C)       |
| 34345       | CadSNP9940     | <i>Desi</i>      | Ca_Desig_Scaffold01471       | 46132                          | (A/C)       |
| 34346       | CadSNP9941     | <i>Desi</i>      | Ca_Desig_Scaffold01471       | 46241                          | (C/T)       |
| 34347       | CadSNP9942     | <i>Desi</i>      | Ca_Desig_Scaffold01471       | 54113                          | (C/T)       |
| 34348       | CadSNP9943     | <i>Desi</i>      | Ca_Desig_Scaffold01471       | 63505                          | (G/C)       |
| 34349       | CadSNP9944     | <i>Desi</i>      | Ca_Desig_Scaffold01472       | 43696                          | (C/T)       |
| 34350       | CadSNP9945     | <i>Desi</i>      | Ca_Desig_Scaffold01472       | 43713                          | (A/C)       |
| 34351       | CadSNP9946     | <i>Desi</i>      | Ca_Desig_Scaffold01472       | 43720                          | (A/T)       |

| <b>S.N.</b> | <b>SNP IDs</b> | <b>Cultivars</b> | <b>Chromosomes/scaffolds</b> | <b>Physical positions (bp)</b> | <b>SNPs</b> |
|-------------|----------------|------------------|------------------------------|--------------------------------|-------------|
| 34352       | CadSNP9947     | <i>Desi</i>      | Ca_Desig_Scaffold01472       | 43770                          | (T/C)       |
| 34353       | CadSNP9948     | <i>Desi</i>      | Ca_Desig_Scaffold01472       | 44111                          | (G/C)       |
| 34354       | CadSNP9949     | <i>Desi</i>      | Ca_Desig_Scaffold01473       | 83824                          | (T/G)       |
| 34355       | CadSNP9950     | <i>Desi</i>      | Ca_Desig_Scaffold01473       | 83882                          | (T/C)       |
| 34356       | CadSNP9951     | <i>Desi</i>      | Ca_Desig_Scaffold01473       | 83982                          | (C/T)       |
| 34357       | CadSNP9952     | <i>Desi</i>      | Ca_Desig_Scaffold01473       | 83964                          | (C/A)       |
| 34358       | CadSNP9953     | <i>Desi</i>      | Ca_Desig_Scaffold01475       | 37543                          | (A/G)       |
| 34359       | CadSNP9954     | <i>Desi</i>      | Ca_Desig_Scaffold01475       | 37612                          | (G/A)       |
| 34360       | CadSNP9955     | <i>Desi</i>      | Ca_Desig_Scaffold01475       | 37615                          | (C/T)       |
| 34361       | CadSNP9956     | <i>Desi</i>      | Ca_Desig_Scaffold01475       | 39699                          | (G/A)       |
| 34362       | CadSNP9957     | <i>Desi</i>      | Ca_Desig_Scaffold01475       | 96121                          | (G/T)       |
| 34363       | CadSNP9958     | <i>Desi</i>      | Ca_Desig_Scaffold01475       | 96190                          | (T/C)       |
| 34364       | CadSNP9959     | <i>Desi</i>      | Ca_Desig_Scaffold01477       | 17608                          | (G/A)       |
| 34365       | CadSNP9960     | <i>Desi</i>      | Ca_Desig_Scaffold01477       | 45585                          | (A/T)       |
| 34366       | CadSNP9961     | <i>Desi</i>      | Ca_Desig_Scaffold01477       | 45869                          | (T/C)       |
| 34367       | CadSNP9962     | <i>Desi</i>      | Ca_Desig_Scaffold01477       | 68560                          | (C/T)       |
| 34368       | CadSNP9963     | <i>Desi</i>      | Ca_Desig_Scaffold01477       | 68546                          | (A/T)       |
| 34369       | CadSNP9964     | <i>Desi</i>      | Ca_Desig_Scaffold01477       | 68716                          | (G/A)       |
| 34370       | CadSNP9965     | <i>Desi</i>      | Ca_Desig_Scaffold01478       | 53238                          | (C/A)       |
| 34371       | CadSNP9966     | <i>Desi</i>      | Ca_Desig_Scaffold01478       | 58225                          | (A/T)       |
| 34372       | CadSNP9967     | <i>Desi</i>      | Ca_Desig_Scaffold01478       | 58213                          | (T/C)       |
| 34373       | CadSNP9968     | <i>Desi</i>      | Ca_Desig_Scaffold01478       | 58219                          | (A/C)       |
| 34374       | CadSNP9969     | <i>Desi</i>      | Ca_Desig_Scaffold01478       | 58230                          | (C/A)       |
| 34375       | CadSNP9970     | <i>Desi</i>      | Ca_Desig_Scaffold01478       | 58950                          | (A/G)       |
| 34376       | CadSNP9971     | <i>Desi</i>      | Ca_Desig_Scaffold01478       | 58957                          | (A/T)       |
| 34377       | CadSNP9972     | <i>Desi</i>      | Ca_Desig_Scaffold01478       | 59007                          | (T/C)       |
| 34378       | CadSNP9973     | <i>Desi</i>      | Ca_Desig_Scaffold01478       | 59052                          | (G/A)       |
| 34379       | CadSNP9974     | <i>Desi</i>      | Ca_Desig_Scaffold01478       | 59043                          | (A/T)       |
| 34380       | CadSNP9975     | <i>Desi</i>      | Ca_Desig_Scaffold01478       | 64875                          | (G/A)       |
| 34381       | CadSNP9976     | <i>Desi</i>      | Ca_Desig_Scaffold01479       | 36413                          | (A/G)       |
| 34382       | CadSNP9977     | <i>Desi</i>      | Ca_Desig_Scaffold01480       | 49201                          | (C/G)       |
| 34383       | CadSNP9978     | <i>Desi</i>      | Ca_Desig_Scaffold01483       | 21921                          | (C/A)       |
| 34384       | CadSNP9979     | <i>Desi</i>      | Ca_Desig_Scaffold01483       | 21927                          | (A/G)       |
| 34385       | CadSNP9980     | <i>Desi</i>      | Ca_Desig_Scaffold01484       | 25798                          | (A/C)       |
| 34386       | CadSNP9981     | <i>Desi</i>      | Ca_Desig_Scaffold01484       | 25898                          | (A/T)       |
| 34387       | CadSNP9982     | <i>Desi</i>      | Ca_Desig_Scaffold01484       | 36455                          | (C/T)       |
| 34388       | CadSNP9983     | <i>Desi</i>      | Ca_Desig_Scaffold01484       | 47453                          | (T/A)       |
| 34389       | CadSNP9984     | <i>Desi</i>      | Ca_Desig_Scaffold01484       | 47454                          | (C/G)       |

| <b>S.N.</b> | <b>SNP IDs</b> | <b>Cultivars</b> | <b>Chromosomes/scaffolds</b> | <b>Physical positions (bp)</b> | <b>SNPs</b> |
|-------------|----------------|------------------|------------------------------|--------------------------------|-------------|
| 34390       | CadSNP9985     | <i>Desi</i>      | Ca_Desig_Scaffold01484       | 47540                          | (G/A)       |
| 34391       | CadSNP9986     | <i>Desi</i>      | Ca_Desig_Scaffold01484       | 52236                          | (T/A)       |
| 34392       | CadSNP9987     | <i>Desi</i>      | Ca_Desig_Scaffold01484       | 52239                          | (G/A)       |
| 34393       | CadSNP9988     | <i>Desi</i>      | Ca_Desig_Scaffold01484       | 52302                          | (C/T)       |
| 34394       | CadSNP9989     | <i>Desi</i>      | Ca_Desig_Scaffold01484       | 52363                          | (G/A)       |
| 34395       | CadSNP9990     | <i>Desi</i>      | Ca_Desig_Scaffold01485       | 17915                          | (G/A)       |
| 34396       | CadSNP9991     | <i>Desi</i>      | Ca_Desig_Scaffold01485       | 20749                          | (T/C)       |
| 34397       | CadSNP9992     | <i>Desi</i>      | Ca_Desig_Scaffold01485       | 20765                          | (T/C)       |
| 34398       | CadSNP9993     | <i>Desi</i>      | Ca_Desig_Scaffold01485       | 38034                          | (C/T)       |
| 34399       | CadSNP9994     | <i>Desi</i>      | Ca_Desig_Scaffold01485       | 62809                          | (C/T)       |
| 34400       | CadSNP9995     | <i>Desi</i>      | Ca_Desig_Scaffold01485       | 62803                          | (C/G)       |
| 34401       | CadSNP9996     | <i>Desi</i>      | Ca_Desig_Scaffold01485       | 62772                          | (T/C)       |
| 34402       | CadSNP9997     | <i>Desi</i>      | Ca_Desig_Scaffold01485       | 62748                          | (C/T)       |
| 34403       | CadSNP9998     | <i>Desi</i>      | Ca_Desig_Scaffold01485       | 62737                          | (G/A)       |
| 34404       | CadSNP9999     | <i>Desi</i>      | Ca_Desig_Scaffold01485       | 66450                          | (G/A)       |
| 34405       | CadSNP10000    | <i>Desi</i>      | Ca_Desig_Scaffold01485       | 66413                          | (G/A)       |
| 34406       | CadSNP10001    | <i>Desi</i>      | Ca_Desig_Scaffold01494       | 8136                           | (A/C)       |
| 34407       | CadSNP10002    | <i>Desi</i>      | Ca_Desig_Scaffold01494       | 8140                           | (G/A)       |
| 34408       | CadSNP10003    | <i>Desi</i>      | Ca_Desig_Scaffold01494       | 8141                           | (T/G)       |
| 34409       | CadSNP10004    | <i>Desi</i>      | Ca_Desig_Scaffold01498       | 10917                          | (G/A)       |
| 34410       | CadSNP10005    | <i>Desi</i>      | Ca_Desig_Scaffold01498       | 10981                          | (G/A)       |
| 34411       | CadSNP10006    | <i>Desi</i>      | Ca_Desig_Scaffold01498       | 16221                          | (T/C)       |
| 34412       | CadSNP10007    | <i>Desi</i>      | Ca_Desig_Scaffold01498       | 16337                          | (C/T)       |
| 34413       | CadSNP10008    | <i>Desi</i>      | Ca_Desig_Scaffold01498       | 25450                          | (G/A)       |
| 34414       | CadSNP10009    | <i>Desi</i>      | Ca_Desig_Scaffold01498       | 25551                          | (T/A)       |
| 34415       | CadSNP10010    | <i>Desi</i>      | Ca_Desig_Scaffold01498       | 25592                          | (G/A)       |
| 34416       | CadSNP10011    | <i>Desi</i>      | Ca_Desig_Scaffold01498       | 41589                          | (T/C)       |
| 34417       | CadSNP10012    | <i>Desi</i>      | Ca_Desig_Scaffold01498       | 51436                          | (A/G)       |
| 34418       | CadSNP10013    | <i>Desi</i>      | Ca_Desig_Scaffold01498       | 51850                          | (A/G)       |
| 34419       | CadSNP10014    | <i>Desi</i>      | Ca_Desig_Scaffold01506       | 16447                          | (T/G)       |
| 34420       | CadSNP10015    | <i>Desi</i>      | Ca_Desig_Scaffold01506       | 29466                          | (G/A)       |
| 34421       | CadSNP10016    | <i>Desi</i>      | Ca_Desig_Scaffold01506       | 36782                          | (A/G)       |
| 34422       | CadSNP10017    | <i>Desi</i>      | Ca_Desig_Scaffold01512       | 47340                          | (A/G)       |
| 34423       | CadSNP10018    | <i>Desi</i>      | Ca_Desig_Scaffold01516       | 16345                          | (T/C)       |
| 34424       | CadSNP10019    | <i>Desi</i>      | Ca_Desig_Scaffold01516       | 16335                          | (T/G)       |
| 34425       | CadSNP10020    | <i>Desi</i>      | Ca_Desig_Scaffold01516       | 16327                          | (C/G)       |
| 34426       | CadSNP10021    | <i>Desi</i>      | Ca_Desig_Scaffold01516       | 16323                          | (A/T)       |
| 34427       | CadSNP10022    | <i>Desi</i>      | Ca_Desig_Scaffold01521       | 27336                          | (A/G)       |

| <b>S.N.</b> | <b>SNP IDs</b> | <b>Cultivars</b> | <b>Chromosomes/scaffolds</b> | <b>Physical positions (bp)</b> | <b>SNPs</b> |
|-------------|----------------|------------------|------------------------------|--------------------------------|-------------|
| 34428       | CadSNP10023    | <i>Desi</i>      | Ca_Desig_Scaffold01522       | 32033                          | (T/C)       |
| 34429       | CadSNP10024    | <i>Desi</i>      | Ca_Desig_Scaffold01523       | 26688                          | (A/G)       |
| 34430       | CadSNP10025    | <i>Desi</i>      | Ca_Desig_Scaffold01523       | 41746                          | (C/T)       |
| 34431       | CadSNP10026    | <i>Desi</i>      | Ca_Desig_Scaffold01523       | 41778                          | (A/G)       |
| 34432       | CadSNP10027    | <i>Desi</i>      | Ca_Desig_Scaffold01523       | 54552                          | (C/G)       |
| 34433       | CadSNP10028    | <i>Desi</i>      | Ca_Desig_Scaffold01527       | 3444                           | (T/G)       |
| 34434       | CadSNP10029    | <i>Desi</i>      | Ca_Desig_Scaffold01527       | 3447                           | (T/G)       |
| 34435       | CadSNP10030    | <i>Desi</i>      | Ca_Desig_Scaffold01531       | 17622                          | (C/A)       |
| 34436       | CadSNP10031    | <i>Desi</i>      | Ca_Desig_Scaffold01531       | 46015                          | (C/T)       |
| 34437       | CadSNP10032    | <i>Desi</i>      | Ca_Desig_Scaffold01531       | 46040                          | (G/A)       |
| 34438       | CadSNP10033    | <i>Desi</i>      | Ca_Desig_Scaffold01531       | 60108                          | (C/T)       |
| 34439       | CadSNP10034    | <i>Desi</i>      | Ca_Desig_Scaffold01533       | 19029                          | (T/G)       |
| 34440       | CadSNP10035    | <i>Desi</i>      | Ca_Desig_Scaffold01535       | 53525                          | (G/T)       |
| 34441       | CadSNP10036    | <i>Desi</i>      | Ca_Desig_Scaffold01538       | 31723                          | (A/G)       |
| 34442       | CadSNP10037    | <i>Desi</i>      | Ca_Desig_Scaffold01539       | 25735                          | (A/T)       |
| 34443       | CadSNP10038    | <i>Desi</i>      | Ca_Desig_Scaffold01540       | 62394                          | (A/C)       |
| 34444       | CadSNP10039    | <i>Desi</i>      | Ca_Desig_Scaffold01541       | 33479                          | (C/T)       |
| 34445       | CadSNP10040    | <i>Desi</i>      | Ca_Desig_Scaffold01544       | 19701                          | (C/T)       |
| 34446       | CadSNP10041    | <i>Desi</i>      | Ca_Desig_Scaffold01544       | 21954                          | (A/G)       |
| 34447       | CadSNP10042    | <i>Desi</i>      | Ca_Desig_Scaffold01544       | 21951                          | (G/T)       |
| 34448       | CadSNP10043    | <i>Desi</i>      | Ca_Desig_Scaffold01544       | 21930                          | (A/C)       |
| 34449       | CadSNP10044    | <i>Desi</i>      | Ca_Desig_Scaffold01544       | 60016                          | (G/A)       |
| 34450       | CadSNP10045    | <i>Desi</i>      | Ca_Desig_Scaffold01546       | 44894                          | (A/C)       |
| 34451       | CadSNP10046    | <i>Desi</i>      | Ca_Desig_Scaffold01546       | 44895                          | (G/T)       |
| 34452       | CadSNP10047    | <i>Desi</i>      | Ca_Desig_Scaffold01548       | 20486                          | (T/G)       |
| 34453       | CadSNP10048    | <i>Desi</i>      | Ca_Desig_Scaffold01548       | 30101                          | (A/G)       |
| 34454       | CadSNP10049    | <i>Desi</i>      | Ca_Desig_Scaffold01549       | 55149                          | (T/G)       |
| 34455       | CadSNP10050    | <i>Desi</i>      | Ca_Desig_Scaffold01549       | 55101                          | (T/G)       |
| 34456       | CadSNP10051    | <i>Desi</i>      | Ca_Desig_Scaffold01555       | 57835                          | (T/A)       |
| 34457       | CadSNP10052    | <i>Desi</i>      | Ca_Desig_Scaffold01555       | 57826                          | (T/A)       |
| 34458       | CadSNP10053    | <i>Desi</i>      | Ca_Desig_Scaffold01555       | 57814                          | (T/A)       |
| 34459       | CadSNP10054    | <i>Desi</i>      | Ca_Desig_Scaffold01555       | 57802                          | (T/C)       |
| 34460       | CadSNP10055    | <i>Desi</i>      | Ca_Desig_Scaffold01558       | 31642                          | (C/T)       |
| 34461       | CadSNP10056    | <i>Desi</i>      | Ca_Desig_Scaffold01560       | 46166                          | (T/G)       |
| 34462       | CadSNP10057    | <i>Desi</i>      | Ca_Desig_Scaffold01560       | 46184                          | (A/C)       |
| 34463       | CadSNP10058    | <i>Desi</i>      | Ca_Desig_Scaffold01565       | 70115                          | (T/C)       |
| 34464       | CadSNP10059    | <i>Desi</i>      | Ca_Desig_Scaffold01566       | 12306                          | (A/G)       |
| 34465       | CadSNP10060    | <i>Desi</i>      | Ca_Desig_Scaffold01566       | 44187                          | (T/A)       |

| <b>S.N.</b> | <b>SNP IDs</b> | <b>Cultivars</b> | <b>Chromosomes/scaffolds</b> | <b>Physical positions (bp)</b> | <b>SNPs</b> |
|-------------|----------------|------------------|------------------------------|--------------------------------|-------------|
| 34466       | CadSNP10061    | <i>Desi</i>      | Ca_Desig_Scaffold01566       | 154833                         | (A/T)       |
| 34467       | CadSNP10062    | <i>Desi</i>      | Ca_Desig_Scaffold01570       | 52889                          | (C/G)       |
| 34468       | CadSNP10063    | <i>Desi</i>      | Ca_Desig_Scaffold01570       | 52879                          | (A/T)       |
| 34469       | CadSNP10064    | <i>Desi</i>      | Ca_Desig_Scaffold01570       | 53053                          | (C/T)       |
| 34470       | CadSNP10065    | <i>Desi</i>      | Ca_Desig_Scaffold01570       | 53054                          | (T/C)       |
| 34471       | CadSNP10066    | <i>Desi</i>      | Ca_Desig_Scaffold01570       | 53065                          | (A/T)       |
| 34472       | CadSNP10067    | <i>Desi</i>      | Ca_Desig_Scaffold01570       | 53070                          | (A/T)       |
| 34473       | CadSNP10068    | <i>Desi</i>      | Ca_Desig_Scaffold01570       | 53072                          | (A/T)       |
| 34474       | CadSNP10069    | <i>Desi</i>      | Ca_Desig_Scaffold01570       | 53078                          | (C/T)       |
| 34475       | CadSNP10070    | <i>Desi</i>      | Ca_Desig_Scaffold01570       | 53088                          | (A/T)       |
| 34476       | CadSNP10071    | <i>Desi</i>      | Ca_Desig_Scaffold01570       | 53094                          | (A/T)       |
| 34477       | CadSNP10072    | <i>Desi</i>      | Ca_Desig_Scaffold01570       | 53098                          | (A/T)       |
| 34478       | CadSNP10073    | <i>Desi</i>      | Ca_Desig_Scaffold01570       | 53102                          | (G/T)       |
| 34479       | CadSNP10074    | <i>Desi</i>      | Ca_Desig_Scaffold01570       | 53135                          | (G/A)       |
| 34480       | CadSNP10075    | <i>Desi</i>      | Ca_Desig_Scaffold01571       | 17533                          | (G/A)       |
| 34481       | CadSNP10076    | <i>Desi</i>      | Ca_Desig_Scaffold01571       | 17502                          | (C/A)       |
| 34482       | CadSNP10077    | <i>Desi</i>      | Ca_Desig_Scaffold01574       | 14220                          | (G/A)       |
| 34483       | CadSNP10078    | <i>Desi</i>      | Ca_Desig_Scaffold01574       | 14219                          | (A/C)       |
| 34484       | CadSNP10079    | <i>Desi</i>      | Ca_Desig_Scaffold01574       | 14215                          | (A/G)       |
| 34485       | CadSNP10080    | <i>Desi</i>      | Ca_Desig_Scaffold01574       | 14213                          | (C/A)       |
| 34486       | CadSNP10081    | <i>Desi</i>      | Ca_Desig_Scaffold01574       | 14209                          | (C/A)       |
| 34487       | CadSNP10082    | <i>Desi</i>      | Ca_Desig_Scaffold01575       | 19385                          | (A/T)       |
| 34488       | CadSNP10083    | <i>Desi</i>      | Ca_Desig_Scaffold01576       | 64293                          | (C/T)       |
| 34489       | CadSNP10084    | <i>Desi</i>      | Ca_Desig_Scaffold01576       | 64307                          | (A/G)       |
| 34490       | CadSNP10085    | <i>Desi</i>      | Ca_Desig_Scaffold01583       | 12991                          | (C/A)       |
| 34491       | CadSNP10086    | <i>Desi</i>      | Ca_Desig_Scaffold01583       | 12995                          | (G/A)       |
| 34492       | CadSNP10087    | <i>Desi</i>      | Ca_Desig_Scaffold01583       | 13007                          | (T/A)       |
| 34493       | CadSNP10088    | <i>Desi</i>      | Ca_Desig_Scaffold01583       | 14420                          | (A/G)       |
| 34494       | CadSNP10089    | <i>Desi</i>      | Ca_Desig_Scaffold01583       | 26575                          | (T/G)       |
| 34495       | CadSNP10090    | <i>Desi</i>      | Ca_Desig_Scaffold01583       | 26612                          | (G/A)       |
| 34496       | CadSNP10091    | <i>Desi</i>      | Ca_Desig_Scaffold01583       | 43893                          | (T/C)       |
| 34497       | CadSNP10092    | <i>Desi</i>      | Ca_Desig_Scaffold01583       | 44054                          | (T/A)       |
| 34498       | CadSNP10093    | <i>Desi</i>      | Ca_Desig_Scaffold01586       | 6253                           | (C/T)       |
| 34499       | CadSNP10094    | <i>Desi</i>      | Ca_Desig_Scaffold01586       | 41503                          | (C/T)       |
| 34500       | CadSNP10095    | <i>Desi</i>      | Ca_Desig_Scaffold01586       | 41640                          | (A/G)       |
| 34501       | CadSNP10096    | <i>Desi</i>      | Ca_Desig_Scaffold01589       | 24974                          | (G/A)       |
| 34502       | CadSNP10097    | <i>Desi</i>      | Ca_Desig_Scaffold01589       | 25286                          | (T/G)       |
| 34503       | CadSNP10098    | <i>Desi</i>      | Ca_Desig_Scaffold01589       | 59412                          | (A/G)       |

| <b>S.N.</b> | <b>SNP IDs</b> | <b>Cultivars</b> | <b>Chromosomes/scaffolds</b> | <b>Physical positions (bp)</b> | <b>SNPs</b> |
|-------------|----------------|------------------|------------------------------|--------------------------------|-------------|
| 34504       | CadSNP10099    | <i>Desi</i>      | Ca_Desig_Scaffold01600       | 22193                          | (C/T)       |
| 34505       | CadSNP10100    | <i>Desi</i>      | Ca_Desig_Scaffold01600       | 67232                          | (A/G)       |
| 34506       | CadSNP10101    | <i>Desi</i>      | Ca_Desig_Scaffold01603       | 33452                          | (C/T)       |
| 34507       | CadSNP10102    | <i>Desi</i>      | Ca_Desig_Scaffold01603       | 33453                          | (T/C)       |
| 34508       | CadSNP10103    | <i>Desi</i>      | Ca_Desig_Scaffold01603       | 33458                          | (C/T)       |
| 34509       | CadSNP10104    | <i>Desi</i>      | Ca_Desig_Scaffold01603       | 33460                          | (G/T)       |
| 34510       | CadSNP10105    | <i>Desi</i>      | Ca_Desig_Scaffold01603       | 33464                          | (G/T)       |
| 34511       | CadSNP10106    | <i>Desi</i>      | Ca_Desig_Scaffold01603       | 33468                          | (T/A)       |
| 34512       | CadSNP10107    | <i>Desi</i>      | Ca_Desig_Scaffold01603       | 33469                          | (G/A)       |
| 34513       | CadSNP10108    | <i>Desi</i>      | Ca_Desig_Scaffold01603       | 39757                          | (A/G)       |
| 34514       | CadSNP10109    | <i>Desi</i>      | Ca_Desig_Scaffold01603       | 39879                          | (C/G)       |
| 34515       | CadSNP10110    | <i>Desi</i>      | Ca_Desig_Scaffold01605       | 10973                          | (G/C)       |
| 34516       | CadSNP10111    | <i>Desi</i>      | Ca_Desig_Scaffold01605       | 10976                          | (T/G)       |
| 34517       | CadSNP10112    | <i>Desi</i>      | Ca_Desig_Scaffold01605       | 14590                          | (A/G)       |
| 34518       | CadSNP10113    | <i>Desi</i>      | Ca_Desig_Scaffold01607       | 53631                          | (G/A)       |
| 34519       | CadSNP10114    | <i>Desi</i>      | Ca_Desig_Scaffold01607       | 53764                          | (C/T)       |
| 34520       | CadSNP10115    | <i>Desi</i>      | Ca_Desig_Scaffold01607       | 53759                          | (C/T)       |
| 34521       | CadSNP10116    | <i>Desi</i>      | Ca_Desig_Scaffold01611       | 58215                          | (A/T)       |
| 34522       | CadSNP10117    | <i>Desi</i>      | Ca_Desig_Scaffold01619       | 44792                          | (A/C)       |
| 34523       | CadSNP10118    | <i>Desi</i>      | Ca_Desig_Scaffold01623       | 7317                           | (G/T)       |
| 34524       | CadSNP10119    | <i>Desi</i>      | Ca_Desig_Scaffold01624       | 35559                          | (C/T)       |
| 34525       | CadSNP10120    | <i>Desi</i>      | Ca_Desig_Scaffold01626       | 51475                          | (C/A)       |
| 34526       | CadSNP10121    | <i>Desi</i>      | Ca_Desig_Scaffold01629       | 11694                          | (T/G)       |
| 34527       | CadSNP10122    | <i>Desi</i>      | Ca_Desig_Scaffold01629       | 32083                          | (A/C)       |
| 34528       | CadSNP10123    | <i>Desi</i>      | Ca_Desig_Scaffold01629       | 54972                          | (G/T)       |
| 34529       | CadSNP10124    | <i>Desi</i>      | Ca_Desig_Scaffold01629       | 54906                          | (A/G)       |
| 34530       | CadSNP10125    | <i>Desi</i>      | Ca_Desig_Scaffold01634       | 8900                           | (C/T)       |
| 34531       | CadSNP10126    | <i>Desi</i>      | Ca_Desig_Scaffold01636       | 36458                          | (A/T)       |
| 34532       | CadSNP10127    | <i>Desi</i>      | Ca_Desig_Scaffold01636       | 64539                          | (C/T)       |
| 34533       | CadSNP10128    | <i>Desi</i>      | Ca_Desig_Scaffold01636       | 64555                          | (C/T)       |
| 34534       | CadSNP10129    | <i>Desi</i>      | Ca_Desig_Scaffold01636       | 64556                          | (G/T)       |
| 34535       | CadSNP10130    | <i>Desi</i>      | Ca_Desig_Scaffold01636       | 64561                          | (G/C)       |
| 34536       | CadSNP10131    | <i>Desi</i>      | Ca_Desig_Scaffold01636       | 64578                          | (G/T)       |
| 34537       | CadSNP10132    | <i>Desi</i>      | Ca_Desig_Scaffold01636       | 64581                          | (G/A)       |
| 34538       | CadSNP10133    | <i>Desi</i>      | Ca_Desig_Scaffold01636       | 64586                          | (A/G)       |
| 34539       | CadSNP10134    | <i>Desi</i>      | Ca_Desig_Scaffold01636       | 64593                          | (G/A)       |
| 34540       | CadSNP10135    | <i>Desi</i>      | Ca_Desig_Scaffold01636       | 64598                          | (G/T)       |
| 34541       | CadSNP10136    | <i>Desi</i>      | Ca_Desig_Scaffold01636       | 64601                          | (G/T)       |

| <b>S.N.</b> | <b>SNP IDs</b> | <b>Cultivars</b> | <b>Chromosomes/scaffolds</b> | <b>Physical positions (bp)</b> | <b>SNPs</b> |
|-------------|----------------|------------------|------------------------------|--------------------------------|-------------|
| 34542       | CadSNP10137    | <i>Desi</i>      | Ca_Desig_Scaffold01636       | 64605                          | (C/T)       |
| 34543       | CadSNP10138    | <i>Desi</i>      | Ca_Desig_Scaffold01636       | 64606                          | (T/C)       |
| 34544       | CadSNP10139    | <i>Desi</i>      | Ca_Desig_Scaffold01642       | 8979                           | (A/T)       |
| 34545       | CadSNP10140    | <i>Desi</i>      | Ca_Desig_Scaffold01642       | 8974                           | (T/G)       |
| 34546       | CadSNP10141    | <i>Desi</i>      | Ca_Desig_Scaffold01642       | 13494                          | (G/A)       |
| 34547       | CadSNP10142    | <i>Desi</i>      | Ca_Desig_Scaffold01642       | 46424                          | (G/T)       |
| 34548       | CadSNP10143    | <i>Desi</i>      | Ca_Desig_Scaffold01651       | 26498                          | (T/C)       |
| 34549       | CadSNP10144    | <i>Desi</i>      | Ca_Desig_Scaffold01652       | 65244                          | (G/C)       |
| 34550       | CadSNP10145    | <i>Desi</i>      | Ca_Desig_Scaffold01654       | 14415                          | (C/T)       |
| 34551       | CadSNP10146    | <i>Desi</i>      | Ca_Desig_Scaffold01654       | 14482                          | (G/T)       |
| 34552       | CadSNP10147    | <i>Desi</i>      | Ca_Desig_Scaffold01658       | 55321                          | (G/C)       |
| 34553       | CadSNP10148    | <i>Desi</i>      | Ca_Desig_Scaffold01658       | 65227                          | (T/A)       |
| 34554       | CadSNP10149    | <i>Desi</i>      | Ca_Desig_Scaffold01658       | 65289                          | (C/T)       |
| 34555       | CadSNP10150    | <i>Desi</i>      | Ca_Desig_Scaffold01658       | 65251                          | (G/A)       |
| 34556       | CadSNP10151    | <i>Desi</i>      | Ca_Desig_Scaffold01660       | 10193                          | (C/G)       |
| 34557       | CadSNP10152    | <i>Desi</i>      | Ca_Desig_Scaffold01660       | 10205                          | (G/A)       |
| 34558       | CadSNP10153    | <i>Desi</i>      | Ca_Desig_Scaffold01660       | 10253                          | (A/G)       |
| 34559       | CadSNP10154    | <i>Desi</i>      | Ca_Desig_Scaffold01660       | 37122                          | (G/A)       |
| 34560       | CadSNP10155    | <i>Desi</i>      | Ca_Desig_Scaffold01660       | 37298                          | (C/T)       |
| 34561       | CadSNP10156    | <i>Desi</i>      | Ca_Desig_Scaffold01660       | 37272                          | (C/T)       |
| 34562       | CadSNP10157    | <i>Desi</i>      | Ca_Desig_Scaffold01660       | 37231                          | (T/C)       |
| 34563       | CadSNP10158    | <i>Desi</i>      | Ca_Desig_Scaffold01660       | 42831                          | (T/C)       |
| 34564       | CadSNP10159    | <i>Desi</i>      | Ca_Desig_Scaffold01660       | 42828                          | (A/C)       |
| 34565       | CadSNP10160    | <i>Desi</i>      | Ca_Desig_Scaffold01665       | 23394                          | (A/C)       |
| 34566       | CadSNP10161    | <i>Desi</i>      | Ca_Desig_Scaffold01665       | 23357                          | (T/C)       |
| 34567       | CadSNP10162    | <i>Desi</i>      | Ca_Desig_Scaffold01666       | 50936                          | (C/T)       |
| 34568       | CadSNP10163    | <i>Desi</i>      | Ca_Desig_Scaffold01667       | 33508                          | (T/C)       |
| 34569       | CadSNP10164    | <i>Desi</i>      | Ca_Desig_Scaffold01667       | 33602                          | (T/G)       |
| 34570       | CadSNP10165    | <i>Desi</i>      | Ca_Desig_Scaffold01670       | 1615                           | (T/C)       |
| 34571       | CadSNP10166    | <i>Desi</i>      | Ca_Desig_Scaffold01670       | 1643                           | (A/T)       |
| 34572       | CadSNP10167    | <i>Desi</i>      | Ca_Desig_Scaffold01670       | 1644                           | (C/A)       |
| 34573       | CadSNP10168    | <i>Desi</i>      | Ca_Desig_Scaffold01670       | 1669                           | (G/T)       |
| 34574       | CadSNP10169    | <i>Desi</i>      | Ca_Desig_Scaffold01670       | 22226                          | (C/T)       |
| 34575       | CadSNP10170    | <i>Desi</i>      | Ca_Desig_Scaffold01673       | 16883                          | (T/C)       |
| 34576       | CadSNP10171    | <i>Desi</i>      | Ca_Desig_Scaffold01675       | 47472                          | (T/G)       |
| 34577       | CadSNP10172    | <i>Desi</i>      | Ca_Desig_Scaffold01675       | 47508                          | (T/A)       |
| 34578       | CadSNP10173    | <i>Desi</i>      | Ca_Desig_Scaffold01676       | 18061                          | (T/G)       |
| 34579       | CadSNP10174    | <i>Desi</i>      | Ca_Desig_Scaffold01678       | 54701                          | (T/G)       |



| <b>S.N.</b> | <b>SNP IDs</b> | <b>Cultivars</b> | <b>Chromosomes/scaffolds</b> | <b>Physical positions (bp)</b> | <b>SNPs</b> |
|-------------|----------------|------------------|------------------------------|--------------------------------|-------------|
| 34580       | CadSNP10175    | <i>Desi</i>      | Ca_Desig_Scaffold01678       | 64754                          | (G/A)       |
| 34581       | CadSNP10176    | <i>Desi</i>      | Ca_Desig_Scaffold01684       | 19898                          | (T/G)       |
| 34582       | CadSNP10177    | <i>Desi</i>      | Ca_Desig_Scaffold01684       | 58927                          | (G/C)       |
| 34583       | CadSNP10178    | <i>Desi</i>      | Ca_Desig_Scaffold01684       | 58933                          | (G/A)       |
| 34584       | CadSNP10179    | <i>Desi</i>      | Ca_Desig_Scaffold01687       | 46663                          | (G/T)       |
| 34585       | CadSNP10180    | <i>Desi</i>      | Ca_Desig_Scaffold01687       | 46671                          | (G/T)       |
| 34586       | CadSNP10181    | <i>Desi</i>      | Ca_Desig_Scaffold01694       | 855                            | (T/G)       |
| 34587       | CadSNP10182    | <i>Desi</i>      | Ca_Desig_Scaffold01694       | 931                            | (G/A)       |
| 34588       | CadSNP10183    | <i>Desi</i>      | Ca_Desig_Scaffold01694       | 979                            | (C/G)       |
| 34589       | CadSNP10184    | <i>Desi</i>      | Ca_Desig_Scaffold01694       | 1030                           | (G/C)       |
| 34590       | CadSNP10185    | <i>Desi</i>      | Ca_Desig_Scaffold01694       | 1022                           | (A/G)       |
| 34591       | CadSNP10186    | <i>Desi</i>      | Ca_Desig_Scaffold01694       | 4563                           | (T/C)       |
| 34592       | CadSNP10187    | <i>Desi</i>      | Ca_Desig_Scaffold01694       | 14866                          | (G/A)       |
| 34593       | CadSNP10188    | <i>Desi</i>      | Ca_Desig_Scaffold01694       | 15159                          | (A/T)       |
| 34594       | CadSNP10189    | <i>Desi</i>      | Ca_Desig_Scaffold01694       | 15139                          | (A/C)       |
| 34595       | CadSNP10190    | <i>Desi</i>      | Ca_Desig_Scaffold01694       | 50111                          | (G/A)       |
| 34596       | CadSNP10191    | <i>Desi</i>      | Ca_Desig_Scaffold01694       | 50124                          | (G/A)       |
| 34597       | CadSNP10192    | <i>Desi</i>      | Ca_Desig_Scaffold01694       | 50142                          | (C/T)       |
| 34598       | CadSNP10193    | <i>Desi</i>      | Ca_Desig_Scaffold01706       | 46045                          | (A/G)       |
| 34599       | CadSNP10194    | <i>Desi</i>      | Ca_Desig_Scaffold01706       | 46061                          | (G/A)       |
| 34600       | CadSNP10195    | <i>Desi</i>      | Ca_Desig_Scaffold01706       | 46138                          | (A/G)       |
| 34601       | CadSNP10196    | <i>Desi</i>      | Ca_Desig_Scaffold01706       | 46127                          | (C/T)       |
| 34602       | CadSNP10197    | <i>Desi</i>      | Ca_Desig_Scaffold01706       | 46123                          | (T/C)       |
| 34603       | CadSNP10198    | <i>Desi</i>      | Ca_Desig_Scaffold01706       | 46122                          | (G/A)       |
| 34604       | CadSNP10199    | <i>Desi</i>      | Ca_Desig_Scaffold01706       | 46119                          | (G/A)       |
| 34605       | CadSNP10200    | <i>Desi</i>      | Ca_Desig_Scaffold01706       | 46118                          | (T/G)       |
| 34606       | CadSNP10201    | <i>Desi</i>      | Ca_Desig_Scaffold01706       | 57939                          | (T/C)       |
| 34607       | CadSNP10202    | <i>Desi</i>      | Ca_Desig_Scaffold01706       | 58020                          | (C/G)       |
| 34608       | CadSNP10203    | <i>Desi</i>      | Ca_Desig_Scaffold01708       | 53451                          | (T/G)       |
| 34609       | CadSNP10204    | <i>Desi</i>      | Ca_Desig_Scaffold01708       | 53464                          | (A/C)       |
| 34610       | CadSNP10205    | <i>Desi</i>      | Ca_Desig_Scaffold01711       | 7870                           | (G/A)       |
| 34611       | CadSNP10206    | <i>Desi</i>      | Ca_Desig_Scaffold01711       | 7822                           | (G/A)       |
| 34612       | CadSNP10207    | <i>Desi</i>      | Ca_Desig_Scaffold01711       | 54228                          | (A/G)       |
| 34613       | CadSNP10208    | <i>Desi</i>      | Ca_Desig_Scaffold01714       | 16856                          | (G/C)       |
| 34614       | CadSNP10209    | <i>Desi</i>      | Ca_Desig_Scaffold01714       | 19580                          | (C/A)       |
| 34615       | CadSNP10210    | <i>Desi</i>      | Ca_Desig_Scaffold01714       | 19642                          | (C/A)       |
| 34616       | CadSNP10211    | <i>Desi</i>      | Ca_Desig_Scaffold01714       | 19643                          | (G/T)       |
| 34617       | CadSNP10212    | <i>Desi</i>      | Ca_Desig_Scaffold01714       | 32019                          | (A/G)       |

| <b>S.N.</b> | <b>SNP IDs</b> | <b>Cultivars</b> | <b>Chromosomes/scaffolds</b> | <b>Physical positions (bp)</b> | <b>SNPs</b> |
|-------------|----------------|------------------|------------------------------|--------------------------------|-------------|
| 34618       | CadSNP10213    | <i>Desi</i>      | Ca_Desig_Scaffold01714       | 60065                          | (A/T)       |
| 34619       | CadSNP10214    | <i>Desi</i>      | Ca_Desig_Scaffold01715       | 43672                          | (T/C)       |
| 34620       | CadSNP10215    | <i>Desi</i>      | Ca_Desig_Scaffold01718       | 13662                          | (A/C)       |
| 34621       | CadSNP10216    | <i>Desi</i>      | Ca_Desig_Scaffold01718       | 13664                          | (C/A)       |
| 34622       | CadSNP10217    | <i>Desi</i>      | Ca_Desig_Scaffold01718       | 13702                          | (C/T)       |
| 34623       | CadSNP10218    | <i>Desi</i>      | Ca_Desig_Scaffold01721       | 17834                          | (C/T)       |
| 34624       | CadSNP10219    | <i>Desi</i>      | Ca_Desig_Scaffold01722       | 12293                          | (G/A)       |
| 34625       | CadSNP10220    | <i>Desi</i>      | Ca_Desig_Scaffold01722       | 14344                          | (G/A)       |
| 34626       | CadSNP10221    | <i>Desi</i>      | Ca_Desig_Scaffold01722       | 14347                          | (T/C)       |
| 34627       | CadSNP10222    | <i>Desi</i>      | Ca_Desig_Scaffold01722       | 14388                          | (T/G)       |
| 34628       | CadSNP10223    | <i>Desi</i>      | Ca_Desig_Scaffold01722       | 14405                          | (A/G)       |
| 34629       | CadSNP10224    | <i>Desi</i>      | Ca_Desig_Scaffold01722       | 21756                          | (A/G)       |
| 34630       | CadSNP10225    | <i>Desi</i>      | Ca_Desig_Scaffold01723       | 59117                          | (A/G)       |
| 34631       | CadSNP10226    | <i>Desi</i>      | Ca_Desig_Scaffold01723       | 63059                          | (C/T)       |
| 34632       | CadSNP10227    | <i>Desi</i>      | Ca_Desig_Scaffold01728       | 52580                          | (G/T)       |
| 34633       | CadSNP10228    | <i>Desi</i>      | Ca_Desig_Scaffold01734       | 35981                          | (T/C)       |
| 34634       | CadSNP10229    | <i>Desi</i>      | Ca_Desig_Scaffold01734       | 35956                          | (G/A)       |
| 34635       | CadSNP10230    | <i>Desi</i>      | Ca_Desig_Scaffold01734       | 37119                          | (T/C)       |
| 34636       | CadSNP10231    | <i>Desi</i>      | Ca_Desig_Scaffold01734       | 37282                          | (T/C)       |
| 34637       | CadSNP10232    | <i>Desi</i>      | Ca_Desig_Scaffold01734       | 43913                          | (G/T)       |
| 34638       | CadSNP10233    | <i>Desi</i>      | Ca_Desig_Scaffold01734       | 50106                          | (A/G)       |
| 34639       | CadSNP10234    | <i>Desi</i>      | Ca_Desig_Scaffold01734       | 50347                          | (T/A)       |
| 34640       | CadSNP10235    | <i>Desi</i>      | Ca_Desig_Scaffold01734       | 53286                          | (T/C)       |
| 34641       | CadSNP10236    | <i>Desi</i>      | Ca_Desig_Scaffold01734       | 53287                          | (T/C)       |
| 34642       | CadSNP10237    | <i>Desi</i>      | Ca_Desig_Scaffold01734       | 54678                          | (A/G)       |
| 34643       | CadSNP10238    | <i>Desi</i>      | Ca_Desig_Scaffold01734       | 54748                          | (A/G)       |
| 34644       | CadSNP10239    | <i>Desi</i>      | Ca_Desig_Scaffold01737       | 44986                          | (A/T)       |
| 34645       | CadSNP10240    | <i>Desi</i>      | Ca_Desig_Scaffold01737       | 45190                          | (G/T)       |
| 34646       | CadSNP10241    | <i>Desi</i>      | Ca_Desig_Scaffold01741       | 40169                          | (T/A)       |
| 34647       | CadSNP10242    | <i>Desi</i>      | Ca_Desig_Scaffold01741       | 40109                          | (T/C)       |
| 34648       | CadSNP10243    | <i>Desi</i>      | Ca_Desig_Scaffold01755       | 8283                           | (T/C)       |
| 34649       | CadSNP10244    | <i>Desi</i>      | Ca_Desig_Scaffold01755       | 8335                           | (G/A)       |
| 34650       | CadSNP10245    | <i>Desi</i>      | Ca_Desig_Scaffold01758       | 35499                          | (A/G)       |
| 34651       | CadSNP10246    | <i>Desi</i>      | Ca_Desig_Scaffold01759       | 11408                          | (T/C)       |
| 34652       | CadSNP10247    | <i>Desi</i>      | Ca_Desig_Scaffold01760       | 6729                           | (C/A)       |
| 34653       | CadSNP10248    | <i>Desi</i>      | Ca_Desig_Scaffold01769       | 10327                          | (C/T)       |
| 34654       | CadSNP10249    | <i>Desi</i>      | Ca_Desig_Scaffold01769       | 10340                          | (G/A)       |
| 34655       | CadSNP10250    | <i>Desi</i>      | Ca_Desig_Scaffold01769       | 10413                          | (C/T)       |

| <b>S.N.</b> | <b>SNP IDs</b> | <b>Cultivars</b> | <b>Chromosomes/scaffolds</b> | <b>Physical positions (bp)</b> | <b>SNPs</b> |
|-------------|----------------|------------------|------------------------------|--------------------------------|-------------|
| 34656       | CadSNP10251    | <i>Desi</i>      | Ca_Desig_Scaffold01769       | 10398                          | (G/T)       |
| 34657       | CadSNP10252    | <i>Desi</i>      | Ca_Desig_Scaffold01769       | 10393                          | (A/C)       |
| 34658       | CadSNP10253    | <i>Desi</i>      | Ca_Desig_Scaffold01769       | 10380                          | (T/G)       |
| 34659       | CadSNP10254    | <i>Desi</i>      | Ca_Desig_Scaffold01769       | 24496                          | (T/C)       |
| 34660       | CadSNP10255    | <i>Desi</i>      | Ca_Desig_Scaffold01769       | 24497                          | (T/A)       |
| 34661       | CadSNP10256    | <i>Desi</i>      | Ca_Desig_Scaffold01769       | 24506                          | (C/T)       |
| 34662       | CadSNP10257    | <i>Desi</i>      | Ca_Desig_Scaffold01769       | 24517                          | (C/T)       |
| 34663       | CadSNP10258    | <i>Desi</i>      | Ca_Desig_Scaffold01770       | 66951                          | (T/A)       |
| 34664       | CadSNP10259    | <i>Desi</i>      | Ca_Desig_Scaffold01770       | 66960                          | (A/G)       |
| 34665       | CadSNP10260    | <i>Desi</i>      | Ca_Desig_Scaffold01772       | 3962                           | (C/T)       |
| 34666       | CadSNP10261    | <i>Desi</i>      | Ca_Desig_Scaffold01772       | 8261                           | (T/A)       |
| 34667       | CadSNP10262    | <i>Desi</i>      | Ca_Desig_Scaffold01772       | 8262                           | (G/T)       |
| 34668       | CadSNP10263    | <i>Desi</i>      | Ca_Desig_Scaffold01772       | 8279                           | (G/C)       |
| 34669       | CadSNP10264    | <i>Desi</i>      | Ca_Desig_Scaffold01772       | 24789                          | (A/G)       |
| 34670       | CadSNP10265    | <i>Desi</i>      | Ca_Desig_Scaffold01772       | 24844                          | (A/C)       |
| 34671       | CadSNP10266    | <i>Desi</i>      | Ca_Desig_Scaffold01772       | 25113                          | (T/G)       |
| 34672       | CadSNP10267    | <i>Desi</i>      | Ca_Desig_Scaffold01772       | 27054                          | (C/T)       |
| 34673       | CadSNP10268    | <i>Desi</i>      | Ca_Desig_Scaffold01772       | 43325                          | (G/T)       |
| 34674       | CadSNP10269    | <i>Desi</i>      | Ca_Desig_Scaffold01773       | 41618                          | (C/T)       |
| 34675       | CadSNP10270    | <i>Desi</i>      | Ca_Desig_Scaffold01773       | 41653                          | (T/A)       |
| 34676       | CadSNP10271    | <i>Desi</i>      | Ca_Desig_Scaffold01774       | 44337                          | (G/C)       |
| 34677       | CadSNP10272    | <i>Desi</i>      | Ca_Desig_Scaffold01774       | 44332                          | (G/T)       |
| 34678       | CadSNP10273    | <i>Desi</i>      | Ca_Desig_Scaffold01774       | 52783                          | (T/C)       |
| 34679       | CadSNP10274    | <i>Desi</i>      | Ca_Desig_Scaffold01787       | 109525                         | (C/A)       |
| 34680       | CadSNP10275    | <i>Desi</i>      | Ca_Desig_Scaffold01789       | 34642                          | (A/G)       |
| 34681       | CadSNP10276    | <i>Desi</i>      | Ca_Desig_Scaffold01789       | 34582                          | (A/T)       |
| 34682       | CadSNP10277    | <i>Desi</i>      | Ca_Desig_Scaffold01793       | 37544                          | (T/C)       |
| 34683       | CadSNP10278    | <i>Desi</i>      | Ca_Desig_Scaffold01793       | 37796                          | (C/T)       |
| 34684       | CadSNP10279    | <i>Desi</i>      | Ca_Desig_Scaffold01793       | 37760                          | (T/C)       |
| 34685       | CadSNP10280    | <i>Desi</i>      | Ca_Desig_Scaffold01799       | 54096                          | (G/A)       |
| 34686       | CadSNP10281    | <i>Desi</i>      | Ca_Desig_Scaffold01803       | 14900                          | (C/T)       |
| 34687       | CadSNP10282    | <i>Desi</i>      | Ca_Desig_Scaffold01805       | 14511                          | (C/A)       |
| 34688       | CadSNP10283    | <i>Desi</i>      | Ca_Desig_Scaffold01806       | 15766                          | (T/C)       |
| 34689       | CadSNP10284    | <i>Desi</i>      | Ca_Desig_Scaffold01806       | 20234                          | (T/C)       |
| 34690       | CadSNP10285    | <i>Desi</i>      | Ca_Desig_Scaffold01806       | 45629                          | (C/A)       |
| 34691       | CadSNP10286    | <i>Desi</i>      | Ca_Desig_Scaffold01806       | 45634                          | (T/A)       |
| 34692       | CadSNP10287    | <i>Desi</i>      | Ca_Desig_Scaffold01808       | 76336                          | (A/G)       |
| 34693       | CadSNP10288    | <i>Desi</i>      | Ca_Desig_Scaffold01808       | 76455                          | (A/C)       |

| <b>S.N.</b> | <b>SNP IDs</b> | <b>Cultivars</b> | <b>Chromosomes/scaffolds</b> | <b>Physical positions (bp)</b> | <b>SNPs</b> |
|-------------|----------------|------------------|------------------------------|--------------------------------|-------------|
| 34694       | CadSNP10289    | <i>Desi</i>      | Ca_Desig_Scaffold01810       | 21947                          | (A/G)       |
| 34695       | CadSNP10290    | <i>Desi</i>      | Ca_Desig_Scaffold01811       | 1953                           | (G/C)       |
| 34696       | CadSNP10291    | <i>Desi</i>      | Ca_Desig_Scaffold01819       | 60566                          | (T/C)       |
| 34697       | CadSNP10292    | <i>Desi</i>      | Ca_Desig_Scaffold01821       | 12023                          | (G/A)       |
| 34698       | CadSNP10293    | <i>Desi</i>      | Ca_Desig_Scaffold01824       | 26140                          | (T/A)       |
| 34699       | CadSNP10294    | <i>Desi</i>      | Ca_Desig_Scaffold01824       | 26141                          | (A/T)       |
| 34700       | CadSNP10295    | <i>Desi</i>      | Ca_Desig_Scaffold01824       | 26221                          | (G/A)       |
| 34701       | CadSNP10296    | <i>Desi</i>      | Ca_Desig_Scaffold01824       | 26337                          | (T/G)       |
| 34702       | CadSNP10297    | <i>Desi</i>      | Ca_Desig_Scaffold01825       | 37420                          | (C/T)       |
| 34703       | CadSNP10298    | <i>Desi</i>      | Ca_Desig_Scaffold01825       | 37430                          | (G/T)       |
| 34704       | CadSNP10299    | <i>Desi</i>      | Ca_Desig_Scaffold01825       | 37434                          | (C/T)       |
| 34705       | CadSNP10300    | <i>Desi</i>      | Ca_Desig_Scaffold01825       | 37526                          | (T/G)       |
| 34706       | CadSNP10301    | <i>Desi</i>      | Ca_Desig_Scaffold01825       | 37503                          | (G/C)       |
| 34707       | CadSNP10302    | <i>Desi</i>      | Ca_Desig_Scaffold01825       | 37465                          | (G/A)       |
| 34708       | CadSNP10303    | <i>Desi</i>      | Ca_Desig_Scaffold01825       | 37464                          | (C/T)       |
| 34709       | CadSNP10304    | <i>Desi</i>      | Ca_Desig_Scaffold01826       | 43500                          | (G/A)       |
| 34710       | CadSNP10305    | <i>Desi</i>      | Ca_Desig_Scaffold01826       | 43492                          | (G/A)       |
| 34711       | CadSNP10306    | <i>Desi</i>      | Ca_Desig_Scaffold01826       | 48129                          | (G/T)       |
| 34712       | CadSNP10307    | <i>Desi</i>      | Ca_Desig_Scaffold01826       | 48123                          | (G/A)       |
| 34713       | CadSNP10308    | <i>Desi</i>      | Ca_Desig_Scaffold01826       | 48086                          | (G/A)       |
| 34714       | CadSNP10309    | <i>Desi</i>      | Ca_Desig_Scaffold01826       | 48080                          | (A/C)       |
| 34715       | CadSNP10310    | <i>Desi</i>      | Ca_Desig_Scaffold01828       | 10765                          | (C/T)       |
| 34716       | CadSNP10311    | <i>Desi</i>      | Ca_Desig_Scaffold01828       | 18234                          | (C/T)       |
| 34717       | CadSNP10312    | <i>Desi</i>      | Ca_Desig_Scaffold01828       | 18230                          | (G/A)       |
| 34718       | CadSNP10313    | <i>Desi</i>      | Ca_Desig_Scaffold01828       | 55508                          | (T/G)       |
| 34719       | CadSNP10314    | <i>Desi</i>      | Ca_Desig_Scaffold01829       | 142943                         | (C/T)       |
| 34720       | CadSNP10315    | <i>Desi</i>      | Ca_Desig_Scaffold01829       | 147668                         | (A/C)       |
| 34721       | CadSNP10316    | <i>Desi</i>      | Ca_Desig_Scaffold01829       | 147679                         | (C/T)       |
| 34722       | CadSNP10317    | <i>Desi</i>      | Ca_Desig_Scaffold01829       | 147706                         | (A/T)       |
| 34723       | CadSNP10318    | <i>Desi</i>      | Ca_Desig_Scaffold01829       | 150289                         | (A/G)       |
| 34724       | CadSNP10319    | <i>Desi</i>      | Ca_Desig_Scaffold01830       | 19141                          | (G/A)       |
| 34725       | CadSNP10320    | <i>Desi</i>      | Ca_Desig_Scaffold01830       | 19138                          | (A/G)       |
| 34726       | CadSNP10321    | <i>Desi</i>      | Ca_Desig_Scaffold01830       | 19132                          | (C/A)       |
| 34727       | CadSNP10322    | <i>Desi</i>      | Ca_Desig_Scaffold01830       | 19126                          | (G/A)       |
| 34728       | CadSNP10323    | <i>Desi</i>      | Ca_Desig_Scaffold01830       | 19123                          | (T/C)       |
| 34729       | CadSNP10324    | <i>Desi</i>      | Ca_Desig_Scaffold01830       | 19117                          | (G/T)       |
| 34730       | CadSNP10325    | <i>Desi</i>      | Ca_Desig_Scaffold01830       | 19095                          | (G/T)       |
| 34731       | CadSNP10326    | <i>Desi</i>      | Ca_Desig_Scaffold01839       | 32997                          | (A/G)       |

| <b>S.N.</b> | <b>SNP IDs</b> | <b>Cultivars</b> | <b>Chromosomes/scaffolds</b> | <b>Physical positions (bp)</b> | <b>SNPs</b> |
|-------------|----------------|------------------|------------------------------|--------------------------------|-------------|
| 34732       | CadSNP10327    | <i>Desi</i>      | Ca_Desig_Scaffold01840       | 6703                           | (C/G)       |
| 34733       | CadSNP10328    | <i>Desi</i>      | Ca_Desig_Scaffold01840       | 6813                           | (T/A)       |
| 34734       | CadSNP10329    | <i>Desi</i>      | Ca_Desig_Scaffold01841       | 27458                          | (A/G)       |
| 34735       | CadSNP10330    | <i>Desi</i>      | Ca_Desig_Scaffold01842       | 48872                          | (G/T)       |
| 34736       | CadSNP10331    | <i>Desi</i>      | Ca_Desig_Scaffold01846       | 35108                          | (C/T)       |
| 34737       | CadSNP10332    | <i>Desi</i>      | Ca_Desig_Scaffold01850       | 16252                          | (A/G)       |
| 34738       | CadSNP10333    | <i>Desi</i>      | Ca_Desig_Scaffold01850       | 29766                          | (T/C)       |
| 34739       | CadSNP10334    | <i>Desi</i>      | Ca_Desig_Scaffold01850       | 29753                          | (T/A)       |
| 34740       | CadSNP10335    | <i>Desi</i>      | Ca_Desig_Scaffold01850       | 29689                          | (A/G)       |
| 34741       | CadSNP10336    | <i>Desi</i>      | Ca_Desig_Scaffold01850       | 31048                          | (G/A)       |
| 34742       | CadSNP10337    | <i>Desi</i>      | Ca_Desig_Scaffold01850       | 33424                          | (C/T)       |
| 34743       | CadSNP10338    | <i>Desi</i>      | Ca_Desig_Scaffold01855       | 25712                          | (C/T)       |
| 34744       | CadSNP10339    | <i>Desi</i>      | Ca_Desig_Scaffold01856       | 31327                          | (A/G)       |
| 34745       | CadSNP10340    | <i>Desi</i>      | Ca_Desig_Scaffold01856       | 46299                          | (C/T)       |
| 34746       | CadSNP10341    | <i>Desi</i>      | Ca_Desig_Scaffold01856       | 46291                          | (G/A)       |
| 34747       | CadSNP10342    | <i>Desi</i>      | Ca_Desig_Scaffold01856       | 46283                          | (A/C)       |
| 34748       | CadSNP10343    | <i>Desi</i>      | Ca_Desig_Scaffold01856       | 48596                          | (C/T)       |
| 34749       | CadSNP10344    | <i>Desi</i>      | Ca_Desig_Scaffold01857       | 25462                          | (T/C)       |
| 34750       | CadSNP10345    | <i>Desi</i>      | Ca_Desig_Scaffold01857       | 36838                          | (G/A)       |
| 34751       | CadSNP10346    | <i>Desi</i>      | Ca_Desig_Scaffold01857       | 38718                          | (A/T)       |
| 34752       | CadSNP10347    | <i>Desi</i>      | Ca_Desig_Scaffold01857       | 38730                          | (A/T)       |
| 34753       | CadSNP10348    | <i>Desi</i>      | Ca_Desig_Scaffold01861       | 22099                          | (T/C)       |
| 34754       | CadSNP10349    | <i>Desi</i>      | Ca_Desig_Scaffold01861       | 58359                          | (T/C)       |
| 34755       | CadSNP10350    | <i>Desi</i>      | Ca_Desig_Scaffold01862       | 6065                           | (C/T)       |
| 34756       | CadSNP10351    | <i>Desi</i>      | Ca_Desig_Scaffold01872       | 53778                          | (T/G)       |
| 34757       | CadSNP10352    | <i>Desi</i>      | Ca_Desig_Scaffold01876       | 33537                          | (C/T)       |
| 34758       | CadSNP10353    | <i>Desi</i>      | Ca_Desig_Scaffold01876       | 33580                          | (C/G)       |
| 34759       | CadSNP10354    | <i>Desi</i>      | Ca_Desig_Scaffold01876       | 33606                          | (G/T)       |
| 34760       | CadSNP10355    | <i>Desi</i>      | Ca_Desig_Scaffold01876       | 49598                          | (T/C)       |
| 34761       | CadSNP10356    | <i>Desi</i>      | Ca_Desig_Scaffold01880       | 6361                           | (T/C)       |
| 34762       | CadSNP10357    | <i>Desi</i>      | Ca_Desig_Scaffold01884       | 16693                          | (G/A)       |
| 34763       | CadSNP10358    | <i>Desi</i>      | Ca_Desig_Scaffold01884       | 18520                          | (T/C)       |
| 34764       | CadSNP10359    | <i>Desi</i>      | Ca_Desig_Scaffold01885       | 12412                          | (T/C)       |
| 34765       | CadSNP10360    | <i>Desi</i>      | Ca_Desig_Scaffold01896       | 10361                          | (C/T)       |
| 34766       | CadSNP10361    | <i>Desi</i>      | Ca_Desig_Scaffold01896       | 10428                          | (G/A)       |
| 34767       | CadSNP10362    | <i>Desi</i>      | Ca_Desig_Scaffold01896       | 10611                          | (G/A)       |
| 34768       | CadSNP10363    | <i>Desi</i>      | Ca_Desig_Scaffold01896       | 10929                          | (C/T)       |
| 34769       | CadSNP10364    | <i>Desi</i>      | Ca_Desig_Scaffold01896       | 24101                          | (T/G)       |

| <b>S.N.</b> | <b>SNP IDs</b> | <b>Cultivars</b> | <b>Chromosomes/scaffolds</b> | <b>Physical positions (bp)</b> | <b>SNPs</b> |
|-------------|----------------|------------------|------------------------------|--------------------------------|-------------|
| 34770       | CadSNP10365    | <i>Desi</i>      | Ca_Desig_Scaffold01901       | 34049                          | (A/C)       |
| 34771       | CadSNP10366    | <i>Desi</i>      | Ca_Desig_Scaffold01903       | 50984                          | (A/G)       |
| 34772       | CadSNP10367    | <i>Desi</i>      | Ca_Desig_Scaffold01903       | 50983                          | (C/T)       |
| 34773       | CadSNP10368    | <i>Desi</i>      | Ca_Desig_Scaffold01903       | 50966                          | (C/T)       |
| 34774       | CadSNP10369    | <i>Desi</i>      | Ca_Desig_Scaffold01903       | 50956                          | (A/G)       |
| 34775       | CadSNP10370    | <i>Desi</i>      | Ca_Desig_Scaffold01907       | 9436                           | (T/G)       |
| 34776       | CadSNP10371    | <i>Desi</i>      | Ca_Desig_Scaffold01907       | 9463                           | (C/T)       |
| 34777       | CadSNP10372    | <i>Desi</i>      | Ca_Desig_Scaffold01907       | 11132                          | (A/G)       |
| 34778       | CadSNP10373    | <i>Desi</i>      | Ca_Desig_Scaffold01907       | 11196                          | (C/A)       |
| 34779       | CadSNP10374    | <i>Desi</i>      | Ca_Desig_Scaffold01908       | 54034                          | (A/G)       |
| 34780       | CadSNP10375    | <i>Desi</i>      | Ca_Desig_Scaffold01910       | 1640                           | (T/C)       |
| 34781       | CadSNP10376    | <i>Desi</i>      | Ca_Desig_Scaffold01910       | 30227                          | (C/G)       |
| 34782       | CadSNP10377    | <i>Desi</i>      | Ca_Desig_Scaffold01910       | 30255                          | (T/C)       |
| 34783       | CadSNP10378    | <i>Desi</i>      | Ca_Desig_Scaffold01910       | 30256                          | (G/T)       |
| 34784       | CadSNP10379    | <i>Desi</i>      | Ca_Desig_Scaffold01910       | 30260                          | (C/T)       |
| 34785       | CadSNP10380    | <i>Desi</i>      | Ca_Desig_Scaffold01910       | 30273                          | (A/T)       |
| 34786       | CadSNP10381    | <i>Desi</i>      | Ca_Desig_Scaffold01910       | 30287                          | (T/C)       |
| 34787       | CadSNP10382    | <i>Desi</i>      | Ca_Desig_Scaffold01910       | 30290                          | (T/C)       |
| 34788       | CadSNP10383    | <i>Desi</i>      | Ca_Desig_Scaffold01910       | 30304                          | (T/C)       |
| 34789       | CadSNP10384    | <i>Desi</i>      | Ca_Desig_Scaffold01910       | 46313                          | (T/C)       |
| 34790       | CadSNP10385    | <i>Desi</i>      | Ca_Desig_Scaffold01910       | 46312                          | (G/A)       |
| 34791       | CadSNP10386    | <i>Desi</i>      | Ca_Desig_Scaffold01910       | 46307                          | (T/A)       |
| 34792       | CadSNP10387    | <i>Desi</i>      | Ca_Desig_Scaffold01910       | 46298                          | (T/C)       |
| 34793       | CadSNP10388    | <i>Desi</i>      | Ca_Desig_Scaffold01910       | 46280                          | (T/G)       |
| 34794       | CadSNP10389    | <i>Desi</i>      | Ca_Desig_Scaffold01910       | 46271                          | (A/G)       |
| 34795       | CadSNP10390    | <i>Desi</i>      | Ca_Desig_Scaffold01910       | 46238                          | (T/G)       |
| 34796       | CadSNP10391    | <i>Desi</i>      | Ca_Desig_Scaffold01911       | 35307                          | (G/T)       |
| 34797       | CadSNP10392    | <i>Desi</i>      | Ca_Desig_Scaffold01911       | 35376                          | (A/G)       |
| 34798       | CadSNP10393    | <i>Desi</i>      | Ca_Desig_Scaffold01914       | 5564                           | (C/T)       |
| 34799       | CadSNP10394    | <i>Desi</i>      | Ca_Desig_Scaffold01917       | 38145                          | (C/T)       |
| 34800       | CadSNP10395    | <i>Desi</i>      | Ca_Desig_Scaffold01918       | 8604                           | (G/A)       |
| 34801       | CadSNP10396    | <i>Desi</i>      | Ca_Desig_Scaffold01918       | 8629                           | (C/A)       |
| 34802       | CadSNP10397    | <i>Desi</i>      | Ca_Desig_Scaffold01918       | 8657                           | (T/G)       |
| 34803       | CadSNP10398    | <i>Desi</i>      | Ca_Desig_Scaffold01918       | 8725                           | (C/T)       |
| 34804       | CadSNP10399    | <i>Desi</i>      | Ca_Desig_Scaffold01918       | 8708                           | (C/T)       |
| 34805       | CadSNP10400    | <i>Desi</i>      | Ca_Desig_Scaffold01918       | 8691                           | (A/C)       |
| 34806       | CadSNP10401    | <i>Desi</i>      | Ca_Desig_Scaffold01918       | 8686                           | (G/C)       |
| 34807       | CadSNP10402    | <i>Desi</i>      | Ca_Desig_Scaffold01918       | 8685                           | (C/T)       |

| <b>S.N.</b> | <b>SNP IDs</b> | <b>Cultivars</b> | <b>Chromosomes/scaffolds</b> | <b>Physical positions (bp)</b> | <b>SNPs</b> |
|-------------|----------------|------------------|------------------------------|--------------------------------|-------------|
| 34808       | CadSNP10403    | <i>Desi</i>      | Ca_Desig_Scaffold01918       | 9250                           | (A/C)       |
| 34809       | CadSNP10404    | <i>Desi</i>      | Ca_Desig_Scaffold01918       | 9252                           | (C/T)       |
| 34810       | CadSNP10405    | <i>Desi</i>      | Ca_Desig_Scaffold01918       | 9318                           | (G/A)       |
| 34811       | CadSNP10406    | <i>Desi</i>      | Ca_Desig_Scaffold01918       | 9369                           | (C/A)       |
| 34812       | CadSNP10407    | <i>Desi</i>      | Ca_Desig_Scaffold01918       | 9400                           | (T/C)       |
| 34813       | CadSNP10408    | <i>Desi</i>      | Ca_Desig_Scaffold01918       | 9413                           | (G/A)       |
| 34814       | CadSNP10409    | <i>Desi</i>      | Ca_Desig_Scaffold01918       | 9419                           | (G/A)       |
| 34815       | CadSNP10410    | <i>Desi</i>      | Ca_Desig_Scaffold01918       | 25272                          | (G/A)       |
| 34816       | CadSNP10411    | <i>Desi</i>      | Ca_Desig_Scaffold01924       | 20481                          | (T/A)       |
| 34817       | CadSNP10412    | <i>Desi</i>      | Ca_Desig_Scaffold01924       | 20497                          | (A/G)       |
| 34818       | CadSNP10413    | <i>Desi</i>      | Ca_Desig_Scaffold01924       | 20518                          | (T/G)       |
| 34819       | CadSNP10414    | <i>Desi</i>      | Ca_Desig_Scaffold01924       | 20526                          | (T/G)       |
| 34820       | CadSNP10415    | <i>Desi</i>      | Ca_Desig_Scaffold01924       | 56817                          | (C/A)       |
| 34821       | CadSNP10416    | <i>Desi</i>      | Ca_Desig_Scaffold01924       | 56779                          | (G/A)       |
| 34822       | CadSNP10417    | <i>Desi</i>      | Ca_Desig_Scaffold01924       | 56756                          | (C/T)       |
| 34823       | CadSNP10418    | <i>Desi</i>      | Ca_Desig_Scaffold01924       | 62471                          | (A/G)       |
| 34824       | CadSNP10419    | <i>Desi</i>      | Ca_Desig_Scaffold01924       | 62450                          | (T/A)       |
| 34825       | CadSNP10420    | <i>Desi</i>      | Ca_Desig_Scaffold01927       | 29533                          | (C/T)       |
| 34826       | CadSNP10421    | <i>Desi</i>      | Ca_Desig_Scaffold01927       | 29626                          | (G/T)       |
| 34827       | CadSNP10422    | <i>Desi</i>      | Ca_Desig_Scaffold01927       | 29607                          | (T/G)       |
| 34828       | CadSNP10423    | <i>Desi</i>      | Ca_Desig_Scaffold01927       | 29697                          | (G/A)       |
| 34829       | CadSNP10424    | <i>Desi</i>      | Ca_Desig_Scaffold01927       | 29690                          | (G/A)       |
| 34830       | CadSNP10425    | <i>Desi</i>      | Ca_Desig_Scaffold01929       | 50836                          | (C/A)       |
| 34831       | CadSNP10426    | <i>Desi</i>      | Ca_Desig_Scaffold01935       | 17422                          | (A/C)       |
| 34832       | CadSNP10427    | <i>Desi</i>      | Ca_Desig_Scaffold01937       | 8221                           | (G/A)       |
| 34833       | CadSNP10428    | <i>Desi</i>      | Ca_Desig_Scaffold01937       | 8146                           | (C/T)       |
| 34834       | CadSNP10429    | <i>Desi</i>      | Ca_Desig_Scaffold01937       | 8281                           | (C/T)       |
| 34835       | CadSNP10430    | <i>Desi</i>      | Ca_Desig_Scaffold01937       | 10395                          | (T/C)       |
| 34836       | CadSNP10431    | <i>Desi</i>      | Ca_Desig_Scaffold01937       | 10469                          | (T/G)       |
| 34837       | CadSNP10432    | <i>Desi</i>      | Ca_Desig_Scaffold01937       | 55399                          | (C/T)       |
| 34838       | CadSNP10433    | <i>Desi</i>      | Ca_Desig_Scaffold01937       | 55410                          | (G/A)       |
| 34839       | CadSNP10434    | <i>Desi</i>      | Ca_Desig_Scaffold01947       | 38811                          | (T/G)       |
| 34840       | CadSNP10435    | <i>Desi</i>      | Ca_Desig_Scaffold01947       | 38852                          | (C/T)       |
| 34841       | CadSNP10436    | <i>Desi</i>      | Ca_Desig_Scaffold01948       | 30282                          | (G/A)       |
| 34842       | CadSNP10437    | <i>Desi</i>      | Ca_Desig_Scaffold01949       | 68784                          | (T/A)       |
| 34843       | CadSNP10438    | <i>Desi</i>      | Ca_Desig_Scaffold01950       | 33739                          | (A/G)       |
| 34844       | CadSNP10439    | <i>Desi</i>      | Ca_Desig_Scaffold01950       | 33763                          | (A/C)       |
| 34845       | CadSNP10440    | <i>Desi</i>      | Ca_Desig_Scaffold01950       | 33809                          | (T/C)       |

| <b>S.N.</b> | <b>SNP IDs</b> | <b>Cultivars</b> | <b>Chromosomes/scaffolds</b> | <b>Physical positions (bp)</b> | <b>SNPs</b> |
|-------------|----------------|------------------|------------------------------|--------------------------------|-------------|
| 34846       | CadSNP10441    | <i>Desi</i>      | Ca_Desig_Scaffold01956       | 50330                          | (A/G)       |
| 34847       | CadSNP10442    | <i>Desi</i>      | Ca_Desig_Scaffold01956       | 50328                          | (C/T)       |
| 34848       | CadSNP10443    | <i>Desi</i>      | Ca_Desig_Scaffold01956       | 50321                          | (T/C)       |
| 34849       | CadSNP10444    | <i>Desi</i>      | Ca_Desig_Scaffold01956       | 50316                          | (A/C)       |
| 34850       | CadSNP10445    | <i>Desi</i>      | Ca_Desig_Scaffold01956       | 52468                          | (C/T)       |
| 34851       | CadSNP10446    | <i>Desi</i>      | Ca_Desig_Scaffold01959       | 29190                          | (G/A)       |
| 34852       | CadSNP10447    | <i>Desi</i>      | Ca_Desig_Scaffold01962       | 26238                          | (C/G)       |
| 34853       | CadSNP10448    | <i>Desi</i>      | Ca_Desig_Scaffold01962       | 26237                          | (G/A)       |
| 34854       | CadSNP10449    | <i>Desi</i>      | Ca_Desig_Scaffold01962       | 39508                          | (T/C)       |
| 34855       | CadSNP10450    | <i>Desi</i>      | Ca_Desig_Scaffold01965       | 3017                           | (G/A)       |
| 34856       | CadSNP10451    | <i>Desi</i>      | Ca_Desig_Scaffold01965       | 9794                           | (G/A)       |
| 34857       | CadSNP10452    | <i>Desi</i>      | Ca_Desig_Scaffold01968       | 3952                           | (C/T)       |
| 34858       | CadSNP10453    | <i>Desi</i>      | Ca_Desig_Scaffold01968       | 22368                          | (A/G)       |
| 34859       | CadSNP10454    | <i>Desi</i>      | Ca_Desig_Scaffold01968       | 22391                          | (G/A)       |
| 34860       | CadSNP10455    | <i>Desi</i>      | Ca_Desig_Scaffold01972       | 16128                          | (A/G)       |
| 34861       | CadSNP10456    | <i>Desi</i>      | Ca_Desig_Scaffold01972       | 52905                          | (A/T)       |
| 34862       | CadSNP10457    | <i>Desi</i>      | Ca_Desig_Scaffold01977       | 17782                          | (C/T)       |
| 34863       | CadSNP10458    | <i>Desi</i>      | Ca_Desig_Scaffold01984       | 1860                           | (G/T)       |
| 34864       | CadSNP10459    | <i>Desi</i>      | Ca_Desig_Scaffold01985       | 70754                          | (A/T)       |
| 34865       | CadSNP10460    | <i>Desi</i>      | Ca_Desig_Scaffold01985       | 70767                          | (C/T)       |
| 34866       | CadSNP10461    | <i>Desi</i>      | Ca_Desig_Scaffold01985       | 70771                          | (G/A)       |
| 34867       | CadSNP10462    | <i>Desi</i>      | Ca_Desig_Scaffold01985       | 70777                          | (T/C)       |
| 34868       | CadSNP10463    | <i>Desi</i>      | Ca_Desig_Scaffold01985       | 70780                          | (T/A)       |
| 34869       | CadSNP10464    | <i>Desi</i>      | Ca_Desig_Scaffold01985       | 70795                          | (C/T)       |
| 34870       | CadSNP10465    | <i>Desi</i>      | Ca_Desig_Scaffold01985       | 70786                          | (G/A)       |
| 34871       | CadSNP10466    | <i>Desi</i>      | Ca_Desig_Scaffold01985       | 70747                          | (C/T)       |
| 34872       | CadSNP10467    | <i>Desi</i>      | Ca_Desig_Scaffold01985       | 70744                          | (T/C)       |
| 34873       | CadSNP10468    | <i>Desi</i>      | Ca_Desig_Scaffold01986       | 15829                          | (C/G)       |
| 34874       | CadSNP10469    | <i>Desi</i>      | Ca_Desig_Scaffold01989       | 15556                          | (T/C)       |
| 34875       | CadSNP10470    | <i>Desi</i>      | Ca_Desig_Scaffold01989       | 15560                          | (G/T)       |
| 34876       | CadSNP10471    | <i>Desi</i>      | Ca_Desig_Scaffold01992       | 38831                          | (T/C)       |
| 34877       | CadSNP10472    | <i>Desi</i>      | Ca_Desig_Scaffold02003       | 43468                          | (C/A)       |
| 34878       | CadSNP10473    | <i>Desi</i>      | Ca_Desig_Scaffold02003       | 43470                          | (T/C)       |
| 34879       | CadSNP10474    | <i>Desi</i>      | Ca_Desig_Scaffold02009       | 106259                         | (T/G)       |
| 34880       | CadSNP10475    | <i>Desi</i>      | Ca_Desig_Scaffold02009       | 109275                         | (C/T)       |
| 34881       | CadSNP10476    | <i>Desi</i>      | Ca_Desig_Scaffold02009       | 109252                         | (A/G)       |
| 34882       | CadSNP10477    | <i>Desi</i>      | Ca_Desig_Scaffold02017       | 39599                          | (T/C)       |
| 34883       | CadSNP10478    | <i>Desi</i>      | Ca_Desig_Scaffold02017       | 39667                          | (T/C)       |



| <b>S.N.</b> | <b>SNP IDs</b> | <b>Cultivars</b> | <b>Chromosomes/scaffolds</b> | <b>Physical positions (bp)</b> | <b>SNPs</b> |
|-------------|----------------|------------------|------------------------------|--------------------------------|-------------|
| 34884       | CadSNP10479    | <i>Desi</i>      | Ca_Desig_Scaffold02017       | 40347                          | (T/C)       |
| 34885       | CadSNP10480    | <i>Desi</i>      | Ca_Desig_Scaffold02017       | 42397                          | (A/G)       |
| 34886       | CadSNP10481    | <i>Desi</i>      | Ca_Desig_Scaffold02017       | 42406                          | (C/G)       |
| 34887       | CadSNP10482    | <i>Desi</i>      | Ca_Desig_Scaffold02017       | 42478                          | (G/C)       |
| 34888       | CadSNP10483    | <i>Desi</i>      | Ca_Desig_Scaffold02019       | 6302                           | (G/A)       |
| 34889       | CadSNP10484    | <i>Desi</i>      | Ca_Desig_Scaffold02019       | 8846                           | (A/C)       |
| 34890       | CadSNP10485    | <i>Desi</i>      | Ca_Desig_Scaffold02025       | 7634                           | (A/T)       |
| 34891       | CadSNP10486    | <i>Desi</i>      | Ca_Desig_Scaffold02025       | 35174                          | (G/A)       |
| 34892       | CadSNP10487    | <i>Desi</i>      | Ca_Desig_Scaffold02025       | 35186                          | (A/G)       |
| 34893       | CadSNP10488    | <i>Desi</i>      | Ca_Desig_Scaffold02025       | 35206                          | (C/G)       |
| 34894       | CadSNP10489    | <i>Desi</i>      | Ca_Desig_Scaffold02025       | 35246                          | (T/C)       |
| 34895       | CadSNP10490    | <i>Desi</i>      | Ca_Desig_Scaffold02025       | 49356                          | (C/T)       |
| 34896       | CadSNP10491    | <i>Desi</i>      | Ca_Desig_Scaffold02025       | 50372                          | (C/G)       |
| 34897       | CadSNP10492    | <i>Desi</i>      | Ca_Desig_Scaffold02025       | 50324                          | (G/A)       |
| 34898       | CadSNP10493    | <i>Desi</i>      | Ca_Desig_Scaffold02025       | 50381                          | (C/A)       |
| 34899       | CadSNP10494    | <i>Desi</i>      | Ca_Desig_Scaffold02032       | 34923                          | (T/C)       |
| 34900       | CadSNP10495    | <i>Desi</i>      | Ca_Desig_Scaffold02032       | 49510                          | (G/A)       |
| 34901       | CadSNP10496    | <i>Desi</i>      | Ca_Desig_Scaffold02032       | 89299                          | (G/A)       |
| 34902       | CadSNP10497    | <i>Desi</i>      | Ca_Desig_Scaffold02032       | 97641                          | (A/G)       |
| 34903       | CadSNP10498    | <i>Desi</i>      | Ca_Desig_Scaffold02034       | 27121                          | (G/T)       |
| 34904       | CadSNP10499    | <i>Desi</i>      | Ca_Desig_Scaffold02034       | 27197                          | (C/A)       |
| 34905       | CadSNP10500    | <i>Desi</i>      | Ca_Desig_Scaffold02035       | 19358                          | (A/T)       |
| 34906       | CadSNP10501    | <i>Desi</i>      | Ca_Desig_Scaffold02036       | 74459                          | (C/A)       |
| 34907       | CadSNP10502    | <i>Desi</i>      | Ca_Desig_Scaffold02038       | 8924                           | (C/T)       |
| 34908       | CadSNP10503    | <i>Desi</i>      | Ca_Desig_Scaffold02038       | 8948                           | (C/A)       |
| 34909       | CadSNP10504    | <i>Desi</i>      | Ca_Desig_Scaffold02038       | 30225                          | (G/A)       |
| 34910       | CadSNP10505    | <i>Desi</i>      | Ca_Desig_Scaffold02038       | 30281                          | (C/G)       |
| 34911       | CadSNP10506    | <i>Desi</i>      | Ca_Desig_Scaffold02051       | 46103                          | (T/C)       |
| 34912       | CadSNP10507    | <i>Desi</i>      | Ca_Desig_Scaffold02058       | 19219                          | (T/G)       |
| 34913       | CadSNP10508    | <i>Desi</i>      | Ca_Desig_Scaffold02058       | 26543                          | (C/T)       |
| 34914       | CadSNP10509    | <i>Desi</i>      | Ca_Desig_Scaffold02058       | 26590                          | (T/C)       |
| 34915       | CadSNP10510    | <i>Desi</i>      | Ca_Desig_Scaffold02058       | 28510                          | (A/T)       |
| 34916       | CadSNP10511    | <i>Desi</i>      | Ca_Desig_Scaffold02058       | 28502                          | (G/A)       |
| 34917       | CadSNP10512    | <i>Desi</i>      | Ca_Desig_Scaffold02058       | 28590                          | (C/A)       |
| 34918       | CadSNP10513    | <i>Desi</i>      | Ca_Desig_Scaffold02058       | 28593                          | (A/G)       |
| 34919       | CadSNP10514    | <i>Desi</i>      | Ca_Desig_Scaffold02060       | 622                            | (A/C)       |
| 34920       | CadSNP10515    | <i>Desi</i>      | Ca_Desig_Scaffold02060       | 7372                           | (T/C)       |
| 34921       | CadSNP10516    | <i>Desi</i>      | Ca_Desig_Scaffold02060       | 7552                           | (A/G)       |

| <b>S.N.</b> | <b>SNP IDs</b> | <b>Cultivars</b> | <b>Chromosomes/scaffolds</b> | <b>Physical positions (bp)</b> | <b>SNPs</b> |
|-------------|----------------|------------------|------------------------------|--------------------------------|-------------|
| 34922       | CadSNP10517    | <i>Desi</i>      | Ca_Desig_Scaffold02060       | 7544                           | (A/T)       |
| 34923       | CadSNP10518    | <i>Desi</i>      | Ca_Desig_Scaffold02060       | 16254                          | (A/C)       |
| 34924       | CadSNP10519    | <i>Desi</i>      | Ca_Desig_Scaffold02060       | 17888                          | (T/G)       |
| 34925       | CadSNP10520    | <i>Desi</i>      | Ca_Desig_Scaffold02060       | 43358                          | (T/G)       |
| 34926       | CadSNP10521    | <i>Desi</i>      | Ca_Desig_Scaffold02069       | 7548                           | (T/C)       |
| 34927       | CadSNP10522    | <i>Desi</i>      | Ca_Desig_Scaffold02069       | 7592                           | (C/A)       |
| 34928       | CadSNP10523    | <i>Desi</i>      | Ca_Desig_Scaffold02071       | 17201                          | (T/C)       |
| 34929       | CadSNP10524    | <i>Desi</i>      | Ca_Desig_Scaffold02074       | 40986                          | (T/A)       |
| 34930       | CadSNP10525    | <i>Desi</i>      | Ca_Desig_Scaffold02076       | 21998                          | (A/C)       |
| 34931       | CadSNP10526    | <i>Desi</i>      | Ca_Desig_Scaffold02084       | 2056                           | (T/A)       |
| 34932       | CadSNP10527    | <i>Desi</i>      | Ca_Desig_Scaffold02084       | 2053                           | (A/T)       |
| 34933       | CadSNP10528    | <i>Desi</i>      | Ca_Desig_Scaffold02085       | 13214                          | (T/A)       |
| 34934       | CadSNP10529    | <i>Desi</i>      | Ca_Desig_Scaffold02085       | 24449                          | (G/T)       |
| 34935       | CadSNP10530    | <i>Desi</i>      | Ca_Desig_Scaffold02085       | 24455                          | (G/C)       |
| 34936       | CadSNP10531    | <i>Desi</i>      | Ca_Desig_Scaffold02086       | 50782                          | (A/G)       |
| 34937       | CadSNP10532    | <i>Desi</i>      | Ca_Desig_Scaffold02088       | 43907                          | (C/T)       |
| 34938       | CadSNP10533    | <i>Desi</i>      | Ca_Desig_Scaffold02088       | 52169                          | (T/C)       |
| 34939       | CadSNP10534    | <i>Desi</i>      | Ca_Desig_Scaffold02088       | 52197                          | (A/T)       |
| 34940       | CadSNP10535    | <i>Desi</i>      | Ca_Desig_Scaffold02088       | 52291                          | (A/G)       |
| 34941       | CadSNP10536    | <i>Desi</i>      | Ca_Desig_Scaffold02088       | 52405                          | (C/A)       |
| 34942       | CadSNP10537    | <i>Desi</i>      | Ca_Desig_Scaffold02088       | 52427                          | (G/A)       |
| 34943       | CadSNP10538    | <i>Desi</i>      | Ca_Desig_Scaffold02091       | 52776                          | (A/G)       |
| 34944       | CadSNP10539    | <i>Desi</i>      | Ca_Desig_Scaffold02091       | 52773                          | (G/C)       |
| 34945       | CadSNP10540    | <i>Desi</i>      | Ca_Desig_Scaffold02091       | 52765                          | (G/A)       |
| 34946       | CadSNP10541    | <i>Desi</i>      | Ca_Desig_Scaffold02091       | 52886                          | (G/C)       |
| 34947       | CadSNP10542    | <i>Desi</i>      | Ca_Desig_Scaffold02093       | 113080                         | (G/T)       |
| 34948       | CadSNP10543    | <i>Desi</i>      | Ca_Desig_Scaffold02093       | 113082                         | (T/C)       |
| 34949       | CadSNP10544    | <i>Desi</i>      | Ca_Desig_Scaffold02093       | 113089                         | (A/G)       |
| 34950       | CadSNP10545    | <i>Desi</i>      | Ca_Desig_Scaffold02093       | 113105                         | (C/A)       |
| 34951       | CadSNP10546    | <i>Desi</i>      | Ca_Desig_Scaffold02093       | 113133                         | (T/A)       |
| 34952       | CadSNP10547    | <i>Desi</i>      | Ca_Desig_Scaffold02093       | 113084                         | (T/C)       |
| 34953       | CadSNP10548    | <i>Desi</i>      | Ca_Desig_Scaffold02093       | 115924                         | (G/A)       |
| 34954       | CadSNP10549    | <i>Desi</i>      | Ca_Desig_Scaffold02093       | 115951                         | (G/T)       |
| 34955       | CadSNP10550    | <i>Desi</i>      | Ca_Desig_Scaffold02093       | 115964                         | (G/A)       |
| 34956       | CadSNP10551    | <i>Desi</i>      | Ca_Desig_Scaffold02095       | 4277                           | (C/A)       |
| 34957       | CadSNP10552    | <i>Desi</i>      | Ca_Desig_Scaffold02095       | 32519                          | (A/G)       |
| 34958       | CadSNP10553    | <i>Desi</i>      | Ca_Desig_Scaffold02095       | 32547                          | (T/G)       |
| 34959       | CadSNP10554    | <i>Desi</i>      | Ca_Desig_Scaffold02095       | 32550                          | (A/T)       |

| <b>S.N.</b> | <b>SNP IDs</b> | <b>Cultivars</b> | <b>Chromosomes/scaffolds</b> | <b>Physical positions (bp)</b> | <b>SNPs</b> |
|-------------|----------------|------------------|------------------------------|--------------------------------|-------------|
| 34960       | CadSNP10555    | <i>Desi</i>      | Ca_Desig_Scaffold02095       | 32560                          | (C/A)       |
| 34961       | CadSNP10556    | <i>Desi</i>      | Ca_Desig_Scaffold02095       | 38451                          | (T/G)       |
| 34962       | CadSNP10557    | <i>Desi</i>      | Ca_Desig_Scaffold02095       | 38555                          | (C/A)       |
| 34963       | CadSNP10558    | <i>Desi</i>      | Ca_Desig_Scaffold02095       | 38627                          | (G/T)       |
| 34964       | CadSNP10559    | <i>Desi</i>      | Ca_Desig_Scaffold02097       | 3347                           | (G/A)       |
| 34965       | CadSNP10560    | <i>Desi</i>      | Ca_Desig_Scaffold02097       | 3967                           | (A/C)       |
| 34966       | CadSNP10561    | <i>Desi</i>      | Ca_Desig_Scaffold02097       | 4491                           | (G/T)       |
| 34967       | CadSNP10562    | <i>Desi</i>      | Ca_Desig_Scaffold02097       | 4507                           | (A/G)       |
| 34968       | CadSNP10563    | <i>Desi</i>      | Ca_Desig_Scaffold02098       | 37277                          | (A/C)       |
| 34969       | CadSNP10564    | <i>Desi</i>      | Ca_Desig_Scaffold02103       | 15896                          | (A/G)       |
| 34970       | CadSNP10565    | <i>Desi</i>      | Ca_Desig_Scaffold02103       | 15914                          | (T/G)       |
| 34971       | CadSNP10566    | <i>Desi</i>      | Ca_Desig_Scaffold02103       | 16042                          | (A/G)       |
| 34972       | CadSNP10567    | <i>Desi</i>      | Ca_Desig_Scaffold02103       | 16033                          | (G/T)       |
| 34973       | CadSNP10568    | <i>Desi</i>      | Ca_Desig_Scaffold02111       | 126201                         | (A/G)       |
| 34974       | CadSNP10569    | <i>Desi</i>      | Ca_Desig_Scaffold02114       | 38150                          | (T/G)       |
| 34975       | CadSNP10570    | <i>Desi</i>      | Ca_Desig_Scaffold02114       | 40465                          | (T/G)       |
| 34976       | CadSNP10571    | <i>Desi</i>      | Ca_Desig_Scaffold02116       | 3064                           | (T/C)       |
| 34977       | CadSNP10572    | <i>Desi</i>      | Ca_Desig_Scaffold02119       | 24622                          | (T/G)       |
| 34978       | CadSNP10573    | <i>Desi</i>      | Ca_Desig_Scaffold02119       | 25591                          | (G/A)       |
| 34979       | CadSNP10574    | <i>Desi</i>      | Ca_Desig_Scaffold02119       | 25584                          | (T/A)       |
| 34980       | CadSNP10575    | <i>Desi</i>      | Ca_Desig_Scaffold02119       | 25601                          | (A/C)       |
| 34981       | CadSNP10576    | <i>Desi</i>      | Ca_Desig_Scaffold02120       | 29467                          | (C/A)       |
| 34982       | CadSNP10577    | <i>Desi</i>      | Ca_Desig_Scaffold02120       | 47499                          | (T/A)       |
| 34983       | CadSNP10578    | <i>Desi</i>      | Ca_Desig_Scaffold02120       | 47601                          | (A/G)       |
| 34984       | CadSNP10579    | <i>Desi</i>      | Ca_Desig_Scaffold02120       | 47609                          | (G/T)       |
| 34985       | CadSNP10580    | <i>Desi</i>      | Ca_Desig_Scaffold02120       | 47620                          | (G/T)       |
| 34986       | CadSNP10581    | <i>Desi</i>      | Ca_Desig_Scaffold02120       | 47685                          | (A/G)       |
| 34987       | CadSNP10582    | <i>Desi</i>      | Ca_Desig_Scaffold02120       | 47637                          | (T/A)       |
| 34988       | CadSNP10583    | <i>Desi</i>      | Ca_Desig_Scaffold02123       | 15191                          | (A/G)       |
| 34989       | CadSNP10584    | <i>Desi</i>      | Ca_Desig_Scaffold02127       | 7453                           | (A/T)       |
| 34990       | CadSNP10585    | <i>Desi</i>      | Ca_Desig_Scaffold02127       | 7479                           | (T/A)       |
| 34991       | CadSNP10586    | <i>Desi</i>      | Ca_Desig_Scaffold02127       | 7497                           | (C/T)       |
| 34992       | CadSNP10587    | <i>Desi</i>      | Ca_Desig_Scaffold02127       | 7511                           | (G/C)       |
| 34993       | CadSNP10588    | <i>Desi</i>      | Ca_Desig_Scaffold02128       | 32051                          | (A/G)       |
| 34994       | CadSNP10589    | <i>Desi</i>      | Ca_Desig_Scaffold02129       | 45248                          | (C/G)       |
| 34995       | CadSNP10590    | <i>Desi</i>      | Ca_Desig_Scaffold02129       | 45282                          | (C/T)       |
| 34996       | CadSNP10591    | <i>Desi</i>      | Ca_Desig_Scaffold02129       | 45920                          | (A/T)       |
| 34997       | CadSNP10592    | <i>Desi</i>      | Ca_Desig_Scaffold02133       | 15592                          | (C/A)       |

| <b>S.N.</b> | <b>SNP IDs</b> | <b>Cultivars</b> | <b>Chromosomes/scaffolds</b> | <b>Physical positions (bp)</b> | <b>SNPs</b> |
|-------------|----------------|------------------|------------------------------|--------------------------------|-------------|
| 34998       | CadSNP10593    | <i>Desi</i>      | Ca_Desig_Scaffold02133       | 15570                          | (T/C)       |
| 34999       | CadSNP10594    | <i>Desi</i>      | Ca_Desig_Scaffold02133       | 15562                          | (G/A)       |
| 35000       | CadSNP10595    | <i>Desi</i>      | Ca_Desig_Scaffold02133       | 15533                          | (A/G)       |
| 35001       | CadSNP10596    | <i>Desi</i>      | Ca_Desig_Scaffold02133       | 15657                          | (C/A)       |
| 35002       | CadSNP10597    | <i>Desi</i>      | Ca_Desig_Scaffold02133       | 29168                          | (C/T)       |
| 35003       | CadSNP10598    | <i>Desi</i>      | Ca_Desig_Scaffold02133       | 30876                          | (A/G)       |
| 35004       | CadSNP10599    | <i>Desi</i>      | Ca_Desig_Scaffold02133       | 30880                          | (A/T)       |
| 35005       | CadSNP10600    | <i>Desi</i>      | Ca_Desig_Scaffold02133       | 37689                          | (A/G)       |
| 35006       | CadSNP10601    | <i>Desi</i>      | Ca_Desig_Scaffold02136       | 19060                          | (G/A)       |
| 35007       | CadSNP10602    | <i>Desi</i>      | Ca_Desig_Scaffold02136       | 19555                          | (A/G)       |
| 35008       | CadSNP10603    | <i>Desi</i>      | Ca_Desig_Scaffold02136       | 19693                          | (G/A)       |
| 35009       | CadSNP10604    | <i>Desi</i>      | Ca_Desig_Scaffold02136       | 19621                          | (G/A)       |
| 35010       | CadSNP10605    | <i>Desi</i>      | Ca_Desig_Scaffold02136       | 19900                          | (C/T)       |
| 35011       | CadSNP10606    | <i>Desi</i>      | Ca_Desig_Scaffold02141       | 21724                          | (C/A)       |
| 35012       | CadSNP10607    | <i>Desi</i>      | Ca_Desig_Scaffold02141       | 46924                          | (T/C)       |
| 35013       | CadSNP10608    | <i>Desi</i>      | Ca_Desig_Scaffold02141       | 49139                          | (T/C)       |
| 35014       | CadSNP10609    | <i>Desi</i>      | Ca_Desig_Scaffold02141       | 49144                          | (A/T)       |
| 35015       | CadSNP10610    | <i>Desi</i>      | Ca_Desig_Scaffold02142       | 26302                          | (A/C)       |
| 35016       | CadSNP10611    | <i>Desi</i>      | Ca_Desig_Scaffold02142       | 26488                          | (C/T)       |
| 35017       | CadSNP10612    | <i>Desi</i>      | Ca_Desig_Scaffold02142       | 30162                          | (A/G)       |
| 35018       | CadSNP10613    | <i>Desi</i>      | Ca_Desig_Scaffold02142       | 30207                          | (T/A)       |
| 35019       | CadSNP10614    | <i>Desi</i>      | Ca_Desig_Scaffold02144       | 23361                          | (G/T)       |
| 35020       | CadSNP10615    | <i>Desi</i>      | Ca_Desig_Scaffold02144       | 37313                          | (A/G)       |
| 35021       | CadSNP10616    | <i>Desi</i>      | Ca_Desig_Scaffold02145       | 26633                          | (T/C)       |
| 35022       | CadSNP10617    | <i>Desi</i>      | Ca_Desig_Scaffold02145       | 28251                          | (A/G)       |
| 35023       | CadSNP10618    | <i>Desi</i>      | Ca_Desig_Scaffold02147       | 10201                          | (C/A)       |
| 35024       | CadSNP10619    | <i>Desi</i>      | Ca_Desig_Scaffold02148       | 13771                          | (G/A)       |
| 35025       | CadSNP10620    | <i>Desi</i>      | Ca_Desig_Scaffold02148       | 13808                          | (A/G)       |
| 35026       | CadSNP10621    | <i>Desi</i>      | Ca_Desig_Scaffold02148       | 13896                          | (A/T)       |
| 35027       | CadSNP10622    | <i>Desi</i>      | Ca_Desig_Scaffold02148       | 33271                          | (G/A)       |
| 35028       | CadSNP10623    | <i>Desi</i>      | Ca_Desig_Scaffold02148       | 33278                          | (T/C)       |
| 35029       | CadSNP10624    | <i>Desi</i>      | Ca_Desig_Scaffold02148       | 33294                          | (T/C)       |
| 35030       | CadSNP10625    | <i>Desi</i>      | Ca_Desig_Scaffold02148       | 33295                          | (C/A)       |
| 35031       | CadSNP10626    | <i>Desi</i>      | Ca_Desig_Scaffold02148       | 33354                          | (T/A)       |
| 35032       | CadSNP10627    | <i>Desi</i>      | Ca_Desig_Scaffold02148       | 33457                          | (C/A)       |
| 35033       | CadSNP10628    | <i>Desi</i>      | Ca_Desig_Scaffold02148       | 33432                          | (T/A)       |
| 35034       | CadSNP10629    | <i>Desi</i>      | Ca_Desig_Scaffold02148       | 33428                          | (T/A)       |
| 35035       | CadSNP10630    | <i>Desi</i>      | Ca_Desig_Scaffold02148       | 33381                          | (C/G)       |

| <b>S.N.</b> | <b>SNP IDs</b> | <b>Cultivars</b> | <b>Chromosomes/scaffolds</b> | <b>Physical positions (bp)</b> | <b>SNPs</b> |
|-------------|----------------|------------------|------------------------------|--------------------------------|-------------|
| 35036       | CadSNP10631    | <i>Desi</i>      | Ca_Desig_Scaffold02148       | 33377                          | (C/T)       |
| 35037       | CadSNP10632    | <i>Desi</i>      | Ca_Desig_Scaffold02154       | 7405                           | (A/G)       |
| 35038       | CadSNP10633    | <i>Desi</i>      | Ca_Desig_Scaffold02154       | 11362                          | (T/A)       |
| 35039       | CadSNP10634    | <i>Desi</i>      | Ca_Desig_Scaffold02154       | 11334                          | (C/A)       |
| 35040       | CadSNP10635    | <i>Desi</i>      | Ca_Desig_Scaffold02156       | 26159                          | (C/T)       |
| 35041       | CadSNP10636    | <i>Desi</i>      | Ca_Desig_Scaffold02159       | 27445                          | (C/A)       |
| 35042       | CadSNP10637    | <i>Desi</i>      | Ca_Desig_Scaffold02163       | 40061                          | (C/G)       |
| 35043       | CadSNP10638    | <i>Desi</i>      | Ca_Desig_Scaffold02165       | 47354                          | (A/T)       |
| 35044       | CadSNP10639    | <i>Desi</i>      | Ca_Desig_Scaffold02168       | 45757                          | (T/C)       |
| 35045       | CadSNP10640    | <i>Desi</i>      | Ca_Desig_Scaffold02168       | 45930                          | (C/T)       |
| 35046       | CadSNP10641    | <i>Desi</i>      | Ca_Desig_Scaffold02168       | 45933                          | (G/T)       |
| 35047       | CadSNP10642    | <i>Desi</i>      | Ca_Desig_Scaffold02168       | 45942                          | (C/T)       |
| 35048       | CadSNP10643    | <i>Desi</i>      | Ca_Desig_Scaffold02168       | 45966                          | (C/T)       |
| 35049       | CadSNP10644    | <i>Desi</i>      | Ca_Desig_Scaffold02168       | 46074                          | (G/T)       |
| 35050       | CadSNP10645    | <i>Desi</i>      | Ca_Desig_Scaffold02168       | 46092                          | (A/G)       |
| 35051       | CadSNP10646    | <i>Desi</i>      | Ca_Desig_Scaffold02168       | 46108                          | (C/T)       |
| 35052       | CadSNP10647    | <i>Desi</i>      | Ca_Desig_Scaffold02168       | 46120                          | (A/G)       |
| 35053       | CadSNP10648    | <i>Desi</i>      | Ca_Desig_Scaffold02168       | 47405                          | (G/A)       |
| 35054       | CadSNP10649    | <i>Desi</i>      | Ca_Desig_Scaffold02168       | 47394                          | (T/G)       |
| 35055       | CadSNP10650    | <i>Desi</i>      | Ca_Desig_Scaffold02173       | 23640                          | (T/G)       |
| 35056       | CadSNP10651    | <i>Desi</i>      | Ca_Desig_Scaffold02173       | 23644                          | (G/A)       |
| 35057       | CadSNP10652    | <i>Desi</i>      | Ca_Desig_Scaffold02173       | 23654                          | (C/A)       |
| 35058       | CadSNP10653    | <i>Desi</i>      | Ca_Desig_Scaffold02173       | 23657                          | (C/A)       |
| 35059       | CadSNP10654    | <i>Desi</i>      | Ca_Desig_Scaffold02174       | 15949                          | (T/A)       |
| 35060       | CadSNP10655    | <i>Desi</i>      | Ca_Desig_Scaffold02174       | 16293                          | (C/A)       |
| 35061       | CadSNP10656    | <i>Desi</i>      | Ca_Desig_Scaffold02184       | 3091                           | (T/G)       |
| 35062       | CadSNP10657    | <i>Desi</i>      | Ca_Desig_Scaffold02184       | 3097                           | (T/A)       |
| 35063       | CadSNP10658    | <i>Desi</i>      | Ca_Desig_Scaffold02184       | 5526                           | (T/G)       |
| 35064       | CadSNP10659    | <i>Desi</i>      | Ca_Desig_Scaffold02186       | 21533                          | (G/A)       |
| 35065       | CadSNP10660    | <i>Desi</i>      | Ca_Desig_Scaffold02186       | 21687                          | (A/G)       |
| 35066       | CadSNP10661    | <i>Desi</i>      | Ca_Desig_Scaffold02186       | 21636                          | (A/G)       |
| 35067       | CadSNP10662    | <i>Desi</i>      | Ca_Desig_Scaffold02191       | 30549                          | (T/C)       |
| 35068       | CadSNP10663    | <i>Desi</i>      | Ca_Desig_Scaffold02192       | 3938                           | (G/A)       |
| 35069       | CadSNP10664    | <i>Desi</i>      | Ca_Desig_Scaffold02192       | 3958                           | (A/G)       |
| 35070       | CadSNP10665    | <i>Desi</i>      | Ca_Desig_Scaffold02192       | 3986                           | (C/T)       |
| 35071       | CadSNP10666    | <i>Desi</i>      | Ca_Desig_Scaffold02192       | 4013                           | (G/A)       |
| 35072       | CadSNP10667    | <i>Desi</i>      | Ca_Desig_Scaffold02192       | 4053                           | (A/T)       |
| 35073       | CadSNP10668    | <i>Desi</i>      | Ca_Desig_Scaffold02192       | 4027                           | (T/C)       |

| <b>S.N.</b> | <b>SNP IDs</b> | <b>Cultivars</b> | <b>Chromosomes/scaffolds</b> | <b>Physical positions (bp)</b> | <b>SNPs</b> |
|-------------|----------------|------------------|------------------------------|--------------------------------|-------------|
| 35074       | CadSNP10669    | <i>Desi</i>      | Ca_Desig_Scaffold02192       | 4139                           | (A/G)       |
| 35075       | CadSNP10670    | <i>Desi</i>      | Ca_Desig_Scaffold02192       | 4122                           | (T/C)       |
| 35076       | CadSNP10671    | <i>Desi</i>      | Ca_Desig_Scaffold02192       | 4121                           | (G/A)       |
| 35077       | CadSNP10672    | <i>Desi</i>      | Ca_Desig_Scaffold02192       | 4118                           | (G/C)       |
| 35078       | CadSNP10673    | <i>Desi</i>      | Ca_Desig_Scaffold02192       | 4105                           | (C/A)       |
| 35079       | CadSNP10674    | <i>Desi</i>      | Ca_Desig_Scaffold02192       | 4109                           | (C/G)       |
| 35080       | CadSNP10675    | <i>Desi</i>      | Ca_Desig_Scaffold02192       | 4110                           | (C/T)       |
| 35081       | CadSNP10676    | <i>Desi</i>      | Ca_Desig_Scaffold02192       | 4178                           | (G/T)       |
| 35082       | CadSNP10677    | <i>Desi</i>      | Ca_Desig_Scaffold02192       | 43142                          | (A/T)       |
| 35083       | CadSNP10678    | <i>Desi</i>      | Ca_Desig_Scaffold02192       | 48787                          | (C/T)       |
| 35084       | CadSNP10679    | <i>Desi</i>      | Ca_Desig_Scaffold02201       | 15155                          | (C/A)       |
| 35085       | CadSNP10680    | <i>Desi</i>      | Ca_Desig_Scaffold02201       | 17069                          | (T/C)       |
| 35086       | CadSNP10681    | <i>Desi</i>      | Ca_Desig_Scaffold02203       | 37266                          | (G/A)       |
| 35087       | CadSNP10682    | <i>Desi</i>      | Ca_Desig_Scaffold02204       | 12103                          | (T/C)       |
| 35088       | CadSNP10683    | <i>Desi</i>      | Ca_Desig_Scaffold02209       | 42668                          | (T/G)       |
| 35089       | CadSNP10684    | <i>Desi</i>      | Ca_Desig_Scaffold02212       | 14279                          | (T/G)       |
| 35090       | CadSNP10685    | <i>Desi</i>      | Ca_Desig_Scaffold02218       | 13917                          | (A/G)       |
| 35091       | CadSNP10686    | <i>Desi</i>      | Ca_Desig_Scaffold02219       | 4137                           | (G/A)       |
| 35092       | CadSNP10687    | <i>Desi</i>      | Ca_Desig_Scaffold02225       | 28810                          | (C/G)       |
| 35093       | CadSNP10688    | <i>Desi</i>      | Ca_Desig_Scaffold02225       | 32642                          | (C/T)       |
| 35094       | CadSNP10689    | <i>Desi</i>      | Ca_Desig_Scaffold02227       | 19150                          | (A/G)       |
| 35095       | CadSNP10690    | <i>Desi</i>      | Ca_Desig_Scaffold02227       | 23730                          | (A/G)       |
| 35096       | CadSNP10691    | <i>Desi</i>      | Ca_Desig_Scaffold02227       | 23828                          | (G/T)       |
| 35097       | CadSNP10692    | <i>Desi</i>      | Ca_Desig_Scaffold02236       | 45990                          | (T/A)       |
| 35098       | CadSNP10693    | <i>Desi</i>      | Ca_Desig_Scaffold02236       | 45992                          | (A/C)       |
| 35099       | CadSNP10694    | <i>Desi</i>      | Ca_Desig_Scaffold02238       | 20042                          | (A/G)       |
| 35100       | CadSNP10695    | <i>Desi</i>      | Ca_Desig_Scaffold02238       | 37374                          | (A/G)       |
| 35101       | CadSNP10696    | <i>Desi</i>      | Ca_Desig_Scaffold02240       | 4617                           | (A/C)       |
| 35102       | CadSNP10697    | <i>Desi</i>      | Ca_Desig_Scaffold02247       | 35899                          | (T/C)       |
| 35103       | CadSNP10698    | <i>Desi</i>      | Ca_Desig_Scaffold02248       | 17500                          | (A/G)       |
| 35104       | CadSNP10699    | <i>Desi</i>      | Ca_Desig_Scaffold02251       | 71859                          | (A/C)       |
| 35105       | CadSNP10700    | <i>Desi</i>      | Ca_Desig_Scaffold02251       | 71840                          | (A/C)       |
| 35106       | CadSNP10701    | <i>Desi</i>      | Ca_Desig_Scaffold02251       | 71959                          | (A/C)       |
| 35107       | CadSNP10702    | <i>Desi</i>      | Ca_Desig_Scaffold02255       | 20801                          | (C/A)       |
| 35108       | CadSNP10703    | <i>Desi</i>      | Ca_Desig_Scaffold02255       | 20805                          | (A/T)       |
| 35109       | CadSNP10704    | <i>Desi</i>      | Ca_Desig_Scaffold02255       | 20813                          | (A/T)       |
| 35110       | CadSNP10705    | <i>Desi</i>      | Ca_Desig_Scaffold02255       | 20844                          | (A/G)       |
| 35111       | CadSNP10706    | <i>Desi</i>      | Ca_Desig_Scaffold02255       | 21031                          | (A/G)       |

| <b>S.N.</b> | <b>SNP IDs</b> | <b>Cultivars</b> | <b>Chromosomes/scaffolds</b> | <b>Physical positions (bp)</b> | <b>SNPs</b> |
|-------------|----------------|------------------|------------------------------|--------------------------------|-------------|
| 35112       | CadSNP10707    | <i>Desi</i>      | Ca_Desig_Scaffold02255       | 21012                          | (G/C)       |
| 35113       | CadSNP10708    | <i>Desi</i>      | Ca_Desig_Scaffold02255       | 20987                          | (G/A)       |
| 35114       | CadSNP10709    | <i>Desi</i>      | Ca_Desig_Scaffold02255       | 20971                          | (T/C)       |
| 35115       | CadSNP10710    | <i>Desi</i>      | Ca_Desig_Scaffold02255       | 21433                          | (C/T)       |
| 35116       | CadSNP10711    | <i>Desi</i>      | Ca_Desig_Scaffold02255       | 35797                          | (G/T)       |
| 35117       | CadSNP10712    | <i>Desi</i>      | Ca_Desig_Scaffold02255       | 35841                          | (A/G)       |
| 35118       | CadSNP10713    | <i>Desi</i>      | Ca_Desig_Scaffold02257       | 10465                          | (T/A)       |
| 35119       | CadSNP10714    | <i>Desi</i>      | Ca_Desig_Scaffold02257       | 10565                          | (T/G)       |
| 35120       | CadSNP10715    | <i>Desi</i>      | Ca_Desig_Scaffold02257       | 10604                          | (T/G)       |
| 35121       | CadSNP10716    | <i>Desi</i>      | Ca_Desig_Scaffold02257       | 10671                          | (T/G)       |
| 35122       | CadSNP10717    | <i>Desi</i>      | Ca_Desig_Scaffold02257       | 32638                          | (A/G)       |
| 35123       | CadSNP10718    | <i>Desi</i>      | Ca_Desig_Scaffold02259       | 28398                          | (T/A)       |
| 35124       | CadSNP10719    | <i>Desi</i>      | Ca_Desig_Scaffold02259       | 28425                          | (A/T)       |
| 35125       | CadSNP10720    | <i>Desi</i>      | Ca_Desig_Scaffold02259       | 28457                          | (A/G)       |
| 35126       | CadSNP10721    | <i>Desi</i>      | Ca_Desig_Scaffold02259       | 28552                          | (C/T)       |
| 35127       | CadSNP10722    | <i>Desi</i>      | Ca_Desig_Scaffold02259       | 28518                          | (A/G)       |
| 35128       | CadSNP10723    | <i>Desi</i>      | Ca_Desig_Scaffold02259       | 28495                          | (G/C)       |
| 35129       | CadSNP10724    | <i>Desi</i>      | Ca_Desig_Scaffold02259       | 28483                          | (A/G)       |
| 35130       | CadSNP10725    | <i>Desi</i>      | Ca_Desig_Scaffold02262       | 25393                          | (G/T)       |
| 35131       | CadSNP10726    | <i>Desi</i>      | Ca_Desig_Scaffold02269       | 13443                          | (C/T)       |
| 35132       | CadSNP10727    | <i>Desi</i>      | Ca_Desig_Scaffold02269       | 13588                          | (G/A)       |
| 35133       | CadSNP10728    | <i>Desi</i>      | Ca_Desig_Scaffold02269       | 13653                          | (G/A)       |
| 35134       | CadSNP10729    | <i>Desi</i>      | Ca_Desig_Scaffold02269       | 13621                          | (T/C)       |
| 35135       | CadSNP10730    | <i>Desi</i>      | Ca_Desig_Scaffold02277       | 33852                          | (G/T)       |
| 35136       | CadSNP10731    | <i>Desi</i>      | Ca_Desig_Scaffold02278       | 254365                         | (T/G)       |
| 35137       | CadSNP10732    | <i>Desi</i>      | Ca_Desig_Scaffold02278       | 258172                         | (A/C)       |
| 35138       | CadSNP10733    | <i>Desi</i>      | Ca_Desig_Scaffold02278       | 258265                         | (G/A)       |
| 35139       | CadSNP10734    | <i>Desi</i>      | Ca_Desig_Scaffold02278       | 258241                         | (T/C)       |
| 35140       | CadSNP10735    | <i>Desi</i>      | Ca_Desig_Scaffold02280       | 18857                          | (C/T)       |
| 35141       | CadSNP10736    | <i>Desi</i>      | Ca_Desig_Scaffold02282       | 18636                          | (G/A)       |
| 35142       | CadSNP10737    | <i>Desi</i>      | Ca_Desig_Scaffold02283       | 36234                          | (A/C)       |
| 35143       | CadSNP10738    | <i>Desi</i>      | Ca_Desig_Scaffold02284       | 25942                          | (C/T)       |
| 35144       | CadSNP10739    | <i>Desi</i>      | Ca_Desig_Scaffold02286       | 6442                           | (C/T)       |
| 35145       | CadSNP10740    | <i>Desi</i>      | Ca_Desig_Scaffold02287       | 9880                           | (T/C)       |
| 35146       | CadSNP10741    | <i>Desi</i>      | Ca_Desig_Scaffold02287       | 10094                          | (C/T)       |
| 35147       | CadSNP10742    | <i>Desi</i>      | Ca_Desig_Scaffold02287       | 12339                          | (A/G)       |
| 35148       | CadSNP10743    | <i>Desi</i>      | Ca_Desig_Scaffold02291       | 21473                          | (A/G)       |
| 35149       | CadSNP10744    | <i>Desi</i>      | Ca_Desig_Scaffold02291       | 45877                          | (G/A)       |

| <b>S.N.</b> | <b>SNP IDs</b> | <b>Cultivars</b> | <b>Chromosomes/scaffolds</b> | <b>Physical positions (bp)</b> | <b>SNPs</b> |
|-------------|----------------|------------------|------------------------------|--------------------------------|-------------|
| 35150       | CadSNP10745    | <i>Desi</i>      | Ca_Desig_Scaffold02295       | 29864                          | (C/T)       |
| 35151       | CadSNP10746    | <i>Desi</i>      | Ca_Desig_Scaffold02296       | 81922                          | (C/T)       |
| 35152       | CadSNP10747    | <i>Desi</i>      | Ca_Desig_Scaffold02297       | 25083                          | (G/A)       |
| 35153       | CadSNP10748    | <i>Desi</i>      | Ca_Desig_Scaffold02297       | 25095                          | (A/T)       |
| 35154       | CadSNP10749    | <i>Desi</i>      | Ca_Desig_Scaffold02297       | 25154                          | (C/G)       |
| 35155       | CadSNP10750    | <i>Desi</i>      | Ca_Desig_Scaffold02297       | 25241                          | (A/T)       |
| 35156       | CadSNP10751    | <i>Desi</i>      | Ca_Desig_Scaffold02297       | 25230                          | (G/A)       |
| 35157       | CadSNP10752    | <i>Desi</i>      | Ca_Desig_Scaffold02297       | 30875                          | (G/T)       |
| 35158       | CadSNP10753    | <i>Desi</i>      | Ca_Desig_Scaffold02297       | 30897                          | (C/T)       |
| 35159       | CadSNP10754    | <i>Desi</i>      | Ca_Desig_Scaffold02297       | 30921                          | (T/C)       |
| 35160       | CadSNP10755    | <i>Desi</i>      | Ca_Desig_Scaffold02301       | 12710                          | (A/T)       |
| 35161       | CadSNP10756    | <i>Desi</i>      | Ca_Desig_Scaffold02301       | 12718                          | (G/A)       |
| 35162       | CadSNP10757    | <i>Desi</i>      | Ca_Desig_Scaffold02301       | 12729                          | (G/A)       |
| 35163       | CadSNP10758    | <i>Desi</i>      | Ca_Desig_Scaffold02301       | 12739                          | (G/A)       |
| 35164       | CadSNP10759    | <i>Desi</i>      | Ca_Desig_Scaffold02301       | 12760                          | (C/T)       |
| 35165       | CadSNP10760    | <i>Desi</i>      | Ca_Desig_Scaffold02301       | 19304                          | (G/T)       |
| 35166       | CadSNP10761    | <i>Desi</i>      | Ca_Desig_Scaffold02301       | 91631                          | (G/A)       |
| 35167       | CadSNP10762    | <i>Desi</i>      | Ca_Desig_Scaffold02301       | 417398                         | (T/A)       |
| 35168       | CadSNP10763    | <i>Desi</i>      | Ca_Desig_Scaffold02301       | 417413                         | (T/C)       |
| 35169       | CadSNP10764    | <i>Desi</i>      | Ca_Desig_Scaffold02305       | 22047                          | (A/C)       |
| 35170       | CadSNP10765    | <i>Desi</i>      | Ca_Desig_Scaffold02305       | 22036                          | (G/A)       |
| 35171       | CadSNP10766    | <i>Desi</i>      | Ca_Desig_Scaffold02305       | 22021                          | (T/G)       |
| 35172       | CadSNP10767    | <i>Desi</i>      | Ca_Desig_Scaffold02305       | 29687                          | (T/G)       |
| 35173       | CadSNP10768    | <i>Desi</i>      | Ca_Desig_Scaffold02310       | 17054                          | (G/A)       |
| 35174       | CadSNP10769    | <i>Desi</i>      | Ca_Desig_Scaffold02310       | 21517                          | (A/G)       |
| 35175       | CadSNP10770    | <i>Desi</i>      | Ca_Desig_Scaffold02311       | 31547                          | (C/T)       |
| 35176       | CadSNP10771    | <i>Desi</i>      | Ca_Desig_Scaffold02312       | 3186                           | (G/A)       |
| 35177       | CadSNP10772    | <i>Desi</i>      | Ca_Desig_Scaffold02312       | 3248                           | (A/G)       |
| 35178       | CadSNP10773    | <i>Desi</i>      | Ca_Desig_Scaffold02312       | 3257                           | (T/C)       |
| 35179       | CadSNP10774    | <i>Desi</i>      | Ca_Desig_Scaffold02312       | 40688                          | (G/C)       |
| 35180       | CadSNP10775    | <i>Desi</i>      | Ca_Desig_Scaffold02312       | 40694                          | (T/C)       |
| 35181       | CadSNP10776    | <i>Desi</i>      | Ca_Desig_Scaffold02312       | 40709                          | (C/T)       |
| 35182       | CadSNP10777    | <i>Desi</i>      | Ca_Desig_Scaffold02317       | 32939                          | (G/A)       |
| 35183       | CadSNP10778    | <i>Desi</i>      | Ca_Desig_Scaffold02317       | 54463                          | (A/G)       |
| 35184       | CadSNP10779    | <i>Desi</i>      | Ca_Desig_Scaffold02317       | 80499                          | (A/C)       |
| 35185       | CadSNP10780    | <i>Desi</i>      | Ca_Desig_Scaffold02317       | 103744                         | (T/G)       |
| 35186       | CadSNP10781    | <i>Desi</i>      | Ca_Desig_Scaffold02319       | 37852                          | (G/C)       |
| 35187       | CadSNP10782    | <i>Desi</i>      | Ca_Desig_Scaffold02319       | 37854                          | (A/T)       |



| <b>S.N.</b> | <b>SNP IDs</b> | <b>Cultivars</b> | <b>Chromosomes/scaffolds</b> | <b>Physical positions (bp)</b> | <b>SNPs</b> |
|-------------|----------------|------------------|------------------------------|--------------------------------|-------------|
| 35188       | CadSNP10783    | <i>Desi</i>      | Ca_Desig_Scaffold02319       | 37873                          | (T/A)       |
| 35189       | CadSNP10784    | <i>Desi</i>      | Ca_Desig_Scaffold02319       | 37877                          | (C/A)       |
| 35190       | CadSNP10785    | <i>Desi</i>      | Ca_Desig_Scaffold02319       | 37879                          | (A/C)       |
| 35191       | CadSNP10786    | <i>Desi</i>      | Ca_Desig_Scaffold02319       | 38045                          | (G/A)       |
| 35192       | CadSNP10787    | <i>Desi</i>      | Ca_Desig_Scaffold02319       | 38011                          | (T/C)       |
| 35193       | CadSNP10788    | <i>Desi</i>      | Ca_Desig_Scaffold02319       | 38008                          | (C/A)       |
| 35194       | CadSNP10789    | <i>Desi</i>      | Ca_Desig_Scaffold02329       | 42117                          | (C/T)       |
| 35195       | CadSNP10790    | <i>Desi</i>      | Ca_Desig_Scaffold02329       | 42113                          | (T/G)       |
| 35196       | CadSNP10791    | <i>Desi</i>      | Ca_Desig_Scaffold02329       | 42106                          | (G/A)       |
| 35197       | CadSNP10792    | <i>Desi</i>      | Ca_Desig_Scaffold02329       | 42105                          | (A/C)       |
| 35198       | CadSNP10793    | <i>Desi</i>      | Ca_Desig_Scaffold02330       | 20724                          | (A/T)       |
| 35199       | CadSNP10794    | <i>Desi</i>      | Ca_Desig_Scaffold02330       | 20725                          | (T/C)       |
| 35200       | CadSNP10795    | <i>Desi</i>      | Ca_Desig_Scaffold02330       | 22311                          | (T/G)       |
| 35201       | CadSNP10796    | <i>Desi</i>      | Ca_Desig_Scaffold02331       | 4100                           | (T/C)       |
| 35202       | CadSNP10797    | <i>Desi</i>      | Ca_Desig_Scaffold02331       | 7520                           | (T/G)       |
| 35203       | CadSNP10798    | <i>Desi</i>      | Ca_Desig_Scaffold02331       | 7585                           | (A/G)       |
| 35204       | CadSNP10799    | <i>Desi</i>      | Ca_Desig_Scaffold02331       | 20124                          | (C/T)       |
| 35205       | CadSNP10800    | <i>Desi</i>      | Ca_Desig_Scaffold02331       | 20120                          | (T/C)       |
| 35206       | CadSNP10801    | <i>Desi</i>      | Ca_Desig_Scaffold02331       | 24994                          | (C/G)       |
| 35207       | CadSNP10802    | <i>Desi</i>      | Ca_Desig_Scaffold02331       | 25016                          | (C/A)       |
| 35208       | CadSNP10803    | <i>Desi</i>      | Ca_Desig_Scaffold02331       | 27339                          | (C/G)       |
| 35209       | CadSNP10804    | <i>Desi</i>      | Ca_Desig_Scaffold02331       | 27348                          | (C/T)       |
| 35210       | CadSNP10805    | <i>Desi</i>      | Ca_Desig_Scaffold02331       | 27603                          | (C/G)       |
| 35211       | CadSNP10806    | <i>Desi</i>      | Ca_Desig_Scaffold02331       | 27534                          | (T/C)       |
| 35212       | CadSNP10807    | <i>Desi</i>      | Ca_Desig_Scaffold02332       | 24452                          | (A/G)       |
| 35213       | CadSNP10808    | <i>Desi</i>      | Ca_Desig_Scaffold02332       | 24540                          | (A/T)       |
| 35214       | CadSNP10809    | <i>Desi</i>      | Ca_Desig_Scaffold02335       | 13564                          | (C/T)       |
| 35215       | CadSNP10810    | <i>Desi</i>      | Ca_Desig_Scaffold02335       | 13566                          | (T/G)       |
| 35216       | CadSNP10811    | <i>Desi</i>      | Ca_Desig_Scaffold02335       | 13578                          | (C/A)       |
| 35217       | CadSNP10812    | <i>Desi</i>      | Ca_Desig_Scaffold02335       | 13603                          | (T/C)       |
| 35218       | CadSNP10813    | <i>Desi</i>      | Ca_Desig_Scaffold02335       | 13610                          | (T/C)       |
| 35219       | CadSNP10814    | <i>Desi</i>      | Ca_Desig_Scaffold02335       | 13613                          | (C/T)       |
| 35220       | CadSNP10815    | <i>Desi</i>      | Ca_Desig_Scaffold02335       | 13614                          | (A/G)       |
| 35221       | CadSNP10816    | <i>Desi</i>      | Ca_Desig_Scaffold02335       | 13622                          | (T/A)       |
| 35222       | CadSNP10817    | <i>Desi</i>      | Ca_Desig_Scaffold02337       | 15538                          | (G/A)       |
| 35223       | CadSNP10818    | <i>Desi</i>      | Ca_Desig_Scaffold02337       | 15842                          | (A/C)       |
| 35224       | CadSNP10819    | <i>Desi</i>      | Ca_Desig_Scaffold02337       | 34186                          | (A/C)       |
| 35225       | CadSNP10820    | <i>Desi</i>      | Ca_Desig_Scaffold02342       | 8971                           | (C/A)       |

| <b>S.N.</b> | <b>SNP IDs</b> | <b>Cultivars</b> | <b>Chromosomes/scaffolds</b> | <b>Physical positions (bp)</b> | <b>SNPs</b> |
|-------------|----------------|------------------|------------------------------|--------------------------------|-------------|
| 35226       | CadSNP10821    | <i>Desi</i>      | Ca_Desig_Scaffold02343       | 41701                          | (T/C)       |
| 35227       | CadSNP10822    | <i>Desi</i>      | Ca_Desig_Scaffold02348       | 32152                          | (C/T)       |
| 35228       | CadSNP10823    | <i>Desi</i>      | Ca_Desig_Scaffold02357       | 21699                          | (T/C)       |
| 35229       | CadSNP10824    | <i>Desi</i>      | Ca_Desig_Scaffold02357       | 37353                          | (G/A)       |
| 35230       | CadSNP10825    | <i>Desi</i>      | Ca_Desig_Scaffold02357       | 37372                          | (C/T)       |
| 35231       | CadSNP10826    | <i>Desi</i>      | Ca_Desig_Scaffold02359       | 15205                          | (T/G)       |
| 35232       | CadSNP10827    | <i>Desi</i>      | Ca_Desig_Scaffold02361       | 28258                          | (A/C)       |
| 35233       | CadSNP10828    | <i>Desi</i>      | Ca_Desig_Scaffold02361       | 28229                          | (T/G)       |
| 35234       | CadSNP10829    | <i>Desi</i>      | Ca_Desig_Scaffold02361       | 28218                          | (C/T)       |
| 35235       | CadSNP10830    | <i>Desi</i>      | Ca_Desig_Scaffold02361       | 28214                          | (G/A)       |
| 35236       | CadSNP10831    | <i>Desi</i>      | Ca_Desig_Scaffold02361       | 36279                          | (A/G)       |
| 35237       | CadSNP10832    | <i>Desi</i>      | Ca_Desig_Scaffold02361       | 38030                          | (A/G)       |
| 35238       | CadSNP10833    | <i>Desi</i>      | Ca_Desig_Scaffold02363       | 42428                          | (G/A)       |
| 35239       | CadSNP10834    | <i>Desi</i>      | Ca_Desig_Scaffold02363       | 42413                          | (C/T)       |
| 35240       | CadSNP10835    | <i>Desi</i>      | Ca_Desig_Scaffold02365       | 20044                          | (A/T)       |
| 35241       | CadSNP10836    | <i>Desi</i>      | Ca_Desig_Scaffold02366       | 30000                          | (C/T)       |
| 35242       | CadSNP10837    | <i>Desi</i>      | Ca_Desig_Scaffold02366       | 30016                          | (T/C)       |
| 35243       | CadSNP10838    | <i>Desi</i>      | Ca_Desig_Scaffold02370       | 39096                          | (C/T)       |
| 35244       | CadSNP10839    | <i>Desi</i>      | Ca_Desig_Scaffold02374       | 39975                          | (C/T)       |
| 35245       | CadSNP10840    | <i>Desi</i>      | Ca_Desig_Scaffold02375       | 4097                           | (A/G)       |
| 35246       | CadSNP10841    | <i>Desi</i>      | Ca_Desig_Scaffold02375       | 37777                          | (G/A)       |
| 35247       | CadSNP10842    | <i>Desi</i>      | Ca_Desig_Scaffold02375       | 37771                          | (A/T)       |
| 35248       | CadSNP10843    | <i>Desi</i>      | Ca_Desig_Scaffold02387       | 41284                          | (A/C)       |
| 35249       | CadSNP10844    | <i>Desi</i>      | Ca_Desig_Scaffold02389       | 37900                          | (C/A)       |
| 35250       | CadSNP10845    | <i>Desi</i>      | Ca_Desig_Scaffold02389       | 38041                          | (G/C)       |
| 35251       | CadSNP10846    | <i>Desi</i>      | Ca_Desig_Scaffold02389       | 42559                          | (T/C)       |
| 35252       | CadSNP10847    | <i>Desi</i>      | Ca_Desig_Scaffold02391       | 41529                          | (A/G)       |
| 35253       | CadSNP10848    | <i>Desi</i>      | Ca_Desig_Scaffold02391       | 41572                          | (G/A)       |
| 35254       | CadSNP10849    | <i>Desi</i>      | Ca_Desig_Scaffold02398       | 21640                          | (G/C)       |
| 35255       | CadSNP10850    | <i>Desi</i>      | Ca_Desig_Scaffold02401       | 2221                           | (G/A)       |
| 35256       | CadSNP10851    | <i>Desi</i>      | Ca_Desig_Scaffold02401       | 2244                           | (C/A)       |
| 35257       | CadSNP10852    | <i>Desi</i>      | Ca_Desig_Scaffold02401       | 2251                           | (G/T)       |
| 35258       | CadSNP10853    | <i>Desi</i>      | Ca_Desig_Scaffold02401       | 2341                           | (G/C)       |
| 35259       | CadSNP10854    | <i>Desi</i>      | Ca_Desig_Scaffold02401       | 2297                           | (A/G)       |
| 35260       | CadSNP10855    | <i>Desi</i>      | Ca_Desig_Scaffold02401       | 3613                           | (T/C)       |
| 35261       | CadSNP10856    | <i>Desi</i>      | Ca_Desig_Scaffold02401       | 3673                           | (C/T)       |
| 35262       | CadSNP10857    | <i>Desi</i>      | Ca_Desig_Scaffold02401       | 4817                           | (G/A)       |
| 35263       | CadSNP10858    | <i>Desi</i>      | Ca_Desig_Scaffold02401       | 4825                           | (C/G)       |

| <b>S.N.</b> | <b>SNP IDs</b> | <b>Cultivars</b> | <b>Chromosomes/scaffolds</b> | <b>Physical positions (bp)</b> | <b>SNPs</b> |
|-------------|----------------|------------------|------------------------------|--------------------------------|-------------|
| 35264       | CadSNP10859    | <i>Desi</i>      | Ca_Desig_Scaffold02401       | 4858                           | (G/T)       |
| 35265       | CadSNP10860    | <i>Desi</i>      | Ca_Desig_Scaffold02401       | 4876                           | (G/A)       |
| 35266       | CadSNP10861    | <i>Desi</i>      | Ca_Desig_Scaffold02401       | 5591                           | (T/G)       |
| 35267       | CadSNP10862    | <i>Desi</i>      | Ca_Desig_Scaffold02401       | 5593                           | (A/T)       |
| 35268       | CadSNP10863    | <i>Desi</i>      | Ca_Desig_Scaffold02401       | 5610                           | (A/T)       |
| 35269       | CadSNP10864    | <i>Desi</i>      | Ca_Desig_Scaffold02401       | 5798                           | (T/A)       |
| 35270       | CadSNP10865    | <i>Desi</i>      | Ca_Desig_Scaffold02401       | 5796                           | (G/T)       |
| 35271       | CadSNP10866    | <i>Desi</i>      | Ca_Desig_Scaffold02401       | 12927                          | (A/G)       |
| 35272       | CadSNP10867    | <i>Desi</i>      | Ca_Desig_Scaffold02401       | 12903                          | (C/G)       |
| 35273       | CadSNP10868    | <i>Desi</i>      | Ca_Desig_Scaffold02401       | 12866                          | (G/A)       |
| 35274       | CadSNP10869    | <i>Desi</i>      | Ca_Desig_Scaffold02401       | 14018                          | (G/T)       |
| 35275       | CadSNP10870    | <i>Desi</i>      | Ca_Desig_Scaffold02401       | 39981                          | (A/C)       |
| 35276       | CadSNP10871    | <i>Desi</i>      | Ca_Desig_Scaffold02404       | 15890                          | (A/G)       |
| 35277       | CadSNP10872    | <i>Desi</i>      | Ca_Desig_Scaffold02404       | 19861                          | (A/G)       |
| 35278       | CadSNP10873    | <i>Desi</i>      | Ca_Desig_Scaffold02404       | 36288                          | (C/G)       |
| 35279       | CadSNP10874    | <i>Desi</i>      | Ca_Desig_Scaffold02411       | 21629                          | (G/A)       |
| 35280       | CadSNP10875    | <i>Desi</i>      | Ca_Desig_Scaffold02411       | 21750                          | (T/C)       |
| 35281       | CadSNP10876    | <i>Desi</i>      | Ca_Desig_Scaffold02414       | 4988                           | (C/T)       |
| 35282       | CadSNP10877    | <i>Desi</i>      | Ca_Desig_Scaffold02414       | 5474                           | (T/C)       |
| 35283       | CadSNP10878    | <i>Desi</i>      | Ca_Desig_Scaffold02414       | 5456                           | (C/T)       |
| 35284       | CadSNP10879    | <i>Desi</i>      | Ca_Desig_Scaffold02414       | 5453                           | (T/G)       |
| 35285       | CadSNP10880    | <i>Desi</i>      | Ca_Desig_Scaffold02424       | 31331                          | (T/A)       |
| 35286       | CadSNP10881    | <i>Desi</i>      | Ca_Desig_Scaffold02424       | 61755                          | (G/A)       |
| 35287       | CadSNP10882    | <i>Desi</i>      | Ca_Desig_Scaffold02424       | 61769                          | (G/A)       |
| 35288       | CadSNP10883    | <i>Desi</i>      | Ca_Desig_Scaffold02424       | 61775                          | (T/G)       |
| 35289       | CadSNP10884    | <i>Desi</i>      | Ca_Desig_Scaffold02424       | 61785                          | (T/C)       |
| 35290       | CadSNP10885    | <i>Desi</i>      | Ca_Desig_Scaffold02424       | 61811                          | (G/T)       |
| 35291       | CadSNP10886    | <i>Desi</i>      | Ca_Desig_Scaffold02424       | 61827                          | (G/C)       |
| 35292       | CadSNP10887    | <i>Desi</i>      | Ca_Desig_Scaffold02424       | 61861                          | (G/T)       |
| 35293       | CadSNP10888    | <i>Desi</i>      | Ca_Desig_Scaffold02424       | 62037                          | (T/C)       |
| 35294       | CadSNP10889    | <i>Desi</i>      | Ca_Desig_Scaffold02424       | 62017                          | (C/T)       |
| 35295       | CadSNP10890    | <i>Desi</i>      | Ca_Desig_Scaffold02424       | 62010                          | (T/C)       |
| 35296       | CadSNP10891    | <i>Desi</i>      | Ca_Desig_Scaffold02424       | 61961                          | (G/A)       |
| 35297       | CadSNP10892    | <i>Desi</i>      | Ca_Desig_Scaffold02424       | 75285                          | (C/A)       |
| 35298       | CadSNP10893    | <i>Desi</i>      | Ca_Desig_Scaffold02427       | 33186                          | (T/A)       |
| 35299       | CadSNP10894    | <i>Desi</i>      | Ca_Desig_Scaffold02430       | 4449                           | (C/G)       |
| 35300       | CadSNP10895    | <i>Desi</i>      | Ca_Desig_Scaffold02430       | 4465                           | (C/T)       |
| 35301       | CadSNP10896    | <i>Desi</i>      | Ca_Desig_Scaffold02434       | 28388                          | (C/T)       |

| <b>S.N.</b> | <b>SNP IDs</b> | <b>Cultivars</b> | <b>Chromosomes/scaffolds</b> | <b>Physical positions (bp)</b> | <b>SNPs</b> |
|-------------|----------------|------------------|------------------------------|--------------------------------|-------------|
| 35302       | CadSNP10897    | <i>Desi</i>      | Ca_Desig_Scaffold02434       | 28448                          | (C/T)       |
| 35303       | CadSNP10898    | <i>Desi</i>      | Ca_Desig_Scaffold02434       | 28487                          | (C/A)       |
| 35304       | CadSNP10899    | <i>Desi</i>      | Ca_Desig_Scaffold02434       | 28494                          | (T/G)       |
| 35305       | CadSNP10900    | <i>Desi</i>      | Ca_Desig_Scaffold02437       | 10556                          | (G/A)       |
| 35306       | CadSNP10901    | <i>Desi</i>      | Ca_Desig_Scaffold02437       | 10694                          | (G/T)       |
| 35307       | CadSNP10902    | <i>Desi</i>      | Ca_Desig_Scaffold02437       | 10754                          | (G/A)       |
| 35308       | CadSNP10903    | <i>Desi</i>      | Ca_Desig_Scaffold02437       | 10793                          | (A/G)       |
| 35309       | CadSNP10904    | <i>Desi</i>      | Ca_Desig_Scaffold02437       | 10844                          | (G/A)       |
| 35310       | CadSNP10905    | <i>Desi</i>      | Ca_Desig_Scaffold02437       | 10982                          | (G/A)       |
| 35311       | CadSNP10906    | <i>Desi</i>      | Ca_Desig_Scaffold02437       | 17890                          | (G/A)       |
| 35312       | CadSNP10907    | <i>Desi</i>      | Ca_Desig_Scaffold02437       | 21498                          | (A/G)       |
| 35313       | CadSNP10908    | <i>Desi</i>      | Ca_Desig_Scaffold02437       | 21589                          | (A/G)       |
| 35314       | CadSNP10909    | <i>Desi</i>      | Ca_Desig_Scaffold02437       | 24605                          | (G/T)       |
| 35315       | CadSNP10910    | <i>Desi</i>      | Ca_Desig_Scaffold02445       | 11740                          | (T/C)       |
| 35316       | CadSNP10911    | <i>Desi</i>      | Ca_Desig_Scaffold02445       | 11810                          | (C/T)       |
| 35317       | CadSNP10912    | <i>Desi</i>      | Ca_Desig_Scaffold02445       | 12082                          | (C/T)       |
| 35318       | CadSNP10913    | <i>Desi</i>      | Ca_Desig_Scaffold02445       | 25911                          | (C/A)       |
| 35319       | CadSNP10914    | <i>Desi</i>      | Ca_Desig_Scaffold02445       | 25910                          | (T/A)       |
| 35320       | CadSNP10915    | <i>Desi</i>      | Ca_Desig_Scaffold02445       | 25905                          | (C/A)       |
| 35321       | CadSNP10916    | <i>Desi</i>      | Ca_Desig_Scaffold02445       | 25902                          | (C/T)       |
| 35322       | CadSNP10917    | <i>Desi</i>      | Ca_Desig_Scaffold02445       | 25900                          | (G/T)       |
| 35323       | CadSNP10918    | <i>Desi</i>      | Ca_Desig_Scaffold02445       | 25899                          | (C/T)       |
| 35324       | CadSNP10919    | <i>Desi</i>      | Ca_Desig_Scaffold02445       | 25897                          | (C/T)       |
| 35325       | CadSNP10920    | <i>Desi</i>      | Ca_Desig_Scaffold02446       | 26958                          | (A/C)       |
| 35326       | CadSNP10921    | <i>Desi</i>      | Ca_Desig_Scaffold02447       | 34332                          | (T/G)       |
| 35327       | CadSNP10922    | <i>Desi</i>      | Ca_Desig_Scaffold02458       | 6801                           | (C/A)       |
| 35328       | CadSNP10923    | <i>Desi</i>      | Ca_Desig_Scaffold02465       | 3870                           | (C/A)       |
| 35329       | CadSNP10924    | <i>Desi</i>      | Ca_Desig_Scaffold02465       | 3869                           | (A/G)       |
| 35330       | CadSNP10925    | <i>Desi</i>      | Ca_Desig_Scaffold02465       | 3868                           | (G/A)       |
| 35331       | CadSNP10926    | <i>Desi</i>      | Ca_Desig_Scaffold02465       | 3867                           | (G/A)       |
| 35332       | CadSNP10927    | <i>Desi</i>      | Ca_Desig_Scaffold02465       | 3865                           | (C/G)       |
| 35333       | CadSNP10928    | <i>Desi</i>      | Ca_Desig_Scaffold02465       | 3864                           | (A/C)       |
| 35334       | CadSNP10929    | <i>Desi</i>      | Ca_Desig_Scaffold02466       | 20881                          | (C/G)       |
| 35335       | CadSNP10930    | <i>Desi</i>      | Ca_Desig_Scaffold02470       | 42205                          | (C/A)       |
| 35336       | CadSNP10931    | <i>Desi</i>      | Ca_Desig_Scaffold02470       | 42270                          | (T/A)       |
| 35337       | CadSNP10932    | <i>Desi</i>      | Ca_Desig_Scaffold02470       | 42290                          | (A/C)       |
| 35338       | CadSNP10933    | <i>Desi</i>      | Ca_Desig_Scaffold02474       | 43018                          | (T/C)       |
| 35339       | CadSNP10934    | <i>Desi</i>      | Ca_Desig_Scaffold02474       | 43054                          | (T/C)       |

| <b>S.N.</b> | <b>SNP IDs</b> | <b>Cultivars</b> | <b>Chromosomes/scaffolds</b> | <b>Physical positions (bp)</b> | <b>SNPs</b> |
|-------------|----------------|------------------|------------------------------|--------------------------------|-------------|
| 35340       | CadSNP10935    | <i>Desi</i>      | Ca_Desig_Scaffold02475       | 20624                          | (T/C)       |
| 35341       | CadSNP10936    | <i>Desi</i>      | Ca_Desig_Scaffold02476       | 22506                          | (G/A)       |
| 35342       | CadSNP10937    | <i>Desi</i>      | Ca_Desig_Scaffold02476       | 35029                          | (A/G)       |
| 35343       | CadSNP10938    | <i>Desi</i>      | Ca_Desig_Scaffold02476       | 35006                          | (A/C)       |
| 35344       | CadSNP10939    | <i>Desi</i>      | Ca_Desig_Scaffold02476       | 35010                          | (G/A)       |
| 35345       | CadSNP10940    | <i>Desi</i>      | Ca_Desig_Scaffold02476       | 35011                          | (A/T)       |
| 35346       | CadSNP10941    | <i>Desi</i>      | Ca_Desig_Scaffold02476       | 35018                          | (C/A)       |
| 35347       | CadSNP10942    | <i>Desi</i>      | Ca_Desig_Scaffold02476       | 35027                          | (T/A)       |
| 35348       | CadSNP10943    | <i>Desi</i>      | Ca_Desig_Scaffold02476       | 35028                          | (C/A)       |
| 35349       | CadSNP10944    | <i>Desi</i>      | Ca_Desig_Scaffold02476       | 35030                          | (G/T)       |
| 35350       | CadSNP10945    | <i>Desi</i>      | Ca_Desig_Scaffold02476       | 35031                          | (C/A)       |
| 35351       | CadSNP10946    | <i>Desi</i>      | Ca_Desig_Scaffold02476       | 35039                          | (T/A)       |
| 35352       | CadSNP10947    | <i>Desi</i>      | Ca_Desig_Scaffold02476       | 35049                          | (G/A)       |
| 35353       | CadSNP10948    | <i>Desi</i>      | Ca_Desig_Scaffold02476       | 35124                          | (G/C)       |
| 35354       | CadSNP10949    | <i>Desi</i>      | Ca_Desig_Scaffold02476       | 35127                          | (G/A)       |
| 35355       | CadSNP10950    | <i>Desi</i>      | Ca_Desig_Scaffold02476       | 35188                          | (T/A)       |
| 35356       | CadSNP10951    | <i>Desi</i>      | Ca_Desig_Scaffold02476       | 35187                          | (T/C)       |
| 35357       | CadSNP10952    | <i>Desi</i>      | Ca_Desig_Scaffold02476       | 35163                          | (A/G)       |
| 35358       | CadSNP10953    | <i>Desi</i>      | Ca_Desig_Scaffold02478       | 37185                          | (G/A)       |
| 35359       | CadSNP10954    | <i>Desi</i>      | Ca_Desig_Scaffold02478       | 37295                          | (A/C)       |
| 35360       | CadSNP10955    | <i>Desi</i>      | Ca_Desig_Scaffold02478       | 37275                          | (G/A)       |
| 35361       | CadSNP10956    | <i>Desi</i>      | Ca_Desig_Scaffold02478       | 37259                          | (G/A)       |
| 35362       | CadSNP10957    | <i>Desi</i>      | Ca_Desig_Scaffold02490       | 547                            | (T/A)       |
| 35363       | CadSNP10958    | <i>Desi</i>      | Ca_Desig_Scaffold02490       | 517                            | (T/A)       |
| 35364       | CadSNP10959    | <i>Desi</i>      | Ca_Desig_Scaffold02493       | 37115                          | (T/C)       |
| 35365       | CadSNP10960    | <i>Desi</i>      | Ca_Desig_Scaffold02502       | 4384                           | (A/G)       |
| 35366       | CadSNP10961    | <i>Desi</i>      | Ca_Desig_Scaffold02503       | 9042                           | (T/C)       |
| 35367       | CadSNP10962    | <i>Desi</i>      | Ca_Desig_Scaffold02505       | 19143                          | (A/G)       |
| 35368       | CadSNP10963    | <i>Desi</i>      | Ca_Desig_Scaffold02514       | 1020                           | (T/C)       |
| 35369       | CadSNP10964    | <i>Desi</i>      | Ca_Desig_Scaffold02514       | 1026                           | (T/G)       |
| 35370       | CadSNP10965    | <i>Desi</i>      | Ca_Desig_Scaffold02514       | 6393                           | (T/C)       |
| 35371       | CadSNP10966    | <i>Desi</i>      | Ca_Desig_Scaffold02519       | 35058                          | (A/T)       |
| 35372       | CadSNP10967    | <i>Desi</i>      | Ca_Desig_Scaffold02519       | 34995                          | (T/C)       |
| 35373       | CadSNP10968    | <i>Desi</i>      | Ca_Desig_Scaffold02523       | 3391                           | (G/A)       |
| 35374       | CadSNP10969    | <i>Desi</i>      | Ca_Desig_Scaffold02523       | 39370                          | (G/A)       |
| 35375       | CadSNP10970    | <i>Desi</i>      | Ca_Desig_Scaffold02523       | 39373                          | (T/C)       |
| 35376       | CadSNP10971    | <i>Desi</i>      | Ca_Desig_Scaffold02524       | 35771                          | (A/C)       |
| 35377       | CadSNP10972    | <i>Desi</i>      | Ca_Desig_Scaffold02526       | 35549                          | (G/C)       |

| <b>S.N.</b> | <b>SNP IDs</b> | <b>Cultivars</b> | <b>Chromosomes/scaffolds</b> | <b>Physical positions (bp)</b> | <b>SNPs</b> |
|-------------|----------------|------------------|------------------------------|--------------------------------|-------------|
| 35378       | CadSNP10973    | <i>Desi</i>      | Ca_Desig_Scaffold02531       | 8677                           | (T/G)       |
| 35379       | CadSNP10974    | <i>Desi</i>      | Ca_Desig_Scaffold02535       | 82252                          | (G/A)       |
| 35380       | CadSNP10975    | <i>Desi</i>      | Ca_Desig_Scaffold02535       | 83129                          | (A/G)       |
| 35381       | CadSNP10976    | <i>Desi</i>      | Ca_Desig_Scaffold02537       | 35987                          | (C/T)       |
| 35382       | CadSNP10977    | <i>Desi</i>      | Ca_Desig_Scaffold02537       | 35978                          | (A/C)       |
| 35383       | CadSNP10978    | <i>Desi</i>      | Ca_Desig_Scaffold02548       | 7266                           | (G/A)       |
| 35384       | CadSNP10979    | <i>Desi</i>      | Ca_Desig_Scaffold02548       | 11336                          | (A/C)       |
| 35385       | CadSNP10980    | <i>Desi</i>      | Ca_Desig_Scaffold02548       | 13665                          | (C/T)       |
| 35386       | CadSNP10981    | <i>Desi</i>      | Ca_Desig_Scaffold02562       | 722                            | (T/A)       |
| 35387       | CadSNP10982    | <i>Desi</i>      | Ca_Desig_Scaffold02562       | 22051                          | (A/T)       |
| 35388       | CadSNP10983    | <i>Desi</i>      | Ca_Desig_Scaffold02562       | 22327                          | (C/T)       |
| 35389       | CadSNP10984    | <i>Desi</i>      | Ca_Desig_Scaffold02562       | 26406                          | (A/T)       |
| 35390       | CadSNP10985    | <i>Desi</i>      | Ca_Desig_Scaffold02562       | 42083                          | (C/T)       |
| 35391       | CadSNP10986    | <i>Desi</i>      | Ca_Desig_Scaffold02566       | 17870                          | (T/C)       |
| 35392       | CadSNP10987    | <i>Desi</i>      | Ca_Desig_Scaffold02566       | 23230                          | (G/A)       |
| 35393       | CadSNP10988    | <i>Desi</i>      | Ca_Desig_Scaffold02573       | 21363                          | (G/A)       |
| 35394       | CadSNP10989    | <i>Desi</i>      | Ca_Desig_Scaffold02578       | 20032                          | (G/T)       |
| 35395       | CadSNP10990    | <i>Desi</i>      | Ca_Desig_Scaffold02578       | 20024                          | (C/T)       |
| 35396       | CadSNP10991    | <i>Desi</i>      | Ca_Desig_Scaffold02584       | 818                            | (C/A)       |
| 35397       | CadSNP10992    | <i>Desi</i>      | Ca_Desig_Scaffold02584       | 781                            | (G/A)       |
| 35398       | CadSNP10993    | <i>Desi</i>      | Ca_Desig_Scaffold02584       | 778                            | (A/G)       |
| 35399       | CadSNP10994    | <i>Desi</i>      | Ca_Desig_Scaffold02584       | 875                            | (C/T)       |
| 35400       | CadSNP10995    | <i>Desi</i>      | Ca_Desig_Scaffold02584       | 842                            | (G/T)       |
| 35401       | CadSNP10996    | <i>Desi</i>      | Ca_Desig_Scaffold02584       | 841                            | (C/T)       |
| 35402       | CadSNP10997    | <i>Desi</i>      | Ca_Desig_Scaffold02584       | 9445                           | (G/A)       |
| 35403       | CadSNP10998    | <i>Desi</i>      | Ca_Desig_Scaffold02584       | 11311                          | (A/T)       |
| 35404       | CadSNP10999    | <i>Desi</i>      | Ca_Desig_Scaffold02586       | 8828                           | (A/C)       |
| 35405       | CadSNP11000    | <i>Desi</i>      | Ca_Desig_Scaffold02589       | 20722                          | (C/T)       |
| 35406       | CadSNP11001    | <i>Desi</i>      | Ca_Desig_Scaffold02589       | 61134                          | (A/G)       |
| 35407       | CadSNP11002    | <i>Desi</i>      | Ca_Desig_Scaffold02589       | 61278                          | (T/C)       |
| 35408       | CadSNP11003    | <i>Desi</i>      | Ca_Desig_Scaffold02589       | 61365                          | (T/G)       |
| 35409       | CadSNP11004    | <i>Desi</i>      | Ca_Desig_Scaffold02589       | 61395                          | (G/A)       |
| 35410       | CadSNP11005    | <i>Desi</i>      | Ca_Desig_Scaffold02589       | 63458                          | (A/G)       |
| 35411       | CadSNP11006    | <i>Desi</i>      | Ca_Desig_Scaffold02589       | 105559                         | (T/C)       |
| 35412       | CadSNP11007    | <i>Desi</i>      | Ca_Desig_Scaffold02589       | 114142                         | (T/C)       |
| 35413       | CadSNP11008    | <i>Desi</i>      | Ca_Desig_Scaffold02589       | 114176                         | (C/T)       |
| 35414       | CadSNP11009    | <i>Desi</i>      | Ca_Desig_Scaffold02593       | 4592                           | (G/A)       |
| 35415       | CadSNP11010    | <i>Desi</i>      | Ca_Desig_Scaffold02602       | 3492                           | (G/A)       |

| <b>S.N.</b> | <b>SNP IDs</b> | <b>Cultivars</b> | <b>Chromosomes/scaffolds</b> | <b>Physical positions (bp)</b> | <b>SNPs</b> |
|-------------|----------------|------------------|------------------------------|--------------------------------|-------------|
| 35416       | CadSNP11011    | <i>Desi</i>      | Ca_Desig_Scaffold02602       | 5370                           | (A/G)       |
| 35417       | CadSNP11012    | <i>Desi</i>      | Ca_Desig_Scaffold02602       | 12446                          | (C/T)       |
| 35418       | CadSNP11013    | <i>Desi</i>      | Ca_Desig_Scaffold02602       | 22116                          | (G/A)       |
| 35419       | CadSNP11014    | <i>Desi</i>      | Ca_Desig_Scaffold02602       | 22178                          | (A/C)       |
| 35420       | CadSNP11015    | <i>Desi</i>      | Ca_Desig_Scaffold02602       | 33915                          | (A/G)       |
| 35421       | CadSNP11016    | <i>Desi</i>      | Ca_Desig_Scaffold02603       | 4601                           | (C/T)       |
| 35422       | CadSNP11017    | <i>Desi</i>      | Ca_Desig_Scaffold02603       | 16382                          | (G/A)       |
| 35423       | CadSNP11018    | <i>Desi</i>      | Ca_Desig_Scaffold02603       | 16361                          | (G/T)       |
| 35424       | CadSNP11019    | <i>Desi</i>      | Ca_Desig_Scaffold02603       | 16448                          | (T/C)       |
| 35425       | CadSNP11020    | <i>Desi</i>      | Ca_Desig_Scaffold02616       | 19264                          | (A/C)       |
| 35426       | CadSNP11021    | <i>Desi</i>      | Ca_Desig_Scaffold02619       | 18792                          | (T/A)       |
| 35427       | CadSNP11022    | <i>Desi</i>      | Ca_Desig_Scaffold02619       | 18894                          | (T/A)       |
| 35428       | CadSNP11023    | <i>Desi</i>      | Ca_Desig_Scaffold02619       | 18864                          | (G/T)       |
| 35429       | CadSNP11024    | <i>Desi</i>      | Ca_Desig_Scaffold02619       | 19775                          | (G/A)       |
| 35430       | CadSNP11025    | <i>Desi</i>      | Ca_Desig_Scaffold02619       | 19839                          | (T/G)       |
| 35431       | CadSNP11026    | <i>Desi</i>      | Ca_Desig_Scaffold02619       | 19848                          | (T/G)       |
| 35432       | CadSNP11027    | <i>Desi</i>      | Ca_Desig_Scaffold02620       | 4024                           | (T/A)       |
| 35433       | CadSNP11028    | <i>Desi</i>      | Ca_Desig_Scaffold02620       | 7618                           | (T/C)       |
| 35434       | CadSNP11029    | <i>Desi</i>      | Ca_Desig_Scaffold02623       | 12667                          | (C/G)       |
| 35435       | CadSNP11030    | <i>Desi</i>      | Ca_Desig_Scaffold02625       | 3288                           | (G/A)       |
| 35436       | CadSNP11031    | <i>Desi</i>      | Ca_Desig_Scaffold02637       | 30024                          | (A/C)       |
| 35437       | CadSNP11032    | <i>Desi</i>      | Ca_Desig_Scaffold02637       | 29998                          | (T/G)       |
| 35438       | CadSNP11033    | <i>Desi</i>      | Ca_Desig_Scaffold02637       | 30009                          | (C/T)       |
| 35439       | CadSNP11034    | <i>Desi</i>      | Ca_Desig_Scaffold02642       | 7541                           | (C/T)       |
| 35440       | CadSNP11035    | <i>Desi</i>      | Ca_Desig_Scaffold02642       | 7642                           | (A/G)       |
| 35441       | CadSNP11036    | <i>Desi</i>      | Ca_Desig_Scaffold02642       | 7676                           | (T/C)       |
| 35442       | CadSNP11037    | <i>Desi</i>      | Ca_Desig_Scaffold02642       | 7707                           | (T/G)       |
| 35443       | CadSNP11038    | <i>Desi</i>      | Ca_Desig_Scaffold02642       | 15382                          | (A/G)       |
| 35444       | CadSNP11039    | <i>Desi</i>      | Ca_Desig_Scaffold02642       | 15333                          | (A/C)       |
| 35445       | CadSNP11040    | <i>Desi</i>      | Ca_Desig_Scaffold02645       | 111                            | (G/A)       |
| 35446       | CadSNP11041    | <i>Desi</i>      | Ca_Desig_Scaffold02645       | 89                             | (C/T)       |
| 35447       | CadSNP11042    | <i>Desi</i>      | Ca_Desig_Scaffold02646       | 26626                          | (T/G)       |
| 35448       | CadSNP11043    | <i>Desi</i>      | Ca_Desig_Scaffold02646       | 29288                          | (G/A)       |
| 35449       | CadSNP11044    | <i>Desi</i>      | Ca_Desig_Scaffold02648       | 21680                          | (T/C)       |
| 35450       | CadSNP11045    | <i>Desi</i>      | Ca_Desig_Scaffold02649       | 29566                          | (C/G)       |
| 35451       | CadSNP11046    | <i>Desi</i>      | Ca_Desig_Scaffold02651       | 7334                           | (A/C)       |
| 35452       | CadSNP11047    | <i>Desi</i>      | Ca_Desig_Scaffold02651       | 7335                           | (G/T)       |
| 35453       | CadSNP11048    | <i>Desi</i>      | Ca_Desig_Scaffold02651       | 38796                          | (T/C)       |

| <b>S.N.</b> | <b>SNP IDs</b> | <b>Cultivars</b> | <b>Chromosomes/scaffolds</b> | <b>Physical positions (bp)</b> | <b>SNPs</b> |
|-------------|----------------|------------------|------------------------------|--------------------------------|-------------|
| 35454       | CadSNP11049    | <i>Desi</i>      | Ca_Desig_Scaffold02651       | 39907                          | (G/A)       |
| 35455       | CadSNP11050    | <i>Desi</i>      | Ca_Desig_Scaffold02651       | 40092                          | (A/G)       |
| 35456       | CadSNP11051    | <i>Desi</i>      | Ca_Desig_Scaffold02667       | 17367                          | (A/G)       |
| 35457       | CadSNP11052    | <i>Desi</i>      | Ca_Desig_Scaffold02667       | 17368                          | (G/A)       |
| 35458       | CadSNP11053    | <i>Desi</i>      | Ca_Desig_Scaffold02667       | 17389                          | (T/C)       |
| 35459       | CadSNP11054    | <i>Desi</i>      | Ca_Desig_Scaffold02667       | 17390                          | (G/T)       |
| 35460       | CadSNP11055    | <i>Desi</i>      | Ca_Desig_Scaffold02667       | 17408                          | (A/C)       |
| 35461       | CadSNP11056    | <i>Desi</i>      | Ca_Desig_Scaffold02667       | 17428                          | (A/T)       |
| 35462       | CadSNP11057    | <i>Desi</i>      | Ca_Desig_Scaffold02667       | 17545                          | (C/G)       |
| 35463       | CadSNP11058    | <i>Desi</i>      | Ca_Desig_Scaffold02667       | 17538                          | (A/T)       |
| 35464       | CadSNP11059    | <i>Desi</i>      | Ca_Desig_Scaffold02667       | 17532                          | (A/G)       |
| 35465       | CadSNP11060    | <i>Desi</i>      | Ca_Desig_Scaffold02667       | 17525                          | (A/C)       |
| 35466       | CadSNP11061    | <i>Desi</i>      | Ca_Desig_Scaffold02667       | 17522                          | (A/C)       |
| 35467       | CadSNP11062    | <i>Desi</i>      | Ca_Desig_Scaffold02667       | 17521                          | (C/A)       |
| 35468       | CadSNP11063    | <i>Desi</i>      | Ca_Desig_Scaffold02667       | 17512                          | (G/A)       |
| 35469       | CadSNP11064    | <i>Desi</i>      | Ca_Desig_Scaffold02667       | 17510                          | (T/G)       |
| 35470       | CadSNP11065    | <i>Desi</i>      | Ca_Desig_Scaffold02667       | 17504                          | (T/A)       |
| 35471       | CadSNP11066    | <i>Desi</i>      | Ca_Desig_Scaffold02669       | 16936                          | (T/G)       |
| 35472       | CadSNP11067    | <i>Desi</i>      | Ca_Desig_Scaffold02669       | 16983                          | (G/T)       |
| 35473       | CadSNP11068    | <i>Desi</i>      | Ca_Desig_Scaffold02673       | 2102                           | (C/T)       |
| 35474       | CadSNP11069    | <i>Desi</i>      | Ca_Desig_Scaffold02675       | 31733                          | (A/G)       |
| 35475       | CadSNP11070    | <i>Desi</i>      | Ca_Desig_Scaffold02682       | 28621                          | (C/A)       |
| 35476       | CadSNP11071    | <i>Desi</i>      | Ca_Desig_Scaffold02683       | 3411                           | (G/C)       |
| 35477       | CadSNP11072    | <i>Desi</i>      | Ca_Desig_Scaffold02683       | 3407                           | (A/C)       |
| 35478       | CadSNP11073    | <i>Desi</i>      | Ca_Desig_Scaffold02683       | 3390                           | (A/G)       |
| 35479       | CadSNP11074    | <i>Desi</i>      | Ca_Desig_Scaffold02693       | 12901                          | (A/G)       |
| 35480       | CadSNP11075    | <i>Desi</i>      | Ca_Desig_Scaffold02694       | 33                             | (T/G)       |
| 35481       | CadSNP11076    | <i>Desi</i>      | Ca_Desig_Scaffold02694       | 55                             | (T/C)       |
| 35482       | CadSNP11077    | <i>Desi</i>      | Ca_Desig_Scaffold02694       | 94                             | (G/T)       |
| 35483       | CadSNP11078    | <i>Desi</i>      | Ca_Desig_Scaffold02695       | 16297                          | (G/A)       |
| 35484       | CadSNP11079    | <i>Desi</i>      | Ca_Desig_Scaffold02696       | 35997                          | (T/C)       |
| 35485       | CadSNP11080    | <i>Desi</i>      | Ca_Desig_Scaffold02696       | 36063                          | (T/C)       |
| 35486       | CadSNP11081    | <i>Desi</i>      | Ca_Desig_Scaffold02701       | 6635                           | (C/G)       |
| 35487       | CadSNP11082    | <i>Desi</i>      | Ca_Desig_Scaffold02701       | 6642                           | (A/G)       |
| 35488       | CadSNP11083    | <i>Desi</i>      | Ca_Desig_Scaffold02701       | 34185                          | (C/T)       |
| 35489       | CadSNP11084    | <i>Desi</i>      | Ca_Desig_Scaffold02701       | 34167                          | (G/A)       |
| 35490       | CadSNP11085    | <i>Desi</i>      | Ca_Desig_Scaffold02701       | 34135                          | (T/C)       |
| 35491       | CadSNP11086    | <i>Desi</i>      | Ca_Desig_Scaffold02701       | 34134                          | (G/T)       |



| <b>S.N.</b> | <b>SNP IDs</b> | <b>Cultivars</b> | <b>Chromosomes/scaffolds</b> | <b>Physical positions (bp)</b> | <b>SNPs</b> |
|-------------|----------------|------------------|------------------------------|--------------------------------|-------------|
| 35492       | CadSNP11087    | <i>Desi</i>      | Ca_Desig_Scaffold02701       | 34120                          | (A/T)       |
| 35493       | CadSNP11088    | <i>Desi</i>      | Ca_Desig_Scaffold02701       | 34115                          | (C/T)       |
| 35494       | CadSNP11089    | <i>Desi</i>      | Ca_Desig_Scaffold02701       | 34107                          | (A/T)       |
| 35495       | CadSNP11090    | <i>Desi</i>      | Ca_Desig_Scaffold02709       | 38143                          | (T/G)       |
| 35496       | CadSNP11091    | <i>Desi</i>      | Ca_Desig_Scaffold02709       | 38247                          | (T/C)       |
| 35497       | CadSNP11092    | <i>Desi</i>      | Ca_Desig_Scaffold02713       | 15304                          | (C/T)       |
| 35498       | CadSNP11093    | <i>Desi</i>      | Ca_Desig_Scaffold02713       | 17296                          | (T/C)       |
| 35499       | CadSNP11094    | <i>Desi</i>      | Ca_Desig_Scaffold02714       | 15738                          | (C/A)       |
| 35500       | CadSNP11095    | <i>Desi</i>      | Ca_Desig_Scaffold02714       | 17127                          | (C/T)       |
| 35501       | CadSNP11096    | <i>Desi</i>      | Ca_Desig_Scaffold02717       | 7708                           | (G/A)       |
| 35502       | CadSNP11097    | <i>Desi</i>      | Ca_Desig_Scaffold02717       | 10898                          | (A/T)       |
| 35503       | CadSNP11098    | <i>Desi</i>      | Ca_Desig_Scaffold02717       | 10930                          | (A/C)       |
| 35504       | CadSNP11099    | <i>Desi</i>      | Ca_Desig_Scaffold02717       | 13009                          | (T/C)       |
| 35505       | CadSNP11100    | <i>Desi</i>      | Ca_Desig_Scaffold02717       | 18248                          | (A/G)       |
| 35506       | CadSNP11101    | <i>Desi</i>      | Ca_Desig_Scaffold02717       | 18323                          | (G/C)       |
| 35507       | CadSNP11102    | <i>Desi</i>      | Ca_Desig_Scaffold02717       | 18324                          | (C/T)       |
| 35508       | CadSNP11103    | <i>Desi</i>      | Ca_Desig_Scaffold02717       | 20194                          | (A/T)       |
| 35509       | CadSNP11104    | <i>Desi</i>      | Ca_Desig_Scaffold02717       | 20193                          | (A/T)       |
| 35510       | CadSNP11105    | <i>Desi</i>      | Ca_Desig_Scaffold02717       | 20173                          | (T/C)       |
| 35511       | CadSNP11106    | <i>Desi</i>      | Ca_Desig_Scaffold02717       | 28619                          | (C/T)       |
| 35512       | CadSNP11107    | <i>Desi</i>      | Ca_Desig_Scaffold02717       | 28747                          | (G/A)       |
| 35513       | CadSNP11108    | <i>Desi</i>      | Ca_Desig_Scaffold02724       | 35052                          | (T/C)       |
| 35514       | CadSNP11109    | <i>Desi</i>      | Ca_Desig_Scaffold02724       | 35067                          | (T/G)       |
| 35515       | CadSNP11110    | <i>Desi</i>      | Ca_Desig_Scaffold02724       | 35092                          | (A/C)       |
| 35516       | CadSNP11111    | <i>Desi</i>      | Ca_Desig_Scaffold02724       | 35815                          | (T/G)       |
| 35517       | CadSNP11112    | <i>Desi</i>      | Ca_Desig_Scaffold02724       | 35827                          | (C/G)       |
| 35518       | CadSNP11113    | <i>Desi</i>      | Ca_Desig_Scaffold02724       | 35836                          | (C/G)       |
| 35519       | CadSNP11114    | <i>Desi</i>      | Ca_Desig_Scaffold02732       | 31787                          | (A/C)       |
| 35520       | CadSNP11115    | <i>Desi</i>      | Ca_Desig_Scaffold02737       | 15356                          | (T/A)       |
| 35521       | CadSNP11116    | <i>Desi</i>      | Ca_Desig_Scaffold02737       | 15366                          | (G/A)       |
| 35522       | CadSNP11117    | <i>Desi</i>      | Ca_Desig_Scaffold02737       | 35931                          | (G/A)       |
| 35523       | CadSNP11118    | <i>Desi</i>      | Ca_Desig_Scaffold02737       | 35962                          | (A/C)       |
| 35524       | CadSNP11119    | <i>Desi</i>      | Ca_Desig_Scaffold02748       | 405                            | (C/T)       |
| 35525       | CadSNP11120    | <i>Desi</i>      | Ca_Desig_Scaffold02748       | 18443                          | (C/A)       |
| 35526       | CadSNP11121    | <i>Desi</i>      | Ca_Desig_Scaffold02748       | 18484                          | (C/A)       |
| 35527       | CadSNP11122    | <i>Desi</i>      | Ca_Desig_Scaffold02748       | 37444                          | (T/C)       |
| 35528       | CadSNP11123    | <i>Desi</i>      | Ca_Desig_Scaffold02748       | 37396                          | (C/G)       |
| 35529       | CadSNP11124    | <i>Desi</i>      | Ca_Desig_Scaffold02749       | 30710                          | (C/G)       |

| <b>S.N.</b> | <b>SNP IDs</b> | <b>Cultivars</b> | <b>Chromosomes/scaffolds</b> | <b>Physical positions (bp)</b> | <b>SNPs</b> |
|-------------|----------------|------------------|------------------------------|--------------------------------|-------------|
| 35530       | CadSNP11125    | <i>Desi</i>      | Ca_Desig_Scaffold02749       | 30937                          | (G/A)       |
| 35531       | CadSNP11126    | <i>Desi</i>      | Ca_Desig_Scaffold02749       | 34080                          | (C/T)       |
| 35532       | CadSNP11127    | <i>Desi</i>      | Ca_Desig_Scaffold02749       | 34073                          | (T/C)       |
| 35533       | CadSNP11128    | <i>Desi</i>      | Ca_Desig_Scaffold02753       | 67575                          | (C/T)       |
| 35534       | CadSNP11129    | <i>Desi</i>      | Ca_Desig_Scaffold02754       | 32682                          | (T/G)       |
| 35535       | CadSNP11130    | <i>Desi</i>      | Ca_Desig_Scaffold02759       | 10674                          | (T/C)       |
| 35536       | CadSNP11131    | <i>Desi</i>      | Ca_Desig_Scaffold02761       | 38110                          | (T/A)       |
| 35537       | CadSNP11132    | <i>Desi</i>      | Ca_Desig_Scaffold02763       | 24493                          | (A/G)       |
| 35538       | CadSNP11133    | <i>Desi</i>      | Ca_Desig_Scaffold02763       | 24519                          | (A/T)       |
| 35539       | CadSNP11134    | <i>Desi</i>      | Ca_Desig_Scaffold02763       | 24521                          | (C/A)       |
| 35540       | CadSNP11135    | <i>Desi</i>      | Ca_Desig_Scaffold02763       | 24522                          | (A/T)       |
| 35541       | CadSNP11136    | <i>Desi</i>      | Ca_Desig_Scaffold02776       | 17103                          | (G/T)       |
| 35542       | CadSNP11137    | <i>Desi</i>      | Ca_Desig_Scaffold02776       | 17065                          | (T/C)       |
| 35543       | CadSNP11138    | <i>Desi</i>      | Ca_Desig_Scaffold02776       | 17063                          | (A/G)       |
| 35544       | CadSNP11139    | <i>Desi</i>      | Ca_Desig_Scaffold02777       | 32996                          | (C/T)       |
| 35545       | CadSNP11140    | <i>Desi</i>      | Ca_Desig_Scaffold02788       | 154033                         | (G/T)       |
| 35546       | CadSNP11141    | <i>Desi</i>      | Ca_Desig_Scaffold02797       | 8313                           | (A/T)       |
| 35547       | CadSNP11142    | <i>Desi</i>      | Ca_Desig_Scaffold02797       | 8314                           | (T/A)       |
| 35548       | CadSNP11143    | <i>Desi</i>      | Ca_Desig_Scaffold02797       | 8319                           | (G/A)       |
| 35549       | CadSNP11144    | <i>Desi</i>      | Ca_Desig_Scaffold02797       | 8328                           | (T/C)       |
| 35550       | CadSNP11145    | <i>Desi</i>      | Ca_Desig_Scaffold02797       | 8333                           | (C/T)       |
| 35551       | CadSNP11146    | <i>Desi</i>      | Ca_Desig_Scaffold02797       | 32796                          | (G/A)       |
| 35552       | CadSNP11147    | <i>Desi</i>      | Ca_Desig_Scaffold02801       | 33840                          | (T/C)       |
| 35553       | CadSNP11148    | <i>Desi</i>      | Ca_Desig_Scaffold02802       | 19776                          | (A/G)       |
| 35554       | CadSNP11149    | <i>Desi</i>      | Ca_Desig_Scaffold02821       | 37872                          | (G/A)       |
| 35555       | CadSNP11150    | <i>Desi</i>      | Ca_Desig_Scaffold02835       | 42869                          | (G/T)       |
| 35556       | CadSNP11151    | <i>Desi</i>      | Ca_Desig_Scaffold02835       | 43171                          | (C/T)       |
| 35557       | CadSNP11152    | <i>Desi</i>      | Ca_Desig_Scaffold02835       | 43238                          | (C/A)       |
| 35558       | CadSNP11153    | <i>Desi</i>      | Ca_Desig_Scaffold02835       | 129036                         | (G/T)       |
| 35559       | CadSNP11154    | <i>Desi</i>      | Ca_Desig_Scaffold02835       | 131194                         | (G/A)       |
| 35560       | CadSNP11155    | <i>Desi</i>      | Ca_Desig_Scaffold02835       | 134712                         | (A/T)       |
| 35561       | CadSNP11156    | <i>Desi</i>      | Ca_Desig_Scaffold02835       | 134727                         | (G/T)       |
| 35562       | CadSNP11157    | <i>Desi</i>      | Ca_Desig_Scaffold02835       | 207456                         | (T/A)       |
| 35563       | CadSNP11158    | <i>Desi</i>      | Ca_Desig_Scaffold02835       | 207451                         | (T/A)       |
| 35564       | CadSNP11159    | <i>Desi</i>      | Ca_Desig_Scaffold02835       | 207447                         | (G/A)       |
| 35565       | CadSNP11160    | <i>Desi</i>      | Ca_Desig_Scaffold02840       | 34443                          | (A/C)       |
| 35566       | CadSNP11161    | <i>Desi</i>      | Ca_Desig_Scaffold02840       | 34404                          | (C/A)       |
| 35567       | CadSNP11162    | <i>Desi</i>      | Ca_Desig_Scaffold02840       | 37152                          | (C/A)       |

| <b>S.N.</b> | <b>SNP IDs</b> | <b>Cultivars</b> | <b>Chromosomes/scaffolds</b> | <b>Physical positions (bp)</b> | <b>SNPs</b> |
|-------------|----------------|------------------|------------------------------|--------------------------------|-------------|
| 35568       | CadSNP11163    | <i>Desi</i>      | Ca_Desig_Scaffold02840       | 37161                          | (A/C)       |
| 35569       | CadSNP11164    | <i>Desi</i>      | Ca_Desig_Scaffold02840       | 37217                          | (A/T)       |
| 35570       | CadSNP11165    | <i>Desi</i>      | Ca_Desig_Scaffold02845       | 21044                          | (G/T)       |
| 35571       | CadSNP11166    | <i>Desi</i>      | Ca_Desig_Scaffold02848       | 36780                          | (A/G)       |
| 35572       | CadSNP11167    | <i>Desi</i>      | Ca_Desig_Scaffold02848       | 36798                          | (C/T)       |
| 35573       | CadSNP11168    | <i>Desi</i>      | Ca_Desig_Scaffold02848       | 36803                          | (G/A)       |
| 35574       | CadSNP11169    | <i>Desi</i>      | Ca_Desig_Scaffold02848       | 36825                          | (T/G)       |
| 35575       | CadSNP11170    | <i>Desi</i>      | Ca_Desig_Scaffold02850       | 5372                           | (C/T)       |
| 35576       | CadSNP11171    | <i>Desi</i>      | Ca_Desig_Scaffold02850       | 5878                           | (G/A)       |
| 35577       | CadSNP11172    | <i>Desi</i>      | Ca_Desig_Scaffold02850       | 6595                           | (C/T)       |
| 35578       | CadSNP11173    | <i>Desi</i>      | Ca_Desig_Scaffold02850       | 6581                           | (C/A)       |
| 35579       | CadSNP11174    | <i>Desi</i>      | Ca_Desig_Scaffold02867       | 3473                           | (A/G)       |
| 35580       | CadSNP11175    | <i>Desi</i>      | Ca_Desig_Scaffold02872       | 23239                          | (C/T)       |
| 35581       | CadSNP11176    | <i>Desi</i>      | Ca_Desig_Scaffold02872       | 23254                          | (G/T)       |
| 35582       | CadSNP11177    | <i>Desi</i>      | Ca_Desig_Scaffold02872       | 24271                          | (C/T)       |
| 35583       | CadSNP11178    | <i>Desi</i>      | Ca_Desig_Scaffold02872       | 24325                          | (G/A)       |
| 35584       | CadSNP11179    | <i>Desi</i>      | Ca_Desig_Scaffold02872       | 24613                          | (G/A)       |
| 35585       | CadSNP11180    | <i>Desi</i>      | Ca_Desig_Scaffold02887       | 11876                          | (A/G)       |
| 35586       | CadSNP11181    | <i>Desi</i>      | Ca_Desig_Scaffold02891       | 13596                          | (G/T)       |
| 35587       | CadSNP11182    | <i>Desi</i>      | Ca_Desig_Scaffold02898       | 15410                          | (A/G)       |
| 35588       | CadSNP11183    | <i>Desi</i>      | Ca_Desig_Scaffold02908       | 24165                          | (T/C)       |
| 35589       | CadSNP11184    | <i>Desi</i>      | Ca_Desig_Scaffold02912       | 12249                          | (T/A)       |
| 35590       | CadSNP11185    | <i>Desi</i>      | Ca_Desig_Scaffold02918       | 4566                           | (A/G)       |
| 35591       | CadSNP11186    | <i>Desi</i>      | Ca_Desig_Scaffold02918       | 10517                          | (G/C)       |
| 35592       | CadSNP11187    | <i>Desi</i>      | Ca_Desig_Scaffold02920       | 26818                          | (A/G)       |
| 35593       | CadSNP11188    | <i>Desi</i>      | Ca_Desig_Scaffold02926       | 18653                          | (A/G)       |
| 35594       | CadSNP11189    | <i>Desi</i>      | Ca_Desig_Scaffold02928       | 4648                           | (A/G)       |
| 35595       | CadSNP11190    | <i>Desi</i>      | Ca_Desig_Scaffold02928       | 4787                           | (C/T)       |
| 35596       | CadSNP11191    | <i>Desi</i>      | Ca_Desig_Scaffold02931       | 3424                           | (T/C)       |
| 35597       | CadSNP11192    | <i>Desi</i>      | Ca_Desig_Scaffold02932       | 2080                           | (A/G)       |
| 35598       | CadSNP11193    | <i>Desi</i>      | Ca_Desig_Scaffold02932       | 4600                           | (A/C)       |
| 35599       | CadSNP11194    | <i>Desi</i>      | Ca_Desig_Scaffold02945       | 1864                           | (G/T)       |
| 35600       | CadSNP11195    | <i>Desi</i>      | Ca_Desig_Scaffold02945       | 1881                           | (C/T)       |
| 35601       | CadSNP11196    | <i>Desi</i>      | Ca_Desig_Scaffold02945       | 23838                          | (C/T)       |
| 35602       | CadSNP11197    | <i>Desi</i>      | Ca_Desig_Scaffold02949       | 4016                           | (T/G)       |
| 35603       | CadSNP11198    | <i>Desi</i>      | Ca_Desig_Scaffold02949       | 4494                           | (G/T)       |
| 35604       | CadSNP11199    | <i>Desi</i>      | Ca_Desig_Scaffold02949       | 6575                           | (T/C)       |
| 35605       | CadSNP11200    | <i>Desi</i>      | Ca_Desig_Scaffold02949       | 6573                           | (C/A)       |

| <b>S.N.</b> | <b>SNP IDs</b> | <b>Cultivars</b> | <b>Chromosomes/scaffolds</b> | <b>Physical positions (bp)</b> | <b>SNPs</b> |
|-------------|----------------|------------------|------------------------------|--------------------------------|-------------|
| 35606       | CadSNP11201    | <i>Desi</i>      | Ca_Desig_Scaffold02949       | 6565                           | (G/A)       |
| 35607       | CadSNP11202    | <i>Desi</i>      | Ca_Desig_Scaffold02949       | 6560                           | (G/A)       |
| 35608       | CadSNP11203    | <i>Desi</i>      | Ca_Desig_Scaffold02949       | 6553                           | (A/T)       |
| 35609       | CadSNP11204    | <i>Desi</i>      | Ca_Desig_Scaffold02949       | 6542                           | (A/G)       |
| 35610       | CadSNP11205    | <i>Desi</i>      | Ca_Desig_Scaffold02949       | 6537                           | (T/G)       |
| 35611       | CadSNP11206    | <i>Desi</i>      | Ca_Desig_Scaffold02949       | 6530                           | (T/G)       |
| 35612       | CadSNP11207    | <i>Desi</i>      | Ca_Desig_Scaffold02949       | 6502                           | (A/T)       |
| 35613       | CadSNP11208    | <i>Desi</i>      | Ca_Desig_Scaffold02949       | 6497                           | (A/G)       |
| 35614       | CadSNP11209    | <i>Desi</i>      | Ca_Desig_Scaffold02952       | 32332                          | (G/A)       |
| 35615       | CadSNP11210    | <i>Desi</i>      | Ca_Desig_Scaffold02952       | 32406                          | (C/A)       |
| 35616       | CadSNP11211    | <i>Desi</i>      | Ca_Desig_Scaffold02955       | 19673                          | (G/A)       |
| 35617       | CadSNP11212    | <i>Desi</i>      | Ca_Desig_Scaffold02955       | 19687                          | (C/T)       |
| 35618       | CadSNP11213    | <i>Desi</i>      | Ca_Desig_Scaffold02955       | 19700                          | (A/G)       |
| 35619       | CadSNP11214    | <i>Desi</i>      | Ca_Desig_Scaffold02955       | 19714                          | (G/A)       |
| 35620       | CadSNP11215    | <i>Desi</i>      | Ca_Desig_Scaffold02955       | 19716                          | (A/G)       |
| 35621       | CadSNP11216    | <i>Desi</i>      | Ca_Desig_Scaffold02955       | 19720                          | (C/T)       |
| 35622       | CadSNP11217    | <i>Desi</i>      | Ca_Desig_Scaffold02955       | 19730                          | (T/C)       |
| 35623       | CadSNP11218    | <i>Desi</i>      | Ca_Desig_Scaffold02958       | 17083                          | (G/C)       |
| 35624       | CadSNP11219    | <i>Desi</i>      | Ca_Desig_Scaffold02958       | 17070                          | (G/A)       |
| 35625       | CadSNP11220    | <i>Desi</i>      | Ca_Desig_Scaffold02958       | 17014                          | (G/T)       |
| 35626       | CadSNP11221    | <i>Desi</i>      | Ca_Desig_Scaffold02958       | 17110                          | (C/A)       |
| 35627       | CadSNP11222    | <i>Desi</i>      | Ca_Desig_Scaffold02958       | 17104                          | (G/A)       |
| 35628       | CadSNP11223    | <i>Desi</i>      | Ca_Desig_Scaffold02958       | 17615                          | (G/A)       |
| 35629       | CadSNP11224    | <i>Desi</i>      | Ca_Desig_Scaffold02958       | 17719                          | (T/C)       |
| 35630       | CadSNP11225    | <i>Desi</i>      | Ca_Desig_Scaffold02958       | 39356                          | (A/G)       |
| 35631       | CadSNP11226    | <i>Desi</i>      | Ca_Desig_Scaffold02958       | 135181                         | (C/T)       |
| 35632       | CadSNP11227    | <i>Desi</i>      | Ca_Desig_Scaffold02972       | 22809                          | (C/T)       |
| 35633       | CadSNP11228    | <i>Desi</i>      | Ca_Desig_Scaffold02972       | 22812                          | (T/G)       |
| 35634       | CadSNP11229    | <i>Desi</i>      | Ca_Desig_Scaffold02972       | 22777                          | (T/A)       |
| 35635       | CadSNP11230    | <i>Desi</i>      | Ca_Desig_Scaffold02972       | 22753                          | (A/G)       |
| 35636       | CadSNP11231    | <i>Desi</i>      | Ca_Desig_Scaffold02972       | 23940                          | (T/C)       |
| 35637       | CadSNP11232    | <i>Desi</i>      | Ca_Desig_Scaffold02972       | 23943                          | (G/A)       |
| 35638       | CadSNP11233    | <i>Desi</i>      | Ca_Desig_Scaffold02972       | 23950                          | (C/A)       |
| 35639       | CadSNP11234    | <i>Desi</i>      | Ca_Desig_Scaffold02972       | 23951                          | (G/A)       |
| 35640       | CadSNP11235    | <i>Desi</i>      | Ca_Desig_Scaffold02972       | 23952                          | (G/T)       |
| 35641       | CadSNP11236    | <i>Desi</i>      | Ca_Desig_Scaffold02972       | 23956                          | (C/T)       |
| 35642       | CadSNP11237    | <i>Desi</i>      | Ca_Desig_Scaffold02972       | 23958                          | (T/C)       |
| 35643       | CadSNP11238    | <i>Desi</i>      | Ca_Desig_Scaffold02972       | 23961                          | (C/T)       |

| <b>S.N.</b> | <b>SNP IDs</b> | <b>Cultivars</b> | <b>Chromosomes/scaffolds</b> | <b>Physical positions (bp)</b> | <b>SNPs</b> |
|-------------|----------------|------------------|------------------------------|--------------------------------|-------------|
| 35644       | CadSNP11239    | <i>Desi</i>      | Ca_Desig_Scaffold02972       | 24056                          | (A/G)       |
| 35645       | CadSNP11240    | <i>Desi</i>      | Ca_Desig_Scaffold02972       | 24031                          | (C/T)       |
| 35646       | CadSNP11241    | <i>Desi</i>      | Ca_Desig_Scaffold02972       | 26328                          | (C/G)       |
| 35647       | CadSNP11242    | <i>Desi</i>      | Ca_Desig_Scaffold02972       | 26342                          | (T/C)       |
| 35648       | CadSNP11243    | <i>Desi</i>      | Ca_Desig_Scaffold02972       | 26380                          | (T/C)       |
| 35649       | CadSNP11244    | <i>Desi</i>      | Ca_Desig_Scaffold02972       | 26437                          | (C/G)       |
| 35650       | CadSNP11245    | <i>Desi</i>      | Ca_Desig_Scaffold02972       | 26434                          | (G/T)       |
| 35651       | CadSNP11246    | <i>Desi</i>      | Ca_Desig_Scaffold02972       | 26421                          | (T/A)       |
| 35652       | CadSNP11247    | <i>Desi</i>      | Ca_Desig_Scaffold02972       | 26419                          | (C/A)       |
| 35653       | CadSNP11248    | <i>Desi</i>      | Ca_Desig_Scaffold02972       | 26418                          | (A/C)       |
| 35654       | CadSNP11249    | <i>Desi</i>      | Ca_Desig_Scaffold02972       | 26411                          | (T/G)       |
| 35655       | CadSNP11250    | <i>Desi</i>      | Ca_Desig_Scaffold02972       | 26408                          | (G/A)       |
| 35656       | CadSNP11251    | <i>Desi</i>      | Ca_Desig_Scaffold02972       | 26397                          | (A/C)       |
| 35657       | CadSNP11252    | <i>Desi</i>      | Ca_Desig_Scaffold02972       | 26368                          | (A/G)       |
| 35658       | CadSNP11253    | <i>Desi</i>      | Ca_Desig_Scaffold02972       | 29956                          | (C/T)       |
| 35659       | CadSNP11254    | <i>Desi</i>      | Ca_Desig_Scaffold02972       | 30049                          | (T/C)       |
| 35660       | CadSNP11255    | <i>Desi</i>      | Ca_Desig_Scaffold02972       | 30010                          | (A/T)       |
| 35661       | CadSNP11256    | <i>Desi</i>      | Ca_Desig_Scaffold02972       | 29992                          | (T/C)       |
| 35662       | CadSNP11257    | <i>Desi</i>      | Ca_Desig_Scaffold02974       | 36043                          | (A/T)       |
| 35663       | CadSNP11258    | <i>Desi</i>      | Ca_Desig_Scaffold02974       | 36114                          | (A/C)       |
| 35664       | CadSNP11259    | <i>Desi</i>      | Ca_Desig_Scaffold02983       | 12630                          | (T/A)       |
| 35665       | CadSNP11260    | <i>Desi</i>      | Ca_Desig_Scaffold02983       | 12629                          | (C/G)       |
| 35666       | CadSNP11261    | <i>Desi</i>      | Ca_Desig_Scaffold02983       | 12599                          | (A/G)       |
| 35667       | CadSNP11262    | <i>Desi</i>      | Ca_Desig_Scaffold02984       | 8457                           | (T/G)       |
| 35668       | CadSNP11263    | <i>Desi</i>      | Ca_Desig_Scaffold02984       | 8443                           | (A/T)       |
| 35669       | CadSNP11264    | <i>Desi</i>      | Ca_Desig_Scaffold02984       | 31869                          | (G/A)       |
| 35670       | CadSNP11265    | <i>Desi</i>      | Ca_Desig_Scaffold02999       | 24593                          | (G/T)       |
| 35671       | CadSNP11266    | <i>Desi</i>      | Ca_Desig_Scaffold02999       | 24646                          | (A/G)       |
| 35672       | CadSNP11267    | <i>Desi</i>      | Ca_Desig_Scaffold03000       | 2646                           | (G/T)       |
| 35673       | CadSNP11268    | <i>Desi</i>      | Ca_Desig_Scaffold03002       | 34075                          | (T/C)       |
| 35674       | CadSNP11269    | <i>Desi</i>      | Ca_Desig_Scaffold03002       | 34058                          | (T/G)       |
| 35675       | CadSNP11270    | <i>Desi</i>      | Ca_Desig_Scaffold03004       | 18460                          | (G/A)       |
| 35676       | CadSNP11271    | <i>Desi</i>      | Ca_Desig_Scaffold03004       | 18478                          | (C/T)       |
| 35677       | CadSNP11272    | <i>Desi</i>      | Ca_Desig_Scaffold03004       | 24670                          | (A/C)       |
| 35678       | CadSNP11273    | <i>Desi</i>      | Ca_Desig_Scaffold03004       | 24760                          | (T/C)       |
| 35679       | CadSNP11274    | <i>Desi</i>      | Ca_Desig_Scaffold03006       | 28525                          | (C/A)       |
| 35680       | CadSNP11275    | <i>Desi</i>      | Ca_Desig_Scaffold03006       | 28571                          | (T/A)       |
| 35681       | CadSNP11276    | <i>Desi</i>      | Ca_Desig_Scaffold03006       | 28568                          | (C/T)       |

| <b>S.N.</b> | <b>SNP IDs</b> | <b>Cultivars</b> | <b>Chromosomes/scaffolds</b> | <b>Physical positions (bp)</b> | <b>SNPs</b> |
|-------------|----------------|------------------|------------------------------|--------------------------------|-------------|
| 35682       | CadSNP11277    | <i>Desi</i>      | Ca_Desig_Scaffold03006       | 28556                          | (T/G)       |
| 35683       | CadSNP11278    | <i>Desi</i>      | Ca_Desig_Scaffold03006       | 29613                          | (C/T)       |
| 35684       | CadSNP11279    | <i>Desi</i>      | Ca_Desig_Scaffold03006       | 29597                          | (A/C)       |
| 35685       | CadSNP11280    | <i>Desi</i>      | Ca_Desig_Scaffold03006       | 29845                          | (T/C)       |
| 35686       | CadSNP11281    | <i>Desi</i>      | Ca_Desig_Scaffold03006       | 29840                          | (A/C)       |
| 35687       | CadSNP11282    | <i>Desi</i>      | Ca_Desig_Scaffold03010       | 30550                          | (C/A)       |
| 35688       | CadSNP11283    | <i>Desi</i>      | Ca_Desig_Scaffold03010       | 30638                          | (G/A)       |
| 35689       | CadSNP11284    | <i>Desi</i>      | Ca_Desig_Scaffold03010       | 34034                          | (T/C)       |
| 35690       | CadSNP11285    | <i>Desi</i>      | Ca_Desig_Scaffold03010       | 34274                          | (C/T)       |
| 35691       | CadSNP11286    | <i>Desi</i>      | Ca_Desig_Scaffold03017       | 7879                           | (A/G)       |
| 35692       | CadSNP11287    | <i>Desi</i>      | Ca_Desig_Scaffold03023       | 28335                          | (A/G)       |
| 35693       | CadSNP11288    | <i>Desi</i>      | Ca_Desig_Scaffold03023       | 28356                          | (G/A)       |
| 35694       | CadSNP11289    | <i>Desi</i>      | Ca_Desig_Scaffold03023       | 28383                          | (T/C)       |
| 35695       | CadSNP11290    | <i>Desi</i>      | Ca_Desig_Scaffold03023       | 28391                          | (G/T)       |
| 35696       | CadSNP11291    | <i>Desi</i>      | Ca_Desig_Scaffold03030       | 13255                          | (C/T)       |
| 35697       | CadSNP11292    | <i>Desi</i>      | Ca_Desig_Scaffold03031       | 27687                          | (T/A)       |
| 35698       | CadSNP11293    | <i>Desi</i>      | Ca_Desig_Scaffold03031       | 29808                          | (T/C)       |
| 35699       | CadSNP11294    | <i>Desi</i>      | Ca_Desig_Scaffold03035       | 17713                          | (G/A)       |
| 35700       | CadSNP11295    | <i>Desi</i>      | Ca_Desig_Scaffold03035       | 17735                          | (C/T)       |
| 35701       | CadSNP11296    | <i>Desi</i>      | Ca_Desig_Scaffold03035       | 17801                          | (C/T)       |
| 35702       | CadSNP11297    | <i>Desi</i>      | Ca_Desig_Scaffold03035       | 17843                          | (C/T)       |
| 35703       | CadSNP11298    | <i>Desi</i>      | Ca_Desig_Scaffold03035       | 17773                          | (A/G)       |
| 35704       | CadSNP11299    | <i>Desi</i>      | Ca_Desig_Scaffold03036       | 1066                           | (G/A)       |
| 35705       | CadSNP11300    | <i>Desi</i>      | Ca_Desig_Scaffold03036       | 1095                           | (T/A)       |
| 35706       | CadSNP11301    | <i>Desi</i>      | Ca_Desig_Scaffold03036       | 5255                           | (A/T)       |
| 35707       | CadSNP11302    | <i>Desi</i>      | Ca_Desig_Scaffold03038       | 31625                          | (G/C)       |
| 35708       | CadSNP11303    | <i>Desi</i>      | Ca_Desig_Scaffold03038       | 31628                          | (G/A)       |
| 35709       | CadSNP11304    | <i>Desi</i>      | Ca_Desig_Scaffold03038       | 31646                          | (G/A)       |
| 35710       | CadSNP11305    | <i>Desi</i>      | Ca_Desig_Scaffold03052       | 28024                          | (G/A)       |
| 35711       | CadSNP11306    | <i>Desi</i>      | Ca_Desig_Scaffold03053       | 29468                          | (G/T)       |
| 35712       | CadSNP11307    | <i>Desi</i>      | Ca_Desig_Scaffold03054       | 10412                          | (A/G)       |
| 35713       | CadSNP11308    | <i>Desi</i>      | Ca_Desig_Scaffold03054       | 10388                          | (C/A)       |
| 35714       | CadSNP11309    | <i>Desi</i>      | Ca_Desig_Scaffold03057       | 10255                          | (A/G)       |
| 35715       | CadSNP11310    | <i>Desi</i>      | Ca_Desig_Scaffold03057       | 10526                          | (A/G)       |
| 35716       | CadSNP11311    | <i>Desi</i>      | Ca_Desig_Scaffold03057       | 10537                          | (G/T)       |
| 35717       | CadSNP11312    | <i>Desi</i>      | Ca_Desig_Scaffold03057       | 10582                          | (T/G)       |
| 35718       | CadSNP11313    | <i>Desi</i>      | Ca_Desig_Scaffold03057       | 10553                          | (G/A)       |
| 35719       | CadSNP11314    | <i>Desi</i>      | Ca_Desig_Scaffold03058       | 3689                           | (G/A)       |

| <b>S.N.</b> | <b>SNP IDs</b> | <b>Cultivars</b> | <b>Chromosomes/scaffolds</b> | <b>Physical positions (bp)</b> | <b>SNPs</b> |
|-------------|----------------|------------------|------------------------------|--------------------------------|-------------|
| 35720       | CadSNP11315    | <i>Desi</i>      | Ca_Desig_Scaffold03058       | 3699                           | (A/G)       |
| 35721       | CadSNP11316    | <i>Desi</i>      | Ca_Desig_Scaffold03058       | 23092                          | (G/A)       |
| 35722       | CadSNP11317    | <i>Desi</i>      | Ca_Desig_Scaffold03058       | 24169                          | (A/C)       |
| 35723       | CadSNP11318    | <i>Desi</i>      | Ca_Desig_Scaffold03058       | 24300                          | (A/C)       |
| 35724       | CadSNP11319    | <i>Desi</i>      | Ca_Desig_Scaffold03058       | 30847                          | (G/A)       |
| 35725       | CadSNP11320    | <i>Desi</i>      | Ca_Desig_Scaffold03061       | 4948                           | (T/G)       |
| 35726       | CadSNP11321    | <i>Desi</i>      | Ca_Desig_Scaffold03061       | 4939                           | (C/G)       |
| 35727       | CadSNP11322    | <i>Desi</i>      | Ca_Desig_Scaffold03061       | 4963                           | (C/T)       |
| 35728       | CadSNP11323    | <i>Desi</i>      | Ca_Desig_Scaffold03073       | 165026                         | (G/T)       |
| 35729       | CadSNP11324    | <i>Desi</i>      | Ca_Desig_Scaffold03073       | 165087                         | (T/C)       |
| 35730       | CadSNP11325    | <i>Desi</i>      | Ca_Desig_Scaffold03073       | 333574                         | (T/C)       |
| 35731       | CadSNP11326    | <i>Desi</i>      | Ca_Desig_Scaffold03077       | 6110                           | (G/A)       |
| 35732       | CadSNP11327    | <i>Desi</i>      | Ca_Desig_Scaffold03078       | 24986                          | (G/T)       |
| 35733       | CadSNP11328    | <i>Desi</i>      | Ca_Desig_Scaffold03079       | 16125                          | (T/G)       |
| 35734       | CadSNP11329    | <i>Desi</i>      | Ca_Desig_Scaffold03081       | 18600                          | (G/A)       |
| 35735       | CadSNP11330    | <i>Desi</i>      | Ca_Desig_Scaffold03081       | 21415                          | (T/A)       |
| 35736       | CadSNP11331    | <i>Desi</i>      | Ca_Desig_Scaffold03081       | 21521                          | (A/G)       |
| 35737       | CadSNP11332    | <i>Desi</i>      | Ca_Desig_Scaffold03081       | 21701                          | (T/C)       |
| 35738       | CadSNP11333    | <i>Desi</i>      | Ca_Desig_Scaffold03083       | 13887                          | (A/C)       |
| 35739       | CadSNP11334    | <i>Desi</i>      | Ca_Desig_Scaffold03095       | 20323                          | (C/T)       |
| 35740       | CadSNP11335    | <i>Desi</i>      | Ca_Desig_Scaffold03095       | 20338                          | (C/T)       |
| 35741       | CadSNP11336    | <i>Desi</i>      | Ca_Desig_Scaffold03095       | 20462                          | (C/T)       |
| 35742       | CadSNP11337    | <i>Desi</i>      | Ca_Desig_Scaffold03095       | 20558                          | (C/T)       |
| 35743       | CadSNP11338    | <i>Desi</i>      | Ca_Desig_Scaffold03095       | 20603                          | (T/C)       |
| 35744       | CadSNP11339    | <i>Desi</i>      | Ca_Desig_Scaffold03095       | 23303                          | (C/T)       |
| 35745       | CadSNP11340    | <i>Desi</i>      | Ca_Desig_Scaffold03104       | 19674                          | (G/A)       |
| 35746       | CadSNP11341    | <i>Desi</i>      | Ca_Desig_Scaffold03104       | 19748                          | (C/A)       |
| 35747       | CadSNP11342    | <i>Desi</i>      | Ca_Desig_Scaffold03104       | 19753                          | (C/T)       |
| 35748       | CadSNP11343    | <i>Desi</i>      | Ca_Desig_Scaffold03104       | 19733                          | (A/G)       |
| 35749       | CadSNP11344    | <i>Desi</i>      | Ca_Desig_Scaffold03104       | 19732                          | (T/A)       |
| 35750       | CadSNP11345    | <i>Desi</i>      | Ca_Desig_Scaffold03104       | 19728                          | (G/A)       |
| 35751       | CadSNP11346    | <i>Desi</i>      | Ca_Desig_Scaffold03104       | 19726                          | (T/A)       |
| 35752       | CadSNP11347    | <i>Desi</i>      | Ca_Desig_Scaffold03104       | 19723                          | (T/A)       |
| 35753       | CadSNP11348    | <i>Desi</i>      | Ca_Desig_Scaffold03104       | 19721                          | (T/A)       |
| 35754       | CadSNP11349    | <i>Desi</i>      | Ca_Desig_Scaffold03104       | 19719                          | (C/A)       |
| 35755       | CadSNP11350    | <i>Desi</i>      | Ca_Desig_Scaffold03104       | 19709                          | (G/A)       |
| 35756       | CadSNP11351    | <i>Desi</i>      | Ca_Desig_Scaffold03104       | 19702                          | (G/A)       |
| 35757       | CadSNP11352    | <i>Desi</i>      | Ca_Desig_Scaffold03104       | 19689                          | (T/A)       |

| <b>S.N.</b> | <b>SNP IDs</b> | <b>Cultivars</b> | <b>Chromosomes/scaffolds</b> | <b>Physical positions (bp)</b> | <b>SNPs</b> |
|-------------|----------------|------------------|------------------------------|--------------------------------|-------------|
| 35758       | CadSNP11353    | <i>Desi</i>      | Ca_Desig_Scaffold03104       | 19684                          | (C/A)       |
| 35759       | CadSNP11354    | <i>Desi</i>      | Ca_Desig_Scaffold03110       | 31561                          | (T/C)       |
| 35760       | CadSNP11355    | <i>Desi</i>      | Ca_Desig_Scaffold03111       | 15058                          | (T/C)       |
| 35761       | CadSNP11356    | <i>Desi</i>      | Ca_Desig_Scaffold03113       | 819                            | (T/C)       |
| 35762       | CadSNP11357    | <i>Desi</i>      | Ca_Desig_Scaffold03119       | 2093                           | (C/T)       |
| 35763       | CadSNP11358    | <i>Desi</i>      | Ca_Desig_Scaffold03119       | 2156                           | (G/A)       |
| 35764       | CadSNP11359    | <i>Desi</i>      | Ca_Desig_Scaffold03132       | 13340                          | (C/T)       |
| 35765       | CadSNP11360    | <i>Desi</i>      | Ca_Desig_Scaffold03139       | 31023                          | (A/G)       |
| 35766       | CadSNP11361    | <i>Desi</i>      | Ca_Desig_Scaffold03151       | 27219                          | (T/C)       |
| 35767       | CadSNP11362    | <i>Desi</i>      | Ca_Desig_Scaffold03162       | 168443                         | (G/A)       |
| 35768       | CadSNP11363    | <i>Desi</i>      | Ca_Desig_Scaffold03162       | 229156                         | (C/T)       |
| 35769       | CadSNP11364    | <i>Desi</i>      | Ca_Desig_Scaffold03162       | 261932                         | (A/T)       |
| 35770       | CadSNP11365    | <i>Desi</i>      | Ca_Desig_Scaffold03166       | 30593                          | (T/G)       |
| 35771       | CadSNP11366    | <i>Desi</i>      | Ca_Desig_Scaffold03166       | 30596                          | (A/G)       |
| 35772       | CadSNP11367    | <i>Desi</i>      | Ca_Desig_Scaffold03174       | 28512                          | (T/C)       |
| 35773       | CadSNP11368    | <i>Desi</i>      | Ca_Desig_Scaffold03181       | 13410                          | (C/T)       |
| 35774       | CadSNP11369    | <i>Desi</i>      | Ca_Desig_Scaffold03190       | 14525                          | (C/T)       |
| 35775       | CadSNP11370    | <i>Desi</i>      | Ca_Desig_Scaffold03210       | 6932                           | (G/C)       |
| 35776       | CadSNP11371    | <i>Desi</i>      | Ca_Desig_Scaffold03210       | 6943                           | (T/C)       |
| 35777       | CadSNP11372    | <i>Desi</i>      | Ca_Desig_Scaffold03214       | 22916                          | (C/T)       |
| 35778       | CadSNP11373    | <i>Desi</i>      | Ca_Desig_Scaffold03214       | 23075                          | (C/G)       |
| 35779       | CadSNP11374    | <i>Desi</i>      | Ca_Desig_Scaffold03215       | 29017                          | (C/T)       |
| 35780       | CadSNP11375    | <i>Desi</i>      | Ca_Desig_Scaffold03218       | 14045                          | (T/A)       |
| 35781       | CadSNP11376    | <i>Desi</i>      | Ca_Desig_Scaffold03218       | 14049                          | (A/T)       |
| 35782       | CadSNP11377    | <i>Desi</i>      | Ca_Desig_Scaffold03218       | 14062                          | (T/C)       |
| 35783       | CadSNP11378    | <i>Desi</i>      | Ca_Desig_Scaffold03218       | 14189                          | (T/A)       |
| 35784       | CadSNP11379    | <i>Desi</i>      | Ca_Desig_Scaffold03245       | 2984                           | (T/C)       |
| 35785       | CadSNP11380    | <i>Desi</i>      | Ca_Desig_Scaffold03251       | 20474                          | (A/G)       |
| 35786       | CadSNP11381    | <i>Desi</i>      | Ca_Desig_Scaffold03251       | 20547                          | (G/T)       |
| 35787       | CadSNP11382    | <i>Desi</i>      | Ca_Desig_Scaffold03258       | 4390                           | (G/T)       |
| 35788       | CadSNP11383    | <i>Desi</i>      | Ca_Desig_Scaffold03258       | 21328                          | (G/A)       |
| 35789       | CadSNP11384    | <i>Desi</i>      | Ca_Desig_Scaffold03258       | 25620                          | (T/A)       |
| 35790       | CadSNP11385    | <i>Desi</i>      | Ca_Desig_Scaffold03258       | 25644                          | (G/A)       |
| 35791       | CadSNP11386    | <i>Desi</i>      | Ca_Desig_Scaffold03258       | 25682                          | (C/T)       |
| 35792       | CadSNP11387    | <i>Desi</i>      | Ca_Desig_Scaffold03258       | 25729                          | (A/G)       |
| 35793       | CadSNP11388    | <i>Desi</i>      | Ca_Desig_Scaffold03258       | 25720                          | (G/A)       |
| 35794       | CadSNP11389    | <i>Desi</i>      | Ca_Desig_Scaffold03259       | 23145                          | (T/G)       |
| 35795       | CadSNP11390    | <i>Desi</i>      | Ca_Desig_Scaffold03259       | 23167                          | (T/C)       |



| <b>S.N.</b> | <b>SNP IDs</b> | <b>Cultivars</b> | <b>Chromosomes/scaffolds</b> | <b>Physical positions (bp)</b> | <b>SNPs</b> |
|-------------|----------------|------------------|------------------------------|--------------------------------|-------------|
| 35796       | CadSNP11391    | <i>Desi</i>      | Ca_Desig_Scaffold03259       | 23210                          | (C/G)       |
| 35797       | CadSNP11392    | <i>Desi</i>      | Ca_Desig_Scaffold03259       | 23260                          | (A/G)       |
| 35798       | CadSNP11393    | <i>Desi</i>      | Ca_Desig_Scaffold03259       | 23259                          | (C/T)       |
| 35799       | CadSNP11394    | <i>Desi</i>      | Ca_Desig_Scaffold03259       | 23251                          | (A/C)       |
| 35800       | CadSNP11395    | <i>Desi</i>      | Ca_Desig_Scaffold03259       | 23206                          | (G/A)       |
| 35801       | CadSNP11396    | <i>Desi</i>      | Ca_Desig_Scaffold03260       | 14198                          | (C/T)       |
| 35802       | CadSNP11397    | <i>Desi</i>      | Ca_Desig_Scaffold03261       | 6796                           | (C/T)       |
| 35803       | CadSNP11398    | <i>Desi</i>      | Ca_Desig_Scaffold03261       | 16396                          | (C/T)       |
| 35804       | CadSNP11399    | <i>Desi</i>      | Ca_Desig_Scaffold03271       | 11328                          | (G/A)       |
| 35805       | CadSNP11400    | <i>Desi</i>      | Ca_Desig_Scaffold03271       | 11327                          | (C/T)       |
| 35806       | CadSNP11401    | <i>Desi</i>      | Ca_Desig_Scaffold03271       | 11281                          | (T/A)       |
| 35807       | CadSNP11402    | <i>Desi</i>      | Ca_Desig_Scaffold03271       | 16437                          | (T/G)       |
| 35808       | CadSNP11403    | <i>Desi</i>      | Ca_Desig_Scaffold03271       | 26593                          | (G/C)       |
| 35809       | CadSNP11404    | <i>Desi</i>      | Ca_Desig_Scaffold03284       | 7702                           | (T/A)       |
| 35810       | CadSNP11405    | <i>Desi</i>      | Ca_Desig_Scaffold03284       | 9702                           | (G/A)       |
| 35811       | CadSNP11406    | <i>Desi</i>      | Ca_Desig_Scaffold03284       | 18795                          | (A/T)       |
| 35812       | CadSNP11407    | <i>Desi</i>      | Ca_Desig_Scaffold03284       | 18846                          | (A/T)       |
| 35813       | CadSNP11408    | <i>Desi</i>      | Ca_Desig_Scaffold03286       | 19134                          | (A/C)       |
| 35814       | CadSNP11409    | <i>Desi</i>      | Ca_Desig_Scaffold03297       | 19947                          | (C/T)       |
| 35815       | CadSNP11410    | <i>Desi</i>      | Ca_Desig_Scaffold03310       | 67531                          | (A/G)       |
| 35816       | CadSNP11411    | <i>Desi</i>      | Ca_Desig_Scaffold03310       | 67541                          | (C/G)       |
| 35817       | CadSNP11412    | <i>Desi</i>      | Ca_Desig_Scaffold03319       | 21985                          | (G/T)       |
| 35818       | CadSNP11413    | <i>Desi</i>      | Ca_Desig_Scaffold03328       | 18570                          | (A/C)       |
| 35819       | CadSNP11414    | <i>Desi</i>      | Ca_Desig_Scaffold03330       | 14720                          | (C/T)       |
| 35820       | CadSNP11415    | <i>Desi</i>      | Ca_Desig_Scaffold03333       | 16190                          | (A/T)       |
| 35821       | CadSNP11416    | <i>Desi</i>      | Ca_Desig_Scaffold03344       | 4909                           | (T/A)       |
| 35822       | CadSNP11417    | <i>Desi</i>      | Ca_Desig_Scaffold03357       | 22184                          | (G/A)       |
| 35823       | CadSNP11418    | <i>Desi</i>      | Ca_Desig_Scaffold03357       | 25734                          | (C/T)       |
| 35824       | CadSNP11419    | <i>Desi</i>      | Ca_Desig_Scaffold03370       | 535                            | (C/T)       |
| 35825       | CadSNP11420    | <i>Desi</i>      | Ca_Desig_Scaffold03370       | 565                            | (A/T)       |
| 35826       | CadSNP11421    | <i>Desi</i>      | Ca_Desig_Scaffold03373       | 19953                          | (G/C)       |
| 35827       | CadSNP11422    | <i>Desi</i>      | Ca_Desig_Scaffold03373       | 19987                          | (A/G)       |
| 35828       | CadSNP11423    | <i>Desi</i>      | Ca_Desig_Scaffold03373       | 19991                          | (C/T)       |
| 35829       | CadSNP11424    | <i>Desi</i>      | Ca_Desig_Scaffold03373       | 20077                          | (A/G)       |
| 35830       | CadSNP11425    | <i>Desi</i>      | Ca_Desig_Scaffold03373       | 20076                          | (T/C)       |
| 35831       | CadSNP11426    | <i>Desi</i>      | Ca_Desig_Scaffold03373       | 20075                          | (A/G)       |
| 35832       | CadSNP11427    | <i>Desi</i>      | Ca_Desig_Scaffold03373       | 20043                          | (T/A)       |
| 35833       | CadSNP11428    | <i>Desi</i>      | Ca_Desig_Scaffold03390       | 7000                           | (A/C)       |

| <b>S.N.</b> | <b>SNP IDs</b> | <b>Cultivars</b> | <b>Chromosomes/scaffolds</b> | <b>Physical positions (bp)</b> | <b>SNPs</b> |
|-------------|----------------|------------------|------------------------------|--------------------------------|-------------|
| 35834       | CadSNP11429    | <i>Desi</i>      | Ca_Desig_Scaffold03390       | 7005                           | (A/T)       |
| 35835       | CadSNP11430    | <i>Desi</i>      | Ca_Desig_Scaffold03390       | 7006                           | (A/C)       |
| 35836       | CadSNP11431    | <i>Desi</i>      | Ca_Desig_Scaffold03390       | 7010                           | (A/T)       |
| 35837       | CadSNP11432    | <i>Desi</i>      | Ca_Desig_Scaffold03390       | 7011                           | (A/T)       |
| 35838       | CadSNP11433    | <i>Desi</i>      | Ca_Desig_Scaffold03390       | 7016                           | (T/A)       |
| 35839       | CadSNP11434    | <i>Desi</i>      | Ca_Desig_Scaffold03411       | 831                            | (T/C)       |
| 35840       | CadSNP11435    | <i>Desi</i>      | Ca_Desig_Scaffold03415       | 27496                          | (A/G)       |
| 35841       | CadSNP11436    | <i>Desi</i>      | Ca_Desig_Scaffold03417       | 15687                          | (T/C)       |
| 35842       | CadSNP11437    | <i>Desi</i>      | Ca_Desig_Scaffold03417       | 33534                          | (G/A)       |
| 35843       | CadSNP11438    | <i>Desi</i>      | Ca_Desig_Scaffold03418       | 14337                          | (T/G)       |
| 35844       | CadSNP11439    | <i>Desi</i>      | Ca_Desig_Scaffold03418       | 14370                          | (A/G)       |
| 35845       | CadSNP11440    | <i>Desi</i>      | Ca_Desig_Scaffold03421       | 8791                           | (T/A)       |
| 35846       | CadSNP11441    | <i>Desi</i>      | Ca_Desig_Scaffold03429       | 8268                           | (A/T)       |
| 35847       | CadSNP11442    | <i>Desi</i>      | Ca_Desig_Scaffold03429       | 8385                           | (C/T)       |
| 35848       | CadSNP11443    | <i>Desi</i>      | Ca_Desig_Scaffold03429       | 8322                           | (C/T)       |
| 35849       | CadSNP11444    | <i>Desi</i>      | Ca_Desig_Scaffold03429       | 23018                          | (A/G)       |
| 35850       | CadSNP11445    | <i>Desi</i>      | Ca_Desig_Scaffold03429       | 23349                          | (A/G)       |
| 35851       | CadSNP11446    | <i>Desi</i>      | Ca_Desig_Scaffold03429       | 23628                          | (G/A)       |
| 35852       | CadSNP11447    | <i>Desi</i>      | Ca_Desig_Scaffold03429       | 23820                          | (G/A)       |
| 35853       | CadSNP11448    | <i>Desi</i>      | Ca_Desig_Scaffold03429       | 26838                          | (T/A)       |
| 35854       | CadSNP11449    | <i>Desi</i>      | Ca_Desig_Scaffold03429       | 26845                          | (T/A)       |
| 35855       | CadSNP11450    | <i>Desi</i>      | Ca_Desig_Scaffold03429       | 29075                          | (C/T)       |
| 35856       | CadSNP11451    | <i>Desi</i>      | Ca_Desig_Scaffold03434       | 22578                          | (G/T)       |
| 35857       | CadSNP11452    | <i>Desi</i>      | Ca_Desig_Scaffold03434       | 22581                          | (A/T)       |
| 35858       | CadSNP11453    | <i>Desi</i>      | Ca_Desig_Scaffold03434       | 22589                          | (C/T)       |
| 35859       | CadSNP11454    | <i>Desi</i>      | Ca_Desig_Scaffold03434       | 22591                          | (G/T)       |
| 35860       | CadSNP11455    | <i>Desi</i>      | Ca_Desig_Scaffold03434       | 22596                          | (G/A)       |
| 35861       | CadSNP11456    | <i>Desi</i>      | Ca_Desig_Scaffold03434       | 22602                          | (G/C)       |
| 35862       | CadSNP11457    | <i>Desi</i>      | Ca_Desig_Scaffold03434       | 22608                          | (A/T)       |
| 35863       | CadSNP11458    | <i>Desi</i>      | Ca_Desig_Scaffold03434       | 22614                          | (T/A)       |
| 35864       | CadSNP11459    | <i>Desi</i>      | Ca_Desig_Scaffold03434       | 22626                          | (A/T)       |
| 35865       | CadSNP11460    | <i>Desi</i>      | Ca_Desig_Scaffold03434       | 22644                          | (T/C)       |
| 35866       | CadSNP11461    | <i>Desi</i>      | Ca_Desig_Scaffold03434       | 24876                          | (A/G)       |
| 35867       | CadSNP11462    | <i>Desi</i>      | Ca_Desig_Scaffold03434       | 24878                          | (G/T)       |
| 35868       | CadSNP11463    | <i>Desi</i>      | Ca_Desig_Scaffold03434       | 24893                          | (T/A)       |
| 35869       | CadSNP11464    | <i>Desi</i>      | Ca_Desig_Scaffold03434       | 24899                          | (C/A)       |
| 35870       | CadSNP11465    | <i>Desi</i>      | Ca_Desig_Scaffold03434       | 24901                          | (C/T)       |
| 35871       | CadSNP11466    | <i>Desi</i>      | Ca_Desig_Scaffold03434       | 24902                          | (A/T)       |

| <b>S.N.</b> | <b>SNP IDs</b> | <b>Cultivars</b> | <b>Chromosomes/scaffolds</b> | <b>Physical positions (bp)</b> | <b>SNPs</b> |
|-------------|----------------|------------------|------------------------------|--------------------------------|-------------|
| 35872       | CadSNP11467    | <i>Desi</i>      | Ca_Desig_Scaffold03434       | 24911                          | (A/C)       |
| 35873       | CadSNP11468    | <i>Desi</i>      | Ca_Desig_Scaffold03434       | 24917                          | (T/C)       |
| 35874       | CadSNP11469    | <i>Desi</i>      | Ca_Desig_Scaffold03434       | 24920                          | (T/C)       |
| 35875       | CadSNP11470    | <i>Desi</i>      | Ca_Desig_Scaffold03439       | 12583                          | (C/A)       |
| 35876       | CadSNP11471    | <i>Desi</i>      | Ca_Desig_Scaffold03463       | 9139                           | (T/C)       |
| 35877       | CadSNP11472    | <i>Desi</i>      | Ca_Desig_Scaffold03463       | 10279                          | (G/C)       |
| 35878       | CadSNP11473    | <i>Desi</i>      | Ca_Desig_Scaffold03463       | 10368                          | (G/A)       |
| 35879       | CadSNP11474    | <i>Desi</i>      | Ca_Desig_Scaffold03463       | 10734                          | (T/C)       |
| 35880       | CadSNP11475    | <i>Desi</i>      | Ca_Desig_Scaffold03463       | 10787                          | (T/C)       |
| 35881       | CadSNP11476    | <i>Desi</i>      | Ca_Desig_Scaffold03463       | 10861                          | (G/C)       |
| 35882       | CadSNP11477    | <i>Desi</i>      | Ca_Desig_Scaffold03463       | 10928                          | (G/A)       |
| 35883       | CadSNP11478    | <i>Desi</i>      | Ca_Desig_Scaffold03463       | 10931                          | (T/G)       |
| 35884       | CadSNP11479    | <i>Desi</i>      | Ca_Desig_Scaffold03463       | 13555                          | (T/C)       |
| 35885       | CadSNP11480    | <i>Desi</i>      | Ca_Desig_Scaffold03463       | 13818                          | (G/A)       |
| 35886       | CadSNP11481    | <i>Desi</i>      | Ca_Desig_Scaffold03463       | 13851                          | (C/T)       |
| 35887       | CadSNP11482    | <i>Desi</i>      | Ca_Desig_Scaffold03463       | 13866                          | (G/A)       |
| 35888       | CadSNP11483    | <i>Desi</i>      | Ca_Desig_Scaffold03463       | 13884                          | (G/A)       |
| 35889       | CadSNP11484    | <i>Desi</i>      | Ca_Desig_Scaffold03463       | 13893                          | (T/C)       |
| 35890       | CadSNP11485    | <i>Desi</i>      | Ca_Desig_Scaffold03463       | 13915                          | (T/C)       |
| 35891       | CadSNP11486    | <i>Desi</i>      | Ca_Desig_Scaffold03463       | 14193                          | (A/G)       |
| 35892       | CadSNP11487    | <i>Desi</i>      | Ca_Desig_Scaffold03463       | 14232                          | (A/G)       |
| 35893       | CadSNP11488    | <i>Desi</i>      | Ca_Desig_Scaffold03487       | 27846                          | (C/A)       |
| 35894       | CadSNP11489    | <i>Desi</i>      | Ca_Desig_Scaffold03487       | 27850                          | (C/G)       |
| 35895       | CadSNP11490    | <i>Desi</i>      | Ca_Desig_Scaffold03489       | 14978                          | (T/C)       |
| 35896       | CadSNP11491    | <i>Desi</i>      | Ca_Desig_Scaffold03500       | 22980                          | (T/C)       |
| 35897       | CadSNP11492    | <i>Desi</i>      | Ca_Desig_Scaffold03514       | 26375                          | (A/T)       |
| 35898       | CadSNP11493    | <i>Desi</i>      | Ca_Desig_Scaffold03514       | 26396                          | (C/A)       |
| 35899       | CadSNP11494    | <i>Desi</i>      | Ca_Desig_Scaffold03514       | 26412                          | (T/C)       |
| 35900       | CadSNP11495    | <i>Desi</i>      | Ca_Desig_Scaffold03514       | 26427                          | (C/T)       |
| 35901       | CadSNP11496    | <i>Desi</i>      | Ca_Desig_Scaffold03515       | 8953                           | (A/G)       |
| 35902       | CadSNP11497    | <i>Desi</i>      | Ca_Desig_Scaffold03515       | 8960                           | (T/G)       |
| 35903       | CadSNP11498    | <i>Desi</i>      | Ca_Desig_Scaffold03538       | 14877                          | (G/A)       |
| 35904       | CadSNP11499    | <i>Desi</i>      | Ca_Desig_Scaffold03538       | 14902                          | (T/A)       |
| 35905       | CadSNP11500    | <i>Desi</i>      | Ca_Desig_Scaffold03538       | 14939                          | (A/T)       |
| 35906       | CadSNP11501    | <i>Desi</i>      | Ca_Desig_Scaffold03543       | 20778                          | (A/G)       |
| 35907       | CadSNP11502    | <i>Desi</i>      | Ca_Desig_Scaffold03544       | 12308                          | (C/T)       |
| 35908       | CadSNP11503    | <i>Desi</i>      | Ca_Desig_Scaffold03544       | 12310                          | (T/A)       |
| 35909       | CadSNP11504    | <i>Desi</i>      | Ca_Desig_Scaffold03544       | 12353                          | (G/T)       |

| <b>S.N.</b> | <b>SNP IDs</b> | <b>Cultivars</b> | <b>Chromosomes/scaffolds</b> | <b>Physical positions (bp)</b> | <b>SNPs</b> |
|-------------|----------------|------------------|------------------------------|--------------------------------|-------------|
| 35910       | CadSNP11505    | <i>Desi</i>      | Ca_Desig_Scaffold03544       | 27863                          | (A/T)       |
| 35911       | CadSNP11506    | <i>Desi</i>      | Ca_Desig_Scaffold03544       | 27857                          | (G/A)       |
| 35912       | CadSNP11507    | <i>Desi</i>      | Ca_Desig_Scaffold03548       | 156                            | (G/A)       |
| 35913       | CadSNP11508    | <i>Desi</i>      | Ca_Desig_Scaffold03548       | 182                            | (C/T)       |
| 35914       | CadSNP11509    | <i>Desi</i>      | Ca_Desig_Scaffold03548       | 191                            | (A/G)       |
| 35915       | CadSNP11510    | <i>Desi</i>      | Ca_Desig_Scaffold03549       | 7632                           | (G/A)       |
| 35916       | CadSNP11511    | <i>Desi</i>      | Ca_Desig_Scaffold03562       | 12541                          | (G/T)       |
| 35917       | CadSNP11512    | <i>Desi</i>      | Ca_Desig_Scaffold03562       | 12753                          | (T/G)       |
| 35918       | CadSNP11513    | <i>Desi</i>      | Ca_Desig_Scaffold03562       | 12695                          | (T/A)       |
| 35919       | CadSNP11514    | <i>Desi</i>      | Ca_Desig_Scaffold03562       | 21501                          | (C/A)       |
| 35920       | CadSNP11515    | <i>Desi</i>      | Ca_Desig_Scaffold03562       | 21611                          | (C/T)       |
| 35921       | CadSNP11516    | <i>Desi</i>      | Ca_Desig_Scaffold03562       | 21584                          | (G/C)       |
| 35922       | CadSNP11517    | <i>Desi</i>      | Ca_Desig_Scaffold03562       | 22842                          | (G/T)       |
| 35923       | CadSNP11518    | <i>Desi</i>      | Ca_Desig_Scaffold03562       | 22832                          | (A/T)       |
| 35924       | CadSNP11519    | <i>Desi</i>      | Ca_Desig_Scaffold03563       | 1235                           | (G/C)       |
| 35925       | CadSNP11520    | <i>Desi</i>      | Ca_Desig_Scaffold03563       | 1622                           | (T/G)       |
| 35926       | CadSNP11521    | <i>Desi</i>      | Ca_Desig_Scaffold03563       | 1625                           | (T/G)       |
| 35927       | CadSNP11522    | <i>Desi</i>      | Ca_Desig_Scaffold03563       | 26115                          | (A/G)       |
| 35928       | CadSNP11523    | <i>Desi</i>      | Ca_Desig_Scaffold03576       | 595                            | (C/T)       |
| 35929       | CadSNP11524    | <i>Desi</i>      | Ca_Desig_Scaffold03608       | 902                            | (C/T)       |
| 35930       | CadSNP11525    | <i>Desi</i>      | Ca_Desig_Scaffold03608       | 894                            | (G/A)       |
| 35931       | CadSNP11526    | <i>Desi</i>      | Ca_Desig_Scaffold03608       | 883                            | (T/A)       |
| 35932       | CadSNP11527    | <i>Desi</i>      | Ca_Desig_Scaffold03608       | 871                            | (C/A)       |
| 35933       | CadSNP11528    | <i>Desi</i>      | Ca_Desig_Scaffold03608       | 947                            | (T/C)       |
| 35934       | CadSNP11529    | <i>Desi</i>      | Ca_Desig_Scaffold03622       | 6797                           | (T/C)       |
| 35935       | CadSNP11530    | <i>Desi</i>      | Ca_Desig_Scaffold03633       | 7767                           | (T/C)       |
| 35936       | CadSNP11531    | <i>Desi</i>      | Ca_Desig_Scaffold03633       | 7911                           | (A/T)       |
| 35937       | CadSNP11532    | <i>Desi</i>      | Ca_Desig_Scaffold03633       | 7904                           | (G/A)       |
| 35938       | CadSNP11533    | <i>Desi</i>      | Ca_Desig_Scaffold03633       | 22120                          | (T/C)       |
| 35939       | CadSNP11534    | <i>Desi</i>      | Ca_Desig_Scaffold03633       | 22160                          | (G/C)       |
| 35940       | CadSNP11535    | <i>Desi</i>      | Ca_Desig_Scaffold03633       | 22176                          | (G/T)       |
| 35941       | CadSNP11536    | <i>Desi</i>      | Ca_Desig_Scaffold03633       | 22255                          | (C/T)       |
| 35942       | CadSNP11537    | <i>Desi</i>      | Ca_Desig_Scaffold03633       | 22279                          | (C/T)       |
| 35943       | CadSNP11538    | <i>Desi</i>      | Ca_Desig_Scaffold03636       | 15741                          | (T/G)       |
| 35944       | CadSNP11539    | <i>Desi</i>      | Ca_Desig_Scaffold03636       | 15824                          | (G/T)       |
| 35945       | CadSNP11540    | <i>Desi</i>      | Ca_Desig_Scaffold03640       | 12228                          | (G/A)       |
| 35946       | CadSNP11541    | <i>Desi</i>      | Ca_Desig_Scaffold03640       | 21482                          | (C/A)       |
| 35947       | CadSNP11542    | <i>Desi</i>      | Ca_Desig_Scaffold03640       | 21471                          | (G/T)       |

| <b>S.N.</b> | <b>SNP IDs</b> | <b>Cultivars</b> | <b>Chromosomes/scaffolds</b> | <b>Physical positions (bp)</b> | <b>SNPs</b> |
|-------------|----------------|------------------|------------------------------|--------------------------------|-------------|
| 35948       | CadSNP11543    | <i>Desi</i>      | Ca_Desig_Scaffold03640       | 21449                          | (T/C)       |
| 35949       | CadSNP11544    | <i>Desi</i>      | Ca_Desig_Scaffold03640       | 21439                          | (C/T)       |
| 35950       | CadSNP11545    | <i>Desi</i>      | Ca_Desig_Scaffold03640       | 21437                          | (T/C)       |
| 35951       | CadSNP11546    | <i>Desi</i>      | Ca_Desig_Scaffold03640       | 21436                          | (T/A)       |
| 35952       | CadSNP11547    | <i>Desi</i>      | Ca_Desig_Scaffold03640       | 21430                          | (G/T)       |
| 35953       | CadSNP11548    | <i>Desi</i>      | Ca_Desig_Scaffold03645       | 21700                          | (G/A)       |
| 35954       | CadSNP11549    | <i>Desi</i>      | Ca_Desig_Scaffold03645       | 21721                          | (A/T)       |
| 35955       | CadSNP11550    | <i>Desi</i>      | Ca_Desig_Scaffold03648       | 13100                          | (C/A)       |
| 35956       | CadSNP11551    | <i>Desi</i>      | Ca_Desig_Scaffold03649       | 20806                          | (T/C)       |
| 35957       | CadSNP11552    | <i>Desi</i>      | Ca_Desig_Scaffold03653       | 11156                          | (G/C)       |
| 35958       | CadSNP11553    | <i>Desi</i>      | Ca_Desig_Scaffold03654       | 4942                           | (T/C)       |
| 35959       | CadSNP11554    | <i>Desi</i>      | Ca_Desig_Scaffold03654       | 4956                           | (C/A)       |
| 35960       | CadSNP11555    | <i>Desi</i>      | Ca_Desig_Scaffold03654       | 4965                           | (G/A)       |
| 35961       | CadSNP11556    | <i>Desi</i>      | Ca_Desig_Scaffold03654       | 4983                           | (A/G)       |
| 35962       | CadSNP11557    | <i>Desi</i>      | Ca_Desig_Scaffold03654       | 4996                           | (G/A)       |
| 35963       | CadSNP11558    | <i>Desi</i>      | Ca_Desig_Scaffold03654       | 5077                           | (T/A)       |
| 35964       | CadSNP11559    | <i>Desi</i>      | Ca_Desig_Scaffold03654       | 5055                           | (A/G)       |
| 35965       | CadSNP11560    | <i>Desi</i>      | Ca_Desig_Scaffold03654       | 5033                           | (A/G)       |
| 35966       | CadSNP11561    | <i>Desi</i>      | Ca_Desig_Scaffold03661       | 3853                           | (G/T)       |
| 35967       | CadSNP11562    | <i>Desi</i>      | Ca_Desig_Scaffold03661       | 3859                           | (A/G)       |
| 35968       | CadSNP11563    | <i>Desi</i>      | Ca_Desig_Scaffold03669       | 1331                           | (G/A)       |
| 35969       | CadSNP11564    | <i>Desi</i>      | Ca_Desig_Scaffold03669       | 1330                           | (A/G)       |
| 35970       | CadSNP11565    | <i>Desi</i>      | Ca_Desig_Scaffold03676       | 4255                           | (A/G)       |
| 35971       | CadSNP11566    | <i>Desi</i>      | Ca_Desig_Scaffold03676       | 4258                           | (C/G)       |
| 35972       | CadSNP11567    | <i>Desi</i>      | Ca_Desig_Scaffold03676       | 4264                           | (A/G)       |
| 35973       | CadSNP11568    | <i>Desi</i>      | Ca_Desig_Scaffold03676       | 17534                          | (A/T)       |
| 35974       | CadSNP11569    | <i>Desi</i>      | Ca_Desig_Scaffold03676       | 17564                          | (T/C)       |
| 35975       | CadSNP11570    | <i>Desi</i>      | Ca_Desig_Scaffold03676       | 17589                          | (A/G)       |
| 35976       | CadSNP11571    | <i>Desi</i>      | Ca_Desig_Scaffold03704       | 10633                          | (T/G)       |
| 35977       | CadSNP11572    | <i>Desi</i>      | Ca_Desig_Scaffold03704       | 10646                          | (A/G)       |
| 35978       | CadSNP11573    | <i>Desi</i>      | Ca_Desig_Scaffold03704       | 10648                          | (T/G)       |
| 35979       | CadSNP11574    | <i>Desi</i>      | Ca_Desig_Scaffold03716       | 3775                           | (C/T)       |
| 35980       | CadSNP11575    | <i>Desi</i>      | Ca_Desig_Scaffold03723       | 8302                           | (C/T)       |
| 35981       | CadSNP11576    | <i>Desi</i>      | Ca_Desig_Scaffold03723       | 8431                           | (T/C)       |
| 35982       | CadSNP11577    | <i>Desi</i>      | Ca_Desig_Scaffold03723       | 8401                           | (T/G)       |
| 35983       | CadSNP11578    | <i>Desi</i>      | Ca_Desig_Scaffold03723       | 8390                           | (T/C)       |
| 35984       | CadSNP11579    | <i>Desi</i>      | Ca_Desig_Scaffold03724       | 509                            | (C/A)       |
| 35985       | CadSNP11580    | <i>Desi</i>      | Ca_Desig_Scaffold03724       | 500                            | (T/A)       |

| <b>S.N.</b> | <b>SNP IDs</b> | <b>Cultivars</b> | <b>Chromosomes/scaffolds</b> | <b>Physical positions (bp)</b> | <b>SNPs</b> |
|-------------|----------------|------------------|------------------------------|--------------------------------|-------------|
| 35986       | CadSNP11581    | <i>Desi</i>      | Ca_Desig_Scaffold03724       | 466                            | (G/A)       |
| 35987       | CadSNP11582    | <i>Desi</i>      | Ca_Desig_Scaffold03726       | 49884                          | (G/A)       |
| 35988       | CadSNP11583    | <i>Desi</i>      | Ca_Desig_Scaffold03730       | 44140                          | (C/A)       |
| 35989       | CadSNP11584    | <i>Desi</i>      | Ca_Desig_Scaffold03730       | 53937                          | (C/A)       |
| 35990       | CadSNP11585    | <i>Desi</i>      | Ca_Desig_Scaffold03730       | 53960                          | (C/A)       |
| 35991       | CadSNP11586    | <i>Desi</i>      | Ca_Desig_Scaffold03730       | 54102                          | (C/A)       |
| 35992       | CadSNP11587    | <i>Desi</i>      | Ca_Desig_Scaffold03730       | 70680                          | (C/T)       |
| 35993       | CadSNP11588    | <i>Desi</i>      | Ca_Desig_Scaffold03730       | 70907                          | (C/T)       |
| 35994       | CadSNP11589    | <i>Desi</i>      | Ca_Desig_Scaffold03733       | 23706                          | (C/T)       |
| 35995       | CadSNP11590    | <i>Desi</i>      | Ca_Desig_Scaffold03733       | 23721                          | (C/A)       |
| 35996       | CadSNP11591    | <i>Desi</i>      | Ca_Desig_Scaffold03733       | 23740                          | (C/T)       |
| 35997       | CadSNP11592    | <i>Desi</i>      | Ca_Desig_Scaffold03733       | 23755                          | (G/A)       |
| 35998       | CadSNP11593    | <i>Desi</i>      | Ca_Desig_Scaffold03733       | 23753                          | (C/T)       |
| 35999       | CadSNP11594    | <i>Desi</i>      | Ca_Desig_Scaffold03741       | 2977                           | (C/T)       |
| 36000       | CadSNP11595    | <i>Desi</i>      | Ca_Desig_Scaffold03741       | 8721                           | (A/G)       |
| 36001       | CadSNP11596    | <i>Desi</i>      | Ca_Desig_Scaffold03741       | 13393                          | (A/G)       |
| 36002       | CadSNP11597    | <i>Desi</i>      | Ca_Desig_Scaffold03741       | 13346                          | (C/G)       |
| 36003       | CadSNP11598    | <i>Desi</i>      | Ca_Desig_Scaffold03741       | 18261                          | (T/A)       |
| 36004       | CadSNP11599    | <i>Desi</i>      | Ca_Desig_Scaffold03745       | 5575                           | (A/G)       |
| 36005       | CadSNP11600    | <i>Desi</i>      | Ca_Desig_Scaffold03745       | 21904                          | (G/T)       |
| 36006       | CadSNP11601    | <i>Desi</i>      | Ca_Desig_Scaffold03745       | 22942                          | (G/A)       |
| 36007       | CadSNP11602    | <i>Desi</i>      | Ca_Desig_Scaffold03755       | 16306                          | (C/T)       |
| 36008       | CadSNP11603    | <i>Desi</i>      | Ca_Desig_Scaffold03758       | 11128                          | (A/G)       |
| 36009       | CadSNP11604    | <i>Desi</i>      | Ca_Desig_Scaffold03758       | 16097                          | (G/A)       |
| 36010       | CadSNP11605    | <i>Desi</i>      | Ca_Desig_Scaffold03761       | 12175                          | (G/C)       |
| 36011       | CadSNP11606    | <i>Desi</i>      | Ca_Desig_Scaffold03761       | 12711                          | (T/G)       |
| 36012       | CadSNP11607    | <i>Desi</i>      | Ca_Desig_Scaffold03761       | 12738                          | (C/T)       |
| 36013       | CadSNP11608    | <i>Desi</i>      | Ca_Desig_Scaffold03792       | 19552                          | (G/A)       |
| 36014       | CadSNP11609    | <i>Desi</i>      | Ca_Desig_Scaffold03792       | 19610                          | (T/C)       |
| 36015       | CadSNP11610    | <i>Desi</i>      | Ca_Desig_Scaffold03792       | 19667                          | (C/G)       |
| 36016       | CadSNP11611    | <i>Desi</i>      | Ca_Desig_Scaffold03804       | 19247                          | (T/C)       |
| 36017       | CadSNP11612    | <i>Desi</i>      | Ca_Desig_Scaffold03804       | 19257                          | (T/C)       |
| 36018       | CadSNP11613    | <i>Desi</i>      | Ca_Desig_Scaffold03804       | 19283                          | (T/G)       |
| 36019       | CadSNP11614    | <i>Desi</i>      | Ca_Desig_Scaffold03813       | 11006                          | (C/T)       |
| 36020       | CadSNP11615    | <i>Desi</i>      | Ca_Desig_Scaffold03813       | 11002                          | (G/A)       |
| 36021       | CadSNP11616    | <i>Desi</i>      | Ca_Desig_Scaffold03813       | 10969                          | (G/T)       |
| 36022       | CadSNP11617    | <i>Desi</i>      | Ca_Desig_Scaffold03857       | 24746                          | (G/A)       |
| 36023       | CadSNP11618    | <i>Desi</i>      | Ca_Desig_Scaffold03870       | 12579                          | (A/T)       |

| <b>S.N.</b> | <b>SNP IDs</b> | <b>Cultivars</b> | <b>Chromosomes/scaffolds</b> | <b>Physical positions (bp)</b> | <b>SNPs</b> |
|-------------|----------------|------------------|------------------------------|--------------------------------|-------------|
| 36024       | CadSNP11619    | <i>Desi</i>      | Ca_Desig_Scaffold03888       | 19259                          | (A/T)       |
| 36025       | CadSNP11620    | <i>Desi</i>      | Ca_Desig_Scaffold03888       | 19294                          | (G/A)       |
| 36026       | CadSNP11621    | <i>Desi</i>      | Ca_Desig_Scaffold03903       | 19335                          | (C/A)       |
| 36027       | CadSNP11622    | <i>Desi</i>      | Ca_Desig_Scaffold03903       | 19382                          | (G/C)       |
| 36028       | CadSNP11623    | <i>Desi</i>      | Ca_Desig_Scaffold03903       | 19367                          | (T/A)       |
| 36029       | CadSNP11624    | <i>Desi</i>      | Ca_Desig_Scaffold03903       | 19310                          | (G/A)       |
| 36030       | CadSNP11625    | <i>Desi</i>      | Ca_Desig_Scaffold03903       | 19308                          | (A/C)       |
| 36031       | CadSNP11626    | <i>Desi</i>      | Ca_Desig_Scaffold03907       | 7841                           | (C/T)       |
| 36032       | CadSNP11627    | <i>Desi</i>      | Ca_Desig_Scaffold03907       | 7987                           | (A/T)       |
| 36033       | CadSNP11628    | <i>Desi</i>      | Ca_Desig_Scaffold03907       | 8062                           | (C/T)       |
| 36034       | CadSNP11629    | <i>Desi</i>      | Ca_Desig_Scaffold03910       | 21972                          | (G/A)       |
| 36035       | CadSNP11630    | <i>Desi</i>      | Ca_Desig_Scaffold03916       | 3991                           | (C/A)       |
| 36036       | CadSNP11631    | <i>Desi</i>      | Ca_Desig_Scaffold03916       | 4202                           | (T/C)       |
| 36037       | CadSNP11632    | <i>Desi</i>      | Ca_Desig_Scaffold03916       | 4198                           | (C/G)       |
| 36038       | CadSNP11633    | <i>Desi</i>      | Ca_Desig_Scaffold03916       | 4170                           | (C/A)       |
| 36039       | CadSNP11634    | <i>Desi</i>      | Ca_Desig_Scaffold03916       | 4145                           | (G/A)       |
| 36040       | CadSNP11635    | <i>Desi</i>      | Ca_Desig_Scaffold03925       | 21083                          | (T/C)       |
| 36041       | CadSNP11636    | <i>Desi</i>      | Ca_Desig_Scaffold03933       | 15377                          | (A/G)       |
| 36042       | CadSNP11637    | <i>Desi</i>      | Ca_Desig_Scaffold03935       | 17999                          | (C/A)       |
| 36043       | CadSNP11638    | <i>Desi</i>      | Ca_Desig_Scaffold03935       | 18011                          | (A/T)       |
| 36044       | CadSNP11639    | <i>Desi</i>      | Ca_Desig_Scaffold03935       | 18020                          | (T/A)       |
| 36045       | CadSNP11640    | <i>Desi</i>      | Ca_Desig_Scaffold03935       | 18128                          | (C/A)       |
| 36046       | CadSNP11641    | <i>Desi</i>      | Ca_Desig_Scaffold03935       | 18062                          | (A/C)       |
| 36047       | CadSNP11642    | <i>Desi</i>      | Ca_Desig_Scaffold03941       | 618                            | (G/A)       |
| 36048       | CadSNP11643    | <i>Desi</i>      | Ca_Desig_Scaffold03941       | 624                            | (A/G)       |
| 36049       | CadSNP11644    | <i>Desi</i>      | Ca_Desig_Scaffold03941       | 661                            | (T/C)       |
| 36050       | CadSNP11645    | <i>Desi</i>      | Ca_Desig_Scaffold03947       | 18381                          | (C/T)       |
| 36051       | CadSNP11646    | <i>Desi</i>      | Ca_Desig_Scaffold03947       | 18354                          | (G/A)       |
| 36052       | CadSNP11647    | <i>Desi</i>      | Ca_Desig_Scaffold03947       | 18343                          | (G/A)       |
| 36053       | CadSNP11648    | <i>Desi</i>      | Ca_Desig_Scaffold03947       | 18322                          | (G/T)       |
| 36054       | CadSNP11649    | <i>Desi</i>      | Ca_Desig_Scaffold03947       | 18382                          | (T/C)       |
| 36055       | CadSNP11650    | <i>Desi</i>      | Ca_Desig_Scaffold03947       | 18387                          | (C/A)       |
| 36056       | CadSNP11651    | <i>Desi</i>      | Ca_Desig_Scaffold03949       | 11105                          | (C/T)       |
| 36057       | CadSNP11652    | <i>Desi</i>      | Ca_Desig_Scaffold03949       | 11097                          | (A/G)       |
| 36058       | CadSNP11653    | <i>Desi</i>      | Ca_Desig_Scaffold03950       | 2356                           | (G/A)       |
| 36059       | CadSNP11654    | <i>Desi</i>      | Ca_Desig_Scaffold03950       | 2364                           | (C/A)       |
| 36060       | CadSNP11655    | <i>Desi</i>      | Ca_Desig_Scaffold03950       | 2435                           | (C/A)       |
| 36061       | CadSNP11656    | <i>Desi</i>      | Ca_Desig_Scaffold03950       | 20151                          | (G/C)       |

| <b>S.N.</b> | <b>SNP IDs</b> | <b>Cultivars</b> | <b>Chromosomes/scaffolds</b> | <b>Physical positions (bp)</b> | <b>SNPs</b> |
|-------------|----------------|------------------|------------------------------|--------------------------------|-------------|
| 36062       | CadSNP11657    | <i>Desi</i>      | Ca_Desig_Scaffold03971       | 5437                           | (C/A)       |
| 36063       | CadSNP11658    | <i>Desi</i>      | Ca_Desig_Scaffold03978       | 19061                          | (C/T)       |
| 36064       | CadSNP11659    | <i>Desi</i>      | Ca_Desig_Scaffold03978       | 19048                          | (A/C)       |
| 36065       | CadSNP11660    | <i>Desi</i>      | Ca_Desig_Scaffold03982       | 10081                          | (T/C)       |
| 36066       | CadSNP11661    | <i>Desi</i>      | Ca_Desig_Scaffold03984       | 19300                          | (G/A)       |
| 36067       | CadSNP11662    | <i>Desi</i>      | Ca_Desig_Scaffold03984       | 19291                          | (A/G)       |
| 36068       | CadSNP11663    | <i>Desi</i>      | Ca_Desig_Scaffold03985       | 832                            | (T/C)       |
| 36069       | CadSNP11664    | <i>Desi</i>      | Ca_Desig_Scaffold03985       | 836                            | (C/T)       |
| 36070       | CadSNP11665    | <i>Desi</i>      | Ca_Desig_Scaffold03985       | 862                            | (C/T)       |
| 36071       | CadSNP11666    | <i>Desi</i>      | Ca_Desig_Scaffold03985       | 896                            | (C/T)       |
| 36072       | CadSNP11667    | <i>Desi</i>      | Ca_Desig_Scaffold03985       | 901                            | (A/C)       |
| 36073       | CadSNP11668    | <i>Desi</i>      | Ca_Desig_Scaffold03985       | 933                            | (G/T)       |
| 36074       | CadSNP11669    | <i>Desi</i>      | Ca_Desig_Scaffold03985       | 924                            | (G/T)       |
| 36075       | CadSNP11670    | <i>Desi</i>      | Ca_Desig_Scaffold03985       | 922                            | (T/A)       |
| 36076       | CadSNP11671    | <i>Desi</i>      | Ca_Desig_Scaffold03985       | 864                            | (C/G)       |
| 36077       | CadSNP11672    | <i>Desi</i>      | Ca_Desig_Scaffold04008       | 14465                          | (A/T)       |
| 36078       | CadSNP11673    | <i>Desi</i>      | Ca_Desig_Scaffold04008       | 14849                          | (T/G)       |
| 36079       | CadSNP11674    | <i>Desi</i>      | Ca_Desig_Scaffold04025       | 8207                           | (A/G)       |
| 36080       | CadSNP11675    | <i>Desi</i>      | Ca_Desig_Scaffold04025       | 8157                           | (G/A)       |
| 36081       | CadSNP11676    | <i>Desi</i>      | Ca_Desig_Scaffold04028       | 10660                          | (A/T)       |
| 36082       | CadSNP11677    | <i>Desi</i>      | Ca_Desig_Scaffold04028       | 10683                          | (T/C)       |
| 36083       | CadSNP11678    | <i>Desi</i>      | Ca_Desig_Scaffold04028       | 10707                          | (C/T)       |
| 36084       | CadSNP11679    | <i>Desi</i>      | Ca_Desig_Scaffold04033       | 7362                           | (C/T)       |
| 36085       | CadSNP11680    | <i>Desi</i>      | Ca_Desig_Scaffold04040       | 3461                           | (C/T)       |
| 36086       | CadSNP11681    | <i>Desi</i>      | Ca_Desig_Scaffold04040       | 15439                          | (A/C)       |
| 36087       | CadSNP11682    | <i>Desi</i>      | Ca_Desig_Scaffold04040       | 15678                          | (T/C)       |
| 36088       | CadSNP11683    | <i>Desi</i>      | Ca_Desig_Scaffold04040       | 15676                          | (A/C)       |
| 36089       | CadSNP11684    | <i>Desi</i>      | Ca_Desig_Scaffold04052       | 10199                          | (C/T)       |
| 36090       | CadSNP11685    | <i>Desi</i>      | Ca_Desig_Scaffold04073       | 14883                          | (G/T)       |
| 36091       | CadSNP11686    | <i>Desi</i>      | Ca_Desig_Scaffold04076       | 2488                           | (G/A)       |
| 36092       | CadSNP11687    | <i>Desi</i>      | Ca_Desig_Scaffold04076       | 2471                           | (C/T)       |
| 36093       | CadSNP11688    | <i>Desi</i>      | Ca_Desig_Scaffold04076       | 2468                           | (T/A)       |
| 36094       | CadSNP11689    | <i>Desi</i>      | Ca_Desig_Scaffold04082       | 2195                           | (C/T)       |
| 36095       | CadSNP11690    | <i>Desi</i>      | Ca_Desig_Scaffold04085       | 1688                           | (A/G)       |
| 36096       | CadSNP11691    | <i>Desi</i>      | Ca_Desig_Scaffold04085       | 1686                           | (C/A)       |
| 36097       | CadSNP11692    | <i>Desi</i>      | Ca_Desig_Scaffold04085       | 1657                           | (C/T)       |
| 36098       | CadSNP11693    | <i>Desi</i>      | Ca_Desig_Scaffold04092       | 13843                          | (A/T)       |
| 36099       | CadSNP11694    | <i>Desi</i>      | Ca_Desig_Scaffold04092       | 13846                          | (G/T)       |



| <b>S.N.</b> | <b>SNP IDs</b> | <b>Cultivars</b> | <b>Chromosomes/scaffolds</b> | <b>Physical positions (bp)</b> | <b>SNPs</b> |
|-------------|----------------|------------------|------------------------------|--------------------------------|-------------|
| 36100       | CadSNP11695    | <i>Desi</i>      | Ca_Desig_Scaffold04099       | 14764                          | (A/C)       |
| 36101       | CadSNP11696    | <i>Desi</i>      | Ca_Desig_Scaffold04114       | 835                            | (T/C)       |
| 36102       | CadSNP11697    | <i>Desi</i>      | Ca_Desig_Scaffold04125       | 2087                           | (C/G)       |
| 36103       | CadSNP11698    | <i>Desi</i>      | Ca_Desig_Scaffold04125       | 2084                           | (A/C)       |
| 36104       | CadSNP11699    | <i>Desi</i>      | Ca_Desig_Scaffold04130       | 17078                          | (T/G)       |
| 36105       | CadSNP11700    | <i>Desi</i>      | Ca_Desig_Scaffold04144       | 8514                           | (G/A)       |
| 36106       | CadSNP11701    | <i>Desi</i>      | Ca_Desig_Scaffold04160       | 15488                          | (T/C)       |
| 36107       | CadSNP11702    | <i>Desi</i>      | Ca_Desig_Scaffold04164       | 21825                          | (G/A)       |
| 36108       | CadSNP11703    | <i>Desi</i>      | Ca_Desig_Scaffold04164       | 21776                          | (G/A)       |
| 36109       | CadSNP11704    | <i>Desi</i>      | Ca_Desig_Scaffold04165       | 10047                          | (A/G)       |
| 36110       | CadSNP11705    | <i>Desi</i>      | Ca_Desig_Scaffold04171       | 4826                           | (T/C)       |
| 36111       | CadSNP11706    | <i>Desi</i>      | Ca_Desig_Scaffold04171       | 4840                           | (G/A)       |
| 36112       | CadSNP11707    | <i>Desi</i>      | Ca_Desig_Scaffold04178       | 20227                          | (T/G)       |
| 36113       | CadSNP11708    | <i>Desi</i>      | Ca_Desig_Scaffold04185       | 7264                           | (T/C)       |
| 36114       | CadSNP11709    | <i>Desi</i>      | Ca_Desig_Scaffold04185       | 7249                           | (C/T)       |
| 36115       | CadSNP11710    | <i>Desi</i>      | Ca_Desig_Scaffold04185       | 7339                           | (G/A)       |
| 36116       | CadSNP11711    | <i>Desi</i>      | Ca_Desig_Scaffold04185       | 7340                           | (T/A)       |
| 36117       | CadSNP11712    | <i>Desi</i>      | Ca_Desig_Scaffold04185       | 7369                           | (G/A)       |
| 36118       | CadSNP11713    | <i>Desi</i>      | Ca_Desig_Scaffold04185       | 7374                           | (T/G)       |
| 36119       | CadSNP11714    | <i>Desi</i>      | Ca_Desig_Scaffold04185       | 7427                           | (A/T)       |
| 36120       | CadSNP11715    | <i>Desi</i>      | Ca_Desig_Scaffold04185       | 7568                           | (C/T)       |
| 36121       | CadSNP11716    | <i>Desi</i>      | Ca_Desig_Scaffold04185       | 7596                           | (A/G)       |
| 36122       | CadSNP11717    | <i>Desi</i>      | Ca_Desig_Scaffold04187       | 7795                           | (C/T)       |
| 36123       | CadSNP11718    | <i>Desi</i>      | Ca_Desig_Scaffold04187       | 8034                           | (T/C)       |
| 36124       | CadSNP11719    | <i>Desi</i>      | Ca_Desig_Scaffold04189       | 4189                           | (C/T)       |
| 36125       | CadSNP11720    | <i>Desi</i>      | Ca_Desig_Scaffold04189       | 4186                           | (G/T)       |
| 36126       | CadSNP11721    | <i>Desi</i>      | Ca_Desig_Scaffold04195       | 3516                           | (A/G)       |
| 36127       | CadSNP11722    | <i>Desi</i>      | Ca_Desig_Scaffold04195       | 5636                           | (G/A)       |
| 36128       | CadSNP11723    | <i>Desi</i>      | Ca_Desig_Scaffold04195       | 5703                           | (T/C)       |
| 36129       | CadSNP11724    | <i>Desi</i>      | Ca_Desig_Scaffold04195       | 20832                          | (A/G)       |
| 36130       | CadSNP11725    | <i>Desi</i>      | Ca_Desig_Scaffold04196       | 27181                          | (G/A)       |
| 36131       | CadSNP11726    | <i>Desi</i>      | Ca_Desig_Scaffold04196       | 28086                          | (C/T)       |
| 36132       | CadSNP11727    | <i>Desi</i>      | Ca_Desig_Scaffold04196       | 36997                          | (A/C)       |
| 36133       | CadSNP11728    | <i>Desi</i>      | Ca_Desig_Scaffold04196       | 37051                          | (G/A)       |
| 36134       | CadSNP11729    | <i>Desi</i>      | Ca_Desig_Scaffold04196       | 49463                          | (T/G)       |
| 36135       | CadSNP11730    | <i>Desi</i>      | Ca_Desig_Scaffold04196       | 52526                          | (C/A)       |
| 36136       | CadSNP11731    | <i>Desi</i>      | Ca_Desig_Scaffold04202       | 14293                          | (C/T)       |
| 36137       | CadSNP11732    | <i>Desi</i>      | Ca_Desig_Scaffold04202       | 14298                          | (G/T)       |

| <b>S.N.</b> | <b>SNP IDs</b> | <b>Cultivars</b> | <b>Chromosomes/scaffolds</b> | <b>Physical positions (bp)</b> | <b>SNPs</b> |
|-------------|----------------|------------------|------------------------------|--------------------------------|-------------|
| 36138       | CadSNP11733    | <i>Desi</i>      | Ca_Desig_Scaffold04202       | 17468                          | (C/G)       |
| 36139       | CadSNP11734    | <i>Desi</i>      | Ca_Desig_Scaffold04217       | 11557                          | (A/G)       |
| 36140       | CadSNP11735    | <i>Desi</i>      | Ca_Desig_Scaffold04219       | 7455                           | (G/A)       |
| 36141       | CadSNP11736    | <i>Desi</i>      | Ca_Desig_Scaffold04220       | 11414                          | (A/C)       |
| 36142       | CadSNP11737    | <i>Desi</i>      | Ca_Desig_Scaffold04220       | 11423                          | (T/C)       |
| 36143       | CadSNP11738    | <i>Desi</i>      | Ca_Desig_Scaffold04220       | 11452                          | (A/G)       |
| 36144       | CadSNP11739    | <i>Desi</i>      | Ca_Desig_Scaffold04231       | 15504                          | (T/A)       |
| 36145       | CadSNP11740    | <i>Desi</i>      | Ca_Desig_Scaffold04242       | 15016                          | (A/G)       |
| 36146       | CadSNP11741    | <i>Desi</i>      | Ca_Desig_Scaffold04246       | 14006                          | (T/C)       |
| 36147       | CadSNP11742    | <i>Desi</i>      | Ca_Desig_Scaffold04257       | 11774                          | (C/T)       |
| 36148       | CadSNP11743    | <i>Desi</i>      | Ca_Desig_Scaffold04291       | 3082                           | (C/T)       |
| 36149       | CadSNP11744    | <i>Desi</i>      | Ca_Desig_Scaffold04300       | 18875                          | (T/G)       |
| 36150       | CadSNP11745    | <i>Desi</i>      | Ca_Desig_Scaffold04310       | 6990                           | (C/G)       |
| 36151       | CadSNP11746    | <i>Desi</i>      | Ca_Desig_Scaffold04316       | 10832                          | (C/T)       |
| 36152       | CadSNP11747    | <i>Desi</i>      | Ca_Desig_Scaffold04316       | 10849                          | (A/G)       |
| 36153       | CadSNP11748    | <i>Desi</i>      | Ca_Desig_Scaffold04316       | 12635                          | (C/A)       |
| 36154       | CadSNP11749    | <i>Desi</i>      | Ca_Desig_Scaffold04317       | 4357                           | (T/G)       |
| 36155       | CadSNP11750    | <i>Desi</i>      | Ca_Desig_Scaffold04317       | 4368                           | (T/A)       |
| 36156       | CadSNP11751    | <i>Desi</i>      | Ca_Desig_Scaffold04317       | 4369                           | (C/T)       |
| 36157       | CadSNP11752    | <i>Desi</i>      | Ca_Desig_Scaffold04319       | 6123                           | (A/C)       |
| 36158       | CadSNP11753    | <i>Desi</i>      | Ca_Desig_Scaffold04326       | 9382                           | (A/T)       |
| 36159       | CadSNP11754    | <i>Desi</i>      | Ca_Desig_Scaffold04326       | 9510                           | (T/A)       |
| 36160       | CadSNP11755    | <i>Desi</i>      | Ca_Desig_Scaffold04326       | 9886                           | (T/G)       |
| 36161       | CadSNP11756    | <i>Desi</i>      | Ca_Desig_Scaffold04351       | 10363                          | (G/T)       |
| 36162       | CadSNP11757    | <i>Desi</i>      | Ca_Desig_Scaffold04351       | 10365                          | (C/T)       |
| 36163       | CadSNP11758    | <i>Desi</i>      | Ca_Desig_Scaffold04351       | 10372                          | (A/G)       |
| 36164       | CadSNP11759    | <i>Desi</i>      | Ca_Desig_Scaffold04351       | 10405                          | (C/T)       |
| 36165       | CadSNP11760    | <i>Desi</i>      | Ca_Desig_Scaffold04360       | 1496                           | (G/A)       |
| 36166       | CadSNP11761    | <i>Desi</i>      | Ca_Desig_Scaffold04360       | 1575                           | (C/T)       |
| 36167       | CadSNP11762    | <i>Desi</i>      | Ca_Desig_Scaffold04379       | 8861                           | (C/A)       |
| 36168       | CadSNP11763    | <i>Desi</i>      | Ca_Desig_Scaffold04399       | 12858                          | (T/G)       |
| 36169       | CadSNP11764    | <i>Desi</i>      | Ca_Desig_Scaffold04399       | 12879                          | (C/A)       |
| 36170       | CadSNP11765    | <i>Desi</i>      | Ca_Desig_Scaffold04399       | 13046                          | (C/T)       |
| 36171       | CadSNP11766    | <i>Desi</i>      | Ca_Desig_Scaffold04410       | 9235                           | (T/G)       |
| 36172       | CadSNP11767    | <i>Desi</i>      | Ca_Desig_Scaffold04410       | 9221                           | (T/C)       |
| 36173       | CadSNP11768    | <i>Desi</i>      | Ca_Desig_Scaffold04418       | 15735                          | (C/T)       |
| 36174       | CadSNP11769    | <i>Desi</i>      | Ca_Desig_Scaffold04418       | 15807                          | (A/T)       |
| 36175       | CadSNP11770    | <i>Desi</i>      | Ca_Desig_Scaffold04423       | 8958                           | (T/A)       |

| <b>S.N.</b> | <b>SNP IDs</b> | <b>Cultivars</b> | <b>Chromosomes/scaffolds</b> | <b>Physical positions (bp)</b> | <b>SNPs</b> |
|-------------|----------------|------------------|------------------------------|--------------------------------|-------------|
| 36176       | CadSNP11771    | <i>Desi</i>      | Ca_Desig_Scaffold04423       | 11480                          | (T/C)       |
| 36177       | CadSNP11772    | <i>Desi</i>      | Ca_Desig_Scaffold04423       | 12420                          | (A/G)       |
| 36178       | CadSNP11773    | <i>Desi</i>      | Ca_Desig_Scaffold04423       | 12414                          | (T/G)       |
| 36179       | CadSNP11774    | <i>Desi</i>      | Ca_Desig_Scaffold04423       | 12406                          | (C/T)       |
| 36180       | CadSNP11775    | <i>Desi</i>      | Ca_Desig_Scaffold04437       | 15934                          | (A/C)       |
| 36181       | CadSNP11776    | <i>Desi</i>      | Ca_Desig_Scaffold04437       | 15948                          | (A/C)       |
| 36182       | CadSNP11777    | <i>Desi</i>      | Ca_Desig_Scaffold04437       | 15963                          | (A/C)       |
| 36183       | CadSNP11778    | <i>Desi</i>      | Ca_Desig_Scaffold04437       | 15967                          | (C/T)       |
| 36184       | CadSNP11779    | <i>Desi</i>      | Ca_Desig_Scaffold04437       | 15976                          | (T/C)       |
| 36185       | CadSNP11780    | <i>Desi</i>      | Ca_Desig_Scaffold04437       | 15983                          | (A/C)       |
| 36186       | CadSNP11781    | <i>Desi</i>      | Ca_Desig_Scaffold04437       | 15991                          | (A/G)       |
| 36187       | CadSNP11782    | <i>Desi</i>      | Ca_Desig_Scaffold04437       | 15993                          | (T/C)       |
| 36188       | CadSNP11783    | <i>Desi</i>      | Ca_Desig_Scaffold04437       | 15997                          | (T/C)       |
| 36189       | CadSNP11784    | <i>Desi</i>      | Ca_Desig_Scaffold04437       | 16022                          | (T/C)       |
| 36190       | CadSNP11785    | <i>Desi</i>      | Ca_Desig_Scaffold04437       | 15982                          | (A/G)       |
| 36191       | CadSNP11786    | <i>Desi</i>      | Ca_Desig_Scaffold04437       | 15942                          | (C/T)       |
| 36192       | CadSNP11787    | <i>Desi</i>      | Ca_Desig_Scaffold04442       | 69                             | (T/C)       |
| 36193       | CadSNP11788    | <i>Desi</i>      | Ca_Desig_Scaffold04442       | 100                            | (C/A)       |
| 36194       | CadSNP11789    | <i>Desi</i>      | Ca_Desig_Scaffold04448       | 6256                           | (A/G)       |
| 36195       | CadSNP11790    | <i>Desi</i>      | Ca_Desig_Scaffold04448       | 15163                          | (G/A)       |
| 36196       | CadSNP11791    | <i>Desi</i>      | Ca_Desig_Scaffold04448       | 15603                          | (C/T)       |
| 36197       | CadSNP11792    | <i>Desi</i>      | Ca_Desig_Scaffold04449       | 1569                           | (C/A)       |
| 36198       | CadSNP11793    | <i>Desi</i>      | Ca_Desig_Scaffold04453       | 161725                         | (C/A)       |
| 36199       | CadSNP11794    | <i>Desi</i>      | Ca_Desig_Scaffold04453       | 196940                         | (T/G)       |
| 36200       | CadSNP11795    | <i>Desi</i>      | Ca_Desig_Scaffold04453       | 196914                         | (G/T)       |
| 36201       | CadSNP11796    | <i>Desi</i>      | Ca_Desig_Scaffold04454       | 4593                           | (C/G)       |
| 36202       | CadSNP11797    | <i>Desi</i>      | Ca_Desig_Scaffold04454       | 6906                           | (T/G)       |
| 36203       | CadSNP11798    | <i>Desi</i>      | Ca_Desig_Scaffold04457       | 19027                          | (A/C)       |
| 36204       | CadSNP11799    | <i>Desi</i>      | Ca_Desig_Scaffold04460       | 11579                          | (A/C)       |
| 36205       | CadSNP11800    | <i>Desi</i>      | Ca_Desig_Scaffold04460       | 11684                          | (C/T)       |
| 36206       | CadSNP11801    | <i>Desi</i>      | Ca_Desig_Scaffold04463       | 925                            | (C/T)       |
| 36207       | CadSNP11802    | <i>Desi</i>      | Ca_Desig_Scaffold04472       | 14688                          | (G/A)       |
| 36208       | CadSNP11803    | <i>Desi</i>      | Ca_Desig_Scaffold04472       | 14958                          | (A/C)       |
| 36209       | CadSNP11804    | <i>Desi</i>      | Ca_Desig_Scaffold04492       | 9997                           | (A/G)       |
| 36210       | CadSNP11805    | <i>Desi</i>      | Ca_Desig_Scaffold04529       | 1730                           | (T/C)       |
| 36211       | CadSNP11806    | <i>Desi</i>      | Ca_Desig_Scaffold04543       | 6900                           | (A/C)       |
| 36212       | CadSNP11807    | <i>Desi</i>      | Ca_Desig_Scaffold04543       | 6965                           | (T/C)       |
| 36213       | CadSNP11808    | <i>Desi</i>      | Ca_Desig_Scaffold04543       | 6933                           | (A/G)       |

| <b>S.N.</b> | <b>SNP IDs</b> | <b>Cultivars</b> | <b>Chromosomes/scaffolds</b> | <b>Physical positions (bp)</b> | <b>SNPs</b> |
|-------------|----------------|------------------|------------------------------|--------------------------------|-------------|
| 36214       | CadSNP11809    | <i>Desi</i>      | Ca_Desig_Scaffold04564       | 10890                          | (C/T)       |
| 36215       | CadSNP11810    | <i>Desi</i>      | Ca_Desig_Scaffold04570       | 6408                           | (G/A)       |
| 36216       | CadSNP11811    | <i>Desi</i>      | Ca_Desig_Scaffold04570       | 6526                           | (T/A)       |
| 36217       | CadSNP11812    | <i>Desi</i>      | Ca_Desig_Scaffold04570       | 6519                           | (T/C)       |
| 36218       | CadSNP11813    | <i>Desi</i>      | Ca_Desig_Scaffold04570       | 6504                           | (A/G)       |
| 36219       | CadSNP11814    | <i>Desi</i>      | Ca_Desig_Scaffold04570       | 6458                           | (T/A)       |
| 36220       | CadSNP11815    | <i>Desi</i>      | Ca_Desig_Scaffold04574       | 124                            | (A/G)       |
| 36221       | CadSNP11816    | <i>Desi</i>      | Ca_Desig_Scaffold04574       | 199                            | (T/A)       |
| 36222       | CadSNP11817    | <i>Desi</i>      | Ca_Desig_Scaffold04574       | 193                            | (C/T)       |
| 36223       | CadSNP11818    | <i>Desi</i>      | Ca_Desig_Scaffold04574       | 164                            | (G/T)       |
| 36224       | CadSNP11819    | <i>Desi</i>      | Ca_Desig_Scaffold04574       | 161                            | (C/A)       |
| 36225       | CadSNP11820    | <i>Desi</i>      | Ca_Desig_Scaffold04574       | 138                            | (G/A)       |
| 36226       | CadSNP11821    | <i>Desi</i>      | Ca_Desig_Scaffold04574       | 218                            | (A/G)       |
| 36227       | CadSNP11822    | <i>Desi</i>      | Ca_Desig_Scaffold04579       | 1602                           | (T/C)       |
| 36228       | CadSNP11823    | <i>Desi</i>      | Ca_Desig_Scaffold04579       | 1758                           | (C/A)       |
| 36229       | CadSNP11824    | <i>Desi</i>      | Ca_Desig_Scaffold04579       | 1718                           | (T/G)       |
| 36230       | CadSNP11825    | <i>Desi</i>      | Ca_Desig_Scaffold04579       | 17937                          | (G/C)       |
| 36231       | CadSNP11826    | <i>Desi</i>      | Ca_Desig_Scaffold04579       | 17946                          | (C/A)       |
| 36232       | CadSNP11827    | <i>Desi</i>      | Ca_Desig_Scaffold04579       | 17956                          | (G/A)       |
| 36233       | CadSNP11828    | <i>Desi</i>      | Ca_Desig_Scaffold04579       | 18040                          | (A/G)       |
| 36234       | CadSNP11829    | <i>Desi</i>      | Ca_Desig_Scaffold04579       | 18026                          | (A/G)       |
| 36235       | CadSNP11830    | <i>Desi</i>      | Ca_Desig_Scaffold04579       | 18017                          | (C/G)       |
| 36236       | CadSNP11831    | <i>Desi</i>      | Ca_Desig_Scaffold04579       | 17997                          | (G/A)       |
| 36237       | CadSNP11832    | <i>Desi</i>      | Ca_Desig_Scaffold04579       | 17990                          | (G/T)       |
| 36238       | CadSNP11833    | <i>Desi</i>      | Ca_Desig_Scaffold04579       | 17982                          | (C/T)       |
| 36239       | CadSNP11834    | <i>Desi</i>      | Ca_Desig_Scaffold04579       | 17980                          | (T/G)       |
| 36240       | CadSNP11835    | <i>Desi</i>      | Ca_Desig_Scaffold04580       | 13601                          | (G/C)       |
| 36241       | CadSNP11836    | <i>Desi</i>      | Ca_Desig_Scaffold04580       | 13666                          | (T/C)       |
| 36242       | CadSNP11837    | <i>Desi</i>      | Ca_Desig_Scaffold04581       | 9159                           | (G/A)       |
| 36243       | CadSNP11838    | <i>Desi</i>      | Ca_Desig_Scaffold04591       | 9222                           | (G/A)       |
| 36244       | CadSNP11839    | <i>Desi</i>      | Ca_Desig_Scaffold04591       | 9249                           | (G/A)       |
| 36245       | CadSNP11840    | <i>Desi</i>      | Ca_Desig_Scaffold04591       | 11873                          | (T/G)       |
| 36246       | CadSNP11841    | <i>Desi</i>      | Ca_Desig_Scaffold04591       | 11921                          | (G/T)       |
| 36247       | CadSNP11842    | <i>Desi</i>      | Ca_Desig_Scaffold04591       | 11922                          | (C/T)       |
| 36248       | CadSNP11843    | <i>Desi</i>      | Ca_Desig_Scaffold04591       | 11927                          | (A/G)       |
| 36249       | CadSNP11844    | <i>Desi</i>      | Ca_Desig_Scaffold04591       | 11931                          | (C/T)       |
| 36250       | CadSNP11845    | <i>Desi</i>      | Ca_Desig_Scaffold04593       | 15945                          | (G/T)       |
| 36251       | CadSNP11846    | <i>Desi</i>      | Ca_Desig_Scaffold04593       | 16028                          | (T/C)       |

| <b>S.N.</b> | <b>SNP IDs</b> | <b>Cultivars</b> | <b>Chromosomes/scaffolds</b> | <b>Physical positions (bp)</b> | <b>SNPs</b> |
|-------------|----------------|------------------|------------------------------|--------------------------------|-------------|
| 36252       | CadSNP11847    | <i>Desi</i>      | Ca_Desig_Scaffold04593       | 15999                          | (A/C)       |
| 36253       | CadSNP11848    | <i>Desi</i>      | Ca_Desig_Scaffold04599       | 12433                          | (A/G)       |
| 36254       | CadSNP11849    | <i>Desi</i>      | Ca_Desig_Scaffold04628       | 15129                          | (C/A)       |
| 36255       | CadSNP11850    | <i>Desi</i>      | Ca_Desig_Scaffold04665       | 1143                           | (T/C)       |
| 36256       | CadSNP11851    | <i>Desi</i>      | Ca_Desig_Scaffold04665       | 1162                           | (A/T)       |
| 36257       | CadSNP11852    | <i>Desi</i>      | Ca_Desig_Scaffold04665       | 1167                           | (C/T)       |
| 36258       | CadSNP11853    | <i>Desi</i>      | Ca_Desig_Scaffold04666       | 3152                           | (T/G)       |
| 36259       | CadSNP11854    | <i>Desi</i>      | Ca_Desig_Scaffold04666       | 3148                           | (G/A)       |
| 36260       | CadSNP11855    | <i>Desi</i>      | Ca_Desig_Scaffold04666       | 3122                           | (T/C)       |
| 36261       | CadSNP11856    | <i>Desi</i>      | Ca_Desig_Scaffold04666       | 3146                           | (T/G)       |
| 36262       | CadSNP11857    | <i>Desi</i>      | Ca_Desig_Scaffold04706       | 12940                          | (G/C)       |
| 36263       | CadSNP11858    | <i>Desi</i>      | Ca_Desig_Scaffold04707       | 6130                           | (A/G)       |
| 36264       | CadSNP11859    | <i>Desi</i>      | Ca_Desig_Scaffold04721       | 9541                           | (C/A)       |
| 36265       | CadSNP11860    | <i>Desi</i>      | Ca_Desig_Scaffold04732       | 2312                           | (T/A)       |
| 36266       | CadSNP11861    | <i>Desi</i>      | Ca_Desig_Scaffold04732       | 2301                           | (A/G)       |
| 36267       | CadSNP11862    | <i>Desi</i>      | Ca_Desig_Scaffold04732       | 2286                           | (C/A)       |
| 36268       | CadSNP11863    | <i>Desi</i>      | Ca_Desig_Scaffold04732       | 2819                           | (T/C)       |
| 36269       | CadSNP11864    | <i>Desi</i>      | Ca_Desig_Scaffold04732       | 9866                           | (A/C)       |
| 36270       | CadSNP11865    | <i>Desi</i>      | Ca_Desig_Scaffold04732       | 9847                           | (T/C)       |
| 36271       | CadSNP11866    | <i>Desi</i>      | Ca_Desig_Scaffold04733       | 57                             | (G/T)       |
| 36272       | CadSNP11867    | <i>Desi</i>      | Ca_Desig_Scaffold04733       | 79                             | (C/G)       |
| 36273       | CadSNP11868    | <i>Desi</i>      | Ca_Desig_Scaffold04733       | 88                             | (T/A)       |
| 36274       | CadSNP11869    | <i>Desi</i>      | Ca_Desig_Scaffold04751       | 13587                          | (A/G)       |
| 36275       | CadSNP11870    | <i>Desi</i>      | Ca_Desig_Scaffold04772       | 9589                           | (A/C)       |
| 36276       | CadSNP11871    | <i>Desi</i>      | Ca_Desig_Scaffold04772       | 10186                          | (A/C)       |
| 36277       | CadSNP11872    | <i>Desi</i>      | Ca_Desig_Scaffold04772       | 10182                          | (C/A)       |
| 36278       | CadSNP11873    | <i>Desi</i>      | Ca_Desig_Scaffold04784       | 7724                           | (G/A)       |
| 36279       | CadSNP11874    | <i>Desi</i>      | Ca_Desig_Scaffold04787       | 3410                           | (C/A)       |
| 36280       | CadSNP11875    | <i>Desi</i>      | Ca_Desig_Scaffold04794       | 3736                           | (C/A)       |
| 36281       | CadSNP11876    | <i>Desi</i>      | Ca_Desig_Scaffold04794       | 3973                           | (C/A)       |
| 36282       | CadSNP11877    | <i>Desi</i>      | Ca_Desig_Scaffold04796       | 5442                           | (A/C)       |
| 36283       | CadSNP11878    | <i>Desi</i>      | Ca_Desig_Scaffold04814       | 9058                           | (T/C)       |
| 36284       | CadSNP11879    | <i>Desi</i>      | Ca_Desig_Scaffold04814       | 9065                           | (C/G)       |
| 36285       | CadSNP11880    | <i>Desi</i>      | Ca_Desig_Scaffold04814       | 9106                           | (T/C)       |
| 36286       | CadSNP11881    | <i>Desi</i>      | Ca_Desig_Scaffold04814       | 9200                           | (G/A)       |
| 36287       | CadSNP11882    | <i>Desi</i>      | Ca_Desig_Scaffold04814       | 9172                           | (G/C)       |
| 36288       | CadSNP11883    | <i>Desi</i>      | Ca_Desig_Scaffold04832       | 4371                           | (C/T)       |
| 36289       | CadSNP11884    | <i>Desi</i>      | Ca_Desig_Scaffold04832       | 10214                          | (C/T)       |

| <b>S.N.</b> | <b>SNP IDs</b> | <b>Cultivars</b> | <b>Chromosomes/scaffolds</b> | <b>Physical positions (bp)</b> | <b>SNPs</b> |
|-------------|----------------|------------------|------------------------------|--------------------------------|-------------|
| 36290       | CadSNP11885    | <i>Desi</i>      | Ca_Desig_Scaffold04832       | 10223                          | (T/C)       |
| 36291       | CadSNP11886    | <i>Desi</i>      | Ca_Desig_Scaffold04832       | 10249                          | (A/C)       |
| 36292       | CadSNP11887    | <i>Desi</i>      | Ca_Desig_Scaffold04832       | 10302                          | (G/A)       |
| 36293       | CadSNP11888    | <i>Desi</i>      | Ca_Desig_Scaffold04832       | 10267                          | (C/T)       |
| 36294       | CadSNP11889    | <i>Desi</i>      | Ca_Desig_Scaffold04832       | 10609                          | (C/T)       |
| 36295       | CadSNP11890    | <i>Desi</i>      | Ca_Desig_Scaffold04832       | 10608                          | (C/A)       |
| 36296       | CadSNP11891    | <i>Desi</i>      | Ca_Desig_Scaffold04832       | 10601                          | (C/T)       |
| 36297       | CadSNP11892    | <i>Desi</i>      | Ca_Desig_Scaffold04832       | 10597                          | (C/A)       |
| 36298       | CadSNP11893    | <i>Desi</i>      | Ca_Desig_Scaffold04832       | 10585                          | (C/T)       |
| 36299       | CadSNP11894    | <i>Desi</i>      | Ca_Desig_Scaffold04832       | 10546                          | (A/C)       |
| 36300       | CadSNP11895    | <i>Desi</i>      | Ca_Desig_Scaffold04832       | 10669                          | (C/G)       |
| 36301       | CadSNP11896    | <i>Desi</i>      | Ca_Desig_Scaffold04832       | 10812                          | (C/A)       |
| 36302       | CadSNP11897    | <i>Desi</i>      | Ca_Desig_Scaffold04832       | 12896                          | (A/G)       |
| 36303       | CadSNP11898    | <i>Desi</i>      | Ca_Desig_Scaffold04832       | 12929                          | (C/G)       |
| 36304       | CadSNP11899    | <i>Desi</i>      | Ca_Desig_Scaffold04832       | 12932                          | (C/A)       |
| 36305       | CadSNP11900    | <i>Desi</i>      | Ca_Desig_Scaffold04832       | 13022                          | (T/G)       |
| 36306       | CadSNP11901    | <i>Desi</i>      | Ca_Desig_Scaffold04832       | 13010                          | (C/T)       |
| 36307       | CadSNP11902    | <i>Desi</i>      | Ca_Desig_Scaffold04832       | 13004                          | (C/T)       |
| 36308       | CadSNP11903    | <i>Desi</i>      | Ca_Desig_Scaffold04832       | 12997                          | (G/T)       |
| 36309       | CadSNP11904    | <i>Desi</i>      | Ca_Desig_Scaffold04832       | 12996                          | (C/T)       |
| 36310       | CadSNP11905    | <i>Desi</i>      | Ca_Desig_Scaffold04832       | 12989                          | (A/G)       |
| 36311       | CadSNP11906    | <i>Desi</i>      | Ca_Desig_Scaffold04832       | 12986                          | (G/A)       |
| 36312       | CadSNP11907    | <i>Desi</i>      | Ca_Desig_Scaffold04832       | 12979                          | (C/T)       |
| 36313       | CadSNP11908    | <i>Desi</i>      | Ca_Desig_Scaffold04832       | 12950                          | (A/G)       |
| 36314       | CadSNP11909    | <i>Desi</i>      | Ca_Desig_Scaffold04833       | 3636                           | (G/A)       |
| 36315       | CadSNP11910    | <i>Desi</i>      | Ca_Desig_Scaffold04856       | 15567                          | (C/T)       |
| 36316       | CadSNP11911    | <i>Desi</i>      | Ca_Desig_Scaffold04856       | 15572                          | (C/T)       |
| 36317       | CadSNP11912    | <i>Desi</i>      | Ca_Desig_Scaffold04862       | 10470                          | (T/G)       |
| 36318       | CadSNP11913    | <i>Desi</i>      | Ca_Desig_Scaffold04888       | 10480                          | (G/A)       |
| 36319       | CadSNP11914    | <i>Desi</i>      | Ca_Desig_Scaffold04888       | 10548                          | (C/T)       |
| 36320       | CadSNP11915    | <i>Desi</i>      | Ca_Desig_Scaffold04888       | 12127                          | (A/T)       |
| 36321       | CadSNP11916    | <i>Desi</i>      | Ca_Desig_Scaffold04888       | 12131                          | (T/C)       |
| 36322       | CadSNP11917    | <i>Desi</i>      | Ca_Desig_Scaffold04888       | 12334                          | (A/G)       |
| 36323       | CadSNP11918    | <i>Desi</i>      | Ca_Desig_Scaffold04888       | 12392                          | (A/G)       |
| 36324       | CadSNP11919    | <i>Desi</i>      | Ca_Desig_Scaffold04888       | 12384                          | (T/A)       |
| 36325       | CadSNP11920    | <i>Desi</i>      | Ca_Desig_Scaffold04888       | 12343                          | (C/A)       |
| 36326       | CadSNP11921    | <i>Desi</i>      | Ca_Desig_Scaffold04897       | 6841                           | (G/C)       |
| 36327       | CadSNP11922    | <i>Desi</i>      | Ca_Desig_Scaffold04897       | 6806                           | (T/C)       |

| <b>S.N.</b> | <b>SNP IDs</b> | <b>Cultivars</b> | <b>Chromosomes/scaffolds</b> | <b>Physical positions (bp)</b> | <b>SNPs</b> |
|-------------|----------------|------------------|------------------------------|--------------------------------|-------------|
| 36328       | CadSNP11923    | <i>Desi</i>      | Ca_Desig_Scaffold04899       | 1732                           | (G/T)       |
| 36329       | CadSNP11924    | <i>Desi</i>      | Ca_Desig_Scaffold04899       | 1727                           | (G/C)       |
| 36330       | CadSNP11925    | <i>Desi</i>      | Ca_Desig_Scaffold04899       | 1721                           | (C/T)       |
| 36331       | CadSNP11926    | <i>Desi</i>      | Ca_Desig_Scaffold04899       | 1699                           | (A/G)       |
| 36332       | CadSNP11927    | <i>Desi</i>      | Ca_Desig_Scaffold04899       | 1696                           | (A/C)       |
| 36333       | CadSNP11928    | <i>Desi</i>      | Ca_Desig_Scaffold04899       | 1829                           | (A/T)       |
| 36334       | CadSNP11929    | <i>Desi</i>      | Ca_Desig_Scaffold04899       | 1851                           | (T/C)       |
| 36335       | CadSNP11930    | <i>Desi</i>      | Ca_Desig_Scaffold04899       | 1933                           | (A/G)       |
| 36336       | CadSNP11931    | <i>Desi</i>      | Ca_Desig_Scaffold04912       | 2389                           | (T/A)       |
| 36337       | CadSNP11932    | <i>Desi</i>      | Ca_Desig_Scaffold04916       | 197                            | (T/C)       |
| 36338       | CadSNP11933    | <i>Desi</i>      | Ca_Desig_Scaffold04929       | 5144                           | (C/A)       |
| 36339       | CadSNP11934    | <i>Desi</i>      | Ca_Desig_Scaffold04929       | 5155                           | (G/T)       |
| 36340       | CadSNP11935    | <i>Desi</i>      | Ca_Desig_Scaffold04929       | 5163                           | (G/T)       |
| 36341       | CadSNP11936    | <i>Desi</i>      | Ca_Desig_Scaffold04929       | 5170                           | (T/G)       |
| 36342       | CadSNP11937    | <i>Desi</i>      | Ca_Desig_Scaffold04929       | 5198                           | (T/C)       |
| 36343       | CadSNP11938    | <i>Desi</i>      | Ca_Desig_Scaffold04929       | 5256                           | (G/A)       |
| 36344       | CadSNP11939    | <i>Desi</i>      | Ca_Desig_Scaffold04929       | 5253                           | (G/A)       |
| 36345       | CadSNP11940    | <i>Desi</i>      | Ca_Desig_Scaffold04929       | 5244                           | (G/T)       |
| 36346       | CadSNP11941    | <i>Desi</i>      | Ca_Desig_Scaffold04929       | 5239                           | (T/A)       |
| 36347       | CadSNP11942    | <i>Desi</i>      | Ca_Desig_Scaffold04929       | 5238                           | (G/C)       |
| 36348       | CadSNP11943    | <i>Desi</i>      | Ca_Desig_Scaffold04929       | 5232                           | (C/A)       |
| 36349       | CadSNP11944    | <i>Desi</i>      | Ca_Desig_Scaffold04929       | 5230                           | (T/C)       |
| 36350       | CadSNP11945    | <i>Desi</i>      | Ca_Desig_Scaffold04929       | 5229                           | (T/C)       |
| 36351       | CadSNP11946    | <i>Desi</i>      | Ca_Desig_Scaffold04929       | 5224                           | (G/A)       |
| 36352       | CadSNP11947    | <i>Desi</i>      | Ca_Desig_Scaffold04929       | 5208                           | (A/G)       |
| 36353       | CadSNP11948    | <i>Desi</i>      | Ca_Desig_Scaffold04929       | 5204                           | (T/G)       |
| 36354       | CadSNP11949    | <i>Desi</i>      | Ca_Desig_Scaffold04929       | 5200                           | (T/C)       |
| 36355       | CadSNP11950    | <i>Desi</i>      | Ca_Desig_Scaffold04929       | 5180                           | (C/A)       |
| 36356       | CadSNP11951    | <i>Desi</i>      | Ca_Desig_Scaffold04929       | 9338                           | (G/C)       |
| 36357       | CadSNP11952    | <i>Desi</i>      | Ca_Desig_Scaffold04929       | 9343                           | (T/G)       |
| 36358       | CadSNP11953    | <i>Desi</i>      | Ca_Desig_Scaffold04929       | 9345                           | (T/C)       |
| 36359       | CadSNP11954    | <i>Desi</i>      | Ca_Desig_Scaffold04929       | 9347                           | (A/G)       |
| 36360       | CadSNP11955    | <i>Desi</i>      | Ca_Desig_Scaffold04929       | 9353                           | (A/G)       |
| 36361       | CadSNP11956    | <i>Desi</i>      | Ca_Desig_Scaffold04929       | 9355                           | (T/G)       |
| 36362       | CadSNP11957    | <i>Desi</i>      | Ca_Desig_Scaffold04929       | 9357                           | (T/C)       |
| 36363       | CadSNP11958    | <i>Desi</i>      | Ca_Desig_Scaffold04929       | 9359                           | (G/A)       |
| 36364       | CadSNP11959    | <i>Desi</i>      | Ca_Desig_Scaffold04929       | 9401                           | (G/A)       |
| 36365       | CadSNP11960    | <i>Desi</i>      | Ca_Desig_Scaffold04929       | 9518                           | (C/G)       |

| <b>S.N.</b> | <b>SNP IDs</b> | <b>Cultivars</b> | <b>Chromosomes/scaffolds</b> | <b>Physical positions (bp)</b> | <b>SNPs</b> |
|-------------|----------------|------------------|------------------------------|--------------------------------|-------------|
| 36366       | CadSNP11961    | <i>Desi</i>      | Ca_Desig_Scaffold04929       | 9513                           | (A/G)       |
| 36367       | CadSNP11962    | <i>Desi</i>      | Ca_Desig_Scaffold04929       | 9509                           | (G/A)       |
| 36368       | CadSNP11963    | <i>Desi</i>      | Ca_Desig_Scaffold04929       | 9502                           | (A/T)       |
| 36369       | CadSNP11964    | <i>Desi</i>      | Ca_Desig_Scaffold04929       | 9501                           | (T/G)       |
| 36370       | CadSNP11965    | <i>Desi</i>      | Ca_Desig_Scaffold04929       | 9622                           | (A/T)       |
| 36371       | CadSNP11966    | <i>Desi</i>      | Ca_Desig_Scaffold04929       | 9590                           | (A/G)       |
| 36372       | CadSNP11967    | <i>Desi</i>      | Ca_Desig_Scaffold04929       | 9587                           | (A/C)       |
| 36373       | CadSNP11968    | <i>Desi</i>      | Ca_Desig_Scaffold04938       | 9031                           | (G/A)       |
| 36374       | CadSNP11969    | <i>Desi</i>      | Ca_Desig_Scaffold04938       | 9057                           | (T/C)       |
| 36375       | CadSNP11970    | <i>Desi</i>      | Ca_Desig_Scaffold04938       | 9075                           | (T/G)       |
| 36376       | CadSNP11971    | <i>Desi</i>      | Ca_Desig_Scaffold04949       | 5389                           | (C/G)       |
| 36377       | CadSNP11972    | <i>Desi</i>      | Ca_Desig_Scaffold04950       | 14770                          | (G/T)       |
| 36378       | CadSNP11973    | <i>Desi</i>      | Ca_Desig_Scaffold04951       | 9271                           | (G/A)       |
| 36379       | CadSNP11974    | <i>Desi</i>      | Ca_Desig_Scaffold04951       | 9323                           | (A/T)       |
| 36380       | CadSNP11975    | <i>Desi</i>      | Ca_Desig_Scaffold04951       | 9324                           | (T/A)       |
| 36381       | CadSNP11976    | <i>Desi</i>      | Ca_Desig_Scaffold04951       | 9367                           | (T/G)       |
| 36382       | CadSNP11977    | <i>Desi</i>      | Ca_Desig_Scaffold04952       | 470                            | (G/A)       |
| 36383       | CadSNP11978    | <i>Desi</i>      | Ca_Desig_Scaffold04953       | 14379                          | (G/A)       |
| 36384       | CadSNP11979    | <i>Desi</i>      | Ca_Desig_Scaffold04953       | 14408                          | (A/T)       |
| 36385       | CadSNP11980    | <i>Desi</i>      | Ca_Desig_Scaffold04953       | 14442                          | (C/T)       |
| 36386       | CadSNP11981    | <i>Desi</i>      | Ca_Desig_Scaffold04953       | 14454                          | (C/A)       |
| 36387       | CadSNP11982    | <i>Desi</i>      | Ca_Desig_Scaffold04962       | 9128                           | (T/A)       |
| 36388       | CadSNP11983    | <i>Desi</i>      | Ca_Desig_Scaffold04962       | 9180                           | (A/G)       |
| 36389       | CadSNP11984    | <i>Desi</i>      | Ca_Desig_Scaffold04962       | 9183                           | (A/G)       |
| 36390       | CadSNP11985    | <i>Desi</i>      | Ca_Desig_Scaffold04962       | 9287                           | (T/C)       |
| 36391       | CadSNP11986    | <i>Desi</i>      | Ca_Desig_Scaffold04962       | 9261                           | (G/A)       |
| 36392       | CadSNP11987    | <i>Desi</i>      | Ca_Desig_Scaffold04984       | 11135                          | (C/T)       |
| 36393       | CadSNP11988    | <i>Desi</i>      | Ca_Desig_Scaffold04984       | 11119                          | (T/C)       |
| 36394       | CadSNP11989    | <i>Desi</i>      | Ca_Desig_Scaffold04984       | 11081                          | (G/A)       |
| 36395       | CadSNP11990    | <i>Desi</i>      | Ca_Desig_Scaffold04991       | 5949                           | (T/C)       |
| 36396       | CadSNP11991    | <i>Desi</i>      | Ca_Desig_Scaffold05002       | 12921                          | (C/T)       |
| 36397       | CadSNP11992    | <i>Desi</i>      | Ca_Desig_Scaffold05002       | 12956                          | (A/G)       |
| 36398       | CadSNP11993    | <i>Desi</i>      | Ca_Desig_Scaffold05014       | 3365                           | (T/A)       |
| 36399       | CadSNP11994    | <i>Desi</i>      | Ca_Desig_Scaffold05014       | 3374                           | (A/G)       |
| 36400       | CadSNP11995    | <i>Desi</i>      | Ca_Desig_Scaffold05016       | 1942                           | (A/G)       |
| 36401       | CadSNP11996    | <i>Desi</i>      | Ca_Desig_Scaffold05016       | 1977                           | (A/C)       |
| 36402       | CadSNP11997    | <i>Desi</i>      | Ca_Desig_Scaffold05016       | 1978                           | (C/T)       |
| 36403       | CadSNP11998    | <i>Desi</i>      | Ca_Desig_Scaffold05016       | 1979                           | (C/T)       |



| <b>S.N.</b> | <b>SNP IDs</b> | <b>Cultivars</b> | <b>Chromosomes/scaffolds</b> | <b>Physical positions (bp)</b> | <b>SNPs</b> |
|-------------|----------------|------------------|------------------------------|--------------------------------|-------------|
| 36404       | CadSNP11999    | <i>Desi</i>      | Ca_Desig_Scaffold05016       | 1998                           | (G/A)       |
| 36405       | CadSNP12000    | <i>Desi</i>      | Ca_Desig_Scaffold05016       | 2006                           | (G/A)       |
| 36406       | CadSNP12001    | <i>Desi</i>      | Ca_Desig_Scaffold05017       | 2128                           | (A/G)       |
| 36407       | CadSNP12002    | <i>Desi</i>      | Ca_Desig_Scaffold05017       | 2159                           | (T/C)       |
| 36408       | CadSNP12003    | <i>Desi</i>      | Ca_Desig_Scaffold05027       | 2883                           | (A/T)       |
| 36409       | CadSNP12004    | <i>Desi</i>      | Ca_Desig_Scaffold05034       | 12762                          | (T/C)       |
| 36410       | CadSNP12005    | <i>Desi</i>      | Ca_Desig_Scaffold05034       | 12761                          | (G/C)       |
| 36411       | CadSNP12006    | <i>Desi</i>      | Ca_Desig_Scaffold05034       | 12749                          | (C/G)       |
| 36412       | CadSNP12007    | <i>Desi</i>      | Ca_Desig_Scaffold05059       | 8450                           | (G/T)       |
| 36413       | CadSNP12008    | <i>Desi</i>      | Ca_Desig_Scaffold05064       | 838                            | (A/G)       |
| 36414       | CadSNP12009    | <i>Desi</i>      | Ca_Desig_Scaffold05064       | 2510                           | (C/T)       |
| 36415       | CadSNP12010    | <i>Desi</i>      | Ca_Desig_Scaffold05070       | 4860                           | (C/T)       |
| 36416       | CadSNP12011    | <i>Desi</i>      | Ca_Desig_Scaffold05070       | 4931                           | (A/G)       |
| 36417       | CadSNP12012    | <i>Desi</i>      | Ca_Desig_Scaffold05072       | 14453                          | (T/A)       |
| 36418       | CadSNP12013    | <i>Desi</i>      | Ca_Desig_Scaffold05072       | 14456                          | (G/T)       |
| 36419       | CadSNP12014    | <i>Desi</i>      | Ca_Desig_Scaffold05077       | 8081                           | (T/C)       |
| 36420       | CadSNP12015    | <i>Desi</i>      | Ca_Desig_Scaffold05079       | 2462                           | (T/C)       |
| 36421       | CadSNP12016    | <i>Desi</i>      | Ca_Desig_Scaffold05105       | 40561                          | (T/C)       |
| 36422       | CadSNP12017    | <i>Desi</i>      | Ca_Desig_Scaffold05105       | 40628                          | (C/T)       |
| 36423       | CadSNP12018    | <i>Desi</i>      | Ca_Desig_Scaffold05105       | 57060                          | (A/C)       |
| 36424       | CadSNP12019    | <i>Desi</i>      | Ca_Desig_Scaffold05105       | 237039                         | (G/T)       |
| 36425       | CadSNP12020    | <i>Desi</i>      | Ca_Desig_Scaffold05134       | 2955                           | (G/A)       |
| 36426       | CadSNP12021    | <i>Desi</i>      | Ca_Desig_Scaffold05134       | 3014                           | (T/G)       |
| 36427       | CadSNP12022    | <i>Desi</i>      | Ca_Desig_Scaffold05156       | 5156                           | (A/C)       |
| 36428       | CadSNP12023    | <i>Desi</i>      | Ca_Desig_Scaffold05156       | 5152                           | (T/G)       |
| 36429       | CadSNP12024    | <i>Desi</i>      | Ca_Desig_Scaffold05156       | 5243                           | (A/C)       |
| 36430       | CadSNP12025    | <i>Desi</i>      | Ca_Desig_Scaffold05161       | 6283                           | (T/G)       |
| 36431       | CadSNP12026    | <i>Desi</i>      | Ca_Desig_Scaffold05161       | 6382                           | (A/G)       |
| 36432       | CadSNP12027    | <i>Desi</i>      | Ca_Desig_Scaffold05163       | 11307                          | (A/G)       |
| 36433       | CadSNP12028    | <i>Desi</i>      | Ca_Desig_Scaffold05163       | 12258                          | (T/C)       |
| 36434       | CadSNP12029    | <i>Desi</i>      | Ca_Desig_Scaffold05171       | 13108                          | (T/G)       |
| 36435       | CadSNP12030    | <i>Desi</i>      | Ca_Desig_Scaffold05171       | 13047                          | (G/A)       |
| 36436       | CadSNP12031    | <i>Desi</i>      | Ca_Desig_Scaffold05171       | 13113                          | (T/C)       |
| 36437       | CadSNP12032    | <i>Desi</i>      | Ca_Desig_Scaffold05180       | 10236                          | (T/C)       |
| 36438       | CadSNP12033    | <i>Desi</i>      | Ca_Desig_Scaffold05180       | 10297                          | (A/G)       |
| 36439       | CadSNP12034    | <i>Desi</i>      | Ca_Desig_Scaffold05181       | 2713                           | (T/C)       |
| 36440       | CadSNP12035    | <i>Desi</i>      | Ca_Desig_Scaffold05250       | 7505                           | (T/C)       |
| 36441       | CadSNP12036    | <i>Desi</i>      | Ca_Desig_Scaffold05250       | 8584                           | (A/G)       |

| <b>S.N.</b> | <b>SNP IDs</b> | <b>Cultivars</b> | <b>Chromosomes/scaffolds</b> | <b>Physical positions (bp)</b> | <b>SNPs</b> |
|-------------|----------------|------------------|------------------------------|--------------------------------|-------------|
| 36442       | CadSNP12037    | <i>Desi</i>      | Ca_Desig_Scaffold05261       | 12027                          | (A/G)       |
| 36443       | CadSNP12038    | <i>Desi</i>      | Ca_Desig_Scaffold05261       | 12030                          | (A/G)       |
| 36444       | CadSNP12039    | <i>Desi</i>      | Ca_Desig_Scaffold05263       | 11567                          | (A/C)       |
| 36445       | CadSNP12040    | <i>Desi</i>      | Ca_Desig_Scaffold05263       | 11571                          | (T/C)       |
| 36446       | CadSNP12041    | <i>Desi</i>      | Ca_Desig_Scaffold05308       | 8213                           | (C/A)       |
| 36447       | CadSNP12042    | <i>Desi</i>      | Ca_Desig_Scaffold05364       | 6117                           | (A/T)       |
| 36448       | CadSNP12043    | <i>Desi</i>      | Ca_Desig_Scaffold05365       | 11356                          | (A/G)       |
| 36449       | CadSNP12044    | <i>Desi</i>      | Ca_Desig_Scaffold05372       | 3439                           | (G/A)       |
| 36450       | CadSNP12045    | <i>Desi</i>      | Ca_Desig_Scaffold05372       | 6037                           | (A/G)       |
| 36451       | CadSNP12046    | <i>Desi</i>      | Ca_Desig_Scaffold05383       | 10642                          | (T/G)       |
| 36452       | CadSNP12047    | <i>Desi</i>      | Ca_Desig_Scaffold05383       | 10628                          | (T/G)       |
| 36453       | CadSNP12048    | <i>Desi</i>      | Ca_Desig_Scaffold05383       | 10613                          | (T/G)       |
| 36454       | CadSNP12049    | <i>Desi</i>      | Ca_Desig_Scaffold05383       | 10599                          | (C/T)       |
| 36455       | CadSNP12050    | <i>Desi</i>      | Ca_Desig_Scaffold05383       | 10593                          | (T/G)       |
| 36456       | CadSNP12051    | <i>Desi</i>      | Ca_Desig_Scaffold05401       | 3496                           | (C/T)       |
| 36457       | CadSNP12052    | <i>Desi</i>      | Ca_Desig_Scaffold05401       | 3468                           | (T/C)       |
| 36458       | CadSNP12053    | <i>Desi</i>      | Ca_Desig_Scaffold05409       | 4654                           | (C/T)       |
| 36459       | CadSNP12054    | <i>Desi</i>      | Ca_Desig_Scaffold05420       | 6156                           | (T/G)       |
| 36460       | CadSNP12055    | <i>Desi</i>      | Ca_Desig_Scaffold05423       | 8307                           | (T/A)       |
| 36461       | CadSNP12056    | <i>Desi</i>      | Ca_Desig_Scaffold05450       | 7625                           | (C/A)       |
| 36462       | CadSNP12057    | <i>Desi</i>      | Ca_Desig_Scaffold05450       | 7615                           | (T/C)       |
| 36463       | CadSNP12058    | <i>Desi</i>      | Ca_Desig_Scaffold05450       | 7608                           | (G/A)       |
| 36464       | CadSNP12059    | <i>Desi</i>      | Ca_Desig_Scaffold05512       | 8625                           | (A/G)       |
| 36465       | CadSNP12060    | <i>Desi</i>      | Ca_Desig_Scaffold05512       | 8650                           | (A/G)       |
| 36466       | CadSNP12061    | <i>Desi</i>      | Ca_Desig_Scaffold05518       | 2477                           | (T/A)       |
| 36467       | CadSNP12062    | <i>Desi</i>      | Ca_Desig_Scaffold05518       | 2503                           | (A/G)       |
| 36468       | CadSNP12063    | <i>Desi</i>      | Ca_Desig_Scaffold05518       | 2552                           | (G/A)       |
| 36469       | CadSNP12064    | <i>Desi</i>      | Ca_Desig_Scaffold05523       | 4359                           | (G/T)       |
| 36470       | CadSNP12065    | <i>Desi</i>      | Ca_Desig_Scaffold05523       | 4342                           | (G/A)       |
| 36471       | CadSNP12066    | <i>Desi</i>      | Ca_Desig_Scaffold05563       | 8223                           | (C/A)       |
| 36472       | CadSNP12067    | <i>Desi</i>      | Ca_Desig_Scaffold05563       | 8274                           | (A/G)       |
| 36473       | CadSNP12068    | <i>Desi</i>      | Ca_Desig_Scaffold05588       | 1307                           | (C/T)       |
| 36474       | CadSNP12069    | <i>Desi</i>      | Ca_Desig_Scaffold05595       | 1568                           | (G/A)       |
| 36475       | CadSNP12070    | <i>Desi</i>      | Ca_Desig_Scaffold05596       | 10937                          | (C/T)       |
| 36476       | CadSNP12071    | <i>Desi</i>      | Ca_Desig_Scaffold05604       | 4556                           | (C/A)       |
| 36477       | CadSNP12072    | <i>Desi</i>      | Ca_Desig_Scaffold05604       | 4542                           | (G/T)       |
| 36478       | CadSNP12073    | <i>Desi</i>      | Ca_Desig_Scaffold05604       | 4531                           | (A/G)       |
| 36479       | CadSNP12074    | <i>Desi</i>      | Ca_Desig_Scaffold05612       | 3208                           | (A/G)       |

| <b>S.N.</b> | <b>SNP IDs</b> | <b>Cultivars</b> | <b>Chromosomes/scaffolds</b> | <b>Physical positions (bp)</b> | <b>SNPs</b> |
|-------------|----------------|------------------|------------------------------|--------------------------------|-------------|
| 36480       | CadSNP12075    | <i>Desi</i>      | Ca_Desig_Scaffold05613       | 2512                           | (A/C)       |
| 36481       | CadSNP12076    | <i>Desi</i>      | Ca_Desig_Scaffold05613       | 2511                           | (A/C)       |
| 36482       | CadSNP12077    | <i>Desi</i>      | Ca_Desig_Scaffold05613       | 5139                           | (G/A)       |
| 36483       | CadSNP12078    | <i>Desi</i>      | Ca_Desig_Scaffold05613       | 5206                           | (A/C)       |
| 36484       | CadSNP12079    | <i>Desi</i>      | Ca_Desig_Scaffold05613       | 5209                           | (G/T)       |
| 36485       | CadSNP12080    | <i>Desi</i>      | Ca_Desig_Scaffold05613       | 5211                           | (A/G)       |
| 36486       | CadSNP12081    | <i>Desi</i>      | Ca_Desig_Scaffold05665       | 9717                           | (C/T)       |
| 36487       | CadSNP12082    | <i>Desi</i>      | Ca_Desig_Scaffold05665       | 9714                           | (T/A)       |
| 36488       | CadSNP12083    | <i>Desi</i>      | Ca_Desig_Scaffold05665       | 9695                           | (A/G)       |
| 36489       | CadSNP12084    | <i>Desi</i>      | Ca_Desig_Scaffold05665       | 9681                           | (C/T)       |
| 36490       | CadSNP12085    | <i>Desi</i>      | Ca_Desig_Scaffold05665       | 9675                           | (T/C)       |
| 36491       | CadSNP12086    | <i>Desi</i>      | Ca_Desig_Scaffold05665       | 9660                           | (C/T)       |
| 36492       | CadSNP12087    | <i>Desi</i>      | Ca_Desig_Scaffold05679       | 8342                           | (A/T)       |
| 36493       | CadSNP12088    | <i>Desi</i>      | Ca_Desig_Scaffold05685       | 519                            | (T/A)       |
| 36494       | CadSNP12089    | <i>Desi</i>      | Ca_Desig_Scaffold05685       | 528                            | (G/A)       |
| 36495       | CadSNP12090    | <i>Desi</i>      | Ca_Desig_Scaffold05685       | 532                            | (A/G)       |
| 36496       | CadSNP12091    | <i>Desi</i>      | Ca_Desig_Scaffold05685       | 543                            | (A/G)       |
| 36497       | CadSNP12092    | <i>Desi</i>      | Ca_Desig_Scaffold05685       | 544                            | (T/G)       |
| 36498       | CadSNP12093    | <i>Desi</i>      | Ca_Desig_Scaffold05685       | 549                            | (T/C)       |
| 36499       | CadSNP12094    | <i>Desi</i>      | Ca_Desig_Scaffold05685       | 557                            | (C/T)       |
| 36500       | CadSNP12095    | <i>Desi</i>      | Ca_Desig_Scaffold05691       | 6630                           | (T/A)       |
| 36501       | CadSNP12096    | <i>Desi</i>      | Ca_Desig_Scaffold05691       | 6622                           | (A/G)       |
| 36502       | CadSNP12097    | <i>Desi</i>      | Ca_Desig_Scaffold05691       | 9651                           | (G/C)       |
| 36503       | CadSNP12098    | <i>Desi</i>      | Ca_Desig_Scaffold05691       | 9617                           | (G/A)       |
| 36504       | CadSNP12099    | <i>Desi</i>      | Ca_Desig_Scaffold05691       | 11355                          | (A/G)       |
| 36505       | CadSNP12100    | <i>Desi</i>      | Ca_Desig_Scaffold05703       | 1824                           | (G/A)       |
| 36506       | CadSNP12101    | <i>Desi</i>      | Ca_Desig_Scaffold05703       | 2191                           | (T/C)       |
| 36507       | CadSNP12102    | <i>Desi</i>      | Ca_Desig_Scaffold05718       | 4811                           | (A/G)       |
| 36508       | CadSNP12103    | <i>Desi</i>      | Ca_Desig_Scaffold05718       | 4852                           | (T/G)       |
| 36509       | CadSNP12104    | <i>Desi</i>      | Ca_Desig_Scaffold05718       | 4853                           | (A/T)       |
| 36510       | CadSNP12105    | <i>Desi</i>      | Ca_Desig_Scaffold05718       | 6146                           | (T/A)       |
| 36511       | CadSNP12106    | <i>Desi</i>      | Ca_Desig_Scaffold05718       | 6138                           | (T/A)       |
| 36512       | CadSNP12107    | <i>Desi</i>      | Ca_Desig_Scaffold05718       | 7052                           | (G/A)       |
| 36513       | CadSNP12108    | <i>Desi</i>      | Ca_Desig_Scaffold05744       | 1857                           | (T/G)       |
| 36514       | CadSNP12109    | <i>Desi</i>      | Ca_Desig_Scaffold05753       | 7645                           | (G/A)       |
| 36515       | CadSNP12110    | <i>Desi</i>      | Ca_Desig_Scaffold05755       | 4788                           | (C/T)       |
| 36516       | CadSNP12111    | <i>Desi</i>      | Ca_Desig_Scaffold05767       | 7935                           | (C/T)       |
| 36517       | CadSNP12112    | <i>Desi</i>      | Ca_Desig_Scaffold05773       | 9905                           | (G/C)       |

| <b>S.N.</b> | <b>SNP IDs</b> | <b>Cultivars</b> | <b>Chromosomes/scaffolds</b> | <b>Physical positions (bp)</b> | <b>SNPs</b> |
|-------------|----------------|------------------|------------------------------|--------------------------------|-------------|
| 36518       | CadSNP12113    | <i>Desi</i>      | Ca_Desig_Scaffold05773       | 9882                           | (A/C)       |
| 36519       | CadSNP12114    | <i>Desi</i>      | Ca_Desig_Scaffold05793       | 5323                           | (G/A)       |
| 36520       | CadSNP12115    | <i>Desi</i>      | Ca_Desig_Scaffold05793       | 5350                           | (G/A)       |
| 36521       | CadSNP12116    | <i>Desi</i>      | Ca_Desig_Scaffold05793       | 5376                           | (G/T)       |
| 36522       | CadSNP12117    | <i>Desi</i>      | Ca_Desig_Scaffold05793       | 5382                           | (A/T)       |
| 36523       | CadSNP12118    | <i>Desi</i>      | Ca_Desig_Scaffold05824       | 374                            | (G/A)       |
| 36524       | CadSNP12119    | <i>Desi</i>      | Ca_Desig_Scaffold05824       | 206614                         | (C/T)       |
| 36525       | CadSNP12120    | <i>Desi</i>      | Ca_Desig_Scaffold05824       | 206605                         | (A/G)       |
| 36526       | CadSNP12121    | <i>Desi</i>      | Ca_Desig_Scaffold05824       | 206594                         | (C/G)       |
| 36527       | CadSNP12122    | <i>Desi</i>      | Ca_Desig_Scaffold05824       | 206705                         | (T/A)       |
| 36528       | CadSNP12123    | <i>Desi</i>      | Ca_Desig_Scaffold05824       | 206704                         | (T/A)       |
| 36529       | CadSNP12124    | <i>Desi</i>      | Ca_Desig_Scaffold05824       | 206669                         | (G/T)       |
| 36530       | CadSNP12125    | <i>Desi</i>      | Ca_Desig_Scaffold05824       | 206663                         | (G/T)       |
| 36531       | CadSNP12126    | <i>Desi</i>      | Ca_Desig_Scaffold05824       | 206645                         | (C/T)       |
| 36532       | CadSNP12127    | <i>Desi</i>      | Ca_Desig_Scaffold05824       | 245276                         | (G/A)       |
| 36533       | CadSNP12128    | <i>Desi</i>      | Ca_Desig_Scaffold05824       | 403369                         | (G/A)       |
| 36534       | CadSNP12129    | <i>Desi</i>      | Ca_Desig_Scaffold05824       | 404613                         | (T/C)       |
| 36535       | CadSNP12130    | <i>Desi</i>      | Ca_Desig_Scaffold05824       | 404670                         | (G/A)       |
| 36536       | CadSNP12131    | <i>Desi</i>      | Ca_Desig_Scaffold05824       | 551933                         | (G/A)       |
| 36537       | CadSNP12132    | <i>Desi</i>      | Ca_Desig_Scaffold05824       | 592493                         | (G/T)       |
| 36538       | CadSNP12133    | <i>Desi</i>      | Ca_Desig_Scaffold05824       | 592495                         | (A/T)       |
| 36539       | CadSNP12134    | <i>Desi</i>      | Ca_Desig_Scaffold05824       | 609081                         | (C/T)       |
| 36540       | CadSNP12135    | <i>Desi</i>      | Ca_Desig_Scaffold05824       | 622972                         | (C/T)       |
| 36541       | CadSNP12136    | <i>Desi</i>      | Ca_Desig_Scaffold05824       | 664247                         | (C/T)       |
| 36542       | CadSNP12137    | <i>Desi</i>      | Ca_Desig_Scaffold05824       | 664246                         | (G/T)       |
| 36543       | CadSNP12138    | <i>Desi</i>      | Ca_Desig_Scaffold05824       | 683807                         | (A/C)       |
| 36544       | CadSNP12139    | <i>Desi</i>      | Ca_Desig_Scaffold05824       | 710209                         | (T/A)       |
| 36545       | CadSNP12140    | <i>Desi</i>      | Ca_Desig_Scaffold05824       | 751076                         | (A/G)       |
| 36546       | CadSNP12141    | <i>Desi</i>      | Ca_Desig_Scaffold05824       | 755898                         | (G/A)       |
| 36547       | CadSNP12142    | <i>Desi</i>      | Ca_Desig_Scaffold05871       | 6128                           | (T/G)       |
| 36548       | CadSNP12143    | <i>Desi</i>      | Ca_Desig_Scaffold05882       | 6627                           | (T/C)       |
| 36549       | CadSNP12144    | <i>Desi</i>      | Ca_Desig_Scaffold05901       | 10501                          | (G/A)       |
| 36550       | CadSNP12145    | <i>Desi</i>      | Ca_Desig_Scaffold05901       | 10527                          | (T/C)       |
| 36551       | CadSNP12146    | <i>Desi</i>      | Ca_Desig_Scaffold05901       | 10539                          | (C/A)       |
| 36552       | CadSNP12147    | <i>Desi</i>      | Ca_Desig_Scaffold05901       | 10521                          | (G/A)       |
| 36553       | CadSNP12148    | <i>Desi</i>      | Ca_Desig_Scaffold05901       | 10617                          | (C/T)       |
| 36554       | CadSNP12149    | <i>Desi</i>      | Ca_Desig_Scaffold05901       | 10592                          | (C/T)       |
| 36555       | CadSNP12150    | <i>Desi</i>      | Ca_Desig_Scaffold05917       | 3598                           | (G/A)       |

| <b>S.N.</b> | <b>SNP IDs</b> | <b>Cultivars</b> | <b>Chromosomes/scaffolds</b> | <b>Physical positions (bp)</b> | <b>SNPs</b> |
|-------------|----------------|------------------|------------------------------|--------------------------------|-------------|
| 36556       | CadSNP12151    | <i>Desi</i>      | Ca_Desig_Scaffold05917       | 3604                           | (A/G)       |
| 36557       | CadSNP12152    | <i>Desi</i>      | Ca_Desig_Scaffold05917       | 3623                           | (G/C)       |
| 36558       | CadSNP12153    | <i>Desi</i>      | Ca_Desig_Scaffold05917       | 3631                           | (C/A)       |
| 36559       | CadSNP12154    | <i>Desi</i>      | Ca_Desig_Scaffold05917       | 3642                           | (A/G)       |
| 36560       | CadSNP12155    | <i>Desi</i>      | Ca_Desig_Scaffold05917       | 3676                           | (G/A)       |
| 36561       | CadSNP12156    | <i>Desi</i>      | Ca_Desig_Scaffold05917       | 3767                           | (C/A)       |
| 36562       | CadSNP12157    | <i>Desi</i>      | Ca_Desig_Scaffold05917       | 3756                           | (A/G)       |
| 36563       | CadSNP12158    | <i>Desi</i>      | Ca_Desig_Scaffold05917       | 3753                           | (A/G)       |
| 36564       | CadSNP12159    | <i>Desi</i>      | Ca_Desig_Scaffold05938       | 6461                           | (G/C)       |
| 36565       | CadSNP12160    | <i>Desi</i>      | Ca_Desig_Scaffold05943       | 10459                          | (A/G)       |
| 36566       | CadSNP12161    | <i>Desi</i>      | Ca_Desig_Scaffold05943       | 10538                          | (C/T)       |
| 36567       | CadSNP12162    | <i>Desi</i>      | Ca_Desig_Scaffold05945       | 47215                          | (A/C)       |
| 36568       | CadSNP12163    | <i>Desi</i>      | Ca_Desig_Scaffold05945       | 159054                         | (A/G)       |
| 36569       | CadSNP12164    | <i>Desi</i>      | Ca_Desig_Scaffold05945       | 184697                         | (C/T)       |
| 36570       | CadSNP12165    | <i>Desi</i>      | Ca_Desig_Scaffold05945       | 184695                         | (C/T)       |
| 36571       | CadSNP12166    | <i>Desi</i>      | Ca_Desig_Scaffold05945       | 184790                         | (C/T)       |
| 36572       | CadSNP12167    | <i>Desi</i>      | Ca_Desig_Scaffold05945       | 187070                         | (G/A)       |
| 36573       | CadSNP12168    | <i>Desi</i>      | Ca_Desig_Scaffold06004       | 85                             | (G/C)       |
| 36574       | CadSNP12169    | <i>Desi</i>      | Ca_Desig_Scaffold06007       | 5428                           | (A/G)       |
| 36575       | CadSNP12170    | <i>Desi</i>      | Ca_Desig_Scaffold06024       | 8554                           | (T/G)       |
| 36576       | CadSNP12171    | <i>Desi</i>      | Ca_Desig_Scaffold06038       | 170                            | (T/A)       |
| 36577       | CadSNP12172    | <i>Desi</i>      | Ca_Desig_Scaffold06051       | 5620                           | (C/T)       |
| 36578       | CadSNP12173    | <i>Desi</i>      | Ca_Desig_Scaffold06051       | 5732                           | (C/T)       |
| 36579       | CadSNP12174    | <i>Desi</i>      | Ca_Desig_Scaffold06051       | 7196                           | (A/G)       |
| 36580       | CadSNP12175    | <i>Desi</i>      | Ca_Desig_Scaffold06051       | 7233                           | (A/T)       |
| 36581       | CadSNP12176    | <i>Desi</i>      | Ca_Desig_Scaffold06082       | 881                            | (A/G)       |
| 36582       | CadSNP12177    | <i>Desi</i>      | Ca_Desig_Scaffold06082       | 6430                           | (T/C)       |
| 36583       | CadSNP12178    | <i>Desi</i>      | Ca_Desig_Scaffold06082       | 9224                           | (T/A)       |
| 36584       | CadSNP12179    | <i>Desi</i>      | Ca_Desig_Scaffold06086       | 7308                           | (A/C)       |
| 36585       | CadSNP12180    | <i>Desi</i>      | Ca_Desig_Scaffold06086       | 7309                           | (C/T)       |
| 36586       | CadSNP12181    | <i>Desi</i>      | Ca_Desig_Scaffold06086       | 7315                           | (A/G)       |
| 36587       | CadSNP12182    | <i>Desi</i>      | Ca_Desig_Scaffold06086       | 7359                           | (A/T)       |
| 36588       | CadSNP12183    | <i>Desi</i>      | Ca_Desig_Scaffold06087       | 6245                           | (T/G)       |
| 36589       | CadSNP12184    | <i>Desi</i>      | Ca_Desig_Scaffold06087       | 6343                           | (G/A)       |
| 36590       | CadSNP12185    | <i>Desi</i>      | Ca_Desig_Scaffold06087       | 6295                           | (C/A)       |
| 36591       | CadSNP12186    | <i>Desi</i>      | Ca_Desig_Scaffold06087       | 6449                           | (T/G)       |
| 36592       | CadSNP12187    | <i>Desi</i>      | Ca_Desig_Scaffold06087       | 6445                           | (C/T)       |
| 36593       | CadSNP12188    | <i>Desi</i>      | Ca_Desig_Scaffold06087       | 6434                           | (G/A)       |

| <b>S.N.</b> | <b>SNP IDs</b> | <b>Cultivars</b> | <b>Chromosomes/scaffolds</b> | <b>Physical positions (bp)</b> | <b>SNPs</b> |
|-------------|----------------|------------------|------------------------------|--------------------------------|-------------|
| 36594       | CadSNP12189    | <i>Desi</i>      | Ca_Desig_Scaffold06087       | 6433                           | (C/T)       |
| 36595       | CadSNP12190    | <i>Desi</i>      | Ca_Desig_Scaffold06087       | 6426                           | (G/A)       |
| 36596       | CadSNP12191    | <i>Desi</i>      | Ca_Desig_Scaffold06087       | 6419                           | (A/T)       |
| 36597       | CadSNP12192    | <i>Desi</i>      | Ca_Desig_Scaffold06087       | 6418                           | (C/T)       |
| 36598       | CadSNP12193    | <i>Desi</i>      | Ca_Desig_Scaffold06087       | 6413                           | (A/G)       |
| 36599       | CadSNP12194    | <i>Desi</i>      | Ca_Desig_Scaffold06087       | 6412                           | (T/C)       |
| 36600       | CadSNP12195    | <i>Desi</i>      | Ca_Desig_Scaffold06114       | 3797                           | (C/G)       |
| 36601       | CadSNP12196    | <i>Desi</i>      | Ca_Desig_Scaffold06130       | 2739                           | (T/A)       |
| 36602       | CadSNP12197    | <i>Desi</i>      | Ca_Desig_Scaffold06131       | 3816                           | (C/G)       |
| 36603       | CadSNP12198    | <i>Desi</i>      | Ca_Desig_Scaffold06131       | 4947                           | (A/T)       |
| 36604       | CadSNP12199    | <i>Desi</i>      | Ca_Desig_Scaffold06131       | 4967                           | (C/T)       |
| 36605       | CadSNP12200    | <i>Desi</i>      | Ca_Desig_Scaffold06132       | 3418                           | (T/A)       |
| 36606       | CadSNP12201    | <i>Desi</i>      | Ca_Desig_Scaffold06139       | 2240                           | (C/G)       |
| 36607       | CadSNP12202    | <i>Desi</i>      | Ca_Desig_Scaffold06143       | 8538                           | (T/G)       |
| 36608       | CadSNP12203    | <i>Desi</i>      | Ca_Desig_Scaffold06143       | 8595                           | (C/T)       |
| 36609       | CadSNP12204    | <i>Desi</i>      | Ca_Desig_Scaffold06143       | 8588                           | (T/C)       |
| 36610       | CadSNP12205    | <i>Desi</i>      | Ca_Desig_Scaffold06143       | 8568                           | (G/A)       |
| 36611       | CadSNP12206    | <i>Desi</i>      | Ca_Desig_Scaffold06143       | 8555                           | (C/G)       |
| 36612       | CadSNP12207    | <i>Desi</i>      | Ca_Desig_Scaffold06163       | 1941                           | (G/C)       |
| 36613       | CadSNP12208    | <i>Desi</i>      | Ca_Desig_Scaffold06163       | 7078                           | (T/G)       |
| 36614       | CadSNP12209    | <i>Desi</i>      | Ca_Desig_Scaffold06163       | 7210                           | (C/A)       |
| 36615       | CadSNP12210    | <i>Desi</i>      | Ca_Desig_Scaffold06176       | 1110                           | (G/C)       |
| 36616       | CadSNP12211    | <i>Desi</i>      | Ca_Desig_Scaffold06201       | 9029                           | (A/G)       |
| 36617       | CadSNP12212    | <i>Desi</i>      | Ca_Desig_Scaffold06201       | 9035                           | (A/G)       |
| 36618       | CadSNP12213    | <i>Desi</i>      | Ca_Desig_Scaffold06201       | 9041                           | (A/G)       |
| 36619       | CadSNP12214    | <i>Desi</i>      | Ca_Desig_Scaffold06209       | 4184                           | (T/C)       |
| 36620       | CadSNP12215    | <i>Desi</i>      | Ca_Desig_Scaffold06209       | 4160                           | (T/C)       |
| 36621       | CadSNP12216    | <i>Desi</i>      | Ca_Desig_Scaffold06209       | 4156                           | (C/A)       |
| 36622       | CadSNP12217    | <i>Desi</i>      | Ca_Desig_Scaffold06209       | 4146                           | (A/G)       |
| 36623       | CadSNP12218    | <i>Desi</i>      | Ca_Desig_Scaffold06222       | 1873                           | (G/C)       |
| 36624       | CadSNP12219    | <i>Desi</i>      | Ca_Desig_Scaffold06222       | 1880                           | (G/A)       |
| 36625       | CadSNP12220    | <i>Desi</i>      | Ca_Desig_Scaffold06222       | 6121                           | (C/T)       |
| 36626       | CadSNP12221    | <i>Desi</i>      | Ca_Desig_Scaffold06222       | 6208                           | (C/T)       |
| 36627       | CadSNP12222    | <i>Desi</i>      | Ca_Desig_Scaffold06235       | 3664                           | (A/C)       |
| 36628       | CadSNP12223    | <i>Desi</i>      | Ca_Desig_Scaffold06240       | 2260                           | (T/C)       |
| 36629       | CadSNP12224    | <i>Desi</i>      | Ca_Desig_Scaffold06240       | 2258                           | (A/C)       |
| 36630       | CadSNP12225    | <i>Desi</i>      | Ca_Desig_Scaffold06248       | 6259                           | (A/T)       |
| 36631       | CadSNP12226    | <i>Desi</i>      | Ca_Desig_Scaffold06269       | 5867                           | (G/A)       |

| <b>S.N.</b> | <b>SNP IDs</b> | <b>Cultivars</b> | <b>Chromosomes/scaffolds</b> | <b>Physical positions (bp)</b> | <b>SNPs</b> |
|-------------|----------------|------------------|------------------------------|--------------------------------|-------------|
| 36632       | CadSNP12227    | <i>Desi</i>      | Ca_Desig_Scaffold06280       | 3172                           | (A/C)       |
| 36633       | CadSNP12228    | <i>Desi</i>      | Ca_Desig_Scaffold06324       | 8970                           | (A/G)       |
| 36634       | CadSNP12229    | <i>Desi</i>      | Ca_Desig_Scaffold06342       | 3299                           | (G/A)       |
| 36635       | CadSNP12230    | <i>Desi</i>      | Ca_Desig_Scaffold06358       | 5432                           | (C/T)       |
| 36636       | CadSNP12231    | <i>Desi</i>      | Ca_Desig_Scaffold06358       | 5413                           | (G/A)       |
| 36637       | CadSNP12232    | <i>Desi</i>      | Ca_Desig_Scaffold06358       | 5419                           | (T/G)       |
| 36638       | CadSNP12233    | <i>Desi</i>      | Ca_Desig_Scaffold06358       | 5451                           | (T/A)       |
| 36639       | CadSNP12234    | <i>Desi</i>      | Ca_Desig_Scaffold06358       | 5475                           | (A/T)       |
| 36640       | CadSNP12235    | <i>Desi</i>      | Ca_Desig_Scaffold06360       | 1010                           | (G/A)       |
| 36641       | CadSNP12236    | <i>Desi</i>      | Ca_Desig_Scaffold06360       | 996                            | (C/A)       |
| 36642       | CadSNP12237    | <i>Desi</i>      | Ca_Desig_Scaffold06360       | 971                            | (A/C)       |
| 36643       | CadSNP12238    | <i>Desi</i>      | Ca_Desig_Scaffold06364       | 8592                           | (A/C)       |
| 36644       | CadSNP12239    | <i>Desi</i>      | Ca_Desig_Scaffold06365       | 2822                           | (A/G)       |
| 36645       | CadSNP12240    | <i>Desi</i>      | Ca_Desig_Scaffold06426       | 741                            | (A/G)       |
| 36646       | CadSNP12241    | <i>Desi</i>      | Ca_Desig_Scaffold06426       | 8220                           | (C/T)       |
| 36647       | CadSNP12242    | <i>Desi</i>      | Ca_Desig_Scaffold06426       | 8295                           | (T/C)       |
| 36648       | CadSNP12243    | <i>Desi</i>      | Ca_Desig_Scaffold06435       | 9067                           | (A/C)       |
| 36649       | CadSNP12244    | <i>Desi</i>      | Ca_Desig_Scaffold06439       | 3947                           | (T/C)       |
| 36650       | CadSNP12245    | <i>Desi</i>      | Ca_Desig_Scaffold06439       | 3968                           | (C/T)       |
| 36651       | CadSNP12246    | <i>Desi</i>      | Ca_Desig_Scaffold06439       | 4088                           | (G/A)       |
| 36652       | CadSNP12247    | <i>Desi</i>      | Ca_Desig_Scaffold06439       | 4071                           | (G/A)       |
| 36653       | CadSNP12248    | <i>Desi</i>      | Ca_Desig_Scaffold06466       | 6431                           | (G/T)       |
| 36654       | CadSNP12249    | <i>Desi</i>      | Ca_Desig_Scaffold06509       | 502                            | (C/T)       |
| 36655       | CadSNP12250    | <i>Desi</i>      | Ca_Desig_Scaffold06521       | 5184                           | (T/C)       |
| 36656       | CadSNP12251    | <i>Desi</i>      | Ca_Desig_Scaffold06546       | 8886                           | (C/A)       |
| 36657       | CadSNP12252    | <i>Desi</i>      | Ca_Desig_Scaffold06546       | 8969                           | (A/C)       |
| 36658       | CadSNP12253    | <i>Desi</i>      | Ca_Desig_Scaffold06546       | 8972                           | (T/A)       |
| 36659       | CadSNP12254    | <i>Desi</i>      | Ca_Desig_Scaffold06548       | 4204                           | (G/T)       |
| 36660       | CadSNP12255    | <i>Desi</i>      | Ca_Desig_Scaffold06548       | 4208                           | (C/T)       |
| 36661       | CadSNP12256    | <i>Desi</i>      | Ca_Desig_Scaffold06548       | 4213                           | (C/T)       |
| 36662       | CadSNP12257    | <i>Desi</i>      | Ca_Desig_Scaffold06548       | 4233                           | (T/C)       |
| 36663       | CadSNP12258    | <i>Desi</i>      | Ca_Desig_Scaffold06549       | 286                            | (T/A)       |
| 36664       | CadSNP12259    | <i>Desi</i>      | Ca_Desig_Scaffold06549       | 347                            | (A/T)       |
| 36665       | CadSNP12260    | <i>Desi</i>      | Ca_Desig_Scaffold06592       | 3618                           | (T/C)       |
| 36666       | CadSNP12261    | <i>Desi</i>      | Ca_Desig_Scaffold06604       | 479                            | (T/C)       |
| 36667       | CadSNP12262    | <i>Desi</i>      | Ca_Desig_Scaffold06604       | 496                            | (G/A)       |
| 36668       | CadSNP12263    | <i>Desi</i>      | Ca_Desig_Scaffold06604       | 501                            | (T/C)       |
| 36669       | CadSNP12264    | <i>Desi</i>      | Ca_Desig_Scaffold06610       | 7219                           | (G/C)       |

| <b>S.N.</b> | <b>SNP IDs</b> | <b>Cultivars</b> | <b>Chromosomes/scaffolds</b> | <b>Physical positions (bp)</b> | <b>SNPs</b> |
|-------------|----------------|------------------|------------------------------|--------------------------------|-------------|
| 36670       | CadSNP12265    | <i>Desi</i>      | Ca_Desig_Scaffold06610       | 7328                           | (A/G)       |
| 36671       | CadSNP12266    | <i>Desi</i>      | Ca_Desig_Scaffold06610       | 7305                           | (A/G)       |
| 36672       | CadSNP12267    | <i>Desi</i>      | Ca_Desig_Scaffold06698       | 4668                           | (A/G)       |
| 36673       | CadSNP12268    | <i>Desi</i>      | Ca_Desig_Scaffold06698       | 4709                           | (T/A)       |
| 36674       | CadSNP12269    | <i>Desi</i>      | Ca_Desig_Scaffold06741       | 162                            | (G/A)       |
| 36675       | CadSNP12270    | <i>Desi</i>      | Ca_Desig_Scaffold06745       | 1082                           | (G/A)       |
| 36676       | CadSNP12271    | <i>Desi</i>      | Ca_Desig_Scaffold06745       | 1098                           | (G/A)       |
| 36677       | CadSNP12272    | <i>Desi</i>      | Ca_Desig_Scaffold06745       | 1102                           | (G/A)       |
| 36678       | CadSNP12273    | <i>Desi</i>      | Ca_Desig_Scaffold06770       | 4888                           | (T/C)       |
| 36679       | CadSNP12274    | <i>Desi</i>      | Ca_Desig_Scaffold06790       | 7992                           | (T/A)       |
| 36680       | CadSNP12275    | <i>Desi</i>      | Ca_Desig_Scaffold06790       | 7969                           | (T/C)       |
| 36681       | CadSNP12276    | <i>Desi</i>      | Ca_Desig_Scaffold06791       | 4055                           | (C/A)       |
| 36682       | CadSNP12277    | <i>Desi</i>      | Ca_Desig_Scaffold06814       | 6373                           | (G/C)       |
| 36683       | CadSNP12278    | <i>Desi</i>      | Ca_Desig_Scaffold06814       | 6405                           | (T/A)       |
| 36684       | CadSNP12279    | <i>Desi</i>      | Ca_Desig_Scaffold06814       | 6432                           | (A/G)       |
| 36685       | CadSNP12280    | <i>Desi</i>      | Ca_Desig_Scaffold06822       | 1484                           | (A/C)       |
| 36686       | CadSNP12281    | <i>Desi</i>      | Ca_Desig_Scaffold06822       | 1414                           | (C/A)       |
| 36687       | CadSNP12282    | <i>Desi</i>      | Ca_Desig_Scaffold06825       | 8114                           | (A/C)       |
| 36688       | CadSNP12283    | <i>Desi</i>      | Ca_Desig_Scaffold06850       | 5137                           | (T/A)       |
| 36689       | CadSNP12284    | <i>Desi</i>      | Ca_Desig_Scaffold06860       | 4236                           | (C/T)       |
| 36690       | CadSNP12285    | <i>Desi</i>      | Ca_Desig_Scaffold06862       | 6507                           | (G/A)       |
| 36691       | CadSNP12286    | <i>Desi</i>      | Ca_Desig_Scaffold06903       | 6487                           | (A/C)       |
| 36692       | CadSNP12287    | <i>Desi</i>      | Ca_Desig_Scaffold06903       | 6488                           | (C/A)       |
| 36693       | CadSNP12288    | <i>Desi</i>      | Ca_Desig_Scaffold06903       | 6499                           | (T/A)       |
| 36694       | CadSNP12289    | <i>Desi</i>      | Ca_Desig_Scaffold06903       | 6893                           | (T/C)       |
| 36695       | CadSNP12290    | <i>Desi</i>      | Ca_Desig_Scaffold06903       | 6888                           | (G/T)       |
| 36696       | CadSNP12291    | <i>Desi</i>      | Ca_Desig_Scaffold06903       | 6879                           | (T/C)       |
| 36697       | CadSNP12292    | <i>Desi</i>      | Ca_Desig_Scaffold06903       | 6863                           | (A/C)       |
| 36698       | CadSNP12293    | <i>Desi</i>      | Ca_Desig_Scaffold06903       | 6849                           | (C/T)       |
| 36699       | CadSNP12294    | <i>Desi</i>      | Ca_Desig_Scaffold06903       | 6842                           | (C/G)       |
| 36700       | CadSNP12295    | <i>Desi</i>      | Ca_Desig_Scaffold06911       | 3650                           | (C/T)       |
| 36701       | CadSNP12296    | <i>Desi</i>      | Ca_Desig_Scaffold06915       | 7447                           | (A/G)       |
| 36702       | CadSNP12297    | <i>Desi</i>      | Ca_Desig_Scaffold06915       | 7444                           | (G/A)       |
| 36703       | CadSNP12298    | <i>Desi</i>      | Ca_Desig_Scaffold06915       | 7441                           | (C/A)       |
| 36704       | CadSNP12299    | <i>Desi</i>      | Ca_Desig_Scaffold06915       | 7432                           | (G/A)       |
| 36705       | CadSNP12300    | <i>Desi</i>      | Ca_Desig_Scaffold06915       | 7414                           | (A/G)       |
| 36706       | CadSNP12301    | <i>Desi</i>      | Ca_Desig_Scaffold06915       | 7413                           | (A/G)       |
| 36707       | CadSNP12302    | <i>Desi</i>      | Ca_Desig_Scaffold06915       | 7396                           | (A/G)       |



| <b>S.N.</b> | <b>SNP IDs</b> | <b>Cultivars</b> | <b>Chromosomes/scaffolds</b> | <b>Physical positions (bp)</b> | <b>SNPs</b> |
|-------------|----------------|------------------|------------------------------|--------------------------------|-------------|
| 36708       | CadSNP12303    | <i>Desi</i>      | Ca_Desig_Scaffold06915       | 7531                           | (C/T)       |
| 36709       | CadSNP12304    | <i>Desi</i>      | Ca_Desig_Scaffold06915       | 7496                           | (C/T)       |
| 36710       | CadSNP12305    | <i>Desi</i>      | Ca_Desig_Scaffold06915       | 8252                           | (A/T)       |
| 36711       | CadSNP12306    | <i>Desi</i>      | Ca_Desig_Scaffold06926       | 2881                           | (C/T)       |
| 36712       | CadSNP12307    | <i>Desi</i>      | Ca_Desig_Scaffold06926       | 2873                           | (G/T)       |
| 36713       | CadSNP12308    | <i>Desi</i>      | Ca_Desig_Scaffold06926       | 2871                           | (T/C)       |
| 36714       | CadSNP12309    | <i>Desi</i>      | Ca_Desig_Scaffold06934       | 12851                          | (A/C)       |
| 36715       | CadSNP12310    | <i>Desi</i>      | Ca_Desig_Scaffold06934       | 12855                          | (G/C)       |
| 36716       | CadSNP12311    | <i>Desi</i>      | Ca_Desig_Scaffold06934       | 12845                          | (A/T)       |
| 36717       | CadSNP12312    | <i>Desi</i>      | Ca_Desig_Scaffold06934       | 17160                          | (A/T)       |
| 36718       | CadSNP12313    | <i>Desi</i>      | Ca_Desig_Scaffold06934       | 17238                          | (G/T)       |
| 36719       | CadSNP12314    | <i>Desi</i>      | Ca_Desig_Scaffold06934       | 17237                          | (A/C)       |
| 36720       | CadSNP12315    | <i>Desi</i>      | Ca_Desig_Scaffold06934       | 17234                          | (G/A)       |
| 36721       | CadSNP12316    | <i>Desi</i>      | Ca_Desig_Scaffold06934       | 17896                          | (T/A)       |
| 36722       | CadSNP12317    | <i>Desi</i>      | Ca_Desig_Scaffold06944       | 83592                          | (A/G)       |
| 36723       | CadSNP12318    | <i>Desi</i>      | Ca_Desig_Scaffold06944       | 83621                          | (A/C)       |
| 36724       | CadSNP12319    | <i>Desi</i>      | Ca_Desig_Scaffold06944       | 87323                          | (G/A)       |
| 36725       | CadSNP12320    | <i>Desi</i>      | Ca_Desig_Scaffold06944       | 87379                          | (A/G)       |
| 36726       | CadSNP12321    | <i>Desi</i>      | Ca_Desig_Scaffold06944       | 101623                         | (C/G)       |
| 36727       | CadSNP12322    | <i>Desi</i>      | Ca_Desig_Scaffold06944       | 102057                         | (A/G)       |
| 36728       | CadSNP12323    | <i>Desi</i>      | Ca_Desig_Scaffold06944       | 106267                         | (T/G)       |
| 36729       | CadSNP12324    | <i>Desi</i>      | Ca_Desig_Scaffold06944       | 106308                         | (G/A)       |
| 36730       | CadSNP12325    | <i>Desi</i>      | Ca_Desig_Scaffold06944       | 151688                         | (T/G)       |
| 36731       | CadSNP12326    | <i>Desi</i>      | Ca_Desig_Scaffold06944       | 151712                         | (T/G)       |
| 36732       | CadSNP12327    | <i>Desi</i>      | Ca_Desig_Scaffold06944       | 151718                         | (C/A)       |
| 36733       | CadSNP12328    | <i>Desi</i>      | Ca_Desig_Scaffold06944       | 195416                         | (G/T)       |
| 36734       | CadSNP12329    | <i>Desi</i>      | Ca_Desig_Scaffold06951       | 4557                           | (T/A)       |
| 36735       | CadSNP12330    | <i>Desi</i>      | Ca_Desig_Scaffold06951       | 4662                           | (C/T)       |
| 36736       | CadSNP12331    | <i>Desi</i>      | Ca_Desig_Scaffold06951       | 4653                           | (T/A)       |
| 36737       | CadSNP12332    | <i>Desi</i>      | Ca_Desig_Scaffold06951       | 4779                           | (C/T)       |
| 36738       | CadSNP12333    | <i>Desi</i>      | Ca_Desig_Scaffold06951       | 6915                           | (T/A)       |
| 36739       | CadSNP12334    | <i>Desi</i>      | Ca_Desig_Scaffold06951       | 6884                           | (A/T)       |
| 36740       | CadSNP12335    | <i>Desi</i>      | Ca_Desig_Scaffold06951       | 6870                           | (A/C)       |
| 36741       | CadSNP12336    | <i>Desi</i>      | Ca_Desig_Scaffold06978       | 6755                           | (G/A)       |
| 36742       | CadSNP12337    | <i>Desi</i>      | Ca_Desig_Scaffold06978       | 6799                           | (G/A)       |
| 36743       | CadSNP12338    | <i>Desi</i>      | Ca_Desig_Scaffold07031       | 2083                           | (G/T)       |
| 36744       | CadSNP12339    | <i>Desi</i>      | Ca_Desig_Scaffold07031       | 7605                           | (T/G)       |
| 36745       | CadSNP12340    | <i>Desi</i>      | Ca_Desig_Scaffold07036       | 1498                           | (A/C)       |

| <b>S.N.</b> | <b>SNP IDs</b> | <b>Cultivars</b> | <b>Chromosomes/scaffolds</b> | <b>Physical positions (bp)</b> | <b>SNPs</b> |
|-------------|----------------|------------------|------------------------------|--------------------------------|-------------|
| 36746       | CadSNP12341    | <i>Desi</i>      | Ca_Desig_Scaffold07036       | 1489                           | (A/C)       |
| 36747       | CadSNP12342    | <i>Desi</i>      | Ca_Desig_Scaffold07074       | 2551                           | (T/G)       |
| 36748       | CadSNP12343    | <i>Desi</i>      | Ca_Desig_Scaffold07085       | 5369                           | (A/G)       |
| 36749       | CadSNP12344    | <i>Desi</i>      | Ca_Desig_Scaffold07126       | 7736                           | (T/G)       |
| 36750       | CadSNP12345    | <i>Desi</i>      | Ca_Desig_Scaffold07146       | 43247                          | (A/T)       |
| 36751       | CadSNP12346    | <i>Desi</i>      | Ca_Desig_Scaffold07146       | 48641                          | (T/C)       |
| 36752       | CadSNP12347    | <i>Desi</i>      | Ca_Desig_Scaffold07146       | 82920                          | (G/T)       |
| 36753       | CadSNP12348    | <i>Desi</i>      | Ca_Desig_Scaffold07154       | 6925                           | (A/C)       |
| 36754       | CadSNP12349    | <i>Desi</i>      | Ca_Desig_Scaffold07154       | 6981                           | (A/T)       |
| 36755       | CadSNP12350    | <i>Desi</i>      | Ca_Desig_Scaffold07154       | 6983                           | (T/C)       |
| 36756       | CadSNP12351    | <i>Desi</i>      | Ca_Desig_Scaffold07154       | 6988                           | (C/T)       |
| 36757       | CadSNP12352    | <i>Desi</i>      | Ca_Desig_Scaffold07188       | 6682                           | (G/T)       |
| 36758       | CadSNP12353    | <i>Desi</i>      | Ca_Desig_Scaffold07205       | 1464                           | (C/T)       |
| 36759       | CadSNP12354    | <i>Desi</i>      | Ca_Desig_Scaffold07205       | 1463                           | (C/A)       |
| 36760       | CadSNP12355    | <i>Desi</i>      | Ca_Desig_Scaffold07205       | 1442                           | (C/T)       |
| 36761       | CadSNP12356    | <i>Desi</i>      | Ca_Desig_Scaffold07205       | 1435                           | (A/G)       |
| 36762       | CadSNP12357    | <i>Desi</i>      | Ca_Desig_Scaffold07205       | 1434                           | (T/C)       |
| 36763       | CadSNP12358    | <i>Desi</i>      | Ca_Desig_Scaffold07205       | 1423                           | (C/T)       |
| 36764       | CadSNP12359    | <i>Desi</i>      | Ca_Desig_Scaffold07208       | 1175                           | (T/A)       |
| 36765       | CadSNP12360    | <i>Desi</i>      | Ca_Desig_Scaffold07208       | 1182                           | (C/G)       |
| 36766       | CadSNP12361    | <i>Desi</i>      | Ca_Desig_Scaffold07208       | 1189                           | (T/C)       |
| 36767       | CadSNP12362    | <i>Desi</i>      | Ca_Desig_Scaffold07208       | 1190                           | (T/C)       |
| 36768       | CadSNP12363    | <i>Desi</i>      | Ca_Desig_Scaffold07208       | 1193                           | (T/G)       |
| 36769       | CadSNP12364    | <i>Desi</i>      | Ca_Desig_Scaffold07208       | 1196                           | (T/A)       |
| 36770       | CadSNP12365    | <i>Desi</i>      | Ca_Desig_Scaffold07208       | 1199                           | (G/A)       |
| 36771       | CadSNP12366    | <i>Desi</i>      | Ca_Desig_Scaffold07208       | 1222                           | (G/T)       |
| 36772       | CadSNP12367    | <i>Desi</i>      | Ca_Desig_Scaffold07208       | 1225                           | (A/T)       |
| 36773       | CadSNP12368    | <i>Desi</i>      | Ca_Desig_Scaffold07208       | 1234                           | (G/T)       |
| 36774       | CadSNP12369    | <i>Desi</i>      | Ca_Desig_Scaffold07208       | 1241                           | (A/G)       |
| 36775       | CadSNP12370    | <i>Desi</i>      | Ca_Desig_Scaffold07208       | 1250                           | (T/C)       |
| 36776       | CadSNP12371    | <i>Desi</i>      | Ca_Desig_Scaffold07271       | 2725                           | (T/C)       |
| 36777       | CadSNP12372    | <i>Desi</i>      | Ca_Desig_Scaffold07286       | 423                            | (G/A)       |
| 36778       | CadSNP12373    | <i>Desi</i>      | Ca_Desig_Scaffold07286       | 426                            | (A/T)       |
| 36779       | CadSNP12374    | <i>Desi</i>      | Ca_Desig_Scaffold07286       | 429                            | (T/C)       |
| 36780       | CadSNP12375    | <i>Desi</i>      | Ca_Desig_Scaffold07286       | 434                            | (A/G)       |
| 36781       | CadSNP12376    | <i>Desi</i>      | Ca_Desig_Scaffold07286       | 576                            | (G/A)       |
| 36782       | CadSNP12377    | <i>Desi</i>      | Ca_Desig_Scaffold07286       | 573                            | (T/G)       |
| 36783       | CadSNP12378    | <i>Desi</i>      | Ca_Desig_Scaffold07289       | 928                            | (T/C)       |

| <b>S.N.</b> | <b>SNP IDs</b> | <b>Cultivars</b> | <b>Chromosomes/scaffolds</b> | <b>Physical positions (bp)</b> | <b>SNPs</b> |
|-------------|----------------|------------------|------------------------------|--------------------------------|-------------|
| 36784       | CadSNP12379    | <i>Desi</i>      | Ca_Desig_Scaffold07289       | 1085                           | (G/C)       |
| 36785       | CadSNP12380    | <i>Desi</i>      | Ca_Desig_Scaffold07289       | 4309                           | (G/A)       |
| 36786       | CadSNP12381    | <i>Desi</i>      | Ca_Desig_Scaffold07293       | 5395                           | (G/T)       |
| 36787       | CadSNP12382    | <i>Desi</i>      | Ca_Desig_Scaffold07293       | 5392                           | (A/T)       |
| 36788       | CadSNP12383    | <i>Desi</i>      | Ca_Desig_Scaffold07293       | 5439                           | (A/C)       |
| 36789       | CadSNP12384    | <i>Desi</i>      | Ca_Desig_Scaffold07343       | 1805                           | (C/T)       |
| 36790       | CadSNP12385    | <i>Desi</i>      | Ca_Desig_Scaffold07374       | 6460                           | (G/A)       |
| 36791       | CadSNP12386    | <i>Desi</i>      | Ca_Desig_Scaffold07379       | 7720                           | (C/A)       |
| 36792       | CadSNP12387    | <i>Desi</i>      | Ca_Desig_Scaffold07379       | 7714                           | (C/A)       |
| 36793       | CadSNP12388    | <i>Desi</i>      | Ca_Desig_Scaffold07379       | 7716                           | (T/G)       |
| 36794       | CadSNP12389    | <i>Desi</i>      | Ca_Desig_Scaffold07379       | 7722                           | (A/G)       |
| 36795       | CadSNP12390    | <i>Desi</i>      | Ca_Desig_Scaffold07407       | 3423                           | (T/A)       |
| 36796       | CadSNP12391    | <i>Desi</i>      | Ca_Desig_Scaffold07407       | 3762                           | (A/T)       |
| 36797       | CadSNP12392    | <i>Desi</i>      | Ca_Desig_Scaffold07423       | 3095                           | (C/T)       |
| 36798       | CadSNP12393    | <i>Desi</i>      | Ca_Desig_Scaffold07423       | 3100                           | (T/G)       |
| 36799       | CadSNP12394    | <i>Desi</i>      | Ca_Desig_Scaffold07423       | 3150                           | (C/T)       |
| 36800       | CadSNP12395    | <i>Desi</i>      | Ca_Desig_Scaffold07423       | 3251                           | (T/C)       |
| 36801       | CadSNP12396    | <i>Desi</i>      | Ca_Desig_Scaffold07423       | 3336                           | (T/C)       |
| 36802       | CadSNP12397    | <i>Desi</i>      | Ca_Desig_Scaffold07423       | 3341                           | (T/C)       |
| 36803       | CadSNP12398    | <i>Desi</i>      | Ca_Desig_Scaffold07423       | 3342                           | (A/T)       |
| 36804       | CadSNP12399    | <i>Desi</i>      | Ca_Desig_Scaffold07423       | 3343                           | (G/C)       |
| 36805       | CadSNP12400    | <i>Desi</i>      | Ca_Desig_Scaffold07423       | 3394                           | (T/C)       |
| 36806       | CadSNP12401    | <i>Desi</i>      | Ca_Desig_Scaffold07427       | 6992                           | (C/A)       |
| 36807       | CadSNP12402    | <i>Desi</i>      | Ca_Desig_Scaffold07477       | 6451                           | (C/A)       |
| 36808       | CadSNP12403    | <i>Desi</i>      | Ca_Desig_Scaffold07498       | 51                             | (A/G)       |
| 36809       | CadSNP12404    | <i>Desi</i>      | Ca_Desig_Scaffold07533       | 7368                           | (G/A)       |
| 36810       | CadSNP12405    | <i>Desi</i>      | Ca_Desig_Scaffold07533       | 7370                           | (G/A)       |
| 36811       | CadSNP12406    | <i>Desi</i>      | Ca_Desig_Scaffold07533       | 7365                           | (A/G)       |
| 36812       | CadSNP12407    | <i>Desi</i>      | Ca_Desig_Scaffold07566       | 5731                           | (G/T)       |
| 36813       | CadSNP12408    | <i>Desi</i>      | Ca_Desig_Scaffold07577       | 4158                           | (C/T)       |
| 36814       | CadSNP12409    | <i>Desi</i>      | Ca_Desig_Scaffold07577       | 4187                           | (C/T)       |
| 36815       | CadSNP12410    | <i>Desi</i>      | Ca_Desig_Scaffold07577       | 4180                           | (T/G)       |
| 36816       | CadSNP12411    | <i>Desi</i>      | Ca_Desig_Scaffold07586       | 3408                           | (A/T)       |
| 36817       | CadSNP12412    | <i>Desi</i>      | Ca_Desig_Scaffold07590       | 2694                           | (A/C)       |
| 36818       | CadSNP12413    | <i>Desi</i>      | Ca_Desig_Scaffold07633       | 6829                           | (G/T)       |
| 36819       | CadSNP12414    | <i>Desi</i>      | Ca_Desig_Scaffold07636       | 7292                           | (G/A)       |
| 36820       | CadSNP12415    | <i>Desi</i>      | Ca_Desig_Scaffold07667       | 440                            | (T/C)       |
| 36821       | CadSNP12416    | <i>Desi</i>      | Ca_Desig_Scaffold07676       | 4781                           | (C/T)       |

| <b>S.N.</b> | <b>SNP IDs</b> | <b>Cultivars</b> | <b>Chromosomes/scaffolds</b> | <b>Physical positions (bp)</b> | <b>SNPs</b> |
|-------------|----------------|------------------|------------------------------|--------------------------------|-------------|
| 36822       | CadSNP12417    | <i>Desi</i>      | Ca_Desig_Scaffold07676       | 4799                           | (A/G)       |
| 36823       | CadSNP12418    | <i>Desi</i>      | Ca_Desig_Scaffold07686       | 4327                           | (C/T)       |
| 36824       | CadSNP12419    | <i>Desi</i>      | Ca_Desig_Scaffold07686       | 4284                           | (G/T)       |
| 36825       | CadSNP12420    | <i>Desi</i>      | Ca_Desig_Scaffold07686       | 4316                           | (G/A)       |
| 36826       | CadSNP12421    | <i>Desi</i>      | Ca_Desig_Scaffold07723       | 6053                           | (A/C)       |
| 36827       | CadSNP12422    | <i>Desi</i>      | Ca_Desig_Scaffold07751       | 3844                           | (T/C)       |
| 36828       | CadSNP12423    | <i>Desi</i>      | Ca_Desig_Scaffold07751       | 3900                           | (G/T)       |
| 36829       | CadSNP12424    | <i>Desi</i>      | Ca_Desig_Scaffold07800       | 3612                           | (G/C)       |
| 36830       | CadSNP12425    | <i>Desi</i>      | Ca_Desig_Scaffold07800       | 4259                           | (C/A)       |
| 36831       | CadSNP12426    | <i>Desi</i>      | Ca_Desig_Scaffold07800       | 4263                           | (C/T)       |
| 36832       | CadSNP12427    | <i>Desi</i>      | Ca_Desig_Scaffold07800       | 6059                           | (T/C)       |
| 36833       | CadSNP12428    | <i>Desi</i>      | Ca_Desig_Scaffold07803       | 63                             | (T/C)       |
| 36834       | CadSNP12429    | <i>Desi</i>      | Ca_Desig_Scaffold07827       | 4837                           | (G/A)       |
| 36835       | CadSNP12430    | <i>Desi</i>      | Ca_Desig_Scaffold07828       | 6233                           | (T/C)       |
| 36836       | CadSNP12431    | <i>Desi</i>      | Ca_Desig_Scaffold07828       | 6357                           | (T/G)       |
| 36837       | CadSNP12432    | <i>Desi</i>      | Ca_Desig_Scaffold07828       | 6379                           | (T/G)       |
| 36838       | CadSNP12433    | <i>Desi</i>      | Ca_Desig_Scaffold07839       | 4890                           | (G/A)       |
| 36839       | CadSNP12434    | <i>Desi</i>      | Ca_Desig_Scaffold07839       | 4887                           | (G/T)       |
| 36840       | CadSNP12435    | <i>Desi</i>      | Ca_Desig_Scaffold07855       | 4022                           | (T/C)       |
| 36841       | CadSNP12436    | <i>Desi</i>      | Ca_Desig_Scaffold07877       | 2091                           | (G/A)       |
| 36842       | CadSNP12437    | <i>Desi</i>      | Ca_Desig_Scaffold07887       | 1497                           | (G/A)       |
| 36843       | CadSNP12438    | <i>Desi</i>      | Ca_Desig_Scaffold07887       | 1483                           | (A/C)       |
| 36844       | CadSNP12439    | <i>Desi</i>      | Ca_Desig_Scaffold07915       | 65603                          | (G/A)       |
| 36845       | CadSNP12440    | <i>Desi</i>      | Ca_Desig_Scaffold07925       | 4182                           | (C/T)       |
| 36846       | CadSNP12441    | <i>Desi</i>      | Ca_Desig_Scaffold07925       | 4457                           | (G/A)       |
| 36847       | CadSNP12442    | <i>Desi</i>      | Ca_Desig_Scaffold07925       | 4532                           | (G/A)       |
| 36848       | CadSNP12443    | <i>Desi</i>      | Ca_Desig_Scaffold07950       | 6976                           | (G/A)       |
| 36849       | CadSNP12444    | <i>Desi</i>      | Ca_Desig_Scaffold07964       | 769                            | (T/C)       |
| 36850       | CadSNP12445    | <i>Desi</i>      | Ca_Desig_Scaffold07964       | 764                            | (G/A)       |
| 36851       | CadSNP12446    | <i>Desi</i>      | Ca_Desig_Scaffold07964       | 759                            | (T/G)       |
| 36852       | CadSNP12447    | <i>Desi</i>      | Ca_Desig_Scaffold07964       | 758                            | (T/A)       |
| 36853       | CadSNP12448    | <i>Desi</i>      | Ca_Desig_Scaffold07964       | 731                            | (A/C)       |
| 36854       | CadSNP12449    | <i>Desi</i>      | Ca_Desig_Scaffold07964       | 801                            | (C/A)       |
| 36855       | CadSNP12450    | <i>Desi</i>      | Ca_Desig_Scaffold07964       | 807                            | (C/T)       |
| 36856       | CadSNP12451    | <i>Desi</i>      | Ca_Desig_Scaffold07964       | 800                            | (G/C)       |
| 36857       | CadSNP12452    | <i>Desi</i>      | Ca_Desig_Scaffold07964       | 775                            | (C/T)       |
| 36858       | CadSNP12453    | <i>Desi</i>      | Ca_Desig_Scaffold07974       | 1446                           | (T/C)       |
| 36859       | CadSNP12454    | <i>Desi</i>      | Ca_Desig_Scaffold07994       | 2023                           | (A/G)       |

| <b>S.N.</b> | <b>SNP IDs</b> | <b>Cultivars</b> | <b>Chromosomes/scaffolds</b> | <b>Physical positions (bp)</b> | <b>SNPs</b> |
|-------------|----------------|------------------|------------------------------|--------------------------------|-------------|
| 36860       | CadSNP12455    | <i>Desi</i>      | Ca_Desig_Scaffold07994       | 2189                           | (T/G)       |
| 36861       | CadSNP12456    | <i>Desi</i>      | Ca_Desig_Scaffold07994       | 5349                           | (T/C)       |
| 36862       | CadSNP12457    | <i>Desi</i>      | Ca_Desig_Scaffold08005       | 1683                           | (G/A)       |
| 36863       | CadSNP12458    | <i>Desi</i>      | Ca_Desig_Scaffold08052       | 2538                           | (G/A)       |
| 36864       | CadSNP12459    | <i>Desi</i>      | Ca_Desig_Scaffold08052       | 5210                           | (T/C)       |
| 36865       | CadSNP12460    | <i>Desi</i>      | Ca_Desig_Scaffold08052       | 5240                           | (G/A)       |
| 36866       | CadSNP12461    | <i>Desi</i>      | Ca_Desig_Scaffold08052       | 5287                           | (G/A)       |
| 36867       | CadSNP12462    | <i>Desi</i>      | Ca_Desig_Scaffold08074       | 3980                           | (G/A)       |
| 36868       | CadSNP12463    | <i>Desi</i>      | Ca_Desig_Scaffold08102       | 1240                           | (T/A)       |
| 36869       | CadSNP12464    | <i>Desi</i>      | Ca_Desig_Scaffold08102       | 1242                           | (T/G)       |
| 36870       | CadSNP12465    | <i>Desi</i>      | Ca_Desig_Scaffold08102       | 1247                           | (G/A)       |
| 36871       | CadSNP12466    | <i>Desi</i>      | Ca_Desig_Scaffold08176       | 3576                           | (G/C)       |
| 36872       | CadSNP12467    | <i>Desi</i>      | Ca_Desig_Scaffold08199       | 308                            | (A/C)       |
| 36873       | CadSNP12468    | <i>Desi</i>      | Ca_Desig_Scaffold08229       | 119                            | (G/A)       |
| 36874       | CadSNP12469    | <i>Desi</i>      | Ca_Desig_Scaffold08229       | 120                            | (C/T)       |
| 36875       | CadSNP12470    | <i>Desi</i>      | Ca_Desig_Scaffold08229       | 134                            | (A/G)       |
| 36876       | CadSNP12471    | <i>Desi</i>      | Ca_Desig_Scaffold08229       | 157                            | (T/C)       |
| 36877       | CadSNP12472    | <i>Desi</i>      | Ca_Desig_Scaffold08230       | 6531                           | (A/C)       |
| 36878       | CadSNP12473    | <i>Desi</i>      | Ca_Desig_Scaffold08230       | 6617                           | (T/G)       |
| 36879       | CadSNP12474    | <i>Desi</i>      | Ca_Desig_Scaffold08230       | 6619                           | (T/C)       |
| 36880       | CadSNP12475    | <i>Desi</i>      | Ca_Desig_Scaffold08249       | 5640                           | (T/C)       |
| 36881       | CadSNP12476    | <i>Desi</i>      | Ca_Desig_Scaffold08257       | 4575                           | (T/C)       |
| 36882       | CadSNP12477    | <i>Desi</i>      | Ca_Desig_Scaffold08257       | 4722                           | (T/C)       |
| 36883       | CadSNP12478    | <i>Desi</i>      | Ca_Desig_Scaffold08272       | 303                            | (G/C)       |
| 36884       | CadSNP12479    | <i>Desi</i>      | Ca_Desig_Scaffold08272       | 366                            | (A/G)       |
| 36885       | CadSNP12480    | <i>Desi</i>      | Ca_Desig_Scaffold08302       | 2787                           | (A/C)       |
| 36886       | CadSNP12481    | <i>Desi</i>      | Ca_Desig_Scaffold08302       | 2846                           | (C/T)       |
| 36887       | CadSNP12482    | <i>Desi</i>      | Ca_Desig_Scaffold08302       | 2863                           | (A/C)       |
| 36888       | CadSNP12483    | <i>Desi</i>      | Ca_Desig_Scaffold08306       | 4999                           | (T/C)       |
| 36889       | CadSNP12484    | <i>Desi</i>      | Ca_Desig_Scaffold08306       | 5964                           | (G/A)       |
| 36890       | CadSNP12485    | <i>Desi</i>      | Ca_Desig_Scaffold08319       | 62365                          | (C/A)       |
| 36891       | CadSNP12486    | <i>Desi</i>      | Ca_Desig_Scaffold08319       | 64314                          | (A/G)       |
| 36892       | CadSNP12487    | <i>Desi</i>      | Ca_Desig_Scaffold08319       | 64371                          | (G/A)       |
| 36893       | CadSNP12488    | <i>Desi</i>      | Ca_Desig_Scaffold08344       | 249                            | (G/A)       |
| 36894       | CadSNP12489    | <i>Desi</i>      | Ca_Desig_Scaffold08344       | 282                            | (C/T)       |
| 36895       | CadSNP12490    | <i>Desi</i>      | Ca_Desig_Scaffold08344       | 318                            | (G/A)       |
| 36896       | CadSNP12491    | <i>Desi</i>      | Ca_Desig_Scaffold08344       | 329                            | (G/A)       |
| 36897       | CadSNP12492    | <i>Desi</i>      | Ca_Desig_Scaffold08364       | 5741                           | (A/G)       |

| <b>S.N.</b> | <b>SNP IDs</b> | <b>Cultivars</b> | <b>Chromosomes/scaffolds</b> | <b>Physical positions (bp)</b> | <b>SNPs</b> |
|-------------|----------------|------------------|------------------------------|--------------------------------|-------------|
| 36898       | CadSNP12493    | <i>Desi</i>      | Ca_Desig_Scaffold08417       | 5497                           | (C/T)       |
| 36899       | CadSNP12494    | <i>Desi</i>      | Ca_Desig_Scaffold08417       | 5632                           | (G/C)       |
| 36900       | CadSNP12495    | <i>Desi</i>      | Ca_Desig_Scaffold08417       | 5583                           | (A/G)       |
| 36901       | CadSNP12496    | <i>Desi</i>      | Ca_Desig_Scaffold08417       | 5694                           | (T/A)       |
| 36902       | CadSNP12497    | <i>Desi</i>      | Ca_Desig_Scaffold08418       | 792                            | (T/C)       |
| 36903       | CadSNP12498    | <i>Desi</i>      | Ca_Desig_Scaffold08418       | 788                            | (G/A)       |
| 36904       | CadSNP12499    | <i>Desi</i>      | Ca_Desig_Scaffold08418       | 886                            | (T/G)       |
| 36905       | CadSNP12500    | <i>Desi</i>      | Ca_Desig_Scaffold08418       | 890                            | (C/G)       |
| 36906       | CadSNP12501    | <i>Desi</i>      | Ca_Desig_Scaffold08434       | 3567                           | (C/T)       |
| 36907       | CadSNP12502    | <i>Desi</i>      | Ca_Desig_Scaffold08555       | 4773                           | (A/G)       |
| 36908       | CadSNP12503    | <i>Desi</i>      | Ca_Desig_Scaffold08555       | 4741                           | (A/T)       |
| 36909       | CadSNP12504    | <i>Desi</i>      | Ca_Desig_Scaffold08555       | 4733                           | (C/G)       |
| 36910       | CadSNP12505    | <i>Desi</i>      | Ca_Desig_Scaffold08555       | 4731                           | (A/T)       |
| 36911       | CadSNP12506    | <i>Desi</i>      | Ca_Desig_Scaffold08555       | 4728                           | (G/T)       |
| 36912       | CadSNP12507    | <i>Desi</i>      | Ca_Desig_Scaffold08555       | 4721                           | (G/T)       |
| 36913       | CadSNP12508    | <i>Desi</i>      | Ca_Desig_Scaffold08555       | 4720                           | (G/A)       |
| 36914       | CadSNP12509    | <i>Desi</i>      | Ca_Desig_Scaffold08555       | 4710                           | (T/A)       |
| 36915       | CadSNP12510    | <i>Desi</i>      | Ca_Desig_Scaffold08557       | 92                             | (T/C)       |
| 36916       | CadSNP12511    | <i>Desi</i>      | Ca_Desig_Scaffold08557       | 133                            | (G/A)       |
| 36917       | CadSNP12512    | <i>Desi</i>      | Ca_Desig_Scaffold08572       | 4864                           | (C/G)       |
| 36918       | CadSNP12513    | <i>Desi</i>      | Ca_Desig_Scaffold08578       | 163                            | (C/A)       |
| 36919       | CadSNP12514    | <i>Desi</i>      | Ca_Desig_Scaffold08578       | 174                            | (A/G)       |
| 36920       | CadSNP12515    | <i>Desi</i>      | Ca_Desig_Scaffold08578       | 181                            | (A/G)       |
| 36921       | CadSNP12516    | <i>Desi</i>      | Ca_Desig_Scaffold08594       | 2021                           | (T/C)       |
| 36922       | CadSNP12517    | <i>Desi</i>      | Ca_Desig_Scaffold08594       | 3271                           | (G/A)       |
| 36923       | CadSNP12518    | <i>Desi</i>      | Ca_Desig_Scaffold08627       | 2861                           | (A/G)       |
| 36924       | CadSNP12519    | <i>Desi</i>      | Ca_Desig_Scaffold08636       | 4056                           | (A/G)       |
| 36925       | CadSNP12520    | <i>Desi</i>      | Ca_Desig_Scaffold08636       | 4306                           | (T/C)       |
| 36926       | CadSNP12521    | <i>Desi</i>      | Ca_Desig_Scaffold08685       | 3908                           | (T/A)       |
| 36927       | CadSNP12522    | <i>Desi</i>      | Ca_Desig_Scaffold08695       | 4329                           | (C/A)       |
| 36928       | CadSNP12523    | <i>Desi</i>      | Ca_Desig_Scaffold08723       | 4797                           | (C/A)       |
| 36929       | CadSNP12524    | <i>Desi</i>      | Ca_Desig_Scaffold08723       | 4743                           | (A/C)       |
| 36930       | CadSNP12525    | <i>Desi</i>      | Ca_Desig_Scaffold08805       | 1841                           | (T/G)       |
| 36931       | CadSNP12526    | <i>Desi</i>      | Ca_Desig_Scaffold08806       | 1931                           | (T/C)       |
| 36932       | CadSNP12527    | <i>Desi</i>      | Ca_Desig_Scaffold08826       | 5785                           | (G/A)       |
| 36933       | CadSNP12528    | <i>Desi</i>      | Ca_Desig_Scaffold08826       | 5784                           | (C/A)       |
| 36934       | CadSNP12529    | <i>Desi</i>      | Ca_Desig_Scaffold08826       | 5778                           | (C/A)       |
| 36935       | CadSNP12530    | <i>Desi</i>      | Ca_Desig_Scaffold08826       | 5748                           | (T/A)       |

| <b>S.N.</b> | <b>SNP IDs</b> | <b>Cultivars</b> | <b>Chromosomes/scaffolds</b> | <b>Physical positions (bp)</b> | <b>SNPs</b> |
|-------------|----------------|------------------|------------------------------|--------------------------------|-------------|
| 36936       | CadSNP12531    | <i>Desi</i>      | Ca_Desig_Scaffold08826       | 5726                           | (T/A)       |
| 36937       | CadSNP12532    | <i>Desi</i>      | Ca_Desig_Scaffold08872       | 3778                           | (C/T)       |
| 36938       | CadSNP12533    | <i>Desi</i>      | Ca_Desig_Scaffold08916       | 4278                           | (T/C)       |
| 36939       | CadSNP12534    | <i>Desi</i>      | Ca_Desig_Scaffold08920       | 2388                           | (A/G)       |
| 36940       | CadSNP12535    | <i>Desi</i>      | Ca_Desig_Scaffold08927       | 880                            | (A/T)       |
| 36941       | CadSNP12536    | <i>Desi</i>      | Ca_Desig_Scaffold08937       | 3478                           | (T/A)       |
| 36942       | CadSNP12537    | <i>Desi</i>      | Ca_Desig_Scaffold08953       | 2495                           | (A/C)       |
| 36943       | CadSNP12538    | <i>Desi</i>      | Ca_Desig_Scaffold08987       | 3969                           | (T/C)       |
| 36944       | CadSNP12539    | <i>Desi</i>      | Ca_Desig_Scaffold08987       | 4169                           | (T/G)       |
| 36945       | CadSNP12540    | <i>Desi</i>      | Ca_Desig_Scaffold09043       | 1466                           | (C/T)       |
| 36946       | CadSNP12541    | <i>Desi</i>      | Ca_Desig_Scaffold09043       | 1499                           | (T/C)       |
| 36947       | CadSNP12542    | <i>Desi</i>      | Ca_Desig_Scaffold09073       | 1884                           | (T/C)       |
| 36948       | CadSNP12543    | <i>Desi</i>      | Ca_Desig_Scaffold09086       | 5831                           | (A/G)       |
| 36949       | CadSNP12544    | <i>Desi</i>      | Ca_Desig_Scaffold09086       | 5815                           | (C/T)       |
| 36950       | CadSNP12545    | <i>Desi</i>      | Ca_Desig_Scaffold09086       | 5804                           | (T/G)       |
| 36951       | CadSNP12546    | <i>Desi</i>      | Ca_Desig_Scaffold09086       | 5793                           | (A/G)       |
| 36952       | CadSNP12547    | <i>Desi</i>      | Ca_Desig_Scaffold09086       | 5791                           | (T/A)       |
| 36953       | CadSNP12548    | <i>Desi</i>      | Ca_Desig_Scaffold09097       | 2032                           | (G/A)       |
| 36954       | CadSNP12549    | <i>Desi</i>      | Ca_Desig_Scaffold09097       | 2097                           | (G/T)       |
| 36955       | CadSNP12550    | <i>Desi</i>      | Ca_Desig_Scaffold09108       | 2564                           | (T/C)       |
| 36956       | CadSNP12551    | <i>Desi</i>      | Ca_Desig_Scaffold09127       | 2298                           | (G/A)       |
| 36957       | CadSNP12552    | <i>Desi</i>      | Ca_Desig_Scaffold09127       | 2481                           | (A/C)       |
| 36958       | CadSNP12553    | <i>Desi</i>      | Ca_Desig_Scaffold09127       | 2457                           | (G/A)       |
| 36959       | CadSNP12554    | <i>Desi</i>      | Ca_Desig_Scaffold09239       | 2438                           | (C/A)       |
| 36960       | CadSNP12555    | <i>Desi</i>      | Ca_Desig_Scaffold09239       | 2494                           | (G/C)       |
| 36961       | CadSNP12556    | <i>Desi</i>      | Ca_Desig_Scaffold09239       | 2738                           | (A/G)       |
| 36962       | CadSNP12557    | <i>Desi</i>      | Ca_Desig_Scaffold09239       | 2824                           | (C/T)       |
| 36963       | CadSNP12558    | <i>Desi</i>      | Ca_Desig_Scaffold09246       | 2927                           | (C/G)       |
| 36964       | CadSNP12559    | <i>Desi</i>      | Ca_Desig_Scaffold09257       | 1647                           | (T/G)       |
| 36965       | CadSNP12560    | <i>Desi</i>      | Ca_Desig_Scaffold09279       | 4408                           | (G/T)       |
| 36966       | CadSNP12561    | <i>Desi</i>      | Ca_Desig_Scaffold09334       | 2026                           | (C/G)       |
| 36967       | CadSNP12562    | <i>Desi</i>      | Ca_Desig_Scaffold09348       | 21159                          | (T/C)       |
| 36968       | CadSNP12563    | <i>Desi</i>      | Ca_Desig_Scaffold09348       | 21173                          | (G/A)       |
| 36969       | CadSNP12564    | <i>Desi</i>      | Ca_Desig_Scaffold09348       | 21184                          | (T/C)       |
| 36970       | CadSNP12565    | <i>Desi</i>      | Ca_Desig_Scaffold09348       | 21203                          | (C/T)       |
| 36971       | CadSNP12566    | <i>Desi</i>      | Ca_Desig_Scaffold09402       | 1526                           | (A/G)       |
| 36972       | CadSNP12567    | <i>Desi</i>      | Ca_Desig_Scaffold09402       | 1543                           | (C/G)       |
| 36973       | CadSNP12568    | <i>Desi</i>      | Ca_Desig_Scaffold09425       | 1934                           | (C/T)       |

| <b>S.N.</b> | <b>SNP IDs</b> | <b>Cultivars</b> | <b>Chromosomes/scaffolds</b> | <b>Physical positions (bp)</b> | <b>SNPs</b> |
|-------------|----------------|------------------|------------------------------|--------------------------------|-------------|
| 36974       | CadSNP12569    | <i>Desi</i>      | Ca_Desig_Scaffold09445       | 190                            | (A/G)       |
| 36975       | CadSNP12570    | <i>Desi</i>      | Ca_Desig_Scaffold09621       | 1607                           | (T/G)       |
| 36976       | CadSNP12571    | <i>Desi</i>      | Ca_Desig_Scaffold09624       | 993                            | (C/A)       |
| 36977       | CadSNP12572    | <i>Desi</i>      | Ca_Desig_Scaffold09624       | 1016                           | (A/T)       |
| 36978       | CadSNP12573    | <i>Desi</i>      | Ca_Desig_Scaffold09624       | 1112                           | (A/G)       |
| 36979       | CadSNP12574    | <i>Desi</i>      | Ca_Desig_Scaffold09624       | 1077                           | (T/C)       |
| 36980       | CadSNP12575    | <i>Desi</i>      | Ca_Desig_Scaffold09624       | 1070                           | (G/C)       |
| 36981       | CadSNP12576    | <i>Desi</i>      | Ca_Desig_Scaffold09624       | 1060                           | (G/A)       |
| 36982       | CadSNP12577    | <i>Desi</i>      | Ca_Desig_Scaffold09624       | 1054                           | (A/G)       |
| 36983       | CadSNP12578    | <i>Desi</i>      | Ca_Desig_Scaffold09624       | 1053                           | (C/T)       |
| 36984       | CadSNP12579    | <i>Desi</i>      | Ca_Desig_Scaffold09641       | 2660                           | (A/T)       |
| 36985       | CadSNP12580    | <i>Desi</i>      | Ca_Desig_Scaffold09641       | 2663                           | (A/G)       |
| 36986       | CadSNP12581    | <i>Desi</i>      | Ca_Desig_Scaffold09641       | 2665                           | (G/A)       |
| 36987       | CadSNP12582    | <i>Desi</i>      | Ca_Desig_Scaffold09641       | 2666                           | (A/G)       |
| 36988       | CadSNP12583    | <i>Desi</i>      | Ca_Desig_Scaffold09641       | 2673                           | (T/A)       |
| 36989       | CadSNP12584    | <i>Desi</i>      | Ca_Desig_Scaffold09641       | 2675                           | (T/G)       |
| 36990       | CadSNP12585    | <i>Desi</i>      | Ca_Desig_Scaffold09641       | 2676                           | (C/G)       |
| 36991       | CadSNP12586    | <i>Desi</i>      | Ca_Desig_Scaffold09641       | 2685                           | (A/T)       |
| 36992       | CadSNP12587    | <i>Desi</i>      | Ca_Desig_Scaffold09641       | 2705                           | (C/T)       |
| 36993       | CadSNP12588    | <i>Desi</i>      | Ca_Desig_Scaffold09641       | 2726                           | (C/A)       |
| 36994       | CadSNP12589    | <i>Desi</i>      | Ca_Desig_Scaffold09641       | 2727                           | (G/T)       |
| 36995       | CadSNP12590    | <i>Desi</i>      | Ca_Desig_Scaffold09641       | 2729                           | (A/T)       |
| 36996       | CadSNP12591    | <i>Desi</i>      | Ca_Desig_Scaffold09641       | 2731                           | (C/A)       |
| 36997       | CadSNP12592    | <i>Desi</i>      | Ca_Desig_Scaffold09641       | 2732                           | (A/T)       |
| 36998       | CadSNP12593    | <i>Desi</i>      | Ca_Desig_Scaffold09641       | 2757                           | (C/T)       |
| 36999       | CadSNP12594    | <i>Desi</i>      | Ca_Desig_Scaffold09699       | 852                            | (C/T)       |
| 37000       | CadSNP12595    | <i>Desi</i>      | Ca_Desig_Scaffold09699       | 857                            | (A/G)       |
| 37001       | CadSNP12596    | <i>Desi</i>      | Ca_Desig_Scaffold09699       | 878                            | (C/T)       |
| 37002       | CadSNP12597    | <i>Desi</i>      | Ca_Desig_Scaffold09699       | 966                            | (G/A)       |
| 37003       | CadSNP12598    | <i>Desi</i>      | Ca_Desig_Scaffold09780       | 1661                           | (A/C)       |
| 37004       | CadSNP12599    | <i>Desi</i>      | Ca_Desig_Scaffold09802       | 1910                           | (A/T)       |
| 37005       | CadSNP12600    | <i>Desi</i>      | Ca_Desig_Scaffold09802       | 1913                           | (C/T)       |
| 37006       | CadSNP12601    | <i>Desi</i>      | Ca_Desig_Scaffold09892       | 17233                          | (A/C)       |
| 37007       | CadSNP12602    | <i>Desi</i>      | Ca_Desig_Scaffold09892       | 56292                          | (C/G)       |
| 37008       | CadSNP12603    | <i>Desi</i>      | Ca_Desig_Scaffold09909       | 4000                           | (T/A)       |
| 37009       | CadSNP12604    | <i>Desi</i>      | Ca_Desig_Scaffold09951       | 412                            | (C/T)       |
| 37010       | CadSNP12605    | <i>Desi</i>      | Ca_Desig_Scaffold09951       | 422                            | (C/A)       |
| 37011       | CadSNP12606    | <i>Desi</i>      | Ca_Desig_Scaffold09951       | 431                            | (A/G)       |



| <b>S.N.</b> | <b>SNP IDs</b> | <b>Cultivars</b> | <b>Chromosomes/scaffolds</b> | <b>Physical positions (bp)</b> | <b>SNPs</b> |
|-------------|----------------|------------------|------------------------------|--------------------------------|-------------|
| 37012       | CadSNP12607    | <i>Desi</i>      | Ca_Desig_Scaffold09951       | 433                            | (T/A)       |
| 37013       | CadSNP12608    | <i>Desi</i>      | Ca_Desig_Scaffold09962       | 701                            | (A/G)       |
| 37014       | CadSNP12609    | <i>Desi</i>      | Ca_Desig_Scaffold09962       | 686                            | (T/A)       |
| 37015       | CadSNP12610    | <i>Desi</i>      | Ca_Desig_Scaffold09962       | 675                            | (C/G)       |
| 37016       | CadSNP12611    | <i>Desi</i>      | Ca_Desig_Scaffold09991       | 1312                           | (G/T)       |
| 37017       | CadSNP12612    | <i>Desi</i>      | Ca_Desig_Scaffold09991       | 1318                           | (G/A)       |
| 37018       | CadSNP12613    | <i>Desi</i>      | Ca_Desig_Scaffold09991       | 1322                           | (A/G)       |
| 37019       | CadSNP12614    | <i>Desi</i>      | Ca_Desig_Scaffold09991       | 1333                           | (C/T)       |
| 37020       | CadSNP12615    | <i>Desi</i>      | Ca_Desig_Scaffold09991       | 1459                           | (C/G)       |
| 37021       | CadSNP12616    | <i>Desi</i>      | Ca_Desig_Scaffold100097      | 108                            | (A/G)       |
| 37022       | CadSNP12617    | <i>Desi</i>      | Ca_Desig_Scaffold100097      | 116                            | (T/C)       |
| 37023       | CadSNP12618    | <i>Desi</i>      | Ca_Desig_Scaffold10015       | 387                            | (C/A)       |
| 37024       | CadSNP12619    | <i>Desi</i>      | Ca_Desig_Scaffold10015       | 390                            | (A/C)       |
| 37025       | CadSNP12620    | <i>Desi</i>      | Ca_Desig_Scaffold10015       | 3796                           | (T/A)       |
| 37026       | CadSNP12621    | <i>Desi</i>      | Ca_Desig_Scaffold100168      | 53                             | (C/T)       |
| 37027       | CadSNP12622    | <i>Desi</i>      | Ca_Desig_Scaffold100176      | 114                            | (C/T)       |
| 37028       | CadSNP12623    | <i>Desi</i>      | Ca_Desig_Scaffold100176      | 103                            | (T/A)       |
| 37029       | CadSNP12624    | <i>Desi</i>      | Ca_Desig_Scaffold100176      | 139                            | (C/T)       |
| 37030       | CadSNP12625    | <i>Desi</i>      | Ca_Desig_Scaffold100176      | 136                            | (A/T)       |
| 37031       | CadSNP12626    | <i>Desi</i>      | Ca_Desig_Scaffold10040       | 3332                           | (C/G)       |
| 37032       | CadSNP12627    | <i>Desi</i>      | Ca_Desig_Scaffold10040       | 3380                           | (G/A)       |
| 37033       | CadSNP12628    | <i>Desi</i>      | Ca_Desig_Scaffold10040       | 3536                           | (C/T)       |
| 37034       | CadSNP12629    | <i>Desi</i>      | Ca_Desig_Scaffold10040       | 3483                           | (G/C)       |
| 37035       | CadSNP12630    | <i>Desi</i>      | Ca_Desig_Scaffold10040       | 3535                           | (G/A)       |
| 37036       | CadSNP12631    | <i>Desi</i>      | Ca_Desig_Scaffold10040       | 3643                           | (C/T)       |
| 37037       | CadSNP12632    | <i>Desi</i>      | Ca_Desig_Scaffold10040       | 3627                           | (T/C)       |
| 37038       | CadSNP12633    | <i>Desi</i>      | Ca_Desig_Scaffold10040       | 3695                           | (C/T)       |
| 37039       | CadSNP12634    | <i>Desi</i>      | Ca_Desig_Scaffold10040       | 3624                           | (A/C)       |
| 37040       | CadSNP12635    | <i>Desi</i>      | Ca_Desig_Scaffold10040       | 3621                           | (C/T)       |
| 37041       | CadSNP12636    | <i>Desi</i>      | Ca_Desig_Scaffold10040       | 3713                           | (G/T)       |
| 37042       | CadSNP12637    | <i>Desi</i>      | Ca_Desig_Scaffold10040       | 3714                           | (T/C)       |
| 37043       | CadSNP12638    | <i>Desi</i>      | Ca_Desig_Scaffold10040       | 3746                           | (G/T)       |
| 37044       | CadSNP12639    | <i>Desi</i>      | Ca_Desig_Scaffold100476      | 269                            | (C/T)       |
| 37045       | CadSNP12640    | <i>Desi</i>      | Ca_Desig_Scaffold100476      | 272                            | (G/A)       |
| 37046       | CadSNP12641    | <i>Desi</i>      | Ca_Desig_Scaffold10069       | 2142                           | (A/C)       |
| 37047       | CadSNP12642    | <i>Desi</i>      | Ca_Desig_Scaffold10069       | 2283                           | (C/T)       |
| 37048       | CadSNP12643    | <i>Desi</i>      | Ca_Desig_Scaffold10069       | 2279                           | (C/T)       |
| 37049       | CadSNP12644    | <i>Desi</i>      | Ca_Desig_Scaffold10069       | 2273                           | (A/C)       |

| <b>S.N.</b> | <b>SNP IDs</b> | <b>Cultivars</b> | <b>Chromosomes/scaffolds</b> | <b>Physical positions (bp)</b> | <b>SNPs</b> |
|-------------|----------------|------------------|------------------------------|--------------------------------|-------------|
| 37050       | CadSNP12645    | <i>Desi</i>      | Ca_Desig_Scaffold10069       | 2266                           | (A/C)       |
| 37051       | CadSNP12646    | <i>Desi</i>      | Ca_Desig_Scaffold10069       | 2263                           | (A/C)       |
| 37052       | CadSNP12647    | <i>Desi</i>      | Ca_Desig_Scaffold10083       | 3774                           | (T/C)       |
| 37053       | CadSNP12648    | <i>Desi</i>      | Ca_Desig_Scaffold10083       | 3720                           | (T/A)       |
| 37054       | CadSNP12649    | <i>Desi</i>      | Ca_Desig_Scaffold10083       | 4934                           | (T/C)       |
| 37055       | CadSNP12650    | <i>Desi</i>      | Ca_Desig_Scaffold10083       | 4938                           | (T/A)       |
| 37056       | CadSNP12651    | <i>Desi</i>      | Ca_Desig_Scaffold10083       | 4966                           | (G/T)       |
| 37057       | CadSNP12652    | <i>Desi</i>      | Ca_Desig_Scaffold100990      | 255                            | (G/A)       |
| 37058       | CadSNP12653    | <i>Desi</i>      | Ca_Desig_Scaffold100990      | 258                            | (G/A)       |
| 37059       | CadSNP12654    | <i>Desi</i>      | Ca_Desig_Scaffold100990      | 314                            | (A/T)       |
| 37060       | CadSNP12655    | <i>Desi</i>      | Ca_Desig_Scaffold10109       | 909                            | (C/G)       |
| 37061       | CadSNP12656    | <i>Desi</i>      | Ca_Desig_Scaffold10127       | 839                            | (C/T)       |
| 37062       | CadSNP12657    | <i>Desi</i>      | Ca_Desig_Scaffold10127       | 1109                           | (T/C)       |
| 37063       | CadSNP12658    | <i>Desi</i>      | Ca_Desig_Scaffold10127       | 1150                           | (A/G)       |
| 37064       | CadSNP12659    | <i>Desi</i>      | Ca_Desig_Scaffold10127       | 1198                           | (A/T)       |
| 37065       | CadSNP12660    | <i>Desi</i>      | Ca_Desig_Scaffold10127       | 1181                           | (C/A)       |
| 37066       | CadSNP12661    | <i>Desi</i>      | Ca_Desig_Scaffold10127       | 3926                           | (C/G)       |
| 37067       | CadSNP12662    | <i>Desi</i>      | Ca_Desig_Scaffold10127       | 3918                           | (C/T)       |
| 37068       | CadSNP12663    | <i>Desi</i>      | Ca_Desig_Scaffold10127       | 3878                           | (G/C)       |
| 37069       | CadSNP12664    | <i>Desi</i>      | Ca_Desig_Scaffold101318      | 144                            | (G/T)       |
| 37070       | CadSNP12665    | <i>Desi</i>      | Ca_Desig_Scaffold101318      | 145                            | (G/T)       |
| 37071       | CadSNP12666    | <i>Desi</i>      | Ca_Desig_Scaffold101833      | 291                            | (C/A)       |
| 37072       | CadSNP12667    | <i>Desi</i>      | Ca_Desig_Scaffold101833      | 263                            | (T/A)       |
| 37073       | CadSNP12668    | <i>Desi</i>      | Ca_Desig_Scaffold101833      | 238                            | (C/T)       |
| 37074       | CadSNP12669    | <i>Desi</i>      | Ca_Desig_Scaffold10187       | 2417                           | (A/T)       |
| 37075       | CadSNP12670    | <i>Desi</i>      | Ca_Desig_Scaffold10187       | 2460                           | (A/T)       |
| 37076       | CadSNP12671    | <i>Desi</i>      | Ca_Desig_Scaffold10195       | 344                            | (A/T)       |
| 37077       | CadSNP12672    | <i>Desi</i>      | Ca_Desig_Scaffold102084      | 56                             | (A/T)       |
| 37078       | CadSNP12673    | <i>Desi</i>      | Ca_Desig_Scaffold102084      | 152                            | (T/G)       |
| 37079       | CadSNP12674    | <i>Desi</i>      | Ca_Desig_Scaffold102084      | 112                            | (C/A)       |
| 37080       | CadSNP12675    | <i>Desi</i>      | Ca_Desig_Scaffold102084      | 98                             | (T/C)       |
| 37081       | CadSNP12676    | <i>Desi</i>      | Ca_Desig_Scaffold102122      | 230                            | (C/T)       |
| 37082       | CadSNP12677    | <i>Desi</i>      | Ca_Desig_Scaffold102122      | 307                            | (C/T)       |
| 37083       | CadSNP12678    | <i>Desi</i>      | Ca_Desig_Scaffold10228       | 3405                           | (T/A)       |
| 37084       | CadSNP12679    | <i>Desi</i>      | Ca_Desig_Scaffold10235       | 184                            | (A/G)       |
| 37085       | CadSNP12680    | <i>Desi</i>      | Ca_Desig_Scaffold10235       | 148                            | (T/A)       |
| 37086       | CadSNP12681    | <i>Desi</i>      | Ca_Desig_Scaffold102938      | 67                             | (G/T)       |
| 37087       | CadSNP12682    | <i>Desi</i>      | Ca_Desig_Scaffold102938      | 84                             | (G/A)       |

| <b>S.N.</b> | <b>SNP IDs</b> | <b>Cultivars</b> | <b>Chromosomes/scaffolds</b> | <b>Physical positions (bp)</b> | <b>SNPs</b> |
|-------------|----------------|------------------|------------------------------|--------------------------------|-------------|
| 37088       | CadSNP12683    | <i>Desi</i>      | Ca_Desig_Scaffold10300       | 4074                           | (C/T)       |
| 37089       | CadSNP12684    | <i>Desi</i>      | Ca_Desig_Scaffold10354       | 692                            | (G/A)       |
| 37090       | CadSNP12685    | <i>Desi</i>      | Ca_Desig_Scaffold103635      | 34                             | (G/C)       |
| 37091       | CadSNP12686    | <i>Desi</i>      | Ca_Desig_Scaffold103635      | 36                             | (C/A)       |
| 37092       | CadSNP12687    | <i>Desi</i>      | Ca_Desig_Scaffold103635      | 39                             | (C/T)       |
| 37093       | CadSNP12688    | <i>Desi</i>      | Ca_Desig_Scaffold103635      | 41                             | (C/T)       |
| 37094       | CadSNP12689    | <i>Desi</i>      | Ca_Desig_Scaffold103635      | 35                             | (G/C)       |
| 37095       | CadSNP12690    | <i>Desi</i>      | Ca_Desig_Scaffold103638      | 232                            | (T/C)       |
| 37096       | CadSNP12691    | <i>Desi</i>      | Ca_Desig_Scaffold103638      | 214                            | (C/T)       |
| 37097       | CadSNP12692    | <i>Desi</i>      | Ca_Desig_Scaffold10366       | 356                            | (T/C)       |
| 37098       | CadSNP12693    | <i>Desi</i>      | Ca_Desig_Scaffold10388       | 410                            | (T/A)       |
| 37099       | CadSNP12694    | <i>Desi</i>      | Ca_Desig_Scaffold10388       | 1019                           | (T/A)       |
| 37100       | CadSNP12695    | <i>Desi</i>      | Ca_Desig_Scaffold10392       | 4001                           | (A/T)       |
| 37101       | CadSNP12696    | <i>Desi</i>      | Ca_Desig_Scaffold10392       | 4035                           | (T/G)       |
| 37102       | CadSNP12697    | <i>Desi</i>      | Ca_Desig_Scaffold10419       | 1084                           | (G/C)       |
| 37103       | CadSNP12698    | <i>Desi</i>      | Ca_Desig_Scaffold104723      | 176                            | (T/C)       |
| 37104       | CadSNP12699    | <i>Desi</i>      | Ca_Desig_Scaffold104723      | 188                            | (C/A)       |
| 37105       | CadSNP12700    | <i>Desi</i>      | Ca_Desig_Scaffold104723      | 198                            | (G/T)       |
| 37106       | CadSNP12701    | <i>Desi</i>      | Ca_Desig_Scaffold104723      | 225                            | (T/C)       |
| 37107       | CadSNP12702    | <i>Desi</i>      | Ca_Desig_Scaffold104723      | 235                            | (C/T)       |
| 37108       | CadSNP12703    | <i>Desi</i>      | Ca_Desig_Scaffold104723      | 256                            | (G/T)       |
| 37109       | CadSNP12704    | <i>Desi</i>      | Ca_Desig_Scaffold104723      | 261                            | (C/T)       |
| 37110       | CadSNP12705    | <i>Desi</i>      | Ca_Desig_Scaffold104723      | 274                            | (A/T)       |
| 37111       | CadSNP12706    | <i>Desi</i>      | Ca_Desig_Scaffold104723      | 283                            | (C/T)       |
| 37112       | CadSNP12707    | <i>Desi</i>      | Ca_Desig_Scaffold104779      | 62                             | (C/T)       |
| 37113       | CadSNP12708    | <i>Desi</i>      | Ca_Desig_Scaffold10503       | 3164                           | (G/C)       |
| 37114       | CadSNP12709    | <i>Desi</i>      | Ca_Desig_Scaffold105070      | 304                            | (C/T)       |
| 37115       | CadSNP12710    | <i>Desi</i>      | Ca_Desig_Scaffold10546       | 4141                           | (C/T)       |
| 37116       | CadSNP12711    | <i>Desi</i>      | Ca_Desig_Scaffold10567       | 2578                           | (A/G)       |
| 37117       | CadSNP12712    | <i>Desi</i>      | Ca_Desig_Scaffold10567       | 2602                           | (C/T)       |
| 37118       | CadSNP12713    | <i>Desi</i>      | Ca_Desig_Scaffold10576       | 3757                           | (G/T)       |
| 37119       | CadSNP12714    | <i>Desi</i>      | Ca_Desig_Scaffold10576       | 3761                           | (G/C)       |
| 37120       | CadSNP12715    | <i>Desi</i>      | Ca_Desig_Scaffold10576       | 3782                           | (G/T)       |
| 37121       | CadSNP12716    | <i>Desi</i>      | Ca_Desig_Scaffold10576       | 3801                           | (G/A)       |
| 37122       | CadSNP12717    | <i>Desi</i>      | Ca_Desig_Scaffold10576       | 3811                           | (G/A)       |
| 37123       | CadSNP12718    | <i>Desi</i>      | Ca_Desig_Scaffold10604       | 657                            | (C/T)       |
| 37124       | CadSNP12719    | <i>Desi</i>      | Ca_Desig_Scaffold10652       | 3024                           | (G/A)       |
| 37125       | CadSNP12720    | <i>Desi</i>      | Ca_Desig_Scaffold10706       | 4502                           | (T/C)       |

| <b>S.N.</b> | <b>SNP IDs</b> | <b>Cultivars</b> | <b>Chromosomes/scaffolds</b> | <b>Physical positions (bp)</b> | <b>SNPs</b> |
|-------------|----------------|------------------|------------------------------|--------------------------------|-------------|
| 37126       | CadSNP12721    | <i>Desi</i>      | Ca_Desig_Scaffold107303      | 345                            | (T/C)       |
| 37127       | CadSNP12722    | <i>Desi</i>      | Ca_Desig_Scaffold107303      | 275                            | (T/A)       |
| 37128       | CadSNP12723    | <i>Desi</i>      | Ca_Desig_Scaffold10731       | 1257                           | (C/T)       |
| 37129       | CadSNP12724    | <i>Desi</i>      | Ca_Desig_Scaffold10732       | 376                            | (G/A)       |
| 37130       | CadSNP12725    | <i>Desi</i>      | Ca_Desig_Scaffold10732       | 424                            | (A/C)       |
| 37131       | CadSNP12726    | <i>Desi</i>      | Ca_Desig_Scaffold107521      | 132                            | (G/T)       |
| 37132       | CadSNP12727    | <i>Desi</i>      | Ca_Desig_Scaffold107521      | 143                            | (C/G)       |
| 37133       | CadSNP12728    | <i>Desi</i>      | Ca_Desig_Scaffold107521      | 166                            | (C/T)       |
| 37134       | CadSNP12729    | <i>Desi</i>      | Ca_Desig_Scaffold107521      | 203                            | (C/T)       |
| 37135       | CadSNP12730    | <i>Desi</i>      | Ca_Desig_Scaffold107521      | 208                            | (G/C)       |
| 37136       | CadSNP12731    | <i>Desi</i>      | Ca_Desig_Scaffold107521      | 206                            | (G/A)       |
| 37137       | CadSNP12732    | <i>Desi</i>      | Ca_Desig_Scaffold107867      | 86                             | (T/A)       |
| 37138       | CadSNP12733    | <i>Desi</i>      | Ca_Desig_Scaffold107867      | 82                             | (C/T)       |
| 37139       | CadSNP12734    | <i>Desi</i>      | Ca_Desig_Scaffold107867      | 99                             | (G/T)       |
| 37140       | CadSNP12735    | <i>Desi</i>      | Ca_Desig_Scaffold107867      | 109                            | (C/A)       |
| 37141       | CadSNP12736    | <i>Desi</i>      | Ca_Desig_Scaffold107867      | 130                            | (C/T)       |
| 37142       | CadSNP12737    | <i>Desi</i>      | Ca_Desig_Scaffold107867      | 209                            | (A/G)       |
| 37143       | CadSNP12738    | <i>Desi</i>      | Ca_Desig_Scaffold107867      | 159                            | (A/T)       |
| 37144       | CadSNP12739    | <i>Desi</i>      | Ca_Desig_Scaffold10817       | 123                            | (T/A)       |
| 37145       | CadSNP12740    | <i>Desi</i>      | Ca_Desig_Scaffold10817       | 122                            | (C/T)       |
| 37146       | CadSNP12741    | <i>Desi</i>      | Ca_Desig_Scaffold10817       | 192                            | (G/A)       |
| 37147       | CadSNP12742    | <i>Desi</i>      | Ca_Desig_Scaffold10819       | 2162                           | (T/G)       |
| 37148       | CadSNP12743    | <i>Desi</i>      | Ca_Desig_Scaffold10819       | 4136                           | (C/A)       |
| 37149       | CadSNP12744    | <i>Desi</i>      | Ca_Desig_Scaffold10819       | 4172                           | (T/C)       |
| 37150       | CadSNP12745    | <i>Desi</i>      | Ca_Desig_Scaffold10819       | 4257                           | (G/A)       |
| 37151       | CadSNP12746    | <i>Desi</i>      | Ca_Desig_Scaffold10819       | 4240                           | (A/G)       |
| 37152       | CadSNP12747    | <i>Desi</i>      | Ca_Desig_Scaffold10819       | 4226                           | (T/C)       |
| 37153       | CadSNP12748    | <i>Desi</i>      | Ca_Desig_Scaffold10834       | 3548                           | (A/G)       |
| 37154       | CadSNP12749    | <i>Desi</i>      | Ca_Desig_Scaffold10834       | 3546                           | (A/G)       |
| 37155       | CadSNP12750    | <i>Desi</i>      | Ca_Desig_Scaffold10834       | 3529                           | (C/T)       |
| 37156       | CadSNP12751    | <i>Desi</i>      | Ca_Desig_Scaffold10834       | 3513                           | (G/A)       |
| 37157       | CadSNP12752    | <i>Desi</i>      | Ca_Desig_Scaffold10836       | 3350                           | (C/A)       |
| 37158       | CadSNP12753    | <i>Desi</i>      | Ca_Desig_Scaffold10836       | 3351                           | (T/G)       |
| 37159       | CadSNP12754    | <i>Desi</i>      | Ca_Desig_Scaffold10836       | 3354                           | (C/T)       |
| 37160       | CadSNP12755    | <i>Desi</i>      | Ca_Desig_Scaffold10861       | 4080                           | (C/A)       |
| 37161       | CadSNP12756    | <i>Desi</i>      | Ca_Desig_Scaffold10866       | 1157                           | (C/A)       |
| 37162       | CadSNP12757    | <i>Desi</i>      | Ca_Desig_Scaffold10866       | 3659                           | (A/C)       |
| 37163       | CadSNP12758    | <i>Desi</i>      | Ca_Desig_Scaffold10921       | 3527                           | (C/A)       |

| <b>S.N.</b> | <b>SNP IDs</b> | <b>Cultivars</b> | <b>Chromosomes/scaffolds</b> | <b>Physical positions (bp)</b> | <b>SNPs</b> |
|-------------|----------------|------------------|------------------------------|--------------------------------|-------------|
| 37164       | CadSNP12759    | <i>Desi</i>      | Ca_Desig_Scaffold10921       | 3542                           | (C/T)       |
| 37165       | CadSNP12760    | <i>Desi</i>      | Ca_Desig_Scaffold10921       | 3575                           | (G/T)       |
| 37166       | CadSNP12761    | <i>Desi</i>      | Ca_Desig_Scaffold109321      | 61                             | (A/C)       |
| 37167       | CadSNP12762    | <i>Desi</i>      | Ca_Desig_Scaffold109321      | 83                             | (C/T)       |
| 37168       | CadSNP12763    | <i>Desi</i>      | Ca_Desig_Scaffold109321      | 126                            | (C/T)       |
| 37169       | CadSNP12764    | <i>Desi</i>      | Ca_Desig_Scaffold109321      | 131                            | (C/T)       |
| 37170       | CadSNP12765    | <i>Desi</i>      | Ca_Desig_Scaffold109710      | 278                            | (T/C)       |
| 37171       | CadSNP12766    | <i>Desi</i>      | Ca_Desig_Scaffold109710      | 296                            | (T/G)       |
| 37172       | CadSNP12767    | <i>Desi</i>      | Ca_Desig_Scaffold109710      | 299                            | (G/A)       |
| 37173       | CadSNP12768    | <i>Desi</i>      | Ca_Desig_Scaffold109852      | 125                            | (G/A)       |
| 37174       | CadSNP12769    | <i>Desi</i>      | Ca_Desig_Scaffold109859      | 301                            | (C/T)       |
| 37175       | CadSNP12770    | <i>Desi</i>      | Ca_Desig_Scaffold109859      | 254                            | (C/A)       |
| 37176       | CadSNP12771    | <i>Desi</i>      | Ca_Desig_Scaffold109859      | 228                            | (C/T)       |
| 37177       | CadSNP12772    | <i>Desi</i>      | Ca_Desig_Scaffold109859      | 233                            | (G/C)       |
| 37178       | CadSNP12773    | <i>Desi</i>      | Ca_Desig_Scaffold109859      | 264                            | (G/A)       |
| 37179       | CadSNP12774    | <i>Desi</i>      | Ca_Desig_Scaffold109863      | 204                            | (G/A)       |
| 37180       | CadSNP12775    | <i>Desi</i>      | Ca_Desig_Scaffold109863      | 242                            | (C/A)       |
| 37181       | CadSNP12776    | <i>Desi</i>      | Ca_Desig_Scaffold10990       | 36625                          | (T/G)       |
| 37182       | CadSNP12777    | <i>Desi</i>      | Ca_Desig_Scaffold110072      | 236                            | (A/G)       |
| 37183       | CadSNP12778    | <i>Desi</i>      | Ca_Desig_Scaffold110072      | 306                            | (G/T)       |
| 37184       | CadSNP12779    | <i>Desi</i>      | Ca_Desig_Scaffold110072      | 293                            | (G/A)       |
| 37185       | CadSNP12780    | <i>Desi</i>      | Ca_Desig_Scaffold110072      | 248                            | (G/T)       |
| 37186       | CadSNP12781    | <i>Desi</i>      | Ca_Desig_Scaffold11013       | 46                             | (A/G)       |
| 37187       | CadSNP12782    | <i>Desi</i>      | Ca_Desig_Scaffold110206      | 241                            | (C/T)       |
| 37188       | CadSNP12783    | <i>Desi</i>      | Ca_Desig_Scaffold110206      | 257                            | (T/C)       |
| 37189       | CadSNP12784    | <i>Desi</i>      | Ca_Desig_Scaffold110257      | 259                            | (A/C)       |
| 37190       | CadSNP12785    | <i>Desi</i>      | Ca_Desig_Scaffold110257      | 287                            | (T/C)       |
| 37191       | CadSNP12786    | <i>Desi</i>      | Ca_Desig_Scaffold110257      | 302                            | (A/G)       |
| 37192       | CadSNP12787    | <i>Desi</i>      | Ca_Desig_Scaffold11114       | 231                            | (G/A)       |
| 37193       | CadSNP12788    | <i>Desi</i>      | Ca_Desig_Scaffold11130       | 101                            | (G/A)       |
| 37194       | CadSNP12789    | <i>Desi</i>      | Ca_Desig_Scaffold11130       | 169                            | (G/A)       |
| 37195       | CadSNP12790    | <i>Desi</i>      | Ca_Desig_Scaffold11130       | 127                            | (G/T)       |
| 37196       | CadSNP12791    | <i>Desi</i>      | Ca_Desig_Scaffold111434      | 154                            | (A/T)       |
| 37197       | CadSNP12792    | <i>Desi</i>      | Ca_Desig_Scaffold111434      | 180                            | (G/A)       |
| 37198       | CadSNP12793    | <i>Desi</i>      | Ca_Desig_Scaffold11144       | 33970                          | (A/G)       |
| 37199       | CadSNP12794    | <i>Desi</i>      | Ca_Desig_Scaffold11144       | 33988                          | (T/C)       |
| 37200       | CadSNP12795    | <i>Desi</i>      | Ca_Desig_Scaffold11144       | 33990                          | (T/C)       |
| 37201       | CadSNP12796    | <i>Desi</i>      | Ca_Desig_Scaffold11144       | 57431                          | (T/G)       |

| <b>S.N.</b> | <b>SNP IDs</b> | <b>Cultivars</b> | <b>Chromosomes/scaffolds</b> | <b>Physical positions (bp)</b> | <b>SNPs</b> |
|-------------|----------------|------------------|------------------------------|--------------------------------|-------------|
| 37202       | CadSNP12797    | <i>Desi</i>      | Ca_Desig_Scaffold11144       | 57713                          | (T/A)       |
| 37203       | CadSNP12798    | <i>Desi</i>      | Ca_Desig_Scaffold11144       | 180066                         | (G/C)       |
| 37204       | CadSNP12799    | <i>Desi</i>      | Ca_Desig_Scaffold11160       | 3050                           | (C/T)       |
| 37205       | CadSNP12800    | <i>Desi</i>      | Ca_Desig_Scaffold11160       | 3085                           | (C/A)       |
| 37206       | CadSNP12801    | <i>Desi</i>      | Ca_Desig_Scaffold111990      | 172                            | (G/T)       |
| 37207       | CadSNP12802    | <i>Desi</i>      | Ca_Desig_Scaffold11230       | 484                            | (C/G)       |
| 37208       | CadSNP12803    | <i>Desi</i>      | Ca_Desig_Scaffold11230       | 485                            | (C/T)       |
| 37209       | CadSNP12804    | <i>Desi</i>      | Ca_Desig_Scaffold11230       | 515                            | (G/C)       |
| 37210       | CadSNP12805    | <i>Desi</i>      | Ca_Desig_Scaffold11230       | 1578                           | (T/G)       |
| 37211       | CadSNP12806    | <i>Desi</i>      | Ca_Desig_Scaffold11230       | 1633                           | (T/A)       |
| 37212       | CadSNP12807    | <i>Desi</i>      | Ca_Desig_Scaffold11230       | 3250                           | (C/T)       |
| 37213       | CadSNP12808    | <i>Desi</i>      | Ca_Desig_Scaffold112470      | 273                            | (G/A)       |
| 37214       | CadSNP12809    | <i>Desi</i>      | Ca_Desig_Scaffold112470      | 243                            | (T/A)       |
| 37215       | CadSNP12810    | <i>Desi</i>      | Ca_Desig_Scaffold11274       | 2781                           | (T/C)       |
| 37216       | CadSNP12811    | <i>Desi</i>      | Ca_Desig_Scaffold11274       | 2798                           | (G/T)       |
| 37217       | CadSNP12812    | <i>Desi</i>      | Ca_Desig_Scaffold11274       | 2953                           | (C/T)       |
| 37218       | CadSNP12813    | <i>Desi</i>      | Ca_Desig_Scaffold11289       | 3996                           | (A/G)       |
| 37219       | CadSNP12814    | <i>Desi</i>      | Ca_Desig_Scaffold11289       | 3990                           | (C/T)       |
| 37220       | CadSNP12815    | <i>Desi</i>      | Ca_Desig_Scaffold113028      | 117                            | (T/C)       |
| 37221       | CadSNP12816    | <i>Desi</i>      | Ca_Desig_Scaffold113028      | 179                            | (G/C)       |
| 37222       | CadSNP12817    | <i>Desi</i>      | Ca_Desig_Scaffold113166      | 91                             | (T/A)       |
| 37223       | CadSNP12818    | <i>Desi</i>      | Ca_Desig_Scaffold113166      | 93                             | (T/A)       |
| 37224       | CadSNP12819    | <i>Desi</i>      | Ca_Desig_Scaffold113166      | 104                            | (C/T)       |
| 37225       | CadSNP12820    | <i>Desi</i>      | Ca_Desig_Scaffold113166      | 142                            | (C/T)       |
| 37226       | CadSNP12821    | <i>Desi</i>      | Ca_Desig_Scaffold11336       | 4234                           | (T/C)       |
| 37227       | CadSNP12822    | <i>Desi</i>      | Ca_Desig_Scaffold11373       | 929                            | (C/T)       |
| 37228       | CadSNP12823    | <i>Desi</i>      | Ca_Desig_Scaffold11373       | 1353                           | (C/G)       |
| 37229       | CadSNP12824    | <i>Desi</i>      | Ca_Desig_Scaffold11414       | 1560                           | (C/G)       |
| 37230       | CadSNP12825    | <i>Desi</i>      | Ca_Desig_Scaffold11414       | 1676                           | (T/G)       |
| 37231       | CadSNP12826    | <i>Desi</i>      | Ca_Desig_Scaffold11418       | 205                            | (A/G)       |
| 37232       | CadSNP12827    | <i>Desi</i>      | Ca_Desig_Scaffold11418       | 292                            | (C/T)       |
| 37233       | CadSNP12828    | <i>Desi</i>      | Ca_Desig_Scaffold11428       | 3555                           | (A/C)       |
| 37234       | CadSNP12829    | <i>Desi</i>      | Ca_Desig_Scaffold114876      | 44                             | (T/A)       |
| 37235       | CadSNP12830    | <i>Desi</i>      | Ca_Desig_Scaffold114876      | 43                             | (C/A)       |
| 37236       | CadSNP12831    | <i>Desi</i>      | Ca_Desig_Scaffold114899      | 140                            | (T/C)       |
| 37237       | CadSNP12832    | <i>Desi</i>      | Ca_Desig_Scaffold115107      | 37                             | (C/T)       |
| 37238       | CadSNP12833    | <i>Desi</i>      | Ca_Desig_Scaffold115107      | 187                            | (C/A)       |
| 37239       | CadSNP12834    | <i>Desi</i>      | Ca_Desig_Scaffold115107      | 260                            | (T/A)       |

| <b>S.N.</b> | <b>SNP IDs</b> | <b>Cultivars</b> | <b>Chromosomes/scaffolds</b> | <b>Physical positions (bp)</b> | <b>SNPs</b> |
|-------------|----------------|------------------|------------------------------|--------------------------------|-------------|
| 37240       | CadSNP12835    | <i>Desi</i>      | Ca_Desig_Scaffold115107      | 321                            | (T/C)       |
| 37241       | CadSNP12836    | <i>Desi</i>      | Ca_Desig_Scaffold11589       | 967                            | (T/G)       |
| 37242       | CadSNP12837    | <i>Desi</i>      | Ca_Desig_Scaffold116071      | 310                            | (G/T)       |
| 37243       | CadSNP12838    | <i>Desi</i>      | Ca_Desig_Scaffold11628       | 2521                           | (T/G)       |
| 37244       | CadSNP12839    | <i>Desi</i>      | Ca_Desig_Scaffold116326      | 45                             | (G/A)       |
| 37245       | CadSNP12840    | <i>Desi</i>      | Ca_Desig_Scaffold116326      | 115                            | (C/A)       |
| 37246       | CadSNP12841    | <i>Desi</i>      | Ca_Desig_Scaffold116326      | 107                            | (A/G)       |
| 37247       | CadSNP12842    | <i>Desi</i>      | Ca_Desig_Scaffold116326      | 66                             | (C/T)       |
| 37248       | CadSNP12843    | <i>Desi</i>      | Ca_Desig_Scaffold116326      | 59                             | (C/T)       |
| 37249       | CadSNP12844    | <i>Desi</i>      | Ca_Desig_Scaffold116326      | 48                             | (G/A)       |
| 37250       | CadSNP12845    | <i>Desi</i>      | Ca_Desig_Scaffold11649       | 1666                           | (C/A)       |
| 37251       | CadSNP12846    | <i>Desi</i>      | Ca_Desig_Scaffold11652       | 219                            | (T/C)       |
| 37252       | CadSNP12847    | <i>Desi</i>      | Ca_Desig_Scaffold11652       | 290                            | (G/C)       |
| 37253       | CadSNP12848    | <i>Desi</i>      | Ca_Desig_Scaffold116539      | 178                            | (C/G)       |
| 37254       | CadSNP12849    | <i>Desi</i>      | Ca_Desig_Scaffold116737      | 150                            | (G/A)       |
| 37255       | CadSNP12850    | <i>Desi</i>      | Ca_Desig_Scaffold116737      | 177                            | (T/G)       |
| 37256       | CadSNP12851    | <i>Desi</i>      | Ca_Desig_Scaffold11697       | 247                            | (A/C)       |
| 37257       | CadSNP12852    | <i>Desi</i>      | Ca_Desig_Scaffold117047      | 284                            | (T/C)       |
| 37258       | CadSNP12853    | <i>Desi</i>      | Ca_Desig_Scaffold11707       | 3883                           | (T/G)       |
| 37259       | CadSNP12854    | <i>Desi</i>      | Ca_Desig_Scaffold11707       | 3891                           | (C/A)       |
| 37260       | CadSNP12855    | <i>Desi</i>      | Ca_Desig_Scaffold11707       | 3897                           | (G/A)       |
| 37261       | CadSNP12856    | <i>Desi</i>      | Ca_Desig_Scaffold11707       | 4015                           | (T/C)       |
| 37262       | CadSNP12857    | <i>Desi</i>      | Ca_Desig_Scaffold11707       | 3963                           | (C/G)       |
| 37263       | CadSNP12858    | <i>Desi</i>      | Ca_Desig_Scaffold11711       | 1694                           | (A/C)       |
| 37264       | CadSNP12859    | <i>Desi</i>      | Ca_Desig_Scaffold117181      | 271                            | (T/C)       |
| 37265       | CadSNP12860    | <i>Desi</i>      | Ca_Desig_Scaffold11732       | 681                            | (T/A)       |
| 37266       | CadSNP12861    | <i>Desi</i>      | Ca_Desig_Scaffold11732       | 685                            | (C/A)       |
| 37267       | CadSNP12862    | <i>Desi</i>      | Ca_Desig_Scaffold11732       | 688                            | (C/A)       |
| 37268       | CadSNP12863    | <i>Desi</i>      | Ca_Desig_Scaffold118324      | 221                            | (T/G)       |
| 37269       | CadSNP12864    | <i>Desi</i>      | Ca_Desig_Scaffold118437      | 246                            | (G/A)       |
| 37270       | CadSNP12865    | <i>Desi</i>      | Ca_Desig_Scaffold11853       | 1604                           | (A/G)       |
| 37271       | CadSNP12866    | <i>Desi</i>      | Ca_Desig_Scaffold118660      | 189                            | (C/T)       |
| 37272       | CadSNP12867    | <i>Desi</i>      | Ca_Desig_Scaffold11869       | 71                             | (A/G)       |
| 37273       | CadSNP12868    | <i>Desi</i>      | Ca_Desig_Scaffold11869       | 297                            | (C/G)       |
| 37274       | CadSNP12869    | <i>Desi</i>      | Ca_Desig_Scaffold11869       | 2622                           | (A/G)       |
| 37275       | CadSNP12870    | <i>Desi</i>      | Ca_Desig_Scaffold118823      | 60                             | (T/C)       |
| 37276       | CadSNP12871    | <i>Desi</i>      | Ca_Desig_Scaffold11886       | 3371                           | (C/T)       |
| 37277       | CadSNP12872    | <i>Desi</i>      | Ca_Desig_Scaffold11886       | 3401                           | (A/T)       |

| <b>S.N.</b> | <b>SNP IDs</b> | <b>Cultivars</b> | <b>Chromosomes/scaffolds</b> | <b>Physical positions (bp)</b> | <b>SNPs</b> |
|-------------|----------------|------------------|------------------------------|--------------------------------|-------------|
| 37278       | CadSNP12873    | <i>Desi</i>      | Ca_Desig_Scaffold118878      | 217                            | (G/A)       |
| 37279       | CadSNP12874    | <i>Desi</i>      | Ca_Desig_Scaffold119061      | 54                             | (G/A)       |
| 37280       | CadSNP12875    | <i>Desi</i>      | Ca_Desig_Scaffold119240      | 105                            | (A/C)       |
| 37281       | CadSNP12876    | <i>Desi</i>      | Ca_Desig_Scaffold119240      | 201                            | (A/G)       |
| 37282       | CadSNP12877    | <i>Desi</i>      | Ca_Desig_Scaffold11937       | 3368                           | (C/T)       |
| 37283       | CadSNP12878    | <i>Desi</i>      | Ca_Desig_Scaffold11937       | 3449                           | (A/C)       |
| 37284       | CadSNP12879    | <i>Desi</i>      | Ca_Desig_Scaffold11956       | 102                            | (A/G)       |
| 37285       | CadSNP12880    | <i>Desi</i>      | Ca_Desig_Scaffold11965       | 2020                           | (A/C)       |
| 37286       | CadSNP12881    | <i>Desi</i>      | Ca_Desig_Scaffold120057      | 77                             | (T/C)       |
| 37287       | CadSNP12882    | <i>Desi</i>      | Ca_Desig_Scaffold120057      | 90                             | (G/A)       |
| 37288       | CadSNP12883    | <i>Desi</i>      | Ca_Desig_Scaffold12017       | 3551                           | (T/C)       |
| 37289       | CadSNP12884    | <i>Desi</i>      | Ca_Desig_Scaffold12017       | 3557                           | (A/G)       |
| 37290       | CadSNP12885    | <i>Desi</i>      | Ca_Desig_Scaffold12017       | 3570                           | (A/G)       |
| 37291       | CadSNP12886    | <i>Desi</i>      | Ca_Desig_Scaffold12017       | 3603                           | (A/G)       |
| 37292       | CadSNP12887    | <i>Desi</i>      | Ca_Desig_Scaffold12023       | 1889                           | (G/A)       |
| 37293       | CadSNP12888    | <i>Desi</i>      | Ca_Desig_Scaffold12023       | 2134                           | (T/A)       |
| 37294       | CadSNP12889    | <i>Desi</i>      | Ca_Desig_Scaffold12023       | 2140                           | (A/G)       |
| 37295       | CadSNP12890    | <i>Desi</i>      | Ca_Desig_Scaffold12023       | 2141                           | (A/T)       |
| 37296       | CadSNP12891    | <i>Desi</i>      | Ca_Desig_Scaffold12023       | 2143                           | (G/C)       |
| 37297       | CadSNP12892    | <i>Desi</i>      | Ca_Desig_Scaffold12023       | 2144                           | (A/T)       |
| 37298       | CadSNP12893    | <i>Desi</i>      | Ca_Desig_Scaffold12023       | 2145                           | (C/G)       |
| 37299       | CadSNP12894    | <i>Desi</i>      | Ca_Desig_Scaffold12023       | 2148                           | (A/C)       |
| 37300       | CadSNP12895    | <i>Desi</i>      | Ca_Desig_Scaffold12023       | 2149                           | (G/T)       |
| 37301       | CadSNP12896    | <i>Desi</i>      | Ca_Desig_Scaffold12023       | 2165                           | (C/T)       |
| 37302       | CadSNP12897    | <i>Desi</i>      | Ca_Desig_Scaffold12023       | 2167                           | (T/A)       |
| 37303       | CadSNP12898    | <i>Desi</i>      | Ca_Desig_Scaffold12023       | 2175                           | (A/G)       |
| 37304       | CadSNP12899    | <i>Desi</i>      | Ca_Desig_Scaffold12023       | 2188                           | (A/T)       |
| 37305       | CadSNP12900    | <i>Desi</i>      | Ca_Desig_Scaffold120799      | 81                             | (C/A)       |
| 37306       | CadSNP12901    | <i>Desi</i>      | Ca_Desig_Scaffold120809      | 113                            | (G/A)       |
| 37307       | CadSNP12902    | <i>Desi</i>      | Ca_Desig_Scaffold12148       | 949                            | (G/A)       |
| 37308       | CadSNP12903    | <i>Desi</i>      | Ca_Desig_Scaffold12148       | 2678                           | (C/T)       |
| 37309       | CadSNP12904    | <i>Desi</i>      | Ca_Desig_Scaffold12148       | 2683                           | (C/A)       |
| 37310       | CadSNP12905    | <i>Desi</i>      | Ca_Desig_Scaffold12148       | 2684                           | (T/A)       |
| 37311       | CadSNP12906    | <i>Desi</i>      | Ca_Desig_Scaffold12148       | 2701                           | (T/A)       |
| 37312       | CadSNP12907    | <i>Desi</i>      | Ca_Desig_Scaffold12160       | 3630                           | (G/A)       |
| 37313       | CadSNP12908    | <i>Desi</i>      | Ca_Desig_Scaffold12160       | 3669                           | (C/A)       |
| 37314       | CadSNP12909    | <i>Desi</i>      | Ca_Desig_Scaffold12160       | 3679                           | (G/A)       |
| 37315       | CadSNP12910    | <i>Desi</i>      | Ca_Desig_Scaffold12160       | 3688                           | (T/C)       |



| <b>S.N.</b> | <b>SNP IDs</b> | <b>Cultivars</b> | <b>Chromosomes/scaffolds</b> | <b>Physical positions (bp)</b> | <b>SNPs</b> |
|-------------|----------------|------------------|------------------------------|--------------------------------|-------------|
| 37316       | CadSNP12911    | <i>Desi</i>      | Ca_Desig_Scaffold12160       | 3691                           | (C/A)       |
| 37317       | CadSNP12912    | <i>Desi</i>      | Ca_Desig_Scaffold12283       | 2612                           | (T/C)       |
| 37318       | CadSNP12913    | <i>Desi</i>      | Ca_Desig_Scaffold12283       | 2669                           | (T/A)       |
| 37319       | CadSNP12914    | <i>Desi</i>      | Ca_Desig_Scaffold12299       | 2306                           | (A/G)       |
| 37320       | CadSNP12915    | <i>Desi</i>      | Ca_Desig_Scaffold12301       | 3243                           | (T/C)       |
| 37321       | CadSNP12916    | <i>Desi</i>      | Ca_Desig_Scaffold12301       | 3272                           | (G/T)       |
| 37322       | CadSNP12917    | <i>Desi</i>      | Ca_Desig_Scaffold12301       | 3320                           | (G/T)       |
| 37323       | CadSNP12918    | <i>Desi</i>      | Ca_Desig_Scaffold12315       | 1274                           | (A/C)       |
| 37324       | CadSNP12919    | <i>Desi</i>      | Ca_Desig_Scaffold12348       | 732                            | (G/C)       |
| 37325       | CadSNP12920    | <i>Desi</i>      | Ca_Desig_Scaffold12348       | 710                            | (A/G)       |
| 37326       | CadSNP12921    | <i>Desi</i>      | Ca_Desig_Scaffold12348       | 1706                           | (T/C)       |
| 37327       | CadSNP12922    | <i>Desi</i>      | Ca_Desig_Scaffold12348       | 1713                           | (G/C)       |
| 37328       | CadSNP12923    | <i>Desi</i>      | Ca_Desig_Scaffold12348       | 1813                           | (T/G)       |
| 37329       | CadSNP12924    | <i>Desi</i>      | Ca_Desig_Scaffold12348       | 1845                           | (G/T)       |
| 37330       | CadSNP12925    | <i>Desi</i>      | Ca_Desig_Scaffold12367       | 1969                           | (T/G)       |
| 37331       | CadSNP12926    | <i>Desi</i>      | Ca_Desig_Scaffold12372       | 845                            | (A/T)       |
| 37332       | CadSNP12927    | <i>Desi</i>      | Ca_Desig_Scaffold123776      | 72                             | (G/A)       |
| 37333       | CadSNP12928    | <i>Desi</i>      | Ca_Desig_Scaffold123776      | 239                            | (T/G)       |
| 37334       | CadSNP12929    | <i>Desi</i>      | Ca_Desig_Scaffold123776      | 215                            | (C/T)       |
| 37335       | CadSNP12930    | <i>Desi</i>      | Ca_Desig_Scaffold123924      | 106                            | (T/C)       |
| 37336       | CadSNP12931    | <i>Desi</i>      | Ca_Desig_Scaffold12419       | 860                            | (G/T)       |
| 37337       | CadSNP12932    | <i>Desi</i>      | Ca_Desig_Scaffold124403      | 13                             | (G/A)       |
| 37338       | CadSNP12933    | <i>Desi</i>      | Ca_Desig_Scaffold124403      | 4                              | (A/G)       |
| 37339       | CadSNP12934    | <i>Desi</i>      | Ca_Desig_Scaffold12457       | 3656                           | (G/A)       |
| 37340       | CadSNP12935    | <i>Desi</i>      | Ca_Desig_Scaffold12457       | 3654                           | (C/A)       |
| 37341       | CadSNP12936    | <i>Desi</i>      | Ca_Desig_Scaffold12488       | 3316                           | (A/C)       |
| 37342       | CadSNP12937    | <i>Desi</i>      | Ca_Desig_Scaffold12488       | 3317                           | (G/C)       |
| 37343       | CadSNP12938    | <i>Desi</i>      | Ca_Desig_Scaffold12571       | 2270                           | (T/A)       |
| 37344       | CadSNP12939    | <i>Desi</i>      | Ca_Desig_Scaffold126015      | 96                             | (G/T)       |
| 37345       | CadSNP12940    | <i>Desi</i>      | Ca_Desig_Scaffold12609       | 2182                           | (T/G)       |
| 37346       | CadSNP12941    | <i>Desi</i>      | Ca_Desig_Scaffold126213      | 137                            | (T/A)       |
| 37347       | CadSNP12942    | <i>Desi</i>      | Ca_Desig_Scaffold12637       | 47                             | (A/G)       |
| 37348       | CadSNP12943    | <i>Desi</i>      | Ca_Desig_Scaffold12637       | 87                             | (C/T)       |
| 37349       | CadSNP12944    | <i>Desi</i>      | Ca_Desig_Scaffold12637       | 40                             | (C/G)       |
| 37350       | CadSNP12945    | <i>Desi</i>      | Ca_Desig_Scaffold12637       | 25                             | (G/A)       |
| 37351       | CadSNP12946    | <i>Desi</i>      | Ca_Desig_Scaffold12643       | 1867                           | (C/T)       |
| 37352       | CadSNP12947    | <i>Desi</i>      | Ca_Desig_Scaffold12643       | 1872                           | (C/T)       |
| 37353       | CadSNP12948    | <i>Desi</i>      | Ca_Desig_Scaffold126471      | 173                            | (G/T)       |

| <b>S.N.</b> | <b>SNP IDs</b> | <b>Cultivars</b> | <b>Chromosomes/scaffolds</b> | <b>Physical positions (bp)</b> | <b>SNPs</b> |
|-------------|----------------|------------------|------------------------------|--------------------------------|-------------|
| 37354       | CadSNP12949    | <i>Desi</i>      | Ca_Desig_Scaffold12665       | 3467                           | (T/G)       |
| 37355       | CadSNP12950    | <i>Desi</i>      | Ca_Desig_Scaffold126944      | 80                             | (A/T)       |
| 37356       | CadSNP12951    | <i>Desi</i>      | Ca_Desig_Scaffold127212      | 74                             | (G/A)       |
| 37357       | CadSNP12952    | <i>Desi</i>      | Ca_Desig_Scaffold12728       | 2960                           | (C/A)       |
| 37358       | CadSNP12953    | <i>Desi</i>      | Ca_Desig_Scaffold12732       | 2889                           | (C/A)       |
| 37359       | CadSNP12954    | <i>Desi</i>      | Ca_Desig_Scaffold12732       | 2899                           | (C/T)       |
| 37360       | CadSNP12955    | <i>Desi</i>      | Ca_Desig_Scaffold12732       | 2939                           | (G/A)       |
| 37361       | CadSNP12956    | <i>Desi</i>      | Ca_Desig_Scaffold12732       | 2940                           | (C/G)       |
| 37362       | CadSNP12957    | <i>Desi</i>      | Ca_Desig_Scaffold12732       | 2944                           | (A/G)       |
| 37363       | CadSNP12958    | <i>Desi</i>      | Ca_Desig_Scaffold12732       | 2946                           | (T/G)       |
| 37364       | CadSNP12959    | <i>Desi</i>      | Ca_Desig_Scaffold127895      | 202                            | (T/A)       |
| 37365       | CadSNP12960    | <i>Desi</i>      | Ca_Desig_Scaffold12854       | 1144                           | (T/G)       |
| 37366       | CadSNP12961    | <i>Desi</i>      | Ca_Desig_Scaffold12854       | 1147                           | (T/G)       |
| 37367       | CadSNP12962    | <i>Desi</i>      | Ca_Desig_Scaffold12870       | 200                            | (C/T)       |
| 37368       | CadSNP12963    | <i>Desi</i>      | Ca_Desig_Scaffold12870       | 2943                           | (G/A)       |
| 37369       | CadSNP12964    | <i>Desi</i>      | Ca_Desig_Scaffold12885       | 2742                           | (G/C)       |
| 37370       | CadSNP12965    | <i>Desi</i>      | Ca_Desig_Scaffold129020      | 27                             | (G/T)       |
| 37371       | CadSNP12966    | <i>Desi</i>      | Ca_Desig_Scaffold129081      | 216                            | (C/G)       |
| 37372       | CadSNP12967    | <i>Desi</i>      | Ca_Desig_Scaffold129081      | 194                            | (C/T)       |
| 37373       | CadSNP12968    | <i>Desi</i>      | Ca_Desig_Scaffold12910       | 442                            | (T/C)       |
| 37374       | CadSNP12969    | <i>Desi</i>      | Ca_Desig_Scaffold12948       | 2825                           | (A/G)       |
| 37375       | CadSNP12970    | <i>Desi</i>      | Ca_Desig_Scaffold12955       | 1479                           | (A/C)       |
| 37376       | CadSNP12971    | <i>Desi</i>      | Ca_Desig_Scaffold129612      | 97                             | (A/G)       |
| 37377       | CadSNP12972    | <i>Desi</i>      | Ca_Desig_Scaffold129660      | 160                            | (C/T)       |
| 37378       | CadSNP12973    | <i>Desi</i>      | Ca_Desig_Scaffold12982       | 2982                           | (T/C)       |
| 37379       | CadSNP12974    | <i>Desi</i>      | Ca_Desig_Scaffold13005       | 858                            | (A/G)       |
| 37380       | CadSNP12975    | <i>Desi</i>      | Ca_Desig_Scaffold130155      | 110                            | (C/T)       |
| 37381       | CadSNP12976    | <i>Desi</i>      | Ca_Desig_Scaffold13031       | 521                            | (C/T)       |
| 37382       | CadSNP12977    | <i>Desi</i>      | Ca_Desig_Scaffold13034       | 2967                           | (T/C)       |
| 37383       | CadSNP12978    | <i>Desi</i>      | Ca_Desig_Scaffold13034       | 2985                           | (T/A)       |
| 37384       | CadSNP12979    | <i>Desi</i>      | Ca_Desig_Scaffold13034       | 2990                           | (A/G)       |
| 37385       | CadSNP12980    | <i>Desi</i>      | Ca_Desig_Scaffold13034       | 2994                           | (T/C)       |
| 37386       | CadSNP12981    | <i>Desi</i>      | Ca_Desig_Scaffold13034       | 3003                           | (A/C)       |
| 37387       | CadSNP12982    | <i>Desi</i>      | Ca_Desig_Scaffold13034       | 3007                           | (G/C)       |
| 37388       | CadSNP12983    | <i>Desi</i>      | Ca_Desig_Scaffold13034       | 3008                           | (G/C)       |
| 37389       | CadSNP12984    | <i>Desi</i>      | Ca_Desig_Scaffold13034       | 3009                           | (G/A)       |
| 37390       | CadSNP12985    | <i>Desi</i>      | Ca_Desig_Scaffold13034       | 3021                           | (T/A)       |
| 37391       | CadSNP12986    | <i>Desi</i>      | Ca_Desig_Scaffold13034       | 3033                           | (T/A)       |

| <b>S.N.</b> | <b>SNP IDs</b> | <b>Cultivars</b> | <b>Chromosomes/scaffolds</b> | <b>Physical positions (bp)</b> | <b>SNPs</b> |
|-------------|----------------|------------------|------------------------------|--------------------------------|-------------|
| 37392       | CadSNP12987    | <i>Desi</i>      | Ca_Desig_Scaffold13035       | 3428                           | (T/G)       |
| 37393       | CadSNP12988    | <i>Desi</i>      | Ca_Desig_Scaffold13063       | 3280                           | (G/A)       |
| 37394       | CadSNP12989    | <i>Desi</i>      | Ca_Desig_Scaffold13063       | 3323                           | (G/T)       |
| 37395       | CadSNP12990    | <i>Desi</i>      | Ca_Desig_Scaffold13063       | 3310                           | (G/A)       |
| 37396       | CadSNP12991    | <i>Desi</i>      | Ca_Desig_Scaffold130812      | 153                            | (G/A)       |
| 37397       | CadSNP12992    | <i>Desi</i>      | Ca_Desig_Scaffold130812      | 158                            | (A/G)       |
| 37398       | CadSNP12993    | <i>Desi</i>      | Ca_Desig_Scaffold130812      | 167                            | (G/T)       |
| 37399       | CadSNP12994    | <i>Desi</i>      | Ca_Desig_Scaffold130812      | 210                            | (G/A)       |
| 37400       | CadSNP12995    | <i>Desi</i>      | Ca_Desig_Scaffold130812      | 211                            | (G/T)       |
| 37401       | CadSNP12996    | <i>Desi</i>      | Ca_Desig_Scaffold130812      | 212                            | (G/A)       |
| 37402       | CadSNP12997    | <i>Desi</i>      | Ca_Desig_Scaffold130812      | 237                            | (T/G)       |
| 37403       | CadSNP12998    | <i>Desi</i>      | Ca_Desig_Scaffold130812      | 220                            | (T/G)       |
| 37404       | CadSNP12999    | <i>Desi</i>      | Ca_Desig_Scaffold130812      | 195                            | (T/C)       |
| 37405       | CadSNP13000    | <i>Desi</i>      | Ca_Desig_Scaffold13119       | 3446                           | (T/C)       |
| 37406       | CadSNP13001    | <i>Desi</i>      | Ca_Desig_Scaffold13125       | 2528                           | (C/T)       |
| 37407       | CadSNP13002    | <i>Desi</i>      | Ca_Desig_Scaffold131508      | 76                             | (G/A)       |
| 37408       | CadSNP13003    | <i>Desi</i>      | Ca_Desig_Scaffold13202       | 1171                           | (T/G)       |
| 37409       | CadSNP13004    | <i>Desi</i>      | Ca_Desig_Scaffold13202       | 1422                           | (T/A)       |
| 37410       | CadSNP13005    | <i>Desi</i>      | Ca_Desig_Scaffold13208       | 2219                           | (C/T)       |
| 37411       | CadSNP13006    | <i>Desi</i>      | Ca_Desig_Scaffold13208       | 2271                           | (G/T)       |
| 37412       | CadSNP13007    | <i>Desi</i>      | Ca_Desig_Scaffold13208       | 2315                           | (G/A)       |
| 37413       | CadSNP13008    | <i>Desi</i>      | Ca_Desig_Scaffold13208       | 2262                           | (G/A)       |
| 37414       | CadSNP13009    | <i>Desi</i>      | Ca_Desig_Scaffold13242       | 3274                           | (C/T)       |
| 37415       | CadSNP13010    | <i>Desi</i>      | Ca_Desig_Scaffold13289       | 474                            | (A/G)       |
| 37416       | CadSNP13011    | <i>Desi</i>      | Ca_Desig_Scaffold13289       | 493                            | (A/G)       |
| 37417       | CadSNP13012    | <i>Desi</i>      | Ca_Desig_Scaffold13289       | 541                            | (C/T)       |
| 37418       | CadSNP13013    | <i>Desi</i>      | Ca_Desig_Scaffold13311       | 1736                           | (A/C)       |
| 37419       | CadSNP13014    | <i>Desi</i>      | Ca_Desig_Scaffold13311       | 2541                           | (A/G)       |
| 37420       | CadSNP13015    | <i>Desi</i>      | Ca_Desig_Scaffold13311       | 2556                           | (G/A)       |
| 37421       | CadSNP13016    | <i>Desi</i>      | Ca_Desig_Scaffold13311       | 2566                           | (A/C)       |
| 37422       | CadSNP13017    | <i>Desi</i>      | Ca_Desig_Scaffold13361       | 1972                           | (G/A)       |
| 37423       | CadSNP13018    | <i>Desi</i>      | Ca_Desig_Scaffold133642      | 155                            | (G/A)       |
| 37424       | CadSNP13019    | <i>Desi</i>      | Ca_Desig_Scaffold13406       | 2392                           | (G/A)       |
| 37425       | CadSNP13020    | <i>Desi</i>      | Ca_Desig_Scaffold13406       | 2453                           | (G/A)       |
| 37426       | CadSNP13021    | <i>Desi</i>      | Ca_Desig_Scaffold13422       | 2539                           | (G/A)       |
| 37427       | CadSNP13022    | <i>Desi</i>      | Ca_Desig_Scaffold13422       | 2577                           | (A/G)       |
| 37428       | CadSNP13023    | <i>Desi</i>      | Ca_Desig_Scaffold134328      | 268                            | (C/T)       |
| 37429       | CadSNP13024    | <i>Desi</i>      | Ca_Desig_Scaffold13469       | 2505                           | (C/G)       |

| <b>S.N.</b> | <b>SNP IDs</b> | <b>Cultivars</b> | <b>Chromosomes/scaffolds</b> | <b>Physical positions (bp)</b> | <b>SNPs</b> |
|-------------|----------------|------------------|------------------------------|--------------------------------|-------------|
| 37430       | CadSNP13025    | <i>Desi</i>      | Ca_Desig_Scaffold134790      | 223                            | (A/G)       |
| 37431       | CadSNP13026    | <i>Desi</i>      | Ca_Desig_Scaffold13485       | 2644                           | (C/T)       |
| 37432       | CadSNP13027    | <i>Desi</i>      | Ca_Desig_Scaffold134876      | 95                             | (G/A)       |
| 37433       | CadSNP13028    | <i>Desi</i>      | Ca_Desig_Scaffold134876      | 135                            | (G/A)       |
| 37434       | CadSNP13029    | <i>Desi</i>      | Ca_Desig_Scaffold134876      | 175                            | (G/A)       |
| 37435       | CadSNP13030    | <i>Desi</i>      | Ca_Desig_Scaffold13504       | 66258                          | (C/T)       |
| 37436       | CadSNP13031    | <i>Desi</i>      | Ca_Desig_Scaffold13504       | 71247                          | (G/A)       |
| 37437       | CadSNP13032    | <i>Desi</i>      | Ca_Desig_Scaffold13504       | 146111                         | (T/C)       |
| 37438       | CadSNP13033    | <i>Desi</i>      | Ca_Desig_Scaffold13506       | 491                            | (G/T)       |
| 37439       | CadSNP13034    | <i>Desi</i>      | Ca_Desig_Scaffold13506       | 512                            | (C/A)       |
| 37440       | CadSNP13035    | <i>Desi</i>      | Ca_Desig_Scaffold135279      | 222                            | (C/T)       |
| 37441       | CadSNP13036    | <i>Desi</i>      | Ca_Desig_Scaffold13620       | 2952                           | (C/T)       |
| 37442       | CadSNP13037    | <i>Desi</i>      | Ca_Desig_Scaffold13648       | 2923                           | (C/G)       |
| 37443       | CadSNP13038    | <i>Desi</i>      | Ca_Desig_Scaffold13648       | 2921                           | (G/T)       |
| 37444       | CadSNP13039    | <i>Desi</i>      | Ca_Desig_Scaffold13648       | 2911                           | (G/A)       |
| 37445       | CadSNP13040    | <i>Desi</i>      | Ca_Desig_Scaffold13681       | 3109                           | (A/G)       |
| 37446       | CadSNP13041    | <i>Desi</i>      | Ca_Desig_Scaffold13681       | 3093                           | (A/C)       |
| 37447       | CadSNP13042    | <i>Desi</i>      | Ca_Desig_Scaffold136826      | 244                            | (C/A)       |
| 37448       | CadSNP13043    | <i>Desi</i>      | Ca_Desig_Scaffold136826      | 234                            | (A/G)       |
| 37449       | CadSNP13044    | <i>Desi</i>      | Ca_Desig_Scaffold13701       | 401                            | (T/C)       |
| 37450       | CadSNP13045    | <i>Desi</i>      | Ca_Desig_Scaffold13720       | 351                            | (T/C)       |
| 37451       | CadSNP13046    | <i>Desi</i>      | Ca_Desig_Scaffold137705      | 186                            | (C/T)       |
| 37452       | CadSNP13047    | <i>Desi</i>      | Ca_Desig_Scaffold137705      | 165                            | (G/A)       |
| 37453       | CadSNP13048    | <i>Desi</i>      | Ca_Desig_Scaffold13791       | 586                            | (G/A)       |
| 37454       | CadSNP13049    | <i>Desi</i>      | Ca_Desig_Scaffold13827       | 463                            | (T/A)       |
| 37455       | CadSNP13050    | <i>Desi</i>      | Ca_Desig_Scaffold13827       | 462                            | (G/T)       |
| 37456       | CadSNP13051    | <i>Desi</i>      | Ca_Desig_Scaffold13827       | 461                            | (A/C)       |
| 37457       | CadSNP13052    | <i>Desi</i>      | Ca_Desig_Scaffold13827       | 421                            | (A/G)       |
| 37458       | CadSNP13053    | <i>Desi</i>      | Ca_Desig_Scaffold13827       | 394                            | (A/C)       |
| 37459       | CadSNP13054    | <i>Desi</i>      | Ca_Desig_Scaffold13827       | 392                            | (T/C)       |
| 37460       | CadSNP13055    | <i>Desi</i>      | Ca_Desig_Scaffold13827       | 420                            | (G/A)       |
| 37461       | CadSNP13056    | <i>Desi</i>      | Ca_Desig_Scaffold13842       | 3051                           | (C/A)       |
| 37462       | CadSNP13057    | <i>Desi</i>      | Ca_Desig_Scaffold13856       | 2474                           | (A/T)       |
| 37463       | CadSNP13058    | <i>Desi</i>      | Ca_Desig_Scaffold13867       | 3065                           | (G/A)       |
| 37464       | CadSNP13059    | <i>Desi</i>      | Ca_Desig_Scaffold13867       | 3054                           | (A/G)       |
| 37465       | CadSNP13060    | <i>Desi</i>      | Ca_Desig_Scaffold14224       | 892                            | (A/C)       |
| 37466       | CadSNP13061    | <i>Desi</i>      | Ca_Desig_Scaffold14224       | 945                            | (C/T)       |
| 37467       | CadSNP13062    | <i>Desi</i>      | Ca_Desig_Scaffold14224       | 2008                           | (C/T)       |

| <b>S.N.</b> | <b>SNP IDs</b> | <b>Cultivars</b> | <b>Chromosomes/scaffolds</b> | <b>Physical positions (bp)</b> | <b>SNPs</b> |
|-------------|----------------|------------------|------------------------------|--------------------------------|-------------|
| 37468       | CadSNP13063    | <i>Desi</i>      | Ca_Desig_Scaffold14239       | 656                            | (G/A)       |
| 37469       | CadSNP13064    | <i>Desi</i>      | Ca_Desig_Scaffold14239       | 2098                           | (T/A)       |
| 37470       | CadSNP13065    | <i>Desi</i>      | Ca_Desig_Scaffold14295       | 911                            | (T/G)       |
| 37471       | CadSNP13066    | <i>Desi</i>      | Ca_Desig_Scaffold142952      | 6                              | (C/A)       |
| 37472       | CadSNP13067    | <i>Desi</i>      | Ca_Desig_Scaffold144115      | 141                            | (A/T)       |
| 37473       | CadSNP13068    | <i>Desi</i>      | Ca_Desig_Scaffold144115      | 129                            | (G/T)       |
| 37474       | CadSNP13069    | <i>Desi</i>      | Ca_Desig_Scaffold14436       | 538                            | (C/G)       |
| 37475       | CadSNP13070    | <i>Desi</i>      | Ca_Desig_Scaffold144714      | 78                             | (C/G)       |
| 37476       | CadSNP13071    | <i>Desi</i>      | Ca_Desig_Scaffold144976      | 151                            | (G/T)       |
| 37477       | CadSNP13072    | <i>Desi</i>      | Ca_Desig_Scaffold14538       | 2074                           | (A/C)       |
| 37478       | CadSNP13073    | <i>Desi</i>      | Ca_Desig_Scaffold14538       | 2401                           | (T/G)       |
| 37479       | CadSNP13074    | <i>Desi</i>      | Ca_Desig_Scaffold14538       | 2526                           | (C/G)       |
| 37480       | CadSNP13075    | <i>Desi</i>      | Ca_Desig_Scaffold14552       | 317                            | (G/A)       |
| 37481       | CadSNP13076    | <i>Desi</i>      | Ca_Desig_Scaffold14576       | 128                            | (A/G)       |
| 37482       | CadSNP13077    | <i>Desi</i>      | Ca_Desig_Scaffold146395      | 26                             | (T/C)       |
| 37483       | CadSNP13078    | <i>Desi</i>      | Ca_Desig_Scaffold14650       | 1760                           | (C/A)       |
| 37484       | CadSNP13079    | <i>Desi</i>      | Ca_Desig_Scaffold14650       | 1801                           | (C/A)       |
| 37485       | CadSNP13080    | <i>Desi</i>      | Ca_Desig_Scaffold14650       | 1812                           | (G/A)       |
| 37486       | CadSNP13081    | <i>Desi</i>      | Ca_Desig_Scaffold14650       | 1825                           | (C/T)       |
| 37487       | CadSNP13082    | <i>Desi</i>      | Ca_Desig_Scaffold14650       | 1835                           | (G/A)       |
| 37488       | CadSNP13083    | <i>Desi</i>      | Ca_Desig_Scaffold14650       | 1915                           | (T/C)       |
| 37489       | CadSNP13084    | <i>Desi</i>      | Ca_Desig_Scaffold14650       | 1898                           | (C/T)       |
| 37490       | CadSNP13085    | <i>Desi</i>      | Ca_Desig_Scaffold14650       | 1848                           | (T/C)       |
| 37491       | CadSNP13086    | <i>Desi</i>      | Ca_Desig_Scaffold14650       | 2042                           | (G/A)       |
| 37492       | CadSNP13087    | <i>Desi</i>      | Ca_Desig_Scaffold14650       | 2049                           | (G/T)       |
| 37493       | CadSNP13088    | <i>Desi</i>      | Ca_Desig_Scaffold14650       | 2058                           | (T/C)       |
| 37494       | CadSNP13089    | <i>Desi</i>      | Ca_Desig_Scaffold146652      | 49                             | (G/A)       |
| 37495       | CadSNP13090    | <i>Desi</i>      | Ca_Desig_Scaffold146652      | 17                             | (T/A)       |
| 37496       | CadSNP13091    | <i>Desi</i>      | Ca_Desig_Scaffold146748      | 168                            | (G/A)       |
| 37497       | CadSNP13092    | <i>Desi</i>      | Ca_Desig_Scaffold14680       | 1807                           | (A/G)       |
| 37498       | CadSNP13093    | <i>Desi</i>      | Ca_Desig_Scaffold147274      | 224                            | (C/T)       |
| 37499       | CadSNP13094    | <i>Desi</i>      | Ca_Desig_Scaffold147304      | 58                             | (C/T)       |
| 37500       | CadSNP13095    | <i>Desi</i>      | Ca_Desig_Scaffold147304      | 23                             | (A/G)       |
| 37501       | CadSNP13096    | <i>Desi</i>      | Ca_Desig_Scaffold14785       | 1628                           | (T/C)       |
| 37502       | CadSNP13097    | <i>Desi</i>      | Ca_Desig_Scaffold14785       | 1596                           | (C/T)       |
| 37503       | CadSNP13098    | <i>Desi</i>      | Ca_Desig_Scaffold14785       | 1682                           | (T/C)       |
| 37504       | CadSNP13099    | <i>Desi</i>      | Ca_Desig_Scaffold14949       | 2677                           | (G/C)       |
| 37505       | CadSNP13100    | <i>Desi</i>      | Ca_Desig_Scaffold14997       | 2323                           | (C/G)       |

| <b>S.N.</b> | <b>SNP IDs</b> | <b>Cultivars</b> | <b>Chromosomes/scaffolds</b> | <b>Physical positions (bp)</b> | <b>SNPs</b> |
|-------------|----------------|------------------|------------------------------|--------------------------------|-------------|
| 37506       | CadSNP13101    | <i>Desi</i>      | Ca_Desig_Scaffold14997       | 2342                           | (A/G)       |
| 37507       | CadSNP13102    | <i>Desi</i>      | Ca_Desig_Scaffold14997       | 2350                           | (G/T)       |
| 37508       | CadSNP13103    | <i>Desi</i>      | Ca_Desig_Scaffold14997       | 2354                           | (A/G)       |
| 37509       | CadSNP13104    | <i>Desi</i>      | Ca_Desig_Scaffold14998       | 2169                           | (G/T)       |
| 37510       | CadSNP13105    | <i>Desi</i>      | Ca_Desig_Scaffold14998       | 2176                           | (A/C)       |
| 37511       | CadSNP13106    | <i>Desi</i>      | Ca_Desig_Scaffold14998       | 2215                           | (A/C)       |
| 37512       | CadSNP13107    | <i>Desi</i>      | Ca_Desig_Scaffold14998       | 2289                           | (G/T)       |
| 37513       | CadSNP13108    | <i>Desi</i>      | Ca_Desig_Scaffold15011       | 2205                           | (T/G)       |
| 37514       | CadSNP13109    | <i>Desi</i>      | Ca_Desig_Scaffold15011       | 2183                           | (A/C)       |
| 37515       | CadSNP13110    | <i>Desi</i>      | Ca_Desig_Scaffold15011       | 2178                           | (C/T)       |
| 37516       | CadSNP13111    | <i>Desi</i>      | Ca_Desig_Scaffold15021       | 46709                          | (G/A)       |
| 37517       | CadSNP13112    | <i>Desi</i>      | Ca_Desig_Scaffold15021       | 46719                          | (T/C)       |
| 37518       | CadSNP13113    | <i>Desi</i>      | Ca_Desig_Scaffold15049       | 2565                           | (T/G)       |
| 37519       | CadSNP13114    | <i>Desi</i>      | Ca_Desig_Scaffold15076       | 1259                           | (A/G)       |
| 37520       | CadSNP13115    | <i>Desi</i>      | Ca_Desig_Scaffold15079       | 2449                           | (A/G)       |
| 37521       | CadSNP13116    | <i>Desi</i>      | Ca_Desig_Scaffold15136       | 1919                           | (C/T)       |
| 37522       | CadSNP13117    | <i>Desi</i>      | Ca_Desig_Scaffold15212       | 2072                           | (T/C)       |
| 37523       | CadSNP13118    | <i>Desi</i>      | Ca_Desig_Scaffold15212       | 2135                           | (C/A)       |
| 37524       | CadSNP13119    | <i>Desi</i>      | Ca_Desig_Scaffold15344       | 1173                           | (T/G)       |
| 37525       | CadSNP13120    | <i>Desi</i>      | Ca_Desig_Scaffold15344       | 1386                           | (A/G)       |
| 37526       | CadSNP13121    | <i>Desi</i>      | Ca_Desig_Scaffold15395       | 1203                           | (G/T)       |
| 37527       | CadSNP13122    | <i>Desi</i>      | Ca_Desig_Scaffold15395       | 1207                           | (C/T)       |
| 37528       | CadSNP13123    | <i>Desi</i>      | Ca_Desig_Scaffold15400       | 777                            | (A/G)       |
| 37529       | CadSNP13124    | <i>Desi</i>      | Ca_Desig_Scaffold154470      | 73                             | (T/G)       |
| 37530       | CadSNP13125    | <i>Desi</i>      | Ca_Desig_Scaffold15536       | 404                            | (G/A)       |
| 37531       | CadSNP13126    | <i>Desi</i>      | Ca_Desig_Scaffold15536       | 448                            | (C/T)       |
| 37532       | CadSNP13127    | <i>Desi</i>      | Ca_Desig_Scaffold15536       | 449                            | (A/G)       |
| 37533       | CadSNP13128    | <i>Desi</i>      | Ca_Desig_Scaffold15606       | 1603                           | (C/T)       |
| 37534       | CadSNP13129    | <i>Desi</i>      | Ca_Desig_Scaffold15609       | 736                            | (G/T)       |
| 37535       | CadSNP13130    | <i>Desi</i>      | Ca_Desig_Scaffold15702       | 70220                          | (G/C)       |
| 37536       | CadSNP13131    | <i>Desi</i>      | Ca_Desig_Scaffold15702       | 70248                          | (T/G)       |
| 37537       | CadSNP13132    | <i>Desi</i>      | Ca_Desig_Scaffold15761       | 1215                           | (C/G)       |
| 37538       | CadSNP13133    | <i>Desi</i>      | Ca_Desig_Scaffold15763       | 229                            | (A/G)       |
| 37539       | CadSNP13134    | <i>Desi</i>      | Ca_Desig_Scaffold15767       | 2368                           | (T/A)       |
| 37540       | CadSNP13135    | <i>Desi</i>      | Ca_Desig_Scaffold157699      | 64                             | (C/A)       |
| 37541       | CadSNP13136    | <i>Desi</i>      | Ca_Desig_Scaffold15786       | 1180                           | (C/T)       |
| 37542       | CadSNP13137    | <i>Desi</i>      | Ca_Desig_Scaffold15794       | 427                            | (C/T)       |
| 37543       | CadSNP13138    | <i>Desi</i>      | Ca_Desig_Scaffold15860       | 579                            | (C/A)       |

| <b>S.N.</b> | <b>SNP IDs</b> | <b>Cultivars</b> | <b>Chromosomes/scaffolds</b> | <b>Physical positions (bp)</b> | <b>SNPs</b> |
|-------------|----------------|------------------|------------------------------|--------------------------------|-------------|
| 37544       | CadSNP13139    | <i>Desi</i>      | Ca_Desig_Scaffold15860       | 598                            | (G/A)       |
| 37545       | CadSNP13140    | <i>Desi</i>      | Ca_Desig_Scaffold15889       | 859                            | (A/C)       |
| 37546       | CadSNP13141    | <i>Desi</i>      | Ca_Desig_Scaffold15925       | 1530                           | (A/T)       |
| 37547       | CadSNP13142    | <i>Desi</i>      | Ca_Desig_Scaffold15982       | 1509                           | (A/G)       |
| 37548       | CadSNP13143    | <i>Desi</i>      | Ca_Desig_Scaffold160017      | 149                            | (C/T)       |
| 37549       | CadSNP13144    | <i>Desi</i>      | Ca_Desig_Scaffold160256      | 22                             | (G/A)       |
| 37550       | CadSNP13145    | <i>Desi</i>      | Ca_Desig_Scaffold16470       | 1966                           | (G/A)       |
| 37551       | CadSNP13146    | <i>Desi</i>      | Ca_Desig_Scaffold164762      | 121                            | (G/A)       |
| 37552       | CadSNP13147    | <i>Desi</i>      | Ca_Desig_Scaffold16485       | 1371                           | (G/A)       |
| 37553       | CadSNP13148    | <i>Desi</i>      | Ca_Desig_Scaffold16557       | 2033                           | (C/T)       |
| 37554       | CadSNP13149    | <i>Desi</i>      | Ca_Desig_Scaffold16557       | 1993                           | (C/T)       |
| 37555       | CadSNP13150    | <i>Desi</i>      | Ca_Desig_Scaffold16560       | 2108                           | (G/A)       |
| 37556       | CadSNP13151    | <i>Desi</i>      | Ca_Desig_Scaffold166659      | 75                             | (C/A)       |
| 37557       | CadSNP13152    | <i>Desi</i>      | Ca_Desig_Scaffold16670       | 416                            | (C/T)       |
| 37558       | CadSNP13153    | <i>Desi</i>      | Ca_Desig_Scaffold16670       | 432                            | (G/A)       |
| 37559       | CadSNP13154    | <i>Desi</i>      | Ca_Desig_Scaffold16670       | 450                            | (T/C)       |
| 37560       | CadSNP13155    | <i>Desi</i>      | Ca_Desig_Scaffold16670       | 456                            | (A/T)       |
| 37561       | CadSNP13156    | <i>Desi</i>      | Ca_Desig_Scaffold16670       | 458                            | (T/A)       |
| 37562       | CadSNP13157    | <i>Desi</i>      | Ca_Desig_Scaffold16670       | 467                            | (C/A)       |
| 37563       | CadSNP13158    | <i>Desi</i>      | Ca_Desig_Scaffold16670       | 475                            | (C/T)       |
| 37564       | CadSNP13159    | <i>Desi</i>      | Ca_Desig_Scaffold16670       | 477                            | (G/T)       |
| 37565       | CadSNP13160    | <i>Desi</i>      | Ca_Desig_Scaffold16735       | 716                            | (T/C)       |
| 37566       | CadSNP13161    | <i>Desi</i>      | Ca_Desig_Scaffold16739       | 276                            | (C/A)       |
| 37567       | CadSNP13162    | <i>Desi</i>      | Ca_Desig_Scaffold16742       | 53574                          | (A/C)       |
| 37568       | CadSNP13163    | <i>Desi</i>      | Ca_Desig_Scaffold16742       | 53689                          | (C/T)       |
| 37569       | CadSNP13164    | <i>Desi</i>      | Ca_Desig_Scaffold16815       | 672                            | (G/A)       |
| 37570       | CadSNP13165    | <i>Desi</i>      | Ca_Desig_Scaffold16815       | 644                            | (A/C)       |
| 37571       | CadSNP13166    | <i>Desi</i>      | Ca_Desig_Scaffold16815       | 629                            | (C/T)       |
| 37572       | CadSNP13167    | <i>Desi</i>      | Ca_Desig_Scaffold16815       | 713                            | (G/A)       |
| 37573       | CadSNP13168    | <i>Desi</i>      | Ca_Desig_Scaffold16815       | 753                            | (T/C)       |
| 37574       | CadSNP13169    | <i>Desi</i>      | Ca_Desig_Scaffold16815       | 761                            | (C/T)       |
| 37575       | CadSNP13170    | <i>Desi</i>      | Ca_Desig_Scaffold16815       | 765                            | (T/C)       |
| 37576       | CadSNP13171    | <i>Desi</i>      | Ca_Desig_Scaffold16831       | 31556                          | (C/T)       |
| 37577       | CadSNP13172    | <i>Desi</i>      | Ca_Desig_Scaffold16831       | 54436                          | (A/G)       |
| 37578       | CadSNP13173    | <i>Desi</i>      | Ca_Desig_Scaffold16831       | 62613                          | (G/T)       |
| 37579       | CadSNP13174    | <i>Desi</i>      | Ca_Desig_Scaffold16831       | 71543                          | (T/A)       |
| 37580       | CadSNP13175    | <i>Desi</i>      | Ca_Desig_Scaffold16831       | 71597                          | (G/A)       |
| 37581       | CadSNP13176    | <i>Desi</i>      | Ca_Desig_Scaffold16854       | 953                            | (T/C)       |

| <b>S.N.</b> | <b>SNP IDs</b> | <b>Cultivars</b> | <b>Chromosomes/scaffolds</b> | <b>Physical positions (bp)</b> | <b>SNPs</b> |
|-------------|----------------|------------------|------------------------------|--------------------------------|-------------|
| 37582       | CadSNP13177    | <i>Desi</i>      | Ca_Desig_Scaffold169239      | 29                             | (A/T)       |
| 37583       | CadSNP13178    | <i>Desi</i>      | Ca_Desig_Scaffold169239      | 28                             | (C/T)       |
| 37584       | CadSNP13179    | <i>Desi</i>      | Ca_Desig_Scaffold17048       | 400                            | (T/C)       |
| 37585       | CadSNP13180    | <i>Desi</i>      | Ca_Desig_Scaffold17048       | 379                            | (C/G)       |
| 37586       | CadSNP13181    | <i>Desi</i>      | Ca_Desig_Scaffold17048       | 369                            | (T/C)       |
| 37587       | CadSNP13182    | <i>Desi</i>      | Ca_Desig_Scaffold17048       | 355                            | (G/C)       |
| 37588       | CadSNP13183    | <i>Desi</i>      | Ca_Desig_Scaffold171113      | 1357                           | (C/A)       |
| 37589       | CadSNP13184    | <i>Desi</i>      | Ca_Desig_Scaffold171270      | 24                             | (T/C)       |
| 37590       | CadSNP13185    | <i>Desi</i>      | Ca_Desig_Scaffold17235       | 225218                         | (C/T)       |
| 37591       | CadSNP13186    | <i>Desi</i>      | Ca_Desig_Scaffold17466       | 1776                           | (C/T)       |
| 37592       | CadSNP13187    | <i>Desi</i>      | Ca_Desig_Scaffold17466       | 1787                           | (C/T)       |
| 37593       | CadSNP13188    | <i>Desi</i>      | Ca_Desig_Scaffold17466       | 1810                           | (A/G)       |
| 37594       | CadSNP13189    | <i>Desi</i>      | Ca_Desig_Scaffold17466       | 1928                           | (G/T)       |
| 37595       | CadSNP13190    | <i>Desi</i>      | Ca_Desig_Scaffold17480       | 1076                           | (T/C)       |
| 37596       | CadSNP13191    | <i>Desi</i>      | Ca_Desig_Scaffold17489       | 1995                           | (G/A)       |
| 37597       | CadSNP13192    | <i>Desi</i>      | Ca_Desig_Scaffold17489       | 1997                           | (G/A)       |
| 37598       | CadSNP13193    | <i>Desi</i>      | Ca_Desig_Scaffold17489       | 1999                           | (G/A)       |
| 37599       | CadSNP13194    | <i>Desi</i>      | Ca_Desig_Scaffold17489       | 2000                           | (A/C)       |
| 37600       | CadSNP13195    | <i>Desi</i>      | Ca_Desig_Scaffold17489       | 2001                           | (G/A)       |
| 37601       | CadSNP13196    | <i>Desi</i>      | Ca_Desig_Scaffold17489       | 2003                           | (A/G)       |
| 37602       | CadSNP13197    | <i>Desi</i>      | Ca_Desig_Scaffold17669       | 1281                           | (A/G)       |
| 37603       | CadSNP13198    | <i>Desi</i>      | Ca_Desig_Scaffold17669       | 1292                           | (T/C)       |
| 37604       | CadSNP13199    | <i>Desi</i>      | Ca_Desig_Scaffold17669       | 1306                           | (C/T)       |
| 37605       | CadSNP13200    | <i>Desi</i>      | Ca_Desig_Scaffold17669       | 1334                           | (C/T)       |
| 37606       | CadSNP13201    | <i>Desi</i>      | Ca_Desig_Scaffold17669       | 1354                           | (A/G)       |
| 37607       | CadSNP13202    | <i>Desi</i>      | Ca_Desig_Scaffold17669       | 1362                           | (A/G)       |
| 37608       | CadSNP13203    | <i>Desi</i>      | Ca_Desig_Scaffold17720       | 1138                           | (A/T)       |
| 37609       | CadSNP13204    | <i>Desi</i>      | Ca_Desig_Scaffold17720       | 1251                           | (G/A)       |
| 37610       | CadSNP13205    | <i>Desi</i>      | Ca_Desig_Scaffold17720       | 1462                           | (C/T)       |
| 37611       | CadSNP13206    | <i>Desi</i>      | Ca_Desig_Scaffold17841       | 1253                           | (T/C)       |
| 37612       | CadSNP13207    | <i>Desi</i>      | Ca_Desig_Scaffold17841       | 1219                           | (C/T)       |
| 37613       | CadSNP13208    | <i>Desi</i>      | Ca_Desig_Scaffold17866       | 428                            | (C/G)       |
| 37614       | CadSNP13209    | <i>Desi</i>      | Ca_Desig_Scaffold17866       | 437                            | (A/T)       |
| 37615       | CadSNP13210    | <i>Desi</i>      | Ca_Desig_Scaffold17866       | 439                            | (A/C)       |
| 37616       | CadSNP13211    | <i>Desi</i>      | Ca_Desig_Scaffold17866       | 459                            | (C/T)       |
| 37617       | CadSNP13212    | <i>Desi</i>      | Ca_Desig_Scaffold17866       | 460                            | (C/T)       |
| 37618       | CadSNP13213    | <i>Desi</i>      | Ca_Desig_Scaffold17866       | 468                            | (C/T)       |
| 37619       | CadSNP13214    | <i>Desi</i>      | Ca_Desig_Scaffold17866       | 476                            | (T/C)       |



| <b>S.N.</b> | <b>SNP IDs</b> | <b>Cultivars</b> | <b>Chromosomes/scaffolds</b> | <b>Physical positions (bp)</b> | <b>SNPs</b> |
|-------------|----------------|------------------|------------------------------|--------------------------------|-------------|
| 37620       | CadSNP13215    | <i>Desi</i>      | Ca_Desig_Scaffold17866       | 505                            | (G/A)       |
| 37621       | CadSNP13216    | <i>Desi</i>      | Ca_Desig_Scaffold17866       | 558                            | (G/A)       |
| 37622       | CadSNP13217    | <i>Desi</i>      | Ca_Desig_Scaffold17866       | 553                            | (C/A)       |
| 37623       | CadSNP13218    | <i>Desi</i>      | Ca_Desig_Scaffold17866       | 545                            | (C/T)       |
| 37624       | CadSNP13219    | <i>Desi</i>      | Ca_Desig_Scaffold17866       | 536                            | (G/C)       |
| 37625       | CadSNP13220    | <i>Desi</i>      | Ca_Desig_Scaffold17866       | 522                            | (G/T)       |
| 37626       | CadSNP13221    | <i>Desi</i>      | Ca_Desig_Scaffold17872       | 1621                           | (G/T)       |
| 37627       | CadSNP13222    | <i>Desi</i>      | Ca_Desig_Scaffold17972       | 702                            | (G/C)       |
| 37628       | CadSNP13223    | <i>Desi</i>      | Ca_Desig_Scaffold17972       | 1169                           | (G/A)       |
| 37629       | CadSNP13224    | <i>Desi</i>      | Ca_Desig_Scaffold17972       | 1176                           | (G/T)       |
| 37630       | CadSNP13225    | <i>Desi</i>      | Ca_Desig_Scaffold17972       | 1177                           | (A/T)       |
| 37631       | CadSNP13226    | <i>Desi</i>      | Ca_Desig_Scaffold17972       | 1178                           | (A/C)       |
| 37632       | CadSNP13227    | <i>Desi</i>      | Ca_Desig_Scaffold182656      | 305                            | (G/T)       |
| 37633       | CadSNP13228    | <i>Desi</i>      | Ca_Desig_Scaffold182656      | 316                            | (C/T)       |
| 37634       | CadSNP13229    | <i>Desi</i>      | Ca_Desig_Scaffold182656      | 319                            | (T/G)       |
| 37635       | CadSNP13230    | <i>Desi</i>      | Ca_Desig_Scaffold182656      | 333                            | (A/C)       |
| 37636       | CadSNP13231    | <i>Desi</i>      | Ca_Desig_Scaffold182656      | 349                            | (A/C)       |
| 37637       | CadSNP13232    | <i>Desi</i>      | Ca_Desig_Scaffold182656      | 441                            | (T/A)       |
| 37638       | CadSNP13233    | <i>Desi</i>      | Ca_Desig_Scaffold182656      | 411                            | (G/T)       |
| 37639       | CadSNP13234    | <i>Desi</i>      | Ca_Desig_Scaffold182656      | 398                            | (A/C)       |
| 37640       | CadSNP13235    | <i>Desi</i>      | Ca_Desig_Scaffold182656      | 395                            | (A/T)       |
| 37641       | CadSNP13236    | <i>Desi</i>      | Ca_Desig_Scaffold182656      | 385                            | (T/G)       |
| 37642       | CadSNP13237    | <i>Desi</i>      | Ca_Desig_Scaffold182661      | 226                            | (G/C)       |
| 37643       | CadSNP13238    | <i>Desi</i>      | Ca_Desig_Scaffold182661      | 207                            | (A/G)       |
| 37644       | CadSNP13239    | <i>Desi</i>      | Ca_Desig_Scaffold182661      | 196                            | (C/G)       |
| 37645       | CadSNP13240    | <i>Desi</i>      | Ca_Desig_Scaffold18322       | 1608                           | (G/T)       |
| 37646       | CadSNP13241    | <i>Desi</i>      | Ca_Desig_Scaffold18445       | 1430                           | (A/G)       |
| 37647       | CadSNP13242    | <i>Desi</i>      | Ca_Desig_Scaffold18445       | 1452                           | (G/T)       |
| 37648       | CadSNP13243    | <i>Desi</i>      | Ca_Desig_Scaffold18545       | 708                            | (T/C)       |
| 37649       | CadSNP13244    | <i>Desi</i>      | Ca_Desig_Scaffold18545       | 704                            | (G/T)       |
| 37650       | CadSNP13245    | <i>Desi</i>      | Ca_Desig_Scaffold18679       | 854                            | (C/T)       |
| 37651       | CadSNP13246    | <i>Desi</i>      | Ca_Desig_Scaffold18679       | 870                            | (G/A)       |
| 37652       | CadSNP13247    | <i>Desi</i>      | Ca_Desig_Scaffold18769       | 916                            | (C/A)       |
| 37653       | CadSNP13248    | <i>Desi</i>      | Ca_Desig_Scaffold18769       | 936                            | (C/T)       |
| 37654       | CadSNP13249    | <i>Desi</i>      | Ca_Desig_Scaffold18769       | 891                            | (A/T)       |
| 37655       | CadSNP13250    | <i>Desi</i>      | Ca_Desig_Scaffold18796       | 1523                           | (T/C)       |
| 37656       | CadSNP13251    | <i>Desi</i>      | Ca_Desig_Scaffold18796       | 1522                           | (C/A)       |
| 37657       | CadSNP13252    | <i>Desi</i>      | Ca_Desig_Scaffold18796       | 1517                           | (C/A)       |

| <b>S.N.</b> | <b>SNP IDs</b> | <b>Cultivars</b> | <b>Chromosomes/scaffolds</b> | <b>Physical positions (bp)</b> | <b>SNPs</b> |
|-------------|----------------|------------------|------------------------------|--------------------------------|-------------|
| 37658       | CadSNP13253    | <i>Desi</i>      | Ca_Desig_Scaffold18796       | 1508                           | (T/A)       |
| 37659       | CadSNP13254    | <i>Desi</i>      | Ca_Desig_Scaffold18796       | 1468                           | (A/T)       |
| 37660       | CadSNP13255    | <i>Desi</i>      | Ca_Desig_Scaffold18844       | 650                            | (A/C)       |
| 37661       | CadSNP13256    | <i>Desi</i>      | Ca_Desig_Scaffold18909       | 1717                           | (C/A)       |
| 37662       | CadSNP13257    | <i>Desi</i>      | Ca_Desig_Scaffold19474       | 1492                           | (A/G)       |
| 37663       | CadSNP13258    | <i>Desi</i>      | Ca_Desig_Scaffold19709       | 524                            | (C/T)       |
| 37664       | CadSNP13259    | <i>Desi</i>      | Ca_Desig_Scaffold19709       | 908                            | (G/A)       |
| 37665       | CadSNP13260    | <i>Desi</i>      | Ca_Desig_Scaffold19709       | 955                            | (C/T)       |
| 37666       | CadSNP13261    | <i>Desi</i>      | Ca_Desig_Scaffold19709       | 954                            | (G/A)       |
| 37667       | CadSNP13262    | <i>Desi</i>      | Ca_Desig_Scaffold19800       | 435                            | (G/T)       |
| 37668       | CadSNP13263    | <i>Desi</i>      | Ca_Desig_Scaffold19800       | 444                            | (C/G)       |
| 37669       | CadSNP13264    | <i>Desi</i>      | Ca_Desig_Scaffold19800       | 447                            | (C/A)       |
| 37670       | CadSNP13265    | <i>Desi</i>      | Ca_Desig_Scaffold19810       | 1444                           | (C/T)       |
| 37671       | CadSNP13266    | <i>Desi</i>      | Ca_Desig_Scaffold19810       | 1533                           | (C/A)       |
| 37672       | CadSNP13267    | <i>Desi</i>      | Ca_Desig_Scaffold19810       | 1570                           | (T/A)       |
| 37673       | CadSNP13268    | <i>Desi</i>      | Ca_Desig_Scaffold19830       | 1083                           | (C/T)       |
| 37674       | CadSNP13269    | <i>Desi</i>      | Ca_Desig_Scaffold19830       | 1087                           | (G/A)       |
| 37675       | CadSNP13270    | <i>Desi</i>      | Ca_Desig_Scaffold19830       | 1090                           | (C/T)       |
| 37676       | CadSNP13271    | <i>Desi</i>      | Ca_Desig_Scaffold19830       | 1128                           | (A/G)       |
| 37677       | CadSNP13272    | <i>Desi</i>      | Ca_Desig_Scaffold19865       | 974                            | (C/T)       |
| 37678       | CadSNP13273    | <i>Desi</i>      | Ca_Desig_Scaffold20089       | 560                            | (A/C)       |
| 37679       | CadSNP13274    | <i>Desi</i>      | Ca_Desig_Scaffold20089       | 599                            | (G/T)       |
| 37680       | CadSNP13275    | <i>Desi</i>      | Ca_Desig_Scaffold20089       | 563                            | (A/G)       |
| 37681       | CadSNP13276    | <i>Desi</i>      | Ca_Desig_Scaffold20089       | 677                            | (T/A)       |
| 37682       | CadSNP13277    | <i>Desi</i>      | Ca_Desig_Scaffold20089       | 712                            | (G/A)       |
| 37683       | CadSNP13278    | <i>Desi</i>      | Ca_Desig_Scaffold20089       | 740                            | (A/T)       |
| 37684       | CadSNP13279    | <i>Desi</i>      | Ca_Desig_Scaffold20260       | 1374                           | (A/T)       |
| 37685       | CadSNP13280    | <i>Desi</i>      | Ca_Desig_Scaffold20260       | 1425                           | (G/A)       |
| 37686       | CadSNP13281    | <i>Desi</i>      | Ca_Desig_Scaffold20260       | 1392                           | (C/T)       |
| 37687       | CadSNP13282    | <i>Desi</i>      | Ca_Desig_Scaffold20260       | 1378                           | (C/T)       |
| 37688       | CadSNP13283    | <i>Desi</i>      | Ca_Desig_Scaffold20432       | 1481                           | (C/G)       |
| 37689       | CadSNP13284    | <i>Desi</i>      | Ca_Desig_Scaffold20432       | 1465                           | (C/T)       |
| 37690       | CadSNP13285    | <i>Desi</i>      | Ca_Desig_Scaffold20432       | 1448                           | (A/T)       |
| 37691       | CadSNP13286    | <i>Desi</i>      | Ca_Desig_Scaffold20432       | 1441                           | (T/G)       |
| 37692       | CadSNP13287    | <i>Desi</i>      | Ca_Desig_Scaffold20432       | 1426                           | (G/A)       |
| 37693       | CadSNP13288    | <i>Desi</i>      | Ca_Desig_Scaffold20599       | 825                            | (A/T)       |
| 37694       | CadSNP13289    | <i>Desi</i>      | Ca_Desig_Scaffold20599       | 1007                           | (T/A)       |
| 37695       | CadSNP13290    | <i>Desi</i>      | Ca_Desig_Scaffold20677       | 1412                           | (G/A)       |

| <b>S.N.</b> | <b>SNP IDs</b> | <b>Cultivars</b> | <b>Chromosomes/scaffolds</b> | <b>Physical positions (bp)</b> | <b>SNPs</b> |
|-------------|----------------|------------------|------------------------------|--------------------------------|-------------|
| 37696       | CadSNP13291    | <i>Desi</i>      | Ca_Desig_Scaffold20748       | 1315                           | (G/A)       |
| 37697       | CadSNP13292    | <i>Desi</i>      | Ca_Desig_Scaffold20748       | 1279                           | (A/G)       |
| 37698       | CadSNP13293    | <i>Desi</i>      | Ca_Desig_Scaffold20857       | 679                            | (G/A)       |
| 37699       | CadSNP13294    | <i>Desi</i>      | Ca_Desig_Scaffold21104       | 776                            | (C/T)       |
| 37700       | CadSNP13295    | <i>Desi</i>      | Ca_Desig_Scaffold21104       | 782                            | (C/T)       |
| 37701       | CadSNP13296    | <i>Desi</i>      | Ca_Desig_Scaffold21180       | 389                            | (C/A)       |
| 37702       | CadSNP13297    | <i>Desi</i>      | Ca_Desig_Scaffold21223       | 885                            | (G/A)       |
| 37703       | CadSNP13298    | <i>Desi</i>      | Ca_Desig_Scaffold21344       | 707                            | (T/G)       |
| 37704       | CadSNP13299    | <i>Desi</i>      | Ca_Desig_Scaffold21533       | 65                             | (G/A)       |
| 37705       | CadSNP13300    | <i>Desi</i>      | Ca_Desig_Scaffold21930       | 346                            | (C/T)       |
| 37706       | CadSNP13301    | <i>Desi</i>      | Ca_Desig_Scaffold21930       | 370                            | (G/A)       |
| 37707       | CadSNP13302    | <i>Desi</i>      | Ca_Desig_Scaffold21930       | 372                            | (G/T)       |
| 37708       | CadSNP13303    | <i>Desi</i>      | Ca_Desig_Scaffold21930       | 417                            | (G/A)       |
| 37709       | CadSNP13304    | <i>Desi</i>      | Ca_Desig_Scaffold22140       | 1409                           | (A/T)       |
| 37710       | CadSNP13305    | <i>Desi</i>      | Ca_Desig_Scaffold22369       | 813                            | (T/A)       |
| 37711       | CadSNP13306    | <i>Desi</i>      | Ca_Desig_Scaffold22472       | 1327                           | (G/T)       |
| 37712       | CadSNP13307    | <i>Desi</i>      | Ca_Desig_Scaffold22621       | 847                            | (C/T)       |
| 37713       | CadSNP13308    | <i>Desi</i>      | Ca_Desig_Scaffold22621       | 824                            | (G/C)       |
| 37714       | CadSNP13309    | <i>Desi</i>      | Ca_Desig_Scaffold22621       | 820                            | (T/G)       |
| 37715       | CadSNP13310    | <i>Desi</i>      | Ca_Desig_Scaffold22621       | 806                            | (A/G)       |
| 37716       | CadSNP13311    | <i>Desi</i>      | Ca_Desig_Scaffold23282       | 1208                           | (C/A)       |
| 37717       | CadSNP13312    | <i>Desi</i>      | Ca_Desig_Scaffold23282       | 1227                           | (C/T)       |
| 37718       | CadSNP13313    | <i>Desi</i>      | Ca_Desig_Scaffold23439       | 480                            | (G/T)       |
| 37719       | CadSNP13314    | <i>Desi</i>      | Ca_Desig_Scaffold23439       | 546                            | (C/G)       |
| 37720       | CadSNP13315    | <i>Desi</i>      | Ca_Desig_Scaffold23443       | 699                            | (G/A)       |
| 37721       | CadSNP13316    | <i>Desi</i>      | Ca_Desig_Scaffold23695       | 340                            | (C/T)       |
| 37722       | CadSNP13317    | <i>Desi</i>      | Ca_Desig_Scaffold23830       | 785                            | (A/G)       |
| 37723       | CadSNP13318    | <i>Desi</i>      | Ca_Desig_Scaffold23830       | 834                            | (A/C)       |
| 37724       | CadSNP13319    | <i>Desi</i>      | Ca_Desig_Scaffold23830       | 840                            | (A/G)       |
| 37725       | CadSNP13320    | <i>Desi</i>      | Ca_Desig_Scaffold23921       | 326                            | (T/A)       |
| 37726       | CadSNP13321    | <i>Desi</i>      | Ca_Desig_Scaffold23921       | 350                            | (G/A)       |
| 37727       | CadSNP13322    | <i>Desi</i>      | Ca_Desig_Scaffold23922       | 1310                           | (A/G)       |
| 37728       | CadSNP13323    | <i>Desi</i>      | Ca_Desig_Scaffold23922       | 1336                           | (G/A)       |
| 37729       | CadSNP13324    | <i>Desi</i>      | Ca_Desig_Scaffold23922       | 1355                           | (T/G)       |
| 37730       | CadSNP13325    | <i>Desi</i>      | Ca_Desig_Scaffold23922       | 1361                           | (G/A)       |
| 37731       | CadSNP13326    | <i>Desi</i>      | Ca_Desig_Scaffold24254       | 499                            | (C/T)       |
| 37732       | CadSNP13327    | <i>Desi</i>      | Ca_Desig_Scaffold24254       | 508                            | (G/A)       |
| 37733       | CadSNP13328    | <i>Desi</i>      | Ca_Desig_Scaffold24254       | 552                            | (G/C)       |

| <b>S.N.</b> | <b>SNP IDs</b> | <b>Cultivars</b> | <b>Chromosomes/scaffolds</b> | <b>Physical positions (bp)</b> | <b>SNPs</b> |
|-------------|----------------|------------------|------------------------------|--------------------------------|-------------|
| 37734       | CadSNP13329    | <i>Desi</i>      | Ca_Desig_Scaffold24554       | 632                            | (A/T)       |
| 37735       | CadSNP13330    | <i>Desi</i>      | Ca_Desig_Scaffold24817       | 984                            | (C/T)       |
| 37736       | CadSNP13331    | <i>Desi</i>      | Ca_Desig_Scaffold24817       | 1039                           | (A/T)       |
| 37737       | CadSNP13332    | <i>Desi</i>      | Ca_Desig_Scaffold24829       | 577                            | (A/C)       |
| 37738       | CadSNP13333    | <i>Desi</i>      | Ca_Desig_Scaffold24829       | 760                            | (C/T)       |
| 37739       | CadSNP13334    | <i>Desi</i>      | Ca_Desig_Scaffold24829       | 744                            | (T/C)       |
| 37740       | CadSNP13335    | <i>Desi</i>      | Ca_Desig_Scaffold24963       | 816                            | (C/T)       |
| 37741       | CadSNP13336    | <i>Desi</i>      | Ca_Desig_Scaffold24994       | 397                            | (A/C)       |
| 37742       | CadSNP13337    | <i>Desi</i>      | Ca_Desig_Scaffold24994       | 469                            | (G/C)       |
| 37743       | CadSNP13338    | <i>Desi</i>      | Ca_Desig_Scaffold25004       | 756                            | (A/G)       |
| 37744       | CadSNP13339    | <i>Desi</i>      | Ca_Desig_Scaffold25004       | 772                            | (C/T)       |
| 37745       | CadSNP13340    | <i>Desi</i>      | Ca_Desig_Scaffold25004       | 827                            | (C/T)       |
| 37746       | CadSNP13341    | <i>Desi</i>      | Ca_Desig_Scaffold25004       | 899                            | (A/G)       |
| 37747       | CadSNP13342    | <i>Desi</i>      | Ca_Desig_Scaffold25004       | 944                            | (T/C)       |
| 37748       | CadSNP13343    | <i>Desi</i>      | Ca_Desig_Scaffold25004       | 1002                           | (C/T)       |
| 37749       | CadSNP13344    | <i>Desi</i>      | Ca_Desig_Scaffold25004       | 989                            | (G/A)       |
| 37750       | CadSNP13345    | <i>Desi</i>      | Ca_Desig_Scaffold25004       | 1034                           | (C/T)       |
| 37751       | CadSNP13346    | <i>Desi</i>      | Ca_Desig_Scaffold25004       | 1050                           | (G/A)       |
| 37752       | CadSNP13347    | <i>Desi</i>      | Ca_Desig_Scaffold25004       | 1111                           | (C/T)       |
| 37753       | CadSNP13348    | <i>Desi</i>      | Ca_Desig_Scaffold25157       | 734                            | (A/G)       |
| 37754       | CadSNP13349    | <i>Desi</i>      | Ca_Desig_Scaffold25255       | 751                            | (C/T)       |
| 37755       | CadSNP13350    | <i>Desi</i>      | Ca_Desig_Scaffold25255       | 787                            | (C/T)       |
| 37756       | CadSNP13351    | <i>Desi</i>      | Ca_Desig_Scaffold25255       | 829                            | (T/C)       |
| 37757       | CadSNP13352    | <i>Desi</i>      | Ca_Desig_Scaffold25497       | 668                            | (C/A)       |
| 37758       | CadSNP13353    | <i>Desi</i>      | Ca_Desig_Scaffold25497       | 743                            | (T/C)       |
| 37759       | CadSNP13354    | <i>Desi</i>      | Ca_Desig_Scaffold25634       | 183                            | (C/T)       |
| 37760       | CadSNP13355    | <i>Desi</i>      | Ca_Desig_Scaffold25810       | 391                            | (G/C)       |
| 37761       | CadSNP13356    | <i>Desi</i>      | Ca_Desig_Scaffold26119       | 556                            | (T/C)       |
| 37762       | CadSNP13357    | <i>Desi</i>      | Ca_Desig_Scaffold26119       | 570                            | (C/A)       |
| 37763       | CadSNP13358    | <i>Desi</i>      | Ca_Desig_Scaffold26119       | 572                            | (G/A)       |
| 37764       | CadSNP13359    | <i>Desi</i>      | Ca_Desig_Scaffold26121       | 700                            | (G/C)       |
| 37765       | CadSNP13360    | <i>Desi</i>      | Ca_Desig_Scaffold26121       | 843                            | (G/A)       |
| 37766       | CadSNP13361    | <i>Desi</i>      | Ca_Desig_Scaffold26250       | 343                            | (C/T)       |
| 37767       | CadSNP13362    | <i>Desi</i>      | Ca_Desig_Scaffold26303       | 381                            | (C/T)       |
| 37768       | CadSNP13363    | <i>Desi</i>      | Ca_Desig_Scaffold26303       | 382                            | (C/T)       |
| 37769       | CadSNP13364    | <i>Desi</i>      | Ca_Desig_Scaffold26303       | 443                            | (G/A)       |
| 37770       | CadSNP13365    | <i>Desi</i>      | Ca_Desig_Scaffold26331       | 325                            | (T/A)       |
| 37771       | CadSNP13366    | <i>Desi</i>      | Ca_Desig_Scaffold26728       | 977                            | (C/T)       |

| <b>S.N.</b> | <b>SNP IDs</b> | <b>Cultivars</b> | <b>Chromosomes/scaffolds</b> | <b>Physical positions (bp)</b> | <b>SNPs</b> |
|-------------|----------------|------------------|------------------------------|--------------------------------|-------------|
| 37772       | CadSNP13367    | <i>Desi</i>      | Ca_Desig_Scaffold26728       | 1023                           | (G/A)       |
| 37773       | CadSNP13368    | <i>Desi</i>      | Ca_Desig_Scaffold26728       | 1031                           | (G/A)       |
| 37774       | CadSNP13369    | <i>Desi</i>      | Ca_Desig_Scaffold26728       | 1127                           | (A/G)       |
| 37775       | CadSNP13370    | <i>Desi</i>      | Ca_Desig_Scaffold26728       | 1142                           | (G/A)       |
| 37776       | CadSNP13371    | <i>Desi</i>      | Ca_Desig_Scaffold26728       | 1155                           | (G/C)       |
| 37777       | CadSNP13372    | <i>Desi</i>      | Ca_Desig_Scaffold26754       | 252                            | (A/G)       |
| 37778       | CadSNP13373    | <i>Desi</i>      | Ca_Desig_Scaffold26800       | 738                            | (C/T)       |
| 37779       | CadSNP13374    | <i>Desi</i>      | Ca_Desig_Scaffold26800       | 705                            | (G/A)       |
| 37780       | CadSNP13375    | <i>Desi</i>      | Ca_Desig_Scaffold26800       | 665                            | (G/T)       |
| 37781       | CadSNP13376    | <i>Desi</i>      | Ca_Desig_Scaffold27355       | 593                            | (A/G)       |
| 37782       | CadSNP13377    | <i>Desi</i>      | Ca_Desig_Scaffold27355       | 615                            | (A/T)       |
| 37783       | CadSNP13378    | <i>Desi</i>      | Ca_Desig_Scaffold27355       | 655                            | (A/C)       |
| 37784       | CadSNP13379    | <i>Desi</i>      | Ca_Desig_Scaffold27395       | 1114                           | (A/C)       |
| 37785       | CadSNP13380    | <i>Desi</i>      | Ca_Desig_Scaffold27528       | 1074                           | (A/T)       |
| 37786       | CadSNP13381    | <i>Desi</i>      | Ca_Desig_Scaffold27713       | 1164                           | (C/A)       |
| 37787       | CadSNP13382    | <i>Desi</i>      | Ca_Desig_Scaffold27713       | 1168                           | (T/A)       |
| 37788       | CadSNP13383    | <i>Desi</i>      | Ca_Desig_Scaffold27713       | 1160                           | (C/A)       |
| 37789       | CadSNP13384    | <i>Desi</i>      | Ca_Desig_Scaffold27916       | 227                            | (A/T)       |
| 37790       | CadSNP13385    | <i>Desi</i>      | Ca_Desig_Scaffold27975       | 358                            | (T/C)       |
| 37791       | CadSNP13386    | <i>Desi</i>      | Ca_Desig_Scaffold27975       | 367                            | (C/A)       |
| 37792       | CadSNP13387    | <i>Desi</i>      | Ca_Desig_Scaffold27975       | 551                            | (G/T)       |
| 37793       | CadSNP13388    | <i>Desi</i>      | Ca_Desig_Scaffold27975       | 589                            | (G/A)       |
| 37794       | CadSNP13389    | <i>Desi</i>      | Ca_Desig_Scaffold28068       | 745                            | (T/C)       |
| 37795       | CadSNP13390    | <i>Desi</i>      | Ca_Desig_Scaffold28068       | 808                            | (G/A)       |
| 37796       | CadSNP13391    | <i>Desi</i>      | Ca_Desig_Scaffold28189       | 780                            | (C/T)       |
| 37797       | CadSNP13392    | <i>Desi</i>      | Ca_Desig_Scaffold28252       | 613                            | (C/T)       |
| 37798       | CadSNP13393    | <i>Desi</i>      | Ca_Desig_Scaffold28399       | 21                             | (T/C)       |
| 37799       | CadSNP13394    | <i>Desi</i>      | Ca_Desig_Scaffold28419       | 973                            | (C/T)       |
| 37800       | CadSNP13395    | <i>Desi</i>      | Ca_Desig_Scaffold28553       | 270                            | (T/C)       |
| 37801       | CadSNP13396    | <i>Desi</i>      | Ca_Desig_Scaffold28553       | 408                            | (C/T)       |
| 37802       | CadSNP13397    | <i>Desi</i>      | Ca_Desig_Scaffold28553       | 384                            | (C/A)       |
| 37803       | CadSNP13398    | <i>Desi</i>      | Ca_Desig_Scaffold28553       | 380                            | (G/T)       |
| 37804       | CadSNP13399    | <i>Desi</i>      | Ca_Desig_Scaffold28553       | 373                            | (A/C)       |
| 37805       | CadSNP13400    | <i>Desi</i>      | Ca_Desig_Scaffold28553       | 354                            | (C/T)       |
| 37806       | CadSNP13401    | <i>Desi</i>      | Ca_Desig_Scaffold28710       | 904                            | (C/T)       |
| 37807       | CadSNP13402    | <i>Desi</i>      | Ca_Desig_Scaffold28710       | 959                            | (C/A)       |
| 37808       | CadSNP13403    | <i>Desi</i>      | Ca_Desig_Scaffold28710       | 960                            | (G/A)       |
| 37809       | CadSNP13404    | <i>Desi</i>      | Ca_Desig_Scaffold28710       | 1003                           | (A/G)       |

| <b>S.N.</b> | <b>SNP IDs</b> | <b>Cultivars</b> | <b>Chromosomes/scaffolds</b> | <b>Physical positions (bp)</b> | <b>SNPs</b> |
|-------------|----------------|------------------|------------------------------|--------------------------------|-------------|
| 37810       | CadSNP13405    | <i>Desi</i>      | Ca_Desig_Scaffold29246       | 362                            | (C/T)       |
| 37811       | CadSNP13406    | <i>Desi</i>      | Ca_Desig_Scaffold29344       | 70                             | (G/A)       |
| 37812       | CadSNP13407    | <i>Desi</i>      | Ca_Desig_Scaffold29344       | 50                             | (G/A)       |
| 37813       | CadSNP13408    | <i>Desi</i>      | Ca_Desig_Scaffold29344       | 31                             | (C/T)       |
| 37814       | CadSNP13409    | <i>Desi</i>      | Ca_Desig_Scaffold29344       | 30                             | (G/A)       |
| 37815       | CadSNP13410    | <i>Desi</i>      | Ca_Desig_Scaffold29387       | 594                            | (T/C)       |
| 37816       | CadSNP13411    | <i>Desi</i>      | Ca_Desig_Scaffold29549       | 804                            | (G/A)       |
| 37817       | CadSNP13412    | <i>Desi</i>      | Ca_Desig_Scaffold29549       | 869                            | (G/T)       |
| 37818       | CadSNP13413    | <i>Desi</i>      | Ca_Desig_Scaffold29682       | 309                            | (G/A)       |
| 37819       | CadSNP13414    | <i>Desi</i>      | Ca_Desig_Scaffold29815       | 324                            | (A/G)       |
| 37820       | CadSNP13415    | <i>Desi</i>      | Ca_Desig_Scaffold30384       | 250                            | (C/T)       |
| 37821       | CadSNP13416    | <i>Desi</i>      | Ca_Desig_Scaffold30384       | 298                            | (C/T)       |
| 37822       | CadSNP13417    | <i>Desi</i>      | Ca_Desig_Scaffold30559       | 997                            | (T/A)       |
| 37823       | CadSNP13418    | <i>Desi</i>      | Ca_Desig_Scaffold30611       | 393                            | (G/A)       |
| 37824       | CadSNP13419    | <i>Desi</i>      | Ca_Desig_Scaffold30720       | 837                            | (A/G)       |
| 37825       | CadSNP13420    | <i>Desi</i>      | Ca_Desig_Scaffold30793       | 640                            | (C/T)       |
| 37826       | CadSNP13421    | <i>Desi</i>      | Ca_Desig_Scaffold30793       | 602                            | (G/A)       |
| 37827       | CadSNP13422    | <i>Desi</i>      | Ca_Desig_Scaffold30793       | 581                            | (G/T)       |
| 37828       | CadSNP13423    | <i>Desi</i>      | Ca_Desig_Scaffold31074       | 529                            | (A/G)       |
| 37829       | CadSNP13424    | <i>Desi</i>      | Ca_Desig_Scaffold31201       | 962                            | (C/T)       |
| 37830       | CadSNP13425    | <i>Desi</i>      | Ca_Desig_Scaffold31305       | 846                            | (C/T)       |
| 37831       | CadSNP13426    | <i>Desi</i>      | Ca_Desig_Scaffold31408       | 671                            | (T/G)       |
| 37832       | CadSNP13427    | <i>Desi</i>      | Ca_Desig_Scaffold31955       | 584                            | (C/A)       |
| 37833       | CadSNP13428    | <i>Desi</i>      | Ca_Desig_Scaffold31955       | 610                            | (A/T)       |
| 37834       | CadSNP13429    | <i>Desi</i>      | Ca_Desig_Scaffold31955       | 617                            | (G/A)       |
| 37835       | CadSNP13430    | <i>Desi</i>      | Ca_Desig_Scaffold31955       | 631                            | (T/C)       |
| 37836       | CadSNP13431    | <i>Desi</i>      | Ca_Desig_Scaffold32029       | 498                            | (C/T)       |
| 37837       | CadSNP13432    | <i>Desi</i>      | Ca_Desig_Scaffold32029       | 472                            | (A/T)       |
| 37838       | CadSNP13433    | <i>Desi</i>      | Ca_Desig_Scaffold32029       | 453                            | (C/A)       |
| 37839       | CadSNP13434    | <i>Desi</i>      | Ca_Desig_Scaffold32170       | 413                            | (C/G)       |
| 37840       | CadSNP13435    | <i>Desi</i>      | Ca_Desig_Scaffold32231       | 614                            | (C/G)       |
| 37841       | CadSNP13436    | <i>Desi</i>      | Ca_Desig_Scaffold32231       | 638                            | (C/T)       |
| 37842       | CadSNP13437    | <i>Desi</i>      | Ca_Desig_Scaffold32231       | 642                            | (G/A)       |
| 37843       | CadSNP13438    | <i>Desi</i>      | Ca_Desig_Scaffold32231       | 648                            | (C/T)       |
| 37844       | CadSNP13439    | <i>Desi</i>      | Ca_Desig_Scaffold32231       | 728                            | (A/T)       |
| 37845       | CadSNP13440    | <i>Desi</i>      | Ca_Desig_Scaffold32231       | 684                            | (C/A)       |
| 37846       | CadSNP13441    | <i>Desi</i>      | Ca_Desig_Scaffold32231       | 680                            | (C/T)       |
| 37847       | CadSNP13442    | <i>Desi</i>      | Ca_Desig_Scaffold32231       | 654                            | (C/T)       |

| <b>S.N.</b> | <b>SNP IDs</b> | <b>Cultivars</b> | <b>Chromosomes/scaffolds</b> | <b>Physical positions (bp)</b> | <b>SNPs</b> |
|-------------|----------------|------------------|------------------------------|--------------------------------|-------------|
| 37848       | CadSNP13443    | <i>Desi</i>      | Ca_Desig_Scaffold32231       | 730                            | (G/A)       |
| 37849       | CadSNP13444    | <i>Desi</i>      | Ca_Desig_Scaffold32231       | 729                            | (G/A)       |
| 37850       | CadSNP13445    | <i>Desi</i>      | Ca_Desig_Scaffold32292       | 336                            | (C/T)       |
| 37851       | CadSNP13446    | <i>Desi</i>      | Ca_Desig_Scaffold32488       | 757                            | (G/T)       |
| 37852       | CadSNP13447    | <i>Desi</i>      | Ca_Desig_Scaffold32742       | 451                            | (C/T)       |
| 37853       | CadSNP13448    | <i>Desi</i>      | Ca_Desig_Scaffold32922       | 822                            | (C/T)       |
| 37854       | CadSNP13449    | <i>Desi</i>      | Ca_Desig_Scaffold32922       | 887                            | (T/C)       |
| 37855       | CadSNP13450    | <i>Desi</i>      | Ca_Desig_Scaffold32922       | 817                            | (T/A)       |
| 37856       | CadSNP13451    | <i>Desi</i>      | Ca_Desig_Scaffold33002       | 633                            | (A/G)       |
| 37857       | CadSNP13452    | <i>Desi</i>      | Ca_Desig_Scaffold33030       | 833                            | (A/G)       |
| 37858       | CadSNP13453    | <i>Desi</i>      | Ca_Desig_Scaffold33287       | 791                            | (T/A)       |
| 37859       | CadSNP13454    | <i>Desi</i>      | Ca_Desig_Scaffold33819       | 523                            | (G/C)       |
| 37860       | CadSNP13455    | <i>Desi</i>      | Ca_Desig_Scaffold34430       | 662                            | (G/T)       |
| 37861       | CadSNP13456    | <i>Desi</i>      | Ca_Desig_Scaffold34904       | 794                            | (T/A)       |
| 37862       | CadSNP13457    | <i>Desi</i>      | Ca_Desig_Scaffold34904       | 809                            | (T/A)       |
| 37863       | CadSNP13458    | <i>Desi</i>      | Ca_Desig_Scaffold35437       | 548                            | (G/A)       |
| 37864       | CadSNP13459    | <i>Desi</i>      | Ca_Desig_Scaffold35437       | 534                            | (C/T)       |
| 37865       | CadSNP13460    | <i>Desi</i>      | Ca_Desig_Scaffold35437       | 582                            | (A/G)       |
| 37866       | CadSNP13461    | <i>Desi</i>      | Ca_Desig_Scaffold35538       | 465                            | (G/A)       |
| 37867       | CadSNP13462    | <i>Desi</i>      | Ca_Desig_Scaffold35948       | 641                            | (G/A)       |
| 37868       | CadSNP13463    | <i>Desi</i>      | Ca_Desig_Scaffold37217       | 481                            | (T/C)       |
| 37869       | CadSNP13464    | <i>Desi</i>      | Ca_Desig_Scaffold37300       | 555                            | (A/G)       |
| 37870       | CadSNP13465    | <i>Desi</i>      | Ca_Desig_Scaffold37300       | 554                            | (C/T)       |
| 37871       | CadSNP13466    | <i>Desi</i>      | Ca_Desig_Scaffold37822       | 285                            | (G/A)       |
| 37872       | CadSNP13467    | <i>Desi</i>      | Ca_Desig_Scaffold37878       | 320                            | (T/A)       |
| 37873       | CadSNP13468    | <i>Desi</i>      | Ca_Desig_Scaffold37878       | 334                            | (G/C)       |
| 37874       | CadSNP13469    | <i>Desi</i>      | Ca_Desig_Scaffold37878       | 559                            | (C/T)       |
| 37875       | CadSNP13470    | <i>Desi</i>      | Ca_Desig_Scaffold37878       | 689                            | (T/G)       |
| 37876       | CadSNP13471    | <i>Desi</i>      | Ca_Desig_Scaffold38042       | 803                            | (T/G)       |
| 37877       | CadSNP13472    | <i>Desi</i>      | Ca_Desig_Scaffold38042       | 802                            | (T/A)       |
| 37878       | CadSNP13473    | <i>Desi</i>      | Ca_Desig_Scaffold38182       | 10                             | (T/C)       |
| 37879       | CadSNP13474    | <i>Desi</i>      | Ca_Desig_Scaffold38400       | 784                            | (A/G)       |
| 37880       | CadSNP13475    | <i>Desi</i>      | Ca_Desig_Scaffold38480       | 739                            | (C/A)       |
| 37881       | CadSNP13476    | <i>Desi</i>      | Ca_Desig_Scaffold38480       | 815                            | (T/G)       |
| 37882       | CadSNP13477    | <i>Desi</i>      | Ca_Desig_Scaffold39056       | 697                            | (G/A)       |
| 37883       | CadSNP13478    | <i>Desi</i>      | Ca_Desig_Scaffold39064       | 597                            | (C/T)       |
| 37884       | CadSNP13479    | <i>Desi</i>      | Ca_Desig_Scaffold39879       | 488                            | (C/T)       |
| 37885       | CadSNP13480    | <i>Desi</i>      | Ca_Desig_Scaffold40313       | 245                            | (T/C)       |

| <b>S.N.</b> | <b>SNP IDs</b> | <b>Cultivars</b> | <b>Chromosomes/scaffolds</b> | <b>Physical positions (bp)</b> | <b>SNPs</b> |
|-------------|----------------|------------------|------------------------------|--------------------------------|-------------|
| 37886       | CadSNP13481    | <i>Desi</i>      | Ca_Desig_Scaffold40313       | 213                            | (G/C)       |
| 37887       | CadSNP13482    | <i>Desi</i>      | Ca_Desig_Scaffold40463       | 171                            | (G/T)       |
| 37888       | CadSNP13483    | <i>Desi</i>      | Ca_Desig_Scaffold40758       | 812                            | (G/A)       |
| 37889       | CadSNP13484    | <i>Desi</i>      | Ca_Desig_Scaffold41141       | 621                            | (A/G)       |
| 37890       | CadSNP13485    | <i>Desi</i>      | Ca_Desig_Scaffold41141       | 608                            | (C/T)       |
| 37891       | CadSNP13486    | <i>Desi</i>      | Ca_Desig_Scaffold41269       | 360                            | (A/G)       |
| 37892       | CadSNP13487    | <i>Desi</i>      | Ca_Desig_Scaffold41733       | 687                            | (G/A)       |
| 37893       | CadSNP13488    | <i>Desi</i>      | Ca_Desig_Scaffold41756       | 703                            | (T/A)       |
| 37894       | CadSNP13489    | <i>Desi</i>      | Ca_Desig_Scaffold42097       | 118                            | (C/T)       |
| 37895       | CadSNP13490    | <i>Desi</i>      | Ca_Desig_Scaffold42202       | 338                            | (G/A)       |
| 37896       | CadSNP13491    | <i>Desi</i>      | Ca_Desig_Scaffold42442       | 774                            | (C/T)       |
| 37897       | CadSNP13492    | <i>Desi</i>      | Ca_Desig_Scaffold42669       | 578                            | (G/A)       |
| 37898       | CadSNP13493    | <i>Desi</i>      | Ca_Desig_Scaffold42739       | 377                            | (T/C)       |
| 37899       | CadSNP13494    | <i>Desi</i>      | Ca_Desig_Scaffold42739       | 526                            | (G/A)       |
| 37900       | CadSNP13495    | <i>Desi</i>      | Ca_Desig_Scaffold42739       | 495                            | (G/A)       |
| 37901       | CadSNP13496    | <i>Desi</i>      | Ca_Desig_Scaffold43101       | 749                            | (C/A)       |
| 37902       | CadSNP13497    | <i>Desi</i>      | Ca_Desig_Scaffold43101       | 725                            | (G/A)       |
| 37903       | CadSNP13498    | <i>Desi</i>      | Ca_Desig_Scaffold43309       | 550                            | (C/A)       |
| 37904       | CadSNP13499    | <i>Desi</i>      | Ca_Desig_Scaffold43309       | 574                            | (T/G)       |
| 37905       | CadSNP13500    | <i>Desi</i>      | Ca_Desig_Scaffold43671       | 737                            | (G/A)       |
| 37906       | CadSNP13501    | <i>Desi</i>      | Ca_Desig_Scaffold43744       | 419                            | (G/A)       |
| 37907       | CadSNP13502    | <i>Desi</i>      | Ca_Desig_Scaffold43875       | 520                            | (T/C)       |
| 37908       | CadSNP13503    | <i>Desi</i>      | Ca_Desig_Scaffold43875       | 590                            | (C/G)       |
| 37909       | CadSNP13504    | <i>Desi</i>      | Ca_Desig_Scaffold43875       | 591                            | (G/T)       |
| 37910       | CadSNP13505    | <i>Desi</i>      | Ca_Desig_Scaffold44132       | 746                            | (C/T)       |
| 37911       | CadSNP13506    | <i>Desi</i>      | Ca_Desig_Scaffold44461       | 396                            | (A/G)       |
| 37912       | CadSNP13507    | <i>Desi</i>      | Ca_Desig_Scaffold44461       | 365                            | (C/T)       |
| 37913       | CadSNP13508    | <i>Desi</i>      | Ca_Desig_Scaffold44461       | 348                            | (C/T)       |
| 37914       | CadSNP13509    | <i>Desi</i>      | Ca_Desig_Scaffold44461       | 378                            | (C/G)       |
| 37915       | CadSNP13510    | <i>Desi</i>      | Ca_Desig_Scaffold44945       | 300                            | (T/C)       |
| 37916       | CadSNP13511    | <i>Desi</i>      | Ca_Desig_Scaffold45025       | 281                            | (G/A)       |
| 37917       | CadSNP13512    | <i>Desi</i>      | Ca_Desig_Scaffold45246       | 497                            | (A/G)       |
| 37918       | CadSNP13513    | <i>Desi</i>      | Ca_Desig_Scaffold46094       | 643                            | (T/C)       |
| 37919       | CadSNP13514    | <i>Desi</i>      | Ca_Desig_Scaffold46306       | 361                            | (C/G)       |
| 37920       | CadSNP13515    | <i>Desi</i>      | Ca_Desig_Scaffold46658       | 673                            | (G/A)       |
| 37921       | CadSNP13516    | <i>Desi</i>      | Ca_Desig_Scaffold46822       | 588                            | (C/G)       |
| 37922       | CadSNP13517    | <i>Desi</i>      | Ca_Desig_Scaffold46822       | 635                            | (G/T)       |
| 37923       | CadSNP13518    | <i>Desi</i>      | Ca_Desig_Scaffold47543       | 721                            | (A/C)       |



| <b>S.N.</b> | <b>SNP IDs</b> | <b>Cultivars</b> | <b>Chromosomes/scaffolds</b> | <b>Physical positions (bp)</b> | <b>SNPs</b> |
|-------------|----------------|------------------|------------------------------|--------------------------------|-------------|
| 37924       | CadSNP13519    | <i>Desi</i>      | Ca_Desig_Scaffold48244       | 585                            | (C/A)       |
| 37925       | CadSNP13520    | <i>Desi</i>      | Ca_Desig_Scaffold48712       | 667                            | (T/C)       |
| 37926       | CadSNP13521    | <i>Desi</i>      | Ca_Desig_Scaffold49023       | 503                            | (C/A)       |
| 37927       | CadSNP13522    | <i>Desi</i>      | Ca_Desig_Scaffold49478       | 266                            | (C/G)       |
| 37928       | CadSNP13523    | <i>Desi</i>      | Ca_Desig_Scaffold49745       | 452                            | (C/T)       |
| 37929       | CadSNP13524    | <i>Desi</i>      | Ca_Desig_Scaffold49745       | 445                            | (A/G)       |
| 37930       | CadSNP13525    | <i>Desi</i>      | Ca_Desig_Scaffold49745       | 436                            | (C/T)       |
| 37931       | CadSNP13526    | <i>Desi</i>      | Ca_Desig_Scaffold49745       | 418                            | (G/A)       |
| 37932       | CadSNP13527    | <i>Desi</i>      | Ca_Desig_Scaffold49745       | 415                            | (C/T)       |
| 37933       | CadSNP13528    | <i>Desi</i>      | Ca_Desig_Scaffold49745       | 414                            | (G/T)       |
| 37934       | CadSNP13529    | <i>Desi</i>      | Ca_Desig_Scaffold49745       | 454                            | (T/C)       |
| 37935       | CadSNP13530    | <i>Desi</i>      | Ca_Desig_Scaffold50638       | 510                            | (C/T)       |
| 37936       | CadSNP13531    | <i>Desi</i>      | Ca_Desig_Scaffold50785       | 634                            | (A/C)       |
| 37937       | CadSNP13532    | <i>Desi</i>      | Ca_Desig_Scaffold51374       | 446                            | (C/G)       |
| 37938       | CadSNP13533    | <i>Desi</i>      | Ca_Desig_Scaffold51374       | 438                            | (G/A)       |
| 37939       | CadSNP13534    | <i>Desi</i>      | Ca_Desig_Scaffold51516       | 240                            | (G/T)       |
| 37940       | CadSNP13535    | <i>Desi</i>      | Ca_Desig_Scaffold52176       | 564                            | (A/G)       |
| 37941       | CadSNP13536    | <i>Desi</i>      | Ca_Desig_Scaffold52463       | 611                            | (T/C)       |
| 37942       | CadSNP13537    | <i>Desi</i>      | Ca_Desig_Scaffold52878       | 490                            | (T/C)       |
| 37943       | CadSNP13538    | <i>Desi</i>      | Ca_Desig_Scaffold53048       | 566                            | (T/A)       |
| 37944       | CadSNP13539    | <i>Desi</i>      | Ca_Desig_Scaffold53452       | 279                            | (C/T)       |
| 37945       | CadSNP13540    | <i>Desi</i>      | Ca_Desig_Scaffold53674       | 486                            | (G/A)       |
| 37946       | CadSNP13541    | <i>Desi</i>      | Ca_Desig_Scaffold53899       | 600                            | (C/T)       |
| 37947       | CadSNP13542    | <i>Desi</i>      | Ca_Desig_Scaffold53975       | 383                            | (G/A)       |
| 37948       | CadSNP13543    | <i>Desi</i>      | Ca_Desig_Scaffold53975       | 399                            | (C/T)       |
| 37949       | CadSNP13544    | <i>Desi</i>      | Ca_Desig_Scaffold54505       | 12                             | (C/G)       |
| 37950       | CadSNP13545    | <i>Desi</i>      | Ca_Desig_Scaffold54733       | 516                            | (C/T)       |
| 37951       | CadSNP13546    | <i>Desi</i>      | Ca_Desig_Scaffold54733       | 627                            | (G/A)       |
| 37952       | CadSNP13547    | <i>Desi</i>      | Ca_Desig_Scaffold55053       | 531                            | (A/T)       |
| 37953       | CadSNP13548    | <i>Desi</i>      | Ca_Desig_Scaffold56250       | 402                            | (G/T)       |
| 37954       | CadSNP13549    | <i>Desi</i>      | Ca_Desig_Scaffold56837       | 280                            | (C/T)       |
| 37955       | CadSNP13550    | <i>Desi</i>      | Ca_Desig_Scaffold57082       | 604                            | (G/A)       |
| 37956       | CadSNP13551    | <i>Desi</i>      | Ca_Desig_Scaffold57669       | 363                            | (T/A)       |
| 37957       | CadSNP13552    | <i>Desi</i>      | Ca_Desig_Scaffold58124       | 542                            | (G/T)       |
| 37958       | CadSNP13553    | <i>Desi</i>      | Ca_Desig_Scaffold60575       | 425                            | (C/A)       |
| 37959       | CadSNP13554    | <i>Desi</i>      | Ca_Desig_Scaffold60695       | 494                            | (G/C)       |
| 37960       | CadSNP13555    | <i>Desi</i>      | Ca_Desig_Scaffold60788       | 388                            | (A/G)       |
| 37961       | CadSNP13556    | <i>Desi</i>      | Ca_Desig_Scaffold61552       | 315                            | (A/C)       |

| <b>S.N.</b> | <b>SNP IDs</b> | <b>Cultivars</b> | <b>Chromosomes/scaffolds</b> | <b>Physical positions (bp)</b> | <b>SNPs</b> |
|-------------|----------------|------------------|------------------------------|--------------------------------|-------------|
| 37962       | CadSNP13557    | <i>Desi</i>      | Ca_Desig_Scaffold61552       | 342                            | (G/A)       |
| 37963       | CadSNP13558    | <i>Desi</i>      | Ca_Desig_Scaffold62018       | 352                            | (T/A)       |
| 37964       | CadSNP13559    | <i>Desi</i>      | Ca_Desig_Scaffold62150       | 327                            | (G/A)       |
| 37965       | CadSNP13560    | <i>Desi</i>      | Ca_Desig_Scaffold62237       | 262                            | (G/A)       |
| 37966       | CadSNP13561    | <i>Desi</i>      | Ca_Desig_Scaffold62517       | 331                            | (T/A)       |
| 37967       | CadSNP13562    | <i>Desi</i>      | Ca_Desig_Scaffold63416       | 368                            | (T/C)       |
| 37968       | CadSNP13563    | <i>Desi</i>      | Ca_Desig_Scaffold63520       | 328                            | (G/T)       |
| 37969       | CadSNP13564    | <i>Desi</i>      | Ca_Desig_Scaffold63979       | 253                            | (C/T)       |
| 37970       | CadSNP13565    | <i>Desi</i>      | Ca_Desig_Scaffold63979       | 251                            | (G/T)       |
| 37971       | CadSNP13566    | <i>Desi</i>      | Ca_Desig_Scaffold65758       | 322                            | (T/C)       |
| 37972       | CadSNP13567    | <i>Desi</i>      | Ca_Desig_Scaffold65758       | 294                            | (A/G)       |
| 37973       | CadSNP13568    | <i>Desi</i>      | Ca_Desig_Scaffold65877       | 487                            | (T/G)       |
| 37974       | CadSNP13569    | <i>Desi</i>      | Ca_Desig_Scaffold66217       | 483                            | (C/T)       |
| 37975       | CadSNP13570    | <i>Desi</i>      | Ca_Desig_Scaffold66217       | 513                            | (T/C)       |
| 37976       | CadSNP13571    | <i>Desi</i>      | Ca_Desig_Scaffold67561       | 406                            | (G/A)       |
| 37977       | CadSNP13572    | <i>Desi</i>      | Ca_Desig_Scaffold67598       | 339                            | (C/A)       |
| 37978       | CadSNP13573    | <i>Desi</i>      | Ca_Desig_Scaffold67598       | 375                            | (A/G)       |
| 37979       | CadSNP13574    | <i>Desi</i>      | Ca_Desig_Scaffold67680       | 311                            | (T/C)       |
| 37980       | CadSNP13575    | <i>Desi</i>      | Ca_Desig_Scaffold67680       | 289                            | (A/G)       |
| 37981       | CadSNP13576    | <i>Desi</i>      | Ca_Desig_Scaffold67680       | 267                            | (G/A)       |
| 37982       | CadSNP13577    | <i>Desi</i>      | Ca_Desig_Scaffold69479       | 492                            | (C/A)       |
| 37983       | CadSNP13578    | <i>Desi</i>      | Ca_Desig_Scaffold69479       | 507                            | (C/T)       |
| 37984       | CadSNP13579    | <i>Desi</i>      | Ca_Desig_Scaffold74426       | 312                            | (C/A)       |
| 37985       | CadSNP13580    | <i>Desi</i>      | Ca_Desig_Scaffold74426       | 430                            | (A/T)       |
| 37986       | CadSNP13581    | <i>Desi</i>      | Ca_Desig_Scaffold75819       | 407                            | (C/T)       |
| 37987       | CadSNP13582    | <i>Desi</i>      | Ca_Desig_Scaffold76157       | 295                            | (C/G)       |
| 37988       | CadSNP13583    | <i>Desi</i>      | Ca_Desig_Scaffold78148       | 357                            | (T/C)       |
| 37989       | CadSNP13584    | <i>Desi</i>      | Ca_Desig_Scaffold78466       | 16                             | (C/T)       |
| 37990       | CadSNP13585    | <i>Desi</i>      | Ca_Desig_Scaffold81266       | 371                            | (A/G)       |
| 37991       | CadSNP13586    | <i>Desi</i>      | Ca_Desig_Scaffold81770       | 42                             | (C/A)       |
| 37992       | CadSNP13587    | <i>Desi</i>      | Ca_Desig_Scaffold83405       | 288                            | (C/A)       |
| 37993       | CadSNP13588    | <i>Desi</i>      | Ca_Desig_Scaffold84366       | 403                            | (T/A)       |
| 37994       | CadSNP13589    | <i>Desi</i>      | Ca_Desig_Scaffold84366       | 409                            | (G/A)       |
| 37995       | CadSNP13590    | <i>Desi</i>      | Ca_Desig_Scaffold86166       | 337                            | (C/T)       |
| 37996       | CadSNP13591    | <i>Desi</i>      | Ca_Desig_Scaffold86747       | 359                            | (C/T)       |
| 37997       | CadSNP13592    | <i>Desi</i>      | Ca_Desig_Scaffold92957       | 323                            | (C/T)       |
| 37998       | CadSNP13593    | <i>Desi</i>      | Ca_Desig_Scaffold95841       | 38                             | (A/T)       |
| 37999       | CadSNP13594    | <i>Desi</i>      | Ca_Desig_denovo              | 1691                           | (A/G)       |

| <b>S.N.</b> | <b>SNP IDs</b> | <b>Cultivars</b> | <b>Chromosomes/scaffolds</b> | <b>Physical positions (bp)</b> | <b>SNPs</b> |
|-------------|----------------|------------------|------------------------------|--------------------------------|-------------|
| 38000       | CadSNP13595    | <i>Desi</i>      | Ca_Desig_denovo              | 1706                           | (A/G)       |
| 38001       | CadSNP13596    | <i>Desi</i>      | Ca_Desig_denovo              | 1707                           | (A/G)       |
| 38002       | CadSNP13597    | <i>Desi</i>      | Ca_Desig_denovo              | 1719                           | (G/A)       |
| 38003       | CadSNP13598    | <i>Desi</i>      | Ca_Desig_denovo              | 1721                           | (C/G)       |
| 38004       | CadSNP13599    | <i>Desi</i>      | Ca_Desig_denovo              | 1723                           | (C/G)       |
| 38005       | CadSNP13600    | <i>Desi</i>      | Ca_Desig_denovo              | 1724                           | (A/G)       |
| 38006       | CadSNP13601    | <i>Desi</i>      | Ca_Desig_denovo              | 1737                           | (A/C)       |
| 38007       | CadSNP13602    | <i>Desi</i>      | Ca_Desig_denovo              | 1751                           | (A/G)       |
| 38008       | CadSNP13603    | <i>Desi</i>      | Ca_Desig_denovo              | 1754                           | (A/G)       |
| 38009       | CadSNP13604    | <i>Desi</i>      | Ca_Desig_denovo              | 3019                           | (A/T)       |
| 38010       | CadSNP13605    | <i>Desi</i>      | Ca_Desig_denovo              | 5897                           | (T/G)       |
| 38011       | CadSNP13606    | <i>Desi</i>      | Ca_Desig_denovo              | 5904                           | (T/G)       |
| 38012       | CadSNP13607    | <i>Desi</i>      | Ca_Desig_denovo              | 12291                          | (T/C)       |
| 38013       | CadSNP13608    | <i>Desi</i>      | Ca_Desig_denovo              | 13451                          | (T/G)       |
| 38014       | CadSNP13609    | <i>Desi</i>      | Ca_Desig_denovo              | 15902                          | (C/A)       |
| 38015       | CadSNP13610    | <i>Desi</i>      | Ca_Desig_denovo              | 15904                          | (G/A)       |
| 38016       | CadSNP13611    | <i>Desi</i>      | Ca_Desig_denovo              | 21276                          | (C/G)       |
| 38017       | CadSNP13612    | <i>Desi</i>      | Ca_Desig_denovo              | 22489                          | (T/C)       |
| 38018       | CadSNP13613    | <i>Desi</i>      | Ca_Desig_denovo              | 27061                          | (A/C)       |
| 38019       | CadSNP13614    | <i>Desi</i>      | Ca_Desig_denovo              | 27900                          | (A/C)       |
| 38020       | CadSNP13615    | <i>Desi</i>      | Ca_Desig_denovo              | 32583                          | (A/C)       |
| 38021       | CadSNP13616    | <i>Desi</i>      | Ca_Desig_denovo              | 34314                          | (A/C)       |
| 38022       | CadSNP13617    | <i>Desi</i>      | Ca_Desig_denovo              | 34317                          | (T/A)       |
| 38023       | CadSNP13618    | <i>Desi</i>      | Ca_Desig_denovo              | 34612                          | (A/G)       |
| 38024       | CadSNP13619    | <i>Desi</i>      | Ca_Desig_denovo              | 34658                          | (A/G)       |
| 38025       | CadSNP13620    | <i>Desi</i>      | Ca_Desig_denovo              | 35261                          | (A/G)       |
| 38026       | CadSNP13621    | <i>Desi</i>      | Ca_Desig_denovo              | 38443                          | (C/T)       |
| 38027       | CadSNP13622    | <i>Desi</i>      | Ca_Desig_denovo              | 38951                          | (T/C)       |
| 38028       | CadSNP13623    | <i>Desi</i>      | Ca_Desig_denovo              | 46461                          | (G/T)       |
| 38029       | CadSNP13624    | <i>Desi</i>      | Ca_Desig_denovo              | 49382                          | (T/C)       |
| 38030       | CadSNP13625    | <i>Desi</i>      | Ca_Desig_denovo              | 51651                          | (T/G)       |
| 38031       | CadSNP13626    | <i>Desi</i>      | Ca_Desig_denovo              | 52494                          | (T/C)       |
| 38032       | CadSNP13627    | <i>Desi</i>      | Ca_Desig_denovo              | 52575                          | (T/C)       |
| 38033       | CadSNP13628    | <i>Desi</i>      | Ca_Desig_denovo              | 54507                          | (G/A)       |
| 38034       | CadSNP13629    | <i>Desi</i>      | Ca_Desig_denovo              | 54557                          | (A/G)       |
| 38035       | CadSNP13630    | <i>Desi</i>      | Ca_Desig_denovo              | 61307                          | (T/C)       |
| 38036       | CadSNP13631    | <i>Desi</i>      | Ca_Desig_denovo              | 64076                          | (A/C)       |
| 38037       | CadSNP13632    | <i>Desi</i>      | Ca_Desig_denovo              | 65650                          | (T/C)       |

| <b>S.N.</b> | <b>SNP IDs</b> | <b>Cultivars</b> | <b>Chromosomes/scaffolds</b> | <b>Physical positions (bp)</b> | <b>SNPs</b> |
|-------------|----------------|------------------|------------------------------|--------------------------------|-------------|
| 38038       | CadSNP13633    | <i>Desi</i>      | Ca_Desig_denovo              | 70232                          | (G/A)       |
| 38039       | CadSNP13634    | <i>Desi</i>      | Ca_Desig_denovo              | 72807                          | (A/C)       |
| 38040       | CadSNP13635    | <i>Desi</i>      | Ca_Desig_denovo              | 73708                          | (C/A)       |
| 38041       | CadSNP13636    | <i>Desi</i>      | Ca_Desig_denovo              | 76491                          | (G/T)       |
| 38042       | CadSNP13637    | <i>Desi</i>      | Ca_Desig_denovo              | 77283                          | (A/C)       |
| 38043       | CadSNP13638    | <i>Desi</i>      | Ca_Desig_denovo              | 77284                          | (G/A)       |
| 38044       | CadSNP13639    | <i>Desi</i>      | Ca_Desig_denovo              | 79642                          | (G/A)       |
| 38045       | CadSNP13640    | <i>Desi</i>      | Ca_Desig_denovo              | 83265                          | (T/C)       |
| 38046       | CadSNP13641    | <i>Desi</i>      | Ca_Desig_denovo              | 83979                          | (C/A)       |
| 38047       | CadSNP13642    | <i>Desi</i>      | Ca_Desig_denovo              | 83980                          | (A/G)       |
| 38048       | CadSNP13643    | <i>Desi</i>      | Ca_Desig_denovo              | 84480                          | (C/T)       |
| 38049       | CadSNP13644    | <i>Desi</i>      | Ca_Desig_denovo              | 86210                          | (A/C)       |
| 38050       | CadSNP13645    | <i>Desi</i>      | Ca_Desig_denovo              | 89140                          | (G/A)       |
| 38051       | CadSNP13646    | <i>Desi</i>      | Ca_Desig_denovo              | 89939                          | (G/C)       |
| 38052       | CadSNP13647    | <i>Desi</i>      | Ca_Desig_denovo              | 92292                          | (G/A)       |
| 38053       | CadSNP13648    | <i>Desi</i>      | Ca_Desig_denovo              | 93471                          | (C/G)       |
| 38054       | CadSNP13649    | <i>Desi</i>      | Ca_Desig_denovo              | 95939                          | (T/G)       |
| 38055       | CadSNP13650    | <i>Desi</i>      | Ca_Desig_denovo              | 98343                          | (G/T)       |
| 38056       | CadSNP13651    | <i>Desi</i>      | Ca_Desig_denovo              | 98430                          | (C/T)       |
| 38057       | CadSNP13652    | <i>Desi</i>      | Ca_Desig_denovo              | 98485                          | (T/G)       |
| 38058       | CadSNP13653    | <i>Desi</i>      | Ca_Desig_denovo              | 98515                          | (A/G)       |
| 38059       | CadSNP13654    | <i>Desi</i>      | Ca_Desig_denovo              | 98616                          | (C/T)       |
| 38060       | CadSNP13655    | <i>Desi</i>      | Ca_Desig_denovo              | 98709                          | (C/T)       |
| 38061       | CadSNP13656    | <i>Desi</i>      | Ca_Desig_denovo              | 98787                          | (T/C)       |
| 38062       | CadSNP13657    | <i>Desi</i>      | Ca_Desig_denovo              | 98802                          | (C/T)       |
| 38063       | CadSNP13658    | <i>Desi</i>      | Ca_Desig_denovo              | 98962                          | (A/G)       |
| 38064       | CadSNP13659    | <i>Desi</i>      | Ca_Desig_denovo              | 98971                          | (G/A)       |
| 38065       | CadSNP13660    | <i>Desi</i>      | Ca_Desig_denovo              | 99009                          | (A/C)       |
| 38066       | CadSNP13661    | <i>Desi</i>      | Ca_Desig_denovo              | 99081                          | (C/T)       |
| 38067       | CadSNP13662    | <i>Desi</i>      | Ca_Desig_denovo              | 99167                          | (T/G)       |
| 38068       | CadSNP13663    | <i>Desi</i>      | Ca_Desig_denovo              | 99333                          | (A/G)       |
| 38069       | CadSNP13664    | <i>Desi</i>      | Ca_Desig_denovo              | 99342                          | (G/A)       |
| 38070       | CadSNP13665    | <i>Desi</i>      | Ca_Desig_denovo              | 99352                          | (A/G)       |
| 38071       | CadSNP13666    | <i>Desi</i>      | Ca_Desig_denovo              | 99360                          | (C/T)       |
| 38072       | CadSNP13667    | <i>Desi</i>      | Ca_Desig_denovo              | 99361                          | (A/C)       |
| 38073       | CadSNP13668    | <i>Desi</i>      | Ca_Desig_denovo              | 99403                          | (G/A)       |
| 38074       | CadSNP13669    | <i>Desi</i>      | Ca_Desig_denovo              | 99527                          | (C/A)       |
| 38075       | CadSNP13670    | <i>Desi</i>      | Ca_Desig_denovo              | 99546                          | (C/T)       |

| <b>S.N.</b> | <b>SNP IDs</b> | <b>Cultivars</b> | <b>Chromosomes/scaffolds</b> | <b>Physical positions (bp)</b> | <b>SNPs</b> |
|-------------|----------------|------------------|------------------------------|--------------------------------|-------------|
| 38076       | CadSNP13671    | <i>Desi</i>      | Ca_Desig_denovo              | 99565                          | (A/C)       |
| 38077       | CadSNP13672    | <i>Desi</i>      | Ca_Desig_denovo              | 99643                          | (T/G)       |
| 38078       | CadSNP13673    | <i>Desi</i>      | Ca_Desig_denovo              | 99707                          | (A/G)       |
| 38079       | CadSNP13674    | <i>Desi</i>      | Ca_Desig_denovo              | 99736                          | (T/G)       |
| 38080       | CadSNP13675    | <i>Desi</i>      | Ca_Desig_denovo              | 99743                          | (C/A)       |
| 38081       | CadSNP13676    | <i>Desi</i>      | Ca_Desig_denovo              | 99754                          | (A/C)       |
| 38082       | CadSNP13677    | <i>Desi</i>      | Ca_Desig_denovo              | 99825                          | (C/T)       |
| 38083       | CadSNP13678    | <i>Desi</i>      | Ca_Desig_denovo              | 101459                         | (T/G)       |
| 38084       | CadSNP13679    | <i>Desi</i>      | Ca_Desig_denovo              | 103071                         | (A/G)       |
| 38085       | CadSNP13680    | <i>Desi</i>      | Ca_Desig_denovo              | 103119                         | (T/C)       |
| 38086       | CadSNP13681    | <i>Desi</i>      | Ca_Desig_denovo              | 103132                         | (T/G)       |
| 38087       | CadSNP13682    | <i>Desi</i>      | Ca_Desig_denovo              | 105180                         | (T/C)       |
| 38088       | CadSNP13683    | <i>Desi</i>      | Ca_Desig_denovo              | 105181                         | (C/G)       |
| 38089       | CadSNP13684    | <i>Desi</i>      | Ca_Desig_denovo              | 105182                         | (A/T)       |
| 38090       | CadSNP13685    | <i>Desi</i>      | Ca_Desig_denovo              | 105184                         | (C/T)       |
| 38091       | CadSNP13686    | <i>Desi</i>      | Ca_Desig_denovo              | 106972                         | (T/C)       |
| 38092       | CadSNP13687    | <i>Desi</i>      | Ca_Desig_denovo              | 107022                         | (C/T)       |
| 38093       | CadSNP13688    | <i>Desi</i>      | Ca_Desig_denovo              | 108718                         | (A/C)       |
| 38094       | CadSNP13689    | <i>Desi</i>      | Ca_Desig_denovo              | 110777                         | (T/G)       |
| 38095       | CadSNP13690    | <i>Desi</i>      | Ca_Desig_denovo              | 110961                         | (C/G)       |
| 38096       | CadSNP13691    | <i>Desi</i>      | Ca_Desig_denovo              | 110979                         | (G/A)       |
| 38097       | CadSNP13692    | <i>Desi</i>      | Ca_Desig_denovo              | 111072                         | (G/A)       |
| 38098       | CadSNP13693    | <i>Desi</i>      | Ca_Desig_denovo              | 111089                         | (C/A)       |
| 38099       | CadSNP13694    | <i>Desi</i>      | Ca_Desig_denovo              | 111144                         | (C/G)       |
| 38100       | CadSNP13695    | <i>Desi</i>      | Ca_Desig_denovo              | 111165                         | (G/A)       |
| 38101       | CadSNP13696    | <i>Desi</i>      | Ca_Desig_denovo              | 111177                         | (T/G)       |
| 38102       | CadSNP13697    | <i>Desi</i>      | Ca_Desig_denovo              | 111181                         | (C/G)       |
| 38103       | CadSNP13698    | <i>Desi</i>      | Ca_Desig_denovo              | 111182                         | (C/G)       |
| 38104       | CadSNP13699    | <i>Desi</i>      | Ca_Desig_denovo              | 111251                         | (T/G)       |
| 38105       | CadSNP13700    | <i>Desi</i>      | Ca_Desig_denovo              | 111258                         | (G/A)       |
| 38106       | CadSNP13701    | <i>Desi</i>      | Ca_Desig_denovo              | 111276                         | (C/A)       |
| 38107       | CadSNP13702    | <i>Desi</i>      | Ca_Desig_denovo              | 111351                         | (G/A)       |
| 38108       | CadSNP13703    | <i>Desi</i>      | Ca_Desig_denovo              | 111444                         | (G/A)       |
| 38109       | CadSNP13704    | <i>Desi</i>      | Ca_Desig_denovo              | 111508                         | (C/G)       |
| 38110       | CadSNP13705    | <i>Desi</i>      | Ca_Desig_denovo              | 111523                         | (C/A)       |
| 38111       | CadSNP13706    | <i>Desi</i>      | Ca_Desig_denovo              | 111537                         | (G/A)       |
| 38112       | CadSNP13707    | <i>Desi</i>      | Ca_Desig_denovo              | 111581                         | (G/C)       |
| 38113       | CadSNP13708    | <i>Desi</i>      | Ca_Desig_denovo              | 111723                         | (G/A)       |

| <b>S.N.</b> | <b>SNP IDs</b> | <b>Cultivars</b> | <b>Chromosomes/scaffolds</b> | <b>Physical positions (bp)</b> | <b>SNPs</b> |
|-------------|----------------|------------------|------------------------------|--------------------------------|-------------|
| 38114       | CadSNP13709    | <i>Desi</i>      | Ca_Desig_denovo              | 111731                         | (T/G)       |
| 38115       | CadSNP13710    | <i>Desi</i>      | Ca_Desig_denovo              | 111909                         | (G/A)       |
| 38116       | CadSNP13711    | <i>Desi</i>      | Ca_Desig_denovo              | 111918                         | (A/G)       |
| 38117       | CadSNP13712    | <i>Desi</i>      | Ca_Desig_denovo              | 111946                         | (A/G)       |
| 38118       | CadSNP13713    | <i>Desi</i>      | Ca_Desig_denovo              | 111951                         | (A/G)       |
| 38119       | CadSNP13714    | <i>Desi</i>      | Ca_Desig_denovo              | 111989                         | (A/G)       |
| 38120       | CadSNP13715    | <i>Desi</i>      | Ca_Desig_denovo              | 112000                         | (T/G)       |
| 38121       | CadSNP13716    | <i>Desi</i>      | Ca_Desig_denovo              | 112002                         | (G/A)       |
| 38122       | CadSNP13717    | <i>Desi</i>      | Ca_Desig_denovo              | 112047                         | (A/G)       |
| 38123       | CadSNP13718    | <i>Desi</i>      | Ca_Desig_denovo              | 112176                         | (G/T)       |
| 38124       | CadSNP13719    | <i>Desi</i>      | Ca_Desig_denovo              | 112188                         | (G/A)       |
| 38125       | CadSNP13720    | <i>Desi</i>      | Ca_Desig_denovo              | 112197                         | (A/G)       |
| 38126       | CadSNP13721    | <i>Desi</i>      | Ca_Desig_denovo              | 112201                         | (C/G)       |
| 38127       | CadSNP13722    | <i>Desi</i>      | Ca_Desig_denovo              | 114119                         | (C/A)       |
| 38128       | CadSNP13723    | <i>Desi</i>      | Ca_Desig_denovo              | 114542                         | (T/C)       |
| 38129       | CadSNP13724    | <i>Desi</i>      | Ca_Desig_denovo              | 114577                         | (A/C)       |
| 38130       | CadSNP13725    | <i>Desi</i>      | Ca_Desig_denovo              | 115936                         | (G/T)       |
| 38131       | CadSNP13726    | <i>Desi</i>      | Ca_Desig_denovo              | 117510                         | (T/G)       |
| 38132       | CadSNP13727    | <i>Desi</i>      | Ca_Desig_denovo              | 118055                         | (A/G)       |
| 38133       | CadSNP13728    | <i>Desi</i>      | Ca_Desig_denovo              | 122166                         | (C/T)       |
| 38134       | CadSNP13729    | <i>Desi</i>      | Ca_Desig_denovo              | 122970                         | (C/T)       |
| 38135       | CadSNP13730    | <i>Desi</i>      | Ca_Desig_denovo              | 124567                         | (T/C)       |
| 38136       | CadSNP13731    | <i>Desi</i>      | Ca_Desig_denovo              | 124896                         | (A/T)       |
| 38137       | CadSNP13732    | <i>Desi</i>      | Ca_Desig_denovo              | 126618                         | (A/G)       |
| 38138       | CadSNP13733    | <i>Desi</i>      | Ca_Desig_denovo              | 129083                         | (A/C)       |
| 38139       | CadSNP13734    | <i>Desi</i>      | Ca_Desig_denovo              | 129826                         | (A/C)       |
| 38140       | CadSNP13735    | <i>Desi</i>      | Ca_Desig_denovo              | 137196                         | (A/T)       |
| 38141       | CadSNP13736    | <i>Desi</i>      | Ca_Desig_denovo              | 137197                         | (A/T)       |
| 38142       | CadSNP13737    | <i>Desi</i>      | Ca_Desig_denovo              | 137198                         | (C/T)       |
| 38143       | CadSNP13738    | <i>Desi</i>      | Ca_Desig_denovo              | 139778                         | (A/C)       |
| 38144       | CadSNP13739    | <i>Desi</i>      | Ca_Desig_denovo              | 143400                         | (T/G)       |
| 38145       | CadSNP13740    | <i>Desi</i>      | Ca_Desig_denovo              | 143406                         | (T/G)       |
| 38146       | CadSNP13741    | <i>Desi</i>      | Ca_Desig_denovo              | 144084                         | (T/C)       |
| 38147       | CadSNP13742    | <i>Desi</i>      | Ca_Desig_denovo              | 144089                         | (G/C)       |
| 38148       | CadSNP13743    | <i>Desi</i>      | Ca_Desig_denovo              | 144126                         | (T/C)       |
| 38149       | CadSNP13744    | <i>Desi</i>      | Ca_Desig_denovo              | 144705                         | (A/C)       |
| 38150       | CadSNP13745    | <i>Desi</i>      | Ca_Desig_denovo              | 146474                         | (A/C)       |
| 38151       | CadSNP13746    | <i>Desi</i>      | Ca_Desig_denovo              | 147586                         | (C/G)       |

| <b>S.N.</b> | <b>SNP IDs</b> | <b>Cultivars</b> | <b>Chromosomes/scaffolds</b> | <b>Physical positions (bp)</b> | <b>SNPs</b> |
|-------------|----------------|------------------|------------------------------|--------------------------------|-------------|
| 38152       | CadSNP13747    | <i>Desi</i>      | Ca_Desig_denovo              | 147588                         | (A/C)       |
| 38153       | CadSNP13748    | <i>Desi</i>      | Ca_Desig_denovo              | 151532                         | (G/T)       |
| 38154       | CadSNP13749    | <i>Desi</i>      | Ca_Desig_denovo              | 151549                         | (C/G)       |
| 38155       | CadSNP13750    | <i>Desi</i>      | Ca_Desig_denovo              | 153309                         | (T/C)       |
| 38156       | CadSNP13751    | <i>Desi</i>      | Ca_Desig_denovo              | 154770                         | (A/G)       |
| 38157       | CadSNP13752    | <i>Desi</i>      | Ca_Desig_denovo              | 154778                         | (G/A)       |
| 38158       | CadSNP13753    | <i>Desi</i>      | Ca_Desig_denovo              | 154822                         | (A/C)       |
| 38159       | CadSNP13754    | <i>Desi</i>      | Ca_Desig_denovo              | 154830                         | (C/T)       |
| 38160       | CadSNP13755    | <i>Desi</i>      | Ca_Desig_denovo              | 154863                         | (T/C)       |
| 38161       | CadSNP13756    | <i>Desi</i>      | Ca_Desig_denovo              | 155464                         | (A/G)       |
| 38162       | CadSNP13757    | <i>Desi</i>      | Ca_Desig_denovo              | 155497                         | (A/G)       |
| 38163       | CadSNP13758    | <i>Desi</i>      | Ca_Desig_denovo              | 156723                         | (C/G)       |
| 38164       | CadSNP13759    | <i>Desi</i>      | Ca_Desig_denovo              | 156892                         | (A/C)       |
| 38165       | CadSNP13760    | <i>Desi</i>      | Ca_Desig_denovo              | 159774                         | (A/C)       |
| 38166       | CadSNP13761    | <i>Desi</i>      | Ca_Desig_denovo              | 160842                         | (G/A)       |
| 38167       | CadSNP13762    | <i>Desi</i>      | Ca_Desig_denovo              | 161942                         | (T/C)       |
| 38168       | CadSNP13763    | <i>Desi</i>      | Ca_Desig_denovo              | 162100                         | (A/C)       |
| 38169       | CadSNP13764    | <i>Desi</i>      | Ca_Desig_denovo              | 168728                         | (T/G)       |
| 38170       | CadSNP13765    | <i>Desi</i>      | Ca_Desig_denovo              | 169861                         | (T/G)       |
| 38171       | CadSNP13766    | <i>Desi</i>      | Ca_Desig_denovo              | 171076                         | (G/T)       |
| 38172       | CadSNP13767    | <i>Desi</i>      | Ca_Desig_denovo              | 171078                         | (T/C)       |
| 38173       | CadSNP13768    | <i>Desi</i>      | Ca_Desig_denovo              | 171081                         | (A/C)       |
| 38174       | CadSNP13769    | <i>Desi</i>      | Ca_Desig_denovo              | 171105                         | (G/T)       |
| 38175       | CadSNP13770    | <i>Desi</i>      | Ca_Desig_denovo              | 177111                         | (T/G)       |
| 38176       | CadSNP13771    | <i>Desi</i>      | Ca_Desig_denovo              | 187705                         | (A/G)       |
| 38177       | CadSNP13772    | <i>Desi</i>      | Ca_Desig_denovo              | 188415                         | (T/C)       |
| 38178       | CadSNP13773    | <i>Desi</i>      | Ca_Desig_denovo              | 188790                         | (A/C)       |
| 38179       | CadSNP13774    | <i>Desi</i>      | Ca_Desig_denovo              | 189381                         | (C/T)       |
| 38180       | CadSNP13775    | <i>Desi</i>      | Ca_Desig_denovo              | 189417                         | (T/C)       |
| 38181       | CadSNP13776    | <i>Desi</i>      | Ca_Desig_denovo              | 189424                         | (G/C)       |
| 38182       | CadSNP13777    | <i>Desi</i>      | Ca_Desig_denovo              | 189789                         | (C/T)       |
| 38183       | CadSNP13778    | <i>Desi</i>      | Ca_Desig_denovo              | 191208                         | (T/C)       |
| 38184       | CadSNP13779    | <i>Desi</i>      | Ca_Desig_denovo              | 191209                         | (C/T)       |
| 38185       | CadSNP13780    | <i>Desi</i>      | Ca_Desig_denovo              | 193981                         | (T/G)       |
| 38186       | CadSNP13781    | <i>Desi</i>      | Ca_Desig_denovo              | 196238                         | (T/G)       |
| 38187       | CadSNP13782    | <i>Desi</i>      | Ca_Desig_denovo              | 200899                         | (G/T)       |
| 38188       | CadSNP13783    | <i>Desi</i>      | Ca_Desig_denovo              | 202832                         | (A/C)       |
| 38189       | CadSNP13784    | <i>Desi</i>      | Ca_Desig_denovo              | 202833                         | (G/T)       |

| <b>S.N.</b> | <b>SNP IDs</b> | <b>Cultivars</b> | <b>Chromosomes/scaffolds</b> | <b>Physical positions (bp)</b> | <b>SNPs</b> |
|-------------|----------------|------------------|------------------------------|--------------------------------|-------------|
| 38190       | CadSNP13785    | <i>Desi</i>      | Ca_Desig_denovo              | 210659                         | (A/G)       |
| 38191       | CadSNP13786    | <i>Desi</i>      | Ca_Desig_denovo              | 210695                         | (G/A)       |
| 38192       | CadSNP13787    | <i>Desi</i>      | Ca_Desig_denovo              | 218206                         | (C/T)       |
| 38193       | CadSNP13788    | <i>Desi</i>      | Ca_Desig_denovo              | 218213                         | (G/T)       |
| 38194       | CadSNP13789    | <i>Desi</i>      | Ca_Desig_denovo              | 219015                         | (A/C)       |
| 38195       | CadSNP13790    | <i>Desi</i>      | Ca_Desig_denovo              | 219016                         | (G/A)       |
| 38196       | CadSNP13791    | <i>Desi</i>      | Ca_Desig_denovo              | 219093                         | (A/G)       |
| 38197       | CadSNP13792    | <i>Desi</i>      | Ca_Desig_denovo              | 219095                         | (T/G)       |
| 38198       | CadSNP13793    | <i>Desi</i>      | Ca_Desig_denovo              | 219409                         | (G/T)       |
| 38199       | CadSNP13794    | <i>Desi</i>      | Ca_Desig_denovo              | 219427                         | (G/A)       |
| 38200       | CadSNP13795    | <i>Desi</i>      | Ca_Desig_denovo              | 220306                         | (G/C)       |
| 38201       | CadSNP13796    | <i>Desi</i>      | Ca_Desig_denovo              | 220785                         | (T/A)       |
| 38202       | CadSNP13797    | <i>Desi</i>      | Ca_Desig_denovo              | 220791                         | (A/T)       |
| 38203       | CadSNP13798    | <i>Desi</i>      | Ca_Desig_denovo              | 220829                         | (T/A)       |
| 38204       | CadSNP13799    | <i>Desi</i>      | Ca_Desig_denovo              | 220841                         | (A/G)       |
| 38205       | CadSNP13800    | <i>Desi</i>      | Ca_Desig_denovo              | 222101                         | (T/C)       |
| 38206       | CadSNP13801    | <i>Desi</i>      | Ca_Desig_denovo              | 228346                         | (C/T)       |
| 38207       | CadSNP13802    | <i>Desi</i>      | Ca_Desig_denovo              | 228397                         | (C/T)       |
| 38208       | CadSNP13803    | <i>Desi</i>      | Ca_Desig_denovo              | 230825                         | (A/C)       |
| 38209       | CadSNP13804    | <i>Desi</i>      | Ca_Desig_denovo              | 230826                         | (G/A)       |
| 38210       | CadSNP13805    | <i>Desi</i>      | Ca_Desig_denovo              | 230827                         | (A/C)       |
| 38211       | CadSNP13806    | <i>Desi</i>      | Ca_Desig_denovo              | 237051                         | (A/T)       |
| 38212       | CadSNP13807    | <i>Desi</i>      | Ca_Desig_denovo              | 242194                         | (T/C)       |
| 38213       | CadSNP13808    | <i>Desi</i>      | Ca_Desig_denovo              | 243693                         | (T/G)       |
| 38214       | CadSNP13809    | <i>Desi</i>      | Ca_Desig_denovo              | 245231                         | (C/T)       |
| 38215       | CadSNP13810    | <i>Desi</i>      | Ca_Desig_denovo              | 247091                         | (T/G)       |
| 38216       | CadSNP13811    | <i>Desi</i>      | Ca_Desig_denovo              | 250349                         | (T/G)       |
| 38217       | CadSNP13812    | <i>Desi</i>      | Ca_Desig_denovo              | 251028                         | (A/G)       |
| 38218       | CadSNP13813    | <i>Desi</i>      | Ca_Desig_denovo              | 251065                         | (C/G)       |
| 38219       | CadSNP13814    | <i>Desi</i>      | Ca_Desig_denovo              | 251070                         | (A/G)       |
| 38220       | CadSNP13815    | <i>Desi</i>      | Ca_Desig_denovo              | 251191                         | (A/C)       |
| 38221       | CadSNP13816    | <i>Desi</i>      | Ca_Desig_denovo              | 251192                         | (G/A)       |
| 38222       | CadSNP13817    | <i>Desi</i>      | Ca_Desig_denovo              | 253370                         | (T/C)       |
| 38223       | CadSNP13818    | <i>Desi</i>      | Ca_Desig_denovo              | 253419                         | (A/G)       |
| 38224       | CadSNP13819    | <i>Desi</i>      | Ca_Desig_denovo              | 256378                         | (G/T)       |
| 38225       | CadSNP13820    | <i>Desi</i>      | Ca_Desig_denovo              | 256391                         | (G/A)       |
| 38226       | CadSNP13821    | <i>Desi</i>      | Ca_Desig_denovo              | 260830                         | (A/G)       |
| 38227       | CadSNP13822    | <i>Desi</i>      | Ca_Desig_denovo              | 265735                         | (A/G)       |



| <b>S.N.</b> | <b>SNP IDs</b> | <b>Cultivars</b> | <b>Chromosomes/scaffolds</b> | <b>Physical positions (bp)</b> | <b>SNPs</b> |
|-------------|----------------|------------------|------------------------------|--------------------------------|-------------|
| 38228       | CadSNP13823    | <i>Desi</i>      | Ca_Desig_denovo              | 265795                         | (T/G)       |
| 38229       | CadSNP13824    | <i>Desi</i>      | Ca_Desig_denovo              | 269979                         | (A/C)       |
| 38230       | CadSNP13825    | <i>Desi</i>      | Ca_Desig_denovo              | 270068                         | (A/G)       |
| 38231       | CadSNP13826    | <i>Desi</i>      | Ca_Desig_denovo              | 270198                         | (A/G)       |
| 38232       | CadSNP13827    | <i>Desi</i>      | Ca_Desig_denovo              | 270204                         | (T/G)       |
| 38233       | CadSNP13828    | <i>Desi</i>      | Ca_Desig_denovo              | 271258                         | (T/G)       |
| 38234       | CadSNP13829    | <i>Desi</i>      | Ca_Desig_denovo              | 275015                         | (G/A)       |
| 38235       | CadSNP13830    | <i>Desi</i>      | Ca_Desig_denovo              | 275066                         | (G/A)       |
| 38236       | CadSNP13831    | <i>Desi</i>      | Ca_Desig_denovo              | 279333                         | (T/G)       |
| 38237       | CadSNP13832    | <i>Desi</i>      | Ca_Desig_denovo              | 286914                         | (T/C)       |
| 38238       | CadSNP13833    | <i>Desi</i>      | Ca_Desig_denovo              | 287171                         | (T/G)       |
| 38239       | CadSNP13834    | <i>Desi</i>      | Ca_Desig_denovo              | 288252                         | (T/G)       |
| 38240       | CadSNP13835    | <i>Desi</i>      | Ca_Desig_denovo              | 290308                         | (A/G)       |
| 38241       | CadSNP13836    | <i>Desi</i>      | Ca_Desig_denovo              | 291026                         | (T/G)       |
| 38242       | CadSNP13837    | <i>Desi</i>      | Ca_Desig_denovo              | 302582                         | (C/A)       |
| 38243       | CadSNP13838    | <i>Desi</i>      | Ca_Desig_denovo              | 303784                         | (T/G)       |
| 38244       | CadSNP13839    | <i>Desi</i>      | Ca_Desig_denovo              | 305202                         | (T/G)       |
| 38245       | CadSNP13840    | <i>Desi</i>      | Ca_Desig_denovo              | 306107                         | (T/G)       |
| 38246       | CadSNP13841    | <i>Desi</i>      | Ca_Desig_denovo              | 327012                         | (T/G)       |
| 38247       | CadSNP13842    | <i>Desi</i>      | Ca_Desig_denovo              | 327113                         | (A/G)       |
| 38248       | CadSNP13843    | <i>Desi</i>      | Ca_Desig_denovo              | 329219                         | (C/G)       |
| 38249       | CadSNP13844    | <i>Desi</i>      | Ca_Desig_denovo              | 329220                         | (A/C)       |
| 38250       | CadSNP13845    | <i>Desi</i>      | Ca_Desig_denovo              | 329221                         | (G/C)       |
| 38251       | CadSNP13846    | <i>Desi</i>      | Ca_Desig_denovo              | 334672                         | (T/G)       |
| 38252       | CadSNP13847    | <i>Desi</i>      | Ca_Desig_denovo              | 334684                         | (T/G)       |
| 38253       | CadSNP13848    | <i>Desi</i>      | Ca_Desig_denovo              | 335780                         | (T/G)       |
| 38254       | CadSNP13849    | <i>Desi</i>      | Ca_Desig_denovo              | 335789                         | (A/T)       |
| 38255       | CadSNP13850    | <i>Desi</i>      | Ca_Desig_denovo              | 336568                         | (A/G)       |
| 38256       | CadSNP13851    | <i>Desi</i>      | Ca_Desig_denovo              | 339633                         | (A/G)       |
| 38257       | CadSNP13852    | <i>Desi</i>      | Ca_Desig_denovo              | 340153                         | (T/G)       |
| 38258       | CadSNP13853    | <i>Desi</i>      | Ca_Desig_denovo              | 341523                         | (C/T)       |
| 38259       | CadSNP13854    | <i>Desi</i>      | Ca_Desig_denovo              | 341569                         | (C/T)       |
| 38260       | CadSNP13855    | <i>Desi</i>      | Ca_Desig_denovo              | 345855                         | (T/C)       |
| 38261       | CadSNP13856    | <i>Desi</i>      | Ca_Desig_denovo              | 348069                         | (A/G)       |
| 38262       | CadSNP13857    | <i>Desi</i>      | Ca_Desig_denovo              | 349546                         | (T/G)       |
| 38263       | CadSNP13858    | <i>Desi</i>      | Ca_Desig_denovo              | 349828                         | (C/T)       |
| 38264       | CadSNP13859    | <i>Desi</i>      | Ca_Desig_denovo              | 350884                         | (C/G)       |
| 38265       | CadSNP13860    | <i>Desi</i>      | Ca_Desig_denovo              | 350886                         | (A/C)       |

| <b>S.N.</b> | <b>SNP IDs</b> | <b>Cultivars</b> | <b>Chromosomes/scaffolds</b> | <b>Physical positions (bp)</b> | <b>SNPs</b> |
|-------------|----------------|------------------|------------------------------|--------------------------------|-------------|
| 38266       | CadSNP13861    | <i>Desi</i>      | Ca_Desig_denovo              | 350889                         | (T/C)       |
| 38267       | CadSNP13862    | <i>Desi</i>      | Ca_Desig_denovo              | 350890                         | (G/T)       |
| 38268       | CadSNP13863    | <i>Desi</i>      | Ca_Desig_denovo              | 351779                         | (T/G)       |
| 38269       | CadSNP13864    | <i>Desi</i>      | Ca_Desig_denovo              | 352322                         | (T/A)       |
| 38270       | CadSNP13865    | <i>Desi</i>      | Ca_Desig_denovo              | 354236                         | (A/C)       |
| 38271       | CadSNP13866    | <i>Desi</i>      | Ca_Desig_denovo              | 357280                         | (A/T)       |
| 38272       | CadSNP13867    | <i>Desi</i>      | Ca_Desig_denovo              | 363000                         | (A/C)       |
| 38273       | CadSNP13868    | <i>Desi</i>      | Ca_Desig_denovo              | 363010                         | (G/T)       |
| 38274       | CadSNP13869    | <i>Desi</i>      | Ca_Desig_denovo              | 363490                         | (C/T)       |
| 38275       | CadSNP13870    | <i>Desi</i>      | Ca_Desig_denovo              | 363631                         | (A/C)       |
| 38276       | CadSNP13871    | <i>Desi</i>      | Ca_Desig_denovo              | 368038                         | (G/A)       |
| 38277       | CadSNP13872    | <i>Desi</i>      | Ca_Desig_denovo              | 369612                         | (T/G)       |
| 38278       | CadSNP13873    | <i>Desi</i>      | Ca_Desig_denovo              | 373243                         | (C/G)       |
| 38279       | CadSNP13874    | <i>Desi</i>      | Ca_Desig_denovo              | 373303                         | (A/C)       |
| 38280       | CadSNP13875    | <i>Desi</i>      | Ca_Desig_denovo              | 373388                         | (A/G)       |
| 38281       | CadSNP13876    | <i>Desi</i>      | Ca_Desig_denovo              | 373390                         | (G/A)       |
| 38282       | CadSNP13877    | <i>Desi</i>      | Ca_Desig_denovo              | 373391                         | (A/G)       |
| 38283       | CadSNP13878    | <i>Desi</i>      | Ca_Desig_denovo              | 373392                         | (G/A)       |
| 38284       | CadSNP13879    | <i>Desi</i>      | Ca_Desig_denovo              | 374130                         | (T/G)       |
| 38285       | CadSNP13880    | <i>Desi</i>      | Ca_Desig_denovo              | 375206                         | (G/T)       |
| 38286       | CadSNP13881    | <i>Desi</i>      | Ca_Desig_denovo              | 380542                         | (A/G)       |
| 38287       | CadSNP13882    | <i>Desi</i>      | Ca_Desig_denovo              | 380564                         | (C/A)       |
| 38288       | CadSNP13883    | <i>Desi</i>      | Ca_Desig_denovo              | 388526                         | (A/G)       |
| 38289       | CadSNP13884    | <i>Desi</i>      | Ca_Desig_denovo              | 388530                         | (G/C)       |
| 38290       | CadSNP13885    | <i>Desi</i>      | Ca_Desig_denovo              | 390363                         | (T/G)       |
| 38291       | CadSNP13886    | <i>Desi</i>      | Ca_Desig_denovo              | 393670                         | (C/A)       |
| 38292       | CadSNP13887    | <i>Desi</i>      | Ca_Desig_denovo              | 394879                         | (A/C)       |
| 38293       | CadSNP13888    | <i>Desi</i>      | Ca_Desig_denovo              | 403900                         | (G/T)       |
| 38294       | CadSNP13889    | <i>Desi</i>      | Ca_Desig_denovo              | 404874                         | (T/G)       |
| 38295       | CadSNP13890    | <i>Desi</i>      | Ca_Desig_denovo              | 404883                         | (A/G)       |
| 38296       | CadSNP13891    | <i>Desi</i>      | Ca_Desig_denovo              | 404921                         | (T/G)       |
| 38297       | CadSNP13892    | <i>Desi</i>      | Ca_Desig_denovo              | 410963                         | (A/C)       |
| 38298       | CadSNP13893    | <i>Desi</i>      | Ca_Desig_denovo              | 410965                         | (A/C)       |
| 38299       | CadSNP13894    | <i>Desi</i>      | Ca_Desig_denovo              | 417757                         | (A/C)       |
| 38300       | CadSNP13895    | <i>Desi</i>      | Ca_Desig_denovo              | 418427                         | (C/T)       |
| 38301       | CadSNP13896    | <i>Desi</i>      | Ca_Desig_denovo              | 420322                         | (A/T)       |
| 38302       | CadSNP13897    | <i>Desi</i>      | Ca_Desig_denovo              | 420331                         | (A/C)       |
| 38303       | CadSNP13898    | <i>Desi</i>      | Ca_Desig_denovo              | 420645                         | (T/G)       |

| <b>S.N.</b> | <b>SNP IDs</b> | <b>Cultivars</b> | <b>Chromosomes/scaffolds</b> | <b>Physical positions (bp)</b> | <b>SNPs</b> |
|-------------|----------------|------------------|------------------------------|--------------------------------|-------------|
| 38304       | CadSNP13899    | <i>Desi</i>      | Ca_Desig_denovo              | 420651                         | (C/G)       |
| 38305       | CadSNP13900    | <i>Desi</i>      | Ca_Desig_denovo              | 420670                         | (A/G)       |
| 38306       | CadSNP13901    | <i>Desi</i>      | Ca_Desig_denovo              | 420671                         | (C/G)       |
| 38307       | CadSNP13902    | <i>Desi</i>      | Ca_Desig_denovo              | 420682                         | (T/G)       |
| 38308       | CadSNP13903    | <i>Desi</i>      | Ca_Desig_denovo              | 420704                         | (T/G)       |
| 38309       | CadSNP13904    | <i>Desi</i>      | Ca_Desig_denovo              | 420716                         | (T/G)       |
| 38310       | CadSNP13905    | <i>Desi</i>      | Ca_Desig_denovo              | 422625                         | (A/T)       |
| 38311       | CadSNP13906    | <i>Desi</i>      | Ca_Desig_denovo              | 422948                         | (G/C)       |
| 38312       | CadSNP13907    | <i>Desi</i>      | Ca_Desig_denovo              | 425917                         | (A/G)       |
| 38313       | CadSNP13908    | <i>Desi</i>      | Ca_Desig_denovo              | 426590                         | (A/G)       |
| 38314       | CadSNP13909    | <i>Desi</i>      | Ca_Desig_denovo              | 426958                         | (T/G)       |
| 38315       | CadSNP13910    | <i>Desi</i>      | Ca_Desig_denovo              | 433235                         | (T/G)       |
| 38316       | CadSNP13911    | <i>Desi</i>      | Ca_Desig_denovo              | 435105                         | (A/T)       |
| 38317       | CadSNP13912    | <i>Desi</i>      | Ca_Desig_denovo              | 436325                         | (G/A)       |
| 38318       | CadSNP13913    | <i>Desi</i>      | Ca_Desig_denovo              | 438044                         | (A/G)       |
| 38319       | CadSNP13914    | <i>Desi</i>      | Ca_Desig_denovo              | 438131                         | (A/G)       |
| 38320       | CadSNP13915    | <i>Desi</i>      | Ca_Desig_denovo              | 439723                         | (T/C)       |
| 38321       | CadSNP13916    | <i>Desi</i>      | Ca_Desig_denovo              | 439724                         | (A/C)       |
| 38322       | CadSNP13917    | <i>Desi</i>      | Ca_Desig_denovo              | 440446                         | (G/A)       |
| 38323       | CadSNP13918    | <i>Desi</i>      | Ca_Desig_denovo              | 442123                         | (T/G)       |
| 38324       | CadSNP13919    | <i>Desi</i>      | Ca_Desig_denovo              | 444022                         | (T/C)       |
| 38325       | CadSNP13920    | <i>Desi</i>      | Ca_Desig_denovo              | 444627                         | (G/C)       |
| 38326       | CadSNP13921    | <i>Desi</i>      | Ca_Desig_denovo              | 444628                         | (T/A)       |
| 38327       | CadSNP13922    | <i>Desi</i>      | Ca_Desig_denovo              | 444634                         | (G/T)       |
| 38328       | CadSNP13923    | <i>Desi</i>      | Ca_Desig_denovo              | 446594                         | (G/A)       |
| 38329       | CadSNP13924    | <i>Desi</i>      | Ca_Desig_denovo              | 446643                         | (G/A)       |
| 38330       | CadSNP13925    | <i>Desi</i>      | Ca_Desig_denovo              | 447143                         | (A/C)       |
| 38331       | CadSNP13926    | <i>Desi</i>      | Ca_Desig_denovo              | 449373                         | (G/C)       |
| 38332       | CadSNP13927    | <i>Desi</i>      | Ca_Desig_denovo              | 449374                         | (T/A)       |
| 38333       | CadSNP13928    | <i>Desi</i>      | Ca_Desig_denovo              | 452028                         | (A/G)       |
| 38334       | CadSNP13929    | <i>Desi</i>      | Ca_Desig_denovo              | 452034                         | (G/T)       |
| 38335       | CadSNP13930    | <i>Desi</i>      | Ca_Desig_denovo              | 452815                         | (A/C)       |
| 38336       | CadSNP13931    | <i>Desi</i>      | Ca_Desig_denovo              | 453631                         | (A/G)       |
| 38337       | CadSNP13932    | <i>Desi</i>      | Ca_Desig_denovo              | 454800                         | (T/G)       |
| 38338       | CadSNP13933    | <i>Desi</i>      | Ca_Desig_denovo              | 456026                         | (G/T)       |
| 38339       | CadSNP13934    | <i>Desi</i>      | Ca_Desig_denovo              | 456037                         | (T/G)       |
| 38340       | CadSNP13935    | <i>Desi</i>      | Ca_Desig_denovo              | 456184                         | (T/G)       |
| 38341       | CadSNP13936    | <i>Desi</i>      | Ca_Desig_denovo              | 456589                         | (G/T)       |

| <b>S.N.</b> | <b>SNP IDs</b> | <b>Cultivars</b> | <b>Chromosomes/scaffolds</b> | <b>Physical positions (bp)</b> | <b>SNPs</b> |
|-------------|----------------|------------------|------------------------------|--------------------------------|-------------|
| 38342       | CadSNP13937    | <i>Desi</i>      | Ca_Desig_denovo              | 456630                         | (G/T)       |
| 38343       | CadSNP13938    | <i>Desi</i>      | Ca_Desig_denovo              | 460576                         | (A/T)       |
| 38344       | CadSNP13939    | <i>Desi</i>      | Ca_Desig_denovo              | 467113                         | (T/G)       |
| 38345       | CadSNP13940    | <i>Desi</i>      | Ca_Desig_denovo              | 473514                         | (T/A)       |
| 38346       | CadSNP13941    | <i>Desi</i>      | Ca_Desig_denovo              | 474158                         | (T/C)       |
| 38347       | CadSNP13942    | <i>Desi</i>      | Ca_Desig_denovo              | 474798                         | (T/C)       |
| 38348       | CadSNP13943    | <i>Desi</i>      | Ca_Desig_denovo              | 475044                         | (A/C)       |
| 38349       | CadSNP13944    | <i>Desi</i>      | Ca_Desig_denovo              | 477533                         | (C/T)       |
| 38350       | CadSNP13945    | <i>Desi</i>      | Ca_Desig_denovo              | 478221                         | (T/G)       |
| 38351       | CadSNP13946    | <i>Desi</i>      | Ca_Desig_denovo              | 481090                         | (A/G)       |
| 38352       | CadSNP13947    | <i>Desi</i>      | Ca_Desig_denovo              | 482154                         | (G/T)       |
| 38353       | CadSNP13948    | <i>Desi</i>      | Ca_Desig_denovo              | 482156                         | (T/G)       |
| 38354       | CadSNP13949    | <i>Desi</i>      | Ca_Desig_denovo              | 482158                         | (T/G)       |
| 38355       | CadSNP13950    | <i>Desi</i>      | Ca_Desig_denovo              | 482161                         | (A/G)       |
| 38356       | CadSNP13951    | <i>Desi</i>      | Ca_Desig_denovo              | 482196                         | (A/G)       |
| 38357       | CadSNP13952    | <i>Desi</i>      | Ca_Desig_denovo              | 483440                         | (C/G)       |
| 38358       | CadSNP13953    | <i>Desi</i>      | Ca_Desig_denovo              | 484190                         | (A/G)       |
| 38359       | CadSNP13954    | <i>Desi</i>      | Ca_Desig_denovo              | 486276                         | (T/G)       |
| 38360       | CadSNP13955    | <i>Desi</i>      | Ca_Desig_denovo              | 489016                         | (G/T)       |
| 38361       | CadSNP13956    | <i>Desi</i>      | Ca_Desig_denovo              | 489736                         | (A/C)       |
| 38362       | CadSNP13957    | <i>Desi</i>      | Ca_Desig_denovo              | 490853                         | (A/C)       |
| 38363       | CadSNP13958    | <i>Desi</i>      | Ca_Desig_denovo              | 490854                         | (G/C)       |
| 38364       | CadSNP13959    | <i>Desi</i>      | Ca_Desig_denovo              | 494416                         | (T/G)       |
| 38365       | CadSNP13960    | <i>Desi</i>      | Ca_Desig_denovo              | 499793                         | (T/C)       |
| 38366       | CadSNP13961    | <i>Desi</i>      | Ca_Desig_denovo              | 499842                         | (A/G)       |
| 38367       | CadSNP13962    | <i>Desi</i>      | Ca_Desig_denovo              | 500991                         | (A/T)       |
| 38368       | CadSNP13963    | <i>Desi</i>      | Ca_Desig_denovo              | 503553                         | (T/G)       |
| 38369       | CadSNP13964    | <i>Desi</i>      | Ca_Desig_denovo              | 503639                         | (A/G)       |
| 38370       | CadSNP13965    | <i>Desi</i>      | Ca_Desig_denovo              | 504320                         | (T/G)       |
| 38371       | CadSNP13966    | <i>Desi</i>      | Ca_Desig_denovo              | 505303                         | (G/A)       |
| 38372       | CadSNP13967    | <i>Desi</i>      | Ca_Desig_denovo              | 505304                         | (T/G)       |
| 38373       | CadSNP13968    | <i>Desi</i>      | Ca_Desig_denovo              | 506888                         | (T/G)       |
| 38374       | CadSNP13969    | <i>Desi</i>      | Ca_Desig_denovo              | 511888                         | (A/G)       |
| 38375       | CadSNP13970    | <i>Desi</i>      | Ca_Desig_denovo              | 518139                         | (T/G)       |
| 38376       | CadSNP13971    | <i>Desi</i>      | Ca_Desig_denovo              | 518892                         | (T/G)       |
| 38377       | CadSNP13972    | <i>Desi</i>      | Ca_Desig_denovo              | 520428                         | (A/C)       |
| 38378       | CadSNP13973    | <i>Desi</i>      | Ca_Desig_denovo              | 520429                         | (G/T)       |
| 38379       | CadSNP13974    | <i>Desi</i>      | Ca_Desig_denovo              | 520652                         | (A/G)       |

| <b>S.N.</b> | <b>SNP IDs</b> | <b>Cultivars</b> | <b>Chromosomes/scaffolds</b> | <b>Physical positions (bp)</b> | <b>SNPs</b> |
|-------------|----------------|------------------|------------------------------|--------------------------------|-------------|
| 38380       | CadSNP13975    | <i>Desi</i>      | Ca_Desig_denovo              | 522698                         | (T/C)       |
| 38381       | CadSNP13976    | <i>Desi</i>      | Ca_Desig_denovo              | 528449                         | (C/T)       |
| 38382       | CadSNP13977    | <i>Desi</i>      | Ca_Desig_denovo              | 528480                         | (C/G)       |
| 38383       | CadSNP13978    | <i>Desi</i>      | Ca_Desig_denovo              | 533089                         | (C/T)       |
| 38384       | CadSNP13979    | <i>Desi</i>      | Ca_Desig_denovo              | 534683                         | (T/C)       |
| 38385       | CadSNP13980    | <i>Desi</i>      | Ca_Desig_denovo              | 535901                         | (C/T)       |
| 38386       | CadSNP13981    | <i>Desi</i>      | Ca_Desig_denovo              | 541246                         | (T/A)       |
| 38387       | CadSNP13982    | <i>Desi</i>      | Ca_Desig_denovo              | 548618                         | (A/G)       |
| 38388       | CadSNP13983    | <i>Desi</i>      | Ca_Desig_denovo              | 553328                         | (T/G)       |
| 38389       | CadSNP13984    | <i>Desi</i>      | Ca_Desig_denovo              | 554204                         | (A/G)       |
| 38390       | CadSNP13985    | <i>Desi</i>      | Ca_Desig_denovo              | 557906                         | (T/A)       |
| 38391       | CadSNP13986    | <i>Desi</i>      | Ca_Desig_denovo              | 557908                         | (C/A)       |
| 38392       | CadSNP13987    | <i>Desi</i>      | Ca_Desig_denovo              | 564982                         | (T/A)       |
| 38393       | CadSNP13988    | <i>Desi</i>      | Ca_Desig_denovo              | 564987                         | (T/G)       |
| 38394       | CadSNP13989    | <i>Desi</i>      | Ca_Desig_denovo              | 564996                         | (C/G)       |
| 38395       | CadSNP13990    | <i>Desi</i>      | Ca_Desig_denovo              | 565004                         | (A/G)       |
| 38396       | CadSNP13991    | <i>Desi</i>      | Ca_Desig_denovo              | 565009                         | (T/A)       |
| 38397       | CadSNP13992    | <i>Desi</i>      | Ca_Desig_denovo              | 565018                         | (C/G)       |
| 38398       | CadSNP13993    | <i>Desi</i>      | Ca_Desig_denovo              | 565022                         | (C/G)       |
| 38399       | CadSNP13994    | <i>Desi</i>      | Ca_Desig_denovo              | 565043                         | (T/G)       |
| 38400       | CadSNP13995    | <i>Desi</i>      | Ca_Desig_denovo              | 568227                         | (A/G)       |
| 38401       | CadSNP13996    | <i>Desi</i>      | Ca_Desig_denovo              | 568229                         | (G/A)       |
| 38402       | CadSNP13997    | <i>Desi</i>      | Ca_Desig_denovo              | 568630                         | (A/T)       |
| 38403       | CadSNP13998    | <i>Desi</i>      | Ca_Desig_denovo              | 568638                         | (T/C)       |
| 38404       | CadSNP13999    | <i>Desi</i>      | Ca_Desig_denovo              | 568647                         | (G/A)       |
| 38405       | CadSNP14000    | <i>Desi</i>      | Ca_Desig_denovo              | 568659                         | (A/T)       |
| 38406       | CadSNP14001    | <i>Desi</i>      | Ca_Desig_denovo              | 568926                         | (T/G)       |
| 38407       | CadSNP14002    | <i>Desi</i>      | Ca_Desig_denovo              | 573834                         | (T/G)       |
| 38408       | CadSNP14003    | <i>Desi</i>      | Ca_Desig_denovo              | 574459                         | (A/T)       |
| 38409       | CadSNP14004    | <i>Desi</i>      | Ca_Desig_denovo              | 580963                         | (T/C)       |
| 38410       | CadSNP14005    | <i>Desi</i>      | Ca_Desig_denovo              | 580971                         | (A/T)       |
| 38411       | CadSNP14006    | <i>Desi</i>      | Ca_Desig_denovo              | 580972                         | (A/T)       |
| 38412       | CadSNP14007    | <i>Desi</i>      | Ca_Desig_denovo              | 597471                         | (G/A)       |
| 38413       | CadSNP14008    | <i>Desi</i>      | Ca_Desig_denovo              | 611841                         | (A/C)       |
| 38414       | CadSNP14009    | <i>Desi</i>      | Ca_Desig_denovo              | 623049                         | (T/G)       |
| 38415       | CadSNP14010    | <i>Desi</i>      | Ca_Desig_denovo              | 623600                         | (A/G)       |
| 38416       | CadSNP14011    | <i>Desi</i>      | Ca_Desig_denovo              | 624082                         | (T/G)       |
| 38417       | CadSNP14012    | <i>Desi</i>      | Ca_Desig_denovo              | 626616                         | (T/C)       |

| <b>S.N.</b> | <b>SNP IDs</b> | <b>Cultivars</b> | <b>Chromosomes/scaffolds</b> | <b>Physical positions (bp)</b> | <b>SNPs</b> |
|-------------|----------------|------------------|------------------------------|--------------------------------|-------------|
| 38418       | CadSNP14013    | <i>Desi</i>      | Ca_Desig_denovo              | 630090                         | (A/T)       |
| 38419       | CadSNP14014    | <i>Desi</i>      | Ca_Desig_denovo              | 630091                         | (A/T)       |
| 38420       | CadSNP14015    | <i>Desi</i>      | Ca_Desig_denovo              | 630095                         | (C/G)       |
| 38421       | CadSNP14016    | <i>Desi</i>      | Ca_Desig_denovo              | 634673                         | (T/G)       |
| 38422       | CadSNP14017    | <i>Desi</i>      | Ca_Desig_denovo              | 634761                         | (C/T)       |
| 38423       | CadSNP14018    | <i>Desi</i>      | Ca_Desig_denovo              | 635060                         | (A/G)       |
| 38424       | CadSNP14019    | <i>Desi</i>      | Ca_Desig_denovo              | 635084                         | (T/G)       |
| 38425       | CadSNP14020    | <i>Desi</i>      | Ca_Desig_denovo              | 635107                         | (A/G)       |
| 38426       | CadSNP14021    | <i>Desi</i>      | Ca_Desig_denovo              | 635126                         | (T/G)       |
| 38427       | CadSNP14022    | <i>Desi</i>      | Ca_Desig_denovo              | 635141                         | (A/T)       |
| 38428       | CadSNP14023    | <i>Desi</i>      | Ca_Desig_denovo              | 635142                         | (T/G)       |
| 38429       | CadSNP14024    | <i>Desi</i>      | Ca_Desig_denovo              | 635201                         | (A/G)       |
| 38430       | CadSNP14025    | <i>Desi</i>      | Ca_Desig_denovo              | 635383                         | (C/G)       |
| 38431       | CadSNP14026    | <i>Desi</i>      | Ca_Desig_denovo              | 635409                         | (T/G)       |
| 38432       | CadSNP14027    | <i>Desi</i>      | Ca_Desig_denovo              | 635423                         | (G/A)       |
| 38433       | CadSNP14028    | <i>Desi</i>      | Ca_Desig_denovo              | 635481                         | (A/G)       |
| 38434       | CadSNP14029    | <i>Desi</i>      | Ca_Desig_denovo              | 635518                         | (T/C)       |
| 38435       | CadSNP14030    | <i>Desi</i>      | Ca_Desig_denovo              | 639465                         | (A/C)       |
| 38436       | CadSNP14031    | <i>Desi</i>      | Ca_Desig_denovo              | 640882                         | (A/T)       |
| 38437       | CadSNP14032    | <i>Desi</i>      | Ca_Desig_denovo              | 640920                         | (T/G)       |
| 38438       | CadSNP14033    | <i>Desi</i>      | Ca_Desig_denovo              | 640986                         | (G/A)       |
| 38439       | CadSNP14034    | <i>Desi</i>      | Ca_Desig_denovo              | 647092                         | (G/C)       |
| 38440       | CadSNP14035    | <i>Desi</i>      | Ca_Desig_denovo              | 647093                         | (T/A)       |
| 38441       | CadSNP14036    | <i>Desi</i>      | Ca_Desig_denovo              | 662748                         | (A/G)       |
| 38442       | CadSNP14037    | <i>Desi</i>      | Ca_Desig_denovo              | 670250                         | (T/A)       |
| 38443       | CadSNP14038    | <i>Desi</i>      | Ca_Desig_denovo              | 670251                         | (C/G)       |
| 38444       | CadSNP14039    | <i>Desi</i>      | Ca_Desig_denovo              | 670252                         | (G/A)       |
| 38445       | CadSNP14040    | <i>Desi</i>      | Ca_Desig_denovo              | 674273                         | (T/C)       |
| 38446       | CadSNP14041    | <i>Desi</i>      | Ca_Desig_denovo              | 674329                         | (T/G)       |
| 38447       | CadSNP14042    | <i>Desi</i>      | Ca_Desig_denovo              | 676182                         | (G/T)       |
| 38448       | CadSNP14043    | <i>Desi</i>      | Ca_Desig_denovo              | 676322                         | (G/A)       |
| 38449       | CadSNP14044    | <i>Desi</i>      | Ca_Desig_denovo              | 676896                         | (T/G)       |
| 38450       | CadSNP14045    | <i>Desi</i>      | Ca_Desig_denovo              | 676906                         | (T/G)       |
| 38451       | CadSNP14046    | <i>Desi</i>      | Ca_Desig_denovo              | 676937                         | (C/T)       |
| 38452       | CadSNP14047    | <i>Desi</i>      | Ca_Desig_denovo              | 676946                         | (G/T)       |
| 38453       | CadSNP14048    | <i>Desi</i>      | Ca_Desig_denovo              | 685076                         | (T/C)       |
| 38454       | CadSNP14049    | <i>Desi</i>      | Ca_Desig_denovo              | 687921                         | (T/G)       |
| 38455       | CadSNP14050    | <i>Desi</i>      | Ca_Desig_denovo              | 702397                         | (G/A)       |

| <b>S.N.</b> | <b>SNP IDs</b> | <b>Cultivars</b> | <b>Chromosomes/scaffolds</b> | <b>Physical positions (bp)</b> | <b>SNPs</b> |
|-------------|----------------|------------------|------------------------------|--------------------------------|-------------|
| 38456       | CadSNP14051    | <i>Desi</i>      | Ca_Desig_denovo              | 702474                         | (C/T)       |
| 38457       | CadSNP14052    | <i>Desi</i>      | Ca_Desig_denovo              | 702714                         | (C/A)       |
| 38458       | CadSNP14053    | <i>Desi</i>      | Ca_Desig_denovo              | 707993                         | (A/G)       |
| 38459       | CadSNP14054    | <i>Desi</i>      | Ca_Desig_denovo              | 723888                         | (A/C)       |
| 38460       | CadSNP14055    | <i>Desi</i>      | Ca_Desig_denovo              | 723889                         | (C/A)       |
| 38461       | CadSNP14056    | <i>Desi</i>      | Ca_Desig_denovo              | 723894                         | (T/A)       |
| 38462       | CadSNP14057    | <i>Desi</i>      | Ca_Desig_denovo              | 723897                         | (G/T)       |
| 38463       | CadSNP14058    | <i>Desi</i>      | Ca_Desig_denovo              | 723902                         | (G/C)       |
| 38464       | CadSNP14059    | <i>Desi</i>      | Ca_Desig_denovo              | 723905                         | (T/G)       |
| 38465       | CadSNP14060    | <i>Desi</i>      | Ca_Desig_denovo              | 728876                         | (G/T)       |
| 38466       | CadSNP14061    | <i>Desi</i>      | Ca_Desig_denovo              | 740874                         | (T/G)       |
| 38467       | CadSNP14062    | <i>Desi</i>      | Ca_Desig_denovo              | 765947                         | (A/C)       |
| 38468       | CadSNP14063    | <i>Desi</i>      | Ca_Desig_denovo              | 770554                         | (T/G)       |
| 38469       | CadSNP14064    | <i>Desi</i>      | Ca_Desig_denovo              | 784320                         | (T/G)       |
| 38470       | CadSNP14065    | <i>Desi</i>      | Ca_Desig_denovo              | 784361                         | (A/G)       |
| 38471       | CadSNP14066    | <i>Desi</i>      | Ca_Desig_denovo              | 789739                         | (A/G)       |
| 38472       | CadSNP14067    | <i>Desi</i>      | Ca_Desig_denovo              | 789741                         | (C/A)       |
| 38473       | CadSNP14068    | <i>Desi</i>      | Ca_Desig_denovo              | 813119                         | (G/C)       |
| 38474       | CadSNP14069    | <i>Desi</i>      | Ca_Desig_denovo              | 813129                         | (G/A)       |
| 38475       | CadSNP14070    | <i>Desi</i>      | Ca_Desig_denovo              | 813144                         | (A/G)       |
| 38476       | CadSNP14071    | <i>Desi</i>      | Ca_Desig_denovo              | 827851                         | (T/C)       |
| 38477       | CadSNP14072    | <i>Desi</i>      | Ca_Desig_denovo              | 827992                         | (A/G)       |
| 38478       | CadSNP14073    | <i>Desi</i>      | Ca_Desig_denovo              | 828026                         | (T/G)       |
| 38479       | CadSNP14074    | <i>Desi</i>      | Ca_Desig_denovo              | 828036                         | (G/A)       |
| 38480       | CadSNP14075    | <i>Desi</i>      | Ca_Desig_denovo              | 842494                         | (G/T)       |
| 38481       | CadSNP14076    | <i>Desi</i>      | Ca_Desig_denovo              | 842539                         | (T/C)       |
| 38482       | CadSNP14077    | <i>Desi</i>      | Ca_Desig_denovo              | 929463                         | (G/A)       |
| 38483       | CadSNP14078    | <i>Desi</i>      | Ca_Desig_denovo              | 929464                         | (G/A)       |
| 38484       | CadSNP14079    | <i>Desi</i>      | Ca_Desig_denovo              | 929467                         | (T/A)       |
| 38485       | CadSNP14080    | <i>Desi</i>      | Ca_Desig_denovo              | 929502                         | (G/A)       |
| 38486       | CadSNP14081    | <i>Desi</i>      | Ca_Desig_denovo              | 956913                         | (C/T)       |
| 38487       | CadSNP14082    | <i>Desi</i>      | Ca_Desig_denovo              | 956929                         | (G/A)       |
| 38488       | CadSNP14083    | <i>Desi</i>      | Ca_Desig_denovo              | 957099                         | (C/T)       |
| 38489       | CadSNP14084    | <i>Desi</i>      | Ca_Desig_denovo              | 959139                         | (G/A)       |
| 38490       | CadSNP14085    | <i>Desi</i>      | Ca_Desig_denovo              | 973418                         | (G/C)       |
| 38491       | CadSNP14086    | <i>Desi</i>      | Ca_Desig_denovo              | 992422                         | (G/A)       |
| 38492       | CadSNP14087    | <i>Desi</i>      | Ca_Desig_denovo              | 995675                         | (C/G)       |
| 38493       | CadSNP14088    | <i>Desi</i>      | Ca_Desig_denovo              | 995690                         | (C/G)       |

| <b>S.N.</b> | <b>SNP IDs</b> | <b>Cultivars</b> | <b>Chromosomes/scaffolds</b> | <b>Physical positions (bp)</b> | <b>SNPs</b> |
|-------------|----------------|------------------|------------------------------|--------------------------------|-------------|
| 38494       | CadSNP14089    | <i>Desi</i>      | Ca_Desig_denovo              | 1010473                        | (G/C)       |
| 38495       | CadSNP14090    | <i>Desi</i>      | Ca_Desig_denovo              | 1038273                        | (A/T)       |
| 38496       | CadSNP14091    | <i>Desi</i>      | Ca_Desig_denovo              | 1058822                        | (A/G)       |
| 38497       | CadSNP14092    | <i>Desi</i>      | Ca_Desig_denovo              | 1058823                        | (A/G)       |
| 38498       | CadSNP14093    | <i>Desi</i>      | Ca_Desig_denovo              | 1058825                        | (A/G)       |
| 38499       | CadSNP14094    | <i>Desi</i>      | Ca_Desig_denovo              | 1058826                        | (A/G)       |
| 38500       | CadSNP14095    | <i>Desi</i>      | Ca_Desig_denovo              | 1071353                        | (A/T)       |
| 38501       | CadSNP14096    | <i>Desi</i>      | Ca_Desig_denovo              | 1071361                        | (G/T)       |
| 38502       | CadSNP14097    | <i>Desi</i>      | Ca_Desig_denovo              | 1096168                        | (T/G)       |
| 38503       | CadSNP14098    | <i>Desi</i>      | Ca_Desig_denovo              | 1108501                        | (A/G)       |
| 38504       | CadSNP14099    | <i>Desi</i>      | Ca_Desig_denovo              | 1117483                        | (A/G)       |
| 38505       | CadSNP14100    | <i>Desi</i>      | Ca_Desig_denovo              | 1133057                        | (A/C)       |
| 38506       | CadSNP14101    | <i>Desi</i>      | Ca_Desig_denovo              | 1157757                        | (A/C)       |
| 38507       | CadSNP14102    | <i>Desi</i>      | Ca_Desig_denovo              | 1538981                        | (A/G)       |
| 38508       | CadSNP14103    | <i>Desi</i>      | Ca_Desig_denovo              | 1538982                        | (A/G)       |
| 38509       | CadSNP14104    | <i>Desi</i>      | Ca_Desig_denovo              | 1538984                        | (A/G)       |
| 38510       | CadSNP14105    | <i>Desi</i>      | Ca_Desig_denovo              | 1538985                        | (A/G)       |
| 38511       | CadSNP14106    | <i>Desi</i>      | Ca_Desig_denovo              | 1844290                        | (A/G)       |
| 38512       | CadSNP14107    | <i>Desi</i>      | Ca_Desig_denovo              | 1908293                        | (G/C)       |
| 38513       | CadSNP14108    | <i>Desi</i>      | Ca_Desig_denovo              | 1908308                        | (A/G)       |
| 38514       | CadSNP14109    | <i>Desi</i>      | Ca_Desig_denovo              | 1908313                        | (T/C)       |
| 38515       | CadSNP14110    | <i>Desi</i>      | Ca_Desig_denovo              | 1926138                        | (C/T)       |
| 38516       | CadSNP14111    | <i>Desi</i>      | Ca_Desig_denovo              | 1926153                        | (G/A)       |
| 38517       | CadSNP14112    | <i>Desi</i>      | Ca_Desig_denovo              | 2216494                        | (A/G)       |
| 38518       | CadSNP14113    | <i>Desi</i>      | Ca_Desig_denovo              | 2216522                        | (C/G)       |
| 38519       | CadSNP14114    | <i>Desi</i>      | Ca_Desig_denovo              | 2216535                        | (C/G)       |
| 38520       | CadSNP14115    | <i>Desi</i>      | Ca_Desig_denovo              | 2227361                        | (A/G)       |
| 38521       | CadSNP14116    | <i>Desi</i>      | Ca_Desig_denovo              | 2227377                        | (C/T)       |
| 38522       | CadSNP14117    | <i>Desi</i>      | Ca_Desig_denovo              | 2245560                        | (T/C)       |
| 38523       | CadSNP14118    | <i>Desi</i>      | Ca_Desig_denovo              | 2288750                        | (T/G)       |
| 38524       | CadSNP14119    | <i>Desi</i>      | Ca_Desig_denovo              | 2288778                        | (T/G)       |
| 38525       | CadSNP14120    | <i>Desi</i>      | Ca_Desig_denovo              | 2288789                        | (A/G)       |
| 38526       | CadSNP14121    | <i>Desi</i>      | Ca_Desig_denovo              | 2298599                        | (G/A)       |
| 38527       | CadSNP14122    | <i>Desi</i>      | Ca_Desig_denovo              | 2298611                        | (G/A)       |
| 38528       | CadSNP14123    | <i>Desi</i>      | Ca_Desig_denovo              | 2298648                        | (T/G)       |
| 38529       | CadSNP14124    | <i>Desi</i>      | Ca_Desig_denovo              | 2316648                        | (G/A)       |
| 38530       | CadSNP14125    | <i>Desi</i>      | Ca_Desig_denovo              | 2316706                        | (T/G)       |
| 38531       | CadSNP14126    | <i>Desi</i>      | Ca_Desig_denovo              | 2317870                        | (G/C)       |



| <b>S.N.</b> | <b>SNP IDs</b> | <b>Cultivars</b> | <b>Chromosomes/scaffolds</b> | <b>Physical positions (bp)</b> | <b>SNPs</b> |
|-------------|----------------|------------------|------------------------------|--------------------------------|-------------|
| 38532       | CadSNP14127    | <i>Desi</i>      | Ca_Desig_denovo              | 2337472                        | (G/C)       |
| 38533       | CadSNP14128    | <i>Desi</i>      | Ca_Desig_denovo              | 2337484                        | (A/G)       |
| 38534       | CadSNP14129    | <i>Desi</i>      | Ca_Desig_denovo              | 2362293                        | (A/C)       |
| 38535       | CadSNP14130    | <i>Desi</i>      | Ca_Desig_denovo              | 2364021                        | (T/C)       |
| 38536       | CadSNP14131    | <i>Desi</i>      | Ca_Desig_denovo              | 2395363                        | (G/A)       |
| 38537       | CadSNP14132    | <i>Desi</i>      | Ca_Desig_denovo              | 2405692                        | (C/T)       |
| 38538       | CadSNP14133    | <i>Desi</i>      | Ca_Desig_denovo              | 2438654                        | (G/C)       |
| 38539       | CadSNP14134    | <i>Desi</i>      | Ca_Desig_denovo              | 2438656                        | (G/T)       |
| 38540       | CadSNP14135    | <i>Desi</i>      | Ca_Desig_denovo              | 2438657                        | (C/G)       |
| 38541       | CadSNP14136    | <i>Desi</i>      | Ca_Desig_denovo              | 2438672                        | (G/A)       |
| 38542       | CadSNP14137    | <i>Desi</i>      | Ca_Desig_denovo              | 2438678                        | (G/A)       |
| 38543       | CadSNP14138    | <i>Desi</i>      | Ca_Desig_denovo              | 2463272                        | (G/A)       |
| 38544       | CadSNP14139    | <i>Desi</i>      | Ca_Desig_denovo              | 2464127                        | (A/C)       |
| 38545       | CadSNP14140    | <i>Desi</i>      | Ca_Desig_denovo              | 2475557                        | (G/A)       |
| 38546       | CadSNP14141    | <i>Desi</i>      | Ca_Desig_denovo              | 2488966                        | (G/C)       |
| 38547       | CadSNP14142    | <i>Desi</i>      | Ca_Desig_denovo              | 2488968                        | (C/A)       |
| 38548       | CadSNP14143    | <i>Desi</i>      | Ca_Desig_denovo              | 2488987                        | (G/A)       |
| 38549       | CadSNP14144    | <i>Desi</i>      | Ca_Desig_denovo              | 2533811                        | (G/A)       |
| 38550       | CadSNP14145    | <i>Desi</i>      | Ca_Desig_denovo              | 2533871                        | (C/T)       |
| 38551       | CadSNP14146    | <i>Desi</i>      | Ca_Desig_denovo              | 2567757                        | (T/A)       |
| 38552       | CadSNP14147    | <i>Desi</i>      | Ca_Desig_denovo              | 2567759                        | (G/T)       |
| 38553       | CadSNP14148    | <i>Desi</i>      | Ca_Desig_denovo              | 2568211                        | (G/A)       |
| 38554       | CadSNP14149    | <i>Desi</i>      | Ca_Desig_denovo              | 2585766                        | (G/A)       |
| 38555       | CadSNP14150    | <i>Desi</i>      | Ca_Desig_denovo              | 2592770                        | (C/A)       |
| 38556       | CadSNP14151    | <i>Desi</i>      | Ca_Desig_denovo              | 2598885                        | (C/A)       |
| 38557       | CadSNP14152    | <i>Desi</i>      | Ca_Desig_denovo              | 2598886                        | (A/G)       |
| 38558       | CadSNP14153    | <i>Desi</i>      | Ca_Desig_denovo              | 2608766                        | (G/T)       |
| 38559       | CadSNP14154    | <i>Desi</i>      | Ca_Desig_denovo              | 2608769                        | (G/A)       |
| 38560       | CadSNP14155    | <i>Desi</i>      | Ca_Desig_denovo              | 2630336                        | (G/A)       |
| 38561       | CadSNP14156    | <i>Desi</i>      | Ca_Desig_denovo              | 2630345                        | (G/A)       |
| 38562       | CadSNP14157    | <i>Desi</i>      | Ca_Desig_denovo              | 2630354                        | (C/T)       |
| 38563       | CadSNP14158    | <i>Desi</i>      | Ca_Desig_denovo              | 2656751                        | (C/G)       |
| 38564       | CadSNP14159    | <i>Desi</i>      | Ca_Desig_denovo              | 2656760                        | (G/C)       |
| 38565       | CadSNP14160    | <i>Desi</i>      | Ca_Desig_denovo              | 2656772                        | (G/C)       |
| 38566       | CadSNP14161    | <i>Desi</i>      | Ca_Desig_denovo              | 2658239                        | (G/C)       |
| 38567       | CadSNP14162    | <i>Desi</i>      | Ca_Desig_denovo              | 2658240                        | (T/C)       |
| 38568       | CadSNP14163    | <i>Desi</i>      | Ca_Desig_denovo              | 2721315                        | (A/G)       |
| 38569       | CadSNP14164    | <i>Desi</i>      | Ca_Desig_denovo              | 2738676                        | (G/A)       |

| <b>S.N.</b> | <b>SNP IDs</b> | <b>Cultivars</b> | <b>Chromosomes/scaffolds</b> | <b>Physical positions (bp)</b> | <b>SNPs</b> |
|-------------|----------------|------------------|------------------------------|--------------------------------|-------------|
| 38570       | CadSNP14165    | <i>Desi</i>      | Ca_Desig_denovo              | 2738702                        | (G/C)       |
| 38571       | CadSNP14166    | <i>Desi</i>      | Ca_Desig_denovo              | 2747692                        | (A/G)       |
| 38572       | CadSNP14167    | <i>Desi</i>      | Ca_Desig_denovo              | 2766122                        | (C/A)       |
| 38573       | CadSNP14168    | <i>Desi</i>      | Ca_Desig_denovo              | 2766130                        | (C/G)       |
| 38574       | CadSNP14169    | <i>Desi</i>      | Ca_Desig_denovo              | 2782295                        | (T/C)       |
| 38575       | CadSNP14170    | <i>Desi</i>      | Ca_Desig_denovo              | 2788209                        | (T/A)       |
| 38576       | CadSNP14171    | <i>Desi</i>      | Ca_Desig_denovo              | 2818170                        | (C/A)       |
| 38577       | CadSNP14172    | <i>Desi</i>      | Ca_Desig_denovo              | 2826749                        | (C/G)       |
| 38578       | CadSNP14173    | <i>Desi</i>      | Ca_Desig_denovo              | 2826774                        | (T/C)       |
| 38579       | CadSNP14174    | <i>Desi</i>      | Ca_Desig_denovo              | 2840175                        | (G/A)       |
| 38580       | CadSNP14175    | <i>Desi</i>      | Ca_Desig_denovo              | 2840178                        | (C/T)       |
| 38581       | CadSNP14176    | <i>Desi</i>      | Ca_Desig_denovo              | 2843980                        | (G/C)       |
| 38582       | CadSNP14177    | <i>Desi</i>      | Ca_Desig_denovo              | 2844001                        | (G/A)       |
| 38583       | CadSNP14178    | <i>Desi</i>      | Ca_Desig_denovo              | 2876963                        | (A/C)       |
| 38584       | CadSNP14179    | <i>Desi</i>      | Ca_Desig_denovo              | 2876966                        | (G/A)       |
| 38585       | CadSNP14180    | <i>Desi</i>      | Ca_Desig_denovo              | 2876996                        | (G/A)       |
| 38586       | CadSNP14181    | <i>Desi</i>      | Ca_Desig_denovo              | 2912860                        | (G/C)       |
| 38587       | CadSNP14182    | <i>Desi</i>      | Ca_Desig_denovo              | 2912920                        | (A/C)       |
| 38588       | CadSNP14183    | <i>Desi</i>      | Ca_Desig_denovo              | 2923602                        | (G/C)       |
| 38589       | CadSNP14184    | <i>Desi</i>      | Ca_Desig_denovo              | 2923620                        | (C/T)       |
| 38590       | CadSNP14185    | <i>Desi</i>      | Ca_Desig_denovo              | 2928724                        | (A/G)       |
| 38591       | CadSNP14186    | <i>Desi</i>      | Ca_Desig_denovo              | 2928725                        | (C/G)       |
| 38592       | CadSNP14187    | <i>Desi</i>      | Ca_Desig_denovo              | 2956912                        | (A/G)       |
| 38593       | CadSNP14188    | <i>Desi</i>      | Ca_Desig_denovo              | 2983262                        | (C/T)       |
| 38594       | CadSNP14189    | <i>Desi</i>      | Ca_Desig_denovo              | 2983271                        | (T/A)       |
| 38595       | CadSNP14190    | <i>Desi</i>      | Ca_Desig_denovo              | 2983288                        | (T/C)       |
| 38596       | CadSNP14191    | <i>Desi</i>      | Ca_Desig_denovo              | 2985300                        | (A/C)       |
| 38597       | CadSNP14192    | <i>Desi</i>      | Ca_Desig_denovo              | 3004633                        | (G/A)       |
| 38598       | CadSNP14193    | <i>Desi</i>      | Ca_Desig_denovo              | 3004637                        | (A/G)       |
| 38599       | CadSNP14194    | <i>Desi</i>      | Ca_Desig_denovo              | 3206616                        | (C/T)       |
| 38600       | CadSNP14195    | <i>Desi</i>      | Ca_Desig_denovo              | 3206626                        | (C/T)       |
| 38601       | CadSNP14196    | <i>Desi</i>      | Ca_Desig_denovo              | 3236360                        | (T/C)       |
| 38602       | CadSNP14197    | <i>Desi</i>      | Ca_Desig_denovo              | 3294631                        | (C/T)       |
| 38603       | CadSNP14198    | <i>Desi</i>      | Ca_Desig_denovo              | 3294661                        | (C/T)       |
| 38604       | CadSNP14199    | <i>Desi</i>      | Ca_Desig_denovo              | 3294664                        | (T/G)       |
| 38605       | CadSNP14200    | <i>Desi</i>      | Ca_Desig_denovo              | 3313722                        | (C/A)       |
| 38606       | CadSNP14201    | <i>Desi</i>      | Ca_Desig_denovo              | 3325319                        | (A/G)       |
| 38607       | CadSNP14202    | <i>Desi</i>      | Ca_Desig_denovo              | 3325352                        | (T/C)       |

| <b>S.N.</b> | <b>SNP IDs</b> | <b>Cultivars</b> | <b>Chromosomes/scaffolds</b> | <b>Physical positions (bp)</b> | <b>SNPs</b> |
|-------------|----------------|------------------|------------------------------|--------------------------------|-------------|
| 38608       | CadSNP14203    | <i>Desi</i>      | Ca_Desig_denovo              | 3325374                        | (C/G)       |
| 38609       | CadSNP14204    | <i>Desi</i>      | Ca_Desig_denovo              | 3349236                        | (G/C)       |
| 38610       | CadSNP14205    | <i>Desi</i>      | Ca_Desig_denovo              | 3378343                        | (C/G)       |
| 38611       | CadSNP14206    | <i>Desi</i>      | Ca_Desig_denovo              | 3378349                        | (T/C)       |
| 38612       | CadSNP14207    | <i>Desi</i>      | Ca_Desig_denovo              | 3378352                        | (A/C)       |
| 38613       | CadSNP14208    | <i>Desi</i>      | Ca_Desig_denovo              | 3387368                        | (C/G)       |
| 38614       | CadSNP14209    | <i>Desi</i>      | Ca_Desig_denovo              | 3387377                        | (G/C)       |
| 38615       | CadSNP14210    | <i>Desi</i>      | Ca_Desig_denovo              | 3390136                        | (G/C)       |
| 38616       | CadSNP14211    | <i>Desi</i>      | Ca_Desig_denovo              | 3399894                        | (A/C)       |
| 38617       | CadSNP14212    | <i>Desi</i>      | Ca_Desig_denovo              | 3413026                        | (C/A)       |
| 38618       | CadSNP14213    | <i>Desi</i>      | Ca_Desig_denovo              | 3413031                        | (G/C)       |
| 38619       | CadSNP14214    | <i>Desi</i>      | Ca_Desig_denovo              | 3413046                        | (C/T)       |
| 38620       | CadSNP14215    | <i>Desi</i>      | Ca_Desig_denovo              | 3427180                        | (T/C)       |
| 38621       | CadSNP14216    | <i>Desi</i>      | Ca_Desig_denovo              | 3435270                        | (A/G)       |
| 38622       | CadSNP14217    | <i>Desi</i>      | Ca_Desig_denovo              | 3435276                        | (T/C)       |
| 38623       | CadSNP14218    | <i>Desi</i>      | Ca_Desig_denovo              | 3435324                        | (T/C)       |
| 38624       | CadSNP14219    | <i>Desi</i>      | Ca_Desig_denovo              | 3440127                        | (T/C)       |
| 38625       | CadSNP14220    | <i>Desi</i>      | Ca_Desig_denovo              | 3449238                        | (C/G)       |
| 38626       | CadSNP14221    | <i>Desi</i>      | Ca_Desig_denovo              | 3449253                        | (G/A)       |
| 38627       | CadSNP14222    | <i>Desi</i>      | Ca_Desig_denovo              | 3462794                        | (T/G)       |
| 38628       | CadSNP14223    | <i>Desi</i>      | Ca_Desig_denovo              | 3471355                        | (C/T)       |
| 38629       | CadSNP14224    | <i>Desi</i>      | Ca_Desig_denovo              | 3490222                        | (T/C)       |
| 38630       | CadSNP14225    | <i>Desi</i>      | Ca_Desig_denovo              | 3490228                        | (C/T)       |
| 38631       | CadSNP14226    | <i>Desi</i>      | Ca_Desig_denovo              | 3490237                        | (C/G)       |
| 38632       | CadSNP14227    | <i>Desi</i>      | Ca_Desig_denovo              | 3495340                        | (G/A)       |
| 38633       | CadSNP14228    | <i>Desi</i>      | Ca_Desig_denovo              | 3495352                        | (A/G)       |
| 38634       | CadSNP14229    | <i>Desi</i>      | Ca_Desig_denovo              | 3495361                        | (G/C)       |
| 38635       | CadSNP14230    | <i>Desi</i>      | Ca_Desig_denovo              | 3504261                        | (C/T)       |
| 38636       | CadSNP14231    | <i>Desi</i>      | Ca_Desig_denovo              | 3504267                        | (T/C)       |
| 38637       | CadSNP14232    | <i>Desi</i>      | Ca_Desig_denovo              | 3636785                        | (C/G)       |
| 38638       | CadSNP14233    | <i>Desi</i>      | Ca_Desig_denovo              | 3636799                        | (C/G)       |
| 38639       | CadSNP14234    | <i>Desi</i>      | Ca_Desig_denovo              | 3636800                        | (C/G)       |
| 38640       | CadSNP14235    | <i>Desi</i>      | Ca_Desig_denovo              | 3636806                        | (A/G)       |
| 38641       | CadSNP14236    | <i>Desi</i>      | Ca_Desig_denovo              | 3682842                        | (C/T)       |
| 38642       | CadSNP14237    | <i>Desi</i>      | Ca_Desig_denovo              | 3713579                        | (A/C)       |
| 38643       | CadSNP14238    | <i>Desi</i>      | Ca_Desig_denovo              | 3716629                        | (C/G)       |
| 38644       | CadSNP14239    | <i>Desi</i>      | Ca_Desig_denovo              | 3729073                        | (C/T)       |
| 38645       | CadSNP14240    | <i>Desi</i>      | Ca_Desig_denovo              | 3729079                        | (G/A)       |

| <b>S.N.</b> | <b>SNP IDs</b> | <b>Cultivars</b> | <b>Chromosomes/scaffolds</b> | <b>Physical positions (bp)</b> | <b>SNPs</b> |
|-------------|----------------|------------------|------------------------------|--------------------------------|-------------|
| 38646       | CadSNP14241    | <i>Desi</i>      | Ca_Desig_denovo              | 3747382                        | (C/G)       |
| 38647       | CadSNP14242    | <i>Desi</i>      | Ca_Desig_denovo              | 3804817                        | (A/G)       |
| 38648       | CadSNP14243    | <i>Desi</i>      | Ca_Desig_denovo              | 3810861                        | (A/C)       |
| 38649       | CadSNP14244    | <i>Desi</i>      | Ca_Desig_denovo              | 3825648                        | (A/C)       |
| 38650       | CadSNP14245    | <i>Desi</i>      | Ca_Desig_denovo              | 3848432                        | (A/C)       |
| 38651       | CadSNP14246    | <i>Desi</i>      | Ca_Desig_denovo              | 3855306                        | (T/C)       |
| 38652       | CadSNP14247    | <i>Desi</i>      | Ca_Desig_denovo              | 3891809                        | (G/C)       |
| 38653       | CadSNP14248    | <i>Desi</i>      | Ca_Desig_denovo              | 3893549                        | (G/A)       |
| 38654       | CadSNP14249    | <i>Desi</i>      | Ca_Desig_denovo              | 3907988                        | (G/C)       |
| 38655       | CadSNP14250    | <i>Desi</i>      | Ca_Desig_denovo              | 3909676                        | (C/G)       |
| 38656       | CadSNP14251    | <i>Desi</i>      | Ca_Desig_denovo              | 3933740                        | (A/G)       |
| 38657       | CadSNP14252    | <i>Desi</i>      | Ca_Desig_denovo              | 3955406                        | (G/C)       |
| 38658       | CadSNP14253    | <i>Desi</i>      | Ca_Desig_denovo              | 3955424                        | (C/T)       |
| 38659       | CadSNP14254    | <i>Desi</i>      | Ca_Desig_denovo              | 3955427                        | (T/C)       |
| 38660       | CadSNP14255    | <i>Desi</i>      | Ca_Desig_denovo              | 3962570                        | (G/A)       |
| 38661       | CadSNP14256    | <i>Desi</i>      | Ca_Desig_denovo              | 3972385                        | (A/G)       |
| 38662       | CadSNP14257    | <i>Desi</i>      | Ca_Desig_denovo              | 3986458                        | (T/A)       |
| 38663       | CadSNP14258    | <i>Desi</i>      | Ca_Desig_denovo              | 4006808                        | (C/T)       |
| 38664       | CadSNP14259    | <i>Desi</i>      | Ca_Desig_denovo              | 4016783                        | (C/T)       |
| 38665       | CadSNP14260    | <i>Desi</i>      | Ca_Desig_denovo              | 4079180                        | (T/C)       |
| 38666       | CadSNP14261    | <i>Desi</i>      | Ca_Desig_denovo              | 4079210                        | (A/G)       |
| 38667       | CadSNP14262    | <i>Desi</i>      | Ca_Desig_denovo              | 4122055                        | (C/T)       |
| 38668       | CadSNP14263    | <i>Desi</i>      | Ca_Desig_denovo              | 4128098                        | (A/G)       |
| 38669       | CadSNP14264    | <i>Desi</i>      | Ca_Desig_denovo              | 4128113                        | (A/G)       |
| 38670       | CadSNP14265    | <i>Desi</i>      | Ca_Desig_denovo              | 4152630                        | (G/T)       |
| 38671       | CadSNP14266    | <i>Desi</i>      | Ca_Desig_denovo              | 4166827                        | (C/T)       |
| 38672       | CadSNP14267    | <i>Desi</i>      | Ca_Desig_denovo              | 4166835                        | (G/T)       |
| 38673       | CadSNP14268    | <i>Desi</i>      | Ca_Desig_denovo              | 4178217                        | (C/T)       |
| 38674       | CadSNP14269    | <i>Desi</i>      | Ca_Desig_denovo              | 4178298                        | (A/G)       |
| 38675       | CadSNP14270    | <i>Desi</i>      | Ca_Desig_denovo              | 4179721                        | (G/A)       |
| 38676       | CadSNP14271    | <i>Desi</i>      | Ca_Desig_denovo              | 4179724                        | (T/G)       |
| 38677       | CadSNP14272    | <i>Desi</i>      | Ca_Desig_denovo              | 4185804                        | (T/A)       |
| 38678       | CadSNP14273    | <i>Desi</i>      | Ca_Desig_denovo              | 4199092                        | (G/A)       |
| 38679       | CadSNP14274    | <i>Desi</i>      | Ca_Desig_denovo              | 4199095                        | (A/G)       |
| 38680       | CadSNP14275    | <i>Desi</i>      | Ca_Desig_denovo              | 4202520                        | (C/T)       |
| 38681       | CadSNP14276    | <i>Desi</i>      | Ca_Desig_denovo              | 4208390                        | (T/G)       |
| 38682       | CadSNP14277    | <i>Desi</i>      | Ca_Desig_denovo              | 4208402                        | (A/G)       |
| 38683       | CadSNP14278    | <i>Desi</i>      | Ca_Desig_denovo              | 4214482                        | (A/C)       |

| <b>S.N.</b> | <b>SNP IDs</b> | <b>Cultivars</b> | <b>Chromosomes/scaffolds</b> | <b>Physical positions (bp)</b> | <b>SNPs</b> |
|-------------|----------------|------------------|------------------------------|--------------------------------|-------------|
| 38684       | CadSNP14279    | <i>Desi</i>      | Ca_Desig_denovo              | 4291216                        | (C/T)       |
| 38685       | CadSNP14280    | <i>Desi</i>      | Ca_Desig_denovo              | 4291237                        | (C/G)       |
| 38686       | CadSNP14281    | <i>Desi</i>      | Ca_Desig_denovo              | 4291401                        | (G/A)       |
| 38687       | CadSNP14282    | <i>Desi</i>      | Ca_Desig_denovo              | 4367205                        | (C/G)       |
| 38688       | CadSNP14283    | <i>Desi</i>      | Ca_Desig_denovo              | 4367231                        | (C/T)       |
| 38689       | CadSNP14284    | <i>Desi</i>      | Ca_Desig_denovo              | 4396676                        | (C/T)       |
| 38690       | CadSNP14285    | <i>Desi</i>      | Ca_Desig_denovo              | 4396712                        | (C/A)       |
| 38691       | CadSNP14286    | <i>Desi</i>      | Ca_Desig_denovo              | 4405942                        | (C/G)       |
| 38692       | CadSNP14287    | <i>Desi</i>      | Ca_Desig_denovo              | 4420212                        | (A/T)       |
| 38693       | CadSNP14288    | <i>Desi</i>      | Ca_Desig_denovo              | 4429216                        | (C/T)       |
| 38694       | CadSNP14289    | <i>Desi</i>      | Ca_Desig_denovo              | 4429218                        | (G/T)       |
| 38695       | CadSNP14290    | <i>Desi</i>      | Ca_Desig_denovo              | 4433961                        | (A/C)       |
| 38696       | CadSNP14291    | <i>Desi</i>      | Ca_Desig_denovo              | 4493879                        | (T/C)       |
| 38697       | CadSNP14292    | <i>Desi</i>      | Ca_Desig_denovo              | 4493891                        | (C/G)       |
| 38698       | CadSNP14293    | <i>Desi</i>      | Ca_Desig_denovo              | 4516100                        | (A/G)       |
| 38699       | CadSNP14294    | <i>Desi</i>      | Ca_Desig_denovo              | 4516115                        | (A/G)       |
| 38700       | CadSNP14295    | <i>Desi</i>      | Ca_Desig_denovo              | 4517853                        | (A/T)       |
| 38701       | CadSNP14296    | <i>Desi</i>      | Ca_Desig_denovo              | 4517854                        | (C/T)       |
| 38702       | CadSNP14297    | <i>Desi</i>      | Ca_Desig_denovo              | 4561948                        | (C/T)       |
| 38703       | CadSNP14298    | <i>Desi</i>      | Ca_Desig_denovo              | 4561993                        | (G/A)       |
| 38704       | CadSNP14299    | <i>Desi</i>      | Ca_Desig_denovo              | 4585454                        | (G/T)       |
| 38705       | CadSNP14300    | <i>Desi</i>      | Ca_Desig_denovo              | 4585457                        | (A/T)       |
| 38706       | CadSNP14301    | <i>Desi</i>      | Ca_Desig_denovo              | 4588751                        | (C/G)       |
| 38707       | CadSNP14302    | <i>Desi</i>      | Ca_Desig_denovo              | 4588757                        | (A/G)       |
| 38708       | CadSNP14303    | <i>Desi</i>      | Ca_Desig_denovo              | 4602987                        | (T/G)       |
| 38709       | CadSNP14304    | <i>Desi</i>      | Ca_Desig_denovo              | 4602988                        | (T/A)       |
| 38710       | CadSNP14305    | <i>Desi</i>      | Ca_Desig_denovo              | 4609225                        | (C/T)       |
| 38711       | CadSNP14306    | <i>Desi</i>      | Ca_Desig_denovo              | 4617670                        | (C/G)       |
| 38712       | CadSNP14307    | <i>Desi</i>      | Ca_Desig_denovo              | 4651860                        | (A/C)       |
| 38713       | CadSNP14308    | <i>Desi</i>      | Ca_Desig_denovo              | 4654923                        | (G/C)       |
| 38714       | CadSNP14309    | <i>Desi</i>      | Ca_Desig_denovo              | 4684365                        | (T/A)       |
| 38715       | CadSNP14310    | <i>Desi</i>      | Ca_Desig_denovo              | 4692364                        | (G/A)       |
| 38716       | CadSNP14311    | <i>Desi</i>      | Ca_Desig_denovo              | 4698467                        | (C/A)       |
| 38717       | CadSNP14312    | <i>Desi</i>      | Ca_Desig_denovo              | 4698478                        | (G/A)       |
| 38718       | CadSNP14313    | <i>Desi</i>      | Ca_Desig_denovo              | 4699581                        | (G/A)       |
| 38719       | CadSNP14314    | <i>Desi</i>      | Ca_Desig_denovo              | 4699607                        | (G/C)       |
| 38720       | CadSNP14315    | <i>Desi</i>      | Ca_Desig_denovo              | 4711654                        | (C/T)       |
| 38721       | CadSNP14316    | <i>Desi</i>      | Ca_Desig_denovo              | 4722392                        | (C/T)       |

| <b>S.N.</b> | <b>SNP IDs</b> | <b>Cultivars</b> | <b>Chromosomes/scaffolds</b> | <b>Physical positions (bp)</b> | <b>SNPs</b> |
|-------------|----------------|------------------|------------------------------|--------------------------------|-------------|
| 38722       | CadSNP14317    | <i>Desi</i>      | Ca_Desig_denovo              | 4722398                        | (G/A)       |
| 38723       | CadSNP14318    | <i>Desi</i>      | Ca_Desig_denovo              | 4723518                        | (C/G)       |
| 38724       | CadSNP14319    | <i>Desi</i>      | Ca_Desig_denovo              | 4744879                        | (G/A)       |
| 38725       | CadSNP14320    | <i>Desi</i>      | Ca_Desig_denovo              | 4762723                        | (A/G)       |
| 38726       | CadSNP14321    | <i>Desi</i>      | Ca_Desig_denovo              | 4762736                        | (C/T)       |
| 38727       | CadSNP14322    | <i>Desi</i>      | Ca_Desig_denovo              | 4762744                        | (T/C)       |
| 38728       | CadSNP14323    | <i>Desi</i>      | Ca_Desig_denovo              | 4784056                        | (G/A)       |
| 38729       | CadSNP14324    | <i>Desi</i>      | Ca_Desig_denovo              | 4805522                        | (C/T)       |
| 38730       | CadSNP14325    | <i>Desi</i>      | Ca_Desig_denovo              | 4820107                        | (A/C)       |
| 38731       | CadSNP14326    | <i>Desi</i>      | Ca_Desig_denovo              | 4820119                        | (G/C)       |
| 38732       | CadSNP14327    | <i>Desi</i>      | Ca_Desig_denovo              | 4830028                        | (A/G)       |
| 38733       | CadSNP14328    | <i>Desi</i>      | Ca_Desig_denovo              | 4844460                        | (A/C)       |
| 38734       | CadSNP14329    | <i>Desi</i>      | Ca_Desig_denovo              | 4858333                        | (G/A)       |
| 38735       | CadSNP14330    | <i>Desi</i>      | Ca_Desig_denovo              | 4858342                        | (C/T)       |
| 38736       | CadSNP14331    | <i>Desi</i>      | Ca_Desig_denovo              | 4860194                        | (T/C)       |
| 38737       | CadSNP14332    | <i>Desi</i>      | Ca_Desig_denovo              | 4871184                        | (G/A)       |
| 38738       | CadSNP14333    | <i>Desi</i>      | Ca_Desig_denovo              | 4872847                        | (A/G)       |
| 38739       | CadSNP14334    | <i>Desi</i>      | Ca_Desig_denovo              | 4872849                        | (G/A)       |
| 38740       | CadSNP14335    | <i>Desi</i>      | Ca_Desig_denovo              | 4872854                        | (G/C)       |
| 38741       | CadSNP14336    | <i>Desi</i>      | Ca_Desig_denovo              | 4872856                        | (C/G)       |
| 38742       | CadSNP14337    | <i>Desi</i>      | Ca_Desig_denovo              | 4872857                        | (A/C)       |
| 38743       | CadSNP14338    | <i>Desi</i>      | Ca_Desig_denovo              | 4872887                        | (T/G)       |
| 38744       | CadSNP14339    | <i>Desi</i>      | Ca_Desig_denovo              | 4895250                        | (A/T)       |
| 38745       | CadSNP14340    | <i>Desi</i>      | Ca_Desig_denovo              | 4895288                        | (C/T)       |
| 38746       | CadSNP14341    | <i>Desi</i>      | Ca_Desig_denovo              | 4903067                        | (T/C)       |
| 38747       | CadSNP14342    | <i>Desi</i>      | Ca_Desig_denovo              | 4903082                        | (G/A)       |
| 38748       | CadSNP14343    | <i>Desi</i>      | Ca_Desig_denovo              | 4909773                        | (C/A)       |
| 38749       | CadSNP14344    | <i>Desi</i>      | Ca_Desig_denovo              | 4958450                        | (C/T)       |
| 38750       | CadSNP14345    | <i>Desi</i>      | Ca_Desig_denovo              | 4967233                        | (T/G)       |
| 38751       | CadSNP14346    | <i>Desi</i>      | Ca_Desig_denovo              | 4967263                        | (C/T)       |
| 38752       | CadSNP14347    | <i>Desi</i>      | Ca_Desig_denovo              | 4977460                        | (A/G)       |
| 38753       | CadSNP14348    | <i>Desi</i>      | Ca_Desig_denovo              | 4982072                        | (T/C)       |
| 38754       | CadSNP14349    | <i>Desi</i>      | Ca_Desig_denovo              | 5001267                        | (C/G)       |
| 38755       | CadSNP14350    | <i>Desi</i>      | Ca_Desig_denovo              | 5001282                        | (A/G)       |
| 38756       | CadSNP14351    | <i>Desi</i>      | Ca_Desig_denovo              | 5027720                        | (C/G)       |
| 38757       | CadSNP14352    | <i>Desi</i>      | Ca_Desig_denovo              | 5028376                        | (C/G)       |
| 38758       | CadSNP14353    | <i>Desi</i>      | Ca_Desig_denovo              | 5061919                        | (C/G)       |
| 38759       | CadSNP14354    | <i>Desi</i>      | Ca_Desig_denovo              | 5075873                        | (A/G)       |

| <b>S.N.</b> | <b>SNP IDs</b> | <b>Cultivars</b> | <b>Chromosomes/scaffolds</b> | <b>Physical positions (bp)</b> | <b>SNPs</b> |
|-------------|----------------|------------------|------------------------------|--------------------------------|-------------|
| 38760       | CadSNP14355    | <i>Desi</i>      | Ca_Desig_denovo              | 5137227                        | (A/C)       |
| 38761       | CadSNP14356    | <i>Desi</i>      | Ca_Desig_denovo              | 5154310                        | (T/A)       |
| 38762       | CadSNP14357    | <i>Desi</i>      | Ca_Desig_denovo              | 5154731                        | (G/A)       |
| 38763       | CadSNP14358    | <i>Desi</i>      | Ca_Desig_denovo              | 5154741                        | (G/A)       |
| 38764       | CadSNP14359    | <i>Desi</i>      | Ca_Desig_denovo              | 5170486                        | (C/T)       |
| 38765       | CadSNP14360    | <i>Desi</i>      | Ca_Desig_denovo              | 5170760                        | (C/T)       |
| 38766       | CadSNP14361    | <i>Desi</i>      | Ca_Desig_denovo              | 5196796                        | (C/T)       |
| 38767       | CadSNP14362    | <i>Desi</i>      | Ca_Desig_denovo              | 5196841                        | (C/T)       |
| 38768       | CadSNP14363    | <i>Desi</i>      | Ca_Desig_denovo              | 5247170                        | (C/A)       |
| 38769       | CadSNP14364    | <i>Desi</i>      | Ca_Desig_denovo              | 5286013                        | (G/A)       |
| 38770       | CadSNP14365    | <i>Desi</i>      | Ca_Desig_denovo              | 5296138                        | (G/A)       |
| 38771       | CadSNP14366    | <i>Desi</i>      | Ca_Desig_denovo              | 5302064                        | (A/T)       |
| 38772       | CadSNP14367    | <i>Desi</i>      | Ca_Desig_denovo              | 5306389                        | (G/T)       |
| 38773       | CadSNP14368    | <i>Desi</i>      | Ca_Desig_denovo              | 5306393                        | (T/G)       |
| 38774       | CadSNP14369    | <i>Desi</i>      | Ca_Desig_denovo              | 5309450                        | (T/G)       |
| 38775       | CadSNP14370    | <i>Desi</i>      | Ca_Desig_denovo              | 5325105                        | (A/T)       |
| 38776       | CadSNP14371    | <i>Desi</i>      | Ca_Desig_denovo              | 5333942                        | (G/T)       |
| 38777       | CadSNP14372    | <i>Desi</i>      | Ca_Desig_denovo              | 5334522                        | (G/A)       |
| 38778       | CadSNP14373    | <i>Desi</i>      | Ca_Desig_denovo              | 5378246                        | (G/A)       |
| 38779       | CadSNP14374    | <i>Desi</i>      | Ca_Desig_denovo              | 5380881                        | (C/T)       |
| 38780       | CadSNP14375    | <i>Desi</i>      | Ca_Desig_denovo              | 5392831                        | (T/G)       |
| 38781       | CadSNP14376    | <i>Desi</i>      | Ca_Desig_denovo              | 5419320                        | (C/T)       |
| 38782       | CadSNP14377    | <i>Desi</i>      | Ca_Desig_denovo              | 5419368                        | (T/G)       |
| 38783       | CadSNP14378    | <i>Desi</i>      | Ca_Desig_denovo              | 5427916                        | (C/T)       |
| 38784       | CadSNP14379    | <i>Desi</i>      | Ca_Desig_denovo              | 5427935                        | (T/C)       |
| 38785       | CadSNP14380    | <i>Desi</i>      | Ca_Desig_denovo              | 5431124                        | (T/C)       |
| 38786       | CadSNP14381    | <i>Desi</i>      | Ca_Desig_denovo              | 5444137                        | (G/T)       |
| 38787       | CadSNP14382    | <i>Desi</i>      | Ca_Desig_denovo              | 5480174                        | (G/A)       |
| 38788       | CadSNP14383    | <i>Desi</i>      | Ca_Desig_denovo              | 5493200                        | (T/C)       |
| 38789       | CadSNP14384    | <i>Desi</i>      | Ca_Desig_denovo              | 5509528                        | (C/G)       |
| 38790       | CadSNP14385    | <i>Desi</i>      | Ca_Desig_denovo              | 5509535                        | (T/C)       |
| 38791       | CadSNP14386    | <i>Desi</i>      | Ca_Desig_denovo              | 5522046                        | (A/C)       |
| 38792       | CadSNP14387    | <i>Desi</i>      | Ca_Desig_denovo              | 5529942                        | (C/T)       |
| 38793       | CadSNP14388    | <i>Desi</i>      | Ca_Desig_denovo              | 5529966                        | (G/A)       |
| 38794       | CadSNP14389    | <i>Desi</i>      | Ca_Desig_denovo              | 5536855                        | (C/T)       |
| 38795       | CadSNP14390    | <i>Desi</i>      | Ca_Desig_denovo              | 5536861                        | (A/T)       |
| 38796       | CadSNP14391    | <i>Desi</i>      | Ca_Desig_denovo              | 5543043                        | (A/G)       |
| 38797       | CadSNP14392    | <i>Desi</i>      | Ca_Desig_denovo              | 5543047                        | (G/A)       |

| <b>S.N.</b> | <b>SNP IDs</b> | <b>Cultivars</b> | <b>Chromosomes/scaffolds</b> | <b>Physical positions (bp)</b> | <b>SNPs</b> |
|-------------|----------------|------------------|------------------------------|--------------------------------|-------------|
| 38798       | CadSNP14393    | <i>Desi</i>      | Ca_Desig_denovo              | 5551374                        | (C/T)       |
| 38799       | CadSNP14394    | <i>Desi</i>      | Ca_Desig_denovo              | 5594620                        | (C/T)       |
| 38800       | CadSNP14395    | <i>Desi</i>      | Ca_Desig_denovo              | 5594641                        | (C/G)       |
| 38801       | CadSNP14396    | <i>Desi</i>      | Ca_Desig_denovo              | 5594662                        | (C/G)       |
| 38802       | CadSNP14397    | <i>Desi</i>      | Ca_Desig_denovo              | 5599050                        | (C/T)       |
| 38803       | CadSNP14398    | <i>Desi</i>      | Ca_Desig_denovo              | 5617213                        | (A/C)       |
| 38804       | CadSNP14399    | <i>Desi</i>      | Ca_Desig_denovo              | 5625771                        | (C/G)       |
| 38805       | CadSNP14400    | <i>Desi</i>      | Ca_Desig_denovo              | 5625797                        | (C/T)       |
| 38806       | CadSNP14401    | <i>Desi</i>      | Ca_Desig_denovo              | 5685578                        | (T/C)       |
| 38807       | CadSNP14402    | <i>Desi</i>      | Ca_Desig_denovo              | 5685584                        | (G/C)       |
| 38808       | CadSNP14403    | <i>Desi</i>      | Ca_Desig_denovo              | 5725841                        | (G/C)       |
| 38809       | CadSNP14404    | <i>Desi</i>      | Ca_Desig_denovo              | 5725844                        | (G/A)       |
| 38810       | CadSNP14405    | <i>Desi</i>      | Ca_Desig_denovo              | 5725853                        | (T/G)       |
| 38811       | CadSNP14406    | <i>Desi</i>      | Ca_Desig_denovo              | 5729033                        | (A/C)       |
| 38812       | CadSNP14407    | <i>Desi</i>      | Ca_Desig_denovo              | 5732268                        | (A/G)       |
| 38813       | CadSNP14408    | <i>Desi</i>      | Ca_Desig_denovo              | 5732293                        | (G/C)       |
| 38814       | CadSNP14409    | <i>Desi</i>      | Ca_Desig_denovo              | 5737658                        | (A/G)       |
| 38815       | CadSNP14410    | <i>Desi</i>      | Ca_Desig_denovo              | 5773193                        | (G/T)       |
| 38816       | CadSNP14411    | <i>Desi</i>      | Ca_Desig_denovo              | 5773243                        | (G/A)       |
| 38817       | CadSNP14412    | <i>Desi</i>      | Ca_Desig_denovo              | 5810510                        | (G/A)       |
| 38818       | CadSNP14413    | <i>Desi</i>      | Ca_Desig_denovo              | 5849049                        | (G/A)       |
| 38819       | CadSNP14414    | <i>Desi</i>      | Ca_Desig_denovo              | 5851568                        | (A/G)       |
| 38820       | CadSNP14415    | <i>Desi</i>      | Ca_Desig_denovo              | 5851570                        | (T/C)       |
| 38821       | CadSNP14416    | <i>Desi</i>      | Ca_Desig_denovo              | 5851573                        | (T/G)       |
| 38822       | CadSNP14417    | <i>Desi</i>      | Ca_Desig_denovo              | 5870200                        | (G/A)       |
| 38823       | CadSNP14418    | <i>Desi</i>      | Ca_Desig_denovo              | 5870201                        | (G/A)       |
| 38824       | CadSNP14419    | <i>Desi</i>      | Ca_Desig_denovo              | 5870210                        | (C/G)       |
| 38825       | CadSNP14420    | <i>Desi</i>      | Ca_Desig_denovo              | 5917788                        | (A/C)       |
| 38826       | CadSNP14421    | <i>Desi</i>      | Ca_Desig_denovo              | 5917861                        | (G/C)       |
| 38827       | CadSNP14422    | <i>Desi</i>      | Ca_Desig_denovo              | 5929414                        | (A/G)       |
| 38828       | CadSNP14423    | <i>Desi</i>      | Ca_Desig_denovo              | 5929423                        | (A/G)       |
| 38829       | CadSNP14424    | <i>Desi</i>      | Ca_Desig_denovo              | 5979830                        | (C/T)       |
| 38830       | CadSNP14425    | <i>Desi</i>      | Ca_Desig_denovo              | 5979875                        | (G/T)       |
| 38831       | CadSNP14426    | <i>Desi</i>      | Ca_Desig_denovo              | 5989489                        | (A/G)       |
| 38832       | CadSNP14427    | <i>Desi</i>      | Ca_Desig_denovo              | 5989795                        | (T/C)       |
| 38833       | CadSNP14428    | <i>Desi</i>      | Ca_Desig_denovo              | 5995102                        | (T/C)       |
| 38834       | CadSNP14429    | <i>Desi</i>      | Ca_Desig_denovo              | 5996634                        | (T/C)       |
| 38835       | CadSNP14430    | <i>Desi</i>      | Ca_Desig_denovo              | 6010338                        | (T/C)       |



| <b>S.N.</b> | <b>SNP IDs</b> | <b>Cultivars</b> | <b>Chromosomes/scaffolds</b> | <b>Physical positions (bp)</b> | <b>SNPs</b> |
|-------------|----------------|------------------|------------------------------|--------------------------------|-------------|
| 38836       | CadSNP14431    | <i>Desi</i>      | Ca_Desig_denovo              | 6014962                        | (A/C)       |
| 38837       | CadSNP14432    | <i>Desi</i>      | Ca_Desig_denovo              | 6032654                        | (C/G)       |
| 38838       | CadSNP14433    | <i>Desi</i>      | Ca_Desig_denovo              | 6039909                        | (A/G)       |
| 38839       | CadSNP14434    | <i>Desi</i>      | Ca_Desig_denovo              | 6051724                        | (C/T)       |
| 38840       | CadSNP14435    | <i>Desi</i>      | Ca_Desig_denovo              | 6085535                        | (C/T)       |
| 38841       | CadSNP14436    | <i>Desi</i>      | Ca_Desig_denovo              | 6090345                        | (T/A)       |
| 38842       | CadSNP14437    | <i>Desi</i>      | Ca_Desig_denovo              | 6122608                        | (G/C)       |
| 38843       | CadSNP14438    | <i>Desi</i>      | Ca_Desig_denovo              | 6123325                        | (C/G)       |
| 38844       | CadSNP14439    | <i>Desi</i>      | Ca_Desig_denovo              | 6123332                        | (T/C)       |
| 38845       | CadSNP14440    | <i>Desi</i>      | Ca_Desig_denovo              | 6131707                        | (T/A)       |
| 38846       | CadSNP14441    | <i>Desi</i>      | Ca_Desig_denovo              | 6131770                        | (A/G)       |
| 38847       | CadSNP14442    | <i>Desi</i>      | Ca_Desig_denovo              | 6156337                        | (C/T)       |
| 38848       | CadSNP14443    | <i>Desi</i>      | Ca_Desig_denovo              | 6166487                        | (G/A)       |
| 38849       | CadSNP14444    | <i>Desi</i>      | Ca_Desig_denovo              | 6166549                        | (C/G)       |
| 38850       | CadSNP14445    | <i>Desi</i>      | Ca_Desig_denovo              | 6168233                        | (G/A)       |
| 38851       | CadSNP14446    | <i>Desi</i>      | Ca_Desig_denovo              | 6173030                        | (G/A)       |
| 38852       | CadSNP14447    | <i>Desi</i>      | Ca_Desig_denovo              | 6198560                        | (G/C)       |
| 38853       | CadSNP14448    | <i>Desi</i>      | Ca_Desig_denovo              | 6221791                        | (G/C)       |
| 38854       | CadSNP14449    | <i>Desi</i>      | Ca_Desig_denovo              | 6222266                        | (T/C)       |
| 38855       | CadSNP14450    | <i>Desi</i>      | Ca_Desig_denovo              | 6222269                        | (C/G)       |
| 38856       | CadSNP14451    | <i>Desi</i>      | Ca_Desig_denovo              | 6225265                        | (C/T)       |
| 38857       | CadSNP14452    | <i>Desi</i>      | Ca_Desig_denovo              | 6225268                        | (C/A)       |
| 38858       | CadSNP14453    | <i>Desi</i>      | Ca_Desig_denovo              | 6229801                        | (G/C)       |
| 38859       | CadSNP14454    | <i>Desi</i>      | Ca_Desig_denovo              | 6251327                        | (A/G)       |
| 38860       | CadSNP14455    | <i>Desi</i>      | Ca_Desig_denovo              | 6295032                        | (G/A)       |
| 38861       | CadSNP14456    | <i>Desi</i>      | Ca_Desig_denovo              | 6295035                        | (C/T)       |
| 38862       | CadSNP14457    | <i>Desi</i>      | Ca_Desig_denovo              | 6325219                        | (A/G)       |
| 38863       | CadSNP14458    | <i>Desi</i>      | Ca_Desig_denovo              | 6325226                        | (A/C)       |
| 38864       | CadSNP14459    | <i>Desi</i>      | Ca_Desig_denovo              | 6325255                        | (A/C)       |
| 38865       | CadSNP14460    | <i>Desi</i>      | Ca_Desig_denovo              | 6369540                        | (C/A)       |
| 38866       | CadSNP14461    | <i>Desi</i>      | Ca_Desig_denovo              | 6561359                        | (T/G)       |
| 38867       | CadSNP14462    | <i>Desi</i>      | Ca_Desig_denovo              | 6567313                        | (C/T)       |
| 38868       | CadSNP14463    | <i>Desi</i>      | Ca_Desig_denovo              | 6567899                        | (A/C)       |
| 38869       | CadSNP14464    | <i>Desi</i>      | Ca_Desig_denovo              | 6582026                        | (C/T)       |
| 38870       | CadSNP14465    | <i>Desi</i>      | Ca_Desig_denovo              | 6597730                        | (G/A)       |
| 38871       | CadSNP14466    | <i>Desi</i>      | Ca_Desig_denovo              | 6603378                        | (G/A)       |
| 38872       | CadSNP14467    | <i>Desi</i>      | Ca_Desig_denovo              | 6676961                        | (G/A)       |
| 38873       | CadSNP14468    | <i>Desi</i>      | Ca_Desig_denovo              | 6697501                        | (C/G)       |

| <b>S.N.</b> | <b>SNP IDs</b> | <b>Cultivars</b> | <b>Chromosomes/scaffolds</b> | <b>Physical positions (bp)</b> | <b>SNPs</b> |
|-------------|----------------|------------------|------------------------------|--------------------------------|-------------|
| 38874       | CadSNP14469    | <i>Desi</i>      | Ca_Desig_denovo              | 6703661                        | (C/T)       |
| 38875       | CadSNP14470    | <i>Desi</i>      | Ca_Desig_denovo              | 6796639                        | (G/C)       |
| 38876       | CadSNP14471    | <i>Desi</i>      | Ca_Desig_denovo              | 6796647                        | (A/G)       |
| 38877       | CadSNP14472    | <i>Desi</i>      | Ca_Desig_denovo              | 6803518                        | (C/T)       |
| 38878       | CadSNP14473    | <i>Desi</i>      | Ca_Desig_denovo              | 6803521                        | (G/T)       |
| 38879       | CadSNP14474    | <i>Desi</i>      | Ca_Desig_denovo              | 6803536                        | (G/T)       |
| 38880       | CadSNP14475    | <i>Desi</i>      | Ca_Desig_denovo              | 6803540                        | (T/A)       |
| 38881       | CadSNP14476    | <i>Desi</i>      | Ca_Desig_denovo              | 6811456                        | (C/T)       |
| 38882       | CadSNP14477    | <i>Desi</i>      | Ca_Desig_denovo              | 6811468                        | (G/A)       |
| 38883       | CadSNP14478    | <i>Desi</i>      | Ca_Desig_denovo              | 6811478                        | (A/G)       |
| 38884       | CadSNP14479    | <i>Desi</i>      | Ca_Desig_denovo              | 6816820                        | (T/C)       |
| 38885       | CadSNP14480    | <i>Desi</i>      | Ca_Desig_denovo              | 6833173                        | (A/C)       |
| 38886       | CadSNP14481    | <i>Desi</i>      | Ca_Desig_denovo              | 6835538                        | (T/G)       |
| 38887       | CadSNP14482    | <i>Desi</i>      | Ca_Desig_denovo              | 6846879                        | (T/A)       |
| 38888       | CadSNP14483    | <i>Desi</i>      | Ca_Desig_denovo              | 6899221                        | (C/T)       |
| 38889       | CadSNP14484    | <i>Desi</i>      | Ca_Desig_denovo              | 6900343                        | (A/G)       |
| 38890       | CadSNP14485    | <i>Desi</i>      | Ca_Desig_denovo              | 6917572                        | (T/C)       |
| 38891       | CadSNP14486    | <i>Desi</i>      | Ca_Desig_denovo              | 6933808                        | (T/G)       |
| 38892       | CadSNP14487    | <i>Desi</i>      | Ca_Desig_denovo              | 6933814                        | (G/C)       |
| 38893       | CadSNP14488    | <i>Desi</i>      | Ca_Desig_denovo              | 6942583                        | (G/C)       |
| 38894       | CadSNP14489    | <i>Desi</i>      | Ca_Desig_denovo              | 6965339                        | (G/C)       |
| 38895       | CadSNP14490    | <i>Desi</i>      | Ca_Desig_denovo              | 6965406                        | (C/T)       |
| 38896       | CadSNP14491    | <i>Desi</i>      | Ca_Desig_denovo              | 6965419                        | (A/C)       |
| 38897       | CadSNP14492    | <i>Desi</i>      | Ca_Desig_denovo              | 6974849                        | (G/A)       |
| 38898       | CadSNP14493    | <i>Desi</i>      | Ca_Desig_denovo              | 6974851                        | (T/C)       |
| 38899       | CadSNP14494    | <i>Desi</i>      | Ca_Desig_denovo              | 6980062                        | (A/G)       |
| 38900       | CadSNP14495    | <i>Desi</i>      | Ca_Desig_denovo              | 6980083                        | (C/G)       |
| 38901       | CadSNP14496    | <i>Desi</i>      | Ca_Desig_denovo              | 6986447                        | (G/A)       |
| 38902       | CadSNP14497    | <i>Desi</i>      | Ca_Desig_denovo              | 6986471                        | (C/T)       |
| 38903       | CadSNP14498    | <i>Desi</i>      | Ca_Desig_denovo              | 7038125                        | (C/G)       |
| 38904       | CadSNP14499    | <i>Desi</i>      | Ca_Desig_denovo              | 7038131                        | (G/A)       |
| 38905       | CadSNP14500    | <i>Desi</i>      | Ca_Desig_denovo              | 7081042                        | (A/G)       |
| 38906       | CadSNP14501    | <i>Desi</i>      | Ca_Desig_denovo              | 7081969                        | (T/C)       |
| 38907       | CadSNP14502    | <i>Desi</i>      | Ca_Desig_denovo              | 7086830                        | (C/G)       |
| 38908       | CadSNP14503    | <i>Desi</i>      | Ca_Desig_denovo              | 7086832                        | (G/C)       |
| 38909       | CadSNP14504    | <i>Desi</i>      | Ca_Desig_denovo              | 7086835                        | (C/A)       |
| 38910       | CadSNP14505    | <i>Desi</i>      | Ca_Desig_denovo              | 7086838                        | (A/T)       |
| 38911       | CadSNP14506    | <i>Desi</i>      | Ca_Desig_denovo              | 7086843                        | (G/T)       |

| <b>S.N.</b> | <b>SNP IDs</b> | <b>Cultivars</b> | <b>Chromosomes/scaffolds</b> | <b>Physical positions (bp)</b> | <b>SNPs</b> |
|-------------|----------------|------------------|------------------------------|--------------------------------|-------------|
| 38912       | CadSNP14507    | <i>Desi</i>      | Ca_Desig_denovo              | 7086844                        | (T/G)       |
| 38913       | CadSNP14508    | <i>Desi</i>      | Ca_Desig_denovo              | 7124683                        | (A/G)       |
| 38914       | CadSNP14509    | <i>Desi</i>      | Ca_Desig_denovo              | 7124730                        | (T/C)       |
| 38915       | CadSNP14510    | <i>Desi</i>      | Ca_Desig_denovo              | 7134902                        | (G/C)       |
| 38916       | CadSNP14511    | <i>Desi</i>      | Ca_Desig_denovo              | 7134910                        | (T/C)       |
| 38917       | CadSNP14512    | <i>Desi</i>      | Ca_Desig_denovo              | 7145599                        | (G/A)       |
| 38918       | CadSNP14513    | <i>Desi</i>      | Ca_Desig_denovo              | 7176848                        | (T/G)       |
| 38919       | CadSNP14514    | <i>Desi</i>      | Ca_Desig_denovo              | 7199044                        | (C/G)       |
| 38920       | CadSNP14515    | <i>Desi</i>      | Ca_Desig_denovo              | 7220808                        | (G/A)       |
| 38921       | CadSNP14516    | <i>Desi</i>      | Ca_Desig_denovo              | 7229391                        | (T/C)       |
| 38922       | CadSNP14517    | <i>Desi</i>      | Ca_Desig_denovo              | 7229400                        | (A/G)       |
| 38923       | CadSNP14518    | <i>Desi</i>      | Ca_Desig_denovo              | 7243132                        | (T/G)       |
| 38924       | CadSNP14519    | <i>Desi</i>      | Ca_Desig_denovo              | 7246415                        | (T/C)       |
| 38925       | CadSNP14520    | <i>Desi</i>      | Ca_Desig_denovo              | 7252920                        | (G/A)       |
| 38926       | CadSNP14521    | <i>Desi</i>      | Ca_Desig_denovo              | 7281434                        | (A/C)       |
| 38927       | CadSNP14522    | <i>Desi</i>      | Ca_Desig_denovo              | 7288610                        | (A/G)       |
| 38928       | CadSNP14523    | <i>Desi</i>      | Ca_Desig_denovo              | 7300964                        | (A/C)       |
| 38929       | CadSNP14524    | <i>Desi</i>      | Ca_Desig_denovo              | 7301851                        | (A/G)       |
| 38930       | CadSNP14525    | <i>Desi</i>      | Ca_Desig_denovo              | 7353160                        | (G/T)       |
| 38931       | CadSNP14526    | <i>Desi</i>      | Ca_Desig_denovo              | 7353460                        | (A/T)       |
| 38932       | CadSNP14527    | <i>Desi</i>      | Ca_Desig_denovo              | 7353476                        | (A/T)       |
| 38933       | CadSNP14528    | <i>Desi</i>      | Ca_Desig_denovo              | 7355707                        | (A/G)       |
| 38934       | CadSNP14529    | <i>Desi</i>      | Ca_Desig_denovo              | 7383750                        | (A/G)       |
| 38935       | CadSNP14530    | <i>Desi</i>      | Ca_Desig_denovo              | 7400302                        | (G/A)       |
| 38936       | CadSNP14531    | <i>Desi</i>      | Ca_Desig_denovo              | 7400320                        | (A/T)       |
| 38937       | CadSNP14532    | <i>Desi</i>      | Ca_Desig_denovo              | 7405606                        | (A/C)       |
| 38938       | CadSNP14533    | <i>Desi</i>      | Ca_Desig_denovo              | 7405664                        | (C/G)       |
| 38939       | CadSNP14534    | <i>Desi</i>      | Ca_Desig_denovo              | 7405665                        | (A/G)       |
| 38940       | CadSNP14535    | <i>Desi</i>      | Ca_Desig_denovo              | 7437331                        | (C/G)       |
| 38941       | CadSNP14536    | <i>Desi</i>      | Ca_Desig_denovo              | 7437332                        | (T/A)       |
| 38942       | CadSNP14537    | <i>Desi</i>      | Ca_Desig_denovo              | 7437343                        | (C/T)       |
| 38943       | CadSNP14538    | <i>Desi</i>      | Ca_Desig_denovo              | 7437345                        | (T/C)       |
| 38944       | CadSNP14539    | <i>Desi</i>      | Ca_Desig_denovo              | 7444900                        | (A/T)       |
| 38945       | CadSNP14540    | <i>Desi</i>      | Ca_Desig_denovo              | 7450814                        | (A/G)       |
| 38946       | CadSNP14541    | <i>Desi</i>      | Ca_Desig_denovo              | 7460196                        | (A/G)       |
| 38947       | CadSNP14542    | <i>Desi</i>      | Ca_Desig_denovo              | 7460197                        | (T/A)       |
| 38948       | CadSNP14543    | <i>Desi</i>      | Ca_Desig_denovo              | 7460239                        | (T/C)       |
| 38949       | CadSNP14544    | <i>Desi</i>      | Ca_Desig_denovo              | 7460660                        | (T/C)       |

| <b>S.N.</b> | <b>SNP IDs</b> | <b>Cultivars</b> | <b>Chromosomes/scaffolds</b> | <b>Physical positions (bp)</b> | <b>SNPs</b> |
|-------------|----------------|------------------|------------------------------|--------------------------------|-------------|
| 38950       | CadSNP14545    | <i>Desi</i>      | Ca_Desig_denovo              | 7460678                        | (C/G)       |
| 38951       | CadSNP14546    | <i>Desi</i>      | Ca_Desig_denovo              | 7461227                        | (C/G)       |
| 38952       | CadSNP14547    | <i>Desi</i>      | Ca_Desig_denovo              | 7461250                        | (T/C)       |
| 38953       | CadSNP14548    | <i>Desi</i>      | Ca_Desig_denovo              | 7470367                        | (T/C)       |
| 38954       | CadSNP14549    | <i>Desi</i>      | Ca_Desig_denovo              | 7474881                        | (C/A)       |
| 38955       | CadSNP14550    | <i>Desi</i>      | Ca_Desig_denovo              | 7474900                        | (A/C)       |
| 38956       | CadSNP14551    | <i>Desi</i>      | Ca_Desig_denovo              | 7484553                        | (A/T)       |
| 38957       | CadSNP14552    | <i>Desi</i>      | Ca_Desig_denovo              | 7484556                        | (A/G)       |
| 38958       | CadSNP14553    | <i>Desi</i>      | Ca_Desig_denovo              | 7484558                        | (G/A)       |
| 38959       | CadSNP14554    | <i>Desi</i>      | Ca_Desig_denovo              | 7484570                        | (G/C)       |
| 38960       | CadSNP14555    | <i>Desi</i>      | Ca_Desig_denovo              | 7484587                        | (G/C)       |
| 38961       | CadSNP14556    | <i>Desi</i>      | Ca_Desig_denovo              | 7484592                        | (T/C)       |
| 38962       | CadSNP14557    | <i>Desi</i>      | Ca_Desig_denovo              | 7497304                        | (C/T)       |
| 38963       | CadSNP14558    | <i>Desi</i>      | Ca_Desig_denovo              | 7497316                        | (A/G)       |
| 38964       | CadSNP14559    | <i>Desi</i>      | Ca_Desig_denovo              | 7500291                        | (C/G)       |
| 38965       | CadSNP14560    | <i>Desi</i>      | Ca_Desig_denovo              | 7500336                        | (T/C)       |
| 38966       | CadSNP14561    | <i>Desi</i>      | Ca_Desig_denovo              | 7501395                        | (G/A)       |
| 38967       | CadSNP14562    | <i>Desi</i>      | Ca_Desig_denovo              | 7501405                        | (C/A)       |
| 38968       | CadSNP14563    | <i>Desi</i>      | Ca_Desig_denovo              | 7501429                        | (C/G)       |
| 38969       | CadSNP14564    | <i>Desi</i>      | Ca_Desig_denovo              | 7509939                        | (T/A)       |
| 38970       | CadSNP14565    | <i>Desi</i>      | Ca_Desig_denovo              | 7509948                        | (A/G)       |
| 38971       | CadSNP14566    | <i>Desi</i>      | Ca_Desig_denovo              | 7517479                        | (T/C)       |
| 38972       | CadSNP14567    | <i>Desi</i>      | Ca_Desig_denovo              | 7517484                        | (A/G)       |
| 38973       | CadSNP14568    | <i>Desi</i>      | Ca_Desig_denovo              | 7517485                        | (T/C)       |
| 38974       | CadSNP14569    | <i>Desi</i>      | Ca_Desig_denovo              | 7517486                        | (A/C)       |
| 38975       | CadSNP14570    | <i>Desi</i>      | Ca_Desig_denovo              | 7517491                        | (G/C)       |
| 38976       | CadSNP14571    | <i>Desi</i>      | Ca_Desig_denovo              | 7517494                        | (A/T)       |
| 38977       | CadSNP14572    | <i>Desi</i>      | Ca_Desig_denovo              | 7517498                        | (T/C)       |
| 38978       | CadSNP14573    | <i>Desi</i>      | Ca_Desig_denovo              | 7517504                        | (C/T)       |
| 38979       | CadSNP14574    | <i>Desi</i>      | Ca_Desig_denovo              | 7517512                        | (C/G)       |
| 38980       | CadSNP14575    | <i>Desi</i>      | Ca_Desig_denovo              | 7517513                        | (A/G)       |
| 38981       | CadSNP14576    | <i>Desi</i>      | Ca_Desig_denovo              | 7517514                        | (G/T)       |
| 38982       | CadSNP14577    | <i>Desi</i>      | Ca_Desig_denovo              | 7533025                        | (A/T)       |
| 38983       | CadSNP14578    | <i>Desi</i>      | Ca_Desig_denovo              | 7543326                        | (A/T)       |
| 38984       | CadSNP14579    | <i>Desi</i>      | Ca_Desig_denovo              | 7568643                        | (T/C)       |
| 38985       | CadSNP14580    | <i>Desi</i>      | Ca_Desig_denovo              | 7568655                        | (G/A)       |
| 38986       | CadSNP14581    | <i>Desi</i>      | Ca_Desig_denovo              | 7569679                        | (T/A)       |
| 38987       | CadSNP14582    | <i>Desi</i>      | Ca_Desig_denovo              | 7579542                        | (T/C)       |

| <b>S.N.</b> | <b>SNP IDs</b> | <b>Cultivars</b> | <b>Chromosomes/scaffolds</b> | <b>Physical positions (bp)</b> | <b>SNPs</b> |
|-------------|----------------|------------------|------------------------------|--------------------------------|-------------|
| 38988       | CadSNP14583    | <i>Desi</i>      | Ca_Desig_denovo              | 7580265                        | (C/T)       |
| 38989       | CadSNP14584    | <i>Desi</i>      | Ca_Desig_denovo              | 7580287                        | (G/A)       |
| 38990       | CadSNP14585    | <i>Desi</i>      | Ca_Desig_denovo              | 7584060                        | (A/T)       |
| 38991       | CadSNP14586    | <i>Desi</i>      | Ca_Desig_denovo              | 7584064                        | (T/G)       |
| 38992       | CadSNP14587    | <i>Desi</i>      | Ca_Desig_denovo              | 7584066                        | (T/C)       |
| 38993       | CadSNP14588    | <i>Desi</i>      | Ca_Desig_denovo              | 7584067                        | (C/T)       |
| 38994       | CadSNP14589    | <i>Desi</i>      | Ca_Desig_denovo              | 7584420                        | (C/A)       |
| 38995       | CadSNP14590    | <i>Desi</i>      | Ca_Desig_denovo              | 7584430                        | (G/T)       |
| 38996       | CadSNP14591    | <i>Desi</i>      | Ca_Desig_denovo              | 7587312                        | (G/A)       |
| 38997       | CadSNP14592    | <i>Desi</i>      | Ca_Desig_denovo              | 7592529                        | (C/G)       |
| 38998       | CadSNP14593    | <i>Desi</i>      | Ca_Desig_denovo              | 7592536                        | (T/C)       |
| 38999       | CadSNP14594    | <i>Desi</i>      | Ca_Desig_denovo              | 7592540                        | (T/A)       |
| 39000       | CadSNP14595    | <i>Desi</i>      | Ca_Desig_denovo              | 7593231                        | (T/A)       |
| 39001       | CadSNP14596    | <i>Desi</i>      | Ca_Desig_denovo              | 7618402                        | (A/G)       |
| 39002       | CadSNP14597    | <i>Desi</i>      | Ca_Desig_denovo              | 7626487                        | (C/T)       |
| 39003       | CadSNP14598    | <i>Desi</i>      | Ca_Desig_denovo              | 7647831                        | (G/A)       |
| 39004       | CadSNP14599    | <i>Desi</i>      | Ca_Desig_denovo              | 7651678                        | (G/A)       |
| 39005       | CadSNP14600    | <i>Desi</i>      | Ca_Desig_denovo              | 7663456                        | (G/C)       |
| 39006       | CadSNP14601    | <i>Desi</i>      | Ca_Desig_denovo              | 7733249                        | (C/T)       |
| 39007       | CadSNP14602    | <i>Desi</i>      | Ca_Desig_denovo              | 7738652                        | (A/G)       |
| 39008       | CadSNP14603    | <i>Desi</i>      | Ca_Desig_denovo              | 7754914                        | (A/G)       |
| 39009       | CadSNP14604    | <i>Desi</i>      | Ca_Desig_denovo              | 7772980                        | (A/C)       |
| 39010       | CadSNP14605    | <i>Desi</i>      | Ca_Desig_denovo              | 7780748                        | (A/C)       |
| 39011       | CadSNP14606    | <i>Desi</i>      | Ca_Desig_denovo              | 7780751                        | (T/C)       |
| 39012       | CadSNP14607    | <i>Desi</i>      | Ca_Desig_denovo              | 7780752                        | (C/A)       |
| 39013       | CadSNP14608    | <i>Desi</i>      | Ca_Desig_denovo              | 7800105                        | (G/A)       |
| 39014       | CadSNP14609    | <i>Desi</i>      | Ca_Desig_denovo              | 7800136                        | (A/G)       |
| 39015       | CadSNP14610    | <i>Desi</i>      | Ca_Desig_denovo              | 7802108                        | (G/A)       |
| 39016       | CadSNP14611    | <i>Desi</i>      | Ca_Desig_denovo              | 7802452                        | (A/G)       |
| 39017       | CadSNP14612    | <i>Desi</i>      | Ca_Desig_denovo              | 7802461                        | (G/A)       |
| 39018       | CadSNP14613    | <i>Desi</i>      | Ca_Desig_denovo              | 7802505                        | (T/C)       |
| 39019       | CadSNP14614    | <i>Desi</i>      | Ca_Desig_denovo              | 7802508                        | (C/T)       |
| 39020       | CadSNP14615    | <i>Desi</i>      | Ca_Desig_denovo              | 7804861                        | (C/T)       |
| 39021       | CadSNP14616    | <i>Desi</i>      | Ca_Desig_denovo              | 7804892                        | (C/T)       |
| 39022       | CadSNP14617    | <i>Desi</i>      | Ca_Desig_denovo              | 7808194                        | (C/T)       |
| 39023       | CadSNP14618    | <i>Desi</i>      | Ca_Desig_denovo              | 7811394                        | (C/T)       |
| 39024       | CadSNP14619    | <i>Desi</i>      | Ca_Desig_denovo              | 7839653                        | (C/T)       |
| 39025       | CadSNP14620    | <i>Desi</i>      | Ca_Desig_denovo              | 7839671                        | (C/A)       |

| <b>S.N.</b> | <b>SNP IDs</b> | <b>Cultivars</b> | <b>Chromosomes/scaffolds</b> | <b>Physical positions (bp)</b> | <b>SNPs</b> |
|-------------|----------------|------------------|------------------------------|--------------------------------|-------------|
| 39026       | CadSNP14621    | <i>Desi</i>      | Ca_Desig_denovo              | 7839675                        | (A/T)       |
| 39027       | CadSNP14622    | <i>Desi</i>      | Ca_Desig_denovo              | 7883488                        | (G/A)       |
| 39028       | CadSNP14623    | <i>Desi</i>      | Ca_Desig_denovo              | 7889023                        | (G/A)       |
| 39029       | CadSNP14624    | <i>Desi</i>      | Ca_Desig_denovo              | 7895818                        | (T/C)       |
| 39030       | CadSNP14625    | <i>Desi</i>      | Ca_Desig_denovo              | 7915818                        | (C/T)       |
| 39031       | CadSNP14626    | <i>Desi</i>      | Ca_Desig_denovo              | 7925013                        | (C/G)       |
| 39032       | CadSNP14627    | <i>Desi</i>      | Ca_Desig_denovo              | 7925016                        | (G/T)       |
| 39033       | CadSNP14628    | <i>Desi</i>      | Ca_Desig_denovo              | 7925039                        | (A/G)       |
| 39034       | CadSNP14629    | <i>Desi</i>      | Ca_Desig_denovo              | 7925054                        | (G/A)       |
| 39035       | CadSNP14630    | <i>Desi</i>      | Ca_Desig_denovo              | 7925062                        | (A/G)       |
| 39036       | CadSNP14631    | <i>Desi</i>      | Ca_Desig_denovo              | 7925065                        | (C/T)       |
| 39037       | CadSNP14632    | <i>Desi</i>      | Ca_Desig_denovo              | 7925206                        | (T/A)       |
| 39038       | CadSNP14633    | <i>Desi</i>      | Ca_Desig_denovo              | 7950255                        | (G/A)       |
| 39039       | CadSNP14634    | <i>Desi</i>      | Ca_Desig_denovo              | 7952731                        | (C/G)       |
| 39040       | CadSNP14635    | <i>Desi</i>      | Ca_Desig_denovo              | 7953194                        | (T/C)       |
| 39041       | CadSNP14636    | <i>Desi</i>      | Ca_Desig_denovo              | 7953237                        | (G/T)       |
| 39042       | CadSNP14637    | <i>Desi</i>      | Ca_Desig_denovo              | 7981135                        | (C/G)       |
| 39043       | CadSNP14638    | <i>Desi</i>      | Ca_Desig_denovo              | 7995247                        | (T/A)       |
| 39044       | CadSNP14639    | <i>Desi</i>      | Ca_Desig_denovo              | 7997456                        | (C/T)       |
| 39045       | CadSNP14640    | <i>Desi</i>      | Ca_Desig_denovo              | 7997476                        | (A/T)       |
| 39046       | CadSNP14641    | <i>Desi</i>      | Ca_Desig_denovo              | 7997485                        | (A/G)       |
| 39047       | CadSNP14642    | <i>Desi</i>      | Ca_Desig_denovo              | 8007420                        | (C/T)       |
| 39048       | CadSNP14643    | <i>Desi</i>      | Ca_Desig_denovo              | 8007453                        | (A/G)       |
| 39049       | CadSNP14644    | <i>Desi</i>      | Ca_Desig_denovo              | 8028502                        | (A/C)       |
| 39050       | CadSNP14645    | <i>Desi</i>      | Ca_Desig_denovo              | 8028706                        | (A/G)       |
| 39051       | CadSNP14646    | <i>Desi</i>      | Ca_Desig_denovo              | 8028724                        | (C/T)       |
| 39052       | CadSNP14647    | <i>Desi</i>      | Ca_Desig_denovo              | 8028748                        | (G/A)       |
| 39053       | CadSNP14648    | <i>Desi</i>      | Ca_Desig_denovo              | 8032719                        | (C/T)       |
| 39054       | CadSNP14649    | <i>Desi</i>      | Ca_Desig_denovo              | 8037706                        | (T/C)       |
| 39055       | CadSNP14650    | <i>Desi</i>      | Ca_Desig_denovo              | 8039773                        | (G/A)       |
| 39056       | CadSNP14651    | <i>Desi</i>      | Ca_Desig_denovo              | 8039796                        | (G/C)       |
| 39057       | CadSNP14652    | <i>Desi</i>      | Ca_Desig_denovo              | 8040346                        | (A/C)       |
| 39058       | CadSNP14653    | <i>Desi</i>      | Ca_Desig_denovo              | 8050889                        | (C/T)       |
| 39059       | CadSNP14654    | <i>Desi</i>      | Ca_Desig_denovo              | 8050891                        | (G/A)       |
| 39060       | CadSNP14655    | <i>Desi</i>      | Ca_Desig_denovo              | 8055435                        | (T/C)       |
| 39061       | CadSNP14656    | <i>Desi</i>      | Ca_Desig_denovo              | 8056411                        | (A/G)       |
| 39062       | CadSNP14657    | <i>Desi</i>      | Ca_Desig_denovo              | 8056420                        | (G/A)       |
| 39063       | CadSNP14658    | <i>Desi</i>      | Ca_Desig_denovo              | 8060796                        | (C/T)       |

| <b>S.N.</b> | <b>SNP IDs</b> | <b>Cultivars</b> | <b>Chromosomes/scaffolds</b> | <b>Physical positions (bp)</b> | <b>SNPs</b> |
|-------------|----------------|------------------|------------------------------|--------------------------------|-------------|
| 39064       | CadSNP14659    | <i>Desi</i>      | Ca_Desig_denovo              | 8071419                        | (T/C)       |
| 39065       | CadSNP14660    | <i>Desi</i>      | Ca_Desig_denovo              | 8075957                        | (G/A)       |
| 39066       | CadSNP14661    | <i>Desi</i>      | Ca_Desig_denovo              | 8085056                        | (C/T)       |
| 39067       | CadSNP14662    | <i>Desi</i>      | Ca_Desig_denovo              | 8085134                        | (C/T)       |
| 39068       | CadSNP14663    | <i>Desi</i>      | Ca_Desig_denovo              | 8085152                        | (A/G)       |
| 39069       | CadSNP14664    | <i>Desi</i>      | Ca_Desig_denovo              | 8086308                        | (G/A)       |
| 39070       | CadSNP14665    | <i>Desi</i>      | Ca_Desig_denovo              | 8111705                        | (G/A)       |
| 39071       | CadSNP14666    | <i>Desi</i>      | Ca_Desig_denovo              | 8115086                        | (A/C)       |
| 39072       | CadSNP14667    | <i>Desi</i>      | Ca_Desig_denovo              | 8116688                        | (G/A)       |
| 39073       | CadSNP14668    | <i>Desi</i>      | Ca_Desig_denovo              | 8116753                        | (C/G)       |
| 39074       | CadSNP14669    | <i>Desi</i>      | Ca_Desig_denovo              | 8135261                        | (G/C)       |
| 39075       | CadSNP14670    | <i>Desi</i>      | Ca_Desig_denovo              | 8135267                        | (G/A)       |
| 39076       | CadSNP14671    | <i>Desi</i>      | Ca_Desig_denovo              | 8141335                        | (A/C)       |
| 39077       | CadSNP14672    | <i>Desi</i>      | Ca_Desig_denovo              | 8141360                        | (A/C)       |
| 39078       | CadSNP14673    | <i>Desi</i>      | Ca_Desig_denovo              | 8157526                        | (T/C)       |
| 39079       | CadSNP14674    | <i>Desi</i>      | Ca_Desig_denovo              | 8165347                        | (T/G)       |
| 39080       | CadSNP14675    | <i>Desi</i>      | Ca_Desig_denovo              | 8165400                        | (T/C)       |
| 39081       | CadSNP14676    | <i>Desi</i>      | Ca_Desig_denovo              | 8166367                        | (G/T)       |
| 39082       | CadSNP14677    | <i>Desi</i>      | Ca_Desig_denovo              | 8168620                        | (C/A)       |
| 39083       | CadSNP14678    | <i>Desi</i>      | Ca_Desig_denovo              | 8168855                        | (A/G)       |
| 39084       | CadSNP14679    | <i>Desi</i>      | Ca_Desig_denovo              | 8168857                        | (C/T)       |
| 39085       | CadSNP14680    | <i>Desi</i>      | Ca_Desig_denovo              | 8171510                        | (A/G)       |
| 39086       | CadSNP14681    | <i>Desi</i>      | Ca_Desig_denovo              | 8171515                        | (C/A)       |
| 39087       | CadSNP14682    | <i>Desi</i>      | Ca_Desig_denovo              | 8172781                        | (C/T)       |
| 39088       | CadSNP14683    | <i>Desi</i>      | Ca_Desig_denovo              | 8173140                        | (G/C)       |
| 39089       | CadSNP14684    | <i>Desi</i>      | Ca_Desig_denovo              | 8173153                        | (G/T)       |
| 39090       | CadSNP14685    | <i>Desi</i>      | Ca_Desig_denovo              | 8174528                        | (G/A)       |
| 39091       | CadSNP14686    | <i>Desi</i>      | Ca_Desig_denovo              | 8174578                        | (C/T)       |
| 39092       | CadSNP14687    | <i>Desi</i>      | Ca_Desig_denovo              | 8176483                        | (C/A)       |
| 39093       | CadSNP14688    | <i>Desi</i>      | Ca_Desig_denovo              | 8176497                        | (C/G)       |
| 39094       | CadSNP14689    | <i>Desi</i>      | Ca_Desig_denovo              | 8176958                        | (A/G)       |
| 39095       | CadSNP14690    | <i>Desi</i>      | Ca_Desig_denovo              | 8185604                        | (C/T)       |
| 39096       | CadSNP14691    | <i>Desi</i>      | Ca_Desig_denovo              | 8185618                        | (A/G)       |
| 39097       | CadSNP14692    | <i>Desi</i>      | Ca_Desig_denovo              | 8195181                        | (C/G)       |
| 39098       | CadSNP14693    | <i>Desi</i>      | Ca_Desig_denovo              | 8195197                        | (T/C)       |
| 39099       | CadSNP14694    | <i>Desi</i>      | Ca_Desig_denovo              | 8195230                        | (G/C)       |
| 39100       | CadSNP14695    | <i>Desi</i>      | Ca_Desig_denovo              | 8196194                        | (A/G)       |
| 39101       | CadSNP14696    | <i>Desi</i>      | Ca_Desig_denovo              | 8196263                        | (A/G)       |

| <b>S.N.</b> | <b>SNP IDs</b> | <b>Cultivars</b> | <b>Chromosomes/scaffolds</b> | <b>Physical positions (bp)</b> | <b>SNPs</b> |
|-------------|----------------|------------------|------------------------------|--------------------------------|-------------|
| 39102       | CadSNP14697    | <i>Desi</i>      | Ca_Desig_denovo              | 8196319                        | (C/G)       |
| 39103       | CadSNP14698    | <i>Desi</i>      | Ca_Desig_denovo              | 8202949                        | (C/T)       |
| 39104       | CadSNP14699    | <i>Desi</i>      | Ca_Desig_denovo              | 8211649                        | (C/A)       |
| 39105       | CadSNP14700    | <i>Desi</i>      | Ca_Desig_denovo              | 8211690                        | (C/G)       |
| 39106       | CadSNP14701    | <i>Desi</i>      | Ca_Desig_denovo              | 8212216                        | (G/C)       |
| 39107       | CadSNP14702    | <i>Desi</i>      | Ca_Desig_denovo              | 8212229                        | (G/C)       |
| 39108       | CadSNP14703    | <i>Desi</i>      | Ca_Desig_denovo              | 8222084                        | (C/G)       |
| 39109       | CadSNP14704    | <i>Desi</i>      | Ca_Desig_denovo              | 8222094                        | (G/C)       |
| 39110       | CadSNP14705    | <i>Desi</i>      | Ca_Desig_denovo              | 8222885                        | (T/G)       |
| 39111       | CadSNP14706    | <i>Desi</i>      | Ca_Desig_denovo              | 8223070                        | (T/G)       |
| 39112       | CadSNP14707    | <i>Desi</i>      | Ca_Desig_denovo              | 8223128                        | (G/C)       |
| 39113       | CadSNP14708    | <i>Desi</i>      | Ca_Desig_denovo              | 8231231                        | (T/C)       |
| 39114       | CadSNP14709    | <i>Desi</i>      | Ca_Desig_denovo              | 8237123                        | (G/A)       |
| 39115       | CadSNP14710    | <i>Desi</i>      | Ca_Desig_denovo              | 8243313                        | (G/T)       |
| 39116       | CadSNP14711    | <i>Desi</i>      | Ca_Desig_denovo              | 8245787                        | (C/T)       |
| 39117       | CadSNP14712    | <i>Desi</i>      | Ca_Desig_denovo              | 8247527                        | (G/C)       |
| 39118       | CadSNP14713    | <i>Desi</i>      | Ca_Desig_denovo              | 8247531                        | (G/A)       |
| 39119       | CadSNP14714    | <i>Desi</i>      | Ca_Desig_denovo              | 8249564                        | (A/G)       |
| 39120       | CadSNP14715    | <i>Desi</i>      | Ca_Desig_denovo              | 8251646                        | (A/T)       |
| 39121       | CadSNP14716    | <i>Desi</i>      | Ca_Desig_denovo              | 8258455                        | (G/A)       |
| 39122       | CadSNP14717    | <i>Desi</i>      | Ca_Desig_denovo              | 8261761                        | (C/A)       |
| 39123       | CadSNP14718    | <i>Desi</i>      | Ca_Desig_denovo              | 8266723                        | (C/A)       |
| 39124       | CadSNP14719    | <i>Desi</i>      | Ca_Desig_denovo              | 8266732                        | (G/C)       |
| 39125       | CadSNP14720    | <i>Desi</i>      | Ca_Desig_denovo              | 8266984                        | (C/G)       |
| 39126       | CadSNP14721    | <i>Desi</i>      | Ca_Desig_denovo              | 8267017                        | (A/G)       |
| 39127       | CadSNP14722    | <i>Desi</i>      | Ca_Desig_denovo              | 8272196                        | (A/G)       |
| 39128       | CadSNP14723    | <i>Desi</i>      | Ca_Desig_denovo              | 8272197                        | (A/G)       |
| 39129       | CadSNP14724    | <i>Desi</i>      | Ca_Desig_denovo              | 8274603                        | (T/C)       |
| 39130       | CadSNP14725    | <i>Desi</i>      | Ca_Desig_denovo              | 8274993                        | (G/A)       |
| 39131       | CadSNP14726    | <i>Desi</i>      | Ca_Desig_denovo              | 8275014                        | (C/G)       |
| 39132       | CadSNP14727    | <i>Desi</i>      | Ca_Desig_denovo              | 8276915                        | (C/T)       |
| 39133       | CadSNP14728    | <i>Desi</i>      | Ca_Desig_denovo              | 8286061                        | (T/C)       |
| 39134       | CadSNP14729    | <i>Desi</i>      | Ca_Desig_denovo              | 8292741                        | (C/G)       |
| 39135       | CadSNP14730    | <i>Desi</i>      | Ca_Desig_denovo              | 8292776                        | (A/C)       |
| 39136       | CadSNP14731    | <i>Desi</i>      | Ca_Desig_denovo              | 8298046                        | (C/T)       |
| 39137       | CadSNP14732    | <i>Desi</i>      | Ca_Desig_denovo              | 8298561                        | (T/G)       |
| 39138       | CadSNP14733    | <i>Desi</i>      | Ca_Desig_denovo              | 8309580                        | (G/A)       |
| 39139       | CadSNP14734    | <i>Desi</i>      | Ca_Desig_denovo              | 8310657                        | (C/G)       |



| <b>S.N.</b> | <b>SNP IDs</b> | <b>Cultivars</b> | <b>Chromosomes/scaffolds</b> | <b>Physical positions (bp)</b> | <b>SNPs</b> |
|-------------|----------------|------------------|------------------------------|--------------------------------|-------------|
| 39140       | CadSNP14735    | <i>Desi</i>      | Ca_Desig_denovo              | 8310666                        | (G/A)       |
| 39141       | CadSNP14736    | <i>Desi</i>      | Ca_Desig_denovo              | 8312819                        | (C/A)       |
| 39142       | CadSNP14737    | <i>Desi</i>      | Ca_Desig_denovo              | 8312846                        | (C/G)       |
| 39143       | CadSNP14738    | <i>Desi</i>      | Ca_Desig_denovo              | 8323155                        | (C/T)       |
| 39144       | CadSNP14739    | <i>Desi</i>      | Ca_Desig_denovo              | 8323192                        | (T/A)       |
| 39145       | CadSNP14740    | <i>Desi</i>      | Ca_Desig_denovo              | 8324569                        | (G/T)       |
| 39146       | CadSNP14741    | <i>Desi</i>      | Ca_Desig_denovo              | 8327867                        | (A/C)       |
| 39147       | CadSNP14742    | <i>Desi</i>      | Ca_Desig_denovo              | 8327868                        | (G/C)       |
| 39148       | CadSNP14743    | <i>Desi</i>      | Ca_Desig_denovo              | 8327908                        | (T/C)       |
| 39149       | CadSNP14744    | <i>Desi</i>      | Ca_Desig_denovo              | 8329463                        | (T/C)       |
| 39150       | CadSNP14745    | <i>Desi</i>      | Ca_Desig_denovo              | 8329924                        | (A/G)       |
| 39151       | CadSNP14746    | <i>Desi</i>      | Ca_Desig_denovo              | 8329954                        | (C/T)       |
| 39152       | CadSNP14747    | <i>Desi</i>      | Ca_Desig_denovo              | 8333371                        | (A/G)       |
| 39153       | CadSNP14748    | <i>Desi</i>      | Ca_Desig_denovo              | 8333374                        | (G/C)       |
| 39154       | CadSNP14749    | <i>Desi</i>      | Ca_Desig_denovo              | 8336104                        | (T/G)       |
| 39155       | CadSNP14750    | <i>Desi</i>      | Ca_Desig_denovo              | 8339702                        | (G/A)       |
| 39156       | CadSNP14751    | <i>Desi</i>      | Ca_Desig_denovo              | 8341525                        | (T/G)       |
| 39157       | CadSNP14752    | <i>Desi</i>      | Ca_Desig_denovo              | 8342737                        | (A/G)       |
| 39158       | CadSNP14753    | <i>Desi</i>      | Ca_Desig_denovo              | 8348060                        | (A/G)       |
| 39159       | CadSNP14754    | <i>Desi</i>      | Ca_Desig_denovo              | 8350410                        | (C/G)       |
| 39160       | CadSNP14755    | <i>Desi</i>      | Ca_Desig_denovo              | 8351314                        | (G/A)       |
| 39161       | CadSNP14756    | <i>Desi</i>      | Ca_Desig_denovo              | 8351368                        | (T/C)       |
| 39162       | CadSNP14757    | <i>Desi</i>      | Ca_Desig_denovo              | 8354569                        | (A/G)       |
| 39163       | CadSNP14758    | <i>Desi</i>      | Ca_Desig_denovo              | 8366746                        | (A/C)       |
| 39164       | CadSNP14759    | <i>Desi</i>      | Ca_Desig_denovo              | 8375409                        | (A/G)       |
| 39165       | CadSNP14760    | <i>Desi</i>      | Ca_Desig_denovo              | 8377178                        | (T/C)       |
| 39166       | CadSNP14761    | <i>Desi</i>      | Ca_Desig_denovo              | 8381459                        | (C/A)       |
| 39167       | CadSNP14762    | <i>Desi</i>      | Ca_Desig_denovo              | 8381498                        | (C/A)       |
| 39168       | CadSNP14763    | <i>Desi</i>      | Ca_Desig_denovo              | 8382146                        | (T/C)       |
| 39169       | CadSNP14764    | <i>Desi</i>      | Ca_Desig_denovo              | 8382179                        | (A/G)       |
| 39170       | CadSNP14765    | <i>Desi</i>      | Ca_Desig_denovo              | 8388239                        | (C/T)       |
| 39171       | CadSNP14766    | <i>Desi</i>      | Ca_Desig_denovo              | 8388254                        | (A/G)       |
| 39172       | CadSNP14767    | <i>Desi</i>      | Ca_Desig_denovo              | 8392087                        | (C/T)       |
| 39173       | CadSNP14768    | <i>Desi</i>      | Ca_Desig_denovo              | 8392113                        | (C/A)       |
| 39174       | CadSNP14769    | <i>Desi</i>      | Ca_Desig_denovo              | 8404779                        | (A/G)       |
| 39175       | CadSNP14770    | <i>Desi</i>      | Ca_Desig_denovo              | 8412352                        | (T/C)       |
| 39176       | CadSNP14771    | <i>Desi</i>      | Ca_Desig_denovo              | 8412897                        | (C/G)       |
| 39177       | CadSNP14772    | <i>Desi</i>      | Ca_Desig_denovo              | 8414029                        | (T/C)       |

| <b>S.N.</b> | <b>SNP IDs</b> | <b>Cultivars</b> | <b>Chromosomes/scaffolds</b> | <b>Physical positions (bp)</b> | <b>SNPs</b> |
|-------------|----------------|------------------|------------------------------|--------------------------------|-------------|
| 39178       | CadSNP14773    | <i>Desi</i>      | Ca_Desig_denovo              | 8449753                        | (T/C)       |
| 39179       | CadSNP14774    | <i>Desi</i>      | Ca_Desig_denovo              | 8451396                        | (T/C)       |
| 39180       | CadSNP14775    | <i>Desi</i>      | Ca_Desig_denovo              | 8452515                        | (C/G)       |
| 39181       | CadSNP14776    | <i>Desi</i>      | Ca_Desig_denovo              | 8452562                        | (C/G)       |
| 39182       | CadSNP14777    | <i>Desi</i>      | Ca_Desig_denovo              | 8455858                        | (G/A)       |
| 39183       | CadSNP14778    | <i>Desi</i>      | Ca_Desig_denovo              | 8455861                        | (G/C)       |
| 39184       | CadSNP14779    | <i>Desi</i>      | Ca_Desig_denovo              | 8457077                        | (C/T)       |
| 39185       | CadSNP14780    | <i>Desi</i>      | Ca_Desig_denovo              | 8458452                        | (A/G)       |
| 39186       | CadSNP14781    | <i>Desi</i>      | Ca_Desig_denovo              | 8472895                        | (G/A)       |
| 39187       | CadSNP14782    | <i>Desi</i>      | Ca_Desig_denovo              | 8475461                        | (A/C)       |
| 39188       | CadSNP14783    | <i>Desi</i>      | Ca_Desig_denovo              | 8488757                        | (A/C)       |
| 39189       | CadSNP14784    | <i>Desi</i>      | Ca_Desig_denovo              | 8488758                        | (G/A)       |
| 39190       | CadSNP14785    | <i>Desi</i>      | Ca_Desig_denovo              | 8488761                        | (C/T)       |
| 39191       | CadSNP14786    | <i>Desi</i>      | Ca_Desig_denovo              | 8488972                        | (T/C)       |
| 39192       | CadSNP14787    | <i>Desi</i>      | Ca_Desig_denovo              | 8491101                        | (C/T)       |
| 39193       | CadSNP14788    | <i>Desi</i>      | Ca_Desig_denovo              | 8491104                        | (G/C)       |
| 39194       | CadSNP14789    | <i>Desi</i>      | Ca_Desig_denovo              | 8495192                        | (G/A)       |
| 39195       | CadSNP14790    | <i>Desi</i>      | Ca_Desig_denovo              | 8495838                        | (G/A)       |
| 39196       | CadSNP14791    | <i>Desi</i>      | Ca_Desig_denovo              | 8496665                        | (A/C)       |
| 39197       | CadSNP14792    | <i>Desi</i>      | Ca_Desig_denovo              | 8502451                        | (A/G)       |
| 39198       | CadSNP14793    | <i>Desi</i>      | Ca_Desig_denovo              | 8502525                        | (G/A)       |
| 39199       | CadSNP14794    | <i>Desi</i>      | Ca_Desig_denovo              | 8504322                        | (G/A)       |
| 39200       | CadSNP14795    | <i>Desi</i>      | Ca_Desig_denovo              | 8506012                        | (A/C)       |
| 39201       | CadSNP14796    | <i>Desi</i>      | Ca_Desig_denovo              | 8507042                        | (G/A)       |
| 39202       | CadSNP14797    | <i>Desi</i>      | Ca_Desig_denovo              | 8507069                        | (C/T)       |
| 39203       | CadSNP14798    | <i>Desi</i>      | Ca_Desig_denovo              | 8518106                        | (G/C)       |
| 39204       | CadSNP14799    | <i>Desi</i>      | Ca_Desig_denovo              | 8521203                        | (G/A)       |
| 39205       | CadSNP14800    | <i>Desi</i>      | Ca_Desig_denovo              | 8522645                        | (C/T)       |
| 39206       | CadSNP14801    | <i>Desi</i>      | Ca_Desig_denovo              | 8523209                        | (T/C)       |
| 39207       | CadSNP14802    | <i>Desi</i>      | Ca_Desig_denovo              | 8524994                        | (C/G)       |
| 39208       | CadSNP14803    | <i>Desi</i>      | Ca_Desig_denovo              | 8529243                        | (A/G)       |
| 39209       | CadSNP14804    | <i>Desi</i>      | Ca_Desig_denovo              | 8533517                        | (C/A)       |
| 39210       | CadSNP14805    | <i>Desi</i>      | Ca_Desig_denovo              | 8533539                        | (G/C)       |
| 39211       | CadSNP14806    | <i>Desi</i>      | Ca_Desig_denovo              | 8537565                        | (G/A)       |
| 39212       | CadSNP14807    | <i>Desi</i>      | Ca_Desig_denovo              | 8538394                        | (G/C)       |
| 39213       | CadSNP14808    | <i>Desi</i>      | Ca_Desig_denovo              | 8554699                        | (G/C)       |
| 39214       | CadSNP14809    | <i>Desi</i>      | Ca_Desig_denovo              | 8561002                        | (G/C)       |
| 39215       | CadSNP14810    | <i>Desi</i>      | Ca_Desig_denovo              | 8579381                        | (T/G)       |

| <b>S.N.</b> | <b>SNP IDs</b> | <b>Cultivars</b> | <b>Chromosomes/scaffolds</b> | <b>Physical positions (bp)</b> | <b>SNPs</b> |
|-------------|----------------|------------------|------------------------------|--------------------------------|-------------|
| 39216       | CadSNP14811    | <i>Desi</i>      | Ca_Desig_denovo              | 8580127                        | (C/T)       |
| 39217       | CadSNP14812    | <i>Desi</i>      | Ca_Desig_denovo              | 8580206                        | (A/G)       |
| 39218       | CadSNP14813    | <i>Desi</i>      | Ca_Desig_denovo              | 8581217                        | (G/C)       |
| 39219       | CadSNP14814    | <i>Desi</i>      | Ca_Desig_denovo              | 8581270                        | (C/G)       |
| 39220       | CadSNP14815    | <i>Desi</i>      | Ca_Desig_denovo              | 8585127                        | (A/T)       |
| 39221       | CadSNP14816    | <i>Desi</i>      | Ca_Desig_denovo              | 8585130                        | (T/C)       |
| 39222       | CadSNP14817    | <i>Desi</i>      | Ca_Desig_denovo              | 8585145                        | (G/A)       |
| 39223       | CadSNP14818    | <i>Desi</i>      | Ca_Desig_denovo              | 8586610                        | (A/C)       |
| 39224       | CadSNP14819    | <i>Desi</i>      | Ca_Desig_denovo              | 8586979                        | (T/C)       |
| 39225       | CadSNP14820    | <i>Desi</i>      | Ca_Desig_denovo              | 8589325                        | (T/G)       |
| 39226       | CadSNP14821    | <i>Desi</i>      | Ca_Desig_denovo              | 8589351                        | (A/G)       |
| 39227       | CadSNP14822    | <i>Desi</i>      | Ca_Desig_denovo              | 8591014                        | (T/C)       |
| 39228       | CadSNP14823    | <i>Desi</i>      | Ca_Desig_denovo              | 8593417                        | (T/C)       |
| 39229       | CadSNP14824    | <i>Desi</i>      | Ca_Desig_denovo              | 8593426                        | (A/G)       |
| 39230       | CadSNP14825    | <i>Desi</i>      | Ca_Desig_denovo              | 8594755                        | (A/G)       |
| 39231       | CadSNP14826    | <i>Desi</i>      | Ca_Desig_denovo              | 8595917                        | (A/G)       |
| 39232       | CadSNP14827    | <i>Desi</i>      | Ca_Desig_denovo              | 8595977                        | (G/A)       |
| 39233       | CadSNP14828    | <i>Desi</i>      | Ca_Desig_denovo              | 8598806                        | (G/T)       |
| 39234       | CadSNP14829    | <i>Desi</i>      | Ca_Desig_denovo              | 8598830                        | (C/G)       |
| 39235       | CadSNP14830    | <i>Desi</i>      | Ca_Desig_denovo              | 8602896                        | (G/A)       |
| 39236       | CadSNP14831    | <i>Desi</i>      | Ca_Desig_denovo              | 8602946                        | (G/A)       |
| 39237       | CadSNP14832    | <i>Desi</i>      | Ca_Desig_denovo              | 8609766                        | (A/G)       |
| 39238       | CadSNP14833    | <i>Desi</i>      | Ca_Desig_denovo              | 8609842                        | (G/A)       |
| 39239       | CadSNP14834    | <i>Desi</i>      | Ca_Desig_denovo              | 8612852                        | (T/C)       |
| 39240       | CadSNP14835    | <i>Desi</i>      | Ca_Desig_denovo              | 8614566                        | (C/G)       |
| 39241       | CadSNP14836    | <i>Desi</i>      | Ca_Desig_denovo              | 8616466                        | (T/G)       |
| 39242       | CadSNP14837    | <i>Desi</i>      | Ca_Desig_denovo              | 8616479                        | (C/T)       |
| 39243       | CadSNP14838    | <i>Desi</i>      | Ca_Desig_denovo              | 8616926                        | (A/T)       |
| 39244       | CadSNP14839    | <i>Desi</i>      | Ca_Desig_denovo              | 8616977                        | (T/A)       |
| 39245       | CadSNP14840    | <i>Desi</i>      | Ca_Desig_denovo              | 8617898                        | (A/G)       |
| 39246       | CadSNP14841    | <i>Desi</i>      | Ca_Desig_denovo              | 8617910                        | (A/G)       |
| 39247       | CadSNP14842    | <i>Desi</i>      | Ca_Desig_denovo              | 8617916                        | (G/A)       |
| 39248       | CadSNP14843    | <i>Desi</i>      | Ca_Desig_denovo              | 8626075                        | (G/T)       |
| 39249       | CadSNP14844    | <i>Desi</i>      | Ca_Desig_denovo              | 8633126                        | (G/C)       |
| 39250       | CadSNP14845    | <i>Desi</i>      | Ca_Desig_denovo              | 8639576                        | (C/T)       |
| 39251       | CadSNP14846    | <i>Desi</i>      | Ca_Desig_denovo              | 8639590                        | (C/T)       |
| 39252       | CadSNP14847    | <i>Desi</i>      | Ca_Desig_denovo              | 8641322                        | (A/G)       |
| 39253       | CadSNP14848    | <i>Desi</i>      | Ca_Desig_denovo              | 8641346                        | (A/G)       |

| <b>S.N.</b> | <b>SNP IDs</b> | <b>Cultivars</b> | <b>Chromosomes/scaffolds</b> | <b>Physical positions (bp)</b> | <b>SNPs</b> |
|-------------|----------------|------------------|------------------------------|--------------------------------|-------------|
| 39254       | CadSNP14849    | <i>Desi</i>      | Ca_Desig_denovo              | 8642103                        | (A/G)       |
| 39255       | CadSNP14850    | <i>Desi</i>      | Ca_Desig_denovo              | 8643241                        | (C/T)       |
| 39256       | CadSNP14851    | <i>Desi</i>      | Ca_Desig_denovo              | 8643246                        | (G/A)       |
| 39257       | CadSNP14852    | <i>Desi</i>      | Ca_Desig_denovo              | 8652206                        | (C/G)       |
| 39258       | CadSNP14853    | <i>Desi</i>      | Ca_Desig_denovo              | 8654498                        | (G/C)       |
| 39259       | CadSNP14854    | <i>Desi</i>      | Ca_Desig_denovo              | 8663695                        | (A/C)       |
| 39260       | CadSNP14855    | <i>Desi</i>      | Ca_Desig_denovo              | 8667566                        | (T/C)       |
| 39261       | CadSNP14856    | <i>Desi</i>      | Ca_Desig_denovo              | 8667572                        | (C/T)       |
| 39262       | CadSNP14857    | <i>Desi</i>      | Ca_Desig_denovo              | 8672244                        | (T/G)       |
| 39263       | CadSNP14858    | <i>Desi</i>      | Ca_Desig_denovo              | 8674238                        | (T/C)       |
| 39264       | CadSNP14859    | <i>Desi</i>      | Ca_Desig_denovo              | 8674344                        | (A/C)       |
| 39265       | CadSNP14860    | <i>Desi</i>      | Ca_Desig_denovo              | 8675010                        | (G/C)       |
| 39266       | CadSNP14861    | <i>Desi</i>      | Ca_Desig_denovo              | 8677179                        | (A/C)       |
| 39267       | CadSNP14862    | <i>Desi</i>      | Ca_Desig_denovo              | 8677180                        | (G/A)       |
| 39268       | CadSNP14863    | <i>Desi</i>      | Ca_Desig_denovo              | 8679932                        | (A/G)       |
| 39269       | CadSNP14864    | <i>Desi</i>      | Ca_Desig_denovo              | 8688010                        | (G/T)       |
| 39270       | CadSNP14865    | <i>Desi</i>      | Ca_Desig_denovo              | 8688544                        | (C/T)       |
| 39271       | CadSNP14866    | <i>Desi</i>      | Ca_Desig_denovo              | 8688550                        | (A/G)       |
| 39272       | CadSNP14867    | <i>Desi</i>      | Ca_Desig_denovo              | 8691346                        | (C/G)       |
| 39273       | CadSNP14868    | <i>Desi</i>      | Ca_Desig_denovo              | 8691382                        | (C/T)       |
| 39274       | CadSNP14869    | <i>Desi</i>      | Ca_Desig_denovo              | 8700739                        | (T/A)       |
| 39275       | CadSNP14870    | <i>Desi</i>      | Ca_Desig_denovo              | 8701325                        | (C/T)       |
| 39276       | CadSNP14871    | <i>Desi</i>      | Ca_Desig_denovo              | 8703590                        | (A/C)       |
| 39277       | CadSNP14872    | <i>Desi</i>      | Ca_Desig_denovo              | 8703677                        | (T/C)       |
| 39278       | CadSNP14873    | <i>Desi</i>      | Ca_Desig_denovo              | 8704160                        | (A/G)       |
| 39279       | CadSNP14874    | <i>Desi</i>      | Ca_Desig_denovo              | 8710507                        | (G/T)       |
| 39280       | CadSNP14875    | <i>Desi</i>      | Ca_Desig_denovo              | 8710525                        | (C/A)       |
| 39281       | CadSNP14876    | <i>Desi</i>      | Ca_Desig_denovo              | 8721551                        | (G/A)       |
| 39282       | CadSNP14877    | <i>Desi</i>      | Ca_Desig_denovo              | 8723152                        | (C/T)       |
| 39283       | CadSNP14878    | <i>Desi</i>      | Ca_Desig_denovo              | 8724084                        | (G/C)       |
| 39284       | CadSNP14879    | <i>Desi</i>      | Ca_Desig_denovo              | 8724095                        | (C/T)       |
| 39285       | CadSNP14880    | <i>Desi</i>      | Ca_Desig_denovo              | 8728989                        | (C/T)       |
| 39286       | CadSNP14881    | <i>Desi</i>      | Ca_Desig_denovo              | 8729025                        | (G/C)       |
| 39287       | CadSNP14882    | <i>Desi</i>      | Ca_Desig_denovo              | 8731319                        | (T/C)       |
| 39288       | CadSNP14883    | <i>Desi</i>      | Ca_Desig_denovo              | 8731337                        | (G/C)       |
| 39289       | CadSNP14884    | <i>Desi</i>      | Ca_Desig_denovo              | 8732148                        | (A/G)       |
| 39290       | CadSNP14885    | <i>Desi</i>      | Ca_Desig_denovo              | 8732181                        | (G/A)       |
| 39291       | CadSNP14886    | <i>Desi</i>      | Ca_Desig_denovo              | 8732350                        | (T/C)       |

| <b>S.N.</b> | <b>SNP IDs</b> | <b>Cultivars</b> | <b>Chromosomes/scaffolds</b> | <b>Physical positions (bp)</b> | <b>SNPs</b> |
|-------------|----------------|------------------|------------------------------|--------------------------------|-------------|
| 39292       | CadSNP14887    | <i>Desi</i>      | Ca_Desig_denovo              | 8732380                        | (A/T)       |
| 39293       | CadSNP14888    | <i>Desi</i>      | Ca_Desig_denovo              | 8734305                        | (T/C)       |
| 39294       | CadSNP14889    | <i>Desi</i>      | Ca_Desig_denovo              | 8734326                        | (G/T)       |
| 39295       | CadSNP14890    | <i>Desi</i>      | Ca_Desig_denovo              | 8737495                        | (A/G)       |
| 39296       | CadSNP14891    | <i>Desi</i>      | Ca_Desig_denovo              | 8737503                        | (T/C)       |
| 39297       | CadSNP14892    | <i>Desi</i>      | Ca_Desig_denovo              | 8740149                        | (C/A)       |
| 39298       | CadSNP14893    | <i>Desi</i>      | Ca_Desig_denovo              | 8740187                        | (C/G)       |
| 39299       | CadSNP14894    | <i>Desi</i>      | Ca_Desig_denovo              | 8749635                        | (C/A)       |
| 39300       | CadSNP14895    | <i>Desi</i>      | Ca_Desig_denovo              | 8756911                        | (C/A)       |
| 39301       | CadSNP14896    | <i>Desi</i>      | Ca_Desig_denovo              | 8763418                        | (C/T)       |
| 39302       | CadSNP14897    | <i>Desi</i>      | Ca_Desig_denovo              | 8764691                        | (A/T)       |
| 39303       | CadSNP14898    | <i>Desi</i>      | Ca_Desig_denovo              | 8765263                        | (G/A)       |
| 39304       | CadSNP14899    | <i>Desi</i>      | Ca_Desig_denovo              | 8765822                        | (C/T)       |
| 39305       | CadSNP14900    | <i>Desi</i>      | Ca_Desig_denovo              | 8765845                        | (C/T)       |
| 39306       | CadSNP14901    | <i>Desi</i>      | Ca_Desig_denovo              | 8770956                        | (C/T)       |
| 39307       | CadSNP14902    | <i>Desi</i>      | Ca_Desig_denovo              | 8774389                        | (A/G)       |
| 39308       | CadSNP14903    | <i>Desi</i>      | Ca_Desig_denovo              | 8774399                        | (T/C)       |
| 39309       | CadSNP14904    | <i>Desi</i>      | Ca_Desig_denovo              | 8782717                        | (T/C)       |
| 39310       | CadSNP14905    | <i>Desi</i>      | Ca_Desig_denovo              | 8785927                        | (T/A)       |
| 39311       | CadSNP14906    | <i>Desi</i>      | Ca_Desig_denovo              | 8790926                        | (T/A)       |
| 39312       | CadSNP14907    | <i>Desi</i>      | Ca_Desig_denovo              | 8790953                        | (A/G)       |
| 39313       | CadSNP14908    | <i>Desi</i>      | Ca_Desig_denovo              | 8795675                        | (A/G)       |
| 39314       | CadSNP14909    | <i>Desi</i>      | Ca_Desig_denovo              | 8795702                        | (C/G)       |
| 39315       | CadSNP14910    | <i>Desi</i>      | Ca_Desig_denovo              | 8802473                        | (A/C)       |
| 39316       | CadSNP14911    | <i>Desi</i>      | Ca_Desig_denovo              | 8802481                        | (T/G)       |
| 39317       | CadSNP14912    | <i>Desi</i>      | Ca_Desig_denovo              | 8806552                        | (A/G)       |
| 39318       | CadSNP14913    | <i>Desi</i>      | Ca_Desig_denovo              | 8811139                        | (G/C)       |
| 39319       | CadSNP14914    | <i>Desi</i>      | Ca_Desig_denovo              | 8811172                        | (C/T)       |
| 39320       | CadSNP14915    | <i>Desi</i>      | Ca_Desig_denovo              | 8813828                        | (G/C)       |
| 39321       | CadSNP14916    | <i>Desi</i>      | Ca_Desig_denovo              | 8813850                        | (A/G)       |
| 39322       | CadSNP14917    | <i>Desi</i>      | Ca_Desig_denovo              | 8814193                        | (A/G)       |
| 39323       | CadSNP14918    | <i>Desi</i>      | Ca_Desig_denovo              | 8814226                        | (T/C)       |
| 39324       | CadSNP14919    | <i>Desi</i>      | Ca_Desig_denovo              | 8815406                        | (A/G)       |
| 39325       | CadSNP14920    | <i>Desi</i>      | Ca_Desig_denovo              | 8818021                        | (C/G)       |
| 39326       | CadSNP14921    | <i>Desi</i>      | Ca_Desig_denovo              | 8824522                        | (T/C)       |
| 39327       | CadSNP14922    | <i>Desi</i>      | Ca_Desig_denovo              | 8831872                        | (G/T)       |
| 39328       | CadSNP14923    | <i>Desi</i>      | Ca_Desig_denovo              | 8836232                        | (C/T)       |
| 39329       | CadSNP14924    | <i>Desi</i>      | Ca_Desig_denovo              | 8836284                        | (G/A)       |

| <b>S.N.</b> | <b>SNP IDs</b> | <b>Cultivars</b> | <b>Chromosomes/scaffolds</b> | <b>Physical positions (bp)</b> | <b>SNPs</b> |
|-------------|----------------|------------------|------------------------------|--------------------------------|-------------|
| 39330       | CadSNP14925    | <i>Desi</i>      | Ca_Desig_denovo              | 8837899                        | (T/C)       |
| 39331       | CadSNP14926    | <i>Desi</i>      | Ca_Desig_denovo              | 8838800                        | (C/T)       |
| 39332       | CadSNP14927    | <i>Desi</i>      | Ca_Desig_denovo              | 8838810                        | (C/T)       |
| 39333       | CadSNP14928    | <i>Desi</i>      | Ca_Desig_denovo              | 8853007                        | (T/C)       |
| 39334       | CadSNP14929    | <i>Desi</i>      | Ca_Desig_denovo              | 8853010                        | (A/G)       |
| 39335       | CadSNP14930    | <i>Desi</i>      | Ca_Desig_denovo              | 8862291                        | (T/C)       |
| 39336       | CadSNP14931    | <i>Desi</i>      | Ca_Desig_denovo              | 8862300                        | (C/A)       |
| 39337       | CadSNP14932    | <i>Desi</i>      | Ca_Desig_denovo              | 8864462                        | (C/T)       |
| 39338       | CadSNP14933    | <i>Desi</i>      | Ca_Desig_denovo              | 8864471                        | (C/T)       |
| 39339       | CadSNP14934    | <i>Desi</i>      | Ca_Desig_denovo              | 8864734                        | (T/C)       |
| 39340       | CadSNP14935    | <i>Desi</i>      | Ca_Desig_denovo              | 8864742                        | (G/C)       |
| 39341       | CadSNP14936    | <i>Desi</i>      | Ca_Desig_denovo              | 8864743                        | (C/T)       |
| 39342       | CadSNP14937    | <i>Desi</i>      | Ca_Desig_denovo              | 8865160                        | (C/T)       |
| 39343       | CadSNP14938    | <i>Desi</i>      | Ca_Desig_denovo              | 8866085                        | (C/T)       |
| 39344       | CadSNP14939    | <i>Desi</i>      | Ca_Desig_denovo              | 8867692                        | (T/C)       |
| 39345       | CadSNP14940    | <i>Desi</i>      | Ca_Desig_denovo              | 8869826                        | (G/A)       |
| 39346       | CadSNP14941    | <i>Desi</i>      | Ca_Desig_denovo              | 8875123                        | (C/T)       |
| 39347       | CadSNP14942    | <i>Desi</i>      | Ca_Desig_denovo              | 8882636                        | (A/G)       |
| 39348       | CadSNP14943    | <i>Desi</i>      | Ca_Desig_denovo              | 8885181                        | (G/A)       |
| 39349       | CadSNP14944    | <i>Desi</i>      | Ca_Desig_denovo              | 8887373                        | (C/G)       |
| 39350       | CadSNP14945    | <i>Desi</i>      | Ca_Desig_denovo              | 8892181                        | (T/C)       |
| 39351       | CadSNP14946    | <i>Desi</i>      | Ca_Desig_denovo              | 8895466                        | (C/G)       |
| 39352       | CadSNP14947    | <i>Desi</i>      | Ca_Desig_denovo              | 8898379                        | (T/C)       |
| 39353       | CadSNP14948    | <i>Desi</i>      | Ca_Desig_denovo              | 8899152                        | (C/A)       |
| 39354       | CadSNP14949    | <i>Desi</i>      | Ca_Desig_denovo              | 8905323                        | (A/G)       |
| 39355       | CadSNP14950    | <i>Desi</i>      | Ca_Desig_denovo              | 8910258                        | (C/T)       |
| 39356       | CadSNP14951    | <i>Desi</i>      | Ca_Desig_denovo              | 8910589                        | (G/A)       |
| 39357       | CadSNP14952    | <i>Desi</i>      | Ca_Desig_denovo              | 8912116                        | (T/C)       |
| 39358       | CadSNP14953    | <i>Desi</i>      | Ca_Desig_denovo              | 8912149                        | (G/T)       |
| 39359       | CadSNP14954    | <i>Desi</i>      | Ca_Desig_denovo              | 8913323                        | (A/G)       |
| 39360       | CadSNP14955    | <i>Desi</i>      | Ca_Desig_denovo              | 8922577                        | (A/C)       |
| 39361       | CadSNP14956    | <i>Desi</i>      | Ca_Desig_denovo              | 8925560                        | (C/G)       |
| 39362       | CadSNP14957    | <i>Desi</i>      | Ca_Desig_denovo              | 8927099                        | (G/A)       |
| 39363       | CadSNP14958    | <i>Desi</i>      | Ca_Desig_denovo              | 8935283                        | (C/T)       |
| 39364       | CadSNP14959    | <i>Desi</i>      | Ca_Desig_denovo              | 8935334                        | (T/C)       |
| 39365       | CadSNP14960    | <i>Desi</i>      | Ca_Desig_denovo              | 8937403                        | (T/C)       |
| 39366       | CadSNP14961    | <i>Desi</i>      | Ca_Desig_denovo              | 8937433                        | (C/T)       |
| 39367       | CadSNP14962    | <i>Desi</i>      | Ca_Desig_denovo              | 8943207                        | (C/G)       |

| <b>S.N.</b> | <b>SNP IDs</b> | <b>Cultivars</b> | <b>Chromosomes/scaffolds</b> | <b>Physical positions (bp)</b> | <b>SNPs</b> |
|-------------|----------------|------------------|------------------------------|--------------------------------|-------------|
| 39368       | CadSNP14963    | <i>Desi</i>      | Ca_Desig_denovo              | 8943469                        | (C/T)       |
| 39369       | CadSNP14964    | <i>Desi</i>      | Ca_Desig_denovo              | 8943511                        | (C/T)       |
| 39370       | CadSNP14965    | <i>Desi</i>      | Ca_Desig_denovo              | 8945504                        | (C/T)       |
| 39371       | CadSNP14966    | <i>Desi</i>      | Ca_Desig_denovo              | 8948763                        | (C/G)       |
| 39372       | CadSNP14967    | <i>Desi</i>      | Ca_Desig_denovo              | 8948766                        | (A/G)       |
| 39373       | CadSNP14968    | <i>Desi</i>      | Ca_Desig_denovo              | 8948790                        | (C/T)       |
| 39374       | CadSNP14969    | <i>Desi</i>      | Ca_Desig_denovo              | 8953367                        | (G/C)       |
| 39375       | CadSNP14970    | <i>Desi</i>      | Ca_Desig_denovo              | 8953381                        | (A/G)       |
| 39376       | CadSNP14971    | <i>Desi</i>      | Ca_Desig_denovo              | 8959192                        | (C/A)       |
| 39377       | CadSNP14972    | <i>Desi</i>      | Ca_Desig_denovo              | 8970340                        | (A/G)       |
| 39378       | CadSNP14973    | <i>Desi</i>      | Ca_Desig_denovo              | 8970388                        | (A/G)       |
| 39379       | CadSNP14974    | <i>Desi</i>      | Ca_Desig_denovo              | 8974110                        | (T/C)       |
| 39380       | CadSNP14975    | <i>Desi</i>      | Ca_Desig_denovo              | 8986318                        | (G/A)       |
| 39381       | CadSNP14976    | <i>Desi</i>      | Ca_Desig_denovo              | 8986327                        | (G/A)       |
| 39382       | CadSNP14977    | <i>Desi</i>      | Ca_Desig_denovo              | 8994696                        | (C/T)       |
| 39383       | CadSNP14978    | <i>Desi</i>      | Ca_Desig_denovo              | 8994702                        | (G/C)       |
| 39384       | CadSNP14979    | <i>Desi</i>      | Ca_Desig_denovo              | 9001802                        | (G/A)       |
| 39385       | CadSNP14980    | <i>Desi</i>      | Ca_Desig_denovo              | 9007858                        | (T/C)       |
| 39386       | CadSNP14981    | <i>Desi</i>      | Ca_Desig_denovo              | 9017867                        | (G/A)       |
| 39387       | CadSNP14982    | <i>Desi</i>      | Ca_Desig_denovo              | 9022596                        | (C/G)       |
| 39388       | CadSNP14983    | <i>Desi</i>      | Ca_Desig_denovo              | 9022619                        | (A/G)       |
| 39389       | CadSNP14984    | <i>Desi</i>      | Ca_Desig_denovo              | 9032709                        | (G/C)       |
| 39390       | CadSNP14985    | <i>Desi</i>      | Ca_Desig_denovo              | 9034884                        | (C/G)       |
| 39391       | CadSNP14986    | <i>Desi</i>      | Ca_Desig_denovo              | 9034888                        | (A/C)       |
| 39392       | CadSNP14987    | <i>Desi</i>      | Ca_Desig_denovo              | 9037411                        | (C/T)       |
| 39393       | CadSNP14988    | <i>Desi</i>      | Ca_Desig_denovo              | 9037443                        | (A/T)       |
| 39394       | CadSNP14989    | <i>Desi</i>      | Ca_Desig_denovo              | 9043565                        | (C/T)       |
| 39395       | CadSNP14990    | <i>Desi</i>      | Ca_Desig_denovo              | 9052800                        | (C/T)       |
| 39396       | CadSNP14991    | <i>Desi</i>      | Ca_Desig_denovo              | 9061472                        | (T/C)       |
| 39397       | CadSNP14992    | <i>Desi</i>      | Ca_Desig_denovo              | 9061544                        | (C/T)       |
| 39398       | CadSNP14993    | <i>Desi</i>      | Ca_Desig_denovo              | 9062305                        | (A/G)       |
| 39399       | CadSNP14994    | <i>Desi</i>      | Ca_Desig_denovo              | 9062363                        | (G/C)       |
| 39400       | CadSNP14995    | <i>Desi</i>      | Ca_Desig_denovo              | 9062512                        | (C/T)       |
| 39401       | CadSNP14996    | <i>Desi</i>      | Ca_Desig_denovo              | 9062534                        | (A/G)       |
| 39402       | CadSNP14997    | <i>Desi</i>      | Ca_Desig_denovo              | 9078584                        | (A/G)       |
| 39403       | CadSNP14998    | <i>Desi</i>      | Ca_Desig_denovo              | 9079271                        | (C/G)       |
| 39404       | CadSNP14999    | <i>Desi</i>      | Ca_Desig_denovo              | 9084165                        | (A/G)       |
| 39405       | CadSNP15000    | <i>Desi</i>      | Ca_Desig_denovo              | 9095351                        | (T/G)       |

| <b>S.N.</b> | <b>SNP IDs</b> | <b>Cultivars</b> | <b>Chromosomes/scaffolds</b> | <b>Physical positions (bp)</b> | <b>SNPs</b> |
|-------------|----------------|------------------|------------------------------|--------------------------------|-------------|
| 39406       | CadSNP15001    | <i>Desi</i>      | Ca_Desig_denovo              | 9097001                        | (A/G)       |
| 39407       | CadSNP15002    | <i>Desi</i>      | Ca_Desig_denovo              | 9097004                        | (G/A)       |
| 39408       | CadSNP15003    | <i>Desi</i>      | Ca_Desig_denovo              | 9097769                        | (C/T)       |
| 39409       | CadSNP15004    | <i>Desi</i>      | Ca_Desig_denovo              | 9097818                        | (A/G)       |
| 39410       | CadSNP15005    | <i>Desi</i>      | Ca_Desig_denovo              | 9110148                        | (G/A)       |
| 39411       | CadSNP15006    | <i>Desi</i>      | Ca_Desig_denovo              | 9110151                        | (G/C)       |
| 39412       | CadSNP15007    | <i>Desi</i>      | Ca_Desig_denovo              | 9112338                        | (A/T)       |
| 39413       | CadSNP15008    | <i>Desi</i>      | Ca_Desig_denovo              | 9114648                        | (G/T)       |
| 39414       | CadSNP15009    | <i>Desi</i>      | Ca_Desig_denovo              | 9115615                        | (A/C)       |
| 39415       | CadSNP15010    | <i>Desi</i>      | Ca_Desig_denovo              | 9115657                        | (A/G)       |
| 39416       | CadSNP15011    | <i>Desi</i>      | Ca_Desig_denovo              | 9117238                        | (C/T)       |
| 39417       | CadSNP15012    | <i>Desi</i>      | Ca_Desig_denovo              | 9124200                        | (A/C)       |
| 39418       | CadSNP15013    | <i>Desi</i>      | Ca_Desig_denovo              | 9136615                        | (G/C)       |
| 39419       | CadSNP15014    | <i>Desi</i>      | Ca_Desig_denovo              | 9138314                        | (A/G)       |
| 39420       | CadSNP15015    | <i>Desi</i>      | Ca_Desig_denovo              | 9139136                        | (C/T)       |
| 39421       | CadSNP15016    | <i>Desi</i>      | Ca_Desig_denovo              | 9149114                        | (C/T)       |
| 39422       | CadSNP15017    | <i>Desi</i>      | Ca_Desig_denovo              | 9150610                        | (C/G)       |
| 39423       | CadSNP15018    | <i>Desi</i>      | Ca_Desig_denovo              | 9159697                        | (C/T)       |
| 39424       | CadSNP15019    | <i>Desi</i>      | Ca_Desig_denovo              | 9166392                        | (C/G)       |
| 39425       | CadSNP15020    | <i>Desi</i>      | Ca_Desig_denovo              | 9166434                        | (T/G)       |
| 39426       | CadSNP15021    | <i>Desi</i>      | Ca_Desig_denovo              | 9171305                        | (T/C)       |
| 39427       | CadSNP15022    | <i>Desi</i>      | Ca_Desig_denovo              | 9173075                        | (G/T)       |
| 39428       | CadSNP15023    | <i>Desi</i>      | Ca_Desig_denovo              | 9180762                        | (A/G)       |
| 39429       | CadSNP15024    | <i>Desi</i>      | Ca_Desig_denovo              | 9181813                        | (C/T)       |
| 39430       | CadSNP15025    | <i>Desi</i>      | Ca_Desig_denovo              | 9181826                        | (G/A)       |
| 39431       | CadSNP15026    | <i>Desi</i>      | Ca_Desig_denovo              | 9182826                        | (C/T)       |
| 39432       | CadSNP15027    | <i>Desi</i>      | Ca_Desig_denovo              | 9183130                        | (T/C)       |
| 39433       | CadSNP15028    | <i>Desi</i>      | Ca_Desig_denovo              | 9183509                        | (G/A)       |
| 39434       | CadSNP15029    | <i>Desi</i>      | Ca_Desig_denovo              | 9189059                        | (C/T)       |
| 39435       | CadSNP15030    | <i>Desi</i>      | Ca_Desig_denovo              | 9189095                        | (C/T)       |
| 39436       | CadSNP15031    | <i>Desi</i>      | Ca_Desig_denovo              | 9189293                        | (A/G)       |
| 39437       | CadSNP15032    | <i>Desi</i>      | Ca_Desig_denovo              | 9189302                        | (A/G)       |
| 39438       | CadSNP15033    | <i>Desi</i>      | Ca_Desig_denovo              | 9192261                        | (C/G)       |
| 39439       | CadSNP15034    | <i>Desi</i>      | Ca_Desig_denovo              | 9193162                        | (C/G)       |
| 39440       | CadSNP15035    | <i>Desi</i>      | Ca_Desig_denovo              | 9193177                        | (C/T)       |
| 39441       | CadSNP15036    | <i>Desi</i>      | Ca_Desig_denovo              | 9193186                        | (C/A)       |
| 39442       | CadSNP15037    | <i>Desi</i>      | Ca_Desig_denovo              | 9193340                        | (A/G)       |
| 39443       | CadSNP15038    | <i>Desi</i>      | Ca_Desig_denovo              | 9196851                        | (T/A)       |



| <b>S.N.</b> | <b>SNP IDs</b> | <b>Cultivars</b> | <b>Chromosomes/scaffolds</b> | <b>Physical positions (bp)</b> | <b>SNPs</b> |
|-------------|----------------|------------------|------------------------------|--------------------------------|-------------|
| 39444       | CadSNP15039    | <i>Desi</i>      | Ca_Desig_denovo              | 9202213                        | (C/T)       |
| 39445       | CadSNP15040    | <i>Desi</i>      | Ca_Desig_denovo              | 9202249                        | (C/T)       |
| 39446       | CadSNP15041    | <i>Desi</i>      | Ca_Desig_denovo              | 9202735                        | (G/A)       |
| 39447       | CadSNP15042    | <i>Desi</i>      | Ca_Desig_denovo              | 9202741                        | (A/G)       |
| 39448       | CadSNP15043    | <i>Desi</i>      | Ca_Desig_denovo              | 9203009                        | (G/C)       |
| 39449       | CadSNP15044    | <i>Desi</i>      | Ca_Desig_denovo              | 9203059                        | (G/T)       |
| 39450       | CadSNP15045    | <i>Desi</i>      | Ca_Desig_denovo              | 9204511                        | (A/C)       |
| 39451       | CadSNP15046    | <i>Desi</i>      | Ca_Desig_denovo              | 9204536                        | (A/C)       |
| 39452       | CadSNP15047    | <i>Desi</i>      | Ca_Desig_denovo              | 9214252                        | (T/G)       |
| 39453       | CadSNP15048    | <i>Desi</i>      | Ca_Desig_denovo              | 9214592                        | (A/T)       |
| 39454       | CadSNP15049    | <i>Desi</i>      | Ca_Desig_denovo              | 9219862                        | (G/C)       |
| 39455       | CadSNP15050    | <i>Desi</i>      | Ca_Desig_denovo              | 9222854                        | (A/G)       |
| 39456       | CadSNP15051    | <i>Desi</i>      | Ca_Desig_denovo              | 9223751                        | (C/T)       |
| 39457       | CadSNP15052    | <i>Desi</i>      | Ca_Desig_denovo              | 9223814                        | (T/C)       |
| 39458       | CadSNP15053    | <i>Desi</i>      | Ca_Desig_denovo              | 9234173                        | (C/T)       |
| 39459       | CadSNP15054    | <i>Desi</i>      | Ca_Desig_denovo              | 9234202                        | (T/G)       |
| 39460       | CadSNP15055    | <i>Desi</i>      | Ca_Desig_denovo              | 9242406                        | (T/C)       |
| 39461       | CadSNP15056    | <i>Desi</i>      | Ca_Desig_denovo              | 9253448                        | (T/C)       |
| 39462       | CadSNP15057    | <i>Desi</i>      | Ca_Desig_denovo              | 9254453                        | (G/C)       |
| 39463       | CadSNP15058    | <i>Desi</i>      | Ca_Desig_denovo              | 9263695                        | (T/G)       |
| 39464       | CadSNP15059    | <i>Desi</i>      | Ca_Desig_denovo              | 9263707                        | (C/G)       |
| 39465       | CadSNP15060    | <i>Desi</i>      | Ca_Desig_denovo              | 9270479                        | (T/C)       |
| 39466       | CadSNP15061    | <i>Desi</i>      | Ca_Desig_denovo              | 9275330                        | (G/A)       |
| 39467       | CadSNP15062    | <i>Desi</i>      | Ca_Desig_denovo              | 9276340                        | (C/T)       |
| 39468       | CadSNP15063    | <i>Desi</i>      | Ca_Desig_denovo              | 9279820                        | (C/T)       |
| 39469       | CadSNP15064    | <i>Desi</i>      | Ca_Desig_denovo              | 9282367                        | (G/T)       |
| 39470       | CadSNP15065    | <i>Desi</i>      | Ca_Desig_denovo              | 9286265                        | (G/A)       |
| 39471       | CadSNP15066    | <i>Desi</i>      | Ca_Desig_denovo              | 9289696                        | (A/C)       |
| 39472       | CadSNP15067    | <i>Desi</i>      | Ca_Desig_denovo              | 9291667                        | (T/C)       |
| 39473       | CadSNP15068    | <i>Desi</i>      | Ca_Desig_denovo              | 9293338                        | (G/A)       |
| 39474       | CadSNP15069    | <i>Desi</i>      | Ca_Desig_denovo              | 9293343                        | (G/A)       |
| 39475       | CadSNP15070    | <i>Desi</i>      | Ca_Desig_denovo              | 9293514                        | (G/T)       |
| 39476       | CadSNP15071    | <i>Desi</i>      | Ca_Desig_denovo              | 9293558                        | (C/G)       |
| 39477       | CadSNP15072    | <i>Desi</i>      | Ca_Desig_denovo              | 9294480                        | (T/C)       |
| 39478       | CadSNP15073    | <i>Desi</i>      | Ca_Desig_denovo              | 9294881                        | (A/G)       |
| 39479       | CadSNP15074    | <i>Desi</i>      | Ca_Desig_denovo              | 9294883                        | (T/G)       |
| 39480       | CadSNP15075    | <i>Desi</i>      | Ca_Desig_denovo              | 9301575                        | (C/G)       |
| 39481       | CadSNP15076    | <i>Desi</i>      | Ca_Desig_denovo              | 9301581                        | (C/T)       |

| <b>S.N.</b> | <b>SNP IDs</b> | <b>Cultivars</b> | <b>Chromosomes/scaffolds</b> | <b>Physical positions (bp)</b> | <b>SNPs</b> |
|-------------|----------------|------------------|------------------------------|--------------------------------|-------------|
| 39482       | CadSNP15077    | <i>Desi</i>      | Ca_Desig_denovo              | 9302074                        | (G/A)       |
| 39483       | CadSNP15078    | <i>Desi</i>      | Ca_Desig_denovo              | 9314546                        | (G/A)       |
| 39484       | CadSNP15079    | <i>Desi</i>      | Ca_Desig_denovo              | 9317002                        | (A/G)       |
| 39485       | CadSNP15080    | <i>Desi</i>      | Ca_Desig_denovo              | 9319630                        | (G/A)       |
| 39486       | CadSNP15081    | <i>Desi</i>      | Ca_Desig_denovo              | 9319678                        | (G/T)       |
| 39487       | CadSNP15082    | <i>Desi</i>      | Ca_Desig_denovo              | 9321453                        | (G/C)       |
| 39488       | CadSNP15083    | <i>Desi</i>      | Ca_Desig_denovo              | 9321872                        | (C/G)       |
| 39489       | CadSNP15084    | <i>Desi</i>      | Ca_Desig_denovo              | 9324222                        | (G/A)       |
| 39490       | CadSNP15085    | <i>Desi</i>      | Ca_Desig_denovo              | 9326008                        | (C/G)       |
| 39491       | CadSNP15086    | <i>Desi</i>      | Ca_Desig_denovo              | 9327557                        | (G/C)       |
| 39492       | CadSNP15087    | <i>Desi</i>      | Ca_Desig_denovo              | 9330717                        | (C/T)       |
| 39493       | CadSNP15088    | <i>Desi</i>      | Ca_Desig_denovo              | 9330752                        | (G/C)       |
| 39494       | CadSNP15089    | <i>Desi</i>      | Ca_Desig_denovo              | 9334534                        | (G/T)       |
| 39495       | CadSNP15090    | <i>Desi</i>      | Ca_Desig_denovo              | 9338202                        | (T/C)       |
| 39496       | CadSNP15091    | <i>Desi</i>      | Ca_Desig_denovo              | 9338570                        | (G/A)       |
| 39497       | CadSNP15092    | <i>Desi</i>      | Ca_Desig_denovo              | 9344573                        | (A/G)       |
| 39498       | CadSNP15093    | <i>Desi</i>      | Ca_Desig_denovo              | 9344582                        | (C/T)       |
| 39499       | CadSNP15094    | <i>Desi</i>      | Ca_Desig_denovo              | 9345379                        | (T/G)       |
| 39500       | CadSNP15095    | <i>Desi</i>      | Ca_Desig_denovo              | 9347080                        | (G/C)       |
| 39501       | CadSNP15096    | <i>Desi</i>      | Ca_Desig_denovo              | 9355006                        | (A/G)       |
| 39502       | CadSNP15097    | <i>Desi</i>      | Ca_Desig_denovo              | 9355056                        | (A/G)       |
| 39503       | CadSNP15098    | <i>Desi</i>      | Ca_Desig_denovo              | 9364870                        | (C/T)       |
| 39504       | CadSNP15099    | <i>Desi</i>      | Ca_Desig_denovo              | 9368180                        | (T/C)       |
| 39505       | CadSNP15100    | <i>Desi</i>      | Ca_Desig_denovo              | 9368194                        | (T/C)       |
| 39506       | CadSNP15101    | <i>Desi</i>      | Ca_Desig_denovo              | 9383075                        | (G/A)       |
| 39507       | CadSNP15102    | <i>Desi</i>      | Ca_Desig_denovo              | 9383158                        | (C/A)       |
| 39508       | CadSNP15103    | <i>Desi</i>      | Ca_Desig_denovo              | 9383203                        | (C/T)       |
| 39509       | CadSNP15104    | <i>Desi</i>      | Ca_Desig_denovo              | 9384658                        | (T/C)       |
| 39510       | CadSNP15105    | <i>Desi</i>      | Ca_Desig_denovo              | 9384676                        | (A/G)       |
| 39511       | CadSNP15106    | <i>Desi</i>      | Ca_Desig_denovo              | 9391378                        | (G/T)       |
| 39512       | CadSNP15107    | <i>Desi</i>      | Ca_Desig_denovo              | 9391383                        | (T/C)       |
| 39513       | CadSNP15108    | <i>Desi</i>      | Ca_Desig_denovo              | 9395068                        | (A/G)       |
| 39514       | CadSNP15109    | <i>Desi</i>      | Ca_Desig_denovo              | 9395083                        | (C/A)       |
| 39515       | CadSNP15110    | <i>Desi</i>      | Ca_Desig_denovo              | 9401954                        | (A/G)       |
| 39516       | CadSNP15111    | <i>Desi</i>      | Ca_Desig_denovo              | 9402987                        | (A/C)       |
| 39517       | CadSNP15112    | <i>Desi</i>      | Ca_Desig_denovo              | 9403023                        | (G/A)       |
| 39518       | CadSNP15113    | <i>Desi</i>      | Ca_Desig_denovo              | 9403623                        | (A/C)       |
| 39519       | CadSNP15114    | <i>Desi</i>      | Ca_Desig_denovo              | 9404194                        | (G/A)       |

| <b>S.N.</b> | <b>SNP IDs</b> | <b>Cultivars</b> | <b>Chromosomes/scaffolds</b> | <b>Physical positions (bp)</b> | <b>SNPs</b> |
|-------------|----------------|------------------|------------------------------|--------------------------------|-------------|
| 39520       | CadSNP15115    | <i>Desi</i>      | Ca_Desig_denovo              | 9405655                        | (C/A)       |
| 39521       | CadSNP15116    | <i>Desi</i>      | Ca_Desig_denovo              | 9415348                        | (G/C)       |
| 39522       | CadSNP15117    | <i>Desi</i>      | Ca_Desig_denovo              | 9415351                        | (C/T)       |
| 39523       | CadSNP15118    | <i>Desi</i>      | Ca_Desig_denovo              | 9415784                        | (A/C)       |
| 39524       | CadSNP15119    | <i>Desi</i>      | Ca_Desig_denovo              | 9415785                        | (G/A)       |
| 39525       | CadSNP15120    | <i>Desi</i>      | Ca_Desig_denovo              | 9422369                        | (C/T)       |
| 39526       | CadSNP15121    | <i>Desi</i>      | Ca_Desig_denovo              | 9430180                        | (C/T)       |
| 39527       | CadSNP15122    | <i>Desi</i>      | Ca_Desig_denovo              | 9443885                        | (T/C)       |
| 39528       | CadSNP15123    | <i>Desi</i>      | Ca_Desig_denovo              | 9443933                        | (T/C)       |
| 39529       | CadSNP15124    | <i>Desi</i>      | Ca_Desig_denovo              | 9444257                        | (C/T)       |
| 39530       | CadSNP15125    | <i>Desi</i>      | Ca_Desig_denovo              | 9444297                        | (A/G)       |
| 39531       | CadSNP15126    | <i>Desi</i>      | Ca_Desig_denovo              | 9449555                        | (G/C)       |
| 39532       | CadSNP15127    | <i>Desi</i>      | Ca_Desig_denovo              | 9450946                        | (G/A)       |
| 39533       | CadSNP15128    | <i>Desi</i>      | Ca_Desig_denovo              | 9451033                        | (T/C)       |
| 39534       | CadSNP15129    | <i>Desi</i>      | Ca_Desig_denovo              | 9456264                        | (C/G)       |
| 39535       | CadSNP15130    | <i>Desi</i>      | Ca_Desig_denovo              | 9465088                        | (T/G)       |
| 39536       | CadSNP15131    | <i>Desi</i>      | Ca_Desig_denovo              | 9466407                        | (G/A)       |
| 39537       | CadSNP15132    | <i>Desi</i>      | Ca_Desig_denovo              | 9466426                        | (C/T)       |
| 39538       | CadSNP15133    | <i>Desi</i>      | Ca_Desig_denovo              | 9466893                        | (G/A)       |
| 39539       | CadSNP15134    | <i>Desi</i>      | Ca_Desig_denovo              | 9471620                        | (T/C)       |
| 39540       | CadSNP15135    | <i>Desi</i>      | Ca_Desig_denovo              | 9471624                        | (T/C)       |
| 39541       | CadSNP15136    | <i>Desi</i>      | Ca_Desig_denovo              | 9476998                        | (G/T)       |
| 39542       | CadSNP15137    | <i>Desi</i>      | Ca_Desig_denovo              | 9477003                        | (A/T)       |
| 39543       | CadSNP15138    | <i>Desi</i>      | Ca_Desig_denovo              | 9484858                        | (C/G)       |
| 39544       | CadSNP15139    | <i>Desi</i>      | Ca_Desig_denovo              | 9492331                        | (C/T)       |
| 39545       | CadSNP15140    | <i>Desi</i>      | Ca_Desig_denovo              | 9492364                        | (T/C)       |
| 39546       | CadSNP15141    | <i>Desi</i>      | Ca_Desig_denovo              | 9493936                        | (G/A)       |
| 39547       | CadSNP15142    | <i>Desi</i>      | Ca_Desig_denovo              | 9495173                        | (G/A)       |
| 39548       | CadSNP15143    | <i>Desi</i>      | Ca_Desig_denovo              | 9497587                        | (G/T)       |
| 39549       | CadSNP15144    | <i>Desi</i>      | Ca_Desig_denovo              | 9506202                        | (A/C)       |
| 39550       | CadSNP15145    | <i>Desi</i>      | Ca_Desig_denovo              | 9506790                        | (T/C)       |
| 39551       | CadSNP15146    | <i>Desi</i>      | Ca_Desig_denovo              | 9508499                        | (C/A)       |
| 39552       | CadSNP15147    | <i>Desi</i>      | Ca_Desig_denovo              | 9508507                        | (G/A)       |
| 39553       | CadSNP15148    | <i>Desi</i>      | Ca_Desig_denovo              | 9510875                        | (A/G)       |
| 39554       | CadSNP15149    | <i>Desi</i>      | Ca_Desig_denovo              | 9513837                        | (A/C)       |
| 39555       | CadSNP15150    | <i>Desi</i>      | Ca_Desig_denovo              | 9523597                        | (A/G)       |
| 39556       | CadSNP15151    | <i>Desi</i>      | Ca_Desig_denovo              | 9523970                        | (T/C)       |
| 39557       | CadSNP15152    | <i>Desi</i>      | Ca_Desig_denovo              | 9523982                        | (G/C)       |

| <b>S.N.</b> | <b>SNP IDs</b> | <b>Cultivars</b> | <b>Chromosomes/scaffolds</b> | <b>Physical positions (bp)</b> | <b>SNPs</b> |
|-------------|----------------|------------------|------------------------------|--------------------------------|-------------|
| 39558       | CadSNP15153    | <i>Desi</i>      | Ca_Desig_denovo              | 9526228                        | (C/T)       |
| 39559       | CadSNP15154    | <i>Desi</i>      | Ca_Desig_denovo              | 9530846                        | (T/C)       |
| 39560       | CadSNP15155    | <i>Desi</i>      | Ca_Desig_denovo              | 9532799                        | (T/G)       |
| 39561       | CadSNP15156    | <i>Desi</i>      | Ca_Desig_denovo              | 9532862                        | (C/G)       |
| 39562       | CadSNP15157    | <i>Desi</i>      | Ca_Desig_denovo              | 9538619                        | (A/G)       |
| 39563       | CadSNP15158    | <i>Desi</i>      | Ca_Desig_denovo              | 9540880                        | (C/G)       |
| 39564       | CadSNP15159    | <i>Desi</i>      | Ca_Desig_denovo              | 9541873                        | (G/T)       |
| 39565       | CadSNP15160    | <i>Desi</i>      | Ca_Desig_denovo              | 9541885                        | (A/G)       |
| 39566       | CadSNP15161    | <i>Desi</i>      | Ca_Desig_denovo              | 9544423                        | (T/G)       |
| 39567       | CadSNP15162    | <i>Desi</i>      | Ca_Desig_denovo              | 9545644                        | (G/C)       |
| 39568       | CadSNP15163    | <i>Desi</i>      | Ca_Desig_denovo              | 9549619                        | (T/C)       |
| 39569       | CadSNP15164    | <i>Desi</i>      | Ca_Desig_denovo              | 9550920                        | (G/T)       |
| 39570       | CadSNP15165    | <i>Desi</i>      | Ca_Desig_denovo              | 9550964                        | (T/C)       |
| 39571       | CadSNP15166    | <i>Desi</i>      | Ca_Desig_denovo              | 9551258                        | (A/G)       |
| 39572       | CadSNP15167    | <i>Desi</i>      | Ca_Desig_denovo              | 9556627                        | (G/A)       |
| 39573       | CadSNP15168    | <i>Desi</i>      | Ca_Desig_denovo              | 9556681                        | (G/A)       |
| 39574       | CadSNP15169    | <i>Desi</i>      | Ca_Desig_denovo              | 9559072                        | (C/G)       |
| 39575       | CadSNP15170    | <i>Desi</i>      | Ca_Desig_denovo              | 9568409                        | (T/C)       |
| 39576       | CadSNP15171    | <i>Desi</i>      | Ca_Desig_denovo              | 9573199                        | (G/T)       |
| 39577       | CadSNP15172    | <i>Desi</i>      | Ca_Desig_denovo              | 9573205                        | (G/A)       |
| 39578       | CadSNP15173    | <i>Desi</i>      | Ca_Desig_denovo              | 9574171                        | (G/T)       |
| 39579       | CadSNP15174    | <i>Desi</i>      | Ca_Desig_denovo              | 9575057                        | (C/G)       |
| 39580       | CadSNP15175    | <i>Desi</i>      | Ca_Desig_denovo              | 9575103                        | (T/G)       |
| 39581       | CadSNP15176    | <i>Desi</i>      | Ca_Desig_denovo              | 9575113                        | (C/G)       |
| 39582       | CadSNP15177    | <i>Desi</i>      | Ca_Desig_denovo              | 9577431                        | (C/A)       |
| 39583       | CadSNP15178    | <i>Desi</i>      | Ca_Desig_denovo              | 9578179                        | (C/G)       |
| 39584       | CadSNP15179    | <i>Desi</i>      | Ca_Desig_denovo              | 9578182                        | (A/G)       |
| 39585       | CadSNP15180    | <i>Desi</i>      | Ca_Desig_denovo              | 9578194                        | (C/T)       |
| 39586       | CadSNP15181    | <i>Desi</i>      | Ca_Desig_denovo              | 9583243                        | (C/T)       |
| 39587       | CadSNP15182    | <i>Desi</i>      | Ca_Desig_denovo              | 9583846                        | (C/T)       |
| 39588       | CadSNP15183    | <i>Desi</i>      | Ca_Desig_denovo              | 9583888                        | (T/A)       |
| 39589       | CadSNP15184    | <i>Desi</i>      | Ca_Desig_denovo              | 9584067                        | (G/T)       |
| 39590       | CadSNP15185    | <i>Desi</i>      | Ca_Desig_denovo              | 9584110                        | (G/A)       |
| 39591       | CadSNP15186    | <i>Desi</i>      | Ca_Desig_denovo              | 9588155                        | (C/T)       |
| 39592       | CadSNP15187    | <i>Desi</i>      | Ca_Desig_denovo              | 9591659                        | (G/A)       |
| 39593       | CadSNP15188    | <i>Desi</i>      | Ca_Desig_denovo              | 9591665                        | (G/C)       |
| 39594       | CadSNP15189    | <i>Desi</i>      | Ca_Desig_denovo              | 9592741                        | (G/C)       |
| 39595       | CadSNP15190    | <i>Desi</i>      | Ca_Desig_denovo              | 9592765                        | (A/G)       |

| <b>S.N.</b> | <b>SNP IDs</b> | <b>Cultivars</b> | <b>Chromosomes/scaffolds</b> | <b>Physical positions (bp)</b> | <b>SNPs</b> |
|-------------|----------------|------------------|------------------------------|--------------------------------|-------------|
| 39596       | CadSNP15191    | <i>Desi</i>      | Ca_Desig_denovo              | 9596342                        | (T/C)       |
| 39597       | CadSNP15192    | <i>Desi</i>      | Ca_Desig_denovo              | 9597145                        | (A/G)       |
| 39598       | CadSNP15193    | <i>Desi</i>      | Ca_Desig_denovo              | 9597169                        | (G/C)       |
| 39599       | CadSNP15194    | <i>Desi</i>      | Ca_Desig_denovo              | 9601144                        | (T/C)       |
| 39600       | CadSNP15195    | <i>Desi</i>      | Ca_Desig_denovo              | 9601164                        | (A/G)       |
| 39601       | CadSNP15196    | <i>Desi</i>      | Ca_Desig_denovo              | 9605785                        | (A/C)       |
| 39602       | CadSNP15197    | <i>Desi</i>      | Ca_Desig_denovo              | 9609039                        | (A/G)       |
| 39603       | CadSNP15198    | <i>Desi</i>      | Ca_Desig_denovo              | 9619771                        | (G/A)       |
| 39604       | CadSNP15199    | <i>Desi</i>      | Ca_Desig_denovo              | 9619795                        | (C/T)       |
| 39605       | CadSNP15200    | <i>Desi</i>      | Ca_Desig_denovo              | 9631185                        | (G/T)       |
| 39606       | CadSNP15201    | <i>Desi</i>      | Ca_Desig_denovo              | 9631191                        | (T/C)       |
| 39607       | CadSNP15202    | <i>Desi</i>      | Ca_Desig_denovo              | 9631194                        | (A/G)       |
| 39608       | CadSNP15203    | <i>Desi</i>      | Ca_Desig_denovo              | 9632473                        | (G/A)       |
| 39609       | CadSNP15204    | <i>Desi</i>      | Ca_Desig_denovo              | 9634443                        | (T/C)       |
| 39610       | CadSNP15205    | <i>Desi</i>      | Ca_Desig_denovo              | 9634447                        | (A/G)       |
| 39611       | CadSNP15206    | <i>Desi</i>      | Ca_Desig_denovo              | 9638857                        | (A/C)       |
| 39612       | CadSNP15207    | <i>Desi</i>      | Ca_Desig_denovo              | 9638887                        | (G/T)       |
| 39613       | CadSNP15208    | <i>Desi</i>      | Ca_Desig_denovo              | 9643010                        | (C/G)       |
| 39614       | CadSNP15209    | <i>Desi</i>      | Ca_Desig_denovo              | 9643025                        | (C/G)       |
| 39615       | CadSNP15210    | <i>Desi</i>      | Ca_Desig_denovo              | 9654075                        | (G/A)       |
| 39616       | CadSNP15211    | <i>Desi</i>      | Ca_Desig_denovo              | 9654088                        | (G/T)       |
| 39617       | CadSNP15212    | <i>Desi</i>      | Ca_Desig_denovo              | 9654386                        | (A/G)       |
| 39618       | CadSNP15213    | <i>Desi</i>      | Ca_Desig_denovo              | 9654395                        | (A/G)       |
| 39619       | CadSNP15214    | <i>Desi</i>      | Ca_Desig_denovo              | 9665747                        | (T/C)       |
| 39620       | CadSNP15215    | <i>Desi</i>      | Ca_Desig_denovo              | 9666449                        | (T/C)       |
| 39621       | CadSNP15216    | <i>Desi</i>      | Ca_Desig_denovo              | 9669877                        | (C/T)       |
| 39622       | CadSNP15217    | <i>Desi</i>      | Ca_Desig_denovo              | 9670141                        | (A/C)       |
| 39623       | CadSNP15218    | <i>Desi</i>      | Ca_Desig_denovo              | 9670438                        | (T/C)       |
| 39624       | CadSNP15219    | <i>Desi</i>      | Ca_Desig_denovo              | 9670447                        | (T/G)       |
| 39625       | CadSNP15220    | <i>Desi</i>      | Ca_Desig_denovo              | 9671856                        | (C/G)       |
| 39626       | CadSNP15221    | <i>Desi</i>      | Ca_Desig_denovo              | 9672559                        | (T/G)       |
| 39627       | CadSNP15222    | <i>Desi</i>      | Ca_Desig_denovo              | 9672786                        | (C/A)       |
| 39628       | CadSNP15223    | <i>Desi</i>      | Ca_Desig_denovo              | 9676597                        | (A/G)       |
| 39629       | CadSNP15224    | <i>Desi</i>      | Ca_Desig_denovo              | 9676642                        | (A/G)       |
| 39630       | CadSNP15225    | <i>Desi</i>      | Ca_Desig_denovo              | 9679365                        | (T/C)       |
| 39631       | CadSNP15226    | <i>Desi</i>      | Ca_Desig_denovo              | 9679384                        | (C/A)       |
| 39632       | CadSNP15227    | <i>Desi</i>      | Ca_Desig_denovo              | 9689032                        | (T/C)       |
| 39633       | CadSNP15228    | <i>Desi</i>      | Ca_Desig_denovo              | 9689035                        | (T/G)       |

| <b>S.N.</b> | <b>SNP IDs</b> | <b>Cultivars</b> | <b>Chromosomes/scaffolds</b> | <b>Physical positions (bp)</b> | <b>SNPs</b> |
|-------------|----------------|------------------|------------------------------|--------------------------------|-------------|
| 39634       | CadSNP15229    | <i>Desi</i>      | Ca_Desig_denovo              | 9695833                        | (C/G)       |
| 39635       | CadSNP15230    | <i>Desi</i>      | Ca_Desig_denovo              | 9695858                        | (C/T)       |
| 39636       | CadSNP15231    | <i>Desi</i>      | Ca_Desig_denovo              | 9697627                        | (T/G)       |
| 39637       | CadSNP15232    | <i>Desi</i>      | Ca_Desig_denovo              | 9700133                        | (T/C)       |
| 39638       | CadSNP15233    | <i>Desi</i>      | Ca_Desig_denovo              | 9701680                        | (A/G)       |
| 39639       | CadSNP15234    | <i>Desi</i>      | Ca_Desig_denovo              | 9701704                        | (C/G)       |
| 39640       | CadSNP15235    | <i>Desi</i>      | Ca_Desig_denovo              | 9717672                        | (T/C)       |
| 39641       | CadSNP15236    | <i>Desi</i>      | Ca_Desig_denovo              | 9717673                        | (T/C)       |
| 39642       | CadSNP15237    | <i>Desi</i>      | Ca_Desig_denovo              | 9717677                        | (C/G)       |
| 39643       | CadSNP15238    | <i>Desi</i>      | Ca_Desig_denovo              | 9724278                        | (T/C)       |
| 39644       | CadSNP15239    | <i>Desi</i>      | Ca_Desig_denovo              | 9726446                        | (G/C)       |
| 39645       | CadSNP15240    | <i>Desi</i>      | Ca_Desig_denovo              | 9733406                        | (C/T)       |
| 39646       | CadSNP15241    | <i>Desi</i>      | Ca_Desig_denovo              | 9733411                        | (C/T)       |
| 39647       | CadSNP15242    | <i>Desi</i>      | Ca_Desig_denovo              | 9739925                        | (T/C)       |
| 39648       | CadSNP15243    | <i>Desi</i>      | Ca_Desig_denovo              | 9742413                        | (A/G)       |
| 39649       | CadSNP15244    | <i>Desi</i>      | Ca_Desig_denovo              | 9742434                        | (C/T)       |
| 39650       | CadSNP15245    | <i>Desi</i>      | Ca_Desig_denovo              | 9744190                        | (T/C)       |
| 39651       | CadSNP15246    | <i>Desi</i>      | Ca_Desig_denovo              | 9746641                        | (G/C)       |
| 39652       | CadSNP15247    | <i>Desi</i>      | Ca_Desig_denovo              | 9747259                        | (G/C)       |
| 39653       | CadSNP15248    | <i>Desi</i>      | Ca_Desig_denovo              | 9747265                        | (C/T)       |
| 39654       | CadSNP15249    | <i>Desi</i>      | Ca_Desig_denovo              | 9749773                        | (A/G)       |
| 39655       | CadSNP15250    | <i>Desi</i>      | Ca_Desig_denovo              | 9749776                        | (C/A)       |
| 39656       | CadSNP15251    | <i>Desi</i>      | Ca_Desig_denovo              | 9752515                        | (A/G)       |
| 39657       | CadSNP15252    | <i>Desi</i>      | Ca_Desig_denovo              | 9752524                        | (C/T)       |
| 39658       | CadSNP15253    | <i>Desi</i>      | Ca_Desig_denovo              | 9753700                        | (T/C)       |
| 39659       | CadSNP15254    | <i>Desi</i>      | Ca_Desig_denovo              | 9758789                        | (T/G)       |
| 39660       | CadSNP15255    | <i>Desi</i>      | Ca_Desig_denovo              | 9758834                        | (A/C)       |
| 39661       | CadSNP15256    | <i>Desi</i>      | Ca_Desig_denovo              | 9760265                        | (C/T)       |
| 39662       | CadSNP15257    | <i>Desi</i>      | Ca_Desig_denovo              | 9760299                        | (G/A)       |
| 39663       | CadSNP15258    | <i>Desi</i>      | Ca_Desig_denovo              | 9764479                        | (C/G)       |
| 39664       | CadSNP15259    | <i>Desi</i>      | Ca_Desig_denovo              | 9767860                        | (A/C)       |
| 39665       | CadSNP15260    | <i>Desi</i>      | Ca_Desig_denovo              | 9768270                        | (A/C)       |
| 39666       | CadSNP15261    | <i>Desi</i>      | Ca_Desig_denovo              | 9768292                        | (G/C)       |
| 39667       | CadSNP15262    | <i>Desi</i>      | Ca_Desig_denovo              | 9772478                        | (C/T)       |
| 39668       | CadSNP15263    | <i>Desi</i>      | Ca_Desig_denovo              | 9772487                        | (T/G)       |
| 39669       | CadSNP15264    | <i>Desi</i>      | Ca_Desig_denovo              | 9779625                        | (A/G)       |
| 39670       | CadSNP15265    | <i>Desi</i>      | Ca_Desig_denovo              | 9779678                        | (G/A)       |
| 39671       | CadSNP15266    | <i>Desi</i>      | Ca_Desig_denovo              | 9784350                        | (G/C)       |

| <b>S.N.</b> | <b>SNP IDs</b> | <b>Cultivars</b> | <b>Chromosomes/scaffolds</b> | <b>Physical positions (bp)</b> | <b>SNPs</b> |
|-------------|----------------|------------------|------------------------------|--------------------------------|-------------|
| 39672       | CadSNP15267    | <i>Desi</i>      | Ca_Desig_denovo              | 9784359                        | (T/C)       |
| 39673       | CadSNP15268    | <i>Desi</i>      | Ca_Desig_denovo              | 9791531                        | (C/G)       |
| 39674       | CadSNP15269    | <i>Desi</i>      | Ca_Desig_denovo              | 9791555                        | (T/C)       |
| 39675       | CadSNP15270    | <i>Desi</i>      | Ca_Desig_denovo              | 9793191                        | (A/C)       |
| 39676       | CadSNP15271    | <i>Desi</i>      | Ca_Desig_denovo              | 9795718                        | (G/T)       |
| 39677       | CadSNP15272    | <i>Desi</i>      | Ca_Desig_denovo              | 9795719                        | (T/C)       |
| 39678       | CadSNP15273    | <i>Desi</i>      | Ca_Desig_denovo              | 9796366                        | (A/G)       |
| 39679       | CadSNP15274    | <i>Desi</i>      | Ca_Desig_denovo              | 9796855                        | (C/T)       |
| 39680       | CadSNP15275    | <i>Desi</i>      | Ca_Desig_denovo              | 9799566                        | (A/G)       |
| 39681       | CadSNP15276    | <i>Desi</i>      | Ca_Desig_denovo              | 9804078                        | (T/C)       |
| 39682       | CadSNP15277    | <i>Desi</i>      | Ca_Desig_denovo              | 9804193                        | (G/A)       |
| 39683       | CadSNP15278    | <i>Desi</i>      | Ca_Desig_denovo              | 9804202                        | (A/G)       |
| 39684       | CadSNP15279    | <i>Desi</i>      | Ca_Desig_denovo              | 9810496                        | (T/C)       |
| 39685       | CadSNP15280    | <i>Desi</i>      | Ca_Desig_denovo              | 9810535                        | (G/C)       |
| 39686       | CadSNP15281    | <i>Desi</i>      | Ca_Desig_denovo              | 9822428                        | (G/A)       |
| 39687       | CadSNP15282    | <i>Desi</i>      | Ca_Desig_denovo              | 9822468                        | (A/G)       |
| 39688       | CadSNP15283    | <i>Desi</i>      | Ca_Desig_denovo              | 9824006                        | (G/A)       |
| 39689       | CadSNP15284    | <i>Desi</i>      | Ca_Desig_denovo              | 9824036                        | (A/G)       |
| 39690       | CadSNP15285    | <i>Desi</i>      | Ca_Desig_denovo              | 9825646                        | (A/C)       |
| 39691       | CadSNP15286    | <i>Desi</i>      | Ca_Desig_denovo              | 9825670                        | (A/G)       |
| 39692       | CadSNP15287    | <i>Desi</i>      | Ca_Desig_denovo              | 9829465                        | (A/C)       |
| 39693       | CadSNP15288    | <i>Desi</i>      | Ca_Desig_denovo              | 9831461                        | (A/G)       |
| 39694       | CadSNP15289    | <i>Desi</i>      | Ca_Desig_denovo              | 9831467                        | (T/C)       |
| 39695       | CadSNP15290    | <i>Desi</i>      | Ca_Desig_denovo              | 9832643                        | (G/C)       |
| 39696       | CadSNP15291    | <i>Desi</i>      | Ca_Desig_denovo              | 9832658                        | (C/T)       |
| 39697       | CadSNP15292    | <i>Desi</i>      | Ca_Desig_denovo              | 9844062                        | (A/G)       |
| 39698       | CadSNP15293    | <i>Desi</i>      | Ca_Desig_denovo              | 9847609                        | (C/T)       |
| 39699       | CadSNP15294    | <i>Desi</i>      | Ca_Desig_denovo              | 9847678                        | (A/G)       |
| 39700       | CadSNP15295    | <i>Desi</i>      | Ca_Desig_denovo              | 9858347                        | (G/A)       |
| 39701       | CadSNP15296    | <i>Desi</i>      | Ca_Desig_denovo              | 9863124                        | (G/T)       |
| 39702       | CadSNP15297    | <i>Desi</i>      | Ca_Desig_denovo              | 9866292                        | (A/C)       |
| 39703       | CadSNP15298    | <i>Desi</i>      | Ca_Desig_denovo              | 9869459                        | (C/G)       |
| 39704       | CadSNP15299    | <i>Desi</i>      | Ca_Desig_denovo              | 9869470                        | (A/C)       |
| 39705       | CadSNP15300    | <i>Desi</i>      | Ca_Desig_denovo              | 9880569                        | (A/G)       |
| 39706       | CadSNP15301    | <i>Desi</i>      | Ca_Desig_denovo              | 9880570                        | (G/A)       |
| 39707       | CadSNP15302    | <i>Desi</i>      | Ca_Desig_denovo              | 9882657                        | (G/T)       |
| 39708       | CadSNP15303    | <i>Desi</i>      | Ca_Desig_denovo              | 9882659                        | (T/C)       |
| 39709       | CadSNP15304    | <i>Desi</i>      | Ca_Desig_denovo              | 9888359                        | (C/T)       |

| <b>S.N.</b> | <b>SNP IDs</b> | <b>Cultivars</b> | <b>Chromosomes/scaffolds</b> | <b>Physical positions (bp)</b> | <b>SNPs</b> |
|-------------|----------------|------------------|------------------------------|--------------------------------|-------------|
| 39710       | CadSNP15305    | <i>Desi</i>      | Ca_Desig_denovo              | 9905438                        | (C/T)       |
| 39711       | CadSNP15306    | <i>Desi</i>      | Ca_Desig_denovo              | 9906776                        | (A/G)       |
| 39712       | CadSNP15307    | <i>Desi</i>      | Ca_Desig_denovo              | 9907472                        | (C/G)       |
| 39713       | CadSNP15308    | <i>Desi</i>      | Ca_Desig_denovo              | 9912338                        | (T/C)       |
| 39714       | CadSNP15309    | <i>Desi</i>      | Ca_Desig_denovo              | 9912392                        | (G/C)       |
| 39715       | CadSNP15310    | <i>Desi</i>      | Ca_Desig_denovo              | 9913568                        | (C/T)       |
| 39716       | CadSNP15311    | <i>Desi</i>      | Ca_Desig_denovo              | 9914370                        | (A/G)       |
| 39717       | CadSNP15312    | <i>Desi</i>      | Ca_Desig_denovo              | 9916516                        | (C/T)       |
| 39718       | CadSNP15313    | <i>Desi</i>      | Ca_Desig_denovo              | 9916573                        | (C/A)       |
| 39719       | CadSNP15314    | <i>Desi</i>      | Ca_Desig_denovo              | 9920056                        | (C/T)       |
| 39720       | CadSNP15315    | <i>Desi</i>      | Ca_Desig_denovo              | 9920113                        | (T/G)       |
| 39721       | CadSNP15316    | <i>Desi</i>      | Ca_Desig_denovo              | 9925169                        | (G/T)       |
| 39722       | CadSNP15317    | <i>Desi</i>      | Ca_Desig_denovo              | 9925185                        | (T/C)       |
| 39723       | CadSNP15318    | <i>Desi</i>      | Ca_Desig_denovo              | 9929350                        | (C/T)       |
| 39724       | CadSNP15319    | <i>Desi</i>      | Ca_Desig_denovo              | 9930764                        | (A/G)       |
| 39725       | CadSNP15320    | <i>Desi</i>      | Ca_Desig_denovo              | 9936594                        | (T/C)       |
| 39726       | CadSNP15321    | <i>Desi</i>      | Ca_Desig_denovo              | 9939126                        | (T/A)       |
| 39727       | CadSNP15322    | <i>Desi</i>      | Ca_Desig_denovo              | 9939196                        | (C/T)       |
| 39728       | CadSNP15323    | <i>Desi</i>      | Ca_Desig_denovo              | 9941162                        | (A/G)       |
| 39729       | CadSNP15324    | <i>Desi</i>      | Ca_Desig_denovo              | 9941638                        | (G/A)       |
| 39730       | CadSNP15325    | <i>Desi</i>      | Ca_Desig_denovo              | 9941668                        | (C/T)       |
| 39731       | CadSNP15326    | <i>Desi</i>      | Ca_Desig_denovo              | 9942755                        | (T/C)       |
| 39732       | CadSNP15327    | <i>Desi</i>      | Ca_Desig_denovo              | 9949801                        | (G/A)       |
| 39733       | CadSNP15328    | <i>Desi</i>      | Ca_Desig_denovo              | 9962456                        | (G/A)       |
| 39734       | CadSNP15329    | <i>Desi</i>      | Ca_Desig_denovo              | 9962477                        | (A/G)       |
| 39735       | CadSNP15330    | <i>Desi</i>      | Ca_Desig_denovo              | 9962990                        | (T/C)       |
| 39736       | CadSNP15331    | <i>Desi</i>      | Ca_Desig_denovo              | 9969754                        | (G/C)       |
| 39737       | CadSNP15332    | <i>Desi</i>      | Ca_Desig_denovo              | 9969757                        | (C/T)       |
| 39738       | CadSNP15333    | <i>Desi</i>      | Ca_Desig_denovo              | 9971191                        | (T/A)       |
| 39739       | CadSNP15334    | <i>Desi</i>      | Ca_Desig_denovo              | 9971206                        | (T/C)       |
| 39740       | CadSNP15335    | <i>Desi</i>      | Ca_Desig_denovo              | 9973334                        | (C/G)       |
| 39741       | CadSNP15336    | <i>Desi</i>      | Ca_Desig_denovo              | 9973409                        | (G/C)       |
| 39742       | CadSNP15337    | <i>Desi</i>      | Ca_Desig_denovo              | 9977989                        | (T/C)       |
| 39743       | CadSNP15338    | <i>Desi</i>      | Ca_Desig_denovo              | 9981979                        | (G/A)       |
| 39744       | CadSNP15339    | <i>Desi</i>      | Ca_Desig_denovo              | 9985137                        | (C/T)       |
| 39745       | CadSNP15340    | <i>Desi</i>      | Ca_Desig_denovo              | 9985139                        | (C/T)       |
| 39746       | CadSNP15341    | <i>Desi</i>      | Ca_Desig_denovo              | 9988836                        | (T/C)       |
| 39747       | CadSNP15342    | <i>Desi</i>      | Ca_Desig_denovo              | 9997408                        | (G/T)       |



| <b>S.N.</b> | <b>SNP IDs</b> | <b>Cultivars</b> | <b>Chromosomes/scaffolds</b> | <b>Physical positions (bp)</b> | <b>SNPs</b> |
|-------------|----------------|------------------|------------------------------|--------------------------------|-------------|
| 39748       | CadSNP15343    | <i>Desi</i>      | Ca_Desig_denovo              | 10007242                       | (T/G)       |
| 39749       | CadSNP15344    | <i>Desi</i>      | Ca_Desig_denovo              | 10010080                       | (C/T)       |
| 39750       | CadSNP15345    | <i>Desi</i>      | Ca_Desig_denovo              | 10010116                       | (A/C)       |
| 39751       | CadSNP15346    | <i>Desi</i>      | Ca_Desig_denovo              | 10019703                       | (T/G)       |
| 39752       | CadSNP15347    | <i>Desi</i>      | Ca_Desig_denovo              | 10029777                       | (G/C)       |
| 39753       | CadSNP15348    | <i>Desi</i>      | Ca_Desig_denovo              | 10029839                       | (T/C)       |
| 39754       | CadSNP15349    | <i>Desi</i>      | Ca_Desig_denovo              | 10033567                       | (C/T)       |
| 39755       | CadSNP15350    | <i>Desi</i>      | Ca_Desig_denovo              | 10034387                       | (G/A)       |
| 39756       | CadSNP15351    | <i>Desi</i>      | Ca_Desig_denovo              | 10041552                       | (G/A)       |
| 39757       | CadSNP15352    | <i>Desi</i>      | Ca_Desig_denovo              | 10044067                       | (G/A)       |
| 39758       | CadSNP15353    | <i>Desi</i>      | Ca_Desig_denovo              | 10044068                       | (T/A)       |
| 39759       | CadSNP15354    | <i>Desi</i>      | Ca_Desig_denovo              | 10048226                       | (T/C)       |
| 39760       | CadSNP15355    | <i>Desi</i>      | Ca_Desig_denovo              | 10048672                       | (G/A)       |
| 39761       | CadSNP15356    | <i>Desi</i>      | Ca_Desig_denovo              | 10048738                       | (C/G)       |
| 39762       | CadSNP15357    | <i>Desi</i>      | Ca_Desig_denovo              | 10051507                       | (A/G)       |
| 39763       | CadSNP15358    | <i>Desi</i>      | Ca_Desig_denovo              | 10051531                       | (C/T)       |
| 39764       | CadSNP15359    | <i>Desi</i>      | Ca_Desig_denovo              | 10054939                       | (G/C)       |
| 39765       | CadSNP15360    | <i>Desi</i>      | Ca_Desig_denovo              | 10056683                       | (A/G)       |
| 39766       | CadSNP15361    | <i>Desi</i>      | Ca_Desig_denovo              | 10057874                       | (G/A)       |
| 39767       | CadSNP15362    | <i>Desi</i>      | Ca_Desig_denovo              | 10059269                       | (C/T)       |
| 39768       | CadSNP15363    | <i>Desi</i>      | Ca_Desig_denovo              | 10059478                       | (A/G)       |
| 39769       | CadSNP15364    | <i>Desi</i>      | Ca_Desig_denovo              | 10059528                       | (G/C)       |
| 39770       | CadSNP15365    | <i>Desi</i>      | Ca_Desig_denovo              | 10060779                       | (A/G)       |
| 39771       | CadSNP15366    | <i>Desi</i>      | Ca_Desig_denovo              | 10062521                       | (G/A)       |
| 39772       | CadSNP15367    | <i>Desi</i>      | Ca_Desig_denovo              | 10062580                       | (T/C)       |
| 39773       | CadSNP15368    | <i>Desi</i>      | Ca_Desig_denovo              | 10067482                       | (G/T)       |
| 39774       | CadSNP15369    | <i>Desi</i>      | Ca_Desig_denovo              | 10067485                       | (T/C)       |
| 39775       | CadSNP15370    | <i>Desi</i>      | Ca_Desig_denovo              | 10067746                       | (G/A)       |
| 39776       | CadSNP15371    | <i>Desi</i>      | Ca_Desig_denovo              | 10070151                       | (T/C)       |
| 39777       | CadSNP15372    | <i>Desi</i>      | Ca_Desig_denovo              | 10070331                       | (G/T)       |
| 39778       | CadSNP15373    | <i>Desi</i>      | Ca_Desig_denovo              | 10070332                       | (G/T)       |
| 39779       | CadSNP15374    | <i>Desi</i>      | Ca_Desig_denovo              | 10070848                       | (G/T)       |
| 39780       | CadSNP15375    | <i>Desi</i>      | Ca_Desig_denovo              | 10071655                       | (T/G)       |
| 39781       | CadSNP15376    | <i>Desi</i>      | Ca_Desig_denovo              | 10071680                       | (T/G)       |
| 39782       | CadSNP15377    | <i>Desi</i>      | Ca_Desig_denovo              | 10072410                       | (T/C)       |
| 39783       | CadSNP15378    | <i>Desi</i>      | Ca_Desig_denovo              | 10074989                       | (T/G)       |
| 39784       | CadSNP15379    | <i>Desi</i>      | Ca_Desig_denovo              | 10078442                       | (T/C)       |
| 39785       | CadSNP15380    | <i>Desi</i>      | Ca_Desig_denovo              | 10078499                       | (C/T)       |

| <b>S.N.</b> | <b>SNP IDs</b> | <b>Cultivars</b> | <b>Chromosomes/scaffolds</b> | <b>Physical positions (bp)</b> | <b>SNPs</b> |
|-------------|----------------|------------------|------------------------------|--------------------------------|-------------|
| 39786       | CadSNP15381    | <i>Desi</i>      | Ca_Desig_denovo              | 10088010                       | (G/C)       |
| 39787       | CadSNP15382    | <i>Desi</i>      | Ca_Desig_denovo              | 10088082                       | (A/C)       |
| 39788       | CadSNP15383    | <i>Desi</i>      | Ca_Desig_denovo              | 10089474                       | (G/T)       |
| 39789       | CadSNP15384    | <i>Desi</i>      | Ca_Desig_denovo              | 10092804                       | (A/G)       |
| 39790       | CadSNP15385    | <i>Desi</i>      | Ca_Desig_denovo              | 10094075                       | (G/T)       |
| 39791       | CadSNP15386    | <i>Desi</i>      | Ca_Desig_denovo              | 10096708                       | (A/G)       |
| 39792       | CadSNP15387    | <i>Desi</i>      | Ca_Desig_denovo              | 10099474                       | (C/A)       |
| 39793       | CadSNP15388    | <i>Desi</i>      | Ca_Desig_denovo              | 10099489                       | (A/G)       |
| 39794       | CadSNP15389    | <i>Desi</i>      | Ca_Desig_denovo              | 10103135                       | (C/T)       |
| 39795       | CadSNP15390    | <i>Desi</i>      | Ca_Desig_denovo              | 10116397                       | (A/G)       |
| 39796       | CadSNP15391    | <i>Desi</i>      | Ca_Desig_denovo              | 10121136                       | (A/G)       |
| 39797       | CadSNP15392    | <i>Desi</i>      | Ca_Desig_denovo              | 10125859                       | (T/C)       |
| 39798       | CadSNP15393    | <i>Desi</i>      | Ca_Desig_denovo              | 10141229                       | (T/G)       |
| 39799       | CadSNP15394    | <i>Desi</i>      | Ca_Desig_denovo              | 10141311                       | (G/C)       |
| 39800       | CadSNP15395    | <i>Desi</i>      | Ca_Desig_denovo              | 10141312                       | (G/C)       |
| 39801       | CadSNP15396    | <i>Desi</i>      | Ca_Desig_denovo              | 10144616                       | (C/G)       |
| 39802       | CadSNP15397    | <i>Desi</i>      | Ca_Desig_denovo              | 10145481                       | (C/T)       |
| 39803       | CadSNP15398    | <i>Desi</i>      | Ca_Desig_denovo              | 10145490                       | (T/A)       |
| 39804       | CadSNP15399    | <i>Desi</i>      | Ca_Desig_denovo              | 10145590                       | (C/A)       |
| 39805       | CadSNP15400    | <i>Desi</i>      | Ca_Desig_denovo              | 10150054                       | (A/G)       |
| 39806       | CadSNP15401    | <i>Desi</i>      | Ca_Desig_denovo              | 10150101                       | (G/T)       |
| 39807       | CadSNP15402    | <i>Desi</i>      | Ca_Desig_denovo              | 10163401                       | (T/A)       |
| 39808       | CadSNP15403    | <i>Desi</i>      | Ca_Desig_denovo              | 10172361                       | (G/C)       |
| 39809       | CadSNP15404    | <i>Desi</i>      | Ca_Desig_denovo              | 10177587                       | (G/C)       |
| 39810       | CadSNP15405    | <i>Desi</i>      | Ca_Desig_denovo              | 10177641                       | (G/A)       |
| 39811       | CadSNP15406    | <i>Desi</i>      | Ca_Desig_denovo              | 10178636                       | (G/A)       |
| 39812       | CadSNP15407    | <i>Desi</i>      | Ca_Desig_denovo              | 10178663                       | (A/C)       |
| 39813       | CadSNP15408    | <i>Desi</i>      | Ca_Desig_denovo              | 10179644                       | (A/G)       |
| 39814       | CadSNP15409    | <i>Desi</i>      | Ca_Desig_denovo              | 10186517                       | (A/G)       |
| 39815       | CadSNP15410    | <i>Desi</i>      | Ca_Desig_denovo              | 10186523                       | (A/C)       |
| 39816       | CadSNP15411    | <i>Desi</i>      | Ca_Desig_denovo              | 10191198                       | (T/G)       |
| 39817       | CadSNP15412    | <i>Desi</i>      | Ca_Desig_denovo              | 10191217                       | (C/A)       |
| 39818       | CadSNP15413    | <i>Desi</i>      | Ca_Desig_denovo              | 10194040                       | (G/A)       |
| 39819       | CadSNP15414    | <i>Desi</i>      | Ca_Desig_denovo              | 10195782                       | (A/G)       |
| 39820       | CadSNP15415    | <i>Desi</i>      | Ca_Desig_denovo              | 10195860                       | (T/C)       |
| 39821       | CadSNP15416    | <i>Desi</i>      | Ca_Desig_denovo              | 10199189                       | (A/C)       |
| 39822       | CadSNP15417    | <i>Desi</i>      | Ca_Desig_denovo              | 10205391                       | (A/G)       |
| 39823       | CadSNP15418    | <i>Desi</i>      | Ca_Desig_denovo              | 10209005                       | (C/T)       |

| <b>S.N.</b> | <b>SNP IDs</b> | <b>Cultivars</b> | <b>Chromosomes/scaffolds</b> | <b>Physical positions (bp)</b> | <b>SNPs</b> |
|-------------|----------------|------------------|------------------------------|--------------------------------|-------------|
| 39824       | CadSNP15419    | <i>Desi</i>      | Ca_Desig_denovo              | 10212118                       | (T/C)       |
| 39825       | CadSNP15420    | <i>Desi</i>      | Ca_Desig_denovo              | 10215689                       | (T/G)       |
| 39826       | CadSNP15421    | <i>Desi</i>      | Ca_Desig_denovo              | 10215734                       | (C/T)       |
| 39827       | CadSNP15422    | <i>Desi</i>      | Ca_Desig_denovo              | 10219734                       | (C/T)       |
| 39828       | CadSNP15423    | <i>Desi</i>      | Ca_Desig_denovo              | 10226852                       | (T/G)       |
| 39829       | CadSNP15424    | <i>Desi</i>      | Ca_Desig_denovo              | 10226876                       | (C/G)       |
| 39830       | CadSNP15425    | <i>Desi</i>      | Ca_Desig_denovo              | 10229164                       | (A/C)       |
| 39831       | CadSNP15426    | <i>Desi</i>      | Ca_Desig_denovo              | 10233124                       | (G/C)       |
| 39832       | CadSNP15427    | <i>Desi</i>      | Ca_Desig_denovo              | 10240311                       | (C/T)       |
| 39833       | CadSNP15428    | <i>Desi</i>      | Ca_Desig_denovo              | 10242614                       | (G/A)       |
| 39834       | CadSNP15429    | <i>Desi</i>      | Ca_Desig_denovo              | 10242616                       | (T/C)       |
| 39835       | CadSNP15430    | <i>Desi</i>      | Ca_Desig_denovo              | 10245170                       | (G/C)       |
| 39836       | CadSNP15431    | <i>Desi</i>      | Ca_Desig_denovo              | 10261459                       | (G/T)       |
| 39837       | CadSNP15432    | <i>Desi</i>      | Ca_Desig_denovo              | 10261460                       | (T/C)       |
| 39838       | CadSNP15433    | <i>Desi</i>      | Ca_Desig_denovo              | 10264409                       | (A/C)       |
| 39839       | CadSNP15434    | <i>Desi</i>      | Ca_Desig_denovo              | 10264411                       | (A/G)       |
| 39840       | CadSNP15435    | <i>Desi</i>      | Ca_Desig_denovo              | 10265084                       | (G/C)       |
| 39841       | CadSNP15436    | <i>Desi</i>      | Ca_Desig_denovo              | 10266456                       | (A/C)       |
| 39842       | CadSNP15437    | <i>Desi</i>      | Ca_Desig_denovo              | 10266866                       | (T/G)       |
| 39843       | CadSNP15438    | <i>Desi</i>      | Ca_Desig_denovo              | 10269763                       | (G/C)       |
| 39844       | CadSNP15439    | <i>Desi</i>      | Ca_Desig_denovo              | 10269778                       | (G/A)       |
| 39845       | CadSNP15440    | <i>Desi</i>      | Ca_Desig_denovo              | 10273802                       | (A/C)       |
| 39846       | CadSNP15441    | <i>Desi</i>      | Ca_Desig_denovo              | 10275089                       | (A/G)       |
| 39847       | CadSNP15442    | <i>Desi</i>      | Ca_Desig_denovo              | 10278278                       | (C/G)       |
| 39848       | CadSNP15443    | <i>Desi</i>      | Ca_Desig_denovo              | 10278287                       | (G/T)       |
| 39849       | CadSNP15444    | <i>Desi</i>      | Ca_Desig_denovo              | 10278885                       | (A/G)       |
| 39850       | CadSNP15445    | <i>Desi</i>      | Ca_Desig_denovo              | 10286250                       | (G/T)       |
| 39851       | CadSNP15446    | <i>Desi</i>      | Ca_Desig_denovo              | 10290605                       | (G/A)       |
| 39852       | CadSNP15447    | <i>Desi</i>      | Ca_Desig_denovo              | 10306376                       | (T/C)       |
| 39853       | CadSNP15448    | <i>Desi</i>      | Ca_Desig_denovo              | 10314226                       | (G/A)       |
| 39854       | CadSNP15449    | <i>Desi</i>      | Ca_Desig_denovo              | 10315027                       | (T/G)       |
| 39855       | CadSNP15450    | <i>Desi</i>      | Ca_Desig_denovo              | 10315037                       | (T/C)       |
| 39856       | CadSNP15451    | <i>Desi</i>      | Ca_Desig_denovo              | 10315800                       | (A/G)       |
| 39857       | CadSNP15452    | <i>Desi</i>      | Ca_Desig_denovo              | 10317008                       | (C/A)       |
| 39858       | CadSNP15453    | <i>Desi</i>      | Ca_Desig_denovo              | 10317038                       | (G/C)       |
| 39859       | CadSNP15454    | <i>Desi</i>      | Ca_Desig_denovo              | 10321984                       | (C/T)       |
| 39860       | CadSNP15455    | <i>Desi</i>      | Ca_Desig_denovo              | 10322002                       | (A/G)       |
| 39861       | CadSNP15456    | <i>Desi</i>      | Ca_Desig_denovo              | 10323193                       | (T/C)       |

| <b>S.N.</b> | <b>SNP IDs</b> | <b>Cultivars</b> | <b>Chromosomes/scaffolds</b> | <b>Physical positions (bp)</b> | <b>SNPs</b> |
|-------------|----------------|------------------|------------------------------|--------------------------------|-------------|
| 39862       | CadSNP15457    | <i>Desi</i>      | Ca_Desig_denovo              | 10324846                       | (G/T)       |
| 39863       | CadSNP15458    | <i>Desi</i>      | Ca_Desig_denovo              | 10333070                       | (C/T)       |
| 39864       | CadSNP15459    | <i>Desi</i>      | Ca_Desig_denovo              | 10333127                       | (T/G)       |
| 39865       | CadSNP15460    | <i>Desi</i>      | Ca_Desig_denovo              | 10334626                       | (G/A)       |
| 39866       | CadSNP15461    | <i>Desi</i>      | Ca_Desig_denovo              | 10350931                       | (G/C)       |
| 39867       | CadSNP15462    | <i>Desi</i>      | Ca_Desig_denovo              | 10357156                       | (T/C)       |
| 39868       | CadSNP15463    | <i>Desi</i>      | Ca_Desig_denovo              | 10357166                       | (A/G)       |
| 39869       | CadSNP15464    | <i>Desi</i>      | Ca_Desig_denovo              | 10366017                       | (G/A)       |
| 39870       | CadSNP15465    | <i>Desi</i>      | Ca_Desig_denovo              | 10366040                       | (G/A)       |
| 39871       | CadSNP15466    | <i>Desi</i>      | Ca_Desig_denovo              | 10367417                       | (T/G)       |
| 39872       | CadSNP15467    | <i>Desi</i>      | Ca_Desig_denovo              | 10367420                       | (T/A)       |
| 39873       | CadSNP15468    | <i>Desi</i>      | Ca_Desig_denovo              | 10367521                       | (C/T)       |
| 39874       | CadSNP15469    | <i>Desi</i>      | Ca_Desig_denovo              | 10375027                       | (C/G)       |
| 39875       | CadSNP15470    | <i>Desi</i>      | Ca_Desig_denovo              | 10375081                       | (C/A)       |
| 39876       | CadSNP15471    | <i>Desi</i>      | Ca_Desig_denovo              | 10379554                       | (G/T)       |
| 39877       | CadSNP15472    | <i>Desi</i>      | Ca_Desig_denovo              | 10382743                       | (G/C)       |
| 39878       | CadSNP15473    | <i>Desi</i>      | Ca_Desig_denovo              | 10382753                       | (G/A)       |
| 39879       | CadSNP15474    | <i>Desi</i>      | Ca_Desig_denovo              | 10394356                       | (C/T)       |
| 39880       | CadSNP15475    | <i>Desi</i>      | Ca_Desig_denovo              | 10395644                       | (T/C)       |
| 39881       | CadSNP15476    | <i>Desi</i>      | Ca_Desig_denovo              | 10401346                       | (A/G)       |
| 39882       | CadSNP15477    | <i>Desi</i>      | Ca_Desig_denovo              | 10403930                       | (T/C)       |
| 39883       | CadSNP15478    | <i>Desi</i>      | Ca_Desig_denovo              | 10403939                       | (A/G)       |
| 39884       | CadSNP15479    | <i>Desi</i>      | Ca_Desig_denovo              | 10412500                       | (G/A)       |
| 39885       | CadSNP15480    | <i>Desi</i>      | Ca_Desig_denovo              | 10412554                       | (T/C)       |
| 39886       | CadSNP15481    | <i>Desi</i>      | Ca_Desig_denovo              | 10414714                       | (T/C)       |
| 39887       | CadSNP15482    | <i>Desi</i>      | Ca_Desig_denovo              | 10423562                       | (C/G)       |
| 39888       | CadSNP15483    | <i>Desi</i>      | Ca_Desig_denovo              | 10423588                       | (C/G)       |
| 39889       | CadSNP15484    | <i>Desi</i>      | Ca_Desig_denovo              | 10423595                       | (G/A)       |
| 39890       | CadSNP15485    | <i>Desi</i>      | Ca_Desig_denovo              | 10436722                       | (T/C)       |
| 39891       | CadSNP15486    | <i>Desi</i>      | Ca_Desig_denovo              | 10437508                       | (C/T)       |
| 39892       | CadSNP15487    | <i>Desi</i>      | Ca_Desig_denovo              | 10437550                       | (C/G)       |
| 39893       | CadSNP15488    | <i>Desi</i>      | Ca_Desig_denovo              | 10448001                       | (C/G)       |
| 39894       | CadSNP15489    | <i>Desi</i>      | Ca_Desig_denovo              | 10448187                       | (C/G)       |
| 39895       | CadSNP15490    | <i>Desi</i>      | Ca_Desig_denovo              | 10448214                       | (T/C)       |
| 39896       | CadSNP15491    | <i>Desi</i>      | Ca_Desig_denovo              | 10467033                       | (G/A)       |
| 39897       | CadSNP15492    | <i>Desi</i>      | Ca_Desig_denovo              | 10467069                       | (C/T)       |
| 39898       | CadSNP15493    | <i>Desi</i>      | Ca_Desig_denovo              | 10467105                       | (C/T)       |
| 39899       | CadSNP15494    | <i>Desi</i>      | Ca_Desig_denovo              | 10468318                       | (G/A)       |

| <b>S.N.</b> | <b>SNP IDs</b> | <b>Cultivars</b> | <b>Chromosomes/scaffolds</b> | <b>Physical positions (bp)</b> | <b>SNPs</b> |
|-------------|----------------|------------------|------------------------------|--------------------------------|-------------|
| 39900       | CadSNP15495    | <i>Desi</i>      | Ca_Desig_denovo              | 10468321                       | (A/G)       |
| 39901       | CadSNP15496    | <i>Desi</i>      | Ca_Desig_denovo              | 10478722                       | (C/T)       |
| 39902       | CadSNP15497    | <i>Desi</i>      | Ca_Desig_denovo              | 10478729                       | (G/T)       |
| 39903       | CadSNP15498    | <i>Desi</i>      | Ca_Desig_denovo              | 10479188                       | (A/T)       |
| 39904       | CadSNP15499    | <i>Desi</i>      | Ca_Desig_denovo              | 10483536                       | (T/G)       |
| 39905       | CadSNP15500    | <i>Desi</i>      | Ca_Desig_denovo              | 10483542                       | (G/T)       |
| 39906       | CadSNP15501    | <i>Desi</i>      | Ca_Desig_denovo              | 10486559                       | (C/A)       |
| 39907       | CadSNP15502    | <i>Desi</i>      | Ca_Desig_denovo              | 10496292                       | (T/C)       |
| 39908       | CadSNP15503    | <i>Desi</i>      | Ca_Desig_denovo              | 10496313                       | (G/A)       |
| 39909       | CadSNP15504    | <i>Desi</i>      | Ca_Desig_denovo              | 10501184                       | (C/G)       |
| 39910       | CadSNP15505    | <i>Desi</i>      | Ca_Desig_denovo              | 10501186                       | (T/G)       |
| 39911       | CadSNP15506    | <i>Desi</i>      | Ca_Desig_denovo              | 10505390                       | (G/A)       |
| 39912       | CadSNP15507    | <i>Desi</i>      | Ca_Desig_denovo              | 10506856                       | (T/G)       |
| 39913       | CadSNP15508    | <i>Desi</i>      | Ca_Desig_denovo              | 10511720                       | (G/A)       |
| 39914       | CadSNP15509    | <i>Desi</i>      | Ca_Desig_denovo              | 10513740                       | (T/G)       |
| 39915       | CadSNP15510    | <i>Desi</i>      | Ca_Desig_denovo              | 10517734                       | (C/T)       |
| 39916       | CadSNP15511    | <i>Desi</i>      | Ca_Desig_denovo              | 10517740                       | (C/G)       |
| 39917       | CadSNP15512    | <i>Desi</i>      | Ca_Desig_denovo              | 10518995                       | (C/T)       |
| 39918       | CadSNP15513    | <i>Desi</i>      | Ca_Desig_denovo              | 10519086                       | (T/C)       |
| 39919       | CadSNP15514    | <i>Desi</i>      | Ca_Desig_denovo              | 10519113                       | (G/A)       |
| 39920       | CadSNP15515    | <i>Desi</i>      | Ca_Desig_denovo              | 10530017                       | (A/C)       |
| 39921       | CadSNP15516    | <i>Desi</i>      | Ca_Desig_denovo              | 10530637                       | (C/T)       |
| 39922       | CadSNP15517    | <i>Desi</i>      | Ca_Desig_denovo              | 10530658                       | (T/C)       |
| 39923       | CadSNP15518    | <i>Desi</i>      | Ca_Desig_denovo              | 10533404                       | (T/C)       |
| 39924       | CadSNP15519    | <i>Desi</i>      | Ca_Desig_denovo              | 10533704                       | (T/C)       |
| 39925       | CadSNP15520    | <i>Desi</i>      | Ca_Desig_denovo              | 10535026                       | (A/G)       |
| 39926       | CadSNP15521    | <i>Desi</i>      | Ca_Desig_denovo              | 10535048                       | (T/A)       |
| 39927       | CadSNP15522    | <i>Desi</i>      | Ca_Desig_denovo              | 10535105                       | (A/T)       |
| 39928       | CadSNP15523    | <i>Desi</i>      | Ca_Desig_denovo              | 10542888                       | (T/C)       |
| 39929       | CadSNP15524    | <i>Desi</i>      | Ca_Desig_denovo              | 10543248                       | (A/G)       |
| 39930       | CadSNP15525    | <i>Desi</i>      | Ca_Desig_denovo              | 10543867                       | (G/T)       |
| 39931       | CadSNP15526    | <i>Desi</i>      | Ca_Desig_denovo              | 10545557                       | (T/C)       |
| 39932       | CadSNP15527    | <i>Desi</i>      | Ca_Desig_denovo              | 10554780                       | (G/A)       |
| 39933       | CadSNP15528    | <i>Desi</i>      | Ca_Desig_denovo              | 10555811                       | (A/G)       |
| 39934       | CadSNP15529    | <i>Desi</i>      | Ca_Desig_denovo              | 10560122                       | (A/T)       |
| 39935       | CadSNP15530    | <i>Desi</i>      | Ca_Desig_denovo              | 10560138                       | (C/G)       |
| 39936       | CadSNP15531    | <i>Desi</i>      | Ca_Desig_denovo              | 10560199                       | (T/C)       |
| 39937       | CadSNP15532    | <i>Desi</i>      | Ca_Desig_denovo              | 10564999                       | (T/G)       |

| <b>S.N.</b> | <b>SNP IDs</b> | <b>Cultivars</b> | <b>Chromosomes/scaffolds</b> | <b>Physical positions (bp)</b> | <b>SNPs</b> |
|-------------|----------------|------------------|------------------------------|--------------------------------|-------------|
| 39938       | CadSNP15533    | <i>Desi</i>      | Ca_Desig_denovo              | 10583340                       | (G/C)       |
| 39939       | CadSNP15534    | <i>Desi</i>      | Ca_Desig_denovo              | 10583396                       | (G/A)       |
| 39940       | CadSNP15535    | <i>Desi</i>      | Ca_Desig_denovo              | 10594753                       | (C/G)       |
| 39941       | CadSNP15536    | <i>Desi</i>      | Ca_Desig_denovo              | 10594756                       | (T/C)       |
| 39942       | CadSNP15537    | <i>Desi</i>      | Ca_Desig_denovo              | 10596302                       | (A/C)       |
| 39943       | CadSNP15538    | <i>Desi</i>      | Ca_Desig_denovo              | 10603975                       | (C/T)       |
| 39944       | CadSNP15539    | <i>Desi</i>      | Ca_Desig_denovo              | 10608280                       | (C/G)       |
| 39945       | CadSNP15540    | <i>Desi</i>      | Ca_Desig_denovo              | 10611593                       | (G/A)       |
| 39946       | CadSNP15541    | <i>Desi</i>      | Ca_Desig_denovo              | 10611825                       | (A/G)       |
| 39947       | CadSNP15542    | <i>Desi</i>      | Ca_Desig_denovo              | 10611826                       | (T/C)       |
| 39948       | CadSNP15543    | <i>Desi</i>      | Ca_Desig_denovo              | 10617038                       | (T/G)       |
| 39949       | CadSNP15544    | <i>Desi</i>      | Ca_Desig_denovo              | 10617039                       | (C/A)       |
| 39950       | CadSNP15545    | <i>Desi</i>      | Ca_Desig_denovo              | 10622416                       | (G/T)       |
| 39951       | CadSNP15546    | <i>Desi</i>      | Ca_Desig_denovo              | 10627660                       | (C/T)       |
| 39952       | CadSNP15547    | <i>Desi</i>      | Ca_Desig_denovo              | 10631990                       | (C/T)       |
| 39953       | CadSNP15548    | <i>Desi</i>      | Ca_Desig_denovo              | 10632932                       | (C/G)       |
| 39954       | CadSNP15549    | <i>Desi</i>      | Ca_Desig_denovo              | 10632947                       | (C/T)       |
| 39955       | CadSNP15550    | <i>Desi</i>      | Ca_Desig_denovo              | 10641123                       | (C/T)       |
| 39956       | CadSNP15551    | <i>Desi</i>      | Ca_Desig_denovo              | 10641393                       | (C/G)       |
| 39957       | CadSNP15552    | <i>Desi</i>      | Ca_Desig_denovo              | 10641396                       | (T/C)       |
| 39958       | CadSNP15553    | <i>Desi</i>      | Ca_Desig_denovo              | 10648872                       | (A/C)       |
| 39959       | CadSNP15554    | <i>Desi</i>      | Ca_Desig_denovo              | 10648873                       | (G/A)       |
| 39960       | CadSNP15555    | <i>Desi</i>      | Ca_Desig_denovo              | 10651462                       | (G/A)       |
| 39961       | CadSNP15556    | <i>Desi</i>      | Ca_Desig_denovo              | 10651705                       | (G/T)       |
| 39962       | CadSNP15557    | <i>Desi</i>      | Ca_Desig_denovo              | 10654654                       | (T/G)       |
| 39963       | CadSNP15558    | <i>Desi</i>      | Ca_Desig_denovo              | 10654655                       | (C/T)       |
| 39964       | CadSNP15559    | <i>Desi</i>      | Ca_Desig_denovo              | 10669127                       | (G/A)       |
| 39965       | CadSNP15560    | <i>Desi</i>      | Ca_Desig_denovo              | 10678151                       | (T/C)       |
| 39966       | CadSNP15561    | <i>Desi</i>      | Ca_Desig_denovo              | 10685389                       | (A/G)       |
| 39967       | CadSNP15562    | <i>Desi</i>      | Ca_Desig_denovo              | 10685416                       | (C/G)       |
| 39968       | CadSNP15563    | <i>Desi</i>      | Ca_Desig_denovo              | 10686556                       | (T/C)       |
| 39969       | CadSNP15564    | <i>Desi</i>      | Ca_Desig_denovo              | 10686650                       | (A/G)       |
| 39970       | CadSNP15565    | <i>Desi</i>      | Ca_Desig_denovo              | 10686655                       | (T/C)       |
| 39971       | CadSNP15566    | <i>Desi</i>      | Ca_Desig_denovo              | 10686822                       | (C/T)       |
| 39972       | CadSNP15567    | <i>Desi</i>      | Ca_Desig_denovo              | 10689478                       | (G/A)       |
| 39973       | CadSNP15568    | <i>Desi</i>      | Ca_Desig_denovo              | 10690829                       | (C/T)       |
| 39974       | CadSNP15569    | <i>Desi</i>      | Ca_Desig_denovo              | 10690858                       | (T/G)       |
| 39975       | CadSNP15570    | <i>Desi</i>      | Ca_Desig_denovo              | 10691388                       | (G/A)       |

| <b>S.N.</b> | <b>SNP IDs</b> | <b>Cultivars</b> | <b>Chromosomes/scaffolds</b> | <b>Physical positions (bp)</b> | <b>SNPs</b> |
|-------------|----------------|------------------|------------------------------|--------------------------------|-------------|
| 39976       | CadSNP15571    | <i>Desi</i>      | Ca_Desig_denovo              | 10691419                       | (C/A)       |
| 39977       | CadSNP15572    | <i>Desi</i>      | Ca_Desig_denovo              | 10693357                       | (C/T)       |
| 39978       | CadSNP15573    | <i>Desi</i>      | Ca_Desig_denovo              | 10693387                       | (T/C)       |
| 39979       | CadSNP15574    | <i>Desi</i>      | Ca_Desig_denovo              | 10693852                       | (A/G)       |
| 39980       | CadSNP15575    | <i>Desi</i>      | Ca_Desig_denovo              | 10716232                       | (C/G)       |
| 39981       | CadSNP15576    | <i>Desi</i>      | Ca_Desig_denovo              | 10720863                       | (G/C)       |
| 39982       | CadSNP15577    | <i>Desi</i>      | Ca_Desig_denovo              | 10720873                       | (T/C)       |
| 39983       | CadSNP15578    | <i>Desi</i>      | Ca_Desig_denovo              | 10721069                       | (G/A)       |
| 39984       | CadSNP15579    | <i>Desi</i>      | Ca_Desig_denovo              | 10721525                       | (A/G)       |
| 39985       | CadSNP15580    | <i>Desi</i>      | Ca_Desig_denovo              | 10731019                       | (G/A)       |
| 39986       | CadSNP15581    | <i>Desi</i>      | Ca_Desig_denovo              | 10731025                       | (A/G)       |
| 39987       | CadSNP15582    | <i>Desi</i>      | Ca_Desig_denovo              | 10740100                       | (A/G)       |
| 39988       | CadSNP15583    | <i>Desi</i>      | Ca_Desig_denovo              | 10741977                       | (C/T)       |
| 39989       | CadSNP15584    | <i>Desi</i>      | Ca_Desig_denovo              | 10741997                       | (A/G)       |
| 39990       | CadSNP15585    | <i>Desi</i>      | Ca_Desig_denovo              | 10744112                       | (C/T)       |
| 39991       | CadSNP15586    | <i>Desi</i>      | Ca_Desig_denovo              | 10744113                       | (T/C)       |
| 39992       | CadSNP15587    | <i>Desi</i>      | Ca_Desig_denovo              | 10745216                       | (T/G)       |
| 39993       | CadSNP15588    | <i>Desi</i>      | Ca_Desig_denovo              | 10745722                       | (C/T)       |
| 39994       | CadSNP15589    | <i>Desi</i>      | Ca_Desig_denovo              | 10747276                       | (A/C)       |
| 39995       | CadSNP15590    | <i>Desi</i>      | Ca_Desig_denovo              | 10752592                       | (C/T)       |
| 39996       | CadSNP15591    | <i>Desi</i>      | Ca_Desig_denovo              | 10752604                       | (G/A)       |
| 39997       | CadSNP15592    | <i>Desi</i>      | Ca_Desig_denovo              | 10764087                       | (A/G)       |
| 39998       | CadSNP15593    | <i>Desi</i>      | Ca_Desig_denovo              | 10766260                       | (C/T)       |
| 39999       | CadSNP15594    | <i>Desi</i>      | Ca_Desig_denovo              | 10768456                       | (C/A)       |
| 40000       | CadSNP15595    | <i>Desi</i>      | Ca_Desig_denovo              | 10768467                       | (A/C)       |
| 40001       | CadSNP15596    | <i>Desi</i>      | Ca_Desig_denovo              | 10768468                       | (G/C)       |
| 40002       | CadSNP15597    | <i>Desi</i>      | Ca_Desig_denovo              | 10773207                       | (T/G)       |
| 40003       | CadSNP15598    | <i>Desi</i>      | Ca_Desig_denovo              | 10774160                       | (C/T)       |
| 40004       | CadSNP15599    | <i>Desi</i>      | Ca_Desig_denovo              | 10775704                       | (C/A)       |
| 40005       | CadSNP15600    | <i>Desi</i>      | Ca_Desig_denovo              | 10784384                       | (T/C)       |
| 40006       | CadSNP15601    | <i>Desi</i>      | Ca_Desig_denovo              | 10784767                       | (T/G)       |
| 40007       | CadSNP15602    | <i>Desi</i>      | Ca_Desig_denovo              | 10790071                       | (T/C)       |
| 40008       | CadSNP15603    | <i>Desi</i>      | Ca_Desig_denovo              | 10790080                       | (C/T)       |
| 40009       | CadSNP15604    | <i>Desi</i>      | Ca_Desig_denovo              | 10790435                       | (C/T)       |
| 40010       | CadSNP15605    | <i>Desi</i>      | Ca_Desig_denovo              | 10790511                       | (T/C)       |
| 40011       | CadSNP15606    | <i>Desi</i>      | Ca_Desig_denovo              | 10793633                       | (A/G)       |
| 40012       | CadSNP15607    | <i>Desi</i>      | Ca_Desig_denovo              | 10800870                       | (G/T)       |
| 40013       | CadSNP15608    | <i>Desi</i>      | Ca_Desig_denovo              | 10800888                       | (G/C)       |

| <b>S.N.</b> | <b>SNP IDs</b> | <b>Cultivars</b> | <b>Chromosomes/scaffolds</b> | <b>Physical positions (bp)</b> | <b>SNPs</b> |
|-------------|----------------|------------------|------------------------------|--------------------------------|-------------|
| 40014       | CadSNP15609    | <i>Desi</i>      | Ca_Desig_denovo              | 10803002                       | (C/A)       |
| 40015       | CadSNP15610    | <i>Desi</i>      | Ca_Desig_denovo              | 10804202                       | (C/T)       |
| 40016       | CadSNP15611    | <i>Desi</i>      | Ca_Desig_denovo              | 10804226                       | (G/C)       |
| 40017       | CadSNP15612    | <i>Desi</i>      | Ca_Desig_denovo              | 10809154                       | (C/T)       |
| 40018       | CadSNP15613    | <i>Desi</i>      | Ca_Desig_denovo              | 10809166                       | (T/G)       |
| 40019       | CadSNP15614    | <i>Desi</i>      | Ca_Desig_denovo              | 10816777                       | (A/G)       |
| 40020       | CadSNP15615    | <i>Desi</i>      | Ca_Desig_denovo              | 10816813                       | (C/G)       |
| 40021       | CadSNP15616    | <i>Desi</i>      | Ca_Desig_denovo              | 10817039                       | (G/C)       |
| 40022       | CadSNP15617    | <i>Desi</i>      | Ca_Desig_denovo              | 10817058                       | (G/A)       |
| 40023       | CadSNP15618    | <i>Desi</i>      | Ca_Desig_denovo              | 10818860                       | (A/G)       |
| 40024       | CadSNP15619    | <i>Desi</i>      | Ca_Desig_denovo              | 10820395                       | (T/G)       |
| 40025       | CadSNP15620    | <i>Desi</i>      | Ca_Desig_denovo              | 10825620                       | (G/A)       |
| 40026       | CadSNP15621    | <i>Desi</i>      | Ca_Desig_denovo              | 10825646                       | (G/T)       |
| 40027       | CadSNP15622    | <i>Desi</i>      | Ca_Desig_denovo              | 10827227                       | (T/C)       |
| 40028       | CadSNP15623    | <i>Desi</i>      | Ca_Desig_denovo              | 10827229                       | (G/A)       |
| 40029       | CadSNP15624    | <i>Desi</i>      | Ca_Desig_denovo              | 10827968                       | (C/G)       |
| 40030       | CadSNP15625    | <i>Desi</i>      | Ca_Desig_denovo              | 10836421                       | (G/C)       |
| 40031       | CadSNP15626    | <i>Desi</i>      | Ca_Desig_denovo              | 10842772                       | (C/T)       |
| 40032       | CadSNP15627    | <i>Desi</i>      | Ca_Desig_denovo              | 10844560                       | (G/A)       |
| 40033       | CadSNP15628    | <i>Desi</i>      | Ca_Desig_denovo              | 10844635                       | (A/G)       |
| 40034       | CadSNP15629    | <i>Desi</i>      | Ca_Desig_denovo              | 10848979                       | (G/A)       |
| 40035       | CadSNP15630    | <i>Desi</i>      | Ca_Desig_denovo              | 10852709                       | (G/C)       |
| 40036       | CadSNP15631    | <i>Desi</i>      | Ca_Desig_denovo              | 10869954                       | (G/A)       |
| 40037       | CadSNP15632    | <i>Desi</i>      | Ca_Desig_denovo              | 10869972                       | (G/A)       |
| 40038       | CadSNP15633    | <i>Desi</i>      | Ca_Desig_denovo              | 10875514                       | (A/C)       |
| 40039       | CadSNP15634    | <i>Desi</i>      | Ca_Desig_denovo              | 10876771                       | (T/A)       |
| 40040       | CadSNP15635    | <i>Desi</i>      | Ca_Desig_denovo              | 10877125                       | (G/C)       |
| 40041       | CadSNP15636    | <i>Desi</i>      | Ca_Desig_denovo              | 10877970                       | (C/T)       |
| 40042       | CadSNP15637    | <i>Desi</i>      | Ca_Desig_denovo              | 10879354                       | (A/G)       |
| 40043       | CadSNP15638    | <i>Desi</i>      | Ca_Desig_denovo              | 10879398                       | (G/A)       |
| 40044       | CadSNP15639    | <i>Desi</i>      | Ca_Desig_denovo              | 10881014                       | (A/G)       |
| 40045       | CadSNP15640    | <i>Desi</i>      | Ca_Desig_denovo              | 10881035                       | (G/A)       |
| 40046       | CadSNP15641    | <i>Desi</i>      | Ca_Desig_denovo              | 10884391                       | (G/A)       |
| 40047       | CadSNP15642    | <i>Desi</i>      | Ca_Desig_denovo              | 10890403                       | (A/G)       |
| 40048       | CadSNP15643    | <i>Desi</i>      | Ca_Desig_denovo              | 10905255                       | (G/A)       |
| 40049       | CadSNP15644    | <i>Desi</i>      | Ca_Desig_denovo              | 10905374                       | (C/G)       |
| 40050       | CadSNP15645    | <i>Desi</i>      | Ca_Desig_denovo              | 10905431                       | (G/A)       |
| 40051       | CadSNP15646    | <i>Desi</i>      | Ca_Desig_denovo              | 10911236                       | (C/A)       |



| <b>S.N.</b> | <b>SNP IDs</b> | <b>Cultivars</b> | <b>Chromosomes/scaffolds</b> | <b>Physical positions (bp)</b> | <b>SNPs</b> |
|-------------|----------------|------------------|------------------------------|--------------------------------|-------------|
| 40052       | CadSNP15647    | <i>Desi</i>      | Ca_Desig_denovo              | 10912304                       | (T/C)       |
| 40053       | CadSNP15648    | <i>Desi</i>      | Ca_Desig_denovo              | 10912397                       | (G/T)       |
| 40054       | CadSNP15649    | <i>Desi</i>      | Ca_Desig_denovo              | 10914288                       | (T/G)       |
| 40055       | CadSNP15650    | <i>Desi</i>      | Ca_Desig_denovo              | 10914631                       | (A/G)       |
| 40056       | CadSNP15651    | <i>Desi</i>      | Ca_Desig_denovo              | 10915619                       | (C/T)       |
| 40057       | CadSNP15652    | <i>Desi</i>      | Ca_Desig_denovo              | 10915625                       | (A/G)       |
| 40058       | CadSNP15653    | <i>Desi</i>      | Ca_Desig_denovo              | 10917585                       | (A/G)       |
| 40059       | CadSNP15654    | <i>Desi</i>      | Ca_Desig_denovo              | 10918771                       | (A/T)       |
| 40060       | CadSNP15655    | <i>Desi</i>      | Ca_Desig_denovo              | 10923159                       | (C/A)       |
| 40061       | CadSNP15656    | <i>Desi</i>      | Ca_Desig_denovo              | 10925749                       | (A/G)       |
| 40062       | CadSNP15657    | <i>Desi</i>      | Ca_Desig_denovo              | 10925965                       | (A/C)       |
| 40063       | CadSNP15658    | <i>Desi</i>      | Ca_Desig_denovo              | 10934873                       | (A/G)       |
| 40064       | CadSNP15659    | <i>Desi</i>      | Ca_Desig_denovo              | 10934900                       | (C/A)       |
| 40065       | CadSNP15660    | <i>Desi</i>      | Ca_Desig_denovo              | 10940309                       | (G/A)       |
| 40066       | CadSNP15661    | <i>Desi</i>      | Ca_Desig_denovo              | 10941621                       | (C/T)       |
| 40067       | CadSNP15662    | <i>Desi</i>      | Ca_Desig_denovo              | 10944323                       | (A/T)       |
| 40068       | CadSNP15663    | <i>Desi</i>      | Ca_Desig_denovo              | 10944667                       | (T/C)       |
| 40069       | CadSNP15664    | <i>Desi</i>      | Ca_Desig_denovo              | 10944865                       | (A/T)       |
| 40070       | CadSNP15665    | <i>Desi</i>      | Ca_Desig_denovo              | 10945177                       | (C/A)       |
| 40071       | CadSNP15666    | <i>Desi</i>      | Ca_Desig_denovo              | 10945246                       | (C/G)       |
| 40072       | CadSNP15667    | <i>Desi</i>      | Ca_Desig_denovo              | 10945313                       | (A/G)       |
| 40073       | CadSNP15668    | <i>Desi</i>      | Ca_Desig_denovo              | 10945352                       | (C/T)       |
| 40074       | CadSNP15669    | <i>Desi</i>      | Ca_Desig_denovo              | 10947713                       | (G/C)       |
| 40075       | CadSNP15670    | <i>Desi</i>      | Ca_Desig_denovo              | 10951500                       | (C/G)       |
| 40076       | CadSNP15671    | <i>Desi</i>      | Ca_Desig_denovo              | 10951527                       | (C/T)       |
| 40077       | CadSNP15672    | <i>Desi</i>      | Ca_Desig_denovo              | 10958759                       | (C/G)       |
| 40078       | CadSNP15673    | <i>Desi</i>      | Ca_Desig_denovo              | 10958768                       | (G/T)       |
| 40079       | CadSNP15674    | <i>Desi</i>      | Ca_Desig_denovo              | 10961173                       | (G/C)       |
| 40080       | CadSNP15675    | <i>Desi</i>      | Ca_Desig_denovo              | 10961244                       | (A/G)       |
| 40081       | CadSNP15676    | <i>Desi</i>      | Ca_Desig_denovo              | 10964247                       | (T/C)       |
| 40082       | CadSNP15677    | <i>Desi</i>      | Ca_Desig_denovo              | 10964250                       | (A/G)       |
| 40083       | CadSNP15678    | <i>Desi</i>      | Ca_Desig_denovo              | 10964707                       | (A/G)       |
| 40084       | CadSNP15679    | <i>Desi</i>      | Ca_Desig_denovo              | 10966173                       | (A/G)       |
| 40085       | CadSNP15680    | <i>Desi</i>      | Ca_Desig_denovo              | 10967510                       | (A/G)       |
| 40086       | CadSNP15681    | <i>Desi</i>      | Ca_Desig_denovo              | 10967582                       | (C/G)       |
| 40087       | CadSNP15682    | <i>Desi</i>      | Ca_Desig_denovo              | 10970764                       | (A/G)       |
| 40088       | CadSNP15683    | <i>Desi</i>      | Ca_Desig_denovo              | 10970770                       | (C/G)       |
| 40089       | CadSNP15684    | <i>Desi</i>      | Ca_Desig_denovo              | 10991314                       | (A/G)       |

| <b>S.N.</b> | <b>SNP IDs</b> | <b>Cultivars</b> | <b>Chromosomes/scaffolds</b> | <b>Physical positions (bp)</b> | <b>SNPs</b> |
|-------------|----------------|------------------|------------------------------|--------------------------------|-------------|
| 40090       | CadSNP15685    | <i>Desi</i>      | Ca_Desig_denovo              | 10991338                       | (T/C)       |
| 40091       | CadSNP15686    | <i>Desi</i>      | Ca_Desig_denovo              | 11002604                       | (G/A)       |
| 40092       | CadSNP15687    | <i>Desi</i>      | Ca_Desig_denovo              | 11003179                       | (C/T)       |
| 40093       | CadSNP15688    | <i>Desi</i>      | Ca_Desig_denovo              | 11010775                       | (A/C)       |
| 40094       | CadSNP15689    | <i>Desi</i>      | Ca_Desig_denovo              | 11010780                       | (G/A)       |
| 40095       | CadSNP15690    | <i>Desi</i>      | Ca_Desig_denovo              | 11015701                       | (A/C)       |
| 40096       | CadSNP15691    | <i>Desi</i>      | Ca_Desig_denovo              | 11015756                       | (A/G)       |
| 40097       | CadSNP15692    | <i>Desi</i>      | Ca_Desig_denovo              | 11016732                       | (C/G)       |
| 40098       | CadSNP15693    | <i>Desi</i>      | Ca_Desig_denovo              | 11022984                       | (G/C)       |
| 40099       | CadSNP15694    | <i>Desi</i>      | Ca_Desig_denovo              | 11022988                       | (A/G)       |
| 40100       | CadSNP15695    | <i>Desi</i>      | Ca_Desig_denovo              | 11022989                       | (A/G)       |
| 40101       | CadSNP15696    | <i>Desi</i>      | Ca_Desig_denovo              | 11023117                       | (A/G)       |
| 40102       | CadSNP15697    | <i>Desi</i>      | Ca_Desig_denovo              | 11023475                       | (T/C)       |
| 40103       | CadSNP15698    | <i>Desi</i>      | Ca_Desig_denovo              | 11024438                       | (G/T)       |
| 40104       | CadSNP15699    | <i>Desi</i>      | Ca_Desig_denovo              | 11025076                       | (T/G)       |
| 40105       | CadSNP15700    | <i>Desi</i>      | Ca_Desig_denovo              | 11025146                       | (C/G)       |
| 40106       | CadSNP15701    | <i>Desi</i>      | Ca_Desig_denovo              | 11034686                       | (A/G)       |
| 40107       | CadSNP15702    | <i>Desi</i>      | Ca_Desig_denovo              | 11034700                       | (A/G)       |
| 40108       | CadSNP15703    | <i>Desi</i>      | Ca_Desig_denovo              | 11034954                       | (C/A)       |
| 40109       | CadSNP15704    | <i>Desi</i>      | Ca_Desig_denovo              | 11034978                       | (A/G)       |
| 40110       | CadSNP15705    | <i>Desi</i>      | Ca_Desig_denovo              | 11035006                       | (C/T)       |
| 40111       | CadSNP15706    | <i>Desi</i>      | Ca_Desig_denovo              | 11036710                       | (C/G)       |
| 40112       | CadSNP15707    | <i>Desi</i>      | Ca_Desig_denovo              | 11036769                       | (T/G)       |
| 40113       | CadSNP15708    | <i>Desi</i>      | Ca_Desig_denovo              | 11049487                       | (C/T)       |
| 40114       | CadSNP15709    | <i>Desi</i>      | Ca_Desig_denovo              | 11049505                       | (G/T)       |
| 40115       | CadSNP15710    | <i>Desi</i>      | Ca_Desig_denovo              | 11049529                       | (C/G)       |
| 40116       | CadSNP15711    | <i>Desi</i>      | Ca_Desig_denovo              | 11049712                       | (G/A)       |
| 40117       | CadSNP15712    | <i>Desi</i>      | Ca_Desig_denovo              | 11056972                       | (T/C)       |
| 40118       | CadSNP15713    | <i>Desi</i>      | Ca_Desig_denovo              | 11059868                       | (C/A)       |
| 40119       | CadSNP15714    | <i>Desi</i>      | Ca_Desig_denovo              | 11065456                       | (G/T)       |
| 40120       | CadSNP15715    | <i>Desi</i>      | Ca_Desig_denovo              | 11066548                       | (C/G)       |
| 40121       | CadSNP15716    | <i>Desi</i>      | Ca_Desig_denovo              | 11066575                       | (A/G)       |
| 40122       | CadSNP15717    | <i>Desi</i>      | Ca_Desig_denovo              | 11068429                       | (C/T)       |
| 40123       | CadSNP15718    | <i>Desi</i>      | Ca_Desig_denovo              | 11071390                       | (C/T)       |
| 40124       | CadSNP15719    | <i>Desi</i>      | Ca_Desig_denovo              | 11071398                       | (A/G)       |
| 40125       | CadSNP15720    | <i>Desi</i>      | Ca_Desig_denovo              | 11075104                       | (A/G)       |
| 40126       | CadSNP15721    | <i>Desi</i>      | Ca_Desig_denovo              | 11078192                       | (G/A)       |
| 40127       | CadSNP15722    | <i>Desi</i>      | Ca_Desig_denovo              | 11083520                       | (T/C)       |

| <b>S.N.</b> | <b>SNP IDs</b> | <b>Cultivars</b> | <b>Chromosomes/scaffolds</b> | <b>Physical positions (bp)</b> | <b>SNPs</b> |
|-------------|----------------|------------------|------------------------------|--------------------------------|-------------|
| 40128       | CadSNP15723    | <i>Desi</i>      | Ca_Desig_denovo              | 11090112                       | (A/G)       |
| 40129       | CadSNP15724    | <i>Desi</i>      | Ca_Desig_denovo              | 11090113                       | (A/G)       |
| 40130       | CadSNP15725    | <i>Desi</i>      | Ca_Desig_denovo              | 11095536                       | (C/G)       |
| 40131       | CadSNP15726    | <i>Desi</i>      | Ca_Desig_denovo              | 11099203                       | (G/A)       |
| 40132       | CadSNP15727    | <i>Desi</i>      | Ca_Desig_denovo              | 11099265                       | (C/A)       |
| 40133       | CadSNP15728    | <i>Desi</i>      | Ca_Desig_denovo              | 11103317                       | (A/G)       |
| 40134       | CadSNP15729    | <i>Desi</i>      | Ca_Desig_denovo              | 11105401                       | (C/T)       |
| 40135       | CadSNP15730    | <i>Desi</i>      | Ca_Desig_denovo              | 11108691                       | (A/G)       |
| 40136       | CadSNP15731    | <i>Desi</i>      | Ca_Desig_denovo              | 11112463                       | (G/A)       |
| 40137       | CadSNP15732    | <i>Desi</i>      | Ca_Desig_denovo              | 11114935                       | (T/G)       |
| 40138       | CadSNP15733    | <i>Desi</i>      | Ca_Desig_denovo              | 11114974                       | (A/G)       |
| 40139       | CadSNP15734    | <i>Desi</i>      | Ca_Desig_denovo              | 11118812                       | (A/G)       |
| 40140       | CadSNP15735    | <i>Desi</i>      | Ca_Desig_denovo              | 11118828                       | (A/C)       |
| 40141       | CadSNP15736    | <i>Desi</i>      | Ca_Desig_denovo              | 11135175                       | (A/C)       |
| 40142       | CadSNP15737    | <i>Desi</i>      | Ca_Desig_denovo              | 11149170                       | (T/C)       |
| 40143       | CadSNP15738    | <i>Desi</i>      | Ca_Desig_denovo              | 11153694                       | (C/T)       |
| 40144       | CadSNP15739    | <i>Desi</i>      | Ca_Desig_denovo              | 11154562                       | (T/C)       |
| 40145       | CadSNP15740    | <i>Desi</i>      | Ca_Desig_denovo              | 11156396                       | (T/C)       |
| 40146       | CadSNP15741    | <i>Desi</i>      | Ca_Desig_denovo              | 11156430                       | (C/T)       |
| 40147       | CadSNP15742    | <i>Desi</i>      | Ca_Desig_denovo              | 11162165                       | (G/C)       |
| 40148       | CadSNP15743    | <i>Desi</i>      | Ca_Desig_denovo              | 11162216                       | (A/G)       |
| 40149       | CadSNP15744    | <i>Desi</i>      | Ca_Desig_denovo              | 11163122                       | (T/C)       |
| 40150       | CadSNP15745    | <i>Desi</i>      | Ca_Desig_denovo              | 11163136                       | (T/C)       |
| 40151       | CadSNP15746    | <i>Desi</i>      | Ca_Desig_denovo              | 11166705                       | (C/T)       |
| 40152       | CadSNP15747    | <i>Desi</i>      | Ca_Desig_denovo              | 11170344                       | (T/G)       |
| 40153       | CadSNP15748    | <i>Desi</i>      | Ca_Desig_denovo              | 11170470                       | (A/G)       |
| 40154       | CadSNP15749    | <i>Desi</i>      | Ca_Desig_denovo              | 11174559                       | (T/A)       |
| 40155       | CadSNP15750    | <i>Desi</i>      | Ca_Desig_denovo              | 11174589                       | (C/T)       |
| 40156       | CadSNP15751    | <i>Desi</i>      | Ca_Desig_denovo              | 11180487                       | (C/A)       |
| 40157       | CadSNP15752    | <i>Desi</i>      | Ca_Desig_denovo              | 11184209                       | (C/G)       |
| 40158       | CadSNP15753    | <i>Desi</i>      | Ca_Desig_denovo              | 11184486                       | (A/C)       |
| 40159       | CadSNP15754    | <i>Desi</i>      | Ca_Desig_denovo              | 11190185                       | (C/T)       |
| 40160       | CadSNP15755    | <i>Desi</i>      | Ca_Desig_denovo              | 11190188                       | (G/T)       |
| 40161       | CadSNP15756    | <i>Desi</i>      | Ca_Desig_denovo              | 11192881                       | (C/T)       |
| 40162       | CadSNP15757    | <i>Desi</i>      | Ca_Desig_denovo              | 11198285                       | (G/A)       |
| 40163       | CadSNP15758    | <i>Desi</i>      | Ca_Desig_denovo              | 11200572                       | (T/G)       |
| 40164       | CadSNP15759    | <i>Desi</i>      | Ca_Desig_denovo              | 11203786                       | (C/T)       |
| 40165       | CadSNP15760    | <i>Desi</i>      | Ca_Desig_denovo              | 11204147                       | (G/A)       |

| <b>S.N.</b> | <b>SNP IDs</b> | <b>Cultivars</b> | <b>Chromosomes/scaffolds</b> | <b>Physical positions (bp)</b> | <b>SNPs</b> |
|-------------|----------------|------------------|------------------------------|--------------------------------|-------------|
| 40166       | CadSNP15761    | <i>Desi</i>      | Ca_Desig_denovo              | 11204165                       | (G/A)       |
| 40167       | CadSNP15762    | <i>Desi</i>      | Ca_Desig_denovo              | 11214153                       | (C/A)       |
| 40168       | CadSNP15763    | <i>Desi</i>      | Ca_Desig_denovo              | 11214198                       | (C/G)       |
| 40169       | CadSNP15764    | <i>Desi</i>      | Ca_Desig_denovo              | 11214981                       | (C/T)       |
| 40170       | CadSNP15765    | <i>Desi</i>      | Ca_Desig_denovo              | 11225286                       | (A/C)       |
| 40171       | CadSNP15766    | <i>Desi</i>      | Ca_Desig_denovo              | 11225287                       | (G/C)       |
| 40172       | CadSNP15767    | <i>Desi</i>      | Ca_Desig_denovo              | 11229038                       | (G/A)       |
| 40173       | CadSNP15768    | <i>Desi</i>      | Ca_Desig_denovo              | 11238705                       | (G/C)       |
| 40174       | CadSNP15769    | <i>Desi</i>      | Ca_Desig_denovo              | 11238735                       | (A/C)       |
| 40175       | CadSNP15770    | <i>Desi</i>      | Ca_Desig_denovo              | 11240091                       | (A/G)       |
| 40176       | CadSNP15771    | <i>Desi</i>      | Ca_Desig_denovo              | 11242459                       | (T/C)       |
| 40177       | CadSNP15772    | <i>Desi</i>      | Ca_Desig_denovo              | 11249349                       | (G/C)       |
| 40178       | CadSNP15773    | <i>Desi</i>      | Ca_Desig_denovo              | 11256760                       | (A/T)       |
| 40179       | CadSNP15774    | <i>Desi</i>      | Ca_Desig_denovo              | 11261842                       | (C/T)       |
| 40180       | CadSNP15775    | <i>Desi</i>      | Ca_Desig_denovo              | 11264471                       | (T/A)       |
| 40181       | CadSNP15776    | <i>Desi</i>      | Ca_Desig_denovo              | 11270219                       | (A/G)       |
| 40182       | CadSNP15777    | <i>Desi</i>      | Ca_Desig_denovo              | 11270222                       | (G/C)       |
| 40183       | CadSNP15778    | <i>Desi</i>      | Ca_Desig_denovo              | 11274531                       | (G/C)       |
| 40184       | CadSNP15779    | <i>Desi</i>      | Ca_Desig_denovo              | 11276384                       | (G/T)       |
| 40185       | CadSNP15780    | <i>Desi</i>      | Ca_Desig_denovo              | 11279348                       | (A/G)       |
| 40186       | CadSNP15781    | <i>Desi</i>      | Ca_Desig_denovo              | 11279350                       | (C/G)       |
| 40187       | CadSNP15782    | <i>Desi</i>      | Ca_Desig_denovo              | 11284061                       | (A/C)       |
| 40188       | CadSNP15783    | <i>Desi</i>      | Ca_Desig_denovo              | 11287348                       | (A/G)       |
| 40189       | CadSNP15784    | <i>Desi</i>      | Ca_Desig_denovo              | 11288273                       | (T/G)       |
| 40190       | CadSNP15785    | <i>Desi</i>      | Ca_Desig_denovo              | 11294029                       | (T/C)       |
| 40191       | CadSNP15786    | <i>Desi</i>      | Ca_Desig_denovo              | 11294041                       | (C/G)       |
| 40192       | CadSNP15787    | <i>Desi</i>      | Ca_Desig_denovo              | 11294585                       | (C/T)       |
| 40193       | CadSNP15788    | <i>Desi</i>      | Ca_Desig_denovo              | 11295516                       | (G/A)       |
| 40194       | CadSNP15789    | <i>Desi</i>      | Ca_Desig_denovo              | 11295535                       | (A/G)       |
| 40195       | CadSNP15790    | <i>Desi</i>      | Ca_Desig_denovo              | 11295594                       | (G/A)       |
| 40196       | CadSNP15791    | <i>Desi</i>      | Ca_Desig_denovo              | 11297184                       | (A/G)       |
| 40197       | CadSNP15792    | <i>Desi</i>      | Ca_Desig_denovo              | 11305005                       | (C/G)       |
| 40198       | CadSNP15793    | <i>Desi</i>      | Ca_Desig_denovo              | 11307743                       | (G/A)       |
| 40199       | CadSNP15794    | <i>Desi</i>      | Ca_Desig_denovo              | 11311516                       | (C/A)       |
| 40200       | CadSNP15795    | <i>Desi</i>      | Ca_Desig_denovo              | 11311549                       | (T/C)       |
| 40201       | CadSNP15796    | <i>Desi</i>      | Ca_Desig_denovo              | 11312703                       | (T/C)       |
| 40202       | CadSNP15797    | <i>Desi</i>      | Ca_Desig_denovo              | 11313004                       | (T/C)       |
| 40203       | CadSNP15798    | <i>Desi</i>      | Ca_Desig_denovo              | 11313010                       | (A/G)       |

| <b>S.N.</b> | <b>SNP IDs</b> | <b>Cultivars</b> | <b>Chromosomes/scaffolds</b> | <b>Physical positions (bp)</b> | <b>SNPs</b> |
|-------------|----------------|------------------|------------------------------|--------------------------------|-------------|
| 40204       | CadSNP15799    | <i>Desi</i>      | Ca_Desig_denovo              | 11313077                       | (A/C)       |
| 40205       | CadSNP15800    | <i>Desi</i>      | Ca_Desig_denovo              | 11313079                       | (A/C)       |
| 40206       | CadSNP15801    | <i>Desi</i>      | Ca_Desig_denovo              | 11317191                       | (A/G)       |
| 40207       | CadSNP15802    | <i>Desi</i>      | Ca_Desig_denovo              | 11317259                       | (C/T)       |
| 40208       | CadSNP15803    | <i>Desi</i>      | Ca_Desig_denovo              | 11323058                       | (G/T)       |
| 40209       | CadSNP15804    | <i>Desi</i>      | Ca_Desig_denovo              | 11323100                       | (A/G)       |
| 40210       | CadSNP15805    | <i>Desi</i>      | Ca_Desig_denovo              | 11324841                       | (C/G)       |
| 40211       | CadSNP15806    | <i>Desi</i>      | Ca_Desig_denovo              | 11326424                       | (T/C)       |
| 40212       | CadSNP15807    | <i>Desi</i>      | Ca_Desig_denovo              | 11327286                       | (G/C)       |
| 40213       | CadSNP15808    | <i>Desi</i>      | Ca_Desig_denovo              | 11330134                       | (T/C)       |
| 40214       | CadSNP15809    | <i>Desi</i>      | Ca_Desig_denovo              | 11342800                       | (C/T)       |
| 40215       | CadSNP15810    | <i>Desi</i>      | Ca_Desig_denovo              | 11348267                       | (T/A)       |
| 40216       | CadSNP15811    | <i>Desi</i>      | Ca_Desig_denovo              | 11348308                       | (T/C)       |
| 40217       | CadSNP15812    | <i>Desi</i>      | Ca_Desig_denovo              | 11349374                       | (G/A)       |
| 40218       | CadSNP15813    | <i>Desi</i>      | Ca_Desig_denovo              | 11349442                       | (C/T)       |
| 40219       | CadSNP15814    | <i>Desi</i>      | Ca_Desig_denovo              | 11350324                       | (C/G)       |
| 40220       | CadSNP15815    | <i>Desi</i>      | Ca_Desig_denovo              | 11350348                       | (G/T)       |
| 40221       | CadSNP15816    | <i>Desi</i>      | Ca_Desig_denovo              | 11350871                       | (A/G)       |
| 40222       | CadSNP15817    | <i>Desi</i>      | Ca_Desig_denovo              | 11353284                       | (C/T)       |
| 40223       | CadSNP15818    | <i>Desi</i>      | Ca_Desig_denovo              | 11369856                       | (G/A)       |
| 40224       | CadSNP15819    | <i>Desi</i>      | Ca_Desig_denovo              | 11370671                       | (A/G)       |
| 40225       | CadSNP15820    | <i>Desi</i>      | Ca_Desig_denovo              | 11370686                       | (A/G)       |
| 40226       | CadSNP15821    | <i>Desi</i>      | Ca_Desig_denovo              | 11387763                       | (G/A)       |
| 40227       | CadSNP15822    | <i>Desi</i>      | Ca_Desig_denovo              | 11389995                       | (G/T)       |
| 40228       | CadSNP15823    | <i>Desi</i>      | Ca_Desig_denovo              | 11390016                       | (C/G)       |
| 40229       | CadSNP15824    | <i>Desi</i>      | Ca_Desig_denovo              | 11391104                       | (A/C)       |
| 40230       | CadSNP15825    | <i>Desi</i>      | Ca_Desig_denovo              | 11391105                       | (G/C)       |
| 40231       | CadSNP15826    | <i>Desi</i>      | Ca_Desig_denovo              | 11391106                       | (A/G)       |
| 40232       | CadSNP15827    | <i>Desi</i>      | Ca_Desig_denovo              | 11395142                       | (G/T)       |
| 40233       | CadSNP15828    | <i>Desi</i>      | Ca_Desig_denovo              | 11397479                       | (A/T)       |
| 40234       | CadSNP15829    | <i>Desi</i>      | Ca_Desig_denovo              | 11409342                       | (C/G)       |
| 40235       | CadSNP15830    | <i>Desi</i>      | Ca_Desig_denovo              | 11413388                       | (A/C)       |
| 40236       | CadSNP15831    | <i>Desi</i>      | Ca_Desig_denovo              | 11414384                       | (A/T)       |
| 40237       | CadSNP15832    | <i>Desi</i>      | Ca_Desig_denovo              | 11414405                       | (G/A)       |
| 40238       | CadSNP15833    | <i>Desi</i>      | Ca_Desig_denovo              | 11423572                       | (G/C)       |
| 40239       | CadSNP15834    | <i>Desi</i>      | Ca_Desig_denovo              | 11431980                       | (T/C)       |
| 40240       | CadSNP15835    | <i>Desi</i>      | Ca_Desig_denovo              | 11433835                       | (C/T)       |
| 40241       | CadSNP15836    | <i>Desi</i>      | Ca_Desig_denovo              | 11435027                       | (G/C)       |

| <b>S.N.</b> | <b>SNP IDs</b> | <b>Cultivars</b> | <b>Chromosomes/scaffolds</b> | <b>Physical positions (bp)</b> | <b>SNPs</b> |
|-------------|----------------|------------------|------------------------------|--------------------------------|-------------|
| 40242       | CadSNP15837    | <i>Desi</i>      | Ca_Desig_denovo              | 11447494                       | (G/C)       |
| 40243       | CadSNP15838    | <i>Desi</i>      | Ca_Desig_denovo              | 11449460                       | (T/A)       |
| 40244       | CadSNP15839    | <i>Desi</i>      | Ca_Desig_denovo              | 11449498                       | (T/C)       |
| 40245       | CadSNP15840    | <i>Desi</i>      | Ca_Desig_denovo              | 11456205                       | (A/C)       |
| 40246       | CadSNP15841    | <i>Desi</i>      | Ca_Desig_denovo              | 11459152                       | (G/T)       |
| 40247       | CadSNP15842    | <i>Desi</i>      | Ca_Desig_denovo              | 11460799                       | (A/G)       |
| 40248       | CadSNP15843    | <i>Desi</i>      | Ca_Desig_denovo              | 11465009                       | (C/T)       |
| 40249       | CadSNP15844    | <i>Desi</i>      | Ca_Desig_denovo              | 11466927                       | (G/A)       |
| 40250       | CadSNP15845    | <i>Desi</i>      | Ca_Desig_denovo              | 11472735                       | (G/C)       |
| 40251       | CadSNP15846    | <i>Desi</i>      | Ca_Desig_denovo              | 11476769                       | (G/A)       |
| 40252       | CadSNP15847    | <i>Desi</i>      | Ca_Desig_denovo              | 11476873                       | (T/G)       |
| 40253       | CadSNP15848    | <i>Desi</i>      | Ca_Desig_denovo              | 11476886                       | (A/C)       |
| 40254       | CadSNP15849    | <i>Desi</i>      | Ca_Desig_denovo              | 11478286                       | (C/G)       |
| 40255       | CadSNP15850    | <i>Desi</i>      | Ca_Desig_denovo              | 11485924                       | (A/G)       |
| 40256       | CadSNP15851    | <i>Desi</i>      | Ca_Desig_denovo              | 11490367                       | (A/C)       |
| 40257       | CadSNP15852    | <i>Desi</i>      | Ca_Desig_denovo              | 11496016                       | (T/G)       |
| 40258       | CadSNP15853    | <i>Desi</i>      | Ca_Desig_denovo              | 11501495                       | (A/C)       |
| 40259       | CadSNP15854    | <i>Desi</i>      | Ca_Desig_denovo              | 11501497                       | (A/C)       |
| 40260       | CadSNP15855    | <i>Desi</i>      | Ca_Desig_denovo              | 11504261                       | (T/G)       |
| 40261       | CadSNP15856    | <i>Desi</i>      | Ca_Desig_denovo              | 11516115                       | (G/A)       |
| 40262       | CadSNP15857    | <i>Desi</i>      | Ca_Desig_denovo              | 11519202                       | (C/T)       |
| 40263       | CadSNP15858    | <i>Desi</i>      | Ca_Desig_denovo              | 11519258                       | (G/A)       |
| 40264       | CadSNP15859    | <i>Desi</i>      | Ca_Desig_denovo              | 11526241                       | (A/G)       |
| 40265       | CadSNP15860    | <i>Desi</i>      | Ca_Desig_denovo              | 11526721                       | (C/T)       |
| 40266       | CadSNP15861    | <i>Desi</i>      | Ca_Desig_denovo              | 11526730                       | (C/A)       |
| 40267       | CadSNP15862    | <i>Desi</i>      | Ca_Desig_denovo              | 11528402                       | (T/G)       |
| 40268       | CadSNP15863    | <i>Desi</i>      | Ca_Desig_denovo              | 11528456                       | (T/G)       |
| 40269       | CadSNP15864    | <i>Desi</i>      | Ca_Desig_denovo              | 11530284                       | (T/C)       |
| 40270       | CadSNP15865    | <i>Desi</i>      | Ca_Desig_denovo              | 11530311                       | (G/A)       |
| 40271       | CadSNP15866    | <i>Desi</i>      | Ca_Desig_denovo              | 11531105                       | (A/G)       |
| 40272       | CadSNP15867    | <i>Desi</i>      | Ca_Desig_denovo              | 11545219                       | (G/A)       |
| 40273       | CadSNP15868    | <i>Desi</i>      | Ca_Desig_denovo              | 11545257                       | (G/A)       |
| 40274       | CadSNP15869    | <i>Desi</i>      | Ca_Desig_denovo              | 11545588                       | (G/A)       |
| 40275       | CadSNP15870    | <i>Desi</i>      | Ca_Desig_denovo              | 11554581                       | (A/G)       |
| 40276       | CadSNP15871    | <i>Desi</i>      | Ca_Desig_denovo              | 11555843                       | (A/G)       |
| 40277       | CadSNP15872    | <i>Desi</i>      | Ca_Desig_denovo              | 11557029                       | (C/G)       |
| 40278       | CadSNP15873    | <i>Desi</i>      | Ca_Desig_denovo              | 11563481                       | (G/A)       |
| 40279       | CadSNP15874    | <i>Desi</i>      | Ca_Desig_denovo              | 11569129                       | (T/C)       |

| <b>S.N.</b> | <b>SNP IDs</b> | <b>Cultivars</b> | <b>Chromosomes/scaffolds</b> | <b>Physical positions (bp)</b> | <b>SNPs</b> |
|-------------|----------------|------------------|------------------------------|--------------------------------|-------------|
| 40280       | CadSNP15875    | <i>Desi</i>      | Ca_Desig_denovo              | 11577689                       | (C/T)       |
| 40281       | CadSNP15876    | <i>Desi</i>      | Ca_Desig_denovo              | 11583070                       | (T/G)       |
| 40282       | CadSNP15877    | <i>Desi</i>      | Ca_Desig_denovo              | 11583082                       | (A/G)       |
| 40283       | CadSNP15878    | <i>Desi</i>      | Ca_Desig_denovo              | 11589764                       | (A/T)       |
| 40284       | CadSNP15879    | <i>Desi</i>      | Ca_Desig_denovo              | 11589796                       | (G/C)       |
| 40285       | CadSNP15880    | <i>Desi</i>      | Ca_Desig_denovo              | 11601605                       | (T/G)       |
| 40286       | CadSNP15881    | <i>Desi</i>      | Ca_Desig_denovo              | 11604317                       | (A/G)       |
| 40287       | CadSNP15882    | <i>Desi</i>      | Ca_Desig_denovo              | 11604320                       | (C/A)       |
| 40288       | CadSNP15883    | <i>Desi</i>      | Ca_Desig_denovo              | 11611091                       | (C/G)       |
| 40289       | CadSNP15884    | <i>Desi</i>      | Ca_Desig_denovo              | 11611219                       | (G/T)       |
| 40290       | CadSNP15885    | <i>Desi</i>      | Ca_Desig_denovo              | 11612383                       | (A/G)       |
| 40291       | CadSNP15886    | <i>Desi</i>      | Ca_Desig_denovo              | 11631928                       | (C/T)       |
| 40292       | CadSNP15887    | <i>Desi</i>      | Ca_Desig_denovo              | 11631960                       | (A/T)       |
| 40293       | CadSNP15888    | <i>Desi</i>      | Ca_Desig_denovo              | 11634642                       | (T/G)       |
| 40294       | CadSNP15889    | <i>Desi</i>      | Ca_Desig_denovo              | 11634645                       | (A/C)       |
| 40295       | CadSNP15890    | <i>Desi</i>      | Ca_Desig_denovo              | 11636134                       | (T/G)       |
| 40296       | CadSNP15891    | <i>Desi</i>      | Ca_Desig_denovo              | 11639709                       | (C/T)       |
| 40297       | CadSNP15892    | <i>Desi</i>      | Ca_Desig_denovo              | 11640587                       | (C/A)       |
| 40298       | CadSNP15893    | <i>Desi</i>      | Ca_Desig_denovo              | 11642505                       | (G/T)       |
| 40299       | CadSNP15894    | <i>Desi</i>      | Ca_Desig_denovo              | 11642514                       | (G/A)       |
| 40300       | CadSNP15895    | <i>Desi</i>      | Ca_Desig_denovo              | 11648279                       | (G/A)       |
| 40301       | CadSNP15896    | <i>Desi</i>      | Ca_Desig_denovo              | 11652286                       | (A/T)       |
| 40302       | CadSNP15897    | <i>Desi</i>      | Ca_Desig_denovo              | 11654900                       | (G/A)       |
| 40303       | CadSNP15898    | <i>Desi</i>      | Ca_Desig_denovo              | 11654941                       | (C/T)       |
| 40304       | CadSNP15899    | <i>Desi</i>      | Ca_Desig_denovo              | 11667610                       | (C/T)       |
| 40305       | CadSNP15900    | <i>Desi</i>      | Ca_Desig_denovo              | 11667628                       | (G/A)       |
| 40306       | CadSNP15901    | <i>Desi</i>      | Ca_Desig_denovo              | 11669482                       | (G/C)       |
| 40307       | CadSNP15902    | <i>Desi</i>      | Ca_Desig_denovo              | 11670034                       | (C/T)       |
| 40308       | CadSNP15903    | <i>Desi</i>      | Ca_Desig_denovo              | 11670429                       | (A/T)       |
| 40309       | CadSNP15904    | <i>Desi</i>      | Ca_Desig_denovo              | 11670432                       | (T/C)       |
| 40310       | CadSNP15905    | <i>Desi</i>      | Ca_Desig_denovo              | 11671995                       | (C/G)       |
| 40311       | CadSNP15906    | <i>Desi</i>      | Ca_Desig_denovo              | 11672865                       | (T/G)       |
| 40312       | CadSNP15907    | <i>Desi</i>      | Ca_Desig_denovo              | 11691508                       | (C/T)       |
| 40313       | CadSNP15908    | <i>Desi</i>      | Ca_Desig_denovo              | 11691554                       | (C/T)       |
| 40314       | CadSNP15909    | <i>Desi</i>      | Ca_Desig_denovo              | 11691586                       | (G/C)       |
| 40315       | CadSNP15910    | <i>Desi</i>      | Ca_Desig_denovo              | 11693615                       | (G/C)       |
| 40316       | CadSNP15911    | <i>Desi</i>      | Ca_Desig_denovo              | 11693626                       | (C/T)       |
| 40317       | CadSNP15912    | <i>Desi</i>      | Ca_Desig_denovo              | 11699541                       | (C/T)       |

| <b>S.N.</b> | <b>SNP IDs</b> | <b>Cultivars</b> | <b>Chromosomes/scaffolds</b> | <b>Physical positions (bp)</b> | <b>SNPs</b> |
|-------------|----------------|------------------|------------------------------|--------------------------------|-------------|
| 40318       | CadSNP15913    | <i>Desi</i>      | Ca_Desig_denovo              | 11709973                       | (C/G)       |
| 40319       | CadSNP15914    | <i>Desi</i>      | Ca_Desig_denovo              | 11709979                       | (G/A)       |
| 40320       | CadSNP15915    | <i>Desi</i>      | Ca_Desig_denovo              | 11714461                       | (C/T)       |
| 40321       | CadSNP15916    | <i>Desi</i>      | Ca_Desig_denovo              | 11715154                       | (A/C)       |
| 40322       | CadSNP15917    | <i>Desi</i>      | Ca_Desig_denovo              | 11722568                       | (T/G)       |
| 40323       | CadSNP15918    | <i>Desi</i>      | Ca_Desig_denovo              | 11722598                       | (A/G)       |
| 40324       | CadSNP15919    | <i>Desi</i>      | Ca_Desig_denovo              | 11729966                       | (A/G)       |
| 40325       | CadSNP15920    | <i>Desi</i>      | Ca_Desig_denovo              | 11732342                       | (A/G)       |
| 40326       | CadSNP15921    | <i>Desi</i>      | Ca_Desig_denovo              | 11739407                       | (C/G)       |
| 40327       | CadSNP15922    | <i>Desi</i>      | Ca_Desig_denovo              | 11740721                       | (A/G)       |
| 40328       | CadSNP15923    | <i>Desi</i>      | Ca_Desig_denovo              | 11742839                       | (G/C)       |
| 40329       | CadSNP15924    | <i>Desi</i>      | Ca_Desig_denovo              | 11755328                       | (A/C)       |
| 40330       | CadSNP15925    | <i>Desi</i>      | Ca_Desig_denovo              | 11755343                       | (A/G)       |
| 40331       | CadSNP15926    | <i>Desi</i>      | Ca_Desig_denovo              | 11768901                       | (G/T)       |
| 40332       | CadSNP15927    | <i>Desi</i>      | Ca_Desig_denovo              | 11768962                       | (C/G)       |
| 40333       | CadSNP15928    | <i>Desi</i>      | Ca_Desig_denovo              | 11770662                       | (G/A)       |
| 40334       | CadSNP15929    | <i>Desi</i>      | Ca_Desig_denovo              | 11772061                       | (C/T)       |
| 40335       | CadSNP15930    | <i>Desi</i>      | Ca_Desig_denovo              | 11772608                       | (G/A)       |
| 40336       | CadSNP15931    | <i>Desi</i>      | Ca_Desig_denovo              | 11774088                       | (A/G)       |
| 40337       | CadSNP15932    | <i>Desi</i>      | Ca_Desig_denovo              | 11774126                       | (G/A)       |
| 40338       | CadSNP15933    | <i>Desi</i>      | Ca_Desig_denovo              | 11777627                       | (C/T)       |
| 40339       | CadSNP15934    | <i>Desi</i>      | Ca_Desig_denovo              | 11777636                       | (A/G)       |
| 40340       | CadSNP15935    | <i>Desi</i>      | Ca_Desig_denovo              | 11777830                       | (C/T)       |
| 40341       | CadSNP15936    | <i>Desi</i>      | Ca_Desig_denovo              | 11782033                       | (C/T)       |
| 40342       | CadSNP15937    | <i>Desi</i>      | Ca_Desig_denovo              | 11782542                       | (C/T)       |
| 40343       | CadSNP15938    | <i>Desi</i>      | Ca_Desig_denovo              | 11787137                       | (A/G)       |
| 40344       | CadSNP15939    | <i>Desi</i>      | Ca_Desig_denovo              | 11787148                       | (T/G)       |
| 40345       | CadSNP15940    | <i>Desi</i>      | Ca_Desig_denovo              | 11787160                       | (C/A)       |
| 40346       | CadSNP15941    | <i>Desi</i>      | Ca_Desig_denovo              | 11787190                       | (G/T)       |
| 40347       | CadSNP15942    | <i>Desi</i>      | Ca_Desig_denovo              | 11788224                       | (C/G)       |
| 40348       | CadSNP15943    | <i>Desi</i>      | Ca_Desig_denovo              | 11788240                       | (T/C)       |
| 40349       | CadSNP15944    | <i>Desi</i>      | Ca_Desig_denovo              | 11793456                       | (C/T)       |
| 40350       | CadSNP15945    | <i>Desi</i>      | Ca_Desig_denovo              | 11793465                       | (C/T)       |
| 40351       | CadSNP15946    | <i>Desi</i>      | Ca_Desig_denovo              | 11804261                       | (T/C)       |
| 40352       | CadSNP15947    | <i>Desi</i>      | Ca_Desig_denovo              | 11804267                       | (G/A)       |
| 40353       | CadSNP15948    | <i>Desi</i>      | Ca_Desig_denovo              | 11811389                       | (G/T)       |
| 40354       | CadSNP15949    | <i>Desi</i>      | Ca_Desig_denovo              | 11811401                       | (T/C)       |
| 40355       | CadSNP15950    | <i>Desi</i>      | Ca_Desig_denovo              | 11811423                       | (T/G)       |



| <b>S.N.</b> | <b>SNP IDs</b> | <b>Cultivars</b> | <b>Chromosomes/scaffolds</b> | <b>Physical positions (bp)</b> | <b>SNPs</b> |
|-------------|----------------|------------------|------------------------------|--------------------------------|-------------|
| 40356       | CadSNP15951    | <i>Desi</i>      | Ca_Desig_denovo              | 11818581                       | (C/T)       |
| 40357       | CadSNP15952    | <i>Desi</i>      | Ca_Desig_denovo              | 11819666                       | (G/T)       |
| 40358       | CadSNP15953    | <i>Desi</i>      | Ca_Desig_denovo              | 11819678                       | (A/G)       |
| 40359       | CadSNP15954    | <i>Desi</i>      | Ca_Desig_denovo              | 11832937                       | (T/C)       |
| 40360       | CadSNP15955    | <i>Desi</i>      | Ca_Desig_denovo              | 11835871                       | (G/T)       |
| 40361       | CadSNP15956    | <i>Desi</i>      | Ca_Desig_denovo              | 11835872                       | (T/C)       |
| 40362       | CadSNP15957    | <i>Desi</i>      | Ca_Desig_denovo              | 11837345                       | (A/G)       |
| 40363       | CadSNP15958    | <i>Desi</i>      | Ca_Desig_denovo              | 11841347                       | (T/G)       |
| 40364       | CadSNP15959    | <i>Desi</i>      | Ca_Desig_denovo              | 11842657                       | (T/C)       |
| 40365       | CadSNP15960    | <i>Desi</i>      | Ca_Desig_denovo              | 11862164                       | (A/G)       |
| 40366       | CadSNP15961    | <i>Desi</i>      | Ca_Desig_denovo              | 11874367                       | (C/T)       |
| 40367       | CadSNP15962    | <i>Desi</i>      | Ca_Desig_denovo              | 11876112                       | (T/A)       |
| 40368       | CadSNP15963    | <i>Desi</i>      | Ca_Desig_denovo              | 11877478                       | (T/C)       |
| 40369       | CadSNP15964    | <i>Desi</i>      | Ca_Desig_denovo              | 11877487                       | (G/T)       |
| 40370       | CadSNP15965    | <i>Desi</i>      | Ca_Desig_denovo              | 11884395                       | (A/G)       |
| 40371       | CadSNP15966    | <i>Desi</i>      | Ca_Desig_denovo              | 11884398                       | (G/C)       |
| 40372       | CadSNP15967    | <i>Desi</i>      | Ca_Desig_denovo              | 11885443                       | (G/C)       |
| 40373       | CadSNP15968    | <i>Desi</i>      | Ca_Desig_denovo              | 11891338                       | (T/C)       |
| 40374       | CadSNP15969    | <i>Desi</i>      | Ca_Desig_denovo              | 11891351                       | (C/G)       |
| 40375       | CadSNP15970    | <i>Desi</i>      | Ca_Desig_denovo              | 11899089                       | (A/G)       |
| 40376       | CadSNP15971    | <i>Desi</i>      | Ca_Desig_denovo              | 11900104                       | (T/C)       |
| 40377       | CadSNP15972    | <i>Desi</i>      | Ca_Desig_denovo              | 11903745                       | (C/A)       |
| 40378       | CadSNP15973    | <i>Desi</i>      | Ca_Desig_denovo              | 11905970                       | (G/A)       |
| 40379       | CadSNP15974    | <i>Desi</i>      | Ca_Desig_denovo              | 11905978                       | (C/A)       |
| 40380       | CadSNP15975    | <i>Desi</i>      | Ca_Desig_denovo              | 11911358                       | (A/G)       |
| 40381       | CadSNP15976    | <i>Desi</i>      | Ca_Desig_denovo              | 11911372                       | (T/C)       |
| 40382       | CadSNP15977    | <i>Desi</i>      | Ca_Desig_denovo              | 11914586                       | (G/A)       |
| 40383       | CadSNP15978    | <i>Desi</i>      | Ca_Desig_denovo              | 11917816                       | (G/A)       |
| 40384       | CadSNP15979    | <i>Desi</i>      | Ca_Desig_denovo              | 11919108                       | (G/C)       |
| 40385       | CadSNP15980    | <i>Desi</i>      | Ca_Desig_denovo              | 11919114                       | (C/T)       |
| 40386       | CadSNP15981    | <i>Desi</i>      | Ca_Desig_denovo              | 11925872                       | (G/A)       |
| 40387       | CadSNP15982    | <i>Desi</i>      | Ca_Desig_denovo              | 11925891                       | (T/A)       |
| 40388       | CadSNP15983    | <i>Desi</i>      | Ca_Desig_denovo              | 11932837                       | (T/G)       |
| 40389       | CadSNP15984    | <i>Desi</i>      | Ca_Desig_denovo              | 11933397                       | (T/C)       |
| 40390       | CadSNP15985    | <i>Desi</i>      | Ca_Desig_denovo              | 11933608                       | (A/G)       |
| 40391       | CadSNP15986    | <i>Desi</i>      | Ca_Desig_denovo              | 11933614                       | (G/C)       |
| 40392       | CadSNP15987    | <i>Desi</i>      | Ca_Desig_denovo              | 11937317                       | (A/G)       |
| 40393       | CadSNP15988    | <i>Desi</i>      | Ca_Desig_denovo              | 11937333                       | (G/C)       |

| <b>S.N.</b> | <b>SNP IDs</b> | <b>Cultivars</b> | <b>Chromosomes/scaffolds</b> | <b>Physical positions (bp)</b> | <b>SNPs</b> |
|-------------|----------------|------------------|------------------------------|--------------------------------|-------------|
| 40394       | CadSNP15989    | <i>Desi</i>      | Ca_Desig_denovo              | 11938292                       | (T/C)       |
| 40395       | CadSNP15990    | <i>Desi</i>      | Ca_Desig_denovo              | 11938298                       | (T/C)       |
| 40396       | CadSNP15991    | <i>Desi</i>      | Ca_Desig_denovo              | 11940650                       | (A/G)       |
| 40397       | CadSNP15992    | <i>Desi</i>      | Ca_Desig_denovo              | 11941799                       | (C/T)       |
| 40398       | CadSNP15993    | <i>Desi</i>      | Ca_Desig_denovo              | 11941849                       | (C/A)       |
| 40399       | CadSNP15994    | <i>Desi</i>      | Ca_Desig_denovo              | 11947536                       | (A/C)       |
| 40400       | CadSNP15995    | <i>Desi</i>      | Ca_Desig_denovo              | 11951354                       | (C/A)       |
| 40401       | CadSNP15996    | <i>Desi</i>      | Ca_Desig_denovo              | 11951372                       | (A/T)       |
| 40402       | CadSNP15997    | <i>Desi</i>      | Ca_Desig_denovo              | 11957863                       | (C/T)       |
| 40403       | CadSNP15998    | <i>Desi</i>      | Ca_Desig_denovo              | 11957893                       | (G/A)       |
| 40404       | CadSNP15999    | <i>Desi</i>      | Ca_Desig_denovo              | 11961253                       | (G/C)       |
| 40405       | CadSNP16000    | <i>Desi</i>      | Ca_Desig_denovo              | 11966848                       | (A/C)       |
| 40406       | CadSNP16001    | <i>Desi</i>      | Ca_Desig_denovo              | 11972883                       | (G/T)       |
| 40407       | CadSNP16002    | <i>Desi</i>      | Ca_Desig_denovo              | 11974611                       | (A/T)       |
| 40408       | CadSNP16003    | <i>Desi</i>      | Ca_Desig_denovo              | 11974625                       | (G/A)       |
| 40409       | CadSNP16004    | <i>Desi</i>      | Ca_Desig_denovo              | 11974631                       | (T/C)       |
| 40410       | CadSNP16005    | <i>Desi</i>      | Ca_Desig_denovo              | 11977669                       | (A/G)       |
| 40411       | CadSNP16006    | <i>Desi</i>      | Ca_Desig_denovo              | 11982985                       | (G/T)       |
| 40412       | CadSNP16007    | <i>Desi</i>      | Ca_Desig_denovo              | 11985596                       | (G/A)       |
| 40413       | CadSNP16008    | <i>Desi</i>      | Ca_Desig_denovo              | 11987078                       | (A/G)       |
| 40414       | CadSNP16009    | <i>Desi</i>      | Ca_Desig_denovo              | 11989132                       | (T/G)       |
| 40415       | CadSNP16010    | <i>Desi</i>      | Ca_Desig_denovo              | 11989157                       | (T/G)       |
| 40416       | CadSNP16011    | <i>Desi</i>      | Ca_Desig_denovo              | 11993360                       | (C/T)       |
| 40417       | CadSNP16012    | <i>Desi</i>      | Ca_Desig_denovo              | 11993369                       | (C/G)       |
| 40418       | CadSNP16013    | <i>Desi</i>      | Ca_Desig_denovo              | 11999604                       | (A/C)       |
| 40419       | CadSNP16014    | <i>Desi</i>      | Ca_Desig_denovo              | 11999605                       | (A/G)       |
| 40420       | CadSNP16015    | <i>Desi</i>      | Ca_Desig_denovo              | 12008450                       | (C/A)       |
| 40421       | CadSNP16016    | <i>Desi</i>      | Ca_Desig_denovo              | 12008518                       | (T/C)       |
| 40422       | CadSNP16017    | <i>Desi</i>      | Ca_Desig_denovo              | 12012784                       | (A/G)       |
| 40423       | CadSNP16018    | <i>Desi</i>      | Ca_Desig_denovo              | 12015908                       | (C/T)       |
| 40424       | CadSNP16019    | <i>Desi</i>      | Ca_Desig_denovo              | 12022966                       | (G/T)       |
| 40425       | CadSNP16020    | <i>Desi</i>      | Ca_Desig_denovo              | 12029374                       | (C/T)       |
| 40426       | CadSNP16021    | <i>Desi</i>      | Ca_Desig_denovo              | 12029431                       | (T/C)       |
| 40427       | CadSNP16022    | <i>Desi</i>      | Ca_Desig_denovo              | 12029481                       | (C/T)       |
| 40428       | CadSNP16023    | <i>Desi</i>      | Ca_Desig_denovo              | 12032416                       | (G/A)       |
| 40429       | CadSNP16024    | <i>Desi</i>      | Ca_Desig_denovo              | 12034730                       | (T/C)       |
| 40430       | CadSNP16025    | <i>Desi</i>      | Ca_Desig_denovo              | 12034732                       | (A/G)       |
| 40431       | CadSNP16026    | <i>Desi</i>      | Ca_Desig_denovo              | 12035976                       | (C/G)       |

| <b>S.N.</b> | <b>SNP IDs</b> | <b>Cultivars</b> | <b>Chromosomes/scaffolds</b> | <b>Physical positions (bp)</b> | <b>SNPs</b> |
|-------------|----------------|------------------|------------------------------|--------------------------------|-------------|
| 40432       | CadSNP16027    | <i>Desi</i>      | Ca_Desig_denovo              | 12046415                       | (C/G)       |
| 40433       | CadSNP16028    | <i>Desi</i>      | Ca_Desig_denovo              | 12046433                       | (T/C)       |
| 40434       | CadSNP16029    | <i>Desi</i>      | Ca_Desig_denovo              | 12048800                       | (A/C)       |
| 40435       | CadSNP16030    | <i>Desi</i>      | Ca_Desig_denovo              | 12049528                       | (C/T)       |
| 40436       | CadSNP16031    | <i>Desi</i>      | Ca_Desig_denovo              | 12049531                       | (C/A)       |
| 40437       | CadSNP16032    | <i>Desi</i>      | Ca_Desig_denovo              | 12061769                       | (A/G)       |
| 40438       | CadSNP16033    | <i>Desi</i>      | Ca_Desig_denovo              | 12061807                       | (G/C)       |
| 40439       | CadSNP16034    | <i>Desi</i>      | Ca_Desig_denovo              | 12064262                       | (C/T)       |
| 40440       | CadSNP16035    | <i>Desi</i>      | Ca_Desig_denovo              | 12065985                       | (T/G)       |
| 40441       | CadSNP16036    | <i>Desi</i>      | Ca_Desig_denovo              | 12066006                       | (T/G)       |
| 40442       | CadSNP16037    | <i>Desi</i>      | Ca_Desig_denovo              | 12067321                       | (C/T)       |
| 40443       | CadSNP16038    | <i>Desi</i>      | Ca_Desig_denovo              | 12069782                       | (G/T)       |
| 40444       | CadSNP16039    | <i>Desi</i>      | Ca_Desig_denovo              | 12074391                       | (T/C)       |
| 40445       | CadSNP16040    | <i>Desi</i>      | Ca_Desig_denovo              | 12074399                       | (G/A)       |
| 40446       | CadSNP16041    | <i>Desi</i>      | Ca_Desig_denovo              | 12085341                       | (G/A)       |
| 40447       | CadSNP16042    | <i>Desi</i>      | Ca_Desig_denovo              | 12089024                       | (G/T)       |
| 40448       | CadSNP16043    | <i>Desi</i>      | Ca_Desig_denovo              | 12089031                       | (G/C)       |
| 40449       | CadSNP16044    | <i>Desi</i>      | Ca_Desig_denovo              | 12090759                       | (C/G)       |
| 40450       | CadSNP16045    | <i>Desi</i>      | Ca_Desig_denovo              | 12092276                       | (T/C)       |
| 40451       | CadSNP16046    | <i>Desi</i>      | Ca_Desig_denovo              | 12098114                       | (A/G)       |
| 40452       | CadSNP16047    | <i>Desi</i>      | Ca_Desig_denovo              | 12098117                       | (T/G)       |
| 40453       | CadSNP16048    | <i>Desi</i>      | Ca_Desig_denovo              | 12106488                       | (A/G)       |
| 40454       | CadSNP16049    | <i>Desi</i>      | Ca_Desig_denovo              | 12106494                       | (C/T)       |
| 40455       | CadSNP16050    | <i>Desi</i>      | Ca_Desig_denovo              | 12106946                       | (G/A)       |
| 40456       | CadSNP16051    | <i>Desi</i>      | Ca_Desig_denovo              | 12106982                       | (G/C)       |
| 40457       | CadSNP16052    | <i>Desi</i>      | Ca_Desig_denovo              | 12108314                       | (A/G)       |
| 40458       | CadSNP16053    | <i>Desi</i>      | Ca_Desig_denovo              | 12109055                       | (A/G)       |
| 40459       | CadSNP16054    | <i>Desi</i>      | Ca_Desig_denovo              | 12112276                       | (T/C)       |
| 40460       | CadSNP16055    | <i>Desi</i>      | Ca_Desig_denovo              | 12113590                       | (C/T)       |
| 40461       | CadSNP16056    | <i>Desi</i>      | Ca_Desig_denovo              | 12113599                       | (T/C)       |
| 40462       | CadSNP16057    | <i>Desi</i>      | Ca_Desig_denovo              | 12122753                       | (A/G)       |
| 40463       | CadSNP16058    | <i>Desi</i>      | Ca_Desig_denovo              | 12127600                       | (C/T)       |
| 40464       | CadSNP16059    | <i>Desi</i>      | Ca_Desig_denovo              | 12127606                       | (T/C)       |
| 40465       | CadSNP16060    | <i>Desi</i>      | Ca_Desig_denovo              | 12127618                       | (T/C)       |
| 40466       | CadSNP16061    | <i>Desi</i>      | Ca_Desig_denovo              | 12128218                       | (G/A)       |
| 40467       | CadSNP16062    | <i>Desi</i>      | Ca_Desig_denovo              | 12128901                       | (T/C)       |
| 40468       | CadSNP16063    | <i>Desi</i>      | Ca_Desig_denovo              | 12128941                       | (G/A)       |
| 40469       | CadSNP16064    | <i>Desi</i>      | Ca_Desig_denovo              | 12133713                       | (T/A)       |

| <b>S.N.</b> | <b>SNP IDs</b> | <b>Cultivars</b> | <b>Chromosomes/scaffolds</b> | <b>Physical positions (bp)</b> | <b>SNPs</b> |
|-------------|----------------|------------------|------------------------------|--------------------------------|-------------|
| 40470       | CadSNP16065    | <i>Desi</i>      | Ca_Desig_denovo              | 12134191                       | (G/T)       |
| 40471       | CadSNP16066    | <i>Desi</i>      | Ca_Desig_denovo              | 12135210                       | (T/C)       |
| 40472       | CadSNP16067    | <i>Desi</i>      | Ca_Desig_denovo              | 12135959                       | (T/G)       |
| 40473       | CadSNP16068    | <i>Desi</i>      | Ca_Desig_denovo              | 12137043                       | (T/C)       |
| 40474       | CadSNP16069    | <i>Desi</i>      | Ca_Desig_denovo              | 12145807                       | (T/G)       |
| 40475       | CadSNP16070    | <i>Desi</i>      | Ca_Desig_denovo              | 12145813                       | (T/C)       |
| 40476       | CadSNP16071    | <i>Desi</i>      | Ca_Desig_denovo              | 12146919                       | (A/T)       |
| 40477       | CadSNP16072    | <i>Desi</i>      | Ca_Desig_denovo              | 12150118                       | (A/G)       |
| 40478       | CadSNP16073    | <i>Desi</i>      | Ca_Desig_denovo              | 12152673                       | (C/T)       |
| 40479       | CadSNP16074    | <i>Desi</i>      | Ca_Desig_denovo              | 12154262                       | (A/C)       |
| 40480       | CadSNP16075    | <i>Desi</i>      | Ca_Desig_denovo              | 12154263                       | (G/T)       |
| 40481       | CadSNP16076    | <i>Desi</i>      | Ca_Desig_denovo              | 12154264                       | (A/G)       |
| 40482       | CadSNP16077    | <i>Desi</i>      | Ca_Desig_denovo              | 12159073                       | (G/A)       |
| 40483       | CadSNP16078    | <i>Desi</i>      | Ca_Desig_denovo              | 12164687                       | (C/G)       |
| 40484       | CadSNP16079    | <i>Desi</i>      | Ca_Desig_denovo              | 12164696                       | (A/G)       |
| 40485       | CadSNP16080    | <i>Desi</i>      | Ca_Desig_denovo              | 12177218                       | (C/A)       |
| 40486       | CadSNP16081    | <i>Desi</i>      | Ca_Desig_denovo              | 12180631                       | (G/C)       |
| 40487       | CadSNP16082    | <i>Desi</i>      | Ca_Desig_denovo              | 12183323                       | (A/G)       |
| 40488       | CadSNP16083    | <i>Desi</i>      | Ca_Desig_denovo              | 12183332                       | (T/C)       |
| 40489       | CadSNP16084    | <i>Desi</i>      | Ca_Desig_denovo              | 12183456                       | (A/G)       |
| 40490       | CadSNP16085    | <i>Desi</i>      | Ca_Desig_denovo              | 12183465                       | (A/G)       |
| 40491       | CadSNP16086    | <i>Desi</i>      | Ca_Desig_denovo              | 12187213                       | (C/T)       |
| 40492       | CadSNP16087    | <i>Desi</i>      | Ca_Desig_denovo              | 12187256                       | (C/T)       |
| 40493       | CadSNP16088    | <i>Desi</i>      | Ca_Desig_denovo              | 12187570                       | (C/T)       |
| 40494       | CadSNP16089    | <i>Desi</i>      | Ca_Desig_denovo              | 12192333                       | (G/C)       |
| 40495       | CadSNP16090    | <i>Desi</i>      | Ca_Desig_denovo              | 12201733                       | (C/T)       |
| 40496       | CadSNP16091    | <i>Desi</i>      | Ca_Desig_denovo              | 12203580                       | (G/C)       |
| 40497       | CadSNP16092    | <i>Desi</i>      | Ca_Desig_denovo              | 12203619                       | (G/C)       |
| 40498       | CadSNP16093    | <i>Desi</i>      | Ca_Desig_denovo              | 12203656                       | (A/G)       |
| 40499       | CadSNP16094    | <i>Desi</i>      | Ca_Desig_denovo              | 12203680                       | (A/G)       |
| 40500       | CadSNP16095    | <i>Desi</i>      | Ca_Desig_denovo              | 12220954                       | (A/G)       |
| 40501       | CadSNP16096    | <i>Desi</i>      | Ca_Desig_denovo              | 12220999                       | (A/G)       |
| 40502       | CadSNP16097    | <i>Desi</i>      | Ca_Desig_denovo              | 12226262                       | (G/A)       |
| 40503       | CadSNP16098    | <i>Desi</i>      | Ca_Desig_denovo              | 12226270                       | (T/C)       |
| 40504       | CadSNP16099    | <i>Desi</i>      | Ca_Desig_denovo              | 12226283                       | (T/C)       |
| 40505       | CadSNP16100    | <i>Desi</i>      | Ca_Desig_denovo              | 12226937                       | (T/C)       |
| 40506       | CadSNP16101    | <i>Desi</i>      | Ca_Desig_denovo              | 12226989                       | (A/G)       |
| 40507       | CadSNP16102    | <i>Desi</i>      | Ca_Desig_denovo              | 12227465                       | (G/A)       |

| <b>S.N.</b> | <b>SNP IDs</b> | <b>Cultivars</b> | <b>Chromosomes/scaffolds</b> | <b>Physical positions (bp)</b> | <b>SNPs</b> |
|-------------|----------------|------------------|------------------------------|--------------------------------|-------------|
| 40508       | CadSNP16103    | <i>Desi</i>      | Ca_Desig_denovo              | 12227468                       | (G/A)       |
| 40509       | CadSNP16104    | <i>Desi</i>      | Ca_Desig_denovo              | 12228231                       | (C/G)       |
| 40510       | CadSNP16105    | <i>Desi</i>      | Ca_Desig_denovo              | 12229659                       | (T/C)       |
| 40511       | CadSNP16106    | <i>Desi</i>      | Ca_Desig_denovo              | 12232496                       | (T/C)       |
| 40512       | CadSNP16107    | <i>Desi</i>      | Ca_Desig_denovo              | 12238428                       | (G/T)       |
| 40513       | CadSNP16108    | <i>Desi</i>      | Ca_Desig_denovo              | 12248122                       | (T/C)       |
| 40514       | CadSNP16109    | <i>Desi</i>      | Ca_Desig_denovo              | 12255457                       | (A/C)       |
| 40515       | CadSNP16110    | <i>Desi</i>      | Ca_Desig_denovo              | 12255499                       | (G/T)       |
| 40516       | CadSNP16111    | <i>Desi</i>      | Ca_Desig_denovo              | 12256498                       | (T/C)       |
| 40517       | CadSNP16112    | <i>Desi</i>      | Ca_Desig_denovo              | 12258968                       | (A/T)       |
| 40518       | CadSNP16113    | <i>Desi</i>      | Ca_Desig_denovo              | 12260944                       | (T/C)       |
| 40519       | CadSNP16114    | <i>Desi</i>      | Ca_Desig_denovo              | 12261020                       | (G/A)       |
| 40520       | CadSNP16115    | <i>Desi</i>      | Ca_Desig_denovo              | 12266615                       | (G/A)       |
| 40521       | CadSNP16116    | <i>Desi</i>      | Ca_Desig_denovo              | 12266633                       | (A/G)       |
| 40522       | CadSNP16117    | <i>Desi</i>      | Ca_Desig_denovo              | 12269185                       | (C/G)       |
| 40523       | CadSNP16118    | <i>Desi</i>      | Ca_Desig_denovo              | 12275814                       | (A/C)       |
| 40524       | CadSNP16119    | <i>Desi</i>      | Ca_Desig_denovo              | 12275815                       | (G/C)       |
| 40525       | CadSNP16120    | <i>Desi</i>      | Ca_Desig_denovo              | 12282148                       | (G/A)       |
| 40526       | CadSNP16121    | <i>Desi</i>      | Ca_Desig_denovo              | 12283522                       | (A/T)       |
| 40527       | CadSNP16122    | <i>Desi</i>      | Ca_Desig_denovo              | 12289309                       | (T/C)       |
| 40528       | CadSNP16123    | <i>Desi</i>      | Ca_Desig_denovo              | 12289393                       | (G/T)       |
| 40529       | CadSNP16124    | <i>Desi</i>      | Ca_Desig_denovo              | 12294347                       | (G/A)       |
| 40530       | CadSNP16125    | <i>Desi</i>      | Ca_Desig_denovo              | 12298514                       | (T/C)       |
| 40531       | CadSNP16126    | <i>Desi</i>      | Ca_Desig_denovo              | 12299495                       | (A/T)       |
| 40532       | CadSNP16127    | <i>Desi</i>      | Ca_Desig_denovo              | 12305543                       | (A/G)       |
| 40533       | CadSNP16128    | <i>Desi</i>      | Ca_Desig_denovo              | 12305687                       | (C/T)       |
| 40534       | CadSNP16129    | <i>Desi</i>      | Ca_Desig_denovo              | 12305705                       | (G/C)       |
| 40535       | CadSNP16130    | <i>Desi</i>      | Ca_Desig_denovo              | 12317690                       | (T/C)       |
| 40536       | CadSNP16131    | <i>Desi</i>      | Ca_Desig_denovo              | 12317726                       | (A/G)       |
| 40537       | CadSNP16132    | <i>Desi</i>      | Ca_Desig_denovo              | 12317930                       | (T/C)       |
| 40538       | CadSNP16133    | <i>Desi</i>      | Ca_Desig_denovo              | 12327178                       | (C/T)       |
| 40539       | CadSNP16134    | <i>Desi</i>      | Ca_Desig_denovo              | 12327193                       | (C/G)       |
| 40540       | CadSNP16135    | <i>Desi</i>      | Ca_Desig_denovo              | 12335077                       | (T/G)       |
| 40541       | CadSNP16136    | <i>Desi</i>      | Ca_Desig_denovo              | 12336762                       | (C/G)       |
| 40542       | CadSNP16137    | <i>Desi</i>      | Ca_Desig_denovo              | 12336770                       | (C/T)       |
| 40543       | CadSNP16138    | <i>Desi</i>      | Ca_Desig_denovo              | 12338153                       | (G/A)       |
| 40544       | CadSNP16139    | <i>Desi</i>      | Ca_Desig_denovo              | 12338559                       | (T/C)       |
| 40545       | CadSNP16140    | <i>Desi</i>      | Ca_Desig_denovo              | 12338589                       | (A/C)       |

| <b>S.N.</b> | <b>SNP IDs</b> | <b>Cultivars</b> | <b>Chromosomes/scaffolds</b> | <b>Physical positions (bp)</b> | <b>SNPs</b> |
|-------------|----------------|------------------|------------------------------|--------------------------------|-------------|
| 40546       | CadSNP16141    | <i>Desi</i>      | Ca_Desig_denovo              | 12341050                       | (G/T)       |
| 40547       | CadSNP16142    | <i>Desi</i>      | Ca_Desig_denovo              | 12343728                       | (A/G)       |
| 40548       | CadSNP16143    | <i>Desi</i>      | Ca_Desig_denovo              | 12354889                       | (G/A)       |
| 40549       | CadSNP16144    | <i>Desi</i>      | Ca_Desig_denovo              | 12354939                       | (G/A)       |
| 40550       | CadSNP16145    | <i>Desi</i>      | Ca_Desig_denovo              | 12354956                       | (G/C)       |
| 40551       | CadSNP16146    | <i>Desi</i>      | Ca_Desig_denovo              | 12357124                       | (C/T)       |
| 40552       | CadSNP16147    | <i>Desi</i>      | Ca_Desig_denovo              | 12357137                       | (A/G)       |
| 40553       | CadSNP16148    | <i>Desi</i>      | Ca_Desig_denovo              | 12357203                       | (C/A)       |
| 40554       | CadSNP16149    | <i>Desi</i>      | Ca_Desig_denovo              | 12378214                       | (A/C)       |
| 40555       | CadSNP16150    | <i>Desi</i>      | Ca_Desig_denovo              | 12378271                       | (T/C)       |
| 40556       | CadSNP16151    | <i>Desi</i>      | Ca_Desig_denovo              | 12381757                       | (G/A)       |
| 40557       | CadSNP16152    | <i>Desi</i>      | Ca_Desig_denovo              | 12381805                       | (A/G)       |
| 40558       | CadSNP16153    | <i>Desi</i>      | Ca_Desig_denovo              | 12383810                       | (T/C)       |
| 40559       | CadSNP16154    | <i>Desi</i>      | Ca_Desig_denovo              | 12383838                       | (G/A)       |
| 40560       | CadSNP16155    | <i>Desi</i>      | Ca_Desig_denovo              | 12393186                       | (A/G)       |
| 40561       | CadSNP16156    | <i>Desi</i>      | Ca_Desig_denovo              | 12393204                       | (T/C)       |
| 40562       | CadSNP16157    | <i>Desi</i>      | Ca_Desig_denovo              | 12394585                       | (C/T)       |
| 40563       | CadSNP16158    | <i>Desi</i>      | Ca_Desig_denovo              | 12399545                       | (G/A)       |
| 40564       | CadSNP16159    | <i>Desi</i>      | Ca_Desig_denovo              | 12399575                       | (A/G)       |
| 40565       | CadSNP16160    | <i>Desi</i>      | Ca_Desig_denovo              | 12400442                       | (T/C)       |
| 40566       | CadSNP16161    | <i>Desi</i>      | Ca_Desig_denovo              | 12400835                       | (A/G)       |
| 40567       | CadSNP16162    | <i>Desi</i>      | Ca_Desig_denovo              | 12400838                       | (G/A)       |
| 40568       | CadSNP16163    | <i>Desi</i>      | Ca_Desig_denovo              | 12401349                       | (T/C)       |
| 40569       | CadSNP16164    | <i>Desi</i>      | Ca_Desig_denovo              | 12403546                       | (T/C)       |
| 40570       | CadSNP16165    | <i>Desi</i>      | Ca_Desig_denovo              | 12405649                       | (C/T)       |
| 40571       | CadSNP16166    | <i>Desi</i>      | Ca_Desig_denovo              | 12405655                       | (T/A)       |
| 40572       | CadSNP16167    | <i>Desi</i>      | Ca_Desig_denovo              | 12406984                       | (C/A)       |
| 40573       | CadSNP16168    | <i>Desi</i>      | Ca_Desig_denovo              | 12409072                       | (C/G)       |
| 40574       | CadSNP16169    | <i>Desi</i>      | Ca_Desig_denovo              | 12414245                       | (G/T)       |
| 40575       | CadSNP16170    | <i>Desi</i>      | Ca_Desig_denovo              | 12414254                       | (C/T)       |
| 40576       | CadSNP16171    | <i>Desi</i>      | Ca_Desig_denovo              | 12416758                       | (G/A)       |
| 40577       | CadSNP16172    | <i>Desi</i>      | Ca_Desig_denovo              | 12416764                       | (A/G)       |
| 40578       | CadSNP16173    | <i>Desi</i>      | Ca_Desig_denovo              | 12429137                       | (C/T)       |
| 40579       | CadSNP16174    | <i>Desi</i>      | Ca_Desig_denovo              | 12430431                       | (A/G)       |
| 40580       | CadSNP16175    | <i>Desi</i>      | Ca_Desig_denovo              | 12430455                       | (A/G)       |
| 40581       | CadSNP16176    | <i>Desi</i>      | Ca_Desig_denovo              | 12435774                       | (A/C)       |
| 40582       | CadSNP16177    | <i>Desi</i>      | Ca_Desig_denovo              | 12435775                       | (A/G)       |
| 40583       | CadSNP16178    | <i>Desi</i>      | Ca_Desig_denovo              | 12437011                       | (G/A)       |

| <b>S.N.</b> | <b>SNP IDs</b> | <b>Cultivars</b> | <b>Chromosomes/scaffolds</b> | <b>Physical positions (bp)</b> | <b>SNPs</b> |
|-------------|----------------|------------------|------------------------------|--------------------------------|-------------|
| 40584       | CadSNP16179    | <i>Desi</i>      | Ca_Desig_denovo              | 12437059                       | (C/T)       |
| 40585       | CadSNP16180    | <i>Desi</i>      | Ca_Desig_denovo              | 12440314                       | (A/G)       |
| 40586       | CadSNP16181    | <i>Desi</i>      | Ca_Desig_denovo              | 12440317                       | (G/A)       |
| 40587       | CadSNP16182    | <i>Desi</i>      | Ca_Desig_denovo              | 12444746                       | (A/G)       |
| 40588       | CadSNP16183    | <i>Desi</i>      | Ca_Desig_denovo              | 12446204                       | (T/G)       |
| 40589       | CadSNP16184    | <i>Desi</i>      | Ca_Desig_denovo              | 12448261                       | (C/A)       |
| 40590       | CadSNP16185    | <i>Desi</i>      | Ca_Desig_denovo              | 12448285                       | (G/C)       |
| 40591       | CadSNP16186    | <i>Desi</i>      | Ca_Desig_denovo              | 12467055                       | (C/T)       |
| 40592       | CadSNP16187    | <i>Desi</i>      | Ca_Desig_denovo              | 12467056                       | (G/T)       |
| 40593       | CadSNP16188    | <i>Desi</i>      | Ca_Desig_denovo              | 12477952                       | (T/C)       |
| 40594       | CadSNP16189    | <i>Desi</i>      | Ca_Desig_denovo              | 12481201                       | (A/C)       |
| 40595       | CadSNP16190    | <i>Desi</i>      | Ca_Desig_denovo              | 12481209                       | (C/G)       |
| 40596       | CadSNP16191    | <i>Desi</i>      | Ca_Desig_denovo              | 12482031                       | (C/T)       |
| 40597       | CadSNP16192    | <i>Desi</i>      | Ca_Desig_denovo              | 12483866                       | (T/C)       |
| 40598       | CadSNP16193    | <i>Desi</i>      | Ca_Desig_denovo              | 12483885                       | (G/A)       |
| 40599       | CadSNP16194    | <i>Desi</i>      | Ca_Desig_denovo              | 12490375                       | (G/C)       |
| 40600       | CadSNP16195    | <i>Desi</i>      | Ca_Desig_denovo              | 12491110                       | (A/C)       |
| 40601       | CadSNP16196    | <i>Desi</i>      | Ca_Desig_denovo              | 12494143                       | (C/T)       |
| 40602       | CadSNP16197    | <i>Desi</i>      | Ca_Desig_denovo              | 12497354                       | (C/A)       |
| 40603       | CadSNP16198    | <i>Desi</i>      | Ca_Desig_denovo              | 12497393                       | (A/G)       |
| 40604       | CadSNP16199    | <i>Desi</i>      | Ca_Desig_denovo              | 12499299                       | (C/T)       |
| 40605       | CadSNP16200    | <i>Desi</i>      | Ca_Desig_denovo              | 12516311                       | (T/G)       |
| 40606       | CadSNP16201    | <i>Desi</i>      | Ca_Desig_denovo              | 12517934                       | (C/T)       |
| 40607       | CadSNP16202    | <i>Desi</i>      | Ca_Desig_denovo              | 12517952                       | (T/C)       |
| 40608       | CadSNP16203    | <i>Desi</i>      | Ca_Desig_denovo              | 12522164                       | (T/G)       |
| 40609       | CadSNP16204    | <i>Desi</i>      | Ca_Desig_denovo              | 12529043                       | (C/T)       |
| 40610       | CadSNP16205    | <i>Desi</i>      | Ca_Desig_denovo              | 12535857                       | (G/A)       |
| 40611       | CadSNP16206    | <i>Desi</i>      | Ca_Desig_denovo              | 12536061                       | (G/A)       |
| 40612       | CadSNP16207    | <i>Desi</i>      | Ca_Desig_denovo              | 12537162                       | (T/C)       |
| 40613       | CadSNP16208    | <i>Desi</i>      | Ca_Desig_denovo              | 12543295                       | (A/G)       |
| 40614       | CadSNP16209    | <i>Desi</i>      | Ca_Desig_denovo              | 12545804                       | (T/C)       |
| 40615       | CadSNP16210    | <i>Desi</i>      | Ca_Desig_denovo              | 12545840                       | (T/C)       |
| 40616       | CadSNP16211    | <i>Desi</i>      | Ca_Desig_denovo              | 12545843                       | (C/T)       |
| 40617       | CadSNP16212    | <i>Desi</i>      | Ca_Desig_denovo              | 12556327                       | (G/A)       |
| 40618       | CadSNP16213    | <i>Desi</i>      | Ca_Desig_denovo              | 12556333                       | (G/A)       |
| 40619       | CadSNP16214    | <i>Desi</i>      | Ca_Desig_denovo              | 12568649                       | (C/A)       |
| 40620       | CadSNP16215    | <i>Desi</i>      | Ca_Desig_denovo              | 12571913                       | (G/A)       |
| 40621       | CadSNP16216    | <i>Desi</i>      | Ca_Desig_denovo              | 12572792                       | (G/T)       |

| <b>S.N.</b> | <b>SNP IDs</b> | <b>Cultivars</b> | <b>Chromosomes/scaffolds</b> | <b>Physical positions (bp)</b> | <b>SNPs</b> |
|-------------|----------------|------------------|------------------------------|--------------------------------|-------------|
| 40622       | CadSNP16217    | <i>Desi</i>      | Ca_Desig_denovo              | 12575580                       | (C/G)       |
| 40623       | CadSNP16218    | <i>Desi</i>      | Ca_Desig_denovo              | 12586420                       | (T/C)       |
| 40624       | CadSNP16219    | <i>Desi</i>      | Ca_Desig_denovo              | 12588115                       | (A/C)       |
| 40625       | CadSNP16220    | <i>Desi</i>      | Ca_Desig_denovo              | 12588156                       | (C/G)       |
| 40626       | CadSNP16221    | <i>Desi</i>      | Ca_Desig_denovo              | 12589568                       | (T/G)       |
| 40627       | CadSNP16222    | <i>Desi</i>      | Ca_Desig_denovo              | 12590008                       | (G/A)       |
| 40628       | CadSNP16223    | <i>Desi</i>      | Ca_Desig_denovo              | 12596369                       | (C/T)       |
| 40629       | CadSNP16224    | <i>Desi</i>      | Ca_Desig_denovo              | 12600597                       | (A/G)       |
| 40630       | CadSNP16225    | <i>Desi</i>      | Ca_Desig_denovo              | 12606451                       | (T/C)       |
| 40631       | CadSNP16226    | <i>Desi</i>      | Ca_Desig_denovo              | 12609823                       | (T/C)       |
| 40632       | CadSNP16227    | <i>Desi</i>      | Ca_Desig_denovo              | 12613814                       | (A/G)       |
| 40633       | CadSNP16228    | <i>Desi</i>      | Ca_Desig_denovo              | 12615422                       | (G/A)       |
| 40634       | CadSNP16229    | <i>Desi</i>      | Ca_Desig_denovo              | 12615449                       | (G/A)       |
| 40635       | CadSNP16230    | <i>Desi</i>      | Ca_Desig_denovo              | 12618066                       | (C/T)       |
| 40636       | CadSNP16231    | <i>Desi</i>      | Ca_Desig_denovo              | 12618299                       | (C/A)       |
| 40637       | CadSNP16232    | <i>Desi</i>      | Ca_Desig_denovo              | 12618728                       | (T/C)       |
| 40638       | CadSNP16233    | <i>Desi</i>      | Ca_Desig_denovo              | 12624037                       | (C/G)       |
| 40639       | CadSNP16234    | <i>Desi</i>      | Ca_Desig_denovo              | 12624318                       | (G/C)       |
| 40640       | CadSNP16235    | <i>Desi</i>      | Ca_Desig_denovo              | 12624330                       | (A/G)       |
| 40641       | CadSNP16236    | <i>Desi</i>      | Ca_Desig_denovo              | 12628690                       | (C/T)       |
| 40642       | CadSNP16237    | <i>Desi</i>      | Ca_Desig_denovo              | 12629687                       | (C/T)       |
| 40643       | CadSNP16238    | <i>Desi</i>      | Ca_Desig_denovo              | 12636210                       | (C/A)       |
| 40644       | CadSNP16239    | <i>Desi</i>      | Ca_Desig_denovo              | 12636241                       | (T/C)       |
| 40645       | CadSNP16240    | <i>Desi</i>      | Ca_Desig_denovo              | 12638541                       | (C/T)       |
| 40646       | CadSNP16241    | <i>Desi</i>      | Ca_Desig_denovo              | 12639415                       | (G/C)       |
| 40647       | CadSNP16242    | <i>Desi</i>      | Ca_Desig_denovo              | 12639445                       | (A/G)       |
| 40648       | CadSNP16243    | <i>Desi</i>      | Ca_Desig_denovo              | 12640714                       | (C/G)       |
| 40649       | CadSNP16244    | <i>Desi</i>      | Ca_Desig_denovo              | 12645544                       | (C/G)       |
| 40650       | CadSNP16245    | <i>Desi</i>      | Ca_Desig_denovo              | 12654278                       | (C/T)       |
| 40651       | CadSNP16246    | <i>Desi</i>      | Ca_Desig_denovo              | 12658965                       | (C/T)       |
| 40652       | CadSNP16247    | <i>Desi</i>      | Ca_Desig_denovo              | 12658968                       | (A/G)       |
| 40653       | CadSNP16248    | <i>Desi</i>      | Ca_Desig_denovo              | 12660027                       | (G/A)       |
| 40654       | CadSNP16249    | <i>Desi</i>      | Ca_Desig_denovo              | 12660041                       | (G/A)       |
| 40655       | CadSNP16250    | <i>Desi</i>      | Ca_Desig_denovo              | 12667269                       | (T/G)       |
| 40656       | CadSNP16251    | <i>Desi</i>      | Ca_Desig_denovo              | 12667279                       | (G/A)       |
| 40657       | CadSNP16252    | <i>Desi</i>      | Ca_Desig_denovo              | 12667329                       | (C/G)       |
| 40658       | CadSNP16253    | <i>Desi</i>      | Ca_Desig_denovo              | 12667478                       | (G/A)       |
| 40659       | CadSNP16254    | <i>Desi</i>      | Ca_Desig_denovo              | 12667501                       | (C/A)       |



| <b>S.N.</b> | <b>SNP IDs</b> | <b>Cultivars</b> | <b>Chromosomes/scaffolds</b> | <b>Physical positions (bp)</b> | <b>SNPs</b> |
|-------------|----------------|------------------|------------------------------|--------------------------------|-------------|
| 40660       | CadSNP16255    | <i>Desi</i>      | Ca_Desig_denovo              | 12669747                       | (G/T)       |
| 40661       | CadSNP16256    | <i>Desi</i>      | Ca_Desig_denovo              | 12671561                       | (A/G)       |
| 40662       | CadSNP16257    | <i>Desi</i>      | Ca_Desig_denovo              | 12672619                       | (G/T)       |
| 40663       | CadSNP16258    | <i>Desi</i>      | Ca_Desig_denovo              | 12672632                       | (T/C)       |
| 40664       | CadSNP16259    | <i>Desi</i>      | Ca_Desig_denovo              | 12678639                       | (G/T)       |
| 40665       | CadSNP16260    | <i>Desi</i>      | Ca_Desig_denovo              | 12678686                       | (T/G)       |
| 40666       | CadSNP16261    | <i>Desi</i>      | Ca_Desig_denovo              | 12683234                       | (G/C)       |
| 40667       | CadSNP16262    | <i>Desi</i>      | Ca_Desig_denovo              | 12686610                       | (A/G)       |
| 40668       | CadSNP16263    | <i>Desi</i>      | Ca_Desig_denovo              | 12696414                       | (A/G)       |
| 40669       | CadSNP16264    | <i>Desi</i>      | Ca_Desig_denovo              | 12696427                       | (G/C)       |
| 40670       | CadSNP16265    | <i>Desi</i>      | Ca_Desig_denovo              | 12698230                       | (A/G)       |
| 40671       | CadSNP16266    | <i>Desi</i>      | Ca_Desig_denovo              | 12704320                       | (C/G)       |
| 40672       | CadSNP16267    | <i>Desi</i>      | Ca_Desig_denovo              | 12726409                       | (A/G)       |
| 40673       | CadSNP16268    | <i>Desi</i>      | Ca_Desig_denovo              | 12726439                       | (G/A)       |
| 40674       | CadSNP16269    | <i>Desi</i>      | Ca_Desig_denovo              | 12730432                       | (C/T)       |
| 40675       | CadSNP16270    | <i>Desi</i>      | Ca_Desig_denovo              | 12731821                       | (C/G)       |
| 40676       | CadSNP16271    | <i>Desi</i>      | Ca_Desig_denovo              | 12731884                       | (C/T)       |
| 40677       | CadSNP16272    | <i>Desi</i>      | Ca_Desig_denovo              | 12732943                       | (G/A)       |
| 40678       | CadSNP16273    | <i>Desi</i>      | Ca_Desig_denovo              | 12732997                       | (C/T)       |
| 40679       | CadSNP16274    | <i>Desi</i>      | Ca_Desig_denovo              | 12735809                       | (T/C)       |
| 40680       | CadSNP16275    | <i>Desi</i>      | Ca_Desig_denovo              | 12740092                       | (C/T)       |
| 40681       | CadSNP16276    | <i>Desi</i>      | Ca_Desig_denovo              | 12744650                       | (G/A)       |
| 40682       | CadSNP16277    | <i>Desi</i>      | Ca_Desig_denovo              | 12744665                       | (T/C)       |
| 40683       | CadSNP16278    | <i>Desi</i>      | Ca_Desig_denovo              | 12767060                       | (C/T)       |
| 40684       | CadSNP16279    | <i>Desi</i>      | Ca_Desig_denovo              | 12767062                       | (C/G)       |
| 40685       | CadSNP16280    | <i>Desi</i>      | Ca_Desig_denovo              | 12768785                       | (G/T)       |
| 40686       | CadSNP16281    | <i>Desi</i>      | Ca_Desig_denovo              | 12787444                       | (G/C)       |
| 40687       | CadSNP16282    | <i>Desi</i>      | Ca_Desig_denovo              | 12787842                       | (T/C)       |
| 40688       | CadSNP16283    | <i>Desi</i>      | Ca_Desig_denovo              | 12787863                       | (G/A)       |
| 40689       | CadSNP16284    | <i>Desi</i>      | Ca_Desig_denovo              | 12791243                       | (A/G)       |
| 40690       | CadSNP16285    | <i>Desi</i>      | Ca_Desig_denovo              | 12791314                       | (T/C)       |
| 40691       | CadSNP16286    | <i>Desi</i>      | Ca_Desig_denovo              | 12793927                       | (G/C)       |
| 40692       | CadSNP16287    | <i>Desi</i>      | Ca_Desig_denovo              | 12795149                       | (C/G)       |
| 40693       | CadSNP16288    | <i>Desi</i>      | Ca_Desig_denovo              | 12795152                       | (C/G)       |
| 40694       | CadSNP16289    | <i>Desi</i>      | Ca_Desig_denovo              | 12798932                       | (C/G)       |
| 40695       | CadSNP16290    | <i>Desi</i>      | Ca_Desig_denovo              | 12798935                       | (T/C)       |
| 40696       | CadSNP16291    | <i>Desi</i>      | Ca_Desig_denovo              | 12801679                       | (A/G)       |
| 40697       | CadSNP16292    | <i>Desi</i>      | Ca_Desig_denovo              | 12802333                       | (A/G)       |

| <b>S.N.</b> | <b>SNP IDs</b> | <b>Cultivars</b> | <b>Chromosomes/scaffolds</b> | <b>Physical positions (bp)</b> | <b>SNPs</b> |
|-------------|----------------|------------------|------------------------------|--------------------------------|-------------|
| 40698       | CadSNP16293    | <i>Desi</i>      | Ca_Desig_denovo              | 12802364                       | (A/G)       |
| 40699       | CadSNP16294    | <i>Desi</i>      | Ca_Desig_denovo              | 12809924                       | (C/T)       |
| 40700       | CadSNP16295    | <i>Desi</i>      | Ca_Desig_denovo              | 12809927                       | (C/T)       |
| 40701       | CadSNP16296    | <i>Desi</i>      | Ca_Desig_denovo              | 12818578                       | (T/C)       |
| 40702       | CadSNP16297    | <i>Desi</i>      | Ca_Desig_denovo              | 12848015                       | (C/G)       |
| 40703       | CadSNP16298    | <i>Desi</i>      | Ca_Desig_denovo              | 12854099                       | (C/G)       |
| 40704       | CadSNP16299    | <i>Desi</i>      | Ca_Desig_denovo              | 12855362                       | (A/G)       |
| 40705       | CadSNP16300    | <i>Desi</i>      | Ca_Desig_denovo              | 12855377                       | (G/A)       |
| 40706       | CadSNP16301    | <i>Desi</i>      | Ca_Desig_denovo              | 12855576                       | (A/C)       |
| 40707       | CadSNP16302    | <i>Desi</i>      | Ca_Desig_denovo              | 12860443                       | (T/C)       |
| 40708       | CadSNP16303    | <i>Desi</i>      | Ca_Desig_denovo              | 12861034                       | (G/C)       |
| 40709       | CadSNP16304    | <i>Desi</i>      | Ca_Desig_denovo              | 12865527                       | (A/C)       |
| 40710       | CadSNP16305    | <i>Desi</i>      | Ca_Desig_denovo              | 12871267                       | (T/C)       |
| 40711       | CadSNP16306    | <i>Desi</i>      | Ca_Desig_denovo              | 12871276                       | (G/C)       |
| 40712       | CadSNP16307    | <i>Desi</i>      | Ca_Desig_denovo              | 12874029                       | (G/C)       |
| 40713       | CadSNP16308    | <i>Desi</i>      | Ca_Desig_denovo              | 12874064                       | (G/T)       |
| 40714       | CadSNP16309    | <i>Desi</i>      | Ca_Desig_denovo              | 12882761                       | (A/G)       |
| 40715       | CadSNP16310    | <i>Desi</i>      | Ca_Desig_denovo              | 12882786                       | (A/G)       |
| 40716       | CadSNP16311    | <i>Desi</i>      | Ca_Desig_denovo              | 12890086                       | (A/G)       |
| 40717       | CadSNP16312    | <i>Desi</i>      | Ca_Desig_denovo              | 12890102                       | (C/A)       |
| 40718       | CadSNP16313    | <i>Desi</i>      | Ca_Desig_denovo              | 12893910                       | (G/A)       |
| 40719       | CadSNP16314    | <i>Desi</i>      | Ca_Desig_denovo              | 12896444                       | (G/A)       |
| 40720       | CadSNP16315    | <i>Desi</i>      | Ca_Desig_denovo              | 12896456                       | (G/A)       |
| 40721       | CadSNP16316    | <i>Desi</i>      | Ca_Desig_denovo              | 12910549                       | (A/T)       |
| 40722       | CadSNP16317    | <i>Desi</i>      | Ca_Desig_denovo              | 12910579                       | (T/A)       |
| 40723       | CadSNP16318    | <i>Desi</i>      | Ca_Desig_denovo              | 12911894                       | (A/C)       |
| 40724       | CadSNP16319    | <i>Desi</i>      | Ca_Desig_denovo              | 12916192                       | (T/C)       |
| 40725       | CadSNP16320    | <i>Desi</i>      | Ca_Desig_denovo              | 12919962                       | (G/C)       |
| 40726       | CadSNP16321    | <i>Desi</i>      | Ca_Desig_denovo              | 12921099                       | (C/T)       |
| 40727       | CadSNP16322    | <i>Desi</i>      | Ca_Desig_denovo              | 12921113                       | (C/T)       |
| 40728       | CadSNP16323    | <i>Desi</i>      | Ca_Desig_denovo              | 12931459                       | (A/G)       |
| 40729       | CadSNP16324    | <i>Desi</i>      | Ca_Desig_denovo              | 12933454                       | (A/G)       |
| 40730       | CadSNP16325    | <i>Desi</i>      | Ca_Desig_denovo              | 12946173                       | (C/T)       |
| 40731       | CadSNP16326    | <i>Desi</i>      | Ca_Desig_denovo              | 12946215                       | (A/G)       |
| 40732       | CadSNP16327    | <i>Desi</i>      | Ca_Desig_denovo              | 12950091                       | (G/C)       |
| 40733       | CadSNP16328    | <i>Desi</i>      | Ca_Desig_denovo              | 12950537                       | (C/G)       |
| 40734       | CadSNP16329    | <i>Desi</i>      | Ca_Desig_denovo              | 12951022                       | (T/A)       |
| 40735       | CadSNP16330    | <i>Desi</i>      | Ca_Desig_denovo              | 12969457                       | (G/C)       |

| <b>S.N.</b> | <b>SNP IDs</b> | <b>Cultivars</b> | <b>Chromosomes/scaffolds</b> | <b>Physical positions (bp)</b> | <b>SNPs</b> |
|-------------|----------------|------------------|------------------------------|--------------------------------|-------------|
| 40736       | CadSNP16331    | <i>Desi</i>      | Ca_Desig_denovo              | 12969470                       | (A/T)       |
| 40737       | CadSNP16332    | <i>Desi</i>      | Ca_Desig_denovo              | 12975130                       | (T/C)       |
| 40738       | CadSNP16333    | <i>Desi</i>      | Ca_Desig_denovo              | 12975148                       | (A/C)       |
| 40739       | CadSNP16334    | <i>Desi</i>      | Ca_Desig_denovo              | 12976154                       | (G/C)       |
| 40740       | CadSNP16335    | <i>Desi</i>      | Ca_Desig_denovo              | 12976172                       | (T/G)       |
| 40741       | CadSNP16336    | <i>Desi</i>      | Ca_Desig_denovo              | 12979560                       | (T/G)       |
| 40742       | CadSNP16337    | <i>Desi</i>      | Ca_Desig_denovo              | 12979627                       | (T/C)       |
| 40743       | CadSNP16338    | <i>Desi</i>      | Ca_Desig_denovo              | 12980735                       | (A/G)       |
| 40744       | CadSNP16339    | <i>Desi</i>      | Ca_Desig_denovo              | 12982282                       | (T/C)       |
| 40745       | CadSNP16340    | <i>Desi</i>      | Ca_Desig_denovo              | 12982319                       | (G/C)       |
| 40746       | CadSNP16341    | <i>Desi</i>      | Ca_Desig_denovo              | 12984264                       | (C/T)       |
| 40747       | CadSNP16342    | <i>Desi</i>      | Ca_Desig_denovo              | 12993563                       | (G/A)       |
| 40748       | CadSNP16343    | <i>Desi</i>      | Ca_Desig_denovo              | 12994256                       | (A/G)       |
| 40749       | CadSNP16344    | <i>Desi</i>      | Ca_Desig_denovo              | 12999891                       | (C/A)       |
| 40750       | CadSNP16345    | <i>Desi</i>      | Ca_Desig_denovo              | 13000685                       | (G/T)       |
| 40751       | CadSNP16346    | <i>Desi</i>      | Ca_Desig_denovo              | 13000688                       | (G/A)       |
| 40752       | CadSNP16347    | <i>Desi</i>      | Ca_Desig_denovo              | 13003621                       | (C/T)       |
| 40753       | CadSNP16348    | <i>Desi</i>      | Ca_Desig_denovo              | 13003630                       | (C/G)       |
| 40754       | CadSNP16349    | <i>Desi</i>      | Ca_Desig_denovo              | 13004476                       | (G/C)       |
| 40755       | CadSNP16350    | <i>Desi</i>      | Ca_Desig_denovo              | 13004515                       | (G/T)       |
| 40756       | CadSNP16351    | <i>Desi</i>      | Ca_Desig_denovo              | 13004559                       | (C/G)       |
| 40757       | CadSNP16352    | <i>Desi</i>      | Ca_Desig_denovo              | 13005513                       | (C/G)       |
| 40758       | CadSNP16353    | <i>Desi</i>      | Ca_Desig_denovo              | 13008858                       | (T/C)       |
| 40759       | CadSNP16354    | <i>Desi</i>      | Ca_Desig_denovo              | 13011271                       | (C/T)       |
| 40760       | CadSNP16355    | <i>Desi</i>      | Ca_Desig_denovo              | 13018172                       | (T/C)       |
| 40761       | CadSNP16356    | <i>Desi</i>      | Ca_Desig_denovo              | 13018180                       | (G/A)       |
| 40762       | CadSNP16357    | <i>Desi</i>      | Ca_Desig_denovo              | 13022151                       | (G/C)       |
| 40763       | CadSNP16358    | <i>Desi</i>      | Ca_Desig_denovo              | 13022541                       | (G/T)       |
| 40764       | CadSNP16359    | <i>Desi</i>      | Ca_Desig_denovo              | 13022549                       | (C/T)       |
| 40765       | CadSNP16360    | <i>Desi</i>      | Ca_Desig_denovo              | 13022734                       | (A/G)       |
| 40766       | CadSNP16361    | <i>Desi</i>      | Ca_Desig_denovo              | 13023743                       | (A/G)       |
| 40767       | CadSNP16362    | <i>Desi</i>      | Ca_Desig_denovo              | 13026506                       | (C/A)       |
| 40768       | CadSNP16363    | <i>Desi</i>      | Ca_Desig_denovo              | 13026507                       | (T/G)       |
| 40769       | CadSNP16364    | <i>Desi</i>      | Ca_Desig_denovo              | 13036713                       | (A/G)       |
| 40770       | CadSNP16365    | <i>Desi</i>      | Ca_Desig_denovo              | 13036773                       | (C/A)       |
| 40771       | CadSNP16366    | <i>Desi</i>      | Ca_Desig_denovo              | 13045049                       | (G/A)       |
| 40772       | CadSNP16367    | <i>Desi</i>      | Ca_Desig_denovo              | 13049438                       | (A/C)       |
| 40773       | CadSNP16368    | <i>Desi</i>      | Ca_Desig_denovo              | 13049456                       | (G/A)       |

| <b>S.N.</b> | <b>SNP IDs</b> | <b>Cultivars</b> | <b>Chromosomes/scaffolds</b> | <b>Physical positions (bp)</b> | <b>SNPs</b> |
|-------------|----------------|------------------|------------------------------|--------------------------------|-------------|
| 40774       | CadSNP16369    | <i>Desi</i>      | Ca_Desig_denovo              | 13062115                       | (T/G)       |
| 40775       | CadSNP16370    | <i>Desi</i>      | Ca_Desig_denovo              | 13072649                       | (A/T)       |
| 40776       | CadSNP16371    | <i>Desi</i>      | Ca_Desig_denovo              | 13073003                       | (C/A)       |
| 40777       | CadSNP16372    | <i>Desi</i>      | Ca_Desig_denovo              | 13074800                       | (C/T)       |
| 40778       | CadSNP16373    | <i>Desi</i>      | Ca_Desig_denovo              | 13094629                       | (T/C)       |
| 40779       | CadSNP16374    | <i>Desi</i>      | Ca_Desig_denovo              | 13094668                       | (C/T)       |
| 40780       | CadSNP16375    | <i>Desi</i>      | Ca_Desig_denovo              | 13098769                       | (G/T)       |
| 40781       | CadSNP16376    | <i>Desi</i>      | Ca_Desig_denovo              | 13100587                       | (C/T)       |
| 40782       | CadSNP16377    | <i>Desi</i>      | Ca_Desig_denovo              | 13101486                       | (C/T)       |
| 40783       | CadSNP16378    | <i>Desi</i>      | Ca_Desig_denovo              | 13101487                       | (G/A)       |
| 40784       | CadSNP16379    | <i>Desi</i>      | Ca_Desig_denovo              | 13110175                       | (T/C)       |
| 40785       | CadSNP16380    | <i>Desi</i>      | Ca_Desig_denovo              | 13110202                       | (C/G)       |
| 40786       | CadSNP16381    | <i>Desi</i>      | Ca_Desig_denovo              | 13115921                       | (C/G)       |
| 40787       | CadSNP16382    | <i>Desi</i>      | Ca_Desig_denovo              | 13119899                       | (G/C)       |
| 40788       | CadSNP16383    | <i>Desi</i>      | Ca_Desig_denovo              | 13127702                       | (G/A)       |
| 40789       | CadSNP16384    | <i>Desi</i>      | Ca_Desig_denovo              | 13127720                       | (C/G)       |
| 40790       | CadSNP16385    | <i>Desi</i>      | Ca_Desig_denovo              | 13131983                       | (G/T)       |
| 40791       | CadSNP16386    | <i>Desi</i>      | Ca_Desig_denovo              | 13131989                       | (A/C)       |
| 40792       | CadSNP16387    | <i>Desi</i>      | Ca_Desig_denovo              | 13134413                       | (C/T)       |
| 40793       | CadSNP16388    | <i>Desi</i>      | Ca_Desig_denovo              | 13134482                       | (A/C)       |
| 40794       | CadSNP16389    | <i>Desi</i>      | Ca_Desig_denovo              | 13134484                       | (A/T)       |
| 40795       | CadSNP16390    | <i>Desi</i>      | Ca_Desig_denovo              | 13138749                       | (T/C)       |
| 40796       | CadSNP16391    | <i>Desi</i>      | Ca_Desig_denovo              | 13138756                       | (C/A)       |
| 40797       | CadSNP16392    | <i>Desi</i>      | Ca_Desig_denovo              | 13139431                       | (C/T)       |
| 40798       | CadSNP16393    | <i>Desi</i>      | Ca_Desig_denovo              | 13141950                       | (C/T)       |
| 40799       | CadSNP16394    | <i>Desi</i>      | Ca_Desig_denovo              | 13141958                       | (C/A)       |
| 40800       | CadSNP16395    | <i>Desi</i>      | Ca_Desig_denovo              | 13143435                       | (G/C)       |
| 40801       | CadSNP16396    | <i>Desi</i>      | Ca_Desig_denovo              | 13143474                       | (A/G)       |
| 40802       | CadSNP16397    | <i>Desi</i>      | Ca_Desig_denovo              | 13143484                       | (C/G)       |
| 40803       | CadSNP16398    | <i>Desi</i>      | Ca_Desig_denovo              | 13154418                       | (T/C)       |
| 40804       | CadSNP16399    | <i>Desi</i>      | Ca_Desig_denovo              | 13154460                       | (T/A)       |
| 40805       | CadSNP16400    | <i>Desi</i>      | Ca_Desig_denovo              | 13159355                       | (C/G)       |
| 40806       | CadSNP16401    | <i>Desi</i>      | Ca_Desig_denovo              | 13159964                       | (A/C)       |
| 40807       | CadSNP16402    | <i>Desi</i>      | Ca_Desig_denovo              | 13159966                       | (A/C)       |
| 40808       | CadSNP16403    | <i>Desi</i>      | Ca_Desig_denovo              | 13162590                       | (C/T)       |
| 40809       | CadSNP16404    | <i>Desi</i>      | Ca_Desig_denovo              | 13167119                       | (G/T)       |
| 40810       | CadSNP16405    | <i>Desi</i>      | Ca_Desig_denovo              | 13167337                       | (C/T)       |
| 40811       | CadSNP16406    | <i>Desi</i>      | Ca_Desig_denovo              | 13167367                       | (T/C)       |

| <b>S.N.</b> | <b>SNP IDs</b> | <b>Cultivars</b> | <b>Chromosomes/scaffolds</b> | <b>Physical positions (bp)</b> | <b>SNPs</b> |
|-------------|----------------|------------------|------------------------------|--------------------------------|-------------|
| 40812       | CadSNP16407    | <i>Desi</i>      | Ca_Desig_denovo              | 13168636                       | (C/A)       |
| 40813       | CadSNP16408    | <i>Desi</i>      | Ca_Desig_denovo              | 13173238                       | (A/G)       |
| 40814       | CadSNP16409    | <i>Desi</i>      | Ca_Desig_denovo              | 13176583                       | (T/C)       |
| 40815       | CadSNP16410    | <i>Desi</i>      | Ca_Desig_denovo              | 13176602                       | (C/T)       |
| 40816       | CadSNP16411    | <i>Desi</i>      | Ca_Desig_denovo              | 13179706                       | (T/C)       |
| 40817       | CadSNP16412    | <i>Desi</i>      | Ca_Desig_denovo              | 13181321                       | (A/G)       |
| 40818       | CadSNP16413    | <i>Desi</i>      | Ca_Desig_denovo              | 13184059                       | (G/C)       |
| 40819       | CadSNP16414    | <i>Desi</i>      | Ca_Desig_denovo              | 13187997                       | (T/C)       |
| 40820       | CadSNP16415    | <i>Desi</i>      | Ca_Desig_denovo              | 13190440                       | (C/G)       |
| 40821       | CadSNP16416    | <i>Desi</i>      | Ca_Desig_denovo              | 13191175                       | (T/C)       |
| 40822       | CadSNP16417    | <i>Desi</i>      | Ca_Desig_denovo              | 13191182                       | (G/A)       |
| 40823       | CadSNP16418    | <i>Desi</i>      | Ca_Desig_denovo              | 13192946                       | (T/A)       |
| 40824       | CadSNP16419    | <i>Desi</i>      | Ca_Desig_denovo              | 13195405                       | (A/G)       |
| 40825       | CadSNP16420    | <i>Desi</i>      | Ca_Desig_denovo              | 13195443                       | (A/T)       |
| 40826       | CadSNP16421    | <i>Desi</i>      | Ca_Desig_denovo              | 13196939                       | (A/G)       |
| 40827       | CadSNP16422    | <i>Desi</i>      | Ca_Desig_denovo              | 13196960                       | (C/T)       |
| 40828       | CadSNP16423    | <i>Desi</i>      | Ca_Desig_denovo              | 13196963                       | (A/G)       |
| 40829       | CadSNP16424    | <i>Desi</i>      | Ca_Desig_denovo              | 13198674                       | (C/G)       |
| 40830       | CadSNP16425    | <i>Desi</i>      | Ca_Desig_denovo              | 13198692                       | (C/T)       |
| 40831       | CadSNP16426    | <i>Desi</i>      | Ca_Desig_denovo              | 13207272                       | (G/A)       |
| 40832       | CadSNP16427    | <i>Desi</i>      | Ca_Desig_denovo              | 13207810                       | (A/G)       |
| 40833       | CadSNP16428    | <i>Desi</i>      | Ca_Desig_denovo              | 13207849                       | (C/T)       |
| 40834       | CadSNP16429    | <i>Desi</i>      | Ca_Desig_denovo              | 13209644                       | (T/C)       |
| 40835       | CadSNP16430    | <i>Desi</i>      | Ca_Desig_denovo              | 13218679                       | (A/C)       |
| 40836       | CadSNP16431    | <i>Desi</i>      | Ca_Desig_denovo              | 13218685                       | (T/C)       |
| 40837       | CadSNP16432    | <i>Desi</i>      | Ca_Desig_denovo              | 13227520                       | (T/C)       |
| 40838       | CadSNP16433    | <i>Desi</i>      | Ca_Desig_denovo              | 13227544                       | (T/C)       |
| 40839       | CadSNP16434    | <i>Desi</i>      | Ca_Desig_denovo              | 13239745                       | (A/T)       |
| 40840       | CadSNP16435    | <i>Desi</i>      | Ca_Desig_denovo              | 13242674                       | (G/T)       |
| 40841       | CadSNP16436    | <i>Desi</i>      | Ca_Desig_denovo              | 13244054                       | (T/A)       |
| 40842       | CadSNP16437    | <i>Desi</i>      | Ca_Desig_denovo              | 13244069                       | (C/G)       |
| 40843       | CadSNP16438    | <i>Desi</i>      | Ca_Desig_denovo              | 13248080                       | (G/C)       |
| 40844       | CadSNP16439    | <i>Desi</i>      | Ca_Desig_denovo              | 13251739                       | (A/G)       |
| 40845       | CadSNP16440    | <i>Desi</i>      | Ca_Desig_denovo              | 13255965                       | (G/C)       |
| 40846       | CadSNP16441    | <i>Desi</i>      | Ca_Desig_denovo              | 13256649                       | (T/C)       |
| 40847       | CadSNP16442    | <i>Desi</i>      | Ca_Desig_denovo              | 13259827                       | (T/C)       |
| 40848       | CadSNP16443    | <i>Desi</i>      | Ca_Desig_denovo              | 13259830                       | (C/T)       |
| 40849       | CadSNP16444    | <i>Desi</i>      | Ca_Desig_denovo              | 13264334                       | (G/A)       |

| <b>S.N.</b> | <b>SNP IDs</b> | <b>Cultivars</b> | <b>Chromosomes/scaffolds</b> | <b>Physical positions (bp)</b> | <b>SNPs</b> |
|-------------|----------------|------------------|------------------------------|--------------------------------|-------------|
| 40850       | CadSNP16445    | <i>Desi</i>      | Ca_Desig_denovo              | 13264405                       | (C/G)       |
| 40851       | CadSNP16446    | <i>Desi</i>      | Ca_Desig_denovo              | 13266277                       | (C/G)       |
| 40852       | CadSNP16447    | <i>Desi</i>      | Ca_Desig_denovo              | 13266279                       | (A/G)       |
| 40853       | CadSNP16448    | <i>Desi</i>      | Ca_Desig_denovo              | 13270758                       | (C/T)       |
| 40854       | CadSNP16449    | <i>Desi</i>      | Ca_Desig_denovo              | 13271767                       | (T/C)       |
| 40855       | CadSNP16450    | <i>Desi</i>      | Ca_Desig_denovo              | 13271770                       | (T/C)       |
| 40856       | CadSNP16451    | <i>Desi</i>      | Ca_Desig_denovo              | 13272797                       | (A/G)       |
| 40857       | CadSNP16452    | <i>Desi</i>      | Ca_Desig_denovo              | 13272826                       | (C/T)       |
| 40858       | CadSNP16453    | <i>Desi</i>      | Ca_Desig_denovo              | 13273824                       | (C/T)       |
| 40859       | CadSNP16454    | <i>Desi</i>      | Ca_Desig_denovo              | 13275325                       | (G/T)       |
| 40860       | CadSNP16455    | <i>Desi</i>      | Ca_Desig_denovo              | 13278758                       | (A/G)       |
| 40861       | CadSNP16456    | <i>Desi</i>      | Ca_Desig_denovo              | 13279861                       | (T/A)       |
| 40862       | CadSNP16457    | <i>Desi</i>      | Ca_Desig_denovo              | 13279918                       | (C/T)       |
| 40863       | CadSNP16458    | <i>Desi</i>      | Ca_Desig_denovo              | 13285163                       | (T/A)       |
| 40864       | CadSNP16459    | <i>Desi</i>      | Ca_Desig_denovo              | 13290482                       | (C/G)       |
| 40865       | CadSNP16460    | <i>Desi</i>      | Ca_Desig_denovo              | 13300178                       | (A/G)       |
| 40866       | CadSNP16461    | <i>Desi</i>      | Ca_Desig_denovo              | 13300180                       | (G/A)       |
| 40867       | CadSNP16462    | <i>Desi</i>      | Ca_Desig_denovo              | 13302847                       | (A/G)       |
| 40868       | CadSNP16463    | <i>Desi</i>      | Ca_Desig_denovo              | 13302850                       | (G/A)       |
| 40869       | CadSNP16464    | <i>Desi</i>      | Ca_Desig_denovo              | 13307946                       | (C/G)       |
| 40870       | CadSNP16465    | <i>Desi</i>      | Ca_Desig_denovo              | 13313818                       | (C/G)       |
| 40871       | CadSNP16466    | <i>Desi</i>      | Ca_Desig_denovo              | 13320149                       | (T/C)       |
| 40872       | CadSNP16467    | <i>Desi</i>      | Ca_Desig_denovo              | 13320173                       | (C/A)       |
| 40873       | CadSNP16468    | <i>Desi</i>      | Ca_Desig_denovo              | 13323195                       | (G/A)       |
| 40874       | CadSNP16469    | <i>Desi</i>      | Ca_Desig_denovo              | 13323225                       | (A/G)       |
| 40875       | CadSNP16470    | <i>Desi</i>      | Ca_Desig_denovo              | 13323246                       | (A/G)       |
| 40876       | CadSNP16471    | <i>Desi</i>      | Ca_Desig_denovo              | 13324250                       | (G/C)       |
| 40877       | CadSNP16472    | <i>Desi</i>      | Ca_Desig_denovo              | 13330231                       | (G/A)       |
| 40878       | CadSNP16473    | <i>Desi</i>      | Ca_Desig_denovo              | 13341187                       | (T/C)       |
| 40879       | CadSNP16474    | <i>Desi</i>      | Ca_Desig_denovo              | 13344230                       | (T/C)       |
| 40880       | CadSNP16475    | <i>Desi</i>      | Ca_Desig_denovo              | 13344242                       | (T/C)       |
| 40881       | CadSNP16476    | <i>Desi</i>      | Ca_Desig_denovo              | 13346665                       | (A/T)       |
| 40882       | CadSNP16477    | <i>Desi</i>      | Ca_Desig_denovo              | 13354277                       | (A/G)       |
| 40883       | CadSNP16478    | <i>Desi</i>      | Ca_Desig_denovo              | 13355842                       | (C/T)       |
| 40884       | CadSNP16479    | <i>Desi</i>      | Ca_Desig_denovo              | 13360706                       | (T/G)       |
| 40885       | CadSNP16480    | <i>Desi</i>      | Ca_Desig_denovo              | 13363662                       | (C/G)       |
| 40886       | CadSNP16481    | <i>Desi</i>      | Ca_Desig_denovo              | 13363727                       | (A/G)       |
| 40887       | CadSNP16482    | <i>Desi</i>      | Ca_Desig_denovo              | 13369445                       | (G/A)       |

| <b>S.N.</b> | <b>SNP IDs</b> | <b>Cultivars</b> | <b>Chromosomes/scaffolds</b> | <b>Physical positions (bp)</b> | <b>SNPs</b> |
|-------------|----------------|------------------|------------------------------|--------------------------------|-------------|
| 40888       | CadSNP16483    | <i>Desi</i>      | Ca_Desig_denovo              | 13369451                       | (C/T)       |
| 40889       | CadSNP16484    | <i>Desi</i>      | Ca_Desig_denovo              | 13371668                       | (A/G)       |
| 40890       | CadSNP16485    | <i>Desi</i>      | Ca_Desig_denovo              | 13371704                       | (T/A)       |
| 40891       | CadSNP16486    | <i>Desi</i>      | Ca_Desig_denovo              | 13377116                       | (T/G)       |
| 40892       | CadSNP16487    | <i>Desi</i>      | Ca_Desig_denovo              | 13389067                       | (T/G)       |
| 40893       | CadSNP16488    | <i>Desi</i>      | Ca_Desig_denovo              | 13397909                       | (G/A)       |
| 40894       | CadSNP16489    | <i>Desi</i>      | Ca_Desig_denovo              | 13397917                       | (C/T)       |
| 40895       | CadSNP16490    | <i>Desi</i>      | Ca_Desig_denovo              | 13400100                       | (T/G)       |
| 40896       | CadSNP16491    | <i>Desi</i>      | Ca_Desig_denovo              | 13400602                       | (T/C)       |
| 40897       | CadSNP16492    | <i>Desi</i>      | Ca_Desig_denovo              | 13409677                       | (A/T)       |
| 40898       | CadSNP16493    | <i>Desi</i>      | Ca_Desig_denovo              | 13409692                       | (A/T)       |
| 40899       | CadSNP16494    | <i>Desi</i>      | Ca_Desig_denovo              | 13409694                       | (C/G)       |
| 40900       | CadSNP16495    | <i>Desi</i>      | Ca_Desig_denovo              | 13409702                       | (C/G)       |
| 40901       | CadSNP16496    | <i>Desi</i>      | Ca_Desig_denovo              | 13410811                       | (T/C)       |
| 40902       | CadSNP16497    | <i>Desi</i>      | Ca_Desig_denovo              | 13410814                       | (A/G)       |
| 40903       | CadSNP16498    | <i>Desi</i>      | Ca_Desig_denovo              | 13411465                       | (C/T)       |
| 40904       | CadSNP16499    | <i>Desi</i>      | Ca_Desig_denovo              | 13413437                       | (G/A)       |
| 40905       | CadSNP16500    | <i>Desi</i>      | Ca_Desig_denovo              | 13413443                       | (G/C)       |
| 40906       | CadSNP16501    | <i>Desi</i>      | Ca_Desig_denovo              | 13417798                       | (T/C)       |
| 40907       | CadSNP16502    | <i>Desi</i>      | Ca_Desig_denovo              | 13417807                       | (G/T)       |
| 40908       | CadSNP16503    | <i>Desi</i>      | Ca_Desig_denovo              | 13424201                       | (C/G)       |
| 40909       | CadSNP16504    | <i>Desi</i>      | Ca_Desig_denovo              | 13428836                       | (G/A)       |
| 40910       | CadSNP16505    | <i>Desi</i>      | Ca_Desig_denovo              | 13428892                       | (T/C)       |
| 40911       | CadSNP16506    | <i>Desi</i>      | Ca_Desig_denovo              | 13433671                       | (C/T)       |
| 40912       | CadSNP16507    | <i>Desi</i>      | Ca_Desig_denovo              | 13433752                       | (C/A)       |
| 40913       | CadSNP16508    | <i>Desi</i>      | Ca_Desig_denovo              | 13438699                       | (T/C)       |
| 40914       | CadSNP16509    | <i>Desi</i>      | Ca_Desig_denovo              | 13438731                       | (G/A)       |
| 40915       | CadSNP16510    | <i>Desi</i>      | Ca_Desig_denovo              | 13441881                       | (G/A)       |
| 40916       | CadSNP16511    | <i>Desi</i>      | Ca_Desig_denovo              | 13451472                       | (G/T)       |
| 40917       | CadSNP16512    | <i>Desi</i>      | Ca_Desig_denovo              | 13451510                       | (T/A)       |
| 40918       | CadSNP16513    | <i>Desi</i>      | Ca_Desig_denovo              | 13455612                       | (A/C)       |
| 40919       | CadSNP16514    | <i>Desi</i>      | Ca_Desig_denovo              | 13455613                       | (G/C)       |
| 40920       | CadSNP16515    | <i>Desi</i>      | Ca_Desig_denovo              | 13460818                       | (A/C)       |
| 40921       | CadSNP16516    | <i>Desi</i>      | Ca_Desig_denovo              | 13462258                       | (T/C)       |
| 40922       | CadSNP16517    | <i>Desi</i>      | Ca_Desig_denovo              | 13464749                       | (C/T)       |
| 40923       | CadSNP16518    | <i>Desi</i>      | Ca_Desig_denovo              | 13473968                       | (G/A)       |
| 40924       | CadSNP16519    | <i>Desi</i>      | Ca_Desig_denovo              | 13474706                       | (A/G)       |
| 40925       | CadSNP16520    | <i>Desi</i>      | Ca_Desig_denovo              | 13483294                       | (A/G)       |

| <b>S.N.</b> | <b>SNP IDs</b> | <b>Cultivars</b> | <b>Chromosomes/scaffolds</b> | <b>Physical positions (bp)</b> | <b>SNPs</b> |
|-------------|----------------|------------------|------------------------------|--------------------------------|-------------|
| 40926       | CadSNP16521    | <i>Desi</i>      | Ca_Desig_denovo              | 13483321                       | (A/G)       |
| 40927       | CadSNP16522    | <i>Desi</i>      | Ca_Desig_denovo              | 13491923                       | (T/G)       |
| 40928       | CadSNP16523    | <i>Desi</i>      | Ca_Desig_denovo              | 13491944                       | (C/T)       |
| 40929       | CadSNP16524    | <i>Desi</i>      | Ca_Desig_denovo              | 13492028                       | (T/C)       |
| 40930       | CadSNP16525    | <i>Desi</i>      | Ca_Desig_denovo              | 13492069                       | (A/G)       |
| 40931       | CadSNP16526    | <i>Desi</i>      | Ca_Desig_denovo              | 13492530                       | (A/C)       |
| 40932       | CadSNP16527    | <i>Desi</i>      | Ca_Desig_denovo              | 13495279                       | (G/C)       |
| 40933       | CadSNP16528    | <i>Desi</i>      | Ca_Desig_denovo              | 13501775                       | (T/C)       |
| 40934       | CadSNP16529    | <i>Desi</i>      | Ca_Desig_denovo              | 13505224                       | (C/G)       |
| 40935       | CadSNP16530    | <i>Desi</i>      | Ca_Desig_denovo              | 13509286                       | (A/G)       |
| 40936       | CadSNP16531    | <i>Desi</i>      | Ca_Desig_denovo              | 13512817                       | (G/A)       |
| 40937       | CadSNP16532    | <i>Desi</i>      | Ca_Desig_denovo              | 13512856                       | (C/G)       |
| 40938       | CadSNP16533    | <i>Desi</i>      | Ca_Desig_denovo              | 13517467                       | (T/C)       |
| 40939       | CadSNP16534    | <i>Desi</i>      | Ca_Desig_denovo              | 13517497                       | (C/G)       |
| 40940       | CadSNP16535    | <i>Desi</i>      | Ca_Desig_denovo              | 13523237                       | (C/T)       |
| 40941       | CadSNP16536    | <i>Desi</i>      | Ca_Desig_denovo              | 13531327                       | (A/G)       |
| 40942       | CadSNP16537    | <i>Desi</i>      | Ca_Desig_denovo              | 13532815                       | (A/G)       |
| 40943       | CadSNP16538    | <i>Desi</i>      | Ca_Desig_denovo              | 13539583                       | (T/C)       |
| 40944       | CadSNP16539    | <i>Desi</i>      | Ca_Desig_denovo              | 13545691                       | (C/T)       |
| 40945       | CadSNP16540    | <i>Desi</i>      | Ca_Desig_denovo              | 13547603                       | (G/A)       |
| 40946       | CadSNP16541    | <i>Desi</i>      | Ca_Desig_denovo              | 13563977                       | (C/T)       |
| 40947       | CadSNP16542    | <i>Desi</i>      | Ca_Desig_denovo              | 13565485                       | (T/C)       |
| 40948       | CadSNP16543    | <i>Desi</i>      | Ca_Desig_denovo              | 13567988                       | (C/G)       |
| 40949       | CadSNP16544    | <i>Desi</i>      | Ca_Desig_denovo              | 13569482                       | (A/G)       |
| 40950       | CadSNP16545    | <i>Desi</i>      | Ca_Desig_denovo              | 13569519                       | (A/G)       |
| 40951       | CadSNP16546    | <i>Desi</i>      | Ca_Desig_denovo              | 13572350                       | (A/G)       |
| 40952       | CadSNP16547    | <i>Desi</i>      | Ca_Desig_denovo              | 13577596                       | (A/G)       |
| 40953       | CadSNP16548    | <i>Desi</i>      | Ca_Desig_denovo              | 13580004                       | (C/A)       |
| 40954       | CadSNP16549    | <i>Desi</i>      | Ca_Desig_denovo              | 13581013                       | (A/G)       |
| 40955       | CadSNP16550    | <i>Desi</i>      | Ca_Desig_denovo              | 13581035                       | (C/T)       |
| 40956       | CadSNP16551    | <i>Desi</i>      | Ca_Desig_denovo              | 13581407                       | (A/G)       |
| 40957       | CadSNP16552    | <i>Desi</i>      | Ca_Desig_denovo              | 13586589                       | (T/C)       |
| 40958       | CadSNP16553    | <i>Desi</i>      | Ca_Desig_denovo              | 13586591                       | (T/G)       |
| 40959       | CadSNP16554    | <i>Desi</i>      | Ca_Desig_denovo              | 13592813                       | (G/T)       |
| 40960       | CadSNP16555    | <i>Desi</i>      | Ca_Desig_denovo              | 13595291                       | (A/G)       |
| 40961       | CadSNP16556    | <i>Desi</i>      | Ca_Desig_denovo              | 13597917                       | (G/C)       |
| 40962       | CadSNP16557    | <i>Desi</i>      | Ca_Desig_denovo              | 13620217                       | (G/C)       |
| 40963       | CadSNP16558    | <i>Desi</i>      | Ca_Desig_denovo              | 13625728                       | (C/G)       |



| <b>S.N.</b> | <b>SNP IDs</b> | <b>Cultivars</b> | <b>Chromosomes/scaffolds</b> | <b>Physical positions (bp)</b> | <b>SNPs</b> |
|-------------|----------------|------------------|------------------------------|--------------------------------|-------------|
| 40964       | CadSNP16559    | <i>Desi</i>      | Ca_Desig_denovo              | 13628971                       | (A/C)       |
| 40965       | CadSNP16560    | <i>Desi</i>      | Ca_Desig_denovo              | 13636064                       | (G/A)       |
| 40966       | CadSNP16561    | <i>Desi</i>      | Ca_Desig_denovo              | 13636072                       | (A/G)       |
| 40967       | CadSNP16562    | <i>Desi</i>      | Ca_Desig_denovo              | 13644730                       | (T/C)       |
| 40968       | CadSNP16563    | <i>Desi</i>      | Ca_Desig_denovo              | 13644757                       | (T/C)       |
| 40969       | CadSNP16564    | <i>Desi</i>      | Ca_Desig_denovo              | 13646377                       | (G/C)       |
| 40970       | CadSNP16565    | <i>Desi</i>      | Ca_Desig_denovo              | 13650204                       | (G/C)       |
| 40971       | CadSNP16566    | <i>Desi</i>      | Ca_Desig_denovo              | 13656259                       | (G/A)       |
| 40972       | CadSNP16567    | <i>Desi</i>      | Ca_Desig_denovo              | 13656265                       | (C/T)       |
| 40973       | CadSNP16568    | <i>Desi</i>      | Ca_Desig_denovo              | 13657527                       | (C/G)       |
| 40974       | CadSNP16569    | <i>Desi</i>      | Ca_Desig_denovo              | 13657941                       | (G/C)       |
| 40975       | CadSNP16570    | <i>Desi</i>      | Ca_Desig_denovo              | 13657955                       | (C/G)       |
| 40976       | CadSNP16571    | <i>Desi</i>      | Ca_Desig_denovo              | 13669150                       | (T/C)       |
| 40977       | CadSNP16572    | <i>Desi</i>      | Ca_Desig_denovo              | 13669185                       | (T/C)       |
| 40978       | CadSNP16573    | <i>Desi</i>      | Ca_Desig_denovo              | 13673474                       | (C/G)       |
| 40979       | CadSNP16574    | <i>Desi</i>      | Ca_Desig_denovo              | 13673480                       | (C/G)       |
| 40980       | CadSNP16575    | <i>Desi</i>      | Ca_Desig_denovo              | 13685951                       | (T/G)       |
| 40981       | CadSNP16576    | <i>Desi</i>      | Ca_Desig_denovo              | 13685972                       | (C/T)       |
| 40982       | CadSNP16577    | <i>Desi</i>      | Ca_Desig_denovo              | 13689983                       | (G/T)       |
| 40983       | CadSNP16578    | <i>Desi</i>      | Ca_Desig_denovo              | 13690616                       | (A/C)       |
| 40984       | CadSNP16579    | <i>Desi</i>      | Ca_Desig_denovo              | 13693340                       | (C/T)       |
| 40985       | CadSNP16580    | <i>Desi</i>      | Ca_Desig_denovo              | 13709632                       | (G/C)       |
| 40986       | CadSNP16581    | <i>Desi</i>      | Ca_Desig_denovo              | 13709674                       | (A/C)       |
| 40987       | CadSNP16582    | <i>Desi</i>      | Ca_Desig_denovo              | 13711888                       | (C/A)       |
| 40988       | CadSNP16583    | <i>Desi</i>      | Ca_Desig_denovo              | 13711897                       | (T/C)       |
| 40989       | CadSNP16584    | <i>Desi</i>      | Ca_Desig_denovo              | 13715426                       | (G/A)       |
| 40990       | CadSNP16585    | <i>Desi</i>      | Ca_Desig_denovo              | 13715455                       | (G/A)       |
| 40991       | CadSNP16586    | <i>Desi</i>      | Ca_Desig_denovo              | 13718627                       | (T/C)       |
| 40992       | CadSNP16587    | <i>Desi</i>      | Ca_Desig_denovo              | 13718676                       | (G/C)       |
| 40993       | CadSNP16588    | <i>Desi</i>      | Ca_Desig_denovo              | 13718680                       | (C/T)       |
| 40994       | CadSNP16589    | <i>Desi</i>      | Ca_Desig_denovo              | 13722890                       | (A/C)       |
| 40995       | CadSNP16590    | <i>Desi</i>      | Ca_Desig_denovo              | 13722891                       | (G/T)       |
| 40996       | CadSNP16591    | <i>Desi</i>      | Ca_Desig_denovo              | 13722892                       | (A/G)       |
| 40997       | CadSNP16592    | <i>Desi</i>      | Ca_Desig_denovo              | 13731140                       | (T/C)       |
| 40998       | CadSNP16593    | <i>Desi</i>      | Ca_Desig_denovo              | 13731146                       | (T/G)       |
| 40999       | CadSNP16594    | <i>Desi</i>      | Ca_Desig_denovo              | 13734082                       | (C/G)       |
| 41000       | CadSNP16595    | <i>Desi</i>      | Ca_Desig_denovo              | 13738803                       | (C/T)       |
| 41001       | CadSNP16596    | <i>Desi</i>      | Ca_Desig_denovo              | 13740120                       | (C/A)       |

| <b>S.N.</b> | <b>SNP IDs</b> | <b>Cultivars</b> | <b>Chromosomes/scaffolds</b> | <b>Physical positions (bp)</b> | <b>SNPs</b> |
|-------------|----------------|------------------|------------------------------|--------------------------------|-------------|
| 41002       | CadSNP16597    | <i>Desi</i>      | Ca_Desig_denovo              | 13740126                       | (G/C)       |
| 41003       | CadSNP16598    | <i>Desi</i>      | Ca_Desig_denovo              | 13753433                       | (G/C)       |
| 41004       | CadSNP16599    | <i>Desi</i>      | Ca_Desig_denovo              | 13753464                       | (A/G)       |
| 41005       | CadSNP16600    | <i>Desi</i>      | Ca_Desig_denovo              | 13754407                       | (A/G)       |
| 41006       | CadSNP16601    | <i>Desi</i>      | Ca_Desig_denovo              | 13754419                       | (G/C)       |
| 41007       | CadSNP16602    | <i>Desi</i>      | Ca_Desig_denovo              | 13754567                       | (G/A)       |
| 41008       | CadSNP16603    | <i>Desi</i>      | Ca_Desig_denovo              | 13754575                       | (C/T)       |
| 41009       | CadSNP16604    | <i>Desi</i>      | Ca_Desig_denovo              | 13754971                       | (C/T)       |
| 41010       | CadSNP16605    | <i>Desi</i>      | Ca_Desig_denovo              | 13754977                       | (A/G)       |
| 41011       | CadSNP16606    | <i>Desi</i>      | Ca_Desig_denovo              | 13765038                       | (C/T)       |
| 41012       | CadSNP16607    | <i>Desi</i>      | Ca_Desig_denovo              | 13765106                       | (T/C)       |
| 41013       | CadSNP16608    | <i>Desi</i>      | Ca_Desig_denovo              | 13769434                       | (A/G)       |
| 41014       | CadSNP16609    | <i>Desi</i>      | Ca_Desig_denovo              | 13770268                       | (T/G)       |
| 41015       | CadSNP16610    | <i>Desi</i>      | Ca_Desig_denovo              | 13770919                       | (C/T)       |
| 41016       | CadSNP16611    | <i>Desi</i>      | Ca_Desig_denovo              | 13777521                       | (G/T)       |
| 41017       | CadSNP16612    | <i>Desi</i>      | Ca_Desig_denovo              | 13777561                       | (G/A)       |
| 41018       | CadSNP16613    | <i>Desi</i>      | Ca_Desig_denovo              | 13782913                       | (T/C)       |
| 41019       | CadSNP16614    | <i>Desi</i>      | Ca_Desig_denovo              | 13782952                       | (G/T)       |
| 41020       | CadSNP16615    | <i>Desi</i>      | Ca_Desig_denovo              | 13808579                       | (G/T)       |
| 41021       | CadSNP16616    | <i>Desi</i>      | Ca_Desig_denovo              | 13810723                       | (T/C)       |
| 41022       | CadSNP16617    | <i>Desi</i>      | Ca_Desig_denovo              | 13810744                       | (C/T)       |
| 41023       | CadSNP16618    | <i>Desi</i>      | Ca_Desig_denovo              | 13812257                       | (A/G)       |
| 41024       | CadSNP16619    | <i>Desi</i>      | Ca_Desig_denovo              | 13818338                       | (T/C)       |
| 41025       | CadSNP16620    | <i>Desi</i>      | Ca_Desig_denovo              | 13818382                       | (A/G)       |
| 41026       | CadSNP16621    | <i>Desi</i>      | Ca_Desig_denovo              | 13818383                       | (A/G)       |
| 41027       | CadSNP16622    | <i>Desi</i>      | Ca_Desig_denovo              | 13818389                       | (C/G)       |
| 41028       | CadSNP16623    | <i>Desi</i>      | Ca_Desig_denovo              | 13822811                       | (C/T)       |
| 41029       | CadSNP16624    | <i>Desi</i>      | Ca_Desig_denovo              | 13822841                       | (A/T)       |
| 41030       | CadSNP16625    | <i>Desi</i>      | Ca_Desig_denovo              | 13827908                       | (G/A)       |
| 41031       | CadSNP16626    | <i>Desi</i>      | Ca_Desig_denovo              | 13827959                       | (G/C)       |
| 41032       | CadSNP16627    | <i>Desi</i>      | Ca_Desig_denovo              | 13830378                       | (C/G)       |
| 41033       | CadSNP16628    | <i>Desi</i>      | Ca_Desig_denovo              | 13830810                       | (C/T)       |
| 41034       | CadSNP16629    | <i>Desi</i>      | Ca_Desig_denovo              | 13833770                       | (T/C)       |
| 41035       | CadSNP16630    | <i>Desi</i>      | Ca_Desig_denovo              | 13833815                       | (C/T)       |
| 41036       | CadSNP16631    | <i>Desi</i>      | Ca_Desig_denovo              | 13836642                       | (T/C)       |
| 41037       | CadSNP16632    | <i>Desi</i>      | Ca_Desig_denovo              | 13836712                       | (A/G)       |
| 41038       | CadSNP16633    | <i>Desi</i>      | Ca_Desig_denovo              | 13845137                       | (A/G)       |
| 41039       | CadSNP16634    | <i>Desi</i>      | Ca_Desig_denovo              | 13845152                       | (G/A)       |

| <b>S.N.</b> | <b>SNP IDs</b> | <b>Cultivars</b> | <b>Chromosomes/scaffolds</b> | <b>Physical positions (bp)</b> | <b>SNPs</b> |
|-------------|----------------|------------------|------------------------------|--------------------------------|-------------|
| 41040       | CadSNP16635    | <i>Desi</i>      | Ca_Desig_denovo              | 13847148                       | (G/C)       |
| 41041       | CadSNP16636    | <i>Desi</i>      | Ca_Desig_denovo              | 13847207                       | (A/G)       |
| 41042       | CadSNP16637    | <i>Desi</i>      | Ca_Desig_denovo              | 13855100                       | (T/G)       |
| 41043       | CadSNP16638    | <i>Desi</i>      | Ca_Desig_denovo              | 13859266                       | (A/G)       |
| 41044       | CadSNP16639    | <i>Desi</i>      | Ca_Desig_denovo              | 13859281                       | (A/G)       |
| 41045       | CadSNP16640    | <i>Desi</i>      | Ca_Desig_denovo              | 13869768                       | (C/T)       |
| 41046       | CadSNP16641    | <i>Desi</i>      | Ca_Desig_denovo              | 13869778                       | (A/G)       |
| 41047       | CadSNP16642    | <i>Desi</i>      | Ca_Desig_denovo              | 13876396                       | (T/C)       |
| 41048       | CadSNP16643    | <i>Desi</i>      | Ca_Desig_denovo              | 13878051                       | (C/T)       |
| 41049       | CadSNP16644    | <i>Desi</i>      | Ca_Desig_denovo              | 13880332                       | (A/C)       |
| 41050       | CadSNP16645    | <i>Desi</i>      | Ca_Desig_denovo              | 13890516                       | (G/C)       |
| 41051       | CadSNP16646    | <i>Desi</i>      | Ca_Desig_denovo              | 13894307                       | (G/A)       |
| 41052       | CadSNP16647    | <i>Desi</i>      | Ca_Desig_denovo              | 13894380                       | (T/A)       |
| 41053       | CadSNP16648    | <i>Desi</i>      | Ca_Desig_denovo              | 13900718                       | (C/T)       |
| 41054       | CadSNP16649    | <i>Desi</i>      | Ca_Desig_denovo              | 13900733                       | (G/C)       |
| 41055       | CadSNP16650    | <i>Desi</i>      | Ca_Desig_denovo              | 13903520                       | (G/C)       |
| 41056       | CadSNP16651    | <i>Desi</i>      | Ca_Desig_denovo              | 13903559                       | (C/T)       |
| 41057       | CadSNP16652    | <i>Desi</i>      | Ca_Desig_denovo              | 13906769                       | (T/C)       |
| 41058       | CadSNP16653    | <i>Desi</i>      | Ca_Desig_denovo              | 13908746                       | (T/C)       |
| 41059       | CadSNP16654    | <i>Desi</i>      | Ca_Desig_denovo              | 13908904                       | (T/C)       |
| 41060       | CadSNP16655    | <i>Desi</i>      | Ca_Desig_denovo              | 13908940                       | (C/T)       |
| 41061       | CadSNP16656    | <i>Desi</i>      | Ca_Desig_denovo              | 13911512                       | (A/G)       |
| 41062       | CadSNP16657    | <i>Desi</i>      | Ca_Desig_denovo              | 13912024                       | (G/T)       |
| 41063       | CadSNP16658    | <i>Desi</i>      | Ca_Desig_denovo              | 13913108                       | (T/C)       |
| 41064       | CadSNP16659    | <i>Desi</i>      | Ca_Desig_denovo              | 13913135                       | (C/G)       |
| 41065       | CadSNP16660    | <i>Desi</i>      | Ca_Desig_denovo              | 13923412                       | (T/C)       |
| 41066       | CadSNP16661    | <i>Desi</i>      | Ca_Desig_denovo              | 13923439                       | (C/T)       |
| 41067       | CadSNP16662    | <i>Desi</i>      | Ca_Desig_denovo              | 13933943                       | (C/T)       |
| 41068       | CadSNP16663    | <i>Desi</i>      | Ca_Desig_denovo              | 13934003                       | (C/T)       |
| 41069       | CadSNP16664    | <i>Desi</i>      | Ca_Desig_denovo              | 13937382                       | (G/A)       |
| 41070       | CadSNP16665    | <i>Desi</i>      | Ca_Desig_denovo              | 13937437                       | (C/G)       |
| 41071       | CadSNP16666    | <i>Desi</i>      | Ca_Desig_denovo              | 13940459                       | (A/G)       |
| 41072       | CadSNP16667    | <i>Desi</i>      | Ca_Desig_denovo              | 13940465                       | (C/T)       |
| 41073       | CadSNP16668    | <i>Desi</i>      | Ca_Desig_denovo              | 13941460                       | (A/G)       |
| 41074       | CadSNP16669    | <i>Desi</i>      | Ca_Desig_denovo              | 13962662                       | (G/A)       |
| 41075       | CadSNP16670    | <i>Desi</i>      | Ca_Desig_denovo              | 13962679                       | (C/T)       |
| 41076       | CadSNP16671    | <i>Desi</i>      | Ca_Desig_denovo              | 13964626                       | (C/A)       |
| 41077       | CadSNP16672    | <i>Desi</i>      | Ca_Desig_denovo              | 13966624                       | (T/G)       |

| <b>S.N.</b> | <b>SNP IDs</b> | <b>Cultivars</b> | <b>Chromosomes/scaffolds</b> | <b>Physical positions (bp)</b> | <b>SNPs</b> |
|-------------|----------------|------------------|------------------------------|--------------------------------|-------------|
| 41078       | CadSNP16673    | <i>Desi</i>      | Ca_Desig_denovo              | 13970583                       | (C/T)       |
| 41079       | CadSNP16674    | <i>Desi</i>      | Ca_Desig_denovo              | 13970620                       | (T/C)       |
| 41080       | CadSNP16675    | <i>Desi</i>      | Ca_Desig_denovo              | 13988316                       | (T/G)       |
| 41081       | CadSNP16676    | <i>Desi</i>      | Ca_Desig_denovo              | 13988368                       | (G/A)       |
| 41082       | CadSNP16677    | <i>Desi</i>      | Ca_Desig_denovo              | 13988392                       | (T/C)       |
| 41083       | CadSNP16678    | <i>Desi</i>      | Ca_Desig_denovo              | 13994214                       | (T/C)       |
| 41084       | CadSNP16679    | <i>Desi</i>      | Ca_Desig_denovo              | 13999300                       | (G/C)       |
| 41085       | CadSNP16680    | <i>Desi</i>      | Ca_Desig_denovo              | 13999375                       | (T/C)       |
| 41086       | CadSNP16681    | <i>Desi</i>      | Ca_Desig_denovo              | 14016547                       | (G/A)       |
| 41087       | CadSNP16682    | <i>Desi</i>      | Ca_Desig_denovo              | 14018204                       | (C/A)       |
| 41088       | CadSNP16683    | <i>Desi</i>      | Ca_Desig_denovo              | 14018213                       | (G/C)       |
| 41089       | CadSNP16684    | <i>Desi</i>      | Ca_Desig_denovo              | 14025531                       | (G/T)       |
| 41090       | CadSNP16685    | <i>Desi</i>      | Ca_Desig_denovo              | 14025550                       | (G/A)       |
| 41091       | CadSNP16686    | <i>Desi</i>      | Ca_Desig_denovo              | 14029797                       | (A/T)       |
| 41092       | CadSNP16687    | <i>Desi</i>      | Ca_Desig_denovo              | 14036816                       | (T/C)       |
| 41093       | CadSNP16688    | <i>Desi</i>      | Ca_Desig_denovo              | 14039870                       | (C/T)       |
| 41094       | CadSNP16689    | <i>Desi</i>      | Ca_Desig_denovo              | 14039883                       | (A/G)       |
| 41095       | CadSNP16690    | <i>Desi</i>      | Ca_Desig_denovo              | 14040005                       | (T/G)       |
| 41096       | CadSNP16691    | <i>Desi</i>      | Ca_Desig_denovo              | 14046996                       | (C/T)       |
| 41097       | CadSNP16692    | <i>Desi</i>      | Ca_Desig_denovo              | 14049281                       | (A/G)       |
| 41098       | CadSNP16693    | <i>Desi</i>      | Ca_Desig_denovo              | 14052130                       | (G/C)       |
| 41099       | CadSNP16694    | <i>Desi</i>      | Ca_Desig_denovo              | 14065915                       | (A/C)       |
| 41100       | CadSNP16695    | <i>Desi</i>      | Ca_Desig_denovo              | 14065933                       | (C/G)       |
| 41101       | CadSNP16696    | <i>Desi</i>      | Ca_Desig_denovo              | 14066027                       | (G/A)       |
| 41102       | CadSNP16697    | <i>Desi</i>      | Ca_Desig_denovo              | 14067465                       | (T/C)       |
| 41103       | CadSNP16698    | <i>Desi</i>      | Ca_Desig_denovo              | 14067507                       | (A/C)       |
| 41104       | CadSNP16699    | <i>Desi</i>      | Ca_Desig_denovo              | 14077075                       | (G/T)       |
| 41105       | CadSNP16700    | <i>Desi</i>      | Ca_Desig_denovo              | 14081852                       | (T/C)       |
| 41106       | CadSNP16701    | <i>Desi</i>      | Ca_Desig_denovo              | 14082828                       | (T/C)       |
| 41107       | CadSNP16702    | <i>Desi</i>      | Ca_Desig_denovo              | 14088964                       | (A/G)       |
| 41108       | CadSNP16703    | <i>Desi</i>      | Ca_Desig_denovo              | 14088965                       | (C/A)       |
| 41109       | CadSNP16704    | <i>Desi</i>      | Ca_Desig_denovo              | 14094722                       | (G/A)       |
| 41110       | CadSNP16705    | <i>Desi</i>      | Ca_Desig_denovo              | 14097718                       | (T/C)       |
| 41111       | CadSNP16706    | <i>Desi</i>      | Ca_Desig_denovo              | 14098893                       | (A/C)       |
| 41112       | CadSNP16707    | <i>Desi</i>      | Ca_Desig_denovo              | 14098894                       | (A/G)       |
| 41113       | CadSNP16708    | <i>Desi</i>      | Ca_Desig_denovo              | 14107096                       | (T/A)       |
| 41114       | CadSNP16709    | <i>Desi</i>      | Ca_Desig_denovo              | 14107126                       | (G/A)       |
| 41115       | CadSNP16710    | <i>Desi</i>      | Ca_Desig_denovo              | 14108387                       | (T/C)       |

| <b>S.N.</b> | <b>SNP IDs</b> | <b>Cultivars</b> | <b>Chromosomes/scaffolds</b> | <b>Physical positions (bp)</b> | <b>SNPs</b> |
|-------------|----------------|------------------|------------------------------|--------------------------------|-------------|
| 41116       | CadSNP16711    | <i>Desi</i>      | Ca_Desig_denovo              | 14108405                       | (A/G)       |
| 41117       | CadSNP16712    | <i>Desi</i>      | Ca_Desig_denovo              | 14111489                       | (G/A)       |
| 41118       | CadSNP16713    | <i>Desi</i>      | Ca_Desig_denovo              | 14124409                       | (C/T)       |
| 41119       | CadSNP16714    | <i>Desi</i>      | Ca_Desig_denovo              | 14130911                       | (G/A)       |
| 41120       | CadSNP16715    | <i>Desi</i>      | Ca_Desig_denovo              | 14133705                       | (G/A)       |
| 41121       | CadSNP16716    | <i>Desi</i>      | Ca_Desig_denovo              | 14133706                       | (G/A)       |
| 41122       | CadSNP16717    | <i>Desi</i>      | Ca_Desig_denovo              | 14137923                       | (G/A)       |
| 41123       | CadSNP16718    | <i>Desi</i>      | Ca_Desig_denovo              | 14137953                       | (G/A)       |
| 41124       | CadSNP16719    | <i>Desi</i>      | Ca_Desig_denovo              | 14140910                       | (C/T)       |
| 41125       | CadSNP16720    | <i>Desi</i>      | Ca_Desig_denovo              | 14144037                       | (T/C)       |
| 41126       | CadSNP16721    | <i>Desi</i>      | Ca_Desig_denovo              | 14150794                       | (T/C)       |
| 41127       | CadSNP16722    | <i>Desi</i>      | Ca_Desig_denovo              | 14150797                       | (G/C)       |
| 41128       | CadSNP16723    | <i>Desi</i>      | Ca_Desig_denovo              | 14153242                       | (A/T)       |
| 41129       | CadSNP16724    | <i>Desi</i>      | Ca_Desig_denovo              | 14155648                       | (C/T)       |
| 41130       | CadSNP16725    | <i>Desi</i>      | Ca_Desig_denovo              | 14158529                       | (C/A)       |
| 41131       | CadSNP16726    | <i>Desi</i>      | Ca_Desig_denovo              | 14158595                       | (A/G)       |
| 41132       | CadSNP16727    | <i>Desi</i>      | Ca_Desig_denovo              | 14160033                       | (C/G)       |
| 41133       | CadSNP16728    | <i>Desi</i>      | Ca_Desig_denovo              | 14160058                       | (C/T)       |
| 41134       | CadSNP16729    | <i>Desi</i>      | Ca_Desig_denovo              | 14168540                       | (G/A)       |
| 41135       | CadSNP16730    | <i>Desi</i>      | Ca_Desig_denovo              | 14171368                       | (G/A)       |
| 41136       | CadSNP16731    | <i>Desi</i>      | Ca_Desig_denovo              | 14173029                       | (A/G)       |
| 41137       | CadSNP16732    | <i>Desi</i>      | Ca_Desig_denovo              | 14173049                       | (A/G)       |
| 41138       | CadSNP16733    | <i>Desi</i>      | Ca_Desig_denovo              | 14173050                       | (C/G)       |
| 41139       | CadSNP16734    | <i>Desi</i>      | Ca_Desig_denovo              | 14182603                       | (G/C)       |
| 41140       | CadSNP16735    | <i>Desi</i>      | Ca_Desig_denovo              | 14182622                       | (C/G)       |
| 41141       | CadSNP16736    | <i>Desi</i>      | Ca_Desig_denovo              | 14183660                       | (A/G)       |
| 41142       | CadSNP16737    | <i>Desi</i>      | Ca_Desig_denovo              | 14183703                       | (G/A)       |
| 41143       | CadSNP16738    | <i>Desi</i>      | Ca_Desig_denovo              | 14185025                       | (T/C)       |
| 41144       | CadSNP16739    | <i>Desi</i>      | Ca_Desig_denovo              | 14185070                       | (A/G)       |
| 41145       | CadSNP16740    | <i>Desi</i>      | Ca_Desig_denovo              | 14185325                       | (A/G)       |
| 41146       | CadSNP16741    | <i>Desi</i>      | Ca_Desig_denovo              | 14186738                       | (G/A)       |
| 41147       | CadSNP16742    | <i>Desi</i>      | Ca_Desig_denovo              | 14188093                       | (C/G)       |
| 41148       | CadSNP16743    | <i>Desi</i>      | Ca_Desig_denovo              | 14188142                       | (A/G)       |
| 41149       | CadSNP16744    | <i>Desi</i>      | Ca_Desig_denovo              | 14206047                       | (T/C)       |
| 41150       | CadSNP16745    | <i>Desi</i>      | Ca_Desig_denovo              | 14216867                       | (A/G)       |
| 41151       | CadSNP16746    | <i>Desi</i>      | Ca_Desig_denovo              | 14216869                       | (T/C)       |
| 41152       | CadSNP16747    | <i>Desi</i>      | Ca_Desig_denovo              | 14223579                       | (G/C)       |
| 41153       | CadSNP16748    | <i>Desi</i>      | Ca_Desig_denovo              | 14223606                       | (A/G)       |

| <b>S.N.</b> | <b>SNP IDs</b> | <b>Cultivars</b> | <b>Chromosomes/scaffolds</b> | <b>Physical positions (bp)</b> | <b>SNPs</b> |
|-------------|----------------|------------------|------------------------------|--------------------------------|-------------|
| 41154       | CadSNP16749    | <i>Desi</i>      | Ca_Desig_denovo              | 14230927                       | (A/G)       |
| 41155       | CadSNP16750    | <i>Desi</i>      | Ca_Desig_denovo              | 14239355                       | (A/G)       |
| 41156       | CadSNP16751    | <i>Desi</i>      | Ca_Desig_denovo              | 14239367                       | (G/A)       |
| 41157       | CadSNP16752    | <i>Desi</i>      | Ca_Desig_denovo              | 14242779                       | (C/A)       |
| 41158       | CadSNP16753    | <i>Desi</i>      | Ca_Desig_denovo              | 14245308                       | (C/T)       |
| 41159       | CadSNP16754    | <i>Desi</i>      | Ca_Desig_denovo              | 14246214                       | (C/T)       |
| 41160       | CadSNP16755    | <i>Desi</i>      | Ca_Desig_denovo              | 14255161                       | (G/C)       |
| 41161       | CadSNP16756    | <i>Desi</i>      | Ca_Desig_denovo              | 14260444                       | (A/G)       |
| 41162       | CadSNP16757    | <i>Desi</i>      | Ca_Desig_denovo              | 14260504                       | (C/T)       |
| 41163       | CadSNP16758    | <i>Desi</i>      | Ca_Desig_denovo              | 14260907                       | (A/G)       |
| 41164       | CadSNP16759    | <i>Desi</i>      | Ca_Desig_denovo              | 14260916                       | (T/C)       |
| 41165       | CadSNP16760    | <i>Desi</i>      | Ca_Desig_denovo              | 14281108                       | (C/G)       |
| 41166       | CadSNP16761    | <i>Desi</i>      | Ca_Desig_denovo              | 14284905                       | (C/T)       |
| 41167       | CadSNP16762    | <i>Desi</i>      | Ca_Desig_denovo              | 14284944                       | (A/G)       |
| 41168       | CadSNP16763    | <i>Desi</i>      | Ca_Desig_denovo              | 14285427                       | (T/G)       |
| 41169       | CadSNP16764    | <i>Desi</i>      | Ca_Desig_denovo              | 14288177                       | (G/A)       |
| 41170       | CadSNP16765    | <i>Desi</i>      | Ca_Desig_denovo              | 14289285                       | (A/G)       |
| 41171       | CadSNP16766    | <i>Desi</i>      | Ca_Desig_denovo              | 14291892                       | (G/C)       |
| 41172       | CadSNP16767    | <i>Desi</i>      | Ca_Desig_denovo              | 14292625                       | (C/T)       |
| 41173       | CadSNP16768    | <i>Desi</i>      | Ca_Desig_denovo              | 14292674                       | (G/T)       |
| 41174       | CadSNP16769    | <i>Desi</i>      | Ca_Desig_denovo              | 14294873                       | (T/A)       |
| 41175       | CadSNP16770    | <i>Desi</i>      | Ca_Desig_denovo              | 14299936                       | (G/A)       |
| 41176       | CadSNP16771    | <i>Desi</i>      | Ca_Desig_denovo              | 14299958                       | (A/C)       |
| 41177       | CadSNP16772    | <i>Desi</i>      | Ca_Desig_denovo              | 14299960                       | (A/C)       |
| 41178       | CadSNP16773    | <i>Desi</i>      | Ca_Desig_denovo              | 14302767                       | (G/T)       |
| 41179       | CadSNP16774    | <i>Desi</i>      | Ca_Desig_denovo              | 14302785                       | (C/T)       |
| 41180       | CadSNP16775    | <i>Desi</i>      | Ca_Desig_denovo              | 14305750                       | (C/T)       |
| 41181       | CadSNP16776    | <i>Desi</i>      | Ca_Desig_denovo              | 14311779                       | (G/T)       |
| 41182       | CadSNP16777    | <i>Desi</i>      | Ca_Desig_denovo              | 14311827                       | (C/T)       |
| 41183       | CadSNP16778    | <i>Desi</i>      | Ca_Desig_denovo              | 14313265                       | (C/T)       |
| 41184       | CadSNP16779    | <i>Desi</i>      | Ca_Desig_denovo              | 14321681                       | (C/G)       |
| 41185       | CadSNP16780    | <i>Desi</i>      | Ca_Desig_denovo              | 14323900                       | (C/T)       |
| 41186       | CadSNP16781    | <i>Desi</i>      | Ca_Desig_denovo              | 14325450                       | (A/G)       |
| 41187       | CadSNP16782    | <i>Desi</i>      | Ca_Desig_denovo              | 14325519                       | (A/G)       |
| 41188       | CadSNP16783    | <i>Desi</i>      | Ca_Desig_denovo              | 14330833                       | (T/C)       |
| 41189       | CadSNP16784    | <i>Desi</i>      | Ca_Desig_denovo              | 14335088                       | (T/C)       |
| 41190       | CadSNP16785    | <i>Desi</i>      | Ca_Desig_denovo              | 14335395                       | (A/T)       |
| 41191       | CadSNP16786    | <i>Desi</i>      | Ca_Desig_denovo              | 14335416                       | (C/T)       |

| <b>S.N.</b> | <b>SNP IDs</b> | <b>Cultivars</b> | <b>Chromosomes/scaffolds</b> | <b>Physical positions (bp)</b> | <b>SNPs</b> |
|-------------|----------------|------------------|------------------------------|--------------------------------|-------------|
| 41192       | CadSNP16787    | <i>Desi</i>      | Ca_Desig_denovo              | 14340517                       | (A/G)       |
| 41193       | CadSNP16788    | <i>Desi</i>      | Ca_Desig_denovo              | 14350382                       | (G/C)       |
| 41194       | CadSNP16789    | <i>Desi</i>      | Ca_Desig_denovo              | 14350418                       | (G/A)       |
| 41195       | CadSNP16790    | <i>Desi</i>      | Ca_Desig_denovo              | 14350691                       | (C/T)       |
| 41196       | CadSNP16791    | <i>Desi</i>      | Ca_Desig_denovo              | 14358656                       | (C/T)       |
| 41197       | CadSNP16792    | <i>Desi</i>      | Ca_Desig_denovo              | 14358713                       | (G/A)       |
| 41198       | CadSNP16793    | <i>Desi</i>      | Ca_Desig_denovo              | 14360911                       | (C/T)       |
| 41199       | CadSNP16794    | <i>Desi</i>      | Ca_Desig_denovo              | 14363316                       | (C/G)       |
| 41200       | CadSNP16795    | <i>Desi</i>      | Ca_Desig_denovo              | 14367842                       | (A/G)       |
| 41201       | CadSNP16796    | <i>Desi</i>      | Ca_Desig_denovo              | 14373671                       | (T/C)       |
| 41202       | CadSNP16797    | <i>Desi</i>      | Ca_Desig_denovo              | 14375968                       | (T/C)       |
| 41203       | CadSNP16798    | <i>Desi</i>      | Ca_Desig_denovo              | 14391884                       | (T/C)       |
| 41204       | CadSNP16799    | <i>Desi</i>      | Ca_Desig_denovo              | 14391900                       | (A/G)       |
| 41205       | CadSNP16800    | <i>Desi</i>      | Ca_Desig_denovo              | 14397713                       | (A/G)       |
| 41206       | CadSNP16801    | <i>Desi</i>      | Ca_Desig_denovo              | 14397775                       | (C/T)       |
| 41207       | CadSNP16802    | <i>Desi</i>      | Ca_Desig_denovo              | 14406286                       | (A/G)       |
| 41208       | CadSNP16803    | <i>Desi</i>      | Ca_Desig_denovo              | 14406326                       | (G/A)       |
| 41209       | CadSNP16804    | <i>Desi</i>      | Ca_Desig_denovo              | 14406460                       | (T/C)       |
| 41210       | CadSNP16805    | <i>Desi</i>      | Ca_Desig_denovo              | 14408063                       | (G/A)       |
| 41211       | CadSNP16806    | <i>Desi</i>      | Ca_Desig_denovo              | 14408245                       | (T/C)       |
| 41212       | CadSNP16807    | <i>Desi</i>      | Ca_Desig_denovo              | 14415472                       | (C/A)       |
| 41213       | CadSNP16808    | <i>Desi</i>      | Ca_Desig_denovo              | 14418214                       | (T/C)       |
| 41214       | CadSNP16809    | <i>Desi</i>      | Ca_Desig_denovo              | 14418229                       | (G/T)       |
| 41215       | CadSNP16810    | <i>Desi</i>      | Ca_Desig_denovo              | 14423445                       | (G/A)       |
| 41216       | CadSNP16811    | <i>Desi</i>      | Ca_Desig_denovo              | 14423836                       | (A/C)       |
| 41217       | CadSNP16812    | <i>Desi</i>      | Ca_Desig_denovo              | 14427570                       | (A/G)       |
| 41218       | CadSNP16813    | <i>Desi</i>      | Ca_Desig_denovo              | 14430846                       | (A/G)       |
| 41219       | CadSNP16814    | <i>Desi</i>      | Ca_Desig_denovo              | 14432524                       | (T/G)       |
| 41220       | CadSNP16815    | <i>Desi</i>      | Ca_Desig_denovo              | 14437698                       | (G/C)       |
| 41221       | CadSNP16816    | <i>Desi</i>      | Ca_Desig_denovo              | 14437713                       | (A/G)       |
| 41222       | CadSNP16817    | <i>Desi</i>      | Ca_Desig_denovo              | 14441285                       | (G/A)       |
| 41223       | CadSNP16818    | <i>Desi</i>      | Ca_Desig_denovo              | 14443872                       | (C/A)       |
| 41224       | CadSNP16819    | <i>Desi</i>      | Ca_Desig_denovo              | 14451173                       | (A/G)       |
| 41225       | CadSNP16820    | <i>Desi</i>      | Ca_Desig_denovo              | 14461049                       | (G/T)       |
| 41226       | CadSNP16821    | <i>Desi</i>      | Ca_Desig_denovo              | 14461807                       | (C/T)       |
| 41227       | CadSNP16822    | <i>Desi</i>      | Ca_Desig_denovo              | 14461829                       | (G/A)       |
| 41228       | CadSNP16823    | <i>Desi</i>      | Ca_Desig_denovo              | 14468133                       | (G/A)       |
| 41229       | CadSNP16824    | <i>Desi</i>      | Ca_Desig_denovo              | 14468145                       | (G/A)       |

| <b>S.N.</b> | <b>SNP IDs</b> | <b>Cultivars</b> | <b>Chromosomes/scaffolds</b> | <b>Physical positions (bp)</b> | <b>SNPs</b> |
|-------------|----------------|------------------|------------------------------|--------------------------------|-------------|
| 41230       | CadSNP16825    | <i>Desi</i>      | Ca_Desig_denovo              | 14471509                       | (T/C)       |
| 41231       | CadSNP16826    | <i>Desi</i>      | Ca_Desig_denovo              | 14471525                       | (T/C)       |
| 41232       | CadSNP16827    | <i>Desi</i>      | Ca_Desig_denovo              | 14474535                       | (C/G)       |
| 41233       | CadSNP16828    | <i>Desi</i>      | Ca_Desig_denovo              | 14474565                       | (A/G)       |
| 41234       | CadSNP16829    | <i>Desi</i>      | Ca_Desig_denovo              | 14477409                       | (C/G)       |
| 41235       | CadSNP16830    | <i>Desi</i>      | Ca_Desig_denovo              | 14481293                       | (C/T)       |
| 41236       | CadSNP16831    | <i>Desi</i>      | Ca_Desig_denovo              | 14482531                       | (G/C)       |
| 41237       | CadSNP16832    | <i>Desi</i>      | Ca_Desig_denovo              | 14482600                       | (G/C)       |
| 41238       | CadSNP16833    | <i>Desi</i>      | Ca_Desig_denovo              | 14488115                       | (C/T)       |
| 41239       | CadSNP16834    | <i>Desi</i>      | Ca_Desig_denovo              | 14492129                       | (A/G)       |
| 41240       | CadSNP16835    | <i>Desi</i>      | Ca_Desig_denovo              | 14493135                       | (C/G)       |
| 41241       | CadSNP16836    | <i>Desi</i>      | Ca_Desig_denovo              | 14493797                       | (C/T)       |
| 41242       | CadSNP16837    | <i>Desi</i>      | Ca_Desig_denovo              | 14495465                       | (A/C)       |
| 41243       | CadSNP16838    | <i>Desi</i>      | Ca_Desig_denovo              | 14495516                       | (T/C)       |
| 41244       | CadSNP16839    | <i>Desi</i>      | Ca_Desig_denovo              | 14496551                       | (A/G)       |
| 41245       | CadSNP16840    | <i>Desi</i>      | Ca_Desig_denovo              | 14498115                       | (C/G)       |
| 41246       | CadSNP16841    | <i>Desi</i>      | Ca_Desig_denovo              | 14505219                       | (G/A)       |
| 41247       | CadSNP16842    | <i>Desi</i>      | Ca_Desig_denovo              | 14505221                       | (T/A)       |
| 41248       | CadSNP16843    | <i>Desi</i>      | Ca_Desig_denovo              | 14512763                       | (A/C)       |
| 41249       | CadSNP16844    | <i>Desi</i>      | Ca_Desig_denovo              | 14517699                       | (A/G)       |
| 41250       | CadSNP16845    | <i>Desi</i>      | Ca_Desig_denovo              | 14524877                       | (A/G)       |
| 41251       | CadSNP16846    | <i>Desi</i>      | Ca_Desig_denovo              | 14524920                       | (A/C)       |
| 41252       | CadSNP16847    | <i>Desi</i>      | Ca_Desig_denovo              | 14530004                       | (A/G)       |
| 41253       | CadSNP16848    | <i>Desi</i>      | Ca_Desig_denovo              | 14530050                       | (G/T)       |
| 41254       | CadSNP16849    | <i>Desi</i>      | Ca_Desig_denovo              | 14530574                       | (T/C)       |
| 41255       | CadSNP16850    | <i>Desi</i>      | Ca_Desig_denovo              | 14531645                       | (A/T)       |
| 41256       | CadSNP16851    | <i>Desi</i>      | Ca_Desig_denovo              | 14535445                       | (T/C)       |
| 41257       | CadSNP16852    | <i>Desi</i>      | Ca_Desig_denovo              | 14535786                       | (A/G)       |
| 41258       | CadSNP16853    | <i>Desi</i>      | Ca_Desig_denovo              | 14536465                       | (G/T)       |
| 41259       | CadSNP16854    | <i>Desi</i>      | Ca_Desig_denovo              | 14536483                       | (G/A)       |
| 41260       | CadSNP16855    | <i>Desi</i>      | Ca_Desig_denovo              | 14547634                       | (C/G)       |
| 41261       | CadSNP16856    | <i>Desi</i>      | Ca_Desig_denovo              | 14552033                       | (C/G)       |
| 41262       | CadSNP16857    | <i>Desi</i>      | Ca_Desig_denovo              | 14552852                       | (T/C)       |
| 41263       | CadSNP16858    | <i>Desi</i>      | Ca_Desig_denovo              | 14563183                       | (C/G)       |
| 41264       | CadSNP16859    | <i>Desi</i>      | Ca_Desig_denovo              | 14563196                       | (T/C)       |
| 41265       | CadSNP16860    | <i>Desi</i>      | Ca_Desig_denovo              | 14565326                       | (C/T)       |
| 41266       | CadSNP16861    | <i>Desi</i>      | Ca_Desig_denovo              | 14576252                       | (C/T)       |
| 41267       | CadSNP16862    | <i>Desi</i>      | Ca_Desig_denovo              | 14579757                       | (G/A)       |



| <b>S.N.</b> | <b>SNP IDs</b> | <b>Cultivars</b> | <b>Chromosomes/scaffolds</b> | <b>Physical positions (bp)</b> | <b>SNPs</b> |
|-------------|----------------|------------------|------------------------------|--------------------------------|-------------|
| 41268       | CadSNP16863    | <i>Desi</i>      | Ca_Desig_denovo              | 14583868                       | (T/G)       |
| 41269       | CadSNP16864    | <i>Desi</i>      | Ca_Desig_denovo              | 14584858                       | (T/G)       |
| 41270       | CadSNP16865    | <i>Desi</i>      | Ca_Desig_denovo              | 14586993                       | (C/T)       |
| 41271       | CadSNP16866    | <i>Desi</i>      | Ca_Desig_denovo              | 14587035                       | (T/C)       |
| 41272       | CadSNP16867    | <i>Desi</i>      | Ca_Desig_denovo              | 14588554                       | (C/G)       |
| 41273       | CadSNP16868    | <i>Desi</i>      | Ca_Desig_denovo              | 14588587                       | (A/G)       |
| 41274       | CadSNP16869    | <i>Desi</i>      | Ca_Desig_denovo              | 14588844                       | (C/A)       |
| 41275       | CadSNP16870    | <i>Desi</i>      | Ca_Desig_denovo              | 14588847                       | (T/C)       |
| 41276       | CadSNP16871    | <i>Desi</i>      | Ca_Desig_denovo              | 14595995                       | (A/C)       |
| 41277       | CadSNP16872    | <i>Desi</i>      | Ca_Desig_denovo              | 14597959                       | (G/A)       |
| 41278       | CadSNP16873    | <i>Desi</i>      | Ca_Desig_denovo              | 14610604                       | (T/C)       |
| 41279       | CadSNP16874    | <i>Desi</i>      | Ca_Desig_denovo              | 14614197                       | (C/T)       |
| 41280       | CadSNP16875    | <i>Desi</i>      | Ca_Desig_denovo              | 14617635                       | (T/G)       |
| 41281       | CadSNP16876    | <i>Desi</i>      | Ca_Desig_denovo              | 14617946                       | (T/C)       |
| 41282       | CadSNP16877    | <i>Desi</i>      | Ca_Desig_denovo              | 14622746                       | (T/C)       |
| 41283       | CadSNP16878    | <i>Desi</i>      | Ca_Desig_denovo              | 14622757                       | (C/T)       |
| 41284       | CadSNP16879    | <i>Desi</i>      | Ca_Desig_denovo              | 14624087                       | (T/G)       |
| 41285       | CadSNP16880    | <i>Desi</i>      | Ca_Desig_denovo              | 14624105                       | (A/G)       |
| 41286       | CadSNP16881    | <i>Desi</i>      | Ca_Desig_denovo              | 14624817                       | (T/C)       |
| 41287       | CadSNP16882    | <i>Desi</i>      | Ca_Desig_denovo              | 14624863                       | (C/G)       |
| 41288       | CadSNP16883    | <i>Desi</i>      | Ca_Desig_denovo              | 14625832                       | (A/C)       |
| 41289       | CadSNP16884    | <i>Desi</i>      | Ca_Desig_denovo              | 14628743                       | (T/G)       |
| 41290       | CadSNP16885    | <i>Desi</i>      | Ca_Desig_denovo              | 14629651                       | (G/C)       |
| 41291       | CadSNP16886    | <i>Desi</i>      | Ca_Desig_denovo              | 14629685                       | (C/G)       |
| 41292       | CadSNP16887    | <i>Desi</i>      | Ca_Desig_denovo              | 14629691                       | (T/C)       |
| 41293       | CadSNP16888    | <i>Desi</i>      | Ca_Desig_denovo              | 14629755                       | (A/T)       |
| 41294       | CadSNP16889    | <i>Desi</i>      | Ca_Desig_denovo              | 14629764                       | (G/A)       |
| 41295       | CadSNP16890    | <i>Desi</i>      | Ca_Desig_denovo              | 14632504                       | (T/C)       |
| 41296       | CadSNP16891    | <i>Desi</i>      | Ca_Desig_denovo              | 14637484                       | (C/T)       |
| 41297       | CadSNP16892    | <i>Desi</i>      | Ca_Desig_denovo              | 14646850                       | (T/G)       |
| 41298       | CadSNP16893    | <i>Desi</i>      | Ca_Desig_denovo              | 14648825                       | (T/C)       |
| 41299       | CadSNP16894    | <i>Desi</i>      | Ca_Desig_denovo              | 14648896                       | (C/G)       |
| 41300       | CadSNP16895    | <i>Desi</i>      | Ca_Desig_denovo              | 14649189                       | (A/G)       |
| 41301       | CadSNP16896    | <i>Desi</i>      | Ca_Desig_denovo              | 14663152                       | (C/T)       |
| 41302       | CadSNP16897    | <i>Desi</i>      | Ca_Desig_denovo              | 14674857                       | (A/G)       |
| 41303       | CadSNP16898    | <i>Desi</i>      | Ca_Desig_denovo              | 14674863                       | (T/G)       |
| 41304       | CadSNP16899    | <i>Desi</i>      | Ca_Desig_denovo              | 14692652                       | (G/T)       |
| 41305       | CadSNP16900    | <i>Desi</i>      | Ca_Desig_denovo              | 14693429                       | (T/A)       |

| <b>S.N.</b> | <b>SNP IDs</b> | <b>Cultivars</b> | <b>Chromosomes/scaffolds</b> | <b>Physical positions (bp)</b> | <b>SNPs</b> |
|-------------|----------------|------------------|------------------------------|--------------------------------|-------------|
| 41306       | CadSNP16901    | <i>Desi</i>      | Ca_Desig_denovo              | 14693440                       | (T/C)       |
| 41307       | CadSNP16902    | <i>Desi</i>      | Ca_Desig_denovo              | 14694391                       | (G/C)       |
| 41308       | CadSNP16903    | <i>Desi</i>      | Ca_Desig_denovo              | 14708229                       | (A/C)       |
| 41309       | CadSNP16904    | <i>Desi</i>      | Ca_Desig_denovo              | 14715414                       | (T/C)       |
| 41310       | CadSNP16905    | <i>Desi</i>      | Ca_Desig_denovo              | 14721669                       | (C/T)       |
| 41311       | CadSNP16906    | <i>Desi</i>      | Ca_Desig_denovo              | 14724516                       | (A/G)       |
| 41312       | CadSNP16907    | <i>Desi</i>      | Ca_Desig_denovo              | 14725410                       | (C/T)       |
| 41313       | CadSNP16908    | <i>Desi</i>      | Ca_Desig_denovo              | 14728840                       | (G/T)       |
| 41314       | CadSNP16909    | <i>Desi</i>      | Ca_Desig_denovo              | 14738534                       | (A/G)       |
| 41315       | CadSNP16910    | <i>Desi</i>      | Ca_Desig_denovo              | 14739601                       | (C/T)       |
| 41316       | CadSNP16911    | <i>Desi</i>      | Ca_Desig_denovo              | 14743958                       | (A/G)       |
| 41317       | CadSNP16912    | <i>Desi</i>      | Ca_Desig_denovo              | 14747512                       | (C/G)       |
| 41318       | CadSNP16913    | <i>Desi</i>      | Ca_Desig_denovo              | 14747735                       | (G/T)       |
| 41319       | CadSNP16914    | <i>Desi</i>      | Ca_Desig_denovo              | 14749024                       | (T/A)       |
| 41320       | CadSNP16915    | <i>Desi</i>      | Ca_Desig_denovo              | 14749816                       | (T/C)       |
| 41321       | CadSNP16916    | <i>Desi</i>      | Ca_Desig_denovo              | 14750862                       | (C/T)       |
| 41322       | CadSNP16917    | <i>Desi</i>      | Ca_Desig_denovo              | 14752845                       | (G/A)       |
| 41323       | CadSNP16918    | <i>Desi</i>      | Ca_Desig_denovo              | 14761138                       | (C/T)       |
| 41324       | CadSNP16919    | <i>Desi</i>      | Ca_Desig_denovo              | 14763790                       | (G/C)       |
| 41325       | CadSNP16920    | <i>Desi</i>      | Ca_Desig_denovo              | 14767677                       | (A/G)       |
| 41326       | CadSNP16921    | <i>Desi</i>      | Ca_Desig_denovo              | 14767727                       | (G/A)       |
| 41327       | CadSNP16922    | <i>Desi</i>      | Ca_Desig_denovo              | 14770144                       | (C/G)       |
| 41328       | CadSNP16923    | <i>Desi</i>      | Ca_Desig_denovo              | 14778136                       | (T/C)       |
| 41329       | CadSNP16924    | <i>Desi</i>      | Ca_Desig_denovo              | 14779753                       | (G/C)       |
| 41330       | CadSNP16925    | <i>Desi</i>      | Ca_Desig_denovo              | 14779756                       | (A/G)       |
| 41331       | CadSNP16926    | <i>Desi</i>      | Ca_Desig_denovo              | 14782840                       | (C/T)       |
| 41332       | CadSNP16927    | <i>Desi</i>      | Ca_Desig_denovo              | 14782897                       | (T/G)       |
| 41333       | CadSNP16928    | <i>Desi</i>      | Ca_Desig_denovo              | 14784108                       | (G/A)       |
| 41334       | CadSNP16929    | <i>Desi</i>      | Ca_Desig_denovo              | 14784247                       | (C/A)       |
| 41335       | CadSNP16930    | <i>Desi</i>      | Ca_Desig_denovo              | 14785901                       | (C/T)       |
| 41336       | CadSNP16931    | <i>Desi</i>      | Ca_Desig_denovo              | 14785931                       | (T/C)       |
| 41337       | CadSNP16932    | <i>Desi</i>      | Ca_Desig_denovo              | 14789147                       | (T/C)       |
| 41338       | CadSNP16933    | <i>Desi</i>      | Ca_Desig_denovo              | 14789189                       | (G/A)       |
| 41339       | CadSNP16934    | <i>Desi</i>      | Ca_Desig_denovo              | 14790092                       | (G/C)       |
| 41340       | CadSNP16935    | <i>Desi</i>      | Ca_Desig_denovo              | 14790093                       | (C/T)       |
| 41341       | CadSNP16936    | <i>Desi</i>      | Ca_Desig_denovo              | 14790113                       | (T/C)       |
| 41342       | CadSNP16937    | <i>Desi</i>      | Ca_Desig_denovo              | 14790929                       | (G/A)       |
| 41343       | CadSNP16938    | <i>Desi</i>      | Ca_Desig_denovo              | 14790935                       | (G/T)       |

| <b>S.N.</b> | <b>SNP IDs</b> | <b>Cultivars</b> | <b>Chromosomes/scaffolds</b> | <b>Physical positions (bp)</b> | <b>SNPs</b> |
|-------------|----------------|------------------|------------------------------|--------------------------------|-------------|
| 41344       | CadSNP16939    | <i>Desi</i>      | Ca_Desig_denovo              | 14795635                       | (T/G)       |
| 41345       | CadSNP16940    | <i>Desi</i>      | Ca_Desig_denovo              | 14799963                       | (A/C)       |
| 41346       | CadSNP16941    | <i>Desi</i>      | Ca_Desig_denovo              | 14800009                       | (A/C)       |
| 41347       | CadSNP16942    | <i>Desi</i>      | Ca_Desig_denovo              | 14810913                       | (A/T)       |
| 41348       | CadSNP16943    | <i>Desi</i>      | Ca_Desig_denovo              | 14814607                       | (G/A)       |
| 41349       | CadSNP16944    | <i>Desi</i>      | Ca_Desig_denovo              | 14819017                       | (A/G)       |
| 41350       | CadSNP16945    | <i>Desi</i>      | Ca_Desig_denovo              | 14823234                       | (T/G)       |
| 41351       | CadSNP16946    | <i>Desi</i>      | Ca_Desig_denovo              | 14824981                       | (A/G)       |
| 41352       | CadSNP16947    | <i>Desi</i>      | Ca_Desig_denovo              | 14832362                       | (A/G)       |
| 41353       | CadSNP16948    | <i>Desi</i>      | Ca_Desig_denovo              | 14834572                       | (A/C)       |
| 41354       | CadSNP16949    | <i>Desi</i>      | Ca_Desig_denovo              | 14835298                       | (G/A)       |
| 41355       | CadSNP16950    | <i>Desi</i>      | Ca_Desig_denovo              | 14835325                       | (C/G)       |
| 41356       | CadSNP16951    | <i>Desi</i>      | Ca_Desig_denovo              | 14836448                       | (A/C)       |
| 41357       | CadSNP16952    | <i>Desi</i>      | Ca_Desig_denovo              | 14838426                       | (A/C)       |
| 41358       | CadSNP16953    | <i>Desi</i>      | Ca_Desig_denovo              | 14838428                       | (A/C)       |
| 41359       | CadSNP16954    | <i>Desi</i>      | Ca_Desig_denovo              | 14838471                       | (G/A)       |
| 41360       | CadSNP16955    | <i>Desi</i>      | Ca_Desig_denovo              | 14838476                       | (C/T)       |
| 41361       | CadSNP16956    | <i>Desi</i>      | Ca_Desig_denovo              | 14840398                       | (G/A)       |
| 41362       | CadSNP16957    | <i>Desi</i>      | Ca_Desig_denovo              | 14840459                       | (G/A)       |
| 41363       | CadSNP16958    | <i>Desi</i>      | Ca_Desig_denovo              | 14840774                       | (A/G)       |
| 41364       | CadSNP16959    | <i>Desi</i>      | Ca_Desig_denovo              | 14847515                       | (C/T)       |
| 41365       | CadSNP16960    | <i>Desi</i>      | Ca_Desig_denovo              | 14847527                       | (C/T)       |
| 41366       | CadSNP16961    | <i>Desi</i>      | Ca_Desig_denovo              | 14847745                       | (C/A)       |
| 41367       | CadSNP16962    | <i>Desi</i>      | Ca_Desig_denovo              | 14848217                       | (G/A)       |
| 41368       | CadSNP16963    | <i>Desi</i>      | Ca_Desig_denovo              | 14848244                       | (T/C)       |
| 41369       | CadSNP16964    | <i>Desi</i>      | Ca_Desig_denovo              | 14850859                       | (T/G)       |
| 41370       | CadSNP16965    | <i>Desi</i>      | Ca_Desig_denovo              | 14850883                       | (C/T)       |
| 41371       | CadSNP16966    | <i>Desi</i>      | Ca_Desig_denovo              | 14851276                       | (G/A)       |
| 41372       | CadSNP16967    | <i>Desi</i>      | Ca_Desig_denovo              | 14851354                       | (A/C)       |
| 41373       | CadSNP16968    | <i>Desi</i>      | Ca_Desig_denovo              | 14863961                       | (T/A)       |
| 41374       | CadSNP16969    | <i>Desi</i>      | Ca_Desig_denovo              | 14868532                       | (C/T)       |
| 41375       | CadSNP16970    | <i>Desi</i>      | Ca_Desig_denovo              | 14879082                       | (A/G)       |
| 41376       | CadSNP16971    | <i>Desi</i>      | Ca_Desig_denovo              | 14879955                       | (C/T)       |
| 41377       | CadSNP16972    | <i>Desi</i>      | Ca_Desig_denovo              | 14881333                       | (C/T)       |
| 41378       | CadSNP16973    | <i>Desi</i>      | Ca_Desig_denovo              | 14884674                       | (T/C)       |
| 41379       | CadSNP16974    | <i>Desi</i>      | Ca_Desig_denovo              | 14884683                       | (C/T)       |
| 41380       | CadSNP16975    | <i>Desi</i>      | Ca_Desig_denovo              | 14885511                       | (C/A)       |
| 41381       | CadSNP16976    | <i>Desi</i>      | Ca_Desig_denovo              | 14895949                       | (G/A)       |

| <b>S.N.</b> | <b>SNP IDs</b> | <b>Cultivars</b> | <b>Chromosomes/scaffolds</b> | <b>Physical positions (bp)</b> | <b>SNPs</b> |
|-------------|----------------|------------------|------------------------------|--------------------------------|-------------|
| 41382       | CadSNP16977    | <i>Desi</i>      | Ca_Desig_denovo              | 14913016                       | (C/A)       |
| 41383       | CadSNP16978    | <i>Desi</i>      | Ca_Desig_denovo              | 14915735                       | (C/T)       |
| 41384       | CadSNP16979    | <i>Desi</i>      | Ca_Desig_denovo              | 14916048                       | (T/C)       |
| 41385       | CadSNP16980    | <i>Desi</i>      | Ca_Desig_denovo              | 14917118                       | (A/G)       |
| 41386       | CadSNP16981    | <i>Desi</i>      | Ca_Desig_denovo              | 14920583                       | (G/A)       |
| 41387       | CadSNP16982    | <i>Desi</i>      | Ca_Desig_denovo              | 14923346                       | (C/G)       |
| 41388       | CadSNP16983    | <i>Desi</i>      | Ca_Desig_denovo              | 14937206                       | (G/A)       |
| 41389       | CadSNP16984    | <i>Desi</i>      | Ca_Desig_denovo              | 14940274                       | (G/A)       |
| 41390       | CadSNP16985    | <i>Desi</i>      | Ca_Desig_denovo              | 14943074                       | (G/A)       |
| 41391       | CadSNP16986    | <i>Desi</i>      | Ca_Desig_denovo              | 14943154                       | (A/G)       |
| 41392       | CadSNP16987    | <i>Desi</i>      | Ca_Desig_denovo              | 14944025                       | (T/C)       |
| 41393       | CadSNP16988    | <i>Desi</i>      | Ca_Desig_denovo              | 14944183                       | (C/G)       |
| 41394       | CadSNP16989    | <i>Desi</i>      | Ca_Desig_denovo              | 14953508                       | (C/G)       |
| 41395       | CadSNP16990    | <i>Desi</i>      | Ca_Desig_denovo              | 14957887                       | (C/T)       |
| 41396       | CadSNP16991    | <i>Desi</i>      | Ca_Desig_denovo              | 14958611                       | (A/G)       |
| 41397       | CadSNP16992    | <i>Desi</i>      | Ca_Desig_denovo              | 14960046                       | (C/T)       |
| 41398       | CadSNP16993    | <i>Desi</i>      | Ca_Desig_denovo              | 14964397                       | (C/T)       |
| 41399       | CadSNP16994    | <i>Desi</i>      | Ca_Desig_denovo              | 14965570                       | (G/A)       |
| 41400       | CadSNP16995    | <i>Desi</i>      | Ca_Desig_denovo              | 14968517                       | (G/A)       |
| 41401       | CadSNP16996    | <i>Desi</i>      | Ca_Desig_denovo              | 14969480                       | (T/G)       |
| 41402       | CadSNP16997    | <i>Desi</i>      | Ca_Desig_denovo              | 14970228                       | (C/T)       |
| 41403       | CadSNP16998    | <i>Desi</i>      | Ca_Desig_denovo              | 14970839                       | (G/A)       |
| 41404       | CadSNP16999    | <i>Desi</i>      | Ca_Desig_denovo              | 14975521                       | (G/A)       |
| 41405       | CadSNP17000    | <i>Desi</i>      | Ca_Desig_denovo              | 14978903                       | (A/G)       |
| 41406       | CadSNP17001    | <i>Desi</i>      | Ca_Desig_denovo              | 14981603                       | (C/A)       |
| 41407       | CadSNP17002    | <i>Desi</i>      | Ca_Desig_denovo              | 14981631                       | (A/T)       |
| 41408       | CadSNP17003    | <i>Desi</i>      | Ca_Desig_denovo              | 14989309                       | (C/T)       |
| 41409       | CadSNP17004    | <i>Desi</i>      | Ca_Desig_denovo              | 14990035                       | (A/G)       |
| 41410       | CadSNP17005    | <i>Desi</i>      | Ca_Desig_denovo              | 14990101                       | (C/G)       |
| 41411       | CadSNP17006    | <i>Desi</i>      | Ca_Desig_denovo              | 14992098                       | (T/G)       |
| 41412       | CadSNP17007    | <i>Desi</i>      | Ca_Desig_denovo              | 14992129                       | (T/C)       |
| 41413       | CadSNP17008    | <i>Desi</i>      | Ca_Desig_denovo              | 14993755                       | (C/T)       |
| 41414       | CadSNP17009    | <i>Desi</i>      | Ca_Desig_denovo              | 14993792                       | (C/T)       |
| 41415       | CadSNP17010    | <i>Desi</i>      | Ca_Desig_denovo              | 15000265                       | (G/A)       |
| 41416       | CadSNP17011    | <i>Desi</i>      | Ca_Desig_denovo              | 15006842                       | (C/T)       |
| 41417       | CadSNP17012    | <i>Desi</i>      | Ca_Desig_denovo              | 15007485                       | (A/G)       |
| 41418       | CadSNP17013    | <i>Desi</i>      | Ca_Desig_denovo              | 15007490                       | (T/C)       |
| 41419       | CadSNP17014    | <i>Desi</i>      | Ca_Desig_denovo              | 15029750                       | (A/G)       |

| <b>S.N.</b> | <b>SNP IDs</b> | <b>Cultivars</b> | <b>Chromosomes/scaffolds</b> | <b>Physical positions (bp)</b> | <b>SNPs</b> |
|-------------|----------------|------------------|------------------------------|--------------------------------|-------------|
| 41420       | CadSNP17015    | <i>Desi</i>      | Ca_Desig_denovo              | 15029777                       | (G/A)       |
| 41421       | CadSNP17016    | <i>Desi</i>      | Ca_Desig_denovo              | 15030604                       | (A/G)       |
| 41422       | CadSNP17017    | <i>Desi</i>      | Ca_Desig_denovo              | 15039672                       | (T/A)       |
| 41423       | CadSNP17018    | <i>Desi</i>      | Ca_Desig_denovo              | 15044560                       | (C/A)       |
| 41424       | CadSNP17019    | <i>Desi</i>      | Ca_Desig_denovo              | 15044589                       | (T/C)       |
| 41425       | CadSNP17020    | <i>Desi</i>      | Ca_Desig_denovo              | 15058752                       | (C/T)       |
| 41426       | CadSNP17021    | <i>Desi</i>      | Ca_Desig_denovo              | 15058753                       | (C/T)       |
| 41427       | CadSNP17022    | <i>Desi</i>      | Ca_Desig_denovo              | 15063099                       | (G/A)       |
| 41428       | CadSNP17023    | <i>Desi</i>      | Ca_Desig_denovo              | 15063100                       | (C/T)       |
| 41429       | CadSNP17024    | <i>Desi</i>      | Ca_Desig_denovo              | 15065308                       | (C/T)       |
| 41430       | CadSNP17025    | <i>Desi</i>      | Ca_Desig_denovo              | 15070942                       | (C/T)       |
| 41431       | CadSNP17026    | <i>Desi</i>      | Ca_Desig_denovo              | 15078963                       | (T/C)       |
| 41432       | CadSNP17027    | <i>Desi</i>      | Ca_Desig_denovo              | 15078982                       | (A/G)       |
| 41433       | CadSNP17028    | <i>Desi</i>      | Ca_Desig_denovo              | 15080539                       | (T/G)       |
| 41434       | CadSNP17029    | <i>Desi</i>      | Ca_Desig_denovo              | 15080559                       | (A/G)       |
| 41435       | CadSNP17030    | <i>Desi</i>      | Ca_Desig_denovo              | 15081225                       | (C/T)       |
| 41436       | CadSNP17031    | <i>Desi</i>      | Ca_Desig_denovo              | 15090840                       | (A/C)       |
| 41437       | CadSNP17032    | <i>Desi</i>      | Ca_Desig_denovo              | 15090889                       | (A/G)       |
| 41438       | CadSNP17033    | <i>Desi</i>      | Ca_Desig_denovo              | 15098012                       | (G/A)       |
| 41439       | CadSNP17034    | <i>Desi</i>      | Ca_Desig_denovo              | 15101326                       | (T/C)       |
| 41440       | CadSNP17035    | <i>Desi</i>      | Ca_Desig_denovo              | 15101613                       | (T/G)       |
| 41441       | CadSNP17036    | <i>Desi</i>      | Ca_Desig_denovo              | 15103939                       | (A/G)       |
| 41442       | CadSNP17037    | <i>Desi</i>      | Ca_Desig_denovo              | 15103962                       | (T/C)       |
| 41443       | CadSNP17038    | <i>Desi</i>      | Ca_Desig_denovo              | 15103992                       | (G/A)       |
| 41444       | CadSNP17039    | <i>Desi</i>      | Ca_Desig_denovo              | 15118104                       | (C/T)       |
| 41445       | CadSNP17040    | <i>Desi</i>      | Ca_Desig_denovo              | 15126740                       | (C/A)       |
| 41446       | CadSNP17041    | <i>Desi</i>      | Ca_Desig_denovo              | 15126779                       | (A/G)       |
| 41447       | CadSNP17042    | <i>Desi</i>      | Ca_Desig_denovo              | 15132199                       | (C/G)       |
| 41448       | CadSNP17043    | <i>Desi</i>      | Ca_Desig_denovo              | 15132217                       | (C/T)       |
| 41449       | CadSNP17044    | <i>Desi</i>      | Ca_Desig_denovo              | 15136420                       | (C/G)       |
| 41450       | CadSNP17045    | <i>Desi</i>      | Ca_Desig_denovo              | 15137837                       | (C/G)       |
| 41451       | CadSNP17046    | <i>Desi</i>      | Ca_Desig_denovo              | 15145380                       | (C/T)       |
| 41452       | CadSNP17047    | <i>Desi</i>      | Ca_Desig_denovo              | 15154046                       | (T/C)       |
| 41453       | CadSNP17048    | <i>Desi</i>      | Ca_Desig_denovo              | 15154061                       | (A/G)       |
| 41454       | CadSNP17049    | <i>Desi</i>      | Ca_Desig_denovo              | 15156252                       | (A/C)       |
| 41455       | CadSNP17050    | <i>Desi</i>      | Ca_Desig_denovo              | 15156288                       | (A/C)       |
| 41456       | CadSNP17051    | <i>Desi</i>      | Ca_Desig_denovo              | 15166775                       | (C/T)       |
| 41457       | CadSNP17052    | <i>Desi</i>      | Ca_Desig_denovo              | 15167494                       | (A/G)       |

| <b>S.N.</b> | <b>SNP IDs</b> | <b>Cultivars</b> | <b>Chromosomes/scaffolds</b> | <b>Physical positions (bp)</b> | <b>SNPs</b> |
|-------------|----------------|------------------|------------------------------|--------------------------------|-------------|
| 41458       | CadSNP17053    | <i>Desi</i>      | Ca_Desig_denovo              | 15171676                       | (T/C)       |
| 41459       | CadSNP17054    | <i>Desi</i>      | Ca_Desig_denovo              | 15171682                       | (T/G)       |
| 41460       | CadSNP17055    | <i>Desi</i>      | Ca_Desig_denovo              | 15178757                       | (T/C)       |
| 41461       | CadSNP17056    | <i>Desi</i>      | Ca_Desig_denovo              | 15178771                       | (C/G)       |
| 41462       | CadSNP17057    | <i>Desi</i>      | Ca_Desig_denovo              | 15180963                       | (G/C)       |
| 41463       | CadSNP17058    | <i>Desi</i>      | Ca_Desig_denovo              | 15181009                       | (C/T)       |
| 41464       | CadSNP17059    | <i>Desi</i>      | Ca_Desig_denovo              | 15187441                       | (T/G)       |
| 41465       | CadSNP17060    | <i>Desi</i>      | Ca_Desig_denovo              | 15188422                       | (A/G)       |
| 41466       | CadSNP17061    | <i>Desi</i>      | Ca_Desig_denovo              | 15188432                       | (A/C)       |
| 41467       | CadSNP17062    | <i>Desi</i>      | Ca_Desig_denovo              | 15194105                       | (G/A)       |
| 41468       | CadSNP17063    | <i>Desi</i>      | Ca_Desig_denovo              | 15202976                       | (G/T)       |
| 41469       | CadSNP17064    | <i>Desi</i>      | Ca_Desig_denovo              | 15203329                       | (C/A)       |
| 41470       | CadSNP17065    | <i>Desi</i>      | Ca_Desig_denovo              | 15208807                       | (A/G)       |
| 41471       | CadSNP17066    | <i>Desi</i>      | Ca_Desig_denovo              | 15208846                       | (C/T)       |
| 41472       | CadSNP17067    | <i>Desi</i>      | Ca_Desig_denovo              | 15213140                       | (A/C)       |
| 41473       | CadSNP17068    | <i>Desi</i>      | Ca_Desig_denovo              | 15213191                       | (C/T)       |
| 41474       | CadSNP17069    | <i>Desi</i>      | Ca_Desig_denovo              | 15217415                       | (C/T)       |
| 41475       | CadSNP17070    | <i>Desi</i>      | Ca_Desig_denovo              | 15220774                       | (C/T)       |
| 41476       | CadSNP17071    | <i>Desi</i>      | Ca_Desig_denovo              | 15220775                       | (G/A)       |
| 41477       | CadSNP17072    | <i>Desi</i>      | Ca_Desig_denovo              | 15222002                       | (C/A)       |
| 41478       | CadSNP17073    | <i>Desi</i>      | Ca_Desig_denovo              | 15222012                       | (T/G)       |
| 41479       | CadSNP17074    | <i>Desi</i>      | Ca_Desig_denovo              | 15222724                       | (G/C)       |
| 41480       | CadSNP17075    | <i>Desi</i>      | Ca_Desig_denovo              | 15228375                       | (A/G)       |
| 41481       | CadSNP17076    | <i>Desi</i>      | Ca_Desig_denovo              | 15229783                       | (G/C)       |
| 41482       | CadSNP17077    | <i>Desi</i>      | Ca_Desig_denovo              | 15231017                       | (C/G)       |
| 41483       | CadSNP17078    | <i>Desi</i>      | Ca_Desig_denovo              | 15233037                       | (A/G)       |
| 41484       | CadSNP17079    | <i>Desi</i>      | Ca_Desig_denovo              | 15233087                       | (A/T)       |
| 41485       | CadSNP17080    | <i>Desi</i>      | Ca_Desig_denovo              | 15242659                       | (C/A)       |
| 41486       | CadSNP17081    | <i>Desi</i>      | Ca_Desig_denovo              | 15243203                       | (A/G)       |
| 41487       | CadSNP17082    | <i>Desi</i>      | Ca_Desig_denovo              | 15243221                       | (T/C)       |
| 41488       | CadSNP17083    | <i>Desi</i>      | Ca_Desig_denovo              | 15245878                       | (C/T)       |
| 41489       | CadSNP17084    | <i>Desi</i>      | Ca_Desig_denovo              | 15253502                       | (A/G)       |
| 41490       | CadSNP17085    | <i>Desi</i>      | Ca_Desig_denovo              | 15276924                       | (A/T)       |
| 41491       | CadSNP17086    | <i>Desi</i>      | Ca_Desig_denovo              | 15277169                       | (G/T)       |
| 41492       | CadSNP17087    | <i>Desi</i>      | Ca_Desig_denovo              | 15282886                       | (C/T)       |
| 41493       | CadSNP17088    | <i>Desi</i>      | Ca_Desig_denovo              | 15282943                       | (A/C)       |
| 41494       | CadSNP17089    | <i>Desi</i>      | Ca_Desig_denovo              | 15283906                       | (A/G)       |
| 41495       | CadSNP17090    | <i>Desi</i>      | Ca_Desig_denovo              | 15289214                       | (A/G)       |

| <b>S.N.</b> | <b>SNP IDs</b> | <b>Cultivars</b> | <b>Chromosomes/scaffolds</b> | <b>Physical positions (bp)</b> | <b>SNPs</b> |
|-------------|----------------|------------------|------------------------------|--------------------------------|-------------|
| 41496       | CadSNP17091    | <i>Desi</i>      | Ca_Desig_denovo              | 15289251                       | (A/G)       |
| 41497       | CadSNP17092    | <i>Desi</i>      | Ca_Desig_denovo              | 15290170                       | (C/T)       |
| 41498       | CadSNP17093    | <i>Desi</i>      | Ca_Desig_denovo              | 15291921                       | (G/A)       |
| 41499       | CadSNP17094    | <i>Desi</i>      | Ca_Desig_denovo              | 15291952                       | (G/C)       |
| 41500       | CadSNP17095    | <i>Desi</i>      | Ca_Desig_denovo              | 15297934                       | (G/T)       |
| 41501       | CadSNP17096    | <i>Desi</i>      | Ca_Desig_denovo              | 15297936                       | (A/G)       |
| 41502       | CadSNP17097    | <i>Desi</i>      | Ca_Desig_denovo              | 15303851                       | (C/T)       |
| 41503       | CadSNP17098    | <i>Desi</i>      | Ca_Desig_denovo              | 15304848                       | (C/T)       |
| 41504       | CadSNP17099    | <i>Desi</i>      | Ca_Desig_denovo              | 15304853                       | (C/A)       |
| 41505       | CadSNP17100    | <i>Desi</i>      | Ca_Desig_denovo              | 15307109                       | (G/A)       |
| 41506       | CadSNP17101    | <i>Desi</i>      | Ca_Desig_denovo              | 15310372                       | (C/T)       |
| 41507       | CadSNP17102    | <i>Desi</i>      | Ca_Desig_denovo              | 15310396                       | (G/A)       |
| 41508       | CadSNP17103    | <i>Desi</i>      | Ca_Desig_denovo              | 15317016                       | (G/A)       |
| 41509       | CadSNP17104    | <i>Desi</i>      | Ca_Desig_denovo              | 15317036                       | (G/C)       |
| 41510       | CadSNP17105    | <i>Desi</i>      | Ca_Desig_denovo              | 15324222                       | (A/G)       |
| 41511       | CadSNP17106    | <i>Desi</i>      | Ca_Desig_denovo              | 15324227                       | (G/A)       |
| 41512       | CadSNP17107    | <i>Desi</i>      | Ca_Desig_denovo              | 15324239                       | (C/G)       |
| 41513       | CadSNP17108    | <i>Desi</i>      | Ca_Desig_denovo              | 15331183                       | (T/C)       |
| 41514       | CadSNP17109    | <i>Desi</i>      | Ca_Desig_denovo              | 15331363                       | (A/G)       |
| 41515       | CadSNP17110    | <i>Desi</i>      | Ca_Desig_denovo              | 15331364                       | (T/C)       |
| 41516       | CadSNP17111    | <i>Desi</i>      | Ca_Desig_denovo              | 15332408                       | (C/G)       |
| 41517       | CadSNP17112    | <i>Desi</i>      | Ca_Desig_denovo              | 15332414                       | (C/G)       |
| 41518       | CadSNP17113    | <i>Desi</i>      | Ca_Desig_denovo              | 15332850                       | (T/G)       |
| 41519       | CadSNP17114    | <i>Desi</i>      | Ca_Desig_denovo              | 15332856                       | (T/A)       |
| 41520       | CadSNP17115    | <i>Desi</i>      | Ca_Desig_denovo              | 15335693                       | (T/G)       |
| 41521       | CadSNP17116    | <i>Desi</i>      | Ca_Desig_denovo              | 15339613                       | (C/T)       |
| 41522       | CadSNP17117    | <i>Desi</i>      | Ca_Desig_denovo              | 15339643                       | (T/C)       |
| 41523       | CadSNP17118    | <i>Desi</i>      | Ca_Desig_denovo              | 15342383                       | (C/T)       |
| 41524       | CadSNP17119    | <i>Desi</i>      | Ca_Desig_denovo              | 15346367                       | (G/C)       |
| 41525       | CadSNP17120    | <i>Desi</i>      | Ca_Desig_denovo              | 15346374                       | (C/G)       |
| 41526       | CadSNP17121    | <i>Desi</i>      | Ca_Desig_denovo              | 15355194                       | (C/T)       |
| 41527       | CadSNP17122    | <i>Desi</i>      | Ca_Desig_denovo              | 15360981                       | (G/A)       |
| 41528       | CadSNP17123    | <i>Desi</i>      | Ca_Desig_denovo              | 15361089                       | (A/C)       |
| 41529       | CadSNP17124    | <i>Desi</i>      | Ca_Desig_denovo              | 15367447                       | (C/G)       |
| 41530       | CadSNP17125    | <i>Desi</i>      | Ca_Desig_denovo              | 15367459                       | (T/C)       |
| 41531       | CadSNP17126    | <i>Desi</i>      | Ca_Desig_denovo              | 15367540                       | (C/T)       |
| 41532       | CadSNP17127    | <i>Desi</i>      | Ca_Desig_denovo              | 15370134                       | (A/C)       |
| 41533       | CadSNP17128    | <i>Desi</i>      | Ca_Desig_denovo              | 15370539                       | (C/G)       |

| <b>S.N.</b> | <b>SNP IDs</b> | <b>Cultivars</b> | <b>Chromosomes/scaffolds</b> | <b>Physical positions (bp)</b> | <b>SNPs</b> |
|-------------|----------------|------------------|------------------------------|--------------------------------|-------------|
| 41534       | CadSNP17129    | <i>Desi</i>      | Ca_Desig_denovo              | 15379548                       | (C/T)       |
| 41535       | CadSNP17130    | <i>Desi</i>      | Ca_Desig_denovo              | 15379578                       | (C/G)       |
| 41536       | CadSNP17131    | <i>Desi</i>      | Ca_Desig_denovo              | 15382865                       | (C/G)       |
| 41537       | CadSNP17132    | <i>Desi</i>      | Ca_Desig_denovo              | 15382889                       | (T/C)       |
| 41538       | CadSNP17133    | <i>Desi</i>      | Ca_Desig_denovo              | 15385555                       | (G/A)       |
| 41539       | CadSNP17134    | <i>Desi</i>      | Ca_Desig_denovo              | 15385568                       | (A/G)       |
| 41540       | CadSNP17135    | <i>Desi</i>      | Ca_Desig_denovo              | 15393655                       | (A/G)       |
| 41541       | CadSNP17136    | <i>Desi</i>      | Ca_Desig_denovo              | 15393682                       | (G/A)       |
| 41542       | CadSNP17137    | <i>Desi</i>      | Ca_Desig_denovo              | 15396281                       | (T/G)       |
| 41543       | CadSNP17138    | <i>Desi</i>      | Ca_Desig_denovo              | 15396284                       | (T/C)       |
| 41544       | CadSNP17139    | <i>Desi</i>      | Ca_Desig_denovo              | 15403038                       | (G/A)       |
| 41545       | CadSNP17140    | <i>Desi</i>      | Ca_Desig_denovo              | 15404094                       | (G/C)       |
| 41546       | CadSNP17141    | <i>Desi</i>      | Ca_Desig_denovo              | 15418477                       | (G/C)       |
| 41547       | CadSNP17142    | <i>Desi</i>      | Ca_Desig_denovo              | 15421201                       | (G/C)       |
| 41548       | CadSNP17143    | <i>Desi</i>      | Ca_Desig_denovo              | 15423704                       | (T/C)       |
| 41549       | CadSNP17144    | <i>Desi</i>      | Ca_Desig_denovo              | 15423832                       | (C/T)       |
| 41550       | CadSNP17145    | <i>Desi</i>      | Ca_Desig_denovo              | 15425662                       | (G/A)       |
| 41551       | CadSNP17146    | <i>Desi</i>      | Ca_Desig_denovo              | 15425718                       | (G/A)       |
| 41552       | CadSNP17147    | <i>Desi</i>      | Ca_Desig_denovo              | 15428446                       | (G/A)       |
| 41553       | CadSNP17148    | <i>Desi</i>      | Ca_Desig_denovo              | 15440893                       | (G/A)       |
| 41554       | CadSNP17149    | <i>Desi</i>      | Ca_Desig_denovo              | 15443155                       | (A/G)       |
| 41555       | CadSNP17150    | <i>Desi</i>      | Ca_Desig_denovo              | 15443167                       | (T/C)       |
| 41556       | CadSNP17151    | <i>Desi</i>      | Ca_Desig_denovo              | 15456056                       | (G/C)       |
| 41557       | CadSNP17152    | <i>Desi</i>      | Ca_Desig_denovo              | 15458109                       | (A/G)       |
| 41558       | CadSNP17153    | <i>Desi</i>      | Ca_Desig_denovo              | 15458139                       | (T/C)       |
| 41559       | CadSNP17154    | <i>Desi</i>      | Ca_Desig_denovo              | 15459081                       | (A/C)       |
| 41560       | CadSNP17155    | <i>Desi</i>      | Ca_Desig_denovo              | 15468364                       | (T/C)       |
| 41561       | CadSNP17156    | <i>Desi</i>      | Ca_Desig_denovo              | 15471079                       | (G/A)       |
| 41562       | CadSNP17157    | <i>Desi</i>      | Ca_Desig_denovo              | 15473183                       | (G/C)       |
| 41563       | CadSNP17158    | <i>Desi</i>      | Ca_Desig_denovo              | 15477751                       | (A/G)       |
| 41564       | CadSNP17159    | <i>Desi</i>      | Ca_Desig_denovo              | 15477802                       | (C/T)       |
| 41565       | CadSNP17160    | <i>Desi</i>      | Ca_Desig_denovo              | 15478278                       | (G/A)       |
| 41566       | CadSNP17161    | <i>Desi</i>      | Ca_Desig_denovo              | 15478882                       | (G/T)       |
| 41567       | CadSNP17162    | <i>Desi</i>      | Ca_Desig_denovo              | 15485641                       | (A/G)       |
| 41568       | CadSNP17163    | <i>Desi</i>      | Ca_Desig_denovo              | 15485710                       | (A/C)       |
| 41569       | CadSNP17164    | <i>Desi</i>      | Ca_Desig_denovo              | 15486854                       | (C/A)       |
| 41570       | CadSNP17165    | <i>Desi</i>      | Ca_Desig_denovo              | 15502385                       | (G/T)       |
| 41571       | CadSNP17166    | <i>Desi</i>      | Ca_Desig_denovo              | 15502979                       | (G/T)       |



| <b>S.N.</b> | <b>SNP IDs</b> | <b>Cultivars</b> | <b>Chromosomes/scaffolds</b> | <b>Physical positions (bp)</b> | <b>SNPs</b> |
|-------------|----------------|------------------|------------------------------|--------------------------------|-------------|
| 41572       | CadSNP17167    | <i>Desi</i>      | Ca_Desig_denovo              | 15502996                       | (A/G)       |
| 41573       | CadSNP17168    | <i>Desi</i>      | Ca_Desig_denovo              | 15505731                       | (A/G)       |
| 41574       | CadSNP17169    | <i>Desi</i>      | Ca_Desig_denovo              | 15505750                       | (A/C)       |
| 41575       | CadSNP17170    | <i>Desi</i>      | Ca_Desig_denovo              | 15511854                       | (G/T)       |
| 41576       | CadSNP17171    | <i>Desi</i>      | Ca_Desig_denovo              | 15512656                       | (A/G)       |
| 41577       | CadSNP17172    | <i>Desi</i>      | Ca_Desig_denovo              | 15512665                       | (A/G)       |
| 41578       | CadSNP17173    | <i>Desi</i>      | Ca_Desig_denovo              | 15514575                       | (G/T)       |
| 41579       | CadSNP17174    | <i>Desi</i>      | Ca_Desig_denovo              | 15514598                       | (A/G)       |
| 41580       | CadSNP17175    | <i>Desi</i>      | Ca_Desig_denovo              | 15524672                       | (C/G)       |
| 41581       | CadSNP17176    | <i>Desi</i>      | Ca_Desig_denovo              | 15527963                       | (G/C)       |
| 41582       | CadSNP17177    | <i>Desi</i>      | Ca_Desig_denovo              | 15532822                       | (C/G)       |
| 41583       | CadSNP17178    | <i>Desi</i>      | Ca_Desig_denovo              | 15532860                       | (G/A)       |
| 41584       | CadSNP17179    | <i>Desi</i>      | Ca_Desig_denovo              | 15535045                       | (G/T)       |
| 41585       | CadSNP17180    | <i>Desi</i>      | Ca_Desig_denovo              | 15542948                       | (C/T)       |
| 41586       | CadSNP17181    | <i>Desi</i>      | Ca_Desig_denovo              | 15542993                       | (A/C)       |
| 41587       | CadSNP17182    | <i>Desi</i>      | Ca_Desig_denovo              | 15544033                       | (G/A)       |
| 41588       | CadSNP17183    | <i>Desi</i>      | Ca_Desig_denovo              | 15544042                       | (C/A)       |
| 41589       | CadSNP17184    | <i>Desi</i>      | Ca_Desig_denovo              | 15544798                       | (A/G)       |
| 41590       | CadSNP17185    | <i>Desi</i>      | Ca_Desig_denovo              | 15544813                       | (C/T)       |
| 41591       | CadSNP17186    | <i>Desi</i>      | Ca_Desig_denovo              | 15546528                       | (T/C)       |
| 41592       | CadSNP17187    | <i>Desi</i>      | Ca_Desig_denovo              | 15548732                       | (T/C)       |
| 41593       | CadSNP17188    | <i>Desi</i>      | Ca_Desig_denovo              | 15550665                       | (T/C)       |
| 41594       | CadSNP17189    | <i>Desi</i>      | Ca_Desig_denovo              | 15550713                       | (A/G)       |
| 41595       | CadSNP17190    | <i>Desi</i>      | Ca_Desig_denovo              | 15550816                       | (G/C)       |
| 41596       | CadSNP17191    | <i>Desi</i>      | Ca_Desig_denovo              | 15550819                       | (A/G)       |
| 41597       | CadSNP17192    | <i>Desi</i>      | Ca_Desig_denovo              | 15561970                       | (G/A)       |
| 41598       | CadSNP17193    | <i>Desi</i>      | Ca_Desig_denovo              | 15564319                       | (A/G)       |
| 41599       | CadSNP17194    | <i>Desi</i>      | Ca_Desig_denovo              | 15564370                       | (C/G)       |
| 41600       | CadSNP17195    | <i>Desi</i>      | Ca_Desig_denovo              | 15569698                       | (C/A)       |
| 41601       | CadSNP17196    | <i>Desi</i>      | Ca_Desig_denovo              | 15569728                       | (T/C)       |
| 41602       | CadSNP17197    | <i>Desi</i>      | Ca_Desig_denovo              | 15573055                       | (T/C)       |
| 41603       | CadSNP17198    | <i>Desi</i>      | Ca_Desig_denovo              | 15575593                       | (G/A)       |
| 41604       | CadSNP17199    | <i>Desi</i>      | Ca_Desig_denovo              | 15575596                       | (C/G)       |
| 41605       | CadSNP17200    | <i>Desi</i>      | Ca_Desig_denovo              | 15584957                       | (G/A)       |
| 41606       | CadSNP17201    | <i>Desi</i>      | Ca_Desig_denovo              | 15588505                       | (A/G)       |
| 41607       | CadSNP17202    | <i>Desi</i>      | Ca_Desig_denovo              | 15590732                       | (C/T)       |
| 41608       | CadSNP17203    | <i>Desi</i>      | Ca_Desig_denovo              | 15590806                       | (C/T)       |
| 41609       | CadSNP17204    | <i>Desi</i>      | Ca_Desig_denovo              | 15590810                       | (G/T)       |

| <b>S.N.</b> | <b>SNP IDs</b> | <b>Cultivars</b> | <b>Chromosomes/scaffolds</b> | <b>Physical positions (bp)</b> | <b>SNPs</b> |
|-------------|----------------|------------------|------------------------------|--------------------------------|-------------|
| 41610       | CadSNP17205    | <i>Desi</i>      | Ca_Desig_denovo              | 15591398                       | (C/A)       |
| 41611       | CadSNP17206    | <i>Desi</i>      | Ca_Desig_denovo              | 15591404                       | (G/C)       |
| 41612       | CadSNP17207    | <i>Desi</i>      | Ca_Desig_denovo              | 15594637                       | (A/G)       |
| 41613       | CadSNP17208    | <i>Desi</i>      | Ca_Desig_denovo              | 15594666                       | (T/C)       |
| 41614       | CadSNP17209    | <i>Desi</i>      | Ca_Desig_denovo              | 15597323                       | (C/T)       |
| 41615       | CadSNP17210    | <i>Desi</i>      | Ca_Desig_denovo              | 15597968                       | (T/G)       |
| 41616       | CadSNP17211    | <i>Desi</i>      | Ca_Desig_denovo              | 15600593                       | (C/T)       |
| 41617       | CadSNP17212    | <i>Desi</i>      | Ca_Desig_denovo              | 15601171                       | (A/G)       |
| 41618       | CadSNP17213    | <i>Desi</i>      | Ca_Desig_denovo              | 15602930                       | (C/G)       |
| 41619       | CadSNP17214    | <i>Desi</i>      | Ca_Desig_denovo              | 15605001                       | (A/G)       |
| 41620       | CadSNP17215    | <i>Desi</i>      | Ca_Desig_denovo              | 15605789                       | (C/A)       |
| 41621       | CadSNP17216    | <i>Desi</i>      | Ca_Desig_denovo              | 15612599                       | (C/T)       |
| 41622       | CadSNP17217    | <i>Desi</i>      | Ca_Desig_denovo              | 15617408                       | (A/G)       |
| 41623       | CadSNP17218    | <i>Desi</i>      | Ca_Desig_denovo              | 15618344                       | (A/T)       |
| 41624       | CadSNP17219    | <i>Desi</i>      | Ca_Desig_denovo              | 15619857                       | (C/T)       |
| 41625       | CadSNP17220    | <i>Desi</i>      | Ca_Desig_denovo              | 15619878                       | (A/G)       |
| 41626       | CadSNP17221    | <i>Desi</i>      | Ca_Desig_denovo              | 15629792                       | (T/C)       |
| 41627       | CadSNP17222    | <i>Desi</i>      | Ca_Desig_denovo              | 15629834                       | (T/C)       |
| 41628       | CadSNP17223    | <i>Desi</i>      | Ca_Desig_denovo              | 15633322                       | (A/G)       |
| 41629       | CadSNP17224    | <i>Desi</i>      | Ca_Desig_denovo              | 15637204                       | (A/G)       |
| 41630       | CadSNP17225    | <i>Desi</i>      | Ca_Desig_denovo              | 15638261                       | (G/A)       |
| 41631       | CadSNP17226    | <i>Desi</i>      | Ca_Desig_denovo              | 15638262                       | (C/G)       |
| 41632       | CadSNP17227    | <i>Desi</i>      | Ca_Desig_denovo              | 15638270                       | (A/G)       |
| 41633       | CadSNP17228    | <i>Desi</i>      | Ca_Desig_denovo              | 15640437                       | (C/G)       |
| 41634       | CadSNP17229    | <i>Desi</i>      | Ca_Desig_denovo              | 15646262                       | (G/A)       |
| 41635       | CadSNP17230    | <i>Desi</i>      | Ca_Desig_denovo              | 15646271                       | (C/G)       |
| 41636       | CadSNP17231    | <i>Desi</i>      | Ca_Desig_denovo              | 15647926                       | (G/A)       |
| 41637       | CadSNP17232    | <i>Desi</i>      | Ca_Desig_denovo              | 15647935                       | (G/T)       |
| 41638       | CadSNP17233    | <i>Desi</i>      | Ca_Desig_denovo              | 15656437                       | (C/A)       |
| 41639       | CadSNP17234    | <i>Desi</i>      | Ca_Desig_denovo              | 15664918                       | (A/C)       |
| 41640       | CadSNP17235    | <i>Desi</i>      | Ca_Desig_denovo              | 15669669                       | (T/C)       |
| 41641       | CadSNP17236    | <i>Desi</i>      | Ca_Desig_denovo              | 15669684                       | (T/C)       |
| 41642       | CadSNP17237    | <i>Desi</i>      | Ca_Desig_denovo              | 15670751                       | (T/C)       |
| 41643       | CadSNP17238    | <i>Desi</i>      | Ca_Desig_denovo              | 15671084                       | (G/A)       |
| 41644       | CadSNP17239    | <i>Desi</i>      | Ca_Desig_denovo              | 15671998                       | (G/C)       |
| 41645       | CadSNP17240    | <i>Desi</i>      | Ca_Desig_denovo              | 15672057                       | (A/T)       |
| 41646       | CadSNP17241    | <i>Desi</i>      | Ca_Desig_denovo              | 15672278                       | (G/A)       |
| 41647       | CadSNP17242    | <i>Desi</i>      | Ca_Desig_denovo              | 15672284                       | (C/G)       |

| <b>S.N.</b> | <b>SNP IDs</b> | <b>Cultivars</b> | <b>Chromosomes/scaffolds</b> | <b>Physical positions (bp)</b> | <b>SNPs</b> |
|-------------|----------------|------------------|------------------------------|--------------------------------|-------------|
| 41648       | CadSNP17243    | <i>Desi</i>      | Ca_Desig_denovo              | 15680096                       | (G/T)       |
| 41649       | CadSNP17244    | <i>Desi</i>      | Ca_Desig_denovo              | 15687371                       | (T/C)       |
| 41650       | CadSNP17245    | <i>Desi</i>      | Ca_Desig_denovo              | 15694876                       | (G/C)       |
| 41651       | CadSNP17246    | <i>Desi</i>      | Ca_Desig_denovo              | 15694900                       | (C/A)       |
| 41652       | CadSNP17247    | <i>Desi</i>      | Ca_Desig_denovo              | 15694918                       | (A/G)       |
| 41653       | CadSNP17248    | <i>Desi</i>      | Ca_Desig_denovo              | 15695207                       | (G/C)       |
| 41654       | CadSNP17249    | <i>Desi</i>      | Ca_Desig_denovo              | 15695227                       | (C/T)       |
| 41655       | CadSNP17250    | <i>Desi</i>      | Ca_Desig_denovo              | 15709185                       | (C/T)       |
| 41656       | CadSNP17251    | <i>Desi</i>      | Ca_Desig_denovo              | 15712294                       | (C/T)       |
| 41657       | CadSNP17252    | <i>Desi</i>      | Ca_Desig_denovo              | 15712314                       | (G/C)       |
| 41658       | CadSNP17253    | <i>Desi</i>      | Ca_Desig_denovo              | 15719161                       | (C/T)       |
| 41659       | CadSNP17254    | <i>Desi</i>      | Ca_Desig_denovo              | 15719210                       | (C/G)       |
| 41660       | CadSNP17255    | <i>Desi</i>      | Ca_Desig_denovo              | 15722163                       | (G/C)       |
| 41661       | CadSNP17256    | <i>Desi</i>      | Ca_Desig_denovo              | 15726069                       | (C/T)       |
| 41662       | CadSNP17257    | <i>Desi</i>      | Ca_Desig_denovo              | 15732706                       | (C/G)       |
| 41663       | CadSNP17258    | <i>Desi</i>      | Ca_Desig_denovo              | 15733080                       | (C/A)       |
| 41664       | CadSNP17259    | <i>Desi</i>      | Ca_Desig_denovo              | 15735064                       | (C/T)       |
| 41665       | CadSNP17260    | <i>Desi</i>      | Ca_Desig_denovo              | 15735691                       | (A/G)       |
| 41666       | CadSNP17261    | <i>Desi</i>      | Ca_Desig_denovo              | 15740172                       | (A/G)       |
| 41667       | CadSNP17262    | <i>Desi</i>      | Ca_Desig_denovo              | 15748444                       | (A/G)       |
| 41668       | CadSNP17263    | <i>Desi</i>      | Ca_Desig_denovo              | 15765542                       | (A/C)       |
| 41669       | CadSNP17264    | <i>Desi</i>      | Ca_Desig_denovo              | 15768530                       | (G/A)       |
| 41670       | CadSNP17265    | <i>Desi</i>      | Ca_Desig_denovo              | 15768565                       | (G/T)       |
| 41671       | CadSNP17266    | <i>Desi</i>      | Ca_Desig_denovo              | 15770761                       | (C/T)       |
| 41672       | CadSNP17267    | <i>Desi</i>      | Ca_Desig_denovo              | 15770768                       | (G/A)       |
| 41673       | CadSNP17268    | <i>Desi</i>      | Ca_Desig_denovo              | 15771289                       | (T/C)       |
| 41674       | CadSNP17269    | <i>Desi</i>      | Ca_Desig_denovo              | 15771313                       | (G/C)       |
| 41675       | CadSNP17270    | <i>Desi</i>      | Ca_Desig_denovo              | 15773318                       | (A/G)       |
| 41676       | CadSNP17271    | <i>Desi</i>      | Ca_Desig_denovo              | 15773348                       | (T/C)       |
| 41677       | CadSNP17272    | <i>Desi</i>      | Ca_Desig_denovo              | 15774634                       | (G/T)       |
| 41678       | CadSNP17273    | <i>Desi</i>      | Ca_Desig_denovo              | 15776755                       | (T/G)       |
| 41679       | CadSNP17274    | <i>Desi</i>      | Ca_Desig_denovo              | 15776761                       | (T/C)       |
| 41680       | CadSNP17275    | <i>Desi</i>      | Ca_Desig_denovo              | 15778667                       | (T/C)       |
| 41681       | CadSNP17276    | <i>Desi</i>      | Ca_Desig_denovo              | 15779426                       | (A/G)       |
| 41682       | CadSNP17277    | <i>Desi</i>      | Ca_Desig_denovo              | 15781982                       | (A/G)       |
| 41683       | CadSNP17278    | <i>Desi</i>      | Ca_Desig_denovo              | 15784533                       | (A/C)       |
| 41684       | CadSNP17279    | <i>Desi</i>      | Ca_Desig_denovo              | 15785194                       | (T/C)       |
| 41685       | CadSNP17280    | <i>Desi</i>      | Ca_Desig_denovo              | 15785217                       | (T/G)       |

| <b>S.N.</b> | <b>SNP IDs</b> | <b>Cultivars</b> | <b>Chromosomes/scaffolds</b> | <b>Physical positions (bp)</b> | <b>SNPs</b> |
|-------------|----------------|------------------|------------------------------|--------------------------------|-------------|
| 41686       | CadSNP17281    | <i>Desi</i>      | Ca_Desig_denovo              | 15806235                       | (C/T)       |
| 41687       | CadSNP17282    | <i>Desi</i>      | Ca_Desig_denovo              | 15811960                       | (A/C)       |
| 41688       | CadSNP17283    | <i>Desi</i>      | Ca_Desig_denovo              | 15811990                       | (T/C)       |
| 41689       | CadSNP17284    | <i>Desi</i>      | Ca_Desig_denovo              | 15819589                       | (C/T)       |
| 41690       | CadSNP17285    | <i>Desi</i>      | Ca_Desig_denovo              | 15819670                       | (C/A)       |
| 41691       | CadSNP17286    | <i>Desi</i>      | Ca_Desig_denovo              | 15824869                       | (G/A)       |
| 41692       | CadSNP17287    | <i>Desi</i>      | Ca_Desig_denovo              | 15827680                       | (C/T)       |
| 41693       | CadSNP17288    | <i>Desi</i>      | Ca_Desig_denovo              | 15840504                       | (A/C)       |
| 41694       | CadSNP17289    | <i>Desi</i>      | Ca_Desig_denovo              | 15840505                       | (G/A)       |
| 41695       | CadSNP17290    | <i>Desi</i>      | Ca_Desig_denovo              | 15841021                       | (A/G)       |
| 41696       | CadSNP17291    | <i>Desi</i>      | Ca_Desig_denovo              | 15841052                       | (A/G)       |
| 41697       | CadSNP17292    | <i>Desi</i>      | Ca_Desig_denovo              | 15844874                       | (A/C)       |
| 41698       | CadSNP17293    | <i>Desi</i>      | Ca_Desig_denovo              | 15844876                       | (A/G)       |
| 41699       | CadSNP17294    | <i>Desi</i>      | Ca_Desig_denovo              | 15848035                       | (T/G)       |
| 41700       | CadSNP17295    | <i>Desi</i>      | Ca_Desig_denovo              | 15851587                       | (T/G)       |
| 41701       | CadSNP17296    | <i>Desi</i>      | Ca_Desig_denovo              | 15851590                       | (G/C)       |
| 41702       | CadSNP17297    | <i>Desi</i>      | Ca_Desig_denovo              | 15852304                       | (T/C)       |
| 41703       | CadSNP17298    | <i>Desi</i>      | Ca_Desig_denovo              | 15862784                       | (G/T)       |
| 41704       | CadSNP17299    | <i>Desi</i>      | Ca_Desig_denovo              | 15862811                       | (T/C)       |
| 41705       | CadSNP17300    | <i>Desi</i>      | Ca_Desig_denovo              | 15867470                       | (C/G)       |
| 41706       | CadSNP17301    | <i>Desi</i>      | Ca_Desig_denovo              | 15874269                       | (A/G)       |
| 41707       | CadSNP17302    | <i>Desi</i>      | Ca_Desig_denovo              | 15874277                       | (G/A)       |
| 41708       | CadSNP17303    | <i>Desi</i>      | Ca_Desig_denovo              | 15876350                       | (G/A)       |
| 41709       | CadSNP17304    | <i>Desi</i>      | Ca_Desig_denovo              | 15876402                       | (A/G)       |
| 41710       | CadSNP17305    | <i>Desi</i>      | Ca_Desig_denovo              | 15876555                       | (T/C)       |
| 41711       | CadSNP17306    | <i>Desi</i>      | Ca_Desig_denovo              | 15876881                       | (A/G)       |
| 41712       | CadSNP17307    | <i>Desi</i>      | Ca_Desig_denovo              | 15876888                       | (T/C)       |
| 41713       | CadSNP17308    | <i>Desi</i>      | Ca_Desig_denovo              | 15876894                       | (T/C)       |
| 41714       | CadSNP17309    | <i>Desi</i>      | Ca_Desig_denovo              | 15881166                       | (G/C)       |
| 41715       | CadSNP17310    | <i>Desi</i>      | Ca_Desig_denovo              | 15881223                       | (G/T)       |
| 41716       | CadSNP17311    | <i>Desi</i>      | Ca_Desig_denovo              | 15882049                       | (G/C)       |
| 41717       | CadSNP17312    | <i>Desi</i>      | Ca_Desig_denovo              | 15882067                       | (T/C)       |
| 41718       | CadSNP17313    | <i>Desi</i>      | Ca_Desig_denovo              | 15885333                       | (A/T)       |
| 41719       | CadSNP17314    | <i>Desi</i>      | Ca_Desig_denovo              | 15885928                       | (G/A)       |
| 41720       | CadSNP17315    | <i>Desi</i>      | Ca_Desig_denovo              | 15885952                       | (C/T)       |
| 41721       | CadSNP17316    | <i>Desi</i>      | Ca_Desig_denovo              | 15888466                       | (T/C)       |
| 41722       | CadSNP17317    | <i>Desi</i>      | Ca_Desig_denovo              | 15888493                       | (A/T)       |
| 41723       | CadSNP17318    | <i>Desi</i>      | Ca_Desig_denovo              | 15888984                       | (C/G)       |

| <b>S.N.</b> | <b>SNP IDs</b> | <b>Cultivars</b> | <b>Chromosomes/scaffolds</b> | <b>Physical positions (bp)</b> | <b>SNPs</b> |
|-------------|----------------|------------------|------------------------------|--------------------------------|-------------|
| 41724       | CadSNP17319    | <i>Desi</i>      | Ca_Desig_denovo              | 15889032                       | (C/T)       |
| 41725       | CadSNP17320    | <i>Desi</i>      | Ca_Desig_denovo              | 15893114                       | (C/T)       |
| 41726       | CadSNP17321    | <i>Desi</i>      | Ca_Desig_denovo              | 15893122                       | (G/C)       |
| 41727       | CadSNP17322    | <i>Desi</i>      | Ca_Desig_denovo              | 15896737                       | (A/G)       |
| 41728       | CadSNP17323    | <i>Desi</i>      | Ca_Desig_denovo              | 15896742                       | (C/T)       |
| 41729       | CadSNP17324    | <i>Desi</i>      | Ca_Desig_denovo              | 15905063                       | (C/G)       |
| 41730       | CadSNP17325    | <i>Desi</i>      | Ca_Desig_denovo              | 15905068                       | (A/C)       |
| 41731       | CadSNP17326    | <i>Desi</i>      | Ca_Desig_denovo              | 15908003                       | (G/C)       |
| 41732       | CadSNP17327    | <i>Desi</i>      | Ca_Desig_denovo              | 15919199                       | (C/T)       |
| 41733       | CadSNP17328    | <i>Desi</i>      | Ca_Desig_denovo              | 15921277                       | (G/A)       |
| 41734       | CadSNP17329    | <i>Desi</i>      | Ca_Desig_denovo              | 15922283                       | (T/C)       |
| 41735       | CadSNP17330    | <i>Desi</i>      | Ca_Desig_denovo              | 15922286                       | (C/G)       |
| 41736       | CadSNP17331    | <i>Desi</i>      | Ca_Desig_denovo              | 15928973                       | (C/G)       |
| 41737       | CadSNP17332    | <i>Desi</i>      | Ca_Desig_denovo              | 15932223                       | (G/A)       |
| 41738       | CadSNP17333    | <i>Desi</i>      | Ca_Desig_denovo              | 15933994                       | (C/G)       |
| 41739       | CadSNP17334    | <i>Desi</i>      | Ca_Desig_denovo              | 15934060                       | (T/C)       |
| 41740       | CadSNP17335    | <i>Desi</i>      | Ca_Desig_denovo              | 15934743                       | (C/T)       |
| 41741       | CadSNP17336    | <i>Desi</i>      | Ca_Desig_denovo              | 15934748                       | (G/A)       |
| 41742       | CadSNP17337    | <i>Desi</i>      | Ca_Desig_denovo              | 15936586                       | (T/G)       |
| 41743       | CadSNP17338    | <i>Desi</i>      | Ca_Desig_denovo              | 15936592                       | (A/G)       |
| 41744       | CadSNP17339    | <i>Desi</i>      | Ca_Desig_denovo              | 15940311                       | (A/G)       |
| 41745       | CadSNP17340    | <i>Desi</i>      | Ca_Desig_denovo              | 15940346                       | (C/A)       |
| 41746       | CadSNP17341    | <i>Desi</i>      | Ca_Desig_denovo              | 15941468                       | (A/G)       |
| 41747       | CadSNP17342    | <i>Desi</i>      | Ca_Desig_denovo              | 15941474                       | (A/G)       |
| 41748       | CadSNP17343    | <i>Desi</i>      | Ca_Desig_denovo              | 15942240                       | (T/G)       |
| 41749       | CadSNP17344    | <i>Desi</i>      | Ca_Desig_denovo              | 15944393                       | (G/C)       |
| 41750       | CadSNP17345    | <i>Desi</i>      | Ca_Desig_denovo              | 15946922                       | (C/G)       |
| 41751       | CadSNP17346    | <i>Desi</i>      | Ca_Desig_denovo              | 15946964                       | (C/T)       |
| 41752       | CadSNP17347    | <i>Desi</i>      | Ca_Desig_denovo              | 15947096                       | (C/G)       |
| 41753       | CadSNP17348    | <i>Desi</i>      | Ca_Desig_denovo              | 15947107                       | (A/C)       |
| 41754       | CadSNP17349    | <i>Desi</i>      | Ca_Desig_denovo              | 15947313                       | (C/T)       |
| 41755       | CadSNP17350    | <i>Desi</i>      | Ca_Desig_denovo              | 15947360                       | (T/G)       |
| 41756       | CadSNP17351    | <i>Desi</i>      | Ca_Desig_denovo              | 15952318                       | (G/A)       |
| 41757       | CadSNP17352    | <i>Desi</i>      | Ca_Desig_denovo              | 15956033                       | (T/C)       |
| 41758       | CadSNP17353    | <i>Desi</i>      | Ca_Desig_denovo              | 15958600                       | (A/G)       |
| 41759       | CadSNP17354    | <i>Desi</i>      | Ca_Desig_denovo              | 15961008                       | (G/C)       |
| 41760       | CadSNP17355    | <i>Desi</i>      | Ca_Desig_denovo              | 15963635                       | (A/G)       |
| 41761       | CadSNP17356    | <i>Desi</i>      | Ca_Desig_denovo              | 15967308                       | (A/G)       |

| <b>S.N.</b> | <b>SNP IDs</b> | <b>Cultivars</b> | <b>Chromosomes/scaffolds</b> | <b>Physical positions (bp)</b> | <b>SNPs</b> |
|-------------|----------------|------------------|------------------------------|--------------------------------|-------------|
| 41762       | CadSNP17357    | <i>Desi</i>      | Ca_Desig_denovo              | 15967471                       | (T/C)       |
| 41763       | CadSNP17358    | <i>Desi</i>      | Ca_Desig_denovo              | 15967484                       | (G/A)       |
| 41764       | CadSNP17359    | <i>Desi</i>      | Ca_Desig_denovo              | 15971177                       | (G/C)       |
| 41765       | CadSNP17360    | <i>Desi</i>      | Ca_Desig_denovo              | 15971222                       | (G/C)       |
| 41766       | CadSNP17361    | <i>Desi</i>      | Ca_Desig_denovo              | 15974404                       | (C/A)       |
| 41767       | CadSNP17362    | <i>Desi</i>      | Ca_Desig_denovo              | 15976276                       | (C/A)       |
| 41768       | CadSNP17363    | <i>Desi</i>      | Ca_Desig_denovo              | 15980626                       | (T/C)       |
| 41769       | CadSNP17364    | <i>Desi</i>      | Ca_Desig_denovo              | 15980653                       | (C/G)       |
| 41770       | CadSNP17365    | <i>Desi</i>      | Ca_Desig_denovo              | 15980656                       | (C/T)       |
| 41771       | CadSNP17366    | <i>Desi</i>      | Ca_Desig_denovo              | 15981505                       | (T/C)       |
| 41772       | CadSNP17367    | <i>Desi</i>      | Ca_Desig_denovo              | 15987165                       | (A/C)       |
| 41773       | CadSNP17368    | <i>Desi</i>      | Ca_Desig_denovo              | 15987166                       | (G/T)       |
| 41774       | CadSNP17369    | <i>Desi</i>      | Ca_Desig_denovo              | 15987281                       | (G/A)       |
| 41775       | CadSNP17370    | <i>Desi</i>      | Ca_Desig_denovo              | 15987451                       | (T/G)       |
| 41776       | CadSNP17371    | <i>Desi</i>      | Ca_Desig_denovo              | 15987454                       | (C/T)       |
| 41777       | CadSNP17372    | <i>Desi</i>      | Ca_Desig_denovo              | 15989312                       | (T/G)       |
| 41778       | CadSNP17373    | <i>Desi</i>      | Ca_Desig_denovo              | 15990155                       | (T/C)       |
| 41779       | CadSNP17374    | <i>Desi</i>      | Ca_Desig_denovo              | 15990167                       | (C/T)       |
| 41780       | CadSNP17375    | <i>Desi</i>      | Ca_Desig_denovo              | 15990543                       | (C/G)       |
| 41781       | CadSNP17376    | <i>Desi</i>      | Ca_Desig_denovo              | 15990560                       | (C/G)       |
| 41782       | CadSNP17377    | <i>Desi</i>      | Ca_Desig_denovo              | 15993786                       | (A/G)       |
| 41783       | CadSNP17378    | <i>Desi</i>      | Ca_Desig_denovo              | 15993797                       | (A/G)       |
| 41784       | CadSNP17379    | <i>Desi</i>      | Ca_Desig_denovo              | 15993813                       | (C/T)       |
| 41785       | CadSNP17380    | <i>Desi</i>      | Ca_Desig_denovo              | 16001698                       | (C/G)       |
| 41786       | CadSNP17381    | <i>Desi</i>      | Ca_Desig_denovo              | 16007366                       | (G/T)       |
| 41787       | CadSNP17382    | <i>Desi</i>      | Ca_Desig_denovo              | 16007367                       | (T/C)       |
| 41788       | CadSNP17383    | <i>Desi</i>      | Ca_Desig_denovo              | 16012100                       | (G/C)       |
| 41789       | CadSNP17384    | <i>Desi</i>      | Ca_Desig_denovo              | 16012171                       | (C/T)       |
| 41790       | CadSNP17385    | <i>Desi</i>      | Ca_Desig_denovo              | 16012180                       | (C/G)       |
| 41791       | CadSNP17386    | <i>Desi</i>      | Ca_Desig_denovo              | 16012183                       | (C/T)       |
| 41792       | CadSNP17387    | <i>Desi</i>      | Ca_Desig_denovo              | 16013738                       | (A/G)       |
| 41793       | CadSNP17388    | <i>Desi</i>      | Ca_Desig_denovo              | 16015673                       | (G/A)       |
| 41794       | CadSNP17389    | <i>Desi</i>      | Ca_Desig_denovo              | 16015681                       | (G/T)       |
| 41795       | CadSNP17390    | <i>Desi</i>      | Ca_Desig_denovo              | 16016290                       | (C/T)       |
| 41796       | CadSNP17391    | <i>Desi</i>      | Ca_Desig_denovo              | 16023111                       | (C/T)       |
| 41797       | CadSNP17392    | <i>Desi</i>      | Ca_Desig_denovo              | 16027560                       | (G/C)       |
| 41798       | CadSNP17393    | <i>Desi</i>      | Ca_Desig_denovo              | 16027579                       | (C/G)       |
| 41799       | CadSNP17394    | <i>Desi</i>      | Ca_Desig_denovo              | 16048633                       | (C/T)       |

| <b>S.N.</b> | <b>SNP IDs</b> | <b>Cultivars</b> | <b>Chromosomes/scaffolds</b> | <b>Physical positions (bp)</b> | <b>SNPs</b> |
|-------------|----------------|------------------|------------------------------|--------------------------------|-------------|
| 41800       | CadSNP17395    | <i>Desi</i>      | Ca_Desig_denovo              | 16050433                       | (A/G)       |
| 41801       | CadSNP17396    | <i>Desi</i>      | Ca_Desig_denovo              | 16052975                       | (G/A)       |
| 41802       | CadSNP17397    | <i>Desi</i>      | Ca_Desig_denovo              | 16052990                       | (A/G)       |
| 41803       | CadSNP17398    | <i>Desi</i>      | Ca_Desig_denovo              | 16053691                       | (C/A)       |
| 41804       | CadSNP17399    | <i>Desi</i>      | Ca_Desig_denovo              | 16068845                       | (G/A)       |
| 41805       | CadSNP17400    | <i>Desi</i>      | Ca_Desig_denovo              | 16070618                       | (G/C)       |
| 41806       | CadSNP17401    | <i>Desi</i>      | Ca_Desig_denovo              | 16070633                       | (C/T)       |
| 41807       | CadSNP17402    | <i>Desi</i>      | Ca_Desig_denovo              | 16071180                       | (G/A)       |
| 41808       | CadSNP17403    | <i>Desi</i>      | Ca_Desig_denovo              | 16073083                       | (G/A)       |
| 41809       | CadSNP17404    | <i>Desi</i>      | Ca_Desig_denovo              | 16078276                       | (A/G)       |
| 41810       | CadSNP17405    | <i>Desi</i>      | Ca_Desig_denovo              | 16081499                       | (C/G)       |
| 41811       | CadSNP17406    | <i>Desi</i>      | Ca_Desig_denovo              | 16081502                       | (A/G)       |
| 41812       | CadSNP17407    | <i>Desi</i>      | Ca_Desig_denovo              | 16082967                       | (A/G)       |
| 41813       | CadSNP17408    | <i>Desi</i>      | Ca_Desig_denovo              | 16082985                       | (C/G)       |
| 41814       | CadSNP17409    | <i>Desi</i>      | Ca_Desig_denovo              | 16085385                       | (C/G)       |
| 41815       | CadSNP17410    | <i>Desi</i>      | Ca_Desig_denovo              | 16085390                       | (G/C)       |
| 41816       | CadSNP17411    | <i>Desi</i>      | Ca_Desig_denovo              | 16097572                       | (A/G)       |
| 41817       | CadSNP17412    | <i>Desi</i>      | Ca_Desig_denovo              | 16097617                       | (C/G)       |
| 41818       | CadSNP17413    | <i>Desi</i>      | Ca_Desig_denovo              | 16130113                       | (C/A)       |
| 41819       | CadSNP17414    | <i>Desi</i>      | Ca_Desig_denovo              | 16133410                       | (G/T)       |
| 41820       | CadSNP17415    | <i>Desi</i>      | Ca_Desig_denovo              | 16133412                       | (T/C)       |
| 41821       | CadSNP17416    | <i>Desi</i>      | Ca_Desig_denovo              | 16138498                       | (T/C)       |
| 41822       | CadSNP17417    | <i>Desi</i>      | Ca_Desig_denovo              | 16145078                       | (T/C)       |
| 41823       | CadSNP17418    | <i>Desi</i>      | Ca_Desig_denovo              | 16146068                       | (A/C)       |
| 41824       | CadSNP17419    | <i>Desi</i>      | Ca_Desig_denovo              | 16146079                       | (C/T)       |
| 41825       | CadSNP17420    | <i>Desi</i>      | Ca_Desig_denovo              | 16156286                       | (G/C)       |
| 41826       | CadSNP17421    | <i>Desi</i>      | Ca_Desig_denovo              | 16157199                       | (G/A)       |
| 41827       | CadSNP17422    | <i>Desi</i>      | Ca_Desig_denovo              | 16157223                       | (A/C)       |
| 41828       | CadSNP17423    | <i>Desi</i>      | Ca_Desig_denovo              | 16162682                       | (G/A)       |
| 41829       | CadSNP17424    | <i>Desi</i>      | Ca_Desig_denovo              | 16175879                       | (G/A)       |
| 41830       | CadSNP17425    | <i>Desi</i>      | Ca_Desig_denovo              | 16175941                       | (T/C)       |
| 41831       | CadSNP17426    | <i>Desi</i>      | Ca_Desig_denovo              | 16182913                       | (G/T)       |
| 41832       | CadSNP17427    | <i>Desi</i>      | Ca_Desig_denovo              | 16194407                       | (A/T)       |
| 41833       | CadSNP17428    | <i>Desi</i>      | Ca_Desig_denovo              | 16202847                       | (C/T)       |
| 41834       | CadSNP17429    | <i>Desi</i>      | Ca_Desig_denovo              | 16205008                       | (C/G)       |
| 41835       | CadSNP17430    | <i>Desi</i>      | Ca_Desig_denovo              | 16212745                       | (C/T)       |
| 41836       | CadSNP17431    | <i>Desi</i>      | Ca_Desig_denovo              | 16212775                       | (G/T)       |
| 41837       | CadSNP17432    | <i>Desi</i>      | Ca_Desig_denovo              | 16213778                       | (C/G)       |

| <b>S.N.</b> | <b>SNP IDs</b> | <b>Cultivars</b> | <b>Chromosomes/scaffolds</b> | <b>Physical positions (bp)</b> | <b>SNPs</b> |
|-------------|----------------|------------------|------------------------------|--------------------------------|-------------|
| 41838       | CadSNP17433    | <i>Desi</i>      | Ca_Desig_denovo              | 16213805                       | (A/C)       |
| 41839       | CadSNP17434    | <i>Desi</i>      | Ca_Desig_denovo              | 16219310                       | (C/T)       |
| 41840       | CadSNP17435    | <i>Desi</i>      | Ca_Desig_denovo              | 16223039                       | (A/G)       |
| 41841       | CadSNP17436    | <i>Desi</i>      | Ca_Desig_denovo              | 16224145                       | (G/T)       |
| 41842       | CadSNP17437    | <i>Desi</i>      | Ca_Desig_denovo              | 16224183                       | (T/C)       |
| 41843       | CadSNP17438    | <i>Desi</i>      | Ca_Desig_denovo              | 16231341                       | (G/C)       |
| 41844       | CadSNP17439    | <i>Desi</i>      | Ca_Desig_denovo              | 16234546                       | (A/C)       |
| 41845       | CadSNP17440    | <i>Desi</i>      | Ca_Desig_denovo              | 16242038                       | (C/T)       |
| 41846       | CadSNP17441    | <i>Desi</i>      | Ca_Desig_denovo              | 16242067                       | (A/G)       |
| 41847       | CadSNP17442    | <i>Desi</i>      | Ca_Desig_denovo              | 16242880                       | (G/A)       |
| 41848       | CadSNP17443    | <i>Desi</i>      | Ca_Desig_denovo              | 16248797                       | (T/C)       |
| 41849       | CadSNP17444    | <i>Desi</i>      | Ca_Desig_denovo              | 16251770                       | (G/A)       |
| 41850       | CadSNP17445    | <i>Desi</i>      | Ca_Desig_denovo              | 16251826                       | (C/T)       |
| 41851       | CadSNP17446    | <i>Desi</i>      | Ca_Desig_denovo              | 16253363                       | (G/A)       |
| 41852       | CadSNP17447    | <i>Desi</i>      | Ca_Desig_denovo              | 16254089                       | (G/T)       |
| 41853       | CadSNP17448    | <i>Desi</i>      | Ca_Desig_denovo              | 16254091                       | (C/G)       |
| 41854       | CadSNP17449    | <i>Desi</i>      | Ca_Desig_denovo              | 16257169                       | (C/G)       |
| 41855       | CadSNP17450    | <i>Desi</i>      | Ca_Desig_denovo              | 16261447                       | (A/G)       |
| 41856       | CadSNP17451    | <i>Desi</i>      | Ca_Desig_denovo              | 16270173                       | (A/G)       |
| 41857       | CadSNP17452    | <i>Desi</i>      | Ca_Desig_denovo              | 16278368                       | (C/T)       |
| 41858       | CadSNP17453    | <i>Desi</i>      | Ca_Desig_denovo              | 16278377                       | (C/G)       |
| 41859       | CadSNP17454    | <i>Desi</i>      | Ca_Desig_denovo              | 16281257                       | (T/C)       |
| 41860       | CadSNP17455    | <i>Desi</i>      | Ca_Desig_denovo              | 16281272                       | (G/A)       |
| 41861       | CadSNP17456    | <i>Desi</i>      | Ca_Desig_denovo              | 16281444                       | (A/G)       |
| 41862       | CadSNP17457    | <i>Desi</i>      | Ca_Desig_denovo              | 16282369                       | (C/G)       |
| 41863       | CadSNP17458    | <i>Desi</i>      | Ca_Desig_denovo              | 16283218                       | (C/G)       |
| 41864       | CadSNP17459    | <i>Desi</i>      | Ca_Desig_denovo              | 16283278                       | (A/G)       |
| 41865       | CadSNP17460    | <i>Desi</i>      | Ca_Desig_denovo              | 16286202                       | (C/T)       |
| 41866       | CadSNP17461    | <i>Desi</i>      | Ca_Desig_denovo              | 16289802                       | (G/A)       |
| 41867       | CadSNP17462    | <i>Desi</i>      | Ca_Desig_denovo              | 16293113                       | (T/G)       |
| 41868       | CadSNP17463    | <i>Desi</i>      | Ca_Desig_denovo              | 16294468                       | (C/G)       |
| 41869       | CadSNP17464    | <i>Desi</i>      | Ca_Desig_denovo              | 16294480                       | (C/T)       |
| 41870       | CadSNP17465    | <i>Desi</i>      | Ca_Desig_denovo              | 16297817                       | (G/A)       |
| 41871       | CadSNP17466    | <i>Desi</i>      | Ca_Desig_denovo              | 16302926                       | (G/C)       |
| 41872       | CadSNP17467    | <i>Desi</i>      | Ca_Desig_denovo              | 16304684                       | (C/T)       |
| 41873       | CadSNP17468    | <i>Desi</i>      | Ca_Desig_denovo              | 16304687                       | (T/C)       |
| 41874       | CadSNP17469    | <i>Desi</i>      | Ca_Desig_denovo              | 16306468                       | (G/C)       |
| 41875       | CadSNP17470    | <i>Desi</i>      | Ca_Desig_denovo              | 16306645                       | (C/T)       |



| <b>S.N.</b> | <b>SNP IDs</b> | <b>Cultivars</b> | <b>Chromosomes/scaffolds</b> | <b>Physical positions (bp)</b> | <b>SNPs</b> |
|-------------|----------------|------------------|------------------------------|--------------------------------|-------------|
| 41876       | CadSNP17471    | <i>Desi</i>      | Ca_Desig_denovo              | 16309975                       | (T/A)       |
| 41877       | CadSNP17472    | <i>Desi</i>      | Ca_Desig_denovo              | 16312315                       | (G/A)       |
| 41878       | CadSNP17473    | <i>Desi</i>      | Ca_Desig_denovo              | 16312378                       | (A/G)       |
| 41879       | CadSNP17474    | <i>Desi</i>      | Ca_Desig_denovo              | 16316851                       | (G/A)       |
| 41880       | CadSNP17475    | <i>Desi</i>      | Ca_Desig_denovo              | 16325156                       | (A/G)       |
| 41881       | CadSNP17476    | <i>Desi</i>      | Ca_Desig_denovo              | 16325989                       | (G/A)       |
| 41882       | CadSNP17477    | <i>Desi</i>      | Ca_Desig_denovo              | 16326001                       | (A/G)       |
| 41883       | CadSNP17478    | <i>Desi</i>      | Ca_Desig_denovo              | 16326099                       | (G/A)       |
| 41884       | CadSNP17479    | <i>Desi</i>      | Ca_Desig_denovo              | 16328356                       | (G/A)       |
| 41885       | CadSNP17480    | <i>Desi</i>      | Ca_Desig_denovo              | 16330458                       | (T/C)       |
| 41886       | CadSNP17481    | <i>Desi</i>      | Ca_Desig_denovo              | 16330500                       | (T/C)       |
| 41887       | CadSNP17482    | <i>Desi</i>      | Ca_Desig_denovo              | 16332316                       | (A/G)       |
| 41888       | CadSNP17483    | <i>Desi</i>      | Ca_Desig_denovo              | 16332337                       | (G/T)       |
| 41889       | CadSNP17484    | <i>Desi</i>      | Ca_Desig_denovo              | 16336066                       | (C/T)       |
| 41890       | CadSNP17485    | <i>Desi</i>      | Ca_Desig_denovo              | 16337371                       | (A/G)       |
| 41891       | CadSNP17486    | <i>Desi</i>      | Ca_Desig_denovo              | 16339685                       | (A/G)       |
| 41892       | CadSNP17487    | <i>Desi</i>      | Ca_Desig_denovo              | 16339720                       | (C/A)       |
| 41893       | CadSNP17488    | <i>Desi</i>      | Ca_Desig_denovo              | 16343743                       | (A/G)       |
| 41894       | CadSNP17489    | <i>Desi</i>      | Ca_Desig_denovo              | 16343904                       | (A/C)       |
| 41895       | CadSNP17490    | <i>Desi</i>      | Ca_Desig_denovo              | 16343912                       | (T/C)       |
| 41896       | CadSNP17491    | <i>Desi</i>      | Ca_Desig_denovo              | 16345873                       | (A/G)       |
| 41897       | CadSNP17492    | <i>Desi</i>      | Ca_Desig_denovo              | 16348027                       | (C/G)       |
| 41898       | CadSNP17493    | <i>Desi</i>      | Ca_Desig_denovo              | 16351847                       | (T/C)       |
| 41899       | CadSNP17494    | <i>Desi</i>      | Ca_Desig_denovo              | 16354070                       | (G/A)       |
| 41900       | CadSNP17495    | <i>Desi</i>      | Ca_Desig_denovo              | 16354109                       | (G/A)       |
| 41901       | CadSNP17496    | <i>Desi</i>      | Ca_Desig_denovo              | 16354670                       | (G/C)       |
| 41902       | CadSNP17497    | <i>Desi</i>      | Ca_Desig_denovo              | 16354671                       | (C/T)       |
| 41903       | CadSNP17498    | <i>Desi</i>      | Ca_Desig_denovo              | 16357127                       | (T/G)       |
| 41904       | CadSNP17499    | <i>Desi</i>      | Ca_Desig_denovo              | 16357169                       | (G/C)       |
| 41905       | CadSNP17500    | <i>Desi</i>      | Ca_Desig_denovo              | 16357703                       | (A/C)       |
| 41906       | CadSNP17501    | <i>Desi</i>      | Ca_Desig_denovo              | 16357744                       | (C/G)       |
| 41907       | CadSNP17502    | <i>Desi</i>      | Ca_Desig_denovo              | 16361333                       | (C/T)       |
| 41908       | CadSNP17503    | <i>Desi</i>      | Ca_Desig_denovo              | 16361342                       | (C/T)       |
| 41909       | CadSNP17504    | <i>Desi</i>      | Ca_Desig_denovo              | 16365868                       | (C/G)       |
| 41910       | CadSNP17505    | <i>Desi</i>      | Ca_Desig_denovo              | 16365902                       | (G/A)       |
| 41911       | CadSNP17506    | <i>Desi</i>      | Ca_Desig_denovo              | 16365941                       | (A/G)       |
| 41912       | CadSNP17507    | <i>Desi</i>      | Ca_Desig_denovo              | 16369216                       | (G/A)       |
| 41913       | CadSNP17508    | <i>Desi</i>      | Ca_Desig_denovo              | 16369246                       | (A/T)       |

| <b>S.N.</b> | <b>SNP IDs</b> | <b>Cultivars</b> | <b>Chromosomes/scaffolds</b> | <b>Physical positions (bp)</b> | <b>SNPs</b> |
|-------------|----------------|------------------|------------------------------|--------------------------------|-------------|
| 41914       | CadSNP17509    | <i>Desi</i>      | Ca_Desig_denovo              | 16391830                       | (C/T)       |
| 41915       | CadSNP17510    | <i>Desi</i>      | Ca_Desig_denovo              | 16395373                       | (T/C)       |
| 41916       | CadSNP17511    | <i>Desi</i>      | Ca_Desig_denovo              | 16408025                       | (T/A)       |
| 41917       | CadSNP17512    | <i>Desi</i>      | Ca_Desig_denovo              | 16415017                       | (G/C)       |
| 41918       | CadSNP17513    | <i>Desi</i>      | Ca_Desig_denovo              | 16415056                       | (G/T)       |
| 41919       | CadSNP17514    | <i>Desi</i>      | Ca_Desig_denovo              | 16417752                       | (C/T)       |
| 41920       | CadSNP17515    | <i>Desi</i>      | Ca_Desig_denovo              | 16423630                       | (A/G)       |
| 41921       | CadSNP17516    | <i>Desi</i>      | Ca_Desig_denovo              | 16423654                       | (T/C)       |
| 41922       | CadSNP17517    | <i>Desi</i>      | Ca_Desig_denovo              | 16428510                       | (G/T)       |
| 41923       | CadSNP17518    | <i>Desi</i>      | Ca_Desig_denovo              | 16428516                       | (G/T)       |
| 41924       | CadSNP17519    | <i>Desi</i>      | Ca_Desig_denovo              | 16428521                       | (T/G)       |
| 41925       | CadSNP17520    | <i>Desi</i>      | Ca_Desig_denovo              | 16428538                       | (T/G)       |
| 41926       | CadSNP17521    | <i>Desi</i>      | Ca_Desig_denovo              | 16430533                       | (T/G)       |
| 41927       | CadSNP17522    | <i>Desi</i>      | Ca_Desig_denovo              | 16430905                       | (T/G)       |
| 41928       | CadSNP17523    | <i>Desi</i>      | Ca_Desig_denovo              | 16430948                       | (A/G)       |
| 41929       | CadSNP17524    | <i>Desi</i>      | Ca_Desig_denovo              | 16436650                       | (T/C)       |
| 41930       | CadSNP17525    | <i>Desi</i>      | Ca_Desig_denovo              | 16436889                       | (C/G)       |
| 41931       | CadSNP17526    | <i>Desi</i>      | Ca_Desig_denovo              | 16436965                       | (T/G)       |
| 41932       | CadSNP17527    | <i>Desi</i>      | Ca_Desig_denovo              | 16436986                       | (G/A)       |
| 41933       | CadSNP17528    | <i>Desi</i>      | Ca_Desig_denovo              | 16446146                       | (C/T)       |
| 41934       | CadSNP17529    | <i>Desi</i>      | Ca_Desig_denovo              | 16452085                       | (C/A)       |
| 41935       | CadSNP17530    | <i>Desi</i>      | Ca_Desig_denovo              | 16452142                       | (A/C)       |
| 41936       | CadSNP17531    | <i>Desi</i>      | Ca_Desig_denovo              | 16456105                       | (T/C)       |
| 41937       | CadSNP17532    | <i>Desi</i>      | Ca_Desig_denovo              | 16459157                       | (T/C)       |
| 41938       | CadSNP17533    | <i>Desi</i>      | Ca_Desig_denovo              | 16462355                       | (C/A)       |
| 41939       | CadSNP17534    | <i>Desi</i>      | Ca_Desig_denovo              | 16462357                       | (A/G)       |
| 41940       | CadSNP17535    | <i>Desi</i>      | Ca_Desig_denovo              | 16471723                       | (G/A)       |
| 41941       | CadSNP17536    | <i>Desi</i>      | Ca_Desig_denovo              | 16471750                       | (A/G)       |
| 41942       | CadSNP17537    | <i>Desi</i>      | Ca_Desig_denovo              | 16479755                       | (G/C)       |
| 41943       | CadSNP17538    | <i>Desi</i>      | Ca_Desig_denovo              | 16489661                       | (T/A)       |
| 41944       | CadSNP17539    | <i>Desi</i>      | Ca_Desig_denovo              | 16489684                       | (C/A)       |
| 41945       | CadSNP17540    | <i>Desi</i>      | Ca_Desig_denovo              | 16492055                       | (T/C)       |
| 41946       | CadSNP17541    | <i>Desi</i>      | Ca_Desig_denovo              | 16494845                       | (C/T)       |
| 41947       | CadSNP17542    | <i>Desi</i>      | Ca_Desig_denovo              | 16498514                       | (C/T)       |
| 41948       | CadSNP17543    | <i>Desi</i>      | Ca_Desig_denovo              | 16502372                       | (C/G)       |
| 41949       | CadSNP17544    | <i>Desi</i>      | Ca_Desig_denovo              | 16505021                       | (G/A)       |
| 41950       | CadSNP17545    | <i>Desi</i>      | Ca_Desig_denovo              | 16512667                       | (C/T)       |
| 41951       | CadSNP17546    | <i>Desi</i>      | Ca_Desig_denovo              | 16517077                       | (C/A)       |

| <b>S.N.</b> | <b>SNP IDs</b> | <b>Cultivars</b> | <b>Chromosomes/scaffolds</b> | <b>Physical positions (bp)</b> | <b>SNPs</b> |
|-------------|----------------|------------------|------------------------------|--------------------------------|-------------|
| 41952       | CadSNP17547    | <i>Desi</i>      | Ca_Desig_denovo              | 16519879                       | (A/G)       |
| 41953       | CadSNP17548    | <i>Desi</i>      | Ca_Desig_denovo              | 16519909                       | (G/A)       |
| 41954       | CadSNP17549    | <i>Desi</i>      | Ca_Desig_denovo              | 16521457                       | (G/A)       |
| 41955       | CadSNP17550    | <i>Desi</i>      | Ca_Desig_denovo              | 16524532                       | (T/C)       |
| 41956       | CadSNP17551    | <i>Desi</i>      | Ca_Desig_denovo              | 16527179                       | (T/C)       |
| 41957       | CadSNP17552    | <i>Desi</i>      | Ca_Desig_denovo              | 16527188                       | (T/C)       |
| 41958       | CadSNP17553    | <i>Desi</i>      | Ca_Desig_denovo              | 16528625                       | (G/A)       |
| 41959       | CadSNP17554    | <i>Desi</i>      | Ca_Desig_denovo              | 16529006                       | (G/T)       |
| 41960       | CadSNP17555    | <i>Desi</i>      | Ca_Desig_denovo              | 16533248                       | (G/T)       |
| 41961       | CadSNP17556    | <i>Desi</i>      | Ca_Desig_denovo              | 16537185                       | (C/T)       |
| 41962       | CadSNP17557    | <i>Desi</i>      | Ca_Desig_denovo              | 16541837                       | (G/C)       |
| 41963       | CadSNP17558    | <i>Desi</i>      | Ca_Desig_denovo              | 16542835                       | (T/G)       |
| 41964       | CadSNP17559    | <i>Desi</i>      | Ca_Desig_denovo              | 16545958                       | (G/C)       |
| 41965       | CadSNP17560    | <i>Desi</i>      | Ca_Desig_denovo              | 16549742                       | (C/A)       |
| 41966       | CadSNP17561    | <i>Desi</i>      | Ca_Desig_denovo              | 16549765                       | (A/G)       |
| 41967       | CadSNP17562    | <i>Desi</i>      | Ca_Desig_denovo              | 16555322                       | (C/T)       |
| 41968       | CadSNP17563    | <i>Desi</i>      | Ca_Desig_denovo              | 16562523                       | (T/G)       |
| 41969       | CadSNP17564    | <i>Desi</i>      | Ca_Desig_denovo              | 16566307                       | (G/C)       |
| 41970       | CadSNP17565    | <i>Desi</i>      | Ca_Desig_denovo              | 16571681                       | (T/G)       |
| 41971       | CadSNP17566    | <i>Desi</i>      | Ca_Desig_denovo              | 16589729                       | (G/A)       |
| 41972       | CadSNP17567    | <i>Desi</i>      | Ca_Desig_denovo              | 16590519                       | (G/A)       |
| 41973       | CadSNP17568    | <i>Desi</i>      | Ca_Desig_denovo              | 16590859                       | (T/G)       |
| 41974       | CadSNP17569    | <i>Desi</i>      | Ca_Desig_denovo              | 16593538                       | (T/C)       |
| 41975       | CadSNP17570    | <i>Desi</i>      | Ca_Desig_denovo              | 16594382                       | (G/A)       |
| 41976       | CadSNP17571    | <i>Desi</i>      | Ca_Desig_denovo              | 16594409                       | (G/C)       |
| 41977       | CadSNP17572    | <i>Desi</i>      | Ca_Desig_denovo              | 16595599                       | (T/C)       |
| 41978       | CadSNP17573    | <i>Desi</i>      | Ca_Desig_denovo              | 16601733                       | (C/G)       |
| 41979       | CadSNP17574    | <i>Desi</i>      | Ca_Desig_denovo              | 16601771                       | (T/C)       |
| 41980       | CadSNP17575    | <i>Desi</i>      | Ca_Desig_denovo              | 16609768                       | (G/A)       |
| 41981       | CadSNP17576    | <i>Desi</i>      | Ca_Desig_denovo              | 16609920                       | (G/A)       |
| 41982       | CadSNP17577    | <i>Desi</i>      | Ca_Desig_denovo              | 16611522                       | (A/G)       |
| 41983       | CadSNP17578    | <i>Desi</i>      | Ca_Desig_denovo              | 16617726                       | (C/T)       |
| 41984       | CadSNP17579    | <i>Desi</i>      | Ca_Desig_denovo              | 16617737                       | (A/G)       |
| 41985       | CadSNP17580    | <i>Desi</i>      | Ca_Desig_denovo              | 16621598                       | (G/A)       |
| 41986       | CadSNP17581    | <i>Desi</i>      | Ca_Desig_denovo              | 16622090                       | (C/T)       |
| 41987       | CadSNP17582    | <i>Desi</i>      | Ca_Desig_denovo              | 16622827                       | (C/G)       |
| 41988       | CadSNP17583    | <i>Desi</i>      | Ca_Desig_denovo              | 16633533                       | (G/C)       |
| 41989       | CadSNP17584    | <i>Desi</i>      | Ca_Desig_denovo              | 16633538                       | (T/C)       |

| <b>S.N.</b> | <b>SNP IDs</b> | <b>Cultivars</b> | <b>Chromosomes/scaffolds</b> | <b>Physical positions (bp)</b> | <b>SNPs</b> |
|-------------|----------------|------------------|------------------------------|--------------------------------|-------------|
| 41990       | CadSNP17585    | <i>Desi</i>      | Ca_Desig_denovo              | 16635414                       | (T/A)       |
| 41991       | CadSNP17586    | <i>Desi</i>      | Ca_Desig_denovo              | 16635451                       | (G/A)       |
| 41992       | CadSNP17587    | <i>Desi</i>      | Ca_Desig_denovo              | 16636991                       | (T/C)       |
| 41993       | CadSNP17588    | <i>Desi</i>      | Ca_Desig_denovo              | 16645638                       | (G/A)       |
| 41994       | CadSNP17589    | <i>Desi</i>      | Ca_Desig_denovo              | 16646680                       | (T/G)       |
| 41995       | CadSNP17590    | <i>Desi</i>      | Ca_Desig_denovo              | 16666824                       | (A/G)       |
| 41996       | CadSNP17591    | <i>Desi</i>      | Ca_Desig_denovo              | 16669175                       | (C/A)       |
| 41997       | CadSNP17592    | <i>Desi</i>      | Ca_Desig_denovo              | 16669178                       | (C/G)       |
| 41998       | CadSNP17593    | <i>Desi</i>      | Ca_Desig_denovo              | 16669426                       | (C/T)       |
| 41999       | CadSNP17594    | <i>Desi</i>      | Ca_Desig_denovo              | 16669428                       | (A/G)       |
| 42000       | CadSNP17595    | <i>Desi</i>      | Ca_Desig_denovo              | 16678589                       | (C/T)       |
| 42001       | CadSNP17596    | <i>Desi</i>      | Ca_Desig_denovo              | 16679130                       | (T/C)       |
| 42002       | CadSNP17597    | <i>Desi</i>      | Ca_Desig_denovo              | 16680307                       | (C/T)       |
| 42003       | CadSNP17598    | <i>Desi</i>      | Ca_Desig_denovo              | 16681908                       | (G/C)       |
| 42004       | CadSNP17599    | <i>Desi</i>      | Ca_Desig_denovo              | 16685613                       | (C/A)       |
| 42005       | CadSNP17600    | <i>Desi</i>      | Ca_Desig_denovo              | 16692969                       | (T/C)       |
| 42006       | CadSNP17601    | <i>Desi</i>      | Ca_Desig_denovo              | 16692994                       | (C/G)       |
| 42007       | CadSNP17602    | <i>Desi</i>      | Ca_Desig_denovo              | 16697352                       | (C/T)       |
| 42008       | CadSNP17603    | <i>Desi</i>      | Ca_Desig_denovo              | 16702248                       | (G/T)       |
| 42009       | CadSNP17604    | <i>Desi</i>      | Ca_Desig_denovo              | 16702914                       | (G/C)       |
| 42010       | CadSNP17605    | <i>Desi</i>      | Ca_Desig_denovo              | 16702932                       | (T/C)       |
| 42011       | CadSNP17606    | <i>Desi</i>      | Ca_Desig_denovo              | 16702936                       | (C/A)       |
| 42012       | CadSNP17607    | <i>Desi</i>      | Ca_Desig_denovo              | 16707529                       | (G/A)       |
| 42013       | CadSNP17608    | <i>Desi</i>      | Ca_Desig_denovo              | 16715680                       | (C/T)       |
| 42014       | CadSNP17609    | <i>Desi</i>      | Ca_Desig_denovo              | 16716311                       | (G/A)       |
| 42015       | CadSNP17610    | <i>Desi</i>      | Ca_Desig_denovo              | 16716357                       | (C/A)       |
| 42016       | CadSNP17611    | <i>Desi</i>      | Ca_Desig_denovo              | 16719392                       | (C/T)       |
| 42017       | CadSNP17612    | <i>Desi</i>      | Ca_Desig_denovo              | 16719394                       | (G/A)       |
| 42018       | CadSNP17613    | <i>Desi</i>      | Ca_Desig_denovo              | 16720371                       | (T/G)       |
| 42019       | CadSNP17614    | <i>Desi</i>      | Ca_Desig_denovo              | 16728135                       | (A/G)       |
| 42020       | CadSNP17615    | <i>Desi</i>      | Ca_Desig_denovo              | 16728183                       | (G/A)       |
| 42021       | CadSNP17616    | <i>Desi</i>      | Ca_Desig_denovo              | 16733969                       | (A/T)       |
| 42022       | CadSNP17617    | <i>Desi</i>      | Ca_Desig_denovo              | 16733974                       | (G/A)       |
| 42023       | CadSNP17618    | <i>Desi</i>      | Ca_Desig_denovo              | 16734986                       | (C/T)       |
| 42024       | CadSNP17619    | <i>Desi</i>      | Ca_Desig_denovo              | 16735042                       | (C/T)       |
| 42025       | CadSNP17620    | <i>Desi</i>      | Ca_Desig_denovo              | 16755702                       | (A/G)       |
| 42026       | CadSNP17621    | <i>Desi</i>      | Ca_Desig_denovo              | 16758683                       | (T/G)       |
| 42027       | CadSNP17622    | <i>Desi</i>      | Ca_Desig_denovo              | 16766825                       | (T/C)       |

| <b>S.N.</b> | <b>SNP IDs</b> | <b>Cultivars</b> | <b>Chromosomes/scaffolds</b> | <b>Physical positions (bp)</b> | <b>SNPs</b> |
|-------------|----------------|------------------|------------------------------|--------------------------------|-------------|
| 42028       | CadSNP17623    | <i>Desi</i>      | Ca_Desig_denovo              | 16766835                       | (T/C)       |
| 42029       | CadSNP17624    | <i>Desi</i>      | Ca_Desig_denovo              | 16773884                       | (T/G)       |
| 42030       | CadSNP17625    | <i>Desi</i>      | Ca_Desig_denovo              | 16778702                       | (G/A)       |
| 42031       | CadSNP17626    | <i>Desi</i>      | Ca_Desig_denovo              | 16778732                       | (A/G)       |
| 42032       | CadSNP17627    | <i>Desi</i>      | Ca_Desig_denovo              | 16780727                       | (T/G)       |
| 42033       | CadSNP17628    | <i>Desi</i>      | Ca_Desig_denovo              | 16798699                       | (T/C)       |
| 42034       | CadSNP17629    | <i>Desi</i>      | Ca_Desig_denovo              | 16798708                       | (A/G)       |
| 42035       | CadSNP17630    | <i>Desi</i>      | Ca_Desig_denovo              | 16801487                       | (T/C)       |
| 42036       | CadSNP17631    | <i>Desi</i>      | Ca_Desig_denovo              | 16801496                       | (C/G)       |
| 42037       | CadSNP17632    | <i>Desi</i>      | Ca_Desig_denovo              | 16809886                       | (A/G)       |
| 42038       | CadSNP17633    | <i>Desi</i>      | Ca_Desig_denovo              | 16809910                       | (G/A)       |
| 42039       | CadSNP17634    | <i>Desi</i>      | Ca_Desig_denovo              | 16812920                       | (G/A)       |
| 42040       | CadSNP17635    | <i>Desi</i>      | Ca_Desig_denovo              | 16829010                       | (G/A)       |
| 42041       | CadSNP17636    | <i>Desi</i>      | Ca_Desig_denovo              | 16830140                       | (G/A)       |
| 42042       | CadSNP17637    | <i>Desi</i>      | Ca_Desig_denovo              | 16830406                       | (C/A)       |
| 42043       | CadSNP17638    | <i>Desi</i>      | Ca_Desig_denovo              | 16836940                       | (T/C)       |
| 42044       | CadSNP17639    | <i>Desi</i>      | Ca_Desig_denovo              | 16844750                       | (C/T)       |
| 42045       | CadSNP17640    | <i>Desi</i>      | Ca_Desig_denovo              | 16844810                       | (A/G)       |
| 42046       | CadSNP17641    | <i>Desi</i>      | Ca_Desig_denovo              | 16845042                       | (C/T)       |
| 42047       | CadSNP17642    | <i>Desi</i>      | Ca_Desig_denovo              | 16845073                       | (G/A)       |
| 42048       | CadSNP17643    | <i>Desi</i>      | Ca_Desig_denovo              | 16853841                       | (A/G)       |
| 42049       | CadSNP17644    | <i>Desi</i>      | Ca_Desig_denovo              | 16853862                       | (T/A)       |
| 42050       | CadSNP17645    | <i>Desi</i>      | Ca_Desig_denovo              | 16865745                       | (T/C)       |
| 42051       | CadSNP17646    | <i>Desi</i>      | Ca_Desig_denovo              | 16865748                       | (G/A)       |
| 42052       | CadSNP17647    | <i>Desi</i>      | Ca_Desig_denovo              | 16868363                       | (A/G)       |
| 42053       | CadSNP17648    | <i>Desi</i>      | Ca_Desig_denovo              | 16868405                       | (A/G)       |
| 42054       | CadSNP17649    | <i>Desi</i>      | Ca_Desig_denovo              | 16869682                       | (G/C)       |
| 42055       | CadSNP17650    | <i>Desi</i>      | Ca_Desig_denovo              | 16879660                       | (T/G)       |
| 42056       | CadSNP17651    | <i>Desi</i>      | Ca_Desig_denovo              | 16885729                       | (G/A)       |
| 42057       | CadSNP17652    | <i>Desi</i>      | Ca_Desig_denovo              | 16888026                       | (A/G)       |
| 42058       | CadSNP17653    | <i>Desi</i>      | Ca_Desig_denovo              | 16890697                       | (C/T)       |
| 42059       | CadSNP17654    | <i>Desi</i>      | Ca_Desig_denovo              | 16894026                       | (C/T)       |
| 42060       | CadSNP17655    | <i>Desi</i>      | Ca_Desig_denovo              | 16894028                       | (G/C)       |
| 42061       | CadSNP17656    | <i>Desi</i>      | Ca_Desig_denovo              | 16895448                       | (C/A)       |
| 42062       | CadSNP17657    | <i>Desi</i>      | Ca_Desig_denovo              | 16895621                       | (A/G)       |
| 42063       | CadSNP17658    | <i>Desi</i>      | Ca_Desig_denovo              | 16895648                       | (T/C)       |
| 42064       | CadSNP17659    | <i>Desi</i>      | Ca_Desig_denovo              | 16898053                       | (G/A)       |
| 42065       | CadSNP17660    | <i>Desi</i>      | Ca_Desig_denovo              | 16901660                       | (C/T)       |

| <b>S.N.</b> | <b>SNP IDs</b> | <b>Cultivars</b> | <b>Chromosomes/scaffolds</b> | <b>Physical positions (bp)</b> | <b>SNPs</b> |
|-------------|----------------|------------------|------------------------------|--------------------------------|-------------|
| 42066       | CadSNP17661    | <i>Desi</i>      | Ca_Desig_denovo              | 16902745                       | (G/T)       |
| 42067       | CadSNP17662    | <i>Desi</i>      | Ca_Desig_denovo              | 16906091                       | (C/A)       |
| 42068       | CadSNP17663    | <i>Desi</i>      | Ca_Desig_denovo              | 16906097                       | (C/T)       |
| 42069       | CadSNP17664    | <i>Desi</i>      | Ca_Desig_denovo              | 16906099                       | (A/T)       |
| 42070       | CadSNP17665    | <i>Desi</i>      | Ca_Desig_denovo              | 16906328                       | (G/A)       |
| 42071       | CadSNP17666    | <i>Desi</i>      | Ca_Desig_denovo              | 16906333                       | (C/T)       |
| 42072       | CadSNP17667    | <i>Desi</i>      | Ca_Desig_denovo              | 16909235                       | (A/C)       |
| 42073       | CadSNP17668    | <i>Desi</i>      | Ca_Desig_denovo              | 16909567                       | (C/G)       |
| 42074       | CadSNP17669    | <i>Desi</i>      | Ca_Desig_denovo              | 16909594                       | (A/G)       |
| 42075       | CadSNP17670    | <i>Desi</i>      | Ca_Desig_denovo              | 16917526                       | (C/T)       |
| 42076       | CadSNP17671    | <i>Desi</i>      | Ca_Desig_denovo              | 16917538                       | (C/G)       |
| 42077       | CadSNP17672    | <i>Desi</i>      | Ca_Desig_denovo              | 16922812                       | (T/C)       |
| 42078       | CadSNP17673    | <i>Desi</i>      | Ca_Desig_denovo              | 16931599                       | (A/G)       |
| 42079       | CadSNP17674    | <i>Desi</i>      | Ca_Desig_denovo              | 16931670                       | (T/G)       |
| 42080       | CadSNP17675    | <i>Desi</i>      | Ca_Desig_denovo              | 16936857                       | (T/C)       |
| 42081       | CadSNP17676    | <i>Desi</i>      | Ca_Desig_denovo              | 16937263                       | (A/G)       |
| 42082       | CadSNP17677    | <i>Desi</i>      | Ca_Desig_denovo              | 16944380                       | (C/T)       |
| 42083       | CadSNP17678    | <i>Desi</i>      | Ca_Desig_denovo              | 16947744                       | (T/G)       |
| 42084       | CadSNP17679    | <i>Desi</i>      | Ca_Desig_denovo              | 16955201                       | (A/C)       |
| 42085       | CadSNP17680    | <i>Desi</i>      | Ca_Desig_denovo              | 16959293                       | (A/C)       |
| 42086       | CadSNP17681    | <i>Desi</i>      | Ca_Desig_denovo              | 16970225                       | (G/C)       |
| 42087       | CadSNP17682    | <i>Desi</i>      | Ca_Desig_denovo              | 16970237                       | (A/C)       |
| 42088       | CadSNP17683    | <i>Desi</i>      | Ca_Desig_denovo              | 16970468                       | (A/C)       |
| 42089       | CadSNP17684    | <i>Desi</i>      | Ca_Desig_denovo              | 16976714                       | (G/A)       |
| 42090       | CadSNP17685    | <i>Desi</i>      | Ca_Desig_denovo              | 16976726                       | (A/G)       |
| 42091       | CadSNP17686    | <i>Desi</i>      | Ca_Desig_denovo              | 16980980                       | (G/C)       |
| 42092       | CadSNP17687    | <i>Desi</i>      | Ca_Desig_denovo              | 16982746                       | (C/T)       |
| 42093       | CadSNP17688    | <i>Desi</i>      | Ca_Desig_denovo              | 16985611                       | (T/G)       |
| 42094       | CadSNP17689    | <i>Desi</i>      | Ca_Desig_denovo              | 16988464                       | (C/G)       |
| 42095       | CadSNP17690    | <i>Desi</i>      | Ca_Desig_denovo              | 16988473                       | (T/C)       |
| 42096       | CadSNP17691    | <i>Desi</i>      | Ca_Desig_denovo              | 16992720                       | (T/A)       |
| 42097       | CadSNP17692    | <i>Desi</i>      | Ca_Desig_denovo              | 16999290                       | (A/G)       |
| 42098       | CadSNP17693    | <i>Desi</i>      | Ca_Desig_denovo              | 16999322                       | (C/T)       |
| 42099       | CadSNP17694    | <i>Desi</i>      | Ca_Desig_denovo              | 16999352                       | (T/G)       |
| 42100       | CadSNP17695    | <i>Desi</i>      | Ca_Desig_denovo              | 17000658                       | (G/A)       |
| 42101       | CadSNP17696    | <i>Desi</i>      | Ca_Desig_denovo              | 17004226                       | (G/T)       |
| 42102       | CadSNP17697    | <i>Desi</i>      | Ca_Desig_denovo              | 17004245                       | (G/C)       |
| 42103       | CadSNP17698    | <i>Desi</i>      | Ca_Desig_denovo              | 17020165                       | (G/C)       |

| <b>S.N.</b> | <b>SNP IDs</b> | <b>Cultivars</b> | <b>Chromosomes/scaffolds</b> | <b>Physical positions (bp)</b> | <b>SNPs</b> |
|-------------|----------------|------------------|------------------------------|--------------------------------|-------------|
| 42104       | CadSNP17699    | <i>Desi</i>      | Ca_Desig_denovo              | 17023928                       | (G/C)       |
| 42105       | CadSNP17700    | <i>Desi</i>      | Ca_Desig_denovo              | 17025122                       | (A/G)       |
| 42106       | CadSNP17701    | <i>Desi</i>      | Ca_Desig_denovo              | 17028401                       | (G/C)       |
| 42107       | CadSNP17702    | <i>Desi</i>      | Ca_Desig_denovo              | 17028434                       | (C/T)       |
| 42108       | CadSNP17703    | <i>Desi</i>      | Ca_Desig_denovo              | 17028596                       | (G/A)       |
| 42109       | CadSNP17704    | <i>Desi</i>      | Ca_Desig_denovo              | 17030635                       | (C/T)       |
| 42110       | CadSNP17705    | <i>Desi</i>      | Ca_Desig_denovo              | 17030642                       | (G/A)       |
| 42111       | CadSNP17706    | <i>Desi</i>      | Ca_Desig_denovo              | 17030822                       | (C/T)       |
| 42112       | CadSNP17707    | <i>Desi</i>      | Ca_Desig_denovo              | 17030829                       | (G/A)       |
| 42113       | CadSNP17708    | <i>Desi</i>      | Ca_Desig_denovo              | 17047373                       | (T/C)       |
| 42114       | CadSNP17709    | <i>Desi</i>      | Ca_Desig_denovo              | 17047406                       | (G/A)       |
| 42115       | CadSNP17710    | <i>Desi</i>      | Ca_Desig_denovo              | 17050420                       | (G/A)       |
| 42116       | CadSNP17711    | <i>Desi</i>      | Ca_Desig_denovo              | 17050423                       | (C/G)       |
| 42117       | CadSNP17712    | <i>Desi</i>      | Ca_Desig_denovo              | 17052116                       | (C/T)       |
| 42118       | CadSNP17713    | <i>Desi</i>      | Ca_Desig_denovo              | 17052188                       | (C/G)       |
| 42119       | CadSNP17714    | <i>Desi</i>      | Ca_Desig_denovo              | 17055625                       | (C/A)       |
| 42120       | CadSNP17715    | <i>Desi</i>      | Ca_Desig_denovo              | 17066822                       | (C/T)       |
| 42121       | CadSNP17716    | <i>Desi</i>      | Ca_Desig_denovo              | 17068313                       | (A/G)       |
| 42122       | CadSNP17717    | <i>Desi</i>      | Ca_Desig_denovo              | 17068319                       | (G/T)       |
| 42123       | CadSNP17718    | <i>Desi</i>      | Ca_Desig_denovo              | 17068957                       | (G/A)       |
| 42124       | CadSNP17719    | <i>Desi</i>      | Ca_Desig_denovo              | 17068970                       | (G/A)       |
| 42125       | CadSNP17720    | <i>Desi</i>      | Ca_Desig_denovo              | 17073917                       | (T/C)       |
| 42126       | CadSNP17721    | <i>Desi</i>      | Ca_Desig_denovo              | 17075017                       | (G/A)       |
| 42127       | CadSNP17722    | <i>Desi</i>      | Ca_Desig_denovo              | 17080969                       | (A/C)       |
| 42128       | CadSNP17723    | <i>Desi</i>      | Ca_Desig_denovo              | 17080990                       | (T/C)       |
| 42129       | CadSNP17724    | <i>Desi</i>      | Ca_Desig_denovo              | 17082455                       | (C/T)       |
| 42130       | CadSNP17725    | <i>Desi</i>      | Ca_Desig_denovo              | 17084404                       | (T/C)       |
| 42131       | CadSNP17726    | <i>Desi</i>      | Ca_Desig_denovo              | 17088664                       | (G/A)       |
| 42132       | CadSNP17727    | <i>Desi</i>      | Ca_Desig_denovo              | 17099315                       | (T/C)       |
| 42133       | CadSNP17728    | <i>Desi</i>      | Ca_Desig_denovo              | 17099339                       | (G/C)       |
| 42134       | CadSNP17729    | <i>Desi</i>      | Ca_Desig_denovo              | 17100653                       | (C/G)       |
| 42135       | CadSNP17730    | <i>Desi</i>      | Ca_Desig_denovo              | 17101787                       | (T/C)       |
| 42136       | CadSNP17731    | <i>Desi</i>      | Ca_Desig_denovo              | 17102348                       | (C/G)       |
| 42137       | CadSNP17732    | <i>Desi</i>      | Ca_Desig_denovo              | 17106461                       | (G/A)       |
| 42138       | CadSNP17733    | <i>Desi</i>      | Ca_Desig_denovo              | 17106473                       | (A/G)       |
| 42139       | CadSNP17734    | <i>Desi</i>      | Ca_Desig_denovo              | 17107011                       | (G/A)       |
| 42140       | CadSNP17735    | <i>Desi</i>      | Ca_Desig_denovo              | 17107020                       | (C/T)       |
| 42141       | CadSNP17736    | <i>Desi</i>      | Ca_Desig_denovo              | 17107939                       | (A/C)       |

| <b>S.N.</b> | <b>SNP IDs</b> | <b>Cultivars</b> | <b>Chromosomes/scaffolds</b> | <b>Physical positions (bp)</b> | <b>SNPs</b> |
|-------------|----------------|------------------|------------------------------|--------------------------------|-------------|
| 42142       | CadSNP17737    | <i>Desi</i>      | Ca_Desig_denovo              | 17108578                       | (A/T)       |
| 42143       | CadSNP17738    | <i>Desi</i>      | Ca_Desig_denovo              | 17108609                       | (A/G)       |
| 42144       | CadSNP17739    | <i>Desi</i>      | Ca_Desig_denovo              | 17119828                       | (T/G)       |
| 42145       | CadSNP17740    | <i>Desi</i>      | Ca_Desig_denovo              | 17124400                       | (G/C)       |
| 42146       | CadSNP17741    | <i>Desi</i>      | Ca_Desig_denovo              | 17124425                       | (A/G)       |
| 42147       | CadSNP17742    | <i>Desi</i>      | Ca_Desig_denovo              | 17126947                       | (T/C)       |
| 42148       | CadSNP17743    | <i>Desi</i>      | Ca_Desig_denovo              | 17135831                       | (C/T)       |
| 42149       | CadSNP17744    | <i>Desi</i>      | Ca_Desig_denovo              | 17136344                       | (A/G)       |
| 42150       | CadSNP17745    | <i>Desi</i>      | Ca_Desig_denovo              | 17136351                       | (T/A)       |
| 42151       | CadSNP17746    | <i>Desi</i>      | Ca_Desig_denovo              | 17144860                       | (A/G)       |
| 42152       | CadSNP17747    | <i>Desi</i>      | Ca_Desig_denovo              | 17144914                       | (A/C)       |
| 42153       | CadSNP17748    | <i>Desi</i>      | Ca_Desig_denovo              | 17148091                       | (A/G)       |
| 42154       | CadSNP17749    | <i>Desi</i>      | Ca_Desig_denovo              | 17148169                       | (T/C)       |
| 42155       | CadSNP17750    | <i>Desi</i>      | Ca_Desig_denovo              | 17153386                       | (A/C)       |
| 42156       | CadSNP17751    | <i>Desi</i>      | Ca_Desig_denovo              | 17159475                       | (G/A)       |
| 42157       | CadSNP17752    | <i>Desi</i>      | Ca_Desig_denovo              | 17159478                       | (T/G)       |
| 42158       | CadSNP17753    | <i>Desi</i>      | Ca_Desig_denovo              | 17162793                       | (G/T)       |
| 42159       | CadSNP17754    | <i>Desi</i>      | Ca_Desig_denovo              | 17162811                       | (C/G)       |
| 42160       | CadSNP17755    | <i>Desi</i>      | Ca_Desig_denovo              | 17169667                       | (C/A)       |
| 42161       | CadSNP17756    | <i>Desi</i>      | Ca_Desig_denovo              | 17169701                       | (T/G)       |
| 42162       | CadSNP17757    | <i>Desi</i>      | Ca_Desig_denovo              | 17169744                       | (C/T)       |
| 42163       | CadSNP17758    | <i>Desi</i>      | Ca_Desig_denovo              | 17169753                       | (A/G)       |
| 42164       | CadSNP17759    | <i>Desi</i>      | Ca_Desig_denovo              | 17183346                       | (A/G)       |
| 42165       | CadSNP17760    | <i>Desi</i>      | Ca_Desig_denovo              | 17184454                       | (A/G)       |
| 42166       | CadSNP17761    | <i>Desi</i>      | Ca_Desig_denovo              | 17190908                       | (C/A)       |
| 42167       | CadSNP17762    | <i>Desi</i>      | Ca_Desig_denovo              | 17190921                       | (C/G)       |
| 42168       | CadSNP17763    | <i>Desi</i>      | Ca_Desig_denovo              | 17197398                       | (T/G)       |
| 42169       | CadSNP17764    | <i>Desi</i>      | Ca_Desig_denovo              | 17201943                       | (G/A)       |
| 42170       | CadSNP17765    | <i>Desi</i>      | Ca_Desig_denovo              | 17202973                       | (G/C)       |
| 42171       | CadSNP17766    | <i>Desi</i>      | Ca_Desig_denovo              | 17204255                       | (G/C)       |
| 42172       | CadSNP17767    | <i>Desi</i>      | Ca_Desig_denovo              | 17204924                       | (G/T)       |
| 42173       | CadSNP17768    | <i>Desi</i>      | Ca_Desig_denovo              | 17204929                       | (G/C)       |
| 42174       | CadSNP17769    | <i>Desi</i>      | Ca_Desig_denovo              | 17205327                       | (A/G)       |
| 42175       | CadSNP17770    | <i>Desi</i>      | Ca_Desig_denovo              | 17207145                       | (G/A)       |
| 42176       | CadSNP17771    | <i>Desi</i>      | Ca_Desig_denovo              | 17207158                       | (C/T)       |
| 42177       | CadSNP17772    | <i>Desi</i>      | Ca_Desig_denovo              | 17217449                       | (C/T)       |
| 42178       | CadSNP17773    | <i>Desi</i>      | Ca_Desig_denovo              | 17219078                       | (T/A)       |
| 42179       | CadSNP17774    | <i>Desi</i>      | Ca_Desig_denovo              | 17223239                       | (C/G)       |



| <b>S.N.</b> | <b>SNP IDs</b> | <b>Cultivars</b> | <b>Chromosomes/scaffolds</b> | <b>Physical positions (bp)</b> | <b>SNPs</b> |
|-------------|----------------|------------------|------------------------------|--------------------------------|-------------|
| 42180       | CadSNP17775    | <i>Desi</i>      | Ca_Desig_denovo              | 17223285                       | (G/T)       |
| 42181       | CadSNP17776    | <i>Desi</i>      | Ca_Desig_denovo              | 17232196                       | (T/C)       |
| 42182       | CadSNP17777    | <i>Desi</i>      | Ca_Desig_denovo              | 17240849                       | (G/A)       |
| 42183       | CadSNP17778    | <i>Desi</i>      | Ca_Desig_denovo              | 17240885                       | (G/A)       |
| 42184       | CadSNP17779    | <i>Desi</i>      | Ca_Desig_denovo              | 17246522                       | (C/T)       |
| 42185       | CadSNP17780    | <i>Desi</i>      | Ca_Desig_denovo              | 17246528                       | (T/C)       |
| 42186       | CadSNP17781    | <i>Desi</i>      | Ca_Desig_denovo              | 17250298                       | (G/T)       |
| 42187       | CadSNP17782    | <i>Desi</i>      | Ca_Desig_denovo              | 17250316                       | (G/C)       |
| 42188       | CadSNP17783    | <i>Desi</i>      | Ca_Desig_denovo              | 17252437                       | (A/C)       |
| 42189       | CadSNP17784    | <i>Desi</i>      | Ca_Desig_denovo              | 17252470                       | (C/T)       |
| 42190       | CadSNP17785    | <i>Desi</i>      | Ca_Desig_denovo              | 17253766                       | (A/G)       |
| 42191       | CadSNP17786    | <i>Desi</i>      | Ca_Desig_denovo              | 17261201                       | (A/G)       |
| 42192       | CadSNP17787    | <i>Desi</i>      | Ca_Desig_denovo              | 17261228                       | (G/C)       |
| 42193       | CadSNP17788    | <i>Desi</i>      | Ca_Desig_denovo              | 17275940                       | (A/G)       |
| 42194       | CadSNP17789    | <i>Desi</i>      | Ca_Desig_denovo              | 17275958                       | (G/C)       |
| 42195       | CadSNP17790    | <i>Desi</i>      | Ca_Desig_denovo              | 17279899                       | (A/G)       |
| 42196       | CadSNP17791    | <i>Desi</i>      | Ca_Desig_denovo              | 17288071                       | (A/G)       |
| 42197       | CadSNP17792    | <i>Desi</i>      | Ca_Desig_denovo              | 17288104                       | (A/G)       |
| 42198       | CadSNP17793    | <i>Desi</i>      | Ca_Desig_denovo              | 17292334                       | (T/C)       |
| 42199       | CadSNP17794    | <i>Desi</i>      | Ca_Desig_denovo              | 17292355                       | (C/T)       |
| 42200       | CadSNP17795    | <i>Desi</i>      | Ca_Desig_denovo              | 17293823                       | (T/G)       |
| 42201       | CadSNP17796    | <i>Desi</i>      | Ca_Desig_denovo              | 17296019                       | (T/G)       |
| 42202       | CadSNP17797    | <i>Desi</i>      | Ca_Desig_denovo              | 17303579                       | (A/C)       |
| 42203       | CadSNP17798    | <i>Desi</i>      | Ca_Desig_denovo              | 17303606                       | (C/T)       |
| 42204       | CadSNP17799    | <i>Desi</i>      | Ca_Desig_denovo              | 17305253                       | (G/C)       |
| 42205       | CadSNP17800    | <i>Desi</i>      | Ca_Desig_denovo              | 17308064                       | (G/A)       |
| 42206       | CadSNP17801    | <i>Desi</i>      | Ca_Desig_denovo              | 17308136                       | (C/T)       |
| 42207       | CadSNP17802    | <i>Desi</i>      | Ca_Desig_denovo              | 17314659                       | (C/T)       |
| 42208       | CadSNP17803    | <i>Desi</i>      | Ca_Desig_denovo              | 17316344                       | (A/C)       |
| 42209       | CadSNP17804    | <i>Desi</i>      | Ca_Desig_denovo              | 17324890                       | (C/G)       |
| 42210       | CadSNP17805    | <i>Desi</i>      | Ca_Desig_denovo              | 17324917                       | (T/C)       |
| 42211       | CadSNP17806    | <i>Desi</i>      | Ca_Desig_denovo              | 17325278                       | (C/T)       |
| 42212       | CadSNP17807    | <i>Desi</i>      | Ca_Desig_denovo              | 17325957                       | (T/C)       |
| 42213       | CadSNP17808    | <i>Desi</i>      | Ca_Desig_denovo              | 17338240                       | (C/A)       |
| 42214       | CadSNP17809    | <i>Desi</i>      | Ca_Desig_denovo              | 17338246                       | (T/C)       |
| 42215       | CadSNP17810    | <i>Desi</i>      | Ca_Desig_denovo              | 17340531                       | (G/A)       |
| 42216       | CadSNP17811    | <i>Desi</i>      | Ca_Desig_denovo              | 17340556                       | (C/T)       |
| 42217       | CadSNP17812    | <i>Desi</i>      | Ca_Desig_denovo              | 17341811                       | (C/A)       |

| <b>S.N.</b> | <b>SNP IDs</b> | <b>Cultivars</b> | <b>Chromosomes/scaffolds</b> | <b>Physical positions (bp)</b> | <b>SNPs</b> |
|-------------|----------------|------------------|------------------------------|--------------------------------|-------------|
| 42218       | CadSNP17813    | <i>Desi</i>      | Ca_Desig_denovo              | 17341829                       | (G/A)       |
| 42219       | CadSNP17814    | <i>Desi</i>      | Ca_Desig_denovo              | 17342025                       | (C/A)       |
| 42220       | CadSNP17815    | <i>Desi</i>      | Ca_Desig_denovo              | 17342467                       | (G/A)       |
| 42221       | CadSNP17816    | <i>Desi</i>      | Ca_Desig_denovo              | 17344261                       | (T/A)       |
| 42222       | CadSNP17817    | <i>Desi</i>      | Ca_Desig_denovo              | 17344282                       | (G/C)       |
| 42223       | CadSNP17818    | <i>Desi</i>      | Ca_Desig_denovo              | 17345069                       | (T/C)       |
| 42224       | CadSNP17819    | <i>Desi</i>      | Ca_Desig_denovo              | 17345138                       | (A/T)       |
| 42225       | CadSNP17820    | <i>Desi</i>      | Ca_Desig_denovo              | 17355101                       | (A/C)       |
| 42226       | CadSNP17821    | <i>Desi</i>      | Ca_Desig_denovo              | 17355103                       | (A/G)       |
| 42227       | CadSNP17822    | <i>Desi</i>      | Ca_Desig_denovo              | 17359044                       | (G/A)       |
| 42228       | CadSNP17823    | <i>Desi</i>      | Ca_Desig_denovo              | 17359518                       | (C/A)       |
| 42229       | CadSNP17824    | <i>Desi</i>      | Ca_Desig_denovo              | 17359547                       | (G/A)       |
| 42230       | CadSNP17825    | <i>Desi</i>      | Ca_Desig_denovo              | 17360533                       | (A/G)       |
| 42231       | CadSNP17826    | <i>Desi</i>      | Ca_Desig_denovo              | 17373653                       | (T/C)       |
| 42232       | CadSNP17827    | <i>Desi</i>      | Ca_Desig_denovo              | 17373683                       | (C/T)       |
| 42233       | CadSNP17828    | <i>Desi</i>      | Ca_Desig_denovo              | 17378123                       | (A/G)       |
| 42234       | CadSNP17829    | <i>Desi</i>      | Ca_Desig_denovo              | 17378147                       | (G/T)       |
| 42235       | CadSNP17830    | <i>Desi</i>      | Ca_Desig_denovo              | 17383619                       | (A/G)       |
| 42236       | CadSNP17831    | <i>Desi</i>      | Ca_Desig_denovo              | 17383622                       | (A/G)       |
| 42237       | CadSNP17832    | <i>Desi</i>      | Ca_Desig_denovo              | 17385578                       | (A/C)       |
| 42238       | CadSNP17833    | <i>Desi</i>      | Ca_Desig_denovo              | 17386758                       | (C/T)       |
| 42239       | CadSNP17834    | <i>Desi</i>      | Ca_Desig_denovo              | 17388857                       | (C/G)       |
| 42240       | CadSNP17835    | <i>Desi</i>      | Ca_Desig_denovo              | 17392552                       | (T/A)       |
| 42241       | CadSNP17836    | <i>Desi</i>      | Ca_Desig_denovo              | 17393753                       | (G/C)       |
| 42242       | CadSNP17837    | <i>Desi</i>      | Ca_Desig_denovo              | 17394000                       | (T/C)       |
| 42243       | CadSNP17838    | <i>Desi</i>      | Ca_Desig_denovo              | 17394040                       | (G/A)       |
| 42244       | CadSNP17839    | <i>Desi</i>      | Ca_Desig_denovo              | 17397403                       | (C/T)       |
| 42245       | CadSNP17840    | <i>Desi</i>      | Ca_Desig_denovo              | 17397834                       | (A/G)       |
| 42246       | CadSNP17841    | <i>Desi</i>      | Ca_Desig_denovo              | 17400980                       | (C/T)       |
| 42247       | CadSNP17842    | <i>Desi</i>      | Ca_Desig_denovo              | 17405907                       | (G/T)       |
| 42248       | CadSNP17843    | <i>Desi</i>      | Ca_Desig_denovo              | 17406109                       | (C/T)       |
| 42249       | CadSNP17844    | <i>Desi</i>      | Ca_Desig_denovo              | 17410603                       | (T/G)       |
| 42250       | CadSNP17845    | <i>Desi</i>      | Ca_Desig_denovo              | 17412603                       | (T/C)       |
| 42251       | CadSNP17846    | <i>Desi</i>      | Ca_Desig_denovo              | 17412621                       | (A/G)       |
| 42252       | CadSNP17847    | <i>Desi</i>      | Ca_Desig_denovo              | 17423042                       | (T/C)       |
| 42253       | CadSNP17848    | <i>Desi</i>      | Ca_Desig_denovo              | 17423086                       | (G/C)       |
| 42254       | CadSNP17849    | <i>Desi</i>      | Ca_Desig_denovo              | 17435293                       | (G/A)       |
| 42255       | CadSNP17850    | <i>Desi</i>      | Ca_Desig_denovo              | 17435323                       | (A/C)       |

| <b>S.N.</b> | <b>SNP IDs</b> | <b>Cultivars</b> | <b>Chromosomes/scaffolds</b> | <b>Physical positions (bp)</b> | <b>SNPs</b> |
|-------------|----------------|------------------|------------------------------|--------------------------------|-------------|
| 42256       | CadSNP17851    | <i>Desi</i>      | Ca_Desig_denovo              | 17439937                       | (C/G)       |
| 42257       | CadSNP17852    | <i>Desi</i>      | Ca_Desig_denovo              | 17439940                       | (C/T)       |
| 42258       | CadSNP17853    | <i>Desi</i>      | Ca_Desig_denovo              | 17440990                       | (A/T)       |
| 42259       | CadSNP17854    | <i>Desi</i>      | Ca_Desig_denovo              | 17441035                       | (G/A)       |
| 42260       | CadSNP17855    | <i>Desi</i>      | Ca_Desig_denovo              | 17450630                       | (A/G)       |
| 42261       | CadSNP17856    | <i>Desi</i>      | Ca_Desig_denovo              | 17450657                       | (G/A)       |
| 42262       | CadSNP17857    | <i>Desi</i>      | Ca_Desig_denovo              | 17451853                       | (C/T)       |
| 42263       | CadSNP17858    | <i>Desi</i>      | Ca_Desig_denovo              | 17454380                       | (C/A)       |
| 42264       | CadSNP17859    | <i>Desi</i>      | Ca_Desig_denovo              | 17457464                       | (C/T)       |
| 42265       | CadSNP17860    | <i>Desi</i>      | Ca_Desig_denovo              | 17457467                       | (A/G)       |
| 42266       | CadSNP17861    | <i>Desi</i>      | Ca_Desig_denovo              | 17465140                       | (G/C)       |
| 42267       | CadSNP17862    | <i>Desi</i>      | Ca_Desig_denovo              | 17465152                       | (C/T)       |
| 42268       | CadSNP17863    | <i>Desi</i>      | Ca_Desig_denovo              | 17468504                       | (G/C)       |
| 42269       | CadSNP17864    | <i>Desi</i>      | Ca_Desig_denovo              | 17468531                       | (A/G)       |
| 42270       | CadSNP17865    | <i>Desi</i>      | Ca_Desig_denovo              | 17473136                       | (G/T)       |
| 42271       | CadSNP17866    | <i>Desi</i>      | Ca_Desig_denovo              | 17478442                       | (C/G)       |
| 42272       | CadSNP17867    | <i>Desi</i>      | Ca_Desig_denovo              | 17478487                       | (A/G)       |
| 42273       | CadSNP17868    | <i>Desi</i>      | Ca_Desig_denovo              | 17479579                       | (T/C)       |
| 42274       | CadSNP17869    | <i>Desi</i>      | Ca_Desig_denovo              | 17479588                       | (G/T)       |
| 42275       | CadSNP17870    | <i>Desi</i>      | Ca_Desig_denovo              | 17483414                       | (T/C)       |
| 42276       | CadSNP17871    | <i>Desi</i>      | Ca_Desig_denovo              | 17483441                       | (G/C)       |
| 42277       | CadSNP17872    | <i>Desi</i>      | Ca_Desig_denovo              | 17483928                       | (G/A)       |
| 42278       | CadSNP17873    | <i>Desi</i>      | Ca_Desig_denovo              | 17483937                       | (A/C)       |
| 42279       | CadSNP17874    | <i>Desi</i>      | Ca_Desig_denovo              | 17491915                       | (T/G)       |
| 42280       | CadSNP17875    | <i>Desi</i>      | Ca_Desig_denovo              | 17491921                       | (T/C)       |
| 42281       | CadSNP17876    | <i>Desi</i>      | Ca_Desig_denovo              | 17492391                       | (A/G)       |
| 42282       | CadSNP17877    | <i>Desi</i>      | Ca_Desig_denovo              | 17493999                       | (G/A)       |
| 42283       | CadSNP17878    | <i>Desi</i>      | Ca_Desig_denovo              | 17494017                       | (C/G)       |
| 42284       | CadSNP17879    | <i>Desi</i>      | Ca_Desig_denovo              | 17497225                       | (T/C)       |
| 42285       | CadSNP17880    | <i>Desi</i>      | Ca_Desig_denovo              | 17498983                       | (T/C)       |
| 42286       | CadSNP17881    | <i>Desi</i>      | Ca_Desig_denovo              | 17500010                       | (A/G)       |
| 42287       | CadSNP17882    | <i>Desi</i>      | Ca_Desig_denovo              | 17502617                       | (C/T)       |
| 42288       | CadSNP17883    | <i>Desi</i>      | Ca_Desig_denovo              | 17507419                       | (G/A)       |
| 42289       | CadSNP17884    | <i>Desi</i>      | Ca_Desig_denovo              | 17507488                       | (G/C)       |
| 42290       | CadSNP17885    | <i>Desi</i>      | Ca_Desig_denovo              | 17511537                       | (T/C)       |
| 42291       | CadSNP17886    | <i>Desi</i>      | Ca_Desig_denovo              | 17515259                       | (G/A)       |
| 42292       | CadSNP17887    | <i>Desi</i>      | Ca_Desig_denovo              | 17515833                       | (A/G)       |
| 42293       | CadSNP17888    | <i>Desi</i>      | Ca_Desig_denovo              | 17525764                       | (T/C)       |

| <b>S.N.</b> | <b>SNP IDs</b> | <b>Cultivars</b> | <b>Chromosomes/scaffolds</b> | <b>Physical positions (bp)</b> | <b>SNPs</b> |
|-------------|----------------|------------------|------------------------------|--------------------------------|-------------|
| 42294       | CadSNP17889    | <i>Desi</i>      | Ca_Desig_denovo              | 17535211                       | (G/A)       |
| 42295       | CadSNP17890    | <i>Desi</i>      | Ca_Desig_denovo              | 17537443                       | (T/C)       |
| 42296       | CadSNP17891    | <i>Desi</i>      | Ca_Desig_denovo              | 17548432                       | (C/G)       |
| 42297       | CadSNP17892    | <i>Desi</i>      | Ca_Desig_denovo              | 17548444                       | (C/T)       |
| 42298       | CadSNP17893    | <i>Desi</i>      | Ca_Desig_denovo              | 17548846                       | (G/A)       |
| 42299       | CadSNP17894    | <i>Desi</i>      | Ca_Desig_denovo              | 17551900                       | (T/C)       |
| 42300       | CadSNP17895    | <i>Desi</i>      | Ca_Desig_denovo              | 17551930                       | (C/T)       |
| 42301       | CadSNP17896    | <i>Desi</i>      | Ca_Desig_denovo              | 17570319                       | (C/G)       |
| 42302       | CadSNP17897    | <i>Desi</i>      | Ca_Desig_denovo              | 17572466                       | (T/G)       |
| 42303       | CadSNP17898    | <i>Desi</i>      | Ca_Desig_denovo              | 17573302                       | (T/C)       |
| 42304       | CadSNP17899    | <i>Desi</i>      | Ca_Desig_denovo              | 17573311                       | (A/C)       |
| 42305       | CadSNP17900    | <i>Desi</i>      | Ca_Desig_denovo              | 17574899                       | (A/G)       |
| 42306       | CadSNP17901    | <i>Desi</i>      | Ca_Desig_denovo              | 17574916                       | (T/C)       |
| 42307       | CadSNP17902    | <i>Desi</i>      | Ca_Desig_denovo              | 17577486                       | (A/G)       |
| 42308       | CadSNP17903    | <i>Desi</i>      | Ca_Desig_denovo              | 17577487                       | (T/C)       |
| 42309       | CadSNP17904    | <i>Desi</i>      | Ca_Desig_denovo              | 17578225                       | (A/G)       |
| 42310       | CadSNP17905    | <i>Desi</i>      | Ca_Desig_denovo              | 17589283                       | (G/A)       |
| 42311       | CadSNP17906    | <i>Desi</i>      | Ca_Desig_denovo              | 17589671                       | (G/T)       |
| 42312       | CadSNP17907    | <i>Desi</i>      | Ca_Desig_denovo              | 17589677                       | (T/C)       |
| 42313       | CadSNP17908    | <i>Desi</i>      | Ca_Desig_denovo              | 17592167                       | (A/C)       |
| 42314       | CadSNP17909    | <i>Desi</i>      | Ca_Desig_denovo              | 17592169                       | (T/C)       |
| 42315       | CadSNP17910    | <i>Desi</i>      | Ca_Desig_denovo              | 17598007                       | (A/G)       |
| 42316       | CadSNP17911    | <i>Desi</i>      | Ca_Desig_denovo              | 17598012                       | (G/A)       |
| 42317       | CadSNP17912    | <i>Desi</i>      | Ca_Desig_denovo              | 17599090                       | (G/A)       |
| 42318       | CadSNP17913    | <i>Desi</i>      | Ca_Desig_denovo              | 17600085                       | (A/G)       |
| 42319       | CadSNP17914    | <i>Desi</i>      | Ca_Desig_denovo              | 17602075                       | (G/C)       |
| 42320       | CadSNP17915    | <i>Desi</i>      | Ca_Desig_denovo              | 17602919                       | (C/T)       |
| 42321       | CadSNP17916    | <i>Desi</i>      | Ca_Desig_denovo              | 17606702                       | (T/C)       |
| 42322       | CadSNP17917    | <i>Desi</i>      | Ca_Desig_denovo              | 17606716                       | (G/A)       |
| 42323       | CadSNP17918    | <i>Desi</i>      | Ca_Desig_denovo              | 17615154                       | (G/A)       |
| 42324       | CadSNP17919    | <i>Desi</i>      | Ca_Desig_denovo              | 17619323                       | (G/C)       |
| 42325       | CadSNP17920    | <i>Desi</i>      | Ca_Desig_denovo              | 17619352                       | (T/C)       |
| 42326       | CadSNP17921    | <i>Desi</i>      | Ca_Desig_denovo              | 17620285                       | (G/C)       |
| 42327       | CadSNP17922    | <i>Desi</i>      | Ca_Desig_denovo              | 17620292                       | (G/A)       |
| 42328       | CadSNP17923    | <i>Desi</i>      | Ca_Desig_denovo              | 17630228                       | (T/C)       |
| 42329       | CadSNP17924    | <i>Desi</i>      | Ca_Desig_denovo              | 17630242                       | (G/A)       |
| 42330       | CadSNP17925    | <i>Desi</i>      | Ca_Desig_denovo              | 17635891                       | (G/C)       |
| 42331       | CadSNP17926    | <i>Desi</i>      | Ca_Desig_denovo              | 17635892                       | (C/G)       |

| <b>S.N.</b> | <b>SNP IDs</b> | <b>Cultivars</b> | <b>Chromosomes/scaffolds</b> | <b>Physical positions (bp)</b> | <b>SNPs</b> |
|-------------|----------------|------------------|------------------------------|--------------------------------|-------------|
| 42332       | CadSNP17927    | <i>Desi</i>      | Ca_Desig_denovo              | 17636633                       | (C/G)       |
| 42333       | CadSNP17928    | <i>Desi</i>      | Ca_Desig_denovo              | 17636647                       | (T/C)       |
| 42334       | CadSNP17929    | <i>Desi</i>      | Ca_Desig_denovo              | 17642014                       | (C/T)       |
| 42335       | CadSNP17930    | <i>Desi</i>      | Ca_Desig_denovo              | 17642419                       | (C/T)       |
| 42336       | CadSNP17931    | <i>Desi</i>      | Ca_Desig_denovo              | 17642428                       | (T/C)       |
| 42337       | CadSNP17932    | <i>Desi</i>      | Ca_Desig_denovo              | 17642794                       | (G/A)       |
| 42338       | CadSNP17933    | <i>Desi</i>      | Ca_Desig_denovo              | 17647123                       | (G/T)       |
| 42339       | CadSNP17934    | <i>Desi</i>      | Ca_Desig_denovo              | 17650744                       | (T/C)       |
| 42340       | CadSNP17935    | <i>Desi</i>      | Ca_Desig_denovo              | 17650802                       | (T/C)       |
| 42341       | CadSNP17936    | <i>Desi</i>      | Ca_Desig_denovo              | 17655887                       | (C/A)       |
| 42342       | CadSNP17937    | <i>Desi</i>      | Ca_Desig_denovo              | 17658682                       | (G/A)       |
| 42343       | CadSNP17938    | <i>Desi</i>      | Ca_Desig_denovo              | 17669474                       | (G/A)       |
| 42344       | CadSNP17939    | <i>Desi</i>      | Ca_Desig_denovo              | 17669492                       | (C/A)       |
| 42345       | CadSNP17940    | <i>Desi</i>      | Ca_Desig_denovo              | 17677181                       | (C/G)       |
| 42346       | CadSNP17941    | <i>Desi</i>      | Ca_Desig_denovo              | 17679599                       | (A/C)       |
| 42347       | CadSNP17942    | <i>Desi</i>      | Ca_Desig_denovo              | 17682025                       | (A/G)       |
| 42348       | CadSNP17943    | <i>Desi</i>      | Ca_Desig_denovo              | 17682053                       | (G/A)       |
| 42349       | CadSNP17944    | <i>Desi</i>      | Ca_Desig_denovo              | 17683932                       | (G/C)       |
| 42350       | CadSNP17945    | <i>Desi</i>      | Ca_Desig_denovo              | 17683944                       | (T/C)       |
| 42351       | CadSNP17946    | <i>Desi</i>      | Ca_Desig_denovo              | 17686865                       | (G/T)       |
| 42352       | CadSNP17947    | <i>Desi</i>      | Ca_Desig_denovo              | 17688172                       | (T/C)       |
| 42353       | CadSNP17948    | <i>Desi</i>      | Ca_Desig_denovo              | 17691222                       | (A/G)       |
| 42354       | CadSNP17949    | <i>Desi</i>      | Ca_Desig_denovo              | 17694070                       | (T/G)       |
| 42355       | CadSNP17950    | <i>Desi</i>      | Ca_Desig_denovo              | 17694968                       | (A/G)       |
| 42356       | CadSNP17951    | <i>Desi</i>      | Ca_Desig_denovo              | 17701816                       | (C/T)       |
| 42357       | CadSNP17952    | <i>Desi</i>      | Ca_Desig_denovo              | 17709572                       | (G/C)       |
| 42358       | CadSNP17953    | <i>Desi</i>      | Ca_Desig_denovo              | 17713910                       | (G/A)       |
| 42359       | CadSNP17954    | <i>Desi</i>      | Ca_Desig_denovo              | 17713919                       | (T/C)       |
| 42360       | CadSNP17955    | <i>Desi</i>      | Ca_Desig_denovo              | 17725187                       | (C/T)       |
| 42361       | CadSNP17956    | <i>Desi</i>      | Ca_Desig_denovo              | 17727961                       | (A/C)       |
| 42362       | CadSNP17957    | <i>Desi</i>      | Ca_Desig_denovo              | 17727964                       | (G/A)       |
| 42363       | CadSNP17958    | <i>Desi</i>      | Ca_Desig_denovo              | 17728055                       | (A/G)       |
| 42364       | CadSNP17959    | <i>Desi</i>      | Ca_Desig_denovo              | 17730959                       | (A/G)       |
| 42365       | CadSNP17960    | <i>Desi</i>      | Ca_Desig_denovo              | 17734078                       | (A/C)       |
| 42366       | CadSNP17961    | <i>Desi</i>      | Ca_Desig_denovo              | 17740073                       | (C/T)       |
| 42367       | CadSNP17962    | <i>Desi</i>      | Ca_Desig_denovo              | 17740083                       | (A/C)       |
| 42368       | CadSNP17963    | <i>Desi</i>      | Ca_Desig_denovo              | 17740235                       | (C/G)       |
| 42369       | CadSNP17964    | <i>Desi</i>      | Ca_Desig_denovo              | 17745048                       | (T/C)       |

| <b>S.N.</b> | <b>SNP IDs</b> | <b>Cultivars</b> | <b>Chromosomes/scaffolds</b> | <b>Physical positions (bp)</b> | <b>SNPs</b> |
|-------------|----------------|------------------|------------------------------|--------------------------------|-------------|
| 42370       | CadSNP17965    | <i>Desi</i>      | Ca_Desig_denovo              | 17754864                       | (C/A)       |
| 42371       | CadSNP17966    | <i>Desi</i>      | Ca_Desig_denovo              | 17758046                       | (T/A)       |
| 42372       | CadSNP17967    | <i>Desi</i>      | Ca_Desig_denovo              | 17758732                       | (C/G)       |
| 42373       | CadSNP17968    | <i>Desi</i>      | Ca_Desig_denovo              | 17758816                       | (G/T)       |
| 42374       | CadSNP17969    | <i>Desi</i>      | Ca_Desig_denovo              | 17759008                       | (T/C)       |
| 42375       | CadSNP17970    | <i>Desi</i>      | Ca_Desig_denovo              | 17760832                       | (A/G)       |
| 42376       | CadSNP17971    | <i>Desi</i>      | Ca_Desig_denovo              | 17767029                       | (C/G)       |
| 42377       | CadSNP17972    | <i>Desi</i>      | Ca_Desig_denovo              | 17773249                       | (C/A)       |
| 42378       | CadSNP17973    | <i>Desi</i>      | Ca_Desig_denovo              | 17773994                       | (C/T)       |
| 42379       | CadSNP17974    | <i>Desi</i>      | Ca_Desig_denovo              | 17774032                       | (G/A)       |
| 42380       | CadSNP17975    | <i>Desi</i>      | Ca_Desig_denovo              | 17774635                       | (G/A)       |
| 42381       | CadSNP17976    | <i>Desi</i>      | Ca_Desig_denovo              | 17778638                       | (G/A)       |
| 42382       | CadSNP17977    | <i>Desi</i>      | Ca_Desig_denovo              | 17778686                       | (C/T)       |
| 42383       | CadSNP17978    | <i>Desi</i>      | Ca_Desig_denovo              | 17782674                       | (T/C)       |
| 42384       | CadSNP17979    | <i>Desi</i>      | Ca_Desig_denovo              | 17782679                       | (T/C)       |
| 42385       | CadSNP17980    | <i>Desi</i>      | Ca_Desig_denovo              | 17783914                       | (C/T)       |
| 42386       | CadSNP17981    | <i>Desi</i>      | Ca_Desig_denovo              | 17783917                       | (T/C)       |
| 42387       | CadSNP17982    | <i>Desi</i>      | Ca_Desig_denovo              | 17787875                       | (G/A)       |
| 42388       | CadSNP17983    | <i>Desi</i>      | Ca_Desig_denovo              | 17800802                       | (C/T)       |
| 42389       | CadSNP17984    | <i>Desi</i>      | Ca_Desig_denovo              | 17806251                       | (G/T)       |
| 42390       | CadSNP17985    | <i>Desi</i>      | Ca_Desig_denovo              | 17811203                       | (A/G)       |
| 42391       | CadSNP17986    | <i>Desi</i>      | Ca_Desig_denovo              | 17811234                       | (A/C)       |
| 42392       | CadSNP17987    | <i>Desi</i>      | Ca_Desig_denovo              | 17815593                       | (C/T)       |
| 42393       | CadSNP17988    | <i>Desi</i>      | Ca_Desig_denovo              | 17815620                       | (T/C)       |
| 42394       | CadSNP17989    | <i>Desi</i>      | Ca_Desig_denovo              | 17816518                       | (T/C)       |
| 42395       | CadSNP17990    | <i>Desi</i>      | Ca_Desig_denovo              | 17816882                       | (G/T)       |
| 42396       | CadSNP17991    | <i>Desi</i>      | Ca_Desig_denovo              | 17820417                       | (C/T)       |
| 42397       | CadSNP17992    | <i>Desi</i>      | Ca_Desig_denovo              | 17826876                       | (A/G)       |
| 42398       | CadSNP17993    | <i>Desi</i>      | Ca_Desig_denovo              | 17828051                       | (G/C)       |
| 42399       | CadSNP17994    | <i>Desi</i>      | Ca_Desig_denovo              | 17828100                       | (G/A)       |
| 42400       | CadSNP17995    | <i>Desi</i>      | Ca_Desig_denovo              | 17830933                       | (T/C)       |
| 42401       | CadSNP17996    | <i>Desi</i>      | Ca_Desig_denovo              | 17834740                       | (A/G)       |
| 42402       | CadSNP17997    | <i>Desi</i>      | Ca_Desig_denovo              | 17834764                       | (G/C)       |
| 42403       | CadSNP17998    | <i>Desi</i>      | Ca_Desig_denovo              | 17835696                       | (T/C)       |
| 42404       | CadSNP17999    | <i>Desi</i>      | Ca_Desig_denovo              | 17835705                       | (T/C)       |
| 42405       | CadSNP18000    | <i>Desi</i>      | Ca_Desig_denovo              | 17837597                       | (G/A)       |
| 42406       | CadSNP18001    | <i>Desi</i>      | Ca_Desig_denovo              | 17847204                       | (A/G)       |
| 42407       | CadSNP18002    | <i>Desi</i>      | Ca_Desig_denovo              | 17849422                       | (G/A)       |

| <b>S.N.</b> | <b>SNP IDs</b> | <b>Cultivars</b> | <b>Chromosomes/scaffolds</b> | <b>Physical positions (bp)</b> | <b>SNPs</b> |
|-------------|----------------|------------------|------------------------------|--------------------------------|-------------|
| 42408       | CadSNP18003    | <i>Desi</i>      | Ca_Desig_denovo              | 17850441                       | (C/G)       |
| 42409       | CadSNP18004    | <i>Desi</i>      | Ca_Desig_denovo              | 17850459                       | (C/T)       |
| 42410       | CadSNP18005    | <i>Desi</i>      | Ca_Desig_denovo              | 17851388                       | (G/A)       |
| 42411       | CadSNP18006    | <i>Desi</i>      | Ca_Desig_denovo              | 17853995                       | (A/G)       |
| 42412       | CadSNP18007    | <i>Desi</i>      | Ca_Desig_denovo              | 17855183                       | (T/A)       |
| 42413       | CadSNP18008    | <i>Desi</i>      | Ca_Desig_denovo              | 17855237                       | (G/A)       |
| 42414       | CadSNP18009    | <i>Desi</i>      | Ca_Desig_denovo              | 17860011                       | (C/T)       |
| 42415       | CadSNP18010    | <i>Desi</i>      | Ca_Desig_denovo              | 17860043                       | (A/G)       |
| 42416       | CadSNP18011    | <i>Desi</i>      | Ca_Desig_denovo              | 17860715                       | (A/G)       |
| 42417       | CadSNP18012    | <i>Desi</i>      | Ca_Desig_denovo              | 17861522                       | (G/A)       |
| 42418       | CadSNP18013    | <i>Desi</i>      | Ca_Desig_denovo              | 17861543                       | (G/A)       |
| 42419       | CadSNP18014    | <i>Desi</i>      | Ca_Desig_denovo              | 17865462                       | (G/A)       |
| 42420       | CadSNP18015    | <i>Desi</i>      | Ca_Desig_denovo              | 17866984                       | (C/T)       |
| 42421       | CadSNP18016    | <i>Desi</i>      | Ca_Desig_denovo              | 17867053                       | (A/C)       |
| 42422       | CadSNP18017    | <i>Desi</i>      | Ca_Desig_denovo              | 17872307                       | (G/A)       |
| 42423       | CadSNP18018    | <i>Desi</i>      | Ca_Desig_denovo              | 17872335                       | (C/T)       |
| 42424       | CadSNP18019    | <i>Desi</i>      | Ca_Desig_denovo              | 17883244                       | (T/C)       |
| 42425       | CadSNP18020    | <i>Desi</i>      | Ca_Desig_denovo              | 17884310                       | (A/G)       |
| 42426       | CadSNP18021    | <i>Desi</i>      | Ca_Desig_denovo              | 17885155                       | (T/G)       |
| 42427       | CadSNP18022    | <i>Desi</i>      | Ca_Desig_denovo              | 17893067                       | (A/C)       |
| 42428       | CadSNP18023    | <i>Desi</i>      | Ca_Desig_denovo              | 17896116                       | (A/G)       |
| 42429       | CadSNP18024    | <i>Desi</i>      | Ca_Desig_denovo              | 17900781                       | (T/C)       |
| 42430       | CadSNP18025    | <i>Desi</i>      | Ca_Desig_denovo              | 17907941                       | (T/C)       |
| 42431       | CadSNP18026    | <i>Desi</i>      | Ca_Desig_denovo              | 17910936                       | (C/T)       |
| 42432       | CadSNP18027    | <i>Desi</i>      | Ca_Desig_denovo              | 17915122                       | (C/T)       |
| 42433       | CadSNP18028    | <i>Desi</i>      | Ca_Desig_denovo              | 17915555                       | (G/A)       |
| 42434       | CadSNP18029    | <i>Desi</i>      | Ca_Desig_denovo              | 17917387                       | (G/T)       |
| 42435       | CadSNP18030    | <i>Desi</i>      | Ca_Desig_denovo              | 17917456                       | (G/A)       |
| 42436       | CadSNP18031    | <i>Desi</i>      | Ca_Desig_denovo              | 17917690                       | (T/C)       |
| 42437       | CadSNP18032    | <i>Desi</i>      | Ca_Desig_denovo              | 17917699                       | (T/C)       |
| 42438       | CadSNP18033    | <i>Desi</i>      | Ca_Desig_denovo              | 17925400                       | (G/A)       |
| 42439       | CadSNP18034    | <i>Desi</i>      | Ca_Desig_denovo              | 17925448                       | (T/C)       |
| 42440       | CadSNP18035    | <i>Desi</i>      | Ca_Desig_denovo              | 17931006                       | (A/G)       |
| 42441       | CadSNP18036    | <i>Desi</i>      | Ca_Desig_denovo              | 17933504                       | (G/C)       |
| 42442       | CadSNP18037    | <i>Desi</i>      | Ca_Desig_denovo              | 17933513                       | (A/G)       |
| 42443       | CadSNP18038    | <i>Desi</i>      | Ca_Desig_denovo              | 17935132                       | (T/G)       |
| 42444       | CadSNP18039    | <i>Desi</i>      | Ca_Desig_denovo              | 17935829                       | (A/G)       |
| 42445       | CadSNP18040    | <i>Desi</i>      | Ca_Desig_denovo              | 17935886                       | (G/A)       |

| <b>S.N.</b> | <b>SNP IDs</b> | <b>Cultivars</b> | <b>Chromosomes/scaffolds</b> | <b>Physical positions (bp)</b> | <b>SNPs</b> |
|-------------|----------------|------------------|------------------------------|--------------------------------|-------------|
| 42446       | CadSNP18041    | <i>Desi</i>      | Ca_Desig_denovo              | 17939155                       | (T/A)       |
| 42447       | CadSNP18042    | <i>Desi</i>      | Ca_Desig_denovo              | 17941845                       | (A/C)       |
| 42448       | CadSNP18043    | <i>Desi</i>      | Ca_Desig_denovo              | 17941902                       | (T/C)       |
| 42449       | CadSNP18044    | <i>Desi</i>      | Ca_Desig_denovo              | 17946251                       | (T/C)       |
| 42450       | CadSNP18045    | <i>Desi</i>      | Ca_Desig_denovo              | 17949744                       | (A/C)       |
| 42451       | CadSNP18046    | <i>Desi</i>      | Ca_Desig_denovo              | 17952595                       | (T/C)       |
| 42452       | CadSNP18047    | <i>Desi</i>      | Ca_Desig_denovo              | 17954543                       | (T/C)       |
| 42453       | CadSNP18048    | <i>Desi</i>      | Ca_Desig_denovo              | 17954567                       | (T/G)       |
| 42454       | CadSNP18049    | <i>Desi</i>      | Ca_Desig_denovo              | 17955683                       | (T/G)       |
| 42455       | CadSNP18050    | <i>Desi</i>      | Ca_Desig_denovo              | 17958062                       | (C/T)       |
| 42456       | CadSNP18051    | <i>Desi</i>      | Ca_Desig_denovo              | 17958079                       | (A/G)       |
| 42457       | CadSNP18052    | <i>Desi</i>      | Ca_Desig_denovo              | 17958967                       | (G/C)       |
| 42458       | CadSNP18053    | <i>Desi</i>      | Ca_Desig_denovo              | 17962269                       | (G/C)       |
| 42459       | CadSNP18054    | <i>Desi</i>      | Ca_Desig_denovo              | 17962278                       | (A/G)       |
| 42460       | CadSNP18055    | <i>Desi</i>      | Ca_Desig_denovo              | 17964001                       | (T/C)       |
| 42461       | CadSNP18056    | <i>Desi</i>      | Ca_Desig_denovo              | 17968270                       | (G/T)       |
| 42462       | CadSNP18057    | <i>Desi</i>      | Ca_Desig_denovo              | 17971971                       | (A/C)       |
| 42463       | CadSNP18058    | <i>Desi</i>      | Ca_Desig_denovo              | 17972634                       | (G/A)       |
| 42464       | CadSNP18059    | <i>Desi</i>      | Ca_Desig_denovo              | 17976205                       | (T/C)       |
| 42465       | CadSNP18060    | <i>Desi</i>      | Ca_Desig_denovo              | 17976235                       | (T/G)       |
| 42466       | CadSNP18061    | <i>Desi</i>      | Ca_Desig_denovo              | 17977131                       | (G/C)       |
| 42467       | CadSNP18062    | <i>Desi</i>      | Ca_Desig_denovo              | 17982191                       | (A/G)       |
| 42468       | CadSNP18063    | <i>Desi</i>      | Ca_Desig_denovo              | 17982194                       | (C/G)       |
| 42469       | CadSNP18064    | <i>Desi</i>      | Ca_Desig_denovo              | 17988692                       | (G/C)       |
| 42470       | CadSNP18065    | <i>Desi</i>      | Ca_Desig_denovo              | 17993812                       | (A/G)       |
| 42471       | CadSNP18066    | <i>Desi</i>      | Ca_Desig_denovo              | 17997904                       | (G/C)       |
| 42472       | CadSNP18067    | <i>Desi</i>      | Ca_Desig_denovo              | 17998318                       | (A/T)       |
| 42473       | CadSNP18068    | <i>Desi</i>      | Ca_Desig_denovo              | 18001097                       | (T/C)       |
| 42474       | CadSNP18069    | <i>Desi</i>      | Ca_Desig_denovo              | 18011904                       | (T/G)       |
| 42475       | CadSNP18070    | <i>Desi</i>      | Ca_Desig_denovo              | 18011919                       | (T/G)       |
| 42476       | CadSNP18071    | <i>Desi</i>      | Ca_Desig_denovo              | 18014758                       | (T/G)       |
| 42477       | CadSNP18072    | <i>Desi</i>      | Ca_Desig_denovo              | 18014822                       | (T/C)       |
| 42478       | CadSNP18073    | <i>Desi</i>      | Ca_Desig_denovo              | 18015541                       | (T/C)       |
| 42479       | CadSNP18074    | <i>Desi</i>      | Ca_Desig_denovo              | 18017454                       | (A/G)       |
| 42480       | CadSNP18075    | <i>Desi</i>      | Ca_Desig_denovo              | 18027230                       | (C/G)       |
| 42481       | CadSNP18076    | <i>Desi</i>      | Ca_Desig_denovo              | 18027263                       | (T/C)       |
| 42482       | CadSNP18077    | <i>Desi</i>      | Ca_Desig_denovo              | 18032313                       | (G/T)       |
| 42483       | CadSNP18078    | <i>Desi</i>      | Ca_Desig_denovo              | 18032502                       | (T/G)       |



| <b>S.N.</b> | <b>SNP IDs</b> | <b>Cultivars</b> | <b>Chromosomes/scaffolds</b> | <b>Physical positions (bp)</b> | <b>SNPs</b> |
|-------------|----------------|------------------|------------------------------|--------------------------------|-------------|
| 42484       | CadSNP18079    | <i>Desi</i>      | Ca_Desig_denovo              | 18034994                       | (T/C)       |
| 42485       | CadSNP18080    | <i>Desi</i>      | Ca_Desig_denovo              | 18036933                       | (T/G)       |
| 42486       | CadSNP18081    | <i>Desi</i>      | Ca_Desig_denovo              | 18036961                       | (T/C)       |
| 42487       | CadSNP18082    | <i>Desi</i>      | Ca_Desig_denovo              | 18037391                       | (C/T)       |
| 42488       | CadSNP18083    | <i>Desi</i>      | Ca_Desig_denovo              | 18048383                       | (T/G)       |
| 42489       | CadSNP18084    | <i>Desi</i>      | Ca_Desig_denovo              | 18052742                       | (G/A)       |
| 42490       | CadSNP18085    | <i>Desi</i>      | Ca_Desig_denovo              | 18052745                       | (A/G)       |
| 42491       | CadSNP18086    | <i>Desi</i>      | Ca_Desig_denovo              | 18052807                       | (G/A)       |
| 42492       | CadSNP18087    | <i>Desi</i>      | Ca_Desig_denovo              | 18052811                       | (A/C)       |
| 42493       | CadSNP18088    | <i>Desi</i>      | Ca_Desig_denovo              | 18057718                       | (A/C)       |
| 42494       | CadSNP18089    | <i>Desi</i>      | Ca_Desig_denovo              | 18064985                       | (T/C)       |
| 42495       | CadSNP18090    | <i>Desi</i>      | Ca_Desig_denovo              | 18064989                       | (C/T)       |
| 42496       | CadSNP18091    | <i>Desi</i>      | Ca_Desig_denovo              | 18068367                       | (G/T)       |
| 42497       | CadSNP18092    | <i>Desi</i>      | Ca_Desig_denovo              | 18076898                       | (A/G)       |
| 42498       | CadSNP18093    | <i>Desi</i>      | Ca_Desig_denovo              | 18084138                       | (A/C)       |
| 42499       | CadSNP18094    | <i>Desi</i>      | Ca_Desig_denovo              | 18085930                       | (C/T)       |
| 42500       | CadSNP18095    | <i>Desi</i>      | Ca_Desig_denovo              | 18085948                       | (C/T)       |
| 42501       | CadSNP18096    | <i>Desi</i>      | Ca_Desig_denovo              | 18088831                       | (T/C)       |
| 42502       | CadSNP18097    | <i>Desi</i>      | Ca_Desig_denovo              | 18097252                       | (C/G)       |
| 42503       | CadSNP18098    | <i>Desi</i>      | Ca_Desig_denovo              | 18097279                       | (T/C)       |
| 42504       | CadSNP18099    | <i>Desi</i>      | Ca_Desig_denovo              | 18100596                       | (G/A)       |
| 42505       | CadSNP18100    | <i>Desi</i>      | Ca_Desig_denovo              | 18104144                       | (G/C)       |
| 42506       | CadSNP18101    | <i>Desi</i>      | Ca_Desig_denovo              | 18111433                       | (A/G)       |
| 42507       | CadSNP18102    | <i>Desi</i>      | Ca_Desig_denovo              | 18113344                       | (T/C)       |
| 42508       | CadSNP18103    | <i>Desi</i>      | Ca_Desig_denovo              | 18118288                       | (T/C)       |
| 42509       | CadSNP18104    | <i>Desi</i>      | Ca_Desig_denovo              | 18118336                       | (T/C)       |
| 42510       | CadSNP18105    | <i>Desi</i>      | Ca_Desig_denovo              | 18118854                       | (C/T)       |
| 42511       | CadSNP18106    | <i>Desi</i>      | Ca_Desig_denovo              | 18118855                       | (T/C)       |
| 42512       | CadSNP18107    | <i>Desi</i>      | Ca_Desig_denovo              | 18128863                       | (A/G)       |
| 42513       | CadSNP18108    | <i>Desi</i>      | Ca_Desig_denovo              | 18128966                       | (G/A)       |
| 42514       | CadSNP18109    | <i>Desi</i>      | Ca_Desig_denovo              | 18128971                       | (C/G)       |
| 42515       | CadSNP18110    | <i>Desi</i>      | Ca_Desig_denovo              | 18139687                       | (A/G)       |
| 42516       | CadSNP18111    | <i>Desi</i>      | Ca_Desig_denovo              | 18142172                       | (G/T)       |
| 42517       | CadSNP18112    | <i>Desi</i>      | Ca_Desig_denovo              | 18142858                       | (C/G)       |
| 42518       | CadSNP18113    | <i>Desi</i>      | Ca_Desig_denovo              | 18142991                       | (A/T)       |
| 42519       | CadSNP18114    | <i>Desi</i>      | Ca_Desig_denovo              | 18148550                       | (T/G)       |
| 42520       | CadSNP18115    | <i>Desi</i>      | Ca_Desig_denovo              | 18149161                       | (A/G)       |
| 42521       | CadSNP18116    | <i>Desi</i>      | Ca_Desig_denovo              | 18149203                       | (C/T)       |

| <b>S.N.</b> | <b>SNP IDs</b> | <b>Cultivars</b> | <b>Chromosomes/scaffolds</b> | <b>Physical positions (bp)</b> | <b>SNPs</b> |
|-------------|----------------|------------------|------------------------------|--------------------------------|-------------|
| 42522       | CadSNP18117    | <i>Desi</i>      | Ca_Desig_denovo              | 18154436                       | (A/C)       |
| 42523       | CadSNP18118    | <i>Desi</i>      | Ca_Desig_denovo              | 18156420                       | (C/G)       |
| 42524       | CadSNP18119    | <i>Desi</i>      | Ca_Desig_denovo              | 18156484                       | (T/A)       |
| 42525       | CadSNP18120    | <i>Desi</i>      | Ca_Desig_denovo              | 18158074                       | (A/C)       |
| 42526       | CadSNP18121    | <i>Desi</i>      | Ca_Desig_denovo              | 18158660                       | (A/G)       |
| 42527       | CadSNP18122    | <i>Desi</i>      | Ca_Desig_denovo              | 18158696                       | (A/G)       |
| 42528       | CadSNP18123    | <i>Desi</i>      | Ca_Desig_denovo              | 18160768                       | (G/A)       |
| 42529       | CadSNP18124    | <i>Desi</i>      | Ca_Desig_denovo              | 18160773                       | (G/C)       |
| 42530       | CadSNP18125    | <i>Desi</i>      | Ca_Desig_denovo              | 18161899                       | (G/A)       |
| 42531       | CadSNP18126    | <i>Desi</i>      | Ca_Desig_denovo              | 18161967                       | (T/G)       |
| 42532       | CadSNP18127    | <i>Desi</i>      | Ca_Desig_denovo              | 18161968                       | (G/T)       |
| 42533       | CadSNP18128    | <i>Desi</i>      | Ca_Desig_denovo              | 18164957                       | (T/C)       |
| 42534       | CadSNP18129    | <i>Desi</i>      | Ca_Desig_denovo              | 18169709                       | (C/G)       |
| 42535       | CadSNP18130    | <i>Desi</i>      | Ca_Desig_denovo              | 18171560                       | (C/T)       |
| 42536       | CadSNP18131    | <i>Desi</i>      | Ca_Desig_denovo              | 18193612                       | (C/T)       |
| 42537       | CadSNP18132    | <i>Desi</i>      | Ca_Desig_denovo              | 18193639                       | (C/T)       |
| 42538       | CadSNP18133    | <i>Desi</i>      | Ca_Desig_denovo              | 18198218                       | (G/T)       |
| 42539       | CadSNP18134    | <i>Desi</i>      | Ca_Desig_denovo              | 18199483                       | (T/C)       |
| 42540       | CadSNP18135    | <i>Desi</i>      | Ca_Desig_denovo              | 18203302                       | (G/C)       |
| 42541       | CadSNP18136    | <i>Desi</i>      | Ca_Desig_denovo              | 18203829                       | (G/A)       |
| 42542       | CadSNP18137    | <i>Desi</i>      | Ca_Desig_denovo              | 18212173                       | (C/G)       |
| 42543       | CadSNP18138    | <i>Desi</i>      | Ca_Desig_denovo              | 18212179                       | (C/T)       |
| 42544       | CadSNP18139    | <i>Desi</i>      | Ca_Desig_denovo              | 18216232                       | (T/C)       |
| 42545       | CadSNP18140    | <i>Desi</i>      | Ca_Desig_denovo              | 18216252                       | (G/C)       |
| 42546       | CadSNP18141    | <i>Desi</i>      | Ca_Desig_denovo              | 18216630                       | (T/C)       |
| 42547       | CadSNP18142    | <i>Desi</i>      | Ca_Desig_denovo              | 18216640                       | (A/G)       |
| 42548       | CadSNP18143    | <i>Desi</i>      | Ca_Desig_denovo              | 18222380                       | (G/C)       |
| 42549       | CadSNP18144    | <i>Desi</i>      | Ca_Desig_denovo              | 18235645                       | (C/G)       |
| 42550       | CadSNP18145    | <i>Desi</i>      | Ca_Desig_denovo              | 18235657                       | (G/C)       |
| 42551       | CadSNP18146    | <i>Desi</i>      | Ca_Desig_denovo              | 18243179                       | (C/A)       |
| 42552       | CadSNP18147    | <i>Desi</i>      | Ca_Desig_denovo              | 18243227                       | (A/G)       |
| 42553       | CadSNP18148    | <i>Desi</i>      | Ca_Desig_denovo              | 18244169                       | (G/C)       |
| 42554       | CadSNP18149    | <i>Desi</i>      | Ca_Desig_denovo              | 18244925                       | (A/C)       |
| 42555       | CadSNP18150    | <i>Desi</i>      | Ca_Desig_denovo              | 18248345                       | (G/C)       |
| 42556       | CadSNP18151    | <i>Desi</i>      | Ca_Desig_denovo              | 18251200                       | (G/A)       |
| 42557       | CadSNP18152    | <i>Desi</i>      | Ca_Desig_denovo              | 18251821                       | (C/T)       |
| 42558       | CadSNP18153    | <i>Desi</i>      | Ca_Desig_denovo              | 18273155                       | (G/T)       |
| 42559       | CadSNP18154    | <i>Desi</i>      | Ca_Desig_denovo              | 18273526                       | (C/T)       |

| <b>S.N.</b> | <b>SNP IDs</b> | <b>Cultivars</b> | <b>Chromosomes/scaffolds</b> | <b>Physical positions (bp)</b> | <b>SNPs</b> |
|-------------|----------------|------------------|------------------------------|--------------------------------|-------------|
| 42560       | CadSNP18155    | <i>Desi</i>      | Ca_Desig_denovo              | 18281540                       | (C/T)       |
| 42561       | CadSNP18156    | <i>Desi</i>      | Ca_Desig_denovo              | 18281546                       | (C/T)       |
| 42562       | CadSNP18157    | <i>Desi</i>      | Ca_Desig_denovo              | 18285923                       | (G/A)       |
| 42563       | CadSNP18158    | <i>Desi</i>      | Ca_Desig_denovo              | 18290489                       | (C/T)       |
| 42564       | CadSNP18159    | <i>Desi</i>      | Ca_Desig_denovo              | 18291705                       | (A/C)       |
| 42565       | CadSNP18160    | <i>Desi</i>      | Ca_Desig_denovo              | 18295180                       | (T/C)       |
| 42566       | CadSNP18161    | <i>Desi</i>      | Ca_Desig_denovo              | 18296427                       | (A/G)       |
| 42567       | CadSNP18162    | <i>Desi</i>      | Ca_Desig_denovo              | 18299488                       | (G/A)       |
| 42568       | CadSNP18163    | <i>Desi</i>      | Ca_Desig_denovo              | 18301934                       | (A/C)       |
| 42569       | CadSNP18164    | <i>Desi</i>      | Ca_Desig_denovo              | 18302119                       | (T/G)       |
| 42570       | CadSNP18165    | <i>Desi</i>      | Ca_Desig_denovo              | 18303844                       | (A/C)       |
| 42571       | CadSNP18166    | <i>Desi</i>      | Ca_Desig_denovo              | 18306700                       | (C/T)       |
| 42572       | CadSNP18167    | <i>Desi</i>      | Ca_Desig_denovo              | 18306842                       | (C/A)       |
| 42573       | CadSNP18168    | <i>Desi</i>      | Ca_Desig_denovo              | 18307209                       | (T/G)       |
| 42574       | CadSNP18169    | <i>Desi</i>      | Ca_Desig_denovo              | 18307228                       | (T/C)       |
| 42575       | CadSNP18170    | <i>Desi</i>      | Ca_Desig_denovo              | 18307562                       | (T/C)       |
| 42576       | CadSNP18171    | <i>Desi</i>      | Ca_Desig_denovo              | 18313130                       | (C/G)       |
| 42577       | CadSNP18172    | <i>Desi</i>      | Ca_Desig_denovo              | 18314039                       | (C/G)       |
| 42578       | CadSNP18173    | <i>Desi</i>      | Ca_Desig_denovo              | 18315383                       | (C/T)       |
| 42579       | CadSNP18174    | <i>Desi</i>      | Ca_Desig_denovo              | 18317360                       | (T/G)       |
| 42580       | CadSNP18175    | <i>Desi</i>      | Ca_Desig_denovo              | 18319756                       | (A/G)       |
| 42581       | CadSNP18176    | <i>Desi</i>      | Ca_Desig_denovo              | 18319757                       | (A/G)       |
| 42582       | CadSNP18177    | <i>Desi</i>      | Ca_Desig_denovo              | 18321843                       | (G/A)       |
| 42583       | CadSNP18178    | <i>Desi</i>      | Ca_Desig_denovo              | 18325936                       | (G/C)       |
| 42584       | CadSNP18179    | <i>Desi</i>      | Ca_Desig_denovo              | 18333572                       | (A/G)       |
| 42585       | CadSNP18180    | <i>Desi</i>      | Ca_Desig_denovo              | 18334361                       | (T/C)       |
| 42586       | CadSNP18181    | <i>Desi</i>      | Ca_Desig_denovo              | 18336260                       | (A/C)       |
| 42587       | CadSNP18182    | <i>Desi</i>      | Ca_Desig_denovo              | 18341656                       | (C/A)       |
| 42588       | CadSNP18183    | <i>Desi</i>      | Ca_Desig_denovo              | 18349286                       | (A/G)       |
| 42589       | CadSNP18184    | <i>Desi</i>      | Ca_Desig_denovo              | 18349292                       | (A/C)       |
| 42590       | CadSNP18185    | <i>Desi</i>      | Ca_Desig_denovo              | 18350050                       | (G/A)       |
| 42591       | CadSNP18186    | <i>Desi</i>      | Ca_Desig_denovo              | 18356381                       | (T/G)       |
| 42592       | CadSNP18187    | <i>Desi</i>      | Ca_Desig_denovo              | 18368917                       | (T/C)       |
| 42593       | CadSNP18188    | <i>Desi</i>      | Ca_Desig_denovo              | 18374646                       | (C/A)       |
| 42594       | CadSNP18189    | <i>Desi</i>      | Ca_Desig_denovo              | 18377352                       | (C/T)       |
| 42595       | CadSNP18190    | <i>Desi</i>      | Ca_Desig_denovo              | 18380368                       | (G/A)       |
| 42596       | CadSNP18191    | <i>Desi</i>      | Ca_Desig_denovo              | 18380373                       | (G/A)       |
| 42597       | CadSNP18192    | <i>Desi</i>      | Ca_Desig_denovo              | 18383773                       | (A/C)       |

| <b>S.N.</b> | <b>SNP IDs</b> | <b>Cultivars</b> | <b>Chromosomes/scaffolds</b> | <b>Physical positions (bp)</b> | <b>SNPs</b> |
|-------------|----------------|------------------|------------------------------|--------------------------------|-------------|
| 42598       | CadSNP18193    | <i>Desi</i>      | Ca_Desig_denovo              | 18387183                       | (C/T)       |
| 42599       | CadSNP18194    | <i>Desi</i>      | Ca_Desig_denovo              | 18387215                       | (A/G)       |
| 42600       | CadSNP18195    | <i>Desi</i>      | Ca_Desig_denovo              | 18387933                       | (G/A)       |
| 42601       | CadSNP18196    | <i>Desi</i>      | Ca_Desig_denovo              | 18387939                       | (A/C)       |
| 42602       | CadSNP18197    | <i>Desi</i>      | Ca_Desig_denovo              | 18396563                       | (T/C)       |
| 42603       | CadSNP18198    | <i>Desi</i>      | Ca_Desig_denovo              | 18398376                       | (T/G)       |
| 42604       | CadSNP18199    | <i>Desi</i>      | Ca_Desig_denovo              | 18407871                       | (T/C)       |
| 42605       | CadSNP18200    | <i>Desi</i>      | Ca_Desig_denovo              | 18415657                       | (G/A)       |
| 42606       | CadSNP18201    | <i>Desi</i>      | Ca_Desig_denovo              | 18417088                       | (C/A)       |
| 42607       | CadSNP18202    | <i>Desi</i>      | Ca_Desig_denovo              | 18417133                       | (C/T)       |
| 42608       | CadSNP18203    | <i>Desi</i>      | Ca_Desig_denovo              | 18418278                       | (A/C)       |
| 42609       | CadSNP18204    | <i>Desi</i>      | Ca_Desig_denovo              | 18433550                       | (G/A)       |
| 42610       | CadSNP18205    | <i>Desi</i>      | Ca_Desig_denovo              | 18433580                       | (G/A)       |
| 42611       | CadSNP18206    | <i>Desi</i>      | Ca_Desig_denovo              | 18433786                       | (T/G)       |
| 42612       | CadSNP18207    | <i>Desi</i>      | Ca_Desig_denovo              | 18433794                       | (T/C)       |
| 42613       | CadSNP18208    | <i>Desi</i>      | Ca_Desig_denovo              | 18437311                       | (G/A)       |
| 42614       | CadSNP18209    | <i>Desi</i>      | Ca_Desig_denovo              | 18452161                       | (G/C)       |
| 42615       | CadSNP18210    | <i>Desi</i>      | Ca_Desig_denovo              | 18457459                       | (G/C)       |
| 42616       | CadSNP18211    | <i>Desi</i>      | Ca_Desig_denovo              | 18457486                       | (T/C)       |
| 42617       | CadSNP18212    | <i>Desi</i>      | Ca_Desig_denovo              | 18458521                       | (G/C)       |
| 42618       | CadSNP18213    | <i>Desi</i>      | Ca_Desig_denovo              | 18459327                       | (T/C)       |
| 42619       | CadSNP18214    | <i>Desi</i>      | Ca_Desig_denovo              | 18459366                       | (C/T)       |
| 42620       | CadSNP18215    | <i>Desi</i>      | Ca_Desig_denovo              | 18460914                       | (A/G)       |
| 42621       | CadSNP18216    | <i>Desi</i>      | Ca_Desig_denovo              | 18461468                       | (C/A)       |
| 42622       | CadSNP18217    | <i>Desi</i>      | Ca_Desig_denovo              | 18464035                       | (A/C)       |
| 42623       | CadSNP18218    | <i>Desi</i>      | Ca_Desig_denovo              | 18467161                       | (C/T)       |
| 42624       | CadSNP18219    | <i>Desi</i>      | Ca_Desig_denovo              | 18471034                       | (G/C)       |
| 42625       | CadSNP18220    | <i>Desi</i>      | Ca_Desig_denovo              | 18479303                       | (G/C)       |
| 42626       | CadSNP18221    | <i>Desi</i>      | Ca_Desig_denovo              | 18479373                       | (T/C)       |
| 42627       | CadSNP18222    | <i>Desi</i>      | Ca_Desig_denovo              | 18480781                       | (T/C)       |
| 42628       | CadSNP18223    | <i>Desi</i>      | Ca_Desig_denovo              | 18480805                       | (G/C)       |
| 42629       | CadSNP18224    | <i>Desi</i>      | Ca_Desig_denovo              | 18481083                       | (A/G)       |
| 42630       | CadSNP18225    | <i>Desi</i>      | Ca_Desig_denovo              | 18482111                       | (C/A)       |
| 42631       | CadSNP18226    | <i>Desi</i>      | Ca_Desig_denovo              | 18482120                       | (A/G)       |
| 42632       | CadSNP18227    | <i>Desi</i>      | Ca_Desig_denovo              | 18482790                       | (G/A)       |
| 42633       | CadSNP18228    | <i>Desi</i>      | Ca_Desig_denovo              | 18483414                       | (C/T)       |
| 42634       | CadSNP18229    | <i>Desi</i>      | Ca_Desig_denovo              | 18483424                       | (G/A)       |
| 42635       | CadSNP18230    | <i>Desi</i>      | Ca_Desig_denovo              | 18486559                       | (C/T)       |

| <b>S.N.</b> | <b>SNP IDs</b> | <b>Cultivars</b> | <b>Chromosomes/scaffolds</b> | <b>Physical positions (bp)</b> | <b>SNPs</b> |
|-------------|----------------|------------------|------------------------------|--------------------------------|-------------|
| 42636       | CadSNP18231    | <i>Desi</i>      | Ca_Desig_denovo              | 18486609                       | (C/T)       |
| 42637       | CadSNP18232    | <i>Desi</i>      | Ca_Desig_denovo              | 18498941                       | (A/C)       |
| 42638       | CadSNP18233    | <i>Desi</i>      | Ca_Desig_denovo              | 18503350                       | (T/C)       |
| 42639       | CadSNP18234    | <i>Desi</i>      | Ca_Desig_denovo              | 18522278                       | (T/C)       |
| 42640       | CadSNP18235    | <i>Desi</i>      | Ca_Desig_denovo              | 18523312                       | (A/C)       |
| 42641       | CadSNP18236    | <i>Desi</i>      | Ca_Desig_denovo              | 18525667                       | (A/C)       |
| 42642       | CadSNP18237    | <i>Desi</i>      | Ca_Desig_denovo              | 18525894                       | (A/G)       |
| 42643       | CadSNP18238    | <i>Desi</i>      | Ca_Desig_denovo              | 18529402                       | (C/G)       |
| 42644       | CadSNP18239    | <i>Desi</i>      | Ca_Desig_denovo              | 18536316                       | (G/A)       |
| 42645       | CadSNP18240    | <i>Desi</i>      | Ca_Desig_denovo              | 18545607                       | (T/C)       |
| 42646       | CadSNP18241    | <i>Desi</i>      | Ca_Desig_denovo              | 18545638                       | (C/G)       |
| 42647       | CadSNP18242    | <i>Desi</i>      | Ca_Desig_denovo              | 18546644                       | (G/C)       |
| 42648       | CadSNP18243    | <i>Desi</i>      | Ca_Desig_denovo              | 18548290                       | (A/C)       |
| 42649       | CadSNP18244    | <i>Desi</i>      | Ca_Desig_denovo              | 18548292                       | (A/C)       |
| 42650       | CadSNP18245    | <i>Desi</i>      | Ca_Desig_denovo              | 18548522                       | (G/T)       |
| 42651       | CadSNP18246    | <i>Desi</i>      | Ca_Desig_denovo              | 18548531                       | (C/T)       |
| 42652       | CadSNP18247    | <i>Desi</i>      | Ca_Desig_denovo              | 18561802                       | (C/G)       |
| 42653       | CadSNP18248    | <i>Desi</i>      | Ca_Desig_denovo              | 18561871                       | (C/G)       |
| 42654       | CadSNP18249    | <i>Desi</i>      | Ca_Desig_denovo              | 18571655                       | (A/G)       |
| 42655       | CadSNP18250    | <i>Desi</i>      | Ca_Desig_denovo              | 18572956                       | (G/T)       |
| 42656       | CadSNP18251    | <i>Desi</i>      | Ca_Desig_denovo              | 18573014                       | (T/G)       |
| 42657       | CadSNP18252    | <i>Desi</i>      | Ca_Desig_denovo              | 18574909                       | (T/C)       |
| 42658       | CadSNP18253    | <i>Desi</i>      | Ca_Desig_denovo              | 18577514                       | (A/C)       |
| 42659       | CadSNP18254    | <i>Desi</i>      | Ca_Desig_denovo              | 18577517                       | (C/T)       |
| 42660       | CadSNP18255    | <i>Desi</i>      | Ca_Desig_denovo              | 18580153                       | (C/G)       |
| 42661       | CadSNP18256    | <i>Desi</i>      | Ca_Desig_denovo              | 18592320                       | (A/G)       |
| 42662       | CadSNP18257    | <i>Desi</i>      | Ca_Desig_denovo              | 18592373                       | (T/G)       |
| 42663       | CadSNP18258    | <i>Desi</i>      | Ca_Desig_denovo              | 18593345                       | (A/C)       |
| 42664       | CadSNP18259    | <i>Desi</i>      | Ca_Desig_denovo              | 18593353                       | (A/G)       |
| 42665       | CadSNP18260    | <i>Desi</i>      | Ca_Desig_denovo              | 18596938                       | (T/C)       |
| 42666       | CadSNP18261    | <i>Desi</i>      | Ca_Desig_denovo              | 18596952                       | (G/A)       |
| 42667       | CadSNP18262    | <i>Desi</i>      | Ca_Desig_denovo              | 18597023                       | (A/G)       |
| 42668       | CadSNP18263    | <i>Desi</i>      | Ca_Desig_denovo              | 18598246                       | (T/C)       |
| 42669       | CadSNP18264    | <i>Desi</i>      | Ca_Desig_denovo              | 18598267                       | (T/C)       |
| 42670       | CadSNP18265    | <i>Desi</i>      | Ca_Desig_denovo              | 18598273                       | (G/A)       |
| 42671       | CadSNP18266    | <i>Desi</i>      | Ca_Desig_denovo              | 18605329                       | (G/A)       |
| 42672       | CadSNP18267    | <i>Desi</i>      | Ca_Desig_denovo              | 18605341                       | (A/G)       |
| 42673       | CadSNP18268    | <i>Desi</i>      | Ca_Desig_denovo              | 18607736                       | (A/G)       |

| <b>S.N.</b> | <b>SNP IDs</b> | <b>Cultivars</b> | <b>Chromosomes/scaffolds</b> | <b>Physical positions (bp)</b> | <b>SNPs</b> |
|-------------|----------------|------------------|------------------------------|--------------------------------|-------------|
| 42674       | CadSNP18269    | <i>Desi</i>      | Ca_Desig_denovo              | 18608599                       | (G/A)       |
| 42675       | CadSNP18270    | <i>Desi</i>      | Ca_Desig_denovo              | 18608750                       | (C/T)       |
| 42676       | CadSNP18271    | <i>Desi</i>      | Ca_Desig_denovo              | 18609923                       | (A/G)       |
| 42677       | CadSNP18272    | <i>Desi</i>      | Ca_Desig_denovo              | 18610441                       | (T/C)       |
| 42678       | CadSNP18273    | <i>Desi</i>      | Ca_Desig_denovo              | 18610462                       | (T/C)       |
| 42679       | CadSNP18274    | <i>Desi</i>      | Ca_Desig_denovo              | 18610474                       | (G/C)       |
| 42680       | CadSNP18275    | <i>Desi</i>      | Ca_Desig_denovo              | 18611319                       | (A/T)       |
| 42681       | CadSNP18276    | <i>Desi</i>      | Ca_Desig_denovo              | 18624073                       | (G/A)       |
| 42682       | CadSNP18277    | <i>Desi</i>      | Ca_Desig_denovo              | 18626186                       | (A/C)       |
| 42683       | CadSNP18278    | <i>Desi</i>      | Ca_Desig_denovo              | 18630668                       | (A/G)       |
| 42684       | CadSNP18279    | <i>Desi</i>      | Ca_Desig_denovo              | 18634548                       | (T/C)       |
| 42685       | CadSNP18280    | <i>Desi</i>      | Ca_Desig_denovo              | 18641216                       | (C/T)       |
| 42686       | CadSNP18281    | <i>Desi</i>      | Ca_Desig_denovo              | 18642446                       | (G/C)       |
| 42687       | CadSNP18282    | <i>Desi</i>      | Ca_Desig_denovo              | 18647895                       | (A/C)       |
| 42688       | CadSNP18283    | <i>Desi</i>      | Ca_Desig_denovo              | 18658789                       | (A/G)       |
| 42689       | CadSNP18284    | <i>Desi</i>      | Ca_Desig_denovo              | 18659350                       | (T/C)       |
| 42690       | CadSNP18285    | <i>Desi</i>      | Ca_Desig_denovo              | 18659381                       | (T/C)       |
| 42691       | CadSNP18286    | <i>Desi</i>      | Ca_Desig_denovo              | 18664029                       | (C/T)       |
| 42692       | CadSNP18287    | <i>Desi</i>      | Ca_Desig_denovo              | 18664056                       | (T/C)       |
| 42693       | CadSNP18288    | <i>Desi</i>      | Ca_Desig_denovo              | 18666691                       | (A/G)       |
| 42694       | CadSNP18289    | <i>Desi</i>      | Ca_Desig_denovo              | 18666715                       | (G/C)       |
| 42695       | CadSNP18290    | <i>Desi</i>      | Ca_Desig_denovo              | 18668140                       | (G/T)       |
| 42696       | CadSNP18291    | <i>Desi</i>      | Ca_Desig_denovo              | 18674136                       | (C/A)       |
| 42697       | CadSNP18292    | <i>Desi</i>      | Ca_Desig_denovo              | 18674187                       | (A/C)       |
| 42698       | CadSNP18293    | <i>Desi</i>      | Ca_Desig_denovo              | 18674551                       | (C/G)       |
| 42699       | CadSNP18294    | <i>Desi</i>      | Ca_Desig_denovo              | 18674563                       | (T/C)       |
| 42700       | CadSNP18295    | <i>Desi</i>      | Ca_Desig_denovo              | 18677298                       | (A/C)       |
| 42701       | CadSNP18296    | <i>Desi</i>      | Ca_Desig_denovo              | 18681793                       | (T/A)       |
| 42702       | CadSNP18297    | <i>Desi</i>      | Ca_Desig_denovo              | 18682417                       | (C/T)       |
| 42703       | CadSNP18298    | <i>Desi</i>      | Ca_Desig_denovo              | 18685453                       | (C/T)       |
| 42704       | CadSNP18299    | <i>Desi</i>      | Ca_Desig_denovo              | 18685600                       | (A/G)       |
| 42705       | CadSNP18300    | <i>Desi</i>      | Ca_Desig_denovo              | 18694159                       | (G/T)       |
| 42706       | CadSNP18301    | <i>Desi</i>      | Ca_Desig_denovo              | 18694180                       | (T/A)       |
| 42707       | CadSNP18302    | <i>Desi</i>      | Ca_Desig_denovo              | 18696846                       | (C/T)       |
| 42708       | CadSNP18303    | <i>Desi</i>      | Ca_Desig_denovo              | 18696851                       | (C/T)       |
| 42709       | CadSNP18304    | <i>Desi</i>      | Ca_Desig_denovo              | 18703373                       | (G/C)       |
| 42710       | CadSNP18305    | <i>Desi</i>      | Ca_Desig_denovo              | 18704184                       | (C/G)       |
| 42711       | CadSNP18306    | <i>Desi</i>      | Ca_Desig_denovo              | 18706112                       | (A/C)       |

| <b>S.N.</b> | <b>SNP IDs</b> | <b>Cultivars</b> | <b>Chromosomes/scaffolds</b> | <b>Physical positions (bp)</b> | <b>SNPs</b> |
|-------------|----------------|------------------|------------------------------|--------------------------------|-------------|
| 42712       | CadSNP18307    | <i>Desi</i>      | Ca_Desig_denovo              | 18706141                       | (T/C)       |
| 42713       | CadSNP18308    | <i>Desi</i>      | Ca_Desig_denovo              | 18706147                       | (G/A)       |
| 42714       | CadSNP18309    | <i>Desi</i>      | Ca_Desig_denovo              | 18706802                       | (A/T)       |
| 42715       | CadSNP18310    | <i>Desi</i>      | Ca_Desig_denovo              | 18720361                       | (C/G)       |
| 42716       | CadSNP18311    | <i>Desi</i>      | Ca_Desig_denovo              | 18720367                       | (A/C)       |
| 42717       | CadSNP18312    | <i>Desi</i>      | Ca_Desig_denovo              | 18735982                       | (A/G)       |
| 42718       | CadSNP18313    | <i>Desi</i>      | Ca_Desig_denovo              | 18736607                       | (G/A)       |
| 42719       | CadSNP18314    | <i>Desi</i>      | Ca_Desig_denovo              | 18737748                       | (C/G)       |
| 42720       | CadSNP18315    | <i>Desi</i>      | Ca_Desig_denovo              | 18737766                       | (A/G)       |
| 42721       | CadSNP18316    | <i>Desi</i>      | Ca_Desig_denovo              | 18739696                       | (T/C)       |
| 42722       | CadSNP18317    | <i>Desi</i>      | Ca_Desig_denovo              | 18739739                       | (T/A)       |
| 42723       | CadSNP18318    | <i>Desi</i>      | Ca_Desig_denovo              | 18743617                       | (C/T)       |
| 42724       | CadSNP18319    | <i>Desi</i>      | Ca_Desig_denovo              | 18743626                       | (C/T)       |
| 42725       | CadSNP18320    | <i>Desi</i>      | Ca_Desig_denovo              | 18744449                       | (C/T)       |
| 42726       | CadSNP18321    | <i>Desi</i>      | Ca_Desig_denovo              | 18744464                       | (C/G)       |
| 42727       | CadSNP18322    | <i>Desi</i>      | Ca_Desig_denovo              | 18746767                       | (G/A)       |
| 42728       | CadSNP18323    | <i>Desi</i>      | Ca_Desig_denovo              | 18746845                       | (A/G)       |
| 42729       | CadSNP18324    | <i>Desi</i>      | Ca_Desig_denovo              | 18751695                       | (G/C)       |
| 42730       | CadSNP18325    | <i>Desi</i>      | Ca_Desig_denovo              | 18751703                       | (C/T)       |
| 42731       | CadSNP18326    | <i>Desi</i>      | Ca_Desig_denovo              | 18752113                       | (C/T)       |
| 42732       | CadSNP18327    | <i>Desi</i>      | Ca_Desig_denovo              | 18752383                       | (C/T)       |
| 42733       | CadSNP18328    | <i>Desi</i>      | Ca_Desig_denovo              | 18755059                       | (C/T)       |
| 42734       | CadSNP18329    | <i>Desi</i>      | Ca_Desig_denovo              | 18755062                       | (A/G)       |
| 42735       | CadSNP18330    | <i>Desi</i>      | Ca_Desig_denovo              | 18755068                       | (A/C)       |
| 42736       | CadSNP18331    | <i>Desi</i>      | Ca_Desig_denovo              | 18757138                       | (C/T)       |
| 42737       | CadSNP18332    | <i>Desi</i>      | Ca_Desig_denovo              | 18757168                       | (A/G)       |
| 42738       | CadSNP18333    | <i>Desi</i>      | Ca_Desig_denovo              | 18760339                       | (G/A)       |
| 42739       | CadSNP18334    | <i>Desi</i>      | Ca_Desig_denovo              | 18762107                       | (T/C)       |
| 42740       | CadSNP18335    | <i>Desi</i>      | Ca_Desig_denovo              | 18762155                       | (A/G)       |
| 42741       | CadSNP18336    | <i>Desi</i>      | Ca_Desig_denovo              | 18772901                       | (T/C)       |
| 42742       | CadSNP18337    | <i>Desi</i>      | Ca_Desig_denovo              | 18772904                       | (G/A)       |
| 42743       | CadSNP18338    | <i>Desi</i>      | Ca_Desig_denovo              | 18776896                       | (T/C)       |
| 42744       | CadSNP18339    | <i>Desi</i>      | Ca_Desig_denovo              | 18779501                       | (G/A)       |
| 42745       | CadSNP18340    | <i>Desi</i>      | Ca_Desig_denovo              | 18779560                       | (C/A)       |
| 42746       | CadSNP18341    | <i>Desi</i>      | Ca_Desig_denovo              | 18780903                       | (C/T)       |
| 42747       | CadSNP18342    | <i>Desi</i>      | Ca_Desig_denovo              | 18783577                       | (T/G)       |
| 42748       | CadSNP18343    | <i>Desi</i>      | Ca_Desig_denovo              | 18783998                       | (G/C)       |
| 42749       | CadSNP18344    | <i>Desi</i>      | Ca_Desig_denovo              | 18784015                       | (G/C)       |

| <b>S.N.</b> | <b>SNP IDs</b> | <b>Cultivars</b> | <b>Chromosomes/scaffolds</b> | <b>Physical positions (bp)</b> | <b>SNPs</b> |
|-------------|----------------|------------------|------------------------------|--------------------------------|-------------|
| 42750       | CadSNP18345    | <i>Desi</i>      | Ca_Desig_denovo              | 18784160                       | (C/G)       |
| 42751       | CadSNP18346    | <i>Desi</i>      | Ca_Desig_denovo              | 18784175                       | (G/A)       |
| 42752       | CadSNP18347    | <i>Desi</i>      | Ca_Desig_denovo              | 18790304                       | (G/C)       |
| 42753       | CadSNP18348    | <i>Desi</i>      | Ca_Desig_denovo              | 18790346                       | (C/G)       |
| 42754       | CadSNP18349    | <i>Desi</i>      | Ca_Desig_denovo              | 18798922                       | (A/C)       |
| 42755       | CadSNP18350    | <i>Desi</i>      | Ca_Desig_denovo              | 18798927                       | (G/C)       |
| 42756       | CadSNP18351    | <i>Desi</i>      | Ca_Desig_denovo              | 18798928                       | (G/T)       |
| 42757       | CadSNP18352    | <i>Desi</i>      | Ca_Desig_denovo              | 18800619                       | (C/G)       |
| 42758       | CadSNP18353    | <i>Desi</i>      | Ca_Desig_denovo              | 18803516                       | (C/T)       |
| 42759       | CadSNP18354    | <i>Desi</i>      | Ca_Desig_denovo              | 18807476                       | (C/G)       |
| 42760       | CadSNP18355    | <i>Desi</i>      | Ca_Desig_denovo              | 18807484                       | (A/T)       |
| 42761       | CadSNP18356    | <i>Desi</i>      | Ca_Desig_denovo              | 18809362                       | (G/A)       |
| 42762       | CadSNP18357    | <i>Desi</i>      | Ca_Desig_denovo              | 18809398                       | (G/A)       |
| 42763       | CadSNP18358    | <i>Desi</i>      | Ca_Desig_denovo              | 18810662                       | (A/G)       |
| 42764       | CadSNP18359    | <i>Desi</i>      | Ca_Desig_denovo              | 18810671                       | (C/G)       |
| 42765       | CadSNP18360    | <i>Desi</i>      | Ca_Desig_denovo              | 18818185                       | (C/T)       |
| 42766       | CadSNP18361    | <i>Desi</i>      | Ca_Desig_denovo              | 18818191                       | (C/T)       |
| 42767       | CadSNP18362    | <i>Desi</i>      | Ca_Desig_denovo              | 18818610                       | (G/A)       |
| 42768       | CadSNP18363    | <i>Desi</i>      | Ca_Desig_denovo              | 18820813                       | (C/T)       |
| 42769       | CadSNP18364    | <i>Desi</i>      | Ca_Desig_denovo              | 18825498                       | (C/A)       |
| 42770       | CadSNP18365    | <i>Desi</i>      | Ca_Desig_denovo              | 18832332                       | (C/T)       |
| 42771       | CadSNP18366    | <i>Desi</i>      | Ca_Desig_denovo              | 18832335                       | (C/T)       |
| 42772       | CadSNP18367    | <i>Desi</i>      | Ca_Desig_denovo              | 18832833                       | (C/T)       |
| 42773       | CadSNP18368    | <i>Desi</i>      | Ca_Desig_denovo              | 18832862                       | (A/G)       |
| 42774       | CadSNP18369    | <i>Desi</i>      | Ca_Desig_denovo              | 18836965                       | (C/G)       |
| 42775       | CadSNP18370    | <i>Desi</i>      | Ca_Desig_denovo              | 18845037                       | (A/G)       |
| 42776       | CadSNP18371    | <i>Desi</i>      | Ca_Desig_denovo              | 18846406                       | (C/G)       |
| 42777       | CadSNP18372    | <i>Desi</i>      | Ca_Desig_denovo              | 18846411                       | (G/C)       |
| 42778       | CadSNP18373    | <i>Desi</i>      | Ca_Desig_denovo              | 18858843                       | (C/T)       |
| 42779       | CadSNP18374    | <i>Desi</i>      | Ca_Desig_denovo              | 18858846                       | (T/C)       |
| 42780       | CadSNP18375    | <i>Desi</i>      | Ca_Desig_denovo              | 18862830                       | (G/T)       |
| 42781       | CadSNP18376    | <i>Desi</i>      | Ca_Desig_denovo              | 18864041                       | (C/T)       |
| 42782       | CadSNP18377    | <i>Desi</i>      | Ca_Desig_denovo              | 18872500                       | (A/C)       |
| 42783       | CadSNP18378    | <i>Desi</i>      | Ca_Desig_denovo              | 18875128                       | (T/G)       |
| 42784       | CadSNP18379    | <i>Desi</i>      | Ca_Desig_denovo              | 18875589                       | (A/G)       |
| 42785       | CadSNP18380    | <i>Desi</i>      | Ca_Desig_denovo              | 18875597                       | (T/A)       |
| 42786       | CadSNP18381    | <i>Desi</i>      | Ca_Desig_denovo              | 18878155                       | (T/C)       |
| 42787       | CadSNP18382    | <i>Desi</i>      | Ca_Desig_denovo              | 18878163                       | (C/G)       |



| <b>S.N.</b> | <b>SNP IDs</b> | <b>Cultivars</b> | <b>Chromosomes/scaffolds</b> | <b>Physical positions (bp)</b> | <b>SNPs</b> |
|-------------|----------------|------------------|------------------------------|--------------------------------|-------------|
| 42788       | CadSNP18383    | <i>Desi</i>      | Ca_Desig_denovo              | 18880220                       | (A/G)       |
| 42789       | CadSNP18384    | <i>Desi</i>      | Ca_Desig_denovo              | 18880226                       | (G/A)       |
| 42790       | CadSNP18385    | <i>Desi</i>      | Ca_Desig_denovo              | 18880625                       | (G/A)       |
| 42791       | CadSNP18386    | <i>Desi</i>      | Ca_Desig_denovo              | 18894882                       | (C/T)       |
| 42792       | CadSNP18387    | <i>Desi</i>      | Ca_Desig_denovo              | 18896752                       | (G/A)       |
| 42793       | CadSNP18388    | <i>Desi</i>      | Ca_Desig_denovo              | 18899015                       | (C/T)       |
| 42794       | CadSNP18389    | <i>Desi</i>      | Ca_Desig_denovo              | 18899034                       | (C/A)       |
| 42795       | CadSNP18390    | <i>Desi</i>      | Ca_Desig_denovo              | 18900770                       | (C/T)       |
| 42796       | CadSNP18391    | <i>Desi</i>      | Ca_Desig_denovo              | 18901615                       | (A/G)       |
| 42797       | CadSNP18392    | <i>Desi</i>      | Ca_Desig_denovo              | 18901618                       | (A/G)       |
| 42798       | CadSNP18393    | <i>Desi</i>      | Ca_Desig_denovo              | 18902578                       | (G/A)       |
| 42799       | CadSNP18394    | <i>Desi</i>      | Ca_Desig_denovo              | 18903581                       | (G/T)       |
| 42800       | CadSNP18395    | <i>Desi</i>      | Ca_Desig_denovo              | 18903587                       | (G/A)       |
| 42801       | CadSNP18396    | <i>Desi</i>      | Ca_Desig_denovo              | 18905014                       | (C/T)       |
| 42802       | CadSNP18397    | <i>Desi</i>      | Ca_Desig_denovo              | 18908938                       | (T/C)       |
| 42803       | CadSNP18398    | <i>Desi</i>      | Ca_Desig_denovo              | 18908944                       | (T/G)       |
| 42804       | CadSNP18399    | <i>Desi</i>      | Ca_Desig_denovo              | 18910188                       | (G/C)       |
| 42805       | CadSNP18400    | <i>Desi</i>      | Ca_Desig_denovo              | 18910197                       | (T/C)       |
| 42806       | CadSNP18401    | <i>Desi</i>      | Ca_Desig_denovo              | 18910361                       | (G/A)       |
| 42807       | CadSNP18402    | <i>Desi</i>      | Ca_Desig_denovo              | 18910406                       | (A/G)       |
| 42808       | CadSNP18403    | <i>Desi</i>      | Ca_Desig_denovo              | 18910991                       | (T/G)       |
| 42809       | CadSNP18404    | <i>Desi</i>      | Ca_Desig_denovo              | 18916428                       | (A/G)       |
| 42810       | CadSNP18405    | <i>Desi</i>      | Ca_Desig_denovo              | 18922561                       | (G/C)       |
| 42811       | CadSNP18406    | <i>Desi</i>      | Ca_Desig_denovo              | 18922570                       | (C/T)       |
| 42812       | CadSNP18407    | <i>Desi</i>      | Ca_Desig_denovo              | 18923194                       | (T/G)       |
| 42813       | CadSNP18408    | <i>Desi</i>      | Ca_Desig_denovo              | 18923225                       | (C/G)       |
| 42814       | CadSNP18409    | <i>Desi</i>      | Ca_Desig_denovo              | 18926092                       | (G/T)       |
| 42815       | CadSNP18410    | <i>Desi</i>      | Ca_Desig_denovo              | 18927746                       | (A/T)       |
| 42816       | CadSNP18411    | <i>Desi</i>      | Ca_Desig_denovo              | 18927767                       | (T/C)       |
| 42817       | CadSNP18412    | <i>Desi</i>      | Ca_Desig_denovo              | 18928904                       | (T/G)       |
| 42818       | CadSNP18413    | <i>Desi</i>      | Ca_Desig_denovo              | 18938387                       | (T/C)       |
| 42819       | CadSNP18414    | <i>Desi</i>      | Ca_Desig_denovo              | 18938418                       | (G/A)       |
| 42820       | CadSNP18415    | <i>Desi</i>      | Ca_Desig_denovo              | 18951485                       | (C/T)       |
| 42821       | CadSNP18416    | <i>Desi</i>      | Ca_Desig_denovo              | 18951497                       | (G/A)       |
| 42822       | CadSNP18417    | <i>Desi</i>      | Ca_Desig_denovo              | 18951539                       | (A/C)       |
| 42823       | CadSNP18418    | <i>Desi</i>      | Ca_Desig_denovo              | 18951541                       | (A/T)       |
| 42824       | CadSNP18419    | <i>Desi</i>      | Ca_Desig_denovo              | 18952016                       | (A/C)       |
| 42825       | CadSNP18420    | <i>Desi</i>      | Ca_Desig_denovo              | 18952772                       | (C/G)       |

| <b>S.N.</b> | <b>SNP IDs</b> | <b>Cultivars</b> | <b>Chromosomes/scaffolds</b> | <b>Physical positions (bp)</b> | <b>SNPs</b> |
|-------------|----------------|------------------|------------------------------|--------------------------------|-------------|
| 42826       | CadSNP18421    | <i>Desi</i>      | Ca_Desig_denovo              | 18952776                       | (G/A)       |
| 42827       | CadSNP18422    | <i>Desi</i>      | Ca_Desig_denovo              | 18963863                       | (A/G)       |
| 42828       | CadSNP18423    | <i>Desi</i>      | Ca_Desig_denovo              | 18963883                       | (A/C)       |
| 42829       | CadSNP18424    | <i>Desi</i>      | Ca_Desig_denovo              | 18972580                       | (C/T)       |
| 42830       | CadSNP18425    | <i>Desi</i>      | Ca_Desig_denovo              | 18977333                       | (A/G)       |
| 42831       | CadSNP18426    | <i>Desi</i>      | Ca_Desig_denovo              | 18977390                       | (T/C)       |
| 42832       | CadSNP18427    | <i>Desi</i>      | Ca_Desig_denovo              | 18980785                       | (T/C)       |
| 42833       | CadSNP18428    | <i>Desi</i>      | Ca_Desig_denovo              | 18980963                       | (T/C)       |
| 42834       | CadSNP18429    | <i>Desi</i>      | Ca_Desig_denovo              | 18984763                       | (G/C)       |
| 42835       | CadSNP18430    | <i>Desi</i>      | Ca_Desig_denovo              | 18984787                       | (A/C)       |
| 42836       | CadSNP18431    | <i>Desi</i>      | Ca_Desig_denovo              | 18987580                       | (T/C)       |
| 42837       | CadSNP18432    | <i>Desi</i>      | Ca_Desig_denovo              | 18987583                       | (T/C)       |
| 42838       | CadSNP18433    | <i>Desi</i>      | Ca_Desig_denovo              | 18988808                       | (T/G)       |
| 42839       | CadSNP18434    | <i>Desi</i>      | Ca_Desig_denovo              | 18989351                       | (G/T)       |
| 42840       | CadSNP18435    | <i>Desi</i>      | Ca_Desig_denovo              | 18989519                       | (G/C)       |
| 42841       | CadSNP18436    | <i>Desi</i>      | Ca_Desig_denovo              | 18989562                       | (T/C)       |
| 42842       | CadSNP18437    | <i>Desi</i>      | Ca_Desig_denovo              | 18990766                       | (C/G)       |
| 42843       | CadSNP18438    | <i>Desi</i>      | Ca_Desig_denovo              | 18993587                       | (T/C)       |
| 42844       | CadSNP18439    | <i>Desi</i>      | Ca_Desig_denovo              | 18994187                       | (T/C)       |
| 42845       | CadSNP18440    | <i>Desi</i>      | Ca_Desig_denovo              | 19000611                       | (A/C)       |
| 42846       | CadSNP18441    | <i>Desi</i>      | Ca_Desig_denovo              | 19006980                       | (C/T)       |
| 42847       | CadSNP18442    | <i>Desi</i>      | Ca_Desig_denovo              | 19007034                       | (G/A)       |
| 42848       | CadSNP18443    | <i>Desi</i>      | Ca_Desig_denovo              | 19008576                       | (T/G)       |
| 42849       | CadSNP18444    | <i>Desi</i>      | Ca_Desig_denovo              | 19008587                       | (G/C)       |
| 42850       | CadSNP18445    | <i>Desi</i>      | Ca_Desig_denovo              | 19018619                       | (G/C)       |
| 42851       | CadSNP18446    | <i>Desi</i>      | Ca_Desig_denovo              | 19019009                       | (C/A)       |
| 42852       | CadSNP18447    | <i>Desi</i>      | Ca_Desig_denovo              | 19022991                       | (T/G)       |
| 42853       | CadSNP18448    | <i>Desi</i>      | Ca_Desig_denovo              | 19024274                       | (T/C)       |
| 42854       | CadSNP18449    | <i>Desi</i>      | Ca_Desig_denovo              | 19030289                       | (C/A)       |
| 42855       | CadSNP18450    | <i>Desi</i>      | Ca_Desig_denovo              | 19031643                       | (C/G)       |
| 42856       | CadSNP18451    | <i>Desi</i>      | Ca_Desig_denovo              | 19036325                       | (A/G)       |
| 42857       | CadSNP18452    | <i>Desi</i>      | Ca_Desig_denovo              | 19039413                       | (A/G)       |
| 42858       | CadSNP18453    | <i>Desi</i>      | Ca_Desig_denovo              | 19039425                       | (C/A)       |
| 42859       | CadSNP18454    | <i>Desi</i>      | Ca_Desig_denovo              | 19049603                       | (C/G)       |
| 42860       | CadSNP18455    | <i>Desi</i>      | Ca_Desig_denovo              | 19049760                       | (C/T)       |
| 42861       | CadSNP18456    | <i>Desi</i>      | Ca_Desig_denovo              | 19053034                       | (T/C)       |
| 42862       | CadSNP18457    | <i>Desi</i>      | Ca_Desig_denovo              | 19055666                       | (G/T)       |
| 42863       | CadSNP18458    | <i>Desi</i>      | Ca_Desig_denovo              | 19058582                       | (G/A)       |

| <b>S.N.</b> | <b>SNP IDs</b> | <b>Cultivars</b> | <b>Chromosomes/scaffolds</b> | <b>Physical positions (bp)</b> | <b>SNPs</b> |
|-------------|----------------|------------------|------------------------------|--------------------------------|-------------|
| 42864       | CadSNP18459    | <i>Desi</i>      | Ca_Desig_denovo              | 19061338                       | (C/G)       |
| 42865       | CadSNP18460    | <i>Desi</i>      | Ca_Desig_denovo              | 19061354                       | (A/T)       |
| 42866       | CadSNP18461    | <i>Desi</i>      | Ca_Desig_denovo              | 19065462                       | (T/G)       |
| 42867       | CadSNP18462    | <i>Desi</i>      | Ca_Desig_denovo              | 19072384                       | (T/C)       |
| 42868       | CadSNP18463    | <i>Desi</i>      | Ca_Desig_denovo              | 19072398                       | (T/G)       |
| 42869       | CadSNP18464    | <i>Desi</i>      | Ca_Desig_denovo              | 19072411                       | (A/G)       |
| 42870       | CadSNP18465    | <i>Desi</i>      | Ca_Desig_denovo              | 19074378                       | (G/A)       |
| 42871       | CadSNP18466    | <i>Desi</i>      | Ca_Desig_denovo              | 19078252                       | (A/G)       |
| 42872       | CadSNP18467    | <i>Desi</i>      | Ca_Desig_denovo              | 19078282                       | (G/A)       |
| 42873       | CadSNP18468    | <i>Desi</i>      | Ca_Desig_denovo              | 19081732                       | (A/C)       |
| 42874       | CadSNP18469    | <i>Desi</i>      | Ca_Desig_denovo              | 19098995                       | (T/C)       |
| 42875       | CadSNP18470    | <i>Desi</i>      | Ca_Desig_denovo              | 19098996                       | (T/G)       |
| 42876       | CadSNP18471    | <i>Desi</i>      | Ca_Desig_denovo              | 19099915                       | (C/T)       |
| 42877       | CadSNP18472    | <i>Desi</i>      | Ca_Desig_denovo              | 19099942                       | (A/T)       |
| 42878       | CadSNP18473    | <i>Desi</i>      | Ca_Desig_denovo              | 19099994                       | (G/C)       |
| 42879       | CadSNP18474    | <i>Desi</i>      | Ca_Desig_denovo              | 19100036                       | (G/A)       |
| 42880       | CadSNP18475    | <i>Desi</i>      | Ca_Desig_denovo              | 19101580                       | (C/T)       |
| 42881       | CadSNP18476    | <i>Desi</i>      | Ca_Desig_denovo              | 19101589                       | (A/C)       |
| 42882       | CadSNP18477    | <i>Desi</i>      | Ca_Desig_denovo              | 19102118                       | (A/C)       |
| 42883       | CadSNP18478    | <i>Desi</i>      | Ca_Desig_denovo              | 19102138                       | (T/C)       |
| 42884       | CadSNP18479    | <i>Desi</i>      | Ca_Desig_denovo              | 19102504                       | (G/A)       |
| 42885       | CadSNP18480    | <i>Desi</i>      | Ca_Desig_denovo              | 19122215                       | (A/T)       |
| 42886       | CadSNP18481    | <i>Desi</i>      | Ca_Desig_denovo              | 19122287                       | (G/A)       |
| 42887       | CadSNP18482    | <i>Desi</i>      | Ca_Desig_denovo              | 19124066                       | (G/T)       |
| 42888       | CadSNP18483    | <i>Desi</i>      | Ca_Desig_denovo              | 19124069                       | (A/G)       |
| 42889       | CadSNP18484    | <i>Desi</i>      | Ca_Desig_denovo              | 19124104                       | (C/T)       |
| 42890       | CadSNP18485    | <i>Desi</i>      | Ca_Desig_denovo              | 19128250                       | (C/G)       |
| 42891       | CadSNP18486    | <i>Desi</i>      | Ca_Desig_denovo              | 19128320                       | (A/C)       |
| 42892       | CadSNP18487    | <i>Desi</i>      | Ca_Desig_denovo              | 19133364                       | (G/T)       |
| 42893       | CadSNP18488    | <i>Desi</i>      | Ca_Desig_denovo              | 19133410                       | (C/T)       |
| 42894       | CadSNP18489    | <i>Desi</i>      | Ca_Desig_denovo              | 19138570                       | (A/G)       |
| 42895       | CadSNP18490    | <i>Desi</i>      | Ca_Desig_denovo              | 19146023                       | (A/C)       |
| 42896       | CadSNP18491    | <i>Desi</i>      | Ca_Desig_denovo              | 19147879                       | (G/C)       |
| 42897       | CadSNP18492    | <i>Desi</i>      | Ca_Desig_denovo              | 19147915                       | (G/T)       |
| 42898       | CadSNP18493    | <i>Desi</i>      | Ca_Desig_denovo              | 19148499                       | (G/A)       |
| 42899       | CadSNP18494    | <i>Desi</i>      | Ca_Desig_denovo              | 19151602                       | (A/G)       |
| 42900       | CadSNP18495    | <i>Desi</i>      | Ca_Desig_denovo              | 19151604                       | (C/A)       |
| 42901       | CadSNP18496    | <i>Desi</i>      | Ca_Desig_denovo              | 19151983                       | (T/C)       |

| <b>S.N.</b> | <b>SNP IDs</b> | <b>Cultivars</b> | <b>Chromosomes/scaffolds</b> | <b>Physical positions (bp)</b> | <b>SNPs</b> |
|-------------|----------------|------------------|------------------------------|--------------------------------|-------------|
| 42902       | CadSNP18497    | <i>Desi</i>      | Ca_Desig_denovo              | 19152002                       | (G/A)       |
| 42903       | CadSNP18498    | <i>Desi</i>      | Ca_Desig_denovo              | 19160384                       | (G/C)       |
| 42904       | CadSNP18499    | <i>Desi</i>      | Ca_Desig_denovo              | 19160391                       | (A/C)       |
| 42905       | CadSNP18500    | <i>Desi</i>      | Ca_Desig_denovo              | 19170391                       | (C/T)       |
| 42906       | CadSNP18501    | <i>Desi</i>      | Ca_Desig_denovo              | 19170460                       | (C/A)       |
| 42907       | CadSNP18502    | <i>Desi</i>      | Ca_Desig_denovo              | 19173696                       | (T/C)       |
| 42908       | CadSNP18503    | <i>Desi</i>      | Ca_Desig_denovo              | 19190163                       | (C/A)       |
| 42909       | CadSNP18504    | <i>Desi</i>      | Ca_Desig_denovo              | 19192222                       | (T/C)       |
| 42910       | CadSNP18505    | <i>Desi</i>      | Ca_Desig_denovo              | 19192225                       | (C/T)       |
| 42911       | CadSNP18506    | <i>Desi</i>      | Ca_Desig_denovo              | 19195871                       | (T/G)       |
| 42912       | CadSNP18507    | <i>Desi</i>      | Ca_Desig_denovo              | 19195929                       | (G/C)       |
| 42913       | CadSNP18508    | <i>Desi</i>      | Ca_Desig_denovo              | 19198956                       | (G/A)       |
| 42914       | CadSNP18509    | <i>Desi</i>      | Ca_Desig_denovo              | 19199001                       | (G/T)       |
| 42915       | CadSNP18510    | <i>Desi</i>      | Ca_Desig_denovo              | 19199910                       | (T/C)       |
| 42916       | CadSNP18511    | <i>Desi</i>      | Ca_Desig_denovo              | 19199918                       | (A/G)       |
| 42917       | CadSNP18512    | <i>Desi</i>      | Ca_Desig_denovo              | 19206109                       | (G/A)       |
| 42918       | CadSNP18513    | <i>Desi</i>      | Ca_Desig_denovo              | 19206115                       | (C/T)       |
| 42919       | CadSNP18514    | <i>Desi</i>      | Ca_Desig_denovo              | 19206118                       | (C/T)       |
| 42920       | CadSNP18515    | <i>Desi</i>      | Ca_Desig_denovo              | 19220952                       | (G/C)       |
| 42921       | CadSNP18516    | <i>Desi</i>      | Ca_Desig_denovo              | 19222108                       | (G/T)       |
| 42922       | CadSNP18517    | <i>Desi</i>      | Ca_Desig_denovo              | 19225642                       | (A/G)       |
| 42923       | CadSNP18518    | <i>Desi</i>      | Ca_Desig_denovo              | 19225647                       | (G/A)       |
| 42924       | CadSNP18519    | <i>Desi</i>      | Ca_Desig_denovo              | 19229759                       | (G/A)       |
| 42925       | CadSNP18520    | <i>Desi</i>      | Ca_Desig_denovo              | 19240979                       | (C/T)       |
| 42926       | CadSNP18521    | <i>Desi</i>      | Ca_Desig_denovo              | 19241030                       | (T/C)       |
| 42927       | CadSNP18522    | <i>Desi</i>      | Ca_Desig_denovo              | 19247038                       | (T/C)       |
| 42928       | CadSNP18523    | <i>Desi</i>      | Ca_Desig_denovo              | 19247064                       | (T/C)       |
| 42929       | CadSNP18524    | <i>Desi</i>      | Ca_Desig_denovo              | 19252052                       | (G/A)       |
| 42930       | CadSNP18525    | <i>Desi</i>      | Ca_Desig_denovo              | 19255777                       | (A/G)       |
| 42931       | CadSNP18526    | <i>Desi</i>      | Ca_Desig_denovo              | 19260042                       | (A/G)       |
| 42932       | CadSNP18527    | <i>Desi</i>      | Ca_Desig_denovo              | 19264122                       | (C/T)       |
| 42933       | CadSNP18528    | <i>Desi</i>      | Ca_Desig_denovo              | 19269246                       | (C/T)       |
| 42934       | CadSNP18529    | <i>Desi</i>      | Ca_Desig_denovo              | 19274684                       | (C/T)       |
| 42935       | CadSNP18530    | <i>Desi</i>      | Ca_Desig_denovo              | 19274705                       | (C/G)       |
| 42936       | CadSNP18531    | <i>Desi</i>      | Ca_Desig_denovo              | 19275745                       | (C/A)       |
| 42937       | CadSNP18532    | <i>Desi</i>      | Ca_Desig_denovo              | 19275762                       | (T/G)       |
| 42938       | CadSNP18533    | <i>Desi</i>      | Ca_Desig_denovo              | 19277110                       | (G/A)       |
| 42939       | CadSNP18534    | <i>Desi</i>      | Ca_Desig_denovo              | 19285460                       | (C/T)       |

| <b>S.N.</b> | <b>SNP IDs</b> | <b>Cultivars</b> | <b>Chromosomes/scaffolds</b> | <b>Physical positions (bp)</b> | <b>SNPs</b> |
|-------------|----------------|------------------|------------------------------|--------------------------------|-------------|
| 42940       | CadSNP18535    | <i>Desi</i>      | Ca_Desig_denovo              | 19290049                       | (C/T)       |
| 42941       | CadSNP18536    | <i>Desi</i>      | Ca_Desig_denovo              | 19290059                       | (T/G)       |
| 42942       | CadSNP18537    | <i>Desi</i>      | Ca_Desig_denovo              | 19295584                       | (G/T)       |
| 42943       | CadSNP18538    | <i>Desi</i>      | Ca_Desig_denovo              | 19299202                       | (A/G)       |
| 42944       | CadSNP18539    | <i>Desi</i>      | Ca_Desig_denovo              | 19301797                       | (C/T)       |
| 42945       | CadSNP18540    | <i>Desi</i>      | Ca_Desig_denovo              | 19303304                       | (G/A)       |
| 42946       | CadSNP18541    | <i>Desi</i>      | Ca_Desig_denovo              | 19304948                       | (C/A)       |
| 42947       | CadSNP18542    | <i>Desi</i>      | Ca_Desig_denovo              | 19306435                       | (T/C)       |
| 42948       | CadSNP18543    | <i>Desi</i>      | Ca_Desig_denovo              | 19306465                       | (T/C)       |
| 42949       | CadSNP18544    | <i>Desi</i>      | Ca_Desig_denovo              | 19307162                       | (T/G)       |
| 42950       | CadSNP18545    | <i>Desi</i>      | Ca_Desig_denovo              | 19308057                       | (A/G)       |
| 42951       | CadSNP18546    | <i>Desi</i>      | Ca_Desig_denovo              | 19310554                       | (G/A)       |
| 42952       | CadSNP18547    | <i>Desi</i>      | Ca_Desig_denovo              | 19310584                       | (C/G)       |
| 42953       | CadSNP18548    | <i>Desi</i>      | Ca_Desig_denovo              | 19312420                       | (C/A)       |
| 42954       | CadSNP18549    | <i>Desi</i>      | Ca_Desig_denovo              | 19312426                       | (C/T)       |
| 42955       | CadSNP18550    | <i>Desi</i>      | Ca_Desig_denovo              | 19315481                       | (C/G)       |
| 42956       | CadSNP18551    | <i>Desi</i>      | Ca_Desig_denovo              | 19316927                       | (T/A)       |
| 42957       | CadSNP18552    | <i>Desi</i>      | Ca_Desig_denovo              | 19323056                       | (T/C)       |
| 42958       | CadSNP18553    | <i>Desi</i>      | Ca_Desig_denovo              | 19324156                       | (C/G)       |
| 42959       | CadSNP18554    | <i>Desi</i>      | Ca_Desig_denovo              | 19332882                       | (C/A)       |
| 42960       | CadSNP18555    | <i>Desi</i>      | Ca_Desig_denovo              | 19344763                       | (T/A)       |
| 42961       | CadSNP18556    | <i>Desi</i>      | Ca_Desig_denovo              | 19344793                       | (G/A)       |
| 42962       | CadSNP18557    | <i>Desi</i>      | Ca_Desig_denovo              | 19345132                       | (A/G)       |
| 42963       | CadSNP18558    | <i>Desi</i>      | Ca_Desig_denovo              | 19345203                       | (A/C)       |
| 42964       | CadSNP18559    | <i>Desi</i>      | Ca_Desig_denovo              | 19345595                       | (C/T)       |
| 42965       | CadSNP18560    | <i>Desi</i>      | Ca_Desig_denovo              | 19345625                       | (T/C)       |
| 42966       | CadSNP18561    | <i>Desi</i>      | Ca_Desig_denovo              | 19349686                       | (G/A)       |
| 42967       | CadSNP18562    | <i>Desi</i>      | Ca_Desig_denovo              | 19352492                       | (T/C)       |
| 42968       | CadSNP18563    | <i>Desi</i>      | Ca_Desig_denovo              | 19356205                       | (C/A)       |
| 42969       | CadSNP18564    | <i>Desi</i>      | Ca_Desig_denovo              | 19356253                       | (T/C)       |
| 42970       | CadSNP18565    | <i>Desi</i>      | Ca_Desig_denovo              | 19361933                       | (C/T)       |
| 42971       | CadSNP18566    | <i>Desi</i>      | Ca_Desig_denovo              | 19362002                       | (C/A)       |
| 42972       | CadSNP18567    | <i>Desi</i>      | Ca_Desig_denovo              | 19362004                       | (C/G)       |
| 42973       | CadSNP18568    | <i>Desi</i>      | Ca_Desig_denovo              | 19376009                       | (T/C)       |
| 42974       | CadSNP18569    | <i>Desi</i>      | Ca_Desig_denovo              | 19376079                       | (C/A)       |
| 42975       | CadSNP18570    | <i>Desi</i>      | Ca_Desig_denovo              | 19393793                       | (A/C)       |
| 42976       | CadSNP18571    | <i>Desi</i>      | Ca_Desig_denovo              | 19397218                       | (G/C)       |
| 42977       | CadSNP18572    | <i>Desi</i>      | Ca_Desig_denovo              | 19401041                       | (T/C)       |

| <b>S.N.</b> | <b>SNP IDs</b> | <b>Cultivars</b> | <b>Chromosomes/scaffolds</b> | <b>Physical positions (bp)</b> | <b>SNPs</b> |
|-------------|----------------|------------------|------------------------------|--------------------------------|-------------|
| 42978       | CadSNP18573    | <i>Desi</i>      | Ca_Desig_denovo              | 19404288                       | (T/C)       |
| 42979       | CadSNP18574    | <i>Desi</i>      | Ca_Desig_denovo              | 19405469                       | (T/G)       |
| 42980       | CadSNP18575    | <i>Desi</i>      | Ca_Desig_denovo              | 19405582                       | (A/T)       |
| 42981       | CadSNP18576    | <i>Desi</i>      | Ca_Desig_denovo              | 19405621                       | (A/G)       |
| 42982       | CadSNP18577    | <i>Desi</i>      | Ca_Desig_denovo              | 19413506                       | (G/C)       |
| 42983       | CadSNP18578    | <i>Desi</i>      | Ca_Desig_denovo              | 19413902                       | (A/C)       |
| 42984       | CadSNP18579    | <i>Desi</i>      | Ca_Desig_denovo              | 19415294                       | (A/T)       |
| 42985       | CadSNP18580    | <i>Desi</i>      | Ca_Desig_denovo              | 19416137                       | (A/G)       |
| 42986       | CadSNP18581    | <i>Desi</i>      | Ca_Desig_denovo              | 19422266                       | (T/G)       |
| 42987       | CadSNP18582    | <i>Desi</i>      | Ca_Desig_denovo              | 19427080                       | (G/A)       |
| 42988       | CadSNP18583    | <i>Desi</i>      | Ca_Desig_denovo              | 19433992                       | (A/G)       |
| 42989       | CadSNP18584    | <i>Desi</i>      | Ca_Desig_denovo              | 19434023                       | (T/G)       |
| 42990       | CadSNP18585    | <i>Desi</i>      | Ca_Desig_denovo              | 19438581                       | (A/C)       |
| 42991       | CadSNP18586    | <i>Desi</i>      | Ca_Desig_denovo              | 19438582                       | (G/A)       |
| 42992       | CadSNP18587    | <i>Desi</i>      | Ca_Desig_denovo              | 19439260                       | (C/T)       |
| 42993       | CadSNP18588    | <i>Desi</i>      | Ca_Desig_denovo              | 19439312                       | (G/A)       |
| 42994       | CadSNP18589    | <i>Desi</i>      | Ca_Desig_denovo              | 19442221                       | (A/C)       |
| 42995       | CadSNP18590    | <i>Desi</i>      | Ca_Desig_denovo              | 19442285                       | (C/T)       |
| 42996       | CadSNP18591    | <i>Desi</i>      | Ca_Desig_denovo              | 19444519                       | (T/G)       |
| 42997       | CadSNP18592    | <i>Desi</i>      | Ca_Desig_denovo              | 19447996                       | (C/T)       |
| 42998       | CadSNP18593    | <i>Desi</i>      | Ca_Desig_denovo              | 19455279                       | (T/C)       |
| 42999       | CadSNP18594    | <i>Desi</i>      | Ca_Desig_denovo              | 19460258                       | (A/G)       |
| 43000       | CadSNP18595    | <i>Desi</i>      | Ca_Desig_denovo              | 19460318                       | (G/A)       |
| 43001       | CadSNP18596    | <i>Desi</i>      | Ca_Desig_denovo              | 19460875                       | (T/G)       |
| 43002       | CadSNP18597    | <i>Desi</i>      | Ca_Desig_denovo              | 19467327                       | (A/G)       |
| 43003       | CadSNP18598    | <i>Desi</i>      | Ca_Desig_denovo              | 19467472                       | (G/A)       |
| 43004       | CadSNP18599    | <i>Desi</i>      | Ca_Desig_denovo              | 19467477                       | (G/A)       |
| 43005       | CadSNP18600    | <i>Desi</i>      | Ca_Desig_denovo              | 19474073                       | (A/G)       |
| 43006       | CadSNP18601    | <i>Desi</i>      | Ca_Desig_denovo              | 19474086                       | (C/T)       |
| 43007       | CadSNP18602    | <i>Desi</i>      | Ca_Desig_denovo              | 19478492                       | (C/G)       |
| 43008       | CadSNP18603    | <i>Desi</i>      | Ca_Desig_denovo              | 19478514                       | (T/G)       |
| 43009       | CadSNP18604    | <i>Desi</i>      | Ca_Desig_denovo              | 19479476                       | (A/G)       |
| 43010       | CadSNP18605    | <i>Desi</i>      | Ca_Desig_denovo              | 19491538                       | (G/T)       |
| 43011       | CadSNP18606    | <i>Desi</i>      | Ca_Desig_denovo              | 19497307                       | (G/A)       |
| 43012       | CadSNP18607    | <i>Desi</i>      | Ca_Desig_denovo              | 19497352                       | (G/A)       |
| 43013       | CadSNP18608    | <i>Desi</i>      | Ca_Desig_denovo              | 19502112                       | (C/T)       |
| 43014       | CadSNP18609    | <i>Desi</i>      | Ca_Desig_denovo              | 19502166                       | (C/T)       |
| 43015       | CadSNP18610    | <i>Desi</i>      | Ca_Desig_denovo              | 19509950                       | (C/T)       |

| <b>S.N.</b> | <b>SNP IDs</b> | <b>Cultivars</b> | <b>Chromosomes/scaffolds</b> | <b>Physical positions (bp)</b> | <b>SNPs</b> |
|-------------|----------------|------------------|------------------------------|--------------------------------|-------------|
| 43016       | CadSNP18611    | <i>Desi</i>      | Ca_Desig_denovo              | 19511241                       | (T/C)       |
| 43017       | CadSNP18612    | <i>Desi</i>      | Ca_Desig_denovo              | 19511265                       | (A/G)       |
| 43018       | CadSNP18613    | <i>Desi</i>      | Ca_Desig_denovo              | 19513717                       | (C/A)       |
| 43019       | CadSNP18614    | <i>Desi</i>      | Ca_Desig_denovo              | 19517026                       | (T/C)       |
| 43020       | CadSNP18615    | <i>Desi</i>      | Ca_Desig_denovo              | 19524080                       | (C/G)       |
| 43021       | CadSNP18616    | <i>Desi</i>      | Ca_Desig_denovo              | 19524125                       | (G/A)       |
| 43022       | CadSNP18617    | <i>Desi</i>      | Ca_Desig_denovo              | 19526065                       | (C/G)       |
| 43023       | CadSNP18618    | <i>Desi</i>      | Ca_Desig_denovo              | 19532455                       | (A/G)       |
| 43024       | CadSNP18619    | <i>Desi</i>      | Ca_Desig_denovo              | 19544922                       | (T/C)       |
| 43025       | CadSNP18620    | <i>Desi</i>      | Ca_Desig_denovo              | 19551170                       | (C/T)       |
| 43026       | CadSNP18621    | <i>Desi</i>      | Ca_Desig_denovo              | 19551179                       | (G/C)       |
| 43027       | CadSNP18622    | <i>Desi</i>      | Ca_Desig_denovo              | 19551625                       | (C/G)       |
| 43028       | CadSNP18623    | <i>Desi</i>      | Ca_Desig_denovo              | 19551639                       | (G/T)       |
| 43029       | CadSNP18624    | <i>Desi</i>      | Ca_Desig_denovo              | 19552580                       | (C/T)       |
| 43030       | CadSNP18625    | <i>Desi</i>      | Ca_Desig_denovo              | 19552591                       | (T/C)       |
| 43031       | CadSNP18626    | <i>Desi</i>      | Ca_Desig_denovo              | 19559966                       | (C/A)       |
| 43032       | CadSNP18627    | <i>Desi</i>      | Ca_Desig_denovo              | 19559977                       | (A/C)       |
| 43033       | CadSNP18628    | <i>Desi</i>      | Ca_Desig_denovo              | 19560542                       | (G/A)       |
| 43034       | CadSNP18629    | <i>Desi</i>      | Ca_Desig_denovo              | 19560584                       | (A/G)       |
| 43035       | CadSNP18630    | <i>Desi</i>      | Ca_Desig_denovo              | 19562284                       | (T/G)       |
| 43036       | CadSNP18631    | <i>Desi</i>      | Ca_Desig_denovo              | 19562697                       | (T/C)       |
| 43037       | CadSNP18632    | <i>Desi</i>      | Ca_Desig_denovo              | 19568525                       | (A/C)       |
| 43038       | CadSNP18633    | <i>Desi</i>      | Ca_Desig_denovo              | 19568538                       | (C/T)       |
| 43039       | CadSNP18634    | <i>Desi</i>      | Ca_Desig_denovo              | 19572549                       | (C/G)       |
| 43040       | CadSNP18635    | <i>Desi</i>      | Ca_Desig_denovo              | 19572587                       | (A/G)       |
| 43041       | CadSNP18636    | <i>Desi</i>      | Ca_Desig_denovo              | 19573246                       | (C/T)       |
| 43042       | CadSNP18637    | <i>Desi</i>      | Ca_Desig_denovo              | 19577116                       | (C/A)       |
| 43043       | CadSNP18638    | <i>Desi</i>      | Ca_Desig_denovo              | 19577119                       | (G/C)       |
| 43044       | CadSNP18639    | <i>Desi</i>      | Ca_Desig_denovo              | 19580278                       | (C/G)       |
| 43045       | CadSNP18640    | <i>Desi</i>      | Ca_Desig_denovo              | 19581441                       | (C/T)       |
| 43046       | CadSNP18641    | <i>Desi</i>      | Ca_Desig_denovo              | 19582289                       | (T/C)       |
| 43047       | CadSNP18642    | <i>Desi</i>      | Ca_Desig_denovo              | 19585335                       | (A/C)       |
| 43048       | CadSNP18643    | <i>Desi</i>      | Ca_Desig_denovo              | 19586091                       | (A/G)       |
| 43049       | CadSNP18644    | <i>Desi</i>      | Ca_Desig_denovo              | 19586116                       | (A/C)       |
| 43050       | CadSNP18645    | <i>Desi</i>      | Ca_Desig_denovo              | 19594774                       | (C/G)       |
| 43051       | CadSNP18646    | <i>Desi</i>      | Ca_Desig_denovo              | 19594822                       | (C/T)       |
| 43052       | CadSNP18647    | <i>Desi</i>      | Ca_Desig_denovo              | 19602119                       | (C/G)       |
| 43053       | CadSNP18648    | <i>Desi</i>      | Ca_Desig_denovo              | 19602155                       | (G/A)       |

| <b>S.N.</b> | <b>SNP IDs</b> | <b>Cultivars</b> | <b>Chromosomes/scaffolds</b> | <b>Physical positions (bp)</b> | <b>SNPs</b> |
|-------------|----------------|------------------|------------------------------|--------------------------------|-------------|
| 43054       | CadSNP18649    | <i>Desi</i>      | Ca_Desig_denovo              | 19607692                       | (A/G)       |
| 43055       | CadSNP18650    | <i>Desi</i>      | Ca_Desig_denovo              | 19619329                       | (A/G)       |
| 43056       | CadSNP18651    | <i>Desi</i>      | Ca_Desig_denovo              | 19622541                       | (G/A)       |
| 43057       | CadSNP18652    | <i>Desi</i>      | Ca_Desig_denovo              | 19631021                       | (G/A)       |
| 43058       | CadSNP18653    | <i>Desi</i>      | Ca_Desig_denovo              | 19631024                       | (C/T)       |
| 43059       | CadSNP18654    | <i>Desi</i>      | Ca_Desig_denovo              | 19634641                       | (T/C)       |
| 43060       | CadSNP18655    | <i>Desi</i>      | Ca_Desig_denovo              | 19634692                       | (T/C)       |
| 43061       | CadSNP18656    | <i>Desi</i>      | Ca_Desig_denovo              | 19637348                       | (T/C)       |
| 43062       | CadSNP18657    | <i>Desi</i>      | Ca_Desig_denovo              | 19638811                       | (A/C)       |
| 43063       | CadSNP18658    | <i>Desi</i>      | Ca_Desig_denovo              | 19639601                       | (G/A)       |
| 43064       | CadSNP18659    | <i>Desi</i>      | Ca_Desig_denovo              | 19643025                       | (G/A)       |
| 43065       | CadSNP18660    | <i>Desi</i>      | Ca_Desig_denovo              | 19643839                       | (C/T)       |
| 43066       | CadSNP18661    | <i>Desi</i>      | Ca_Desig_denovo              | 19645637                       | (G/A)       |
| 43067       | CadSNP18662    | <i>Desi</i>      | Ca_Desig_denovo              | 19645676                       | (A/G)       |
| 43068       | CadSNP18663    | <i>Desi</i>      | Ca_Desig_denovo              | 19648982                       | (G/C)       |
| 43069       | CadSNP18664    | <i>Desi</i>      | Ca_Desig_denovo              | 19648991                       | (C/G)       |
| 43070       | CadSNP18665    | <i>Desi</i>      | Ca_Desig_denovo              | 19650909                       | (A/G)       |
| 43071       | CadSNP18666    | <i>Desi</i>      | Ca_Desig_denovo              | 19659140                       | (T/G)       |
| 43072       | CadSNP18667    | <i>Desi</i>      | Ca_Desig_denovo              | 19665761                       | (C/T)       |
| 43073       | CadSNP18668    | <i>Desi</i>      | Ca_Desig_denovo              | 19665773                       | (C/G)       |
| 43074       | CadSNP18669    | <i>Desi</i>      | Ca_Desig_denovo              | 19667023                       | (A/G)       |
| 43075       | CadSNP18670    | <i>Desi</i>      | Ca_Desig_denovo              | 19667640                       | (A/C)       |
| 43076       | CadSNP18671    | <i>Desi</i>      | Ca_Desig_denovo              | 19668765                       | (A/C)       |
| 43077       | CadSNP18672    | <i>Desi</i>      | Ca_Desig_denovo              | 19668846                       | (G/A)       |
| 43078       | CadSNP18673    | <i>Desi</i>      | Ca_Desig_denovo              | 19669821                       | (C/T)       |
| 43079       | CadSNP18674    | <i>Desi</i>      | Ca_Desig_denovo              | 19669839                       | (C/G)       |
| 43080       | CadSNP18675    | <i>Desi</i>      | Ca_Desig_denovo              | 19673696                       | (A/G)       |
| 43081       | CadSNP18676    | <i>Desi</i>      | Ca_Desig_denovo              | 19673699                       | (G/T)       |
| 43082       | CadSNP18677    | <i>Desi</i>      | Ca_Desig_denovo              | 19674369                       | (C/T)       |
| 43083       | CadSNP18678    | <i>Desi</i>      | Ca_Desig_denovo              | 19676752                       | (A/C)       |
| 43084       | CadSNP18679    | <i>Desi</i>      | Ca_Desig_denovo              | 19676755                       | (T/A)       |
| 43085       | CadSNP18680    | <i>Desi</i>      | Ca_Desig_denovo              | 19677250                       | (A/G)       |
| 43086       | CadSNP18681    | <i>Desi</i>      | Ca_Desig_denovo              | 19677268                       | (C/T)       |
| 43087       | CadSNP18682    | <i>Desi</i>      | Ca_Desig_denovo              | 19679517                       | (G/T)       |
| 43088       | CadSNP18683    | <i>Desi</i>      | Ca_Desig_denovo              | 19688883                       | (G/C)       |
| 43089       | CadSNP18684    | <i>Desi</i>      | Ca_Desig_denovo              | 19688895                       | (A/G)       |
| 43090       | CadSNP18685    | <i>Desi</i>      | Ca_Desig_denovo              | 19690459                       | (T/C)       |
| 43091       | CadSNP18686    | <i>Desi</i>      | Ca_Desig_denovo              | 19695379                       | (G/C)       |



| <b>S.N.</b> | <b>SNP IDs</b> | <b>Cultivars</b> | <b>Chromosomes/scaffolds</b> | <b>Physical positions (bp)</b> | <b>SNPs</b> |
|-------------|----------------|------------------|------------------------------|--------------------------------|-------------|
| 43092       | CadSNP18687    | <i>Desi</i>      | Ca_Desig_denovo              | 19695421                       | (G/C)       |
| 43093       | CadSNP18688    | <i>Desi</i>      | Ca_Desig_denovo              | 19696945                       | (G/C)       |
| 43094       | CadSNP18689    | <i>Desi</i>      | Ca_Desig_denovo              | 19704741                       | (G/T)       |
| 43095       | CadSNP18690    | <i>Desi</i>      | Ca_Desig_denovo              | 19704747                       | (C/T)       |
| 43096       | CadSNP18691    | <i>Desi</i>      | Ca_Desig_denovo              | 19707073                       | (T/G)       |
| 43097       | CadSNP18692    | <i>Desi</i>      | Ca_Desig_denovo              | 19708324                       | (G/C)       |
| 43098       | CadSNP18693    | <i>Desi</i>      | Ca_Desig_denovo              | 19708327                       | (T/G)       |
| 43099       | CadSNP18694    | <i>Desi</i>      | Ca_Desig_denovo              | 19720164                       | (A/C)       |
| 43100       | CadSNP18695    | <i>Desi</i>      | Ca_Desig_denovo              | 19721239                       | (C/T)       |
| 43101       | CadSNP18696    | <i>Desi</i>      | Ca_Desig_denovo              | 19721261                       | (C/A)       |
| 43102       | CadSNP18697    | <i>Desi</i>      | Ca_Desig_denovo              | 19724567                       | (T/G)       |
| 43103       | CadSNP18698    | <i>Desi</i>      | Ca_Desig_denovo              | 19724571                       | (A/C)       |
| 43104       | CadSNP18699    | <i>Desi</i>      | Ca_Desig_denovo              | 19732783                       | (C/T)       |
| 43105       | CadSNP18700    | <i>Desi</i>      | Ca_Desig_denovo              | 19734588                       | (T/G)       |
| 43106       | CadSNP18701    | <i>Desi</i>      | Ca_Desig_denovo              | 19739073                       | (G/A)       |
| 43107       | CadSNP18702    | <i>Desi</i>      | Ca_Desig_denovo              | 19739649                       | (G/A)       |
| 43108       | CadSNP18703    | <i>Desi</i>      | Ca_Desig_denovo              | 19739702                       | (T/C)       |
| 43109       | CadSNP18704    | <i>Desi</i>      | Ca_Desig_denovo              | 19745122                       | (A/G)       |
| 43110       | CadSNP18705    | <i>Desi</i>      | Ca_Desig_denovo              | 19745188                       | (C/G)       |
| 43111       | CadSNP18706    | <i>Desi</i>      | Ca_Desig_denovo              | 19747754                       | (T/C)       |
| 43112       | CadSNP18707    | <i>Desi</i>      | Ca_Desig_denovo              | 19750082                       | (T/C)       |
| 43113       | CadSNP18708    | <i>Desi</i>      | Ca_Desig_denovo              | 19752430                       | (A/G)       |
| 43114       | CadSNP18709    | <i>Desi</i>      | Ca_Desig_denovo              | 19755629                       | (T/G)       |
| 43115       | CadSNP18710    | <i>Desi</i>      | Ca_Desig_denovo              | 19760387                       | (G/C)       |
| 43116       | CadSNP18711    | <i>Desi</i>      | Ca_Desig_denovo              | 19770529                       | (A/G)       |
| 43117       | CadSNP18712    | <i>Desi</i>      | Ca_Desig_denovo              | 19770584                       | (A/G)       |
| 43118       | CadSNP18713    | <i>Desi</i>      | Ca_Desig_denovo              | 19772128                       | (T/C)       |
| 43119       | CadSNP18714    | <i>Desi</i>      | Ca_Desig_denovo              | 19779548                       | (C/A)       |
| 43120       | CadSNP18715    | <i>Desi</i>      | Ca_Desig_denovo              | 19779608                       | (T/G)       |
| 43121       | CadSNP18716    | <i>Desi</i>      | Ca_Desig_denovo              | 19784609                       | (T/C)       |
| 43122       | CadSNP18717    | <i>Desi</i>      | Ca_Desig_denovo              | 19784627                       | (A/G)       |
| 43123       | CadSNP18718    | <i>Desi</i>      | Ca_Desig_denovo              | 19785062                       | (G/A)       |
| 43124       | CadSNP18719    | <i>Desi</i>      | Ca_Desig_denovo              | 19785071                       | (G/A)       |
| 43125       | CadSNP18720    | <i>Desi</i>      | Ca_Desig_denovo              | 19793681                       | (T/C)       |
| 43126       | CadSNP18721    | <i>Desi</i>      | Ca_Desig_denovo              | 19793708                       | (C/G)       |
| 43127       | CadSNP18722    | <i>Desi</i>      | Ca_Desig_denovo              | 19795801                       | (A/G)       |
| 43128       | CadSNP18723    | <i>Desi</i>      | Ca_Desig_denovo              | 19797711                       | (C/T)       |
| 43129       | CadSNP18724    | <i>Desi</i>      | Ca_Desig_denovo              | 19805275                       | (A/G)       |

| <b>S.N.</b> | <b>SNP IDs</b> | <b>Cultivars</b> | <b>Chromosomes/scaffolds</b> | <b>Physical positions (bp)</b> | <b>SNPs</b> |
|-------------|----------------|------------------|------------------------------|--------------------------------|-------------|
| 43130       | CadSNP18725    | <i>Desi</i>      | Ca_Desig_denovo              | 19811624                       | (G/T)       |
| 43131       | CadSNP18726    | <i>Desi</i>      | Ca_Desig_denovo              | 19811627                       | (A/G)       |
| 43132       | CadSNP18727    | <i>Desi</i>      | Ca_Desig_denovo              | 19812493                       | (C/T)       |
| 43133       | CadSNP18728    | <i>Desi</i>      | Ca_Desig_denovo              | 19812655                       | (A/G)       |
| 43134       | CadSNP18729    | <i>Desi</i>      | Ca_Desig_denovo              | 19812714                       | (G/A)       |
| 43135       | CadSNP18730    | <i>Desi</i>      | Ca_Desig_denovo              | 19816832                       | (C/T)       |
| 43136       | CadSNP18731    | <i>Desi</i>      | Ca_Desig_denovo              | 19816871                       | (T/G)       |
| 43137       | CadSNP18732    | <i>Desi</i>      | Ca_Desig_denovo              | 19817995                       | (A/G)       |
| 43138       | CadSNP18733    | <i>Desi</i>      | Ca_Desig_denovo              | 19819982                       | (C/T)       |
| 43139       | CadSNP18734    | <i>Desi</i>      | Ca_Desig_denovo              | 19819999                       | (G/T)       |
| 43140       | CadSNP18735    | <i>Desi</i>      | Ca_Desig_denovo              | 19820036                       | (A/G)       |
| 43141       | CadSNP18736    | <i>Desi</i>      | Ca_Desig_denovo              | 19821034                       | (C/A)       |
| 43142       | CadSNP18737    | <i>Desi</i>      | Ca_Desig_denovo              | 19827520                       | (T/C)       |
| 43143       | CadSNP18738    | <i>Desi</i>      | Ca_Desig_denovo              | 19830841                       | (A/G)       |
| 43144       | CadSNP18739    | <i>Desi</i>      | Ca_Desig_denovo              | 19830846                       | (G/A)       |
| 43145       | CadSNP18740    | <i>Desi</i>      | Ca_Desig_denovo              | 19832856                       | (C/G)       |
| 43146       | CadSNP18741    | <i>Desi</i>      | Ca_Desig_denovo              | 19833601                       | (T/A)       |
| 43147       | CadSNP18742    | <i>Desi</i>      | Ca_Desig_denovo              | 19833608                       | (A/G)       |
| 43148       | CadSNP18743    | <i>Desi</i>      | Ca_Desig_denovo              | 19837001                       | (G/A)       |
| 43149       | CadSNP18744    | <i>Desi</i>      | Ca_Desig_denovo              | 19838409                       | (G/C)       |
| 43150       | CadSNP18745    | <i>Desi</i>      | Ca_Desig_denovo              | 19838421                       | (T/C)       |
| 43151       | CadSNP18746    | <i>Desi</i>      | Ca_Desig_denovo              | 19844440                       | (T/C)       |
| 43152       | CadSNP18747    | <i>Desi</i>      | Ca_Desig_denovo              | 19848601                       | (A/G)       |
| 43153       | CadSNP18748    | <i>Desi</i>      | Ca_Desig_denovo              | 19858982                       | (G/A)       |
| 43154       | CadSNP18749    | <i>Desi</i>      | Ca_Desig_denovo              | 19860067                       | (C/T)       |
| 43155       | CadSNP18750    | <i>Desi</i>      | Ca_Desig_denovo              | 19860137                       | (A/G)       |
| 43156       | CadSNP18751    | <i>Desi</i>      | Ca_Desig_denovo              | 19865259                       | (A/G)       |
| 43157       | CadSNP18752    | <i>Desi</i>      | Ca_Desig_denovo              | 19869107                       | (C/T)       |
| 43158       | CadSNP18753    | <i>Desi</i>      | Ca_Desig_denovo              | 19869596                       | (A/G)       |
| 43159       | CadSNP18754    | <i>Desi</i>      | Ca_Desig_denovo              | 19879840                       | (C/G)       |
| 43160       | CadSNP18755    | <i>Desi</i>      | Ca_Desig_denovo              | 19887711                       | (C/T)       |
| 43161       | CadSNP18756    | <i>Desi</i>      | Ca_Desig_denovo              | 19889628                       | (C/G)       |
| 43162       | CadSNP18757    | <i>Desi</i>      | Ca_Desig_denovo              | 19892915                       | (G/A)       |
| 43163       | CadSNP18758    | <i>Desi</i>      | Ca_Desig_denovo              | 19893834                       | (C/G)       |
| 43164       | CadSNP18759    | <i>Desi</i>      | Ca_Desig_denovo              | 19901881                       | (A/C)       |
| 43165       | CadSNP18760    | <i>Desi</i>      | Ca_Desig_denovo              | 19903323                       | (A/T)       |
| 43166       | CadSNP18761    | <i>Desi</i>      | Ca_Desig_denovo              | 19903366                       | (G/C)       |
| 43167       | CadSNP18762    | <i>Desi</i>      | Ca_Desig_denovo              | 19906018                       | (C/G)       |

| <b>S.N.</b> | <b>SNP IDs</b> | <b>Cultivars</b> | <b>Chromosomes/scaffolds</b> | <b>Physical positions (bp)</b> | <b>SNPs</b> |
|-------------|----------------|------------------|------------------------------|--------------------------------|-------------|
| 43168       | CadSNP18763    | <i>Desi</i>      | Ca_Desig_denovo              | 19906021                       | (G/A)       |
| 43169       | CadSNP18764    | <i>Desi</i>      | Ca_Desig_denovo              | 19906044                       | (G/C)       |
| 43170       | CadSNP18765    | <i>Desi</i>      | Ca_Desig_denovo              | 19917012                       | (T/C)       |
| 43171       | CadSNP18766    | <i>Desi</i>      | Ca_Desig_denovo              | 19917057                       | (G/A)       |
| 43172       | CadSNP18767    | <i>Desi</i>      | Ca_Desig_denovo              | 19919221                       | (C/T)       |
| 43173       | CadSNP18768    | <i>Desi</i>      | Ca_Desig_denovo              | 19920120                       | (C/G)       |
| 43174       | CadSNP18769    | <i>Desi</i>      | Ca_Desig_denovo              | 19922293                       | (C/T)       |
| 43175       | CadSNP18770    | <i>Desi</i>      | Ca_Desig_denovo              | 19938394                       | (A/C)       |
| 43176       | CadSNP18771    | <i>Desi</i>      | Ca_Desig_denovo              | 19939984                       | (G/A)       |
| 43177       | CadSNP18772    | <i>Desi</i>      | Ca_Desig_denovo              | 19941205                       | (T/C)       |
| 43178       | CadSNP18773    | <i>Desi</i>      | Ca_Desig_denovo              | 19941958                       | (C/T)       |
| 43179       | CadSNP18774    | <i>Desi</i>      | Ca_Desig_denovo              | 19943126                       | (T/C)       |
| 43180       | CadSNP18775    | <i>Desi</i>      | Ca_Desig_denovo              | 19948982                       | (A/G)       |
| 43181       | CadSNP18776    | <i>Desi</i>      | Ca_Desig_denovo              | 19948988                       | (C/T)       |
| 43182       | CadSNP18777    | <i>Desi</i>      | Ca_Desig_denovo              | 19952382                       | (T/C)       |
| 43183       | CadSNP18778    | <i>Desi</i>      | Ca_Desig_denovo              | 19952394                       | (G/T)       |
| 43184       | CadSNP18779    | <i>Desi</i>      | Ca_Desig_denovo              | 19954753                       | (C/T)       |
| 43185       | CadSNP18780    | <i>Desi</i>      | Ca_Desig_denovo              | 19960820                       | (G/A)       |
| 43186       | CadSNP18781    | <i>Desi</i>      | Ca_Desig_denovo              | 19965113                       | (G/A)       |
| 43187       | CadSNP18782    | <i>Desi</i>      | Ca_Desig_denovo              | 19967017                       | (T/C)       |
| 43188       | CadSNP18783    | <i>Desi</i>      | Ca_Desig_denovo              | 19969077                       | (C/G)       |
| 43189       | CadSNP18784    | <i>Desi</i>      | Ca_Desig_denovo              | 19972504                       | (T/A)       |
| 43190       | CadSNP18785    | <i>Desi</i>      | Ca_Desig_denovo              | 19972567                       | (T/G)       |
| 43191       | CadSNP18786    | <i>Desi</i>      | Ca_Desig_denovo              | 19974268                       | (A/C)       |
| 43192       | CadSNP18787    | <i>Desi</i>      | Ca_Desig_denovo              | 19974592                       | (A/G)       |
| 43193       | CadSNP18788    | <i>Desi</i>      | Ca_Desig_denovo              | 19974598                       | (C/A)       |
| 43194       | CadSNP18789    | <i>Desi</i>      | Ca_Desig_denovo              | 19977743                       | (G/C)       |
| 43195       | CadSNP18790    | <i>Desi</i>      | Ca_Desig_denovo              | 19994427                       | (A/G)       |
| 43196       | CadSNP18791    | <i>Desi</i>      | Ca_Desig_denovo              | 19994437                       | (T/C)       |
| 43197       | CadSNP18792    | <i>Desi</i>      | Ca_Desig_denovo              | 19996154                       | (C/A)       |
| 43198       | CadSNP18793    | <i>Desi</i>      | Ca_Desig_denovo              | 19996163                       | (C/T)       |
| 43199       | CadSNP18794    | <i>Desi</i>      | Ca_Desig_denovo              | 19999411                       | (A/G)       |
| 43200       | CadSNP18795    | <i>Desi</i>      | Ca_Desig_denovo              | 20000686                       | (C/T)       |
| 43201       | CadSNP18796    | <i>Desi</i>      | Ca_Desig_denovo              | 20000701                       | (C/T)       |
| 43202       | CadSNP18797    | <i>Desi</i>      | Ca_Desig_denovo              | 20014733                       | (A/T)       |
| 43203       | CadSNP18798    | <i>Desi</i>      | Ca_Desig_denovo              | 20014757                       | (T/C)       |
| 43204       | CadSNP18799    | <i>Desi</i>      | Ca_Desig_denovo              | 20017516                       | (C/T)       |
| 43205       | CadSNP18800    | <i>Desi</i>      | Ca_Desig_denovo              | 20017736                       | (G/C)       |

| <b>S.N.</b> | <b>SNP IDs</b> | <b>Cultivars</b> | <b>Chromosomes/scaffolds</b> | <b>Physical positions (bp)</b> | <b>SNPs</b> |
|-------------|----------------|------------------|------------------------------|--------------------------------|-------------|
| 43206       | CadSNP18801    | <i>Desi</i>      | Ca_Desig_denovo              | 20027907                       | (T/G)       |
| 43207       | CadSNP18802    | <i>Desi</i>      | Ca_Desig_denovo              | 20028135                       | (C/T)       |
| 43208       | CadSNP18803    | <i>Desi</i>      | Ca_Desig_denovo              | 20028191                       | (C/T)       |
| 43209       | CadSNP18804    | <i>Desi</i>      | Ca_Desig_denovo              | 20030088                       | (T/C)       |
| 43210       | CadSNP18805    | <i>Desi</i>      | Ca_Desig_denovo              | 20031284                       | (A/C)       |
| 43211       | CadSNP18806    | <i>Desi</i>      | Ca_Desig_denovo              | 20032831                       | (C/G)       |
| 43212       | CadSNP18807    | <i>Desi</i>      | Ca_Desig_denovo              | 20033759                       | (G/A)       |
| 43213       | CadSNP18808    | <i>Desi</i>      | Ca_Desig_denovo              | 20037363                       | (C/A)       |
| 43214       | CadSNP18809    | <i>Desi</i>      | Ca_Desig_denovo              | 20037375                       | (G/A)       |
| 43215       | CadSNP18810    | <i>Desi</i>      | Ca_Desig_denovo              | 20046958                       | (G/C)       |
| 43216       | CadSNP18811    | <i>Desi</i>      | Ca_Desig_denovo              | 20046976                       | (A/G)       |
| 43217       | CadSNP18812    | <i>Desi</i>      | Ca_Desig_denovo              | 20056511                       | (C/G)       |
| 43218       | CadSNP18813    | <i>Desi</i>      | Ca_Desig_denovo              | 20056550                       | (A/G)       |
| 43219       | CadSNP18814    | <i>Desi</i>      | Ca_Desig_denovo              | 20065714                       | (A/C)       |
| 43220       | CadSNP18815    | <i>Desi</i>      | Ca_Desig_denovo              | 20066608                       | (T/G)       |
| 43221       | CadSNP18816    | <i>Desi</i>      | Ca_Desig_denovo              | 20069366                       | (G/T)       |
| 43222       | CadSNP18817    | <i>Desi</i>      | Ca_Desig_denovo              | 20069393                       | (C/T)       |
| 43223       | CadSNP18818    | <i>Desi</i>      | Ca_Desig_denovo              | 20071749                       | (G/A)       |
| 43224       | CadSNP18819    | <i>Desi</i>      | Ca_Desig_denovo              | 20071757                       | (C/G)       |
| 43225       | CadSNP18820    | <i>Desi</i>      | Ca_Desig_denovo              | 20073176                       | (C/T)       |
| 43226       | CadSNP18821    | <i>Desi</i>      | Ca_Desig_denovo              | 20075708                       | (C/G)       |
| 43227       | CadSNP18822    | <i>Desi</i>      | Ca_Desig_denovo              | 20079018                       | (A/C)       |
| 43228       | CadSNP18823    | <i>Desi</i>      | Ca_Desig_denovo              | 20079024                       | (A/G)       |
| 43229       | CadSNP18824    | <i>Desi</i>      | Ca_Desig_denovo              | 20082067                       | (G/C)       |
| 43230       | CadSNP18825    | <i>Desi</i>      | Ca_Desig_denovo              | 20082091                       | (G/A)       |
| 43231       | CadSNP18826    | <i>Desi</i>      | Ca_Desig_denovo              | 20084009                       | (C/T)       |
| 43232       | CadSNP18827    | <i>Desi</i>      | Ca_Desig_denovo              | 20084019                       | (A/G)       |
| 43233       | CadSNP18828    | <i>Desi</i>      | Ca_Desig_denovo              | 20085590                       | (T/C)       |
| 43234       | CadSNP18829    | <i>Desi</i>      | Ca_Desig_denovo              | 20085617                       | (T/C)       |
| 43235       | CadSNP18830    | <i>Desi</i>      | Ca_Desig_denovo              | 20089072                       | (T/C)       |
| 43236       | CadSNP18831    | <i>Desi</i>      | Ca_Desig_denovo              | 20089142                       | (A/G)       |
| 43237       | CadSNP18832    | <i>Desi</i>      | Ca_Desig_denovo              | 20089154                       | (G/C)       |
| 43238       | CadSNP18833    | <i>Desi</i>      | Ca_Desig_denovo              | 20092472                       | (A/G)       |
| 43239       | CadSNP18834    | <i>Desi</i>      | Ca_Desig_denovo              | 20092534                       | (C/T)       |
| 43240       | CadSNP18835    | <i>Desi</i>      | Ca_Desig_denovo              | 20093774                       | (A/C)       |
| 43241       | CadSNP18836    | <i>Desi</i>      | Ca_Desig_denovo              | 20098548                       | (G/A)       |
| 43242       | CadSNP18837    | <i>Desi</i>      | Ca_Desig_denovo              | 20098578                       | (A/G)       |
| 43243       | CadSNP18838    | <i>Desi</i>      | Ca_Desig_denovo              | 20099553                       | (A/G)       |

| <b>S.N.</b> | <b>SNP IDs</b> | <b>Cultivars</b> | <b>Chromosomes/scaffolds</b> | <b>Physical positions (bp)</b> | <b>SNPs</b> |
|-------------|----------------|------------------|------------------------------|--------------------------------|-------------|
| 43244       | CadSNP18839    | <i>Desi</i>      | Ca_Desig_denovo              | 20099586                       | (C/T)       |
| 43245       | CadSNP18840    | <i>Desi</i>      | Ca_Desig_denovo              | 20099744                       | (T/C)       |
| 43246       | CadSNP18841    | <i>Desi</i>      | Ca_Desig_denovo              | 20104972                       | (A/G)       |
| 43247       | CadSNP18842    | <i>Desi</i>      | Ca_Desig_denovo              | 20107882                       | (C/T)       |
| 43248       | CadSNP18843    | <i>Desi</i>      | Ca_Desig_denovo              | 20122395                       | (G/A)       |
| 43249       | CadSNP18844    | <i>Desi</i>      | Ca_Desig_denovo              | 20126056                       | (C/G)       |
| 43250       | CadSNP18845    | <i>Desi</i>      | Ca_Desig_denovo              | 20126068                       | (G/T)       |
| 43251       | CadSNP18846    | <i>Desi</i>      | Ca_Desig_denovo              | 20127870                       | (A/G)       |
| 43252       | CadSNP18847    | <i>Desi</i>      | Ca_Desig_denovo              | 20128282                       | (T/G)       |
| 43253       | CadSNP18848    | <i>Desi</i>      | Ca_Desig_denovo              | 20128317                       | (A/G)       |
| 43254       | CadSNP18849    | <i>Desi</i>      | Ca_Desig_denovo              | 20133581                       | (C/T)       |
| 43255       | CadSNP18850    | <i>Desi</i>      | Ca_Desig_denovo              | 20141020                       | (T/C)       |
| 43256       | CadSNP18851    | <i>Desi</i>      | Ca_Desig_denovo              | 20141024                       | (G/C)       |
| 43257       | CadSNP18852    | <i>Desi</i>      | Ca_Desig_denovo              | 20141045                       | (G/A)       |
| 43258       | CadSNP18853    | <i>Desi</i>      | Ca_Desig_denovo              | 20144368                       | (C/T)       |
| 43259       | CadSNP18854    | <i>Desi</i>      | Ca_Desig_denovo              | 20144388                       | (G/C)       |
| 43260       | CadSNP18855    | <i>Desi</i>      | Ca_Desig_denovo              | 20146799                       | (C/T)       |
| 43261       | CadSNP18856    | <i>Desi</i>      | Ca_Desig_denovo              | 20147254                       | (C/G)       |
| 43262       | CadSNP18857    | <i>Desi</i>      | Ca_Desig_denovo              | 20147260                       | (G/T)       |
| 43263       | CadSNP18858    | <i>Desi</i>      | Ca_Desig_denovo              | 20149413                       | (G/C)       |
| 43264       | CadSNP18859    | <i>Desi</i>      | Ca_Desig_denovo              | 20150813                       | (G/A)       |
| 43265       | CadSNP18860    | <i>Desi</i>      | Ca_Desig_denovo              | 20150818                       | (C/T)       |
| 43266       | CadSNP18861    | <i>Desi</i>      | Ca_Desig_denovo              | 20152462                       | (G/A)       |
| 43267       | CadSNP18862    | <i>Desi</i>      | Ca_Desig_denovo              | 20157353                       | (C/T)       |
| 43268       | CadSNP18863    | <i>Desi</i>      | Ca_Desig_denovo              | 20158531                       | (T/C)       |
| 43269       | CadSNP18864    | <i>Desi</i>      | Ca_Desig_denovo              | 20158552                       | (A/G)       |
| 43270       | CadSNP18865    | <i>Desi</i>      | Ca_Desig_denovo              | 20161764                       | (G/A)       |
| 43271       | CadSNP18866    | <i>Desi</i>      | Ca_Desig_denovo              | 20161784                       | (A/G)       |
| 43272       | CadSNP18867    | <i>Desi</i>      | Ca_Desig_denovo              | 20166883                       | (C/G)       |
| 43273       | CadSNP18868    | <i>Desi</i>      | Ca_Desig_denovo              | 20166907                       | (T/C)       |
| 43274       | CadSNP18869    | <i>Desi</i>      | Ca_Desig_denovo              | 20168698                       | (A/G)       |
| 43275       | CadSNP18870    | <i>Desi</i>      | Ca_Desig_denovo              | 20168721                       | (G/A)       |
| 43276       | CadSNP18871    | <i>Desi</i>      | Ca_Desig_denovo              | 20170862                       | (A/C)       |
| 43277       | CadSNP18872    | <i>Desi</i>      | Ca_Desig_denovo              | 20170864                       | (A/C)       |
| 43278       | CadSNP18873    | <i>Desi</i>      | Ca_Desig_denovo              | 20176611                       | (T/C)       |
| 43279       | CadSNP18874    | <i>Desi</i>      | Ca_Desig_denovo              | 20177942                       | (G/A)       |
| 43280       | CadSNP18875    | <i>Desi</i>      | Ca_Desig_denovo              | 20178011                       | (A/T)       |
| 43281       | CadSNP18876    | <i>Desi</i>      | Ca_Desig_denovo              | 20178675                       | (A/C)       |

| <b>S.N.</b> | <b>SNP IDs</b> | <b>Cultivars</b> | <b>Chromosomes/scaffolds</b> | <b>Physical positions (bp)</b> | <b>SNPs</b> |
|-------------|----------------|------------------|------------------------------|--------------------------------|-------------|
| 43282       | CadSNP18877    | <i>Desi</i>      | Ca_Desig_denovo              | 20178928                       | (G/C)       |
| 43283       | CadSNP18878    | <i>Desi</i>      | Ca_Desig_denovo              | 20178937                       | (G/C)       |
| 43284       | CadSNP18879    | <i>Desi</i>      | Ca_Desig_denovo              | 20180216                       | (C/T)       |
| 43285       | CadSNP18880    | <i>Desi</i>      | Ca_Desig_denovo              | 20185884                       | (C/T)       |
| 43286       | CadSNP18881    | <i>Desi</i>      | Ca_Desig_denovo              | 20188456                       | (G/A)       |
| 43287       | CadSNP18882    | <i>Desi</i>      | Ca_Desig_denovo              | 20191813                       | (G/A)       |
| 43288       | CadSNP18883    | <i>Desi</i>      | Ca_Desig_denovo              | 20193958                       | (C/T)       |
| 43289       | CadSNP18884    | <i>Desi</i>      | Ca_Desig_denovo              | 20193962                       | (C/G)       |
| 43290       | CadSNP18885    | <i>Desi</i>      | Ca_Desig_denovo              | 20195561                       | (G/C)       |
| 43291       | CadSNP18886    | <i>Desi</i>      | Ca_Desig_denovo              | 20204875                       | (C/T)       |
| 43292       | CadSNP18887    | <i>Desi</i>      | Ca_Desig_denovo              | 20204892                       | (C/T)       |
| 43293       | CadSNP18888    | <i>Desi</i>      | Ca_Desig_denovo              | 20205935                       | (T/G)       |
| 43294       | CadSNP18889    | <i>Desi</i>      | Ca_Desig_denovo              | 20209101                       | (T/C)       |
| 43295       | CadSNP18890    | <i>Desi</i>      | Ca_Desig_denovo              | 20220907                       | (C/T)       |
| 43296       | CadSNP18891    | <i>Desi</i>      | Ca_Desig_denovo              | 20220934                       | (T/C)       |
| 43297       | CadSNP18892    | <i>Desi</i>      | Ca_Desig_denovo              | 20221423                       | (G/T)       |
| 43298       | CadSNP18893    | <i>Desi</i>      | Ca_Desig_denovo              | 20230035                       | (T/C)       |
| 43299       | CadSNP18894    | <i>Desi</i>      | Ca_Desig_denovo              | 20230039                       | (A/G)       |
| 43300       | CadSNP18895    | <i>Desi</i>      | Ca_Desig_denovo              | 20237477                       | (G/A)       |
| 43301       | CadSNP18896    | <i>Desi</i>      | Ca_Desig_denovo              | 20237523                       | (C/A)       |
| 43302       | CadSNP18897    | <i>Desi</i>      | Ca_Desig_denovo              | 20244713                       | (A/G)       |
| 43303       | CadSNP18898    | <i>Desi</i>      | Ca_Desig_denovo              | 20244737                       | (A/G)       |
| 43304       | CadSNP18899    | <i>Desi</i>      | Ca_Desig_denovo              | 20244740                       | (G/A)       |
| 43305       | CadSNP18900    | <i>Desi</i>      | Ca_Desig_denovo              | 20245379                       | (A/T)       |
| 43306       | CadSNP18901    | <i>Desi</i>      | Ca_Desig_denovo              | 20245387                       | (T/C)       |
| 43307       | CadSNP18902    | <i>Desi</i>      | Ca_Desig_denovo              | 20245585                       | (A/G)       |
| 43308       | CadSNP18903    | <i>Desi</i>      | Ca_Desig_denovo              | 20245630                       | (A/G)       |
| 43309       | CadSNP18904    | <i>Desi</i>      | Ca_Desig_denovo              | 20254129                       | (A/G)       |
| 43310       | CadSNP18905    | <i>Desi</i>      | Ca_Desig_denovo              | 20254135                       | (A/C)       |
| 43311       | CadSNP18906    | <i>Desi</i>      | Ca_Desig_denovo              | 20255954                       | (T/G)       |
| 43312       | CadSNP18907    | <i>Desi</i>      | Ca_Desig_denovo              | 20261481                       | (C/A)       |
| 43313       | CadSNP18908    | <i>Desi</i>      | Ca_Desig_denovo              | 20261485                       | (G/A)       |
| 43314       | CadSNP18909    | <i>Desi</i>      | Ca_Desig_denovo              | 20263282                       | (A/G)       |
| 43315       | CadSNP18910    | <i>Desi</i>      | Ca_Desig_denovo              | 20265291                       | (A/G)       |
| 43316       | CadSNP18911    | <i>Desi</i>      | Ca_Desig_denovo              | 20270676                       | (C/A)       |
| 43317       | CadSNP18912    | <i>Desi</i>      | Ca_Desig_denovo              | 20270680                       | (A/C)       |
| 43318       | CadSNP18913    | <i>Desi</i>      | Ca_Desig_denovo              | 20271500                       | (T/G)       |
| 43319       | CadSNP18914    | <i>Desi</i>      | Ca_Desig_denovo              | 20271578                       | (C/T)       |

| <b>S.N.</b> | <b>SNP IDs</b> | <b>Cultivars</b> | <b>Chromosomes/scaffolds</b> | <b>Physical positions (bp)</b> | <b>SNPs</b> |
|-------------|----------------|------------------|------------------------------|--------------------------------|-------------|
| 43320       | CadSNP18915    | <i>Desi</i>      | Ca_Desig_denovo              | 20279840                       | (C/T)       |
| 43321       | CadSNP18916    | <i>Desi</i>      | Ca_Desig_denovo              | 20279842                       | (G/A)       |
| 43322       | CadSNP18917    | <i>Desi</i>      | Ca_Desig_denovo              | 20286413                       | (G/A)       |
| 43323       | CadSNP18918    | <i>Desi</i>      | Ca_Desig_denovo              | 20287243                       | (C/T)       |
| 43324       | CadSNP18919    | <i>Desi</i>      | Ca_Desig_denovo              | 20287966                       | (C/T)       |
| 43325       | CadSNP18920    | <i>Desi</i>      | Ca_Desig_denovo              | 20287969                       | (A/G)       |
| 43326       | CadSNP18921    | <i>Desi</i>      | Ca_Desig_denovo              | 20287984                       | (T/C)       |
| 43327       | CadSNP18922    | <i>Desi</i>      | Ca_Desig_denovo              | 20288343                       | (T/G)       |
| 43328       | CadSNP18923    | <i>Desi</i>      | Ca_Desig_denovo              | 20290943                       | (T/G)       |
| 43329       | CadSNP18924    | <i>Desi</i>      | Ca_Desig_denovo              | 20299625                       | (G/T)       |
| 43330       | CadSNP18925    | <i>Desi</i>      | Ca_Desig_denovo              | 20303727                       | (C/T)       |
| 43331       | CadSNP18926    | <i>Desi</i>      | Ca_Desig_denovo              | 20307488                       | (C/A)       |
| 43332       | CadSNP18927    | <i>Desi</i>      | Ca_Desig_denovo              | 20307512                       | (G/A)       |
| 43333       | CadSNP18928    | <i>Desi</i>      | Ca_Desig_denovo              | 20312736                       | (A/G)       |
| 43334       | CadSNP18929    | <i>Desi</i>      | Ca_Desig_denovo              | 20315803                       | (T/C)       |
| 43335       | CadSNP18930    | <i>Desi</i>      | Ca_Desig_denovo              | 20317919                       | (C/G)       |
| 43336       | CadSNP18931    | <i>Desi</i>      | Ca_Desig_denovo              | 20317931                       | (A/G)       |
| 43337       | CadSNP18932    | <i>Desi</i>      | Ca_Desig_denovo              | 20329073                       | (T/G)       |
| 43338       | CadSNP18933    | <i>Desi</i>      | Ca_Desig_denovo              | 20329900                       | (G/A)       |
| 43339       | CadSNP18934    | <i>Desi</i>      | Ca_Desig_denovo              | 20332766                       | (A/T)       |
| 43340       | CadSNP18935    | <i>Desi</i>      | Ca_Desig_denovo              | 20336442                       | (T/C)       |
| 43341       | CadSNP18936    | <i>Desi</i>      | Ca_Desig_denovo              | 20336487                       | (G/C)       |
| 43342       | CadSNP18937    | <i>Desi</i>      | Ca_Desig_denovo              | 20340233                       | (T/C)       |
| 43343       | CadSNP18938    | <i>Desi</i>      | Ca_Desig_denovo              | 20340266                       | (C/T)       |
| 43344       | CadSNP18939    | <i>Desi</i>      | Ca_Desig_denovo              | 20341099                       | (C/T)       |
| 43345       | CadSNP18940    | <i>Desi</i>      | Ca_Desig_denovo              | 20344304                       | (T/G)       |
| 43346       | CadSNP18941    | <i>Desi</i>      | Ca_Desig_denovo              | 20351016                       | (G/A)       |
| 43347       | CadSNP18942    | <i>Desi</i>      | Ca_Desig_denovo              | 20352256                       | (C/T)       |
| 43348       | CadSNP18943    | <i>Desi</i>      | Ca_Desig_denovo              | 20356043                       | (A/T)       |
| 43349       | CadSNP18944    | <i>Desi</i>      | Ca_Desig_denovo              | 20362434                       | (T/C)       |
| 43350       | CadSNP18945    | <i>Desi</i>      | Ca_Desig_denovo              | 20366733                       | (C/G)       |
| 43351       | CadSNP18946    | <i>Desi</i>      | Ca_Desig_denovo              | 20366763                       | (T/C)       |
| 43352       | CadSNP18947    | <i>Desi</i>      | Ca_Desig_denovo              | 20401628                       | (C/A)       |
| 43353       | CadSNP18948    | <i>Desi</i>      | Ca_Desig_denovo              | 20401643                       | (A/G)       |
| 43354       | CadSNP18949    | <i>Desi</i>      | Ca_Desig_denovo              | 20405795                       | (A/G)       |
| 43355       | CadSNP18950    | <i>Desi</i>      | Ca_Desig_denovo              | 20405798                       | (G/C)       |
| 43356       | CadSNP18951    | <i>Desi</i>      | Ca_Desig_denovo              | 20410006                       | (C/T)       |
| 43357       | CadSNP18952    | <i>Desi</i>      | Ca_Desig_denovo              | 20410486                       | (T/A)       |

| <b>S.N.</b> | <b>SNP IDs</b> | <b>Cultivars</b> | <b>Chromosomes/scaffolds</b> | <b>Physical positions (bp)</b> | <b>SNPs</b> |
|-------------|----------------|------------------|------------------------------|--------------------------------|-------------|
| 43358       | CadSNP18953    | <i>Desi</i>      | Ca_Desig_denovo              | 20410756                       | (G/C)       |
| 43359       | CadSNP18954    | <i>Desi</i>      | Ca_Desig_denovo              | 20410771                       | (C/A)       |
| 43360       | CadSNP18955    | <i>Desi</i>      | Ca_Desig_denovo              | 20411765                       | (G/A)       |
| 43361       | CadSNP18956    | <i>Desi</i>      | Ca_Desig_denovo              | 20411797                       | (C/G)       |
| 43362       | CadSNP18957    | <i>Desi</i>      | Ca_Desig_denovo              | 20417804                       | (A/G)       |
| 43363       | CadSNP18958    | <i>Desi</i>      | Ca_Desig_denovo              | 20421439                       | (T/C)       |
| 43364       | CadSNP18959    | <i>Desi</i>      | Ca_Desig_denovo              | 20430534                       | (C/T)       |
| 43365       | CadSNP18960    | <i>Desi</i>      | Ca_Desig_denovo              | 20430553                       | (T/C)       |
| 43366       | CadSNP18961    | <i>Desi</i>      | Ca_Desig_denovo              | 20432308                       | (T/C)       |
| 43367       | CadSNP18962    | <i>Desi</i>      | Ca_Desig_denovo              | 20432338                       | (T/C)       |
| 43368       | CadSNP18963    | <i>Desi</i>      | Ca_Desig_denovo              | 20440133                       | (C/T)       |
| 43369       | CadSNP18964    | <i>Desi</i>      | Ca_Desig_denovo              | 20440153                       | (T/G)       |
| 43370       | CadSNP18965    | <i>Desi</i>      | Ca_Desig_denovo              | 20441979                       | (T/C)       |
| 43371       | CadSNP18966    | <i>Desi</i>      | Ca_Desig_denovo              | 20442031                       | (G/T)       |
| 43372       | CadSNP18967    | <i>Desi</i>      | Ca_Desig_denovo              | 20445503                       | (C/A)       |
| 43373       | CadSNP18968    | <i>Desi</i>      | Ca_Desig_denovo              | 20445530                       | (G/C)       |
| 43374       | CadSNP18969    | <i>Desi</i>      | Ca_Desig_denovo              | 20448223                       | (T/C)       |
| 43375       | CadSNP18970    | <i>Desi</i>      | Ca_Desig_denovo              | 20448282                       | (G/C)       |
| 43376       | CadSNP18971    | <i>Desi</i>      | Ca_Desig_denovo              | 20453386                       | (T/C)       |
| 43377       | CadSNP18972    | <i>Desi</i>      | Ca_Desig_denovo              | 20458082                       | (G/A)       |
| 43378       | CadSNP18973    | <i>Desi</i>      | Ca_Desig_denovo              | 20458121                       | (A/G)       |
| 43379       | CadSNP18974    | <i>Desi</i>      | Ca_Desig_denovo              | 20459370                       | (G/A)       |
| 43380       | CadSNP18975    | <i>Desi</i>      | Ca_Desig_denovo              | 20463389                       | (C/G)       |
| 43381       | CadSNP18976    | <i>Desi</i>      | Ca_Desig_denovo              | 20466276                       | (C/A)       |
| 43382       | CadSNP18977    | <i>Desi</i>      | Ca_Desig_denovo              | 20466297                       | (A/G)       |
| 43383       | CadSNP18978    | <i>Desi</i>      | Ca_Desig_denovo              | 20466989                       | (T/C)       |
| 43384       | CadSNP18979    | <i>Desi</i>      | Ca_Desig_denovo              | 20467018                       | (G/C)       |
| 43385       | CadSNP18980    | <i>Desi</i>      | Ca_Desig_denovo              | 20469131                       | (A/G)       |
| 43386       | CadSNP18981    | <i>Desi</i>      | Ca_Desig_denovo              | 20476484                       | (G/A)       |
| 43387       | CadSNP18982    | <i>Desi</i>      | Ca_Desig_denovo              | 20476516                       | (T/C)       |
| 43388       | CadSNP18983    | <i>Desi</i>      | Ca_Desig_denovo              | 20477161                       | (G/T)       |
| 43389       | CadSNP18984    | <i>Desi</i>      | Ca_Desig_denovo              | 20477200                       | (G/T)       |
| 43390       | CadSNP18985    | <i>Desi</i>      | Ca_Desig_denovo              | 20488599                       | (C/T)       |
| 43391       | CadSNP18986    | <i>Desi</i>      | Ca_Desig_denovo              | 20488617                       | (T/G)       |
| 43392       | CadSNP18987    | <i>Desi</i>      | Ca_Desig_denovo              | 20489446                       | (G/A)       |
| 43393       | CadSNP18988    | <i>Desi</i>      | Ca_Desig_denovo              | 20494417                       | (C/T)       |
| 43394       | CadSNP18989    | <i>Desi</i>      | Ca_Desig_denovo              | 20494423                       | (C/T)       |
| 43395       | CadSNP18990    | <i>Desi</i>      | Ca_Desig_denovo              | 20517339                       | (T/G)       |



| <b>S.N.</b> | <b>SNP IDs</b> | <b>Cultivars</b> | <b>Chromosomes/scaffolds</b> | <b>Physical positions (bp)</b> | <b>SNPs</b> |
|-------------|----------------|------------------|------------------------------|--------------------------------|-------------|
| 43396       | CadSNP18991    | <i>Desi</i>      | Ca_Desig_denovo              | 20517380                       | (A/C)       |
| 43397       | CadSNP18992    | <i>Desi</i>      | Ca_Desig_denovo              | 20517382                       | (A/G)       |
| 43398       | CadSNP18993    | <i>Desi</i>      | Ca_Desig_denovo              | 20526299                       | (T/C)       |
| 43399       | CadSNP18994    | <i>Desi</i>      | Ca_Desig_denovo              | 20528859                       | (G/C)       |
| 43400       | CadSNP18995    | <i>Desi</i>      | Ca_Desig_denovo              | 20528910                       | (C/T)       |
| 43401       | CadSNP18996    | <i>Desi</i>      | Ca_Desig_denovo              | 20531099                       | (C/A)       |
| 43402       | CadSNP18997    | <i>Desi</i>      | Ca_Desig_denovo              | 20531144                       | (C/T)       |
| 43403       | CadSNP18998    | <i>Desi</i>      | Ca_Desig_denovo              | 20532026                       | (G/A)       |
| 43404       | CadSNP18999    | <i>Desi</i>      | Ca_Desig_denovo              | 20539990                       | (T/C)       |
| 43405       | CadSNP19000    | <i>Desi</i>      | Ca_Desig_denovo              | 20547533                       | (C/A)       |
| 43406       | CadSNP19001    | <i>Desi</i>      | Ca_Desig_denovo              | 20547537                       | (G/C)       |
| 43407       | CadSNP19002    | <i>Desi</i>      | Ca_Desig_denovo              | 20547706                       | (T/C)       |
| 43408       | CadSNP19003    | <i>Desi</i>      | Ca_Desig_denovo              | 20547725                       | (A/G)       |
| 43409       | CadSNP19004    | <i>Desi</i>      | Ca_Desig_denovo              | 20553103                       | (G/A)       |
| 43410       | CadSNP19005    | <i>Desi</i>      | Ca_Desig_denovo              | 20559975                       | (A/C)       |
| 43411       | CadSNP19006    | <i>Desi</i>      | Ca_Desig_denovo              | 20565279                       | (A/T)       |
| 43412       | CadSNP19007    | <i>Desi</i>      | Ca_Desig_denovo              | 20565282                       | (A/C)       |
| 43413       | CadSNP19008    | <i>Desi</i>      | Ca_Desig_denovo              | 20574713                       | (T/G)       |
| 43414       | CadSNP19009    | <i>Desi</i>      | Ca_Desig_denovo              | 20574716                       | (G/A)       |
| 43415       | CadSNP19010    | <i>Desi</i>      | Ca_Desig_denovo              | 20577986                       | (A/G)       |
| 43416       | CadSNP19011    | <i>Desi</i>      | Ca_Desig_denovo              | 20578013                       | (C/T)       |
| 43417       | CadSNP19012    | <i>Desi</i>      | Ca_Desig_denovo              | 20581768                       | (G/T)       |
| 43418       | CadSNP19013    | <i>Desi</i>      | Ca_Desig_denovo              | 20587066                       | (C/A)       |
| 43419       | CadSNP19014    | <i>Desi</i>      | Ca_Desig_denovo              | 20589772                       | (C/A)       |
| 43420       | CadSNP19015    | <i>Desi</i>      | Ca_Desig_denovo              | 20589778                       | (T/G)       |
| 43421       | CadSNP19016    | <i>Desi</i>      | Ca_Desig_denovo              | 20592300                       | (G/C)       |
| 43422       | CadSNP19017    | <i>Desi</i>      | Ca_Desig_denovo              | 20593378                       | (T/C)       |
| 43423       | CadSNP19018    | <i>Desi</i>      | Ca_Desig_denovo              | 20593408                       | (A/C)       |
| 43424       | CadSNP19019    | <i>Desi</i>      | Ca_Desig_denovo              | 20594272                       | (T/C)       |
| 43425       | CadSNP19020    | <i>Desi</i>      | Ca_Desig_denovo              | 20597043                       | (T/C)       |
| 43426       | CadSNP19021    | <i>Desi</i>      | Ca_Desig_denovo              | 20604905                       | (A/G)       |
| 43427       | CadSNP19022    | <i>Desi</i>      | Ca_Desig_denovo              | 20604926                       | (A/C)       |
| 43428       | CadSNP19023    | <i>Desi</i>      | Ca_Desig_denovo              | 20605969                       | (T/C)       |
| 43429       | CadSNP19024    | <i>Desi</i>      | Ca_Desig_denovo              | 20608659                       | (T/A)       |
| 43430       | CadSNP19025    | <i>Desi</i>      | Ca_Desig_denovo              | 20613511                       | (C/T)       |
| 43431       | CadSNP19026    | <i>Desi</i>      | Ca_Desig_denovo              | 20619160                       | (G/A)       |
| 43432       | CadSNP19027    | <i>Desi</i>      | Ca_Desig_denovo              | 20619171                       | (C/T)       |
| 43433       | CadSNP19028    | <i>Desi</i>      | Ca_Desig_denovo              | 20628244                       | (G/C)       |

| <b>S.N.</b> | <b>SNP IDs</b> | <b>Cultivars</b> | <b>Chromosomes/scaffolds</b> | <b>Physical positions (bp)</b> | <b>SNPs</b> |
|-------------|----------------|------------------|------------------------------|--------------------------------|-------------|
| 43434       | CadSNP19029    | <i>Desi</i>      | Ca_Desig_denovo              | 20632574                       | (A/C)       |
| 43435       | CadSNP19030    | <i>Desi</i>      | Ca_Desig_denovo              | 20636606                       | (T/G)       |
| 43436       | CadSNP19031    | <i>Desi</i>      | Ca_Desig_denovo              | 20638371                       | (A/C)       |
| 43437       | CadSNP19032    | <i>Desi</i>      | Ca_Desig_denovo              | 20638373                       | (A/C)       |
| 43438       | CadSNP19033    | <i>Desi</i>      | Ca_Desig_denovo              | 20644093                       | (G/A)       |
| 43439       | CadSNP19034    | <i>Desi</i>      | Ca_Desig_denovo              | 20647798                       | (G/C)       |
| 43440       | CadSNP19035    | <i>Desi</i>      | Ca_Desig_denovo              | 20650609                       | (A/G)       |
| 43441       | CadSNP19036    | <i>Desi</i>      | Ca_Desig_denovo              | 20656734                       | (G/A)       |
| 43442       | CadSNP19037    | <i>Desi</i>      | Ca_Desig_denovo              | 20656784                       | (T/G)       |
| 43443       | CadSNP19038    | <i>Desi</i>      | Ca_Desig_denovo              | 20662759                       | (A/G)       |
| 43444       | CadSNP19039    | <i>Desi</i>      | Ca_Desig_denovo              | 20662762                       | (T/C)       |
| 43445       | CadSNP19040    | <i>Desi</i>      | Ca_Desig_denovo              | 20662763                       | (A/G)       |
| 43446       | CadSNP19041    | <i>Desi</i>      | Ca_Desig_denovo              | 20669471                       | (G/A)       |
| 43447       | CadSNP19042    | <i>Desi</i>      | Ca_Desig_denovo              | 20670842                       | (C/G)       |
| 43448       | CadSNP19043    | <i>Desi</i>      | Ca_Desig_denovo              | 20670864                       | (G/T)       |
| 43449       | CadSNP19044    | <i>Desi</i>      | Ca_Desig_denovo              | 20672527                       | (G/C)       |
| 43450       | CadSNP19045    | <i>Desi</i>      | Ca_Desig_denovo              | 20673961                       | (C/G)       |
| 43451       | CadSNP19046    | <i>Desi</i>      | Ca_Desig_denovo              | 20674647                       | (A/T)       |
| 43452       | CadSNP19047    | <i>Desi</i>      | Ca_Desig_denovo              | 20679041                       | (C/A)       |
| 43453       | CadSNP19048    | <i>Desi</i>      | Ca_Desig_denovo              | 20679067                       | (C/T)       |
| 43454       | CadSNP19049    | <i>Desi</i>      | Ca_Desig_denovo              | 20679795                       | (C/T)       |
| 43455       | CadSNP19050    | <i>Desi</i>      | Ca_Desig_denovo              | 20679797                       | (C/G)       |
| 43456       | CadSNP19051    | <i>Desi</i>      | Ca_Desig_denovo              | 20680695                       | (G/A)       |
| 43457       | CadSNP19052    | <i>Desi</i>      | Ca_Desig_denovo              | 20680710                       | (A/G)       |
| 43458       | CadSNP19053    | <i>Desi</i>      | Ca_Desig_denovo              | 20684366                       | (C/G)       |
| 43459       | CadSNP19054    | <i>Desi</i>      | Ca_Desig_denovo              | 20684390                       | (T/G)       |
| 43460       | CadSNP19055    | <i>Desi</i>      | Ca_Desig_denovo              | 20686578                       | (C/T)       |
| 43461       | CadSNP19056    | <i>Desi</i>      | Ca_Desig_denovo              | 20691259                       | (C/G)       |
| 43462       | CadSNP19057    | <i>Desi</i>      | Ca_Desig_denovo              | 20696510                       | (G/T)       |
| 43463       | CadSNP19058    | <i>Desi</i>      | Ca_Desig_denovo              | 20696555                       | (C/G)       |
| 43464       | CadSNP19059    | <i>Desi</i>      | Ca_Desig_denovo              | 20697440                       | (C/G)       |
| 43465       | CadSNP19060    | <i>Desi</i>      | Ca_Desig_denovo              | 20698747                       | (C/T)       |
| 43466       | CadSNP19061    | <i>Desi</i>      | Ca_Desig_denovo              | 20699481                       | (A/G)       |
| 43467       | CadSNP19062    | <i>Desi</i>      | Ca_Desig_denovo              | 20699492                       | (C/G)       |
| 43468       | CadSNP19063    | <i>Desi</i>      | Ca_Desig_denovo              | 20700062                       | (T/C)       |
| 43469       | CadSNP19064    | <i>Desi</i>      | Ca_Desig_denovo              | 20700092                       | (A/G)       |
| 43470       | CadSNP19065    | <i>Desi</i>      | Ca_Desig_denovo              | 20700110                       | (G/A)       |
| 43471       | CadSNP19066    | <i>Desi</i>      | Ca_Desig_denovo              | 20701140                       | (A/G)       |

| <b>S.N.</b> | <b>SNP IDs</b> | <b>Cultivars</b> | <b>Chromosomes/scaffolds</b> | <b>Physical positions (bp)</b> | <b>SNPs</b> |
|-------------|----------------|------------------|------------------------------|--------------------------------|-------------|
| 43472       | CadSNP19067    | <i>Desi</i>      | Ca_Desig_denovo              | 20701143                       | (G/A)       |
| 43473       | CadSNP19068    | <i>Desi</i>      | Ca_Desig_denovo              | 20709188                       | (C/G)       |
| 43474       | CadSNP19069    | <i>Desi</i>      | Ca_Desig_denovo              | 20709229                       | (T/C)       |
| 43475       | CadSNP19070    | <i>Desi</i>      | Ca_Desig_denovo              | 20710211                       | (G/C)       |
| 43476       | CadSNP19071    | <i>Desi</i>      | Ca_Desig_denovo              | 20711787                       | (T/C)       |
| 43477       | CadSNP19072    | <i>Desi</i>      | Ca_Desig_denovo              | 20711795                       | (G/C)       |
| 43478       | CadSNP19073    | <i>Desi</i>      | Ca_Desig_denovo              | 20711964                       | (T/C)       |
| 43479       | CadSNP19074    | <i>Desi</i>      | Ca_Desig_denovo              | 20712019                       | (A/G)       |
| 43480       | CadSNP19075    | <i>Desi</i>      | Ca_Desig_denovo              | 20712953                       | (G/T)       |
| 43481       | CadSNP19076    | <i>Desi</i>      | Ca_Desig_denovo              | 20723016                       | (A/C)       |
| 43482       | CadSNP19077    | <i>Desi</i>      | Ca_Desig_denovo              | 20723043                       | (T/C)       |
| 43483       | CadSNP19078    | <i>Desi</i>      | Ca_Desig_denovo              | 20725349                       | (A/G)       |
| 43484       | CadSNP19079    | <i>Desi</i>      | Ca_Desig_denovo              | 20725421                       | (T/C)       |
| 43485       | CadSNP19080    | <i>Desi</i>      | Ca_Desig_denovo              | 20726659                       | (C/T)       |
| 43486       | CadSNP19081    | <i>Desi</i>      | Ca_Desig_denovo              | 20726704                       | (C/T)       |
| 43487       | CadSNP19082    | <i>Desi</i>      | Ca_Desig_denovo              | 20732627                       | (G/A)       |
| 43488       | CadSNP19083    | <i>Desi</i>      | Ca_Desig_denovo              | 20732635                       | (C/T)       |
| 43489       | CadSNP19084    | <i>Desi</i>      | Ca_Desig_denovo              | 20739880                       | (T/C)       |
| 43490       | CadSNP19085    | <i>Desi</i>      | Ca_Desig_denovo              | 20750308                       | (C/T)       |
| 43491       | CadSNP19086    | <i>Desi</i>      | Ca_Desig_denovo              | 20761524                       | (A/G)       |
| 43492       | CadSNP19087    | <i>Desi</i>      | Ca_Desig_denovo              | 20765727                       | (G/C)       |
| 43493       | CadSNP19088    | <i>Desi</i>      | Ca_Desig_denovo              | 20765779                       | (T/C)       |
| 43494       | CadSNP19089    | <i>Desi</i>      | Ca_Desig_denovo              | 20766577                       | (G/C)       |
| 43495       | CadSNP19090    | <i>Desi</i>      | Ca_Desig_denovo              | 20766607                       | (C/T)       |
| 43496       | CadSNP19091    | <i>Desi</i>      | Ca_Desig_denovo              | 20774460                       | (A/G)       |
| 43497       | CadSNP19092    | <i>Desi</i>      | Ca_Desig_denovo              | 20775954                       | (A/C)       |
| 43498       | CadSNP19093    | <i>Desi</i>      | Ca_Desig_denovo              | 20775995                       | (A/G)       |
| 43499       | CadSNP19094    | <i>Desi</i>      | Ca_Desig_denovo              | 20778728                       | (A/G)       |
| 43500       | CadSNP19095    | <i>Desi</i>      | Ca_Desig_denovo              | 20786727                       | (T/G)       |
| 43501       | CadSNP19096    | <i>Desi</i>      | Ca_Desig_denovo              | 20786787                       | (G/A)       |
| 43502       | CadSNP19097    | <i>Desi</i>      | Ca_Desig_denovo              | 20790726                       | (A/C)       |
| 43503       | CadSNP19098    | <i>Desi</i>      | Ca_Desig_denovo              | 20800682                       | (T/C)       |
| 43504       | CadSNP19099    | <i>Desi</i>      | Ca_Desig_denovo              | 20805364                       | (G/C)       |
| 43505       | CadSNP19100    | <i>Desi</i>      | Ca_Desig_denovo              | 20805373                       | (T/G)       |
| 43506       | CadSNP19101    | <i>Desi</i>      | Ca_Desig_denovo              | 20810635                       | (T/C)       |
| 43507       | CadSNP19102    | <i>Desi</i>      | Ca_Desig_denovo              | 20810637                       | (C/T)       |
| 43508       | CadSNP19103    | <i>Desi</i>      | Ca_Desig_denovo              | 20811560                       | (C/G)       |
| 43509       | CadSNP19104    | <i>Desi</i>      | Ca_Desig_denovo              | 20811602                       | (C/A)       |

| <b>S.N.</b> | <b>SNP IDs</b> | <b>Cultivars</b> | <b>Chromosomes/scaffolds</b> | <b>Physical positions (bp)</b> | <b>SNPs</b> |
|-------------|----------------|------------------|------------------------------|--------------------------------|-------------|
| 43510       | CadSNP19105    | <i>Desi</i>      | Ca_Desig_denovo              | 20811850                       | (C/G)       |
| 43511       | CadSNP19106    | <i>Desi</i>      | Ca_Desig_denovo              | 20821966                       | (C/T)       |
| 43512       | CadSNP19107    | <i>Desi</i>      | Ca_Desig_denovo              | 20823930                       | (C/T)       |
| 43513       | CadSNP19108    | <i>Desi</i>      | Ca_Desig_denovo              | 20825026                       | (A/C)       |
| 43514       | CadSNP19109    | <i>Desi</i>      | Ca_Desig_denovo              | 20829994                       | (G/T)       |
| 43515       | CadSNP19110    | <i>Desi</i>      | Ca_Desig_denovo              | 20830022                       | (A/G)       |
| 43516       | CadSNP19111    | <i>Desi</i>      | Ca_Desig_denovo              | 20833227                       | (T/C)       |
| 43517       | CadSNP19112    | <i>Desi</i>      | Ca_Desig_denovo              | 20834722                       | (A/G)       |
| 43518       | CadSNP19113    | <i>Desi</i>      | Ca_Desig_denovo              | 20836305                       | (C/G)       |
| 43519       | CadSNP19114    | <i>Desi</i>      | Ca_Desig_denovo              | 20836308                       | (C/T)       |
| 43520       | CadSNP19115    | <i>Desi</i>      | Ca_Desig_denovo              | 20839543                       | (T/C)       |
| 43521       | CadSNP19116    | <i>Desi</i>      | Ca_Desig_denovo              | 20839549                       | (T/G)       |
| 43522       | CadSNP19117    | <i>Desi</i>      | Ca_Desig_denovo              | 20840680                       | (G/A)       |
| 43523       | CadSNP19118    | <i>Desi</i>      | Ca_Desig_denovo              | 20840738                       | (C/T)       |
| 43524       | CadSNP19119    | <i>Desi</i>      | Ca_Desig_denovo              | 20841502                       | (C/G)       |
| 43525       | CadSNP19120    | <i>Desi</i>      | Ca_Desig_denovo              | 20849426                       | (C/A)       |
| 43526       | CadSNP19121    | <i>Desi</i>      | Ca_Desig_denovo              | 20851154                       | (G/A)       |
| 43527       | CadSNP19122    | <i>Desi</i>      | Ca_Desig_denovo              | 20851169                       | (T/C)       |
| 43528       | CadSNP19123    | <i>Desi</i>      | Ca_Desig_denovo              | 20856639                       | (T/C)       |
| 43529       | CadSNP19124    | <i>Desi</i>      | Ca_Desig_denovo              | 20860973                       | (A/G)       |
| 43530       | CadSNP19125    | <i>Desi</i>      | Ca_Desig_denovo              | 20862649                       | (T/C)       |
| 43531       | CadSNP19126    | <i>Desi</i>      | Ca_Desig_denovo              | 20865373                       | (G/A)       |
| 43532       | CadSNP19127    | <i>Desi</i>      | Ca_Desig_denovo              | 20865387                       | (G/A)       |
| 43533       | CadSNP19128    | <i>Desi</i>      | Ca_Desig_denovo              | 20866131                       | (T/C)       |
| 43534       | CadSNP19129    | <i>Desi</i>      | Ca_Desig_denovo              | 20866985                       | (G/A)       |
| 43535       | CadSNP19130    | <i>Desi</i>      | Ca_Desig_denovo              | 20867011                       | (T/C)       |
| 43536       | CadSNP19131    | <i>Desi</i>      | Ca_Desig_denovo              | 20869979                       | (A/G)       |
| 43537       | CadSNP19132    | <i>Desi</i>      | Ca_Desig_denovo              | 20874263                       | (A/C)       |
| 43538       | CadSNP19133    | <i>Desi</i>      | Ca_Desig_denovo              | 20874920                       | (G/A)       |
| 43539       | CadSNP19134    | <i>Desi</i>      | Ca_Desig_denovo              | 20881238                       | (A/G)       |
| 43540       | CadSNP19135    | <i>Desi</i>      | Ca_Desig_denovo              | 20882422                       | (C/G)       |
| 43541       | CadSNP19136    | <i>Desi</i>      | Ca_Desig_denovo              | 20882497                       | (C/G)       |
| 43542       | CadSNP19137    | <i>Desi</i>      | Ca_Desig_denovo              | 20886433                       | (C/T)       |
| 43543       | CadSNP19138    | <i>Desi</i>      | Ca_Desig_denovo              | 20887979                       | (T/C)       |
| 43544       | CadSNP19139    | <i>Desi</i>      | Ca_Desig_denovo              | 20891620                       | (G/A)       |
| 43545       | CadSNP19140    | <i>Desi</i>      | Ca_Desig_denovo              | 20892550                       | (C/A)       |
| 43546       | CadSNP19141    | <i>Desi</i>      | Ca_Desig_denovo              | 20892625                       | (T/C)       |
| 43547       | CadSNP19142    | <i>Desi</i>      | Ca_Desig_denovo              | 20904517                       | (T/C)       |

| <b>S.N.</b> | <b>SNP IDs</b> | <b>Cultivars</b> | <b>Chromosomes/scaffolds</b> | <b>Physical positions (bp)</b> | <b>SNPs</b> |
|-------------|----------------|------------------|------------------------------|--------------------------------|-------------|
| 43548       | CadSNP19143    | <i>Desi</i>      | Ca_Desig_denovo              | 20910345                       | (G/T)       |
| 43549       | CadSNP19144    | <i>Desi</i>      | Ca_Desig_denovo              | 20910346                       | (A/C)       |
| 43550       | CadSNP19145    | <i>Desi</i>      | Ca_Desig_denovo              | 20913304                       | (C/T)       |
| 43551       | CadSNP19146    | <i>Desi</i>      | Ca_Desig_denovo              | 20913354                       | (C/T)       |
| 43552       | CadSNP19147    | <i>Desi</i>      | Ca_Desig_denovo              | 20917199                       | (G/A)       |
| 43553       | CadSNP19148    | <i>Desi</i>      | Ca_Desig_denovo              | 20930680                       | (A/G)       |
| 43554       | CadSNP19149    | <i>Desi</i>      | Ca_Desig_denovo              | 20930720                       | (T/C)       |
| 43555       | CadSNP19150    | <i>Desi</i>      | Ca_Desig_denovo              | 20932466                       | (C/G)       |
| 43556       | CadSNP19151    | <i>Desi</i>      | Ca_Desig_denovo              | 20932472                       | (C/T)       |
| 43557       | CadSNP19152    | <i>Desi</i>      | Ca_Desig_denovo              | 20937657                       | (C/G)       |
| 43558       | CadSNP19153    | <i>Desi</i>      | Ca_Desig_denovo              | 20937689                       | (T/A)       |
| 43559       | CadSNP19154    | <i>Desi</i>      | Ca_Desig_denovo              | 20945682                       | (G/A)       |
| 43560       | CadSNP19155    | <i>Desi</i>      | Ca_Desig_denovo              | 20945697                       | (A/G)       |
| 43561       | CadSNP19156    | <i>Desi</i>      | Ca_Desig_denovo              | 20951700                       | (G/A)       |
| 43562       | CadSNP19157    | <i>Desi</i>      | Ca_Desig_denovo              | 20951733                       | (C/G)       |
| 43563       | CadSNP19158    | <i>Desi</i>      | Ca_Desig_denovo              | 20957817                       | (T/G)       |
| 43564       | CadSNP19159    | <i>Desi</i>      | Ca_Desig_denovo              | 20961410                       | (C/T)       |
| 43565       | CadSNP19160    | <i>Desi</i>      | Ca_Desig_denovo              | 20967238                       | (G/A)       |
| 43566       | CadSNP19161    | <i>Desi</i>      | Ca_Desig_denovo              | 20972520                       | (A/G)       |
| 43567       | CadSNP19162    | <i>Desi</i>      | Ca_Desig_denovo              | 20977739                       | (G/A)       |
| 43568       | CadSNP19163    | <i>Desi</i>      | Ca_Desig_denovo              | 20977763                       | (A/T)       |
| 43569       | CadSNP19164    | <i>Desi</i>      | Ca_Desig_denovo              | 20980109                       | (G/C)       |
| 43570       | CadSNP19165    | <i>Desi</i>      | Ca_Desig_denovo              | 20984837                       | (G/T)       |
| 43571       | CadSNP19166    | <i>Desi</i>      | Ca_Desig_denovo              | 20989470                       | (C/T)       |
| 43572       | CadSNP19167    | <i>Desi</i>      | Ca_Desig_denovo              | 20991543                       | (T/G)       |
| 43573       | CadSNP19168    | <i>Desi</i>      | Ca_Desig_denovo              | 20992027                       | (T/G)       |
| 43574       | CadSNP19169    | <i>Desi</i>      | Ca_Desig_denovo              | 20996165                       | (C/T)       |
| 43575       | CadSNP19170    | <i>Desi</i>      | Ca_Desig_denovo              | 21003641                       | (A/G)       |
| 43576       | CadSNP19171    | <i>Desi</i>      | Ca_Desig_denovo              | 21003665                       | (C/G)       |
| 43577       | CadSNP19172    | <i>Desi</i>      | Ca_Desig_denovo              | 21008029                       | (G/A)       |
| 43578       | CadSNP19173    | <i>Desi</i>      | Ca_Desig_denovo              | 21009183                       | (A/G)       |
| 43579       | CadSNP19174    | <i>Desi</i>      | Ca_Desig_denovo              | 21012155                       | (C/T)       |
| 43580       | CadSNP19175    | <i>Desi</i>      | Ca_Desig_denovo              | 21012170                       | (T/C)       |
| 43581       | CadSNP19176    | <i>Desi</i>      | Ca_Desig_denovo              | 21021194                       | (T/G)       |
| 43582       | CadSNP19177    | <i>Desi</i>      | Ca_Desig_denovo              | 21021231                       | (G/C)       |
| 43583       | CadSNP19178    | <i>Desi</i>      | Ca_Desig_denovo              | 21028394                       | (C/A)       |
| 43584       | CadSNP19179    | <i>Desi</i>      | Ca_Desig_denovo              | 21039491                       | (A/G)       |
| 43585       | CadSNP19180    | <i>Desi</i>      | Ca_Desig_denovo              | 21039520                       | (C/G)       |

| <b>S.N.</b> | <b>SNP IDs</b> | <b>Cultivars</b> | <b>Chromosomes/scaffolds</b> | <b>Physical positions (bp)</b> | <b>SNPs</b> |
|-------------|----------------|------------------|------------------------------|--------------------------------|-------------|
| 43586       | CadSNP19181    | <i>Desi</i>      | Ca_Desig_denovo              | 21045182                       | (T/C)       |
| 43587       | CadSNP19182    | <i>Desi</i>      | Ca_Desig_denovo              | 21045230                       | (A/G)       |
| 43588       | CadSNP19183    | <i>Desi</i>      | Ca_Desig_denovo              | 21046934                       | (C/T)       |
| 43589       | CadSNP19184    | <i>Desi</i>      | Ca_Desig_denovo              | 21049361                       | (C/T)       |
| 43590       | CadSNP19185    | <i>Desi</i>      | Ca_Desig_denovo              | 21051497                       | (T/C)       |
| 43591       | CadSNP19186    | <i>Desi</i>      | Ca_Desig_denovo              | 21051512                       | (C/A)       |
| 43592       | CadSNP19187    | <i>Desi</i>      | Ca_Desig_denovo              | 21052316                       | (T/C)       |
| 43593       | CadSNP19188    | <i>Desi</i>      | Ca_Desig_denovo              | 21055892                       | (T/G)       |
| 43594       | CadSNP19189    | <i>Desi</i>      | Ca_Desig_denovo              | 21055905                       | (G/A)       |
| 43595       | CadSNP19190    | <i>Desi</i>      | Ca_Desig_denovo              | 21061449                       | (G/C)       |
| 43596       | CadSNP19191    | <i>Desi</i>      | Ca_Desig_denovo              | 21061470                       | (T/C)       |
| 43597       | CadSNP19192    | <i>Desi</i>      | Ca_Desig_denovo              | 21065455                       | (C/T)       |
| 43598       | CadSNP19193    | <i>Desi</i>      | Ca_Desig_denovo              | 21065483                       | (C/G)       |
| 43599       | CadSNP19194    | <i>Desi</i>      | Ca_Desig_denovo              | 21070468                       | (C/T)       |
| 43600       | CadSNP19195    | <i>Desi</i>      | Ca_Desig_denovo              | 21070480                       | (T/C)       |
| 43601       | CadSNP19196    | <i>Desi</i>      | Ca_Desig_denovo              | 21071031                       | (C/G)       |
| 43602       | CadSNP19197    | <i>Desi</i>      | Ca_Desig_denovo              | 21071041                       | (G/C)       |
| 43603       | CadSNP19198    | <i>Desi</i>      | Ca_Desig_denovo              | 21079439                       | (G/C)       |
| 43604       | CadSNP19199    | <i>Desi</i>      | Ca_Desig_denovo              | 21086281                       | (C/A)       |
| 43605       | CadSNP19200    | <i>Desi</i>      | Ca_Desig_denovo              | 21090556                       | (T/A)       |
| 43606       | CadSNP19201    | <i>Desi</i>      | Ca_Desig_denovo              | 21090625                       | (C/T)       |
| 43607       | CadSNP19202    | <i>Desi</i>      | Ca_Desig_denovo              | 21091806                       | (A/G)       |
| 43608       | CadSNP19203    | <i>Desi</i>      | Ca_Desig_denovo              | 21091820                       | (C/T)       |
| 43609       | CadSNP19204    | <i>Desi</i>      | Ca_Desig_denovo              | 21100769                       | (T/G)       |
| 43610       | CadSNP19205    | <i>Desi</i>      | Ca_Desig_denovo              | 21107123                       | (C/T)       |
| 43611       | CadSNP19206    | <i>Desi</i>      | Ca_Desig_denovo              | 21107126                       | (C/T)       |
| 43612       | CadSNP19207    | <i>Desi</i>      | Ca_Desig_denovo              | 21107916                       | (A/G)       |
| 43613       | CadSNP19208    | <i>Desi</i>      | Ca_Desig_denovo              | 21109289                       | (A/G)       |
| 43614       | CadSNP19209    | <i>Desi</i>      | Ca_Desig_denovo              | 21110367                       | (C/T)       |
| 43615       | CadSNP19210    | <i>Desi</i>      | Ca_Desig_denovo              | 21112046                       | (G/A)       |
| 43616       | CadSNP19211    | <i>Desi</i>      | Ca_Desig_denovo              | 21113045                       | (A/G)       |
| 43617       | CadSNP19212    | <i>Desi</i>      | Ca_Desig_denovo              | 21115766                       | (G/C)       |
| 43618       | CadSNP19213    | <i>Desi</i>      | Ca_Desig_denovo              | 21117737                       | (C/T)       |
| 43619       | CadSNP19214    | <i>Desi</i>      | Ca_Desig_denovo              | 21117764                       | (C/G)       |
| 43620       | CadSNP19215    | <i>Desi</i>      | Ca_Desig_denovo              | 21124530                       | (A/G)       |
| 43621       | CadSNP19216    | <i>Desi</i>      | Ca_Desig_denovo              | 21124557                       | (T/G)       |
| 43622       | CadSNP19217    | <i>Desi</i>      | Ca_Desig_denovo              | 21128588                       | (T/C)       |
| 43623       | CadSNP19218    | <i>Desi</i>      | Ca_Desig_denovo              | 21128657                       | (T/G)       |

| <b>S.N.</b> | <b>SNP IDs</b> | <b>Cultivars</b> | <b>Chromosomes/scaffolds</b> | <b>Physical positions (bp)</b> | <b>SNPs</b> |
|-------------|----------------|------------------|------------------------------|--------------------------------|-------------|
| 43624       | CadSNP19219    | <i>Desi</i>      | Ca_Desig_denovo              | 21128958                       | (C/T)       |
| 43625       | CadSNP19220    | <i>Desi</i>      | Ca_Desig_denovo              | 21128968                       | (G/A)       |
| 43626       | CadSNP19221    | <i>Desi</i>      | Ca_Desig_denovo              | 21130263                       | (T/C)       |
| 43627       | CadSNP19222    | <i>Desi</i>      | Ca_Desig_denovo              | 21130280                       | (G/C)       |
| 43628       | CadSNP19223    | <i>Desi</i>      | Ca_Desig_denovo              | 21132057                       | (C/A)       |
| 43629       | CadSNP19224    | <i>Desi</i>      | Ca_Desig_denovo              | 21132087                       | (A/G)       |
| 43630       | CadSNP19225    | <i>Desi</i>      | Ca_Desig_denovo              | 21137478                       | (G/C)       |
| 43631       | CadSNP19226    | <i>Desi</i>      | Ca_Desig_denovo              | 21147998                       | (G/A)       |
| 43632       | CadSNP19227    | <i>Desi</i>      | Ca_Desig_denovo              | 21148007                       | (G/C)       |
| 43633       | CadSNP19228    | <i>Desi</i>      | Ca_Desig_denovo              | 21152755                       | (A/C)       |
| 43634       | CadSNP19229    | <i>Desi</i>      | Ca_Desig_denovo              | 21156291                       | (G/T)       |
| 43635       | CadSNP19230    | <i>Desi</i>      | Ca_Desig_denovo              | 21158760                       | (C/G)       |
| 43636       | CadSNP19231    | <i>Desi</i>      | Ca_Desig_denovo              | 21158782                       | (C/A)       |
| 43637       | CadSNP19232    | <i>Desi</i>      | Ca_Desig_denovo              | 21158917                       | (C/T)       |
| 43638       | CadSNP19233    | <i>Desi</i>      | Ca_Desig_denovo              | 21158933                       | (T/A)       |
| 43639       | CadSNP19234    | <i>Desi</i>      | Ca_Desig_denovo              | 21162466                       | (T/A)       |
| 43640       | CadSNP19235    | <i>Desi</i>      | Ca_Desig_denovo              | 21164231                       | (C/T)       |
| 43641       | CadSNP19236    | <i>Desi</i>      | Ca_Desig_denovo              | 21164234                       | (T/G)       |
| 43642       | CadSNP19237    | <i>Desi</i>      | Ca_Desig_denovo              | 21164583                       | (C/G)       |
| 43643       | CadSNP19238    | <i>Desi</i>      | Ca_Desig_denovo              | 21166343                       | (G/C)       |
| 43644       | CadSNP19239    | <i>Desi</i>      | Ca_Desig_denovo              | 21167192                       | (C/T)       |
| 43645       | CadSNP19240    | <i>Desi</i>      | Ca_Desig_denovo              | 21168492                       | (C/G)       |
| 43646       | CadSNP19241    | <i>Desi</i>      | Ca_Desig_denovo              | 21169204                       | (A/G)       |
| 43647       | CadSNP19242    | <i>Desi</i>      | Ca_Desig_denovo              | 21173618                       | (G/A)       |
| 43648       | CadSNP19243    | <i>Desi</i>      | Ca_Desig_denovo              | 21178480                       | (G/A)       |
| 43649       | CadSNP19244    | <i>Desi</i>      | Ca_Desig_denovo              | 21185364                       | (T/A)       |
| 43650       | CadSNP19245    | <i>Desi</i>      | Ca_Desig_denovo              | 21185823                       | (G/A)       |
| 43651       | CadSNP19246    | <i>Desi</i>      | Ca_Desig_denovo              | 21185835                       | (G/C)       |
| 43652       | CadSNP19247    | <i>Desi</i>      | Ca_Desig_denovo              | 21194249                       | (C/T)       |
| 43653       | CadSNP19248    | <i>Desi</i>      | Ca_Desig_denovo              | 21206282                       | (A/C)       |
| 43654       | CadSNP19249    | <i>Desi</i>      | Ca_Desig_denovo              | 21206285                       | (C/G)       |
| 43655       | CadSNP19250    | <i>Desi</i>      | Ca_Desig_denovo              | 21207433                       | (T/C)       |
| 43656       | CadSNP19251    | <i>Desi</i>      | Ca_Desig_denovo              | 21209588                       | (G/A)       |
| 43657       | CadSNP19252    | <i>Desi</i>      | Ca_Desig_denovo              | 21209604                       | (T/C)       |
| 43658       | CadSNP19253    | <i>Desi</i>      | Ca_Desig_denovo              | 21209615                       | (T/C)       |
| 43659       | CadSNP19254    | <i>Desi</i>      | Ca_Desig_denovo              | 21213800                       | (G/A)       |
| 43660       | CadSNP19255    | <i>Desi</i>      | Ca_Desig_denovo              | 21226445                       | (C/G)       |
| 43661       | CadSNP19256    | <i>Desi</i>      | Ca_Desig_denovo              | 21226463                       | (T/C)       |

| <b>S.N.</b> | <b>SNP IDs</b> | <b>Cultivars</b> | <b>Chromosomes/scaffolds</b> | <b>Physical positions (bp)</b> | <b>SNPs</b> |
|-------------|----------------|------------------|------------------------------|--------------------------------|-------------|
| 43662       | CadSNP19257    | <i>Desi</i>      | Ca_Desig_denovo              | 21227443                       | (C/G)       |
| 43663       | CadSNP19258    | <i>Desi</i>      | Ca_Desig_denovo              | 21227455                       | (C/T)       |
| 43664       | CadSNP19259    | <i>Desi</i>      | Ca_Desig_denovo              | 21233957                       | (A/G)       |
| 43665       | CadSNP19260    | <i>Desi</i>      | Ca_Desig_denovo              | 21234003                       | (G/A)       |
| 43666       | CadSNP19261    | <i>Desi</i>      | Ca_Desig_denovo              | 21234654                       | (T/C)       |
| 43667       | CadSNP19262    | <i>Desi</i>      | Ca_Desig_denovo              | 21235800                       | (G/C)       |
| 43668       | CadSNP19263    | <i>Desi</i>      | Ca_Desig_denovo              | 21243761                       | (C/T)       |
| 43669       | CadSNP19264    | <i>Desi</i>      | Ca_Desig_denovo              | 21243796                       | (G/C)       |
| 43670       | CadSNP19265    | <i>Desi</i>      | Ca_Desig_denovo              | 21246625                       | (G/C)       |
| 43671       | CadSNP19266    | <i>Desi</i>      | Ca_Desig_denovo              | 21246681                       | (A/G)       |
| 43672       | CadSNP19267    | <i>Desi</i>      | Ca_Desig_denovo              | 21248192                       | (T/A)       |
| 43673       | CadSNP19268    | <i>Desi</i>      | Ca_Desig_denovo              | 21250228                       | (T/C)       |
| 43674       | CadSNP19269    | <i>Desi</i>      | Ca_Desig_denovo              | 21252688                       | (C/G)       |
| 43675       | CadSNP19270    | <i>Desi</i>      | Ca_Desig_denovo              | 21252715                       | (C/T)       |
| 43676       | CadSNP19271    | <i>Desi</i>      | Ca_Desig_denovo              | 21264024                       | (G/C)       |
| 43677       | CadSNP19272    | <i>Desi</i>      | Ca_Desig_denovo              | 21270992                       | (G/A)       |
| 43678       | CadSNP19273    | <i>Desi</i>      | Ca_Desig_denovo              | 21276403                       | (C/G)       |
| 43679       | CadSNP19274    | <i>Desi</i>      | Ca_Desig_denovo              | 21286127                       | (G/T)       |
| 43680       | CadSNP19275    | <i>Desi</i>      | Ca_Desig_denovo              | 21288667                       | (C/A)       |
| 43681       | CadSNP19276    | <i>Desi</i>      | Ca_Desig_denovo              | 21290441                       | (T/A)       |
| 43682       | CadSNP19277    | <i>Desi</i>      | Ca_Desig_denovo              | 21290443                       | (T/C)       |
| 43683       | CadSNP19278    | <i>Desi</i>      | Ca_Desig_denovo              | 21292578                       | (T/C)       |
| 43684       | CadSNP19279    | <i>Desi</i>      | Ca_Desig_denovo              | 21292593                       | (G/T)       |
| 43685       | CadSNP19280    | <i>Desi</i>      | Ca_Desig_denovo              | 21294260                       | (T/C)       |
| 43686       | CadSNP19281    | <i>Desi</i>      | Ca_Desig_denovo              | 21294261                       | (T/G)       |
| 43687       | CadSNP19282    | <i>Desi</i>      | Ca_Desig_denovo              | 21317208                       | (G/T)       |
| 43688       | CadSNP19283    | <i>Desi</i>      | Ca_Desig_denovo              | 21317226                       | (C/T)       |
| 43689       | CadSNP19284    | <i>Desi</i>      | Ca_Desig_denovo              | 21322972                       | (C/T)       |
| 43690       | CadSNP19285    | <i>Desi</i>      | Ca_Desig_denovo              | 21326366                       | (A/G)       |
| 43691       | CadSNP19286    | <i>Desi</i>      | Ca_Desig_denovo              | 21329848                       | (T/C)       |
| 43692       | CadSNP19287    | <i>Desi</i>      | Ca_Desig_denovo              | 21329856                       | (A/G)       |
| 43693       | CadSNP19288    | <i>Desi</i>      | Ca_Desig_denovo              | 21332804                       | (T/G)       |
| 43694       | CadSNP19289    | <i>Desi</i>      | Ca_Desig_denovo              | 21332820                       | (G/C)       |
| 43695       | CadSNP19290    | <i>Desi</i>      | Ca_Desig_denovo              | 21335404                       | (A/G)       |
| 43696       | CadSNP19291    | <i>Desi</i>      | Ca_Desig_denovo              | 21335405                       | (A/T)       |
| 43697       | CadSNP19292    | <i>Desi</i>      | Ca_Desig_denovo              | 21335422                       | (C/G)       |
| 43698       | CadSNP19293    | <i>Desi</i>      | Ca_Desig_denovo              | 21337123                       | (G/A)       |
| 43699       | CadSNP19294    | <i>Desi</i>      | Ca_Desig_denovo              | 21337194                       | (A/T)       |



| <b>S.N.</b> | <b>SNP IDs</b> | <b>Cultivars</b> | <b>Chromosomes/scaffolds</b> | <b>Physical positions (bp)</b> | <b>SNPs</b> |
|-------------|----------------|------------------|------------------------------|--------------------------------|-------------|
| 43700       | CadSNP19295    | <i>Desi</i>      | Ca_Desig_denovo              | 21340636                       | (A/C)       |
| 43701       | CadSNP19296    | <i>Desi</i>      | Ca_Desig_denovo              | 21342349                       | (A/G)       |
| 43702       | CadSNP19297    | <i>Desi</i>      | Ca_Desig_denovo              | 21343609                       | (G/A)       |
| 43703       | CadSNP19298    | <i>Desi</i>      | Ca_Desig_denovo              | 21347086                       | (C/G)       |
| 43704       | CadSNP19299    | <i>Desi</i>      | Ca_Desig_denovo              | 21348482                       | (G/A)       |
| 43705       | CadSNP19300    | <i>Desi</i>      | Ca_Desig_denovo              | 21351277                       | (A/G)       |
| 43706       | CadSNP19301    | <i>Desi</i>      | Ca_Desig_denovo              | 21356292                       | (C/T)       |
| 43707       | CadSNP19302    | <i>Desi</i>      | Ca_Desig_denovo              | 21357473                       | (A/T)       |
| 43708       | CadSNP19303    | <i>Desi</i>      | Ca_Desig_denovo              | 21361752                       | (T/C)       |
| 43709       | CadSNP19304    | <i>Desi</i>      | Ca_Desig_denovo              | 21362405                       | (G/A)       |
| 43710       | CadSNP19305    | <i>Desi</i>      | Ca_Desig_denovo              | 21362432                       | (T/C)       |
| 43711       | CadSNP19306    | <i>Desi</i>      | Ca_Desig_denovo              | 21364090                       | (T/C)       |
| 43712       | CadSNP19307    | <i>Desi</i>      | Ca_Desig_denovo              | 21364831                       | (T/C)       |
| 43713       | CadSNP19308    | <i>Desi</i>      | Ca_Desig_denovo              | 21364870                       | (G/T)       |
| 43714       | CadSNP19309    | <i>Desi</i>      | Ca_Desig_denovo              | 21367087                       | (T/C)       |
| 43715       | CadSNP19310    | <i>Desi</i>      | Ca_Desig_denovo              | 21367897                       | (C/T)       |
| 43716       | CadSNP19311    | <i>Desi</i>      | Ca_Desig_denovo              | 21367945                       | (C/T)       |
| 43717       | CadSNP19312    | <i>Desi</i>      | Ca_Desig_denovo              | 21369654                       | (T/C)       |
| 43718       | CadSNP19313    | <i>Desi</i>      | Ca_Desig_denovo              | 21369657                       | (G/A)       |
| 43719       | CadSNP19314    | <i>Desi</i>      | Ca_Desig_denovo              | 21375314                       | (A/G)       |
| 43720       | CadSNP19315    | <i>Desi</i>      | Ca_Desig_denovo              | 21375381                       | (A/C)       |
| 43721       | CadSNP19316    | <i>Desi</i>      | Ca_Desig_denovo              | 21385394                       | (T/G)       |
| 43722       | CadSNP19317    | <i>Desi</i>      | Ca_Desig_denovo              | 21395207                       | (A/C)       |
| 43723       | CadSNP19318    | <i>Desi</i>      | Ca_Desig_denovo              | 21399080                       | (G/C)       |
| 43724       | CadSNP19319    | <i>Desi</i>      | Ca_Desig_denovo              | 21399098                       | (A/C)       |
| 43725       | CadSNP19320    | <i>Desi</i>      | Ca_Desig_denovo              | 21400510                       | (T/C)       |
| 43726       | CadSNP19321    | <i>Desi</i>      | Ca_Desig_denovo              | 21404371                       | (T/C)       |
| 43727       | CadSNP19322    | <i>Desi</i>      | Ca_Desig_denovo              | 21406619                       | (A/T)       |
| 43728       | CadSNP19323    | <i>Desi</i>      | Ca_Desig_denovo              | 21406646                       | (A/G)       |
| 43729       | CadSNP19324    | <i>Desi</i>      | Ca_Desig_denovo              | 21416423                       | (A/G)       |
| 43730       | CadSNP19325    | <i>Desi</i>      | Ca_Desig_denovo              | 21416462                       | (G/A)       |
| 43731       | CadSNP19326    | <i>Desi</i>      | Ca_Desig_denovo              | 21423214                       | (G/A)       |
| 43732       | CadSNP19327    | <i>Desi</i>      | Ca_Desig_denovo              | 21423411                       | (G/A)       |
| 43733       | CadSNP19328    | <i>Desi</i>      | Ca_Desig_denovo              | 21423425                       | (C/G)       |
| 43734       | CadSNP19329    | <i>Desi</i>      | Ca_Desig_denovo              | 21433174                       | (C/T)       |
| 43735       | CadSNP19330    | <i>Desi</i>      | Ca_Desig_denovo              | 21433240                       | (C/T)       |
| 43736       | CadSNP19331    | <i>Desi</i>      | Ca_Desig_denovo              | 21438692                       | (A/G)       |
| 43737       | CadSNP19332    | <i>Desi</i>      | Ca_Desig_denovo              | 21446604                       | (G/A)       |

| <b>S.N.</b> | <b>SNP IDs</b> | <b>Cultivars</b> | <b>Chromosomes/scaffolds</b> | <b>Physical positions (bp)</b> | <b>SNPs</b> |
|-------------|----------------|------------------|------------------------------|--------------------------------|-------------|
| 43738       | CadSNP19333    | <i>Desi</i>      | Ca_Desig_denovo              | 21450772                       | (C/A)       |
| 43739       | CadSNP19334    | <i>Desi</i>      | Ca_Desig_denovo              | 21450969                       | (T/C)       |
| 43740       | CadSNP19335    | <i>Desi</i>      | Ca_Desig_denovo              | 21451298                       | (T/C)       |
| 43741       | CadSNP19336    | <i>Desi</i>      | Ca_Desig_denovo              | 21451321                       | (C/A)       |
| 43742       | CadSNP19337    | <i>Desi</i>      | Ca_Desig_denovo              | 21458994                       | (C/G)       |
| 43743       | CadSNP19338    | <i>Desi</i>      | Ca_Desig_denovo              | 21458995                       | (G/A)       |
| 43744       | CadSNP19339    | <i>Desi</i>      | Ca_Desig_denovo              | 21461543                       | (C/G)       |
| 43745       | CadSNP19340    | <i>Desi</i>      | Ca_Desig_denovo              | 21461575                       | (G/A)       |
| 43746       | CadSNP19341    | <i>Desi</i>      | Ca_Desig_denovo              | 21466027                       | (T/C)       |
| 43747       | CadSNP19342    | <i>Desi</i>      | Ca_Desig_denovo              | 21470564                       | (C/T)       |
| 43748       | CadSNP19343    | <i>Desi</i>      | Ca_Desig_denovo              | 21470963                       | (T/G)       |
| 43749       | CadSNP19344    | <i>Desi</i>      | Ca_Desig_denovo              | 21473895                       | (A/C)       |
| 43750       | CadSNP19345    | <i>Desi</i>      | Ca_Desig_denovo              | 21473961                       | (C/G)       |
| 43751       | CadSNP19346    | <i>Desi</i>      | Ca_Desig_denovo              | 21475314                       | (C/T)       |
| 43752       | CadSNP19347    | <i>Desi</i>      | Ca_Desig_denovo              | 21482747                       | (T/G)       |
| 43753       | CadSNP19348    | <i>Desi</i>      | Ca_Desig_denovo              | 21484700                       | (G/A)       |
| 43754       | CadSNP19349    | <i>Desi</i>      | Ca_Desig_denovo              | 21486849                       | (A/G)       |
| 43755       | CadSNP19350    | <i>Desi</i>      | Ca_Desig_denovo              | 21486850                       | (T/C)       |
| 43756       | CadSNP19351    | <i>Desi</i>      | Ca_Desig_denovo              | 21487181                       | (C/T)       |
| 43757       | CadSNP19352    | <i>Desi</i>      | Ca_Desig_denovo              | 21487472                       | (G/A)       |
| 43758       | CadSNP19353    | <i>Desi</i>      | Ca_Desig_denovo              | 21488314                       | (C/T)       |
| 43759       | CadSNP19354    | <i>Desi</i>      | Ca_Desig_denovo              | 21488338                       | (T/C)       |
| 43760       | CadSNP19355    | <i>Desi</i>      | Ca_Desig_denovo              | 21496231                       | (T/C)       |
| 43761       | CadSNP19356    | <i>Desi</i>      | Ca_Desig_denovo              | 21496414                       | (A/G)       |
| 43762       | CadSNP19357    | <i>Desi</i>      | Ca_Desig_denovo              | 21497720                       | (C/G)       |
| 43763       | CadSNP19358    | <i>Desi</i>      | Ca_Desig_denovo              | 21497731                       | (T/C)       |
| 43764       | CadSNP19359    | <i>Desi</i>      | Ca_Desig_denovo              | 21504917                       | (G/C)       |
| 43765       | CadSNP19360    | <i>Desi</i>      | Ca_Desig_denovo              | 21508087                       | (C/T)       |
| 43766       | CadSNP19361    | <i>Desi</i>      | Ca_Desig_denovo              | 21509550                       | (T/C)       |
| 43767       | CadSNP19362    | <i>Desi</i>      | Ca_Desig_denovo              | 21509596                       | (C/T)       |
| 43768       | CadSNP19363    | <i>Desi</i>      | Ca_Desig_denovo              | 21509654                       | (A/C)       |
| 43769       | CadSNP19364    | <i>Desi</i>      | Ca_Desig_denovo              | 21517527                       | (G/T)       |
| 43770       | CadSNP19365    | <i>Desi</i>      | Ca_Desig_denovo              | 21519862                       | (T/G)       |
| 43771       | CadSNP19366    | <i>Desi</i>      | Ca_Desig_denovo              | 21521038                       | (T/G)       |
| 43772       | CadSNP19367    | <i>Desi</i>      | Ca_Desig_denovo              | 21533146                       | (G/T)       |
| 43773       | CadSNP19368    | <i>Desi</i>      | Ca_Desig_denovo              | 21533200                       | (G/C)       |
| 43774       | CadSNP19369    | <i>Desi</i>      | Ca_Desig_denovo              | 21538213                       | (G/A)       |
| 43775       | CadSNP19370    | <i>Desi</i>      | Ca_Desig_denovo              | 21538900                       | (A/T)       |

| <b>S.N.</b> | <b>SNP IDs</b> | <b>Cultivars</b> | <b>Chromosomes/scaffolds</b> | <b>Physical positions (bp)</b> | <b>SNPs</b> |
|-------------|----------------|------------------|------------------------------|--------------------------------|-------------|
| 43776       | CadSNP19371    | <i>Desi</i>      | Ca_Desig_denovo              | 21554904                       | (C/T)       |
| 43777       | CadSNP19372    | <i>Desi</i>      | Ca_Desig_denovo              | 21558981                       | (A/G)       |
| 43778       | CadSNP19373    | <i>Desi</i>      | Ca_Desig_denovo              | 21559705                       | (C/T)       |
| 43779       | CadSNP19374    | <i>Desi</i>      | Ca_Desig_denovo              | 21561506                       | (C/T)       |
| 43780       | CadSNP19375    | <i>Desi</i>      | Ca_Desig_denovo              | 21567335                       | (A/T)       |
| 43781       | CadSNP19376    | <i>Desi</i>      | Ca_Desig_denovo              | 21569777                       | (T/C)       |
| 43782       | CadSNP19377    | <i>Desi</i>      | Ca_Desig_denovo              | 21574567                       | (A/G)       |
| 43783       | CadSNP19378    | <i>Desi</i>      | Ca_Desig_denovo              | 21574578                       | (G/A)       |
| 43784       | CadSNP19379    | <i>Desi</i>      | Ca_Desig_denovo              | 21578623                       | (G/C)       |
| 43785       | CadSNP19380    | <i>Desi</i>      | Ca_Desig_denovo              | 21584757                       | (G/A)       |
| 43786       | CadSNP19381    | <i>Desi</i>      | Ca_Desig_denovo              | 21584823                       | (A/G)       |
| 43787       | CadSNP19382    | <i>Desi</i>      | Ca_Desig_denovo              | 21591726                       | (C/T)       |
| 43788       | CadSNP19383    | <i>Desi</i>      | Ca_Desig_denovo              | 21594891                       | (A/G)       |
| 43789       | CadSNP19384    | <i>Desi</i>      | Ca_Desig_denovo              | 21609716                       | (A/G)       |
| 43790       | CadSNP19385    | <i>Desi</i>      | Ca_Desig_denovo              | 21614548                       | (G/A)       |
| 43791       | CadSNP19386    | <i>Desi</i>      | Ca_Desig_denovo              | 21614576                       | (T/C)       |
| 43792       | CadSNP19387    | <i>Desi</i>      | Ca_Desig_denovo              | 21616462                       | (G/A)       |
| 43793       | CadSNP19388    | <i>Desi</i>      | Ca_Desig_denovo              | 21621937                       | (A/G)       |
| 43794       | CadSNP19389    | <i>Desi</i>      | Ca_Desig_denovo              | 21621943                       | (T/G)       |
| 43795       | CadSNP19390    | <i>Desi</i>      | Ca_Desig_denovo              | 21624205                       | (C/G)       |
| 43796       | CadSNP19391    | <i>Desi</i>      | Ca_Desig_denovo              | 21624265                       | (G/C)       |
| 43797       | CadSNP19392    | <i>Desi</i>      | Ca_Desig_denovo              | 21647437                       | (C/T)       |
| 43798       | CadSNP19393    | <i>Desi</i>      | Ca_Desig_denovo              | 21647461                       | (T/C)       |
| 43799       | CadSNP19394    | <i>Desi</i>      | Ca_Desig_denovo              | 21659371                       | (T/C)       |
| 43800       | CadSNP19395    | <i>Desi</i>      | Ca_Desig_denovo              | 21660365                       | (T/C)       |
| 43801       | CadSNP19396    | <i>Desi</i>      | Ca_Desig_denovo              | 21660377                       | (C/T)       |
| 43802       | CadSNP19397    | <i>Desi</i>      | Ca_Desig_denovo              | 21660662                       | (C/T)       |
| 43803       | CadSNP19398    | <i>Desi</i>      | Ca_Desig_denovo              | 21660868                       | (G/T)       |
| 43804       | CadSNP19399    | <i>Desi</i>      | Ca_Desig_denovo              | 21660890                       | (G/A)       |
| 43805       | CadSNP19400    | <i>Desi</i>      | Ca_Desig_denovo              | 21663377                       | (C/T)       |
| 43806       | CadSNP19401    | <i>Desi</i>      | Ca_Desig_denovo              | 21667711                       | (G/C)       |
| 43807       | CadSNP19402    | <i>Desi</i>      | Ca_Desig_denovo              | 21669948                       | (G/A)       |
| 43808       | CadSNP19403    | <i>Desi</i>      | Ca_Desig_denovo              | 21669949                       | (T/C)       |
| 43809       | CadSNP19404    | <i>Desi</i>      | Ca_Desig_denovo              | 21670918                       | (A/G)       |
| 43810       | CadSNP19405    | <i>Desi</i>      | Ca_Desig_denovo              | 21670919                       | (G/A)       |
| 43811       | CadSNP19406    | <i>Desi</i>      | Ca_Desig_denovo              | 21682601                       | (C/A)       |
| 43812       | CadSNP19407    | <i>Desi</i>      | Ca_Desig_denovo              | 21682634                       | (A/G)       |
| 43813       | CadSNP19408    | <i>Desi</i>      | Ca_Desig_denovo              | 21686175                       | (C/A)       |

| <b>S.N.</b> | <b>SNP IDs</b> | <b>Cultivars</b> | <b>Chromosomes/scaffolds</b> | <b>Physical positions (bp)</b> | <b>SNPs</b> |
|-------------|----------------|------------------|------------------------------|--------------------------------|-------------|
| 43814       | CadSNP19409    | <i>Desi</i>      | Ca_Desig_denovo              | 21696864                       | (C/T)       |
| 43815       | CadSNP19410    | <i>Desi</i>      | Ca_Desig_denovo              | 21706849                       | (A/C)       |
| 43816       | CadSNP19411    | <i>Desi</i>      | Ca_Desig_denovo              | 21707230                       | (G/A)       |
| 43817       | CadSNP19412    | <i>Desi</i>      | Ca_Desig_denovo              | 21712855                       | (C/T)       |
| 43818       | CadSNP19413    | <i>Desi</i>      | Ca_Desig_denovo              | 21717787                       | (C/T)       |
| 43819       | CadSNP19414    | <i>Desi</i>      | Ca_Desig_denovo              | 21717808                       | (T/A)       |
| 43820       | CadSNP19415    | <i>Desi</i>      | Ca_Desig_denovo              | 21735986                       | (C/G)       |
| 43821       | CadSNP19416    | <i>Desi</i>      | Ca_Desig_denovo              | 21740627                       | (A/G)       |
| 43822       | CadSNP19417    | <i>Desi</i>      | Ca_Desig_denovo              | 21740915                       | (G/A)       |
| 43823       | CadSNP19418    | <i>Desi</i>      | Ca_Desig_denovo              | 21740927                       | (A/G)       |
| 43824       | CadSNP19419    | <i>Desi</i>      | Ca_Desig_denovo              | 21743264                       | (C/G)       |
| 43825       | CadSNP19420    | <i>Desi</i>      | Ca_Desig_denovo              | 21749308                       | (T/G)       |
| 43826       | CadSNP19421    | <i>Desi</i>      | Ca_Desig_denovo              | 21749329                       | (T/C)       |
| 43827       | CadSNP19422    | <i>Desi</i>      | Ca_Desig_denovo              | 21761182                       | (G/T)       |
| 43828       | CadSNP19423    | <i>Desi</i>      | Ca_Desig_denovo              | 21761236                       | (G/C)       |
| 43829       | CadSNP19424    | <i>Desi</i>      | Ca_Desig_denovo              | 21762208                       | (A/G)       |
| 43830       | CadSNP19425    | <i>Desi</i>      | Ca_Desig_denovo              | 21762851                       | (G/A)       |
| 43831       | CadSNP19426    | <i>Desi</i>      | Ca_Desig_denovo              | 21765194                       | (T/C)       |
| 43832       | CadSNP19427    | <i>Desi</i>      | Ca_Desig_denovo              | 21765243                       | (C/A)       |
| 43833       | CadSNP19428    | <i>Desi</i>      | Ca_Desig_denovo              | 21770495                       | (G/A)       |
| 43834       | CadSNP19429    | <i>Desi</i>      | Ca_Desig_denovo              | 21770501                       | (C/T)       |
| 43835       | CadSNP19430    | <i>Desi</i>      | Ca_Desig_denovo              | 21774675                       | (G/A)       |
| 43836       | CadSNP19431    | <i>Desi</i>      | Ca_Desig_denovo              | 21777606                       | (T/C)       |
| 43837       | CadSNP19432    | <i>Desi</i>      | Ca_Desig_denovo              | 21781092                       | (G/C)       |
| 43838       | CadSNP19433    | <i>Desi</i>      | Ca_Desig_denovo              | 21781095                       | (T/C)       |
| 43839       | CadSNP19434    | <i>Desi</i>      | Ca_Desig_denovo              | 21781844                       | (A/G)       |
| 43840       | CadSNP19435    | <i>Desi</i>      | Ca_Desig_denovo              | 21781866                       | (C/T)       |
| 43841       | CadSNP19436    | <i>Desi</i>      | Ca_Desig_denovo              | 21783980                       | (C/T)       |
| 43842       | CadSNP19437    | <i>Desi</i>      | Ca_Desig_denovo              | 21784548                       | (G/A)       |
| 43843       | CadSNP19438    | <i>Desi</i>      | Ca_Desig_denovo              | 21784590                       | (C/G)       |
| 43844       | CadSNP19439    | <i>Desi</i>      | Ca_Desig_denovo              | 21796049                       | (C/G)       |
| 43845       | CadSNP19440    | <i>Desi</i>      | Ca_Desig_denovo              | 21800553                       | (T/C)       |
| 43846       | CadSNP19441    | <i>Desi</i>      | Ca_Desig_denovo              | 21800555                       | (G/C)       |
| 43847       | CadSNP19442    | <i>Desi</i>      | Ca_Desig_denovo              | 21800825                       | (G/A)       |
| 43848       | CadSNP19443    | <i>Desi</i>      | Ca_Desig_denovo              | 21801230                       | (A/G)       |
| 43849       | CadSNP19444    | <i>Desi</i>      | Ca_Desig_denovo              | 21803290                       | (G/A)       |
| 43850       | CadSNP19445    | <i>Desi</i>      | Ca_Desig_denovo              | 21812623                       | (T/C)       |
| 43851       | CadSNP19446    | <i>Desi</i>      | Ca_Desig_denovo              | 21813561                       | (A/G)       |

| <b>S.N.</b> | <b>SNP IDs</b> | <b>Cultivars</b> | <b>Chromosomes/scaffolds</b> | <b>Physical positions (bp)</b> | <b>SNPs</b> |
|-------------|----------------|------------------|------------------------------|--------------------------------|-------------|
| 43852       | CadSNP19447    | <i>Desi</i>      | Ca_Desig_denovo              | 21816413                       | (T/C)       |
| 43853       | CadSNP19448    | <i>Desi</i>      | Ca_Desig_denovo              | 21816416                       | (A/G)       |
| 43854       | CadSNP19449    | <i>Desi</i>      | Ca_Desig_denovo              | 21818441                       | (T/C)       |
| 43855       | CadSNP19450    | <i>Desi</i>      | Ca_Desig_denovo              | 21818451                       | (G/A)       |
| 43856       | CadSNP19451    | <i>Desi</i>      | Ca_Desig_denovo              | 21821465                       | (G/A)       |
| 43857       | CadSNP19452    | <i>Desi</i>      | Ca_Desig_denovo              | 21821929                       | (T/C)       |
| 43858       | CadSNP19453    | <i>Desi</i>      | Ca_Desig_denovo              | 21821983                       | (C/T)       |
| 43859       | CadSNP19454    | <i>Desi</i>      | Ca_Desig_denovo              | 21822034                       | (T/C)       |
| 43860       | CadSNP19455    | <i>Desi</i>      | Ca_Desig_denovo              | 21823748                       | (A/C)       |
| 43861       | CadSNP19456    | <i>Desi</i>      | Ca_Desig_denovo              | 21824997                       | (A/T)       |
| 43862       | CadSNP19457    | <i>Desi</i>      | Ca_Desig_denovo              | 21825041                       | (G/A)       |
| 43863       | CadSNP19458    | <i>Desi</i>      | Ca_Desig_denovo              | 21836888                       | (T/C)       |
| 43864       | CadSNP19459    | <i>Desi</i>      | Ca_Desig_denovo              | 21837575                       | (A/G)       |
| 43865       | CadSNP19460    | <i>Desi</i>      | Ca_Desig_denovo              | 21840507                       | (T/C)       |
| 43866       | CadSNP19461    | <i>Desi</i>      | Ca_Desig_denovo              | 21840543                       | (C/A)       |
| 43867       | CadSNP19462    | <i>Desi</i>      | Ca_Desig_denovo              | 21844328                       | (C/A)       |
| 43868       | CadSNP19463    | <i>Desi</i>      | Ca_Desig_denovo              | 21844393                       | (G/A)       |
| 43869       | CadSNP19464    | <i>Desi</i>      | Ca_Desig_denovo              | 21852454                       | (T/G)       |
| 43870       | CadSNP19465    | <i>Desi</i>      | Ca_Desig_denovo              | 21852472                       | (C/T)       |
| 43871       | CadSNP19466    | <i>Desi</i>      | Ca_Desig_denovo              | 21860479                       | (A/G)       |
| 43872       | CadSNP19467    | <i>Desi</i>      | Ca_Desig_denovo              | 21867435                       | (G/C)       |
| 43873       | CadSNP19468    | <i>Desi</i>      | Ca_Desig_denovo              | 21869321                       | (C/T)       |
| 43874       | CadSNP19469    | <i>Desi</i>      | Ca_Desig_denovo              | 21874943                       | (C/T)       |
| 43875       | CadSNP19470    | <i>Desi</i>      | Ca_Desig_denovo              | 21875945                       | (C/G)       |
| 43876       | CadSNP19471    | <i>Desi</i>      | Ca_Desig_denovo              | 21877711                       | (C/A)       |
| 43877       | CadSNP19472    | <i>Desi</i>      | Ca_Desig_denovo              | 21884967                       | (A/G)       |
| 43878       | CadSNP19473    | <i>Desi</i>      | Ca_Desig_denovo              | 21887771                       | (A/G)       |
| 43879       | CadSNP19474    | <i>Desi</i>      | Ca_Desig_denovo              | 21889345                       | (A/T)       |
| 43880       | CadSNP19475    | <i>Desi</i>      | Ca_Desig_denovo              | 21890078                       | (G/A)       |
| 43881       | CadSNP19476    | <i>Desi</i>      | Ca_Desig_denovo              | 21890102                       | (C/T)       |
| 43882       | CadSNP19477    | <i>Desi</i>      | Ca_Desig_denovo              | 21894597                       | (G/C)       |
| 43883       | CadSNP19478    | <i>Desi</i>      | Ca_Desig_denovo              | 21896035                       | (G/A)       |
| 43884       | CadSNP19479    | <i>Desi</i>      | Ca_Desig_denovo              | 21896065                       | (T/C)       |
| 43885       | CadSNP19480    | <i>Desi</i>      | Ca_Desig_denovo              | 21900871                       | (T/C)       |
| 43886       | CadSNP19481    | <i>Desi</i>      | Ca_Desig_denovo              | 21900896                       | (G/A)       |
| 43887       | CadSNP19482    | <i>Desi</i>      | Ca_Desig_denovo              | 21912875                       | (C/T)       |
| 43888       | CadSNP19483    | <i>Desi</i>      | Ca_Desig_denovo              | 21916703                       | (C/A)       |
| 43889       | CadSNP19484    | <i>Desi</i>      | Ca_Desig_denovo              | 21919478                       | (G/A)       |

| <b>S.N.</b> | <b>SNP IDs</b> | <b>Cultivars</b> | <b>Chromosomes/scaffolds</b> | <b>Physical positions (bp)</b> | <b>SNPs</b> |
|-------------|----------------|------------------|------------------------------|--------------------------------|-------------|
| 43890       | CadSNP19485    | <i>Desi</i>      | Ca_Desig_denovo              | 21919535                       | (C/G)       |
| 43891       | CadSNP19486    | <i>Desi</i>      | Ca_Desig_denovo              | 21924161                       | (C/T)       |
| 43892       | CadSNP19487    | <i>Desi</i>      | Ca_Desig_denovo              | 21924179                       | (C/T)       |
| 43893       | CadSNP19488    | <i>Desi</i>      | Ca_Desig_denovo              | 21924751                       | (T/C)       |
| 43894       | CadSNP19489    | <i>Desi</i>      | Ca_Desig_denovo              | 21932346                       | (C/G)       |
| 43895       | CadSNP19490    | <i>Desi</i>      | Ca_Desig_denovo              | 21940582                       | (C/T)       |
| 43896       | CadSNP19491    | <i>Desi</i>      | Ca_Desig_denovo              | 21942963                       | (T/G)       |
| 43897       | CadSNP19492    | <i>Desi</i>      | Ca_Desig_denovo              | 21943773                       | (G/T)       |
| 43898       | CadSNP19493    | <i>Desi</i>      | Ca_Desig_denovo              | 21947245                       | (A/G)       |
| 43899       | CadSNP19494    | <i>Desi</i>      | Ca_Desig_denovo              | 21947257                       | (A/T)       |
| 43900       | CadSNP19495    | <i>Desi</i>      | Ca_Desig_denovo              | 21958434                       | (G/A)       |
| 43901       | CadSNP19496    | <i>Desi</i>      | Ca_Desig_denovo              | 21959695                       | (G/T)       |
| 43902       | CadSNP19497    | <i>Desi</i>      | Ca_Desig_denovo              | 21969216                       | (C/A)       |
| 43903       | CadSNP19498    | <i>Desi</i>      | Ca_Desig_denovo              | 21969228                       | (G/C)       |
| 43904       | CadSNP19499    | <i>Desi</i>      | Ca_Desig_denovo              | 21969568                       | (C/G)       |
| 43905       | CadSNP19500    | <i>Desi</i>      | Ca_Desig_denovo              | 21969795                       | (G/T)       |
| 43906       | CadSNP19501    | <i>Desi</i>      | Ca_Desig_denovo              | 21969872                       | (A/G)       |
| 43907       | CadSNP19502    | <i>Desi</i>      | Ca_Desig_denovo              | 21970903                       | (C/A)       |
| 43908       | CadSNP19503    | <i>Desi</i>      | Ca_Desig_denovo              | 21972814                       | (C/T)       |
| 43909       | CadSNP19504    | <i>Desi</i>      | Ca_Desig_denovo              | 21976377                       | (C/T)       |
| 43910       | CadSNP19505    | <i>Desi</i>      | Ca_Desig_denovo              | 21976411                       | (C/T)       |
| 43911       | CadSNP19506    | <i>Desi</i>      | Ca_Desig_denovo              | 21976940                       | (C/G)       |
| 43912       | CadSNP19507    | <i>Desi</i>      | Ca_Desig_denovo              | 21992784                       | (T/A)       |
| 43913       | CadSNP19508    | <i>Desi</i>      | Ca_Desig_denovo              | 21992812                       | (T/G)       |
| 43914       | CadSNP19509    | <i>Desi</i>      | Ca_Desig_denovo              | 22014511                       | (C/T)       |
| 43915       | CadSNP19510    | <i>Desi</i>      | Ca_Desig_denovo              | 22014526                       | (T/C)       |
| 43916       | CadSNP19511    | <i>Desi</i>      | Ca_Desig_denovo              | 22039566                       | (C/G)       |
| 43917       | CadSNP19512    | <i>Desi</i>      | Ca_Desig_denovo              | 22044924                       | (T/C)       |
| 43918       | CadSNP19513    | <i>Desi</i>      | Ca_Desig_denovo              | 22055584                       | (C/T)       |
| 43919       | CadSNP19514    | <i>Desi</i>      | Ca_Desig_denovo              | 22055905                       | (C/G)       |
| 43920       | CadSNP19515    | <i>Desi</i>      | Ca_Desig_denovo              | 22055959                       | (T/G)       |
| 43921       | CadSNP19516    | <i>Desi</i>      | Ca_Desig_denovo              | 22055970                       | (T/G)       |
| 43922       | CadSNP19517    | <i>Desi</i>      | Ca_Desig_denovo              | 22062713                       | (A/T)       |
| 43923       | CadSNP19518    | <i>Desi</i>      | Ca_Desig_denovo              | 22062719                       | (G/A)       |
| 43924       | CadSNP19519    | <i>Desi</i>      | Ca_Desig_denovo              | 22069643                       | (T/G)       |
| 43925       | CadSNP19520    | <i>Desi</i>      | Ca_Desig_denovo              | 22071290                       | (T/C)       |
| 43926       | CadSNP19521    | <i>Desi</i>      | Ca_Desig_denovo              | 22071291                       | (T/C)       |
| 43927       | CadSNP19522    | <i>Desi</i>      | Ca_Desig_denovo              | 22080183                       | (C/G)       |

| <b>S.N.</b> | <b>SNP IDs</b> | <b>Cultivars</b> | <b>Chromosomes/scaffolds</b> | <b>Physical positions (bp)</b> | <b>SNPs</b> |
|-------------|----------------|------------------|------------------------------|--------------------------------|-------------|
| 43928       | CadSNP19523    | <i>Desi</i>      | Ca_Desig_denovo              | 22081236                       | (G/A)       |
| 43929       | CadSNP19524    | <i>Desi</i>      | Ca_Desig_denovo              | 22081972                       | (T/G)       |
| 43930       | CadSNP19525    | <i>Desi</i>      | Ca_Desig_denovo              | 22084106                       | (C/G)       |
| 43931       | CadSNP19526    | <i>Desi</i>      | Ca_Desig_denovo              | 22086887                       | (C/A)       |
| 43932       | CadSNP19527    | <i>Desi</i>      | Ca_Desig_denovo              | 22092560                       | (T/C)       |
| 43933       | CadSNP19528    | <i>Desi</i>      | Ca_Desig_denovo              | 22092599                       | (A/G)       |
| 43934       | CadSNP19529    | <i>Desi</i>      | Ca_Desig_denovo              | 22096564                       | (T/C)       |
| 43935       | CadSNP19530    | <i>Desi</i>      | Ca_Desig_denovo              | 22096601                       | (A/G)       |
| 43936       | CadSNP19531    | <i>Desi</i>      | Ca_Desig_denovo              | 22111867                       | (G/T)       |
| 43937       | CadSNP19532    | <i>Desi</i>      | Ca_Desig_denovo              | 22115188                       | (T/G)       |
| 43938       | CadSNP19533    | <i>Desi</i>      | Ca_Desig_denovo              | 22117293                       | (A/G)       |
| 43939       | CadSNP19534    | <i>Desi</i>      | Ca_Desig_denovo              | 22121179                       | (G/A)       |
| 43940       | CadSNP19535    | <i>Desi</i>      | Ca_Desig_denovo              | 22121239                       | (A/G)       |
| 43941       | CadSNP19536    | <i>Desi</i>      | Ca_Desig_denovo              | 22121316                       | (C/T)       |
| 43942       | CadSNP19537    | <i>Desi</i>      | Ca_Desig_denovo              | 22124086                       | (C/G)       |
| 43943       | CadSNP19538    | <i>Desi</i>      | Ca_Desig_denovo              | 22124092                       | (C/T)       |
| 43944       | CadSNP19539    | <i>Desi</i>      | Ca_Desig_denovo              | 22125941                       | (T/G)       |
| 43945       | CadSNP19540    | <i>Desi</i>      | Ca_Desig_denovo              | 22137876                       | (T/A)       |
| 43946       | CadSNP19541    | <i>Desi</i>      | Ca_Desig_denovo              | 22140080                       | (C/G)       |
| 43947       | CadSNP19542    | <i>Desi</i>      | Ca_Desig_denovo              | 22143402                       | (G/A)       |
| 43948       | CadSNP19543    | <i>Desi</i>      | Ca_Desig_denovo              | 22146848                       | (G/A)       |
| 43949       | CadSNP19544    | <i>Desi</i>      | Ca_Desig_denovo              | 22147498                       | (C/G)       |
| 43950       | CadSNP19545    | <i>Desi</i>      | Ca_Desig_denovo              | 22150873                       | (T/C)       |
| 43951       | CadSNP19546    | <i>Desi</i>      | Ca_Desig_denovo              | 22154384                       | (C/G)       |
| 43952       | CadSNP19547    | <i>Desi</i>      | Ca_Desig_denovo              | 22154405                       | (G/A)       |
| 43953       | CadSNP19548    | <i>Desi</i>      | Ca_Desig_denovo              | 22154408                       | (G/C)       |
| 43954       | CadSNP19549    | <i>Desi</i>      | Ca_Desig_denovo              | 22158666                       | (A/G)       |
| 43955       | CadSNP19550    | <i>Desi</i>      | Ca_Desig_denovo              | 22158717                       | (G/A)       |
| 43956       | CadSNP19551    | <i>Desi</i>      | Ca_Desig_denovo              | 22158731                       | (T/C)       |
| 43957       | CadSNP19552    | <i>Desi</i>      | Ca_Desig_denovo              | 22160702                       | (A/G)       |
| 43958       | CadSNP19553    | <i>Desi</i>      | Ca_Desig_denovo              | 22160895                       | (C/T)       |
| 43959       | CadSNP19554    | <i>Desi</i>      | Ca_Desig_denovo              | 22161073                       | (C/A)       |
| 43960       | CadSNP19555    | <i>Desi</i>      | Ca_Desig_denovo              | 22161085                       | (A/G)       |
| 43961       | CadSNP19556    | <i>Desi</i>      | Ca_Desig_denovo              | 22161912                       | (G/A)       |
| 43962       | CadSNP19557    | <i>Desi</i>      | Ca_Desig_denovo              | 22165034                       | (G/A)       |
| 43963       | CadSNP19558    | <i>Desi</i>      | Ca_Desig_denovo              | 22174573                       | (T/C)       |
| 43964       | CadSNP19559    | <i>Desi</i>      | Ca_Desig_denovo              | 22176245                       | (C/T)       |
| 43965       | CadSNP19560    | <i>Desi</i>      | Ca_Desig_denovo              | 22178758                       | (G/A)       |

| <b>S.N.</b> | <b>SNP IDs</b> | <b>Cultivars</b> | <b>Chromosomes/scaffolds</b> | <b>Physical positions (bp)</b> | <b>SNPs</b> |
|-------------|----------------|------------------|------------------------------|--------------------------------|-------------|
| 43966       | CadSNP19561    | <i>Desi</i>      | Ca_Desig_denovo              | 22178779                       | (C/T)       |
| 43967       | CadSNP19562    | <i>Desi</i>      | Ca_Desig_denovo              | 22181463                       | (C/T)       |
| 43968       | CadSNP19563    | <i>Desi</i>      | Ca_Desig_denovo              | 22181466                       | (C/G)       |
| 43969       | CadSNP19564    | <i>Desi</i>      | Ca_Desig_denovo              | 22187768                       | (A/G)       |
| 43970       | CadSNP19565    | <i>Desi</i>      | Ca_Desig_denovo              | 22189673                       | (A/G)       |
| 43971       | CadSNP19566    | <i>Desi</i>      | Ca_Desig_denovo              | 22190740                       | (T/C)       |
| 43972       | CadSNP19567    | <i>Desi</i>      | Ca_Desig_denovo              | 22190776                       | (T/G)       |
| 43973       | CadSNP19568    | <i>Desi</i>      | Ca_Desig_denovo              | 22194503                       | (A/G)       |
| 43974       | CadSNP19569    | <i>Desi</i>      | Ca_Desig_denovo              | 22198191                       | (C/G)       |
| 43975       | CadSNP19570    | <i>Desi</i>      | Ca_Desig_denovo              | 22198194                       | (G/C)       |
| 43976       | CadSNP19571    | <i>Desi</i>      | Ca_Desig_denovo              | 22203962                       | (A/G)       |
| 43977       | CadSNP19572    | <i>Desi</i>      | Ca_Desig_denovo              | 22204043                       | (C/G)       |
| 43978       | CadSNP19573    | <i>Desi</i>      | Ca_Desig_denovo              | 22209815                       | (T/A)       |
| 43979       | CadSNP19574    | <i>Desi</i>      | Ca_Desig_denovo              | 22209847                       | (A/C)       |
| 43980       | CadSNP19575    | <i>Desi</i>      | Ca_Desig_denovo              | 22211974                       | (C/G)       |
| 43981       | CadSNP19576    | <i>Desi</i>      | Ca_Desig_denovo              | 22223782                       | (T/G)       |
| 43982       | CadSNP19577    | <i>Desi</i>      | Ca_Desig_denovo              | 22226963                       | (T/C)       |
| 43983       | CadSNP19578    | <i>Desi</i>      | Ca_Desig_denovo              | 22227968                       | (T/G)       |
| 43984       | CadSNP19579    | <i>Desi</i>      | Ca_Desig_denovo              | 22230769                       | (A/G)       |
| 43985       | CadSNP19580    | <i>Desi</i>      | Ca_Desig_denovo              | 22237583                       | (G/A)       |
| 43986       | CadSNP19581    | <i>Desi</i>      | Ca_Desig_denovo              | 22237603                       | (G/T)       |
| 43987       | CadSNP19582    | <i>Desi</i>      | Ca_Desig_denovo              | 22246791                       | (C/T)       |
| 43988       | CadSNP19583    | <i>Desi</i>      | Ca_Desig_denovo              | 22258362                       | (G/A)       |
| 43989       | CadSNP19584    | <i>Desi</i>      | Ca_Desig_denovo              | 22258386                       | (G/A)       |
| 43990       | CadSNP19585    | <i>Desi</i>      | Ca_Desig_denovo              | 22260311                       | (A/G)       |
| 43991       | CadSNP19586    | <i>Desi</i>      | Ca_Desig_denovo              | 22260383                       | (T/C)       |
| 43992       | CadSNP19587    | <i>Desi</i>      | Ca_Desig_denovo              | 22271326                       | (A/G)       |
| 43993       | CadSNP19588    | <i>Desi</i>      | Ca_Desig_denovo              | 22271347                       | (C/T)       |
| 43994       | CadSNP19589    | <i>Desi</i>      | Ca_Desig_denovo              | 22272850                       | (G/A)       |
| 43995       | CadSNP19590    | <i>Desi</i>      | Ca_Desig_denovo              | 22276955                       | (C/G)       |
| 43996       | CadSNP19591    | <i>Desi</i>      | Ca_Desig_denovo              | 22277024                       | (A/C)       |
| 43997       | CadSNP19592    | <i>Desi</i>      | Ca_Desig_denovo              | 22280302                       | (A/G)       |
| 43998       | CadSNP19593    | <i>Desi</i>      | Ca_Desig_denovo              | 22282078                       | (G/A)       |
| 43999       | CadSNP19594    | <i>Desi</i>      | Ca_Desig_denovo              | 22282168                       | (C/G)       |
| 44000       | CadSNP19595    | <i>Desi</i>      | Ca_Desig_denovo              | 22282186                       | (C/T)       |
| 44001       | CadSNP19596    | <i>Desi</i>      | Ca_Desig_denovo              | 22282196                       | (G/A)       |
| 44002       | CadSNP19597    | <i>Desi</i>      | Ca_Desig_denovo              | 22282227                       | (G/A)       |
| 44003       | CadSNP19598    | <i>Desi</i>      | Ca_Desig_denovo              | 22284905                       | (G/A)       |



| <b>S.N.</b> | <b>SNP IDs</b> | <b>Cultivars</b> | <b>Chromosomes/scaffolds</b> | <b>Physical positions (bp)</b> | <b>SNPs</b> |
|-------------|----------------|------------------|------------------------------|--------------------------------|-------------|
| 44004       | CadSNP19599    | <i>Desi</i>      | Ca_Desig_denovo              | 22297218                       | (T/A)       |
| 44005       | CadSNP19600    | <i>Desi</i>      | Ca_Desig_denovo              | 22297274                       | (A/G)       |
| 44006       | CadSNP19601    | <i>Desi</i>      | Ca_Desig_denovo              | 22298794                       | (G/T)       |
| 44007       | CadSNP19602    | <i>Desi</i>      | Ca_Desig_denovo              | 22301024                       | (A/C)       |
| 44008       | CadSNP19603    | <i>Desi</i>      | Ca_Desig_denovo              | 22301026                       | (A/G)       |
| 44009       | CadSNP19604    | <i>Desi</i>      | Ca_Desig_denovo              | 22302267                       | (G/A)       |
| 44010       | CadSNP19605    | <i>Desi</i>      | Ca_Desig_denovo              | 22305159                       | (C/T)       |
| 44011       | CadSNP19606    | <i>Desi</i>      | Ca_Desig_denovo              | 22305199                       | (T/C)       |
| 44012       | CadSNP19607    | <i>Desi</i>      | Ca_Desig_denovo              | 22308205                       | (C/T)       |
| 44013       | CadSNP19608    | <i>Desi</i>      | Ca_Desig_denovo              | 22308220                       | (T/C)       |
| 44014       | CadSNP19609    | <i>Desi</i>      | Ca_Desig_denovo              | 22311209                       | (A/C)       |
| 44015       | CadSNP19610    | <i>Desi</i>      | Ca_Desig_denovo              | 22316400                       | (G/C)       |
| 44016       | CadSNP19611    | <i>Desi</i>      | Ca_Desig_denovo              | 22318414                       | (G/T)       |
| 44017       | CadSNP19612    | <i>Desi</i>      | Ca_Desig_denovo              | 22325495                       | (G/A)       |
| 44018       | CadSNP19613    | <i>Desi</i>      | Ca_Desig_denovo              | 22325552                       | (G/A)       |
| 44019       | CadSNP19614    | <i>Desi</i>      | Ca_Desig_denovo              | 22330735                       | (C/T)       |
| 44020       | CadSNP19615    | <i>Desi</i>      | Ca_Desig_denovo              | 22330741                       | (T/C)       |
| 44021       | CadSNP19616    | <i>Desi</i>      | Ca_Desig_denovo              | 22332157                       | (C/T)       |
| 44022       | CadSNP19617    | <i>Desi</i>      | Ca_Desig_denovo              | 22334664                       | (G/C)       |
| 44023       | CadSNP19618    | <i>Desi</i>      | Ca_Desig_denovo              | 22342826                       | (G/A)       |
| 44024       | CadSNP19619    | <i>Desi</i>      | Ca_Desig_denovo              | 22348753                       | (C/T)       |
| 44025       | CadSNP19620    | <i>Desi</i>      | Ca_Desig_denovo              | 22348786                       | (C/A)       |
| 44026       | CadSNP19621    | <i>Desi</i>      | Ca_Desig_denovo              | 22349700                       | (A/G)       |
| 44027       | CadSNP19622    | <i>Desi</i>      | Ca_Desig_denovo              | 22357247                       | (T/G)       |
| 44028       | CadSNP19623    | <i>Desi</i>      | Ca_Desig_denovo              | 22357259                       | (G/T)       |
| 44029       | CadSNP19624    | <i>Desi</i>      | Ca_Desig_denovo              | 22371364                       | (G/A)       |
| 44030       | CadSNP19625    | <i>Desi</i>      | Ca_Desig_denovo              | 22374795                       | (T/A)       |
| 44031       | CadSNP19626    | <i>Desi</i>      | Ca_Desig_denovo              | 22378894                       | (C/T)       |
| 44032       | CadSNP19627    | <i>Desi</i>      | Ca_Desig_denovo              | 22383214                       | (C/T)       |
| 44033       | CadSNP19628    | <i>Desi</i>      | Ca_Desig_denovo              | 22389946                       | (A/G)       |
| 44034       | CadSNP19629    | <i>Desi</i>      | Ca_Desig_denovo              | 22391680                       | (G/T)       |
| 44035       | CadSNP19630    | <i>Desi</i>      | Ca_Desig_denovo              | 22406276                       | (C/G)       |
| 44036       | CadSNP19631    | <i>Desi</i>      | Ca_Desig_denovo              | 22406768                       | (C/T)       |
| 44037       | CadSNP19632    | <i>Desi</i>      | Ca_Desig_denovo              | 22408402                       | (C/A)       |
| 44038       | CadSNP19633    | <i>Desi</i>      | Ca_Desig_denovo              | 22410620                       | (G/A)       |
| 44039       | CadSNP19634    | <i>Desi</i>      | Ca_Desig_denovo              | 22410626                       | (C/G)       |
| 44040       | CadSNP19635    | <i>Desi</i>      | Ca_Desig_denovo              | 22413288                       | (T/C)       |
| 44041       | CadSNP19636    | <i>Desi</i>      | Ca_Desig_denovo              | 22413325                       | (T/C)       |

| <b>S.N.</b> | <b>SNP IDs</b> | <b>Cultivars</b> | <b>Chromosomes/scaffolds</b> | <b>Physical positions (bp)</b> | <b>SNPs</b> |
|-------------|----------------|------------------|------------------------------|--------------------------------|-------------|
| 44042       | CadSNP19637    | <i>Desi</i>      | Ca_Desig_denovo              | 22416728                       | (T/C)       |
| 44043       | CadSNP19638    | <i>Desi</i>      | Ca_Desig_denovo              | 22417476                       | (A/G)       |
| 44044       | CadSNP19639    | <i>Desi</i>      | Ca_Desig_denovo              | 22417533                       | (G/A)       |
| 44045       | CadSNP19640    | <i>Desi</i>      | Ca_Desig_denovo              | 22419244                       | (A/G)       |
| 44046       | CadSNP19641    | <i>Desi</i>      | Ca_Desig_denovo              | 22419270                       | (T/C)       |
| 44047       | CadSNP19642    | <i>Desi</i>      | Ca_Desig_denovo              | 22422399                       | (T/C)       |
| 44048       | CadSNP19643    | <i>Desi</i>      | Ca_Desig_denovo              | 22422479                       | (C/T)       |
| 44049       | CadSNP19644    | <i>Desi</i>      | Ca_Desig_denovo              | 22430218                       | (A/G)       |
| 44050       | CadSNP19645    | <i>Desi</i>      | Ca_Desig_denovo              | 22434026                       | (T/C)       |
| 44051       | CadSNP19646    | <i>Desi</i>      | Ca_Desig_denovo              | 22436457                       | (G/A)       |
| 44052       | CadSNP19647    | <i>Desi</i>      | Ca_Desig_denovo              | 22436487                       | (T/C)       |
| 44053       | CadSNP19648    | <i>Desi</i>      | Ca_Desig_denovo              | 22440912                       | (T/C)       |
| 44054       | CadSNP19649    | <i>Desi</i>      | Ca_Desig_denovo              | 22443534                       | (T/C)       |
| 44055       | CadSNP19650    | <i>Desi</i>      | Ca_Desig_denovo              | 22443570                       | (T/C)       |
| 44056       | CadSNP19651    | <i>Desi</i>      | Ca_Desig_denovo              | 22447915                       | (G/T)       |
| 44057       | CadSNP19652    | <i>Desi</i>      | Ca_Desig_denovo              | 22449683                       | (G/C)       |
| 44058       | CadSNP19653    | <i>Desi</i>      | Ca_Desig_denovo              | 22449725                       | (T/C)       |
| 44059       | CadSNP19654    | <i>Desi</i>      | Ca_Desig_denovo              | 22451630                       | (A/G)       |
| 44060       | CadSNP19655    | <i>Desi</i>      | Ca_Desig_denovo              | 22451657                       | (C/T)       |
| 44061       | CadSNP19656    | <i>Desi</i>      | Ca_Desig_denovo              | 22453361                       | (A/T)       |
| 44062       | CadSNP19657    | <i>Desi</i>      | Ca_Desig_denovo              | 22454044                       | (T/C)       |
| 44063       | CadSNP19658    | <i>Desi</i>      | Ca_Desig_denovo              | 22455156                       | (G/A)       |
| 44064       | CadSNP19659    | <i>Desi</i>      | Ca_Desig_denovo              | 22457140                       | (C/A)       |
| 44065       | CadSNP19660    | <i>Desi</i>      | Ca_Desig_denovo              | 22463611                       | (T/G)       |
| 44066       | CadSNP19661    | <i>Desi</i>      | Ca_Desig_denovo              | 22464442                       | (G/A)       |
| 44067       | CadSNP19662    | <i>Desi</i>      | Ca_Desig_denovo              | 22477125                       | (C/A)       |
| 44068       | CadSNP19663    | <i>Desi</i>      | Ca_Desig_denovo              | 22477145                       | (C/A)       |
| 44069       | CadSNP19664    | <i>Desi</i>      | Ca_Desig_denovo              | 22482051                       | (G/A)       |
| 44070       | CadSNP19665    | <i>Desi</i>      | Ca_Desig_denovo              | 22482075                       | (T/C)       |
| 44071       | CadSNP19666    | <i>Desi</i>      | Ca_Desig_denovo              | 22482399                       | (G/A)       |
| 44072       | CadSNP19667    | <i>Desi</i>      | Ca_Desig_denovo              | 22482403                       | (C/G)       |
| 44073       | CadSNP19668    | <i>Desi</i>      | Ca_Desig_denovo              | 22482452                       | (A/G)       |
| 44074       | CadSNP19669    | <i>Desi</i>      | Ca_Desig_denovo              | 22486105                       | (T/C)       |
| 44075       | CadSNP19670    | <i>Desi</i>      | Ca_Desig_denovo              | 22486167                       | (A/G)       |
| 44076       | CadSNP19671    | <i>Desi</i>      | Ca_Desig_denovo              | 22488741                       | (T/C)       |
| 44077       | CadSNP19672    | <i>Desi</i>      | Ca_Desig_denovo              | 22497053                       | (C/T)       |
| 44078       | CadSNP19673    | <i>Desi</i>      | Ca_Desig_denovo              | 22497558                       | (A/G)       |
| 44079       | CadSNP19674    | <i>Desi</i>      | Ca_Desig_denovo              | 22497815                       | (A/C)       |

| <b>S.N.</b> | <b>SNP IDs</b> | <b>Cultivars</b> | <b>Chromosomes/scaffolds</b> | <b>Physical positions (bp)</b> | <b>SNPs</b> |
|-------------|----------------|------------------|------------------------------|--------------------------------|-------------|
| 44080       | CadSNP19675    | <i>Desi</i>      | Ca_Desig_denovo              | 22505724                       | (A/T)       |
| 44081       | CadSNP19676    | <i>Desi</i>      | Ca_Desig_denovo              | 22510360                       | (A/T)       |
| 44082       | CadSNP19677    | <i>Desi</i>      | Ca_Desig_denovo              | 22510361                       | (C/T)       |
| 44083       | CadSNP19678    | <i>Desi</i>      | Ca_Desig_denovo              | 22516836                       | (C/T)       |
| 44084       | CadSNP19679    | <i>Desi</i>      | Ca_Desig_denovo              | 22521805                       | (T/C)       |
| 44085       | CadSNP19680    | <i>Desi</i>      | Ca_Desig_denovo              | 22523695                       | (C/A)       |
| 44086       | CadSNP19681    | <i>Desi</i>      | Ca_Desig_denovo              | 22523701                       | (G/C)       |
| 44087       | CadSNP19682    | <i>Desi</i>      | Ca_Desig_denovo              | 22526344                       | (G/A)       |
| 44088       | CadSNP19683    | <i>Desi</i>      | Ca_Desig_denovo              | 22526366                       | (A/C)       |
| 44089       | CadSNP19684    | <i>Desi</i>      | Ca_Desig_denovo              | 22529207                       | (T/C)       |
| 44090       | CadSNP19685    | <i>Desi</i>      | Ca_Desig_denovo              | 22530391                       | (A/G)       |
| 44091       | CadSNP19686    | <i>Desi</i>      | Ca_Desig_denovo              | 22530392                       | (T/C)       |
| 44092       | CadSNP19687    | <i>Desi</i>      | Ca_Desig_denovo              | 22539121                       | (C/T)       |
| 44093       | CadSNP19688    | <i>Desi</i>      | Ca_Desig_denovo              | 22539175                       | (G/A)       |
| 44094       | CadSNP19689    | <i>Desi</i>      | Ca_Desig_denovo              | 22557872                       | (T/G)       |
| 44095       | CadSNP19690    | <i>Desi</i>      | Ca_Desig_denovo              | 22564067                       | (C/T)       |
| 44096       | CadSNP19691    | <i>Desi</i>      | Ca_Desig_denovo              | 22564113                       | (T/G)       |
| 44097       | CadSNP19692    | <i>Desi</i>      | Ca_Desig_denovo              | 22568731                       | (C/T)       |
| 44098       | CadSNP19693    | <i>Desi</i>      | Ca_Desig_denovo              | 22568745                       | (T/C)       |
| 44099       | CadSNP19694    | <i>Desi</i>      | Ca_Desig_denovo              | 22572706                       | (G/A)       |
| 44100       | CadSNP19695    | <i>Desi</i>      | Ca_Desig_denovo              | 22576745                       | (G/C)       |
| 44101       | CadSNP19696    | <i>Desi</i>      | Ca_Desig_denovo              | 22576752                       | (G/C)       |
| 44102       | CadSNP19697    | <i>Desi</i>      | Ca_Desig_denovo              | 22579672                       | (A/G)       |
| 44103       | CadSNP19698    | <i>Desi</i>      | Ca_Desig_denovo              | 22579698                       | (T/C)       |
| 44104       | CadSNP19699    | <i>Desi</i>      | Ca_Desig_denovo              | 22580474                       | (G/C)       |
| 44105       | CadSNP19700    | <i>Desi</i>      | Ca_Desig_denovo              | 22583013                       | (G/C)       |
| 44106       | CadSNP19701    | <i>Desi</i>      | Ca_Desig_denovo              | 22583034                       | (G/T)       |
| 44107       | CadSNP19702    | <i>Desi</i>      | Ca_Desig_denovo              | 22583671                       | (T/C)       |
| 44108       | CadSNP19703    | <i>Desi</i>      | Ca_Desig_denovo              | 22587675                       | (C/T)       |
| 44109       | CadSNP19704    | <i>Desi</i>      | Ca_Desig_denovo              | 22589896                       | (C/T)       |
| 44110       | CadSNP19705    | <i>Desi</i>      | Ca_Desig_denovo              | 22589923                       | (G/C)       |
| 44111       | CadSNP19706    | <i>Desi</i>      | Ca_Desig_denovo              | 22590316                       | (A/G)       |
| 44112       | CadSNP19707    | <i>Desi</i>      | Ca_Desig_denovo              | 22590337                       | (G/C)       |
| 44113       | CadSNP19708    | <i>Desi</i>      | Ca_Desig_denovo              | 22600792                       | (G/C)       |
| 44114       | CadSNP19709    | <i>Desi</i>      | Ca_Desig_denovo              | 22600813                       | (C/G)       |
| 44115       | CadSNP19710    | <i>Desi</i>      | Ca_Desig_denovo              | 22608893                       | (A/G)       |
| 44116       | CadSNP19711    | <i>Desi</i>      | Ca_Desig_denovo              | 22620608                       | (A/G)       |
| 44117       | CadSNP19712    | <i>Desi</i>      | Ca_Desig_denovo              | 22620620                       | (C/T)       |

| <b>S.N.</b> | <b>SNP IDs</b> | <b>Cultivars</b> | <b>Chromosomes/scaffolds</b> | <b>Physical positions (bp)</b> | <b>SNPs</b> |
|-------------|----------------|------------------|------------------------------|--------------------------------|-------------|
| 44118       | CadSNP19713    | <i>Desi</i>      | Ca_Desig_denovo              | 22625208                       | (T/G)       |
| 44119       | CadSNP19714    | <i>Desi</i>      | Ca_Desig_denovo              | 22625214                       | (T/A)       |
| 44120       | CadSNP19715    | <i>Desi</i>      | Ca_Desig_denovo              | 22626869                       | (T/C)       |
| 44121       | CadSNP19716    | <i>Desi</i>      | Ca_Desig_denovo              | 22629000                       | (A/G)       |
| 44122       | CadSNP19717    | <i>Desi</i>      | Ca_Desig_denovo              | 22629009                       | (A/G)       |
| 44123       | CadSNP19718    | <i>Desi</i>      | Ca_Desig_denovo              | 22636236                       | (G/C)       |
| 44124       | CadSNP19719    | <i>Desi</i>      | Ca_Desig_denovo              | 22636256                       | (C/T)       |
| 44125       | CadSNP19720    | <i>Desi</i>      | Ca_Desig_denovo              | 22638253                       | (C/T)       |
| 44126       | CadSNP19721    | <i>Desi</i>      | Ca_Desig_denovo              | 22644694                       | (C/A)       |
| 44127       | CadSNP19722    | <i>Desi</i>      | Ca_Desig_denovo              | 22646929                       | (G/A)       |
| 44128       | CadSNP19723    | <i>Desi</i>      | Ca_Desig_denovo              | 22646944                       | (C/G)       |
| 44129       | CadSNP19724    | <i>Desi</i>      | Ca_Desig_denovo              | 22647525                       | (A/G)       |
| 44130       | CadSNP19725    | <i>Desi</i>      | Ca_Desig_denovo              | 22651130                       | (T/G)       |
| 44131       | CadSNP19726    | <i>Desi</i>      | Ca_Desig_denovo              | 22651173                       | (G/C)       |
| 44132       | CadSNP19727    | <i>Desi</i>      | Ca_Desig_denovo              | 22651541                       | (T/C)       |
| 44133       | CadSNP19728    | <i>Desi</i>      | Ca_Desig_denovo              | 22651542                       | (T/C)       |
| 44134       | CadSNP19729    | <i>Desi</i>      | Ca_Desig_denovo              | 22663974                       | (T/C)       |
| 44135       | CadSNP19730    | <i>Desi</i>      | Ca_Desig_denovo              | 22665774                       | (A/C)       |
| 44136       | CadSNP19731    | <i>Desi</i>      | Ca_Desig_denovo              | 22665775                       | (G/C)       |
| 44137       | CadSNP19732    | <i>Desi</i>      | Ca_Desig_denovo              | 22665904                       | (T/C)       |
| 44138       | CadSNP19733    | <i>Desi</i>      | Ca_Desig_denovo              | 22665916                       | (C/A)       |
| 44139       | CadSNP19734    | <i>Desi</i>      | Ca_Desig_denovo              | 22668040                       | (A/G)       |
| 44140       | CadSNP19735    | <i>Desi</i>      | Ca_Desig_denovo              | 22668100                       | (G/A)       |
| 44141       | CadSNP19736    | <i>Desi</i>      | Ca_Desig_denovo              | 22675406                       | (T/C)       |
| 44142       | CadSNP19737    | <i>Desi</i>      | Ca_Desig_denovo              | 22687167                       | (A/T)       |
| 44143       | CadSNP19738    | <i>Desi</i>      | Ca_Desig_denovo              | 22692410                       | (G/C)       |
| 44144       | CadSNP19739    | <i>Desi</i>      | Ca_Desig_denovo              | 22693234                       | (G/C)       |
| 44145       | CadSNP19740    | <i>Desi</i>      | Ca_Desig_denovo              | 22693281                       | (T/C)       |
| 44146       | CadSNP19741    | <i>Desi</i>      | Ca_Desig_denovo              | 22695405                       | (C/T)       |
| 44147       | CadSNP19742    | <i>Desi</i>      | Ca_Desig_denovo              | 22705994                       | (A/G)       |
| 44148       | CadSNP19743    | <i>Desi</i>      | Ca_Desig_denovo              | 22710088                       | (A/G)       |
| 44149       | CadSNP19744    | <i>Desi</i>      | Ca_Desig_denovo              | 22710149                       | (A/G)       |
| 44150       | CadSNP19745    | <i>Desi</i>      | Ca_Desig_denovo              | 22710520                       | (C/G)       |
| 44151       | CadSNP19746    | <i>Desi</i>      | Ca_Desig_denovo              | 22710524                       | (T/C)       |
| 44152       | CadSNP19747    | <i>Desi</i>      | Ca_Desig_denovo              | 22710802                       | (C/T)       |
| 44153       | CadSNP19748    | <i>Desi</i>      | Ca_Desig_denovo              | 22710805                       | (G/C)       |
| 44154       | CadSNP19749    | <i>Desi</i>      | Ca_Desig_denovo              | 22720445                       | (A/G)       |
| 44155       | CadSNP19750    | <i>Desi</i>      | Ca_Desig_denovo              | 22727731                       | (T/G)       |

| <b>S.N.</b> | <b>SNP IDs</b> | <b>Cultivars</b> | <b>Chromosomes/scaffolds</b> | <b>Physical positions (bp)</b> | <b>SNPs</b> |
|-------------|----------------|------------------|------------------------------|--------------------------------|-------------|
| 44156       | CadSNP19751    | <i>Desi</i>      | Ca_Desig_denovo              | 22727800                       | (T/C)       |
| 44157       | CadSNP19752    | <i>Desi</i>      | Ca_Desig_denovo              | 22731502                       | (A/C)       |
| 44158       | CadSNP19753    | <i>Desi</i>      | Ca_Desig_denovo              | 22733909                       | (A/G)       |
| 44159       | CadSNP19754    | <i>Desi</i>      | Ca_Desig_denovo              | 22733942                       | (A/C)       |
| 44160       | CadSNP19755    | <i>Desi</i>      | Ca_Desig_denovo              | 22733943                       | (G/C)       |
| 44161       | CadSNP19756    | <i>Desi</i>      | Ca_Desig_denovo              | 22736873                       | (A/G)       |
| 44162       | CadSNP19757    | <i>Desi</i>      | Ca_Desig_denovo              | 22743091                       | (T/C)       |
| 44163       | CadSNP19758    | <i>Desi</i>      | Ca_Desig_denovo              | 22761719                       | (A/G)       |
| 44164       | CadSNP19759    | <i>Desi</i>      | Ca_Desig_denovo              | 22763714                       | (A/C)       |
| 44165       | CadSNP19760    | <i>Desi</i>      | Ca_Desig_denovo              | 22763771                       | (G/A)       |
| 44166       | CadSNP19761    | <i>Desi</i>      | Ca_Desig_denovo              | 22768459                       | (G/A)       |
| 44167       | CadSNP19762    | <i>Desi</i>      | Ca_Desig_denovo              | 22768468                       | (C/A)       |
| 44168       | CadSNP19763    | <i>Desi</i>      | Ca_Desig_denovo              | 22769552                       | (C/G)       |
| 44169       | CadSNP19764    | <i>Desi</i>      | Ca_Desig_denovo              | 22769554                       | (A/G)       |
| 44170       | CadSNP19765    | <i>Desi</i>      | Ca_Desig_denovo              | 22773639                       | (C/A)       |
| 44171       | CadSNP19766    | <i>Desi</i>      | Ca_Desig_denovo              | 22778046                       | (C/T)       |
| 44172       | CadSNP19767    | <i>Desi</i>      | Ca_Desig_denovo              | 22778100                       | (T/C)       |
| 44173       | CadSNP19768    | <i>Desi</i>      | Ca_Desig_denovo              | 22778431                       | (A/G)       |
| 44174       | CadSNP19769    | <i>Desi</i>      | Ca_Desig_denovo              | 22778434                       | (A/G)       |
| 44175       | CadSNP19770    | <i>Desi</i>      | Ca_Desig_denovo              | 22787155                       | (A/G)       |
| 44176       | CadSNP19771    | <i>Desi</i>      | Ca_Desig_denovo              | 22788011                       | (C/G)       |
| 44177       | CadSNP19772    | <i>Desi</i>      | Ca_Desig_denovo              | 22789964                       | (G/C)       |
| 44178       | CadSNP19773    | <i>Desi</i>      | Ca_Desig_denovo              | 22797238                       | (T/C)       |
| 44179       | CadSNP19774    | <i>Desi</i>      | Ca_Desig_denovo              | 22802867                       | (C/A)       |
| 44180       | CadSNP19775    | <i>Desi</i>      | Ca_Desig_denovo              | 22807280                       | (A/C)       |
| 44181       | CadSNP19776    | <i>Desi</i>      | Ca_Desig_denovo              | 22814040                       | (T/C)       |
| 44182       | CadSNP19777    | <i>Desi</i>      | Ca_Desig_denovo              | 22814081                       | (C/G)       |
| 44183       | CadSNP19778    | <i>Desi</i>      | Ca_Desig_denovo              | 22820921                       | (G/A)       |
| 44184       | CadSNP19779    | <i>Desi</i>      | Ca_Desig_denovo              | 22824838                       | (C/T)       |
| 44185       | CadSNP19780    | <i>Desi</i>      | Ca_Desig_denovo              | 22828140                       | (C/G)       |
| 44186       | CadSNP19781    | <i>Desi</i>      | Ca_Desig_denovo              | 22828996                       | (A/G)       |
| 44187       | CadSNP19782    | <i>Desi</i>      | Ca_Desig_denovo              | 22831129                       | (A/G)       |
| 44188       | CadSNP19783    | <i>Desi</i>      | Ca_Desig_denovo              | 22831550                       | (T/C)       |
| 44189       | CadSNP19784    | <i>Desi</i>      | Ca_Desig_denovo              | 22831586                       | (A/G)       |
| 44190       | CadSNP19785    | <i>Desi</i>      | Ca_Desig_denovo              | 22834265                       | (A/G)       |
| 44191       | CadSNP19786    | <i>Desi</i>      | Ca_Desig_denovo              | 22834903                       | (C/G)       |
| 44192       | CadSNP19787    | <i>Desi</i>      | Ca_Desig_denovo              | 22834908                       | (A/C)       |
| 44193       | CadSNP19788    | <i>Desi</i>      | Ca_Desig_denovo              | 22835807                       | (G/T)       |

| <b>S.N.</b> | <b>SNP IDs</b> | <b>Cultivars</b> | <b>Chromosomes/scaffolds</b> | <b>Physical positions (bp)</b> | <b>SNPs</b> |
|-------------|----------------|------------------|------------------------------|--------------------------------|-------------|
| 44194       | CadSNP19789    | <i>Desi</i>      | Ca_Desig_denovo              | 22838690                       | (C/T)       |
| 44195       | CadSNP19790    | <i>Desi</i>      | Ca_Desig_denovo              | 22838754                       | (A/C)       |
| 44196       | CadSNP19791    | <i>Desi</i>      | Ca_Desig_denovo              | 22838755                       | (A/G)       |
| 44197       | CadSNP19792    | <i>Desi</i>      | Ca_Desig_denovo              | 22859716                       | (G/T)       |
| 44198       | CadSNP19793    | <i>Desi</i>      | Ca_Desig_denovo              | 22859719                       | (T/G)       |
| 44199       | CadSNP19794    | <i>Desi</i>      | Ca_Desig_denovo              | 22859883                       | (A/G)       |
| 44200       | CadSNP19795    | <i>Desi</i>      | Ca_Desig_denovo              | 22859884                       | (G/A)       |
| 44201       | CadSNP19796    | <i>Desi</i>      | Ca_Desig_denovo              | 22859886                       | (C/G)       |
| 44202       | CadSNP19797    | <i>Desi</i>      | Ca_Desig_denovo              | 22859898                       | (T/G)       |
| 44203       | CadSNP19798    | <i>Desi</i>      | Ca_Desig_denovo              | 22859899                       | (T/A)       |
| 44204       | CadSNP19799    | <i>Desi</i>      | Ca_Desig_denovo              | 22859901                       | (A/G)       |
| 44205       | CadSNP19800    | <i>Desi</i>      | Ca_Desig_denovo              | 22859902                       | (G/A)       |
| 44206       | CadSNP19801    | <i>Desi</i>      | Ca_Desig_denovo              | 22859904                       | (A/G)       |
| 44207       | CadSNP19802    | <i>Desi</i>      | Ca_Desig_denovo              | 22876155                       | (T/C)       |
| 44208       | CadSNP19803    | <i>Desi</i>      | Ca_Desig_denovo              | 22876209                       | (A/G)       |
| 44209       | CadSNP19804    | <i>Desi</i>      | Ca_Desig_denovo              | 22899172                       | (C/T)       |
| 44210       | CadSNP19805    | <i>Desi</i>      | Ca_Desig_denovo              | 22899190                       | (G/T)       |
| 44211       | CadSNP19806    | <i>Desi</i>      | Ca_Desig_denovo              | 22919021                       | (C/A)       |
| 44212       | CadSNP19807    | <i>Desi</i>      | Ca_Desig_denovo              | 22919032                       | (T/C)       |
| 44213       | CadSNP19808    | <i>Desi</i>      | Ca_Desig_denovo              | 22921739                       | (C/G)       |
| 44214       | CadSNP19809    | <i>Desi</i>      | Ca_Desig_denovo              | 22921754                       | (G/A)       |
| 44215       | CadSNP19810    | <i>Desi</i>      | Ca_Desig_denovo              | 22926107                       | (C/T)       |
| 44216       | CadSNP19811    | <i>Desi</i>      | Ca_Desig_denovo              | 22926126                       | (C/T)       |
| 44217       | CadSNP19812    | <i>Desi</i>      | Ca_Desig_denovo              | 22935631                       | (A/G)       |
| 44218       | CadSNP19813    | <i>Desi</i>      | Ca_Desig_denovo              | 22935648                       | (C/T)       |
| 44219       | CadSNP19814    | <i>Desi</i>      | Ca_Desig_denovo              | 22947596                       | (A/G)       |
| 44220       | CadSNP19815    | <i>Desi</i>      | Ca_Desig_denovo              | 22947614                       | (T/G)       |
| 44221       | CadSNP19816    | <i>Desi</i>      | Ca_Desig_denovo              | 22971223                       | (C/T)       |
| 44222       | CadSNP19817    | <i>Desi</i>      | Ca_Desig_denovo              | 22971235                       | (A/G)       |
| 44223       | CadSNP19818    | <i>Desi</i>      | Ca_Desig_denovo              | 23046661                       | (C/T)       |
| 44224       | CadSNP19819    | <i>Desi</i>      | Ca_Desig_denovo              | 23052686                       | (G/A)       |
| 44225       | CadSNP19820    | <i>Desi</i>      | Ca_Desig_denovo              | 23072864                       | (A/G)       |
| 44226       | CadSNP19821    | <i>Desi</i>      | Ca_Desig_denovo              | 23081707                       | (G/A)       |
| 44227       | CadSNP19822    | <i>Desi</i>      | Ca_Desig_denovo              | 23081715                       | (G/C)       |
| 44228       | CadSNP19823    | <i>Desi</i>      | Ca_Desig_denovo              | 23116339                       | (G/A)       |
| 44229       | CadSNP19824    | <i>Desi</i>      | Ca_Desig_denovo              | 23162329                       | (G/C)       |
| 44230       | CadSNP19825    | <i>Desi</i>      | Ca_Desig_denovo              | 23162350                       | (T/C)       |
| 44231       | CadSNP19826    | <i>Desi</i>      | Ca_Desig_denovo              | 23227232                       | (G/C)       |

| <b>S.N.</b> | <b>SNP IDs</b> | <b>Cultivars</b> | <b>Chromosomes/scaffolds</b> | <b>Physical positions (bp)</b> | <b>SNPs</b> |
|-------------|----------------|------------------|------------------------------|--------------------------------|-------------|
| 44232       | CadSNP19827    | <i>Desi</i>      | Ca_Desig_denovo              | 23227265                       | (C/T)       |
| 44233       | CadSNP19828    | <i>Desi</i>      | Ca_Desig_denovo              | 23240643                       | (C/A)       |
| 44234       | CadSNP19829    | <i>Desi</i>      | Ca_Desig_denovo              | 23263123                       | (T/C)       |
| 44235       | CadSNP19830    | <i>Desi</i>      | Ca_Desig_denovo              | 23263138                       | (T/C)       |
| 44236       | CadSNP19831    | <i>Desi</i>      | Ca_Desig_denovo              | 23310969                       | (C/T)       |
| 44237       | CadSNP19832    | <i>Desi</i>      | Ca_Desig_denovo              | 23310970                       | (A/G)       |
| 44238       | CadSNP19833    | <i>Desi</i>      | Ca_Desig_denovo              | 23342023                       | (G/C)       |
| 44239       | CadSNP19834    | <i>Desi</i>      | Ca_Desig_denovo              | 23344169                       | (G/A)       |
| 44240       | CadSNP19835    | <i>Desi</i>      | Ca_Desig_denovo              | 23344187                       | (G/A)       |
| 44241       | CadSNP19836    | <i>Desi</i>      | Ca_Desig_denovo              | 23373063                       | (C/G)       |
| 44242       | CadSNP19837    | <i>Desi</i>      | Ca_Desig_denovo              | 23407592                       | (T/C)       |
| 44243       | CadSNP19838    | <i>Desi</i>      | Ca_Desig_denovo              | 23407595                       | (T/C)       |
| 44244       | CadSNP19839    | <i>Desi</i>      | Ca_Desig_denovo              | 23413895                       | (C/T)       |
| 44245       | CadSNP19840    | <i>Desi</i>      | Ca_Desig_denovo              | 23413939                       | (C/T)       |
| 44246       | CadSNP19841    | <i>Desi</i>      | Ca_Desig_denovo              | 23430884                       | (A/C)       |
| 44247       | CadSNP19842    | <i>Desi</i>      | Ca_Desig_denovo              | 23430886                       | (A/G)       |
| 44248       | CadSNP19843    | <i>Desi</i>      | Ca_Desig_denovo              | 23447199                       | (C/T)       |
| 44249       | CadSNP19844    | <i>Desi</i>      | Ca_Desig_denovo              | 23452949                       | (C/G)       |
| 44250       | CadSNP19845    | <i>Desi</i>      | Ca_Desig_denovo              | 23465236                       | (C/A)       |
| 44251       | CadSNP19846    | <i>Desi</i>      | Ca_Desig_denovo              | 23465282                       | (G/C)       |
| 44252       | CadSNP19847    | <i>Desi</i>      | Ca_Desig_denovo              | 23503027                       | (A/G)       |
| 44253       | CadSNP19848    | <i>Desi</i>      | Ca_Desig_denovo              | 23533585                       | (A/G)       |
| 44254       | CadSNP19849    | <i>Desi</i>      | Ca_Desig_denovo              | 23533645                       | (A/G)       |
| 44255       | CadSNP19850    | <i>Desi</i>      | Ca_Desig_denovo              | 23545684                       | (C/G)       |
| 44256       | CadSNP19851    | <i>Desi</i>      | Ca_Desig_denovo              | 23545727                       | (A/C)       |
| 44257       | CadSNP19852    | <i>Desi</i>      | Ca_Desig_denovo              | 23577118                       | (C/G)       |
| 44258       | CadSNP19853    | <i>Desi</i>      | Ca_Desig_denovo              | 23577121                       | (C/T)       |
| 44259       | CadSNP19854    | <i>Desi</i>      | Ca_Desig_denovo              | 23587425                       | (A/G)       |
| 44260       | CadSNP19855    | <i>Desi</i>      | Ca_Desig_denovo              | 23602031                       | (C/T)       |
| 44261       | CadSNP19856    | <i>Desi</i>      | Ca_Desig_denovo              | 23654085                       | (A/C)       |
| 44262       | CadSNP19857    | <i>Desi</i>      | Ca_Desig_denovo              | 23693366                       | (A/G)       |
| 44263       | CadSNP19858    | <i>Desi</i>      | Ca_Desig_denovo              | 23693372                       | (C/G)       |
| 44264       | CadSNP19859    | <i>Desi</i>      | Ca_Desig_denovo              | 23718931                       | (C/T)       |
| 44265       | CadSNP19860    | <i>Desi</i>      | Ca_Desig_denovo              | 23718997                       | (G/A)       |
| 44266       | CadSNP19861    | <i>Desi</i>      | Ca_Desig_denovo              | 23863622                       | (C/G)       |
| 44267       | CadSNP19862    | <i>Desi</i>      | Ca_Desig_denovo              | 23863653                       | (C/T)       |
| 44268       | CadSNP19863    | <i>Desi</i>      | Ca_Desig_denovo              | 23866421                       | (G/C)       |
| 44269       | CadSNP19864    | <i>Desi</i>      | Ca_Desig_denovo              | 23866439                       | (C/A)       |

| <b>S.N.</b> | <b>SNP IDs</b> | <b>Cultivars</b> | <b>Chromosomes/scaffolds</b> | <b>Physical positions (bp)</b> | <b>SNPs</b> |
|-------------|----------------|------------------|------------------------------|--------------------------------|-------------|
| 44270       | CadSNP19865    | <i>Desi</i>      | Ca_Desig_denovo              | 23905431                       | (C/T)       |
| 44271       | CadSNP19866    | <i>Desi</i>      | Ca_Desig_denovo              | 23905441                       | (G/T)       |
| 44272       | CadSNP19867    | <i>Desi</i>      | Ca_Desig_denovo              | 23945836                       | (C/T)       |
| 44273       | CadSNP19868    | <i>Desi</i>      | Ca_Desig_denovo              | 23948296                       | (A/G)       |
| 44274       | CadSNP19869    | <i>Desi</i>      | Ca_Desig_denovo              | 23963909                       | (G/C)       |
| 44275       | CadSNP19870    | <i>Desi</i>      | Ca_Desig_denovo              | 23995603                       | (A/G)       |
| 44276       | CadSNP19871    | <i>Desi</i>      | Ca_Desig_denovo              | 23995619                       | (A/T)       |
| 44277       | CadSNP19872    | <i>Desi</i>      | Ca_Desig_denovo              | 24002753                       | (G/T)       |
| 44278       | CadSNP19873    | <i>Desi</i>      | Ca_Desig_denovo              | 24002801                       | (A/G)       |
| 44279       | CadSNP19874    | <i>Desi</i>      | Ca_Desig_denovo              | 24057798                       | (A/C)       |
| 44280       | CadSNP19875    | <i>Desi</i>      | Ca_Desig_denovo              | 24100136                       | (A/C)       |
| 44281       | CadSNP19876    | <i>Desi</i>      | Ca_Desig_denovo              | 24163468                       | (T/G)       |
| 44282       | CadSNP19877    | <i>Desi</i>      | Ca_Desig_denovo              | 24170531                       | (C/T)       |
| 44283       | CadSNP19878    | <i>Desi</i>      | Ca_Desig_denovo              | 24170601                       | (G/T)       |
| 44284       | CadSNP19879    | <i>Desi</i>      | Ca_Desig_denovo              | 24181404                       | (C/G)       |
| 44285       | CadSNP19880    | <i>Desi</i>      | Ca_Desig_denovo              | 24181446                       | (A/C)       |
| 44286       | CadSNP19881    | <i>Desi</i>      | Ca_Desig_denovo              | 24207542                       | (T/G)       |
| 44287       | CadSNP19882    | <i>Desi</i>      | Ca_Desig_denovo              | 24247621                       | (A/G)       |
| 44288       | CadSNP19883    | <i>Desi</i>      | Ca_Desig_denovo              | 24247670                       | (T/G)       |
| 44289       | CadSNP19884    | <i>Desi</i>      | Ca_Desig_denovo              | 24266248                       | (T/C)       |
| 44290       | CadSNP19885    | <i>Desi</i>      | Ca_Desig_denovo              | 24266276                       | (G/A)       |
| 44291       | CadSNP19886    | <i>Desi</i>      | Ca_Desig_denovo              | 24277219                       | (G/T)       |
| 44292       | CadSNP19887    | <i>Desi</i>      | Ca_Desig_denovo              | 24277231                       | (C/G)       |
| 44293       | CadSNP19888    | <i>Desi</i>      | Ca_Desig_denovo              | 24283472                       | (C/G)       |
| 44294       | CadSNP19889    | <i>Desi</i>      | Ca_Desig_denovo              | 24287094                       | (T/C)       |
| 44295       | CadSNP19890    | <i>Desi</i>      | Ca_Desig_denovo              | 24287154                       | (C/G)       |
| 44296       | CadSNP19891    | <i>Desi</i>      | Ca_Desig_denovo              | 24291515                       | (C/T)       |
| 44297       | CadSNP19892    | <i>Desi</i>      | Ca_Desig_denovo              | 24291524                       | (A/G)       |
| 44298       | CadSNP19893    | <i>Desi</i>      | Ca_Desig_denovo              | 24326761                       | (G/A)       |
| 44299       | CadSNP19894    | <i>Desi</i>      | Ca_Desig_denovo              | 24326800                       | (G/A)       |
| 44300       | CadSNP19895    | <i>Desi</i>      | Ca_Desig_denovo              | 24334139                       | (G/A)       |
| 44301       | CadSNP19896    | <i>Desi</i>      | Ca_Desig_denovo              | 24442955                       | (T/C)       |
| 44302       | CadSNP19897    | <i>Desi</i>      | Ca_Desig_denovo              | 24476248                       | (C/T)       |
| 44303       | CadSNP19898    | <i>Desi</i>      | Ca_Desig_denovo              | 24534094                       | (G/C)       |
| 44304       | CadSNP19899    | <i>Desi</i>      | Ca_Desig_denovo              | 24534113                       | (C/T)       |
| 44305       | CadSNP19900    | <i>Desi</i>      | Ca_Desig_denovo              | 24539082                       | (C/A)       |
| 44306       | CadSNP19901    | <i>Desi</i>      | Ca_Desig_denovo              | 24604948                       | (C/T)       |
| 44307       | CadSNP19902    | <i>Desi</i>      | Ca_Desig_denovo              | 24731128                       | (A/G)       |



| <b>S.N.</b> | <b>SNP IDs</b> | <b>Cultivars</b> | <b>Chromosomes/scaffolds</b> | <b>Physical positions (bp)</b> | <b>SNPs</b> |
|-------------|----------------|------------------|------------------------------|--------------------------------|-------------|
| 44308       | CadSNP19903    | <i>Desi</i>      | Ca_Desig_denovo              | 24731140                       | (C/A)       |
| 44309       | CadSNP19904    | <i>Desi</i>      | Ca_Desig_denovo              | 24731158                       | (G/A)       |
| 44310       | CadSNP19905    | <i>Desi</i>      | Ca_Desig_denovo              | 24753020                       | (G/A)       |
| 44311       | CadSNP19906    | <i>Desi</i>      | Ca_Desig_denovo              | 24806046                       | (C/G)       |
| 44312       | CadSNP19907    | <i>Desi</i>      | Ca_Desig_denovo              | 24815788                       | (C/G)       |
| 44313       | CadSNP19908    | <i>Desi</i>      | Ca_Desig_denovo              | 24822181                       | (G/A)       |
| 44314       | CadSNP19909    | <i>Desi</i>      | Ca_Desig_denovo              | 24822187                       | (T/C)       |
| 44315       | CadSNP19910    | <i>Desi</i>      | Ca_Desig_denovo              | 24831116                       | (C/T)       |
| 44316       | CadSNP19911    | <i>Desi</i>      | Ca_Desig_denovo              | 24837758                       | (A/G)       |
| 44317       | CadSNP19912    | <i>Desi</i>      | Ca_Desig_denovo              | 24853793                       | (G/A)       |
| 44318       | CadSNP19913    | <i>Desi</i>      | Ca_Desig_denovo              | 24854190                       | (G/A)       |
| 44319       | CadSNP19914    | <i>Desi</i>      | Ca_Desig_denovo              | 24854214                       | (C/T)       |
| 44320       | CadSNP19915    | <i>Desi</i>      | Ca_Desig_denovo              | 24860301                       | (A/G)       |
| 44321       | CadSNP19916    | <i>Desi</i>      | Ca_Desig_denovo              | 24861054                       | (T/C)       |
| 44322       | CadSNP19917    | <i>Desi</i>      | Ca_Desig_denovo              | 24861109                       | (T/G)       |
| 44323       | CadSNP19918    | <i>Desi</i>      | Ca_Desig_denovo              | 24862642                       | (T/C)       |
| 44324       | CadSNP19919    | <i>Desi</i>      | Ca_Desig_denovo              | 24862685                       | (A/C)       |
| 44325       | CadSNP19920    | <i>Desi</i>      | Ca_Desig_denovo              | 24867306                       | (G/A)       |
| 44326       | CadSNP19921    | <i>Desi</i>      | Ca_Desig_denovo              | 24881375                       | (G/A)       |
| 44327       | CadSNP19922    | <i>Desi</i>      | Ca_Desig_denovo              | 24881381                       | (C/T)       |
| 44328       | CadSNP19923    | <i>Desi</i>      | Ca_Desig_denovo              | 24881627                       | (C/T)       |
| 44329       | CadSNP19924    | <i>Desi</i>      | Ca_Desig_denovo              | 24912986                       | (C/G)       |
| 44330       | CadSNP19925    | <i>Desi</i>      | Ca_Desig_denovo              | 25033757                       | (A/G)       |
| 44331       | CadSNP19926    | <i>Desi</i>      | Ca_Desig_denovo              | 25033787                       | (G/T)       |
| 44332       | CadSNP19927    | <i>Desi</i>      | Ca_Desig_denovo              | 25042059                       | (A/G)       |
| 44333       | CadSNP19928    | <i>Desi</i>      | Ca_Desig_denovo              | 25042098                       | (G/A)       |
| 44334       | CadSNP19929    | <i>Desi</i>      | Ca_Desig_denovo              | 25052285                       | (C/T)       |
| 44335       | CadSNP19930    | <i>Desi</i>      | Ca_Desig_denovo              | 25052294                       | (G/A)       |
| 44336       | CadSNP19931    | <i>Desi</i>      | Ca_Desig_denovo              | 25052306                       | (G/A)       |
| 44337       | CadSNP19932    | <i>Desi</i>      | Ca_Desig_denovo              | 25061107                       | (T/C)       |
| 44338       | CadSNP19933    | <i>Desi</i>      | Ca_Desig_denovo              | 25061123                       | (A/C)       |
| 44339       | CadSNP19934    | <i>Desi</i>      | Ca_Desig_denovo              | 25073189                       | (C/A)       |
| 44340       | CadSNP19935    | <i>Desi</i>      | Ca_Desig_denovo              | 25073237                       | (C/A)       |
| 44341       | CadSNP19936    | <i>Desi</i>      | Ca_Desig_denovo              | 25104814                       | (G/A)       |
| 44342       | CadSNP19937    | <i>Desi</i>      | Ca_Desig_denovo              | 25104880                       | (G/A)       |
| 44343       | CadSNP19938    | <i>Desi</i>      | Ca_Desig_denovo              | 25112731                       | (C/T)       |
| 44344       | CadSNP19939    | <i>Desi</i>      | Ca_Desig_denovo              | 25112767                       | (T/A)       |
| 44345       | CadSNP19940    | <i>Desi</i>      | Ca_Desig_denovo              | 25145277                       | (T/C)       |

| <b>S.N.</b> | <b>SNP IDs</b> | <b>Cultivars</b> | <b>Chromosomes/scaffolds</b> | <b>Physical positions (bp)</b> | <b>SNPs</b> |
|-------------|----------------|------------------|------------------------------|--------------------------------|-------------|
| 44346       | CadSNP19941    | <i>Desi</i>      | Ca_Desig_denovo              | 25187079                       | (T/G)       |
| 44347       | CadSNP19942    | <i>Desi</i>      | Ca_Desig_denovo              | 25216988                       | (A/G)       |
| 44348       | CadSNP19943    | <i>Desi</i>      | Ca_Desig_denovo              | 25391621                       | (C/G)       |
| 44349       | CadSNP19944    | <i>Desi</i>      | Ca_Desig_denovo              | 25444182                       | (C/T)       |
| 44350       | CadSNP19945    | <i>Desi</i>      | Ca_Desig_denovo              | 25475435                       | (A/C)       |
| 44351       | CadSNP19946    | <i>Desi</i>      | Ca_Desig_denovo              | 25475455                       | (C/A)       |
| 44352       | CadSNP19947    | <i>Desi</i>      | Ca_Desig_denovo              | 25521380                       | (T/C)       |
| 44353       | CadSNP19948    | <i>Desi</i>      | Ca_Desig_denovo              | 25521387                       | (G/A)       |
| 44354       | CadSNP19949    | <i>Desi</i>      | Ca_Desig_denovo              | 25551716                       | (A/G)       |
| 44355       | CadSNP19950    | <i>Desi</i>      | Ca_Desig_denovo              | 25592340                       | (C/T)       |
| 44356       | CadSNP19951    | <i>Desi</i>      | Ca_Desig_denovo              | 25666814                       | (G/A)       |
| 44357       | CadSNP19952    | <i>Desi</i>      | Ca_Desig_denovo              | 25667486                       | (T/C)       |
| 44358       | CadSNP19953    | <i>Desi</i>      | Ca_Desig_denovo              | 25667522                       | (C/T)       |
| 44359       | CadSNP19954    | <i>Desi</i>      | Ca_Desig_denovo              | 25685974                       | (C/G)       |
| 44360       | CadSNP19955    | <i>Desi</i>      | Ca_Desig_denovo              | 25685996                       | (A/G)       |
| 44361       | CadSNP19956    | <i>Desi</i>      | Ca_Desig_denovo              | 25710067                       | (G/A)       |
| 44362       | CadSNP19957    | <i>Desi</i>      | Ca_Desig_denovo              | 25733345                       | (T/C)       |
| 44363       | CadSNP19958    | <i>Desi</i>      | Ca_Desig_denovo              | 25733350                       | (C/G)       |
| 44364       | CadSNP19959    | <i>Desi</i>      | Ca_Desig_denovo              | 25756029                       | (C/T)       |
| 44365       | CadSNP19960    | <i>Desi</i>      | Ca_Desig_denovo              | 25756044                       | (C/T)       |
| 44366       | CadSNP19961    | <i>Desi</i>      | Ca_Desig_denovo              | 25773098                       | (T/C)       |
| 44367       | CadSNP19962    | <i>Desi</i>      | Ca_Desig_denovo              | 25773113                       | (C/G)       |
| 44368       | CadSNP19963    | <i>Desi</i>      | Ca_Desig_denovo              | 25842503                       | (A/G)       |
| 44369       | CadSNP19964    | <i>Desi</i>      | Ca_Desig_denovo              | 25850129                       | (G/C)       |
| 44370       | CadSNP19965    | <i>Desi</i>      | Ca_Desig_denovo              | 25850135                       | (T/C)       |
| 44371       | CadSNP19966    | <i>Desi</i>      | Ca_Desig_denovo              | 25859411                       | (G/T)       |
| 44372       | CadSNP19967    | <i>Desi</i>      | Ca_Desig_denovo              | 25859414                       | (T/C)       |
| 44373       | CadSNP19968    | <i>Desi</i>      | Ca_Desig_denovo              | 25927400                       | (G/C)       |
| 44374       | CadSNP19969    | <i>Desi</i>      | Ca_Desig_denovo              | 25927445                       | (C/G)       |
| 44375       | CadSNP19970    | <i>Desi</i>      | Ca_Desig_denovo              | 25972266                       | (C/T)       |
| 44376       | CadSNP19971    | <i>Desi</i>      | Ca_Desig_denovo              | 25972273                       | (G/A)       |
| 44377       | CadSNP19972    | <i>Desi</i>      | Ca_Desig_denovo              | 25998363                       | (C/T)       |
| 44378       | CadSNP19973    | <i>Desi</i>      | Ca_Desig_denovo              | 25998371                       | (G/A)       |
| 44379       | CadSNP19974    | <i>Desi</i>      | Ca_Desig_denovo              | 26009730                       | (A/G)       |
| 44380       | CadSNP19975    | <i>Desi</i>      | Ca_Desig_denovo              | 26039688                       | (A/G)       |
| 44381       | CadSNP19976    | <i>Desi</i>      | Ca_Desig_denovo              | 26039691                       | (G/C)       |
| 44382       | CadSNP19977    | <i>Desi</i>      | Ca_Desig_denovo              | 26100853                       | (C/T)       |
| 44383       | CadSNP19978    | <i>Desi</i>      | Ca_Desig_denovo              | 26135100                       | (T/G)       |

| <b>S.N.</b> | <b>SNP IDs</b> | <b>Cultivars</b> | <b>Chromosomes/scaffolds</b> | <b>Physical positions (bp)</b> | <b>SNPs</b> |
|-------------|----------------|------------------|------------------------------|--------------------------------|-------------|
| 44384       | CadSNP19979    | <i>Desi</i>      | Ca_Desig_denovo              | 26196545                       | (A/G)       |
| 44385       | CadSNP19980    | <i>Desi</i>      | Ca_Desig_denovo              | 26252372                       | (A/G)       |
| 44386       | CadSNP19981    | <i>Desi</i>      | Ca_Desig_denovo              | 26252382                       | (C/T)       |
| 44387       | CadSNP19982    | <i>Desi</i>      | Ca_Desig_denovo              | 26280725                       | (G/A)       |
| 44388       | CadSNP19983    | <i>Desi</i>      | Ca_Desig_denovo              | 26343187                       | (G/C)       |
| 44389       | CadSNP19984    | <i>Desi</i>      | Ca_Desig_denovo              | 26343215                       | (A/G)       |
| 44390       | CadSNP19985    | <i>Desi</i>      | Ca_Desig_denovo              | 26371915                       | (T/C)       |
| 44391       | CadSNP19986    | <i>Desi</i>      | Ca_Desig_denovo              | 26401144                       | (C/T)       |
| 44392       | CadSNP19987    | <i>Desi</i>      | Ca_Desig_denovo              | 26479736                       | (C/T)       |
| 44393       | CadSNP19988    | <i>Desi</i>      | Ca_Desig_denovo              | 26479751                       | (A/G)       |
| 44394       | CadSNP19989    | <i>Desi</i>      | Ca_Desig_denovo              | 26480975                       | (A/G)       |
| 44395       | CadSNP19990    | <i>Desi</i>      | Ca_Desig_denovo              | 26495818                       | (C/T)       |
| 44396       | CadSNP19991    | <i>Desi</i>      | Ca_Desig_denovo              | 26495856                       | (G/A)       |
| 44397       | CadSNP19992    | <i>Desi</i>      | Ca_Desig_denovo              | 26543603                       | (T/G)       |
| 44398       | CadSNP19993    | <i>Desi</i>      | Ca_Desig_denovo              | 26543609                       | (C/T)       |
| 44399       | CadSNP19994    | <i>Desi</i>      | Ca_Desig_denovo              | 26554031                       | (G/A)       |
| 44400       | CadSNP19995    | <i>Desi</i>      | Ca_Desig_denovo              | 26563739                       | (T/C)       |
| 44401       | CadSNP19996    | <i>Desi</i>      | Ca_Desig_denovo              | 26571889                       | (A/G)       |
| 44402       | CadSNP19997    | <i>Desi</i>      | Ca_Desig_denovo              | 26571919                       | (T/G)       |
| 44403       | CadSNP19998    | <i>Desi</i>      | Ca_Desig_denovo              | 26633069                       | (G/A)       |
| 44404       | CadSNP19999    | <i>Desi</i>      | Ca_Desig_denovo              | 26633077                       | (C/T)       |
| 44405       | CadSNP20000    | <i>Desi</i>      | Ca_Desig_denovo              | 26639322                       | (G/A)       |
| 44406       | CadSNP20001    | <i>Desi</i>      | Ca_Desig_denovo              | 26639358                       | (T/C)       |
| 44407       | CadSNP20002    | <i>Desi</i>      | Ca_Desig_denovo              | 26642662                       | (A/C)       |
| 44408       | CadSNP20003    | <i>Desi</i>      | Ca_Desig_denovo              | 26642683                       | (C/T)       |
| 44409       | CadSNP20004    | <i>Desi</i>      | Ca_Desig_denovo              | 26680559                       | (G/C)       |
| 44410       | CadSNP20005    | <i>Desi</i>      | Ca_Desig_denovo              | 26697806                       | (T/G)       |
| 44411       | CadSNP20006    | <i>Desi</i>      | Ca_Desig_denovo              | 26697815                       | (G/A)       |
| 44412       | CadSNP20007    | <i>Desi</i>      | Ca_Desig_denovo              | 26704581                       | (A/T)       |
| 44413       | CadSNP20008    | <i>Desi</i>      | Ca_Desig_denovo              | 26704595                       | (C/T)       |
| 44414       | CadSNP20009    | <i>Desi</i>      | Ca_Desig_denovo              | 26723286                       | (G/A)       |
| 44415       | CadSNP20010    | <i>Desi</i>      | Ca_Desig_denovo              | 26730350                       | (T/C)       |
| 44416       | CadSNP20011    | <i>Desi</i>      | Ca_Desig_denovo              | 26730371                       | (G/A)       |
| 44417       | CadSNP20012    | <i>Desi</i>      | Ca_Desig_denovo              | 26735864                       | (G/T)       |
| 44418       | CadSNP20013    | <i>Desi</i>      | Ca_Desig_denovo              | 26735904                       | (G/A)       |
| 44419       | CadSNP20014    | <i>Desi</i>      | Ca_Desig_denovo              | 26751836                       | (A/C)       |
| 44420       | CadSNP20015    | <i>Desi</i>      | Ca_Desig_denovo              | 26751838                       | (A/G)       |
| 44421       | CadSNP20016    | <i>Desi</i>      | Ca_Desig_denovo              | 26757155                       | (G/A)       |

| <b>S.N.</b> | <b>SNP IDs</b> | <b>Cultivars</b> | <b>Chromosomes/scaffolds</b> | <b>Physical positions (bp)</b> | <b>SNPs</b> |
|-------------|----------------|------------------|------------------------------|--------------------------------|-------------|
| 44422       | CadSNP20017    | <i>Desi</i>      | Ca_Desig_denovo              | 26757157                       | (T/G)       |
| 44423       | CadSNP20018    | <i>Desi</i>      | Ca_Desig_denovo              | 26785152                       | (C/G)       |
| 44424       | CadSNP20019    | <i>Desi</i>      | Ca_Desig_denovo              | 26785156                       | (G/T)       |
| 44425       | CadSNP20020    | <i>Desi</i>      | Ca_Desig_denovo              | 26803334                       | (C/G)       |
| 44426       | CadSNP20021    | <i>Desi</i>      | Ca_Desig_denovo              | 26826989                       | (G/A)       |
| 44427       | CadSNP20022    | <i>Desi</i>      | Ca_Desig_denovo              | 26827058                       | (A/C)       |
| 44428       | CadSNP20023    | <i>Desi</i>      | Ca_Desig_denovo              | 26841091                       | (G/C)       |
| 44429       | CadSNP20024    | <i>Desi</i>      | Ca_Desig_denovo              | 26853708                       | (A/G)       |
| 44430       | CadSNP20025    | <i>Desi</i>      | Ca_Desig_denovo              | 26887904                       | (A/G)       |
| 44431       | CadSNP20026    | <i>Desi</i>      | Ca_Desig_denovo              | 26909014                       | (G/C)       |
| 44432       | CadSNP20027    | <i>Desi</i>      | Ca_Desig_denovo              | 26913587                       | (G/C)       |
| 44433       | CadSNP20028    | <i>Desi</i>      | Ca_Desig_denovo              | 27089069                       | (A/G)       |
| 44434       | CadSNP20029    | <i>Desi</i>      | Ca_Desig_denovo              | 27089075                       | (G/C)       |
| 44435       | CadSNP20030    | <i>Desi</i>      | Ca_Desig_denovo              | 27125420                       | (T/C)       |
| 44436       | CadSNP20031    | <i>Desi</i>      | Ca_Desig_denovo              | 27125473                       | (C/T)       |
| 44437       | CadSNP20032    | <i>Desi</i>      | Ca_Desig_denovo              | 27143552                       | (C/G)       |
| 44438       | CadSNP20033    | <i>Desi</i>      | Ca_Desig_denovo              | 27150947                       | (T/G)       |
| 44439       | CadSNP20034    | <i>Desi</i>      | Ca_Desig_denovo              | 27207161                       | (C/T)       |
| 44440       | CadSNP20035    | <i>Desi</i>      | Ca_Desig_denovo              | 27207206                       | (G/A)       |
| 44441       | CadSNP20036    | <i>Desi</i>      | Ca_Desig_denovo              | 27210979                       | (T/C)       |
| 44442       | CadSNP20037    | <i>Desi</i>      | Ca_Desig_denovo              | 27210982                       | (G/A)       |
| 44443       | CadSNP20038    | <i>Desi</i>      | Ca_Desig_denovo              | 27254047                       | (A/G)       |
| 44444       | CadSNP20039    | <i>Desi</i>      | Ca_Desig_denovo              | 27254095                       | (A/G)       |
| 44445       | CadSNP20040    | <i>Desi</i>      | Ca_Desig_denovo              | 27268072                       | (C/G)       |
| 44446       | CadSNP20041    | <i>Desi</i>      | Ca_Desig_denovo              | 27268084                       | (A/C)       |
| 44447       | CadSNP20042    | <i>Desi</i>      | Ca_Desig_denovo              | 27272560                       | (T/G)       |
| 44448       | CadSNP20043    | <i>Desi</i>      | Ca_Desig_denovo              | 27318862                       | (C/T)       |
| 44449       | CadSNP20044    | <i>Desi</i>      | Ca_Desig_denovo              | 27348866                       | (A/G)       |
| 44450       | CadSNP20045    | <i>Desi</i>      | Ca_Desig_denovo              | 27349886                       | (C/G)       |
| 44451       | CadSNP20046    | <i>Desi</i>      | Ca_Desig_denovo              | 27350036                       | (A/T)       |
| 44452       | CadSNP20047    | <i>Desi</i>      | Ca_Desig_denovo              | 27350040                       | (C/T)       |
| 44453       | CadSNP20048    | <i>Desi</i>      | Ca_Desig_denovo              | 27361355                       | (A/G)       |
| 44454       | CadSNP20049    | <i>Desi</i>      | Ca_Desig_denovo              | 27361370                       | (C/G)       |
| 44455       | CadSNP20050    | <i>Desi</i>      | Ca_Desig_denovo              | 27421964                       | (C/T)       |
| 44456       | CadSNP20051    | <i>Desi</i>      | Ca_Desig_denovo              | 27440264                       | (C/T)       |
| 44457       | CadSNP20052    | <i>Desi</i>      | Ca_Desig_denovo              | 27440282                       | (C/A)       |
| 44458       | CadSNP20053    | <i>Desi</i>      | Ca_Desig_denovo              | 27440589                       | (C/A)       |
| 44459       | CadSNP20054    | <i>Desi</i>      | Ca_Desig_denovo              | 27440614                       | (G/A)       |

| <b>S.N.</b> | <b>SNP IDs</b> | <b>Cultivars</b> | <b>Chromosomes/scaffolds</b> | <b>Physical positions (bp)</b> | <b>SNPs</b> |
|-------------|----------------|------------------|------------------------------|--------------------------------|-------------|
| 44460       | CadSNP20055    | <i>Desi</i>      | Ca_Desig_denovo              | 27458264                       | (G/C)       |
| 44461       | CadSNP20056    | <i>Desi</i>      | Ca_Desig_denovo              | 27458265                       | (C/A)       |
| 44462       | CadSNP20057    | <i>Desi</i>      | Ca_Desig_denovo              | 27475760                       | (G/C)       |
| 44463       | CadSNP20058    | <i>Desi</i>      | Ca_Desig_denovo              | 27498463                       | (C/T)       |
| 44464       | CadSNP20059    | <i>Desi</i>      | Ca_Desig_denovo              | 27499873                       | (C/T)       |
| 44465       | CadSNP20060    | <i>Desi</i>      | Ca_Desig_denovo              | 27509063                       | (T/G)       |
| 44466       | CadSNP20061    | <i>Desi</i>      | Ca_Desig_denovo              | 27509069                       | (C/T)       |
| 44467       | CadSNP20062    | <i>Desi</i>      | Ca_Desig_denovo              | 27510349                       | (C/T)       |
| 44468       | CadSNP20063    | <i>Desi</i>      | Ca_Desig_denovo              | 27510353                       | (T/C)       |
| 44469       | CadSNP20064    | <i>Desi</i>      | Ca_Desig_denovo              | 27546524                       | (G/A)       |
| 44470       | CadSNP20065    | <i>Desi</i>      | Ca_Desig_denovo              | 27546536                       | (A/G)       |
| 44471       | CadSNP20066    | <i>Desi</i>      | Ca_Desig_denovo              | 27599245                       | (A/T)       |
| 44472       | CadSNP20067    | <i>Desi</i>      | Ca_Desig_denovo              | 27599279                       | (C/G)       |
| 44473       | CadSNP20068    | <i>Desi</i>      | Ca_Desig_denovo              | 27611733                       | (T/C)       |
| 44474       | CadSNP20069    | <i>Desi</i>      | Ca_Desig_denovo              | 27611741                       | (G/A)       |
| 44475       | CadSNP20070    | <i>Desi</i>      | Ca_Desig_denovo              | 27679006                       | (C/T)       |
| 44476       | CadSNP20071    | <i>Desi</i>      | Ca_Desig_denovo              | 27688853                       | (C/T)       |
| 44477       | CadSNP20072    | <i>Desi</i>      | Ca_Desig_denovo              | 27688861                       | (A/G)       |
| 44478       | CadSNP20073    | <i>Desi</i>      | Ca_Desig_denovo              | 27711250                       | (G/C)       |
| 44479       | CadSNP20074    | <i>Desi</i>      | Ca_Desig_denovo              | 27711266                       | (C/T)       |
| 44480       | CadSNP20075    | <i>Desi</i>      | Ca_Desig_denovo              | 27714198                       | (T/C)       |
| 44481       | CadSNP20076    | <i>Desi</i>      | Ca_Desig_denovo              | 27714199                       | (G/T)       |
| 44482       | CadSNP20077    | <i>Desi</i>      | Ca_Desig_denovo              | 27739496                       | (T/C)       |
| 44483       | CadSNP20078    | <i>Desi</i>      | Ca_Desig_denovo              | 27762278                       | (C/T)       |
| 44484       | CadSNP20079    | <i>Desi</i>      | Ca_Desig_denovo              | 27762296                       | (C/T)       |
| 44485       | CadSNP20080    | <i>Desi</i>      | Ca_Desig_denovo              | 27767009                       | (A/G)       |
| 44486       | CadSNP20081    | <i>Desi</i>      | Ca_Desig_denovo              | 27813709                       | (C/G)       |
| 44487       | CadSNP20082    | <i>Desi</i>      | Ca_Desig_denovo              | 27813722                       | (C/G)       |
| 44488       | CadSNP20083    | <i>Desi</i>      | Ca_Desig_denovo              | 27820770                       | (C/G)       |
| 44489       | CadSNP20084    | <i>Desi</i>      | Ca_Desig_denovo              | 27820775                       | (A/G)       |
| 44490       | CadSNP20085    | <i>Desi</i>      | Ca_Desig_denovo              | 27905129                       | (A/C)       |
| 44491       | CadSNP20086    | <i>Desi</i>      | Ca_Desig_denovo              | 27905178                       | (C/T)       |
| 44492       | CadSNP20087    | <i>Desi</i>      | Ca_Desig_denovo              | 27923742                       | (C/T)       |
| 44493       | CadSNP20088    | <i>Desi</i>      | Ca_Desig_denovo              | 27930522                       | (A/T)       |
| 44494       | CadSNP20089    | <i>Desi</i>      | Ca_Desig_denovo              | 27937684                       | (C/T)       |
| 44495       | CadSNP20090    | <i>Desi</i>      | Ca_Desig_denovo              | 27937723                       | (A/G)       |
| 44496       | CadSNP20091    | <i>Desi</i>      | Ca_Desig_denovo              | 28003445                       | (C/A)       |
| 44497       | CadSNP20092    | <i>Desi</i>      | Ca_Desig_denovo              | 28006335                       | (A/G)       |

| <b>S.N.</b> | <b>SNP IDs</b> | <b>Cultivars</b> | <b>Chromosomes/scaffolds</b> | <b>Physical positions (bp)</b> | <b>SNPs</b> |
|-------------|----------------|------------------|------------------------------|--------------------------------|-------------|
| 44498       | CadSNP20093    | <i>Desi</i>      | Ca_Desig_denovo              | 28017969                       | (A/G)       |
| 44499       | CadSNP20094    | <i>Desi</i>      | Ca_Desig_denovo              | 28026334                       | (C/G)       |
| 44500       | CadSNP20095    | <i>Desi</i>      | Ca_Desig_denovo              | 28030234                       | (T/C)       |
| 44501       | CadSNP20096    | <i>Desi</i>      | Ca_Desig_denovo              | 28048013                       | (G/C)       |
| 44502       | CadSNP20097    | <i>Desi</i>      | Ca_Desig_denovo              | 28188992                       | (C/G)       |
| 44503       | CadSNP20098    | <i>Desi</i>      | Ca_Desig_denovo              | 28189027                       | (A/G)       |
| 44504       | CadSNP20099    | <i>Desi</i>      | Ca_Desig_denovo              | 28243407                       | (T/C)       |
| 44505       | CadSNP20100    | <i>Desi</i>      | Ca_Desig_denovo              | 28243419                       | (A/G)       |
| 44506       | CadSNP20101    | <i>Desi</i>      | Ca_Desig_denovo              | 28266095                       | (C/T)       |
| 44507       | CadSNP20102    | <i>Desi</i>      | Ca_Desig_denovo              | 28266137                       | (C/T)       |
| 44508       | CadSNP20103    | <i>Desi</i>      | Ca_Desig_denovo              | 28311068                       | (C/T)       |
| 44509       | CadSNP20104    | <i>Desi</i>      | Ca_Desig_denovo              | 28311094                       | (T/G)       |
| 44510       | CadSNP20105    | <i>Desi</i>      | Ca_Desig_denovo              | 28312115                       | (T/C)       |
| 44511       | CadSNP20106    | <i>Desi</i>      | Ca_Desig_denovo              | 28327294                       | (G/A)       |
| 44512       | CadSNP20107    | <i>Desi</i>      | Ca_Desig_denovo              | 28411642                       | (C/T)       |
| 44513       | CadSNP20108    | <i>Desi</i>      | Ca_Desig_denovo              | 28450487                       | (G/A)       |
| 44514       | CadSNP20109    | <i>Desi</i>      | Ca_Desig_denovo              | 28473005                       | (C/G)       |
| 44515       | CadSNP20110    | <i>Desi</i>      | Ca_Desig_denovo              | 28476167                       | (T/G)       |
| 44516       | CadSNP20111    | <i>Desi</i>      | Ca_Desig_denovo              | 28476168                       | (A/G)       |
| 44517       | CadSNP20112    | <i>Desi</i>      | Ca_Desig_denovo              | 28506485                       | (T/C)       |
| 44518       | CadSNP20113    | <i>Desi</i>      | Ca_Desig_denovo              | 28544636                       | (G/A)       |
| 44519       | CadSNP20114    | <i>Desi</i>      | Ca_Desig_denovo              | 28544642                       | (T/C)       |
| 44520       | CadSNP20115    | <i>Desi</i>      | Ca_Desig_denovo              | 28555009                       | (C/T)       |
| 44521       | CadSNP20116    | <i>Desi</i>      | Ca_Desig_denovo              | 28555016                       | (A/G)       |
| 44522       | CadSNP20117    | <i>Desi</i>      | Ca_Desig_denovo              | 28575480                       | (T/G)       |
| 44523       | CadSNP20118    | <i>Desi</i>      | Ca_Desig_denovo              | 28575518                       | (T/C)       |
| 44524       | CadSNP20119    | <i>Desi</i>      | Ca_Desig_denovo              | 28579005                       | (C/T)       |
| 44525       | CadSNP20120    | <i>Desi</i>      | Ca_Desig_denovo              | 28602439                       | (C/G)       |
| 44526       | CadSNP20121    | <i>Desi</i>      | Ca_Desig_denovo              | 28602740                       | (G/A)       |
| 44527       | CadSNP20122    | <i>Desi</i>      | Ca_Desig_denovo              | 28645146                       | (A/G)       |
| 44528       | CadSNP20123    | <i>Desi</i>      | Ca_Desig_denovo              | 28659498                       | (C/T)       |
| 44529       | CadSNP20124    | <i>Desi</i>      | Ca_Desig_denovo              | 28699646                       | (G/A)       |
| 44530       | CadSNP20125    | <i>Desi</i>      | Ca_Desig_denovo              | 28719465                       | (C/G)       |
| 44531       | CadSNP20126    | <i>Desi</i>      | Ca_Desig_denovo              | 28719481                       | (G/A)       |
| 44532       | CadSNP20127    | <i>Desi</i>      | Ca_Desig_denovo              | 28727465                       | (A/G)       |
| 44533       | CadSNP20128    | <i>Desi</i>      | Ca_Desig_denovo              | 28738744                       | (C/T)       |
| 44534       | CadSNP20129    | <i>Desi</i>      | Ca_Desig_denovo              | 28750047                       | (C/T)       |
| 44535       | CadSNP20130    | <i>Desi</i>      | Ca_Desig_denovo              | 28750050                       | (A/G)       |

| <b>S.N.</b> | <b>SNP IDs</b> | <b>Cultivars</b> | <b>Chromosomes/scaffolds</b> | <b>Physical positions (bp)</b> | <b>SNPs</b> |
|-------------|----------------|------------------|------------------------------|--------------------------------|-------------|
| 44536       | CadSNP20131    | <i>Desi</i>      | Ca_Desig_denovo              | 28796900                       | (C/T)       |
| 44537       | CadSNP20132    | <i>Desi</i>      | Ca_Desig_denovo              | 28796924                       | (A/G)       |
| 44538       | CadSNP20133    | <i>Desi</i>      | Ca_Desig_denovo              | 28821296                       | (C/T)       |
| 44539       | CadSNP20134    | <i>Desi</i>      | Ca_Desig_denovo              | 28821317                       | (C/T)       |
| 44540       | CadSNP20135    | <i>Desi</i>      | Ca_Desig_denovo              | 28838205                       | (A/G)       |
| 44541       | CadSNP20136    | <i>Desi</i>      | Ca_Desig_denovo              | 28838221                       | (A/G)       |
| 44542       | CadSNP20137    | <i>Desi</i>      | Ca_Desig_denovo              | 28840509                       | (A/C)       |
| 44543       | CadSNP20138    | <i>Desi</i>      | Ca_Desig_denovo              | 28840510                       | (G/C)       |
| 44544       | CadSNP20139    | <i>Desi</i>      | Ca_Desig_denovo              | 28863027                       | (G/T)       |
| 44545       | CadSNP20140    | <i>Desi</i>      | Ca_Desig_denovo              | 28903730                       | (A/G)       |
| 44546       | CadSNP20141    | <i>Desi</i>      | Ca_Desig_denovo              | 28942313                       | (G/A)       |
| 44547       | CadSNP20142    | <i>Desi</i>      | Ca_Desig_denovo              | 28949777                       | (C/T)       |
| 44548       | CadSNP20143    | <i>Desi</i>      | Ca_Desig_denovo              | 29032209                       | (T/C)       |
| 44549       | CadSNP20144    | <i>Desi</i>      | Ca_Desig_denovo              | 29082567                       | (G/A)       |
| 44550       | CadSNP20145    | <i>Desi</i>      | Ca_Desig_denovo              | 29128466                       | (A/G)       |
| 44551       | CadSNP20146    | <i>Desi</i>      | Ca_Desig_denovo              | 29128481                       | (C/T)       |
| 44552       | CadSNP20147    | <i>Desi</i>      | Ca_Desig_denovo              | 29183609                       | (T/G)       |
| 44553       | CadSNP20148    | <i>Desi</i>      | Ca_Desig_denovo              | 29198801                       | (C/T)       |
| 44554       | CadSNP20149    | <i>Desi</i>      | Ca_Desig_denovo              | 29209116                       | (A/G)       |
| 44555       | CadSNP20150    | <i>Desi</i>      | Ca_Desig_denovo              | 29209128                       | (C/T)       |
| 44556       | CadSNP20151    | <i>Desi</i>      | Ca_Desig_denovo              | 29217591                       | (C/T)       |
| 44557       | CadSNP20152    | <i>Desi</i>      | Ca_Desig_denovo              | 29217614                       | (C/T)       |
| 44558       | CadSNP20153    | <i>Desi</i>      | Ca_Desig_denovo              | 29236025                       | (T/C)       |
| 44559       | CadSNP20154    | <i>Desi</i>      | Ca_Desig_denovo              | 29255732                       | (C/T)       |
| 44560       | CadSNP20155    | <i>Desi</i>      | Ca_Desig_denovo              | 29274831                       | (C/A)       |
| 44561       | CadSNP20156    | <i>Desi</i>      | Ca_Desig_denovo              | 29317150                       | (C/A)       |
| 44562       | CadSNP20157    | <i>Desi</i>      | Ca_Desig_denovo              | 29321638                       | (C/G)       |
| 44563       | CadSNP20158    | <i>Desi</i>      | Ca_Desig_denovo              | 29338254                       | (T/A)       |
| 44564       | CadSNP20159    | <i>Desi</i>      | Ca_Desig_denovo              | 29408537                       | (C/G)       |
| 44565       | CadSNP20160    | <i>Desi</i>      | Ca_Desig_denovo              | 29408549                       | (C/G)       |
| 44566       | CadSNP20161    | <i>Desi</i>      | Ca_Desig_denovo              | 29412410                       | (T/G)       |
| 44567       | CadSNP20162    | <i>Desi</i>      | Ca_Desig_denovo              | 29414358                       | (G/A)       |
| 44568       | CadSNP20163    | <i>Desi</i>      | Ca_Desig_denovo              | 29414376                       | (G/C)       |
| 44569       | CadSNP20164    | <i>Desi</i>      | Ca_Desig_denovo              | 29415932                       | (T/C)       |
| 44570       | CadSNP20165    | <i>Desi</i>      | Ca_Desig_denovo              | 29415940                       | (A/G)       |
| 44571       | CadSNP20166    | <i>Desi</i>      | Ca_Desig_denovo              | 29454783                       | (T/C)       |
| 44572       | CadSNP20167    | <i>Desi</i>      | Ca_Desig_denovo              | 29560256                       | (T/A)       |
| 44573       | CadSNP20168    | <i>Desi</i>      | Ca_Desig_denovo              | 29562856                       | (G/A)       |

| <b>S.N.</b> | <b>SNP IDs</b> | <b>Cultivars</b> | <b>Chromosomes/scaffolds</b> | <b>Physical positions (bp)</b> | <b>SNPs</b> |
|-------------|----------------|------------------|------------------------------|--------------------------------|-------------|
| 44574       | CadSNP20169    | <i>Desi</i>      | Ca_Desig_denovo              | 29562907                       | (A/G)       |
| 44575       | CadSNP20170    | <i>Desi</i>      | Ca_Desig_denovo              | 29626617                       | (G/T)       |
| 44576       | CadSNP20171    | <i>Desi</i>      | Ca_Desig_denovo              | 29640698                       | (A/G)       |
| 44577       | CadSNP20172    | <i>Desi</i>      | Ca_Desig_denovo              | 29640722                       | (G/A)       |
| 44578       | CadSNP20173    | <i>Desi</i>      | Ca_Desig_denovo              | 29657155                       | (T/C)       |
| 44579       | CadSNP20174    | <i>Desi</i>      | Ca_Desig_denovo              | 29674918                       | (A/G)       |
| 44580       | CadSNP20175    | <i>Desi</i>      | Ca_Desig_denovo              | 29674925                       | (G/A)       |
| 44581       | CadSNP20176    | <i>Desi</i>      | Ca_Desig_denovo              | 29676596                       | (G/A)       |
| 44582       | CadSNP20177    | <i>Desi</i>      | Ca_Desig_denovo              | 29676629                       | (T/C)       |
| 44583       | CadSNP20178    | <i>Desi</i>      | Ca_Desig_denovo              | 29678862                       | (C/G)       |
| 44584       | CadSNP20179    | <i>Desi</i>      | Ca_Desig_denovo              | 29683065                       | (G/T)       |
| 44585       | CadSNP20180    | <i>Desi</i>      | Ca_Desig_denovo              | 29713880                       | (T/C)       |
| 44586       | CadSNP20181    | <i>Desi</i>      | Ca_Desig_denovo              | 29713906                       | (G/A)       |
| 44587       | CadSNP20182    | <i>Desi</i>      | Ca_Desig_denovo              | 29722670                       | (G/T)       |
| 44588       | CadSNP20183    | <i>Desi</i>      | Ca_Desig_denovo              | 29795074                       | (G/A)       |
| 44589       | CadSNP20184    | <i>Desi</i>      | Ca_Desig_denovo              | 29795117                       | (A/C)       |
| 44590       | CadSNP20185    | <i>Desi</i>      | Ca_Desig_denovo              | 29798534                       | (A/G)       |
| 44591       | CadSNP20186    | <i>Desi</i>      | Ca_Desig_denovo              | 29801025                       | (A/G)       |
| 44592       | CadSNP20187    | <i>Desi</i>      | Ca_Desig_denovo              | 29804482                       | (A/G)       |
| 44593       | CadSNP20188    | <i>Desi</i>      | Ca_Desig_denovo              | 29804514                       | (C/T)       |
| 44594       | CadSNP20189    | <i>Desi</i>      | Ca_Desig_denovo              | 29808189                       | (G/A)       |
| 44595       | CadSNP20190    | <i>Desi</i>      | Ca_Desig_denovo              | 29808223                       | (A/G)       |
| 44596       | CadSNP20191    | <i>Desi</i>      | Ca_Desig_denovo              | 29843243                       | (A/G)       |
| 44597       | CadSNP20192    | <i>Desi</i>      | Ca_Desig_denovo              | 29843260                       | (G/A)       |
| 44598       | CadSNP20193    | <i>Desi</i>      | Ca_Desig_denovo              | 29850266                       | (C/T)       |
| 44599       | CadSNP20194    | <i>Desi</i>      | Ca_Desig_denovo              | 29881790                       | (A/G)       |
| 44600       | CadSNP20195    | <i>Desi</i>      | Ca_Desig_denovo              | 29913503                       | (T/C)       |
| 44601       | CadSNP20196    | <i>Desi</i>      | Ca_Desig_denovo              | 29913505                       | (T/C)       |
| 44602       | CadSNP20197    | <i>Desi</i>      | Ca_Desig_denovo              | 29965839                       | (A/T)       |
| 44603       | CadSNP20198    | <i>Desi</i>      | Ca_Desig_denovo              | 29968094                       | (A/G)       |
| 44604       | CadSNP20199    | <i>Desi</i>      | Ca_Desig_denovo              | 29968121                       | (A/G)       |
| 44605       | CadSNP20200    | <i>Desi</i>      | Ca_Desig_denovo              | 30023670                       | (A/G)       |
| 44606       | CadSNP20201    | <i>Desi</i>      | Ca_Desig_denovo              | 30023709                       | (G/A)       |
| 44607       | CadSNP20202    | <i>Desi</i>      | Ca_Desig_denovo              | 30037253                       | (A/G)       |
| 44608       | CadSNP20203    | <i>Desi</i>      | Ca_Desig_denovo              | 30037271                       | (G/C)       |
| 44609       | CadSNP20204    | <i>Desi</i>      | Ca_Desig_denovo              | 30079472                       | (T/C)       |
| 44610       | CadSNP20205    | <i>Desi</i>      | Ca_Desig_denovo              | 30079544                       | (C/T)       |
| 44611       | CadSNP20206    | <i>Desi</i>      | Ca_Desig_denovo              | 30091151                       | (A/G)       |



| <b>S.N.</b> | <b>SNP IDs</b> | <b>Cultivars</b> | <b>Chromosomes/scaffolds</b> | <b>Physical positions (bp)</b> | <b>SNPs</b> |
|-------------|----------------|------------------|------------------------------|--------------------------------|-------------|
| 44612       | CadSNP20207    | <i>Desi</i>      | Ca_Desig_denovo              | 30104868                       | (A/G)       |
| 44613       | CadSNP20208    | <i>Desi</i>      | Ca_Desig_denovo              | 30104881                       | (A/C)       |
| 44614       | CadSNP20209    | <i>Desi</i>      | Ca_Desig_denovo              | 30228947                       | (G/T)       |
| 44615       | CadSNP20210    | <i>Desi</i>      | Ca_Desig_denovo              | 30228968                       | (A/G)       |
| 44616       | CadSNP20211    | <i>Desi</i>      | Ca_Desig_denovo              | 30278596                       | (C/T)       |
| 44617       | CadSNP20212    | <i>Desi</i>      | Ca_Desig_denovo              | 30296011                       | (C/A)       |
| 44618       | CadSNP20213    | <i>Desi</i>      | Ca_Desig_denovo              | 30313412                       | (A/G)       |
| 44619       | CadSNP20214    | <i>Desi</i>      | Ca_Desig_denovo              | 30313430                       | (A/G)       |
| 44620       | CadSNP20215    | <i>Desi</i>      | Ca_Desig_denovo              | 30487207                       | (A/G)       |
| 44621       | CadSNP20216    | <i>Desi</i>      | Ca_Desig_denovo              | 30498368                       | (C/T)       |
| 44622       | CadSNP20217    | <i>Desi</i>      | Ca_Desig_denovo              | 30540504                       | (G/A)       |
| 44623       | CadSNP20218    | <i>Desi</i>      | Ca_Desig_denovo              | 30577130                       | (C/A)       |
| 44624       | CadSNP20219    | <i>Desi</i>      | Ca_Desig_denovo              | 30583346                       | (G/A)       |
| 44625       | CadSNP20220    | <i>Desi</i>      | Ca_Desig_denovo              | 30642522                       | (A/G)       |
| 44626       | CadSNP20221    | <i>Desi</i>      | Ca_Desig_denovo              | 30664897                       | (G/A)       |
| 44627       | CadSNP20222    | <i>Desi</i>      | Ca_Desig_denovo              | 30664931                       | (A/G)       |
| 44628       | CadSNP20223    | <i>Desi</i>      | Ca_Desig_denovo              | 30664948                       | (C/G)       |
| 44629       | CadSNP20224    | <i>Desi</i>      | Ca_Desig_denovo              | 30664958                       | (A/G)       |
| 44630       | CadSNP20225    | <i>Desi</i>      | Ca_Desig_denovo              | 30699603                       | (C/A)       |
| 44631       | CadSNP20226    | <i>Desi</i>      | Ca_Desig_denovo              | 30699620                       | (T/A)       |
| 44632       | CadSNP20227    | <i>Desi</i>      | Ca_Desig_denovo              | 30741190                       | (C/T)       |
| 44633       | CadSNP20228    | <i>Desi</i>      | Ca_Desig_denovo              | 30744436                       | (C/T)       |
| 44634       | CadSNP20229    | <i>Desi</i>      | Ca_Desig_denovo              | 30757242                       | (A/T)       |
| 44635       | CadSNP20230    | <i>Desi</i>      | Ca_Desig_denovo              | 30757253                       | (G/A)       |
| 44636       | CadSNP20231    | <i>Desi</i>      | Ca_Desig_denovo              | 30793516                       | (G/A)       |
| 44637       | CadSNP20232    | <i>Desi</i>      | Ca_Desig_denovo              | 30793597                       | (G/T)       |
| 44638       | CadSNP20233    | <i>Desi</i>      | Ca_Desig_denovo              | 30793599                       | (T/C)       |
| 44639       | CadSNP20234    | <i>Desi</i>      | Ca_Desig_denovo              | 30820487                       | (G/A)       |
| 44640       | CadSNP20235    | <i>Desi</i>      | Ca_Desig_denovo              | 30820571                       | (T/A)       |
| 44641       | CadSNP20236    | <i>Desi</i>      | Ca_Desig_denovo              | 30827844                       | (T/C)       |
| 44642       | CadSNP20237    | <i>Desi</i>      | Ca_Desig_denovo              | 30827846                       | (A/G)       |
| 44643       | CadSNP20238    | <i>Desi</i>      | Ca_Desig_denovo              | 30830113                       | (T/G)       |
| 44644       | CadSNP20239    | <i>Desi</i>      | Ca_Desig_denovo              | 30830146                       | (T/G)       |
| 44645       | CadSNP20240    | <i>Desi</i>      | Ca_Desig_denovo              | 30830374                       | (G/C)       |
| 44646       | CadSNP20241    | <i>Desi</i>      | Ca_Desig_denovo              | 30830375                       | (C/G)       |
| 44647       | CadSNP20242    | <i>Desi</i>      | Ca_Desig_denovo              | 30830377                       | (G/T)       |
| 44648       | CadSNP20243    | <i>Desi</i>      | Ca_Desig_denovo              | 30830379                       | (C/T)       |
| 44649       | CadSNP20244    | <i>Desi</i>      | Ca_Desig_denovo              | 30830380                       | (A/C)       |

| <b>S.N.</b> | <b>SNP IDs</b> | <b>Cultivars</b> | <b>Chromosomes/scaffolds</b> | <b>Physical positions (bp)</b> | <b>SNPs</b> |
|-------------|----------------|------------------|------------------------------|--------------------------------|-------------|
| 44650       | CadSNP20245    | <i>Desi</i>      | Ca_Desig_denovo              | 30830744                       | (G/T)       |
| 44651       | CadSNP20246    | <i>Desi</i>      | Ca_Desig_denovo              | 30831491                       | (C/G)       |
| 44652       | CadSNP20247    | <i>Desi</i>      | Ca_Desig_denovo              | 30831493                       | (G/T)       |
| 44653       | CadSNP20248    | <i>Desi</i>      | Ca_Desig_denovo              | 30831495                       | (C/T)       |
| 44654       | CadSNP20249    | <i>Desi</i>      | Ca_Desig_denovo              | 30833979                       | (T/G)       |
| 44655       | CadSNP20250    | <i>Desi</i>      | Ca_Desig_denovo              | 30833991                       | (G/T)       |
| 44656       | CadSNP20251    | <i>Desi</i>      | Ca_Desig_denovo              | 30834026                       | (A/G)       |
| 44657       | CadSNP20252    | <i>Desi</i>      | Ca_Desig_denovo              | 30835738                       | (G/T)       |
| 44658       | CadSNP20253    | <i>Desi</i>      | Ca_Desig_denovo              | 30835766                       | (T/G)       |
| 44659       | CadSNP20254    | <i>Desi</i>      | Ca_Desig_denovo              | 30835772                       | (A/G)       |
| 44660       | CadSNP20255    | <i>Desi</i>      | Ca_Desig_denovo              | 30835789                       | (G/A)       |
| 44661       | CadSNP20256    | <i>Desi</i>      | Ca_Desig_denovo              | 30840037                       | (T/G)       |
| 44662       | CadSNP20257    | <i>Desi</i>      | Ca_Desig_denovo              | 30840039                       | (A/G)       |
| 44663       | CadSNP20258    | <i>Desi</i>      | Ca_Desig_denovo              | 30840069                       | (A/G)       |
| 44664       | CadSNP20259    | <i>Desi</i>      | Ca_Desig_denovo              | 30842831                       | (A/G)       |
| 44665       | CadSNP20260    | <i>Desi</i>      | Ca_Desig_denovo              | 30842833                       | (A/G)       |
| 44666       | CadSNP20261    | <i>Desi</i>      | Ca_Desig_denovo              | 30842834                       | (A/G)       |
| 44667       | CadSNP20262    | <i>Desi</i>      | Ca_Desig_denovo              | 30842835                       | (G/A)       |
| 44668       | CadSNP20263    | <i>Desi</i>      | Ca_Desig_denovo              | 30869247                       | (C/A)       |
| 44669       | CadSNP20264    | <i>Desi</i>      | Ca_Desig_denovo              | 30872588                       | (C/G)       |
| 44670       | CadSNP20265    | <i>Desi</i>      | Ca_Desig_denovo              | 30872613                       | (C/G)       |
| 44671       | CadSNP20266    | <i>Desi</i>      | Ca_Desig_denovo              | 30872634                       | (A/G)       |
| 44672       | CadSNP20267    | <i>Desi</i>      | Ca_Desig_denovo              | 30878095                       | (G/A)       |
| 44673       | CadSNP20268    | <i>Desi</i>      | Ca_Desig_denovo              | 30878097                       | (A/T)       |
| 44674       | CadSNP20269    | <i>Desi</i>      | Ca_Desig_denovo              | 30878098                       | (G/T)       |
| 44675       | CadSNP20270    | <i>Desi</i>      | Ca_Desig_denovo              | 30878099                       | (C/G)       |
| 44676       | CadSNP20271    | <i>Desi</i>      | Ca_Desig_denovo              | 30902520                       | (C/G)       |
| 44677       | CadSNP20272    | <i>Desi</i>      | Ca_Desig_denovo              | 30920646                       | (G/A)       |
| 44678       | CadSNP20273    | <i>Desi</i>      | Ca_Desig_denovo              | 30920674                       | (T/G)       |
| 44679       | CadSNP20274    | <i>Desi</i>      | Ca_Desig_denovo              | 30920724                       | (G/C)       |
| 44680       | CadSNP20275    | <i>Desi</i>      | Ca_Desig_denovo              | 30921882                       | (A/G)       |
| 44681       | CadSNP20276    | <i>Desi</i>      | Ca_Desig_denovo              | 30921936                       | (T/G)       |
| 44682       | CadSNP20277    | <i>Desi</i>      | Ca_Desig_denovo              | 30925781                       | (G/T)       |
| 44683       | CadSNP20278    | <i>Desi</i>      | Ca_Desig_denovo              | 31078584                       | (A/G)       |
| 44684       | CadSNP20279    | <i>Desi</i>      | Ca_Desig_denovo              | 31078597                       | (C/T)       |
| 44685       | CadSNP20280    | <i>Desi</i>      | Ca_Desig_denovo              | 31085169                       | (T/C)       |
| 44686       | CadSNP20281    | <i>Desi</i>      | Ca_Desig_denovo              | 31542828                       | (A/C)       |
| 44687       | CadSNP20282    | <i>Desi</i>      | Ca_Desig_denovo              | 31542838                       | (C/T)       |

| <b>S.N.</b> | <b>SNP IDs</b> | <b>Cultivars</b> | <b>Chromosomes/scaffolds</b> | <b>Physical positions (bp)</b> | <b>SNPs</b> |
|-------------|----------------|------------------|------------------------------|--------------------------------|-------------|
| 44688       | CadSNP20283    | <i>Desi</i>      | Ca_Desig_denovo              | 31759809                       | (A/G)       |
| 44689       | CadSNP20284    | <i>Desi</i>      | Ca_Desig_denovo              | 31759836                       | (T/C)       |
| 44690       | CadSNP20285    | <i>Desi</i>      | Ca_Desig_denovo              | 31811245                       | (C/G)       |
| 44691       | CadSNP20286    | <i>Desi</i>      | Ca_Desig_denovo              | 31830314                       | (A/G)       |
| 44692       | CadSNP20287    | <i>Desi</i>      | Ca_Desig_denovo              | 31830320                       | (C/G)       |
| 44693       | CadSNP20288    | <i>Desi</i>      | Ca_Desig_denovo              | 31842859                       | (A/G)       |
| 44694       | CadSNP20289    | <i>Desi</i>      | Ca_Desig_denovo              | 31847329                       | (G/C)       |
| 44695       | CadSNP20290    | <i>Desi</i>      | Ca_Desig_denovo              | 31847338                       | (T/C)       |
| 44696       | CadSNP20291    | <i>Desi</i>      | Ca_Desig_denovo              | 31925366                       | (T/G)       |
| 44697       | CadSNP20292    | <i>Desi</i>      | Ca_Desig_denovo              | 31925413                       | (A/C)       |
| 44698       | CadSNP20293    | <i>Desi</i>      | Ca_Desig_denovo              | 31933010                       | (C/T)       |
| 44699       | CadSNP20294    | <i>Desi</i>      | Ca_Desig_denovo              | 31950260                       | (T/C)       |
| 44700       | CadSNP20295    | <i>Desi</i>      | Ca_Desig_denovo              | 31950266                       | (A/G)       |
| 44701       | CadSNP20296    | <i>Desi</i>      | Ca_Desig_denovo              | 32026141                       | (G/T)       |
| 44702       | CadSNP20297    | <i>Desi</i>      | Ca_Desig_denovo              | 32050995                       | (A/G)       |
| 44703       | CadSNP20298    | <i>Desi</i>      | Ca_Desig_denovo              | 32068492                       | (T/C)       |
| 44704       | CadSNP20299    | <i>Desi</i>      | Ca_Desig_denovo              | 32068520                       | (T/G)       |
| 44705       | CadSNP20300    | <i>Desi</i>      | Ca_Desig_denovo              | 32076855                       | (T/C)       |
| 44706       | CadSNP20301    | <i>Desi</i>      | Ca_Desig_denovo              | 32076881                       | (A/C)       |
| 44707       | CadSNP20302    | <i>Desi</i>      | Ca_Desig_denovo              | 32080747                       | (A/C)       |
| 44708       | CadSNP20303    | <i>Desi</i>      | Ca_Desig_denovo              | 32080753                       | (A/G)       |
| 44709       | CadSNP20304    | <i>Desi</i>      | Ca_Desig_denovo              | 32085959                       | (C/G)       |
| 44710       | CadSNP20305    | <i>Desi</i>      | Ca_Desig_denovo              | 32085962                       | (C/T)       |
| 44711       | CadSNP20306    | <i>Desi</i>      | Ca_Desig_denovo              | 32096471                       | (G/C)       |
| 44712       | CadSNP20307    | <i>Desi</i>      | Ca_Desig_denovo              | 32096492                       | (C/G)       |
| 44713       | CadSNP20308    | <i>Desi</i>      | Ca_Desig_denovo              | 32102894                       | (G/A)       |
| 44714       | CadSNP20309    | <i>Desi</i>      | Ca_Desig_denovo              | 32102906                       | (G/A)       |
| 44715       | CadSNP20310    | <i>Desi</i>      | Ca_Desig_denovo              | 32103632                       | (T/C)       |
| 44716       | CadSNP20311    | <i>Desi</i>      | Ca_Desig_denovo              | 32105704                       | (G/A)       |
| 44717       | CadSNP20312    | <i>Desi</i>      | Ca_Desig_denovo              | 32128616                       | (A/C)       |
| 44718       | CadSNP20313    | <i>Desi</i>      | Ca_Desig_denovo              | 32128617                       | (G/C)       |
| 44719       | CadSNP20314    | <i>Desi</i>      | Ca_Desig_denovo              | 32213072                       | (A/G)       |
| 44720       | CadSNP20315    | <i>Desi</i>      | Ca_Desig_denovo              | 32213080                       | (C/G)       |
| 44721       | CadSNP20316    | <i>Desi</i>      | Ca_Desig_denovo              | 32224615                       | (C/G)       |
| 44722       | CadSNP20317    | <i>Desi</i>      | Ca_Desig_denovo              | 32236273                       | (C/G)       |
| 44723       | CadSNP20318    | <i>Desi</i>      | Ca_Desig_denovo              | 32237075                       | (T/G)       |
| 44724       | CadSNP20319    | <i>Desi</i>      | Ca_Desig_denovo              | 32237087                       | (C/G)       |
| 44725       | CadSNP20320    | <i>Desi</i>      | Ca_Desig_denovo              | 32286821                       | (G/A)       |

| <b>S.N.</b> | <b>SNP IDs</b> | <b>Cultivars</b> | <b>Chromosomes/scaffolds</b> | <b>Physical positions (bp)</b> | <b>SNPs</b> |
|-------------|----------------|------------------|------------------------------|--------------------------------|-------------|
| 44726       | CadSNP20321    | <i>Desi</i>      | Ca_Desig_denovo              | 32286839                       | (G/A)       |
| 44727       | CadSNP20322    | <i>Desi</i>      | Ca_Desig_denovo              | 32374596                       | (A/C)       |
| 44728       | CadSNP20323    | <i>Desi</i>      | Ca_Desig_denovo              | 32374597                       | (G/C)       |
| 44729       | CadSNP20324    | <i>Desi</i>      | Ca_Desig_denovo              | 32374599                       | (T/C)       |
| 44730       | CadSNP20325    | <i>Desi</i>      | Ca_Desig_denovo              | 32432674                       | (G/A)       |
| 44731       | CadSNP20326    | <i>Desi</i>      | Ca_Desig_denovo              | 32432692                       | (C/A)       |
| 44732       | CadSNP20327    | <i>Desi</i>      | Ca_Desig_denovo              | 32432698                       | (T/C)       |
| 44733       | CadSNP20328    | <i>Desi</i>      | Ca_Desig_denovo              | 32467444                       | (A/G)       |
| 44734       | CadSNP20329    | <i>Desi</i>      | Ca_Desig_denovo              | 32467445                       | (T/C)       |
| 44735       | CadSNP20330    | <i>Desi</i>      | Ca_Desig_denovo              | 32518308                       | (C/G)       |
| 44736       | CadSNP20331    | <i>Desi</i>      | Ca_Desig_denovo              | 32518335                       | (T/G)       |
| 44737       | CadSNP20332    | <i>Desi</i>      | Ca_Desig_denovo              | 32526371                       | (A/C)       |
| 44738       | CadSNP20333    | <i>Desi</i>      | Ca_Desig_denovo              | 32528556                       | (C/G)       |
| 44739       | CadSNP20334    | <i>Desi</i>      | Ca_Desig_denovo              | 32528579                       | (C/T)       |
| 44740       | CadSNP20335    | <i>Desi</i>      | Ca_Desig_denovo              | 32566013                       | (G/C)       |
| 44741       | CadSNP20336    | <i>Desi</i>      | Ca_Desig_denovo              | 32567816                       | (C/A)       |
| 44742       | CadSNP20337    | <i>Desi</i>      | Ca_Desig_denovo              | 32567824                       | (C/T)       |
| 44743       | CadSNP20338    | <i>Desi</i>      | Ca_Desig_denovo              | 32586766                       | (T/C)       |
| 44744       | CadSNP20339    | <i>Desi</i>      | Ca_Desig_denovo              | 32618742                       | (A/G)       |
| 44745       | CadSNP20340    | <i>Desi</i>      | Ca_Desig_denovo              | 32618776                       | (G/C)       |
| 44746       | CadSNP20341    | <i>Desi</i>      | Ca_Desig_denovo              | 32629071                       | (C/T)       |
| 44747       | CadSNP20342    | <i>Desi</i>      | Ca_Desig_denovo              | 32629092                       | (C/T)       |
| 44748       | CadSNP20343    | <i>Desi</i>      | Ca_Desig_denovo              | 32650369                       | (T/G)       |
| 44749       | CadSNP20344    | <i>Desi</i>      | Ca_Desig_denovo              | 32650385                       | (A/G)       |
| 44750       | CadSNP20345    | <i>Desi</i>      | Ca_Desig_denovo              | 32664214                       | (G/T)       |
| 44751       | CadSNP20346    | <i>Desi</i>      | Ca_Desig_denovo              | 32664249                       | (T/C)       |
| 44752       | CadSNP20347    | <i>Desi</i>      | Ca_Desig_denovo              | 32668889                       | (A/G)       |
| 44753       | CadSNP20348    | <i>Desi</i>      | Ca_Desig_denovo              | 32668892                       | (G/C)       |
| 44754       | CadSNP20349    | <i>Desi</i>      | Ca_Desig_denovo              | 32684063                       | (G/T)       |
| 44755       | CadSNP20350    | <i>Desi</i>      | Ca_Desig_denovo              | 32684100                       | (A/T)       |
| 44756       | CadSNP20351    | <i>Desi</i>      | Ca_Desig_denovo              | 32688548                       | (G/C)       |
| 44757       | CadSNP20352    | <i>Desi</i>      | Ca_Desig_denovo              | 32688798                       | (G/T)       |
| 44758       | CadSNP20353    | <i>Desi</i>      | Ca_Desig_denovo              | 32745140                       | (G/C)       |
| 44759       | CadSNP20354    | <i>Desi</i>      | Ca_Desig_denovo              | 32745142                       | (C/A)       |
| 44760       | CadSNP20355    | <i>Desi</i>      | Ca_Desig_denovo              | 32834033                       | (A/G)       |
| 44761       | CadSNP20356    | <i>Desi</i>      | Ca_Desig_denovo              | 32834077                       | (T/C)       |
| 44762       | CadSNP20357    | <i>Desi</i>      | Ca_Desig_denovo              | 32834859                       | (A/G)       |
| 44763       | CadSNP20358    | <i>Desi</i>      | Ca_Desig_denovo              | 32843525                       | (G/A)       |

| <b>S.N.</b> | <b>SNP IDs</b> | <b>Cultivars</b> | <b>Chromosomes/scaffolds</b> | <b>Physical positions (bp)</b> | <b>SNPs</b> |
|-------------|----------------|------------------|------------------------------|--------------------------------|-------------|
| 44764       | CadSNP20359    | <i>Desi</i>      | Ca_Desig_denovo              | 32843602                       | (G/T)       |
| 44765       | CadSNP20360    | <i>Desi</i>      | Ca_Desig_denovo              | 32849756                       | (T/C)       |
| 44766       | CadSNP20361    | <i>Desi</i>      | Ca_Desig_denovo              | 32849794                       | (C/T)       |
| 44767       | CadSNP20362    | <i>Desi</i>      | Ca_Desig_denovo              | 32864673                       | (G/A)       |
| 44768       | CadSNP20363    | <i>Desi</i>      | Ca_Desig_denovo              | 32864674                       | (C/G)       |
| 44769       | CadSNP20364    | <i>Desi</i>      | Ca_Desig_denovo              | 32887051                       | (G/A)       |
| 44770       | CadSNP20365    | <i>Desi</i>      | Ca_Desig_denovo              | 32887104                       | (G/C)       |
| 44771       | CadSNP20366    | <i>Desi</i>      | Ca_Desig_denovo              | 32934604                       | (T/C)       |
| 44772       | CadSNP20367    | <i>Desi</i>      | Ca_Desig_denovo              | 32955683                       | (T/C)       |
| 44773       | CadSNP20368    | <i>Desi</i>      | Ca_Desig_denovo              | 32955691                       | (G/A)       |
| 44774       | CadSNP20369    | <i>Desi</i>      | Ca_Desig_denovo              | 33111070                       | (C/A)       |
| 44775       | CadSNP20370    | <i>Desi</i>      | Ca_Desig_denovo              | 33274504                       | (A/C)       |
| 44776       | CadSNP20371    | <i>Desi</i>      | Ca_Desig_denovo              | 33305136                       | (G/A)       |
| 44777       | CadSNP20372    | <i>Desi</i>      | Ca_Desig_denovo              | 33305154                       | (C/A)       |
| 44778       | CadSNP20373    | <i>Desi</i>      | Ca_Desig_denovo              | 33395919                       | (T/G)       |
| 44779       | CadSNP20374    | <i>Desi</i>      | Ca_Desig_denovo              | 33764611                       | (T/C)       |
| 44780       | CadSNP20375    | <i>Desi</i>      | Ca_Desig_denovo              | 33764653                       | (A/G)       |
| 44781       | CadSNP20376    | <i>Desi</i>      | Ca_Desig_denovo              | 33834723                       | (C/T)       |
| 44782       | CadSNP20377    | <i>Desi</i>      | Ca_Desig_denovo              | 33834771                       | (G/C)       |
| 44783       | CadSNP20378    | <i>Desi</i>      | Ca_Desig_denovo              | 33946912                       | (G/A)       |
| 44784       | CadSNP20379    | <i>Desi</i>      | Ca_Desig_denovo              | 33958361                       | (C/A)       |
| 44785       | CadSNP20380    | <i>Desi</i>      | Ca_Desig_denovo              | 33958362                       | (A/G)       |
| 44786       | CadSNP20381    | <i>Desi</i>      | Ca_Desig_denovo              | 33958523                       | (T/G)       |
| 44787       | CadSNP20382    | <i>Desi</i>      | Ca_Desig_denovo              | 33963614                       | (A/G)       |
| 44788       | CadSNP20383    | <i>Desi</i>      | Ca_Desig_denovo              | 33963635                       | (C/G)       |
| 44789       | CadSNP20384    | <i>Desi</i>      | Ca_Desig_denovo              | 33972656                       | (C/G)       |
| 44790       | CadSNP20385    | <i>Desi</i>      | Ca_Desig_denovo              | 33972665                       | (C/G)       |
| 44791       | CadSNP20386    | <i>Desi</i>      | Ca_Desig_denovo              | 33974051                       | (C/A)       |
| 44792       | CadSNP20387    | <i>Desi</i>      | Ca_Desig_denovo              | 34002689                       | (C/T)       |
| 44793       | CadSNP20388    | <i>Desi</i>      | Ca_Desig_denovo              | 34002692                       | (T/C)       |
| 44794       | CadSNP20389    | <i>Desi</i>      | Ca_Desig_denovo              | 34043609                       | (A/G)       |
| 44795       | CadSNP20390    | <i>Desi</i>      | Ca_Desig_denovo              | 34046809                       | (A/G)       |
| 44796       | CadSNP20391    | <i>Desi</i>      | Ca_Desig_denovo              | 34060610                       | (G/T)       |
| 44797       | CadSNP20392    | <i>Desi</i>      | Ca_Desig_denovo              | 34060630                       | (T/G)       |
| 44798       | CadSNP20393    | <i>Desi</i>      | Ca_Desig_denovo              | 34068066                       | (T/C)       |
| 44799       | CadSNP20394    | <i>Desi</i>      | Ca_Desig_denovo              | 34082942                       | (A/G)       |
| 44800       | CadSNP20395    | <i>Desi</i>      | Ca_Desig_denovo              | 34082975                       | (G/C)       |
| 44801       | CadSNP20396    | <i>Desi</i>      | Ca_Desig_denovo              | 34100784                       | (G/A)       |

| <b>S.N.</b> | <b>SNP IDs</b> | <b>Cultivars</b> | <b>Chromosomes/scaffolds</b> | <b>Physical positions (bp)</b> | <b>SNPs</b> |
|-------------|----------------|------------------|------------------------------|--------------------------------|-------------|
| 44802       | CadSNP20397    | <i>Desi</i>      | Ca_Desig_denovo              | 34100826                       | (C/T)       |
| 44803       | CadSNP20398    | <i>Desi</i>      | Ca_Desig_denovo              | 34130262                       | (C/G)       |
| 44804       | CadSNP20399    | <i>Desi</i>      | Ca_Desig_denovo              | 34130302                       | (A/C)       |
| 44805       | CadSNP20400    | <i>Desi</i>      | Ca_Desig_denovo              | 34146098                       | (G/A)       |
| 44806       | CadSNP20401    | <i>Desi</i>      | Ca_Desig_denovo              | 34147188                       | (A/G)       |
| 44807       | CadSNP20402    | <i>Desi</i>      | Ca_Desig_denovo              | 34161266                       | (T/C)       |
| 44808       | CadSNP20403    | <i>Desi</i>      | Ca_Desig_denovo              | 34191572                       | (A/G)       |
| 44809       | CadSNP20404    | <i>Desi</i>      | Ca_Desig_denovo              | 34191620                       | (C/G)       |
| 44810       | CadSNP20405    | <i>Desi</i>      | Ca_Desig_denovo              | 34224392                       | (A/G)       |
| 44811       | CadSNP20406    | <i>Desi</i>      | Ca_Desig_denovo              | 34224402                       | (A/G)       |
| 44812       | CadSNP20407    | <i>Desi</i>      | Ca_Desig_denovo              | 34225592                       | (G/A)       |
| 44813       | CadSNP20408    | <i>Desi</i>      | Ca_Desig_denovo              | 34257992                       | (G/C)       |
| 44814       | CadSNP20409    | <i>Desi</i>      | Ca_Desig_denovo              | 34258007                       | (T/C)       |
| 44815       | CadSNP20410    | <i>Desi</i>      | Ca_Desig_denovo              | 34262885                       | (A/G)       |
| 44816       | CadSNP20411    | <i>Desi</i>      | Ca_Desig_denovo              | 34262896                       | (T/C)       |
| 44817       | CadSNP20412    | <i>Desi</i>      | Ca_Desig_denovo              | 34292583                       | (A/G)       |
| 44818       | CadSNP20413    | <i>Desi</i>      | Ca_Desig_denovo              | 34292587                       | (G/A)       |
| 44819       | CadSNP20414    | <i>Desi</i>      | Ca_Desig_denovo              | 34293854                       | (C/G)       |
| 44820       | CadSNP20415    | <i>Desi</i>      | Ca_Desig_denovo              | 34293878                       | (T/C)       |
| 44821       | CadSNP20416    | <i>Desi</i>      | Ca_Desig_denovo              | 34315070                       | (C/G)       |
| 44822       | CadSNP20417    | <i>Desi</i>      | Ca_Desig_denovo              | 34315106                       | (A/G)       |
| 44823       | CadSNP20418    | <i>Desi</i>      | Ca_Desig_denovo              | 39746958                       | (C/G)       |
| 44824       | CadSNP20419    | <i>Desi</i>      | Ca_Desig_denovo              | 43386023                       | (C/T)       |
| 44825       | CadSNP20420    | <i>Desi</i>      | Ca_Desig_denovo              | 43386033                       | (T/G)       |
| 44826       | CadSNP20421    | <i>Desi</i>      | Ca_Desig_denovo              | 43510138                       | (T/A)       |
| 44827       | CadSNP20422    | <i>Desi</i>      | Ca_Desig_denovo              | 43929590                       | (A/C)       |
| 44828       | CadSNP20423    | <i>Desi</i>      | Ca_Desig_denovo              | 43929619                       | (A/G)       |
| 44829       | CadSNP20424    | <i>Desi</i>      | Ca_Desig_denovo              | 43942980                       | (C/T)       |
| 44830       | CadSNP20425    | <i>Desi</i>      | Ca_Desig_denovo              | 44195103                       | (T/C)       |
| 44831       | CadSNP20426    | <i>Desi</i>      | Ca_Desig_denovo              | 44195104                       | (C/G)       |
| 44832       | CadSNP20427    | <i>Desi</i>      | Ca_Desig_denovo              | 44195134                       | (C/A)       |
| 44833       | CadSNP20428    | <i>Desi</i>      | Ca_Desig_denovo              | 44195157                       | (G/A)       |
| 44834       | CadSNP20429    | <i>Desi</i>      | Ca_Desig_denovo              | 44195162                       | (T/G)       |
| 44835       | CadSNP20430    | <i>Desi</i>      | Ca_Desig_denovo              | 44195165                       | (C/T)       |
| 44836       | CadSNP20431    | <i>Desi</i>      | Ca_Desig_denovo              | 44279210                       | (A/G)       |
| 44837       | CadSNP20432    | <i>Desi</i>      | Ca_Desig_denovo              | 44350686                       | (G/C)       |
| 44838       | CadSNP20433    | <i>Desi</i>      | Ca_Desig_denovo              | 44350722                       | (G/T)       |
| 44839       | CadSNP20434    | <i>Desi</i>      | Ca_Desig_denovo              | 44670432                       | (A/G)       |

| <b>S.N.</b> | <b>SNP IDs</b> | <b>Cultivars</b> | <b>Chromosomes/scaffolds</b> | <b>Physical positions (bp)</b> | <b>SNPs</b> |
|-------------|----------------|------------------|------------------------------|--------------------------------|-------------|
| 44840       | CadSNP20435    | <i>Desi</i>      | Ca_Desig_denovo              | 44670450                       | (A/T)       |
| 44841       | CadSNP20436    | <i>Desi</i>      | Ca_Desig_denovo              | 44670452                       | (G/A)       |
| 44842       | CadSNP20437    | <i>Desi</i>      | Ca_Desig_denovo              | 44670472                       | (C/T)       |
| 44843       | CadSNP20438    | <i>Desi</i>      | Ca_Desig_denovo              | 67089786                       | (T/G)       |
| 44844       | CadSNP20439    | <i>Desi</i>      | Ca_Desig_denovo              | 67089829                       | (A/G)       |

**Table S3:** Statistical measures estimated for three seed and pod yield-contributing quantitative traits in 211 chickpea minicore accessions

| <b>Traits</b>              | <b>Years*</b> | <b>Minicore accessions</b> |              |                                        |                         |
|----------------------------|---------------|----------------------------|--------------|----------------------------------------|-------------------------|
|                            |               | <b>Mean ± S.D.</b>         | <b>Range</b> | <b>Coefficient of variation (CV %)</b> | <b>Heritability (%)</b> |
| Pod number per plant (PN)  | 2011-12       | 77.6 ± 17.8                | 22.9-155.1   | 22.9                                   | 72                      |
|                            | 2012-13       | 78.5 ± 18.6                | 21.6-152.7   | 23.7                                   | 73                      |
| Seed number per plant (SN) | 2011-12       | 115.2 ± 24.5               | 32.6-199.1   | 21.3                                   | 70                      |
|                            | 2012-13       | 118.4 ± 23.8               | 30.9-202.5   | 20.1                                   | 71                      |
| 100-seed weight (g) (SW)   | 2011-12       | 11.5 ± 2.1                 | 7.8-50.9     | 18.3                                   | 83                      |
|                            | 2012-13       | 10.8 ± 2.2                 | 8.4-48.6     | 21.4                                   | 85                      |

\*One-way ANOVA probabilities (F-Prob) at  $p \leq 0.001$  showing significant trait variation among accessions across two years



**Table S4:** Statistical measures estimated for three seed and pod yield-contributing quantitative traits in parental genotypes and 283 segregating individuals of a F<sub>4</sub> mapping population (ICC 6013 x ICC 7346)

| Traits                     | Years*  | Parental genotypes |             | F <sub>4</sub> mapping population |            |                                | Heritability (%) |
|----------------------------|---------|--------------------|-------------|-----------------------------------|------------|--------------------------------|------------------|
|                            |         | ICC 6013           | ICC 7346    | Mean ± S.D.                       | Range      | Coefficient of variation (CV%) |                  |
| Pod number per plant (PN)  | 2011-12 | 130.2 ± 0.86       | 26.3 ± 0.89 | 58.4 ± 18.0                       | 12.3-139.7 | 30.8                           | 78               |
|                            | 2012-13 | 131.5 ± 1.20       | 28.7 ± 1.14 | 55.7 ± 17.4                       | 13.5-137.6 | 31.2                           | 75               |
| Seed number per plant (SN) | 2011-12 | 209.6 ± 0.78       | 42.3 ± 0.87 | 94.1 ± 28.9                       | 19.8-224.9 | 30.7                           | 71               |
|                            | 2012-13 | 208.7 ± 1.03       | 43.8 ± 0.85 | 92.6 ± 25.7                       | 21.4-218.7 | 27.8                           | 72               |
| 100-seed weight (g) (SW)   | 2011-12 | 9.5 ± 0.49         | 38.5 ± 0.58 | 30.2 ± 5.4                        | 6.0-44.9   | 17.9                           | 82               |
|                            | 2012-13 | 10.8 ± 0.69        | 36.8 ± 0.65 | 28.7 ± 4.6                        | 7.9-43.6   | 16.0                           | 84               |

\*One-way ANOVA probabilities (F-Prob) at  $p \leq 0.001$  showing significant trait variation among mapping individuals across two years

**Table S5:** Significant QTLs governing three seed and pod yield-contributing traits identified using a 283 F<sub>4</sub> mapping population (ICC 6013 x ICC 7346)

| QTLs identity*                     | Chromosomes/<br>linkage groups<br>(LGs) | Marker intervals with genetic<br>positions (cM) | LOD | Number of<br>markers<br>spanning the<br>QTL regions | Phenotypic<br>variance<br>explained<br>(PVE%) by<br>QTLs | Traits<br>associated | Additive<br>effect |
|------------------------------------|-----------------------------------------|-------------------------------------------------|-----|-----------------------------------------------------|----------------------------------------------------------|----------------------|--------------------|
| <i>qPN1.1</i>                      | Ca(LG)Chr1                              | CaSNP24 (46.1) – CaSNP28 (50.2)                 | 8.4 | 5                                                   | 23.6                                                     | PN                   | 4.2                |
| <i>qPN2.1</i> and<br><i>qSN2.1</i> | Ca(LG)Chr2                              | CaSNP36 (2.9) – CaSNP39 (9.8)                   | 7.4 | 4                                                   | 21.7                                                     | PN & SN              | 3.5                |
| <i>qSW3.1</i>                      | Ca(LG)Chr3                              | CaSNP78 (68.7) – CaSNP81 (76.1)                 | 5.7 | 4                                                   | 14.8                                                     | SW                   | 3.0                |
| <i>qSN3.1</i>                      |                                         | CaSNP90 (97.8) – CaSNP93 (100.2)                | 5.2 | 4                                                   | 13.6                                                     | SN                   | 2.8                |
| <i>qPN4.1</i>                      | Ca(LG)Chr4                              | CaSNP119 (38.3) – CaSNP122 (43.8)               | 5.5 | 4                                                   | 20.4                                                     | PN                   | 4.4                |
| <i>qSN4.1</i>                      |                                         | CaSNP152 (105.1) – CaSNP163 (108.7)             | 7.8 | 12                                                  | 21.8                                                     | SN                   | 3.9                |
| <i>qPN5.1</i> and<br><i>qSN5.1</i> | Ca(LG)Chr5                              | CaSNP180 (6.8) – CaSNP184 (18.9)                | 9.7 | 4                                                   | 28.7                                                     | PN & SN              | 4.9                |
| <i>qSW5.1</i>                      |                                         | CaSNP186 (24.7) – CaSNP187 (25.7)               | 6.5 | 2                                                   | 18.7                                                     | SW                   | 3.9                |
| <i>qPN5.2</i> and<br><i>qSN5.2</i> |                                         | CaSNP190 (38.8) – CaSNP192 (40.6)               | 7.2 | 3                                                   | 18.6                                                     | PN & SN              | 4.5                |
| <i>qSW6.1</i>                      | Ca(LG)Chr6                              | CaSNP198 (12.5) – CaSNP200 (19.7)               | 8.2 | 3                                                   | 19.5                                                     | SW                   | 3.2                |
| <i>qPN6.1</i>                      |                                         | CaSNP206 (37.7) – CaSNP207 (40.1)               | 8.0 | 2                                                   | 18.2                                                     | PN                   | 4.1                |
| <i>qPN6.2</i>                      |                                         | CaSNP211 (63.2) – CaSNP213 (68.7)               | 7.4 | 3                                                   | 19.0                                                     | PN                   | 3.8                |
| <i>qPN7.1</i>                      | Ca(LG)Chr7                              | CaSNP240 (52.6) – CaSNP244 (55.0)               | 5.4 | 5                                                   | 17.4                                                     | SW                   | 2.7                |
| <i>qSN7.1</i>                      |                                         | CaSNP250 (80.1) – CaSNP254 (85.4)               | 5.1 | 5                                                   | 15.6                                                     | PN                   | 3.2                |
| <i>qPN8.1</i>                      | Ca(LG)Chr8                              | CaSNP290 (59.4) – CaSNP292 (62.3)               | 7.4 | 3                                                   | 17.9                                                     | PN                   | 3.7                |

\**qPN1.1* (QTL for pod number/plant on chromosome 1 and QTL number 1), *qSN2.1* (QTL for seed number/plant on chromosome 2 and QTL number 1) and *qSW3.1* (QTL for 100-seed weight on chromosome 3 and QTL number 1)

**Table S6: Comprehensive genome-wide analysis of cellulose synthase superfamily in *desi* and *kabuli* chickpea**

| Cellulose Synthase Gene IDs | Gene Accession IDs | Chromosomes/Scaffolds | Physical Position (bp) |
|-----------------------------|--------------------|-----------------------|------------------------|
| <i>Ca_Kabuli_Csl1</i>       | Ca_07112           | Ca_Kabuli_chr1        | 14233203               |
| <i>Ca_Kabuli_Csl2</i>       | Ca_07110           | Ca_Kabuli_chr1        | 14249746               |
| <i>Ca_Kabuli_CesA1</i>      | Ca_17356           | Ca_Kabuli_chr1        | 18940345               |
| <i>Ca_Kabuli_Csl3</i>       | Ca_17352           | Ca_Kabuli_chr1        | 19169735               |
| <i>Ca_Kabuli_CesA2</i>      | Ca_00986           | Ca_Kabuli_chr3        | 36647913               |
| <i>Ca_Kabuli_Csl4</i>       | Ca_14854           | Ca_Kabuli_chr4        | 36120289               |
| <i>Ca_Kabuli_Csl5</i>       | Ca_18730           | Ca_Kabuli_chr5        | 7739265                |
| <i>Ca_Kabuli_CesA3</i>      | Ca_17942           | Ca_Kabuli_chr5        | 16766270               |
| <i>Ca_Kabuli_CesA4</i>      | Ca_08607           | Ca_Kabuli_chr6        | 9839639                |
| <i>Ca_Kabuli_Csl6</i>       | Ca_11218           | Ca_Kabuli_chr6        | 22207060               |
| <i>Ca_Kabuli_Csl7</i>       | Ca_11189           | Ca_Kabuli_chr6        | 22511996               |
| <i>Ca_Kabuli_Csl8</i>       | Ca_15222           | Ca_Kabuli_chr6        | 32292431               |
| <i>Ca_Kabuli_CesA5</i>      | Ca_14527           | Ca_Kabuli_chr7        | 21809443               |
| <i>Ca_Kabuli_CesA6</i>      | Ca_20248           | Ca_Kabuli_chr7        | 40282935               |
| <i>Ca_Kabuli_CesA7</i>      | Ca_11827           | Ca_Kabuli_chr8        | 909300                 |
| <i>Ca_Kabuli_CesA8</i>      | Ca_11458           | Ca_Kabuli_chr8        | 8231990                |
| <i>Ca_Desi_Csl1</i>         | Ca_00807           | Ca_Desi_chr1          | 10715729               |
| <i>Ca_Desi_CesA1</i>        | Ca_02316           | Ca_Desi_chr3          | 1625370                |
| <i>Ca_Desi_Csl2</i>         | Ca_03109           | Ca_Desi_chr3          | 14082419               |
| <i>Ca_Desi_CesA2</i>        | Ca_03621           | Ca_Desi_chr3          | 19910742               |
| <i>Ca_Desi_CesA3</i>        | Ca_04426           | Ca_Desi_chr4          | 8306224                |
| <i>Ca_Desi_CesA4</i>        | Ca_06482           | Ca_Desi_chr6          | 639996                 |
| <i>Ca_Desi_CesA5</i>        | Ca_06980           | Ca_Desi_chr6          | 6798243                |
| <i>Ca_Desi_CesA6</i>        | Ca_08059           | Ca_Desi_chr8          | 865054                 |
| <i>Ca_Desi_CesA7</i>        | Ca_20457           | Ca_Desi_scaffold12422 | 15                     |
| <i>Ca_Desi_Csl3</i>         | Ca_20864           | Ca_Desi_scaffold25119 | 53                     |
| <i>Ca_Desi_Csl4</i>         | Ca_21014           | Ca_Desi_scaffold35390 | 149                    |
| <i>Ca_Desi_Csl5</i>         | Ca_20355           | Ca_Desi_scaffold11031 | 197                    |
| <i>Ca_Desi_Csl6</i>         | Ca_18703           | Ca_Desi_scaffold03965 | 4488                   |
| <i>Ca_Desi_CesA8</i>        | Ca_16897           | Ca_Desi_scaffold02088 | 10122                  |
| <i>Ca_Desi_Csl7</i>         | Ca_17000           | Ca_Desi_scaffold02145 | 19010                  |
| <i>Ca_Desi_Csl8</i>         | Ca_11444           | Ca_Desi_scaffold00227 | 34125                  |
| <i>Ca_Desi_CesA9</i>        | Ca_13262           | Ca_Desi_scaffold00580 | 35254                  |
| <i>Ca_Desi_Csl9</i>         | Ca_11169           | Ca_Desi_scaffold00173 | 38198                  |
| <i>Ca_Desi_CesA10</i>       | Ca_20029           | Ca_Desi_scaffold8364  | 45741                  |
| <i>Ca_Desi_CesA11</i>       | Ca_13793           | Ca_Desi_scaffold00725 | 62370                  |
| <i>Ca_Desi_Csl10</i>        | Ca_13466           | Ca_Desi_scaffold00624 | 97043                  |
| <i>Ca_Desi_CesA12</i>       | Ca_10189           | Ca_Desi_scaffold01355 | 127519                 |

**Table S7:** *In vitro* pollen germination and pollen tube growth assay revealing high pollen germination and pollen tube growth efficiency in a high pod and seed number-containing chickpea accession (ICC 6013)

| Replications | Numbers of pollens used |            | Numbers (%) of pollens showed germination and pollen tube growth |                   |
|--------------|-------------------------|------------|------------------------------------------------------------------|-------------------|
|              | ICC 6013                | ICC 7346   | ICC 6013                                                         | ICC 7346          |
| I            | 200                     | 200        | 191 (95.5)                                                       | 174 (87.0)        |
| II           | 200                     | 200        | 187 (93.5)                                                       | 176 (88.0)        |
| III          | 200                     | 200        | 182 (91.0)                                                       | 172 (86.0)        |
| <b>Mean</b>  | <b>200</b>              | <b>200</b> | <b>186 (93.0)</b>                                                | <b>174 (87.0)</b> |
